# Supplementary material for: Induction of the Erythroid Differentiation of K562 Cells Is Coupled with Changes in the Inter-Chromosomal Contacts of rDNA Clusters
Source: MDPI journal article supplement (doi:10.3390/ijms24129842), 2023-06-07
Supplement: s1 [file s1]

**Supplemental Information for:**

**Induction of erythroid differentiation of K562 cells is coupled with the changes in inter-chromosomal contacts of rDNA clusters**

Nickolai A. Tchurikov,<sup>1\*</sup> Elena S. Klushevskaya<sup>1</sup>, Ildar R. Alembekov<sup>1</sup>, Antonina N. Kretova<sup>1</sup>, Vladimir R. Chechetkin<sup>1</sup>, Galina I. Kravatskaya<sup>1</sup>, Yuri V. Kravatsky<sup>1,2</sup>

<sup>1</sup>Department of Epigenetic Mechanisms of Gene Expression Regulation, Engelhardt Institute of Molecular Biology Russian Academy of Sciences, Moscow, 119334, Russia

<sup>2</sup>Center for Precision Genome Editing and Genetic Technologies for Biomedicine, Engelhardt Institute of Molecular Biology Russian Academy of Sciences, Moscow, 119334, Russia

## Tables S1–S16

**Table S1.** Lists of rDNA-contacting genes in untreated K562 cells (white) and cells treated with hemin (red), and differential analysis of the contacts of rDNA clusters with genes upon the induced differentiation of K562 cells. 4C-rDNA reads were processed as described in the Materials and Methods Section. Excel file attached separately. Related to Figure 2.

**Table S2.** GO associations with molecular functions (MF) and biological processes (BPs) (GO Profiler) of the top-3699 genes possessing  $\geq 100$  contacts with rDNA clusters. Related to Figure 1A.

| GO.ID      | Description     | padj                  | Genes                                                                                                                                                                                                                                                                                                                                                                                                                                                                                                                                                                                                                                                                                                                                                                                                                                                                                                                                                                                                                                                                                                                                                                                                                                                                                                                                                                                                                                                                                                                                                                                                                                                                                                                                                                                                                                                                                                                                                                                                                                                                                                                                                                                                                                                                                                                                                                                                                                                                                                                                                                                         |
|------------|-----------------|-----------------------|-----------------------------------------------------------------------------------------------------------------------------------------------------------------------------------------------------------------------------------------------------------------------------------------------------------------------------------------------------------------------------------------------------------------------------------------------------------------------------------------------------------------------------------------------------------------------------------------------------------------------------------------------------------------------------------------------------------------------------------------------------------------------------------------------------------------------------------------------------------------------------------------------------------------------------------------------------------------------------------------------------------------------------------------------------------------------------------------------------------------------------------------------------------------------------------------------------------------------------------------------------------------------------------------------------------------------------------------------------------------------------------------------------------------------------------------------------------------------------------------------------------------------------------------------------------------------------------------------------------------------------------------------------------------------------------------------------------------------------------------------------------------------------------------------------------------------------------------------------------------------------------------------------------------------------------------------------------------------------------------------------------------------------------------------------------------------------------------------------------------------------------------------------------------------------------------------------------------------------------------------------------------------------------------------------------------------------------------------------------------------------------------------------------------------------------------------------------------------------------------------------------------------------------------------------------------------------------------------|
| <b>MF</b>  |                 |                       |                                                                                                                                                                                                                                                                                                                                                                                                                                                                                                                                                                                                                                                                                                                                                                                                                                                                                                                                                                                                                                                                                                                                                                                                                                                                                                                                                                                                                                                                                                                                                                                                                                                                                                                                                                                                                                                                                                                                                                                                                                                                                                                                                                                                                                                                                                                                                                                                                                                                                                                                                                                               |
| GO:0005515 | protein binding | 1.155841429996664e-32 | EBNA1BP2,NOTCH2,BCAR3,MTOR,CNTN4,SPOCK1,NSG1,WWC1,I MMP2L,LRP12,PTPRD,FREM1,TRAPPC9,BNC2,NEBL,LRRC4C,TM TC1,KCNH5,MICU2,ANKS1B,POTEG,SMOC1,MYO9A,ULK2,NLK,L ONP2,UNC13C,LRRC49,SCAPER,FTO,KSR1,MGA,RFX7,AGBL1,Z NF236,PLCB1,TTC3,MX2,TMPRSS2,TAF4A,SVIL,TLN2,CLTCL1 ,ZFPM2,ARL15,MICAL3,POTEM,TENM4,NUBPL,L3MBTL4,DLC1, TNRC6B,MGAM,DPP10,ZDHHC21,PTPRA,ITPR2,RIPOR2,PDE4D, RDX,RP1,STXBP1,ERC1,RALA,NME7,SLC44A5,EPS15L1,BCL2, MYO5A,ODAD2,KCNMA1,SYT16,ARPP21,PRDM16,ARHGAP26,FBN 1,LRFN2,LPCAT2,F13A1,LRRTM4,SETBP1,GPHN,COG5,CDH8,C HRNA7,DCDC1,ROBO2,PUDP,RIMS1,PIK3C3,SPIRE1,TENM3,GA BRB3,ZEB1,TMEM132D,CNTLN,SDCCAG8,RARB,FGD4,EXOC6B,S PRED1,NAV2,SPAG16,MYO1E,TRAPPC8,PLPPR1,USH2A,CEP192 ,MINAR1,CDC42EP3,LAIR1,TTC33,RIMS2,PCMTD1,ALK,MICOS 10,AUTS2,FOXJ2,CDYL2,CARMIL1,PJA2,BABAM2,SV2C,PAPPA 2,GLIS3,FANK1,ERBIN,ERCC6L2,RHPN2,HACD2,ASTN1,UNC79 ,HLCS,FCHO2,RIN2,PARVB,ANO6,CACNG2,DLGAP1,NEGR1,GLY AT,NAALADL2,MLLT3,EGLN3,GPC6,SUSD4,CNTNAP2,MAP4,MAP 3K9,MYO3B,MOCOS,SPON1,APC,ZMYM4,ZNF595,HHLA2,TSHZ3, DSCAM,MYO5C,RTN1,TCF4,CRKL,SOX5,SETD2,ERG,ARHGAP24, TNIK,PTPRJ,EFCAB2,OCA2,KDM4C,DOCK10,TSHZ2,EGFR,RFX3 ,DENND1A,USP14,ANGPT1,CDK12,BACH1,MACF1,CTNNA3,PRKA CB,NEK7,RGS3,NCOR1,RNF220,DOCK2,DIAPH3,CCDC138,NEDD 4,MYOF,MAML2,SPATA17,SND1,SCAI,GNPTAB,CRB1,NSMCE2,B TBD9,BCL11A,SOX6,FAM83F,TMEM182,PSMB2,SGMS1,CECR2,A RMC2,FLI1,RPRD1A,PTPN4,CDH4,B3GALT5,ATP2B2,NTRK3,LA RGE1,RXFP1,C5,PDE1C,FBXL7,ZFAND6,PHACTR1,DKK2,FLT1, DNAJC13,ZNF648,RFC3,RABEP1,GK,TASP1,FNDC3B,CNTN3,TH RAP3,MAPKBP1,AOAH,GABRB1,DGKI,INVS,C12ORF4,EDAR,GRI A1,CRACD,CAST,TTC39B,NUP214,NEO1,CNTN6,CABLES1,SLC8 A3,UHRF1BP1L,MALRD1,TOM1L2,NELL2,SEZ6L,PRKD1,TBC1D1 9,PAK1,GMDS,EPA7,CTNNAL1,NCOA7,KHDRBS2,CHRM3,ADSS2 ,RALGPS1,SPEN,RAPGEF2,PELI2,LRP2,ADGRB3,DEUP1,RUNX2 ,FGF12,CPS1,TAOK3,LDLRAD3,CPEB4,TMEM38B,AGK,CSTF3,B CKDHB,RANBP17,UBE2L3,LDB2,TAF4A,SAMD5,PPP2R2B,BTBD1 1,PUM3,SYN2,CCL28,SMYD3,PATJ,HERC2,LRGUK,TMEM241,GR M7,SEPTIN9,RETREG1,RPTOR,DNAH6,GHR,WDSUB1,EPB41L3,K IF4A,THADA,DHX32,COL4A2,AIG1,SSBP3,TMEM74,RALGAP1, RAPGEF5,TBCD,NEDD4L,ADAM32,PPP1R12B,TRPM1,ADAM10,HD AC9,ZHX3,ATF7IP,UBE2G1,IL1R1,APBB2,PHACTR2,APP,RPS6 KA2,SAMSN1,KYNU,CACNA1C,KDM1B,CACNB2,KLHL13,MUTS1,P HKB,DCLK1,STAU2,GABRG2,DOCK8,MAPRE2,ZNF600,USP18,SE MA5A,SYT1,VCL,ARHGAP44,NTF3,PARP15,NDUFAF2,CD2AP,AU RKA,PARN,TTC29,PYGO1,SLC8A1,HERPUD2,CCDC116,SSBP2,P TPRR,SRGAP2C,ANKRD31,FIG4,DUX4,TAF4A,MARCHF1,CMIP,A BCG8,PLGRKT,FRMD3,UPP2,CCSER2,LOXHD1,ECPAS,SRGAP2B, KANK1,KCNE4,MAP4K4,ABCD2,BMPR1B,FMN2,THSD7A,PCSK6,A KAP6,HOMER2,CTNNA2,HADHB,POTEH,ARNT,RAB8B,PDZRN4,PA |

|  |  |  |                                                                                                                                                                                                                                                                                                                                                                                                                                                                                                                                                                                                                                                                                                                                                                                                                                                                                                                                                                                                                                                                                                                                                                                                                                                                                                                                                                                                                                                                                                                                                                                                                                                                                                                                                                                                                                                                                                                                                                                                                                                                                                                                                                                                                                                                                                                                                                                                                                                                                                                                                                                                                                                                                                                                                                                                                                                                                                                                                                                                                                                                                                                                                                                                                                                                                                                                                                                                                                                                                                                                                                                                                                                                                                                                                                                                                                                                                                                |
|--|--|--|----------------------------------------------------------------------------------------------------------------------------------------------------------------------------------------------------------------------------------------------------------------------------------------------------------------------------------------------------------------------------------------------------------------------------------------------------------------------------------------------------------------------------------------------------------------------------------------------------------------------------------------------------------------------------------------------------------------------------------------------------------------------------------------------------------------------------------------------------------------------------------------------------------------------------------------------------------------------------------------------------------------------------------------------------------------------------------------------------------------------------------------------------------------------------------------------------------------------------------------------------------------------------------------------------------------------------------------------------------------------------------------------------------------------------------------------------------------------------------------------------------------------------------------------------------------------------------------------------------------------------------------------------------------------------------------------------------------------------------------------------------------------------------------------------------------------------------------------------------------------------------------------------------------------------------------------------------------------------------------------------------------------------------------------------------------------------------------------------------------------------------------------------------------------------------------------------------------------------------------------------------------------------------------------------------------------------------------------------------------------------------------------------------------------------------------------------------------------------------------------------------------------------------------------------------------------------------------------------------------------------------------------------------------------------------------------------------------------------------------------------------------------------------------------------------------------------------------------------------------------------------------------------------------------------------------------------------------------------------------------------------------------------------------------------------------------------------------------------------------------------------------------------------------------------------------------------------------------------------------------------------------------------------------------------------------------------------------------------------------------------------------------------------------------------------------------------------------------------------------------------------------------------------------------------------------------------------------------------------------------------------------------------------------------------------------------------------------------------------------------------------------------------------------------------------------------------------------------------------------------------------------------------------------|
|  |  |  | <p> K3,PDE1A,TTL7,DIP2B,RANBP2,LARP1,ITPKB,TRPC5,RGS20<br/> ,PDE10A,UBE2E2,RAP1GDS1,HHAT,RNLS,CLIC6,CHST8,KICS2<br/> ,ERC2,TMEM236,DNM3,NBN,CUBN,SCP2,IFT57,PHF21B,INTS7<br/> ,RBM47,SUSD6,PRKCZ,CALD1,SNTG2,KLHL1,SPOP,BTLA,GRB1<br/> 0,RALYL,RYR3,TAF15,DIP2A,MSH6,MCPH1,ARHGAP32,RAB27B<br/> ,ST8SIA5,CNST,HEATR4,HECW1,DEFA3,LRRC7,MBNL2,C7ORF3<br/> 1,PHF19,MRTFA,TAF4B,ANKRD33B,COBL,SENP6,DUSP22,PDXD<br/> C1,EBF2,UBN1,SV2B,YAP1,ESS2,SEM1,NFIA,WDR70,RIPK4,Z<br/> KSCAN5,SHC4,VPS35L,BRINP1,SCGB2B2,MAPK1,ABCD3,RABGA<br/> P1L,SGTB,DNAH14,TRPC7,ADAM22,USP25,KMT2E,ALCAM,PLG,<br/> PAPPA,PCGF5,PDGFD,C2ORF88,COPB1,SYT10,ZNRF3,DNAJC21<br/> ,CCDC150,MTUS2,PPP1R1C,ABLIM1,CCDC172,ITGBL1,ARHGEF<br/> 17,NRG3,UBE20,SFMBT2,ANKFY1,NCAM1,GFRA1,NIPBL,RNF17<br/> ,SLC16A1,SPIDR,RNGTT,IPO11,EWSR1,GABPA,MICU1,CORO2B<br/> ,CARD18,CHD6,STK38,LCE1F,PTPN13,TBC1D22A,CHN1,SORCS<br/> 3,KANSL1,LIMCH1,FMN1,ECT2L,MBNL1,PAFAH1B1,ATF6,EFEM<br/> P1,DCAF1,ITGB8,STON2,ZFAND3,VPS13D,TLK1,TPM1,NF2,LR<br/> RC38,WDR25,CNKS2,RBFOX1,WDFY4,C1ORF21,HIVEP1,CORIN<br/> ,CTNNA1,PPP1R9A,ANKRD11,EFCAB8,CDH7,MOB3B,BIRC6,AKA<br/> P9,KLF15,RASGRF2,PPARA,MEIS2,SNX30,LCLAT1,NFIB,KCNS<br/> 3,ERMP1,MRTFB,PPP6R3,PRTG,RGL1,SYNJ1,NR5A2,ADAMTS3,<br/> TIAM1,MPRIP,ARAP2,GRM1,FOXJ3,UBE3D,KAZN,RSRC1,PTPRK<br/> ,ARHGEF12,GABRG1,ENAH,PAK5,ST6GALNAC3,TRERF1,EF3B6,<br/> PARD3B,PPP2R5E,PDZRN3,KIAA1958,PLA2R1,GIPC2,EIF3D,T<br/> MCO4,SEMA3C,DAPK1,NAV3,SLC24A4,SEC14L1,TMEM108,ACSM<br/> 2B,AGO2,WDHD1,PHC3,MAGI1,DNAH11,JARID2,SCN2A,RIC8B,<br/> TBC1D9,RAB22A,SORCS1,DNAJC15,AMPH,GATAD2B,CPE,PALS2<br/> ,DYSF,IL34,ANK2,STAG2,BRWD1,TANC1,THUMP2,ADGRV1,ZN<br/> F846,MELK,BCAS3,RYR2,SYNE2,BBS2,PEBP4,WNT9B,MSANTD4<br/> ,CLPX,RANBP3L,NKG7,SEMA6D,AIF1L,NBEA,DUSP16,ANKS6,S<br/> MARCA4,CDH11,USP8,LDB3,FABP7,NOL4,PARD3,SLC36A1,MAP<br/> KAP1,EFTUD2,TNRC6C,PIAS1,TBC1D5,SPG21,UBE2R2,BLK,CO<br/> L23A1,RBM6,EBF1,TNR,OLA1,DST,CXADR,DOCK4,MBD5,ATRX,<br/> NUAK1,PTPRT,XIRP2,ELAVL4,ABL1,KLHL32,AGPS,MXI1,PTPN<br/> 12,HDAC4,OXR1,SLC1A1,PRKAA1,SDC2,GAS2,SLC12A8,KCNH1<br/> ,ITGB3BP,MRPS27,LRFN5,RIMBP2,CRTAC1,DROSHA,TTL5,AP<br/> BB1IP,ANO4,L3MBTL3,DMXL2,EIPR1,APLF,NFAT5,MAST4,DNA<br/> H5,GUCY1A2,NBAS,CDH18,PSMF1,ATE1,SLFN11,RAP1A,GLIS1<br/> ,TMCO5A,ACSS3,LYRM4,MYO10,SLC46A3,GPC5,TOX3,ZNHIT6,<br/> CAMK4,BAZ2A,INPP5A,CPSF3,FGF10,FBXL13,C2ORF42,ZC3HA<br/> V1,UQCC1,GRID2,CDHR3,TGM1,PEAK1,LATS2,NRG1,SGSL,KL<br/> HL33,CLIP1,ASPM,AP3B1,DENND2B,COL6A5,EFCAB6,RASGRF1<br/> ,ATP11C,GSE1,ZNF438,DHX40,ABCB7,SYNE1,ZBTB16,MUSK,K<br/> IR3DL2,ZNF675,ACTR3C,GNG7,SMARCA1,SH3GL3,SETDB2,RP<br/> F1,PRKCE,FOXK2,SLC3A1,ASAP2,MED15,SLMAP,ESRRG,C12O<br/> RF40,USP33,DENND4C,CEP83,CERS6,FBN2,CD44,RGS12,PTPR<br/> O,EGF,PRRC1,ABCC9,TRIO,PDE3A,EXT1,STXBP6,COL5A3,NSM<br/> AF,NLRP13,LNPEP,LIMD1,PEX14,SPRED2,RPS6KA3,CTNND2,M<br/> ARCHF8,IFT43,ATP8A2,SCG5,MTMR3,PTPN2,TRIM5,LHFPL3,P<br/> LXNA2,POC5,MCF2L,ATXN3,RFC1,HTR2C,RIC3,SLC2A3,ARHGE<br/> F7,ALG10B,ATP8A1,ZCCHC7,AMBRA1,RFTN2,LTBP1,STK38L,Z<br/> FYVE9,GALNT10,GUCD1,KDM7A,OPRM1,ABCC4,PRMT8,HTR2A,B<br/> IN2,PLCXD3,FANCM,FANCA,CYBRD1,DAZL,INPP4B,MATN2,FAR<br/> S2,ETF2F2,PPP2R2C,CNNM4,KREMEN1,STAC,ANKRD28,SEMA3E<br/> ,TAF3,RPRD1B,MARK2,GCSAML,TMEM67,RCL1,EBF3,ALPL,ZNF<br/> 33B,LPP,C10ORF90,FHL2,ABHD17C,ADGRA3,CNIH3,PUM1,TMO<br/> D2,HERC1,MSH2,IGF2BP3,MPPED2,GNAL,CDIN1,EPHA6,ANKRD<br/> 17,APBA2,MAIP1,LINGO2,ZNF397,SH3KBP1,ATL1,SLC2A13,L<br/> UC7L,RELL1,CDKN2C,EPN2,KCND2,TNPO3,SNRPN,GRK3,CD163<br/> ,SPSB4,CLSPN,NOS2,BICRAL,AFG3L2,CPNE4,STK10,TTC7B,M<br/> NAT1,RBBP8,MDFIC,SGCZ,TMTC2,ADAM12,MYLK2,ANK3,SNTG1<br/> ,EMILIN2,HMGA2,MYOM2,COG2,CCND3,BCL11B,VPS41,FOLH1,<br/> DOCK5,F5,ECE1,KLHL4,ZIM3,STK32A,CREM,LYPLA1,MBP,AK8<br/> ,TRPS1,TRAPPC11,HHIPL1,PLCE1,TGFA,IL17RA,ANKFN1,HIP<br/> 1,CRIM1,XPNPEP1,FUT9,PRR5L,VPS37A,ATP6V1E1,UTP4,VAV<br/> 1,CDH20,MSRA,RUFY2,FBXO32,TJP1,LDLRAD4,NPHP4,EGFLAM </p> |
|--|--|--|----------------------------------------------------------------------------------------------------------------------------------------------------------------------------------------------------------------------------------------------------------------------------------------------------------------------------------------------------------------------------------------------------------------------------------------------------------------------------------------------------------------------------------------------------------------------------------------------------------------------------------------------------------------------------------------------------------------------------------------------------------------------------------------------------------------------------------------------------------------------------------------------------------------------------------------------------------------------------------------------------------------------------------------------------------------------------------------------------------------------------------------------------------------------------------------------------------------------------------------------------------------------------------------------------------------------------------------------------------------------------------------------------------------------------------------------------------------------------------------------------------------------------------------------------------------------------------------------------------------------------------------------------------------------------------------------------------------------------------------------------------------------------------------------------------------------------------------------------------------------------------------------------------------------------------------------------------------------------------------------------------------------------------------------------------------------------------------------------------------------------------------------------------------------------------------------------------------------------------------------------------------------------------------------------------------------------------------------------------------------------------------------------------------------------------------------------------------------------------------------------------------------------------------------------------------------------------------------------------------------------------------------------------------------------------------------------------------------------------------------------------------------------------------------------------------------------------------------------------------------------------------------------------------------------------------------------------------------------------------------------------------------------------------------------------------------------------------------------------------------------------------------------------------------------------------------------------------------------------------------------------------------------------------------------------------------------------------------------------------------------------------------------------------------------------------------------------------------------------------------------------------------------------------------------------------------------------------------------------------------------------------------------------------------------------------------------------------------------------------------------------------------------------------------------------------------------------------------------------------------------------------------------------------|

|  |  |  |                                                                                                                                                                                                                                                                                                                                                                                                                                                                                                                                                                                                                                                                                                                                                                                                                                                                                                                                                                                                                                                                                                                                                                                                                                                                                                                                                                                                                                                                                                                                                                                                                                                                                                                                                                                                                                                                                                                                                                                                                                                                                                                                                                                                                                                                                                                                                                                                                                                                                                                                                                                                                                                                                                                                                                                                                                                                                                                                                                                                                                                                                                                                                                                                                                                                                                                                                                                                                         |
|--|--|--|-------------------------------------------------------------------------------------------------------------------------------------------------------------------------------------------------------------------------------------------------------------------------------------------------------------------------------------------------------------------------------------------------------------------------------------------------------------------------------------------------------------------------------------------------------------------------------------------------------------------------------------------------------------------------------------------------------------------------------------------------------------------------------------------------------------------------------------------------------------------------------------------------------------------------------------------------------------------------------------------------------------------------------------------------------------------------------------------------------------------------------------------------------------------------------------------------------------------------------------------------------------------------------------------------------------------------------------------------------------------------------------------------------------------------------------------------------------------------------------------------------------------------------------------------------------------------------------------------------------------------------------------------------------------------------------------------------------------------------------------------------------------------------------------------------------------------------------------------------------------------------------------------------------------------------------------------------------------------------------------------------------------------------------------------------------------------------------------------------------------------------------------------------------------------------------------------------------------------------------------------------------------------------------------------------------------------------------------------------------------------------------------------------------------------------------------------------------------------------------------------------------------------------------------------------------------------------------------------------------------------------------------------------------------------------------------------------------------------------------------------------------------------------------------------------------------------------------------------------------------------------------------------------------------------------------------------------------------------------------------------------------------------------------------------------------------------------------------------------------------------------------------------------------------------------------------------------------------------------------------------------------------------------------------------------------------------------------------------------------------------------------------------------------------------|
|  |  |  | <p>,PACSIN2,CNTN1,HLA-B,TARS3,FKBP5,IQSEC1,MTHFD1L,SNX3,CACNA1I,NAA35,PDLIM5,KCNJ15,CEPT1,BRCA2,AQR,DISC1,ZBTB2,EXD3,DNER,BLM,ASB7,WDPCP,SEMA3A,MAGI3,HSF2BP,INTS8,NAP1L4,LIN54,LRP1B,ADCY10,PSG8,STRN,AGL,ZNF121,ANKRD30BL,STX12,PHACTR3,BMP2,MYLK4,UNC5D,ATP9A,FAM217B,TRAK1,WDR26,PSG9,CDC42BPB,EVI5,PTCD2,MSR1,VRK1,GNAI1,RALGAP2,SGSM1,ZC3H14,NCAM2,GFI1B,TBC1D4,RANBP9,RESF1,MYRIP,TR,HPICAL1,RIN3,MSI2,TPGS2,DNAL1,SLC15A5,RNF38,TTC6,PGPEP1,TMEM161A,SEMA3D,ASXL3,NETO2,PDE6C,ANKRD7,CABIN1,LEMD3,RELN,ARHGAP42,HMGB1,GNAQ,TUBGCP3,NUDCD3,CD52,AP4E1,FGF9,NFATC2,TDRD7,SH3BP5,CPAMD8,RTTN,MDM1,ZNF106,C19ORF18,MYOM1,ZNF567,CLVS1,TRAF3,ZNF462,ANKRD26,ESRP1,UNC13B,TTC21B,ETS2,UBAP2L,GEMIN5,UIMC1,DOCK1,LRRFIP1,TSPAN2,PFKFB4,RAP1GAP,PLS1,SRGAP2,IKZF2,SNX8,SEC23B,ENOX1,SLC39A6,NIN,HAUS6,DRAKIN,DNAH8,TRIT1,ATF1,CCDC186,SLAMF1,SMARCA2,ETS1,FAM83B,GLI3,CGAS,MEGF11,SMARCC1,SNX6,GABRR2,SMOC2,PACS1,PCP4,CNKSR3,CASP5,VENTX,IDE,WDR12,KIF21A,KIF15,PRDM10,CUL1,ZFYVE26,RERE,PSD3,MAP2,ANKMY1,BTAF1,GAREM1,DAW1,FBXO47,PEX6,ZNF618,FARP1,MOB1B,ATF2,NDUFAF6,GOLGA8B,HIRA,CYLD,UMODL1,BBS4,LRRRC8B,MAPK8IP1,MX1,TMEM171,ZMAT4,CLVS2,PSG6,HIVEP3,COL5A1,GABBR2,PSIP1,ITGA9,KIAA0753,CFTR,MYEOV,KPNA1,CSE1L,NELL1,DOP1B,TBC1D13,UBASH3A,AHDC1,FAM214A,COL14A1,RGMB,NEU3,PHAF1,CEP44,MRPL13,KITLG,ZZEF1,DNAJC7,ATP10B,CAMTA1,UBR1,DCC,SMDDL3A,CHRM5,MAP4K3,YLPM1,SLC30A10,RCAN1,GTTF2I,RORB,CHAF1A,TADA2A,DAB1,MED27,SELENON,RB1CC1,MYO3A,AKAP10,UBE2E1,PTPRE,REPS1,PRKN,AGMO,MTMR2,SH3PXD2A,ZFAND4,SPSB1,CDC42BPA,TBX20,SP110,CCDC102B,DLGAP2,AFAP1,MAPK10,DACH1,ZNF541,FBXO3,RWDD2B,DPF3,LGI2,LYST,NGEF,GRIN2A,ARID5B,H2BC15,JPH1,TXNRD2,ATXN1,WSB1,TRPM6,CDH23,PRKCH,PKP1,HUNK,TG,IL6R,FRMPD4,PEPD,ALS2,RACGAP1,NLRC5,ZNF627,OR51E1,ACO1,ANKRD30A,TFDP1,DHRS11,CNOT6L,MKNK1,HEMGN,KANK4,DOCK9,DMC1,FBLN5,LCE3B,KCNQ3,TOX,POLR1D,SHISA9,SLC4A4,PTPRB,ZFP90,TRMT61B,PD6A,COPS8,TSPAN33,TBATA,ZNF124,SCN10A,LRBA,RBMX2,ANKRD55,SHANK2,ST8SIA1,ANKRD18A,MAP7,USP7,VAV3,PSMA1,MON2,LRRRC37A3,TASOR2,PLAGL1,KCND3,HAAO,FAH,MESD,ITSN2,SOX30,PTGFRN,KIAA0825,SYBU,KIR2DL4,ARHGEF28,RALB,NPAS2,ADGRG6,YIPF6,KCNN3,MYO1D,SEC24D,PPA2,FAR1,CA1,ROCK1,LYN,VCAM1,SEL1L,ARHGAP31,CTSB,EIF2B3,LRIG1,TTC37,SUMO3,SLC15A2,ZNF169,PLEKHB2,KIF11,DTX1,BZW1,TENM2,OVOL2,PIWIL3,ZBTB33,ADA2,NTN1,CHKA,PLCB4,ZFHX3,FANCL,DPYSL5,SLC13A5,ZNF44,RRAGD,BANP,SUPT16H,ARID1B,HOXC13,CRACR2A,FAM81A,RNF152,BAZ1A,OTUD7A,INSR,CUL5,NMBT1,OR7A17,BMF,YTHDF3,TFF1,DEDD2,NEK6,HECTD1,GRID1,SHROOM3,XRCC4,COLQ,FAM118A,SLC52A1,HDAC11,NMU,LYPLAL1,DDHD1,PBX3,SUMO2,HS1BP3,DPYD,ARFGF1,PDE4DIP,GAST,POGK,SNAI2,ASH1L,UBL3,IGHV3-74,HOXC4,BID,SIAH2,PIGK,OSBPL10,RPH3A,TANC2,ZBTB80S,COX5A,TRABD2B,UFD1,RXRG,SP3,DRAM1,ERN2,FNDC1,MBTPS2,FLNB,TRIM58,TIAL1,TOM1,ELF2,IFI44,PLPP4,NREP,ZDHC17,NSD2,FYCO1,CERS3,ESYT2,SH3GLB1,SLC22A14,CD9,CARD10,LTN1,KRT6B,RALGPS2,TWIST2,CTIF,SAMHD1,HSD17B14,IFT81,ENPP1,ENTPD5,UTRN,MOCS2,RASGRP1,IGSF11,SNX9,CDH26,DZANK1,PXDNL,UCK2,NDRG2,CSNK2A1,BMP5,PWWP3A,WDR72,KCNC1,CSF1,GHRH,PPIL6,POTEB3,EOGT,CCDC34,HDGFL3,NUP37,BCL2L1,SERPINB9,SCAF4,KRT25,CTDP1,HCN1,PRKG1,LAMA3,ASB4,GRIN2B,ST13,ANKRD66,GRB14,TMEM71,INO80,FANCB,IGHV2-70D,CLNS1A,CNMD,KIF21B,SMAD5,CELF4,SYNJ2,TCERG1,ABCG1,FOXN3,KCNK5,DCUN1D4,PLXDC2,VSTM4,SLC40A1,PRAME,HADHA,MYCL,TNN,FAM149B1,CABYR,CIDEC,KLHL7,PSAP,PSMA5,CFHR4,MICALL2,MED1,IPCEF1,POTEB2,ATG4B,CDC14B,PCNT,KDM6A,ATRN,IL33,AJAP1,GPRC5C,TLNRD1,ROR2,CFH,PPP2R</p> |
|--|--|--|-------------------------------------------------------------------------------------------------------------------------------------------------------------------------------------------------------------------------------------------------------------------------------------------------------------------------------------------------------------------------------------------------------------------------------------------------------------------------------------------------------------------------------------------------------------------------------------------------------------------------------------------------------------------------------------------------------------------------------------------------------------------------------------------------------------------------------------------------------------------------------------------------------------------------------------------------------------------------------------------------------------------------------------------------------------------------------------------------------------------------------------------------------------------------------------------------------------------------------------------------------------------------------------------------------------------------------------------------------------------------------------------------------------------------------------------------------------------------------------------------------------------------------------------------------------------------------------------------------------------------------------------------------------------------------------------------------------------------------------------------------------------------------------------------------------------------------------------------------------------------------------------------------------------------------------------------------------------------------------------------------------------------------------------------------------------------------------------------------------------------------------------------------------------------------------------------------------------------------------------------------------------------------------------------------------------------------------------------------------------------------------------------------------------------------------------------------------------------------------------------------------------------------------------------------------------------------------------------------------------------------------------------------------------------------------------------------------------------------------------------------------------------------------------------------------------------------------------------------------------------------------------------------------------------------------------------------------------------------------------------------------------------------------------------------------------------------------------------------------------------------------------------------------------------------------------------------------------------------------------------------------------------------------------------------------------------------------------------------------------------------------------------------------------------|

|  |  |  |                                                                                                                                                                                                                                                                                                                                                                                                                                                                                                                                                                                                                                                                                                                                                                                                                                                                                                                                                                                                                                                                                                                                                                                                                                                                                                                                                                                                                                                                                                                                                                                                                                                                                                                                                                                                                                                                                                                                                                                                                                                                                                                                                                                                                                                                                                                                                                                                                                                                                                                                                                                                                                                                                                                                                                                                                                                                                                                                                                                                                                                                                                                                                                                                                                                                                                                                                                                                      |
|--|--|--|------------------------------------------------------------------------------------------------------------------------------------------------------------------------------------------------------------------------------------------------------------------------------------------------------------------------------------------------------------------------------------------------------------------------------------------------------------------------------------------------------------------------------------------------------------------------------------------------------------------------------------------------------------------------------------------------------------------------------------------------------------------------------------------------------------------------------------------------------------------------------------------------------------------------------------------------------------------------------------------------------------------------------------------------------------------------------------------------------------------------------------------------------------------------------------------------------------------------------------------------------------------------------------------------------------------------------------------------------------------------------------------------------------------------------------------------------------------------------------------------------------------------------------------------------------------------------------------------------------------------------------------------------------------------------------------------------------------------------------------------------------------------------------------------------------------------------------------------------------------------------------------------------------------------------------------------------------------------------------------------------------------------------------------------------------------------------------------------------------------------------------------------------------------------------------------------------------------------------------------------------------------------------------------------------------------------------------------------------------------------------------------------------------------------------------------------------------------------------------------------------------------------------------------------------------------------------------------------------------------------------------------------------------------------------------------------------------------------------------------------------------------------------------------------------------------------------------------------------------------------------------------------------------------------------------------------------------------------------------------------------------------------------------------------------------------------------------------------------------------------------------------------------------------------------------------------------------------------------------------------------------------------------------------------------------------------------------------------------------------------------------------------------|
|  |  |  | <p>2A,ZNF521,NPL,KL,BANK1,CSDE1,FAT1,HGD,OTOG,LMX1A,IL10,ACTR2,SFPQ,SCML2,CALN1,RIOK1,CLSTN2,TTC39C,PTH,OSTDC1,TOP3B,PRKAA2,CSF2RB,DIRAS2,SKA1,NDC80,GOLGA8G,RNF182,SOHLH1,LARP6,PACRG,ERO1B,PHF20L1,ITPRIP,VSTM2A,FAM204A,MAP6,VASP,ETV6,TACC2,SCFD2,SHISAL1,PALMD,SNRPC,KIFC1,IQGA1,RPS12,PRB3,CAMLG,ZBTB7C,TEAD1,MORC2,SREBF2,ANP32B,YBX3,AIMP1,LASP1,THNSL2,FYB2,NRXN1,EPHX4,PCID2,HIPK1,ENTHD1,CISD1,CIB4,SNAP91,CD70,CYP4F22,CIBAR1,PBLD,FICD,ERICH5,CACYBP,CADM1,CENPE,PEG10,LMX1B,NET1,SIPA1L2,TUBB6,NGDN,ELOC,ANLN,TWIST1,AKT3,ALKAL2,JAK2,ADAM28,VSX1,RPF2,FSTL1,CHCHD6,ZBTB38,MPPE1,ISX,MADD,PTGS1,PATL1,ZNF449,PRSS2,FH,TDP1,CREBBP,MELTF,MRM1,TNKS,ARL11,SGO1,GORAB,PCNA,SI AH3,TRPV5,UFL1,ADAMTS5,NFKBIA,PRKCB,ANKRD24,FBXW2,C FAP299,NTM,KIF6,ABCC8,ANXA4,MT1HL1,ZC3H15,ANP32A,OTULINL,RFC2,SMTN,ST6GAL2,ALX4,RTRAF,USH1C,BRD4,ZBTB21,SERBP1,NEDD9,OLFM4,NRBP1,ITGA6,ATP2B1,GAP43,SLC14A2,DGLUCY,ASS1,MTCL1,GRIPI,IGHV10R15-9,CTNNBL1,GTSL1L,SAR1A,EML1,CNIH1,MAST2,HPSE2,BTG3,ERLIN2,GOLGA8J,TRAPPC3,MAPK1IP1L,UBAP2,ADAMTSL3,EFHD2,CIDEA,PCMTD2,ZBTB49,BBS9,EXT2,EXOC1,KRT6A,AGO1,FRA10AC1,DIPK1A,MEOX2,SLC6A1,GID8,ELL2,GRXCR1,SDS,LI NGO1,SNAPC3,STAT1,ZCCHC14,BRMS1L,FAM189A2,NDFIP2,NR2C1,MAP2K6,S100BPB,CMTM7,VAT1L,ERICH3,SHROOM2,KCNJ18,MARCHF6,MTPN,ABI1,MYO18B,NECTIN4,ARMC6,CEMIP,POU6F2,IMPACT,CBLIF,CCBE1,SLX4IP,PARK7,MAPK8,ITGA4,TOP3A,OAZ2,EIF3F,PPME1,MED12L,ZSCAN30,FBXL17,UBL7,POU1F1,UBE2J2,ADCYAP1R1,MTF2,CSMD1,NCAPG2,TM9SF4,RAPGEF4,SCGB1D1,FOXP2,ASB2,MYOCD,HMCN1,CEP120,MYH13,DHTKD1,CYFIP2,UBE2QL1,HNRNPM,ACACA,KRT85,ASCC2,ARL4C,EFHB,ARID3B,MEF2C,STOML1,ZNF613,ADGRB1,RXRA,WNT7A,RBPMS2,ECHDC1,OXNAD1,MAP3K5,NDFIP1,IKBIP,MAP3K4,TRIM43B,WASF3,S100B,SERPINI2,PRDM13,TRIM43,FOXO6,ERL1,SUMF1,CD82,ATP6V1C2,C9ORF43,CHAMP1,C16ORF72,BTF3L4,MAGEL2,PKN2,RAD51AP1,SLC10A6,FAM25C,PDE2A,RAB38,LRRC2,KRTAP21-2,SFI1,DBF4B,FBXW8,SDCBP,NECTIN1,DSG1,JPT2,SPPL2B,N SMCE1,C3ORF52,COMMD8,ERICH1,WWOX,ZBTB25,FAM72A,PASK,MLLT1,MS4A4A,NCK1,FLVCR1,SCAF8,FGR,CWC22,CCDC106,DRC7,CDCA8,PPP2R3A,DNMBP,TRIM23,ATP6V1B2,CXCL2,TP1,FAM72B,SNAP29,FAM72D,MLLT10,C2,IFNAR1,RNF8,NG12,LC E3D,KLHL29,EPHA4,PIIP5K2,TEX29,CYTH4,EMP1,INTS13,GABRA5,KIAA0319L,MECOM,DNMT3L,NTRK2,ANKRD20A1,IL1RAPL1,FNDC3A,RSPH1,KHDC4,NUMB,LHX9,WNT2B,COLEC12,ZBTB10,TNNI1,PLEKHA3,OCN,CCDC152,POSTN,FAM110A,CREB5,SNRPD1,SHISA6,MEGF10,FBXO31,EXTL3,AKAP11,TRPM7,KTN1,KRTAP26-1,PRKAB1,DTHD1,IREB2,MVB12B,HS6ST1,PTK2,ERP27,MARK4,CDH5,ANKRD6,APOL2,SCGN,NFKBID,ARHGAP12,CLDN18,ASCL3,MPP7,DIAPH1,FBXO41,FEZ2,INIP,LAMB1,SCAMP1,APIP,CYFIP1,UBE3A,TMEM54,SCG3,APOL1,SEMA4D,JAM2,DNAH10,PITPNC1,FRMD6,MC2R,ZBTB20,FAT4,IMPA2,FAM102A,LRMDA,AP2B1,RUNX1,AKR1B1,C9,KIRREL1,WNT5B,RASGEF1B,AMFR,SAXO1,SCARA5,CTSE,NENF,SH2D1B,HEATR5A,PSTPIP2,ZFYVE1,SNBR,ASAP1,SAMD13,ICA1,EDIL3,NOS1AP,MTTP,TPTE,SORBS2,PDCL3,SRP9,CNKSRI,CCDC88A,UBAP1L,CHCHD2,SPAG6,SLC5A1,MDN1,CDC45,BICD1,TNFSF11,FYN,BUB1,KDM5A,PCBP3,MYL12B,NLRP14,PPM1F,GOLGA8F,UNC45B,ARL13B,XPO7,SDE2,UHRF2,SCN8A,HDAC2,SNTB1,AVEN,SLF1,SACM1L,TBX15,SH2D3C,PSME3IP1,DOCK3,TRNAU1AP,NCS1,COL18A1,CDH9,LHFPL2,LYSMD2,ATP5PF,ALB,DOK5,NALCN,UGP2,MTMR7,EHBP1,ZFYVE28,MAPK9,RSPH14,PABPC1,CRTAM,APELA,MDGA2,STT3A,DEFB108B,ROR1,SLC16A9,GALNT2,FUT8,ARNT2,ASB3,HECW2,POTEJ,CDH2,CNTN5,ITGA8,SEL1L2,FBXL20,NTN4,RAD9A,XRN2,PHLPP1,PLEKHA2,GPR137B,EPHB1,GRM5,RAI14,SPOPL,ZNF705D,RPS6KA5,SPTB,TBC1D1,LRRC69,PTPRG,ANKRD36C,PID1,NRP</p> |
|--|--|--|------------------------------------------------------------------------------------------------------------------------------------------------------------------------------------------------------------------------------------------------------------------------------------------------------------------------------------------------------------------------------------------------------------------------------------------------------------------------------------------------------------------------------------------------------------------------------------------------------------------------------------------------------------------------------------------------------------------------------------------------------------------------------------------------------------------------------------------------------------------------------------------------------------------------------------------------------------------------------------------------------------------------------------------------------------------------------------------------------------------------------------------------------------------------------------------------------------------------------------------------------------------------------------------------------------------------------------------------------------------------------------------------------------------------------------------------------------------------------------------------------------------------------------------------------------------------------------------------------------------------------------------------------------------------------------------------------------------------------------------------------------------------------------------------------------------------------------------------------------------------------------------------------------------------------------------------------------------------------------------------------------------------------------------------------------------------------------------------------------------------------------------------------------------------------------------------------------------------------------------------------------------------------------------------------------------------------------------------------------------------------------------------------------------------------------------------------------------------------------------------------------------------------------------------------------------------------------------------------------------------------------------------------------------------------------------------------------------------------------------------------------------------------------------------------------------------------------------------------------------------------------------------------------------------------------------------------------------------------------------------------------------------------------------------------------------------------------------------------------------------------------------------------------------------------------------------------------------------------------------------------------------------------------------------------------------------------------------------------------------------------------------------------|

|            |             |                       |                                                                                                                                                                                                                                                                                                                                                                                                                                                                                                                                                                                                                                                                                                                                                                                                                                                                                                                                                                                                                                                                                                                                                                                                                                                                                                                                                                                                                                                                                                                                                                                                                                                                                                                                                                                                                                                                                                                                                                                                                                                                                                                                                                                                                                                                                                                                                                                                                                                                                                                                                                                                                                                                                                                                                                                                         |
|------------|-------------|-----------------------|---------------------------------------------------------------------------------------------------------------------------------------------------------------------------------------------------------------------------------------------------------------------------------------------------------------------------------------------------------------------------------------------------------------------------------------------------------------------------------------------------------------------------------------------------------------------------------------------------------------------------------------------------------------------------------------------------------------------------------------------------------------------------------------------------------------------------------------------------------------------------------------------------------------------------------------------------------------------------------------------------------------------------------------------------------------------------------------------------------------------------------------------------------------------------------------------------------------------------------------------------------------------------------------------------------------------------------------------------------------------------------------------------------------------------------------------------------------------------------------------------------------------------------------------------------------------------------------------------------------------------------------------------------------------------------------------------------------------------------------------------------------------------------------------------------------------------------------------------------------------------------------------------------------------------------------------------------------------------------------------------------------------------------------------------------------------------------------------------------------------------------------------------------------------------------------------------------------------------------------------------------------------------------------------------------------------------------------------------------------------------------------------------------------------------------------------------------------------------------------------------------------------------------------------------------------------------------------------------------------------------------------------------------------------------------------------------------------------------------------------------------------------------------------------------------|
|            |             |                       | <p>1, FCHSD2, SDK1, PRKCA, GBP4, IFT46, NLRP4, ANKRD36B, ATPSC KMT, SPHKAP, FAIM, SAMD12, USP24, FAAP24, MOGAT3, FHIT, ITG A1, PCCA, CROT, KLF12, RNF138, RC3H1, NRIP1, CHODL, POR, SLC 14A1, MCC, GOLGA8S, SUPT3H, BCR, TUT4, NRXN3, ELMO1, RGS6, R ERG, NLRP8, TCERG1L, KIF16B, CDH12, PRIM2, ARMC3, MIPOL1, C 14ORF39, ARFGAP3, SENP8, USP49, ELP2, CFAP70, FBLN1, STK36 ,NSG2, PAQR5, RAG1, KCNJ6, B9D1, ZMYM1, DGCR2, DNPEP, RRAS2 ,GNA14, BMPER, RABL2A, KIAA1328, PRDM15, SRGAP3, SLC35F1, ZNF420, MACROH2A1, MITF, NBPf1, EPHB2, TOGARAM1, CSNK1G1, SACS, BCL2L13, RNF11, SGCG, CD38, EYA4, CHCHD3, MYO5B, RGPD 4, PPIL2, CDK14, RSRP1, AKAIN1, MET, MUC16, SPPL3, DLG2, CDH 17, COMMD10, ATP6V0D2, SPECC1, CAMK1G, IBA57, METTL15, PPF IA2, CDH13, STXBP4, POTES, MAB21L3, KRTAP19- 7, CACNG3, ATG5, USP32, NRAP, MAGI2, KIAA1217, PRDM11, VMP1 ,FAM171A1, MLIP, FLRT2, MYB, KALRN, ZNF704, SLC1A2, GNAS, L AMA1, MFHAS1, CPQ, NUP43, TRIM9, ATRNL1, TIAM2, DHX29, BMP7 ,TTC28, TMPRSS15, ASTN2, DLG5, TNFAIP8, ZMYND8, GAPVD1, RN F217, KIRREL3, PRSS23, KCTD1, GOLGA6A, DNAH3, BPTF, BTBD10 ,CCSER1, AK3, ZMYND11, TMEM25, NUDT21, TRAPPC10, GRM3, KMT 2C, DDX6, ADGRF5, UPRT, PDGFC, WDR41, DNAH17, PLIN2, PPP1R1 3B, ELOVL7, FOCAD, EPB41L4A, ABL2, TRAPPC6B, BACE2, RFX2, P ARPBP, NECAB1, PKNOX2, EYA1, FHOD3, PDZD2, TTLL11, GOLGA8T ,PRPF18, SLIT2, CMPK1, TMPRSS3, EXOC4, CNOT7, FAM126A, KCN IP4, ESCO1, KCTD8, CDC141, PLCL1, ERBB4, ANKRD30B, IL20RB ,FAM3B, FAM126B, GSAP, SYNDIG1, ROBO1, SAMD4A, PBX1, SPATS 2L, IRAG1, NPAS3, NUF2, PRKCQ, RGPD2, IPP, SAMM50, ANTXR1, N DRG1, MYH15, SORCS2, SIPA1L3, TRDN, ZNF679, NLGN1, SYNPR, C TTNPB2, SHLD2, NOS1, SLC6A3, GLDC, CHD9, PRR16, ASIC2, TXND C16, EFNA5, TCF12, LRRC9, GAS2L1, ARHGEF11, MTREX, VCAN, RA B27A, NSD1, EHMT1, SLIT3, DTNA, KIF13A, AP5M1, FRMD5, ESR1 ,DNAH9, SLC25A48, MYO9B, NTNG1, CYP2C8, KCNQ5, LOXL2, NYAP2 ,IGLC3, ANKRD36, C16ORF74, CEP57L1, IQCJ- SCHIP1, MPDZ, FAM153A, IRAG2, ADGRG7, ORC4, SKAP2, PRLR, AG O3, HTT, FOXB1, RAD51B, CAMK1D, PIK3R3, SLC25A18, CFAP44, P OTEC, CDKAL1, EML6, OPCML, AK2, HLA- F, FER, ZNF302, EVA1A, EYA2, CCR2, RPGRIP1, STARD13, PITPNM 3, SNTB2, WDR64, INTS12, A2M, WDFY3, CHFR, PCMT1, EPS8, OSBP L6, JAZF1, ZNF578, OARD1, SPOCK3, SEMA4B, NRF1, IGHV10R21- 1, ANO2, PHC2, GRIA4, AGAP1, ROCK2, PRDM1, RORA, STMP1, IL16 ,TERB2, DMRT1, EIF4G3, CDCA5, PPP1CB, CATSPER2, RGS8, RAB3 1, PDK1, HSPG2, PSMD2, PTPRQ, HERPUD1, NCOA6, TRIM2, COL4A3 ,WASHC1, RGS7, HOOK3, KIF7, GNG2, PCSK2, FSTL4, CLDN10, BAR D1, PALD1, CLCN5, HSPA12A, STK3, DEPTOR, ZNF423, SLC13A4, C 1QL3, RSU1, HNRNPU, VTI1A, CEP72, RAB3GAP2, TULP4, CADPS, A PCDD1, IGF1R, KCNAB1, PRKAG2, GLI2, ANKRD10, MFSD11, APMAP ,IQCM, THRB, LSAMP, AKAP13, MORC3, ATP10A, SEPTIN6, DNML</p> |
| GO:0043167 | ion binding | 9.230719696092971e-26 | <p>NOTCH2, MTOR, CACNA2D3, SPOCK1, EXOC1L, ABCA13, FREM1, BNC 2, MICU2, SMOC1, MYO9A, ULK2, NLK, LONP2, UNC13C, SCAPER, FT O, KSR1, AGBL1, ZNF236, PLCB1, ZNF536, TTC3, MX2, LIPI, SVIL ,ZFPM2, ARL15, MICAL3, NUBPL, L3MBTL4, ITPR2, PDE4D, RALA ,NME7, EPS15L1, MYO5A, KCNMA1, PRDM16, FBN1, LPCAT2, F13A1, GPHN, CDH8, CHRNA7, PUDP, RIMS1, PIK3C3, ZEB1, AKR1C3, RARB ,FGD4, GALNT1, NAV2, ENPEP, MYO1E, RIMS2, ALK, ADGRE1, PCDH 7, MCTP1, PJA2, PAPP2, GLIS3, ERCC6L2, HLCS, FCHO2, ANO6, Z NF880, EGLN3, MAP3K9, MYO3B, MOCOS, SPON1, CPA6, ZMYM4, ZNF 595, TSHZ3, MYO5C, SETD2, ZNF573, TNIK, EFCAB2, KDM4C, NEK4 ,TSHZ2, EGFR, ZNF280B, CDK12, MACF1, PRKACB, NEK7, RNF220, HMCN2, ZNF407, MYOF, GNPTAB, CRB1, NSMCE2, BCL11A, CHSY1, C DH4, ATP2B2, NTRK3, LARGE1, RXFP1, PDE1C, ZFAND6, CYP2C9, F LT1, ZNF648, ADAMTS6, ZNF382, GK, THRAP3, AOA, DGKI, SLC8A 3, NELL2, PRKD1, PAK1, GMDS, EPHA7, CHRM3, ADSS2, GRAMD1B, C HSY3, RAPGEF2, LRP2, RUNX2, ARSB, CPS1, TAOK3, CPEB4, AGK, P RICKLE2, RANBP17, UBE2L3, SYN2, SMYD3, TYW1, HERC2, LRUGK, GRM7, SEPTIN9, DNAH6, KIF4A, DHX32, ADAM10, HDAC9, ZHX3, UB E2G1, APP, ABCB5, ADK, RPS6KA2, KYNU, CACNA1C, KDM1B, DCLK1 ,ZNF600, SYT1, ACER2, PARP15, ZNF723, AURKA, PARN, ST18, PY</p>                                                                                                                                                                                                                                                                                                                                                                                                                                                                                                                                                                                                                                                                                                                                                                                                                                                                                                                                                                                                                                                                                                                                                                                                                                                                                                                                                                                                                                                                                                                                                    |

|  |  |  |                                                                                                                                                                                                                                                                                                                                                                                                                                                                                                                                                                                                                                                                                                                                                                                                                                                                                                                                                                                                                                                                                                                                                                                                                                                                                                                                                                                                                                                                                                                                                                                                                                                                                                                                                                                                                                                                                                                                                                                                                                                                                                                                                                                                                                                                                                                                                                                                                                                                                                                                                                                                                                                                                                                                                                                                                                                                                                                                                                                                                                                                                                                                                                                                                                                                                                                                                                                                                                                                                                                                                                   |
|--|--|--|-------------------------------------------------------------------------------------------------------------------------------------------------------------------------------------------------------------------------------------------------------------------------------------------------------------------------------------------------------------------------------------------------------------------------------------------------------------------------------------------------------------------------------------------------------------------------------------------------------------------------------------------------------------------------------------------------------------------------------------------------------------------------------------------------------------------------------------------------------------------------------------------------------------------------------------------------------------------------------------------------------------------------------------------------------------------------------------------------------------------------------------------------------------------------------------------------------------------------------------------------------------------------------------------------------------------------------------------------------------------------------------------------------------------------------------------------------------------------------------------------------------------------------------------------------------------------------------------------------------------------------------------------------------------------------------------------------------------------------------------------------------------------------------------------------------------------------------------------------------------------------------------------------------------------------------------------------------------------------------------------------------------------------------------------------------------------------------------------------------------------------------------------------------------------------------------------------------------------------------------------------------------------------------------------------------------------------------------------------------------------------------------------------------------------------------------------------------------------------------------------------------------------------------------------------------------------------------------------------------------------------------------------------------------------------------------------------------------------------------------------------------------------------------------------------------------------------------------------------------------------------------------------------------------------------------------------------------------------------------------------------------------------------------------------------------------------------------------------------------------------------------------------------------------------------------------------------------------------------------------------------------------------------------------------------------------------------------------------------------------------------------------------------------------------------------------------------------------------------------------------------------------------------------------------------------------|
|  |  |  | GO1,SLC8A1,MARCHF1,ABCG8,MAP4K4,HIVEP2,ABCD2,BMPR1B,ZNF717,RAB8B,PDZRN4,PAK3,PDE1A,ZNF257,TTL7,RANBP2,ITPKB,TRPC5,PDE10A,UBE2E2,HHAT,RNLS,DNM3,CUBN,SCP2,SYN3,PHF21B,PRKCZ,MAN2A2,RYR3,TAF15,MSH6,RAB27B,CO L27A1,ZSWIM6,FER1L6,MBNL2,ADAMTS17,ABCA5,PHF19,GALN T14,PDXDC1,EBF2,PPM1L,RIPK4,ZKSCAN5,MAPK1,MGAT5,CAD PS2,KCNJ1,ABCD3,DNAH14,TRPC7,KMT2E,PAPPA,PCGF5,SYT1 0,ZNRF3,DNAJC21,CA5A,XXYLT1,ABLIM1,UBE20,ANKFY1,RNF 17,GALNT16,PI4K2B,RNGTT,EWSR1,FAT3,MICU1,ZNF735,CHD 6,STK38,CHN1,MYLK3,ACSBG1,LIMCH1,MBNL1,EFEMP1,TLL1,ZNF684,DCAF1,ZFAND3,TLK1,HIVEP1,EFCAB8,CDH7,MOB3B,K LF15,PPARA,PIIP5K1,ERMP1,NR5A2,ADAMTS3,ARAP2,PAK5,T RERF1,PCDH11Y,PDZRN3,DAPK1,NAV3,ACSM2B,AGO2,STK32B, PHC3,MAGI1,ALPK2,DNAH11,TBC1D9,RAB22A,GATAD2B,CPE,D YSF,ADGRV1,ZNF846,MELK,RYR2,ZNF606,CLPX,AIF1L,SMARC A4,CDH11,LDB3,FABP7,PARD3,MAPKAP1,EFTUD2,PIAS1,UBE2 R2,BLK,EBF1,OLA1,DST,ATRX,NUAK1,XIRP2,ABL1,AGPS,HDA C4,SLC1A1,PRKAA1,CRTAC1,DROSHA,TTL5,L3MBTL3,APLF,A DAMTS14,MAST4,DNAH5,GUCY1A2,CDH18,SLFN11,RAP1A,GLIS 1,ACSS3,MORC1,MYO10,ZNHIT6,CAMK4,BAZ2A,PLEKHA8,CPSF 3,ZC3HAV1,CDHR3,TGM1,PEAK1,LATS2,CLIP1,EFCAB6,PAH,A TP11C,ZNF438,DHX40,ABCB7,ZBTB16,MUSK,GALNTL6,ZNF675 ,ACTR3C,SMARCA1,ABCC12,SETDB2,PRKCE,FOXK2,PGM5,ASA P2,METAP1D,WNK2,ESRRG,ZNF718,DGKB,USP33,FBN2,ZNF831 ,EGF,ALPK3,ABCC9,P2RX6,TRIO,PDE3A,EXT1,STXBP6,NLRP1 3,LNPEP,LIMD1,ADAMTS2,RPS6KA3,MARCHF8,ATP8A2,SCG5,M TMR3,TRIM5,RFC1,HTR2C,ATP8A1,ZCCHC7,LTBP1,STK38L,ZF YVE9,GALNT10,KDM7A,ABCC4,PRMT8,HTR2A,KIAA0232,FANCM ,CYBRD1,CYP4A11,MATN2,FARS2,ETF2F2,STAC,TAFA3,MARK2 ,GMPR,EBF3,ALPL,ZNF33B,LPP,FHL2,MSH2,MPPED2,GNAL,EPH A6,ZNF397,ATL1,HIPK3,KCND2,ABCA10,GRK3,CPXM2,NOS2,A FG3L2,CPNE4,STK10,MNAT1,ADAM12,MYLK2,XYLT1,GBP6,BCL 11B,VPS41,FOLH1,F5,ECE1,ZIM3,STK32A,AK8,TRPS1,TMEM1 63,PLCE1,HIP1,XPNPEP1,GSR,PCDH9,VAV1,CYP4Z1,CDH20,R UFY2,MYT1L,ZNF160,EGFLAM,PACSIN2,TARS3,MTHFD1L,SNX3 ,ZNF367,PDLIM5,CEPT1,AQR,ZBTB2,GALNT13,EXD3,DNER,BL M,NRK,MAGI3,LIN54,LRP1B,ADCY10,ZNF121,RC3H2,MYLK4,A TP9A,CDC42BPB,DSE,VRK1,GNAL1,ZC3H14,GFI1B,MYRIP,HPC AL1,BMP2K,RNF38,ASXL3,PDE6C,POLR3A,RELN,GNAL,ZNF106 ,ZNF567,CLVS1,TRAF3,ZNF462,UNC13B,ZNF875,DSTYK,UIMC 1,B4GALT6,PFKFB4,PLS1,IKZF2,SEC23B,NIN,DNAH8,TRIT1 ,GADL1,SMARCA2,ARSJ,GLI3,CGAS,SMOC2,PCP4,IDE,MCTP2,K IF21A,KIF15,PRDM10,RERGL,ZFYVE26,ZNF431,RERE,ANKMY1 ,BTAF1,MYL1,PEX6,ZNF618,NEK10,MOB1B,ATF2,CYLD,UMODL 1,ADARB2,MX1,ZMAT4,CLVS2,ANTXR1,HIVEP3,COL5A1,ITGA9 ,CFTR,NELL1,ME2,ZZEF1,ATP10B,UBR1,MYT1,SMPDL3A,MAP4 K3,YPEL1,RORB,TADA2A,ZNF208,SELENON,MYO3A,UBE2E1,RE PS1,PRKN,AGMO,ZNF608,SH3PXD2A,ZFAND4,CDC42BPA,SP110 ,MAPK10,PCDH15,ZNF541,DPF3,HEPHL1,GRIN2A,TXNRD2,TRP M6,CDH23,LALBA,PRKCH,HUNK,FRMPD4,PEPD,RACGAP1,NLRC5 ,ZNF627,ACO1,CNOT6L,MKNK1,DMC1,FBLN5,ZFP90,AOPEP,PD B6A,ZNF124,VAV3,ENPP3,PLAGL1,KCND3,HAAO,FAH,ITSN2,M OK,ARHGEF28,RALB,NPAS2,MYO1D,SEC24D,PPA2,CA1,ROCK1 ,LYN,ZNF780B,ZNF169,PLEKHB2,KIF11,DTX1,TENM2,OVOL2,Z BTB33,ADA2,CHKA,PLCB4,MMP16,PRUNE2,ZFH33,FANCL,ZNF4 4,RRAGD,CRACR2A,RNF152,BAZ1A,CASZ1,OTUD7A,INSR,NEK6 ,HECTD1,DDHD1,ZNF292,ADAMTS19,DPYD,SNAIL,ASH1L,SLAH 2,RPH3A,ZBTB80S,COX5A,ABCA4,TRABD2B,RXRG,SP3,ERN2,Z NF879,MBTPS2,TRIM58,ZNF804B,NSD2,FYCO1,ESYT2,LTN1,S AMHD1,ENPP1,ENTPD5,UTRN,RASGRP1,PAMR1,CDH26,DZANK1, PDXNL,UCK2,CSNK2A1,ZNF385D,HCN1,PRKG1,GRIN2B,INO80 ,ETNPPL,KIF21B,SMAD5,ABCG1,MARCHF11,SLC40A1,HADHA,CA BYR,PSAP,MICALL2,KDM6A,ROR2,ZNF521,FAT1,HGD,LMX1A,A CTR2,CALN1,RIOK1,CLSTN2,SDF4,PRKAA2,DIRAS2,RNF182,E RO1B,PHF20L1,PLA2G4A,RAB12,SNRPC,KIFC1,IQGAP1,ZBTB7 C,MORC2,LASP1,THNSL2,NRXN1,HIPK1,ZNF234,CISD1,CIB4, |
|--|--|--|-------------------------------------------------------------------------------------------------------------------------------------------------------------------------------------------------------------------------------------------------------------------------------------------------------------------------------------------------------------------------------------------------------------------------------------------------------------------------------------------------------------------------------------------------------------------------------------------------------------------------------------------------------------------------------------------------------------------------------------------------------------------------------------------------------------------------------------------------------------------------------------------------------------------------------------------------------------------------------------------------------------------------------------------------------------------------------------------------------------------------------------------------------------------------------------------------------------------------------------------------------------------------------------------------------------------------------------------------------------------------------------------------------------------------------------------------------------------------------------------------------------------------------------------------------------------------------------------------------------------------------------------------------------------------------------------------------------------------------------------------------------------------------------------------------------------------------------------------------------------------------------------------------------------------------------------------------------------------------------------------------------------------------------------------------------------------------------------------------------------------------------------------------------------------------------------------------------------------------------------------------------------------------------------------------------------------------------------------------------------------------------------------------------------------------------------------------------------------------------------------------------------------------------------------------------------------------------------------------------------------------------------------------------------------------------------------------------------------------------------------------------------------------------------------------------------------------------------------------------------------------------------------------------------------------------------------------------------------------------------------------------------------------------------------------------------------------------------------------------------------------------------------------------------------------------------------------------------------------------------------------------------------------------------------------------------------------------------------------------------------------------------------------------------------------------------------------------------------------------------------------------------------------------------------------------------|

|            |                   |                        |                                                                                                                                                                                                                                                                                                                                                                                                                                                                                                                                                                                                                                                                                                                                                                                                                                                                                                                                                                                                                                                                                                                                                                                                                                                                                                                                                                                                                                                                                                                                                                                                                                                                                                                                                                                                                                                                                                                                                                                                                                                                                                                                                                                                                                                                                                                                                                                                                                                                                                      |
|------------|-------------------|------------------------|------------------------------------------------------------------------------------------------------------------------------------------------------------------------------------------------------------------------------------------------------------------------------------------------------------------------------------------------------------------------------------------------------------------------------------------------------------------------------------------------------------------------------------------------------------------------------------------------------------------------------------------------------------------------------------------------------------------------------------------------------------------------------------------------------------------------------------------------------------------------------------------------------------------------------------------------------------------------------------------------------------------------------------------------------------------------------------------------------------------------------------------------------------------------------------------------------------------------------------------------------------------------------------------------------------------------------------------------------------------------------------------------------------------------------------------------------------------------------------------------------------------------------------------------------------------------------------------------------------------------------------------------------------------------------------------------------------------------------------------------------------------------------------------------------------------------------------------------------------------------------------------------------------------------------------------------------------------------------------------------------------------------------------------------------------------------------------------------------------------------------------------------------------------------------------------------------------------------------------------------------------------------------------------------------------------------------------------------------------------------------------------------------------------------------------------------------------------------------------------------------|
|            |                   |                        | <p>ZNF518A,DGKK,SNAP91,CYP4F22,FICD,CENPE,PEG10,LMX1B,TUBB6,AKT3,JAK2,ADAM28,FSTL1,ZBTB38,MPPE1,BPNT1,SVEP1,PTGS1,ZNF287,CELSR2,ZNF449,PRSS2,CREBBP,MELTF,TNKS,ARL11,STAH3,TRPV5,ADAMTS5,PRKCB,GOT2,KIF6,ABCC8,MIPEP,PCDH11X,ANXA4,OVCH1,MT1HL1,CACNA1E,ZC3H15,RFC2,ZNF354C,ZBTB21,SMPD4,NRBP1,ITGA6,ATP2B1,GAP43,IARS2,CLCA4,ASS1,CNDP2,GTSEF1L,AGAP9,ADGRE3,SAR1A,ADCY9,EML1,MAST2,ZNF528,ZNF611,EFHD2,ZBTB49,EXT2,EXOC1,PD2,SLC6A1,SDS,ZCCHC14,NR2C1,MAP2K6,DGKG,VAT1L,MARCFH6,GATAD1,MYO18B,CCBE1,PARK7,ADAMTS18,MAPK8,ITGA4,TOP3A,ZSCAN30,UBE2J2,PLA2G12B,MTF2,RAPGEF4,FOX2,HFM1,HMCN1,MYH13,ATP13A3,DHTKD1,ZSCAN5C,UBE2QL1,ACACA,ST8SIA4,ARL4C,EFHB,ZNF613,RXRA,MAP3K5,MAP3K4,TRIM43B,S100B,PRDM13,TRIM43,ERI1,SUMF1,EFCAB14,ZNF112,CHAMP1,PKN2,PDE2A,RAB38,DBF4B,SDCBP,DSG1,NSMCE1,ZNF813,ZBTB25,PASK,FGR,PPP2R3A,TRIM23,ATP6V1B2,TOP1,MLLT10,C2,RNF8,EPHA4,PIIP5K2,MECOM,DNMT3L,NTRK2,ACSM2A,LHX9,ADAMTS9,COLEC12,FRRS1,ZBTB10,TNNI1,PLEKHA3,POSTN,CREB5,EXTL3,TRPM7,IREB2,PTK2,MARK4,CDH5,TPH2,SCGN,APIP,SUSD1,UBE3A,PCDH8,DNAH10,PITPNC1,ZBTB20,FAT4,IMPA2,ZNF66,RUNX1,AMFR,NENF,POMT2,ZNF845,ZFYVE1,ASAP1,PLCZ1,EDIL3,DIDO1,GALNT18,HKDC1,ADAMTS16,ACOXL,MDN1,FYN,BUB1,KDM5A,MYL12B,NLRP14,ZNF705G,PPM1F,ARL13B,UHRF2,SCN8A,NCS1,COL18A1,GALNT17,CDH9,ALB,ATP9B,UGP2,ZFYVE28,MAPK9,STT3A,ROR1,GALNT2,TET1,CDH2,ITGA8,XRN2,PHLPP1,PLEKHA2,EPHB1,EYS,DDX10,ADCK1,ZNF705D,RPS6KA5,NRP1,FCHSD2,PRKCA,GBP4,NLRP4,RNF215,ITGA1,ZNF615,PCCA,KLF12,RNF138,RC3H1,POR,ZNF850,ZNF235,ABCA6,EFL1,MCC,ZNF738,BCR,TUT4,NRXN3,RERG,ZNF215,NLRP8,KIF16B,CDH12,PRIM2,SNRK,ARFGAP3,USP49,PGM2L1,FBLN1,STK36,MB,RAG1,ZMYM1,DNPEP,CYP4B1,RRAS2,GNA14,ZNF678,RABL2A,PRDM15,ZNF420,EPHB2,CSNK1G1,RNF11,EYA4,DPH6,MYO5B,CDK14,MET,CDH17,ZNF705B,CAMK1G,CDH13,USP32,NRAP,UNK,AIFM3,KALRN,ME3,ZNF704,SLC1A2,GNAS,MFHAS1,CA10,CPQ,TRIM9,DHX29,ASTN2,ZMYND8,RNF217,DNAH3,ZNF74,BPTF,AK3,ZMYND11,KMT2C,DDX6,UPRT,DNAH17,ABL2,MM26,NECAB1,EYA1,TTL11,SLIT2,CMPK1,CNOT7,KCNIP4,ESCO1,PLCL1,ERBB4,TRHDE,PRKCQ,ANTXR1,MYH15,MGMT,ZNF679,AK9,NOS1,SLC6A3,GLDC,CHD9,MTRX,VCAN,RAB27A,NSD1,EHMT1,SLIT3,DTNA,KIF13A,ESR1,DNAH9,MYO9B,KDM4B,CYP2C8,LOXL2,CACNA2D1,ORC4,PRLR,AGO3,LARS2,RAD51B,CAMK1D,CDKAL1,AK2,FER,ZNF302,EYA2,PITPNM3,INTS12,WDFY3,CHFR,ZNF721,JAZF1,ZNF578,ZNF891,SPOCK3,ZNF14,PHC2,AGAP1,ROCK2,PRDM1,RORA,NARS2,DMRT1,PPP1CB,RAB31,PDK1,HSPG2,TRIM2,ZFP30,KIF7,FSTL4,BARD1,CLCN5,PNPLA3,HSPA12A,STK3,ZNF423,PNPLA8,ZNF568,HNRNPU,CADPS,IGF1R,KCNAB1,PRKAG2,GLI2,THRB,AKAP13,MORC3,ATP10A,SEPTIN6,DNM1L</p> |
| GO:0046872 | metal ion binding | 2.0254286122048157e-18 | <p>NOTCH2,CACNA2D3,SPOCK1,FREM1,BNC2,MICU2,SMOC1,MYO9A,NLK,UNC13C,SCAPER,FTO,KSR1,AGBL1,ZNF236,PLCB1,ZNF536,TTC3,LIP1,ZFPM2,MICAL3,NUBPL,L3MBTL4,ITPR2,PDE4D,NME7,EPS15L1,KCNMA1,PRDM16,FBN1,LPCAT2,F13A1,GPHN,CDH8,PUDP,RIMS1,ZEB1,RARB,FGD4,GALNT1,ENPEP,RIMS2,ADGRE1,PCDH7,MCTP1,PJA2,PAPPA2,GLIS3,ANO6,ZNF880,EGLN3,MOCOS,SPON1,CPA6,ZMYM4,ZNF595,TSHZ3,SETD2,ZNF573,EFCAB2,KDM4C,NEK4,TSHZ2,ZNF280B,MACF1,PRKACB,NEK7,RNF220,HMCN2,ZNF407,MYOF,GNPTAB,CRB1,NSMCE2,BCL11A,CHSY1,CDH4,ATP2B2,LARGE1,RXFP1,PDE1C,ZFAND6,CYP2C9,ZNF648,ADAMTS6,ZNF382,AOAH,DGKI,SLC8A3,NELL2,PRKD1,ADSS2,CHSY3,RAPGEF2,LRP2,ARSB,CPS1,CPEB4,PRICKLE2,SMYD3,TYW1,HERC2,GRM7,KIF4A,ADAM10,HDAC9,ZHX3,APP,ADK,RPS6KA2,CACNA1C,KDM1B,ZNF600,SYT1,ACER2,ZNF723,PARN,ST18,PYGO1,SLC8A1,MARCHF1,ABCG8,HIVEP2,BMPR1B,ZNF717,PDZRN4,PAK3,PDE1A,ZNF257,TTL7,RANBP2,PDE10A,CUBN,PHF21B,PRKCZ,MAN2A2,RYR3,TAF15,MSH6,COL27A1,ZSWIM6,FER1L6,MBNL2,ADAMTS17,PHF19,GALNT14,EBF2,PPM1L,</p>                                                                                                                                                                                                                                                                                                                                                                                                                                                                                                                                                                                                                                                                                                                                                                                                                                                                                                                                                                                                                                                                                                                                                                                                                                                                                                                                                                                                                                                                                                                                         |



|  |  |  |                                                                                                                                                                                                                                                                                                                                                                                                                                                                                                                                                                                                                                                                                                                                                                                                                                                                                                                                                                                                                                                                                                                                                                                                                                                                                                                                                                                                                                                                                                                                                                                                                                                                                                                                                                                                                                                                                                                                                                                                                                                                                                                                                                                                                                                                                                                                                                                                                                                                                                                                                                                                                                                                                                                                                                                                                                                                                                                                                                                                                                                                                                                                                                                                                                                                                                                                                                                                                                                                                                                                                                                                                                                                                                                                                                                                                                                                                                                                                                                                                                                                     |
|--|--|--|---------------------------------------------------------------------------------------------------------------------------------------------------------------------------------------------------------------------------------------------------------------------------------------------------------------------------------------------------------------------------------------------------------------------------------------------------------------------------------------------------------------------------------------------------------------------------------------------------------------------------------------------------------------------------------------------------------------------------------------------------------------------------------------------------------------------------------------------------------------------------------------------------------------------------------------------------------------------------------------------------------------------------------------------------------------------------------------------------------------------------------------------------------------------------------------------------------------------------------------------------------------------------------------------------------------------------------------------------------------------------------------------------------------------------------------------------------------------------------------------------------------------------------------------------------------------------------------------------------------------------------------------------------------------------------------------------------------------------------------------------------------------------------------------------------------------------------------------------------------------------------------------------------------------------------------------------------------------------------------------------------------------------------------------------------------------------------------------------------------------------------------------------------------------------------------------------------------------------------------------------------------------------------------------------------------------------------------------------------------------------------------------------------------------------------------------------------------------------------------------------------------------------------------------------------------------------------------------------------------------------------------------------------------------------------------------------------------------------------------------------------------------------------------------------------------------------------------------------------------------------------------------------------------------------------------------------------------------------------------------------------------------------------------------------------------------------------------------------------------------------------------------------------------------------------------------------------------------------------------------------------------------------------------------------------------------------------------------------------------------------------------------------------------------------------------------------------------------------------------------------------------------------------------------------------------------------------------------------------------------------------------------------------------------------------------------------------------------------------------------------------------------------------------------------------------------------------------------------------------------------------------------------------------------------------------------------------------------------------------------------------------------------------------------------------------------|
|  |  |  | <p> ZKSCAN5, MGAT5, CADPS2, KMT2E, PAPPA, PCGF5, SYT10, ZNRF3, DNAJC21, CA5A, XXYL1, ABLIM1, ANKFY1, RNF17, GALNT16, EWSR1, FAT3, MICU1, ZNF735, STK38, CHN1, LIMCH1, MBNL1, EFEMP1, TLL1, ZNF684, ZFAND3, HIVEP1, EFCAB8, CDH7, MOB3B, KLF15, PPARA, ERMP1, NR5A2, ADAMTS3, ARAP2, TRERF1, PCDH11Y, PDZRN3, ACSM2B, AGO2, STK32B, PHC3, TBC1D9, GATAD2B, CPE, DYSF, ADGRV1, ZNF846, MELK, RYR2, ZNF606, CLPX, AIF1L, CDH11, LDB3, PIAS1, EBF1, OLA1, DST, ATRX, NUA1, XIRP2, ABL1, HDAC4, SLC1A1, PRKAA1, CRTAC1, DROSHA, TTLL5, L3MBTL3, APLF, ADAMTS14, MAST4, CDH18, GLIS1, MORC1, ZNHIT6, BAZ2A, CPSF3, ZC3HAV1, CDHR3, TGM1, LATS2, CLIP1, EFCAB6, PAH, ATP11C, ZNF438, ZBTB16, MUSK, GALNTL6, ZNF675, SETDB2, PRKCE, FOXK2, PGM5, ASAP2, METAP1D, ESRRG, ZNF718, DGKB, USP33, FBN2, ZNF831, EGF, PDE3A, EXT1, LNPEP, LIMD1, ADAMTS2, RPS6KA3, MARCHF8, ATP8A2, MTMR3, TRIM5, ATP8A1, ZCCHC7, LTBP1, STK38L, ZFYVE9, GALNT10, KDM7A, CYBRD1, CYP4A11, MATN2, STAC, TAF3, MARK2, GMPR, EBF3, ALPL, ZNF33B, LPP, FHL2, MSH2, MPPED2, GNAL, ZNF397, KCND2, CPXM2, NOS2, AFG3L2, CPNE4, MNAT1, ADAM12, XYLT1, BCL11B, VPS41, FOLH1, F5, ECE1, ZIM3, STK32A, TRPS1, TMEM163, PLCE1, XPNPEP1, PCDH9, VAV1, CYP4Z1, CDH20, RUFY2, MYT1L, ZNF160, EGFLAM, ZNF367, PDLIM5, CEPT1, ZBTB2, GALNT13, EXD3, DNER, BLM, LIN54, LRP1B, ADCY10, ZNF121, RC3H2, ATP9A, CDC42BPB, DSE, GNAI1, ZC3H14, GFI1B, MYRIP, HPCAL1, RNF38, ASXL3, PDE6C, POLR3A, RELN, GNAQ, ZNF106, ZNF567, TRAF3, ZNF462, UNC13B, ZNF875, UIMC1, B4GALT6, PLS1, IKZF2, SEC23B, NIN, TRIT1, ARSJ, GLI3, CGAS, SMOC2, PCP4, IDE, MCTP2, PRDM10, ZFYVE26, ZNF431, RERE, ANKMY1, MYL1, ZNF618, NEK10, MOB1B, ATF2, CYLD, UMODL1, ADARB2, ZMAT4, ANTXRL, HIVEP3, COL5A1, ITGA9, NELL1, ME2, ZZEF1, ATP10B, UBR1, MYT1, SMPDL3A, YPEL1, RORB, TADA2A, ZNF208, SELENON, REPS1, PRKN, AGMO, ZNF608, ZFAND4, CDC42BPA, SP110, PCDH15, ZNF541, DPF3, HEPHL1, GRIN2A, TRPM6, CDH23, LALBA, PRKCH, PEPD, RACGAP1, ZNF627, ACO1, CNOT6L, MKNK1, FBLN5, ZFP90, AOEPEP, PDE6A, ZNF124, VAV3, ENPP3, PLAGL1, KCND3, HAAO, FAH, ITS2, MOK, ARHGAP28, NPAS2, SEC24D, PPA2, CA1, ROCK1, ZNF780B, ZNF169, DTX1, TENM2, OVOL2, ZBTB33, ADA2, PLCB4, MMP16, PRUNE2, ZFH3, FANCL, ZNF44, CRACR2A, RNF152, BAZ1A, CASZ1, OTUD7A, NEK6, HECTD1, DDHD1, ZNF292, ADAMTS19, DPYD, SNAI2, ASH1L, SIAH2, RP3A, ZBTB80S, COX5A, TRABD2B, RXRG, SP3, ERN2, ZNF879, MBTPS2, TRIM58, ZNF804B, NSD2, FYCO1, ESYT2, LTN1, SAMHD1, ENPP1, UTRN, RASGRP1, PAMR1, CDH26, DZANK1, PXDNL, ZNF385D, GRIN2B, SMAD5, MARCHF11, SLC40A1, CABYR, MICALL2, KDM6A, ROR2, ZNF521, FAT1, HGD, LMX1A, CALN1, RIOK1, CLSTN2, SDF4, PRKAA2, RNF182, PHF20L1, PLA2G4A, SNRPC, IQGAP1, ZBTB7C, MORC2, LASP1, NRXN1, ZNF234, CISD1, CIB4, ZNF518A, DGKK, CYP4F22, PEG10, LMX1B, JAK2, ADAM28, FSTL1, ZBTB38, MPPE1, BPNT1, SVEP1, PTGS1, ZNF287, CELSR2, ZNF449, PRSS2, CREBBF, MELTF, TNKS, SIAH3, TRPV5, ADAMTS5, PRKCB, MIPEP, PCDH11X, ANXA4, OVCH1, MT1HL1, CACNA1E, ZC3H15, ZNF354C, ZBTB21, SMPD4, ITGA6, ATP2B1, CLCA4, CNDP2, GTSF1L, AGAP9, ADGRE3, ADCY9, EMIL1, MAST2, ZNF528, ZNF611, EFHD2, ZBTB49, EXT2, PDP2, SLC6A1, ZCCHC14, NR2C1, DGKG, VAT1L, MARCHF6, GATAD1, CCB1, PARK7, ADAMTS18, ITGA4, TOP3A, ZSCAN30, PLA2G12B, MTF2, FDXP2, HMCN1, ATP13A3, ZSCAN5C, ACACA, EFHB, ZNF613, RXRA, MAP3K5, MAP3K4, TRIM43B, S100B, PRDM13, TRIM43, ERI1, SUMF1, EFCAB14, ZNF112, CHAMP1, PDE2A, DBF4B, DSG1, NSMCE1, ZNF813, ZBTB25, PPP2R3A, TRIM23, MLLT10, C2, RNF8, MECOM, DNMT3L, ACSM2A, LHX9, ADAMTS9, COLEC12, FRRS1, ZBTB10, TNNT1, POSTN, CREB5, EXTL3, TRPM7, IREB2, CDH5, TPH2, SCGN, APIP, SUSD1, UBE3A, PCDH8, ZBTB20, FAT4, IMPA2, ZNF66, RUNX1, AMFR, NENF, POMT2, ZNF845, ZFYVE1, ASAP1, PLCZ1, EDIL3, DIDO1, GALNT18, ADAMTS16, FYN, KDM5A, MYL12B, ZNF705G, PPM1F, UHRF2, NCS1, COL18A1, GALNT17, CDH9, ALB, ATP9B, UGP2, ZFYVE28, STT3A, GALNT2, TET1, CDH2, ITGA8, XRN2, PHLPP1, EYS, ZNF705D, RPS6KA5, NRP1, PRKCA, RNF215, ITGA1, ZNF615, PCCA, KLF12, RNF138, RC3H1, ZNF850, ZNF235, MCC, ZNF738, TUT4, NRXN3, ZNF215, </p> |
|--|--|--|---------------------------------------------------------------------------------------------------------------------------------------------------------------------------------------------------------------------------------------------------------------------------------------------------------------------------------------------------------------------------------------------------------------------------------------------------------------------------------------------------------------------------------------------------------------------------------------------------------------------------------------------------------------------------------------------------------------------------------------------------------------------------------------------------------------------------------------------------------------------------------------------------------------------------------------------------------------------------------------------------------------------------------------------------------------------------------------------------------------------------------------------------------------------------------------------------------------------------------------------------------------------------------------------------------------------------------------------------------------------------------------------------------------------------------------------------------------------------------------------------------------------------------------------------------------------------------------------------------------------------------------------------------------------------------------------------------------------------------------------------------------------------------------------------------------------------------------------------------------------------------------------------------------------------------------------------------------------------------------------------------------------------------------------------------------------------------------------------------------------------------------------------------------------------------------------------------------------------------------------------------------------------------------------------------------------------------------------------------------------------------------------------------------------------------------------------------------------------------------------------------------------------------------------------------------------------------------------------------------------------------------------------------------------------------------------------------------------------------------------------------------------------------------------------------------------------------------------------------------------------------------------------------------------------------------------------------------------------------------------------------------------------------------------------------------------------------------------------------------------------------------------------------------------------------------------------------------------------------------------------------------------------------------------------------------------------------------------------------------------------------------------------------------------------------------------------------------------------------------------------------------------------------------------------------------------------------------------------------------------------------------------------------------------------------------------------------------------------------------------------------------------------------------------------------------------------------------------------------------------------------------------------------------------------------------------------------------------------------------------------------------------------------------------------------------------|

|            |                |                        |                                                                                                                                                                                                                                                                                                                                                                                                                                                                                                                                                                                                                                                                                                                                                                                                                                                                                                                                                                                                                                                                                                                                                                                                                                                                                                                                                                                                                                                                                                                                                                                                                                                                                                                                                                                                                                                                                                                                                                                                                                                                                                                                                                                                                                                                                                                                                                                                                                                                                                                                                                                                                                                                                                                                                                                                                                                                                                                                                                                                                                                                                                                                                                                                                                                                    |
|------------|----------------|------------------------|--------------------------------------------------------------------------------------------------------------------------------------------------------------------------------------------------------------------------------------------------------------------------------------------------------------------------------------------------------------------------------------------------------------------------------------------------------------------------------------------------------------------------------------------------------------------------------------------------------------------------------------------------------------------------------------------------------------------------------------------------------------------------------------------------------------------------------------------------------------------------------------------------------------------------------------------------------------------------------------------------------------------------------------------------------------------------------------------------------------------------------------------------------------------------------------------------------------------------------------------------------------------------------------------------------------------------------------------------------------------------------------------------------------------------------------------------------------------------------------------------------------------------------------------------------------------------------------------------------------------------------------------------------------------------------------------------------------------------------------------------------------------------------------------------------------------------------------------------------------------------------------------------------------------------------------------------------------------------------------------------------------------------------------------------------------------------------------------------------------------------------------------------------------------------------------------------------------------------------------------------------------------------------------------------------------------------------------------------------------------------------------------------------------------------------------------------------------------------------------------------------------------------------------------------------------------------------------------------------------------------------------------------------------------------------------------------------------------------------------------------------------------------------------------------------------------------------------------------------------------------------------------------------------------------------------------------------------------------------------------------------------------------------------------------------------------------------------------------------------------------------------------------------------------------------------------------------------------------------------------------------------------|
|            |                |                        | CDH12, PRIM2, SNRK, ARFGAP3, USP49, PGM2L1, FBLN1, STK36, MB, RAG1, ZMYM1, DNPEP, CYP4B1, GNA14, ZNF678, PRDM15, ZNF420, RNF11, EYA4, CDH17, ZNF705B, CDH13, USP32, NRAP, UNK, AIFM3, KALRN, ME3, ZNF704, SLC1A2, GNAS, CA10, CPQ, TRIM9, ASTN2, ZMYND8, RNF217, ZNF74, BPTF, ZMYND11, KMT2C, ABL2, MMP26, NECAB1, EYA1, TTLL11, SLIT2, CNOT7, KCNIP4, ESCO1, TRHDE, PRKCQ, ANTXR1, MGMT, ZNF679, NOS1, SLC6A3, VCAN, NSD1, EHMT1, SLIT3, DTNA, ESR1, MYO9B, KDM4B, CYP2C8, LOXL2, CACNA2D1, PRLR, AGO3, CDKAL1, ZNF302, EYA2, PITPNM3, INTS12, WDFY3, CHFR, ZNF721, JAZF1, ZNF578, ZNF891, SPOCK3, ZNF14, PHC2, AGAP1, ROCK2, PRDM1, RORA, DMRT1, PPP1CB, HSPG2, TRIM2, ZFP30, FSTL4, BARD1, STK3, ZNF423, ZNF568, CADPS, GLI2, THRB, AKAP13, MORC3, ATP10A                                                                                                                                                                                                                                                                                                                                                                                                                                                                                                                                                                                                                                                                                                                                                                                                                                                                                                                                                                                                                                                                                                                                                                                                                                                                                                                                                                                                                                                                                                                                                                                                                                                                                                                                                                                                                                                                                                                                                                                                                                                                                                                                                                                                                                                                                                                                                                                                                                                                                                       |
| GO:0043169 | cation binding | 1.3647414640918938e-17 | NOTCH2, CACNA2D3, SPOCK1, FREM1, BNC2, MICU2, SMOC1, MYO9A, NLK, UNC13C, SCAPER, FTO, KSR1, AGBL1, ZNF236, PLCB1, ZNF536, TTC3, LIPI, ZFPM2, MICAL3, NUBPL, L3MBTL4, ITPR2, PDE4D, NME7, EPS15L1, KCNMA1, PRDM16, FBN1, LPCAT2, F13A1, GPHN, CDH8, CHRNA7, PUDP, RIMS1, ZEB1, RARB, FGD4, GALNT1, ENPEP, RIMS2, ADGRE1, PCDH7, MCTP1, PJA2, PAPPA2, GLIS3, ANO6, ZNF880, EGLN3, MOCOS, SPON1, CPA6, ZMYM4, ZNF595, TSHZ3, SETD2, ZNF573, EFCAB2, KDM4C, NEK4, TSHZ2, ZNF280B, MACF1, PRKACB, NEK7, RNF220, HMCN2, ZNF407, MYOF, GNPTAB, CRB1, NSMCE2, BCL11A, CHSY1, CDH4, ATP2B2, LARGE1, RXFP1, PDE1C, ZFAND6, CYP2C9, ZNF648, ADAMTS6, ZNF382, AOAH, DGKI, SLCA8A3, NELL2, PRKD1, CHRM3, ADSS2, CHSY3, RAPGEF2, LRP2, ARSB, CPS1, CPEB4, PRICKLE2, SMYD3, TYW1, HERC2, GRM7, KIF4A, ADAM10, HDAC9, ZHX3, APP, ADK, RPS6KA2, CACNA1C, KDM1B, ZNF600, SYT1, ACER2, ZNF723, PARN, ST18, PYGO1, SLC8A1, MARCHF1, ABCG8, HIVEP2, BMPR1B, ZNF717, PDZRN4, PAK3, PDE1A, ZNF257, TTLL7, RANBP2, PDE10A, CUBN, PHF21B, PRKCZ, MAN2A2, RYR3, TAF15, MSH6, COL27A1, ZSWIM6, FER1L6, MBNL2, ADAMTS17, PHF19, GALNT14, EBF2, PPM1L, ZKSCAN5, MGAT5, CADPS2, KMT2E, PAPPA, PCGF5, SYT10, ZNRF3, DNAJC21, CA5A, XXYL1, ABLIM1, ANKFY1, RNF17, GALNT16, EWSR1, FAT3, MICU1, ZNF735, STK38, CHN1, LIMCH1, MBNL1, EFEMP1, TLL1, ZNF684, ZFAND3, HIVEP1, EFCAB8, CDH7, MOB3B, KLF15, PPARA, ERMP1, NR5A2, ADAMTS3, ARAP2, TRERF1, PCDH11Y, PDZRN3, ACSM2B, AGO2, STK32B, PHC3, TBC1D9, GATA2B, CPE, DYSF, ADGRV1, ZNF846, MELK, RYR2, ZNF606, CLPX, AIF1L, CDH11, LDB3, PIAS1, EBF1, OLA1, DST, ATRX, NUA1, XIRP2, ABL1, HDAC4, SLC1A1, PRKAA1, CRTAC1, DROSHA, TTLL5, L3MBTL3, APLF, ADAMTS14, MAST4, CDH18, GLIS1, MORC1, ZNHIT6, BAZ2A, CPSF3, ZC3HAV1, CDHR3, TGM1, LATS2, CLIP1, EFCAB6, PAH, ATP11C, ZNF438, ZBTB16, MUSK, GALNTL6, ZNF675, SETDB2, PRKCE, FOXK2, PGM5, ASAP2, METAP1D, ESRRG, ZNF718, DGKB, USP33, FBN2, ZNF831, EGF, PDE3A, EXT1, LNPEP, LIMD1, ADAMTS2, RPS6KA3, MARCHF8, ATP8A2, MTMR3, TRIM5, HTR2C, ATP8A1, ZCCHC7, LTBP1, STK38L, ZFYVE9, GALNT10, KDM7A, PRMT8, HTR2A, CYBRD1, CYP4A11, MATN2, STAC, TAF3, MARK2, GMPR, EBF3, ALPL, ZNF33B, LPP, FHL2, MSH2, MPPED2, GNAL, ZNF397, KCND2, CPXM2, NOS2, AFG3L2, CPNE4, MNAT1, ADAM12, XYLT1, BCL11B, VPS41, FOLH1, F5, ECE1, ZIM3, STK32A, AK8, TRPS1, TMEM163, PLCE1, XPNPEP1, PCDH9, VAV1, CYP4Z1, CDH20, RUFY2, MYT1L, ZNF160, EGFLAM, ZNF367, PDLIM5, CEPT1, ZBTB2, GALNT13, EXD3, DNER, BLM, LIN54, LRP1B, ADCY10, ZNF121, RC3H2, ATP9A, CDC42BPB, DSE, GNAI1, ZC3H14, GFI1B, MYRIP, HPCAL1, RNF38, ASXL3, PDE6C, P OLR3A, RELN, GNAQ, ZNF106, ZNF567, TRAF3, ZNF462, UNC13B, ZNF875, UIMC1, B4GALT6, PLS1, IKZF2, SEC23B, NIN, TRIT1, ARSJ, GLI3, CGAS, SMOC2, PCP4, IDE, MCTP2, PRDM10, ZFYVE26, ZNF431, RERE, ANKMY1, MYL1, ZNF618, NEK10, MOB1B, ATF2, CYLD, UMODL1, ADARB2, ZMAT4, ANTXRL, HIVEP3, COL5A1, ITGA9, NELL1, ME2, ZZEF1, ATP10B, UBR1, MYT1, SMPDL3A, YPEL1, RORB, TADA2A, ZNF208, SELENON, REPS1, PRKN, AGMO, ZNF608, ZFAND4, CDC42BPA, SP110, PCDH15, ZNF541, DPF3, HEPHL1, GRIN2A, TRPM6, CDH23, LALBA, PRKCH, PEPD, RACGAP1, ZNF627, ACOL1, CNOT6L, MKNK1, FBLN5, ZFP90, AOPEP, PDE6A, ZNF124, VAV3, ENPP3, PLAGL1, KCND3, HAAO, FAH, ITS2, MOK, ARHGEF28, NPAS2, SEC24D, P |

|            |                              |                       |                                                                                                                                                                                                                                                                                                                                                                                                                                                                                                                                                                                                                                                                                                                                                                                                                                                                                                                                                                                                                                                                                                                                                                                                                                                                                                                                                                                                                                                                                                                                                                                                                                                                                                                                                                                                                                                                                                                                                                                                                                                                                                                                                                                                                                                                                                                                                                       |
|------------|------------------------------|-----------------------|-----------------------------------------------------------------------------------------------------------------------------------------------------------------------------------------------------------------------------------------------------------------------------------------------------------------------------------------------------------------------------------------------------------------------------------------------------------------------------------------------------------------------------------------------------------------------------------------------------------------------------------------------------------------------------------------------------------------------------------------------------------------------------------------------------------------------------------------------------------------------------------------------------------------------------------------------------------------------------------------------------------------------------------------------------------------------------------------------------------------------------------------------------------------------------------------------------------------------------------------------------------------------------------------------------------------------------------------------------------------------------------------------------------------------------------------------------------------------------------------------------------------------------------------------------------------------------------------------------------------------------------------------------------------------------------------------------------------------------------------------------------------------------------------------------------------------------------------------------------------------------------------------------------------------------------------------------------------------------------------------------------------------------------------------------------------------------------------------------------------------------------------------------------------------------------------------------------------------------------------------------------------------------------------------------------------------------------------------------------------------|
|            |                              |                       | <p> PA2,CA1,ROCK1,ZNF780B,ZNF169,DTX1,TENM2,OVOL2,ZBTB33,ADA2,PLCB4,MMP16,PRUNE2,ZFH3,FANCL,ZNF44,CRACR2A,RNF152,BAZ1A,CASZ1,OTUD7A,NEK6,HECTD1,DDHD1,ZNF292,ADAMTS19,DPYD,SNAT2,ASH1L,STAH2,RPH3A,ZBTB80S,COX5A,TRABD2B,RXRG,SP3,ERN2,ZNF879,MBTPS2,TRIM58,ZNF804B,NSD2,FYCO1,ESYT2,LTN1,SAMHD1,ENPP1,UTRN,RASGRP1,PAMR1,CDH26,DZANK1,PXDNL,ZNF385D,GRIN2B,SMAD5,MARCHF11,SLC40A1,CABYR,MICALL2,KDM6A,ROR2,ZNF521,FAT1,HGD,LMX1A,CALN1,RIOK1,CLSTN2,SDF4,PRKAA2,RNF182,PHF20L1,PLA2G4A,SNRPC,IQGAP1,ZBTB7C,MORC2,LASP1,THNSL2,NRXN1,ZNF234,CISD1,CIB4,ZNF518A,DGKK,CYP4F22,PEG10,LMX1B,JAK2,ADAM28,FSTL1,ZBTB38,MPPE1,BPNT1,SVEP1,PTGS1,ZNF287,CELSR2,ZNF449,PRSS2,CREBBP,MELTF,TNKS,STAH3,TRPV5,ADAMTS5,PRKCB,MIPEP,PCDH11X,ANXA4,OVCH1,MT1HL1,CACNA1E,ZC3H15,ZNF354C,ZBTB21,SMPD4,ITGA6,ATP2B1,CLCA4,CNDP2,GTSF1L,AGAP9,ADGRE3,ADCY9,EML1,MAST2,ZNF528,ZNF611,EFHD2,ZBTB49,EXT2,PDP2,SLC6A1,ZCCHC14,NR2C1,DGKG,VAT1L,MARCHF6,GATAD1,CCBE1,PARK7,ADAMTS18,ITGA4,TP3A,ZSCAN30,PLA2G12B,MTF2,FOXP3,HMCN1,ATP13A3,DHTKD1,ZSCAN5C,ACACA,EFHB,ZNF613,RXRA,MAP3K5,MAP3K4,TRIM43B,S100B,PRDM13,TRIM43,ERI1,SUMF1,EFCAB14,ZNF112,CHAMP1,PDE2A,DBF4B,DSG1,NSMCE1,ZNF813,ZBTB25,PPP2R3A,TRIM23,MLLT10,C2,RNF8,MECOM,DNMT3L,ACSM2A,LHX9,ADAMTS9,COLEC12,FRRS1,ZBTB10,TNNI1,POSTN,CREB5,EXTL3,TRPM7,IREB2,CDH5,TPH2,SCGN,APIP,SUSD1,UBE3A,PCDH8,ZBTB20,FAT4,IMPA2,ZNF66,RUNX1,AMFR,NENF,POMT2,ZNF845,ZFYVE1,ASAP1,PLCZ1,EDIL3,DIDO1,GALNT18,ADAMTS16,FYN,KDM5A,MYL12B,ZNF705G,PPM1F,UHRF2,NCS1,COL18A1,GALNT17,CDH9,ALB,ATP9B,UGP2,ZFYVE28,STT3A,GALNT2,TET1,CDH2,ITGA8,XRN2,PHLPP1,EYS,ZNF705D,RPS6KA5,NRP1,PRKCA,RNF215,ITGA1,ZNF615,PCCA,KLF12,RNF138,RC3H1,ZNF850,ZNF235,MCC,ZNF738,TUT4,NRXN3,ZNF215,CDH12,PRIM2,SNRK,ARFGAP3,USP49,PGM2L1,FBLN1,STK36,MB,RAG1,ZMYM1,DNPEP,CYP4B1,GNA14,ZNF678,PRDM15,ZNF420,RNF11,EYA4,CDH17,ZNF705B,CDH13,USP32,NRAP,UNK,AIFM3,KALRN,ME3,ZNF704,SLC1A2,GNAS,CA10,CPQ,TRIM9,ASTN2,ZMYND8,RNF217,ZNF74,BPTF,ZMYND11,KMT2C,ABL2,MMP26,NECAB1,EYA1,TTLL11,SLIT2,CNOT7,KCNIP4,ESCO1,TRHDE,PRKCQ,ANTXR1,MGMT,ZNF679,NOS1,SLC6A3,GLDC,VCAN,NSD1,EHMT1,SLIT3,DTNA,ESR1,MYO9B,KDM4B,CYP2C8,LOXL2,CACNA2D1,PRLR,AGO3,CDKAL1,ZNF302,EYA2,PTPNM3,INTS12,WDFY3,CHFR,ZNF721,JAZF1,ZNF578,ZNF891,SPOCK3,ZNF14,PHC2,AGAP1,ROCK2,PRDM1,RORA,DMRT1,PPP1CB,HSPG2,TRIM2,ZFP30,FSTL4,BARD1,STK3,ZNF423,ZNF568,CADPS,PRKAG2,GLI2,THRB,AKAP13,MORC3,ATP10A </p> |
| GO:0008092 | cytoskeletal protein binding | 2.290700930554225e-12 | <p> NEBL,MYO9A,AGBL1,MX2,SVIL,TLN2,MICAL3,RDX,RP1,RALA,MYO5A,KCNMA1,DCDC1,SPIRE1,FGD4,MYO1B,USH2A,CDC42EP3,PARVB,MAP4,MYO3B,APC,MYO5C,SETD2,EGFR,MACF1,CTNNA3,DIAPH3,PTPN4,PHACTR1,PAK1,CTNNAL1,EPB41L3,KIF4A,TBCD,PHACTR2,CACNA1C,CACNB2,MTUS1,DCLK1,STAU2,MAPRE2,VCL,SLC8A1,FRMD3,CCSER2,MAP4K4,FMN2,HOMER2,CTNNA2,TLL7,DIP2B,TRPC5,DNM3,CALD1,SENTG2,KLHL1,RAB27B,MRTFA,COBL,MTUS2,ABLIM1,CORO2B,LIMCH1,FMN1,PAFAH1B1,TPM1,NF2,CTNNA1,PPP1R9A,MRTFB,MPRIP,ENAH,NAV3,MAGI1,ANK2,BCAS3,SYNE2,AIF1L,LDB3,DST,PTPRT,XIRP2,ABL1,PRKAA1,GAS2,TTLL5,MYO10,CLIP1,SYNE1,ACTR3C,PRKCE,PEX14,ARHGEF7,STK38L,MARK2,TMEM67,C10ORF90,TMOD2,MYLK2,ANK3,SENTG1,MYOM2,VPS41,KLHL4,HIP1,PACSIN2,PDLIM5,BRCA2,DISC1,PHACTR3,TRAK1,MYRIP,DNAL1,TUBGCP3,MDM1,MYOM1,PLS1,NIN,HAUS6,SNX6,KIF21A,KIF15,MAP2,FARP1,BBS4,MAPK8IP1,MX1,CEP44,MYO3A,PRKN,AFAP1,RACGAP1,SYBU,MYO1D,ROCK1,LYN,KIF11,DPYSL5,NEK6,SHROOM3,ARFGEF1,FLNB,IFT81,UTRN,KCNC1,HDGFL3,INO80,KIF21B,MICALL2,TLNRD1,ACTR2,CLSTN2,SKA1,LARP6,PACRG,MAP6,VASP,KIFC1,IQGAP1,LASP1,CACYBP,CENPE,ANLN,KIF6,SMTN,USH1C,MTCL1,EML1,MAST2,SHROOM2,ABI1,MYO18B,IMPACT,MYH13,ARL4C,W </p>                                                                                                                                                                                                                                                                                                                                                                                                                                                                                                                                                                                                                                                                                                                                                                                                                                                                                                                                                                                                                                                                                                                                                                                                                                             |

|            |                                                |                       |                                                                                                                                                                                                                                                                                                                                                                                                                                                                                                                                                                                                                                                                                                                                                                                                                                                                                                                                                                                                                                                                                                                                                                                                                |
|------------|------------------------------------------------|-----------------------|----------------------------------------------------------------------------------------------------------------------------------------------------------------------------------------------------------------------------------------------------------------------------------------------------------------------------------------------------------------------------------------------------------------------------------------------------------------------------------------------------------------------------------------------------------------------------------------------------------------------------------------------------------------------------------------------------------------------------------------------------------------------------------------------------------------------------------------------------------------------------------------------------------------------------------------------------------------------------------------------------------------------------------------------------------------------------------------------------------------------------------------------------------------------------------------------------------------|
|            |                                                |                       | ASF3,S100B,NCK1,TNNI1,TRPM7,KTN1,PTK2,MARK4,DIAPH1,CYFIP1,KIRREL1,SAXO1,PSTPIP2,CCDC88A,SPAG6,BICD1,FYN,MYL12B,SNTB1,RAI14,SPTB,KIF16B,TOGARAM1,MYO5B,NRAP,DLG5,EPB41L4A,ABL2,PKNOX2,FHOD3,TTL11,IPP,ANTXR1,NDRG1,MYH15,GAS2L1,RAB27A,KIF13A,FRMD5,MYO9B,CEP57L1,IRAG2,HTT,EML6,FER,SNTB2,EPS8,ROCK2,WASHC1,HOOK3,KIF7,HNRNPU,DNM1L                                                                                                                                                                                                                                                                                                                                                                                                                                                                                                                                                                                                                                                                                                                                                                                                                                                                            |
| GO:0030695 | GTPase regulator activity                      | 5.937633417364246e-11 | BCAR3,GARNL3,MYO9A,PLCB1,DLC1,ARHGAP26,RIMS1,FGD4,RIN2,ARHGAP24,DOCK10,DENND1A,RGS3,DOCK2,RABEP1,DGKI,TBC1D19,RALGPS1,RAPGEF2,ADGRB3,HERC2,RALGAPA1,RAPGEF5,TBCD,DOCK8,ARHGAP44,RANBP2,RGS20,RAP1GDS1,ARHGAP32,RGS9,RABGAP1L,ARHGEF17,TBC1D22A,CHN1,ECT2L,RASGRF2,RGL1,TIAM1,ARAP2,ARHGEF12,RIC8B,TBC1D9,RANBP3L,TBC1D5,DOCK4,RAP1A,DENND2B,RASGRF1,ASAP2,DENND4C,RGS12,EGF,TRIO,MCF2L,ARHGEF7,HERC1,KNDC1,DOCK5,PLCE1,VA1,IQSEC1,EVI5,RALGAPA2,SGSM1,TBC1D4,RIN3,ARHGAP42,GNAQ,SH3BP5,DOCK1,RAP1GAP,SRGAP2,SEC23B,PSD3,FARP1,TBC1D13,NGEF,ALS2,RACGAP1,DOCK9,VA3,ITSN2,ARHGEF28,DENND2C,ARHGAP28,ARHGAP31,EIF2B3,ARFGEF1,RALGPS2,RASGRP1,RASGEF1C,IQGAP1,NET1,SIPA1L2,MADD,AGAP9,ARFGEF3,RAPGEF4,DNMBP,CYTH4,ARHGAP12,RASGEF1B,ASAP1,CCDC88A,SH2D3C,DOCK3,TBC1D1,NRP1,BCR,ELMO1,RGS6,ARFGAP3,SRGAP3,RGPD4,KALRN,TIAM2,GAPVD1,WDR41,SLIT2,RGPD2,SIPA1L3,ARHGEF11,MYO9B,STARD13,AGAP1,RGS8,RGS7,RAB3GAP2,AKAP13,DNM1L                                                                                                                                                                                                                                                                                           |
| GO:0060589 | nucleoside - triphosphatase regulator activity | 5.937633417364246e-11 | BCAR3,GARNL3,MYO9A,PLCB1,DLC1,ARHGAP26,RIMS1,FGD4,RIN2,ARHGAP24,DOCK10,DENND1A,RGS3,DOCK2,RABEP1,DGKI,TBC1D19,RALGPS1,RAPGEF2,ADGRB3,HERC2,RALGAPA1,RAPGEF5,TBCD,DOCK8,ARHGAP44,RANBP2,RGS20,RAP1GDS1,ARHGAP32,RGS9,RABGAP1L,ARHGEF17,TBC1D22A,CHN1,ECT2L,RASGRF2,RGL1,TIAM1,ARAP2,ARHGEF12,RIC8B,TBC1D9,RANBP3L,TBC1D5,DOCK4,RAP1A,DENND2B,RASGRF1,ASAP2,DENND4C,RGS12,EGF,TRIO,MCF2L,ARHGEF7,HERC1,KNDC1,DOCK5,PLCE1,VA1,IQSEC1,EVI5,RALGAPA2,SGSM1,TBC1D4,RIN3,ARHGAP42,GNAQ,SH3BP5,DOCK1,RAP1GAP,SRGAP2,SEC23B,PSD3,FARP1,TBC1D13,NGEF,ALS2,RACGAP1,DOCK9,VA3,ITSN2,ARHGEF28,DENND2C,ARHGAP28,ARHGAP31,EIF2B3,ARFGEF1,RALGPS2,RASGRP1,RASGEF1C,IQGAP1,NET1,SIPA1L2,MADD,AGAP9,ARFGEF3,RAPGEF4,DNMBP,CYTH4,ARHGAP12,RASGEF1B,ASAP1,CCDC88A,SH2D3C,DOCK3,TBC1D1,NRP1,BCR,ELMO1,RGS6,ARFGAP3,SRGAP3,RGPD4,KALRN,TIAM2,GAPVD1,WDR41,SLIT2,RGPD2,SIPA1L3,ARHGEF11,MYO9B,STARD13,AGAP1,RGS8,RGS7,RAB3GAP2,AKAP13,DNM1L                                                                                                                                                                                                                                                                                           |
| GO:0005524 | ATP binding                                    | 6.32110237942662e-11  | MTOR,ABCA13,MYO9A,ULK2,NLK,LONP2,KSR1,NUBPL,NME7,MYO5A,GPHN,PIK3C3,NAV2,MYO1E,ALK,ERCC6L2,HLCS,MAP3K9,MYO3B,MYO5C,TNIK,NEK4,EGFR,CDK12,PRKACB,NEK7,ATP2B2,NTRK3,FLT1,GK,THRAP3,DGKI,PRKD1,PAK1,EPA7,RUNX2,CPS1,TAOK3,AGK,UBE2L3,SYN2,LRGUK,DNAH6,KIF4A,DHX32,UBE2G1,ABCB5,ADK,RPS6KA2,DCLK1,AURKA,ABCG8,MAP4K4,ABCD2,BMPR1B,PAK3,TTL7,ITPKB,UBE2E2,SYN3,PRKCZ,MSH6,ABCA5,RIPK4,MAPK1,KCNJ1,ABCD3,DNAH14,UBE2O,PI4K2B,RNGTT,CHD6,STK38,MYLK3,ACSBG1,DCAF1,TLK1,PP1P5K1,PAK5,DAPK1,NAV3,ACSM2B,STK32B,MAGI1,ALPK2,DNAH11,MELK,CLPX,SMARCA4,UBE2R2,BLK,OLA1,ATRX,NUAK1,ABL1,PRKAA1,TTL5,MAST4,DNAH5,SLFN11,ACSS3,MYO10,CAMK4,PEAK1,LATS2,ATP11C,DHX40,ABCB7,MUSK,ACTR3C,SMARCA1,ABCC12,PRKCE,WNK2,DGKB,ALPK3,ABCC9,P2RX6,TRIO,NLRP13,RPS6KA3,ATP8A2,RFC1,ATP8A1,STK38L,ABCC4,KIAA0232,FANCM,FARS2,GTTF2,MARK2,MSH2,EPA6,HIPK3,ABCA10,GRK3,AFG3L2,STK10,MYLK2,STK32A,AK8,TARS3,MTHFD1L,AQR,BLM,NRK,MAGI3,ADCY10,MYLK4,ATP9A,CDC42BPB,VRK1,BMP2K,DSTYK,PFKFB4,DNAH8,TRIT1,SMARCA2,CGAS,IDE,KIF21A,KIF15,BTAF1,PEX6,NEK10,CFTR,ATP10B,MAP4K3,MYO3A,UBE2E1,CD42BPA,MAPK10,TRPM6,PRKCH,HUNK,NLRC5,MKNK1,DMC1,MOK,MYO1D,ROCK1,LYN,KIF11,CHKA,INSR,NEK6,ABCA4,ERN2,ENPP1,ENTPD5,UCK2,CSNK2A1,PRKG1,INO80,KIF21B,ABCG1,RO |

|            |                                                   |                       |                                                                                                                                                                                                                                                                                                                                                                                                                                                                                                                                                                                                                                                                                                                                                                                                                                                                                                                                                                                                                                                                                                                                                                                                                                                                                                 |
|------------|---------------------------------------------------|-----------------------|-------------------------------------------------------------------------------------------------------------------------------------------------------------------------------------------------------------------------------------------------------------------------------------------------------------------------------------------------------------------------------------------------------------------------------------------------------------------------------------------------------------------------------------------------------------------------------------------------------------------------------------------------------------------------------------------------------------------------------------------------------------------------------------------------------------------------------------------------------------------------------------------------------------------------------------------------------------------------------------------------------------------------------------------------------------------------------------------------------------------------------------------------------------------------------------------------------------------------------------------------------------------------------------------------|
|            |                                                   |                       | R2, ACTR2, RIOK1, PRKAA2, KIFC1, MORC2, HIPK1, DGKK, FICD, CENPE, AKT3, JAK2, PRKCB, KIF6, ABCC8, RFC2, NRBP1, ATP2B1, IARS2, ASS1, ADCY9, MAST2, MAP2K6, DGKG, MYO18B, MAPK8, UBE2J2, HFM1, MYH13, ATP13A3, UBE2QL1, ACACA, MAP3K5, MAP3K4, PKN2, PASK, FGR, ATP6V1B2, TOP1, EPHA4, PPIP5K2, NTRK2, ACSM2A, TRPM7, PTK2, MARK4, DNAH10, RUNX1, HKDC1, MDN1, FYN, BUB1, NLRP14, SCN8A, ATP9B, MAPK9, ROR1, EPHB1, DDX10, ADCK1, RPS6KA5, PRKCA, NLRP4, PCCA, ABCA6, BCR, NLRP8, KIF16B, SNRK, STK36, EPHB2, CSNK1G1, DPH6, MYO5B, CDK14, MET, CAMK1G, KALRN, DHX29, DNAH3, AK3, DDX6, DNAH17, ABL2, TTLL11, CMPK1, ERBB4, PRKCQ, MYH15, AK9, CHD9, MTREX, KIF13A, DNAH9, MYO9B, ORC4, LARS2, RAD51B, CAMK1D, AK2, FER, ROCK2, NARS2, PDK1, KIF7, CLCN5, HSPA12A, STK3, PNPLA8, HNRNP1, IGF1R, PRKAG2, ATP10A                                                                                                                                                                                                                                                                                                                                                                                                                                                                                    |
| GO:0004712 | protein serine/threonine/tyrosine kinase activity | 7.104580306930085e-11 | MTOR, ULK2, NLK, KSR1, ALK, MAP3K9, MYO3B, TNIK, NEK4, EGFR, CDK12, PRKACB, NEK7, NTRK3, FLT1, PRKD1, PAK1, EPHA7, TAOK3, RPS6KA2, DCLK1, AURKA, MAP4K4, PAK3, PRKCZ, RIPK4, MAPK1, STK38, DCAF1, TLK1, PAK5, DAPK1, STK32B, ALPK2, MELK, BLK, NUAK1, ABL1, PRKAA1, MAST4, CAMK4, LATS2, MUSK, PRKCE, WNK2, ALPK3, TRIO, RPS6KA3, STK38L, MARK2, EPHA6, HIPK3, STK10, STK32A, NRK, MYLK4, CDC42BPB, VRK1, BMP2K, DSTYK, NEK10, MAP4K3, MYO3A, CDC42BPA, MAPK10, TRPM6, PRKCH, HUNK, MKNK1, MOK, ROCK1, LYN, CHKA, INSR, NEK6, ERN2, CSNK2A1, PRKG1, ROR2, RIOK1, PRKAA2, HIPK1, AKT3, JAK2, PRKCB, MAST2, MAP2K6, MAPK8, MAP3K5, MAP3K4, PKN2, PASK, FGR, EPHA4, NTRK2, TRPM7, PTK2, MARK4, FYN, BUB1, MAPK9, EPHB1, RPS6KA5, PRKCA, BCR, SNRK, STK36, EPHB2, CSNK1G1, CDK14, MET, CAMK1G, KALRN, ABL2, ERBB4, PRKCQ, CAMK1D, FER, ROCK2, STK3, IGF1R                                                                                                                                                                                                                                                                                                                                                                                                                                           |
| GO:0050839 | cell adhesion molecule binding                    | 7.598244062334822e-11 | CNTN4, PTPRD, LRRC4C, TLN2, TENM4, RDX, ERC1, EPS15L1, FBN1, CDH8, ROBO2, TENM3, DSCAM, CRKL, PTPRJ, EGFR, MACF1, CTNNA3, DIAPH3, SND1, CDH4, CAST, CNTN6, CTNNA11, SEPTIN9, ADAM10, VCL, CD2AP, CTNNA2, LARP1, CALD1, PDXDC1, ADAM22, ITGBL1, GFRA1, STK38, ITGB8, NF2, CTNNA1, CDH7, MRTFB, MPRIP, CPE, CDH11, USP8, OLA1, DST, CXADR, PTPRT, CDH18, ZC3HAV1, CDHR3, NRG1, PTPRO, STXBP6, CTNND2, PTPN2, MARK2, EPN2, ANK3, CDH20, TJP1, PACSIN2, CNTN1, PDLIM5, HMGB1, LRRFIP1, COL5A1, ITGA9, CDH23, PKP1, DOCK9, FBLN5, PTPRB, LYN, VCAM1, BZW1, TENM2, FLNB, ESYT2, SH3GLB1, CD9, UTRN, SNX9, CDH26, LAMA3, TNF, VASP, IQGAP1, LASP1, NRXN1, CADM1, ANLN, ADAMTS, ZC3H15, SERBP1, OLFM4, ITGA6, SLC14A2, UBAP2, EFHD2, STAT1, ABI1, PARK7, ITGA4, PPME1, PKN2, SDCBP, NECTIN1, NCK1, NUMB, POSTN, KTN1, PTK2, CDH5, MPP7, LAMB1, JAM2, KIRREL1, ASAP1, EDIL3, CDH9, CDH2, CNTN5, ITGA8, PRKCA, ITGA1, NRXN3, CDH12, FBLN1, CDH17, CDH13, DHX29, GAPVD1, KIRREL3, DDX6, NDRG1, NLGN1, FRMD5, NTNG1, FER, PCMT1, COL4A3                                                                                                                                                                                                                                                                     |
| GO:0032559 | adenyl ribonucleotide binding                     | 8.376655929969694e-11 | MTOR, ABCA13, MYO9A, ULK2, NLK, LONP2, KSR1, NUBPL, PDE4D, NME7, MYO5A, GPHN, PIK3C3, NAV2, MYO1E, ALK, ERCC6L2, HLCS, MAP3K9, MYO3B, MYO5C, TNIK, NEK4, EGFR, CDK12, PRKACB, NEK7, ATP2B2, NTRK3, FLT1, GK, THRAP3, DGKI, PRKD1, PAK1, EPHA7, RAPGEF2, RUNX2, CPS1, TAOK3, AGK, UBE2L3, SYN2, LRGUK, DNAH6, KIF4A, DHX32, UBE2G1, ABCB5, ADK, RPS6KA2, DCLK1, AURKA, ABCG8, MAP4K4, ABCD2, BMPR1B, PAK3, TTLL7, ITPKB, PDE10A, UBE2E2, SCP2, SYN3, PRKCZ, MSH6, ABCA5, RIPK4, MAPK1, KCNJ1, ABCD3, DNAH14, UBE2O, PI4K2B, RRGTT, CHD6, STK38, MYLK3, ACSEB1, DCAF1, TLK1, PPIP5K1, PAK5, DAPK1, NAV3, ACSM2B, STK32B, MAGI1, ALPK2, DNAH11, MELK, CLPX, SMARCA4, UBE2R2, BLK, OLA1, ATRX, NUAK1, ABL1, PRKAA1, TTLL5, MAST4, DNAH5, SLFN11, ACSS3, MYO10, CAMK4, PEAK1, LATS2, ATP11C, DHX40, ABCB7, MUSK, ACTR3C, SMARCA1, ABCC12, PRKCE, WNK2, DGKB, ALPK3, ABCC9, P2RX6, TRIO, NLRP13, RPS6KA3, ATP8A2, RFC1, ATP8A1, STK38L, ABCC4, KIAA0232, FANCM, FARS2, GTF2F2, MARK2, MSH2, MPPED2, EPHA6, HIPK3, ABCA10, GRK3, AFG3L2, STK10, MYLK2, STK32A, AK8, TARS3, MTHFD1L, AQR, BLM, NRK, MAGI3, ADCY10, MYLK4, ATP9A, CDC42BPB, VRK1, BMP2K, DSTYK, PFKFB4, DNAH8, TRIT1, SMARCA2, CGAS, IDE, KIF21A, KIF15, BTAF1, PEX6, NEK10, CFTR, ATP10B, MAP4K3, MYO3A, UBE2E1, CDC42BPA, MAPK10, TRPM |

|            |                                         |                       |                                                                                                                                                                                                                                                                                                                                                                                                                                                                                                                                                                                                                                                                                                                                                                                                                                                                                                                                                                                                                                                                                                                                                                                                                                                                                                                                                                                                                                                                                                                                                                                                                                                                                                                                                                                                                                                                                                                                                                                                                                                                                                                                                                                                                                                                                                                                                                                                                                                                                                                                                                                                                                                                                                                                                                                                                                                                                                                                                                                                                       |
|------------|-----------------------------------------|-----------------------|-----------------------------------------------------------------------------------------------------------------------------------------------------------------------------------------------------------------------------------------------------------------------------------------------------------------------------------------------------------------------------------------------------------------------------------------------------------------------------------------------------------------------------------------------------------------------------------------------------------------------------------------------------------------------------------------------------------------------------------------------------------------------------------------------------------------------------------------------------------------------------------------------------------------------------------------------------------------------------------------------------------------------------------------------------------------------------------------------------------------------------------------------------------------------------------------------------------------------------------------------------------------------------------------------------------------------------------------------------------------------------------------------------------------------------------------------------------------------------------------------------------------------------------------------------------------------------------------------------------------------------------------------------------------------------------------------------------------------------------------------------------------------------------------------------------------------------------------------------------------------------------------------------------------------------------------------------------------------------------------------------------------------------------------------------------------------------------------------------------------------------------------------------------------------------------------------------------------------------------------------------------------------------------------------------------------------------------------------------------------------------------------------------------------------------------------------------------------------------------------------------------------------------------------------------------------------------------------------------------------------------------------------------------------------------------------------------------------------------------------------------------------------------------------------------------------------------------------------------------------------------------------------------------------------------------------------------------------------------------------------------------------------|
|            |                                         |                       | 6, PRKCH, HUNK, NLRC5, MKNK1, DMC1, MOK, MYO1D, ROCK1, LYN, KIF11, CHKA, INSR, NEK6, ABCA4, ERN2, ENPP1, ENTPD5, UCK2, CSNK2A1, HCN1, PRKG1, INO80, KIF21B, ABCG1, HADHA, ROR2, ACTR2, RIOK1, PRKAA2, KIFC1, MORC2, HIPK1, DGKK, FICD, CENPE, AKT3, JAK2, PRKCB, KIF6, ABCC8, RFC2, NRBP1, ATP2B1, IARS2, ASS1, ADCY9, MAST2, MAP2K6, DGKG, MYO18B, MAPK8, UBE2J2, RAPGEF4, HFM1, MYH13, ATP13A3, UBE2QL1, ACACA, MAP3K5, MAP3K4, PKN2, PDE2A, PASK, FGR, ATP6V1B2, TOP1, EPHA4, PPIP5K2, NTRK2, ACSM2A, TRPM7, PTK2, MARK4, DNAH10, RUNX1, HKDC1, MDN1, FYN, BUB1, NLRP14, SCN8A, ATP9B, MAPK9, ROR1, EPHB1, DDX10, ADCK1, RPS6KA5, PRKCA, NLRP4, PCCA, ABCA6, BCR, NLRP8, KIF16B, SNRK, STK36, EPHB2, CSNK1G1, DPH6, MYO5B, CDK14, MET, CAMK1G, KALRN, DHX29, DNAH3, AK3, DDX6, DNAH17, ABL2, TTLL11, CMPK1, ERBB4, PRKCQ, MYH15, AK9, CHD9, MTREX, KIF13A, DNAH9, MYO9B, ORC4, LARS2, RAD51B, CAMK1D, AK2, FER, ROCK2, NARS2, PDK1, KIF7, CLCN5, PNPLA3, HSPA12A, STK3, PNPLA8, HNRNPU, IGF1R, PRKAG2, ATP10A                                                                                                                                                                                                                                                                                                                                                                                                                                                                                                                                                                                                                                                                                                                                                                                                                                                                                                                                                                                                                                                                                                                                                                                                                                                                                                                                                                                                                                                                                                                                                                                                                                                                                                                                                                                                                                                                                                                                                                                                      |
| GO:0140096 | catalytic activity, acting on a protein | 9.011985489618256e-11 | MTOR, IMMP2L, PTPRD, TMTC1, ULK2, NLK, LONP2, KSR1, AGBL1, TTC3, TMPPRS2, DPP10, ZDHHC21, PTPRA, PRDM16, F13A1, PIK3C3, GALNT1, ENPEP, PCMTD1, ALK, PJA2, PAPPA2, HLCS, EGLN3, MAP3K9, MYO3B, CPA6, SETD2, TNIK, PTPRJ, KDM4C, NEK4, EGFR, USP14, CDK12, PRKACB, NEK7, RNF220, NEDD4, NSMCE2, PSMB2, PTPN4, NTRK3, FLT1, ADAMTS6, TASP1, PRKD1, TPTE2, PAK1, EPHA7, PELI2, CPS1, TAOK3, ADAMTSL1, UBE2L3, PTPRN2, SMYD3, HERC2, WDSUB1, NEDD4L, ADAM32, ADAM10, HDAC9, UBE2G1, RPS6KA2, KDM1B, KLHL13, DCLK1, USP18, PARP15, AURKA, PTPRR, FIG4, MARCFH1, MAP4K4, BMPR1B, PCSK6, PAK3, TTLL7, RANBP2, UBE2E2, PRKCZ, HECW1, ADAMTS17, SENP6, DUSP22, GALNT14, PPM1L, RIPK4, MAPK1, MGAT5, ADAM22, USP25, PLG, PAPPA, ZNRF3, UBE2O, GALNT16, RRGTT, STK38, PTPN13, MYLK3, EFEMP1, TLL1, DCAF1, TLK1, ZDHHC14, CORIN, BIRC6, ERMP1, ADAMTS3, UBE3D, PTPRK, PAK5, PDZRN3, DAPK1, STK32B, ALPK2, JARID2, CPE, MELK, HECTD4, CLPX, DUSP16, USP8, PIAS1, UBE2R2, BLK, NUA1, PTPRT, ABL1, PTPN12, HDAC4, PRKAA1, TTLL5, ADAMTS14, MAST4, ATE1, HECTD2, CAMK4, TGM1, PEAK1, LATS2, MUSK, GALNTL6, SETDB2, PRKCE, METAP1D, NXN, WNK2, B4GALNT3, USP33, PTPRO, ALPK3, TRIO, LNPEP, ADAMTS2, RPS6KA3, MARCHF8, MTMR3, PTPN2, TRIM5, ATXN3, LTBP1, STK38L, GALNT10, KDM7A, PRMT8, MARK2, C10ORF90, ABHD17C, HERC1, EPHA6, HIPK3, GRK3, CPXM2, AFG3L2, STK10, TMTCC2, ADAM12, MYLK2, XYLT1, CCND3, FOLH1, ECE1, STK32A, LYPLA1, CWC27, CRIM1, XPNPEP1, GSR, CAPN5, FKBP5, BRCA2, GALNT13, NRK, RC3H2, MYLK4, CDC42BPB, VRK1, BMP2K, RNF38, PGPEP1, RELN, TRAF3, DSTYK, ENOX1, CASP5, IDE, NEK10, ATF2, CYLD, ZZE1, UBR1, MAP4K3, MED27, MYO3A, UBE2E1, PTPRE, PRKN, MTMR2, CDC42BPA, MAPK10, FBXO3, TXNRD2, WSB1, USP43, TRPM6, PRKCH, HUNK, PEPD, CPVL, MKNK1, PTPRB, AOPEP, USP7, MOK, ADGRG6, PPA2, ROCK1, LYN, CTSB, DTX1, CHKA, MMP16, FANCL, RNF152, OTUD7A, INSR, CUL5, NEK6, HECTD1, HDAC11, LYPLAL1, ADAMTS19, ASH1L, SIAH2, PIGK, TRABD2B, UFD1, ERN2, MBTPS2, TRIM58, ZDHHC17, NSD2, PTAR1, LTN1, PAMR1, CSNK2A1, PPIL6, EOGT, CTDP1, PRKG1, ASB4, MARCHF11, ATG4B, CDC14B, KDM6A, ROR2, RIOK1, SOSTDC1, PRKAA2, QSOX2, RNF182, ERO1B, HIPK1, FICD, AKT3, JAK2, ADAM28, PRSS2, CREBBP, TNKS, SIAH3, UFL1, ADAMTS5, PRKCB, FBXW2, MIPEP, OVCH1, BRD4, NRBP1, CLCA4, CNDP2, MAST2, PCMTD2, PDP2, GRXCR1, MAP2K6, MARCHF6, PARK7, ADAMTS18, MAPK8, EIF3F, PPME1, UBE2J2, ASB2, UBE2QL1, MAP3K5, MAP3K4, TRIM43B, PRDM13, TRIM43, MAGEL2, PKN2, LRRC2, FBXW8, SPPL2B, NSMCE1, PASK, FGR, TRIM23, TOP1, TINAG, C2, RNF8, EPHA4, MECOM, NTRK2, ADAMTS9, TRPM7, PRKAB1, PTK2, MARK4, CD5L, UBE3A, AMFR, CTSE, POMT2, TPTE, GALNT18, ADAMTS16, FYN, BUB1, KDM5A, PPM1F, UHRF2, HDAC2, GALNT17, MTMR7, MAPK9, ROR1, GALNT2, FUT8, HECW2, OVCH2, PHLPP1, EPHB1, ZDHHC18, ADCK1, RPS6KA5, PTPRG, NRP1, PRKCA, ATPSCKMT, RNF215, USP24, RNF138, RC3H1, ZNF738, BCR, SNRK, SENP8, USP49, STK36, RAG1, DNPEP, DP6, EPHB2, CSNK1G1, RNF11, EYA4, PPIL2, PRSS51, CDK14, MET, SPPL3, CAMK1G, USP32, ADAM29, KALRN, CPQ, TRIM9, TMPPRS15, |

|                |                                 |                               |                                                                                                                                                                                                                                                                                                                                                                                                                                                                                                                                                                                                                                                                                                                                                                                                                                                                                                                                                                                                                                                                                                                                                                                                                                                                                                                                                                                                                                                                                                                                                                                                                                                                                                                                                                                                                                                                                                                                                                                                                                                                                                                                                                                                                                                                                                                                                                                                                                                            |
|----------------|---------------------------------|-------------------------------|------------------------------------------------------------------------------------------------------------------------------------------------------------------------------------------------------------------------------------------------------------------------------------------------------------------------------------------------------------------------------------------------------------------------------------------------------------------------------------------------------------------------------------------------------------------------------------------------------------------------------------------------------------------------------------------------------------------------------------------------------------------------------------------------------------------------------------------------------------------------------------------------------------------------------------------------------------------------------------------------------------------------------------------------------------------------------------------------------------------------------------------------------------------------------------------------------------------------------------------------------------------------------------------------------------------------------------------------------------------------------------------------------------------------------------------------------------------------------------------------------------------------------------------------------------------------------------------------------------------------------------------------------------------------------------------------------------------------------------------------------------------------------------------------------------------------------------------------------------------------------------------------------------------------------------------------------------------------------------------------------------------------------------------------------------------------------------------------------------------------------------------------------------------------------------------------------------------------------------------------------------------------------------------------------------------------------------------------------------------------------------------------------------------------------------------------------------|
|                |                                 |                               | RNF217, PRSS23, KMT2C, ABL2, MMP26, BACE2, EYA1, TTL11, PA<br>RP8, TMRSS3, ESCO1, ERBB4, TRHDE, PRKCQ, NSD1, EHMT1, USP3<br>1, KDM4B, LOXL2, ZDHHC11B, CAMK1D, CFAP44, FER, EYA2, CHFR,<br>PCMT1, ROCK2, ATAT1, PPP1CB, PDK1, PTPRQ, TRIM2, PCSK2, BAR<br>D1, PALD1, STK3, IGF1R, PRKAG2, AKAP13                                                                                                                                                                                                                                                                                                                                                                                                                                                                                                                                                                                                                                                                                                                                                                                                                                                                                                                                                                                                                                                                                                                                                                                                                                                                                                                                                                                                                                                                                                                                                                                                                                                                                                                                                                                                                                                                                                                                                                                                                                                                                                                                                           |
| GO:00<br>30554 | adenyl<br>nucleotide<br>binding | 2.31766<br>3553598<br>74e-10  | MTOR, ABCA13, MYO9A, ULK2, NLK, LONP2, KSR1, NUBPL, PDE4D, N<br>ME7, MYO5A, GPHN, PIK3C3, NAV2, MYO1E, ALK, ERCC6L2, HLCS, M<br>AP3K9, MYO3B, MYO5C, TNIK, NEK4, EGFR, CDK12, PRKACB, NEK7,<br>ATP2B2, NTRK3, FLT1, GK, THRAP3, DGKI, PRKD1, PAK1, EPHA7, R<br>APGEF2, RUNX2, CPS1, TAOK3, AGK, UBE2L3, SYN2, LRGUK, DNAH6<br>, KIF4A, DHX32, UBE2G1, ABCB5, ADK, RPS6KA2, DCLK1, AURKA, A<br>BCG8, MAP4K4, ABCD2, BMPR1B, PAK3, TTL7, ITPKB, PDE10A, UB<br>E2E2, SCP2, SYN3, PRKCZ, MSH6, ABCA5, RIPK4, MAPK1, KCNJ1, A<br>BCD3, DNAH14, UBE2O, PI4K2B, RRGTT, CHD6, STK38, MYLK3, ACS<br>BG1, DCAF1, TLK1, PPIP5K1, PAK5, DAPK1, NAV3, ACSM2B, STK32<br>B, MAGI1, ALPK2, DNAH11, MELK, CLPX, SMARCA4, UBE2R2, BLK, O<br>LA1, ATRX, NUA1, ABL1, PRKAA1, TTL5, MAST4, DNAH5, SLFN11<br>, ACSS3, MYO10, CAMK4, PEAK1, LATS2, ATP11C, DHX40, ABCB7, M<br>USK, ACTR3C, SMARCA4, ABCC12, PRKCE, WNK2, DGKB, ALPK3, AB<br>CC9, P2RX6, TRIO, NLRP13, RPS6KA3, ATP8A2, RFC1, ATP8A1, ST<br>K38L, ABCC4, KIAA0232, FANCM, FARS2, GTF2F2, MARK2, MSH2, M<br>PPED2, EPHA6, HIPK3, ABCA10, GRK3, AFG3L2, STK10, MYLK2, ST<br>K32A, AK8, TARS3, MTHFD1L, AQR, BLM, NRK, MAGI3, ADCY10, MYL<br>K4, ATP9A, CDC42BPB, VRK1, BMP2K, DSTYK, PFKFB4, DNAH8, TRI<br>T1, SMARCA2, CGAS, IDE, KIF21A, KIF15, BTAF1, PEX6, NEK10, C<br>FTR, ATP10B, MAP4K3, MYO3A, UBE2E1, CDC42BPA, MAPK10, TRPM<br>6, PRKCH, HUNK, NLRC5, MKNK1, DMC1, MOK, MYO1D, ROCK1, LYN, K<br>IF11, CHKA, INSR, NEK6, ABCA4, ERN2, ENPP1, ENTPD5, UCK2, CS<br>NK2A1, HCN1, PRKG1, INO80, KIF21B, ABCG1, HADHA, ROR2, ACTR<br>2, RIOK1, PRKAA2, KIFC1, MORC2, HIPK1, DGKK, FICD, CENPE, AK<br>T3, JAK2, PRKCB, KIF6, ABCC8, RFC2, NRBP1, ATP2B1, IARS2, AS<br>S1, ADCY9, MAST2, MAP2K6, DGKG, MYO18B, MAPK8, UBE2J2, RAPG<br>EF4, HFM1, MYH13, ATP13A3, UBE2QL1, ACACA, MAP3K5, MAP3K4,<br>PKN2, PDE2A, PASK, FGR, ATP6V1B2, TOP1, EPHA4, PPIP5K2, NTR<br>K2, ACSM2A, TRPM7, PTK2, MARK4, DNAH10, RUNX1, HKDC1, MDN1,<br>FYN, BUB1, NLRP14, SCN8A, ATP9B, MAPK9, ROR1, EPHB1, DDX10,<br>ADCK1, RPS6KA5, PRKCA, NLRP4, PCCA, ABCA6, BCR, NLRP8, KIF1<br>6B, SNRK, STK36, EPHB2, CSNK1G1, DPH6, MYO5B, CDK14, MET, CA<br>MK1G, KALRN, DHX29, DNAH3, AK3, DDX6, DNAH17, ABL2, TTL11,<br>CMPK1, ERBB4, PRKCQ, MYH15, AK9, CHD9, MTREX, KIF13A, DNAH9<br>, MYO9B, ORC4, LARS2, RAD51B, CAMK1D, AK2, FER, ROCK2, NARS2<br>, PDK1, KIF7, CLCN5, PNPLA3, HSPA12A, STK3, PNPLA8, HNRNP<br>U, IGF1R, PRKAG2, ATP10A |
| GO:00<br>32553 | ribonucleo<br>tide<br>binding   | 8.58460<br>7347321<br>197e-10 | MTOR, ABCA13, MYO9A, ULK2, NLK, LONP2, KSR1, MX2, ARL15, NUB<br>PL, PDE4D, RALA, NME7, MYO5A, GPHN, PIK3C3, NAV2, MYO1E, ALK<br>, ERCC6L2, HLCS, MAP3K9, MYO3B, MYO5C, TNIK, NEK4, EGFR, CDK<br>12, PRKACB, NEK7, ATP2B2, NTRK3, FLT1, GK, THRAP3, DGKI, PRK<br>D1, PAK1, EPHA7, ADSS2, RAPGEF2, RUNX2, CPS1, TAOK3, AGK, RA<br>NBP17, UBE2L3, SYN2, TYW1, LRGUK, SEPTIN9, DNAH6, KIF4A, DH<br>X32, UBE2G1, ABCB5, ADK, RPS6KA2, DCLK1, AURKA, ABCG8, MAP4<br>K4, ABCD2, BMPR1B, RAB8B, PAK3, TTL7, ITPKB, PDE10A, UBE2E<br>2, HHAT, DNM3, SCP2, SYN3, PRKCZ, MSH6, RAB27B, ABCA5, RIPK4<br>, MAPK1, KCNJ1, ABCD3, DNAH14, UBE2O, PI4K2B, RRGTT, CHD6, S<br>TK38, MYLK3, ACSBG1, DCAF1, TLK1, PPIP5K1, PAK5, DAPK1, NAV<br>3, ACSM2B, STK32B, MAGI1, ALPK2, DNAH11, RAB22A, MELK, CLPX<br>, SMARCA4, EFTUD2, UBE2R2, BLK, OLA1, ATRX, NUA1, ABL1, PRK<br>AA1, TTL5, MAST4, DNAH5, GUCY1A2, SLFN11, RAP1A, ACSS3, MY<br>O10, CAMK4, PEAK1, LATS2, ATP11C, DHX40, ABCB7, MUSK, ACTR3<br>C, SMARCA4, ABCC12, PRKCE, WNK2, DGKB, ALPK3, ABCC9, P2RX6<br>, TRIO, NLRP13, RPS6KA3, ATP8A2, SCG5, RFC1, ATP8A1, STK38L<br>, ABCC4, KIAA0232, FANCM, FARS2, GTF2F2, MARK2, MSH2, MPPED<br>2, GNAL, EPHA6, ATL1, HIPK3, ABCA10, GRK3, NOS2, AFG3L2, STK<br>10, MYLK2, GBP6, STK32A, AK8, TARS3, MTHFD1L, AQR, BLM, NRK,<br>MAGI3, ADCY10, MYLK4, ATP9A, CDC42BPB, VRK1, GNAI1, BMP2K,<br>PDE6C, GNAQ, DSTYK, PFKFB4, NIN, DNAH8, TRIT1, SMARCA2, CGA<br>S, IDE, KIF21A, KIF15, RERGL, BTAF1, PEX6, NEK10, MX1, CFTR,                                                                                                                                                                                                                                                                                                                                                                                                                                                                                                                                                                                                                                                                                                                                                                                                                                                                                                                                                |

|            |                                            |                       |                                                                                                                                                                                                                                                                                                                                                                                                                                                                                                                                                                                                                                                                                                                                                                                                                                                                                                                                                                                                                                                                                                                                                                                                                                                                                                                                                                                                                                                                                                                                                                                                                                                                                                                                                                                                                                                                                                                                                                                                                                                                                                                                                                                                                                     |
|------------|--------------------------------------------|-----------------------|-------------------------------------------------------------------------------------------------------------------------------------------------------------------------------------------------------------------------------------------------------------------------------------------------------------------------------------------------------------------------------------------------------------------------------------------------------------------------------------------------------------------------------------------------------------------------------------------------------------------------------------------------------------------------------------------------------------------------------------------------------------------------------------------------------------------------------------------------------------------------------------------------------------------------------------------------------------------------------------------------------------------------------------------------------------------------------------------------------------------------------------------------------------------------------------------------------------------------------------------------------------------------------------------------------------------------------------------------------------------------------------------------------------------------------------------------------------------------------------------------------------------------------------------------------------------------------------------------------------------------------------------------------------------------------------------------------------------------------------------------------------------------------------------------------------------------------------------------------------------------------------------------------------------------------------------------------------------------------------------------------------------------------------------------------------------------------------------------------------------------------------------------------------------------------------------------------------------------------------|
|            |                                            |                       | <p>ATP10B,MAP4K3,MYO3A,UBE2E1,CDC42BPA,MAPK10,TRPM6,PRKCH,HUNK,NLRC5,MKNK1,DMC1,MOK,RALB,MYO1D,ROCK1,LYN,KIF11,CHKA,RRAGD,CRACR2A,INSR,NEK6,ABCA4,ERN2,SAMHD1,ENPP1,ENTPD5,UCK2,CSNK2A1,HCN1,PRKG1,INO80,KIF21B,ABCG1,HADHA,ROR2,ACTR2,RIOK1,PRKAA2,DIRAS2,RAB12,KIFC1,MORC2,HIPK1,DGKK,FICD,CENPE,TUBB6,AKT3,JAK2,ARL11,PRKCB,KIF6,ABCC8,RFC2,NRBP1,ATP2B1,IARS2,ASS1,SAR1A,ADCY9,MAST2,MAP2K6,DGKG,MYO18B,MAPK8,UBE2J2,RA PGEF4,HFM1,MYH13,ATP13A3,UBE2QL1,ACACA,ARL4C,MAP3K5,MAP3K4,PKN2,PDE2A,RAB38,PASK,FGR,TRIM23,ATP6V1B2,TO P1,EPHA4,PIIP5K2,NTRK2,ACSM2A,TRPM7,PTK2,MARK4,DNAH10,RUNX1,HKDC1,MDN1,FYN,BUB1,NLRP14,ARL13B,SCN8A,ATP9B,UGP2,MAPK9,ROR1,EPHB1,DDX10,ADCK1,RPS6KA5,PRKCA,GBP4,NLRP4,PCCA,POR,ABCA6,EFL1,BCR,RERG,NLRP8,KIF16B,SNRK,STK36,RRAS2,GNA14,RABL2A,EPHB2,CSNK1G1,DPH6,MYO5B,CDK14,MET,CAMK1G,KALRN,GNAS,MFHAS1,DHX29,DNAH3,AK3,DDX6,UPRT,DNAH17,ABL2,TTL11,CMPK1,ERBB4,PRKCQ,MYH15,AK9,NOS1,CHD9,MTREX,RAB27A,KIF13A,DNAH9,MYO9B,ORC4,LARS2,RAD51B,CAMK1D,AK2,FER,AGAP1,ROCK2,NARS2,RAB31,PK1,KIF7,CLCN5,PNPLA3,HSPA12A,STK3,PNPLA8,HNRNP1,IGF1R,PRKAG2,ATP10A,SEPTIN6,DNM1L</p>                                                                                                                                                                                                                                                                                                                                                                                                                                                                                                                                                                                                                                                                                                                                                                                                                                                                                                                                                                                                                                                                                                                      |
| GO:0035639 | purine ribonucleoside triphosphate binding | 2.1719537909004807e-9 | <p>MTOR,ABCA13,MYO9A,ULK2,NLK,LONP2,KSR1,MX2,ARL15,NUBPL,RALA,NME7,MYO5A,GPHN,PIK3C3,NAV2,MYO1E,ALK,ERCC6L2,HLCS,MAP3K9,MYO3B,MYO5C,TN1K,NEK4,EGFR,CDK12,PRKACB,NEK7,ATP2B2,NTRK3,FLT1,GK,THRAP3,DGKI,PRKD1,PAK1,EPHA7,ADSS2,RUNX2,CPS1,TAOK3,AGK,RANBP17,UBE2L3,SYN2,LRGUK,SEPTIN9,DNAH6,KIF4A,DHX32,UBE2G1,ABCB5,ADK,RPS6KA2,DCLK1,AURKA,ABCG8,MAP4K4,ABCD2,BMPR1B,RAB8B,PAK3,TTL7,ITPKB,UBE2E2,HHAT,DNM3,SYN3,PRKCZ,MSH6,RAB27B,ABCA5,RIPK4,MAPK1,KCNJ1,ABCD3,DNAH14,UBE20,PI4K2B,RNGTT,CHD6,STK38,MYLK3,ACSBG1,DCAF1,TLK1,PIIP5K1,PAK5,DAPK1,NAV3,ACSM2B,STK32B,MAGI1,ALPK2,DNAH11,RAB22A,MELK,CLPX,SMARCA4,EFTUD2,UBE2R2,BLK,OLA1,ATRX,NUAK1,ABL1,PRKAA1,TTL5,MAST4,DNAH5,GUCY1A2,S LFN11,RAP1A,ACSS3,MYO10,CAMK4,PEAK1,LATS2,ATP11C,DH X40,ABCB7,MUSK,ACTR3C,SMARCA1,ABCC12,PRKCE,WNK2,DGKB,ALPK3,ABCC9,P2RX6,TRIO,NLRP13,RPS6KA3,ATP8A2,SCG5,RFC1,ATP8A1,STK38L,ABCC4,KIAA0232,FANCM,FARS2,GT2F2,MARK2,MSH2,GNAL,EPHA6,ATL1,HIPK3,ABCA10,GRK3,AFG3L2,STK10,MYLK2,GBP6,STK32A,AK8,TARS3,MTHFD1L,AQR,BLM,NRK,MAGI3,ADCY10,MYLK4,ATP9A,CDC42BPB,VRK1,GNAI1,BMP2K,GNAG,DSTYK,PFKFB4,NIN,DNAH8,TRIT1,SMARCA2,C GAS,IDE,KIF21A,KIF15,RERGL,BTAF1,PEX6,NEK10,MX1,CFT R,ATP10B,MAP4K3,MYO3A,UBE2E1,CDC42BPA,MAPK10,TRPM6,PRKCH,HUNK,NLRC5,MKNK1,DMC1,MOK,RALB,MYO1D,ROCK1,LYN,KIF11,CHKA,RRAGD,CRACR2A,INSR,NEK6,ABCA4,ERN2,SAMHD1,ENPP1,ENTPD5,UCK2,CSNK2A1,PRKG1,INO80,KIF21B,ABCG1,ROR2,ACTR2,RIOK1,PRKAA2,DIRAS2,RAB12,KIFC1,MORC2,HIPK1,DGKK,FICD,CENPE,TUBB6,AKT3,JAK2,ARL11,PRKCB,KIF6,ABCC8,RFC2,NRBP1,ATP2B1,IARS2,ASS1,SAR1A,ADCY9,MAST2,MAP2K6,DGKG,MYO18B,MAPK8,UBE2J2,HFM1,MYH13,ATP13A3,UBE2QL1,ACACA,ARL4C,MAP3K5,MAP3K4,PKN2,RAB38,PASK,FGR,TRIM23,ATP6V1B2,TO P1,EPHA4,PIIP5K2,NTRK2,ACSM2A,TRPM7,PTK2,MARK4,DNAH10,RUNX1,HKDC1,MDN1,FYN,BUB1,NLRP14,ARL13B,SCN8A,ATP9B,MAPK9,ROR1,EPHB1,DDX10,ADCK1,RPS6KA5,PRKCA,GBP4,NLRP4,PCCA,ABCA6,EFL1,BCR,RERG,NLRP8,KIF16B,SNRK,STK36,RRAS2,GNA14,RABL2A,EPHB2,CSNK1G1,DPH6,MYO5B,CDK14,MET,CAMK1G,KALRN,GNAS,MFHAS1,DHX29,DNAH3,AK3,DDX6,UPRT,DNAH17,ABL2,TTL11,CMPK1,ERBB4,PRKCQ,MYH15,AK9,CHD9,MTREX,RAB27A,KIF13A,DNAH9,MYO9B,ORC4,LARS2,RAD51B,CAMK1D,AK2,FER,AGAP1,ROCK2,NARS2,RAB31,PK1,KIF7,CLCN5,HSPA12A,STK3,PNPLA8,HNRNP1,IGF1R,PRKAG2,ATP10A,SEPTIN6,DNM1L</p> |
| GO:0032555 | purine ribonucleo                          | 2.361950701799        | <p>MTOR,ABCA13,MYO9A,ULK2,NLK,LONP2,KSR1,MX2,ARL15,NUBPL,PDE4D,RALA,NME7,MYO5A,GPHN,PIK3C3,NAV2,MYO1E,ALK,ERCC6L2,HLCS,MAP3K9,MYO3B,MYO5C,TN1K,NEK4,EGFR,CDK</p>                                                                                                                                                                                                                                                                                                                                                                                                                                                                                                                                                                                                                                                                                                                                                                                                                                                                                                                                                                                                                                                                                                                                                                                                                                                                                                                                                                                                                                                                                                                                                                                                                                                                                                                                                                                                                                                                                                                                                                                                                                                                    |



|            |               |                       |                                                                                                                                                                                                                                                                                                                                                                                                                                                                                                                                                                                                                                                                                                                                                                                                                                                                                                                                                                                                                                                                                                                                                                                                                                                                                                                                                                                                                                                                                                                                                                                                                                                                                                                                                                                                                                                                                                                                                                                                                                                                                                                                                                                                                                                                                                                                                                                                                                                                                                                                   |
|------------|---------------|-----------------------|-----------------------------------------------------------------------------------------------------------------------------------------------------------------------------------------------------------------------------------------------------------------------------------------------------------------------------------------------------------------------------------------------------------------------------------------------------------------------------------------------------------------------------------------------------------------------------------------------------------------------------------------------------------------------------------------------------------------------------------------------------------------------------------------------------------------------------------------------------------------------------------------------------------------------------------------------------------------------------------------------------------------------------------------------------------------------------------------------------------------------------------------------------------------------------------------------------------------------------------------------------------------------------------------------------------------------------------------------------------------------------------------------------------------------------------------------------------------------------------------------------------------------------------------------------------------------------------------------------------------------------------------------------------------------------------------------------------------------------------------------------------------------------------------------------------------------------------------------------------------------------------------------------------------------------------------------------------------------------------------------------------------------------------------------------------------------------------------------------------------------------------------------------------------------------------------------------------------------------------------------------------------------------------------------------------------------------------------------------------------------------------------------------------------------------------------------------------------------------------------------------------------------------------|
|            | tide binding  | 8428e-9               | <p>12, PRKACB, NEK7, ATP2B2, NTRK3, FLT1, GK, THRAP3, DGKI, PRK D1, PAK1, EPHA7, ADSS2, RAPGEF2, RUNX2, CPS1, TAOK3, AGK, RANBP17, UBE2L3, SYN2, LRGUK, SEPTIN9, DNAH6, KIF4A, DHX32, UBE2G1, ABCB5, ADK, RPS6KA2, DCLK1, AURKA, ABCG8, MAP4K4, ABCD2, BMPR1B, RAB8B, PAK3, TTLL7, ITPKB, PDE10A, UBE2E2, HHA T, DNM3, SCP2, SYN3, PRKCZ, MSH6, RAB27B, ABCA5, RIPK4, MAPK 1, KCNJ1, ABCD3, DNAH14, UBE20, PI4K2B, RRGTT, CHD6, STK38, MYLK3, ACSBG1, DCAF1, TLK1, PPIP5K1, PAK5, DAPK1, NAV3, ACS M2B, STK32B, MAGI1, ALPK2, DNAH11, RAB22A, MELK, CLPX, SMAR CA4, EFTUD2, UBE2R2, BLK, OLA1, ATRX, NUA1, ABL1, PRKAA1, T TLL5, MAST4, DNAH5, GUCY1A2, SLFN11, RAP1A, ACSS3, MYO10, C AMK4, PEAK1, LATS2, ATP11C, DHX40, ABCB7, MUSK, ACTR3C, SMA RCAD1, ABCC12, PRKCE, WNK2, DGKB, ALPK3, ABCC9, P2RX6, TRIO, NLRP13, RPS6KA3, ATP8A2, SCG5, RFC1, ATP8A1, STK38L, ABCC 4, KIAA0232, FANCM, FARS2, GTF2F2, MARK2, MSH2, MPPED2, GNA L, EPHA6, ATL1, HIPK3, ABCA10, GRK3, AFG3L2, STK10, MYLK2, G BP6, STK32A, AK8, TARS3, MTHFD1L, AQR, BLM, NRK, MAGI3, ADCY 10, MYLK4, ATP9A, CDC42BPB, VRK1, GNAI1, BMP2K, PDE6C, GNAQ, DSTYK, PFKFB4, NIN, DNAH8, TRIT1, SMARCA2, CGAS, IDE, KIF2 1A, KIF15, RERGL, BTAF1, PEX6, NEK10, MX1, CFTR, ATP10B, MAP 4K3, MYO3A, UBE2E1, CDC42BPA, MAPK10, TREM6, PRKCH, HUNK, N LRC5, MKNK1, DMC1, MOK, RALB, MYO1D, ROCK1, LYN, KIF11, CHKA, RRAGD, CRACR2A, INSR, NEK6, ABCA4, ERN2, SAMHD1, ENPP1, EN TPD5, UCK2, CSNK2A1, HCN1, PRKG1, INO80, KIF21B, ABCG1, HAD HA, ROR2, ACTR2, RIOK1, PRKAA2, DIRAS2, RAB12, KIFC1, MORC2, HIPK1, DGKK, FICD, CENPE, TUBB6, AKT3, JAK2, ARL11, PRKCB, KIF6, ABCC8, RFC2, NRBP1, ATP2B1, IARS2, ASS1, SAR1A, ADCY9, MAST2, MAP2K6, DGKG, MYO18B, MAPK8, UBE2J2, RAPGEF4, HFM1, MYH13, ATP13A3, UBE2QL1, ACACA, ARL4C, MAP3K5, MAP3K4, PK N2, PDE2A, RAB38, PASK, FGR, TRIM23, ATP6V1B2, TOP1, EPHA4, PPIP5K2, NTRK2, ACSM2A, TRPM7, PTK2, MARK4, DNAH10, RUNX1, HKDC1, MDN1, FYN, BUB1, NLRP14, ARL13B, SCN8A, ATP9B, MAPK9, ROR1, EPHB1, DDX10, ADCK1, RPS6KA5, PRKCA, GBP4, NLRP4, PC CA, ABCA6, EFL1, BCR, RERG, NLRP8, KIF16B, SNRK, STK36, RRAS 2, GNA14, RABL2A, EPHB2, CSNK1G1, DPH6, MYO5B, CDK14, MET, C AMK1G, KALRN, GNAS, MFHAS1, DHX29, DNAH3, AK3, DDX6, UPRT, D NAH17, ABL2, TTLL11, CMPK1, ERBB4, PRKCQ, MYH15, AK9, CHD9, MTREX, RAB27A, KIF13A, DNAH9, MYO9B, ORC4, LARS2, RAD51B, C AMK1D, AK2, FER, AGAP1, ROCK2, NARS2, RAB31, PDK1, KIF7, CLC N5, PNPLA3, HSPA12A, STK3, PNPLA8, HNRNPU, IGF1R, PRKAG2, A TP10A, SEPTIN6, DNMI1L</p> |
| GO:0043168 | anion binding | 3.4403121122546087e-9 | <p>MTOR, EXOC1L, ABCA13, MYO9A, ULK2, NLK, LONP2, KSRI, PLCB1, MX2, SVIL, ARL15, MICAL3, NUBPL, ITPR2, PDE4D, RALA, NME7, M YO5A, GPHN, PIK3C3, AKR1C3, NAV2, MYO1E, ALK, ERCC6L2, HLCS, FCHO2, EGLN3, MAP3K9, MYO3B, MOCOS, MYO5C, TNIK, NEK4, EGF R, CDK12, PRKACB, NEK7, ATP2B2, NTRK3, FLT1, GK, THRAP3, DGK I, PRKD1, PAK1, GMDS, EPHA7, ADSS2, GRAMD1B, RAPGEF2, RUNX2, CPS1, TAOK3, AGK, RANBP17, UBE2L3, SYN2, TYW1, LRGUK, GRM7, SEPTIN9, DNAH6, KIF4A, DHX32, UBE2G1, ABCB5, ADK, RPS6KA2, KYNU, KDM1B, DCLK1, SYT1, PARP15, AURKA, ABCG8, MAP4K4, ABCD2, BMPR1B, RAB8B, PAK3, TTLL7, ITPKB, TRPC5, PDE10A, UBE2 E2, HHAT, RNLS, DNM3, SCP2, SYN3, PRKCZ, MSH6, RAB27B, ABCA5, PDXDC1, RIPK4, MAPK1, KCNJ1, ABCD3, DNAH14, TRPC7, SYT10, UBE20, PI4K2B, RRGTT, CHD6, STK38, MYLK3, ACSBG1, DCAF1, TL K1, PPIP5K1, ARAP2, PAK5, DAPK1, NAV3, ACSM2B, STK32B, MAGI 1, ALPK2, DNAH11, RAB22A, MELK, RYR2, CLPX, SMARCA4, FAPB7, PARD3, MAPKAP1, EFTUD2, UBE2R2, BLK, OLA1, ATRX, NUA1, ABL 1, AGPS, SLC1A1, PRKAA1, TTLL5, MAST4, DNAH5, GUCY1A2, SLFN 11, RAP1A, ACSS3, MYO10, CAMK4, PLEKHA8, PEAK1, LATS2, ATP1 1C, DHX40, ABCB7, MUSK, ACTR3C, SMARCA1, ABCC12, PRKCE, WN K2, DGKB, ALPK3, ABCC9, P2RX6, TRIO, STXBP6, NLRP13, RPS6KA 3, ATP8A2, SCG5, RFC1, ATP8A1, STK38L, ABCC4, KIAA0232, FAN CM, FARS2, GTF2F2, MARK2, MSH2, MPPED2, GNAL, EPHA6, ATL1, H IPK3, ABCA10, GRK3, NOS2, AFG3L2, STK10, MYLK2, GBP6, FOLH1, STK32A, AK8, HIP1, GSR, PACSIN2, TARS3, MTHFD1L, SNX3, AQR, BLM, NRK, MAGI3, ADCY10, MYLK4, ATP9A, CDC42BPB, VRK1, GNA</p>                                                                                                                                                                                                                                                                                                                                                                                                                                                                                                                                                                                                                                                                                                                                                                                                                                                                                                                                                                 |

|            |                           |                      |                                                                                                                                                                                                                                                                                                                                                                                                                                                                                                                                                                                                                                                                                                                                                                                                                                                                                                                                                                                                                                                                                                                                                                                                                                                                                                                                                                                                                                                                                                                                                                                                                                                                                                                                                          |
|------------|---------------------------|----------------------|----------------------------------------------------------------------------------------------------------------------------------------------------------------------------------------------------------------------------------------------------------------------------------------------------------------------------------------------------------------------------------------------------------------------------------------------------------------------------------------------------------------------------------------------------------------------------------------------------------------------------------------------------------------------------------------------------------------------------------------------------------------------------------------------------------------------------------------------------------------------------------------------------------------------------------------------------------------------------------------------------------------------------------------------------------------------------------------------------------------------------------------------------------------------------------------------------------------------------------------------------------------------------------------------------------------------------------------------------------------------------------------------------------------------------------------------------------------------------------------------------------------------------------------------------------------------------------------------------------------------------------------------------------------------------------------------------------------------------------------------------------|
|            |                           |                      | <p> <i>I1, BMP2K, PDE6C, GNAQ, CLVS1, DSTYK, PFKFB4, NIN, DNAH8, TRIT1, GADL1, SMARCA2, CGAS, IDE, KIF21A, KIF15, RERGL, BTAF1, PEX6, NEK10, MX1, CLVS2, CFTR, ATP10B, MAP4K3, MYO3A, UBE2E1, SH3PXD2A, CDC42BPA, MAPK10, TXNRD2, TRPM6, PRKCH, HUNK, FRMPD4, RACGAP1, NLRC5, MKNK1, DMC1, MOK, RALB, MYO1D, ROCK1, LYN, PLEKHB2, KIF11, CHKA, RRAGD, CRACR2A, INSR, NEK6, DPYD, RPH3A, ABCA4, ERN2, SAMHD1, ENPP1, ENTPD5, UCK2, CSNK2A1, HCN1, PRKG1, GRIN2B, INO80, ETNPPL, KIF21B, ABCG1, HADHA, PSAP, ROR2, ACTR2, RIOK1, PRKAA2, DIRAS2, ERO1B, PLA2G4A, RAB12, KIFC1, IQGAP1, MORC2, THNSL2, HIPK1, DGKK, SNAP91, FICD, CENPE, TUBB6, AKT3, JAK2, ARL11, PRKCB, GOT2, KIF6, ABCC8, RFC2, NRBP1, ATP2B1, GAP43, IARS2, ASS1, SAR1A, ADCY9, MAST2, EXOC1, SDS, MAP2K6, DGKG, MYO18B, MAPK8, UBE2J2, RAPGEF4, HFM1, MYH13, ATP13A3, DHTKD1, UBE2QL1, ACACA, ST8SIA4, ARL4C, RXRA, MAP3K5, MAP3K4, PKN2, PDE2A, RAB38, SDCBP, PASK, FGR, TRIM23, ATP6V1B2, TOP1, EPHA4, PPIP5K2, NTRK2, AC SM2A, PLEKHA3, TRPM7, PTK2, MARK4, DNAH10, PITPNC1, RUNX1, ZFYVE1, ASAP1, PLCZ1, HKDC1, ACOXL, MDN1, FYN, BUB1, NLRP14, ARL13B, SCN8A, ALB, ATP9B, MAPK9, ROR1, PLEKHA2, EPHB1, DD X10, ADCK1, RPS6KA5, FCHSD2, PRKCA, GBP4, NLRP4, PCCA, POR, ABCA6, EFL1, BCR, RERG, NLRP8, KIF16B, SNRK, STK36, RRAS2, GNA14, RABL2A, EPHB2, CSNK1G1, DPH6, MYO5B, CDK14, MET, CAMK1G, AIFM3, KALRN, ME3, GNAS, MFHAS1, DHX29, ASTN2, DNAH3, AK3, DDX6, UPRT, DNAH17, ABL2, TTL11, CMPK1, PLCL1, ERBB4, PRKCQ, MYH15, AK9, NOS1, GLDC, CHD9, MTREX, RAB27A, KIF13A, DN AH9, MYO9B, ORC4, LARS2, RAD51B, CAMK1D, AK2, FER, AGAP1, ROCK2, NARS2, RAB31, PDK1, KIF7, CLCN5, PNPLA3, HSPA12A, STK3, PNPLA8, HNRNPU, IGF1R, KCNAB1, PRKAG2, ATP10A, SEPTIN6, DN M1L</i> </p> |
| GO:0004672 | protein kinase activity   | 5.513301307526684e-9 | <p> <i>MTOR, ULK2, NLK, KSR1, PIK3C3, ALK, MAP3K9, MYO3B, TNIK, NEK4, EGFR, CDK12, PRKACB, NEK7, NTRK3, FLT1, PRKD1, PAK1, EPHA7, TAOK3, RPS6KA2, DCLK1, AURKA, MAP4K4, BMPR1B, PAK3, PRKCZ, RIPK4, MAPK1, STK38, MYLK3, EFEMP1, DCAF1, TLK1, PAK5, DAPK1, STK32B, ALPK2, MELK, BLK, NUA1, ABL1, PRKAA1, MAST4, CAMK4, PEAK1, LATS2, MUSK, PRKCE, WNK2, ALPK3, TRIO, RPS6KA3, LTBP1, STK38L, MARK2, EPHA6, HIPK3, GRK3, STK10, MYLK2, CCND3, STK32A, CRIM1, NRK, MYLK4, CDC42BPB, VRK1, BMP2K, DSTYK, NEK10, MAP4K3, MYO3A, CDC42BPA, MAPK10, TRPM6, PRKCH, HUNK, MKNK1, MOK, ROCK1, LYN, CHKA, INSR, NEK6, ERN2, CSNK2A1, PRKG1, ROR2, RIOK1, SOSTDC1, PRKAA2, HIPK1, AKT3, JAK2, PRKCB, BRD4, NRBP1, MAST2, MAP2K6, MAPK8, MAP3K5, MAP3K4, PKN2, PASK, FGR, TOP1, EPHA4, NTRK2, TRPM7, PRKAB1, PTK2, MARK4, FYN, BUB1, MAPK9, ROR1, EPHB1, ADCK1, RPS6KA5, NRP1, PRKCA, BCR, SNRK, STK36, EPHB2, CSNK1G1, CDK14, MET, CAMK1G, KALRN, ABL2, ERBB4, PRKCQ, CAMK1D, FER, ROCK2, PDK1, STK3, IGF1R, PRKAG2, AKAP13</i> </p>                                                                                                                                                                                                                                                                                                                                                                                                                                                                                                                                                                                                                                                                                                                                |
| GO:0017076 | purine nucleotide binding | 6.420590105487593e-9 | <p> <i>MTOR, ABCA13, MYO9A, ULK2, NLK, LONP2, KSR1, MX2, ARL15, NUBPL, PDE4D, RALA, NME7, MYO5A, GPHN, PIK3C3, NAV2, MYO1E, ALK, ERCC6L2, HLCS, MAP3K9, MYO3B, MYO5C, TNIK, NEK4, EGFR, CDK12, PRKACB, NEK7, ATP2B2, NTRK3, FLT1, GK, THRAP3, DGKI, PRKD1, PAK1, EPHA7, ADSS2, RAPGEF2, RUNX2, CPS1, TAOK3, AGK, RANBP17, UBE2L3, SYN2, LRGUK, SEPTIN9, DNAH6, KIF4A, DHX32, UBE2G1, ABCB5, ADK, RPS6KA2, DCLK1, AURKA, ABCG1, PTK2, MARK4, ABCD2, BMPR1B, RAB8B, PAK3, TTL7, ITPKB, PDE10A, UBE2E2, HHA T, DNM3, SCP2, SYN3, PRKCZ, MSH6, RAB27B, ABCA5, RIPK4, MAPK1, KCNJ1, ABCD3, DNAH14, UBE2O, PI4K2B, RNGTT, CHD6, STK38, MYLK3, ACSBG1, DCAF1, TLK1, PPIP5K1, PAK5, DAPK1, NAV3, ACSM2B, STK32B, MAGI1, ALPK2, DNAH11, RAB22A, MELK, CLPX, SMARCA4, EFTUD2, UBE2R2, BLK, OLA1, ATRX, NUA1, ABL1, PRKAA1, TTL5, MAST4, DNAH5, GUCY1A2, SLFN11, RAP1A, ACSS3, MYO10, CAMK4, PEAK1, LATS2, ATP11C, DHX40, ABCB7, MUSK, ACTR3C, SMARCAD1, ABCC12, PRKCE, WNK2, DGKB, ALPK3, ABCC9, P2RX6, TRIO, NLRP13, RPS6KA3, ATP8A2, SCG5, RFC1, ATP8A1, STK38L, ABCC4, KIAA0232, FANCM, FARS2, GTF2F2, MARK2, MSH2, MPPED2, GNAL, EPHA6, ATL1, HIPK3, ABCA10, GRK3, AFG3L2, STK10, MYLK2, GBP6, STK32A, AK8, TARS3, MTHFD1L, AQR, BLM, NRK, MAGI3, ADCY</i> </p>                                                                                                                                                                                                                                                                                                                                                                                                                                                                                                |

|            |                                 |                      |                                                                                                                                                                                                                                                                                                                                                                                                                                                                                                                                                                                                                                                                                                                                                                                                                                                                                                                                                                                                                                                                                                                                                                                                                                                                                                                                                                                                                                                                                                                                                                                                                                                                                                                                                                                                                                                                                                                                                                                                                                                                                                                                                                                                                                      |
|------------|---------------------------------|----------------------|--------------------------------------------------------------------------------------------------------------------------------------------------------------------------------------------------------------------------------------------------------------------------------------------------------------------------------------------------------------------------------------------------------------------------------------------------------------------------------------------------------------------------------------------------------------------------------------------------------------------------------------------------------------------------------------------------------------------------------------------------------------------------------------------------------------------------------------------------------------------------------------------------------------------------------------------------------------------------------------------------------------------------------------------------------------------------------------------------------------------------------------------------------------------------------------------------------------------------------------------------------------------------------------------------------------------------------------------------------------------------------------------------------------------------------------------------------------------------------------------------------------------------------------------------------------------------------------------------------------------------------------------------------------------------------------------------------------------------------------------------------------------------------------------------------------------------------------------------------------------------------------------------------------------------------------------------------------------------------------------------------------------------------------------------------------------------------------------------------------------------------------------------------------------------------------------------------------------------------------|
|            |                                 |                      | <p>10,MYLK4,ATP9A,CDC42BPB,VRK1,GNAI1,BMP2K,PDE6C,GNAQ,DSTYK,PFKFB4,NIN,DNAH8,TRIT1,SMARCA2,CGAS,IDE,KIF21A,KIF15,RERGL,BTAF1,PEX6,NEK10,MX1,CFTR,ATP10B,MAP4K3,MYO3A,UBE2E1,CDC42BPA,MAPK10,TRPM6,PRKCH,HUNK,NLRC5,MKNK1,DMC1,MOK,RALB,MYO1D,ROCK1,LYN,KIF11,CHKA,RRAGD,CRACR2A,INSR,NEK6,ABCA4,ERN2,SAMHD1,ENPP1,ENTPD5,UCK2,CSNK2A1,HCN1,PRKG1,INO80,KIF21B,ABCG1,HADHA,ROR2,ACTR2,RIOK1,PRKAA2,DIRAS2,RAB12,KIFC1,MORC2,HIPK1,DGKK,FICD,CENPE,TUBB6,AKT3,JAK2,ARL11,PRKCB,KIF6,ABCC8,RFC2,NRBP1,ATP2B1,IARS2,ASS1,SAR1A,ADCY9,MAST2,MAP2K6,DGKG,MYO18B,MAPK8,UBE2J2,RAPGEF4,HFM1,MYH13,ATP13A3,UBE2QL1,ACACA,ARL4C,MAP3K5,MAP3K4,PKN2,PDE2A,RAB38,PASK,FGR,TRIM23,ATP6V1B2,TOPI,EPHA4,PPIP5K2,NTRK2,ACSM2A,TRPM7,PTK2,MARK4,DNAH10,RUNX1,HKDC1,MDN1,FYN,BUB1,NLRP14,ARL13B,SCN8A,ATP9B,MAPK9,ROR1,EPHB1,DDX10,ADCK1,RPS6KA5,PRKCA,GBP4,NLRP4,PCCA,ABCA6,EFL1,BCR,RERG,NLRP8,KIF16B,SNRK,STK36,RRAS2,GNA14,RABL2A,EPHB2,CSNK1G1,DPH6,MYO5B,CDK14,MET,CAMK1G,KALRN,GNAS,MFHAS1,DHX29,DNAH3,AK3,DDX6,UPT,DDNAH17,ABL2,TTLL11,CMPK1,ERBB4,PRKCQ,MYH15,AK9,CHD9,MTREX,RAB27A,KIF13A,DNAH9,MYO9B,ORC4,LARS2,RAD51B,CAMK1D,AK2,FER,AGAP1,ROCK2,NARS2,RAB31,PDK1,KIF7,CLCN5,PNPLA3,HSPA12A,STK3,PNPLA8,HNRNPU,IGF1R,PRKAG2,ATP10A,SEPTIN6,DNM1L</p>                                                                                                                                                                                                                                                                                                                                                                                                                                                                                                                                                                                                                                                                                                                                                                                                                                                                                                                                                                                      |
| GO:0097367 | carbohydrate derivative binding | 1.044298773101908e-8 | <p>MTOR,ABCA13,SMOC1,MYO9A,ULK2,NLK,LONP2,KSR1,MX2,LIP1,ARL15,NUBPL,PDE4D,RALA,NME7,MYO5A,FBN1,GPHN,PIK3C3,NAV2,MYO1E,ALK,COL25A1,ERCC6L2,HLCS,MAP3K9,MYO3B,MYO5C,TNIK,NEK4,EGFR,CDK12,PRKACB,NEK7,ATP2B2,NTRK3,FLT1,GK,THRAP3,EVA1C,DGKI,NELL2,PRKD1,PAK1,EPHA7,ADSS2,RAPGEF2,RUNX2,FGF12,CPS1,TAOK3,AGK,RANBP17,UBE2L3,SYN2,TYW1,LRGUK,SEPTIN9,DNAH6,KIF4A,DHX32,UBE2G1,APP,ABCB5,ADK,RPS6KA2,DCLK1,SEMA5A,AURKA,ABCG8,MAP4K4,ABCD2,BMPR1B,PCSK6,RAB8B,PAK3,TTLL7,ITPKB,PDE10A,UBE2E2,HHAT,DNM3,SCP2,SYN3,PRKCZ,MSH6,RAB27B,ABCA5,RIPK4,MAPK1,KCNJ1,ABCD3,DNAH14,CRISPLD2,UBE20,PI4K2B,RNGTT,CHD6,STK38,MYLK3,ACSBG1,PAFAH1B1,DCAF1,TLK1,PPIP5K1,ADAMTS3,PAK5,DAPK1,NAV3,ACSM2B,STK32B,MAGI1,ALPK2,DNAH11,RAB22A,MELK,CLPX,SMARCA4,EFTUD2,UBE2R2,BLK,COL23A1,OLA1,ATRX,NUAK1,ABL1,PRKAA1,DROSHA,TTLL5,MAST4,DNAH5,GUCY1A2,SLFN11,RAP1A,ACSS3,MYO10,CAMK4,PLEKHA8,FGF10,PEAK1,LATS2,ATP11C,DHX40,ABCB7,MUSK,ACTR3C,SMARCA1,ABCC12,PRKCE,WNK2,DGKB,CD44,ALPK3,ABCC9,P2RX6,TRIO,COL5A3,NLRP13,RPS6KA3,ATP8A2,SCG5,RFC1,ATP8A1,STK38L,ABCC4,KIAA0232,FANCM,FARS2,GTTF2F2,MARK2,MSH2,MPPED2,GNAL,EPHA6,ATL1,HIPK3,ABCA10,GRK3,NOS2,AFG3L2,STK10,MYLK2,GBP6,STK32A,AK8,EGFLAM,TARS3,MTHFD1L,AQR,BLM,NRK,MAGI3,ADCY10,MYLK4,ATP9A,CDC42BPB,VRK1,GNAI1,BMP2K,PDE6C,HMGB1,GNAQ,FGF9,DSTYK,PFKFB4,NIN,DNAH8,TRIT1,SMARCA2,CGAS,SMOC2,IDE,KIF21A,KIF15,RERGL,BTAF1,PEX6,NEK10,MX1,COL5A1,CFTR,NELL1,ATP10B,MAP4K3,MYO3A,UBE2E1,CDC42BPA,MAPK10,TRPM6,PRKCH,HUNK,NLRC5,MKNK1,DMC1,PSMA1,MOK,RALB,MYO1D,ROCK1,LYN,CTSB,KIF11,ADA2,CHKA,RRAGD,CRACR2A,INSR,NEK6,COLQ,PIGK,ABCA4,ERN2,SAMHD1,ENPP1,ENTPD5,UCK2,CSNK2A1,HCN1,PRKG1,INO80,KIF21B,ABCG1,HADHA,PSAP,ROR2,CFH,ACTR2,RIOK1,PRKAA2,DIRAS2,RAB12,KIFC1,REG4,MORC2,HIPK1,DGKK,FICD,CENPE,TUBB6,AKT3,JAK2,FSTL1,MPPE1,ARL11,ADAMTS5,PRKCB,KIF6,ABCC8,RFC2,NRBP1,ATP2B1,GAP43,IARS2,ASS1,SAR1A,ADCY9,MAST2,HPS2,MAP2K6,DGKG,MYO18B,CEMIP,MAPK8,UBE2J2,RAPGEF4,HFM1,MYH13,ATP13A3,UBE2QL1,ACACA,ST8SIA4,ARL4C,ADGRB1,MAP3K5,MAP3K4,PKN2,PDE2A,RAB38,SDCBP,PASK,FGR,TRIM23,ATP6V1B2,TOPI,EPHA4,PPIP5K2,NTRK2,ACSM2A,POSTN,TRPM7,PTK2,MARK4,DNAH10,RUNX1,HKDC1,MDN1,FYN,BUB1,NLRP14,ARL13B,SCN8A,ATP9B,UGP2,MAPK9,ROR1,EPHB1,DDX10,ADCK1,RPS6KA5,NRP1,PRKCA,GBP4,NLRP4,PCCA,POR,ABCA6,EFL1,</p> |

|            |                                            |                       |                                                                                                                                                                                                                                                                                                                                                                                                                                                                                                                                                                                                                                                                                                                                                                                                                                                                                                                                                                                                                                                                                                                                                                                                                                                |
|------------|--------------------------------------------|-----------------------|------------------------------------------------------------------------------------------------------------------------------------------------------------------------------------------------------------------------------------------------------------------------------------------------------------------------------------------------------------------------------------------------------------------------------------------------------------------------------------------------------------------------------------------------------------------------------------------------------------------------------------------------------------------------------------------------------------------------------------------------------------------------------------------------------------------------------------------------------------------------------------------------------------------------------------------------------------------------------------------------------------------------------------------------------------------------------------------------------------------------------------------------------------------------------------------------------------------------------------------------|
|            |                                            |                       | BCR, RERG, NLRP8, KIF16B, SNRK, STK36, RRAS2, GNA14, RABL2A, EPHB2, CSNK1G1, DPH6, MYO5B, CDK14, MET, CAMK1G, KALRN, GNAS, LAMA1, MFHAS1, DHX29, BMP7, CHIT1, DNAH3, AK3, DDX6, UPR, T, DNAH17, ABL2, TTLL11, SLIT2, CMPK1, ERBB4, PRKCQ, MYH15, AK9, NOS1, CHD9, MTREX, VCAN, RAB27A, SLIT3, KIF13A, DNAH9, MYO9B, ORC4, LARS2, RAD51B, CAMK1D, AK2, FER, OARD1, SPOCK3, AGAP1, ROCK2, NARS2, RAB31, PDK1, KIF7, CLCN5, PNPLA3, HSPA12A, STK3, PNPLA8, HNRNPU, IGF1R, PRKAG2, ATP10A, SEPTIN6, DNML1                                                                                                                                                                                                                                                                                                                                                                                                                                                                                                                                                                                                                                                                                                                                          |
| GO:0003779 | actin binding                              | 1.2134991759225245e-8 | NEBL, MYO9A, SVIL, TLN2, MICAL3, RDX, MYO5A, KCNMA1, SPIRE1, FGD4, MYO1E, PARVB, MYO3B, MYO5C, EGFR, MACF1, CTNNA3, DIAPH3, PHACTR1, CTNNA1, EPB41L3, PHACTR2, CACNB2, VCL, FMN2, HOMER2, CTNNA2, TRPC5, CALD1, SNTG2, KLHL1, MRTFA, COBL, ABLIM1, CORO2B, LIMCH1, FMN1, TPM1, NF2, CTNNA1, PPP1R9A, MR, TFB, MPRIP, ENAH, SYNE2, AIF1L, LDB3, DST, XIRP2, ABL1, GAS2, MYO10, SYNE1, ACTR3C, PRKCE, STK38L, TMOD2, SNTG1, MYOM2, KLHL4, HIP1, PDLIM5, PHACTR3, MYRIP, MYOM1, PLS1, MYO3A, PRKN, AFAP1, MYO1D, SHROOM3, FLNB, UTRN, INO80, MICALL2, TLNRD1, ACTR2, PACRG, VASP, IQGAP1, LASP1, ANLN, SMTN, USH1C, SHROOM2, MYO18B, IMPACT, MYH13, WASF3, NCK1, TNNI1, TRPM7, PT, K2, DIAPH1, CYFIP1, PSTPIP2, CCDC88A, SNTB1, RAI14, SPTB, MYO5B, NRAP, ABL2, PKNOX2, FHOD3, IPP, ANTXR1, MYH15, GAS2L1, MYO9B, FER, SNTB2, EPS8, WASHC1, HNRNPU                                                                                                                                                                                                                                                                                                                                                                                                |
| GO:0005085 | guanyl-nucleotide exchange factor activity | 4.134771020392312e-8  | BCAR3, FGD4, RIN2, DOCK10, DENND1A, DOCK2, RALGPS1, RAPGEF2, HERC2, RAPGEF5, DOCK8, RAP1GDS1, ARHGEF17, ECT2L, RASGRF2, RGL1, TIAM1, ARHGEF12, RIC8B, DOCK4, RAP1A, DENND2B, RASGRF1, DENND4C, EGF, TRIO, MCF2L, ARHGEF7, HERC1, KNDC1, DOCK5, PLCE1, VAV1, IQSEC1, RIN3, SH3BP5, DOCK1, PSD3, FARP1, NGEF, ALS2, DOCK9, VAV3, ITS2, ARHGEF28, DENND2C, EIF2B3, ARFGEF1, RALGPS2, RASGRP1, RASGEF1C, NET1, MADD, ARFGEF3, RAPGEF4, DNMBP, CYTH4, RASGEF1B, CCDC88A, SH2D3C, DOCK3, BCR, ELMO1, KALRN, TIAM2, GAPVD1, WDR41, ARHGEF11, RAB3GAP2, AKAP13                                                                                                                                                                                                                                                                                                                                                                                                                                                                                                                                                                                                                                                                                         |
| GO:0016301 | kinase activity                            | 9.794797760977386e-8  | MTOR, ULK2, NLK, KSR1, NME7, PIK3C3, ALK, MAP3K9, MYO3B, TNF, K, NEK4, EGFR, CDK12, PRKACB, NEK7, SGMS1, NTRK3, FLT1, GK, DGKI, PRKD1, PAK1, EPHA7, TAOK3, AGK, LR, GUK, ADK, RPS6KA2, DCLK1, AURKA, MAP4K4, BMPR1B, PAK3, ITPKB, PRKCZ, RIPK4, MAPK1, PI4K2B, STK38, MYLK3, EFEMP1, DCAF1, TLK1, PPIP5K1, PAK5, DAPK1, STK32B, ALPK2, MELK, MAPKAP1, BLK, NUA1, ABL1, PRKAA1, MAST4, CAMK4, PEAK1, LATS2, MUSK, PRKCE, WNK2, DGKB, ALPK3, TRIO, RPS6KA3, LTBP1, STK38L, MARK2, EPHA6, SH3KBP1, HIPK3, CDKN2C, GRK3, STK10, MYLK2, CCND3, STK32A, AK8, CRIM1, NRK, MAGI3, MYLK4, CDC42BPB, VRK1, BMP2K, DSTYK, PFKFB4, NEK10, MAP4K3, MYO3A, AKAP10, CDC42BPA, MAPK10, TRPM6, PRKCH, HUNK, MKNK1, MOK, ROCK1, LYN, CHKA, INSR, NEK6, ERN2, UCK2, CSNK2A1, PRKG1, ROR2, RIOK1, SOSTDC1, PRKAA2, HIPK1, DGKK, AKT3, JAK2, PRKCB, BRD4, NRBP1, MAST2, MAP2K6, DGKG, MAPK8, MAP3K5, MAP3K4, PKN2, PASK, FGR, TOP1, EPHA4, PPIP5K2, NTRK2, TRPM7, PRKAB1, PTK2, MARK4, CNKSR1, HKDC1, FYN, BUB1, MAPK9, ROR1, EPHB1, ADCK1, RPS6KA5, NRP1, PRKCA, BCR, SNRK, PG, M2L1, STK36, EPHB2, CSNK1G1, CDK14, MET, DLG2, CAMK1G, MAGI2, KALRN, AK3, ABL2, CMPK1, ERBB4, PRKCQ, AK9, CAMK1D, PIK3R3, AK2, FER, FGGY, ROCK2, PDK1, STK3, IGF1R, PRKAG2, AKAP13 |
| GO:0000166 | nucleotide binding                         | 1.2970245248273205e-7 | MTOR, ABCA13, MYO9A, ULK2, NLK, LONP2, KSR1, MX2, ARL15, MICAL3, NUBPL, PDE4D, RALA, NME7, MYO5A, GPHN, PIK3C3, NAV2, MYO1E, ALK, ERCC6L2, HLCS, MAP3K9, MYO3B, MYO5C, TNF, K, NEK4, EGFR, CDK12, PRKACB, NEK7, ATP2B2, NTRK3, FLT1, GK, THRAP3, DGKI, PRKD1, PAK1, GMDS, EPHA7, ADSS2, RAPGEF2, RUNX2, CPS1, TAOK3, AGK, RANBP17, UBE2L3, SYN2, TYW1, LR, GUK, SEPTIN9, DN, AH6, KIF4A, DHX32, UBE2G1, ABCB5, ADK, RPS6KA2, KDM1B, DCLK1, PARP15, AURKA, ABCG8, MAP4K4, ABCD2, BMPR1B, RAB8B, PAK3, TTLL7, ITPKB, PDE10A, UBE2E2, HHAT, RNLS, DN, M3, SCP2, SYN3, PRKCZ, MSH6, RAB27B, ABCA5, RIPK4, MAPK1, KCNJ1, ABCD3, DN, AH14, UBE2O, PI4K2B, R, NGTT, CHD6, STK38, MYLK3, ACSBG1, DCAF1, TLK1, PPIP5K1, PAK5, DAPK1, NAV3, ACSM2B, STK32B, MAGI1, ALPK2, DNAH11, RAB22A, MELK, CLPX, SMARCA4, EFTUD2, UBE2R                                                                                                                                                                                                                                                                                                                                                                                                                             |

|            |                              |                      |                                                                                                                                                                                                                                                                                                                                                                                                                                                                                                                                                                                                                                                                                                                                                                                                                                                                                                                                                                                                                                                                                                                                                                                                                                                                                                                                                                                                                                                                                                                                                                                                                                                                                                                                                                                                                                                                                                                                                                                                                                                                                                            |
|------------|------------------------------|----------------------|------------------------------------------------------------------------------------------------------------------------------------------------------------------------------------------------------------------------------------------------------------------------------------------------------------------------------------------------------------------------------------------------------------------------------------------------------------------------------------------------------------------------------------------------------------------------------------------------------------------------------------------------------------------------------------------------------------------------------------------------------------------------------------------------------------------------------------------------------------------------------------------------------------------------------------------------------------------------------------------------------------------------------------------------------------------------------------------------------------------------------------------------------------------------------------------------------------------------------------------------------------------------------------------------------------------------------------------------------------------------------------------------------------------------------------------------------------------------------------------------------------------------------------------------------------------------------------------------------------------------------------------------------------------------------------------------------------------------------------------------------------------------------------------------------------------------------------------------------------------------------------------------------------------------------------------------------------------------------------------------------------------------------------------------------------------------------------------------------------|
|            |                              |                      | <p>2, BLK, OLA1, ATRX, NUA1, ABL1, AGPS, PRKAA1, TTLL5, APLF, MAST4, DNAH5, GUCY1A2, SLFN11, RAP1A, ACSS3, MYO10, CAMK4, PEAK1, LATS2, ATP11C, DHX40, ABCB7, MUSK, ACTR3C, SMARCA1, ABCC12, PRKCE, WNK2, DGKB, ALPK3, ABCC9, P2RX6, TRIO, NLRP13, RPS6KA3, ATP8A2, SCG5, RFC1, ATP8A1, STK38L, ABCC4, KIAA0232, FANCM, FARS2, GTF2F2, MARK2, MSH2, MPPED2, GNAL, EPHA6, ATL1, HIPK3, ABCA10, GRK3, NOS2, AFG3L2, STK10, MYLK2, GBP6, STK32A, AK8, GSR, TARS3, MTHFD1L, AQR, BLM, NRK, MAGI3, ADCY10, MYLK4, ATP9A, CDC42BPB, VRK1, GNAI1, BMP2K, PDE6C, GNAQ, DSTYK, PFKFB4, NIN, DNAH8, TRIT1, SMARCA2, CGAS, IDE, KIF21A, KIF15, RERGL, BTAF1, PEX6, NEK10, MX1, CFTR, ME2, ATP10B, MAP4K3, MYO3A, UBE2E1, CDC42BPA, MAPK10, TXNRD2, TRPM6, PRKCH, HUNK, NLRC5, DHRS11, MKNK1, DMC1, MOK, RALB, MYO1D, ROCK1, LYN, KIF11, ZBTB33, CHKA, RRAGD, CRACR2A, INSR, NEK6, DPYD, ABCA4, ERN2, SAMHD1, ENPP1, ENTPD5, MOCS2, UCK2, CSNK2A1, HCN1, PRKG1, INO80, DHRS3, KIF21B, ABCG1, HADHA, ROR2, ACTR2, RIOK1, PRKAA2, DIRAS2, ERO1B, RAB12, KIFC1, MORC2, HIPK1, DGKK, FICD, CENPE, TUBB6, AKT3, JAK2, ZBTB38, ARL11, PRKCB, KIF6, ABCC8, RFC2, ZBTB21, NRBP1, ATP2B1, IARS2, ASS1, SAR1A, ADCY9, MAST2, MAP2K6, DGKG, MYO18B, MAPK8, UBE2J2, RAPGEF4, HFM1, MYH13, ATP13A3, UBE2QL1, ACACA, ARL4C, MAP3K5, MAP3K4, PKN2, PDE2A, RAB38, PASK, FGR, TRIM23, ATP6V1B2, TOP1, TINAG, EPHA4, PPIP5K2, NTRK2, ACSM2A, TRPM7, PTK2, MARK4, DNAH10, RUNX1, SLC27A6, HKDC1, ACOXL, MDN1, FYN, BUB1, NLRP14, ARL13B, SCN8A, ATP9B, UGP2, MAPK9, ROR1, TET1, EPHB1, DDX10, ADCK1, RPS6KA5, PRKCA, GBP4, NLRP4, FHIT, PCCA, POR, ABCA6, EFL1, BCR, RERG, NLRP8, KIF16B, SNRK, STK36, RRAS2, GNA14, RABL2A, EPHB2, CSNK1G1, DPH6, MYO5B, CDK14, MET, CAMK1G, AIFM3, KALRN, ME3, GNAS, MFHAS1, DHX29, DNAH3, AK3, DDX6, UPRT, DNAH17, ABL2, TTLL11, CMPK1, ERBB4, PRKCQ, MYH15, AK9, NOS1, CHD9, MTREX, RAB27A, KIF13A, DNAH9, MYO9B, ORC4, LARS2, RAD51B, CAMK1D, AK2, FER, CHFR, AGAP1, ROCK2, NARS2, RAB31, PDK1, KIF7, CLCN5, PNPLA3, HSPA12A, STK3, PNPLA8, HNRNPU, IGF1R, KCNAB1, PRKAG2, ATP10A, SEPTIN6, DNMI1</p> |
| GO:1901265 | nucleoside phosphate binding | 1.379783838549978e-7 | <p>MTOR, ABCA13, MYO9A, ULK2, NLK, LONP2, KSR1, MX2, ARL15, MICAL3, NUBPL, PDE4D, RALA, NME7, MYO5A, GPHN, PIK3C3, NAV2, MYO1E, ALK, ERCC6L2, HLCS, MAP3K9, MYO3B, MYO5C, TNIK, NEK4, EGFR, CDK12, PRKACB, NEK7, ATP2B2, NTRK3, FLT1, GK, THRAP3, DGKI, PRKD1, PAK1, GMDS, EPHA7, ADSS2, RAPGEF2, RUNX2, CPS1, TAOK3, AGK, RANBP17, UBE2L3, SYN2, TYW1, LRGUK, SEPTIN9, DNAH6, KIF4A, DHX32, UBE2G1, ABCB5, ADK, RPS6KA2, KDM1B, DCLK1, PARP15, AURKA, ABCG8, MAP4K4, ABCD2, BMPR1B, RAB8B, PAK3, TTLL7, ITPKB, PDE10A, UBE2E2, HHAT, RNLS, DNM3, SCP2, SYN3, PRKCZ, MSH6, RAB27B, ABCA5, RIPK4, MAPK1, KCNJ1, ABCD3, DNAH14, UBE2O, PI4K2B, RINGT, CHD6, STK38, MYLK3, ACSBG1, DCAF1, TLK1, PPIP5K1, PAK5, DAPK1, NAV3, ACSM2B, STK32B, MAGI1, ALPK2, DNAH11, RAB22A, MELK, CLPX, SMARCA4, EFTUD2, UBE2R2, BLK, OLA1, ATRX, NUA1, ABL1, AGPS, PRKAA1, TTLL5, APLF, MAST4, DNAH5, GUCY1A2, SLFN11, RAP1A, ACSS3, MYO10, CAMK4, PEAK1, LATS2, ATP11C, DHX40, ABCB7, MUSK, ACTR3C, SMARCA1, ABCC12, PRKCE, WNK2, DGKB, ALPK3, ABCC9, P2RX6, TRIO, NLRP13, RPS6KA3, ATP8A2, SCG5, RFC1, ATP8A1, STK38L, ABCC4, KIAA0232, FANCM, FARS2, GTF2F2, MARK2, MSH2, MPPED2, GNAL, EPHA6, ATL1, HIPK3, ABCA10, GRK3, NOS2, AFG3L2, STK10, MYLK2, GBP6, STK32A, AK8, GSR, TARS3, MTHFD1L, AQR, BLM, NRK, MAGI3, ADCY10, MYLK4, ATP9A, CDC42BPB, VRK1, GNAI1, BMP2K, PDE6C, GNAQ, DSTYK, PFKFB4, NIN, DNAH8, TRIT1, SMARCA2, CGAS, IDE, KIF21A, KIF15, RERGL, BTAF1, PEX6, NEK10, MX1, CFTR, ME2, ATP10B, MAP4K3, MYO3A, UBE2E1, CDC42BPA, MAPK10, TXNRD2, TRPM6, PRKCH, HUNK, NLRC5, DHRS11, MKNK1, DMC1, MOK, RALB, MYO1D, ROCK1, LYN, KIF11, ZBTB33, CHKA, RRAGD, CRACR2A, INSR, NEK6, DPYD, ABCA4, ERN2, SAMHD1, ENPP1, ENTPD5, MOCS2, UCK2, CSNK2A1, HCN1, PRKG1, INO80, DHRS3, KIF21B, ABCG1, HADHA, ROR2, ACTR2, RIOK1, PRKAA2, DIRAS2, ERO1B, RAB12, KIFC1, MORC2, HIPK1, DGKK, FICD, CENPE, TUBB6, AKT3, JAK2, ZBTB38, ARL11, PRKCB, KIF6, ABCC8, RFC2, ZBTB21, NRBP1, ATP2B1, IARS2, AS</p>                                                                                                                    |

|            |                                                        |                          |                                                                                                                                                                                                                                                                                                                                                                                                                                                                                                                                                                                                                                                                                                                                                                                                                                                                                                                                                                                                                                                                                                                  |
|------------|--------------------------------------------------------|--------------------------|------------------------------------------------------------------------------------------------------------------------------------------------------------------------------------------------------------------------------------------------------------------------------------------------------------------------------------------------------------------------------------------------------------------------------------------------------------------------------------------------------------------------------------------------------------------------------------------------------------------------------------------------------------------------------------------------------------------------------------------------------------------------------------------------------------------------------------------------------------------------------------------------------------------------------------------------------------------------------------------------------------------------------------------------------------------------------------------------------------------|
|            |                                                        |                          | <p>S1, SAR1A, ADCY9, MAST2, MAP2K6, DGKG, MYO18B, MAPK8, UBE2J2, RAPGEF4, HFM1, MYH13, ATP13A3, UBE2QL1, ACACA, ARL4C, MAP3K5, MAP3K4, PKN2, PDE2A, RAB38, PASK, FGR, TRIM23, ATP6V1B2, TOP1, TINAG, EPHA4, PPIP5K2, NTRK2, ACSM2A, TRPM7, PTK2, MARK4, DNAH10, RUNX1, SLC27A6, HKDC1, ACOXL, MDN1, FYN, BUB1, NLRP14, ARL13B, SCN8A, ATP9B, UGP2, MAPK9, ROR1, TET1, EPHB1, DDX10, ADCK1, RPS6KA5, PRKCA, GBP4, NLRP4, FHIT, PCCA, POR, ABCA6, EFL1, BCR, RERG, NLRP8, KIF16B, SNRK, STK36, RRAS2, GNA14, RABL2A, EPHB2, CSNK1G1, DPH6, MYO5B, CDK14, MET, CAMK1G, AIFM3, KALRN, ME3, GNAS, MFHAS1, DHX29, DNAH3, AK3, DDX6, UPRT, DNAH17, ABL2, TLL11, CMPK1, ERBB4, PRKCQ, MYH15, AK9, NOS1, CHD9, MTREX, RAB27A, KIF13A, DNAH9, MYO9B, ORC4, LARS2, RAD51B, CAMK1D, AK2, FER, CHFR, AGAP1, ROCK2, NARS2, RAB31, PDK1, KIF7, CLCN5, PNPLA3, HSPA12A, STK3, PNPLA8, HNRNP, IGF1R, KCNAB1, PRKAG2, ATP10A, SEPTIN6, DNMI1</p>                                                                                                                                                                                   |
| GO:0106310 | protein serine kinase activity                         | 1.3910676589766532e-7    | <p>MTOR, ULK2, NLK, KSR1, MAP3K9, MYO3B, TNIK, NEK4, CDK12, PRKACB, NEK7, PRKD1, PAK1, TAOK3, RPS6KA2, DCLK1, AURKA, MAP4K4, PAK3, PRKCZ, RIPK4, MAPK1, STK38, DCAF1, TLK1, PAK5, DAPK1, STK32B, ALPK2, MELK, NUA1, PRKAA1, MAST4, CAMK4, LATS2, PRKCE, WNK2, ALPK3, TRIO, RPS6KA3, STK38L, MARK2, HIPK3, STK10, STK32A, NRK, MYLK4, CDC42BPB, VRK1, BMP2K, DSTYK, NEK10, MAP4K3, MYO3A, CDC42BPA, MAPK10, TRPM6, PRKCH, HUNK, MKNK1, MOK, ROCK1, NEK6, ERN2, CSNK2A1, PRKG1, RIOK1, PRKAA2, HIPK1, AKT3, PRKCB, MAST2, MAP2K6, MAPK8, MAP3K4, PKN2, PASK, TRPM7, MARK4, BUB1, MAPK9, RPS6KA5, PRKCA, BCR, SNRK, STK36, CSNK1G1, CDK14, CAMK1G, KALRN, PRKCQ, CAMK1D, ROCK2, STK3</p>                                                                                                                                                                                                                                                                                                                                                                                                                            |
| GO:0016773 | phosphotransferase activity, alcohol group as acceptor | 1.5083398205108067e-7    | <p>MTOR, ULK2, NLK, KSR1, PIK3C3, ALK, MAP3K9, MYO3B, TNIK, NEK4, EGFR, CDK12, PRKACB, NEK7, NTRK3, FLT1, GK, DGKI, PRKD1, PAK1, EPHA7, TAOK3, AGK, ADK, RPS6KA2, DCLK1, AURKA, MAP4K4, BMPR1B, PAK3, ITPKB, PRKCZ, RIPK4, MAPK1, PI4K2B, STK38, MYLK3, EFEMP1, DCAF1, TLK1, PAK5, DAPK1, STK32B, ALPK2, MELK, BLK, NUA1, ABL1, PRKAA1, MAST4, CAMK4, PEAK1, LATS2, MUSK, PRKCE, WNK2, DGKB, ALPK3, TRIO, RPS6KA3, LTBP1, STK38L, MARK2, EPHA6, HIPK3, GRK3, STK10, MYLK2, CCND3, STK32A, CRIM1, NRK, MYLK4, CDC42BPB, VRK1, BMP2K, DSTYK, PFKFB4, NEK10, MAP4K3, MYO3A, CDC42BPA, MAPK10, TRPM6, PRKCH, HUNK, MKNK1, MOK, ROCK1, LYN, CHKA, INSR, NEK6, ERN2, UCK2, CSNK2A1, PRKG1, ROR2, RIOK1, SOSTDC1, PRKAA2, HIPK1, DGKK, AKT3, JAK2, PRKCB, BRD4, NRBP1, MAST2, MAP2K6, DGKG, MAPK8, MAP3K5, MAP3K4, PKN2, PASK, FGR, TOP1, EPHA4, NTRK2, TRPM7, PRKAB1, PTK2, MARK4, HKDC1, FYN, BUB1, MAPK9, ROR1, EPHB1, ADCK1, RPS6KA5, NRP1, PRKCA, BCR, SNRK, PGM2L1, STK36, EPHB2, CSNK1G1, CDK14, MET, CAMK1G, KALRN, ABL2, ERBB4, PRKCQ, CAMK1D, PIK3R3, FER, FGGY, ROCK2, PDK1, STK3, IGF1R, PRKAG2, AKAP13</p> |
| GO:0004674 | protein serine/threonine kinase activity               | 5.283088762016135e-7     | <p>MTOR, ULK2, NLK, KSR1, MAP3K9, MYO3B, TNIK, NEK4, EGFR, CDK12, PRKACB, NEK7, PRKD1, PAK1, TAOK3, RPS6KA2, DCLK1, AURKA, MAP4K4, BMPR1B, PAK3, PRKCZ, RIPK4, MAPK1, STK38, MYLK3, DCAF1, TLK1, PAK5, DAPK1, STK32B, ALPK2, MELK, NUA1, PRKAA1, MAST4, CAMK4, LATS2, PRKCE, WNK2, ALPK3, TRIO, RPS6KA3, LTBP1, STK38L, MARK2, HIPK3, GRK3, STK10, MYLK2, CCND3, STK32A, NRK, MYLK4, CDC42BPB, VRK1, BMP2K, DSTYK, MKN10, MAP4K3, MYO3A, CDC42BPA, MAPK10, TRPM6, PRKCH, HUNK, NEK11, MOK, ROCK1, NEK6, ERN2, CSNK2A1, PRKG1, RIOK1, SOSTDC1, PRKAA2, HIPK1, AKT3, PRKCB, BRD4, MAST2, MAP2K6, MAPK8, MAP3K5, MAP3K4, PKN2, PASK, TOP1, TRPM7, MARK4, BUB1, MAPK9, ADCK1, RPS6KA5, PRKCA, BCR, SNRK, STK36, CSNK1G1, CDK14, CAMK1G, KALRN, PRKCQ, CAMK1D, ROCK2, STK3, PRKAG2, AKAP13</p>                                                                                                                                                                                                                                                                                                                        |
| GO:0045296 | cadherin binding                                       | 0.0000035000607915707286 | <p>RDX, ERC1, EPS15L1, CDH8, CRKL, PTPRJ, EGFR, MACF1, CTNNA3, DIAPH3, SND1, CDH4, CAST, CTNNAL1, SEPTIN9, VCL, CD2AP, CTNNA2, LARP1, CALD1, PDXDC1, STK38, CTNNA1, CDH7, MRTFB, MPRI, CDH11, USP8, OLA1, PTPRT, CDH18, ZC3H4V1, CDHR3, PTPRO, S, TXBP6, CTNND2, MARK2, EPN2, ANK3, CDH20, TJP1, PACSIN2, PDLIM5, LRRFIP1, CDH23, PKP1, DOCK9, PTPRB, BZW1, FLNB, ESYT2, SH3GLB1, SNX9, CDH26, VASP, IQGAP1, LASP1, ANLN, ZC3H15, SERBP1, OLFM4, ITGA6, UBAP2, EFHD2, STAT1, ABI1, PARK7, PPME1</p>                                                                                                                                                                                                                                                                                                                                                                                                                                                                                                                                                                                                              |

|            |                           |                          |                                                                                                                                                                                                                                                                                                                                                                                                                                                                                                                                                                                                                                                                                                                                                                                                                                                                                                                                                                                                                                                                                                                                                                                                                                                                                                                                                                                                                                                                                                                                                                                                                                                                                                                                                                                                                                                                                                                                                                                                                                                                                                                                                                                                                                                                                                                                                                                                                                                                                                                                                                                                                                                                                                                                                                                                                                                                                                                                         |
|------------|---------------------------|--------------------------|-----------------------------------------------------------------------------------------------------------------------------------------------------------------------------------------------------------------------------------------------------------------------------------------------------------------------------------------------------------------------------------------------------------------------------------------------------------------------------------------------------------------------------------------------------------------------------------------------------------------------------------------------------------------------------------------------------------------------------------------------------------------------------------------------------------------------------------------------------------------------------------------------------------------------------------------------------------------------------------------------------------------------------------------------------------------------------------------------------------------------------------------------------------------------------------------------------------------------------------------------------------------------------------------------------------------------------------------------------------------------------------------------------------------------------------------------------------------------------------------------------------------------------------------------------------------------------------------------------------------------------------------------------------------------------------------------------------------------------------------------------------------------------------------------------------------------------------------------------------------------------------------------------------------------------------------------------------------------------------------------------------------------------------------------------------------------------------------------------------------------------------------------------------------------------------------------------------------------------------------------------------------------------------------------------------------------------------------------------------------------------------------------------------------------------------------------------------------------------------------------------------------------------------------------------------------------------------------------------------------------------------------------------------------------------------------------------------------------------------------------------------------------------------------------------------------------------------------------------------------------------------------------------------------------------------------|
|            |                           |                          | , PKN2, NCK1, NUMB, KTN1, CDH5, MPP7, ASAP1, CDH9, CDH2, CDH12, CDH17, CDH13, DHX29, GAPVD1, DDX6, NDRG1, FER, PCMT1                                                                                                                                                                                                                                                                                                                                                                                                                                                                                                                                                                                                                                                                                                                                                                                                                                                                                                                                                                                                                                                                                                                                                                                                                                                                                                                                                                                                                                                                                                                                                                                                                                                                                                                                                                                                                                                                                                                                                                                                                                                                                                                                                                                                                                                                                                                                                                                                                                                                                                                                                                                                                                                                                                                                                                                                                    |
| GO:0005096 | GTPase activator activity | 0.0000075237943058726225 | GARNL3, MYO9A, PLCB1, DLC1, ARHGAP26, RIN2, ARHGAP24, RGS3, DOCK2, RABEP1, TBC1D19, RAPGEF2, ADGRB3, RALGAPA1, TBCD, ARHGAP44, RANBP2, RGS20, RAP1GDS1, ARHGAP32, RGS9, RABGAP1L, TBC1D22A, CHN1, ARAP2, ARHGEF12, TBC1D9, RANBP3L, TBC1D5, DOCK4, ASAP2, RGS12, DOCK5, EVI5, RALGAPA2, SGSM1, TBC1D4, RIN3, ARHGAP42, GNAQ, DOCK1, RAP1GAP, SRGAP2, SEC23B, TBC1D13, ALS2, RACGAP1, VAV3, ARHGAP28, ARHGAP31, IQGAP1, SIPA1L2, AGAP9, ARHGAP12, ASAP1, TBC1D1, NRP1, BCR, RGS6, ARFGAP3, SRGAP3, RGPDP4, TIAM2, GAPVD1, RGPDP2, SIPA1L3, ARHGEF11, MYO9B, STARD13, AGAP1, RGS8, RGS7, RAB3GAP2, DNML1                                                                                                                                                                                                                                                                                                                                                                                                                                                                                                                                                                                                                                                                                                                                                                                                                                                                                                                                                                                                                                                                                                                                                                                                                                                                                                                                                                                                                                                                                                                                                                                                                                                                                                                                                                                                                                                                                                                                                                                                                                                                                                                                                                                                                                                                                                                                  |
| GO:0005516 | calmodulin binding        | 0.000021801266278785917  | KCNH5, UNC13C, PLCB1, MYO5A, ARPP21, MYO1E, MYO5C, SPATA17, ATP2B2, PDE1C, INVS, SLC8A3, CACNA1C, PHKB, SYT1, SLC8A1, PDE1A, ITPKB, CALD1, RYR3, EWSR1, RASGRF2, DAPK1, SLC24A4, RYR2, KCNH1, MYO10, CAMK4, ASPM, NOS2, MYLK2, MBP, TJP1, STRN, UNC13B, PCP4, MAP2, MYO3A, MKNK1, KCNQ3, KCNN3, MYO1D, PCNT, MAP6, IQGAP1, TRPV5, ATP2B1, GAP43, MYH13, SNTB1, MYO5B, CAMK1G, MYH15, NOS1, MYO9B, KCNQ5, CAMK1D, SNTB2                                                                                                                                                                                                                                                                                                                                                                                                                                                                                                                                                                                                                                                                                                                                                                                                                                                                                                                                                                                                                                                                                                                                                                                                                                                                                                                                                                                                                                                                                                                                                                                                                                                                                                                                                                                                                                                                                                                                                                                                                                                                                                                                                                                                                                                                                                                                                                                                                                                                                                                  |
| GO:0036094 | small molecule binding    | 0.000022521692758219804  | MTOR, ABCA13, MYO9A, ULK2, NLK, LONP2, KSR1, MX2, ARL15, MICAL3, NUBPL, ITPR2, PDE4D, RALA, NME7, MYO5A, ALDH1A2, GPHN, PIK3C3, NAV2, MYO1E, ALK, ERCC6L2, HLCS, EGLN3, MAP3K9, MYO3B, MOCOS, MYO5C, TNIK, NEK4, EGFR, CDK12, PRKACB, NEK7, ATP2B2, NTRK3, FLT1, GK, THRAP3, DGKI, PRKD1, PAK1, GMDS, EPHA7, ADSS2, GRAMD1B, RAPGEF2, RUNX2, CPS1, TAOK3, AGK, RANBP17, UBE2L3, SYN2, TYW1, LRGUK, GRM7, SEPTIN9, DNAH6, KIF4A, DHX32, UBE2G1, ABCB5, ADK, RPS6KA2, KYNU, KDM1B, DCLK1, PARP15, AURKA, ABCG8, MAP4K4, ABCD2, BMPR1B, RAB8B, PAK3, TTLL7, ITPKB, TRPC5, PDE10A, UBE2E2, HHAT, RNLS, DNM3, CUBN, SCP2, SYN3, PRKCZ, MSH6, RAB27B, ABCA5, PDXDC1, RIPK4, MAPK1, KCNJ1, ABCD3, DNAH14, TRPC7, UBE2O, PI4K2B, RNGTT, CHD6, STK38, MYLK3, ACSBG1, DCAF1, TLK1, PPIP5K1, PAK5, DAPK1, NAV3, AC SM2B, STK32B, MAGI1, ALPK2, DNAH11, RAB22A, MELK, CLPX, SMARCA4, EFTUD2, UBE2R2, BLK, OLA1, ATRX, NUA1, ABL1, AGPS, SL C1A1, PRKAA1, TTLL5, APLF, MAST4, DNAH5, GUCY1A2, SLFN11, R APLA, ACSS3, MYO10, CAMK4, MANBA, PEAK1, LATS2, ATP11C, DHX40, ABCB7, MUSK, ACTR3C, SMARCA1, ABCC12, PRKCE, WNK2, DGKB, ALPK3, ABCC9, P2RX6, TRIO, NLRP13, RPS6KA3, ATP8A2, SCG5, RFC1, SLC2A3, ATP8A1, STK38L, ABCC4, KIAA0232, FANCM, FAR S2, GTF2F2, MARK2, MSH2, MPPED2, GNAL, EPHA6, ATL1, HIPK3, A BCA10, GRK3, NOS2, AFG3L2, STK10, MYLK2, GBP6, STK32A, AK8, GSR, TARS3, MTHFD1L, AQR, BLM, NRK, MAGI3, ADCY10, MYLK4, A T P9A, CDC42BPB, VRK1, GNAI1, BMP2K, PDE6C, GNAQ, DSTYK, PFKF B4, NIN, DNAH8, TRIT1, GADL1, SMARCA2, CGAS, IDE, KIF21A, KIF15, RERGL, BTAF1, PEX6, NEK10, MX1, CFTR, ME2, ATP10B, UBR1, MAP4K3, MYO3A, UBE2E1, CDC42BPA, MAPK10, TXNRD2, TRPM6, P RKCH, HUNK, NLRC5, DHRS11, MKNK1, DMC1, MOK, RALB, MYO1D, R OCK1, LYN, KIF11, ZBTB33, CHKA, RRAGD, CRACR2A, INSR, NEK6, D PYD, OSBPL10, RPH3A, ABCA4, ERN2, SAMHD1, ENPP1, ENTPD5, M OCS2, UCK2, CSNK2A1, HCN1, PRKG1, GRIN2B, INO80, ETNPPL, DHR S3, KIF21B, ABCG1, HADHA, ROR2, KL, ACTR2, RIOK1, PRKAA2, D I RAS2, ERO1B, RAB12, KIFC1, MORC2, THNSL2, HIPK1, DGKK, FICF6, CENPE, TUBB6, AKT3, JAK2, ZBTB38, ARL11, PRKCB, GOT2, KIF6, ABCC8, RFC2, ZBTB21, NRBP1, ATP2B1, IARS2, ASS1, SAR1A, A D CY9, MAST2, ERLIN2, SDS, MAP2K6, DGKG, MYO18B, CBLIF, PARK7, MAPK8, UBE2J2, RAPGEF4, HFM1, MYH13, ATP13A3, DHTKD1, UBE 2QL1, ACACA, ARL4C, RXRA, MAP3K5, MAP3K4, PKN2, PDE2A, RAB3 8, PASK, FGR, TRIM23, ATP6V1B2, TOP1, TINAG, EPHA4, PPIP5K2, NTRK2, ACSM2A, COLEC12, TRPM7, PTK2, MARK4, DNAH10, RUNX1, SLC27A6, HKDC1, ACOXL, MDN1, FYN, BUB1, NLRP14, ARL13B, S C N8A, ALB, ATP9B, UGP2, MAPK9, ROR1, TET1, EPHB1, DDX10, ADCK 1, RPS6KA5, PRKCA, GBP4, NLRP4, FHIT, PCCA, POR, ABCA6, EFL1, BCR, RERG, NLRP8, KIF16B, SNRK, STK36, MB, CYP4B1, RRAS2, G NA14, RABL2A, EPHB2, CSNK1G1, DPH6, MYO5B, CDK14, MET, CAMK 1G, AIFM3, KALRN, ME3, GNAS, MFHAS1, DHX29, ASTN2, DNAH3, AK 3, DDX6, UPRT, DNAH17, ABL2, TTLL11, CMPK1, PLCL1, ERBB4, PR |

|                |                                                                                     |                                    |                                                                                                                                                                                                                                                                                                                                                                                                                                                                                                                                                                                                                                                                                                                                                                                                                                                                                                                                                                                                                                                                                                                                                                                                                                                                                                                                                                                                                                                                                                                                                                                                                      |
|----------------|-------------------------------------------------------------------------------------|------------------------------------|----------------------------------------------------------------------------------------------------------------------------------------------------------------------------------------------------------------------------------------------------------------------------------------------------------------------------------------------------------------------------------------------------------------------------------------------------------------------------------------------------------------------------------------------------------------------------------------------------------------------------------------------------------------------------------------------------------------------------------------------------------------------------------------------------------------------------------------------------------------------------------------------------------------------------------------------------------------------------------------------------------------------------------------------------------------------------------------------------------------------------------------------------------------------------------------------------------------------------------------------------------------------------------------------------------------------------------------------------------------------------------------------------------------------------------------------------------------------------------------------------------------------------------------------------------------------------------------------------------------------|
|                |                                                                                     |                                    | KCQ, MYH15, AK9, NOS1, GLDC, CHD9, MTREX, RAB27A, KIF13A, DN<br>AH9, MYO9B, ORC4, LARS2, RAD51B, CAMK1D, AK2, FER, OSBPL5, C<br>HFR, OSBPL6, OARD1, AGAP1, ROCK2, NARS2, RAB31, PDK1, KIF7,<br>CLCN5, PNPLA3, HSPA12A, STK3, PNPLA8, HNRNPU, IGF1R, KCNAB<br>1, PRKAG2, ATP10A, SEPTIN6, DNML                                                                                                                                                                                                                                                                                                                                                                                                                                                                                                                                                                                                                                                                                                                                                                                                                                                                                                                                                                                                                                                                                                                                                                                                                                                                                                                        |
| GO:00<br>16772 | transferase<br>activity,<br>transferring<br>phosphorus<br>-<br>containing<br>groups | 0.00004<br>8033788<br>3263100<br>1 | MTOR, ULK2, NLK, KSR1, NME7, GPHN, PIK3C3, ALK, MAP3K9, MYO3<br>B, TNIK, NEK4, EGFR, CDK12, PRKACB, NEK7, GNPTAB, SGMS1, NTR<br>K3, FLT1, GK, DGKI, PRKD1, PAK1, EPHA7, TAOK3, AGK, LRGUK, AD<br>K, RPS6KA2, DCLK1, AURKA, MAP4K4, BMPR1B, PAK3, ITPKB, PRKC<br>Z, RIPK4, MAPK1, PI4K2B, RRGTT, STK38, MYLK3, EFEMP1, DCAF1<br>, TLK1, PPIP5K1, PAK5, DAPK1, STK32B, ALPK2, MELK, MAPKAP1,<br>BLK, NUA1, ABL1, PRKAA1, MAST4, CAMK4, PEAK1, LATS2, MUSK,<br>PRKCE, WNK2, DGKB, ALPK3, TRIO, RPS6KA3, LTBP1, STK38L, MAR<br>K2, EPHA6, SH3KBP1, HIPK3, CDKN2C, GRK3, STK10, MYLK2, CCND<br>3, STK32A, AK8, CRIM1, CEPT1, NRK, MAGI3, MYLK4, CDC42BPB, V<br>RK1, BMP2K, POLR3A, CDS2, DSTYK, PFKFB4, CGAS, NEK10, PIGN,<br>MAP4K3, MYO3A, AKAP10, CDC42BPA, MAPK10, TRPM6, PRKCH, HUN<br>K, MKNK1, POLR1D, MOK, ROCK1, LYN, EIF2B3, CHKA, INSR, NEK6,<br>ERN2, UCK2, CSNK2A1, PRKG1, ROR2, RIOK1, SOSTDC1, PRKAA2, H<br>IPK1, DGKK, FICD, AKT3, JAK2, PRKCB, BRD4, NRBP1, MAST2, MAP<br>2K6, DGKG, MAPK8, MAP3K5, MAP3K4, PKN2, PASK, FGR, TOP1, EPH<br>A4, PPIP5K2, NTRK2, TRPM7, PRKAB1, PTK2, MARK4, CNKSR1, HKD<br>C1, FYN, BUB1, UGP2, MAPK9, ROR1, EPHB1, ADCK1, RPS6KA5, NRP<br>1, PRKCA, FHIT, BCR, TUT4, SNRK, PGM2L1, STK36, EPHB2, CSNK1<br>G1, CDK14, MET, DLG2, CAMK1G, MAGI2, KALRN, AK3, ABL2, CMPK1<br>, ERBB4, PRKCQ, AK9, CAMK1D, PIK3R3, AK2, FER, FGGY, ROCK2, P<br>DK1, STK3, IGF1R, PRKAG2, AKAP13                                                                                                                                                                                               |
| GO:00<br>46873 | metal ion<br>transmembrane<br>transporter<br>activity                               | 0.00007<br>8687698<br>9124455<br>4 | CACNA2D3, SLC17A1, SLC24A2, KCNH5, ITPR2, KCNMA1, CHRNA7,<br>CACNG2, SLC4A10, GRIK3, ATP2B2, TUSC3, SLC39A12, SLC8A3, T<br>MEM38B, SLC24A3, TRPM1, SLC39A11, CACNA1C, CACNB2, TMC1, S<br>LC8A1, KCNE4, KCNK10, TRPC5, RYR3, KCNJ1, TRPC7, NIPAL2, LR<br>RC38, GRIK4, KCNS3, SLC24A4, SCN2A, RYR2, SLC9C1, SLC1A1, S<br>LC12A8, KCNH1, ABCC9, OPRM1, CNNM4, KCND2, NIPA2, CACNA1I,<br>KCNJ15, SCN11A, SLC23A2, SLC39A6, KCNH8, SLC9A4, GRIK2, SL<br>C30A10, GRIN2A, TRPM6, SLC12A1, KCNQ3, SLC4A4, SCN10A, KCN<br>D3, KCNN3, SLC13A5, CUL5, ZDHHC17, KCNC1, HCN1, GRIN2B, KCN<br>K5, SLC40A1, SLC5A12, SLC1A7, TRPV5, ABCC8, CACNA1E, ATP2B<br>1, SLC6A1, SHROOM2, SLC6A11, KCNJ18, SLC5A9, SLC10A6, TRPM<br>7, GRIK1, SLC9A5, SLC5A1, SCN8A, NCS1, NALCN, TRPM3, SLC39A<br>8, KCNJ6, CACNG3, SLC1A2, KCNIP4, SLC6A3, ASIC2, KCNQ5, CAC<br>NA2D1, CATSPER2, SLC13A4, KCNAB1                                                                                                                                                                                                                                                                                                                                                                                                                                                                                                                                                                                                                                                                                                                                           |
| GO:00<br>30234 | enzyme<br>regulator<br>activity                                                     | 0.00008<br>5048865<br>6206532<br>2 | BCAR3, SPOCK1, GARNL3, MYO9A, PLCB1, DLC1, ARHGAP26, RIMS1<br>, FGD4, SPRED1, ALK, RIN2, APC, ARHGAP24, DOCK10, EGFR, DENN<br>D1A, USP14, RGS3, DOCK2, C5, PHACTR1, RABEP1, DGKI, CAST, TB<br>C1D19, RALGPS1, RAPGEF2, ADGRB3, TAOK3, UBE2L3, PPP2R2B, H<br>ERC2, GRM7, RPTOR, RALGAP1, RAPGEF5, TBCD, PPP1R12B, PHAC<br>TR2, APP, DOCK8, ARHGAP44, SERPINA6, BMPR1B, RANBP2, RGS20<br>, RAP1GDS1, ARHGAP32, RGS9, MRTFA, MGAT5, RABGAP1L, ITIH5,<br>PPP1R1C, ARHGEF17, NRG3, UBE20, CARD18, TBC1D22A, CHN1, EC<br>T2L, CCNG2, MOB3B, BIRC6, RASGRF2, MRTFB, PPP6R3, RGL1, TIA<br>M1, ARAP2, ARHGEF12, PPP2R5E, RIC8B, TBC1D9, ADGRV1, BCAS3<br>, CLPX, RANBP3L, TBC1D5, DOCK4, PSMF1, RAP1A, NRG1, DENND2B<br>, RASGRF1, PRKCE, ASAP2, DENND4C, RGS12, EGF, TRIO, NSMAD2, S<br>PRED2, RPS6KA3, SCG5, MCF2L, RFC1, ARHGEF7, PPP2R2C, MARK2<br>, HERC1, CDKN2C, KNDC1, MNAT1, CCND3, DOCK5, PLCE1, TGFA, CR<br>IM1, VAV1, IQSEC1, PHACTR3, BMP2, EVI5, RALGAP2, SGSM1, TB<br>C1D4, RIN3, BMP2K, CABIN1, ARHGAP42, GNAQ, SH3BP5, CPAMD8,<br>DOCK1, RAP1GAP, SRGAP2, SEC23B, PSD3, FARP1, MOB1B, UMODL1<br>, MAPK8IP1, TBC1D13, RCAN1, SH3PXD2A, NGEF, ALS2, RACGAP1,<br>DOCK9, VAV3, ITS2, ARHGEF28, DENND2C, ROCK1, ARHGAP28, AR<br>HGAP31, EIF2B3, MMP16, ARFGEF1, RALGPS2, RASGRP1, SERPINB<br>9, PSAP, GPRC5C, PPP2R2A, RASGEF1C, ITPRIP, IQGAP1, FRY, NE<br>T1, SIPA1L2, ALKAL2, MADD, PCNA, ANXA4, AGAP9, PPP1R17, ARF<br>GEF3, MAP2K6, ABI1, PARK7, MAPK8, OAZ2, PPME1, NCAPG2, RAPG<br>EF4, SERPINI2, DBF4B, NCK1, PPP2R3A, DNMBP, TRIM23, CYTH4,<br>DNMT3L, RCAN2, ARHGAP12, SERPINB10, RASGEF1B, ASAP1, CCDC |



|            |         |                       |                                                                                                                                                                                                                                                                                                                                                                                                                                                                                                                                                                                                                                                                                                                                                                                                                                                                                                                                                                                                                                                                                                                                                                                                                                                                                                                                                                                                                                                                                                                                                                                                                                                                                                                                                                                                                                                                                                                                                                                                                                                                                                                                                                                                                                                                                                                                                                                                                                                                                                                                                                                                                                                                                                                                                                                                                                                                                                                                                                                                                                                                                                                                      |
|------------|---------|-----------------------|--------------------------------------------------------------------------------------------------------------------------------------------------------------------------------------------------------------------------------------------------------------------------------------------------------------------------------------------------------------------------------------------------------------------------------------------------------------------------------------------------------------------------------------------------------------------------------------------------------------------------------------------------------------------------------------------------------------------------------------------------------------------------------------------------------------------------------------------------------------------------------------------------------------------------------------------------------------------------------------------------------------------------------------------------------------------------------------------------------------------------------------------------------------------------------------------------------------------------------------------------------------------------------------------------------------------------------------------------------------------------------------------------------------------------------------------------------------------------------------------------------------------------------------------------------------------------------------------------------------------------------------------------------------------------------------------------------------------------------------------------------------------------------------------------------------------------------------------------------------------------------------------------------------------------------------------------------------------------------------------------------------------------------------------------------------------------------------------------------------------------------------------------------------------------------------------------------------------------------------------------------------------------------------------------------------------------------------------------------------------------------------------------------------------------------------------------------------------------------------------------------------------------------------------------------------------------------------------------------------------------------------------------------------------------------------------------------------------------------------------------------------------------------------------------------------------------------------------------------------------------------------------------------------------------------------------------------------------------------------------------------------------------------------------------------------------------------------------------------------------------------------|
|            |         |                       | 88A,FYN,SH2D3C,DOCK3,NCS1,GRM5,TBC1D1,NRP1,BCR,ELMO1,RGS6,ARFGAP3,FBLN1,SRGAP3,MACROH2A1,BCL2L13,RGPD4,SERPINB2,KALRN,GNAS,SERPINB7,TIAM2,TNFAIP8,GAPVD1,WDR41,SLIT2,ERBB4,SERPINB11,RGPD2,SIIPA1L3,EFNA5,ARHGEF11,ESR1,MYO9B,PIK3R3,STARD13,A2M,SPOCK3,AGAP1,RGS8,PSMD2,COL4A3,RGS7,STK3,RAB3GAP2,PRKAG2,AKAP13,DNMLL                                                                                                                                                                                                                                                                                                                                                                                                                                                                                                                                                                                                                                                                                                                                                                                                                                                                                                                                                                                                                                                                                                                                                                                                                                                                                                                                                                                                                                                                                                                                                                                                                                                                                                                                                                                                                                                                                                                                                                                                                                                                                                                                                                                                                                                                                                                                                                                                                                                                                                                                                                                                                                                                                                                                                                                                               |
| GO:0005488 | binding | 0.0001537396643158278 | EBNA1BP2,NOTCH2,BCAR3,MTOR,CNTN4,CACNA2D3,SPOCK1,NSG1,EXOC1L,WWC1,ABCA13,IMMP2L,LRP12,PTPRD,FREM1,TRAPPC9,BNC2,PVT1,NEBL,LRRRC4C,TMTC1,KCNH5,MICU2,ANKS1B,POTEG,SMOC1,MYO9A,ULK2,NLK,LONP2,UNC13C,LRRRC49,SCAPER,FTO,KSR1,MGA,RFX7,AGBL1,ZNF236,PLCB1,ZNF536,TTC3,MX2,TMPRSS2,LIP1,TAF15,SVIL,TLN2,CLTCL1,ZFPM2,ARL15,MICAL3,POTEM,TENM4,NUBPL,L3MBTL4,DLC1,TNRC6B,MGAM,DPP10,ZDHHC21,PTPRA,ITPR2,RIPOR2,PDE4D,RDX,RP1,STXBP1,ERC1,RALA,NME7,SLC44A5,EPS15L1,BCL2,MYO5A,ODAD2,KCNMA1,SYT16,ARPP21,PRDM16,ALDH1A2,ARHGAP26,FBN1,LRFN2,LPCAT2,F13A1,LRRTM4,SETBP1,GPHN,COG5,CDH8,CHRNA7,DCDC1,ROBO2,PUDP,RIMS1,PIK3C3,SPIRE1,TENM3,GABRB3,ZEB1,TMEM132D,AKR1C3,CNTLN,SDCCAG8,RARB,FGD4,EXOC6B,SPRED1,GALNT1,NAV2,ENPEP,SPAG16,MYO1E,TRAPPC8,PLPPR1,USH2A,CEP192,MINAR1,CDC42EP3,LAIR1,TTC33,RIMS2,PCMTD1,ALK,MICOS10,AUTS2,ADGRE1,PCDH7,FOXJ2,CDYL2,CARMIL1,MCTP1,PJA2,COL25A1,BABAM2,SV2C,PAPPA2,GLIS3,FANK1,ERBIN,ERCC6L2,RHPN2,HACD2,ASTN1,UNC79,HLCS,FCHO2,RIN2,PARVB,ANO6,CACNG2,DLGAP1,NEGR1,ZNF880,GLYAT,NAALADL2,MLLT3,EGLN3,GPC6,SUSD4,CNTNAP2,MAP4,MAP3K9,MYO3B,MOCOS,SPON1,CPA6,APC,ZMYM4,ZNF595,HHLA2,TSHZ3,RBFOX3,DSCAM,MYO5C,RTN1,TCF4,CRKL,SOX5,SETD2,ERG,ARHGAP24,ZNF573,TNFR1,URB1,PTPRJ,EFCAB2,OCA2,KDM4C,NEK4,DOCK10,TSHZ2,EGFR,ZNF280B,RFX3,DENND1A,USP14,ANGPT1,CDK12,BACH1,MACF1,CTNNA3,PRKACB,NEK7,RGS3,NCOR1,RNF220,HMCN2,DOCK2,DIAPH3,ZNF407,CCDC138,NEDD4,MYOF,MAML2,MTRF1,SPATA17,SND1,SCAI,GNPTAB,CRB1,NSMCE2,BTBD9,BCL11A,SOX6,FAM83F,TMEM182,PSMB2,SGMS1,CECR2,ARMC2,CHSY1,FLI1,RPRD1A,PTPN4,CDH4,B3GALT5,ATP2B2,NTRK3,LARGE1,RXFP1,C5,PDE1C,FBXL7,ZFAND6,CYP2C9,PHACTR1,DKK2,FLT1,DNAJC13,ZNF648,RFC3,RABEP1,ADAMTS6,ZNF382,GK,TASP1,FNDC3B,CNTN3,THRAP3,MAPKB1,AOAH,EVA1C,GABRB1,DGKI,INVS,C12ORF4,EDAR,GRIA1,CRACD,CAS T,TTC39B,NUP214,NEO1,CNTN6,CABLES1,SLC8A3,UHRF1BP1L,MALRD1,TOM1L2,NELL2,SEZ6L,PRKD1,TBC1D19,PAK1,GMDS,EPHA7,CTNNAL1,NCOA7,KHDRBS2,CHRM3,ADSS2,GRAMD1B,RALGPS1,SPEN,CHSY3,RAPGEF2,PELI2,LRP2,ADGRB3,DEUP1,RUNX2,ARSB,FGF12,CPS1,TAOK3,ONECUT1,LDLRAD3,CPEB4,TMEM38B,AGK,CSTF3,BCKDHB,PRICKLE2,RANBP17,UBE2L3,LDB2,TAF14,SAMD5,PPP2R2B,BTBD11,PUM3,SYN2,CCL28,SMYD3,PATJ,TYW1,HERC2,LRGUK,TMEM241,GRM7,SEPTIN9,RETREG1,RPTOR,DNAH6,GHR,WDSUB1,EPB41L3,KIF4A,THADA,DHX32,COL4A2,AIG1,SSBP3,TMEM74,RALGAP1,CELF2,RAPGEF5,TBCD,NEDD4L,ADAM32,PPP1R12B,TRPM1,ADAM10,HDAC9,ZHX3,ATF7IP,UBE2G1,IL1R1,APBB2,PHACTR2,APP,ABCB5,ADK,RPS6KA2,SAMSN1,KYNU,CACNA1C,KDM1B,CACNB2,KLHL13,MTUS1,PHKB,DCLK1,STAU2,GABRG2,DOCK8,MAPRE2,ZNF600,USP18,SEMA5A,SYT1,VCL,ARHGAP44,NTF3,ACER2,PARP15,NDUFAF2,CD2AP,ZNF723,AURKA,PARN,TTC29,ST18,PYGO1,SLC8A1,HERPUD2,CCDC116,SSBP2,PTPRR,SRGAP2C,ANKRD31,FIG4,DUX4,TAF15,MA RCHF1,CMIP,ABCG8,SERPINA6,PLGRKT,FRMD3,UPP2,CCSER2,LOXHD1,ECPAS,SRGAP2B,KANK1,KCNE4,MAP4K4,HIVEP2,ABCD2,BMPR1B,FMN2,THSD7A,PCSK6,AKAP6,HOMER2,ZNF717,CTNNA2,HADHB,POTEH,ARNT,RAB8B,PDZRN4,PAK3,RFTN1,PDE1A,ZNF257,TTL7,DIP2B,RANBP2,LARP1,ITPKB,TRPC5,RGS20,PD E10A,UBE2E2,RAP1GDS1,HHAT,RNLS,CLIC6,CHST8,KICS2,ERC2,TMEM236,DNM3,NBN,CUBN,SCP2,SYN3,IFT57,PHF21B,INTS7,RBM47,SUSD6,PRKCZ,CALD1,SNTG2,KLHL1,SPOP,BTLA,MAN2A2,GRB10,RALYL,RYR3,TAF15,DIP2A,MSH6,MCPH1,ARHGAP |

|  |  |  |                                                                                                                                                                                                                                                                                                                                                                                                                                                                                                                                                                                                                                                                                                                                                                                                                                                                                                                                                                                                                                                                                                                                                                                                                                                                                                                                                                                                                                                                                                                                                                                                                                                                                                                                                                                                                                                                                                                                                                                                                                                                                                                                                                                                                                                                                                                                                                                                                                                                                                                                                                                                                                                                                                                                                                                                                                                                                                                                                                                                                                                                                                                                                                                                                                                                                                                                                                                                                                                                                                                                                                                                                                                                                                                                                                                                                                                                                                                                                                                                                                    |
|--|--|--|------------------------------------------------------------------------------------------------------------------------------------------------------------------------------------------------------------------------------------------------------------------------------------------------------------------------------------------------------------------------------------------------------------------------------------------------------------------------------------------------------------------------------------------------------------------------------------------------------------------------------------------------------------------------------------------------------------------------------------------------------------------------------------------------------------------------------------------------------------------------------------------------------------------------------------------------------------------------------------------------------------------------------------------------------------------------------------------------------------------------------------------------------------------------------------------------------------------------------------------------------------------------------------------------------------------------------------------------------------------------------------------------------------------------------------------------------------------------------------------------------------------------------------------------------------------------------------------------------------------------------------------------------------------------------------------------------------------------------------------------------------------------------------------------------------------------------------------------------------------------------------------------------------------------------------------------------------------------------------------------------------------------------------------------------------------------------------------------------------------------------------------------------------------------------------------------------------------------------------------------------------------------------------------------------------------------------------------------------------------------------------------------------------------------------------------------------------------------------------------------------------------------------------------------------------------------------------------------------------------------------------------------------------------------------------------------------------------------------------------------------------------------------------------------------------------------------------------------------------------------------------------------------------------------------------------------------------------------------------------------------------------------------------------------------------------------------------------------------------------------------------------------------------------------------------------------------------------------------------------------------------------------------------------------------------------------------------------------------------------------------------------------------------------------------------------------------------------------------------------------------------------------------------------------------------------------------------------------------------------------------------------------------------------------------------------------------------------------------------------------------------------------------------------------------------------------------------------------------------------------------------------------------------------------------------------------------------------------------------------------------------------------------------|
|  |  |  | <p> 32, RAB27B, COL27A1, ZSWIM6, FER1L6, ST8SIA5, CNST, HEATR4, HECW1, DEFA3, LRRC7, MBNL2, ADAMTS17, C7ORF31, ABCA5, PHF19, MRTFA, TAF4B, ANKRD33B, COBL, SENP6, DUSP22, GALNT14, PDXDC1, EBF2, UBN1, SV2B, YAP1, ESS2, SEM1, NFIA, WDR70, PPM1L, RIPK4, ZKSCAN5, SHC4, VPS35L, BRINP1, SCGB2B2, MAPK1, MGAT5, CADPS2, KCNJ1, ABCD3, RABGAP1L, SGTB, DNAH14, TRPC7, ADAM22, USP25, CRISPLD2, KMT2E, ALCAM, PLG, PAPP, PCGF5, PDGFD, C2ORF88, COPB1, SYT10, ZNRF3, DNAJC21, CCDC150, CA5A, XXYL1, MTUS2, PPP1R1C, ABLIM1, CCDC172, ITGBL1, ARHGEF17, NRG3, UBE20, SFMBT2, ANKFY1, NCAM1, GFRA1, SYCP1, NIPBL, RNF17, SLC16A1, SPIDR, GALNT16, PI4K2B, RNGTT, IPO11, EWSR1, GABPA, FAT3, MICU1, ZNF735, CORO2B, CARD18, CHD6, STK38, LCE1F, PTPN13, TBC1D22A, CHN1, SORCS3, MYLK3, ACSBG1, KANSL1, GLP2R, LIMCH1, FMN1, ECT2L, MBNL1, PAFAH1B1, ATF6, EFEMP1, TLL1, ZNF684, DCAF1, ITGB8, STON2, ZFAND3, VPS13D, TLK1, TPM1, NF2, LRRC38, WDR25, CNKSR2, RBFOX1, WDFY4, C1ORF21, HIVEP1, CORIN, CTNNA1, PPP1R9A, ANKRD11, EFCAB8, CDH7, MOB3B, BIRC6, AKAP9, KLF15, RASGRF2, PPARA, PPIP5K1, MEIS2, SNX30, LCLAT1, NFIB, KCNS3, SNX29, ERMP1, MRTFB, PPP6R3, PRGT, RGL1, SYNJ1, NR5A2, ADAMTS3, TIAM1, MPRIP, ARAP2, GRM1, FOXJ3, UBE3D, KAZN, RSRC1, PTPRK, ARHGEF12, GABRG1, ENAH, PAK5, ST6GALNAC3, TRERF1, SF3B6, PARD3B, PCDH11Y, PPP2R5E, PDZRN3, KIAA1958, PLA2R1, GIPC2, EIF3D, TMC04, SEMA3C, DAPK1, NAV3, SLC24A4, SEC14L1, TMEM108, ACSM2B, AGO2, WDH1, STK32B, PHC3, MAGI1, ALPK2, DNAH11, JARID2, SCN2A, RIC8B, TBC1D9, RAB22A, SORCS1, DNAJC15, AMPH, GATAD2B, CPE, PALS2, DYSF, IL34, ANK2, STAG2, BRWD1, TANC1, THUMPD2, ADGRV1, ZNF846, MELK, BCAS3, RYR2, SYNE2, BBS2, PEBP4, WNT9B, ZNF606, MSANTD4, CLPX, RANBP3L, NKG7, SEMA6D, AIF1L, NBEA, SHOC1, DUSP16, ANKS6, SRFBP1, SMARCA4, MRPS35, CDH11, USP8, LDB3, FABP7, NOL4, PARD3, SLC36A1, MAPKAP1, EFTUD2, TNRC6C, PIAS1, TBC1D5, SPG21, UBE2R2, BLK, COL23A1, RBM6, EBF1, TNFR, OLA1, DST, CXADR, DOCK4, MBD5, ATRX, NUA1, PTPRT, XIRP2, ELAVL4, ABL1, KLHL32, AGPS, MXI1, PTPN12, HDAC4, OXR1, SLC1A1, PRKAA1, SDC2, GAS2, SLC12A8, KCNH1, ITGB3BP, MRPS27, LRFN5, RIMBP2, CRTAC1, CRYBG1, DROSHA, TTLL5, APBB1IP, ANO4, L3MBTL3, DMXL2, EIPR1, APLF, NFAT5, ADAMTS14, MAST4, DNAH5, GUCY1A2, NBAS, CDH18, PSMF1, ATE1, SLFN11, RAP1A, GLIS1, TMC05A, ACSS3, MORC1, LYRM4, MYO10, SLC46A3, GPC5, TOX3, ZNHIT6, CAMK4, BAZ2A, MANBA, PLEKHA8, INPP5A, CPSF3, FGF10, FBXL13, C2ORF42, ZC3HAV1, UQCC1, GRID2, CDHR3, TGM1, PEA3, LATS2, NRG1, GSG1L, KLHL33, CLIP1, ASPM, AP3B1, DENND2B, COL6A5, EFCAB6, RASGRF1, PAH, ATP11C, GSE1, ZNF438, DHX40, ABCB7, SYNE1, ZBTB16, MUSK, GALNTL6, KIR3DL2, ZNF675, ACTR3C, GNG7, SMARCD1, SH3GL3, ABCC12, SETDB2, RPF1, PRKCE, FOXK2, SLC03A1, PGAM5, ASAP2, MED15, SLMAP, METAP1D, WNK2, ESRRG, ZNF718, C12ORF40, DGKB, USP33, DENND4C, CEP83, CERS6, FBN2, CD44, RGS12, ZNF831, PTPRO, EGF, ALPK3, PRRC1, ABCC9, P2RX6, TRIO, PDE3A, EXT1, STXBP6, COL5A3, NSMAF, NLRP13, LNPEP, LIMD1, PEX14, SPRED2, ADAMTS2, RPS6KA3, CTNND2, MARCHF8, IFT43, ATP8A2, SCG5, MTMR3, PTPN2, TRIM5, LHFPL3, PLXNA2, POC5, MCF2L, ATXN3, RFC1, HTR2C, RIC3, SLC2A3, ARHGEF7, ALG10B, ATP8A1, ZCHC7, AMBRA1, RFTN2, LTBP1, STK38L, ZFYVE9, GALNT10, GUCD1, KDM7A, OPRM1, ABCC4, PRMT8, HTR2A, KIAA0232, BIN2, PLCXD3, FANCM, FANCA, CYBRD1, CYP4A11, DAZL, INPP4B, MATN2, FARS2, GTF2F2, PPP2R2C, CNM4, KREMEN1, STAC, ANKRD28, SEMA3E, TAF3, RPRD1B, MARK2, GCSAML, GMPR, TMEM67, RCL1, EBF3, ALPL, ZNF33B, LPP, C10ORF90, FHL2, ABHD17C, ADGRA3, CNIH3, PUM1, TMOD2, HERC1, MSH2, IGF2BP3, MPPED2, IGLV2-14, GNAL, CDIN1, EPHA6, ANKRD17, APBA2, MAIP1, LINGO2, ZNF397, SH3KBP1, ATL1, SLC2A13, LUC7L, RELL1, HIPK3, CDKN2C, EPN2, KCND2, TNPO3, SNRPN, ABCA10, GRK3, CPXM2, CD163, SPSB4, CLSPN, NOS2, BICRAL, AFG3L2, CPNE4, STK10, TTC7B, MNAT1, RBBP8, MDFIC, SGCZ, TMTC2, ADAM12, MYLK2, ANK3, SNTG1, EMILIN2, XYLT1, HMGA2, MYOM2, COG2, GBP6, CCND3, BCL11B, VPS41, FOHL1, DOCK5, F5, ECE1, KLHL4, ZIM3, STK32A, IGLV3- </p> |
|--|--|--|------------------------------------------------------------------------------------------------------------------------------------------------------------------------------------------------------------------------------------------------------------------------------------------------------------------------------------------------------------------------------------------------------------------------------------------------------------------------------------------------------------------------------------------------------------------------------------------------------------------------------------------------------------------------------------------------------------------------------------------------------------------------------------------------------------------------------------------------------------------------------------------------------------------------------------------------------------------------------------------------------------------------------------------------------------------------------------------------------------------------------------------------------------------------------------------------------------------------------------------------------------------------------------------------------------------------------------------------------------------------------------------------------------------------------------------------------------------------------------------------------------------------------------------------------------------------------------------------------------------------------------------------------------------------------------------------------------------------------------------------------------------------------------------------------------------------------------------------------------------------------------------------------------------------------------------------------------------------------------------------------------------------------------------------------------------------------------------------------------------------------------------------------------------------------------------------------------------------------------------------------------------------------------------------------------------------------------------------------------------------------------------------------------------------------------------------------------------------------------------------------------------------------------------------------------------------------------------------------------------------------------------------------------------------------------------------------------------------------------------------------------------------------------------------------------------------------------------------------------------------------------------------------------------------------------------------------------------------------------------------------------------------------------------------------------------------------------------------------------------------------------------------------------------------------------------------------------------------------------------------------------------------------------------------------------------------------------------------------------------------------------------------------------------------------------------------------------------------------------------------------------------------------------------------------------------------------------------------------------------------------------------------------------------------------------------------------------------------------------------------------------------------------------------------------------------------------------------------------------------------------------------------------------------------------------------------------------------------------------------------------------------------------------|

|  |  |  |                                                                                                                                                                                                                                                                                                                                                                                                                                                                                                                                                                                                                                                                                                                                                                                                                                                                                                                                                                                                                                                                                                                                                                                                                                                                                                                                                                                                                                                                                                                                                                                                                                                                                                                                                                                                                                                                                                                                                                                                                                                                                                                                                                                                                                                                                                                                                                                                                                                                                                                                                                                                                                                                                                                                                                                                                                                                                                                                                                                                                                                                                                                                                                                                                                                                                                                                                                                                    |
|--|--|--|----------------------------------------------------------------------------------------------------------------------------------------------------------------------------------------------------------------------------------------------------------------------------------------------------------------------------------------------------------------------------------------------------------------------------------------------------------------------------------------------------------------------------------------------------------------------------------------------------------------------------------------------------------------------------------------------------------------------------------------------------------------------------------------------------------------------------------------------------------------------------------------------------------------------------------------------------------------------------------------------------------------------------------------------------------------------------------------------------------------------------------------------------------------------------------------------------------------------------------------------------------------------------------------------------------------------------------------------------------------------------------------------------------------------------------------------------------------------------------------------------------------------------------------------------------------------------------------------------------------------------------------------------------------------------------------------------------------------------------------------------------------------------------------------------------------------------------------------------------------------------------------------------------------------------------------------------------------------------------------------------------------------------------------------------------------------------------------------------------------------------------------------------------------------------------------------------------------------------------------------------------------------------------------------------------------------------------------------------------------------------------------------------------------------------------------------------------------------------------------------------------------------------------------------------------------------------------------------------------------------------------------------------------------------------------------------------------------------------------------------------------------------------------------------------------------------------------------------------------------------------------------------------------------------------------------------------------------------------------------------------------------------------------------------------------------------------------------------------------------------------------------------------------------------------------------------------------------------------------------------------------------------------------------------------------------------------------------------------------------------------------------------------|
|  |  |  | <p>27,CREM,LYPLA1,MBP,AK8,TRPS1,TRAPPC11,TMEM163,HHIPL1,PLCE1,TGFA,IL17RA,ANKFN1,HIP1,CRIM1,XPNPEP1,FUT9,PRR5L,VPS37A,GSR,PCDH9,ATP6V1E1,UTP4,VAV1,CYP4Z1,CDH20,MSRA,RUFY2,MYT1L,FBXO32,ZNF160,TJP1,LDLRAD4,NHP4,EGFLAM,PACSIN2,CNTN1,HLA-B,TARS3,FKBP5,IQSEC1,HSF5,MTHFD1L,SNX3,CACNA1I,NAA35,ZNF367,PDLIM5,KCNJ15,CEPT1,BRCA2,AQR,DISC1,ZBTB2,GALNT13,EXD3,DNER,BLM,ASB7,WDPCP,NRK,SEMA3A,MAGI3,HSF2BP,INTS8,NAP1L4,LIN54,LRP1B,ADCY10,PSG8,STRN,AGL,OR9Q1,ZNF121,ANKRD30BL,STX12,PHACTR3,BMP2,RC3H2,MYLK4,UNC5D,ATP9A,FAM217B,TRAK1,WDR26,PSG9,CDC42BPB,EVI5,DSE,PTCD2,MSR1,VRK1,GNAI1,RALGAPA2,SGSM1,ZC3H14,NCAM2,GFI1B,TBC1D4,RANBP9,RESF1,MYRIP,TTR,HPCAL1,RIN3,MSI2,TPGS2,BMP2K,DNAL1,SLC15A5,RNF38,TTC6,PGPEP1,TMEM161A,SEMA3D,ASXL3,NETO2,PDE6C,ANKRD7,CABIN1,POLR3A,LEMD3,RELN,ARHGAP42,HMGB1,GNAQ,TUBGCP3,NUDCD3,CDS2,AP4E1,FGF9,NFATC2,TDRD7,SH3BP5,CPAMD8,RTTN,MDM1,ZNF106,C19ORF18,MYOM1,ZNF567,CLVS1,TRAF3,ZNF462,PRG4,ANKRD26,ESRP1,UNC13B,TTC21B,ETS2,UBAP2L,GEMIN5,ZNF875,DSTYK,UIMC1,DOCK1,B4GALT6,LRRFIP1,TSPAN2,PFKFB4,RAP1GAP,PLS1,SRGAP2,IKZF2,SNX8,SEC23B,ENOX1,SLC39A6,NIN,HAUS6,DRAKIN,DNAH8,TRIT1,ATF1,GADL1,CCDC186,SLAMF1,SMARCA2,ETS1,FAM83B,ARSJ,GLI3,CGAS,MEGF11,SMARCC1,SNX6,AFF3,GABRR2,SMOC2,PACS1,PCP4,CNKSR3,CASP5,VENTX,IDE,WDR12,MCTP2,KIF21A,KIF15,PRDM10,REGERL,CUL1,MYEF2,ZFYVE26,ZNF431,RERE,PSD3,MAP2,ANKMY1,BTAF1,GAREM1,DAW1,MYL1,FBXO47,PEX6,ZNF618,NEK10,RRBP1,FARP1,MOB1B,ATF2,NDUFAF6,GOLGA8B,HIRA,CYLD,UMODL1,BBS4,ADARB2,LRR8B,MAPK8IP1,MX1,TMEM171,ZMAT4,CLVS2,ANTXR1,PSG6,HIVEP3,COL5A1,GABBR2,PSIP1,ITGA9,KIAA0753,CFTR,MYEOV,KPNA1,CSE1L,NELL1,DOP1B,ME2,TBC1D13,UBASH3A,AHDC1,FAM214A,COL14A1,RGMB,NEU3,PHAF1,CEP44,MRPL13,KITLG,ZZEF1,DNAJC7,ATP10B,CAMTA1,UBR1,DCC,MYT1,RNU2-47P,SMPDL3A,CHRM5,MAP4K3,YLPM1,YPEL1,SLC30A10,RCAN1,GTTF2I,RORB,CHAF1A,TADA2A,DAB1,MED27,ZNF208,SELENON,RB1CC1,NMD3,MYO3A,AKAP10,UBE2E1,PTPRE,REPS1,PRKN,AGMO,MTMR2,ZNF608,SH3PXD2A,ZFAND4,SPSB1,CDC42BPA,TBX20,SP110,CCDC102B,DLGAP2,AFAP1,MAPK10,DACH1,PCDH15,ZNF541,FBXO3,RWDD2B,DPF3,LGI2,LYST,NGEF,HEPHL1,GRIN2A,ARID5B,ZBED9,H2BC15,JPH1,TXNRD2,ATXN1,WSB1,TRPM6,CDH23,LALBA,PRKCH,PKP1,HUNK,TG,IL6R,FRMPD4,PEPD,ALSS2,RACGAP1,NLRC5,ZNF627,OR51E1,ACO1,ANKRD30A,TDFP1,DHRS11,CNOT6L,MKNK1,HEMGN,KANK4,DOCK9,SNX25,DMC1,FBLN5,LCE3B,KCNQ3,TOX,POLR1D,SHISA9,SLC4A4,PTPRB,ZFP90,AOPEP,TRMT61B,PDE6A,COPS8,TSPAN33,TBATA,ZNF124,SCN10A,LRBA,RBMX2,ANKRD55,SHANK2,ST8SIA1,ANKRD18A,MAP7,USP7,VAV3,PSMA1,MON2,LRR37A3,ENPP3,TASOR2,PLAGL1,KCND3,HAAO,FAH,MESD,ITSN2,SOX30,PTGFRN,KIAA0825,MOCK,SYBU,KIR2DL4,ARHGEF28,RALB,NPAS2,ADGRG6,YIPF6,KCNIN3,MYO1D,SEC24D,PPA2,FAR1,CA1,ROCK1,LYN,VCAM1,SEL1L,ARHGAP31,ZNF780B,CTSB,EIF2B3,LRIG1,TTC37,SUMO3,SLC15A2,ZNF169,PLEKHB2,KIF11,DTX1,BZW1,TENM2,OVOL2,PIWIL3,ZBTB33,ADA2,NTN1,CHKA,PLCB4,MMP16,PRUNE2,ZFHX3,FANCL,DPYSL5,SLC13A5,ZNF44,RRAGD,BANP,SUPT16H,ARID1B,HOXC13,CRACR2A,FAM81A,RNF152,BAZ1A,CASZ1,OTUD7A,INSR,CUL5,DMBT1,OR7A17,BMF,YTHDF3,TFF1,DEDD2,NEK6,HECTD1,GRID1,SHROOM3,XRCC4,COLQ,FAM118A,SLC52A1,HDAC11,NMU,LYPLAL1,DDHD1,PBX3,SUMO2,HS1BP3,ZNF292,ADAMTS19,DPYD,ARFGEF1,PDE4DIP,GAST,POGK,SNAI2,ASH1L,UBL3,IGHV3-74,HOXC4,BID,SIAH2,PIGK,OSBPL10,RPH3A,TANC2,ZBTB80S,COX5A,ABCA4,TRABD2B,UFD1,RXRG,SP3,DRAM1,ERN2,FNDC1,ZNF879,MBTPS2,FLNB,TRIM58,TIAL1,TOM1,ELF2,ZNF804B,IFI44,PLPP4,NREP,ZDHHC17,NSD2,FYCO1,CERS3,ESYT2,SH3GLB1,SLC22A14,CD9,CARD10,LTN1,KRT6B,RALGPS2,TWIST2,</p> |
|--|--|--|----------------------------------------------------------------------------------------------------------------------------------------------------------------------------------------------------------------------------------------------------------------------------------------------------------------------------------------------------------------------------------------------------------------------------------------------------------------------------------------------------------------------------------------------------------------------------------------------------------------------------------------------------------------------------------------------------------------------------------------------------------------------------------------------------------------------------------------------------------------------------------------------------------------------------------------------------------------------------------------------------------------------------------------------------------------------------------------------------------------------------------------------------------------------------------------------------------------------------------------------------------------------------------------------------------------------------------------------------------------------------------------------------------------------------------------------------------------------------------------------------------------------------------------------------------------------------------------------------------------------------------------------------------------------------------------------------------------------------------------------------------------------------------------------------------------------------------------------------------------------------------------------------------------------------------------------------------------------------------------------------------------------------------------------------------------------------------------------------------------------------------------------------------------------------------------------------------------------------------------------------------------------------------------------------------------------------------------------------------------------------------------------------------------------------------------------------------------------------------------------------------------------------------------------------------------------------------------------------------------------------------------------------------------------------------------------------------------------------------------------------------------------------------------------------------------------------------------------------------------------------------------------------------------------------------------------------------------------------------------------------------------------------------------------------------------------------------------------------------------------------------------------------------------------------------------------------------------------------------------------------------------------------------------------------------------------------------------------------------------------------------------------------|

|  |  |  |                                                                                                                                                                                                                                                                                                                                                                                                                                                                                                                                                                                                                                                                                                                                                                                                                                                                                                                                                                                                                                                                                                                                                                                                                                                                                                                                                                                                                                                                                                                                                                                                                                                                                                                                                                                                                                                                                                                                                                                                                                                                                                                                                                                                                                                                                                                                                                                                                                                                                                                                                                                                                                                                                                                                                                                                                                                                                                                                                                                                                                                                                                                                                                                                                                                                                                                                                                                 |
|--|--|--|---------------------------------------------------------------------------------------------------------------------------------------------------------------------------------------------------------------------------------------------------------------------------------------------------------------------------------------------------------------------------------------------------------------------------------------------------------------------------------------------------------------------------------------------------------------------------------------------------------------------------------------------------------------------------------------------------------------------------------------------------------------------------------------------------------------------------------------------------------------------------------------------------------------------------------------------------------------------------------------------------------------------------------------------------------------------------------------------------------------------------------------------------------------------------------------------------------------------------------------------------------------------------------------------------------------------------------------------------------------------------------------------------------------------------------------------------------------------------------------------------------------------------------------------------------------------------------------------------------------------------------------------------------------------------------------------------------------------------------------------------------------------------------------------------------------------------------------------------------------------------------------------------------------------------------------------------------------------------------------------------------------------------------------------------------------------------------------------------------------------------------------------------------------------------------------------------------------------------------------------------------------------------------------------------------------------------------------------------------------------------------------------------------------------------------------------------------------------------------------------------------------------------------------------------------------------------------------------------------------------------------------------------------------------------------------------------------------------------------------------------------------------------------------------------------------------------------------------------------------------------------------------------------------------------------------------------------------------------------------------------------------------------------------------------------------------------------------------------------------------------------------------------------------------------------------------------------------------------------------------------------------------------------------------------------------------------------------------------------------------------------|
|  |  |  | <p>CTIF,SAMHD1,HSD17B14,IFT81,ENPP1,ENTPD5,UTRN,MOCS2,RASGRP1,IGSF11,SNX9,PAMR1,CDH26,DZANK1,PXDNL,UCK2,NDRG2,CSNK2A1,BMP5,PWWP3A,WDR72,KCNC1,CSF1,GHRH,PPIL6,POTEB3,EOGT,CCDC34,HDGFL3,ZNF385D,NUP37,BCL2L1,SERPINB9,SCAF4,KRT25,CTDP1,HCN1,PRKG1,LAMA3,ASB4,GRIN2B,ST13,ANKRD66,GRB14,TMEM71,INO80,FANCB,IGHV2-70D,CLNS1A,CNMD,ETNPPL,DHRS3,KIF21B,SMAD5,CELF4,SYNJ2,TCERG1,HEATR6,ABCG1,MARCHF11,FOXN3,KCNK5,DCUN1D4,PLXDC2,VSTM4,SLC40A1,PRAME,HADHA,MYCL,TNN,FAM149B1,CABYR,CIDEC,KLHL7,PSAP,PSMA5,CFHR4,MICALL2,MED1,IPCEF1,POTEB2,NSUN6,ATG4B,CDC14B,PCNT,KDM6A,ATRN,IL33,AJAP1,GPRC5C,TLNRD1,ROR2,CFH,PPP2R2A,ZNF521,NPL,KL,BANK1,CSDE1,FAT1,HGD,OTOG,LMX1A,IL10,ACTR2,SFPQ,SCML2,CALN1,RIOK1,CLSTN2,TTC39C,PTH,SDF4,SOSTDC1,TOP3B,PRKAA2,CSF2RB,DIRAS2,SKA1,NDC80,GOLGA8G,RNF182,SOHLH1,LARP6,PACRG,ERO1B,PHF20L1,ABHD2,ITPRIP,VSTM2A,FAM204A,MAP6,VASP,PLA2G4A,ETV6,TACC2,SCFD2,SHISAL1,PALMD,RAB12,SNRPC,KIFC1,IQGA1,RPS12,REG4,PRB3,CAMLG,ZBTB7C,TEAD1,MORC2,SREBF2,ANP32B,YBX3,AIMP1,LASP1,THNSL2,FYB2,NRXN1,EPHX4,PCID2,HIPK1,ZNF234,ENTHD1,CISD1,CIB4,ZNF518A,DGKK,SNAP91,CD70,CYP4F22,CIBAR1,PBLD,FICD,ERICH5,CACYBP,CADM1,CENPE,PEG10,LMX1B,NET1,SIPA1L2,TUBB6,NGDN,ELOC,ANLN,TWIST1,RNU6-1150P,AKT3,ALKAL2,RNU1-51P,JAK2,ADAM28,VSX1,RPF2,FSTL1,CHCHD6,ZBTB38,MPPE1,ISX,BPNT1,SEC14L3,SVEP1,MADD,HCRTR1,RBM19,PTGS1,PATL1,ZNF287,CELSR2,ZNF449,PRSS2,FH,TDP1,CREBBP,MELTF,MRM1,TNKS,ARL11,SGO1,GORAB,PCNA,SIAH3,TRPV5,UFL1,DAMTS5,NFKBIA,PRKCB,ANKRD24,FBXW2,CFAP299,GOT2,NTM,KIF6,ABCC8,MIPEP,PCDH11X,ANXA4,OVCH1,MT1HL1,CACNA1E,ZC3H15,ANP32A,OTULINL,RFC2,SMTN,ZNF354C,ST6GAL2,ALX4,RNU6-113P,RTRAF,USH1C,BRD4,ZBTB21,SERBP1,SMPD4,NEDD9,OLFM4,NRBP1,ITGA6,ATP2B1,GAP43,SLC14A2,IARS2,CLCA4,DGLUCY,ATP1A1-AS1,ASS1,CNDP2,MTCL1,GRIP1,IGHV10R15-9,CTNBL1,GTSE1L,AGAP9,ADGRE3,SAR1A,ADCY9,EML1,CNIH1,MAST2,HPSE2,BTG3,ZNF528,ERLIN2,GOLGA8J,ZNF611,TRAPPC3,MAPK1IP1L,UBAP2,ADAMTSL3,EFHD2,CIDEA,PCMTD2,ZBTB49,BBS9,EXT2,EXOC1,KRT6A,STOX2,AGO1,FRA10AC1,PDP2,DIPK1A,MEOX2,SLC6A1,GID8,ELL2,GRXCR1,SDS,LINGO1,SNAPC3,STAT1,ZCCHC14,BRMS1L,FAM189A2,NDFIP2,NR2C1,MAP2K6,S100PBP,CMTM7,DGKG,VAT1L,ERICH3,SHROOM2,SLC6A11,KCNJ18,MARCHF6,GATAD1,MTPN,ABI1,MYO18B,NECTIN4,ARMC6,CEMIP,POU6F2,IMPACT,CBLIF,CCBE1,SLX4IP,PARK7,ADAMTS18,MAPK8,ITGA4,TOP3A,OAZ2,EIF3F,PPME1,MED12L,ZSCAN30,FBXL17,UBL7,POU1F1,UBE2J2,ADCYAP1R1,PLA2G12B,MTF2,CSMD1,NCAPG2,TM9SF4,RAPGEF4,SCGB1D1,FOXP2,ASB2,MYOCD,HFM1,HMCN1,CEP120,MYH13,ATP13A3,DHTKD1,ZSCAN5C,CYFIP2,UBE2QL1,HNRNPM,ACACA,KRT85,ASCC2,ST8SIA4,ARL4C,EFHB,ARID3B,MEF2C,STOML1,ZNF613,ADGRB1,RXRA,WNTR7A,RBPMS2,ECHDC1,OXNAD1,MAP3K5,NDFIP1,IKBIP,MAP3K4,TRIM43B,WASF3,S100B,SERPINI2,PRDM13,TRIM43,FOXO6,EIRI1,SUMF1,EFCAB14,ZNF112,CD82,ATP6V1C2,C9ORF43,CHAMP1,C16ORF72,BTF3L4,MAGEL2,PKN2,RAD51AP1,SLC10A6,FAM25C,PDE2A,RAB38,LRR2,KRTAP21-2,SFI1,DBF4B,FBXW8,SDCBP,NECTIN1,DSG1,JPT2,SPPL2B,NMCE1,C3ORF52,ZNF813,COMMD8,ERICH1,WWOX,ZBTB25,FAM72A,PASK,MLLT1,MS4A4A,NCK1,FLVCR1,SCAF8,FGR,CWC22,CCDC106,DRC7,CDCA8,PPP2R3A,DNMBP,RNU6-1007P,TRIM23,ATP6V1B2,CXCL2,TOP1,TINAG,FAM72B,SNAP29,FAM72D,MLLT10,C2,IFNAR1,RNF8,GNG12,LCE3D,KLHL29,EPHA4,PIIP5K2,TEX29,CYTH4,EMP1,INTS13,GABRA5,KIAA0319L,MECOM,DNMT3L,NTRK2,ANKRD20A1,IL1RAPL1,MGAM2,FNDC3A,ACSM2A,RSPH1,KHDC4,NUMB,LHX9,ADAMTS9,WNT2B,COLEC12,FRRS1,ZBTB10,TNNI1,PLEKHA3,OCN,CCDC152,POSTN,FAM110A,CREB5,SNRPD1,SHISA6,MEGF10,FBXO31,EXTL3,AKAP1</p> |
|--|--|--|---------------------------------------------------------------------------------------------------------------------------------------------------------------------------------------------------------------------------------------------------------------------------------------------------------------------------------------------------------------------------------------------------------------------------------------------------------------------------------------------------------------------------------------------------------------------------------------------------------------------------------------------------------------------------------------------------------------------------------------------------------------------------------------------------------------------------------------------------------------------------------------------------------------------------------------------------------------------------------------------------------------------------------------------------------------------------------------------------------------------------------------------------------------------------------------------------------------------------------------------------------------------------------------------------------------------------------------------------------------------------------------------------------------------------------------------------------------------------------------------------------------------------------------------------------------------------------------------------------------------------------------------------------------------------------------------------------------------------------------------------------------------------------------------------------------------------------------------------------------------------------------------------------------------------------------------------------------------------------------------------------------------------------------------------------------------------------------------------------------------------------------------------------------------------------------------------------------------------------------------------------------------------------------------------------------------------------------------------------------------------------------------------------------------------------------------------------------------------------------------------------------------------------------------------------------------------------------------------------------------------------------------------------------------------------------------------------------------------------------------------------------------------------------------------------------------------------------------------------------------------------------------------------------------------------------------------------------------------------------------------------------------------------------------------------------------------------------------------------------------------------------------------------------------------------------------------------------------------------------------------------------------------------------------------------------------------------------------------------------------------------|

|  |  |                                                                                                                                                                                                                                                                                                                                                                                                                                                                                                                                                                                                                                                                                                                                                                                                                                                                                                                                                                                                                                                                                                                                                                                                                                                                                                                                                                                                                                                                                                                                                                                                                                                                                                                                                                                                                                                                                                                                                                                                                                                                                                                                                                                                                                                                                                                                                                                                                                                                                                                                                                                                                                                                                                                                                                                                                                                                                                                                                                                                                                                                                                                                                                                                                                                                                                                                                                                                                                                                                                                                                                                                                                                                                    |
|--|--|------------------------------------------------------------------------------------------------------------------------------------------------------------------------------------------------------------------------------------------------------------------------------------------------------------------------------------------------------------------------------------------------------------------------------------------------------------------------------------------------------------------------------------------------------------------------------------------------------------------------------------------------------------------------------------------------------------------------------------------------------------------------------------------------------------------------------------------------------------------------------------------------------------------------------------------------------------------------------------------------------------------------------------------------------------------------------------------------------------------------------------------------------------------------------------------------------------------------------------------------------------------------------------------------------------------------------------------------------------------------------------------------------------------------------------------------------------------------------------------------------------------------------------------------------------------------------------------------------------------------------------------------------------------------------------------------------------------------------------------------------------------------------------------------------------------------------------------------------------------------------------------------------------------------------------------------------------------------------------------------------------------------------------------------------------------------------------------------------------------------------------------------------------------------------------------------------------------------------------------------------------------------------------------------------------------------------------------------------------------------------------------------------------------------------------------------------------------------------------------------------------------------------------------------------------------------------------------------------------------------------------------------------------------------------------------------------------------------------------------------------------------------------------------------------------------------------------------------------------------------------------------------------------------------------------------------------------------------------------------------------------------------------------------------------------------------------------------------------------------------------------------------------------------------------------------------------------------------------------------------------------------------------------------------------------------------------------------------------------------------------------------------------------------------------------------------------------------------------------------------------------------------------------------------------------------------------------------------------------------------------------------------------------------------------------|
|  |  | <p>1,TRPM7,KTN1,KRTAP26-<br/>1,PRKAB1,DTHD1,IREB2,MVB12B,HS6ST1,PTK2,ERP27,MARK4<br/>,CDH5,TPH2,RCAN2,ANKRD6,APOL2,SCGN,NFKBID,ARHGAP12,<br/>CLDN18,ASCL3,MPP7,DIAPH1,FBXO41,FEZ2,INIP,LAMB1,SCA<br/>MP1,APIP,CYFIP1,SUSD1,UBE3A,TMEM54,SCG3,APOL1,PCDH8<br/>,SEMA4D,JAM2,DNAH10,PITPNC1,FRMD6,MC2R,ZBTB20,FAT4,<br/>IMPA2,FAM102A,LRMDA,ZNF66,AP2B1,RUNX1,AKR1B1,C9,KIR<br/>REL1,WNT5B,RASGEF1B,AMFR,SAXO1,SCARA5,CTSE,NENF,SH2<br/>D1B,POMT2,HEATR5A,ZNF845,PSTPIP2,ZFYVE1,SANBR,ASAP1<br/>,SAMD13,ICA1,PLCZ1,EDIL3,NOS1AP,MTTP,DIDO1,TPTE,SOR<br/>BS2,PDCL3,SRP9,CNKSR1,CCDC88A,NSUN2,SLC27A6,UBAP1L,<br/>CHCHD2,GALNT18,HKDC1,ADAMTS16,SPAG6,ACOXL,SLC5A1,MD<br/>N1,CDC45,BICD1,TNFSF11,FYN,BUB1,KDM5A,PCBP3,MYL12B,<br/>NLRP14,ZNF705G,PPM1F,GOLGA8F,ADGRL2,UNC45B,ARL13B,X<br/>PO7,SDE2,RBMS3,UHRF2,SCN8A,HDAC2,SNTB1,AVEN,SLF1,SA<br/>CM1L,TBX15,SH2D3C,PSME3IP1,DOCK3,TRNAU1AP,NCS1,COL1<br/>8A1,GALNT17,CDH9,LHFPL2,LYSMD2,ATP5PF,ALB,DOK5,ATP9<br/>B,NALCN,UGP2,MTMR7,EHBP1,ZFYVE28,MAPK9,RSPH14,PABPC<br/>1,CRTAM,APELA,MDGA2,STT3A,DEFB108B,ROR1,SLC16A9,GAL<br/>NT2,FUT8,TET1,ARNT2,ASB3,HECW2,POTEJ,CDH2,CNTN5,ITG<br/>A8,SEL1L2,FBXL20,NTN4,RAD9A,XRN2,PHLPP1,PLEKHA2,GPR<br/>137B,RNU6-</p> <p>929P,EPHB1,EYS,GRM5,DDX10,ADCK1,RAI14,SPOPL,ZNF705D<br/>,RPS6KA5,SPTB,TBC1D1,LRRRC69,PTPRG,ANKRD36C,PID1,NRP<br/>1,MIDEAS,FCHSD2,SDK1,PRKCA,GBP4,IFT46,MRPL58,NLRP4,<br/>ANKRD36B,ATPSCKMT,SPHKAP,FAIM,RNF215,SAMD12,USP24,F<br/>AAP24,MOGAT3,FHIT,ITGA1,ZNF615,PCCA,CROT,KLF12,RNF1<br/>38,RC3H1,NRIP1,CHODL,POR,ZNF850,ZNF235,ABCA6,SLC14A<br/>1,CLEC20A,EFL1,MCC,GOLGA8S,ZNF738,SUPT3H,BCR,TUT4,N<br/>RXN3,ELMO1,RGS6,RERG,ZNF215,NLRP8,TCERG1L,KIF16B,CD<br/>H12,PRIM2,SNRK,ARMC3,MIPOL1,C14ORF39,ARFGAP3,SENP8,<br/>USP49,ELP2,CFAP70,PGM2L1,FBLN1,STK36,NSG2,PAQR5,MB,<br/>RAG1,KCNJ6,B9D1,ZMYM1,DGCR2,DNPEP,CYP4B1,RRAS2,GNA1<br/>4,ZNF678,BMPER,RABL2A,KIAA1328,PRDM15,CUX1,SRGAP3,S<br/>LC35F1,ZNF420,MACROH2A1,MITF,NBPF1,EPHB2,TOGARAM1,C<br/>SNK1G1,SACS,BCL2L13,RNF11,SGCG,CD38,EYA4,CHCHD3,DPH<br/>6,MYO5B,RGPD4,PPIL2,CDK14,RSRP1,AKAIN1,MET,MUC16,SP<br/>PL3,DLG2,CDH17,COMMD10,ZNF705B,ATP6V0D2,SPECC1,CAMK<br/>1G,IBA57,METTL15,PPFIA2,CDH13,STXBP4,POTED,MAB21L3,<br/>KRTAP19-</p> <p>7,CACNG3,ATG5,USP32,NRAP,MAGI2,KIAA1217,PRDM11,VMP1<br/>,UNK,AIFM3,FAM171A1,MLIP,FLRT2,MYB,KALRN,ME3,ZNF704<br/>,SLC1A2,GNAS,LAMA1,MFHAS1,CA10,CPQ,NUP43,TRIM9,ATRN<br/>L1,TIAM2,DHX29,BMP7,TTC28,CHIT1,TMPRSS15,ASTN2,DLG5<br/>,TNFAIP8,ZMYND8,GAPVD1,RNF217,KIRREL3,PRSS23,KCTD1,<br/>GOLGA6A,DNAH3,ZNF74,BPTF,BTBD10,CCSER1,AK3,ZMYND11,<br/>TMEM25,NUDT21,TRAPPC10,GRM3,KMT2C,DDX6,ADGRF5,UPRT,<br/>PDGFC,WDR41,DNAH17,PLIN2,PPP1R13B,ELOVL7,FOCAD,EPB4<br/>1L4A,ABL2,MMP26,MRPL37,TRAPPC6B,BACE2,RFX2,PARPBP,N<br/>ECAB1,PKNOX2,EYA1,FHOD3,PDZD2,TTLL11,GOLGA8T,PRPF18<br/>,SLIT2,CMPK1,TMPRSS3,EXOC4,RNU6-</p> <p>835P,CNOT7,FAM126A,KCNIP4,ESCO1,KCTD8,CCDC141,PLCL1<br/>,ERBB4,ANKRD30B,IL20RB,FAM3B,FAM126B,GSAP,TRHDE,SYN<br/>DIG1,ROBO1,SAMD4A,PBX1,SPATS2L,IRAG1,NPAS3,NUF2,PRK<br/>CQ,RGPD2,IPP,SAMM50,ANTXR1,NDRG1,MYH15,SORCS2,SIPA1<br/>L3,TRDN,MGMT,ZNF679,NLGN1,SYNPR,CTTNBP2,AK9,SHLD2,N<br/>OS1,SLC6A3,GLDC,CHD9,PRR16,ASIC2,TXNDC16,EFNAS,TCF1<br/>2,LRRRC9,GAS2L1,ARHGEF11,MTREX,VCAN,RAB27A,NSD1,EHMT<br/>1,SLIT3,DTNA,KIF13A,AP5M1,FRMD5,ESR1,DNAH9,SLC25A48<br/>,MYO9B,NTNG1,KDM4B,CYP2C8,KCNQ5,LOXL2,CACNA2D1,NYAP<br/>2,IGLC3,ANKRD36,C16ORF74,CEP57L1,IQCJ-</p> <p>SCHIP1,MPDZ,FAM153A,IRAG2,ADGRG7,ORC4,SKAP2,PRLR,AG<br/>O3,HTT,LARS2,FOXB1,RAD51B,CAMK1D,PIK3R3,SLC25A18,CF<br/>AP44,POTEC,CDKAL1,EML6,OPCML,AK2,HLA-</p> <p>F,FER,ZNF302,EVA1A,EYA2,CCR2,RPGRIP1,STARD13,PITPNM<br/>3,SNTB2,WDR64,OSBPL5,INTS12,IGLV3-</p> |
|--|--|------------------------------------------------------------------------------------------------------------------------------------------------------------------------------------------------------------------------------------------------------------------------------------------------------------------------------------------------------------------------------------------------------------------------------------------------------------------------------------------------------------------------------------------------------------------------------------------------------------------------------------------------------------------------------------------------------------------------------------------------------------------------------------------------------------------------------------------------------------------------------------------------------------------------------------------------------------------------------------------------------------------------------------------------------------------------------------------------------------------------------------------------------------------------------------------------------------------------------------------------------------------------------------------------------------------------------------------------------------------------------------------------------------------------------------------------------------------------------------------------------------------------------------------------------------------------------------------------------------------------------------------------------------------------------------------------------------------------------------------------------------------------------------------------------------------------------------------------------------------------------------------------------------------------------------------------------------------------------------------------------------------------------------------------------------------------------------------------------------------------------------------------------------------------------------------------------------------------------------------------------------------------------------------------------------------------------------------------------------------------------------------------------------------------------------------------------------------------------------------------------------------------------------------------------------------------------------------------------------------------------------------------------------------------------------------------------------------------------------------------------------------------------------------------------------------------------------------------------------------------------------------------------------------------------------------------------------------------------------------------------------------------------------------------------------------------------------------------------------------------------------------------------------------------------------------------------------------------------------------------------------------------------------------------------------------------------------------------------------------------------------------------------------------------------------------------------------------------------------------------------------------------------------------------------------------------------------------------------------------------------------------------------------------------------------|

|            |                      |                        |                                                                                                                                                                                                                                                                                                                                                                                                                                                                                                                                                                                                                                                                                                                                                                                                                                                                                                                                                                                                                                                                                                                                                                                                                                                                                                                                                                                                                                                                                                                                                                                                                                                                                                                              |
|------------|----------------------|------------------------|------------------------------------------------------------------------------------------------------------------------------------------------------------------------------------------------------------------------------------------------------------------------------------------------------------------------------------------------------------------------------------------------------------------------------------------------------------------------------------------------------------------------------------------------------------------------------------------------------------------------------------------------------------------------------------------------------------------------------------------------------------------------------------------------------------------------------------------------------------------------------------------------------------------------------------------------------------------------------------------------------------------------------------------------------------------------------------------------------------------------------------------------------------------------------------------------------------------------------------------------------------------------------------------------------------------------------------------------------------------------------------------------------------------------------------------------------------------------------------------------------------------------------------------------------------------------------------------------------------------------------------------------------------------------------------------------------------------------------|
|            |                      |                        | 1, A2M, WDFY3, CHFR, ZNF721, PCMT1, EPS8, OSBPL6, AUH, JAZF1, ZNF578, OARD1, ZNF891, SPOCK3, SEMA4B, NRF1, IGHV10R21-1, ZNF14, ANO2, PHC2, GRIA4, AGAP1, ROCK2, PRDM1, RORA, STMP1, IL16, TERB2, NARS2, DMRT1, EIF4G3, CDCA5, PPP1CB, CATSPE R2, RGS8, RAB31, PDK1, HSPG2, PSMD2, PTPRQ, HERPUD1, NCOA6, TRIM2, COL4A3, WASHC1, ZFP30, RGS7, HOOK3, KIF7, GNG2, PCSK2, FSTL4, CLDN10, BARD1, PALD1, CLCN5, PNPLA3, HSPA12A, STK3, DEPTOR, ZNF423, SLC13A4, C1QL3, RSU1, PNPLA8, ZNF568, HNRNP, LINC00240, VTI1A, CEP72, RAB3GAP2, TULP4, CADPS, APCDD1, IGF1R, KCNAB1, PRKAG2, GLI2, ANKRD10, MFSD11, APMAP, IQCM, THRB, LSAMP, AKAP13, MORC3, ATP10A, SEPTIN6, DNMI1                                                                                                                                                                                                                                                                                                                                                                                                                                                                                                                                                                                                                                                                                                                                                                                                                                                                                                                                                                                                                                                        |
| GO:0031267 | small GTPase binding | 0.00022933543613750437 | MICAL3, ERC1, MYO5A, RIMS1, FGD4, RIMS2, RIN2, DENND1A, DOCK2, DIAPH3, DGKI, PAK1, RANBP17, ARHGAP44, PAK3, RANBP2, RABGAP1L, ANKFY1, IPO11, MAPKAP1, DOCK4, DMXL2, RAP1A, USP33, TNPO3, DOCK5, PLCE1, CDC42BPB, EVI5, SGSM1, RANBP9, MYRIP, RIN3, UNC13B, DOCK1, RAP1GAP, SRGAP2, CCDC186, FARP1, CSE1L, TBC1D13, PRKCH, ALS2, ROCK1, RNF152, RPH3A, MICALL2, IQGAP1, YBX3, ADCYAP1R1, RAPGEF4, CYFIP2, PKN2, DIAPH1, CYFIP1, BICD1, XPO7, DOCK3, MYO5B, GAPVD1, EXOC4, NDRG1, MYO9B, FER, EPS8, ROCK2, RAB3GAP2, AKAP13, DNMI1                                                                                                                                                                                                                                                                                                                                                                                                                                                                                                                                                                                                                                                                                                                                                                                                                                                                                                                                                                                                                                                                                                                                                                                             |
| GO:0005509 | calcium ion binding  | 0.0002599763236418613  | NOTCH2, SPOCK1, MICU2, SMOC1, UNC13C, PLCB1, ITPR2, EPS15L1, FBN1, LPCAT2, CDH8, ADGRE1, PCDH7, MCTP1, EFCAB2, MACF1, HMCN2, GNPTAB, CRB1, CDH4, ATP2B2, AOA, NELL2, RAPGEF2, LRP2, CPS1, GRM7, SYT1, SLC8A1, CUBN, RYR3, SYT10, FAT3, MICU1, EFEMP1, TLL1, EFCAB8, CDH7, PCDH11Y, TBC1D9, DYSF, ADGRV1, MELK, RYR2, AIF1L, CDH11, DST, CRTAC1, CDH18, CDHR3, EFCAB6, DGKB, FBN2, EGF, LTBP1, MATN2, ALPL, PCDH9, CDH20, EGFLAM, DNER, LRP1B, HPCAL1, UNC13B, PLS1, NIN, SMOC2, PCP4, MCTP2, MYL1, UMODL1, NELL1, ZZEF1, SELENON, REPS1, PCDH15, CDH23, LALBA, FBLN5, ENPP3, ITSN2, TENM2, PLCB4, CRACR2A, RPH3A, ESYT2, ENPP1, RASGRP1, PAMR1, CDH26, CABYR, FAT1, CALN1, CLSTN2, SDF4, PLA2G4A, IQGAP1, NRXN1, CIB4, FSTL1, SVEP1, CELSR2, PRSS2, PCDH11X, ANXA4, CACNA1E, ADGRE3, EML1, EFHD2, DGKG, CCBE1, PLA2G12B, HMCN1, EFHB, S100B, EFCAB14, DSG1, PP2R3A, CDH5, SCGN, SUSD1, PCDH8, FAT4, RUNX1, PLCZ1, EDIL3, MYL12B, NCS1, CDH9, CDH2, EYS, MCC, CDH12, FBLN1, CDH17, CDH13, USP32, ASTN2, NECAB1, SLIT2, KCNIP4, MGMT, VCAN, SLIT3, LOXL2, PITPNM3, SPOCK3, HSPG2, FSTL4                                                                                                                                                                                                                                                                                                                                                                                                                                                                                                                                                                                                                                        |
| GO:0016740 | transferase activity | 0.00026602777488331307 | MTOR, TMTC1, ULK2, NLK, FTO, KSR1, TTC3, ZDHHC21, NME7, PRDM16, LPCAT2, F13A1, GPHN, PIK3C3, GALNT1, PCMTD1, ALK, PJA2, GLYAT, MAP3K9, MYO3B, MOCOS, SETD2, TNIK, NEK4, EGFR, CDK12, PRKACB, NEK7, RNF220, UGT3A2, NEDD4, GNPTAB, NSMCE2, SGMS1, CHSY1, B3GALT5, NTRK3, LARGE1, FLT1, GK, NAT1, DGKI, PRKD1, PAK1, EPHA7, CHSY3, PELI2, TAOK3, AGK, UBE2L3, SMYD3, HERC2, LRIG1, WDSUB1, NEDD4L, UBE2G1, ADK, RPS6KA2, KLHL13, DCLK1, PARP15, AURKA, DTWD2, MARCHF1, UPP2, MAP4K4, BMPR1B, HADHB, PAK3, RANBP2, ITPKB, UBE2E2, HHAT, CHST8, SCP2, PRKC, ST8SIA5, HECW1, GALNT14, RIPK4, MAPK1, MGAT5, ZNRF3, XXYL T1, UBE2O, GALNT16, PI4K2B, RRGTT, STK38, MYLK3, EFEMP1, DC AF1, TLK1, ZDHHC14, BIRC6, PPIP5K1, HS3ST2, LCLAT1, UBE3D, PAK5, ST6GALNAC3, PDZRN3, DAPK1, ACSM2B, STK32B, ALPK2, THUMPD2, MELK, HECTD4, SUGCT, MAPKAP1, PIAS1, UBE2R2, BLK, NUAK1, ABL1, AGPS, HDAC4, PRKAA1, MAST4, ATE1, HECTD2, CAMK4, ZC3HAV1, TGM1, PEAK1, LATS2, MUSK, GALNTL6, SETDB2, PRKCE, WNK2, B4GALNT3, DGKB, CERS6, GLT1D1, ALPK3, TRIO, EXT1, RPS6KA3, MARCHF8, TRIM5, ST8SIA6, ALG10B, LTBP1, STK38L, GALNT10, PRMT8, MARK2, C10ORF90, HERC1, EPHA6, SH3KBP1, HIPK3, CDKN2C, GRK3, STK10, TMTC2, MYLK2, XYLT1, CCND3, STK32A, AK8, CRIM1, FUT9, GXYLT2, CEPT1, BRCA2, GALNT13, NRK, MAGI3, AGL, RC3H2, MYLK4, CDC42BPB, VRK1, BMP2K, RNF38, POLR3A, CDS2, UST, TRAF3, DSTYK, B4GALT6, PFKFB4, TRIT1, CGAS, PRDM10, NEK10, PIGN, ATF2, ZZEF1, UBR1, MAP4K3, HS3ST4, MED27, MYO3A, AKAP10, UBE2E1, PRKN, CDC42BPA, MAPK10, FBXO3, WSB1, TRPM6, LALBA, PRKCH, HUNK, MKNK1, POLR1D, TRMT61B, ST8SIA1, MOK, ROCK1, LYN, EIF2B3, GSTA3, DTX1, CHKA, FANCL, RNF152, INSR, CUL5, NEK6, HECTD1, ASH1L, SIAH2, PGAP4, ERN2, TRIM58, ZD |

|            |                                                               |                        |                                                                                                                                                                                                                                                                                                                                                                                                                                                                                                                                                                                                                                                                                                                                                                                                                                                                                                                                                                                                                                                                                                                                                                                                                                                                                                    |
|------------|---------------------------------------------------------------|------------------------|----------------------------------------------------------------------------------------------------------------------------------------------------------------------------------------------------------------------------------------------------------------------------------------------------------------------------------------------------------------------------------------------------------------------------------------------------------------------------------------------------------------------------------------------------------------------------------------------------------------------------------------------------------------------------------------------------------------------------------------------------------------------------------------------------------------------------------------------------------------------------------------------------------------------------------------------------------------------------------------------------------------------------------------------------------------------------------------------------------------------------------------------------------------------------------------------------------------------------------------------------------------------------------------------------|
|            |                                                               |                        | <p>HHC17, NSD2, CERS3, PTAR1, LTN1, MOCS2, UCK2, CSNK2A1, EOGT, PRKG1, HS6ST3, ASB4, ETNPPL, MARCHF11, HADHA, LPGAT1, NSUN6, ROR2, RIOK1, SOSTDC1, PRKAA2, GLYATL1, RNF182, PLA2G4A, HIPK1, DGKK, FICD, AKT3, INMT, MINDY4, JAK2, CREBBP, MRM1, TNKS, SIAH3, UFL1, GLYATL2, PRKCB, FBXW2, GOT2, ST6GAL2, BRD4, NRBP1, MAST2, PCMTD2, EXT2, MAP2K6, DGKG, MARCHF6, MAPK8, UBE2J2, ASB2, UBE2QL1, ST8SIA4, MAP3K5, MAP3K4, TRIM43B, PRDM13, TRIM43, MAGEL2, PKN2, FBXW8, NSMCE1, PASK, FGR, TRIM23, TOP1, RNF8, EPHA4, PPIP5K2, MECOM, GLYATL3, NTRK2, ACSM2A, EXTL3, TRPM7, PRKAB1, HS6ST1, PTK2, MARK4, UBE3A, AMFR, POMT2, DPY19L2, CNKSR1, NSUN2, GALNT18, HKDC1, FYN, BUB1, DPY19L1, UHRF2, GALNT17, UGP2, MAPK9, STT3A, ROR1, GALNT2, FUT8, HECW2, EPHB1, ZDHHC18, ADCK1, RPS6KA5, NRP1, PRKCA, COX10, ATPSCKMT, RNF215, MOGAT3, FHIT, CROT, RNF138, RC3H1, ZNF738, BCR, TUT4, SNRK, PGM2L1, STK36, RAG1, PRDM15, EPHB2, CSNK1G1, RNF11, CD38, PPIL2, CDK14, MET, DLG2, CAMK1G, IBA57, METTL15, MAGI2, PRDM11, KALRN, CHST3, TRIM9, RNF217, AK3, KMT2C, WSCD1, ELOVL7, ABL2, PARP8, CMPK1, ESCO1, ERBB4, PRKCQ, MGMT, AK9, NSDL1, EHMT1, PIGB, ZDHHC11B, CAMK1D, PIK3R3, CDKAL1, AK2, FER, FGGY, CHFR, PCMT1, ROCK2, PRDM1, ATAT1, PDK1, TRIM2, BARD1, PNPLA3, STK3, IGF1R, PRKAG2, AKAP13</p> |
| GO:0008066 | glutamate receptor activity                                   | 0.0002687706244589073  | GRIK3, GRIA1, GRM7, GRIK4, GRM1, GRM8, GRID2, GRIK2, GRIN2A, GRID1, GRIN2B, GRIK1, GRM5, GRM3, GRIA4                                                                                                                                                                                                                                                                                                                                                                                                                                                                                                                                                                                                                                                                                                                                                                                                                                                                                                                                                                                                                                                                                                                                                                                               |
| GO:0008047 | enzyme activator activity                                     | 0.00005834226341997858 | GARNL3, MYO9A, PLCB1, DLC1, ARHGAP26, ALK, RIN2, ARHGAP24, EGFR, RGS3, DOCK2, RABEP1, TBC1D19, RAPGEF2, ADGRB3, UBE2L3, RPTOR, RALGAP1, TBCD, PPP1R12B, APP, ARHGAP44, BMPR1B, RANBP2, RGS20, RAP1GDS1, ARHGAP32, RGS9, RABGAP1L, NRG3, TBC1D22A, CHN1, MOB3B, ARAP2, ARHGEF12, PPP2R5E, TBC1D9, BCAS3, CLPX, RANBP3L, TBC1D5, DOCK4, NRG1, PRKCE, ASAP2, RGS12, EGF, NSMAF, RFC1, MARK2, MNAT1, DOCK5, TGFA, BMP2, EVI5, RALGAP2, SGSM1, TBC1D4, RIN3, ARHGAP42, GNAQ, DOCK1, RAP1GAP, SRGAP2, SEC23B, MOB1B, TBC1D13, SH3PXD2A, ALS2, RACGAP1, VAV3, ARHGAP28, ARHGAP31, MMP16, PSAP, GPRC5C, IQGAP1, SIPA1L2, ALKAL2, MADD, PCNA, AGAP9, MAP2K6, ABI1, PARK7, NCA PG2, DBF4B, TRIM23, DNMT3L, ARHGAP12, ASAP1, FYN, NCS1, GRM5, TBC1D1, NRP1, BCR, RGS6, ARFGAP3, FBLN1, SRGAP3, BCL2L13, RGPD4, GNAS, TIAM2, GAPVD1, ERBB4, RGPD2, SIPA1L3, EFNA5, ARHGEF11, MYO9B, STARD13, AGAP1, RGS8, RGS7, STK3, RAB3GAP2, PRKAG2, DNML1                                                                                                                                                                                                                                                                                                                                                                  |
| GO:0015318 | inorganic molecular entity transmembrane transporter activity | 0.0010498514691585723  | UNC80, CACNA2D3, SLC17A1, SLC24A2, KCNH5, SLC37A1, PIEZO2, ITPR2, KCNMA1, CHRNA7, GABRB3, ANO6, CACNG2, SLC4A10, GRIK3, ATP2B2, TUSC3, GABRB1, GRIA1, SLC39A12, SLC8A3, GABRA6, TMEM38B, SLC24A3, TRPM1, SLC39A11, CACNA1C, CACNB2, GABRG2, TMC1, SLC8A1, KCNE4, KCNK10, TRPC5, CLIC6, RYR3, KCNJ1, TRPC7, SLC45A4, NIPAL2, LRRC38, GRIK4, KCNS3, GABRG1, SLC24A4, SCN2A, RYR2, SLC9C1, SLC36A1, SLC1A1, SLC12A8, KCNH1, ANO4, GRID2, ABCC9, P2RX6, ATP8A1, OPRM1, ABCC4, CNM4, SLC2A13, KCND2, NIPA2, TMC7, ATP6V1E1, CACNA1I, KCNJ15, SCN11A, SLC23A2, SLC39A6, KCNH8, SLC37A2, SLC9A4, GABRR2, GRIK2, LRRC8B, CFTR, SLC30A10, GRIN2A, TRPM6, SLC12A1, KCNQ3, SLC4A4, SCN10A, KCND3, KCNN3, SLC15A2, SLC13A5, CUL5, GRID1, COX5A, GABRG3, ZDHHC17, KCNC1, HCN1, GRIN2B, KCNK5, SLC40A1, SLC5A12, COX7A2L, SLC1A7, TRPV5, ABCC8, CACNA1E, ATP2B1, CLCA4, OTOP1, SLC6A1, SHROOM2, SLC6A11, KCNJ18, ATP13A3, SLC5A9, ATP6V1C2, SLC10A6, ATP6V1B2, GABRA5, TRPM7, GRIK1, APOL1, SLC26A2, SLC9A5, SLC5A1, ANO10, SCN8A, TMEM63C, NC S1, ATP5PF, NALCN, TRPM3, SLC39A8, SLC14A1, KCNJ6, ATP6V0D2, CACNG3, SLC1A2, GABRA2, KCNIP4, SLC6A3, ASIC2, KCNQ5, CACNA2D1, SLC25A18, ANO2, GRIA4, CATSPER2, CLCN5, SLC13A4, KCNAB1                                                                              |
| GO:0022836 | gated channel activity                                        | 0.0013743587217693615  | CACNA2D3, KCNH5, PIEZO2, ITPR2, KCNMA1, CHRNA7, GABRB3, ANO6, CACNG2, GRIK3, GABRB1, GRIA1, GABRA6, TRPM1, CACNA1C, CACNB2, GABRG2, TMC1, KCNE4, KCNK10, CLIC6, RYR3, KCNJ1, LRR                                                                                                                                                                                                                                                                                                                                                                                                                                                                                                                                                                                                                                                                                                                                                                                                                                                                                                                                                                                                                                                                                                                   |

|            |                    |                       |                                                                                                                                                                                                                                                                                                                                                                                                                                                                                                                                                                                                                                                                                                                                                                                                                                                                                                                                                                                                                                                                                                                                                                                                                                                                                                                                                                                                                                                                                                                                                                                                                                                                                                                                                                                                                                                                                                                                                                                                                                                                                                                                                                                                                                                                                                                                                                                                                                                                                                                                                                                                                                                                                                                                                                                                                                                                                                                                                                                                                                                                                 |
|------------|--------------------|-----------------------|---------------------------------------------------------------------------------------------------------------------------------------------------------------------------------------------------------------------------------------------------------------------------------------------------------------------------------------------------------------------------------------------------------------------------------------------------------------------------------------------------------------------------------------------------------------------------------------------------------------------------------------------------------------------------------------------------------------------------------------------------------------------------------------------------------------------------------------------------------------------------------------------------------------------------------------------------------------------------------------------------------------------------------------------------------------------------------------------------------------------------------------------------------------------------------------------------------------------------------------------------------------------------------------------------------------------------------------------------------------------------------------------------------------------------------------------------------------------------------------------------------------------------------------------------------------------------------------------------------------------------------------------------------------------------------------------------------------------------------------------------------------------------------------------------------------------------------------------------------------------------------------------------------------------------------------------------------------------------------------------------------------------------------------------------------------------------------------------------------------------------------------------------------------------------------------------------------------------------------------------------------------------------------------------------------------------------------------------------------------------------------------------------------------------------------------------------------------------------------------------------------------------------------------------------------------------------------------------------------------------------------------------------------------------------------------------------------------------------------------------------------------------------------------------------------------------------------------------------------------------------------------------------------------------------------------------------------------------------------------------------------------------------------------------------------------------------------|
|            |                    |                       | C38,GRIK4,KCNS3,GABRG1,SCN2A,RYR2,KCNH1,ANO4,GRID2,ABCC9,P2RX6,OPRM1,KCND2,TMC7,CACNA1I,KCNJ15,SCN11A,KCNH8,GABRR2,GRIK2,CFTR,GRIN2A,KCNQ3,SCN10A,KCND3,KCNN3,GRID1,GABRG3,KCNC1,HCN1,GRIN2B,KCNK5,ABCC8,CACNA1E,CLCA4,SHROOM2,KCNJ18,GABRA5,GRIK1,ANO10,SCN8A,TMEM63C,NCS1,NALCN,TRPM3,KCNJ6,CACNG3,GABRA2,KCNIP4,ASIC2,KCNQ5,CACNA2D1,ANO2,GRIA4,CATSPER2,CLCN5,KCNAB1                                                                                                                                                                                                                                                                                                                                                                                                                                                                                                                                                                                                                                                                                                                                                                                                                                                                                                                                                                                                                                                                                                                                                                                                                                                                                                                                                                                                                                                                                                                                                                                                                                                                                                                                                                                                                                                                                                                                                                                                                                                                                                                                                                                                                                                                                                                                                                                                                                                                                                                                                                                                                                                                                                        |
| GO:0003824 | catalytic activity | 0.0016781687582752816 | MTOR,IMMP2L,PTPRD,TMTC1,ULK2,NLK,LONP2,FTO,KSR1,AGBL1,PLCB1,TTC3,MX2,TMPRSS2,LIP1,ARL15,MICAL3,MGAM,DPPI0,ZDHHC21,PTPRA,PDE4D,RALA,NME7,IL1RAPL2,PRDM16,ALDH1A2,LPCAT2,F13A1,GPHN,PUDP,PIK3C3,AKR1C3,GALNT1,NAV2,ENPEP,MYO1E,PLPPR1,PCMTD1,ALK,CDYL2,PJA2,THSD4,PAPPA2,ERCC6L2,HACD2,HLCS,GLYAT,EGLN3,MAP3K9,MYO3B,PGBD5,MOCOS,CPA6,PLPPR5,SETD2,TNIK,PTPRJ,KDM4C,NEK4,EGFR,USP14,CDK12,PRKACB,NEK7,RGS3,RNF220,UGT3A2,NEDD4,SND1,GNPTAB,NSMCE2,PSMB2,SGMS1,CECR2,CHSY1,PTPN4,B3GALT5,ATP2B2,NTRK3,LARGE1,PDE1C,CYP2C9,FLT1,RFCD3,ADAMTS6,GK,TASP1,AOAH,NAT1,DGKI,PRKD1,TPTE2,PAK1,GMDS,EPHA7,CHRM3,ADSS2,CHSY3,PELI2,ARSB,CPS1,TAOK3,AGK,ADAMTSL1,BCKDHB,UBE2L3,PTPRN2,SMYD3,MPPED1,TYW1,HERC2,LRGUK,SEPTIN9,DNAH6,WDSUB1,DHX32,ATG1,NEDD4L,ADAM32,ADAM10,HDAC9,ATF7IP,UBE2G1,IL1R1,ADK,RPS6KA2,KYNU,KDM1B,KLHL13,DCLK1,USP18,ACER2,PARP15,AURKA,PARN,PTPRR,DTWD2,FIG4,MARCHF1,ABCG8,UPP2,MAP4K4,ABCD2,BMPRI1B,PCSK6,HADHB,RAB8B,PAK3,PDE1A,TTL17,RANBP2,ITPKB,RGS20,PDE10A,UBE2E2,HHAT,RNLS,CHST8,DNM3,SCP2,PRKCZ,MAN2A2,DIP2A,MSH6,RAB27B,ST8SIA5,HEATR4,RGS9,HECW1,ADAMTS17,SENP6,DUSP22,GALNT14,PDXDC1,PPM1L,RIPK4,MAPK1,MGAT5,ABCD3,DNAH14,ADAM22,USP25,PLG,PAIPA,ZNRF3,CA5A,XXYLT1,UBE2O,GALNT16,PI4K2B,RNGTT,MTMR10,CHD6,STK38,PTPN13,MYLK3,ACSBG1,EFEMP1,TLL1,DCAF1,TLK1,ZDHHC14,CORIN,BIRC6,PIIP5K1,HS3ST2,LCLAT1,ERMP1,SYNJ1,ADAMTS3,UBE3D,PTPRK,PAK5,ST6GALNAC3,PDZRN3,DAPK1,NAV3,FAR2,ACSM2B,AGO2,STK32B,ALPK2,JARID2,RAB22A,CPE,THUMP2,ADGRV1,MELK,HECTD4,CLPX,ASAH2B,SHOC1,DUSP16,SUGCT,SMARCA4,USP8,MAPKAP1,EFTUD2,PIAS1,UBE2R2,BLK,OLA1,ATRX,NUAK1,PTPRT,ABL1,AGPS,PTPN12,HDAC4,OXR1,PRKAA1,DROSHA,TTL15,APLF,ADAMTS14,MAST4,GUCY1A2,ATE1,SLFN11,RAP1A,ACSS3,HECTD2,CAMK4,MANBA,INPP5A,CPSF3,ZC3HAV1,GALC,TGM1,PEAK1,LATS2,PAH,ATP11C,DHX40,MUSK,GALNTL6,SMARCA1,SETDB2,PRKCE,PGM5,MEATAP1D,NXN,WNK2,B4GALNT3,DGKB,USP33,CERS6,RGS12,PTPRO,GLT1D1,ALPK3,TRIO,PDE3A,EXT1,LNPEP,ADAMTS2,RPS6KA3,MARCHF8,ATP8A2,MTMR3,PTPN2,TRIM5,ATXN3,RFC1,ST8SIA6,ALG10B,ATP8A1,LTBP1,STK38L,GALNT10,KDM7A,PLD5,ABCC4,PRMT8,PLCXD3,FANCM,CYBRD1,CYP4A11,INPP4B,FARS2,GTFF2F2,MARK2,GMPR,RCL1,ALPL,C10ORF90,ABHD17C,HERC1,MSH2,MPPED2,GNAL,EPHA6,SH3KBP1,ATL1,HIPK3,CDKN2C,GRK3,CPXM2,NOS2,AFG3L2,STK10,RBBP8,TMTC2,ADAM12,MYLK2,XYLT1,HMGA2,GBP6,CCND3,FOLH1,ECE1,STK32A,LYPLA1,AK8,CWC27,PLCE1,CRIM1,XPNPEP1,FUT9,GXYLT2,GSR,CAPN5,CYP4Z1,MSRA,TARS3,FKBP5,MTHFD1L,CEPT1,BRCA2,AQR,GALNT13,EXD3,BLM,NRK,MAGI3,ADCY10,AGL,RC3H2,MYLK4,ATP9A,CDC42BPB,DSE,VRK1,GNAI1,BMP2K,RNF38,PGPEP1,PDE6C,POLR3A,RELN,HMGB1,GNAQ,CDS2,UST,TRAF3,DSTYK,B4GALT6,PFKFB4,RAP1GAP,ENOX1,TRIT1,GADL1,SMARCA2,ARJ,CGAS,CASP5,IDE,KIF21A,KIF15,PRDM10,RERGL,BTAF1,PEX6,NEK10,PIGN,ATF2,CYLD,ADARB2,MX1,CFTR,ME2,NEU3,ZZEF1,ATP10B,UBR1,SMPDL3A,CHRM5,MAP4K3,HS3ST4,MED27,SELENON,MYO3A,AKAP10,UBE2E1,PTPRE,PRKN,AGMO,MTMR2,CDC42BPA,MAPK10,PNPLA7,FBXO3,HEPHL1,TXNRD2,WSB1,USP43,TRPM6,LALBA,PRKCH,HUNK,PEPD,CPVL,ACO1,DHRS11,CNOT6L,MKNK1,DMC1,POLR1D,PTPRB,AOPEP,TRMT61B,PDE6A,ST8SIA1,USP7,GLB1L3,ENPP3,HAAO,FAH,MOK,RALB,ADGRG6,PPA2,FAR1,CA1,ROCK1,LYN,VCAM1,CTSB,EIF2B3,GSTA3,DTX1,ADA2,CHKA, |



|            |                                           |                       |                                                                                                                                                                                                                                                                                                                                                                                                                                                                                                                                                                                                                                                                                                                                                                                                                                                                                                                                                                                                                                                                                                                                                                                                                                                                                                                                                                                                                                                                                                                                                                                                                                                                                                                                                                                                                                                                                                                                                                                                                                                                                                                                                                                                                                                                                                                                                                                                                                                                                                                                                                                                                                  |
|------------|-------------------------------------------|-----------------------|----------------------------------------------------------------------------------------------------------------------------------------------------------------------------------------------------------------------------------------------------------------------------------------------------------------------------------------------------------------------------------------------------------------------------------------------------------------------------------------------------------------------------------------------------------------------------------------------------------------------------------------------------------------------------------------------------------------------------------------------------------------------------------------------------------------------------------------------------------------------------------------------------------------------------------------------------------------------------------------------------------------------------------------------------------------------------------------------------------------------------------------------------------------------------------------------------------------------------------------------------------------------------------------------------------------------------------------------------------------------------------------------------------------------------------------------------------------------------------------------------------------------------------------------------------------------------------------------------------------------------------------------------------------------------------------------------------------------------------------------------------------------------------------------------------------------------------------------------------------------------------------------------------------------------------------------------------------------------------------------------------------------------------------------------------------------------------------------------------------------------------------------------------------------------------------------------------------------------------------------------------------------------------------------------------------------------------------------------------------------------------------------------------------------------------------------------------------------------------------------------------------------------------------------------------------------------------------------------------------------------------|
|            |                                           |                       | <p>PLCB4,MMP16,PRUNE2,FANCL,DPYSL5,RRAGD,CRACR2A,RNF152,OTUD7A,INSR,CUL5,NEK6,HECTD1,HDAC11,LYPLAL1,DDHD1,ADAMTS19,DPYD,ASH1L,SIAH2,PIGK,PGAP4,COX5A,ABCA4,TRABD2B,UFD1,ERN2,MBTPS2,TRIM58,PLPP4,ZDHHC17,NSD2,CERS3,PTAR1,LTN1,SAMHD1,HSD17B14,ENPP1,ENTPD5,MOCS2,SDR42E2,PAMR1,PXDNL,UCK2,CSNK2A1,PPIL6,EOGT,CTDP1,PRKG1,HS6ST3,ASB4,INO80,ETNPPL,DHRS3,KIF21B,SYNJ2,MA RCHF11,HADHA,LPGAT1,IPCEF1,NSUN6,ATG4B,CDC14B,KDM6A,ROR2,NPL,KL,HGD,OTOG,RIOK1,SOSTDC1,TOP3B,PRKAA2,DIRAS2,GLYATL1,QSOX2,RNF182,ERO1B,ABHD2,PLA2G4A,RAB12,KIFC1,COX7A2L,MORC2,THNSL2,EPHX4,HIPK1,DGKK,CYP4F22,PBLD,FICD,TUBB6,AKT3,INMT-MINDY4,JAK2,ADAM28,MPPE1,BPNT1,PTGS1,PRSS2,FH,TDP1,CREBBP,MRM1,TNKS,ARL11,PCNA,SIAH3,UFL1,ADAMTS5,GLYATL2,PRKCB,FBXW2,GOT2,KIF6,MIPEP,OVCH1,RFC2,ST6GAL2,BRD4,SMPD4,NRBP1,ATP2B1,IARS2,CLCA4,DGLUCY,NOXRED1,ASS1,CNDP2,SAR1A,ADCY9,MAST2,HPSE2,PCMTD2,EXT2,FRA10AC1,PDP2,GRXCR1,SDS,MAP2K6,DGKG,VAT1L,MARCHF6,CEMI P,PARK7,ADAMTS18,MAPK8,TOP3A,EIF3F,PPME1,UBE2J2,PLA2G12B,ASB2,HFM1,ATP13A3,DHTKD1,UBE2QL1,ACACA,ST8SIA4,NDUFA10,ARL4C,ECHDC1,OXNAD1,MAP3K5,MAP3K4,TRIM43B,PRDM13,TRIM43,HSDL2,ERI1,SUMF1,MAGEL2,PKN2,PDE2A,RAB38,LRRC2,FBXW8,SPPL2B,NSMCE1,WWOX,PASK,FGR,TRIM23,TOP1,TINAG,C2,RNF8,EPHA4,PPIP5K2,MECOM,GLYATL3,NTRK2,IL1RAPL1,MGAM2,ACSM2A,ADAMTS9,FRRS1,CD101,EXTL3,TRPM7,PRKAB1,IREB2,HS6ST1,PTK2,MARK4,CD5L,TPH2,APIP,UBE3A,IMPA2,AKR1B1,AMFR,CTSE,POMT2,PLCZ1,DPY19L2,TPTE,CNKSR1,NSUN2,SLC27A6,GALNT18,HKDC1,ADAMTS16,ACOXL,MDN1,FYN,BUB1,KDM5A,DPY19L1,PPM1F,ARL13B,UHRF2,HDAC2,SACM1L,GALNT17,ATP5PF,ATP9B,UGP2,MTMR7,MAPK9,STT3A,ROR1,GALNT2,FUT8,TET1,HECW2,OVCH2,RAD9A,XRN2,PHLPP1,EPHB1,ZDHHC18,DDX10,ADCK1,RPS6KA5,PTPRG,NRP1,PRKCA,GBP4,MRPL58,COX10,ATPSCKMT,RNF215,USP24,MOGAT3,FHIT,PCCA,CROT,RNF138,RC3H1,POR,EFL1,ZNF738,BCR,TUT4,RGS6,RERG,KIF16B,SNRK,SENP8,USP49,PGM2L1,STK36,RAG1,DNPEP,CYP4B1,RRAS2,GNA14,RABL2A,PRDM15,DPP6,EPHB2,CSNK1G1,RNF11,CD38,EYA4,DPH6,PPIL2,PRSS51,CDK14,MET,SPPL3,DLG2,CAMK1G,IBA57,METTLL15,USP32,MAGI2,PRDM11,AIFM3,ADAM29,KALRN,ME3,CHST3,GNAS,CA10,CPQ,TRIM9,DHX29,CHIT1,TMPRSS15,RNF217,PRSS23,BTD,BPTF,AK3,KMT2C,WSCD1,DDX6,ELOVL7,ABL2,MMP26,BACE2,EYA1,TLL11,PARP8,CMPK1,TMPRSS3,CNOT7,ESCO1,PLCL1,ERBB4,TRHDE,PRKCQ,MGMT,AK9,NOS1,GLDC,CHD9,MTREX,RAB27A,NSD1,EHMT1,USP31,KIF13A,SDR42E1,MYO9B,KDM4B,CYP2C8,LOXL2,ORC4,PIGB,AGO3,LARS2,ZDHHC11B,RAD51B,CAMK1D,PIK3R3,MACROD2,CFAP44,CDKAL1,AK2,FER,EYA2,PITPNM3,FGGY,CHFR,PCMT1,AUH,OARD1,AGAP1,ROCK2,PRDM1,ATAT1,NARS2,PPP1CB,RGS8,RAB31,PDK1,PTPRQ,TRIM2,HSD17B2,RGS7,KIF7,PCSK2,BARD1,PALD1,PNPLA3,STK3,PNPLA8,IGF1R,KCNAB1,PRKAG2,APMAP,AKAP13,MORC3,ATP10A,SEPTIN6,DNM1L</p> |
| GO:0051020 | GTPase binding                            | 0.001743249940952738  | <p>MICAL3,ERC1,MYO5A,RIMS1,FGD4,RIMS2,RIN2,DENND1A,DOCK2,DIAPH3,DGKI,PAK1,RANBP17,ARHGAP44,PAK3,RANBP2,RABGAP1L,ANKFY1,IPO11,MAPKAP1,DOCK4,DMXL2,RAP1A,USP33,AMBRA1,TNPO3,DOCK5,PLCE1,CDC42BPB,EVI5,SGSM1,RANBP9,MYRIP,RIN3,UNC13B,DOCK1,RAP1GAP,SRGAP2,CCDC186,FARP1,CSE1L,TBC1D13,PRKCH,ALS2,ROCK1,RRAGD,RNF152,RPH3A,MICALL2,IQGAP1,YBX3,AIMP1,ADCYAP1R1,RAPGEF4,CYFIP2,PKN2,DIAPH1,CYFIP1,BICD1,XPO7,DOCK3,MYO5B,GAPVD1,EXOC4,NDRG1,MYO9B,FER,EPS8,ROCK2,RAB3GAP2,AKAP13,DNM1L</p>                                                                                                                                                                                                                                                                                                                                                                                                                                                                                                                                                                                                                                                                                                                                                                                                                                                                                                                                                                                                                                                                                                                                                                                                                                                                                                                                                                                                                                                                                                                                                                                                                                                                                                                                                                                                                                                                                                                                                                                                                                                                                                                                           |
| GO:0022890 | inorganic cation transmembrane transporte | 0.0018332682329047021 | <p>UNC80,CACNA2D3,SLC17A1,SLC24A2,KCNH5,PIEZO2,ITPR2,KCNMA1,CHRNA7,ANO6,CACNG2,SLC4A10,GRIK3,ATP2B2,TUSC3,GRIA1,SLC39A12,SLC8A3,TMEM38B,SLC24A3,TRPM1,SLC39A11,CACNA1C,CACNB2,TMC1,SLC8A1,KCNE4,KCNK10,TRPC5,RYR3,KCNJ1,TRPC7,SLC45A4,NIPAL2,LRRC38,GRIK4,KCNS3,SLC24A4,SCN2A,RYR2,SLC9C1,SLC36A1,SLC1A1,SLC12A8,KCNH</p>                                                                                                                                                                                                                                                                                                                                                                                                                                                                                                                                                                                                                                                                                                                                                                                                                                                                                                                                                                                                                                                                                                                                                                                                                                                                                                                                                                                                                                                                                                                                                                                                                                                                                                                                                                                                                                                                                                                                                                                                                                                                                                                                                                                                                                                                                                        |

|            |                                           |                       |                                                                                                                                                                                                                                                                                                                                                                                                                                                                                                                                                                                                                                                                                                                                                                                                                                                                                                            |
|------------|-------------------------------------------|-----------------------|------------------------------------------------------------------------------------------------------------------------------------------------------------------------------------------------------------------------------------------------------------------------------------------------------------------------------------------------------------------------------------------------------------------------------------------------------------------------------------------------------------------------------------------------------------------------------------------------------------------------------------------------------------------------------------------------------------------------------------------------------------------------------------------------------------------------------------------------------------------------------------------------------------|
|            | r activity                                |                       | 1, ABCC9, P2RX6, ATP8A1, OPRM1, CNM4, SLC2A13, KCND2, NIPA2, ATP6V1E1, CACNA1I, KCNJ15, SCN11A, SLC23A2, SLC39A6, KCNH8, SLC9A4, GRIK2, SLC30A10, GRIN2A, TRPM6, SLC12A1, KCNQ3, SLC4A4, SCN10A, KCND3, KCNN3, SLC15A2, SLC13A5, CUL5, COX5A, ZDHHC17, KCNC1, HCN1, GRIN2B, KCNK5, SLC40A1, SLC5A12, COX7A2L, SLC1A7, TRPV5, ABCC8, CACNA1E, ATP2B1, OTOF1, SLC6A1, SHROOM2, SLC6A11, KCNJ18, ATP13A3, SLC5A9, ATP6V1C2, SLC10A6, ATP6V1B2, TRPM7, GRIK1, SLC9A5, SLC5A1, ANO10, SCN8A, TMEM63C, NCS1, ATP5PF, NALCN, TRPM3, SLC39A8, KCNJ6, ATP6V0D2, CACNG3, SLC1A2, KCNIP4, SLC6A3, ASIC2, KCNQ5, CACNA2D1, SLC25A18, GRIA4, CATSPER2, CLCN5, SLC13A4, KCNAB1                                                                                                                                                                                                                                           |
| GO:0015631 | tubulin binding                           | 0.0025577797014176553 | AGBL1, MX2, RP1, DDC1, MAP4, APC, SETD2, MACF1, DIAPH3, PAK1, KIF4A, TBCD, MTUS1, DCLK1, MAPRE2, CCSER2, MAP4K4, FMN2, TTLL7, DIP2B, DNM3, MTUS2, FMN1, PAFAH1B1, NAV3, BCAS3, DST, GAS2, TTLL5, CLIP1, PEX14, ARHGEF7, C10ORF90, VPS41, BRCA2, DNAL1, TUBGCP3, MDM1, NIN, HAUS6, KIF21A, KIF15, MAP2, BBS4, MX1, CEP44, PRKN, RACGAP1, LYN, KIF11, DPYSL5, IFT81, HDGFL3, INO80, KIF21B, SKA1, PACRG, MAP6, KIFC1, CACYBP, CENPE, KIF6, MTCL1, EML1, MAST2, ARL4C, MARK4, DIAPH1, SAXO1, CCDC88A, SPAG6, FYN, KIF16B, TOGARAM1, TTLL11, NDRG1, GAS2L1, KIF13A, CEP57L1, IRAG2, HTT, EML6, WASHC1, HOOK3, KIF7, DNML                                                                                                                                                                                                                                                                                       |
| GO:0005216 | ion channel activity                      | 0.003254780822118313  | UNC80, CACNA2D3, SLC24A2, KCNH5, PIEZO2, ITPR2, KCNMA1, CHRNA7, GABRB3, ANO6, CACNG2, GRIK3, GABRB1, GRIA1, GABRA6, TMEM38B, SLC24A3, TRPM1, CACNA1C, CACNB2, GABRG2, TMC1, KCNE4, KCNK10, TRPC5, CLIC6, RYR3, KCNJ1, TRPC7, LRRC38, GRIK4, KCNS3, GABRG1, SLC24A4, SCN2A, RYR2, SLC9C1, SLC1A1, KCNH1, ANO4, GRID2, ABCC9, P2RX6, OPRM1, KCND2, TMC7, CACNA1I, KCNJ15, SCN11A, KCNH8, GABRR2, GRIK2, LRRC8B, CFTR, GRIN2A, TRPM6, KCNQ3, SCN10A, KCND3, KCNN3, CUL5, GRID1, GABRG3, KCNC1, HCN1, GRIN2B, KCNK5, TRPV5, ABCC8, CACNA1E, CLCA4, OTOF1, SHROOM2, KCNJ18, GABRA5, TRPM7, GRIK1, APOL1, ANO10, SCN8A, TMEM63C, NCS1, ATP5PF, NALCN, TRPM3, KCNJ6, CACNG3, GABRA2, KCNIP4, ASIC2, KCNQ5, CACNA2D1, ANO2, GRIA4, CATSPER2, CLCN5, KCNAB1                                                                                                                                                         |
| GO:0051015 | actin filament binding                    | 0.003522468749321158  | NEBL, SVIL, TLN2, MICAL3, MYO5A, MYO1E, MYO5C, EGFR, MACF1, CTNNA3, CTNNA1, CACNB2, VCL, CTNNA2, ABLIM1, CORO2B, TPM1, CTNNA1, PPP1R9A, MPRIP, SYNE2, AIF1L, XIRP2, ABL1, GAS2, MYO10, SYNE1, ACTR3C, MYOM2, HIP1, MYOM1, PLS1, MYO1D, SHROOM3, FLNB, UTRN, MICALL2, ACTR2, IQGAP1, LASP1, USH1C, SHROOM2, MYH13, CYFIP1, PSTPIP2, SPTB, MYO5B, NRAP, ABL2, PKNOX2, FHOD3, ANTXR1, MYH15, GAS2L1, MYO9B                                                                                                                                                                                                                                                                                                                                                                                                                                                                                                    |
| GO:0035091 | phosphatidylinositol binding              | 0.004883516932728665  | EXOC1L, PLCB1, SVIL, ITPR2, MYO1E, FCHO2, DENND1A, TOM1L2, SYT1, ARHGAP32, KCNJ1, SYT10, ANKFY1, SNX30, SNX29, ARAP2, PARD3B, BCAS3, PARD3, MAPKAP1, KCNH1, MYO10, PLEKHA8, STXB P6, MCF2L, ZFYVE9, HIP1, SNX3, CLVS1, SNX8, CGAS, SNX6, ZFYVE26, CLVS2, SH3PXD2A, FRMPD4, RACGAP1, SNX25, PLEKHB2, HS1BP3, PIGK, RPH3A, TOM1, ESYT2, SNX9, PLA2G4A, IQGAP1, SNAP91, MPPE1, GAP43, EXOC1, ZCCHC14, SDCBP, PASK, PLEKHA3, PITPNC1, ZFYVE1, ASAP1, PLCZ1, CCDC88A, ZFYVE28, FCHSD2, KIF16B, OSBPL5, WDFY3                                                                                                                                                                                                                                                                                                                                                                                                    |
| GO:0008324 | cation transmembrane transporter activity | 0.005446281502606583  | UNC80, CACNA2D3, SLC17A1, SLC24A2, KCNH5, PIEZO2, ITPR2, SLC44A5, KCNMA1, CHRNA7, ANO6, CACNG2, SLC4A10, OCA2, GRIK3, ATP2B2, TUSC3, GRIA1, SLC39A12, SLC8A3, TMEM38B, SLC24A3, SLC44A1, TRPM1, SLC39A11, SLC7A2, CACNA1C, CACNB2, TMC1, SLC8A1, KCNE4, KCNK10, TRPC5, RYR3, KCNJ1, TRPC7, SLC45A4, NIPAL2, LRRC38, GRIK4, KCNS3, SLC24A4, SCN2A, RYR2, SLC9C1, SLC36A1, SLC1A1, SLC12A8, KCNH1, ABCC9, P2RX6, ATP8A1, OPRM1, CNM4, SLC2A13, KCND2, NIPA2, ATP6V1E1, CACNA1I, KCNJ15, SCN11A, SLC23A2, SLC39A6, KCNH8, SLC9A4, GRIK2, SLC30A10, GRIN2A, TRPM6, SLC12A1, KCNQ3, SLC4A4, SCN10A, KCND3, KCNN3, SLC44A2, SLC15A2, SLC13A5, CUL5, COX5A, ZDHHC17, KCNC1, HCN1, GRIN2B, KCNK5, SLC40A1, SLC5A12, COX7A2L, SLC1A7, TRPV5, ABCC8, CACNA1E, ATP2B1, OTOF1, SLC6A1, SHROOM2, SLC6A11, KCNJ18, ATP13A3, SLC5A9, ATP6V1C2, SLC10A6, ATP6V1B2, TRPM7, GRIK1, SLC9A5, SLC5A1, ANO10, SCN8A, TMEM63C, NC |

|            |                                 |                      |                                                                                                                                                                                                                                                                                                                                                                                                                                                                                                                                                                                                                                                                                                                                                                                                                                                                                                                                                                                                                                                                                                                                                                                                                                                                                                                                                                                                                                                                                                                                                                                                                                                                                                                                                                                                                                                                                                                                                                                                                                                                                                                                                                                                                                                                                                                                                                                                                                                                                                                                                                                                                     |
|------------|---------------------------------|----------------------|---------------------------------------------------------------------------------------------------------------------------------------------------------------------------------------------------------------------------------------------------------------------------------------------------------------------------------------------------------------------------------------------------------------------------------------------------------------------------------------------------------------------------------------------------------------------------------------------------------------------------------------------------------------------------------------------------------------------------------------------------------------------------------------------------------------------------------------------------------------------------------------------------------------------------------------------------------------------------------------------------------------------------------------------------------------------------------------------------------------------------------------------------------------------------------------------------------------------------------------------------------------------------------------------------------------------------------------------------------------------------------------------------------------------------------------------------------------------------------------------------------------------------------------------------------------------------------------------------------------------------------------------------------------------------------------------------------------------------------------------------------------------------------------------------------------------------------------------------------------------------------------------------------------------------------------------------------------------------------------------------------------------------------------------------------------------------------------------------------------------------------------------------------------------------------------------------------------------------------------------------------------------------------------------------------------------------------------------------------------------------------------------------------------------------------------------------------------------------------------------------------------------------------------------------------------------------------------------------------------------|
|            |                                 |                      | <i>S1, ATP5PF, NALCN, TRPM3, SLC39A8, SLC16A9, KCNJ6, ATP6V0D2, CACNG3, SLC1A2, KCNIP4, SLC6A3, ASIC2, KCNQ5, CACNA2D1, SLC25A18, GRIA4, CATSPER2, CLCN5, SLC13A4, KCNAB1</i>                                                                                                                                                                                                                                                                                                                                                                                                                                                                                                                                                                                                                                                                                                                                                                                                                                                                                                                                                                                                                                                                                                                                                                                                                                                                                                                                                                                                                                                                                                                                                                                                                                                                                                                                                                                                                                                                                                                                                                                                                                                                                                                                                                                                                                                                                                                                                                                                                                       |
| GO:0019899 | enzyme binding                  | 0.008361968679786093 | <i>NOTCH2, BCAR3, WWC1, NLK, LONP2, KSR1, PLCB1, MICAL3, PDE4D, RDX, STXBP1, ERC1, RALA, BCL2, MYO5A, RIMS1, CNTLN, FGD4, SPRED1, CEP192, RIMS2, PJA2, ERCC6L2, HACD2, HLCS, RIN2, CNTNAP2, APC, DSCAM, CRKL, PTPRJ, KDM4C, EGFR, DENND1A, ANGPT1, CDK12, PRKACB, NCOR1, DOCK2, DIAPH3, NEDD4, BCL11A, FAM83F, RPRD1A, PHACTR1, DGKI, TOM1L2, NELL2, PAK1, RANBP17, UBE2L3, LDB2, SMYD3, HERC2, RPTOR, GHR, PPP1R12B, ADAM10, HDAC9, UBE2G1, IL1R1, APP, STAU2, MAPRE2, VCL, ARHGAP44, AURKA, PARN, PTPRR, AKAP6, PAK3, RANBP2, TRPC5, DNMT3, PRKCZ, SPOP, MSH6, CNST, DUSP22, WDR70, SHC4, MAPK1, RABGAP1L, USP25, KMT2E, PLG, NRG3, ANKFY1, NIPBL, IPO11, CARD18, STK38, KANSL1, PAFAH1B1, ATF6, CNKSR2, PPARA, PPP6R3, TIAM1, UBE3D, PTPRK, PLA2R1, AGO2, ANK2, BCAS3, RYR2, NBEA, DUSP16, SMARCA4, LDB3, MAPKAP1, PIAS1, DOCK4, PTPRT, ABL1, HDAC4, KCNH1, DROSHA, DMXL2, RAP1A, ZNHIT6, NRG1, AP3B1, SYNE1, ZNF675, PRKCE, USP33, SPRED2, RPS6KA3, MTMR3, PTPN2, TRIM5, ATXN3, ARHGEF7, AMBRA1, PRMT8, RPRD1B, MSH2, SH3KBP1, SLC2A13, CDKN2C, TNPO3, MYOM2, CCND3, DOCK5, MBP, PLCE1, PRR5L, ATP6V1E1, SNX3, PDLIM5, BRCA2, ADCY10, PSG8, STRN, PHACTR3, ATP9A, PSG9, CDC42BPB, EVI5, VRK1, SGSM1, RANBP9, RESF1, MYRIP, RIN3, HMB1, NFATC2, MYOM1, TRAF3, UNC13B, DOCK1, RAP1GAP, SRGAP2, NIN, CCDC186, FAM83B, GLI3, CUL1, ZFYVE26, FARP1, MOB1B, ATF2, CYLD, MAPK8IP1, PSG6, CFTR, CSE1L, NELL1, TBC1D13, RB1CC1, PRKN, SH3PXD2A, LYST, PRKCH, IL6R, ALS2, RACGAP1, TSPAN33, LRBA, USP7, RALB, ROCK1, LYN, SUMO3, KIF11, DTX1, ZFHX3, FANCL, RRAGD, RNF152, CUL5, DMBT1, NEK6, SUMO2, PDE4DIP, BID, SIAH2, RPH3A, UTRN, SNX9, BCL2L1, SERPINB9, SCAF4, ASB4, GRB14, SMAD5, TCERG1, DCUN1D4, CABYR, PSAP, MICALL2, ROR2, BANK1, SFPQ, PACRG, IQGAP1, CAMLG, ANP32B, YBX3, AIMP1, SNAP91, CD70, CACYBP, ALKAL2, JAK2, SGO1, PCNA, SIAH3, UFL1, NFKBIA, PRKCB, RFC2, RTRAF, BRD4, NEDD9, CTNBNB1, MAST2, ERLIN2, AGO1, STAT1, BRMS1L, NR2C1, MAP2K6, MARCHF6, CCBE1, PARK7, MAPK8, PPME1, UBE2J2, ADCYAP1R1, RAPGEF4, MYOCD, CYFIP2, MEF2C, RXRA, MAP3K5, PKN2, SFI1, DBF4B, WWOX, NCK1, SCAF8, FGR, RNF8, EPHA4, DNMT3L, NTRK2, AKAP11, PRKAB1, PTK2, CDH5, DIAPH1, CYFIP1, AMFR, NOS1AP, CCDC88A, BICD1, FYN, XPO7, HDAC2, SLF1, DOCK3, CDH2, RAD9A, GRM5, SPOPL, NRP1, PRKCA, FHIT, ITGA1, PCCA, RNF138, NRIP1, POR, TCERG1L, ELP2, MACROH2A1, CHCHD3, MYO5B, MET, DLG2, MAGI2, MFHAS1, TTC28, GAPVD1, RNF217, NUDT21, EXOC4, NDRG1, SLC6A3, FRMD5, ESR1, MYO9B, PRLR, HTT, FER, PITPNM3, A2M, EPS8, ROCK2, PRDM1, PPP1CB, NCOA6, WASHC1, BARD1, HNRNPU, RAB3GAP2, CADPS, PRKAG2, THRB, AKAP13, DNMT1L</i> |
| GO:0019904 | protein domain specific binding | 0.009866126708524941 | <i>NLK, DLC1, STXBP1, ERC1, BCL2, CNTLN, SPON1, DENND1A, NEDD4, ATP2B2, RABEP1, GRIA1, KHDRBS2, RAPGEF2, LRP2, RUNX2, LDB2, GRM7, GHR, ADAM10, APP, CD2AP, RAB8B, PAK3, SNTG2, RAB27B, MRTFA, SHC4, PLG, NIPBL, CARD18, FMN1, PPARA, SYNJ1, ENAH, USP8, EBF1, CXADR, DOCK4, ATRX, ABL1, PTPN12, SDC2, INPP5A, GRID2, ZBTB16, ESRRG, RFC1, ZFYVE9, OPRM1, SH3KBP1, LUC7L, ADAM12, HMGA2, TRPS1, CRIM1, RUFY2, TJP1, STRN, SH3BP5, ZNF106, ETS2, DOCK1, SLAMF1, GABRR2, KIF21A, ATF2, CFTR, CHAF1A, REPS1, PRKN, AFAP1, TFDP1, SHISA9, SHANK2, MYO1D, LYN, ARHGAP31, DTX1, INSR, XRCC4, HOXC4, CARD10, BCL2L1, SYNJ2, CABYR, MED1, ZNF521, VASP, ETV6, IQGAP1, CACYBP, CADM1, TWIST1, JAK2, ALX4, ZBTB21, ATP2B1, NDFIP2, ABI1, HNRNPM, ADGRB1, RXRA, MAP3K5, NDFIP1, PDE2A, NCK1, TOP1, GNG12, EPHA4, OCLN, SHISA6, PTK2, MPP7, SCAMP1, ICA1, CCDC88A, FYN, SNTB1, DOCK3, FUT8, RAD9A, PLEKHA2, ELMO1, CACNG3, TRIM9, ZMYND8, DD X6, EXOC4, ROBO1, NLGN1, CTNBP2, TCF12, RAB27A, EHMT1, KCNAB1</i>                                                                                                                                                                                                                                                                                                                                                                                                                                                                                                                                                                                                                                                                                                                                                                                                                                                                                                                                                                                                                                                                                                                                                                                                                                                                                                                                                                                                                                                                                                                                                                                                                   |
| GO:0005001 | transmembrane                   | 0.012069061837       | <i>PTPRD, PTPRA, PTPRN2, PTPRR, PTPRK, PTPRT, PTPRO, PTPRE, PTPRB, PTPRG</i>                                                                                                                                                                                                                                                                                                                                                                                                                                                                                                                                                                                                                                                                                                                                                                                                                                                                                                                                                                                                                                                                                                                                                                                                                                                                                                                                                                                                                                                                                                                                                                                                                                                                                                                                                                                                                                                                                                                                                                                                                                                                                                                                                                                                                                                                                                                                                                                                                                                                                                                                        |

|            |                                                     |                      |                                                                                                                                                                                                                                                                                                                                                                                                                                                                                                                                                                                                                                                                                                                                                                                                                                                                                                                                                                                                                                                                                                                                                                                                                                                                                                                                           |
|------------|-----------------------------------------------------|----------------------|-------------------------------------------------------------------------------------------------------------------------------------------------------------------------------------------------------------------------------------------------------------------------------------------------------------------------------------------------------------------------------------------------------------------------------------------------------------------------------------------------------------------------------------------------------------------------------------------------------------------------------------------------------------------------------------------------------------------------------------------------------------------------------------------------------------------------------------------------------------------------------------------------------------------------------------------------------------------------------------------------------------------------------------------------------------------------------------------------------------------------------------------------------------------------------------------------------------------------------------------------------------------------------------------------------------------------------------------|
|            | receptor protein tyrosine phosphatase activity      | 718154               |                                                                                                                                                                                                                                                                                                                                                                                                                                                                                                                                                                                                                                                                                                                                                                                                                                                                                                                                                                                                                                                                                                                                                                                                                                                                                                                                           |
| GO:0019198 | transmembrane receptor protein phosphatase activity | 0.012069061837718154 | <i>PTPRD, PTPRA, PTPRN2, PTPRR, PTPRK, PTPRT, PTPRO, PTPRE, PTPRB, PTPRG</i>                                                                                                                                                                                                                                                                                                                                                                                                                                                                                                                                                                                                                                                                                                                                                                                                                                                                                                                                                                                                                                                                                                                                                                                                                                                              |
| GO:0008013 | beta-catenin binding                                | 0.012754743283072537 | <i>APC, TCF4, PTPRJ, CTNNA3, VCL, CD2AP, KANK1, CTNNA2, CTNNA1, PTPRK, CXADR, PTPRT, CTNND2, TJP1, GLI3, PRKN, SOX30, CDH26, AJAP1, GRIP1, SHROOM2, MED12L, NUMB, CDH5, CDH2, DLG5, ESR1, RORA</i>                                                                                                                                                                                                                                                                                                                                                                                                                                                                                                                                                                                                                                                                                                                                                                                                                                                                                                                                                                                                                                                                                                                                        |
| GO:0015075 | ion transmembrane transporter activity              | 0.01277379943724249  | <i>UNC80, CACNA2D3, SLC17A1, SLC24A2, KCNH5, SLC25A21, SLC37A1, PIEZO2, ITPR2, SLC44A5, KCNMA1, CHRNA7, GABRB3, ANO6, ACNG2, SLC4A10, OCA2, GRIK3, ATP2B2, TUSC3, GABRB1, GRIA1, SLC39A12, SLC8A3, GABRA6, TMEM38B, SLC24A3, SLC44A1, TRPM1, SLC39A11, SLC7A2, CACNA1C, CACNB2, GABRG2, TMC1, SLC8A1, KCNE4, KCNK10, TRPC5, CLIC6, RYR3, KCNJ1, TRPC7, SLC45A4, SLC16A1, NIPAL2, LRRC38, GRIK4, KCNS3, GABRG1, SLC24A4, SCN2A, RYR2, SLC9C1, SLC36A1, SLC1A1, SLC12A8, KCNH1, ANO4, GRID2, SLC03A1, ABCC9, P2RX6, SLC2A3, ATP8A1, OPRM1, ABCC4, CNM4, SLC2A13, KCND2, NIPA2, TMC7, ATP6V1E1, CACNA1I, KCNJ15, SCN11A, SLC23A2, SLC39A6, KCNH8, SLC37A2, SLC9A4, GABRR2, GRIK2, LRRC8B, CFTR, SLC30A10, GRIN2A, TRPM6, SLC12A1, KCNQ3, SLC4A4, SCN10A, KCND3, KCNN3, SLC44A2, SLC15A2, SLC13A5, CUL5, GRID1, SLC52A1, COX5A, GABRG3, ZDHHC17, SLC22A14, KCNC1, HCN1, GRIN2B, KCNK5, SLC40A1, SLC5A12, COX7A2L, LASP1, SLC1A7, TRPV5, ABCC8, CACNA1E, ATP2B1, CLCA4, OTOP1, SLC6A1, SHROOM2, SLC6A11, KCNJ18, ATP13A3, SLC5A9, ATP6V1C2, SLC10A6, ATP6V1B2, GABRA5, TRPM7, GRIK1, APOL1, SLC26A2, SLC9A5, SLC27A6, SLC5A1, ANO10, SCN8A, TMEM63C, NCS1, ATP5PF, NALCN, TRPM3, SLC39A8, SLC16A9, KCNJ6, ATP6V0D2, ACNG3, SLC1A2, GABRA2, KCNIP4, SLC6A3, ASIC2, KCNQ5, CACNA2D1, SLC25A18, ANO2, GRIA4, CATSPER2, CLCN5, SLC13A4, KCNAB1</i> |
| GO:0017124 | SH3 domain binding                                  | 0.013778847673907614 | <i>DENND1A, KHDRBS2, LRP2, ADAM10, CD2AP, PAK3, FMN1, SYNJ1, ENAH, USP8, DOCK4, ABL1, PTPN12, SH3KBP1, ADAM12, RUFY2, SH3BP5, ZNF106, DOCK1, REPS1, PRKN, AFAP1, SHANK2, LYN, ARHGAP31, DTX1, SYNJ2, CABYR, VASP, ABI1, DOCK3, FUT8, RAD9A, ELMO1, CTTNBP2</i>                                                                                                                                                                                                                                                                                                                                                                                                                                                                                                                                                                                                                                                                                                                                                                                                                                                                                                                                                                                                                                                                            |
| GO:0003774 | cytoskeletal motor activity                         | 0.01612403247762649  | <i>MYO9A, MYO5A, MYO1E, MYO3B, MYO5C, DNAH6, KIF4A, DNAH14, DNAH11, DNAH5, MYO10, DNAH8, KIF21A, KIF15, MYO3A, MYO1D, KIF11, KIF21B, KIFC1, CENPE, KIF6, MYO18B, MYH13, DNAH10, KIF16B, MYO5B, DNAH3, DNAH17, MYH15, KIF13A, DNAH9, MYO9B, KIF7</i>                                                                                                                                                                                                                                                                                                                                                                                                                                                                                                                                                                                                                                                                                                                                                                                                                                                                                                                                                                                                                                                                                       |
| GO:0004713 | protein tyrosine kinase activity                    | 0.022924847299007296 | <i>ALK, MAP3K9, EGFR, NTRK3, FLT1, EPHA7, EFEMP1, MELK, BLK, ABL1, PEAK1, MUSK, EPHA6, HIPK3, CRIM1, DSTYK, LYN, CHKA, INSR, ROR2, HIPK1, JAK2, MAP2K6, FGR, EPHA4, NTRK2, PTK2, FYN, ROR1, EPHB1, RPS6KA5, NRP1, BCR, EPHB2, MET, ABL2, ERBB4, FER, IGF1R</i>                                                                                                                                                                                                                                                                                                                                                                                                                                                                                                                                                                                                                                                                                                                                                                                                                                                                                                                                                                                                                                                                            |
| GO:0008017 | microtubule binding                                 | 0.02351079469108689  | <i>MX2, RP1, DCDC1, MAP4, APC, MACF1, DIAPH3, KIF4A, MTUS1, DCLK1, MAPRE2, CCSER2, MAP4K4, FMN2, DNM3, MTUS2, FMN1, PAFAH1B1, NAV3, DST, GAS2, CLIP1, PEX14, C10ORF90, VPS41, TUBGCP3, MDM1, NIN, HAUS6, KIF21A, KIF15, MAP2, MX1, CEP44, RACGAP1, KIF11, DPYSL5, HDGFL3, KIF21B, SKA1, MAP6, KIFC1, CENPE, KIF6, MTCL1, EML1, MAST2, MARK4, DIAPH1, SAXO1, CCDC88A, SPAG6, KIF16B, TOGARAM1, NDRG1, GAS2L1, KIF13A, CEP57L1, IRAG2, EML6, HOOK3, KIF7, DNM1L</i>                                                                                                                                                                                                                                                                                                                                                                                                                                                                                                                                                                                                                                                                                                                                                                                                                                                                         |
| GO:0008237 | metallopeptidase activity                           | 0.02393772072991509  | <i>AGBL1, ENPEP, PAPP2, CPA6, ADAMTS6, ADAMTSL1, ADAM32, ADAM10, ADAMTS17, ADAM22, PAPP2, TLL1, ERMP1, ADAMTS3, CPE, ADAMTS14, METAP1D, LNPEP, ADAMTS2, CPXM2, AFG3L2, ADAM12, FOLH1, ECE1, XPNPEP1, IDE, PEPD, AOPEP, MMP16, ADAMTS19, TRAB</i>                                                                                                                                                                                                                                                                                                                                                                                                                                                                                                                                                                                                                                                                                                                                                                                                                                                                                                                                                                                                                                                                                          |

|            |                                        |                        |                                                                                                                                                                                                                                                                                                                                                                                                                                                                                                                                                                                                                                                                                                                                                                                                                                                                                                                                                                                                                                                                                                                                                                                                                                                                                                                                                                                                                                                                                                                                                                                                                                                                                                                                                                                                                                                                                                                                                                                                                                                                                                                                 |
|------------|----------------------------------------|------------------------|---------------------------------------------------------------------------------------------------------------------------------------------------------------------------------------------------------------------------------------------------------------------------------------------------------------------------------------------------------------------------------------------------------------------------------------------------------------------------------------------------------------------------------------------------------------------------------------------------------------------------------------------------------------------------------------------------------------------------------------------------------------------------------------------------------------------------------------------------------------------------------------------------------------------------------------------------------------------------------------------------------------------------------------------------------------------------------------------------------------------------------------------------------------------------------------------------------------------------------------------------------------------------------------------------------------------------------------------------------------------------------------------------------------------------------------------------------------------------------------------------------------------------------------------------------------------------------------------------------------------------------------------------------------------------------------------------------------------------------------------------------------------------------------------------------------------------------------------------------------------------------------------------------------------------------------------------------------------------------------------------------------------------------------------------------------------------------------------------------------------------------|
|            |                                        |                        | <i>D2B,MBTPS2,ADAM28,PRSS2,ADAMTS5,MIPEP,CLCA4,CNDP2,ADAMTS18,EIF3F,ADAMTS9,ADAMTS16,DNPEP,ADAM29,CPQ,MMP26,TRHDE</i>                                                                                                                                                                                                                                                                                                                                                                                                                                                                                                                                                                                                                                                                                                                                                                                                                                                                                                                                                                                                                                                                                                                                                                                                                                                                                                                                                                                                                                                                                                                                                                                                                                                                                                                                                                                                                                                                                                                                                                                                           |
| GO:0045499 | chemorepellent activity                | 0.032203382347647136   | <i>EPHA7,SEMA5A,NRG3,SEMA3C,SEMA6D,NRG1,SEMA3E,SEMA3A,SEMA3D,SEMA4D,FLRT2,EFNA5,SEMA4B</i>                                                                                                                                                                                                                                                                                                                                                                                                                                                                                                                                                                                                                                                                                                                                                                                                                                                                                                                                                                                                                                                                                                                                                                                                                                                                                                                                                                                                                                                                                                                                                                                                                                                                                                                                                                                                                                                                                                                                                                                                                                      |
| GO:0016917 | GABA receptor activity                 | 0.03514243867570173    | <i>GABRB3,GABRB1,GABRA6,GABRG2,GABRG1,GABRR2,GABBR2,GABRG3,GPR156,GABRA5,GABRA2</i>                                                                                                                                                                                                                                                                                                                                                                                                                                                                                                                                                                                                                                                                                                                                                                                                                                                                                                                                                                                                                                                                                                                                                                                                                                                                                                                                                                                                                                                                                                                                                                                                                                                                                                                                                                                                                                                                                                                                                                                                                                             |
| GO:0005261 | cation channel activity                | 0.0399206720204274     | <i>UNC80,CACNA2D3,SLC24A2,KCNH5,PIEZO2,ITPR2,KCNMA1,CHRNA7,ANO6,CACNG2,GRIK3,GRIA1,TMEM38B,SLC24A3,TRPM1,CACNA1C,CACNB2,TMC1,KCNE4,KCNK10,TRPC5,RYR3,KCNJ1,TRPC7,LRRRC38,GRIK4,KCNS3,SLC24A4,SCN2A,RYR2,KCNH1,ABCC9,P2RX6,OPRM1,KCND2,CACNA1I,KCNJ15,SCN11A,KCNH8,GRIK2,GRIN2A,TRPM6,KCNQ3,SCN10A,KCND3,KCNN3,CUL5,KNC1,HCN1,GRIN2B,KCNK5,TRPV5,ABCC8,CACNA1E,OTOP1,SHROOM2,KCNJ18,TRPM7,GRIK1,ANO10,SCN8A,TMEM63C,NCS1,ATP5PF,NALCN,TRPM3,KCNJ6,CACNG3,KCNIP4,ASIC2,KCNQ5,CACNA2D1,GRIA4,CATSPER2,KCNAB1</i>                                                                                                                                                                                                                                                                                                                                                                                                                                                                                                                                                                                                                                                                                                                                                                                                                                                                                                                                                                                                                                                                                                                                                                                                                                                                                                                                                                                                                                                                                                                                                                                                                   |
| GO:0004970 | ionotropic glutamate receptor activity | 0.043889434261199387   | <i>GRIK3,GRIA1,GRIK4,GRID2,GRIK2,GRIN2A,GRID1,GRIN2B,GRIK1,GRIA4</i>                                                                                                                                                                                                                                                                                                                                                                                                                                                                                                                                                                                                                                                                                                                                                                                                                                                                                                                                                                                                                                                                                                                                                                                                                                                                                                                                                                                                                                                                                                                                                                                                                                                                                                                                                                                                                                                                                                                                                                                                                                                            |
| <b>BP</b>  |                                        |                        |                                                                                                                                                                                                                                                                                                                                                                                                                                                                                                                                                                                                                                                                                                                                                                                                                                                                                                                                                                                                                                                                                                                                                                                                                                                                                                                                                                                                                                                                                                                                                                                                                                                                                                                                                                                                                                                                                                                                                                                                                                                                                                                                 |
| GO:0050794 | regulation of cellular process         | 4.0433960957366594e-38 | <i>NOTCH2,BCAR3,BRINP3,MTOR,CNTN4,CACNA2D3,SPOCK1,NSG1,SGCD,WWC1,ABCA13,GARNL3,LRP12,PTPRD,SLC24A2,TRAPPC9,BNC2,LRRRC4C,KCNH5,ANKS1B,SMOC1,MYO9A,ULK2,NLK,LONP2,UNC13C,FTO,KSRI,MGA,RFX7,ZNF236,PLCB1,ZNF536,MX2,TAF4A5,SVIL,CLTCL1,ZFPM2,TENM4,L3MBTL4,DLC1,TNRC6B,DPP10,ZDHC21,PTPRA,ITPR2,RIPOR2,PDE4D,RDX,RP1,STXBP1,ERC1,RALA,IL1RAPL2,BCL2,ODAD2,KCNMA1,PRDM16,ALDH1A2,ARHGAP26,FBN1,LRFN2,CDH8,CHRNA7,DCDC1,GPR158,ROBO2,RIMS1,PIK3C3,EPC2,SPIRE1,TENM3,GABRB3,ZEB1,AKR1C3,SDCCAG8,RARB,FGD4,SPRED1,ENPEP,MYO1E,PLPPR1,USH2A,MINAR1,CDC42EP3,RIMS2,ALK,AUTS2,ADGRE1,FOXJ2,CDYL2,CARMIL1,MCTP1,PJA2,BABAM2,PAPPA2,GLIS3,FANK1,ERBIN,RHPN2,RIN2,ANO6,CACNG2,DLGAP1,NEGR1,ZNF880,MLLT3,EGLN3,GPC6,CNTNAP2,MAP4,MAP3K9,SPON1,APC,ZNF595,HHLA2,TSHZ3,RBFOX3,PLPPR5,DSCAM,RTN1,TCF4,CRKL,ILDR2,SOX5,SETD2,ERG,ARHGAP24,ZNF573,TNFK,SLC4A10,PTPRJ,KDM4C,NEK4,DOCK10,TSHZ2,EGFR,ZNF280B,RFX3,DENND1A,USP14,ANGPT1,CDK12,BACH1,MACF1,CTNNA3,PRKACB,NEK7,RGS3,NCOR1,RNF220,DOCK2,ZNF407,NEDD4,MAML2,MTRF1,SND1,SCAI,NSMCE2,BTBD9,BCL11A,SOX6,FAM83F,TMEM182,SGMS1,GRIK3,CHSY1,FLI1,RPRD1A,CDH4,NTRK3,RXFP1,C5,PDE1C,ZFAND6,PHACTR1,DKK2,FLT1,DNAJC13,ZNF648,RFC3,RABEP1,ZNF382,TASP1,THRAP3,MAPKBP1,GABRB1,PSMA8,DGKI,INVS,C12ORF4,EDAR,GRIA1,CRACD,CAST,NUP214,NEO1,CNTN6,SLC39A12,CABLES1,SLC8A3,MALRD1,TOM1L2,PRKD1,TPTE2,PAK1,GMDS,EPHA7,CTNNAL1,NCOA7,KHDRBS2,CHRM3,RALGPS1,SPEN,RAPGEF2,PELI2,LRP2,ADGRB3,RUNX2,ARSB,FGF12,GABRA6,TAOK3,ONECUT1,CPEB4,TMEM38B,PRICKLE2,UBE2L3,LDB2,TAFA4,BTBD11,PUM3,CCL28,SMYD3,PATJ,GRM7,SEPTIN9,RETREG1,RPTOR,TMEM117,GHR,EPB41L3,THADA,COL4A2,SSBP3,RALGAP1,CELF2,RAPGEF5,TBCD,NEDD4L,PPP1R12B,TRPM1,ADAM10,HDAC9,ZHX3,ATF7IP,IL1R1,APBB2,APP,RPS6KA2,SAMSN1,CACNA1C,KDM1B,CACNB2,KLHL13,MTUS1,DCLK1,STAU2,GABRG2,DOCK8,TMC1,MAPRE2,ZNF600,USP18,SEMA5A,SYT1,VCL,ARHGAP44,NTF3,ACER2,PARP15,NDUFAF2,CD2AP,ZNF723,AURKA,PARN,CFDP1,ST18,PYGO1,SLC8A1,HERPUD2,SSBP2,PTPRR,SRGAP2C,ANKRD31,FIG4,DUX4,TAF4A,ABCG8,SRGAP2B,KANK1,KCNE4,MAP4K4,HIVEP2,ABCD2,BMPR1B,FMN2,PCSK6,AKAP6,HOMER2,ZNF717,CTNNA2,ARNT,RAB8B,PAK3,RFTN1,PDE1A,ZNF257,DIP2B,KCNK10,RANBP2,LARP1,ITPKB,TRPC5,RGS20,PD</i> |

|  |  |  |                                                                                                                                                                                                                                                                                                                                                                                                                                                                                                                                                                                                                                                                                                                                                                                                                                                                                                                                                                                                                                                                                                                                                                                                                                                                                                                                                                                                                                                                                                                                                                                                                                                                                                                                                                                                                                                                                                                                                                                                                                                                                                                                                                                                                                                                                                                                                                                                                                                                                                                                                                                                                                                                                                                                                                                                                                                                                                                                                                                                                                                                                                                                                                                                                                                                                                                                                                                                                                                                                                                                                                                                                                                                                                                                                                                                                                                                                       |
|--|--|--|---------------------------------------------------------------------------------------------------------------------------------------------------------------------------------------------------------------------------------------------------------------------------------------------------------------------------------------------------------------------------------------------------------------------------------------------------------------------------------------------------------------------------------------------------------------------------------------------------------------------------------------------------------------------------------------------------------------------------------------------------------------------------------------------------------------------------------------------------------------------------------------------------------------------------------------------------------------------------------------------------------------------------------------------------------------------------------------------------------------------------------------------------------------------------------------------------------------------------------------------------------------------------------------------------------------------------------------------------------------------------------------------------------------------------------------------------------------------------------------------------------------------------------------------------------------------------------------------------------------------------------------------------------------------------------------------------------------------------------------------------------------------------------------------------------------------------------------------------------------------------------------------------------------------------------------------------------------------------------------------------------------------------------------------------------------------------------------------------------------------------------------------------------------------------------------------------------------------------------------------------------------------------------------------------------------------------------------------------------------------------------------------------------------------------------------------------------------------------------------------------------------------------------------------------------------------------------------------------------------------------------------------------------------------------------------------------------------------------------------------------------------------------------------------------------------------------------------------------------------------------------------------------------------------------------------------------------------------------------------------------------------------------------------------------------------------------------------------------------------------------------------------------------------------------------------------------------------------------------------------------------------------------------------------------------------------------------------------------------------------------------------------------------------------------------------------------------------------------------------------------------------------------------------------------------------------------------------------------------------------------------------------------------------------------------------------------------------------------------------------------------------------------------------------------------------------------------------------------------------------------------------|
|  |  |  | <p> E10A,UBE2E2,RAP1GDS1,HHAT,CLIC6,KICS2,ERC2,DNM3,NBN<br/> ,SCP2,SYN3,IFT57,INTS7,PRKCZ,BTLA,GRB10,RYR3,TAF15,<br/> MSH6,MCPH1,ARHGAP32,RAB27B,CNST,RGS9,HECW1,DEFA3,MB<br/> NL2,ABCA5,PHF19,MRTFA,TAF4B,COBL,SENP6,DUSP22,EBF2,<br/> YAP1,NFIA,WDR70,PPM1L,RIPK4,ZKSCAN5,SHC4,BRINP1,MAP<br/> K1,MGAT5,CADPS2,KCNJ1,HRH2,RABGAP1L,ADAM22,USP25,KM<br/> T2E,ALCAM,PLG,PCGF5,PDGFD,SYT10,ZNRF3,PPP1R1C,ITGBL<br/> 1,ARHGEF17,NRG3,UBE20,SFMBT2,ANKFY1,NCAM1,GFRA1,SYC<br/> P1,NIPBL,SLC16A1,SPIDR,EWSR1,GABPA,FAT3,MICU1,ZNF73<br/> 5,CORO2B,CARD18,CHD6,STK38,PTPN13,CHN1,HRH4,SORCS3,<br/> MYLK3,KANSL1,GLP2R,LIMCH1,FMN1,MBNL1,PAFAH1B1,ATF6,<br/> EFEMP1,ZNF684,TM7SF3,DCAF1,ITGB8,STON2,VPS13D,CCNG2<br/> ,TLK1,TPM1,NF2,LRRC38,CNKSR2,GRIK4,RBFOX1,HIVEP1,CT<br/> NNA1,PPP1R9A,MOB3B,BIRC6,AKAP9,KLF15,RASGRF2,PPARA,<br/> MEIS2,SNX30,NFIB,KCNS3,ERMP1,MRTFB,PPP6R3,PRTG,RGL1<br/> ,SYNJ1,NR5A2,ADAMTS3,TIAM1,ARAP2,GRM1,FOXJ3,PTPRK,A<br/> RHGEF12,GABRG1,PAK5,TRERF1,PCDH11Y,PPP2R5E,PLA2R1,E<br/> IF3D,SEMA3C,DAPK1,NAV3,SLC24A4,SEC14L1,VPS13C,TMEM1<br/> 08,AGO2,STK32B,PHC3,MAGI1,ALPK2,DNAH11,JARID2,SCN2A<br/> ,RIC8B,SORCS1,DNAJC15,GATAD2B,CPE,EVC2,DYSF,IL34,AN<br/> K2,BRWD1,TANC1,ADGRV1,ZNF846,MELK,BCAS3,RYR2,SYNE2,<br/> BBS2,WNT9B,ZNF606,RANBP3L,OR4F6,NKG7,SEMA6D,DUSP16,<br/> SMARCA4,CDH11,USP8,FABP7,PARD3,MAPKAP1,TNRC6C,PIAS1<br/> ,TBC1D5,SPG21,BLK,EBF1,TNR,GRM8,DST,CXADR,DOCK4,MBD<br/> 5,ATRX,NUAK1,PTPRT,ELAVL4,ABL1,MXI1,PTPN12,HDAC4,OX<br/> R1,SLC1A1,PRKAA1,SDC2,GAS2,KCNH1,ITGB3BP,MRPS27,LRF<br/> N5,CREG1,DROSHA,APBB1IP,L3MBTL3,EIPR1,APLF,NFAT5,MA<br/> ST4,GUCY1A2,NBAS,SLFN11,RAP1A,GLIS1,MORC1,MYO10,GPC<br/> 5,TOX3,CAMK4,BAZ2A,INPP5A,CPSF3,FGF10,ZC3HAV1,GRID2<br/> ,TGM1,PEAK1,LATS2,NRG1,INO80D,GSG1L,CLIP1,ASPM,AP3B<br/> 1,DENND2B,RASGRF1,ATP11C,ZNF438,ABC7,ZBTB16,MUSK,K<br/> IR3DL2,ZNF675,GNG7,SMARCA1,SH3GL3,SETDB2,PRKCE,FOX<br/> K2,SLCO3A1,MED15,SLMAP,NXN,WNK2,ESRRG,ZNF718,DGKB,U<br/> SP33,DENND4C,FBN2,CD44,RGS12,PTPRO,EGF,PRRC1,ABCC9,<br/> P2RX6,TRIO,PDE3A,EXT1,STXBP6,NSMAF,LNPEP,LIMD1,PEX1<br/> 4,SPRED2,RPS6KA3,CTNND2,ATP8A2,SCG5,MTMR3,PTPN2,TRI<br/> M5,PLXNA2,MCF2L,OR4F15,ATXN3,RFC1,HTR2C,RIC3,CLEC16<br/> A,ARHGEF7,ALG10B,ATP8A1,AMBRA1,LTBP1,STK38L,ZFYVE9,<br/> KDM7A,OPRM1,HTR2A,PLCXD3,FANCA,DAZL,INPP4B,GTFF2F2,K<br/> REMEN1,STAC,SEMA3E,TAF3,RPRD1B,MARK2,GCSAML,TMEM67,<br/> EBF3,ZNF33B,C10ORF90,FHL2,ABHD17C,ADGRA3,CNIH3,PUM1<br/> ,TMOD2,HERC1,MSH2,IGF2BP3,GNAL,EPHA6,ANKRD17,APBA2,<br/> LINGO2,ZNF397,SH3KBP1,SLC2A13,RELL1,HIPK3,CDKN2C,EP<br/> N2,KCND2,EVC,GRK3,KNDC1,SPSB4,CLSPN,NOS2,BTCRAL,STK<br/> 10,MOSMO,GFRA2,MNAT1,TMEM116,RBBP8,MDFIC,ADAM12,MYL<br/> K2,ANK3,EMILIN2,HMGA2,CCND3,BCL11B,VPS41,DOCK5,ECE1<br/> ,ZIM3,STK32A,CREM,LYPLA1,MBP,TRPS1,PLCE1,TGFA,IL17R<br/> A,ANKFN1,HIP1,CRIM1,FUT9,PRR5L,GSR,ATP6V1E1,UTP4,CA<br/> PN5,VAV1,RUFY2,MYT1L,ZNF160,TJP1,LDLRAD4,NPHP4,EGFL<br/> AM,PACIN2,CNTN1,HLA-<br/> B,IQSEC1,HSF5,SNX3,CACNA1I,NAA35,ZNF367,PDLIM5,KCNJ<br/> 15,BCRA2,DISC1,ZBTB2,DNER,BLM,ASB7,WDRCP,NRK,SEMA3A<br/> ,MAGI3,INTS8,LIN54,ADCY10,PSG8,STRN,OR9Q1,ZNF121,BM<br/> P2,RC3H2,UNC5D,ATP9A,TRAK1,PSG9,CDC42BPB,SOGA1,PTCD<br/> 2,SCN11A,MSR1,VRK1,GNAI1,RALGAPA2,ZC3H14,GFI1B,TBC1<br/> D4,RANBP9,RESF1,MYRIP,TTR,RIN3,BMP2K,TMEM161A,SEMA3<br/> D,ASXL3,NETO2,PDE6C,CABIN1,LEMD3,RELN,ARHGAP42,HMGB<br/> 1,GNAQ,FGF9,NFATC2,SH3BP5,UST,MDM1,SLC23A2,POLR2M,Z<br/> NF106,MYOM1,ZNF567,TRAF3,ZNF462,ANKRD26,ESRP1,UNC13<br/> B,TTC21B,ETS2,GEMIN5,ZNF875,DSTYK,UIMC1,DOCK1,LRRFI<br/> P1,RAP1GAP,PLS1,SRGAP2,IKZF2,NIN,DRAXIN,ATF1,SLAMF1<br/> ,KCNH8,SMARCA2,ETS1,FAM83B,GLI3,CGAS,SMARCC1,SNX6,A<br/> FF3,GABRR2,SMOC2,PCP4,CNKSR3,CASP5,VENTX,GRIK2,IDE,<br/> WDR12,MCTP2,KIF15,PRDM10,CUL1,MYEF2,ZFYVE26,ZNF431,<br/> RERE,PSD3,MAP2,BTAF1,GAREM1,LAMC1,ZNF618,NEK10,FARP<br/> 1,MOB1B,ATF2,HIRA,CYLD,UMODL1,BBS4,MAPK8IP1,MX1,PSG </p> |
|--|--|--|---------------------------------------------------------------------------------------------------------------------------------------------------------------------------------------------------------------------------------------------------------------------------------------------------------------------------------------------------------------------------------------------------------------------------------------------------------------------------------------------------------------------------------------------------------------------------------------------------------------------------------------------------------------------------------------------------------------------------------------------------------------------------------------------------------------------------------------------------------------------------------------------------------------------------------------------------------------------------------------------------------------------------------------------------------------------------------------------------------------------------------------------------------------------------------------------------------------------------------------------------------------------------------------------------------------------------------------------------------------------------------------------------------------------------------------------------------------------------------------------------------------------------------------------------------------------------------------------------------------------------------------------------------------------------------------------------------------------------------------------------------------------------------------------------------------------------------------------------------------------------------------------------------------------------------------------------------------------------------------------------------------------------------------------------------------------------------------------------------------------------------------------------------------------------------------------------------------------------------------------------------------------------------------------------------------------------------------------------------------------------------------------------------------------------------------------------------------------------------------------------------------------------------------------------------------------------------------------------------------------------------------------------------------------------------------------------------------------------------------------------------------------------------------------------------------------------------------------------------------------------------------------------------------------------------------------------------------------------------------------------------------------------------------------------------------------------------------------------------------------------------------------------------------------------------------------------------------------------------------------------------------------------------------------------------------------------------------------------------------------------------------------------------------------------------------------------------------------------------------------------------------------------------------------------------------------------------------------------------------------------------------------------------------------------------------------------------------------------------------------------------------------------------------------------------------------------------------------------------------------------------------|

|  |  |  |                                                                                                                                                                                                                                                                                                                                                                                                                                                                                                                                                                                                                                                                                                                                                                                                                                                                                                                                                                                                                                                                                                                                                                                                                                                                                                                                                                                                                                                                                                                                                                                                                                                                                                                                                                                                                                                                                                                                                                                                                                                                                                                                                                                                                                                                                                                                                                                                                                                                                                                                                                                                                                                                                                                                                                                                                                                                                                                                                                                                                                                                                                                                                                                                                                                                                                                                                                                                                                                                                                                                                                                                                                                                                                                                                                                                                                                                                                                                                                             |
|--|--|--|-----------------------------------------------------------------------------------------------------------------------------------------------------------------------------------------------------------------------------------------------------------------------------------------------------------------------------------------------------------------------------------------------------------------------------------------------------------------------------------------------------------------------------------------------------------------------------------------------------------------------------------------------------------------------------------------------------------------------------------------------------------------------------------------------------------------------------------------------------------------------------------------------------------------------------------------------------------------------------------------------------------------------------------------------------------------------------------------------------------------------------------------------------------------------------------------------------------------------------------------------------------------------------------------------------------------------------------------------------------------------------------------------------------------------------------------------------------------------------------------------------------------------------------------------------------------------------------------------------------------------------------------------------------------------------------------------------------------------------------------------------------------------------------------------------------------------------------------------------------------------------------------------------------------------------------------------------------------------------------------------------------------------------------------------------------------------------------------------------------------------------------------------------------------------------------------------------------------------------------------------------------------------------------------------------------------------------------------------------------------------------------------------------------------------------------------------------------------------------------------------------------------------------------------------------------------------------------------------------------------------------------------------------------------------------------------------------------------------------------------------------------------------------------------------------------------------------------------------------------------------------------------------------------------------------------------------------------------------------------------------------------------------------------------------------------------------------------------------------------------------------------------------------------------------------------------------------------------------------------------------------------------------------------------------------------------------------------------------------------------------------------------------------------------------------------------------------------------------------------------------------------------------------------------------------------------------------------------------------------------------------------------------------------------------------------------------------------------------------------------------------------------------------------------------------------------------------------------------------------------------------------------------------------------------------------------------------------------------------|
|  |  |  | <p>6, HIVEP3, COL5A1, GABBR2, PSIP1, ITGA9, CFTR, KPNA1, NELL1, ME2, UBASH3A, RGM, NEU3, MRPL13, KITLG, ZZEF1, DNAJC7, CMTA1, UBR1, DCC, MYT1, CHRM5, MAP4K3, YLPM1, SLC30A10, RCAN1, GTF2I, RORB, TADA2A, DAB1, MED27, ZNF208, SELENON, RB1CC1, NMD3, AKAP10, PTPRE, PRKN, MTMR2, ZNF608, TBX20, SP110, DLGAP2, AFAP1, MAPK10, DACH1, ZNF541, DPFF3, NGEF, GRIN2A, ARID5B, ZBED9, JPH1, TXNRD2, ATXN1, WSB1, LALBA, PRKCH, PKP1, HUNK, FRMD4A, TG, IL6R, FRMPD4, ALS2, RACGAP1, NLRC5, ZNF627, OR51E1, ACO1, TFDP1, CNOT6L, MKNK1, HEMGN, KANK4, DOCK9, SNX25, FBLN5, KCNQ3, TOX, SHISA9, SLC4A4, PTPRB, ZFP90, PDE6A, COPS8, ZNF124, SCN10A, SHANK2, ST8SIA1, USP7, VAV3, ENPP3, PLAGL1, KCND3, MESD, ITS2, SOX30, MOK, KIR2DL4, ARHGEF28, RALB, NPAS2, ADGRG6, ROCK1, LYN, VCAM1, SEL1L, ARHGAP28, ARHGAP31, ZNF780B, CTSB, EIF2B3, SLC44A2, SUMO3, SLC15A2, ZNF169, PLEKHB2, KIF11, DTX1, BZW1, TENM2, OVOL2, PIWIL3, ZBTB33, ADA2, NTN1, PLCB4, ZFH3, FANCL, DPYSL5, ZNF44, RRGD, BANP, SUPT16H, ARID1B, HOXC13, CRACR2A, RNF152, BAZ1A, CASZ1, OTUD7A, INSR, CUL5, OR7A17, BMF, YTHDF3, TFF1, DEDD2, NEK6, HECTD1, GRID1, COLQ, NMU, DDHD1, PBX3, SUMO2, HS1BP3, ZNF292, ARFGEF1, PDE4DIP, GAST, POGK, SNAI2, ASH1L, IGHV3</p> <p>74, HOXC4, BID, SIAH2, TANC2, ABCA4, TRABD2B, UFD1, RXRG, SP3, DRAM1, ERN2, GABRG3, ZNF879, MBTPS2, FLNB, TRIM58, TIAL1, TOM1, ELF2, PLPP4, NREP, ZDHHC17, NSD2, FYCO1, SH3GLB1, CD9, CARD10, RALGPS2, JCAD, TWIST2, OR4K2, CTIF, SAMHD1, IFT81, ENPP1, UTRN, RASGRP1, IGSF11, SNX9, TP53I11, TMEM225, ANAPC1, NDRG2, CSNK2A1, BMP5, KCNC1, CSF1, GHRH, HDGFL3, BCL2L1, SERPINB9, SCAF4, CTDP1, HCN1, PRKG1, LAMA3, ASB4, GRIN2B, GRB14, INO80, FANCB, GPR156, IGHV2</p> <p>70D, CLNS1A, CNMD, DHRS3, SMAD5, CELF4, TCERG1, ABCG1, OR4C46, FOXN3, KCNK5, SLC40A1, PRAME, MYCL, TNN, CIDEA, PSAP, LPGAT1, MICALL2, MED1, CDC14B, PCNT, IL33, AJAP1, GPRC5C, ROR2, CFH, ZNF521, KL, RASGEF1C, BANK1, CSDE1, LMX1A, TMEM178A, IL10, ATR2, OR1L6, SFPQ, SCML2, PRAMEF25, RIOK1, CLSTN2, PTH, SOSTDC1, PRKAA2, CSF2RB, DIRAS2, SKA1, NDC80, SOHLH1, LARP6, PACRG, PHF20L1, ABHD2, ITPRIP, VSTM2A, MAP6, VASP, PLA2G4A, ETV6, RAB12, IQGAP1, RPS12, CAMLG, COX7A2L, ZBTB7C, TEAD1, MORC2, SREBF2, ANP32B, YBX3, AIMP1, THNSL2, FYB2, NRXN1, PCID2, HIPK1, ZNF234, CISD1, ZNF518A, DGKK, SNAP91, CD70, CIBAR1, PBLD, FICD, CADM1, CENPE, PEG10, LMX1B, NET1, SIPA1L2, NGDN, ELOC, ANLN, TWIST1, AKT3, ALKAL2, JAK2, VSX1, RPF2, FSTL1, ZBTB38, ISX, SVEP1, MADD, HCTR1, PTGS1, PATL1, ZNF287, CELSR2, ZNF449, PRSS2, CREBBP, MELTF, TNKS, GORAB, PCNA, SIAH3, UFL1, NFKBIA, PRKCB, OR2T3, ABCC8, ANXA4, CACNA1E, ZC3H15, ANP32A, RFC2, ZNF354C, ALX4, RTRAF, USH1C, BRD4, ZBTB21, SERBP1, NEDD9, OLFM4, NRBP1, ITGA6, ATP2B1, GAP43, ASS1, MTCL1, GRIPI1, IGHV10R15</p> <p>9, CTNNB1, ADGRE3, SAR1A, ADCY9, PPP1R17, CNIH1, MAST2, HPSE2, BTG3, ZNF528, ERLIN2, ZNF611, OTOP1, CIDEA, ARFGEF3, ZBTB49, EXT2, EXOC1, KRT6A, STOX2, AGO1, MEOX2, SLC6A1, GID8, ELL2, STAT1, BRMS1L, NDFIP2, NR2C1, MAP2K6, CMTM7, DGKG, KCNJ18, GATAD1, MTPN, ABI1, CEMIP, PRAMEF2, POU6F2, IMPACT, CCBE1, PARK7, ADAMTS18, MAPK8, ITGA4, OAZ2, MED12L, ZSCAN30, FBXL17, POU1F1, UBE2J2, ADCYAP1R1, MTF2, NCAPG2, TM9SF4, RAPGEF4, OR6C75, FOXP2, ASB2, MYOCD, CEP120, ZSCAN5C, CYFIP2, HNRNPM, ASCC2, EFHB, OR13C9, ARID3B, MEF2C, ZNF613, ADGRB1, RXRA, WNT7A, RBPMS2, MAP3K5, NDFIP1, MAP3K4, WASF3, S100B, SERPINI2, PRDM13, FOXO6, ZNF112, ATP6V1C2, C16ORF72, MAGEL2, PKN2, RAD51AP1, OR10H2, PDE2A, RAB38, LRRC2, DBF4B, FBXW8, SDCBP, NECTIN1, JPT2, SPPL2B, NSMCE1, ZNF813, WWOX, ZBTB25, PASK, MLLT1, NCK1, SCAF8, FGR, CWC22, CDC48, PPP2R3A, DNMBP, ATP6V1B2, CXCL2, MLLT10, C2, IFNAR1, RNF8, GNG12, EPHA4, CYTH4, INTS13, GABRA5, MECOM, DNMT3L, NTRK2, IL1R1, NUMB, LHX9, ADAMTS9, WNT2B, COLEC12, ZBTB10, OCLN, POSTN, CREB5, CD101, SHISA6, MEGF10, IL17RD, FBXO31, EXTL3, AKAP11, GRIK1, PRKAB1, DTHD1, IREB2, MVB12B, PTK2, MARK4, CD</p> |
|--|--|--|-----------------------------------------------------------------------------------------------------------------------------------------------------------------------------------------------------------------------------------------------------------------------------------------------------------------------------------------------------------------------------------------------------------------------------------------------------------------------------------------------------------------------------------------------------------------------------------------------------------------------------------------------------------------------------------------------------------------------------------------------------------------------------------------------------------------------------------------------------------------------------------------------------------------------------------------------------------------------------------------------------------------------------------------------------------------------------------------------------------------------------------------------------------------------------------------------------------------------------------------------------------------------------------------------------------------------------------------------------------------------------------------------------------------------------------------------------------------------------------------------------------------------------------------------------------------------------------------------------------------------------------------------------------------------------------------------------------------------------------------------------------------------------------------------------------------------------------------------------------------------------------------------------------------------------------------------------------------------------------------------------------------------------------------------------------------------------------------------------------------------------------------------------------------------------------------------------------------------------------------------------------------------------------------------------------------------------------------------------------------------------------------------------------------------------------------------------------------------------------------------------------------------------------------------------------------------------------------------------------------------------------------------------------------------------------------------------------------------------------------------------------------------------------------------------------------------------------------------------------------------------------------------------------------------------------------------------------------------------------------------------------------------------------------------------------------------------------------------------------------------------------------------------------------------------------------------------------------------------------------------------------------------------------------------------------------------------------------------------------------------------------------------------------------------------------------------------------------------------------------------------------------------------------------------------------------------------------------------------------------------------------------------------------------------------------------------------------------------------------------------------------------------------------------------------------------------------------------------------------------------------------------------------------------------------------------------------------------------------|

|            |                                  |                        |                                                                                                                                                                                                                                                                                                                                                                                                                                                                                                                                                                                                                                                                                                                                                                                                                                                                                                                                                                                                                                                                                                                                                                                                                                                                                                                                                                                                                                                                                                                                                                                                                                                                                                                                                                                                                                                                                                                                                                                                                                                                                                                                                                                                                                                                                                                                                                                                                                                                                                                                                                                                                                                                                                                                                                                                                                            |
|------------|----------------------------------|------------------------|--------------------------------------------------------------------------------------------------------------------------------------------------------------------------------------------------------------------------------------------------------------------------------------------------------------------------------------------------------------------------------------------------------------------------------------------------------------------------------------------------------------------------------------------------------------------------------------------------------------------------------------------------------------------------------------------------------------------------------------------------------------------------------------------------------------------------------------------------------------------------------------------------------------------------------------------------------------------------------------------------------------------------------------------------------------------------------------------------------------------------------------------------------------------------------------------------------------------------------------------------------------------------------------------------------------------------------------------------------------------------------------------------------------------------------------------------------------------------------------------------------------------------------------------------------------------------------------------------------------------------------------------------------------------------------------------------------------------------------------------------------------------------------------------------------------------------------------------------------------------------------------------------------------------------------------------------------------------------------------------------------------------------------------------------------------------------------------------------------------------------------------------------------------------------------------------------------------------------------------------------------------------------------------------------------------------------------------------------------------------------------------------------------------------------------------------------------------------------------------------------------------------------------------------------------------------------------------------------------------------------------------------------------------------------------------------------------------------------------------------------------------------------------------------------------------------------------------------|
|            |                                  |                        | <p>H5, CD5L, RCAN2, ANKRD6, SCGN, NFKBID, ARHGAP12, CLDN18, ASCL3, MPP7, DIAPH1, FEZ2, INIP, LAMB1, APIP, CYFIP1, UBE3A, PCDH8, SEMA4D, JAM2, PITPNC1, FRMD6, MC2R, ZBTB20, FAT4, IMPA2, ZNF66, RUNX1, AKR1B1, KIRREL1, WNT5B, RASGEF1B, AMFR, SAXO1, NENF, POMT2, PTGFR, ZNF845, OR4L1, ASAP1, SAMD13, ICA1, PLCZ1, EDIL3, NOS1AP, FCRLA, DIDO1, TPTE, SORBS2, PDCL3, SRP9, CNKSR1, CCDC88A, GPR55, NSUN2, CHCHD2, ADAMTS16, CDC45, OR11G2, BICD1, TNFSF11, FYN, BUB1, KDM5A, PCBP3, ZNF705G, PPM1F, ADGRL2, ARL13B, SDE2, RBMS3, UHRF2, SCN8A, HDAC2, AVEN, SLF1, GON4L, TBX15, SH2D3C, DOCK3, TRNAU1AP, NCS1, COL18A1, ALB, DOK5, NALCN, ZFYVE28, MAPK9, PABPC1, CRTAM, APELA, SLC39A8, ROR1, FUT8, TET1, ARNT2, ASB3, HECW2, CDH2, ITGA8, FBXL20, RAD9A, PHLPP1, GPR137B, EPHB1, RP1L1, GRM5, ADCK1, RAI14, ZNF705D, RPS6KA5, SPTB, TBC1D1, LRRC69, PTPRG, PID1, NRP1, MIDEAS, FCHSD2, PRKCA, ATPSCKMT, FAIM, SAMD12, FHIT, ITGA1, ZNF615, KLF12, RNF138, RC3H1, NRIP1, CHODL, POR, ZNF850, ZNF235, MCC, ZNF738, SUPT3H, BCR, TUT4, NRXN3, ELMO1, RGS6, RERG, ZNF215, TCERG1L, KIF16B, PRIM2, SNRK, C14ORF39, TM9SF2, ELP2, FBLN1, STK36, NSG2, RAG1, KCNJ6, B9D1, RRAS2, GNA14, ZNF678, BMPER, PRDM15, CUX1, DPP6, SRGAP3, ZNF420, MACROH2A1, MITF, EPHB2, TSPAN13, TOGARAM1, CSNK1G1, SACS, BCL2L13, CD38, EYA4, DPH6, CDK14, AKAIN1, MET, SPPL3, CDH17, ZNF705B, ATP6V0D2, PPFIA2, CDH13, MED13L, STXBP4, SERPINB2, CACNG3, ATG5, MAGI2, PRDM11, VMP1, UNK, MLIP, FLRT2, MYB, KALRN, ZNF704, SLC1A2, GNAS, LAMA1, MFHAS1, SERPINB7, ATRNL1, TIAM2, DHX29, BMP7, TTC28, ASTN2, DLG5, TNFAIP8, ZMYND8, GAPVD1, GABRA2, RNF217, KCTD1, OR2T2, ZNF74, BPTF, BTBD10, ZMYND11, TMEM25, NUDT21, GRM3, KMT2C, DDX6, ADGRF5, OR4N2, PDGFC, WDR41, PPP1R13B, ABL2, BACE2, RFX2, PARPBP, NECAB1, PKNOX2, EYA1, FHOD3, SLIT2, EXOC4, CNOT7, KCNIP4, ESCO1, KCTD8, PLCL1, ERBB4, IL20RB, FAM3B, GSAP, TRHDE, SYNDIG1, ROBO1, SAMD4A, PBX1, IRAG1, NPAS3, NUF2, PRKCQ, ANTXR1, NDRG1, SORCS2, SIPA1L3, TRDN, MGMT, ZNF679, NLGN1, CTTNBP2, SHLD2, NOS1, SLC6A3, PRR16, ASIC2, EFNA5, TCF12, GAS2L1, ARHGEF11, RAB27A, NSD1, EHMT1, SLIT3, DTNA, KIF13A, FRMD5, ER1, MYO9B, NTNG1, KDM4B, KCNQ5, LOXL2, CACNA2D1, NYAP2, IGLC3, IQCJ-<br/>SCHIP1, ADGRG7, SKAP2, PRLR, AGO3, HTT, FOXB1, RAD51B, CAMK1D, PIK3R3, HLA-<br/>F, FER, ZNF302, EYA2, CCR2, STARD13, INTS12, CHFR, ZNF721, EPS8, JAZF1, ZNF578, ZNF891, SPOCK3, SEMA4B, NRF1, IGHV10R21-<br/>1, ZNF14, HRH1, PHC2, GRIA4, ROCK2, PRDM1, RORA, STMP1, IL16, ATAT1, DMRT1, EIF4G3, CDCA5, PPP1CB, CATSPER2, RGS8, RAB31, PDK1, CSMD3, HERPUD1, NCOA6, TRIM2, COL4A3, WASHC1, ZFP30, RGS7, HOOK3, KIF7, GNG2, FSTL4, BARD1, STK3, DEPTOR, ZNF423, C1QL3, RSU1, PNPLA8, ZNF568, HNRNPU, CEP72, RAB3GAP2, CADPS, APCDD1, IGF1R, KCNAB1, PRKAG2, GLI2, THRB, AKAP13, MORC3, ATP10A, DNMI1L</p> |
| GO:0048856 | anatomical structure development | 2.2437523791736848e-36 | <p>NOTCH2, BCAR3, BRINP3, MTOR, CNTN4, SPOCK1, SGCD, IMMP2L, LRP12, PTPRD, FREM1, TRAPPC9, BNC2, NEBL, LRRC4C, SMOC1, MYO9A, ULK2, SCAPER, FTO, PLCB1, ZNF536, TAF4A, SVIL, CLTCL1, ZFPM2, TENM4, NUBPL, DLC1, ZDHHC21, RIPOR2, PDE4D, RDX, RP1, STXBP1, RALA, IL1RAPL2, BCL2, ODAD2, ALDH1A2, ARHGAP26, FBN1, CDH8, CHRNA7, ROBO2, RIMS1, SPIRE1, TENM3, GABRB3, ZEB1, AKR1C3, SDCCAG8, RARB, FGD4, SPRED1, NAV2, ENPEP, SPAG16, MYO1E, PLPPR1, USH2A, MINAR1, CDC42EP3, RIMS2, ALK, AUTS2, FOXJ2, CARMIL1, PAPP2, ASTN1, RIN2, PARVB, ANO6, NEGR1, MLT3, GPC6, CNTNAP2, MAP4, MYO3B, APC, ZMYM4, RBFOX3, PLPPR5, DSCAM, RTN1, TCF4, CRKL, ILDR2, SOX5, SETD2, ARHGAP24, TNIK, SLC4A10, PTPRJ, OCA2, KDM4C, DOCK10, EGFR, RFX3, ANGPT1, MACF1, PRKACB, RNF220, DOCK2, NEDD4, MYOF, CRB1, BCL11A, SOX6, TMEM182, CECR2, ARMC2, CHSY1, FLI1, CDH4, ATP2B2, NTRK3, LARGE1, RXFP1, C5, PHACTR1, DKK2, FLT1, ADAMTS6, GABRB1, EDAR, NEO1, CNTN6, SLC39A12, CABLES1, SLC8A3, PRKD1, PAK1, EPHA7, CHRM3, SPEN, RAPGEF2, LRP2, ADGRB3, DEUP1, RUNX2, ARS</p>                                                                                                                                                                                                                                                                                                                                                                                                                                                                                                                                                                                                                                                                                                                                                                                                                                                                                                                                                                                                                                                                                                                                                                                                                                                                                                                                                                                                                                                                                                                                                                                                                                                                                                                                                                                      |



|  |  |  |                                                                                                                                                                                                                                                                                                                                                                                                                                                                                                                                                                                                                                                                                                                                                                                                                                                                                                                                                                                                                                                                                                                                                                                                                                                                                                                                                                                                                                                                                                                                                                                                                                                                                                                                                                                                                                                                                                                                                                                                                                                                                                                                                                                                                                                                                                                                                                                                                                                                                                                                                                                                                                                                                                                                                                                                                                                                                                                                                                                                                                                                                                                                                                                                                                                                                                                                                                                                                                                                                                                                                                                                                                                                                                                                                                                                                                                                                                                                                                                                                                                |
|--|--|--|------------------------------------------------------------------------------------------------------------------------------------------------------------------------------------------------------------------------------------------------------------------------------------------------------------------------------------------------------------------------------------------------------------------------------------------------------------------------------------------------------------------------------------------------------------------------------------------------------------------------------------------------------------------------------------------------------------------------------------------------------------------------------------------------------------------------------------------------------------------------------------------------------------------------------------------------------------------------------------------------------------------------------------------------------------------------------------------------------------------------------------------------------------------------------------------------------------------------------------------------------------------------------------------------------------------------------------------------------------------------------------------------------------------------------------------------------------------------------------------------------------------------------------------------------------------------------------------------------------------------------------------------------------------------------------------------------------------------------------------------------------------------------------------------------------------------------------------------------------------------------------------------------------------------------------------------------------------------------------------------------------------------------------------------------------------------------------------------------------------------------------------------------------------------------------------------------------------------------------------------------------------------------------------------------------------------------------------------------------------------------------------------------------------------------------------------------------------------------------------------------------------------------------------------------------------------------------------------------------------------------------------------------------------------------------------------------------------------------------------------------------------------------------------------------------------------------------------------------------------------------------------------------------------------------------------------------------------------------------------------------------------------------------------------------------------------------------------------------------------------------------------------------------------------------------------------------------------------------------------------------------------------------------------------------------------------------------------------------------------------------------------------------------------------------------------------------------------------------------------------------------------------------------------------------------------------------------------------------------------------------------------------------------------------------------------------------------------------------------------------------------------------------------------------------------------------------------------------------------------------------------------------------------------------------------------------------------------------------------------------------------------------------------------------|
|  |  |  | <p> B, FGF12, CPS1, TAOK3, ONECUT1, TMEM38B, ADAMTSL1, PRICKLE2, SLC24A3, LDB2, SMYD3, GRM7, GHR, LUZP1, EPB41L3, COL4A2, SSBP3, RAPGEF5, TBCD, NEDD4L, ADAM10, HDAC9, APP, ABCB5, RP S6KA2, CACNA1C, DCLK1, STAU2, GABRG2, TMC1, SEMA5A, SYT1, VCL, ARHGAP44, NTF3, AURKA, CFDP1, PYGO1, SLC8A1, PTPRR, SRGAP2C, FIG4, CMIP, SRGAP2B, KANK1, MAP4K4, ABCD2, BMPR1B, FMN2, THSD7A, PCSK6, AKAP6, CTNNA2, ARNT, PAK3, TTLL7, DIP2B, ITPKB, TRPC5, CHST8, DNM3, NBN, IFT57, RBM47, PRKCZ, CALD1, SNTG2, KLHL1, DIP2A, MSH6, MCPH1, COL27A1, ZSWIM6, HECW1, MRTFA, TAF4B, COBL, EBF2, YAP1, ESS2, FRYL, NFIA, RIPK4, BRINP1, MAPK1, ADAM22, CRISPLD2, KMT2E, ALCAM, PLG, PDGFD, ZNRF3, ABLIM1, NRG3, NCAM1, GFRA1, SYCP1, NIPBL, RNF17, GABPA, FAT3, LCE1F, CHN1, MYLK3, ACSBG1, FMN1, MBNL1, PAFAH1B1, ATF6, EFEMP1, TLL1, DCAF1, ITGB8, TPM1, NF2, RFXO1, CTNNA1, PP1R9A, ANKRD11, CDH7, BIRC6, KLF15, PPARA, MEIS2, NFIB, MRTFB, PRTG, SYNJ1, NR5A2, ADAMTS3, TIAM1, KAZN, ENAH, SF3B6, SEMA3C, NAV3, SLC24A4, TMEM108, AGO2, ALPK2, DNAH11, JARID2, SCN2A, CPE, DYSF, IL34, ANK2, BRWD1, TANC1, ADGRV1, MELK, BCAS3, RYR2, SYNE2, BBS2, WNT9B, RANBP3L, SEMA6D, ANKS6, SMARCA4, CDH11, LDB3, FABP7, PARD3, MAPKAP1, BLK, TNFR, COL22A1, CXADR, MBD5, ATRX, XIRP2, ELAVL4, ABL1, PTPN12, HDAC4, SLC1A1, PRKAA1, SDC2, GAS2, KCNH1, LRFN5, CRTAC1, DROSHA, TTLL5, L3MBTL3, APLF, DNAH5, CDH18, RAP1A, MYO10, CAMK4, FGF10, GRID2, CDHR3, GALT, TGM1, PEA3, LATS2, NRG1, INO80D, ASPM, AP3B1, RASGRF1, ATP11C, SYNE1, ZBTB16, MUSK, ZNF675, SH3GL3, SETDB2, PGM5, NXN, USP33, FBN2, CD44, PTPRO, EGF, ALPK3, TRIO, PDE3A, EXT1, COL5A3, LIMD1, SPRED2, ADAMTS2, RPS6KA3, CTNND2, NHS, ATP8A2, PTPN2, PLXNA2, ATXN3, STSIA6, ARHGEF7, AMBRA1, KDM7A, OPRM1, FANCA, CYP4A11, DAZL, CNM4, KREMN1, SEMA3E, MARK2, ALPL, FHL2, TMOD2, HERC1, MSH2, IGF2BP3, CDIN1, EPHA6, ANKRD17, APBA2, LINGO2, SH3KBP1, ATL1, LUC7L, CDKN2C, EPN2, EVC, KNDC1, AFG3L2, MOSMO, GFRA2, MNAT1, RBBP8, SGCZ, ADAM12, MYLK2, ANK3, EMILIN2, XYLT1, HMG2, MYOM2, BCL11B, DOCK5, ECE1, MBP, AK8, TRPS1, PLCE1, TGFA, CRIM1, FUT9, VAV1, CDH20, MYT1L, ZNF160, TJP1, LDLRAD4, NPHP4, EGFLAM, PACSIN2, CNTN1, HLA-B, IQSEC1, MTHFD1L, SNX3, PDLIM5, BRCA2, DISC1, DNER, WPCP, NRK, SLC10A7, SEMA3A, STRN, BMP2, RC3H2, UNC5D, TRAK1, PSG9, PTC2, NCAM2, GFI1B, MSI2, BMP2K, RNF38, SEMA3D, ASXL3, PDE6C, RELN, HMB1, FGF9, NFATC2, TDRD7, UST, CPAMD8, RTTN, MD1, SLC23A2, ESRP1, TTC21B, ETS2, DOCK1, B4GALT6, TSPAN2, RAP1GAP, PLS1, SRGAP2, NIN, DRAXIN, ATF1, SLAMF1, SMARCA2, ETS1, GLI3, MEGF11, SMARCC1, AFF3, SLC9A4, SMOC2, PCP4, CASP5, CUL1, MYEF2, RERE, MAP2, DAW1, LAMC1, FARP1, TDRD5, ATF2, HIRA, UMODL1, BBS4, LAMC3, HIVEP3, COL5A1, CFTR, KPNA1, NELL1, DOP1B, KITLG, DCC, MYT1, RCAN1, GTF2I, RORB, TADA2A, DAB1, SELENON, RB1CC1, MYO3A, PRKN, MTMR2, SH3PXD2A, TBX20, DACH1, PCDH15, DPF3, LGI2, NGEF, GRIN2A, ARID5B, JPH1, ATXN1, CDH23, PRKCH, TG, IL6R, ALS2, RACGAP1, ACO1, TFDP1, DMC1, LCE3B, TOX, PTPRB, PDE6A, SCN10A, SHANK2, VAV3, MESD, ITSN2, SOX30, PTGFRN, SYBU, ARHGEF28, NPAS2, ADGRG6, YIPF6, SEC24D, ROCK1, LYN, VCAM1, CTSS, EIF2B3, LRIG1, DTX1, TENM2, OVOL2, NTN1, MMP16, ZFXH3, DPYSL5, ARID1B, HOXC13, CRACR2A, CASZ1, INSR, DMBT1, YTHDF3, HECTD1, SHROOM3, XRCC4, COLQ, HDAC11, DDHD1, PBX3, SNAI2, ASH1L, HOXC4, SIAH2, TANC2, UFD1, RXRG, SP3, MBTPS2, FLNB, TRIM58, TIAL1, PLPP4, NREP, ZDHHC17, NSD2, CERS3, SLC22A14, CD9, CARD10, KRT6B, XKR5, JCAD, SAMHD1, IFT81, ENPP1, UTRN, RASGRP1, DZANK1, NDRG2, BMP5, WDR72, KCNC1, CSF1, GHRH, HDGFL3, BCL2L1, KRT25, CTDP1, HCN1, PRKG1, LAMA3, ASB4, GRIN2B, INO80, CNMD, DHRS3, SMAD5, CELF4, SYNJ2, FOXN3, VSTM4, SLC40A1, MYCL, TNN, CABYR, PSAP, MICALL2, MED1, ATG4B, KDM6A, ATRN, IL33, AJAP1, ROR2, ZNF521, KLCSDE1, FAT1, LMX1A, TMEM178A, IL10, ACTR2, SCML2, CLSTN2, TTC39C, PTH, SOSTDC1, SOHLH1, PACRG, ABHD2, MAP6, VASP, ETV6, TACC2, PALMD, IQGAP1, TEAD1, ANP32B, YBX3, AIMP1, NRXN1, PCID2, HIPK1, FRY, CIBAR1, CACYBP, CADM1, LMX1B, ANLN, TWIST1 </p> |
|--|--|--|------------------------------------------------------------------------------------------------------------------------------------------------------------------------------------------------------------------------------------------------------------------------------------------------------------------------------------------------------------------------------------------------------------------------------------------------------------------------------------------------------------------------------------------------------------------------------------------------------------------------------------------------------------------------------------------------------------------------------------------------------------------------------------------------------------------------------------------------------------------------------------------------------------------------------------------------------------------------------------------------------------------------------------------------------------------------------------------------------------------------------------------------------------------------------------------------------------------------------------------------------------------------------------------------------------------------------------------------------------------------------------------------------------------------------------------------------------------------------------------------------------------------------------------------------------------------------------------------------------------------------------------------------------------------------------------------------------------------------------------------------------------------------------------------------------------------------------------------------------------------------------------------------------------------------------------------------------------------------------------------------------------------------------------------------------------------------------------------------------------------------------------------------------------------------------------------------------------------------------------------------------------------------------------------------------------------------------------------------------------------------------------------------------------------------------------------------------------------------------------------------------------------------------------------------------------------------------------------------------------------------------------------------------------------------------------------------------------------------------------------------------------------------------------------------------------------------------------------------------------------------------------------------------------------------------------------------------------------------------------------------------------------------------------------------------------------------------------------------------------------------------------------------------------------------------------------------------------------------------------------------------------------------------------------------------------------------------------------------------------------------------------------------------------------------------------------------------------------------------------------------------------------------------------------------------------------------------------------------------------------------------------------------------------------------------------------------------------------------------------------------------------------------------------------------------------------------------------------------------------------------------------------------------------------------------------------------------------------------------------------------------------------------------------------|

|                |                                      |                               |                                                                                                                                                                                                                                                                                                                                                                                                                                                                                                                                                                                                                                                                                                                                                                                                                                                                                                                                                                                                                                                                                                                                                                                                                                                                                                                                                                                                                                                                                                                                                                                                                                                                                                                                                                                                                                                                                                                                                                                                                                                                                                                                                                                                                                                                                                                                                                                                                                                                                                                                                                                                                                                                                                                                                                                                          |
|----------------|--------------------------------------|-------------------------------|----------------------------------------------------------------------------------------------------------------------------------------------------------------------------------------------------------------------------------------------------------------------------------------------------------------------------------------------------------------------------------------------------------------------------------------------------------------------------------------------------------------------------------------------------------------------------------------------------------------------------------------------------------------------------------------------------------------------------------------------------------------------------------------------------------------------------------------------------------------------------------------------------------------------------------------------------------------------------------------------------------------------------------------------------------------------------------------------------------------------------------------------------------------------------------------------------------------------------------------------------------------------------------------------------------------------------------------------------------------------------------------------------------------------------------------------------------------------------------------------------------------------------------------------------------------------------------------------------------------------------------------------------------------------------------------------------------------------------------------------------------------------------------------------------------------------------------------------------------------------------------------------------------------------------------------------------------------------------------------------------------------------------------------------------------------------------------------------------------------------------------------------------------------------------------------------------------------------------------------------------------------------------------------------------------------------------------------------------------------------------------------------------------------------------------------------------------------------------------------------------------------------------------------------------------------------------------------------------------------------------------------------------------------------------------------------------------------------------------------------------------------------------------------------------------|
|                |                                      |                               | , AKT3 ,ALKAL2 ,JAK2 ,VSX1 ,FSTL1 ,ISX ,BPNT1 ,SVEP1 ,RBM19 ,<br>CELSR2 ,CREBBP ,MELTF ,ARL11 ,GORAB ,PCNA ,SIAH3 ,UFL1 ,ADA<br>MTS5 ,NFKBIA ,PRKCB ,NTM ,ABCC8 ,ANXA4 ,SMTN ,ALX4 ,USH1C ,S<br>MPD4 ,NEDD9 ,OLFM4 ,ITGA6 ,ATP2B1 ,GAP43 ,ASS1 ,GRIP1 ,CTNN<br>BL1 ,ADCY9 ,EML1 ,PPP1R17 ,XKR6 ,OTOP1 ,EXT2 ,KRT6A ,STOX2 ,<br>AGO1 ,MEOX2 ,GRXCR1 ,STAT1 ,NR2C1 ,MAP2K6 ,CMTM7 ,DGKG ,SHR<br>OOM2 ,SLC6A11 ,MTPN ,ABI1 ,MYO18B ,ARMC6 ,POU6F2 ,IMPACT ,C<br>CBE1 ,ADAMTS18 ,ITGA4 ,FBXL17 ,POU1F1 ,ADCYAP1R1 ,MTF2 ,CS<br>MD1 ,NCAPG2 ,FOXP2 ,ASB2 ,MYOCD ,CEP120 ,DHTKD1 ,CYFIP2 ,KR<br>T85 ,ST8SIA4 ,MEF2C ,ADGRB1 ,RXRA ,WNT7A ,RBPMS2 ,MAP3K5 ,N<br>DFIP1 ,MAP3K4 ,WASF3 ,S100B ,PRDM13 ,FOXO6 ,PDE2A ,FBXW8 ,S<br>DCBP ,NECTIN1 ,WWOX ,NCK1 ,FLVCR1 ,FGR ,DRC7 ,PPP2R3A ,DNMB<br>P ,TOP1 ,SPRR2D ,RNF8 ,LCE3D ,EPHA4 ,EMP1 ,GABRA5 ,MECOM ,DN<br>MT3L ,NTRK2 ,IL1RAPL1 ,FNDC3A ,RSPH1 ,NUMB ,LHX9 ,ADAMTS9 ,<br>WNT2B ,TNNT1 ,POSTN ,CD101 ,MEGF10 ,IL17RD ,FBXO31 ,GRIK1 ,<br>PRKAB1 ,IREB2 ,HS6ST1 ,PTK2 ,MARK4 ,CDH5 ,ANKRD6 ,NFKBID ,A<br>RHGAP12 ,CLDN18 ,DIAPH1 ,FEZ2 ,LAMB1 ,CYFIP1 ,UBE3A ,PCDH8<br>,SEMA4D ,JAM2 ,FRMD6 ,FAT4 ,AP2B1 ,RUNX1 ,AKR1B1 ,WNT5B ,SA<br>NBR ,ASAP1 ,DPY19L2 ,SORBS2 ,PDCL3 ,CCDC88A ,GPR55 ,NSUN2 ,<br>ADAMTS16 ,SPAG6 ,BICD1 ,TNFSF11 ,FYN ,MYL12B ,ADGRL2 ,UNC4<br>5B ,ARL13B ,HYDIN ,SCN8A ,HDAC2 ,GON4L ,TBX15 ,NCS1 ,COL18A<br>1 ,CDH9 ,LHFPL2 ,ATP5PF ,DOK5 ,UGP2 ,CRTAM ,COL19A1 ,APELA ,<br>MDGA2 ,ROR1 ,FUT8 ,TET1 ,ARNT2 ,HECW2 ,CDH2 ,CNTN5 ,ITGA8 ,N<br>TN4 ,XRN2 ,PHLPP1 ,GPR137B ,EPHB1 ,EYS ,RP1L1 ,GRM5 ,DDX10 ,<br>ADCK1 ,RPS6KA5 ,PTPRG ,PID1 ,NRP1 ,SDK1 ,PRKCA ,FAIM ,ITGA1<br>,RC3H1 ,NRIP1 ,CHODL ,POR ,BCR ,TUT4 ,NRXN3 ,KIF16B ,CDH12 ,<br>SNRK ,C14ORF39 ,FBLN1 ,STK36 ,PAQR5 ,MB ,RAG1 ,B9D1 ,DGCR2 ,<br>RRAS2 ,BMPER ,CUX1 ,MACROH2A1 ,MITF ,EPHB2 ,IGSF3 ,SGCG ,CD<br>38 ,EYA4 ,MET ,CDH17 ,SPECC1 ,PPFIA2 ,CDH13 ,ATG5 ,NRAP ,MAG<br>I2 ,KIAA1217 ,VMP1 ,UNK ,FAM171A1 ,ADAM29 ,FLRT2 ,MYB ,KALR<br>N ,SLC1A2 ,GNAS ,LAMA1 ,MFHAS1 ,GREB1L ,SERPINB7 ,CA10 ,CPQ<br>,ATRNL1 ,TIAM2 ,IGSF21 ,BMP7 ,ASTN2 ,DLG5 ,GABRA2 ,KIRREL3<br>,BTD ,BPTF ,NUDT21 ,DDX6 ,ADGRF5 ,PDGFC ,ABL2 ,TRAPPC6B ,RF<br>X2 ,NECAB1 ,EYA1 ,FHOD3 ,SLIT2 ,EXOC4 ,FAM126A ,CCDC141 ,ER<br>BB4 ,SYNDIG1 ,ROBO1 ,PBX1 ,PRKCQ ,ANTXR1 ,NDRG1 ,MYH15 ,SIP<br>A1L3 ,MGMT ,NLGN1 ,CTTNBP2 ,SHLD2 ,NOS1 ,SLC6A3 ,ASIC2 ,EFN<br>A5 ,TCF12 ,VCAN ,EHMT1 ,SLIT3 ,ESR1 ,NTNG1 ,KDM4B ,LOXL2 ,NY<br>AP2 ,PRLR ,FOXB1 ,RAD51B ,CAMK1D ,PIK3R3 ,MACROD2 ,CFAP44 ,<br>OPCML ,CATSPERE ,FER ,EYA2 ,CCR2 ,RPGRIP1 ,STARD13 ,A2M ,EP<br>S8 ,SEMA4B ,ROCK2 ,PRDM1 ,RORA ,ATAT1 ,DMRT1 ,CATSPER2 ,HSP<br>G2 ,PTPRQ ,CSMD3 ,NCOA6 ,HSD17B2 ,COL4A3 ,RGS7 ,HOOK3 ,PCSK<br>2 ,FSTL4 ,STK3 ,ZNF423 ,ZNF568 ,HNRNPU ,APCDD1 ,IGF1R ,GLI2<br>,THRB ,LSAMP ,AKAP13 ,MORC3 ,ATP10A ,DNM1L |
| GO:00<br>07399 | nervous<br>system<br>developmen<br>t | 4.12590<br>1321282<br>941e-36 | NOTCH2 ,BRINP3 ,MTOR ,CNTN4 ,SPOCK1 ,INMP2L ,LRP12 ,PTPRD ,<br>TRAPPC9 ,LRRC4C ,MYO9A ,ULK2 ,PLCB1 ,ZNF536 ,TENM4 ,DLC1 ,R<br>IPOR2 ,RP1 ,STXBP1 ,RALA ,IL1RAPL2 ,BCL2 ,ODAD2 ,ALDH1A2 ,A<br>RHGAP26 ,CHRNA7 ,ROBO2 ,RIMS1 ,TENM3 ,GABRB3 ,ZEB1 ,SDCCAG<br>8 ,RARB ,NAV2 ,PLPPR1 ,USH2A ,MINAR1 ,RIMS2 ,ALK ,AUTS2 ,AST<br>N1 ,NEGR1 ,GPC6 ,CNTNAP2 ,MAP4 ,APC ,RBFOX3 ,PLPPR5 ,DSCAM ,<br>RTN1 ,TCF4 ,CRKL ,SOX5 ,SETD2 ,TNIK ,SLC4A10 ,DOCK10 ,EGFR ,<br>MACF1 ,PRKACB ,RNF220 ,NEDD4 ,CRB1 ,BCL11A ,SOX6 ,CECR2 ,CD<br>H4 ,ATP2B2 ,NTRK3 ,PHACTR1 ,GABRB1 ,NEO1 ,CNTN6 ,SLC39A12 ,<br>CABLES1 ,SLC8A3 ,PRKD1 ,PAK1 ,EPHA7 ,CHRM3 ,SPEN ,RAPGEF2 ,<br>LRP2 ,ADGRB3 ,RUNX2 ,ARSB ,FGF12 ,TAOK3 ,ADAMTSL1 ,LDB2 ,GR<br>M7 ,LUZP1 ,EPB41L3 ,SSBP3 ,RAPGEF5 ,TBCD ,NEDD4L ,HDAC9 ,AP<br>P ,DCLK1 ,STAU2 ,GABRG2 ,TMC1 ,SEMA5A ,SYT1 ,VCL ,ARHGAP44 ,<br>NTF3 ,AURKA ,SLC8A1 ,SRGAP2C ,FIG4 ,SRGAP2B ,KANK1 ,MAP4K4<br>,ABCD2 ,BMPR1B ,CTNNA2 ,PAK3 ,TTLL7 ,DIP2B ,TRPC5 ,CHST8 ,D<br>NM3 ,IFT57 ,PRKCZ ,SNTG2 ,KLHL1 ,DIP2A ,MCPH1 ,ZSWIM6 ,HECW<br>1 ,COBL ,YAP1 ,ESS2 ,FRYL ,NFIA ,BRINP1 ,MAPK1 ,ADAM22 ,ALCA<br>M ,NRG3 ,NCAM1 ,GFRA1 ,NIPBL ,FAT3 ,CHN1 ,ACSBG1 ,MBNL1 ,PAF<br>AH1B1 ,NF2 ,RBFOX1 ,CTNNA1 ,PPP1R9A ,KLF15 ,MEIS2 ,NFIB ,PR<br>TG ,SYNJ1 ,TIAM1 ,ENAH ,SEMA3C ,NAV3 ,SLC24A4 ,TMEM108 ,DNA<br>H11 ,JARID2 ,SCN2A ,IL34 ,ANK2 ,ADGRV1 ,SYNE2 ,BBS2 ,WNT9B ,<br>SEMA6D ,SMARCA4 ,CDH11 ,FABP7 ,PARD3 ,MAPKAP1 ,BLK ,TNR ,MB<br>D5 ,ATRX ,ELAVL4 ,ABL1 ,HDAC4 ,SLC1A1 ,SDC2 ,LRFN5 ,CRTAC1 ,                                                                                                                                                                                                                                                                                                                                                                                                                                                                                                                                                                                                                                                                                                                                                                                                                                                                                                                                                                                                                                                                                                                                                                                                                                                                                              |

|            |                                    |                       |                                                                                                                                                                                                                                                                                                                                                                                                                                                                                                                                                                                                                                                                                                                                                                                                                                                                                                                                                                                                                                                                                                                                                                                                                                                                                                                                                                                                                                                                                                                                                                                                                                                                                                                                                                                                                                                                                                                                                                                                                                                                                                                                                                                                                                                                                                                                                                                                                                                                                                                                                                                                                                                                                                                                                                                                                                                                                                                                            |
|------------|------------------------------------|-----------------------|--------------------------------------------------------------------------------------------------------------------------------------------------------------------------------------------------------------------------------------------------------------------------------------------------------------------------------------------------------------------------------------------------------------------------------------------------------------------------------------------------------------------------------------------------------------------------------------------------------------------------------------------------------------------------------------------------------------------------------------------------------------------------------------------------------------------------------------------------------------------------------------------------------------------------------------------------------------------------------------------------------------------------------------------------------------------------------------------------------------------------------------------------------------------------------------------------------------------------------------------------------------------------------------------------------------------------------------------------------------------------------------------------------------------------------------------------------------------------------------------------------------------------------------------------------------------------------------------------------------------------------------------------------------------------------------------------------------------------------------------------------------------------------------------------------------------------------------------------------------------------------------------------------------------------------------------------------------------------------------------------------------------------------------------------------------------------------------------------------------------------------------------------------------------------------------------------------------------------------------------------------------------------------------------------------------------------------------------------------------------------------------------------------------------------------------------------------------------------------------------------------------------------------------------------------------------------------------------------------------------------------------------------------------------------------------------------------------------------------------------------------------------------------------------------------------------------------------------------------------------------------------------------------------------------------------------|
|            |                                    |                       | <p> DNAH5 , RAPIA , FGF10 , GRID2 , GALT , NRG1 , ASPM , RASGRF1 , ZBTB16 , MUSK , SH3GL3 , USP33 , PTPRO , EGF , TRIO , EXT1 , RPS6KA3 , CTNND2 , ATP8A2 , PLXNA2 , ATXN3 , ARHGEF7 , AMBRA1 , KDM7A , OPRM1 , KREMEN1 , SEMA3E , MARK2 , TMOD2 , HERC1 , IGF2BP3 , EPHA6 , APBA2 , LINGO2 , ATL1 , CDKN2C , KNDC1 , AFG3L2 , MOSMO , GFRA2 , MNAT1 , ANK3 , BCL11B , ECE1 , MBP , AK8 , CRIM1 , FUT9 , MYT1L , NPHP4 , CNTN1 , IQSEC1 , MTHFD1L , SNX3 , PDLIM5 , BRCA2 , DISC1 , DNER , WPCP , NRK , SEMA3A , STRN , BMP2 , UNC5D , TRAK1 , NCAM2 , SEMA3D , PDE6C , RELN , HMGB1 , FGF9 , UST , SLC23A2 , ESRP1 , TTC21B , B4GALT6 , TSPAN2 , RAP1GAP , PLS1 , SRGAP2 , NIN , DRAXIN , ATF1 , SMARCA2 , GLI3 , SMARCC1 , PCP4 , CASP5 , MYEF2 , RERE , MAP2 , FARP1 , ATF2 , BBS4 , LAMC3 , NELL1 , DCC , MYT1 , RORB , DAB1 , PRKN , MTMR2 , TBX20 , PCDH15 , DPF3 , LGI2 , NGEF , GRIN2A , ATXN1 , CDH23 , PRKCH , TG , ALS2 , RACGAP1 , TOX , PTPRB , SHANK2 , ITSN2 , SYBU , NPAS2 , ADGRG6 , ROCK1 , LYN , VCAM1 , EIF2B3 , LRIG1 , DTX1 , TENM2 , OVOL2 , NTN1 , ZFH3 , DPYSL5 , ARID1B , CASZ1 , HECTD1 , SHROOM3 , COLQ , HDAC11 , PBX3 , TANC2 , RXRG , NREP , ZDHHC17 , CD9 , DZANK1 , ND RG2 , BMP5 , KCNC1 , CSF1 , GHRH , HDGFL3 , HCN1 , PRKG1 , LAMA3 , GRIN2B , SYNJ2 , MYCL , TNN , MICALL2 , MED1 , KDM6A , ATRN , IL133 , ROR2 , ZNF521 , LMX1A , ACTR2 , CLSTN2 , MAP6 , VASP , ETV6 , TACC2 , IQGAP1 , ANP32B , NRXN1 , HIPK1 , FRY , CADM1 , LMX1B , TWIST1 , AKT3 , ALKAL2 , JAK2 , VSX1 , ISX , BPNT1 , CELSR2 , GORAB , UFL1 , NTM , ABCC8 , USH1C , ITGA6 , ATP2B1 , GAP43 , GRIP1 , EML1 , PPP1R17 , GRCR1 , DGKG , SHROOM2 , SLC6A11 , MTPN , ABI1 , POU6F2 , IMPACT , ITGA4 , FBXL17 , POU1F1 , FOXP2 , CEP120 , CYFIP2 , ST8SIA4 , MEF2C , ADGRB1 , WNT7A , WASF3 , S100B , PRDM13 , FOXO6 , FBXW8 , SDCBP , NECTIN1 , NCK1 , PPP2R3A , EPHA4 , GABRA5 , NTRK2 , IL1RAPL1 , NUMB , LHX9 , WNT2B , FBXO31 , GRIK1 , HS6ST1 , PTK2 , MARK4 , FEZ2 , LAMB1 , CYFIP1 , UBE3A , SEMA4D , JAM2 , FAT4 , RUNX1 , WNT5B , ASAP1 , CCDC88A , SPAG6 , FYN , ADGRL2 , ARL13B , HYDIN , SCN8A , HDAC2 , NCS1 , ATP5PF , DOK5 , UGP2 , MDGA2 , ROR1 , ARNT2 , HECW2 , CDH2 , CNTN5 , ITGA8 , NTN4 , XRN2 , EPHB1 , RP1L1 , GRM5 , RPS6KA5 , PTPRG , NRP1 , SDK1 , FAIM , ITGA1 , CHODL , BCR , NRXN3 , STK36 , RRAS2 , CUX1 , EPHB2 , CD38 , MET , PPFIA2 , MAGI2 , UNK , FLRT2 , KALRN , SLC1A2 , LAMA1 , CA10 , TIAM2 , IGSF21 , BMP7 , ASTN2 , DLG5 , GABRA2 , KIRREL3 , BTBD , BPTF , DDX6 , PDGFC , ABL2 , TRAPPC6B , EYA1 , SLIT2 , FAM126A , CCDC141 , ERBB4 , SYNDIG1 , ROBO1 , PBX1 , PRKCQ , NDRG1 , NLGN1 , CTTNBP2 , SLC6A3 , ASIC2 , EFNA5 , TCF12 , VCAN , SLIT3 , NTNG1 , KDM4B , NYAP2 , FOXB1 , CAMK1D , MACROD2 , OPCML , CCR2 , RPRGIP1 , SEMA4B , PRDM1 , RORA , ATAT1 , HSPG2 , PTPRQ , CSMD3 , NCOA6 , RGS7 , HOOK3 , PCSK2 , FSTL4 , STK3 , ZNF423 , APCDD1 , IGF1R , GLI2 , THRB , LSAMP </p> |
| GO:0007275 | multicellular organism development | 6.175511944125696e-36 | <p> NOTCH2 , BCAR3 , BRINP3 , MTOR , CNTN4 , SPOCK1 , SGCD , IMP2L , LRP12 , PTPRD , FREM1 , TRAPPC9 , BNC2 , NEBL , LRRC4C , SMOC1 , MYO9A , ULK2 , SCAPER , PLCB1 , ZNF536 , TAF4 , ZFPM2 , TENM4 , DLC1 , ZDHHC21 , RIPOR2 , RP1 , STXBP1 , RALA , IL1RAPL2 , BCL2 , ODAD2 , ALDH1A2 , ARHGAP26 , FBN1 , CHRNA7 , ROBO2 , RIMS1 , TENM3 , GABRB3 , ZEB1 , AKR1C3 , SDCCAG8 , RARB , SPRED1 , NAV2 , ENPEP , MYO1E , PLPPR1 , USH2A , MINAR1 , RIMS2 , ALK , AUTS2 , FOXJ2 , PAPP2 , ASTN1 , RIN2 , ANO6 , NEGR1 , MLLT3 , GPC6 , CNTNAP2 , MAP4 , MYO3B , APC , RBFOX3 , PLPPR5 , DSCAM , RTN1 , TCF4 , CRKL , SOX5 , SETD2 , ARHGAP24 , TNIK , SLC4A10 , PTPRJ , KDM4C , DOCK4 , EGFR , RFX3 , ANGPT1 , MACF1 , PRKACB , RNF220 , DOCK2 , NEDD4 , CRB1 , BCL11A , SOX6 , CECR2 , CHSY1 , FLI1 , CDH4 , ATP2B2 , NTRK3 , RXFP1 , C5 , PHACTR1 , DKK2 , FLT1 , ADAMTS6 , GABRB1 , EDAR , NEO1 , CNTN6 , SLC39A12 , CABLES1 , SLC8A3 , PRKD1 , PAK1 , EPHA7 , CHRM3 , SPEN , RAPGEF2 , LRP2 , ADGRB3 , RUNX2 , ARSB , FGF12 , CPS1 , TAOK3 , ONECUT1 , TMEM38B , ADAMTS1 , LDB2 , GRM7 , GHR , LUZP1 , EPB41L3 , COL4A2 , SSBP3 , RAPGEF5 , TBCD , NEDD4L , ADAM10 , HDAC9 , APP , ABCB5 , RPS6KA2 , CACNA1C , DCLK1 , STAU2 , GABRG2 , TMC1 , SEMA5A , SYT1 , VCL , ARHGAP44 , NTF3 , AURKA , PYGO1 , SLC8A1 , PTPRR , SRGAP2C , FIG4 , CMIP , SRGAP2B , KANK1 , MAP4K4 , ABCD2 , BMP1B , THSD7A , PCSK6 , AKAP6 , CTNNA2 , ARNT , PAK3 , TLL7 , DIP2B , ITPKB , TRPC5 , CHST8 , DNM3 , NBN , IFT57 , RBM47 , PRKCZ , CALD1 , SNTG2 , KLHL1 , DIP2A , MSH6 , MCPH1 , COL27A1 , ZSWIM6 , HECW1 , COBL , YAP1 , ESS2 , FRYL , NFIA , BRINP1 , MAPK1 , ADAM22 , CRISPLD2 , KMT2E , A </p>                                                                                                                                                                                                                                                                                                                                                                                                                                                                                                                                                                                                                                                                                                                                                                                                                                                                                                                                                                                                                                                                                                                                                                                                                                                   |

|  |  |  |                                                                                                                                                                                                                                                                                                                                                                                                                                                                                                                                                                                                                                                                                                                                                                                                                                                                                                                                                                                                                                                                                                                                                                                                                                                                                                                                                                                                                                                                                                                                                                                                                                                                                                                                                                                                                                                                                                                                                                                                                                                                                                                                                                                                                                                                                                                                                                                                                                                                                                                                                                                                                                                                                                                                                                                                                                                                                                                                                                                                                                                                                                                                                                                                                                                                                                                                                                                                                                                                                                                                                                                                                                                                                                                                                                                                                                                                                                                                                                                                                                                                                                                                                                                                                                                                                                                                                                                                                                                                                |
|--|--|--|--------------------------------------------------------------------------------------------------------------------------------------------------------------------------------------------------------------------------------------------------------------------------------------------------------------------------------------------------------------------------------------------------------------------------------------------------------------------------------------------------------------------------------------------------------------------------------------------------------------------------------------------------------------------------------------------------------------------------------------------------------------------------------------------------------------------------------------------------------------------------------------------------------------------------------------------------------------------------------------------------------------------------------------------------------------------------------------------------------------------------------------------------------------------------------------------------------------------------------------------------------------------------------------------------------------------------------------------------------------------------------------------------------------------------------------------------------------------------------------------------------------------------------------------------------------------------------------------------------------------------------------------------------------------------------------------------------------------------------------------------------------------------------------------------------------------------------------------------------------------------------------------------------------------------------------------------------------------------------------------------------------------------------------------------------------------------------------------------------------------------------------------------------------------------------------------------------------------------------------------------------------------------------------------------------------------------------------------------------------------------------------------------------------------------------------------------------------------------------------------------------------------------------------------------------------------------------------------------------------------------------------------------------------------------------------------------------------------------------------------------------------------------------------------------------------------------------------------------------------------------------------------------------------------------------------------------------------------------------------------------------------------------------------------------------------------------------------------------------------------------------------------------------------------------------------------------------------------------------------------------------------------------------------------------------------------------------------------------------------------------------------------------------------------------------------------------------------------------------------------------------------------------------------------------------------------------------------------------------------------------------------------------------------------------------------------------------------------------------------------------------------------------------------------------------------------------------------------------------------------------------------------------------------------------------------------------------------------------------------------------------------------------------------------------------------------------------------------------------------------------------------------------------------------------------------------------------------------------------------------------------------------------------------------------------------------------------------------------------------------------------------------------------------------------------------------------------------------------------|
|  |  |  | <p> LCAM, PLG, PDGFD, ZNRF3, NRG3, NCAM1, GFRA1, NIPBL, GABPA, F<br/> AT3, CHN1, MYLK3, ACSBG1, FMN1, MBNL1, PAFAH1B1, ATF6, EFEM<br/> P1, TLL1, DCAF1, ITGB8, TPM1, NF2, RBFOX1, CTNNA1, PPP1R9A,<br/> ANKRD11, BIRC6, KLF15, PPARA, MEIS2, NFIB, PRTG, SYNJ1, NR5<br/> A2, ADAMTS3, TIAM1, ENAH, SF3B6, SEMA3C, NAV3, SLC24A4, TME<br/> M108, AGO2, ALPK2, DNAH11, JARID2, SCN2A, CPE, IL34, ANK2, A<br/> DGRV1, MELK, BCAS3, RYR2, SYNE2, BBS2, WNT9B, RANBP3L, SEMA<br/> 6D, ANKS6, SMARCA4, CDH11, LDB3, FABP7, PARD3, MAPKAP1, BLK<br/> , TNFR, COL22A1, CXADR, MBD5, ATRX, XIRP2, ELAVL4, ABL1, HDAC<br/> 4, SLC1A1, SDC2, GAS2, LRFN5, CRTAC1, DROSHA, TTLL5, L3MBTL<br/> 3, APLF, DNAH5, RAP1A, CAMK4, FGF10, GRID2, GALT, LATS2, NRG<br/> 1, INO80D, ASPM, AP3B1, RASGRF1, ATP11C, ZBTB16, MUSK, ZNF6<br/> 75, SH3GL3, SETDB2, NXN, USP33, FBN2, CD44, PTPRO, EGF, ALPK<br/> 3, TRIO, EXT1, SPRED2, ADAMTS2, RPS6KA3, CTNND2, NHS, ATP8A<br/> 2, PTPN2, PLXNA2, ATXN3, ST8SIA6, ARHGEF7, AMBRA1, KDM7A, O<br/> PRM1, FANCA, CYP4A11, KREMEN1, SEMA3E, MARK2, ALPL, FHL2, T<br/> MOD2, HERC1, MSH2, IGF2BP3, CDIN1, EPHA6, ANKRD17, APBA2, L<br/> INGO2, ATL1, CDKN2C, EPN2, EVC, KNDC1, AFG3L2, MOSMO, GFRA2<br/> , MNAT1, RBBP8, SGCZ, ADAM12, MYLK2, ANK3, EMILIN2, XYLT1, H<br/> MGA2, BCL11B, ECE1, MBP, AK8, TRPS1, PLCE1, TGFA, CRIM1, FUT<br/> 9, VAV1, MYT1L, ZNF160, TJP1, NPHP4, CNTN1, HLA-<br/> B, IQSEC1, MTHFD1L, SNX3, PDLIM5, BRCA2, DISC1, DNER, WDPCP<br/> , NRK, SLC10A7, SEMA3A, STRN, BMP2, RC3H2, UNC5D, TRAK1, PSG<br/> 9, PTCDD2, NCAM2, GFI1B, BMP2K, RNF38, SEMA3D, PDE6C, RELN, H<br/> MGB1, FGF9, NFATC2, TDRD7, UST, CPAMD8, RTTN, MDM1, SLC23A2<br/> , ESRP1, TTC21B, ETS2, DOCK1, B4GALT6, TSPAN2, RAP1GAP, PLS<br/> 1, SRGAP2, NIN, DRAXIN, ATF1, SLAMF1, SMARCA2, ETS1, GLI3, M<br/> EGF11, SMARCC1, AFF3, SMOC2, PCP4, CASP5, MYEF2, RERE, MAP2<br/> , DAW1, FARP1, TDRD5, ATF2, HIRA, UMODL1, BBS4, LAMC3, COL5A<br/> 1, CFTR, NELL1, DOP1B, KITLG, DCC, MYT1, GTF2I, RORB, TADA2A<br/> , DAB1, SELENON, RB1CC1, MYO3A, PRKN, MTMR2, SH3PXD2A, TBX2<br/> 0, DACH1, PCDH15, DPF3, LGI2, NGEF, GRIN2A, ARID5B, ATXN1, C<br/> DH23, PRKCH, TG, IL6R, ALS2, RACGAP1, ACO1, DMC1, TOX, PTPRB<br/> , PDE6A, SHANK2, VAV3, ITSN2, SYBU, NPAS2, ADGRG6, YIPF6, SE<br/> C24D, ROCK1, LYN, VCAM1, EIF2B3, LRIG1, DTX1, TENM2, OVOL2,<br/> NTN1, MMP16, ZFXH3, DPYSL5, ARID1B, HOXC13, CRACR2A, CASZ1<br/> , INSR, YTHDF3, HECTD1, SHROOM3, XRCC4, COLQ, HDAC11, PBX3,<br/> SNAI2, ASH1L, HOXC4, SIAH2, TANC2, UFD1, RXRG, SP3, MBTPS2,<br/> TRIM58, PLPP4, NREP, ZDHHC17, NSD2, CD9, CARD10, JCAD, SAMH<br/> D1, ENPP1, RASGRP1, DZANK1, NDRG2, BMP5, KCNC1, CSF1, GHRH,<br/> HDGFL3, BCL2L1, CTDP1, HCN1, PRKG1, LAMA3, ASB4, GRIN2B, IN<br/> O80, CNMD, DHRS3, SMAD5, CELF4, SYNJ2, FOXN3, VSTM4, SLC40A<br/> 1, MYCL, TNN, PSAP, MICALL2, MED1, KDM6A, ATRN, IL33, AJAP1,<br/> ROR2, ZNF521, KL, CSDE1, FAT1, LMX1A, TMEM178A, IL10, ACTR2<br/> , CLSTN2, TTC39C, PTH, SOSTDC1, MAP6, VASP, ETV6, TACC2, IQG<br/> AP1, TEAD1, ANP32B, YBX3, AIMP1, NRXN1, PCID2, HIPK1, FRY, C<br/> IBAR1, CACYBP, CADM1, LMX1B, ANLN, TWIST1, AKT3, ALKAL2, JA<br/> K2, VSX1, ISX, BPNT1, SVEP1, RBM19, CELSR2, CREBBP, ARL11, G<br/> ORAB, PCNA, SIAH3, UFL1, NFKBIA, PRKCB, NTM, ABCC8, ALX4, US<br/> H1C, SMPD4, NEDD9, ITGA6, ATP2B1, GAP43, ASS1, GRIP1, CTNNB<br/> L1, ADCY9, EML1, PPP1R17, OTOF1, EXT2, STOX2, AGO1, MEOX2, G<br/> RXCR1, STAT1, MAP2K6, CMTM7, DGKG, SHROOM2, SLC6A11, MTPN,<br/> ABI1, MYO18B, ARMC6, POU6F2, IMPACT, CCBE1, ADAMTS18, ITGA<br/> 4, FBXL17, POU1F1, ADCYAP1R1, MTF2, CSMD1, NCAPG2, FXP2, A<br/> SB2, MYOCD, CEP120, DHTKD1, CYFIP2, ST8SIA4, MEF2C, ADGRB1<br/> , RXRA, WNT7A, RBPM52, NDFIP1, MAP3K4, WASF3, S100B, PRDM13<br/> , FOXO6, PDE2A, FBXW8, SDCBP, NECTIN1, WWOX, NCK1, FLVCR1, F<br/> GR, PPP2R3A, TOP1, RNF8, EPHA4, GABRA5, MECOM, DNMT3L, NTRK<br/> 2, IL1RAPL1, FNDC3A, NUMB, LHX9, ADAMTS9, WNT2B, TNNT1, CD1<br/> 01, FBXO31, GRIK1, PRKAB1, IREB2, HS6ST1, PTK2, MARK4, CDH5<br/> , NFKBID, CLDN18, FEZ2, LAMB1, CYFIP1, UBE3A, PCDH8, SEMA4D<br/> , JAM2, FAT4, AP2B1, RUNX1, AKR1B1, WNT5B, SANBR, ASAP1, SOR<br/> BS2, PDCL3, CCDC88A, GPR55, NSUN2, ADAMTS16, SPAG6, TNFSF1<br/> 1, FYN, ADGRL2, UNC45B, ARL13B, HYDIN, SCN8A, HDAC2, GON4L,<br/> TBX15, NCS1, COL18A1, LHFPL2, ATP5PF, DOK5, UGP2, CRTAM, CO<br/> L19A1, APELA, MDGA2, ROR1, FUT8, TET1, ARNT2, HECW2, CDH2, C </p> |
|--|--|--|--------------------------------------------------------------------------------------------------------------------------------------------------------------------------------------------------------------------------------------------------------------------------------------------------------------------------------------------------------------------------------------------------------------------------------------------------------------------------------------------------------------------------------------------------------------------------------------------------------------------------------------------------------------------------------------------------------------------------------------------------------------------------------------------------------------------------------------------------------------------------------------------------------------------------------------------------------------------------------------------------------------------------------------------------------------------------------------------------------------------------------------------------------------------------------------------------------------------------------------------------------------------------------------------------------------------------------------------------------------------------------------------------------------------------------------------------------------------------------------------------------------------------------------------------------------------------------------------------------------------------------------------------------------------------------------------------------------------------------------------------------------------------------------------------------------------------------------------------------------------------------------------------------------------------------------------------------------------------------------------------------------------------------------------------------------------------------------------------------------------------------------------------------------------------------------------------------------------------------------------------------------------------------------------------------------------------------------------------------------------------------------------------------------------------------------------------------------------------------------------------------------------------------------------------------------------------------------------------------------------------------------------------------------------------------------------------------------------------------------------------------------------------------------------------------------------------------------------------------------------------------------------------------------------------------------------------------------------------------------------------------------------------------------------------------------------------------------------------------------------------------------------------------------------------------------------------------------------------------------------------------------------------------------------------------------------------------------------------------------------------------------------------------------------------------------------------------------------------------------------------------------------------------------------------------------------------------------------------------------------------------------------------------------------------------------------------------------------------------------------------------------------------------------------------------------------------------------------------------------------------------------------------------------------------------------------------------------------------------------------------------------------------------------------------------------------------------------------------------------------------------------------------------------------------------------------------------------------------------------------------------------------------------------------------------------------------------------------------------------------------------------------------------------------------------------------------------------------------------|

|            |                       |                        |                                                                                                                                                                                                                                                                                                                                                                                                                                                                                                                                                                                                                                                                                                                                                                                                                                                                                                                                                                                                                                                                                                                                                                                                                                                                                                                                                                                                                                                                                                                                                                                                                                                                                                                                                                                                                                                                                                                                                                                                                                                                                                                                                                                                                                                                                                                                                                                                                                                                                                                                                                                                                                                                                                                                                                                                                                                                                                                                                                       |
|------------|-----------------------|------------------------|-----------------------------------------------------------------------------------------------------------------------------------------------------------------------------------------------------------------------------------------------------------------------------------------------------------------------------------------------------------------------------------------------------------------------------------------------------------------------------------------------------------------------------------------------------------------------------------------------------------------------------------------------------------------------------------------------------------------------------------------------------------------------------------------------------------------------------------------------------------------------------------------------------------------------------------------------------------------------------------------------------------------------------------------------------------------------------------------------------------------------------------------------------------------------------------------------------------------------------------------------------------------------------------------------------------------------------------------------------------------------------------------------------------------------------------------------------------------------------------------------------------------------------------------------------------------------------------------------------------------------------------------------------------------------------------------------------------------------------------------------------------------------------------------------------------------------------------------------------------------------------------------------------------------------------------------------------------------------------------------------------------------------------------------------------------------------------------------------------------------------------------------------------------------------------------------------------------------------------------------------------------------------------------------------------------------------------------------------------------------------------------------------------------------------------------------------------------------------------------------------------------------------------------------------------------------------------------------------------------------------------------------------------------------------------------------------------------------------------------------------------------------------------------------------------------------------------------------------------------------------------------------------------------------------------------------------------------------------|
|            |                       |                        | <p>NTN5, ITGA8, NTN4, XRN2, PHLPP1, GPR137B, EPHB1, RP1L1, GRM5, RPS6KA5, PTPRG, NRP1, SDK1, PRKCA, FAIM, ITGA1, RC3H1, NRIP1, CHODL, POR, BCR, NRXN3, KIF16B, SNRK, FBLN1, STK36, MB, RAG1, B9D1, RRAS2, BMPER, CUX1, MACROH2A1, MITF, EPHB2, IGSF3, SGCG, CD38, EYA4, MET, CDH17, SPECC1, PPFA12, CDH13, ATG5, NRAP, MAGI2, KIAA1217, VMP1, UNK, ADAM29, FLRT2, MYB, KALRN, SLC1A2, GNAS, LAMA1, MFHAS1, GREB1L, SERPINB7, CA10, TIAM2, IGSF21, BMP7, ASTN2, DLG5, GABRA2, KIRREL3, BTBD, BPTF, NUDT21, DDX6, ADGRF5, PDGFC, ABL2, TRAPPC6B, NECAB1, EYA1, FHOD3, SLIT2, EXOC4, FAM126A, CCDC141, ERBB4, SYNDIG1, ROBO1, PBX1, PRKCQ, ANTXR1, NDRG1, MYH15, SIPA1L3, NLGN1, CTTNBP2, SHLD2, SLC6A3, ASIC2, EFNA5, TCF12, VCAN, EHMT1, SLIT3, ESR1, NTNG1, KDM4B, LOXL2, NYAP2, PRLR, FOXB1, RAD51B, CAMK1D, PIK3R3, MACROD2, OPCML, FER, EYA2, CCR2, RPGRIP1, STAR, D13, A2M, SEMA4B, ROCK2, PRDM1, RORA, ATAT1, DMRT1, HSPG2, PTPRQ, CSMD3, NCOA6, HSD17B2, COL4A3, RGS7, HOOK3, PCSK2, FSTL4, STK3, ZNF423, ZNF568, HNRNPU, APCDD1, IGF1R, GLI2, THRB, LSAMP, AKAP13, MORC3</p>                                                                                                                                                                                                                                                                                                                                                                                                                                                                                                                                                                                                                                                                                                                                                                                                                                                                                                                                                                                                                                                                                                                                                                                                                                                                                                                                                                                                                                                                                                                                                                                                                                                                                                                                                                                                                                                                                   |
| GO:0032502 | developmental process | 1.1955745654950131e-35 | <p>NOTCH2, BCAR3, BRINP3, MTOR, CNTN4, SPOCK1, SGCD, WWC1, IMP2L, LRP12, PTPRD, FREM1, TRAPPC9, BNC2, NEBL, LRRC4C, SMOC1, MYO9A, ULK2, UNC13C, SCAPER, FTO, MGA, PLCB1, ZNF536, TAF15, SVIL, CLTCL1, ZFPM2, TENM4, NUBPL, DLC1, ZDHHC21, RIPOR2, PDE4D, RDX, RP1, STXBP1, RALA, IL1RAPL2, BCL2, ODAD2, PRDM16, ALDH1A2, ARHGAP26, FBN1, CDH8, CHRNA7, ROBO2, RIMS1, SPIRE1, TENM3, GABRB3, ZEB1, AKR1C3, SDCCAG8, RARB, FGD4, SPRED1, NAV2, ENPEP, SPAG16, MYO1E, PLPPR1, USH2A, MINAR1, CD42EP3, RIMS2, ALK, AUTS2, FOXJ2, CARMIL1, PAPP2, ASTN1, RIN2, PARVB, ANO6, NEGR1, MLLT3, GPC6, CNTNAP2, MAP4, MYO3B, APC, ZMYM4, RBFOX3, PLPPR5, DSCAM, RTN1, TCF4, CRKL, ILDR2, SOX5, SETD2, ERG, ARHGAP24, TNFR, SLC4A10, PTPRJ, OCA2, KDM4C, DOCK10, EGFR, RFX3, ANGPT1, CDK12, MACF1, PRKACB, RNF220, DOCK2, NEDD4, MYOF, SND1, CRB1, BCL11A, SOX6, TMEM182, CEACR2, ARMC2, CHSY1, FLI1, CDH4, ATP2B2, NTRK3, LARGE1, RXFP1, C5, PHACTR1, DKK2, FLT1, DNAJC13, ADAMTS6, GABRB1, PSMA8, EDAR, NEO1, CNTN6, SLC39A12, CABLES1, SLC8A3, PRKD1, PAK1, EPHA7, CHRM3, SPEN, RAPGEF2, LRP2, ADGRB3, DEUP1, RUNX2, ARSB, FGF12, CPS1, TAOK3, ONECUT1, TMEM38B, ADAMTSL1, PRICKLE2, SLC24A3, LDB2, SMYD3, HERC2, LRGUK, GRM7, RETREG1, GHR, LUZP1, EPB41L3, COL4A2, SSBP3, RAPGEF5, TBCD, NEDD4L, ADAM10, HDAC9, ZHX3, APP, ABCB5, RPS6KA2, CACNA1C, DCLK1, STAU2, GABRG2, TMC1, SEMA5A, SYT1, VCL, ARHGAP44, NTF3, AURKA, CFDP1, PYGO1, SLC8A1, HERPUD2, PTPRR, SRGAP2C, FIG4, CMIP, SRGAP2B, KANK1, MAP4K4, ABCD2, BMPR1B, FMN2, THSD7A, PCSK6, AKAP6, CTNNA2, ARNT, PAK3, TTLL7, DIP2B, ITPKB, TRPC5, CHST8, DNM3, NBN, IFT57, RBM47, PRKCZ, CALD1, SNTG2, KLHL1, DIP2A, MSH6, MCPH1, COL27A1, ZSWIM6, HECW1, ABCA5, PHF19, MRTFA, TAF4B, COBL, EBF2, YAP1, ESS2, FRYL, NFIA, RIPK4, SHC4, BRINP1, MAPK1, ADAM22, CRISPLD2, KMT2E, ALCAM, PLG, PDGFD, ZNRF3, ABLIM1, NRG3, NCAM1, GFRA1, SYCP1, NIPBL, RNF17, GABPA, FAT3, LCE1F, CHN1, MYLK3, ACSBG1, FMN1, MBNL1, PAFAH1B1, ATF6, EFEMP1, TLL1, DCAF1, ITGB8, TPM1, NF2, RBFOX1, CTNNA1, PP1R9A, ANKRD11, CDH7, BIRC6, KLF15, PPARA, MEIS2, NFIB, MRTFB, PRTG, SYNJ1, NR5A2, ADAMTS3, TIAM1, FOXJ3, KAZN, ENAH, SF3B6, PCDH11Y, SEMA3C, NAV3, SLC24A4, TMEM108, AGO2, ALPK2, DNAH11, JARID2, SCN2A, GATAD2B, CPE, DYSF, IL34, ANK2, BRWD1, TANC1, ADGRV1, MELK, BCAS3, RYR2, SYNE2, BBS2, WNT9B, SLC9C1, RANBP3L, SEMA6D, ANKS6, SMARCA4, CDH11, LDB3, FABP7, PARD3, MAPKAP1, PIAS1, BLK, TNFR, COL22A1, CXADR, MBD5, ATRX, XIRP2, ELAVL4, ABL1, PTPN12, HDAC4, SLC1A1, PRKAA1, SDC2, GAS2, KCNH1, LRFN5, CRTAC1, DROSHA, TTLL5, L3MBTL3, APLF, DNAH5, CDH18, RAP1A, GLIS1, MORC1, MYO10, CAMK4, FGF10, GRID2, CDHR3, GALC, TGM1, PEAK1, LAT52, NRG1, INO80D, ASPM, AP3B1, RASGRF1, ATP11C, SYNE1, ZBTB16, MUSK, ZNF675, SH3GL3, SETDB2, PGM5, MED15, NXN, USP33, FBN2, CD44, PTPRO, EGF, ALPK3, TRIO, PDE3A, EXT1, COL5A3, LIMD1, SPRED2, ADAMTS2, RPS6KA3, CTNND2, NHS, ATP8A2, PTPN2, PLXNA2, ATXN3, ST8SIA6, HTR2</p> |

|  |  |  |                                                                                                                                                                                                                                                                                                                                                                                                                                                                                                                                                                                                                                                                                                                                                                                                                                                                                                                                                                                                                                                                                                                                                                                                                                                                                                                                                                                                                                                                                                                                                                                                                                                                                                                                                                                                                                                                                                                                                                                                                                                                                                                                                                                                                                                                                                                                                                                                                                                                                                                                                                                                                                                                                                                                                                                                                                                                                                                                                                                                                                                                                                                                                                                                                                                                                                                                                                                                                                                                                                                                                                                                                                                                                                                                                                                                                                                                                                                                                                                                                                                                                                                                                                                                                                                                                                                                                                                                                      |
|--|--|--|----------------------------------------------------------------------------------------------------------------------------------------------------------------------------------------------------------------------------------------------------------------------------------------------------------------------------------------------------------------------------------------------------------------------------------------------------------------------------------------------------------------------------------------------------------------------------------------------------------------------------------------------------------------------------------------------------------------------------------------------------------------------------------------------------------------------------------------------------------------------------------------------------------------------------------------------------------------------------------------------------------------------------------------------------------------------------------------------------------------------------------------------------------------------------------------------------------------------------------------------------------------------------------------------------------------------------------------------------------------------------------------------------------------------------------------------------------------------------------------------------------------------------------------------------------------------------------------------------------------------------------------------------------------------------------------------------------------------------------------------------------------------------------------------------------------------------------------------------------------------------------------------------------------------------------------------------------------------------------------------------------------------------------------------------------------------------------------------------------------------------------------------------------------------------------------------------------------------------------------------------------------------------------------------------------------------------------------------------------------------------------------------------------------------------------------------------------------------------------------------------------------------------------------------------------------------------------------------------------------------------------------------------------------------------------------------------------------------------------------------------------------------------------------------------------------------------------------------------------------------------------------------------------------------------------------------------------------------------------------------------------------------------------------------------------------------------------------------------------------------------------------------------------------------------------------------------------------------------------------------------------------------------------------------------------------------------------------------------------------------------------------------------------------------------------------------------------------------------------------------------------------------------------------------------------------------------------------------------------------------------------------------------------------------------------------------------------------------------------------------------------------------------------------------------------------------------------------------------------------------------------------------------------------------------------------------------------------------------------------------------------------------------------------------------------------------------------------------------------------------------------------------------------------------------------------------------------------------------------------------------------------------------------------------------------------------------------------------------------------------------------------------------------------------|
|  |  |  | <p> C, ARHGEF7, AMBRA1, KDM7A, OPRM1, HTR2A, FANCA, CYP4A11, DA<br/> ZL, CNNM4, KREMEN1, SEMA3E, MARK2, ALPL, FHL2, PUM1, TMOD2,<br/> HERC1, MSH2, IGF2BP3, CDIN1, EPHA6, ANKRD17, APBA2, LINGO2<br/> , SH3KBP1, ATL1, LUC7L, CDKN2C, EPN2, EVC, KNDC1, BICRAL, AF<br/> G3L2, MOSMO, GFRA2, MNAT1, RBBP8, SGCZ, ADAM12, MYLK2, ANK3<br/> , EMILIN2, XYLT1, HMGA2, MYOM2, BCL11B, DOCK5, ECE1, CREM, M<br/> BP, AK8, TRPS1, PLCE1, TGFA, HIP1, CRIM1, FUT9, VAV1, CDH20,<br/> MYT1L, ZNF160, TJP1, LDLRAD4, NPHP4, EGFLAM, PACSIN2, CNTN<br/> 1, HLA-<br/> B, IQSEC1, MTHFD1L, SNX3, PDLIM5, BRCA2, DISC1, DNER, WDPCP<br/> , NRK, SLC10A7, SEMA3A, HSF2BP, CFAP97, ADCY10, STRN, BMP2,<br/> RC3H2, UNC5D, TRAK1, PSG9, PTC2, MSR1, NCAM2, GF11B, MSI2,<br/> BMP2K, RNF38, SEMA3D, ASXL3, PDE6C, RELN, HMGB1, FGF9, NFAT<br/> C2, TDRD7, UST, CPAMD8, RTTN, MDM1, SLC23A2, ANKRD26, ESRP1<br/> , UNC13B, TTC21B, ETS2, DOCK1, B4GALT6, TSPAN2, RAP1GAP, PL<br/> S1, SRGAP2, NIN, DRAXIN, ATF1, SLAMF1, SMARCA2, ETS1, GLI3,<br/> MEGF11, SMARCC1, NHSL1, AFF3, SLC9A4, SMOC2, PCP4, CASP5, C<br/> UL1, MYEF2, ZNF431, RERE, MAP2, DAW1, LAMC1, RRBP1, FARP1,<br/> DRD5, ATF2, HIRA, UMODL1, BBS4, LAMC3, HIVEP3, COL5A1, CFTR<br/> , KPNA1, NELL1, DOP1B, KITLG, DCC, MYT1, RCAN1, GTF2I, RORB,<br/> TADA2A, DAB1, MED27, SELENON, RB1CC1, MYO3A, PRKN, MTMR2, S<br/> H3PXD2A, TBX20, DACH1, PCDH15, ZNF541, DPF3, LGI2, NGEF, GR<br/> IN2A, ARID5B, JPH1, ATXN1, CDH23, PRKCH, TG, IL6R, ALS2, RAC<br/> GAP1, ACO1, TFDP1, HEMGN, DMC1, LCE3B, TOX, PTPRB, CATSPERG<br/> , PDE6A, TBATA, SCN10A, SHANK2, VAV3, MESD, ITS2, SOX30, PT<br/> GFRN, SYBU, ARHGEF28, NPAS2, ADGRG6, YIPF6, SEC24D, ROCK1,<br/> LYN, VCAM1, CTSS, EIF2B3, LRIG1, PLEKHB2, DTX1, TENM2, OVOL<br/> 2, PIWIL3, NTN1, MMP16, ZFXH3, DPYSL5, ARID1B, HOXC13, CRAC<br/> R2A, CASZ1, INSR, DMBT1, YTHDF3, TFF1, HECTD1, SHROOM3, XRC<br/> C4, COLQ, HDAC11, DDHD1, PBX3, SNAI2, ASH1L, HOXC4, SIAH2, T<br/> ANC2, UFD1, RXRG, SP3, MBTPS2, FLNB, TRIM58, TIAL1, ELF2, PL<br/> PP4, NREP, ZDHHC17, NSD2, CERS3, SLC22A14, CD9, CARD10, KRT<br/> 6B, XKR5, JCAD, TWIST2, SAMHD1, IFT81, ENPP1, UTRN, RASGRP1<br/> , DZANK1, NDRG2, BMP5, WDR72, KCNC1, CSF1, GHRH, HDGFL3, BCL<br/> 2L1, SPATA48, KRT25, CTD1, HCN1, PRKG1, LAMA3, ASB4, GRIN2<br/> B, INO80, CNMD, DHRS3, SMAD5, CELF4, SYNJ2, ABCG1, FOXN3, VS<br/> TM4, SLC40A1, PRAME, MYCL, TNN, CABYR, PSAP, MICALL2, MED1,<br/> ATG4B, KDM6A, ATRN, IL33, AJAP1, ROR2, ZNF521, KL, CSDE1, FA<br/> T1, LMX1A, TMEM178A, IL10, ACTR2, SCML2, PRAMEF25, CLSTN2,<br/> TTC39C, PTH, SDF4, SOSTDC1, SOHLH1, PACRG, ABHD2, VSTM2A, M<br/> AP6, VASP, ETV6, TACC2, PALMD, IQGAP1, ZBTB7C, TEAD1, ANP32<br/> B, YBX3, AIMP1, NRXN1, PCID2, HIPK1, FRY, CIBAR1, CACYBP, CA<br/> DM1, PEG10, LMX1B, ANLN, TWIST1, AKT3, ALKAL2, JAK2, ADAM28<br/> , VSX1, FSTL1, ISX, BPNT1, SVEP1, RBM19, CELSR2, ZNF449, CRE<br/> BBP, MELTF, ARL11, GORAB, PCNA, SIAH3, UFL1, ADAMTS5, NFKBI<br/> A, PRKCB, NTM, ABCC8, ANXA4, SMTN, ALX4, USH1C, SMPD4, NEDD9<br/> , OLFM4, ITGA6, ATP2B1, GAP43, ASS1, GRIPI, CTNBL1, ADCY9,<br/> EML1, PPP1R17, MAST2, XKR6, OTOP1, BBS9, EXT2, KRT6A, STOX2<br/> , AGO1, MEOX2, GRXCR1, STAT1, BRMS1L, NR2C1, MAP2K6, CMTM7,<br/> DGKG, SHROOM2, SLC6A11, MTPN, ABI1, MYO18B, ARMC6, PRAMEF2<br/> , POU6F2, IMPACT, CCBE1, ADAMTS18, ITGA4, BCAP29, FBXL17, P<br/> OU1F1, ADCYAP1R1, MTF2, CSMD1, NCAPG2, NDC1, FOXF2, ASB2, M<br/> YOCD, CEP120, DHTKD1, CYFIP2, KRT85, ST8SIA4, MEF2C, ADGRB<br/> 1, RXRA, WNT7A, RBPMS2, MAP3K5, NDFIP1, MAP3K4, WASF3, S100<br/> B, PRDM13, FOXO6, PDE2A, RAB38, FBXW8, SDCBP, NECTIN1, WWOX<br/> , NCK1, FLVCR1, FGR, DRC7, PPP2R3A, DNMBP, TOP1, SPRR2D, RNF<br/> 8, LCE3D, EPHA4, EMP1, GABRA5, MECOM, DNMT3L, NTRK2, IL1RAP<br/> L1, FNDC3A, RSPH1, NUMB, LHX9, ADAMTS9, WNT2B, TNNT1, POSTN<br/> , CD101, SHISA6, MEGF10, IL17RD, FBXO31, GRIK1, PRKAB1, IRE<br/> B2, HS6ST1, PTK2, MARK4, CDH5, ANKRD6, NFKBID, ARHGAP12, CL<br/> DN18, DIAPH1, FEZ2, LAMB1, CYFIP1, UBE3A, HOATZ, PCDH8, SEM<br/> A4D, JAM2, FRMD6, FAT4, LRMDA, AP2B1, RUNX1, AKR1B1, WNT5B,<br/> AMFR, SANBR, ASAP1, FCRLA, DPY19L2, SORBS2, PDCL3, CCDC88A<br/> , GPR55, NSUN2, ADAMTS16, SPAG6, BICD1, TNFSF11, FYN, MYL12<br/> B, NLRP14, ADGRL2, UNC45B, ARL13B, HYDIN, UHRF2, SCN8A, HDA<br/> C2, GON4L, TBX15, NCS1, COL18A1, CDH9, LHFPL2, ATP5PF, DOK5 </p> |
|--|--|--|----------------------------------------------------------------------------------------------------------------------------------------------------------------------------------------------------------------------------------------------------------------------------------------------------------------------------------------------------------------------------------------------------------------------------------------------------------------------------------------------------------------------------------------------------------------------------------------------------------------------------------------------------------------------------------------------------------------------------------------------------------------------------------------------------------------------------------------------------------------------------------------------------------------------------------------------------------------------------------------------------------------------------------------------------------------------------------------------------------------------------------------------------------------------------------------------------------------------------------------------------------------------------------------------------------------------------------------------------------------------------------------------------------------------------------------------------------------------------------------------------------------------------------------------------------------------------------------------------------------------------------------------------------------------------------------------------------------------------------------------------------------------------------------------------------------------------------------------------------------------------------------------------------------------------------------------------------------------------------------------------------------------------------------------------------------------------------------------------------------------------------------------------------------------------------------------------------------------------------------------------------------------------------------------------------------------------------------------------------------------------------------------------------------------------------------------------------------------------------------------------------------------------------------------------------------------------------------------------------------------------------------------------------------------------------------------------------------------------------------------------------------------------------------------------------------------------------------------------------------------------------------------------------------------------------------------------------------------------------------------------------------------------------------------------------------------------------------------------------------------------------------------------------------------------------------------------------------------------------------------------------------------------------------------------------------------------------------------------------------------------------------------------------------------------------------------------------------------------------------------------------------------------------------------------------------------------------------------------------------------------------------------------------------------------------------------------------------------------------------------------------------------------------------------------------------------------------------------------------------------------------------------------------------------------------------------------------------------------------------------------------------------------------------------------------------------------------------------------------------------------------------------------------------------------------------------------------------------------------------------------------------------------------------------------------------------------------------------------------------------------------------------------------------------|

|            |                    |                      |                                                                                                                                                                                                                                                                                                                                                                                                                                                                                                                                                                                                                                                                                                                                                                                                                                                                                                                                                                                                                                                                                                                                                                                                                                                                                                                                                                                                                                                                                                                                                                                                                                                                                                                                                                                                                                                                                                                                                                                                                                                                                                                                                                                                                                                                                                              |
|------------|--------------------|----------------------|--------------------------------------------------------------------------------------------------------------------------------------------------------------------------------------------------------------------------------------------------------------------------------------------------------------------------------------------------------------------------------------------------------------------------------------------------------------------------------------------------------------------------------------------------------------------------------------------------------------------------------------------------------------------------------------------------------------------------------------------------------------------------------------------------------------------------------------------------------------------------------------------------------------------------------------------------------------------------------------------------------------------------------------------------------------------------------------------------------------------------------------------------------------------------------------------------------------------------------------------------------------------------------------------------------------------------------------------------------------------------------------------------------------------------------------------------------------------------------------------------------------------------------------------------------------------------------------------------------------------------------------------------------------------------------------------------------------------------------------------------------------------------------------------------------------------------------------------------------------------------------------------------------------------------------------------------------------------------------------------------------------------------------------------------------------------------------------------------------------------------------------------------------------------------------------------------------------------------------------------------------------------------------------------------------------|
|            |                    |                      | ,UGP2,MAPK9,CRTAM,COL19A1,APELA,MDGA2,ROR1,FUT8,TET1,ARNT2,HECW2,CDH2,CNTN5,ITGA8,NTN4,XRN2,PHLPP1,GPR137B,EPHB1,EYS,RP1L1,GRM5,DDX10,ADCK1,RAI14,RPS6KA5,PTPRG,PID1,NRP1,SDK1,PRKCA,FAIM,ITGA1,RC3H1,NRIP1,CHODL,POR,BCR,TUT4,NRXN3,KIF16B,CDH12,SNRK,C14ORF39,FBLN1,STK36,PAQR5,MB,RAG1,B9D1,DGCR2,RRAS2,BMPER,CUX1,MACROH2A1,MITF,EPHB2,IGSF3,SGCG,CD38,EYA4,MET,CDH17,SPECC1,PPFIA2,CDH13,ATG5,NRAP,MAGI2,KIAA1217,VMPI,UNK,FAM171A1,ADAM29,FLRT2,MYB,KALRN,SLC1A2,GNAS,LAMA1,MFHAS1,GREB1L,SERPINB7,CA10,CPQ,ATRN1,TIAM2,IGSF21,BMP7,ASTN2,DLG5,GABRA2,KIRREL3,BTD,BPTF,NUDT21,DDX6,ADGRF5,PDGFC,ABL2,TRAPPC6B,RFX2,NECAB1,EYA1,FHOD3,SLIT2,EXOC4,FAM126A,CCDC141,ERBB4,SYNDIG1,ROBO1,PBX1,PRKCQ,ANTXR1,NDRG1,MYH15,SIPA1L3,MGMT,NLG1,CTTNBP2,SHLD2,NOS1,SLC6A3,ASIC2,EFNA5,TCF12,VCAN,RAB27A,EHMT1,SLIT3,ESR1,NTNG1,KDM4B,LOXL2,NYAP2,PRLR,FOX1B,RAD51B,CAMK1D,PIK3R3,MACROD2,CFAP44,OPCML,CATSPERE,FER,EYA2,CCR2,RPGRIP1,STARD13,A2M,EPS8,SEMA4B,PHC2,ROCK2,PRDM1,RORA,ATAT1,DMRT1,CATSPER2,HSPG2,PTPRQ,CSMD3,NCOA6,HSD17B2,COL4A3,RGS7,HOK3,PCSK2,FSTL4,PNPLA3,STK3,ZNF423,ZNF568,HNRNP,APCDD1,IGF1R,GLI2,THRB,LSAMP,AKAP13,MORC3,ATP10A,SEPTIN6,DNM1L                                                                                                                                                                                                                                                                                                                                                                                                                                                                                                                                                                                                                                                                                                                                                                                                                                                                                                                                                                                                                                                                                                                                               |
| GO:0048731 | system development | 4.14682928730004e-34 | NOTCH2,BCAR3,BRINP3,MTOR,CNTN4,SPOCK1,SGCD,IMMP2L,LRP12,PTPRD,FREM1,TRAPPC9,BNC2,NEBL,LRR4C,SMOC1,MYO9A,ULK2,SCAPER,PLCB1,ZNF536,TAF5,ZFP2,TENM4,DLC1,RIPOR2,RP1,STXBP1,RALA,IL1RAPL2,BCL2,ODAD2,ALDH1A2,ARHGAP26,FBN1,CHRNA7,ROBO2,RIMS1,TENM3,GABRB3,ZEB1,AKR1C3,SDCCAG8,RARB,SPRED1,NAV2,ENPEP,MYO1E,PLPPR1,USH2A,MINAR1,RIMS2,ALK,AUTS2,FOXJ2,PAPPA2,ASTN1,RIN2,NEGR1,MLLT3,GPC6,CNTNAP2,MAP4,APC,RBFOX3,PLPPR5,DESCAM,RTN1,TCF4,CRKL,SOX5,SETD2,ARHGAP24,TNIK,SLC4A10,PTPRJ,DOCK10,EGFR,RFX3,ANGPT1,MACF1,PRKACB,RNF220,DOCK2,NEDD4,CRB1,BCL11A,SOX6,CECR2,CHSY1,FLI1,CDH4,ATP2B2,NTRK3,RXFP1,C5,PHACTR1,FLT1,ADAMTS6,GABRB1,EDAR,NEO1,CNTN6,SLC39A12,CABLES1,SLC8A3,PRKD1,PAK1,EPHA7,CHRM3,SPEN,RAPGEF2,LRP2,ADGRB3,RUNX2,ARSB,FGF12,CPS1,TAOK3,ONECUT1,TMEM38B,ADAMTSL1,LDB2,GRM7,GHR,LUZP1,EPB41L3,COL4A2,SSBP3,RAPGEF5,TBCD,NEDD4L,ADAM10,HDAC9,APP,ABC5,RPS6KA2,CACNA1C,DCLK1,STAU2,GABRG2,TMC1,SEMA5A,SYT1,VCL,ARHGAP44,NTF3,AURKA,PYGO1,SLC8A1,SRGAP2C,FIG4,SRGAP2B,KANK1,MAP4K4,ABCD2,BMP1B,THSD7A,AKAP6,CTNNA2,ARNT,PAK3,TTL2,DIP2B,ITPKB,TRPC5,CHST8,DNM3,NBN,IFT57,RBM47,PRKCZ,CALD1,SNTG2,KLHL1,DIP2A,MSH6,MCPH1,COL27A1,ZSWIM6,HECW1,COBL,YAP1,ESS2,FRYL,NFIA,BRINP1,MAPK1,ADAM22,CRISPLD2,KMT2E,ALCAM,PLG,PDGFD,NRG3,NCAM1,GFRA1,NIPBL,GABPA,FAT3,CHN1,MYLK3,ACSBG1,FMN1,MBNL1,PAFAH1B1,ATF6,EFEMP1,TLL1,DCAF1,ITGB8,TPM1,NF2,RBFOX1,CTNNA1,PPP1R9A,ANKRD11,KLF15,PPARA,MEIS2,NFIB,PRTG,SYNJ1,TIAM1,ENAH,SEMA3C,NAV3,SLC24A4,TMEM108,AGO2,ALPK2,DNAH11,JARID2,SCN2A,CPE,IL34,ANK2,ADGRV1,MELK,BCAS3,RYR2,SYNE2,BBS2,WNT9B,RANBP3L,SEMA6D,ANKS6,SMARCA4,CDH11,LDB3,FABP7,PARD3,MAPKAP1,BLK,TNR,COL22A1,CXADR,MDB5,ATRX,XIRP2,ELAVL4,ABL1,HDAC4,SLC1A1,SDC2,GAS2,LRFN5,CRTAC1,DROSHA,TTL5,L3MBTL3,APLF,DNAH5,RAP1A,CAMK4,FGF10,GRID2,GALC,NRG1,ASPM,AP3B1,RASGRF1,ATP11C,ZBTB16,MUSK,ZNF675,SH3GL3,SETDB2,NXN,USP33,FBN2,CD44,PTPRO,EGF,ALPK3,TRIO,EXT1,SPRED2,ADAMTS2,RPS6KA3,CTNND2,NHS,ATP8A2,PTPN2,PLXNA2,ATXN3,ARHGEF7,AMBRA1,KDM7A,OPRM1,FANCA,CYP4A11,KREMEN1,SEMA3E,MARK2,ALPL,FHL2,TMOD2,HERC1,MSH2,IGF2BP3,CDIN1,EPHA6,ANKRD17,APBA2,LINGO2,ATL1,CDKN2C,EPN2,EVC,KNDC1,AFG3L2,MOSMO,GFR2,MNAT1,SGCZ,ADAM12,MYLK2,ANK3,EMILIN2,XYLT1,HMGA2,BCL11B,ECE1,MBP,AK8,TRPS1,PLCE1,TGFA,CRIM1,FUT9,VA1,MYT1L,ZNF160,TJP1,NPHP4,CNTN1,HLA-B,IQSEC1,MTHFD1L,SNX3,PDLIM5,BCA2,DISC1,DNER,WPCP |

|            |                  |                        |                                                                                                                                                                                                                                                                                                                                                                                                                                                                                                                                                                                                                                                                                                                                                                                                                                                                                                                                                                                                                                                                                                                                                                                                                                                                                                                                                                                                                                                                                                                                                                                                                                                                                                                                                                                                                                                                                                                                                                                                                                                                                                                                                                                                                                                                                                                                                                                                                                                                                                                                                                                                                                                                                                                                                                                                                                                                                                |
|------------|------------------|------------------------|------------------------------------------------------------------------------------------------------------------------------------------------------------------------------------------------------------------------------------------------------------------------------------------------------------------------------------------------------------------------------------------------------------------------------------------------------------------------------------------------------------------------------------------------------------------------------------------------------------------------------------------------------------------------------------------------------------------------------------------------------------------------------------------------------------------------------------------------------------------------------------------------------------------------------------------------------------------------------------------------------------------------------------------------------------------------------------------------------------------------------------------------------------------------------------------------------------------------------------------------------------------------------------------------------------------------------------------------------------------------------------------------------------------------------------------------------------------------------------------------------------------------------------------------------------------------------------------------------------------------------------------------------------------------------------------------------------------------------------------------------------------------------------------------------------------------------------------------------------------------------------------------------------------------------------------------------------------------------------------------------------------------------------------------------------------------------------------------------------------------------------------------------------------------------------------------------------------------------------------------------------------------------------------------------------------------------------------------------------------------------------------------------------------------------------------------------------------------------------------------------------------------------------------------------------------------------------------------------------------------------------------------------------------------------------------------------------------------------------------------------------------------------------------------------------------------------------------------------------------------------------------------|
|            |                  |                        | <p>,NRK,SLC10A7,SEMA3A,STRN,BMP2,RC3H2,UNC5D,TRAK1,PSG9,PTCD2,NCAM2,GFI1B,RNF38,SEMA3D,PDE6C,RELN,HMGB1,FGF9,NFATC2,TDRD7,UST,CPAMD8,MDM1,SLC23A2,ESRP1,TTC21B,ETS2,DOCK1,B4GALT6,TSPAN2,RAP1GAP,PLS1,SRGAP2,NIIN,DRAXIN,ATF1,SLAMF1,SMARCA2,ETS1,GLI3,MEGF11,SMARCC1,SMOC2,PCP4,CASP5,MYEF2,RERE,MAP2,DAW1,FARP1,ATF2,UMODL1,BBS4,LAMC3,COL5A1,NELL1,KITLG,DCC,MYT1,GTF2I,RORB,DAB1,SELENON,RB1CC1,PRKN,MTMR2,SH3PXD2A,TBX20,PCDH15,DPF3,LGI2,NGEF,GRIN2A,ARID5B,ATXN1,CDH23,PRKCH,TG,IL6R,ALS2,RACGAP1,DMC1,TOX,PTPRB,PDE6A,SHANK2,VAV3,ITSN2,SYBU,NPAS2,ADGRG6,YIPF6,ROCK1,LYN,VCAM1,EIF2B3,LRIG1,DTX1,TENM2,OVOL2,NTN1,MMP16,ZFXH3,DYSL5,ARID1B,CRACR2A,CASZ1,INSR,HECTD1,SHROOM3,XRCC4,COLQ,HDAC11,PBX3,SNAI2,ASH1L,HOXC4,TANC2,UFD1,RXRG,SP3,MBTPS2,TRIM58,NREP,ZDHHC17,NSD2,CD9,CARD10,JCAD,SAMHD1,RASGRP1,DZANK1,NDRG2,BMP5,KCNC1,CSF1,GHRH,HDGFL3,BCL2L1,CTDP1,HCN1,PRKG1,LAMA3,ASB4,GRIN2B,CNMD,DHRS3,SMAD5,CELF4,SYNJ2,FOXN3,VSTM3,SLC40A1,MYCL,TNN,PSAP,MICALL2,MED1,KDM6A,ATRN,IL33,ROR2,ZNF521,CSDE1,FAT1,LMX1A,TMEM178A,IL10,ACTR2,CLSTN2,PTH,MAP6,VASP,ETV6,TACC2,IQGAP1,ANP32B,YBX3,AIMP1,NRXN1,PCID2,HIPK1,FRY,CACYBP,CADM1,LMX1B,ANLN,TWIST1,AKT3,ALKAL2,JAK2,VSX1,ISX,BPNT1,SVEP1,CELSR2,ARL11,GORAB,PCNA,UFL1,NFKBIA,PRKCB,NTM,ABCC8,ALX4,USH1C,NEDD9,ITGA6,ATP2B1,GAP43,ASS1,GRIP1,CTNBL1,EML1,PPP1R17,EXT2,AGO1,MEOX2,GRXCR1,STAT1,MAP2K6,CMTM7,DGKG,SHROOM2,SLC6A11,MTPN,ABI1,MYO18B,ARMC6,POU6F2,IMPACT,CCBE1,ADAMTS18,ITGA4,FBXL17,POU1F1,CSMD1,NCAPG2,FOXP2,ASB2,MYOCD,CEP120,DHTKD1,CYFIP2,ST8SIA4,MEF2C,ADGRB1,WNT7A,RBPMS2,NDFIP1,WASF3,S100B,PRDM13,FOXO6,PDE2A,FBXW8,SDCBP,NECTIN1,WWOX,NCK1,FLVCR1,FGR,PPP2R3A,RNF8,EPHA4,GABRA5,MECOM,NTRK2,IL1RAPL1,FNDC3A,NUMB,LHX9,ADAMTS9,WNT2B,TNNI1,CD101,FBXO31,GRIK1,IREB2,HS6ST1,PTK2,MARK4,CDH5,NFKBID,CLDN18,FEZ2,LAMB1,CYFIP1,UBE3A,SEMA4D,JAM2,FAT4,AP2B1,RUNX1,AKR1B1,WNT5B,SANBR,ASAP1,SORBS2,PDCL3,CCDC88A,GPR55,ADAMTS16,SPAG6,TNFSF11,FYN,ADGRL2,UNC45B,ARL13B,HYDIN,SCN8A,HDAC2,GON4L,TBX15,NCS1,COL18A1,ATP5PF,DOK5,UGP2,CRTAM,COL19A1,APELA,MDGA2,ROR1,ARNT2,HECW2,CDH2,CNTN5,ITGA8,NTN4,XRN2,PHLPP1,GPR137B,EPHB1,RP1L1,GRM5,RPS6KA5,PTPRG,NRP1,SDK1,PRKCA,FAIM,ITGA1,RC3H1,NRIP1,CHODL,POR,BCR,NRXN3,SNRK,STK36,MB,RAG1,B9D1,RRAS2,BMPER,CUX1,MITF,EPHB2,IGSF3,SGCG,CD38,MET,CDH17,PPFIA2,CDH13,ATG5,NRAP,MAGI2,KIAA1217,UNK,ADAM29,FLRT2,MYB,KALRN,SLC1A2,GNAS,LAMA1,MFHAS1,GREB1L,SERPINB7,CA10,TIAM2,IGSF21,BMP7,ASTN2,DLG5,GABRA2,KIRREL3,BTD,BPTF,NUDT21,DDX6,ADGRF5,PDGFC,ABL2,TRAPPC6B,EYA1,FHOD3,SLIT2,FAM126A,CCDC141,ERBB4,SYNDIG1,ROBO1,PBX1,PRKCQ,ANTXR1,NDRG1,MYH15,SIPA1L3,NLGN1,CTTNBP2,SHLD2,SLC6A3,ASIC2,EFNA5,TCF12,VCAN,SLIT3,ESR1,NTNG1,KDM4B,LOXL2,NYAP2,PRLR,FOXB1,CAMK1D,PIK3R3,MACROD2,OPCML,FER,CCR2,RPGRIP1,STARD13,A2M,SEMA4B,ROCK2,PRDM1,RORA,ATAT1,DMRT1,HSPG2,PTPRQ,CSMD3,NCOA6,COL4A3,RGS7,HOK3,PCSK2,FSTL4,STK3,ZNF423,HNRNPU,APCDD1,IGF1R,GLI2,THRB,LSAMP,AKAP13</p> |
| GO:0048468 | cell development | 2.2111424083656914e-32 | <p>NOTCH2,MTOR,CNTN4,SPOCK1,SGCD,LRP12,PTPRD,NEBL,LRRC4C,MYO9A,ULK2,PLCB1,TENM4,ZDHHC21,RIPOR2,PDE4D,RDX,RP1,STXBP1,BCL2,ALDH1A2,FBN1,CHRNA7,ROBO2,RIMS1,TENM3,RARB,SPAG16,MYO1E,USH2A,MINAR1,RIMS2,ALK,AUTS2,CARMIL1,PARVB,NEGR1,CNTNAP2,MAP4,PLPPR5,DSCAM,CRKL,SETD2,TNIK,SLC4A10,OCA2,DOCK10,RFX3,MACF1,RNF220,NEDD4,MYOF,CRB1,BCL11A,TMEM182,CECR2,ARMC2,CHSY1,FLI1,CDH4,NTRK3,PHACTR1,GABRB1,NEO1,CNTN6,SLC39A12,PRKD1,PAK1,EPHA7,SPEN,RAPGEF2,LRP2,ADGRB3,RUNX2,ARSB,TAK3,ONECUT1,ADAMTSL1,SMYD3,GRM7,EPB41L3,TBCD,NEDD4L,HDAC9,APP,RPS6KA2,DCLK1,STAU2,TMC1,SEMA5A,SYT1,VCL,</p>                                                                                                                                                                                                                                                                                                                                                                                                                                                                                                                                                                                                                                                                                                                                                                                                                                                                                                                                                                                                                                                                                                                                                                                                                                                                                                                                                                                                                                                                                                                                                                                                                                                                                                                                                                                                                                                                                                                                                                                                                                                                                                                                                                                                                                                                                                        |



|            |                 |                       |                                                                                                                                                                                                                                                                                                                                                                                                                                                                                                                                                                                                                                                                                                                                                                                                                                                                                                                                                                                                                                                                                                                                                                                                                                                                                                                                                                                                                                                                                                                                                                                                                                                                                                                                                                                                                                                                                                                                                                                                                                                                                                                                                                                                                                                                                                                                                                                                                                                                                                                                                                                                                                                                                                                                                                                     |
|------------|-----------------|-----------------------|-------------------------------------------------------------------------------------------------------------------------------------------------------------------------------------------------------------------------------------------------------------------------------------------------------------------------------------------------------------------------------------------------------------------------------------------------------------------------------------------------------------------------------------------------------------------------------------------------------------------------------------------------------------------------------------------------------------------------------------------------------------------------------------------------------------------------------------------------------------------------------------------------------------------------------------------------------------------------------------------------------------------------------------------------------------------------------------------------------------------------------------------------------------------------------------------------------------------------------------------------------------------------------------------------------------------------------------------------------------------------------------------------------------------------------------------------------------------------------------------------------------------------------------------------------------------------------------------------------------------------------------------------------------------------------------------------------------------------------------------------------------------------------------------------------------------------------------------------------------------------------------------------------------------------------------------------------------------------------------------------------------------------------------------------------------------------------------------------------------------------------------------------------------------------------------------------------------------------------------------------------------------------------------------------------------------------------------------------------------------------------------------------------------------------------------------------------------------------------------------------------------------------------------------------------------------------------------------------------------------------------------------------------------------------------------------------------------------------------------------------------------------------------------|
|            |                 |                       | <p> ARHGAP44, NTF3, AURKA, PYGO1, SLC8A1, SRGAP2C, FIG4, KANK1, MAP4K4, BMPR1B, FMN2, AKAP6, CTNNA2, PAK3, DIP2B, TRPC5, DNM3, PRKCZ, KLHL1, DIP2A, COL27A1, HECW1, TAF4B, COBL, YAP1, FRYL, BRINP1, MAPK1, ADAM22, ALCAM, NCAM1, GFRA1, SYCP1, RNF17, FAT3, CHN1, MYLK3, PAFAH1B1, TPM1, NF2, CTNNA1, PPP1R9A, PPARA, NFIB, PRTG, SYNJ1, TIAM1, ENAH, SEMA3C, TMEM108, ALPK2, DYSF, IL34, ANK2, ADGRV1, BBS2, SEMA6D, CDH11, LDB3, PARD3, BLK, TNR, COL22A1, CXADR, ATRX, ELAVL4, ABL1, HDAC4, SDC2, CRTAC1, L3MBTL3, RAP1A, GRID2, PEAK1, LATS2, NRG1, ASPM, RASGRF1, ZBTB16, PGM5, USP33, PTPRO, ALPK3, TRIO, PDE3A, EXT1, LIMD1, CTNND2, ATP8A2, PLXNA2, ARHGEF7, OPRM1, DAZL, KREMEN1, SEMA3E, MARK2, FHL2, TMOD2, HERC1, MSH2, EPHA6, ATL1, KNDC1, AFG3L2, SGCZ, ANK3, MYOM2, BCL11B, DOCK5, ECE1, MBP, FUT9, MYT1L, TJP1, NPHP4, CNTN1, IQSEC1, SNX3, PDLIM5, BRCA2, DISC1, DNER, WDPCP, NRK, SEMA3A, STRN, BMP2, UNC5D, PTC2, NCAM2, MSI2, SEMA3D, PDE6C, RELN, HMGB1, NFATC2, TDRD7, UST, SLC23A2, DOCK1, B4GALT6, TSPAN2, PLS1, SRGAP2, NIN, DRAXIN, ATF1, SMARCA2, GLI3, SLC9A4, RERE, MAP2, LAMC1, FARP1, TDRD5, BBS4, LAMC3, CFTR, KITLG, DCC, RCAN1, RORB, DAB1, SELENON, PRKN, MTMR2, TBX20, PCDH15, NGEF, ARID5B, CDH23, PRKCH, ALS2, DMC1, TOX, ITSN2, SOX30, ADGRG6, YIPF6, ROCK1, LYNN, EIF2B3, TENM2, OVOL2, NTN1, DPYSL5, SHROOM3, HDAC11, PBX3, SNAI2, TANC2, FLNB, TRIM58, TIAL1, NREP, ZDHHC17, SLC22A14, IFT81, DZANK1, BMP5, HDGFL3, BCL2L1, CTDP1, HCN1, PRKG1, LAMA3, SMAD5, CELF4, TNN, CABYR, MICALL2, MED1, ATRN, IL33, ROR2, FAT1, LMX1A, ACTR2, SOHLH1, PACRG, ABHD2, MAP6, VASP, IQGAP1, YBX3, NRXN1, FRY, TWIST1, ALKAL2, JAK2, VSX1, CELSR2, MELTF, UFL1, NTM, ABCC8, USH1C, NEDD9, OLFM4, ITGA6, GAP43, GRIP1, GRXCR1, DGKG, ABI1, MYO18B, IMPACT, ITGA4, ASB2, CYFIP2, MEF2C, ADGRB1, WNT7A, WASF3, S100B, FOXO6, PDE2A, FBXW8, NECTIN1, NCK1, FLVCR1, DRC7, RNF8, EPHA4, GABRA5, NTRK2, IL1RAPL1, FNDC3A, RSPH1, NUMB, LHX9, MEGF10, FBXO31, HSS6ST1, PTK2, CDH5, CLDN18, FEZ2, LAMB1, CYFIP1, UBE3A, SEMA4D, JAM2, FRMD6, FAT4, RUNX1, AKR1B1, WNT5B, ASAP1, DPY19L2, SORBS2, CCDC88A, NSUN2, SPAG6, TNFSF11, FYN, ARL13B, HYDIN, HDAC2, NCS1, COL18A1, ROR1, HECW2, CDH2, CNTN5, ITGA8, NTN4, EPHB1, RP1L1, GRM5, RPS6KA5, PTPRG, NRP1, SDK1, FAIM, ITGA1, CHODL, TUT4, NRXN3, C14ORF39, FBLN1, PAQR5, CUX1, EPHB2, CD38, MET, PPFIA2, ATG5, NRAP, MAGI2, UNK, FLRT2, MYB, KALRN, LAMA1, ATRNL1, TIAM2, BMP7, DLG5, KIRREL3, ADGRF5, ABL2, RFX2, FHOD3, SLIT2, CCDC141, ERBB4, ROBO1, PBX1, PRKCQ, ANTXR1, NDRG1, SIPA1L3, NLGN1, EFNA5, SLIT3, ESR1, NTNG1, NYAP2, FOXB1, CAMK1D, CFAP44, OPCML, CATSPERE, FER, RRGRIPI, SEMA4B, ROCK2, PRDM1, ATAT1, DMRT1, CATSPER2, PTPRQ, CSMD3, HOOK3, FSTL4, HNRNPU, IGF1R, GLI2, THRB, AKAP13 </p> |
| GO:0022008 | neurogenesis is | 5.200148498154413e-32 | <p> NOTCH2, BRINP3, MTOR, CNTN4, SPOCK1, LRP12, PTPRD, TRAPPC9, LRRRC4C, MYO9A, ULK2, ZNF536, TENM4, RIPOR2, RP1, STXBP1, BCL2, ALDH1A2, CHRNA7, ROBO2, RIMS1, TENM3, ZEB1, SDCCAG8, RARB, NAV2, USH2A, MINAR1, RIMS2, ALK, AUTS2, ASTN1, NEGR1, CNTNAP2, MAP4, PLPPR5, DSCAM, RTN1, TCF4, CRKL, SOX5, TNK1, SLC4A10, DOCK10, MACF1, RNF220, NEDD4, CRB1, BCL11A, SOX6, CECR2, CDH4, ATP2B2, NTRK3, PHACTR1, GABRB1, NEO1, CNTN6, SLC39A12, SLC8A3, PRKD1, PAK1, EPHA7, SPEN, RAPGEF2, LRP2, ADGRB3, RUNX2, ARSB, TAOK3, ADAMTSL1, GRM7, EPB41L3, TBCD, NEDD4L, HDAC9, APP, DCLK1, STAU2, TMC1, SEMA5A, SYT1, VCL, ARHGAP44, NTF3, AURKA, SRGAP2C, FIG4, KANK1, MAP4K4, BMPR1B, CTNNA2, PAK3, DIP2B, TRPC5, DNM3, PRKCZ, KLHL1, DIP2A, ZSWIM6, HECW1, COBL, YAP1, FRYL, BRINP1, MAPK1, ADAM22, ALCAM, NRG3, NCAM1, GFRA1, NIPBL, FAT3, CHN1, PAFAH1B1, NF2, CTNNA1, PPP1R9A, KLF15, NFIB, PRTG, SYNJ1, TIAM1, ENAH, SEMA3C, NAV3, TMEM108, IL34, ADGRV1, SYNE2, WNT9B, SEMA6D, CDH11, PARD3, BLK, TNR, ELAVL4, ABL1, SLC1A1, SDC2, CRTAC1, RAP1A, FGF10, GRID2, NRG1, ASPM, RASGRF1, SH3GL3, USP33, PTPRO, TRIO, EXT1, CTNND2, ATP8A2, PLXNA2, OPRM1, KREMEN1, SEMA3E, MARK2, HERC1, EPHA6, ATL1, CDKN2C, KNDC1, AFG3L2, MOSMO, ANK3, BCL11B, ECE1, MBP, FUT9, MYT1L, NPHP4, CNTN1, IQSEC1, SNX3, PD </p>                                                                                                                                                                                                                                                                                                                                                                                                                                                                                                                                                                                                                                                                                                                                                                                                                                                                                                                                                                                                                                                                                                                                                                                                                                                                                                                                                                                                                                                                           |

|            |                              |                       |                                                                                                                                                                                                                                                                                                                                                                                                                                                                                                                                                                                                                                                                                                                                                                                                                                                                                                                                                                                                                                                                                                                                                                                                                                                                                                                                                                                                                                                                                                                                                                                                                                                                                                                                                                                                                     |
|------------|------------------------------|-----------------------|---------------------------------------------------------------------------------------------------------------------------------------------------------------------------------------------------------------------------------------------------------------------------------------------------------------------------------------------------------------------------------------------------------------------------------------------------------------------------------------------------------------------------------------------------------------------------------------------------------------------------------------------------------------------------------------------------------------------------------------------------------------------------------------------------------------------------------------------------------------------------------------------------------------------------------------------------------------------------------------------------------------------------------------------------------------------------------------------------------------------------------------------------------------------------------------------------------------------------------------------------------------------------------------------------------------------------------------------------------------------------------------------------------------------------------------------------------------------------------------------------------------------------------------------------------------------------------------------------------------------------------------------------------------------------------------------------------------------------------------------------------------------------------------------------------------------|
|            |                              |                       | <p>LIM5,DISC1,DNER,WDPCP,NRK,SEMA3A,STRN,BMP2,UNC5D,TRAK1,NCAM2,SEMA3D,PDE6C,RELN,HMGB1,UST,SLC23A2,ESRP1,TTC21B,B4GALT6,TSPAN2,RAP1GAP,PLS1,SRGAP2,NIN,DRAXIN,ATF1,GLI3,PCP4,MYEF2,RERE,MAP2,FARP1,BBS4,LAMC3,DCC,RORB,DAB1,PRKN,MTMR2,TBX20,PCDH15,NGEF,GRIN2A,CDH23,PRKCH,ALS2,RACGAP1,TOX,PTPRB,ITSN2,ADGRG6,ROCK1,LYN,VCAM1,EIF2B3,DTX1,TENM2,NTN1,ZFH3,DYSL5,CASZ1,HDAC11,PBX3,TANC2,RXRG,NREP,ZDHC17,CD9,DZANK1,BMP5,CSF1,HDGFL3,HCN1,PRKG1,LAMA3,MYCL,TNN,MICALL2,MEED1,IL33,ROR2,ZNF521,LMX1A,ACTR2,MAP6,VASP,ETV6,IQGA1,NRXN1,HIPK1,FRY,LMX1B,TWIST1,ALKAL2,JAK2,VSX1,CELSR2,UFL1,NTM,ABCC8,USH1C,ITGA6,GAP43,GRIP1,EML1,GRXCR1,DGKG,MTPN,ABI1,IMPACT,ITGA4,CEP120,CYFIP2,MEF2C,ADGRB1,WNT7A,WASF3,S100B,PRDM13,FOXO6,FBXW8,NECTIN1,NCK1,PPP2R3A,EPHA4,GABRA5,NTRK2,IL1RAPL1,NUMB,LHX9,WNT2B,FBXO31,HS6ST1,PTK2,FEZ2,LAMB1,CYFIP1,UBE3A,SEMA4D,FAT4,RUNX1,WNT5B,ASAP1,CCDC88A,SPAG6,FYN,HDAC2,NCS1,DOK5,MDGA2,ROR1,HECW2,CDH2,CNTN5,NTN4,EPHB1,RPIL1,GRM5,RPS6KA5,PTPRG,NRP1,SDK1,FAIM,ITGA1,CHODL,NRXN3,RRAS2,CUX1,EPHB2,CD38,MET,PPFIA2,MAGI2,UNK,FLRT2,KALRN,LAMA1,TIAM2,BMP7,ASTN2,DLG5,KIRREL3,DDX6,ABL2,EYA1,SLIT2,CCDC141,ERBB4,ROBO1,PBX1,PRKCQ,NDRG1,NLGN1,EFNA5,TCF12,VCAN,SLIT3,NTNG1,NYAP2,FOXB1,CAMK1D,OPCML,CCR2,RPGRI1,SEMA4B,PRDM1,RORA,ATAT1,PTPRQ,CSMD3,HOK3,FSTL4,APCDD1,IGF1R,GLI2,THRB</p>                                                                                                                                                                                                                                                                                                                                                                                                                                                                                           |
| GO:0048666 | neuron development           | 6.614732768681943e-31 | <p>NOTCH2,CNTN4,SPOCK1,LRP12,PTPRD,LRR4C,MYO9A,ULK2,TENM4,RIPOR2,RP1,STXBP1,BCL2,CHRNA7,ROBO2,RIMS1,TENM3,MINAR1,RIMS2,ALK,AUTS2,NEGR1,CNTNAP2,MAP4,PLPPR5,DSCAM,CRKL,TNIK,SLC4A10,DOCK10,MACF1,RNF220,NEDD4,CRB1,BCL11A,CECR2,CDH4,NTRK3,PHACTR1,GABRB1,NEO1,CNTN6,SLC39A12,PRKD1,PAK1,EPHA7,RAPGEF2,LRP2,ADGRB3,ARSB,TAOK3,ADAMTSL1,GRM7,EPB41L3,TBCD,NEDD4L,APP,DCLK1,STAU2,TMC1,SEMA5A,SYT1,VCL,ARHGAP44,NTF3,AURKA,SRGAP2C,FIG4,KANK1,MAP4K4,BMPR1B,CTNNA2,PAK3,DIP2B,TRPC5,DNM3,PRKCZ,KLHL1,DIP2A,HECW1,COBL,FRYL,ALCAM,NCAM1,GFRA1,FAT3,CHN1,PAFAH1B1,CTNNA1,PPP1R9A,NFIB,PRGT,TIAM1,ENAH,SEMA3C,TMEM108,ADGRV1,SEMA6D,CDH11,PARD3,BLK,TNR,ELAVL4,ABL1,SDC2,CRTAC1,RAP1A,GRID2,RASGRF1,USP33,PTPRO,TRIO,EXT1,CTNND2,ATP8A2,PLXNA2,KREMEN1,SEMA3E,MARK2,HERC1,EPHA6,ATL1,KND1,AFG3L2,ANK3,BCL11B,ECE1,MBP,FUT9,MYT1L,NPHP4,CNTN1,IQSEC1,SNX3,PDLIM5,DISC1,WDPCP,NRK,SEMA3A,STRN,UNC5D,NCAM2,SEMA3D,PDE6C,RELN,HMGB1,UST,SLC23A2,B4GALT6,TSPAN2,PLS1,SRGAP2,NIN,DRAXIN,ATF1,GLI3,RERE,MAP2,FARP1,BBS4,DCC,RORB,DAB1,PRKN,MTMR2,PCDH15,NGEF,CDH23,ALS2,TOX,ITSN2,ROCK1,LYN,TENM2,NTN1,DYSL5,PBX3,TANC2,NREP,ZDHC17,DZANK1,BMP5,HDGFL3,HCN1,PRKG1,LAMA3,TNN,MICALL2,ROR2,LMX1A,ACTR2,MAP6,VASP,IQGA1,NRXN1,FRY,ALKAL2,JAK2,VSX1,CELSR2,NTM,USH1C,ITGA6,GAP43,GRIP1,GRXCR1,DGKG,ABI1,IMPACT,ITGA4,CYFIP2,MEF2C,ADGRB1,WNT7A,S100B,FOXO6,FBXW8,NECTIN1,NCK1,EPHA4,GABRA5,NTRK2,IL1RAPL1,NUMB,LHX9,FBXO31,HS6ST1,PTK2,FEZ2,LAMB1,CYFIP1,UBE3A,SEMA4D,FAT4,RUNX1,ASAP1,CCDC88A,SPAG6,FYN,HDAC2,NCS1,ROR1,HECW2,CDH2,CNTN5,NTN4,EPHB1,RPIL1,RPS6KA5,PTPRG,NRP1,SDK1,ITGA1,CHODL,NRXN3,CUX1,EPHB2,CD38,PPFIA2,MAGI2,UNK,FLRT2,KALRN,LAMA1,TIAM2,BMP7,DLG5,KIRREL3,ABL2,SLIT2,CCDC141,ROBO1,PBX1,PRKCQ,NLGN1,EFNA5,SLIT3,NTNG1,NYAP2,FOXB1,CAMK1D,OPCML,RPGRI1,SEMA4B,PRDM1,ATAT1,PTPRQ,CSMD3,FSTL4,IGF1R,GLI2,THRB</p> |
| GO:0120036 | plasma membrane bounded cell | 8.334462447501137e-31 | <p>NOTCH2,MTOR,CNTN4,SPOCK1,LRP12,PTPRD,LRR4C,MYO9A,ULK2,LRR49,RIPOR2,RDX,RP1,STXBP1,RALA,BCL2,ODAD2,CHRNA7,ROBO2,RIMS1,TENM3,SDCCAG8,FGD4,SPAG16,MINAR1,CD42EP3,RIMS2,ALK,AUTS2,CARMIL1,PARVB,ANO6,NEGR1,CNTNAP2,MAP4,APC,PLPPR5,DSCAM,CRKL,ARHGAP24,TNIK,DOCK</p>                                                                                                                                                                                                                                                                                                                                                                                                                                                                                                                                                                                                                                                                                                                                                                                                                                                                                                                                                                                                                                                                                                                                                                                                                                                                                                                                                                                                                                                                                                                                                 |

|            |                                |                               |                                                                                                                                                                                                                                                                                                                                                                                                                                                                                                                                                                                                                                                                                                                                                                                                                                                                                                                                                                                                                                                                                                                                                                                                                                                                                                                                                                                                                                                                                                                                                                                                                                                                                                                                                                                                                                                                                                                                                                                                                                                                                                                                                                                                                                                                                                                                                                 |
|------------|--------------------------------|-------------------------------|-----------------------------------------------------------------------------------------------------------------------------------------------------------------------------------------------------------------------------------------------------------------------------------------------------------------------------------------------------------------------------------------------------------------------------------------------------------------------------------------------------------------------------------------------------------------------------------------------------------------------------------------------------------------------------------------------------------------------------------------------------------------------------------------------------------------------------------------------------------------------------------------------------------------------------------------------------------------------------------------------------------------------------------------------------------------------------------------------------------------------------------------------------------------------------------------------------------------------------------------------------------------------------------------------------------------------------------------------------------------------------------------------------------------------------------------------------------------------------------------------------------------------------------------------------------------------------------------------------------------------------------------------------------------------------------------------------------------------------------------------------------------------------------------------------------------------------------------------------------------------------------------------------------------------------------------------------------------------------------------------------------------------------------------------------------------------------------------------------------------------------------------------------------------------------------------------------------------------------------------------------------------------------------------------------------------------------------------------------------------|
|            | projection<br>organizati<br>on |                               | <p>10, RFX3, MACF1, NEDD4, BCL11A, CECR2, ARMC2, CDH4, NTRK3, PHACTR1, NEO1, CNTN6, SLC39A12, PRKD1, PAK1, EPHA7, RAPGEF2, LRP2, ADGRB3, ARSB, TAOK3, ONECUT1, ADAMTSL1, LRGUK, GRM7, SEPTIN9, EPB41L3, NEDD4L, APP, DCLK1, STAU2, SEMA5A, SYT1, VCL, ARHGAP44, NTF3, CD2AP, AURKA, TTC29, SRGAP2C, FIG4, KANK1, MAP4K4, ABCD2, BMPR1B, CTNNA2, PAK3, DIP2B, TRPC5, DNM3, IFT57, PRKCZ, KLHL1, DIP2A, HECW1, COBL, YAP1, FRYL, ALCAM, ABLIM1, NCAM1, GFRA1, FAT3, CHN1, PAFAH1B1, TPM1, CTNNA1, PPP1R9A, NFIB, PRTG, TIAM1, ENAH, SEMA3C, TMEM108, TANC1, ADGRV1, BCAS3, SYNE2, BBS2, SEMA6D, AIF1L, CDH11, PARD3, BLK, TNR, ELAVL4, ABL1, HDAC4, SDC2, CRTAC1, DNAH5, RAP1A, MYO10, GRID2, RASGRF1, USP33, CEP83, CD44, PTPRO, TRIO, EXT1, CTNND2, IFT43, ATP8A2, PLXNA2, ARHGEF7, ABCC4, KREMEN1, SEMA3E, MARK2, TMEM67, HERC1, EPHA6, ATL1, KNDC1, AFG3L2, CFA P61, ANK3, BCL11B, ECE1, MBP, PLCE1, FUT9, CNTN1, IQSEC1, SNX3, PDLIM5, DISC1, WDPCP, NRK, SEMA3A, STRN, UNC5D, NCAM2, DNAL1, SEMA3D, RELN, HMGB1, NUDCD3, UST, RTTN, SLC23A2, TTC21B, B4GALT6, TSPAN2, RAP1GAP, PLS1, SRGAP2, NIN, DRAXIN, DN AH8, ATF1, GLI3, RERE, MAP2, DAW1, FARP1, CYLD, BBS4, KIAA0753, DCC, DAB1, PRKN, MTMR2, PCDH15, NGEF, CDH23, ALS2, TOX, VAV3, ITSN2, CFAP74, ROCK1, LYN, TENM2, NTN1, DPYSL5, INSR, TANC2, NREP, ZDHHC17, IFT81, BMP5, HDGFL3, PRKG1, LAMA3, GRI N2B, TNN, FAM149B1, MICALL2, CDC14B, PCNT, ROR2, LMX1A, ACT R2, TTC39C, MAP6, VASP, IQGAP1, NRXN1, FRY, CIBAR1, ANLN, AL KAL2, JAK2, CELSR2, GORAB, USH1C, NEDD9, ITGA6, GAP43, GRIP 1, BBS9, GRXCR1, DGKG, ABI1, IMPACT, ITGA4, CEP120, CYFIP2, MEF2C, ADGRB1, WNT7A, WASF3, S100B, FOXO6, FBXW8, SDCBP, NE CTIN1, NCK1, DRC7, SNAP29, EPHA4, EMP1, NTRK2, IL1RAPL1, RS PH1, NUMB, LHX9, OCLN, FBXO31, PTK2, MARK4, FEZ2, LAMB1, CYF IP1, UBE3A, HOATZ, SEMA4D, FAT4, SAXO1, ASAP1, CCDC88A, ADA MTS16, SPAG6, FYN, ARL13B, HYDIN, HDAC2, NCS1, ROR1, HECW2, CDH2, CNTN5, EPHB1, RP1L1, RPS6KA5, PTPRG, NRP1, SDK1, IFT46, ITGA1, CHODL, NRXN3, CFAP70, STK36, B9D1, CUX1, EPHB2, TO GARAM1, CD38, PPFIA2, CDH13, ATG5, MAGI2, FLRT2, KALRN, LAM A1, TIAM2, BMP7, DLG5, KIRREL3, DNAH17, ABL2, RFX2, SLIT2, C CDC141, ROBO1, PRKCQ, NLGN1, EFNA5, SLIT3, NTNG1, NYAP2, HT T, FOXB1, CAMK1D, CFAP44, FER, RRGRI1, EPS8, SEMA4B, ATAT1, CSMD3, WASHC1, FSTL4, ZNF423, IGF1R, GLI2, SEPTIN6</p> |
| GO:0030182 | neuron<br>differenti<br>ation  | 1.41610<br>3534242<br>001e-30 | <p>NOTCH2, BRINP3, CNTN4, SPOCK1, LRP12, PTPRD, TRAPPC9, LRRC 4C, MYO9A, ULK2, ZNF536, TENM4, RIPOR2, RP1, STXBP1, BCL2, A LDH1A2, CHRNA7, ROBO2, RIMS1, TENM3, ZEB1, USH2A, MINAR1, R IMS2, ALK, AUTS2, NEGR1, CNTNAP2, MAP4, PLPPR5, DSCAM, RTN1, TCF4, CRKL, TNK1, SLC4A10, DOCK10, MACF1, RNF220, NEDD4, C RB1, BCL11A, CECR2, CDH4, ATP2B2, NTRK3, PHACTR1, GABRB1, N EO1, CNTN6, SLC39A12, PRKD1, PAK1, EPHA7, RAPGEF2, LRP2, AD GRB3, RUNX2, ARSB, TAOK3, ADAMTSL1, GRM7, EPB41L3, TBCD, NE DD4L, HDAC9, APP, DCLK1, STAU2, TMC1, SEMA5A, SYT1, VCL, ARH GAP44, NTF3, AURKA, SRGAP2C, FIG4, KANK1, MAP4K4, BMPR1B, C TNNA2, PAK3, DIP2B, TRPC5, DNM3, PRKCZ, KLHL1, DIP2A, ZSWIM 6, HECW1, COBL, FRYL, BRINP1, ALCAM, NCAM1, GFRA1, FAT3, CHN 1, PAFAH1B1, CTNNA1, PPP1R9A, NFIB, PRTG, TIAM1, ENAH, SEMA 3C, TMEM108, ADGRV1, WNT9B, SEMA6D, CDH11, PARD3, BLK, TNR, ELAVL4, ABL1, SDC2, CRTAC1, RAP1A, GRID2, NRG1, ASPM, RASGR F1, SH3GL3, USP33, PTPRO, TRIO, EXT1, CTNND2, ATP8A2, PLXNA 2, KREMEN1, SEMA3E, MARK2, HERC1, EPHA6, ATL1, KNDC1, AFG3L 2, MOSMO, ANK3, BCL11B, ECE1, MBP, FUT9, MYT1L, NPHP4, CNTN1, IQSEC1, SNX3, PDLIM5, DISC1, WDPCP, NRK, SEMA3A, STRN, BMP 2, UNC5D, NCAM2, SEMA3D, PDE6C, RELN, HMGB1, UST, SLC23A2, E SRP1, TTC21B, B4GALT6, TSPAN2, RAP1GAP, PLS1, SRGAP2, NIN, DRAXIN, ATF1, GLI3, PCP4, MYEF2, RERE, MAP2, FARP1, BBS4, DC C, RORB, DAB1, PRKN, MTMR2, TBX20, PCDH15, NGEF, CDH23, ALS2, TOX, ITSN2, ROCK1, LYN, VCAM1, DTX1, TENM2, NTN1, ZFXH3, DP YSL5, CASZ1, PBX3, TANC2, RXRG, NREP, ZDHHC17, DZANK1, BMP5, HDGFL3, HCN1, PRKG1, LAMA3, MYCL, TNN, MICALL2, MED1, ROR2, ZNF521, LMX1A, ACTR2, MAP6, VASP, IQGAP1, NRXN1, HIPK1, FR Y, LMX1B, ALKAL2, JAK2, VSX1, CELSR2, NTM, USH1C, ITGA6, GAP</p>                                                                                                                                                                                                                                                                                                                                                                                                                                                                                                                                                                                                   |

|            |                                |                               |                                                                                                                                                                                                                                                                                                                                                                                                                                                                                                                                                                                                                                                                                                                                                                                                                                                                                                                                                                                                                                                                                                                                                                                                                                                                                                                                                                                                                                                                                                                                                                                                                                                                                                                                                                                                                                                                                                                                                                                                                                                                                                                                                                                                                                                                                                             |
|------------|--------------------------------|-------------------------------|-------------------------------------------------------------------------------------------------------------------------------------------------------------------------------------------------------------------------------------------------------------------------------------------------------------------------------------------------------------------------------------------------------------------------------------------------------------------------------------------------------------------------------------------------------------------------------------------------------------------------------------------------------------------------------------------------------------------------------------------------------------------------------------------------------------------------------------------------------------------------------------------------------------------------------------------------------------------------------------------------------------------------------------------------------------------------------------------------------------------------------------------------------------------------------------------------------------------------------------------------------------------------------------------------------------------------------------------------------------------------------------------------------------------------------------------------------------------------------------------------------------------------------------------------------------------------------------------------------------------------------------------------------------------------------------------------------------------------------------------------------------------------------------------------------------------------------------------------------------------------------------------------------------------------------------------------------------------------------------------------------------------------------------------------------------------------------------------------------------------------------------------------------------------------------------------------------------------------------------------------------------------------------------------------------------|
|            |                                |                               | 43,GRIP1,GRXCR1,DGKG,MTPN,ABI1,IMPACT,ITGA4,CYFIP2,MEF2C,ADGRB1,WNT7A,S100B,FOXO6,FBXW8,NECTIN1,NCK1,PP2R3A,EPHA4,GABRA5,NTRK2,IL1RAPL1,NUMB,LHX9,WNT2B,FBXO31,HS6ST1,PTK2,FEZ2,LAMB1,CYFIP1,UBE3A,SEMA4D,FAT4,RUNX1,WNT5B,ASAP1,CCDC88A,SPAG6,FYN,HDAC2,NCS1,DOK5,MDGA2,ROR1,HECW2,CDH2,CNTN5,NTN4,XRN2,EPHB1,RP1L1,RPS6KA5,PTPRG,NRP1,SDK1,ITGA1,CHODL,NRXN3,CUX1,EPHB2,CD38,MET,PPFIA2,MAGI2,UNK,FLRT2,KALRN,LAMA1,TIAM2,BMP7,DLG5,KIRREL3,DDX6,ABL2,EYA1,SLIT2,CCDC141,ERBB4,ROBO1,PBX1,PRKCQ,NLGN1,EFNA5,TCF12,SLIT3,NTNG1,NYAP2,FOXB1,CAMK1D,OPCML,RPGRIP1,SEMA4B,PRDM1,RORA,ATAT1,PTPRQ,CSMD3,FSTL4,IGF1R,GLI2,THRB                                                                                                                                                                                                                                                                                                                                                                                                                                                                                                                                                                                                                                                                                                                                                                                                                                                                                                                                                                                                                                                                                                                                                                                                                                                                                                                                                                                                                                                                                                                                                                                                                                                                                  |
| GO:0030030 | cell projection organization   | 2.12776<br>4766826<br>225e-30 | NOTCH2,MTOR,CNTN4,SPOCK1,LRP12,PTPRD,LRR4C,MYO9A,ULK2,LRR4C,RIPOR2,RDX,RP1,STXBP1,RALA,BCL2,ODAD2,CHRNA7,ROBO2,RIMS1,TENM3,SDCCAG8,FGD4,SPAG16,MINAR1,CD42EP3,RIMS2,ALK,AUTS2,CARMIL1,PARVB,ANO6,NEGR1,CNTNAP2,MAP4,APC,PLPPR5,DSCAM,CRKL,ARHGAP24,TNIK,DOCK10,RFX3,MACF1,NEDD4,BCL11A,CECR2,ARMC2,CDH4,NTRK3,PHACTR1,NEO1,CNTN6,SLC39A12,PRKD1,PAK1,EPHA7,RAPGEF2,LRP2,ADGRB3,DEUP1,ARSB,TAOK3,ONECUT1,ADAMTSL1,LRGUK,GRM7,SEPTIN9,EPB41L3,NEDD4L,APP,DCLK1,STAU2,SEMA5A,SYT1,VCL,ARHGAP44,NTF3,CD2AP,AURKA,TTC29,SRGAP2C,FIG4,KANK1,MAP4K4,ABCD2,BMPR1B,CTNNA2,RAB8B,PAK3,DIP2B,TRPC5,DNM3,IFT57,PRKCZ,KLHL1,DIP2A,HECW1,COBL,YAP1,FRYL,ALCAM,ABLIM1,NCAM1,GFRA1,FAT3,CHN1,PAFAH1B1,TPM1,CTNNA1,PPP1R9A,NFIB,PRTG,TIAM1,ENAH,SEMA3C,TEMEM108,TANC1,ADGRV1,BCAS3,SYNE2,BBS2,SEMA6D,AIF1L,CDH11,PARD3,BLK,TNR,ELAVL4,ABL1,HDAC4,SDC2,CRTAC1,DNAH5,RAP1A,MYO10,GRID2,RASGRF1,USP33,CEP83,CD44,PTPRD,TRIO,EXT1,CTNND2,IFT43,ATP8A2,PLXNA2,ARHGEF7,ABCC4,KREMEN1,SEMA3E,MARK2,TMEM67,HERC1,EPHA6,ATL1,KNDC1,AFG3L2,CFAP61,ANK3,BCL11B,ECE1,MBP,PLCE1,FUT9,PACSIN2,CNTN1,IQSEC1,SNX3,PDLIM5,DISC1,WDCP,NRK,SEMA3A,STRN,UNC5D,NCAM2,DNAL1,SEMA3D,RELN,HMGB1,NUDCD3,UST,RTTN,SLC23A2,TTC21B,B4GALT6,SPAN2,RAP1GAP,PLS1,SRGAP2,NIN,DRAXIN,DNAH8,ATF1,GLI3,RERE,MAP2,DAW1,FARP1,CYLD,BBS4,KIAA0753,DCC,DAB1,PRKN,MTMR2,PCDH15,NGEF,CDH23,ALS2,TOX,VAV3,ITSN2,CFAP74,ROCK1,LYN,TENM2,NTN1,DYSL5,INSR,TANC2,NREP,ZDHHC17,IFT81,BMP5,HDGFL3,PRKG1,LAMA3,GRIN2B,TNN,FAM149B1,MICALL2,CDC14B,PCNT,ROR2,LMX1A,ACTR2,TTC39C,MAP6,VASP,IQGAP1,NRXN1,FRY,CIBAR1,ANLN,ALKAL2,JAK2,CELSR2,GORAB,USH1C,NEDD9,ITGA6,GAP43,GRIP1,BBS9,GRXCR1,DGKG,ABI1,IMPACT,ITGA4,CEP120,CYFIP2,MEF2C,ADGRB1,WNT7A,WASF3,S100B,FOXO6,PKN2,FBXW8,SDCBP,NECTIN1,NCK1,DRC7,SNAP29,EPHA4,EMP1,NTRK2,IL1RAPL1,RSPH1,NUMB,LHX9,OCLN,FBXO31,PTK2,MARK4,FEZ2,LAMB1,CYFIP1,UBE3A,HOATZ,SEMA4D,FAT4,SAXO1,ASAP1,CCDC88A,ADAMTS16,SPAG6,FYN,ARL13B,HDYIN,HDAC2,NCS1,ROR1,HECW2,CDH2,CNTN5,ITGA8,EPHB1,RP1L1,RPS6KA5,PTPRG,NRP1,SDK1,IFT46,ITGA1,CHODL,NRXN3,CFAP70,STK36,B9D1,CUX1,EPHB2,TOGARAM1,CD38,PPFIA2,CDH13,ATG5,MAGI2,FLRT2,KALRN,LAMA1,TIAM2,BMP7,DLG5,KIRREL3,DNAH17,ABL2,RFX2,SLIT2,CCDC141,ROBO1,PRKCQ,NLGN1,EFNA5,SLIT3,DNAH9,NTNG1,NYAP2,HTT,FOXB1,CAMK1D,CFAP44,FER,RPGRIP1,EPS8,SEMA4B,ATAT1,CSMD3,WASHC1,FSTL4,ZNF423,IGF1R,GLI2,SEPTIN6 |
| GO:0048869 | cellular developmental process | 4.54745<br>0955755<br>203e-30 | NOTCH2,BRINP3,MTOR,CNTN4,SPOCK1,SGCD,LRP12,PTPRD,TRAPPC9,NEBL,LRR4C,SMOC1,MYO9A,ULK2,FTO,MGA,PLCB1,ZNF536,ZFPM2,TENM4,NUBPL,ZDHHC21,RIPOR2,PDE4D,RDX,RP1,STXBP1,BCL2,PRDM16,ALDH1A2,FBN1,CHRNA7,ROBO2,RIMS1,TENM3,ZEB1,AKR1C3,SDCCAG8,RARB,SPRED1,NAV2,SPAG16,MYO1E,USH2A,MINAR1,RIMS2,ALK,AUTS2,FOXJ2,CARMIL1,ASTN1,RIN2,PARVB,NEGR1,MLLT3,CNTNAP2,MAP4,APC,PLPPR5,DSCAM,RTN1,TCF4,CRKL,ILDR2,SOX5,SETD2,ERG,ARHGAP24,TNIK,SLC4A10,PTPRJ,OCA2,KDM4C,DOCK10,EGFR,RFX3,ANGPT1,CDK12,MACF1,RNF220,DOCK2,NEDD4,MYOF,SND1,CRB1,BC                                                                                                                                                                                                                                                                                                                                                                                                                                                                                                                                                                                                                                                                                                                                                                                                                                                                                                                                                                                                                                                                                                                                                                                                                                                                                                                                                                                                                                                                                                                                                                                                                                                                                                                                                                               |

|  |  |  |                                                                                                                                                                                                                                                                                                                                                                                                                                                                                                                                                                                                                                                                                                                                                                                                                                                                                                                                                                                                                                                                                                                                                                                                                                                                                                                                                                                                                                                                                                                                                                                                                                                                                                                                                                                                                                                                                                                                                                                                                                                                                                                                                                                                                                                                                                                                                                                                                                                                                                                                                                                                                                                                                                                                                                                                                                                                                                                                                                                                                                                                                                                                                                                                                                                                                                                                                                                                                                                                               |
|--|--|--|-------------------------------------------------------------------------------------------------------------------------------------------------------------------------------------------------------------------------------------------------------------------------------------------------------------------------------------------------------------------------------------------------------------------------------------------------------------------------------------------------------------------------------------------------------------------------------------------------------------------------------------------------------------------------------------------------------------------------------------------------------------------------------------------------------------------------------------------------------------------------------------------------------------------------------------------------------------------------------------------------------------------------------------------------------------------------------------------------------------------------------------------------------------------------------------------------------------------------------------------------------------------------------------------------------------------------------------------------------------------------------------------------------------------------------------------------------------------------------------------------------------------------------------------------------------------------------------------------------------------------------------------------------------------------------------------------------------------------------------------------------------------------------------------------------------------------------------------------------------------------------------------------------------------------------------------------------------------------------------------------------------------------------------------------------------------------------------------------------------------------------------------------------------------------------------------------------------------------------------------------------------------------------------------------------------------------------------------------------------------------------------------------------------------------------------------------------------------------------------------------------------------------------------------------------------------------------------------------------------------------------------------------------------------------------------------------------------------------------------------------------------------------------------------------------------------------------------------------------------------------------------------------------------------------------------------------------------------------------------------------------------------------------------------------------------------------------------------------------------------------------------------------------------------------------------------------------------------------------------------------------------------------------------------------------------------------------------------------------------------------------------------------------------------------------------------------------------------------------|
|  |  |  | <p> L11A,SOX6,TMEM182,CECR2,ARMC2,CHSY1,FLI1,CDH4,ATP2B2,NTRK3,RXFP1,PHACTR1,FLT1,DNAJC13,GABRB1,PSMA8,EDAR,NEO1,CNTN6,SLC39A12,SLC8A3,PRKD1,PAK1,EPHA7,SPEN,RAPGEF2,LRP2,ADGRB3,DEUP1,RUNX2,ARSB,CPS1,TAOK3,ONECUT1,TMEM38B,ADAMTSL1,SMYD3,LRGUK,GRM7,RETREG1,GHR,EPB41L3,COL4A2,SSBP3,TBCD,NEDD4L,HDAC9,ZHX3,APP,ABC B5,RPS6KA2,DCLK1,STAU2,TMC1,SEMA5A,SYT1,VCL,ARHGAP44,NTF3,AURKA,PYGO1,SLC8A1,SRGAP2C,FIG4,KANK1,MAP4K4,BMPR1B,FMN2,THSD7A,AKAP6,CTNNA2,ARNT,PAK3,TTLL7,DIP2B,ITPKB,TRPC5,DNM3,RBM47,PRKCZ,KLHL1,DIP2A,COL27A1,ZSWIM6,HECW1,ABCA5,PHF19,MRTFA,TAF4B,COBL,EBF2,YAP1,FRYL,SHC4,BRINP1,MAPK1,ADAM22,KMT2E,ALCAM,PLG,NRG3,NCAM1,GFRA1,SYCP1,NIPBL,RNF17,GABPA,FAT3,LCE1F,CHN1,MYLK3,MBNL1,PAFAH1B1,EFEMP1,TLL1,DCAF1,ITGB8,TPM1,NF2,RBFOX1,CTNNA1,PPP1R9A,KLF15,PPARA,MEIS2,NFIB,MRTFB,PRTG,SYNJ1,NR5A2,TIAM1,FOXJ3,KAZN,ENAH,SEMA3C,NAV3,TMEM108,ALPK2,JARID2,GATAD2B,DYSF,IL34,ANK2,TANC1,ADGRV1,SYNE2,BBS2,WNT9B,SLC9C1,RANBP3L,SEMA6D,SMARCA4,CDH11,LDB3,PARD3,PIAS1,BLK,TNR,COL22A1,CXADR,ATRX,ELAVL4,ABL1,HDAC4,SLC1A1,SDC2,KCNH1,CRTAC1,DROSHA,L3MBTL3,RAP1A,GLIS1,MORC1,CAMK4,FGF10,GRID2,TGM1,PEAK1,LATS2,NRG1,ASPM,AP3B1,RASGRF1,ATP11C,SYNE1,ZBTB16,MUSK,ZNF675,SH3GL3,PGM5,NXN,USP33,FBN2,CD44,PTPRO,ALPK3,TRIO,PDE3A,EXT1,LIMD1,SPRED2,RPS6KA3,CTNND2,NHS,ATP8A2,PTPN2,PLXNA2,HTR2C,ARHGEF7,AMBRA1,OPRM1,HTR2A,FANCA,DAZL,KREMEN1,SEMA3E,MARK2,ALPL,FHL2,PUM1,TMOD2,HERC1,MSH2,CDIN1,EPHA6,ANKRD17,ATL1,CDKN2C,KNDC1,BICRAL,AFG3L2,MOSMO,SGCZ,ADAM12,MYLK2,ANK3,HMGA2,MYOM2,BCL11B,DOCK5,ECE1,CREM,MBP,TRPS1,HIP1,CRIM1,FUT9,VAV1,MYT1L,TJP1,LDLRAD4,NPHP4,PACSI N2,CNTN1,HLA-B,IQSEC1,SNX3,PDLIM5,BRCA2,DISC1,DNER,WDCP,NRK,SEMA3A,STRN,BMP2,RC3H2,UNC5D,TRAK1,PSG9,PTCD2,MSR1,NCA M2,MSI2,SEMA3D,PDE6C,RELN,HMGB1,FGF9,NFATC2,TDRD7,UST,SLC23A2,ANKRD26,ESRP1,TTC21B,ETS2,DOCK1,B4GALT6,TSPAN2,RAP1GAP,PLS1,SRGAP2,NIN,DRAXIN,ATF1,SLAMF1,SMARCA2,ETS1,GLI3,SMARCC1,NHSL1,SLC9A4,PCP4,MYEF2,ZNF431,RERE,MAP2,LAMC1,RRBP1,FARP1,TDRD5,ATF2,HIRA,BBS4,LAMC3,HIVEP3,COL5A1,CFTR,NELL1,KITLG,DCC,MYT1,RCAN1,RORB,DAB1,SELENON,PRKN,MTMR2,SH3PXD2A,TBX20,PCDH15,ZNF541,DPF3,NGEF,GRIN2A,ARID5B,CDH23,PRKC,IL6R,ALS2,RACGAP1,HEMGN,DMC1,LCE3B,TOX,PTPRB,CATSPERG,TBATA,ITSN2,SOX30,PTGFRN,ARHGEF28,ADGRG6,YIPF6,ROCK1,LYN,VCAM1,CTSB,EIF2B3,PLEKHB2,DTX1,TENM2,OVOL2,PIWIL3,NTN1,ZFXH3,DPYSL5,ARID1B,CRACR2A,CASZ1,DMBT1,TFF1,HECTD1,SHROOM3,HDAC11,PBX3,SNAI2,TANC2,RXRG,SP3,FLNB,TRIM58,TIAL1,ELF2,NREP,ZDHHC17,CERS3,SLC22A14,CD9,KRT6B,TWIST2,IFT81,ENPP1,RASGRP1,DZANK1,NDRG2,BMP5,CSF1,HDGFL3,BCL2L1,SPATA48,CTDP1,HCN1,PRKG1,LAM A3,ASB4,CNMD,SMAD5,CELF4,ABCG1,PRAME,MYCL,TNN,CABYR,PSAP,MICALL2,MED1,KDM6A,ATRAN,IL33,AJAP1,ROR2,ZNF521,FAT1,LMX1A,TMEM178A,IL10,ACTR2,PRAMEF25,PTH,SDF4,SOSTDC1,SOHLH1,PACRG,ABHD2,VSTM2A,MAP6,VASP,ETV6,IQ GAP1,ZBTB7C,ANP32B,YBX3,NRXN1,PCID2,HIPK1,FRY,CADM1,PEG10,LMX1B,ANLN,TWIST1,ALKAL2,JAK2,VSX1,FSTL1,CELSR2,MELTF,ARL11,PCNA,UFL1,ADAMTS5,NFKBIA,NTM,ABCC8,ANXA4,USH1C,NEDD9,OLFM4,ITGA6,GAP43,GRIPI,EML1,MAST2,BBS9,EXT2,KRT6A,GRXCR1,STAT1,NR2C1,MAP2K6,CMTM7,DGKG,MTPN,ABI1,MYO18B,ARMC6,PRAMEF2,POU6F2,IMPACT,ITGA4,BCAP29,FBXL17,ADCYAP1R1,MTF2,NCAPG2,ASB2,MYOCD,CEP120,DHTKD1,CYFIP2,KRT85,MEF2C,ADGRB1,RXRA,WNT7A,RBPMS2,MAP3K5,NDFIP1,MAP3K4,WASF3,S100B,PRDM13,FOXO6,PDE2A,RAB38,FBXW8,SDCBP,NECTIN1,WWOX,NCK1,FLVCR1,FGR,DRC7,PPP2R3A,SPRR2D,RNF8,LCE3D,EPHA4,GABRA5,MECOM,DNMT3L,NTRK2,IL1RAPL1,FNDC3A,RSPH1,NUMB,LHX9,ADAMTS9,WNT2B,CD101,MEGF10,IL17RD,FBXO31,IREB2,HS6ST1, </p> |
|--|--|--|-------------------------------------------------------------------------------------------------------------------------------------------------------------------------------------------------------------------------------------------------------------------------------------------------------------------------------------------------------------------------------------------------------------------------------------------------------------------------------------------------------------------------------------------------------------------------------------------------------------------------------------------------------------------------------------------------------------------------------------------------------------------------------------------------------------------------------------------------------------------------------------------------------------------------------------------------------------------------------------------------------------------------------------------------------------------------------------------------------------------------------------------------------------------------------------------------------------------------------------------------------------------------------------------------------------------------------------------------------------------------------------------------------------------------------------------------------------------------------------------------------------------------------------------------------------------------------------------------------------------------------------------------------------------------------------------------------------------------------------------------------------------------------------------------------------------------------------------------------------------------------------------------------------------------------------------------------------------------------------------------------------------------------------------------------------------------------------------------------------------------------------------------------------------------------------------------------------------------------------------------------------------------------------------------------------------------------------------------------------------------------------------------------------------------------------------------------------------------------------------------------------------------------------------------------------------------------------------------------------------------------------------------------------------------------------------------------------------------------------------------------------------------------------------------------------------------------------------------------------------------------------------------------------------------------------------------------------------------------------------------------------------------------------------------------------------------------------------------------------------------------------------------------------------------------------------------------------------------------------------------------------------------------------------------------------------------------------------------------------------------------------------------------------------------------------------------------------------------------|

|            |                                    |                        |                                                                                                                                                                                                                                                                                                                                                                                                                                                                                                                                                                                                                                                                                                                                                                                                                                                                                                                                                                                                                                                                                                                                                                                                                                                                                                                                                                                                                                                                                                                                                                                                                                                                                                                                                                                                                                                                                                                                                                                                                                                                                                                                                                                                                                                                                                                                                                                                                                                                                                                                                                                                                                                                                                                                                                                                                                                      |
|------------|------------------------------------|------------------------|------------------------------------------------------------------------------------------------------------------------------------------------------------------------------------------------------------------------------------------------------------------------------------------------------------------------------------------------------------------------------------------------------------------------------------------------------------------------------------------------------------------------------------------------------------------------------------------------------------------------------------------------------------------------------------------------------------------------------------------------------------------------------------------------------------------------------------------------------------------------------------------------------------------------------------------------------------------------------------------------------------------------------------------------------------------------------------------------------------------------------------------------------------------------------------------------------------------------------------------------------------------------------------------------------------------------------------------------------------------------------------------------------------------------------------------------------------------------------------------------------------------------------------------------------------------------------------------------------------------------------------------------------------------------------------------------------------------------------------------------------------------------------------------------------------------------------------------------------------------------------------------------------------------------------------------------------------------------------------------------------------------------------------------------------------------------------------------------------------------------------------------------------------------------------------------------------------------------------------------------------------------------------------------------------------------------------------------------------------------------------------------------------------------------------------------------------------------------------------------------------------------------------------------------------------------------------------------------------------------------------------------------------------------------------------------------------------------------------------------------------------------------------------------------------------------------------------------------------|
|            |                                    |                        | <p>PTK2, CDH5, NFKBID, CLDN18, FEZ2, LAMB1, CYFIP1, UBE3A, SEMA4D, JAM2, FRMD6, FAT4, LRMDA, RUNX1, AKR1B1, WNT5B, ASAP1, FCRLA, DPY19L2, SORBS2, CCDC88A, GPR55, NSUN2, SPAG6, TNFSF11, FYN, NLRP14, UNC45B, ARL13B, HYDIN, UHRF2, HDAC2, GON4L, TBX15, NCS1, COL18A1, DOK5, MAPK9, CRTAM, COL19A1, APELA, MDGA2, ROR1, TET1, HECW2, CDH2, CNTN5, ITGA8, NTN4, XRN2, GPR137B, EPHB1, RP1L1, GRM5, RAI14, RPS6KA5, PTPRG, PID1, NRPI, SDK1, PRKCA, FAIM, ITGA1, RC3H1, CHODL, POR, BCR, TUT4, NRXN3, SNRK, C14ORF39, FBLN1, PAQR5, MB, RAG1, B9D1, RRAS2, CUX1, MACROH2A1, MITF, EPHB2, CD38, EYA4, MET, CDH17, PPFIA2, ATG5, NRAP, MAGI2, UNK, FLRT2, MYB, KALRN, LAMA1, MFHAS1, ATRNL1, TIAM2, BMP7, ASTN2, DLG5, KIRREL3, NUDT21, DDX6, ADGRF5, ABL2, RFX2, EYA1, FHOD3, SLIT2, CCDC141, ERBB4, ROBO1, PBX1, PRKCQ, ANTXR1, NDRG1, SIPA1L3, MGMT, NLGN1, NOS1, EFN A5, TCF12, VCAN, RAB27A, SLIT3, ESR1, NTNG1, LOXL2, NYAP2, PRLR, FOXB1, CAMK1D, PIK3R3, CFAP44, OPCML, CATSPERE, FER, EYA2, CCR2, RPGRIP1, A2M, SEMA4B, ROCK2, PRDM1, RORA, ATAT1, DMRT1, CATSPER2, HSPG2, PTPRQ, CSMD3, NCOA6, HOOK3, FSTL4, PNPLA3, STK3, ZNF423, HNRNPU, APCDD1, IGF1R, GLI2, THRB, AKAP13, SEPTIN6, DNMI1L</p>                                                                                                                                                                                                                                                                                                                                                                                                                                                                                                                                                                                                                                                                                                                                                                                                                                                                                                                                                                                                                                                                                                                                                                                                                                                                                                                                                                                                                                                                                                                                                                                                                                             |
| GO:0009653 | anatomical structure morphogenesis | 1.0077130133980986e-29 | <p>NOTCH2, BCAR3, MTOR, CNTN4, SGCD, PTPRD, FREM1, NEBL, LRRC4C, MYO9A, ULK2, TAF45, CLTCL1, ZFPM2, TENM4, NUBPL, DLC1, ROPOR2, RDX, RP1, STXBP1, RALA, BCL2, ALDH1A2, FBN1, CDH8, CHRNA7, ROBO2, RIMS1, SPIRE1, TENM3, ZEB1, SDCCAG8, RARB, FGD4, SPRED1, ENPEP, MYO1E, USH2A, MINAR1, CDC42EP3, RIMS2, AUTS2, FOXJ2, CARMIL1, PAPP2, RIN2, PARVB, MLLT3, GPC6, CNTNAP2, MYO3B, ZMYM4, DSCAM, CRKL, SOX5, SETD2, ARHGAP24, TNIK, SLC4A10, KDM4C, DOCK10, EGFR, ANGPT1, MACF1, PRKACB, NEDD4, MYOF, CRB1, BCL11A, SOX6, TMEM182, CECR2, CHSY1, FLI1, CDH4, RXFP1, C5, PHACTR1, FLT1, EDAR, NEO1, CNTN6, SLC39A12, PRKD1, PAK1, EPHA7, RAPGEF2, LRP2, ADGRB3, RUNX2, TAOX3, ONECUT1, ADAMTSL1, PRICKLE2, GHR, LUZP1, EPB41L3, COL4A2, SSBP3, TBCD, NEDD4L, HDAC9, APP, CACNA1C, DCLK1, STAU2, SEMA5A, SYT1, VCL, ARHGAP44, NTF3, AURKA, CFDP1, FIG4, KANK1, MAP4K4, BMPR1B, THSD7A, CTNNA2, PAK3, DIP2B, TRPC5, DNMI3, IFT57, PRKCZ, CALD1, DIP2A, COL27A1, HECW1, MRTFA, COBL, YAP1, FRYL, RIPK4, MAPK1, CRISPLD2, ALCAM, ZNRF3, ABLIM1, NRG3, NCAM1, NIPBL, GABPA, FAT3, CHN1, MYLK3, FMN1, MBNL1, PAFAH1B1, EFEMP1, ITGB8, TPM1, NF2, CTNNA1, ANKRD11, CDH7, PPARA, MEIS2, NFIB, PRTG, NR5A2, TIAM1, ENAH, SF3B6, SEMA3C, SLC24A4, TMM108, AGO2, ALPK2, DNAH11, CPE, ANK2, BRWD1, TANC1, BCAS2, RYR2, BBS2, WNT9B, SEMA6D, CDH11, LDB3, PARD3, TNR, COL22A1, ATRX, XIRP2, ELAVL4, ABL1, SLC1A1, SDC2, GAS2, KCNH1, CDH18, RAP1A, MYO10, FGF10, GRID2, CDHR3, PEAK1, LATS2, NRG1, AP3B1, ZBTB16, SETDB2, PGM5, USP33, FBN2, CD44, PTPRO, EGF, TRIO, EXT1, LIMD1, CTNND2, ATP8A2, PLXNA2, ARHGEF7, CNM4, SEMA3E, MARK2, ALPL, FHL2, TMOD2, HERC1, IGF2BP3, EPHA6, SH3KBP1, ATL1, EPN2, KND1, AFG3L2, ADAM12, MYLK2, ANK3, EMILIN2, HMGA2, MYOM2, BCL11B, DOCK5, ECE1, MBP, TGFA, CDH20, TJP1, EGFLAM, PACSIN2, CNTN1, MTHFD1L, PDLIM5, DISC1, WDPCP, NRK, SEMA3A, BMP2, UNC5D, PTCDD2, SEMA3D, ASXL3, PDE6C, RELN, FGF9, NFATC2, TDRD7, UST, SLC23A2, TTC21B, ETS2, DOCK1, B4GALT6, PLS1, SRGAP2, NIN, DRAXIN, ETS1, GLI3, MEGF11, SMARCC1, AFF3, SMOC2, CUL1, RERE, MAP2, LAMC1, FARP1, ATF2, HIRA, BBS4, LAMC3, COL5A1, CFTR, DCC, GTF2I, RORB, DAB1, MYO3A, PRKN, MTMR2, SH3PXD2A, TBX20, PCDH15, NGEF, ARID5B, CDH23, ALS2, PTPRB, SCN10A, VAV3, ITSN2, SOX30, PTGFRN, ARHGEF28, ADGRG6, ROCK1, LRIG1, OVOL2, NTN1, MMP16, DPYSL5, HOXC13, INSR, HECTD1, SHROOM3, DDHD1, PBX3, SNAI2, ASH1L, HOXC4, TANC2, SP3, FLNB, ZDHHC17, NSD2, CD9, CARD10, JCAD, DZANK1, BMP5, WDR72, CSF1, BCL2L1, KRT25, HCN1, LAMA3, ASB4, CNMD, DHRS3, SMAD5, FOXN3, VSTM4, SLC40A1, TNN, MICALL2, MED1, KDM6A, ATRN, AJAP1, FAT1, LMX1A, IL10, ACTR2, SCML2, TTC39C, SOSTDC1, MAP6, VASP, PALMD, IQGAP1, AIMP1, NRXN1, HIPK1, FRY, CIBAR1, TWIST1, AKT3, VSX1, SVEP1, CELSR2, CREBBP, MELTF, GORAB, ADAMTS5, PRKCB, ABCC8, ALX4, USH1C, NEDD9, OLFM4, ITGA6, GAP</p> |

|            |                      |                        |                                                                                                                                                                                                                                                                                                                                                                                                                                                                                                                                                                                                                                                                                                                                                                                                                                                                                                                                                                                                                                                                                                                                                                                                                                                                                                                                                                                                                                                                                                                                                                                                                                                                                                                                                                                                                                                                                                                                                                                                                                                                                                                                                                                                                                                                                                                                                                                       |
|------------|----------------------|------------------------|---------------------------------------------------------------------------------------------------------------------------------------------------------------------------------------------------------------------------------------------------------------------------------------------------------------------------------------------------------------------------------------------------------------------------------------------------------------------------------------------------------------------------------------------------------------------------------------------------------------------------------------------------------------------------------------------------------------------------------------------------------------------------------------------------------------------------------------------------------------------------------------------------------------------------------------------------------------------------------------------------------------------------------------------------------------------------------------------------------------------------------------------------------------------------------------------------------------------------------------------------------------------------------------------------------------------------------------------------------------------------------------------------------------------------------------------------------------------------------------------------------------------------------------------------------------------------------------------------------------------------------------------------------------------------------------------------------------------------------------------------------------------------------------------------------------------------------------------------------------------------------------------------------------------------------------------------------------------------------------------------------------------------------------------------------------------------------------------------------------------------------------------------------------------------------------------------------------------------------------------------------------------------------------------------------------------------------------------------------------------------------------|
|            |                      |                        | <p>43,GRIP1,OTOP1,EXT2,KRT6A,AGO1,MEOX2,GRXCR1,STAT1,SHROOM2,MTPN,ABI1,MYO18B,IMPACT,CCBE1,ITGA4,CSMD1,ASB2,MYOCD,CYFIP2,MEF2C,ADGRB1,WNT7A,RBPMS2,WASF3,S100B,FBXW8,NECTIN1,WWOX,FLVCR1,FGR,PPP2R3A,DNMBP,EPHA4,NTRK2,IL1RAPL1,NUMB,LHX9,ADAMTS9,WNT2B,TNNI1,FBXO31,HS6ST1,PTK2,CDH5,ANKRD6,ARHGAP12,DIAPH1,FEZ2,LAMB1,CYFIP1,UBE3A,PCDH8,SEMA4D,JAM2,FRMD6,FAT4,RUNX1,WNT5B,PDCL3,ADAMTS16,SPAG6,BICD1,TNFSF11,FYN,MYL12B,ARL13B,HDAC2,TBX15,COL18A1,CDH9,APELA,ROR1,TET1,HECW2,CDH2,CNTN5,ITGA8,NTN4,EPHB1,ADCK1,RPS6KA5,PID1,NRP1,SDK1,PRKCA,ITGA1,RC3H1,CHODL,POR,BCR,NRXN3,KIF16B,CDH12,FBLN1,B9D1,DGCR2,BMPER,CUX1,MACROH2A1,EPHB2,EYA4,MET,PPFIA2,CDH13,NRAP,MAGI2,UNK,FAM171A1,FLRT2,KALRN,GNAS,LAMA1,GREB1L,ATRNL1,TIAM2,BMP7,ASTN2,DLG5,KIRREL3,ADGRF5,PDGFC,RFX2,EYA1,FHOD3,SLIT2,EXO4,CCDC141,ERBB4,ROBO1,PBX1,PRKCQ,ANTXR1,SIPA1L3,NLGN1,NOS1,SLC6A3,EFNA5,SLIT3,ESR1,NTNG1,LOXL2,NYAP2,FOXB1,PIK3R3,FER,EYA2,CCR2,RPGRI1,STARD13,EPS8,SEMA4B,ROCK2,PRDM1,RORA,DMRT1,HSPG2,PTPRQ,COL4A3,FSTL4,STK3,ZNF568,APCDD1,IGF1R,GLI2,THRB,AKAP13,ATP10A,DNM1L</p>                                                                                                                                                                                                                                                                                                                                                                                                                                                                                                                                                                                                                                                                                                                                                                                                                                                                                                                                                                                                                                                                                                                                                                                                                                                                                                                |
| GO:0030154 | cell differentiation | 1.0426676229613627e-29 | <p>NOTCH2,BRINP3,MTOR,CNTN4,SPOCK1,SGCD,LRP12,PTPRD,TRAPPC9,NEBL,LRRC4C,SMOC1,MYO9A,ULK2,FTO,MGA,PLCB1,ZNF536,ZFPM2,TENM4,ZDHHC21,RIPOR2,PDE4D,RDX,RP1,STXBP1,BCL2,PRDM16,ALDH1A2,FBN1,CHRNA7,ROBO2,RIMS1,TENM3,ZEB1,AKR1C3,SDCCAG8,RARB,SPRED1,NAV2,SPAG16,MYO1E,USH2A,MINAR1,RIMS2,ALK,AUTS2,FOXJ2,CARMIL1,ASTN1,RIN2,PARVB,NEGR1,MLLT3,CNTNAP2,MAP4,APC,PLPPR5,DSCAM,RTN1,TCF4,CRKL,ILDR2,SOX5,SETD2,ERG,ARHGAP24,TNIK,SLC4A10,PTPRJ,OCA2,KDM4C,DOCK10,EGFR,RFX3,ANGPT1,CDK12,MACF1,RNF220,DOCK2,NEDD4,MYOF,SND1,CRB1,BCL11A,SOX6,TMEM182,CECR2,ARMC2,CHSY1,FLI1,CDH4,ATP2B2,NTRK3,RXFP1,PHACTR1,FLT1,DNAJC13,GABRB1,PSMA8,EDAR,NEO1,CNTN6,SLC39A12,SLC8A3,PRKD1,PAK1,EPHA7,SPEN,RAPGEF2,LRP2,ADGRB3,DEUP1,RUNX2,ARSB,CPS1,TAOK3,ONECUT1,TMEM38B,ADAMTS1,SMYD3,LRGUK,GRM7,RETREG1,GHR,EPB41L3,COL4A2,SSBP3,TBCD,NEDD4L,HDAC9,ZHX3,APP,ABCB5,RPS6KA2,DCLK1,STAU2,TMC1,SEMA5A,SYT1,VCL,ARHGAP44,NTF3,AURKA,PYGO1,SLC8A1,SRGAP2C,FIG4,KANK1,MAP4K4,BMPR1B,FMN2,THSD7A,AKAP6,CTNNA2,ARNT,PAK3,TTL7,DIP2B,ITPKB,TRPC5,DNM3,RBM47,PRKCZ,KLHL1,DIP2A,COX2A1,ZSWI6,HECW1,ABCA5,PHF19,MRTFA,TAF4B,COBL,EBF2,YAP1,FRYL,SHC4,BRINP1,MAPK1,ADAM22,KMT2E,ALCAM,PLG,NRG3,NCA M1,GFRA1,SYCP1,NIPBL,RNF17,GABPA,FAT3,LCE1F,CHN1,MYLK3,MBNL1,PAFAH1B1,EFEMP1,TLL1,DCAF1,ITGB8,TPM1,NF2,RBFOX1,CTNNA1,PPP1R9A,KLF15,PPARA,MEIS2,NFIB,MRTFB,PTG,SYNJ1,NR5A2,TIAM1,FOXJ3,KAZN,ENAH,SEMA3C,NAV3,TMEM108,ALPK2,JARID2,GATAD2B,DYSF,IL34,ANK2,TANC1,ADGRV1,SYNE2,BBS2,WNT9B,SLC9C1,RANBP3L,SEMA6D,SMARCA4,CDH11,LDB3,PARD3,PIAS1,BLK,TNR,COL22A1,CXADR,ATRX,ELAVL4,ABL1,HDAC4,SLC1A1,SDC2,KCNH1,CRTAC1,DROSHA,L3MBTL3,RAP1A,GLIS1,MORC1,CAMK4,FGF10,GRID2,TGM1,PEAK1,LATS2,NRG1,ASPM,AP3B1,RASGRF1,ATP11C,SYNE1,ZBTB16,MUSK,ZNF675,SH3GL3,PGM5,NXN,USP33,FBN2,PTPRO,ALPK3,TRIO,PDE3A,EXT1,LIMD1,SPRED2,RPS6KA3,CTNND2,NHS,ATP8A2,PTPN2,PLXNA2,HTR2C,ARHGEF7,AMBRA1,OPRM1,HTR2A,FANCA,DAZL,KREMEN1,SEMA3E,MARK2,ALPL,FHL2,PUM1,TMOD2,HERC1,MSH2,CDIN1,EPHA6,ANKRD17,ATL1,CDKN2C,KND C1,BICRAL,AFG3L2,MOSMO,SGCZ,ADAM12,MYLK2,ANK3,HMGA2,MYOM2,BCL11B,DOCK5,ECE1,CREM,MBP,TRPS1,HIP1,CRIM1,FUT9,VAV1,MYT1L,TJP1,LDLRAD4,NPHP4,CNTN1,HLA-B,IQSEC1,SNX3,PDLIM5,BRCA2,DISC1,DNER,WPCP,NRK,SEMA3A,STRN,BMP2,RC3H2,UNC5D,TRAK1,PSG9,PTCD2,MSR1,NCA M2,MSI2,SEMA3D,PDE6C,RELN,HMGB1,FGF9,NFATC2,TDRD7,UST,SLC23A2,ANKRD26,ESRP1,TTC21B,ETS2,DOCK1,B4GALT6,TSPAN2,RAP1GAP,PLS1,SRGAP2,NIN,DRAXIN,ATF1,SLAMF1,S</p> |

|            |                       |                        |                                                                                                                                                                                                                                                                                                                                                                                                                                                                                                                                                                                                                                                                                                                                                                                                                                                                                                                                                                                                                                                                                                                                                                                                                                                                                                                                                                                                                                                                                                                                                                                                                                                                                                                                                                                                                                                                                                                                                                                                                                                                                                                                                                                                                                                                                                                                                                                                                                                                                                                                                                                                                 |
|------------|-----------------------|------------------------|-----------------------------------------------------------------------------------------------------------------------------------------------------------------------------------------------------------------------------------------------------------------------------------------------------------------------------------------------------------------------------------------------------------------------------------------------------------------------------------------------------------------------------------------------------------------------------------------------------------------------------------------------------------------------------------------------------------------------------------------------------------------------------------------------------------------------------------------------------------------------------------------------------------------------------------------------------------------------------------------------------------------------------------------------------------------------------------------------------------------------------------------------------------------------------------------------------------------------------------------------------------------------------------------------------------------------------------------------------------------------------------------------------------------------------------------------------------------------------------------------------------------------------------------------------------------------------------------------------------------------------------------------------------------------------------------------------------------------------------------------------------------------------------------------------------------------------------------------------------------------------------------------------------------------------------------------------------------------------------------------------------------------------------------------------------------------------------------------------------------------------------------------------------------------------------------------------------------------------------------------------------------------------------------------------------------------------------------------------------------------------------------------------------------------------------------------------------------------------------------------------------------------------------------------------------------------------------------------------------------|
|            |                       |                        | <p>MARCA2,ETS1,GLI3,SMARCC1,NHSL1,SLC9A4,PCP4,MYEF2,ZNF431,RERE,MAP2,LAMC1,RRBP1,FARP1,TDRD5,ATF2,HIRA,BBS4,LAMC3,HIVEP3,COL5A1,CFTR,NELL1,KITLG,DCC,MYT1,RCAN1,RORB,DAB1,SELENON,PRKN,MTMR2,SH3PXD2A,TBX20,PCDH15,ZNF541,DPF3,NGEF,GRIN2A,ARID5B,CDH23,PRKCH,IL6R,ALS2,RACGAP1,HEMGN,DMC1,LCE3B,TOX,PTPRB,CATSPERG,TBATA,ITSN2,SOX30,PTGFRN,ARHGEF28,ADGRG6,YIPF6,ROCK1,LYN,VCAM1,CTSB,EIF2B3,PLEKHB2,DTX1,TENM2,OVOL2,PIWIL3,NTN1,ZFH3,DPYSL5,ARID1B,CRACR2A,CASZ1,DMBT1,TFPI1,HECTD1,SHROOM3,HDAC11,PBX3,SNAI2,TANC2,RXRG,SP3,FLNB,TRIM58,TIAL1,ELF2,NREP,ZDHHC17,CERS3,SLC22A14,CD9,KRT6B,TWIST2,IFT81,ENPP1,RASGRP1,DZANK1,NDRG2,BMP5,CSF1,HDGFL3,BCL2L1,SPATA48,CTDP1,HCN1,PRKG1,LAMA3,ASB4,CNMD,SMAD5,CELF4,ABCG1,PRAME,MYCL,TNN,CABYR,PSAP,MICALL2,MED1,KDM6A,ATRN,IL33,AJAP1,ROR2,ZNF521,FAT1,LMX1A,TMEM178A,IL10,ACTR2,PRAMEF25,PTH,SDF4,SOSTDC1,SOHLH1,PACRG,ABHD2,VSTM2A,MAP6,VASP,ETV6,IQAP1,ZBTB7C,ANP32B,YBX3,NRXN1,PCID2,HIPK1,FRY,CADM1,PEG10,LMX1B,ANLN,TWIST1,ALKAL2,JAK2,VXS1,FSTL1,CELSR2,MELTF,ARL11,PCNA,UFL1,ADAMTS5,NFKBIA,NTM,ABCC8,ANXA4,USH1C,NEDD9,OLFM4,ITGA6,GAP43,GRIP1,EML1,MAST2,BBS9,EXT2,KRT6A,GRXCR1,STAT1,NR2C1,MAP2K6,CMTM7,DGKG,MTPN,ABI1,MYO18B,ARMC6,PRAMEF2,POU6F2,IMPACT,ITGA4,BCAP29,FBXL17,ADCYAP1R1,MTF2,NCAPG2,ASB2,MYOCD,CEP120,DHTKD1,CYFIP2,KRT85,MEF2C,ADGRB1,RXRA,WNT7A,RBPMS2,MAP3K5,NDFIP1,MAP3K4,WASF3,S100B,PRDM13,FOXO6,PDE2A,RAB38,FBXW8,SDCBP,NECTIN1,WWOX,NCK1,FLVCR1,FGR,DRC7,PPP2R3A,SPRR2D,RNF8,LCE3D,EPHA4,GABRA5,MECOM,DNMT3L,NTRK2,IL1RAPL1,FNDC3A,RSPH1,NUMB,LHX9,ADAMTS9,WNT2B,CD101,MEGF10,IL17RD,FBXO31,IREB2,HS6ST1,PTK2,CDH5,NFKBID,CLDN18,FEZ2,LAMB1,CYFIP1,UBE3A,SEMA4D,JAM2,FRMD6,FAT4,LRMDA,RUNX1,AKR1B1,WNT5B,ASAP1,FCRLA,DPY19L2,SORBS2,CCDC88A,GPR55,NSUN2,SPAG6,TNFSF11,FYN,NLRP14,UNC45B,ARL13B,HYDIN,UHRF2,HDAC2,GON4L,TBX15,NCS1,COL18A1,DOK5,MAPK9,CRTAM,COL19A1,APELA,MGA2,ROR1,TET1,HECW2,CDH2,CNTN5,ITGA8,NTN4,XRN2,GPR137B,EPHB1,RP1L1,GRM5,RAI14,RPS6KA5,PTPRG,NRP1,SDK1,PRKCA,FAIM,ITGA1,RC3H1,CHODL,POR,BCR,TUT4,NRXN3,SNRK,C14ORF39,FBLN1,PAQR5,MB,RAG1,B9D1,RRAS2,CUX1,MACROH2A1,MITF,EPHB2,CD38,EYA4,MET,CDH17,PPFIA2,ATG5,NRAP,MAGI2,UNK,FLRT2,MYB,KALRN,LAMA1,MFHAS1,ATRN1,TIAM2,BMP7,ASTN2,DLG5,KIRREL3,NUDT21,DDX6,ADGRF5,ABL2,RFX2,EYA1,FHOD3,SLIT2,CCDC141,ERBB4,ROBO1,PBX1,PRKCQ,ANTXR1,NDRG1,SIPA1L3,MGMT,NLGN1,NOS1,EFNA5,TCF12,VCAN,RAB27A,SLIT3,ESR1,NTNG1,LOXL2,NYAP2,PRLR,FOXO1,CAMK1D,PIK3R3,CFAP44,OPCML,CATSPERE,FER,EYA2,CCR2,RPGRIPI1,A2M,SEMA4B,ROCK2,PRDM1,RORA,ATAT1,DMRT1,CATSPER2,HSPG2,PTPRQ,CSMD3,NCOA6,HOKK3,FSTL4,PNPLA3,STK3,ZNF423,HNRNPU,APCDD1,IGF1R,GLI2,THRB,AKAP13,SEPTIN6</p> |
| GO:0048699 | generation of neurons | 1.3202173552473385e-29 | <p>NOTCH2,BRINP3,CNTN4,SPOCK1,LRP12,PTPRD,TRAPPC9,LRRCA4C,MYO9A,ULK2,ZNF536,TENM4,RIPOR2,RP1,STXBP1,BCL2,ALDH1A2,CHRNA7,ROBO2,RIMS1,TENM3,ZEB1,SDCCAG8,USH2A,MINAR1,RIMS2,ALK,AUTS2,ASTN1,NEGR1,CNTNAP2,MAP4,PLP,PR5,DSCAM,RTN1,TCF4,CRKL,SOX5,TNFK,SLC4A10,DOCK10,MACF1,RNF220,NEDD4,CRB1,BCL11A,CECR2,CDH4,ATP2B2,NTRK3,PHACTR1,GABRB1,NEO1,CNTN6,SLC39A12,PRKD1,PAK1,EPHA7,RAPGEF2,LRP2,ADGRB3,RUNX2,ARSB,TAOK3,ADAMTSL1,GRM7,EPB41L3,TBCD,NEDD4L,HDAC9,APP,DCLK1,STAU2,TMC1,SEMA5A,SYT1,VCL,ARHGAP44,NTF3,AURKA,SRGAP2C,FIG4,KANK1,MAP4K4,BMPR1B,CTNNA2,PAK3,DIP2B,TRPC5,DNM3,PRKCZ,KLHL1,DIP2A,ZSWIM6,HECW1,COBL,FRYL,BRINP1,ALCAM,NRG3,NCAM1,GFRA1,NIPBL,FAT3,CHN1,PAFAH1B1,CTNNA1,PPP1R9A,NFIB,PTTG,TIAM1,ENAH,SEMA3C,TMEM108,ADGRV1,WNT9B,SEMA6D,CDH11,PARD3,BLK,TNR,ELAVL4,ABL1,SDC2,CRTA1,RAP1A,GRID2,NRG1,ASPM,RASGRF1,SH3GL3,USP33,PTPRO</p>                                                                                                                                                                                                                                                                                                                                                                                                                                                                                                                                                                                                                                                                                                                                                                                                                                                                                                                                                                                                                                                                                                                                                                                                                                                                                                                                                                                                                                                                                                                                                                                                                                                                                                                                                        |



|            |                                  |                       |                                                                                                                                                                                                                                                                                                                                                                                                                                                                                                                                                                                                                                                                                                                                                                                                                                                                                                                                                                                                                                                                                                                                                                                                                                                                                                                                                                                                                                                                                                                                                                                                                           |
|------------|----------------------------------|-----------------------|---------------------------------------------------------------------------------------------------------------------------------------------------------------------------------------------------------------------------------------------------------------------------------------------------------------------------------------------------------------------------------------------------------------------------------------------------------------------------------------------------------------------------------------------------------------------------------------------------------------------------------------------------------------------------------------------------------------------------------------------------------------------------------------------------------------------------------------------------------------------------------------------------------------------------------------------------------------------------------------------------------------------------------------------------------------------------------------------------------------------------------------------------------------------------------------------------------------------------------------------------------------------------------------------------------------------------------------------------------------------------------------------------------------------------------------------------------------------------------------------------------------------------------------------------------------------------------------------------------------------------|
|            |                                  |                       | <p>,TRIO,EXT1,CTNND2,ATP8A2,PLXNA2,KREMEN1,SEMA3E,MARK2,HERC1,EPHA6,ATL1,KNDC1,AFG3L2,MOSMO,ANK3,BCL11B,ECE1,MBP,FUT9,MYT1L,NPHP4,CNTN1,IQSEC1,SNX3,PDLIM5,DISC1,DNER,WDPCP,NRK,SEMA3A,STRN,BMP2,UNC5D,NCAM2,SEMA3D,PDE6C,RELN,HMGB1,UST,SLC23A2,ESRP1,TTC21B,B4GALT6,TSPAN2,RAP1GAP,PLS1,SRGAP2,NIN,DRAXIN,ATF1,GLI3,PCP4,MYEF2,RERE,MAP2,FARP1,BBS4,DCC,RORB,DAB1,PRKN,MTMR2,TBX20,PCDH15,NGEF,CDH23,ALS2,RACGAP1,TOX,ITSN2,ROCK1,LYN,VCAM1,DTX1,TENM2,NTN1,ZFH3,DPYSL5,CASZ1,PBX3,TANC2,RXRG,NREP,ZDHHC17,DZANK1,BMP5,HDGFL3,HCN1,PRKG1,LAMA3,MYCL,TNN,MICAL2,MED1,ROR2,ZNF521,LMX1A,ACTR2,MAP6,VASP,IQGAP1,NRXN1,HIPK1,FRY,LMX1B,TWIST1,ALKAL2,JAK2,VSX1,CELSR2,NTM,USH1C,ITGA6,GAP43,GRIP1,EML1,GRXCR1,DGKG,MTPN,ABI1,IMPACT,ITGA4,CYFIP2,MEF2C,ADGRB1,WNT7A,S100B,FOXO6,FBXW8,NECTIN1,NCK1,PPP2R3A,EPHA4,GABRA5,NTRK2,IL1RAPL1,NUMB,LHX9,WN T2B,FBXO31,HS6ST1,PTK2,FEZ2,LAMB1,CYFIP1,UBE3A,SEMA4D,FAT4,RUNX1,WNT5B,ASAP1,CCDC88A,SPAG6,FYN,HDAC2,NCS1,DOK5,MDGA2,ROR1,HECW2,CDH2,CNTN5,NTN4,XRN2,EPHB1,RP1L1,RPS6KA5,PTPRG,NRP1,SDK1,ITGA1,CHODL,NRXN3,CUX1,EPHB2,CD38,MET,PPFIA2,MAGI2,UNK,FLRT2,KALRN,LAMA1,TIAM2,BMP7,ASTN2,DLG5,KIRREL3,DDX6,ABL2,EYA1,SLIT2,CCDC141,ERBB4,ROBO1,PBX1,PRKCQ,NLGN1,EFNA5,TCF12,SLIT3,NTNG1,NYAP2,FOXB1,CAMK1D,OPCM1,RPGRI1,SEMA4B,PRDM1,RORA,ATAT1,PTPRQ,CSMD3,FSTL4,IGF1R,GLI2,THRB</p>                                                                                                                                                                                                                                                                                         |
| GO:0031175 | neuron projection development    | 6.151076946157889e-29 | <p>NOTCH2,CNTN4,SPOCK1,LRP12,PTPRD,LRRC4C,MYO9A,ULK2,RIPOR2,STXBP1,BCL2,CHRNA7,ROBO2,RIMS1,TENM3,MINAR1,RIMS2,ALK,AUTS2,NEGR1,CNTNAP2,MAP4,PLPPR5,DSCAM,CRKL,TNIK,DOCK10,MACF1,NEDD4,BCL11A,CECR2,CDH4,NTRK3,PHACTR1,NEO1,CNTN6,SLC39A12,PRKD1,PAK1,EPHA7,RAPGEF2,LRP2,ADGRB3,ARSB,TAOK3,ADAMTSL1,GRM7,EPB41L3,NEDD4L,APP,DCLK1,STAU2,SEMA5A,SYT1,VCL,ARHGAP44,NTF3,AURKA,SRGAP2C,FIG4,KANK1,MAP4K4,BMPR1B,CTNNA2,PAK3,DIP2B,TRPC5,DNM3,PRKCZ,KLHL1,DIP2A,HECW1,COBL,PPYL,ALCAM,NCAM1,GFRA1,FAT3,CHN1,PAFAH1B1,CTNNA1,PPP1R9A,NFIB,PRTG,TIAM1,ENAH,SEMA3C,TMEM108,ADGRV1,SEMA6D,CDH11,PARD3,BLK,TNR,ELAVL4,ABL1,SDC2,CRTAC1,RAP1A,GRID2,RASGRF1,USP33,PTPRO,TRIO,EXT1,CTNND2,ATP8A2,PLXNA2,KREMEN1,SEMA3E,MARK2,HERC1,EPHA6,ATL1,KNDC1,AFG3L2,ANK3,BCL11B,ECE1,MBP,FUT9,CNTN1,IQSEC1,SNX3,PDLIM5,DISC1,NRK,SEMA3A,STRN,UNC5D,NCAM2,SEMA3D,RELN,HMGB1,UST,SLC23A2,B4GALT6,TSPAN2,PLS1,SRGAP2,NIN,DRAXIN,ATF1,GLI3,RERE,MAP2,FARP1,BBS4,DCC,DAB1,PRKN,PCDH15,NGEF,CDH23,ALS2,TOX,ITSN2,ROCK1,LYN,NTN1,DPYSL5,TANC2,NREP,ZDHHC17,BMP5,HDGFL3,PRKG1,LAMA3,TNN,MICAL2,ROR2,LMX1A,ACTR2,MAP6,VASP,IQGAP1,NRXN1,FRY,ALKAL2,JAK2,CELSR2,USH1C,ITGA6,GAP43,GRIP1,GRXCR1,DGKG,ABI1,IMPACT,ITGA4,CYFIP2,MEF2C,ADGRB1,WNT7A,S100B,FOXO6,FBXW8,NECTIN1,NCK1,EPHA4,NTRK2,IL1RAPL1,NUMB,LHX9,FBXO31,PTK2,FEZ2,LAMB1,CYFIP1,UBE3A,SEMA4D,FAT4,ASAP1,CCDC88A,SPAG6,FYN,HDAC2,NCS1,ROR1,HECW2,CDH2,CNTN5,EPHB1,RPS6KA5,PTPRG,NRP1,SDK1,ITGA1,CHODL,NRXN3,CUX1,EPHB2,CD38,PPFIA2,MAGI2,FLRT2,KALRN,LAMA1,TIAM2,BMP7,DLG5,KIRREL3,ABL2,SLIT2,CCDC141,ROBO1,PRKCQ,NLGN1,EFNA5,SLIT3,NTNG1,NYAP2,FOXB1,CAMK1D,SEMA4B,CSMD3,FSTL4,IGF1R,GLI2</p> |
| GO:0032501 | multicellular organismal process | 2.487961724690268e-28 | <p>NOTCH2,BCAR3,BRINP3,MTOR,CNTN4,SPOCK1,SGCD,WWC1,IMMP2L,LRP12,PTPRD,SLC24A2,FREM1,TRAPPC9,BNC2,NEBL,LRRC4C,SMOC1,MYO9A,ULK2,SCAPER,FTO,PLCB1,ZNF536,TAF15,ZFPM2,PIEZO2,TENM4,DLC1,ZDHHC21,RIPOR2,PDE4D,RP1,STXBP1,RALA,IL1RAPL2,BCL2,ODAD2,KCNMA1,PRDM16,ALDH1A2,ARHGAP26,FBN1,F13A1,CHRNA7,ROBO2,RIMS1,SPIRE1,TENM3,GABRB3,ZEB1,AKR1C3,SDCCAG8,RARB,SPRED1,NAV2,ENPEP,SPAG16,MYO1E,PLPPR1,USH2A,MINAR1,RIMS2,ALK,AUTS2,FOXJ2,PJA2,PAPPA2,ERBIN,RHPN2,ASTN1,RIN2,ANO6,CACNG2</p>                                                                                                                                                                                                                                                                                                                                                                                                                                                                                                                                                                                                                                                                                                                                                                                                                                                                                                                                                                                                                                                                                                                                        |

|  |  |  |                                                                                                                                                                                                                                                                                                                                                                                                                                                                                                                                                                                                                                                                                                                                                                                                                                                                                                                                                                                                                                                                                                                                                                                                                                                                                                                                                                                                                                                                                                                                                                                                                                                                                                                                                                                                                                                                                                                                                                                                                                                                                                                                                                                                                                                                                                                                                                                                                                                                                                                                                                                                                                                                                                                                                                                                                                                                                                                                                                                                                                                                                                                                                                                                                                                                                                                                                                                                                                                                               |
|--|--|--|-------------------------------------------------------------------------------------------------------------------------------------------------------------------------------------------------------------------------------------------------------------------------------------------------------------------------------------------------------------------------------------------------------------------------------------------------------------------------------------------------------------------------------------------------------------------------------------------------------------------------------------------------------------------------------------------------------------------------------------------------------------------------------------------------------------------------------------------------------------------------------------------------------------------------------------------------------------------------------------------------------------------------------------------------------------------------------------------------------------------------------------------------------------------------------------------------------------------------------------------------------------------------------------------------------------------------------------------------------------------------------------------------------------------------------------------------------------------------------------------------------------------------------------------------------------------------------------------------------------------------------------------------------------------------------------------------------------------------------------------------------------------------------------------------------------------------------------------------------------------------------------------------------------------------------------------------------------------------------------------------------------------------------------------------------------------------------------------------------------------------------------------------------------------------------------------------------------------------------------------------------------------------------------------------------------------------------------------------------------------------------------------------------------------------------------------------------------------------------------------------------------------------------------------------------------------------------------------------------------------------------------------------------------------------------------------------------------------------------------------------------------------------------------------------------------------------------------------------------------------------------------------------------------------------------------------------------------------------------------------------------------------------------------------------------------------------------------------------------------------------------------------------------------------------------------------------------------------------------------------------------------------------------------------------------------------------------------------------------------------------------------------------------------------------------------------------------------------------------|
|  |  |  | <p>,DLGAP1,NEGR1,MLLT3,GPC6,CNTNAP2,MAP4,MYO3B,APC,HHLA2,TSHZ3,RBFOX3,PLPPR5,DSCAM,RTN1,TCF4,CRKL,ILDR2,SOX5,SETD2,ARHGAP24,TNIK,SLC4A10,PTPRJ,OCA2,KDM4C,DOCK10,EGFR,RFX3,ANGPT1,MACF1,CTNNA3,PRKACB,NCOR1,RNF220,DOCK2,NEDD4,MYOF,SND1,CRB1,BTBD9,BCL11A,SOX6,CECR2,ARMC2,CHSY1,FLI1,CDH4,ATP2B2,NTRK3,RXFP1,C5,TUSC3,PHACTR1,DKK2,FLT1,DNAJC13,ADAMTS6,MAPKBP1,GABRB1,PSMA8,DGKI,EDAR,GRIA1,CRACD,NEO1,CNTN6,SLC39A12,CABLES1,SLC8A3,PRKD1,PAK1,EPHA7,CHRM3,SPEN,RAPGEF2,LRP2,ADGRB3,RUNX2,ARSB,FGF12,GABRA6,CPS1,TAOK3,ONECUT1,TMEM38B,ADAMTSL1,SLC24A3,SLC44A1,LDB2,TAF4A,HERC2,LRGUK,GRM7,RETREG1,RPTOR,GHR,LUZP1,EPB41L3,COL4A2,SSBP3,CELF2,RAPGEF5,TBCD,NEDD4L,PPP1R12B,TRPM1,ADAM10,HDAC9,ZHX3,IL1R1,APBB2,APP,SLC7A2,ABCB5,RPS6KA2,CACNA1C,KDM1B,CACNB2,DCLK1,STAU2,GABRG2,TMC1,MAPRE2,SEMA5A,SYT1,VCL,ARHGAP44,NTF3,CD2AP,AURKA,PARN,PYG01,SLC8A1,HERPUD2,PTPRR,SRGAP2C,FIG4,TAF2A,CMIP,ABC G8,LOXHD1,SRGAP2B,KANK1,KCNE4,MAP4K4,ABCD2,BMPR1B,FMN2,THSD7A,PCSK6,AKAP6,HOMER2,CTNNA2,ARNT,RAB8B,PAK3,RFTN1,TTLL7,DIP2B,KCNK10,ITPKB,TRPC5,RAP1GDS1,RNLS,CHST8,DNM3,NBN,CUBN,IFT57,RBM47,PRKCZ,CALD1,SNTG2,KLHL1,GRB10,DIP2A,MSH6,MCPH1,COL27A1,ZSWIM6,RGS9,HECW1,ABCA5,PHF19,TAF4B,COBL,EBF2,YAP1,ESS2,FRYL,NFIA,BRINP1,MAPK1,HRH2,ADAM22,CRISPLD2,KMT2E,ALCAM,PLG,PAPPA,PDGFD,SYT10,ZNRF3,ABLIM1,NRG3,NCAM1,GFRA1,SYCP1,NIPBL,RNF17,SLC16A1,GABPA,FAT3,CORO2B,CARD18,LCE1F,CHN1,SORCS3,MYLK3,ACSBG1,FMN1,MBNL1,PAFAH1B1,ATF6,EFEMP1,TLL1,DCAF1,ITGB8,TPM1,NF2,RBFOX1,CORIN,CTNNA1,PPP1R9A,ANKRD11,BIRC6,AKAP9,KLF15,PPARA,MEIS2,NFIB,MRTFB,PRTG,SYNJ1,NR5A2,ADAMTS3,TIAM1,GRM1,FOXJ3,KAZN,GABRG1,ENAH,PAK5,SF3B6,PCDH11Y,PLA2R1,SEMA3C,NAV3,SLC24A4,TMEM108,AGO2,ALPK2,DNAH11,JARID2,SCN2A,CPE,IL34,ANK2,TANC1,ADGRV1,MELK,BCAS3,RYR2,SYNE2,BBS2,WNT9B,SLC9C1,RANBP3L,OR4F6,SEMA6D,ANKS6,SMARCA4,CDH11,LDB3,FABP7,PARD3,MAPKAP1,BLK,TNR,COL22A1,GRM8,CXADR,DOCK4,MBD5,ATRX,XIRP2,ELAVL4,ABL1,HDAC4,OXR1,SLC1A1,PRKAA1,SDC2,GAS2,KCNH1,LRFN5,CRTAC1,DROSHA,TTLL5,L3MBTL3,APLF,DNAH5,RAP1A,GLIS1,MORC1,CAMK4,FGF10,ZC3HAV1,GRID2,GALC,TGM1,LATS2,NRG1,INO80D,ASPM,AP3B1,RASGRF1,ATP11C,SYNE1,ZBTB16,MUSK,ZNF675,SH3GL3,SETDB2,PRKC,SLC03A1,MED15,SLMAP,NXN,ESRRG,DGKB,USP33,FBN2,CD44,PTPRO,EGF,ALPK3,ABCC9,P2RX6,TRIO,PDE3A,EXT1,LNPEP,LIMD1,SPRED2,ADAMTS2,RPS6KA3,CTNND2,NHS,ATP8A2,PTPN2,LHFPL3,PLXNA2,OR4F15,ATXN3,ST8SIA6,HTR2C,SLC2A3,ARHGEF7,CD96,ATP8A1,AMBRA1,LTBP1,KDM7A,PKHD1L1,OPRM1,ABCC4,HTR2A,FANCA,CYP4A11,DAZL,CNNM4,KREMEN1,STAC,SEMA3E,MARK2,ALPL,FHL2,PUM1,TMOD2,HERC1,MSH2,IGF2BP3,GNAL,CDIN1,EPHA6,ANKRD17,APBA2,LINGO2,ATL1,SLC2A13,LUC7L,CDKN2C,EPN2,KCND2,EVC,KNDC1,NOS2,BICRAL,AFG3L2,MOSMO,GFRA2,MNAT1,RBBP8,SGCZ,ADAM12,MYLK2,ANK3,EMILIN2,XYL1,HMGA2,MYOM2,BCL11B,DOCK5,F5,ECE1,CREM,MBP,AK8,TRPS1,PLCE1,TGFA,IL17RA,ANKFN1,CRIM1,FUT9,VAV1,MYT1L,FBXO32,ZNF160,TJP1,LDLRA D4,NPHP4,CNTN1,HLA-B,IQSEC1,MTHFD1L,SNX3,CACNA1I,PDLIM5,BRCA2,DISC1,DNER,WPCP,NRK,SLC10A7,SEMA3A,HSF2BP,CFAP97,ADCY10,STRN,OR9Q1,BMP2,RC3H2,UNC5D,TRAK1,PSG9,PTCD2,SCN11A,MSR1,NCAM2,GFI1B,BMP2K,RNF38,SEMA3D,PDE6C,POLR3A,RELN,ARHGAP42,HMGB1,GNAQ,FGF9,NFATC2,TDRD7,UST,CPAMD8,RTTN,MDM1,SLC23A2,MYOM1,TRAF3,ESRP1,UNC13B,TTC21B,ETS2,DOCK1,B4GALT6,TSPAN2,RAP1GAP,PLS1,SRGAP2,NIN,DRAXIN,ATF1,SLAMF1,SMARCA2,ETS1,GLI3,CGAS,MEGF11,SMARCC1,AFF3,SLC9A4,GABRR2,SMOC2,PCP4,CASP5,GRIK2,IDE,MYEF2,RERE,MAP2,DAW1,MYL1,LAMC1,NEK10,RRBP1,FARP1,TD RD5,ATF2,HIRA,CYLD,UMODL1,BBS4,LAMC3,PSG6,COL5A1,CFTR,NELL1,DOP1B,UBASH3A,KITLG,CAMTA1,DCC,MYT1,CHRM5,</p> |
|--|--|--|-------------------------------------------------------------------------------------------------------------------------------------------------------------------------------------------------------------------------------------------------------------------------------------------------------------------------------------------------------------------------------------------------------------------------------------------------------------------------------------------------------------------------------------------------------------------------------------------------------------------------------------------------------------------------------------------------------------------------------------------------------------------------------------------------------------------------------------------------------------------------------------------------------------------------------------------------------------------------------------------------------------------------------------------------------------------------------------------------------------------------------------------------------------------------------------------------------------------------------------------------------------------------------------------------------------------------------------------------------------------------------------------------------------------------------------------------------------------------------------------------------------------------------------------------------------------------------------------------------------------------------------------------------------------------------------------------------------------------------------------------------------------------------------------------------------------------------------------------------------------------------------------------------------------------------------------------------------------------------------------------------------------------------------------------------------------------------------------------------------------------------------------------------------------------------------------------------------------------------------------------------------------------------------------------------------------------------------------------------------------------------------------------------------------------------------------------------------------------------------------------------------------------------------------------------------------------------------------------------------------------------------------------------------------------------------------------------------------------------------------------------------------------------------------------------------------------------------------------------------------------------------------------------------------------------------------------------------------------------------------------------------------------------------------------------------------------------------------------------------------------------------------------------------------------------------------------------------------------------------------------------------------------------------------------------------------------------------------------------------------------------------------------------------------------------------------------------------------------------|

|  |  |  |                                                                                                                                                                                                                                                                                                                                                                                                                                                                                                                                                                                                                                                                                                                                                                                                                                                                                                                                                                                                                                                                                                                                                                                                                                                                                                                                                                                                                                                                                                                                                                                                                                                                                                                                                                                                                                                                                                                                                                                                                                                                                                                                                                                                                                                                                                                                                                                                                                                                                                                                                                                                                                                                                                                                                                                                                                                                                                                                                                                                                                                                                                                                                                                                                                                                                                                                                                                                                                                                                                                                                                                                                                                                                                                                                                                                                                                                                                                                                                                                                                                                                                                                                                                                                                                                                                                                            |
|--|--|--|--------------------------------------------------------------------------------------------------------------------------------------------------------------------------------------------------------------------------------------------------------------------------------------------------------------------------------------------------------------------------------------------------------------------------------------------------------------------------------------------------------------------------------------------------------------------------------------------------------------------------------------------------------------------------------------------------------------------------------------------------------------------------------------------------------------------------------------------------------------------------------------------------------------------------------------------------------------------------------------------------------------------------------------------------------------------------------------------------------------------------------------------------------------------------------------------------------------------------------------------------------------------------------------------------------------------------------------------------------------------------------------------------------------------------------------------------------------------------------------------------------------------------------------------------------------------------------------------------------------------------------------------------------------------------------------------------------------------------------------------------------------------------------------------------------------------------------------------------------------------------------------------------------------------------------------------------------------------------------------------------------------------------------------------------------------------------------------------------------------------------------------------------------------------------------------------------------------------------------------------------------------------------------------------------------------------------------------------------------------------------------------------------------------------------------------------------------------------------------------------------------------------------------------------------------------------------------------------------------------------------------------------------------------------------------------------------------------------------------------------------------------------------------------------------------------------------------------------------------------------------------------------------------------------------------------------------------------------------------------------------------------------------------------------------------------------------------------------------------------------------------------------------------------------------------------------------------------------------------------------------------------------------------------------------------------------------------------------------------------------------------------------------------------------------------------------------------------------------------------------------------------------------------------------------------------------------------------------------------------------------------------------------------------------------------------------------------------------------------------------------------------------------------------------------------------------------------------------------------------------------------------------------------------------------------------------------------------------------------------------------------------------------------------------------------------------------------------------------------------------------------------------------------------------------------------------------------------------------------------------------------------------------------------------------------------------------------------------|
|  |  |  | RCAN1, GTF2I, RORB, TADA2A, DAB1, MED27, SELENON, RB1CC1, M<br>YO3A, PRKN, MTMR2, SH3PXD2A, TBX20, DLGAP2, DACH1, PCDH15,<br>ZNF541, DPF3, LGI2, SMPX, NGEF, GRIN2A, ARID5B, ATXN1, CDH2<br>3, PRKCH, TG, IL6R, ALS2, RACGAP1, OR51E1, ACO1, HEMGN, DMC1<br>, LCE3B, TOX, SHISA9, SLC4A4, PTPRB, CATSPERG, PDE6A, TBATA<br>, SCN10A, SHANK2, VAV3, KCND3, MESD, ITS2N2, SOX30, SYBU, KIR<br>2DL4, NPAS2, ADGRG6, YIPF6, SEC24D, ROCK1, LYN, VCAM1, CTSB<br>, EIF2B3, LRIG1, SLC15A2, DTX1, TENM2, OVOL2, PIWIL3, NTN1,<br>MMP16, ZFHX3, FANCL, DPYSL5, ARID1B, HOXC13, CRACR2A, CASZ<br>1, INSR, OR7A17, YTHDF3, TFF1, HECTD1, GRID1, SHROOM3, XRCC<br>4, COLQ, HDAC11, NMU, PBX3, SNAI2, ASH1L, HOXC4, SIAH2, TANC<br>2, ABCA4, UFD1, RXRG, SP3, GABRG3, MBTPS2, TRIM58, TIAL1, PL<br>PP4, NREP, ZDHHC17, NSD2, CERS3, SLC22A14, CD9, CARD10, KRT<br>6B, JCAD, TWIST2, OR4K2, SAMHD1, IFT81, ENPP1, UTRN, RASGRP<br>1, IGSF11, DZANK1, NDRG2, BMP5, KCNC1, CSF1, GHRH, HDGFL3, B<br>CL2L1, SPATA48, KRT25, CTDP1, HCN1, PRKG1, LAMA3, ASB4, GRI<br>N2B, INO80, CNMD, DHRS3, SMAD5, CELF4, SYNJ2, ABCG1, OR4C46<br>, FOXN3, VSTM4, SLC40A1, MYCL, TNN, CABYR, PSAP, MICALL2, ME<br>D1, KDM6A, ATRN, IL33, AJAP1, ROR2, ZNF521, KL, BANK1, CSDE1<br>, FAT1, OTOG, LMX1A, TMEM178A, IL10, ACTR2, OR1L6, CLSTN2, T<br>TC39C, PTH, SOSTDC1, PRKAA2, CSF2RB, NDC80, SOHLH1, PACRG,<br>ABHD2, MAP6, VASP, PLA2G4A, ETV6, TACC2, IQGAP1, TEAD1, ANP<br>32B, YBX3, AIMP1, NRXN1, PCID2, HIPK1, DGKK, FRY, CIBAR1, PB<br>LD, CACYBP, CADM1, SSPN, LMX1B, ANLN, TWIST1, AKT3, ALKAL2,<br>JAK2, ADAM28, VSX1, FSTL1, ISX, BPNT1, SVEP1, HCTR1, RBM19<br>, PTGS1, ZNF287, CELSR2, ZNF449, PRSS2, FH, CREBBP, ARL11, G<br>ORAB, PCNA, SIAH3, TRPV5, UFL1, ADAMTS5, NFKBIA, PRKCB, OR2<br>T3, NTM, ABCC8, ANXA4, SMTN, ALX4, USH1C, SMPD4, NEDD9, ITGA<br>6, ATP2B1, GAP43, ASS1, GRIP1, CTNBNB1, ADCY9, EML1, PPP1R1<br>7, MAST2, OTOP1, CIDEA, BBS9, EXT2, KRT6A, STOX2, AGO1, MEOX<br>2, SLC6A1, GRXCR1, STAT1, BRMS1L, MAP2K6, CMTM7, DGKG, SHRO<br>OM2, SLC6A11, MTPN, ABI1, MYO18B, ARMC6, CEMIP, POU6F2, IMP<br>ACT, CCBE1, PARK7, ADAMTS18, ITGA4, BCAP29, FBXL17, POU1F1<br>, ADCYAP1R1, MTF2, CSMD1, NCAPG2, NDC1, OR6C75, FOXF2, ASB2<br>, MYOCD, HMCN1, CEP120, MYH13, DHTKD1, CYFIP2, ACACA, KRT85<br>, ST8SIA4, OR13C9, MEF2C, ADGRB1, RXRA, WNT7A, RBPM52, NDFI<br>P1, MAP3K4, WASF3, S100B, PRDM13, FOXO6, PKN2, OR10H2, PDE2<br>A, FBXW8, SDCBP, NECTIN1, DSG1, WWOX, PASK, NCK1, FLVCR1, FG<br>R, DRC7, PPP2R3A, TOP1, SPRR2D, RNF8, LCE3D, EPHA4, PPIP5K2<br>, GABRA5, MECOM, DNMT3L, NTRK2, IL1RAPL1, FNDC3A, RSPH1, NU<br>MB, LHX9, ADAMTS9, WNT2B, TNNI1, OCLN, CD101, SHISA6, IL17R<br>D, FBXO31, AKAP11, GRIK1, PRKAB1, IREB2, HS6ST1, PTK2, MARK<br>4, CDH5, APOL2, NFKBID, CLDN18, DIAPH1, FEZ2, LAMB1, CYFIP1<br>, UBE3A, HOATZ, PCDH8, SEMA4D, JAM2, ZBTB20, FAT4, AP2B1, RU<br>NX1, AKR1B1, KIRREL1, WNT5B, AMFR, SLC26A2, PTGFR, OR4L1, S<br>ANBR, ASAP1, NOS1AP, MTTP, DPY19L2, SORBS2, PDCL3, CCDC88A<br>, GPR55, NSUN2, ADAMTS16, SPAG6, SLC5A1, OR11G2, TNFSF11, F<br>YN, KDM5A, NLRP14, PPM1F, ADGRL2, UNC45B, ARL13B, HYDIN, SC<br>N8A, HDAC2, SNTB1, GON4L, TBX15, TMEM63C, NCS1, COL18A1, LH<br>FPL2, ATP5PF, ALB, DOK5, UGP2, CRTAM, COL19A1, APELA, MDGA2<br>, TRPM3, SLC39A8, ROR1, OPA3, FUT8, TET1, ARNT2, ASB3, HECW2<br>, POTEJ, CDH2, CNTN5, ITGA8, FBXL20, NTN4, XRN2, PHLPP1, GPR<br>137B, EPHB1, EYS, RP1L1, GRM5, RAI14, RPS6KA5, PTPRG, NRP1,<br>SDK1, PRKCA, ATPSCMT, FAIM, ITGA1, RC3H1, NRIP1, CHODL, PO<br>R, MCC, BCR, TUT4, NRXN3, KIF16B, SNRK, C14ORF39, FBLN1, STK<br>36, PAQR5, MB, RAG1, B9D1, DGCR2, RRAS2, BMPER, CUX1, MACROH<br>2A1, MITF, EPHB2, IGSF3, SGCG, CD38, EYA4, MYO5B, MET, CDH17<br>, SPECC1, PPFIA2, CDH13, SERPINB2, CACNG3, ATG5, NRAP, MAGI<br>2, KIAA1217, VMP1, UNK, ADAM29, MLIP, FLRT2, MYB, KALRN, SLC<br>1A2, GNAS, LAMA1, MFHAS1, GREB1L, SERPINB7, CA10, TIAM2, IG<br>SF21, BMP7, CHIT1, ASTN2, DLG5, GABRA2, KIRREL3, BTBD, OR2T2<br>, BPTF, AK3, TMEM25, NUDT21, DDX6, ADGRF5, OR4N2, PDGFC, ABL<br>2, TRAPPC6B, RFX2, NECAB1, EYA1, FHOD3, SLIT2, TMPRSS3, EXO<br>C4, FAM126A, CCDC141, PLCL1, ERBB4, IL20RB, TRHDE, SYNDIG1<br>, ROBO1, PBX1, PRKCQ, ANTXR1, NDRG1, MYH15, SIPA1L3, TRDN, N<br>LGN1, CTTNBP2, SHLD2, NOS1, SLC6A3, ASIC2, EFNA5, TCF12, AR |
|--|--|--|--------------------------------------------------------------------------------------------------------------------------------------------------------------------------------------------------------------------------------------------------------------------------------------------------------------------------------------------------------------------------------------------------------------------------------------------------------------------------------------------------------------------------------------------------------------------------------------------------------------------------------------------------------------------------------------------------------------------------------------------------------------------------------------------------------------------------------------------------------------------------------------------------------------------------------------------------------------------------------------------------------------------------------------------------------------------------------------------------------------------------------------------------------------------------------------------------------------------------------------------------------------------------------------------------------------------------------------------------------------------------------------------------------------------------------------------------------------------------------------------------------------------------------------------------------------------------------------------------------------------------------------------------------------------------------------------------------------------------------------------------------------------------------------------------------------------------------------------------------------------------------------------------------------------------------------------------------------------------------------------------------------------------------------------------------------------------------------------------------------------------------------------------------------------------------------------------------------------------------------------------------------------------------------------------------------------------------------------------------------------------------------------------------------------------------------------------------------------------------------------------------------------------------------------------------------------------------------------------------------------------------------------------------------------------------------------------------------------------------------------------------------------------------------------------------------------------------------------------------------------------------------------------------------------------------------------------------------------------------------------------------------------------------------------------------------------------------------------------------------------------------------------------------------------------------------------------------------------------------------------------------------------------------------------------------------------------------------------------------------------------------------------------------------------------------------------------------------------------------------------------------------------------------------------------------------------------------------------------------------------------------------------------------------------------------------------------------------------------------------------------------------------------------------------------------------------------------------------------------------------------------------------------------------------------------------------------------------------------------------------------------------------------------------------------------------------------------------------------------------------------------------------------------------------------------------------------------------------------------------------------------------------------------------------------------------------------------------------|

|            |                       |                       |                                                                                                                                                                                                                                                                                                                                                                                                                                                                                                                                                                                                                                                                                                                                                                                                                                                                                                                                                                                                                                                                                                                                                                                                                                                                                                                                                                                                                                                                                                                                                                                                                                                                                                                                                                                                                                                                                                                                                                                                                                                                                                                                                                                                                                                                                                                                                                                                                                                                                                                                                                                                                                                                                                                                                                                                                                                                                                                                                                                                                             |
|------------|-----------------------|-----------------------|-----------------------------------------------------------------------------------------------------------------------------------------------------------------------------------------------------------------------------------------------------------------------------------------------------------------------------------------------------------------------------------------------------------------------------------------------------------------------------------------------------------------------------------------------------------------------------------------------------------------------------------------------------------------------------------------------------------------------------------------------------------------------------------------------------------------------------------------------------------------------------------------------------------------------------------------------------------------------------------------------------------------------------------------------------------------------------------------------------------------------------------------------------------------------------------------------------------------------------------------------------------------------------------------------------------------------------------------------------------------------------------------------------------------------------------------------------------------------------------------------------------------------------------------------------------------------------------------------------------------------------------------------------------------------------------------------------------------------------------------------------------------------------------------------------------------------------------------------------------------------------------------------------------------------------------------------------------------------------------------------------------------------------------------------------------------------------------------------------------------------------------------------------------------------------------------------------------------------------------------------------------------------------------------------------------------------------------------------------------------------------------------------------------------------------------------------------------------------------------------------------------------------------------------------------------------------------------------------------------------------------------------------------------------------------------------------------------------------------------------------------------------------------------------------------------------------------------------------------------------------------------------------------------------------------------------------------------------------------------------------------------------------------|
|            |                       |                       | HGEF11,VCAN,RAB27A,EHMT1,SLIT3,DTNA,ESR1,DNAH9,NTNG1,KDM4B,LOXL2,CACNA2D1,NYAP2,PRLR,HTT,FOXB1,RAD51B,CAMK1D,PIK3R3,MACROD2,CFAP44,OPCML,CATSPERE,HLA-F,FER,EYA2,KATNIP,CCR2,RPGRIP1,STARD13,A2M,EPS8,SEMA4B,HRH1,PHC2,ROCK2,PRDM1,RORA,STMP1,IL16,ATAT1,DMRT1,PPP1CB,CATSPER2,HSPG2,PTPRQ,CSMD3,NCOA6,HSD17B2,COL4A3,RGS7,HOKK3,PCSK2,FSTL4,BARD1,CLCN5,STK3,ZNF423,ZNF568,HNRNPU,VTI1A,APCDD1,IGF1R,GLI2,THRB,LSAMP,AKAP13,MORC3,SEPTIN6,DNM1L                                                                                                                                                                                                                                                                                                                                                                                                                                                                                                                                                                                                                                                                                                                                                                                                                                                                                                                                                                                                                                                                                                                                                                                                                                                                                                                                                                                                                                                                                                                                                                                                                                                                                                                                                                                                                                                                                                                                                                                                                                                                                                                                                                                                                                                                                                                                                                                                                                                                                                                                                                            |
| GO:0065007 | biological regulation | 5.290972093177678e-27 | NOTCH2,BCAR3,BRINP3,MTOR,UNC80,CNTN4,CACNA2D3,SPOCK1,NSG1,SGCD,WWC1,ABCA13,GARNL3,LRP12,PTPRD,SLC24A2,TRAPPC9,BNC2,PVT1,LRRC4C,KCNH5,MICU2,ANKS1B,SMOC1,MYO9A,ULK2,NLK,LONP2,UNC13C,FTO,KSR1,MGA,RFX7,ZNF236,PLCB1,ZNF536,MX2,TMPRSS2,TAF4A5,SVIL,CLTCL1,ZFPM2,PIEZO2,TENM4,L3MBTL4,DLC1,TNRC6B,DPP10,ZDHHC21,PTPRA,ITPR2,RIPOR2,PDE4D,RDX,RP1,STXBP1,ERC1,RALA,IL1RAPL2,BCL2,ODAD2,KCNMA1,PRDM16,ALDH1A2,ARHGAP26,FBN1,LRFN2,F13A1,GPHN,CDH8,CHRNA7,DCDC1,GPR158,ROBO2,RIMS1,PIK3C3,EPC2,SPIRE1,TENM3,GABRB3,ZEB1,AKR1C3,SDCCAG8,RARB,FGD4,SPRED1,NAV2,ENPEP,MYO1E,PLPPR1,USH2A,MINAR1,CDC42EP3,RIMS2,ALK,AUTS2,ADGRE1,FOXJ2,CDYL2,CARMIL1,MCTP1,PJA2,BABAM2,PAPPA2,GLIS3,FANK1,ERBIN,RHPN2,RIN2,PARVB,ANO6,CACNG2,DLGAP1,NEGR1,ZNF880,MLLT3,EGLN3,GPC6,SUSD4,CNTNAP2,MAP4,MAP3K9,SPON1,APC,ZMYM4,ZNF595,HHLA2,TSHZ3,RBFOX3,PLPPR5,DSCAM,RTN1,TCF4,CRKL,ILDR2,SOX5,SETD2,ERG,ARHGAP24,ZNF573,TNIIK,SLC4A10,PTPRJ,KDM4C,NEK4,DOCK10,TSHZ2,EGFR,ZNF280B,RFX3,DENND1A,USP14,ANGPT1,CDK12,BACH1,MACF1,CTNNA3,PRKACB,NEK7,RGS3,NCOR1,RNF220,DOCK2,ZNF407,NEDD4,MAML2,MTRF1,SND1,SCAI,CRB1,NSMCE2,BTBD9,BCL11A,SOX6,FAM83F,TMEM182,SGMS1,GRIK3,CHSY1,FLI1,RPRD1A,CDH4,ATP2B2,NTRK3,LARGE1,RXFP1,C5,PDE1C,ZFAND6,CYP2C9,PHACTR1,DKK2,FLT1,DNAJC13,ZNF648,RFC3,RABEP1,ZNF382,TASP1,THRAP3,MAPKBP1,AOAH,GABRB1,PSMA8,DGKI,INVS,C12ORF4,EDAR,GRIA1,CRACD,CAST,TTC39B,NUP214,NEO1,CNTN6,SLC39A12,CABLES1,SLC8A3,MALRD1,TOM1L2,NELL2,PRKD1,TBC1D19,TPTE2,PAK1,GMDS,EPAH7,CTNNAL1,NCOA7,KHDRBS2,CHRM3,GRAMD1B,RALGPS1,SPEN,RAPGEF2,PELI2,LRP2,ADGRB3,RUNX2,ARSB,FGF12,GABRA6,CPS1,TAOK3,ONECUT1,LDLRAD3,CPEB4,TMEM38B,PRICKLE2,SLC24A3,UBE2L3,LDB2,TAF4A,PP2R2B,BTBD11,PUM3,PTPRN2,SYN2,CCL28,SMYD3,PATJ,HERC2,GRM7,SEPTIN9,RETREG1,RPTOR,TMEM117,GHR,EPB41L3,THADA,COL4A2,SSBP3,RALGAP1,CELF2,RAPGEF5,TBCD,NEDD4L,PPP1R12B,TRPM1,ADAM10,HDAC9,ZHX3,ATF7IP,IL1R1,APBB2,PHACTR2,APP,ABCB5,RPS6KA2,SAMSN1,CACNA1C,KDM1B,CANB2,KLHL13,MTUS1,DCLK1,STAU2,GABRG2,DOCK8,TMC1,MAPRE2,ZNF600,USP18,SEMA5A,SYT1,VCL,ARHGAP44,NTF3,ACER2,PARP15,NDUFAF2,CD2AP,ZNF723,AURKA,PARN,CFDP1,ST18,PYGO1,SLC8A1,HERPUD2,SSBP2,PTPRR,SRGAP2C,ANKRD31,FIG4,DUX4,TAF4A,ABCG8,SERPINA6,PLGRKT,SRGAP2B,KANK1,KCNE4,MAP4K4,HIVEP2,ABCD2,BMPRI1B,FMN2,PCSK6,AKAP6,HOMER2,ZNF717,CTNNA2,ARNT,RAB8B,PAK3,RFTN1,PDE1A,ZNF257,DIP2B,KCNK10,RANBP2,LARP1,ITPKB,TRPC5,RGS20,PDE10A,UBE2E2,RAP1GDS1,HHAT,RNLS,CLIC6,CHST8,KICS2,ERC2,DNM3,NBN,CUBN,SCP2,SYN3,IFT57,INTS7,PRKCZ,SPOP,BTLA,GRB10,RYR3,TAF15,DIP2A,MSH6,MCPH1,ARHGAP32,RAB27B,CNST,RGS9,HECW1,DEFA3,MBNL2,ABCA5,PHF19,MRTFA,TAF4B,COBL,SENP6,DUSP22,EBF2,YAP1,NFIA,WDR70,PPM1L,RIPK4,ZKSCAN5,SHC4,BRINP1,MAPK1,MGAT5,CADPS2,KCNJ1,HRH2,RABGAP1L,ITIH5,TRPC7,ADAM22,USP25,KMT2E,ALCAM,PLG,PCGF5,PDGFD,SYT10,ZNRF3,PPP1R1C,ITGBL1,ARHGEF17,NRG3,UBE2O,SFMBT2,MIR663AHG,ANKFY1,NCAM1,GFRA1,SYCP1,NIPBL,SLC16A1,SPIDR,EWSR1,GABPA,FAT3,MICU1,ZNF735,CORO2B,CARD18,CHD6,STK38,PTPN13,TBC1D22A,CHN1,HRH4,SORCS3,MYLK3,KANSL1,GLP2R,LIMCH1,FMN1,ECT2L,MBNL1,PAFAH1B1,ATF6,EFEMP1,ZNF684,TM7SF3,DCAF1,ITGB8,STON2, |

|  |  |  |                                                                                                                                                                                                                                                                                                                                                                                                                                                                                                                                                                                                                                                                                                                                                                                                                                                                                                                                                                                                                                                                                                                                                                                                                                                                                                                                                                                                                                                                                                                                                                                                                                                                                                                                                                                                                                                                                                                                                                                                                                                                                                                                                                                                                                                                                                                                                                                                                                                                                                                                                                                                                                                                                                                                                                                                                                                                                                                                                                                                                                                                                                                                                                                                                                                                                                                                                                                                                                                                                                                                                                                                                                                                                                                                                                                                                                                                                                 |
|--|--|--|-------------------------------------------------------------------------------------------------------------------------------------------------------------------------------------------------------------------------------------------------------------------------------------------------------------------------------------------------------------------------------------------------------------------------------------------------------------------------------------------------------------------------------------------------------------------------------------------------------------------------------------------------------------------------------------------------------------------------------------------------------------------------------------------------------------------------------------------------------------------------------------------------------------------------------------------------------------------------------------------------------------------------------------------------------------------------------------------------------------------------------------------------------------------------------------------------------------------------------------------------------------------------------------------------------------------------------------------------------------------------------------------------------------------------------------------------------------------------------------------------------------------------------------------------------------------------------------------------------------------------------------------------------------------------------------------------------------------------------------------------------------------------------------------------------------------------------------------------------------------------------------------------------------------------------------------------------------------------------------------------------------------------------------------------------------------------------------------------------------------------------------------------------------------------------------------------------------------------------------------------------------------------------------------------------------------------------------------------------------------------------------------------------------------------------------------------------------------------------------------------------------------------------------------------------------------------------------------------------------------------------------------------------------------------------------------------------------------------------------------------------------------------------------------------------------------------------------------------------------------------------------------------------------------------------------------------------------------------------------------------------------------------------------------------------------------------------------------------------------------------------------------------------------------------------------------------------------------------------------------------------------------------------------------------------------------------------------------------------------------------------------------------------------------------------------------------------------------------------------------------------------------------------------------------------------------------------------------------------------------------------------------------------------------------------------------------------------------------------------------------------------------------------------------------------------------------------------------------------------------------------------------------|
|  |  |  | <p> VPS13D,CCNG2,TLK1,TPM1,NF2,LRR38,CNKSR2,GRIK4,RBFO<br/> X1,HIVEP1,CORIN,CTNNA1,PPP1R9A,MOB3B,BIRC6,AKAP9,KL<br/> F15,RASGRF2,PPARA,MEIS2,SNX30,NFIB,KCNS3,ERMP1,MRTF<br/> B,PPP6R3,PRTG,RGL1,SYNJ1,NR5A2,ADAMTS3,TIAM1,ARAP2,<br/> GRM1,FOXJ3,PTPRK,ARHGEF12,GABRG1,PAK5,TRERF1,PCDH11<br/> Y,PPP2R5E,PLA2R1,EIF3D,SEMA3C,DAPK1,NAV3,SLC24A4,SE<br/> C14L1,VPS13C,TMEM108,AGO2,STK32B,PHC3,MAGI1,ALPK2,D<br/> NAH11,JARID2,SCN2A,RIC8B,TBC1D9,RAB22A,SORCS1,DNAJC<br/> 15,GATAD2B,CPE,EVC2,DYSF,IL34,ANK2,BRWD1,TANC1,ADGR<br/> V1,ZNF846,MELK,BCAS3,RYR2,SYNE2,BBS2,WNT9B,ZNF606,S<br/> LC9C1,CLPX,RANBP3L,OR4F6,NKAIN3,NGK7,SEMA6D,NBEA,DU<br/> SP16,SMARCA4,CDH11,USP8,FABP7,PAR3,MAPKAP1,TNRC6C,<br/> PIAS1,TBC1D5,SPG21,BLK,EBF1,TNR,GRM8,DST,CXADR,DOCK<br/> 4,MBD5,ATRX,NUAK1,PTPRT,ELAVL4,ABL1,MXI1,PTPN12,HDA<br/> C4,OXR1,SLC1A1,PRKAA1,SDC2,GAS2,SLC12A8,KCNH1,ITGB3<br/> BP,MRPS27,LRFN5,CREG1,DROSHA,APBB1IP,ANO4,L3MBTL3,D<br/> MXL2,EIPR1,APLF,NFAT5,MAST4,GUCY1A2,NBAS,PSMF1,SLFN<br/> 11,RAP1A,NKAIN2,GLIS1,MORC1,MYO10,GPC5,TOX3,CAMK4,B<br/> AZ2A,INPP5A,CPSF3,FGF10,ZC3HAV1,GRID2,TGM1,PEAK1,LA<br/> TS2,NRG1,INO80D,SGS1L,CLIP1,ASPM,AP3B1,DENND2B,RASG<br/> RF1,PAH,ATP11C,ZNF438,ABCB7,ZBTB16,MUSK,KIR3DL2,ZNF<br/> 675,GNNG7,SMARCA1,SH3GL3,SETDB2,PRKCE,FOXK2,SLC3A1<br/> ,ASAP2,MED15,SLMAP,NXN,WNK2,ESRRG,ZNF718,DGKB,USP33<br/> ,DENND4C,FBN2,CD44,RGS12,PTPRO,EGF,PRRC1,ABCC9,P2RX<br/> 6,TRIO,PDE3A,EXT1,STXBP6,NSMAF,LNPEP,LIMD1,PEX14,SP<br/> RED2,RPS6KA3,CTNND2,ATP8A2,SCG5,MTMR3,PTPN2,TRIM5,P<br/> LXNA2,MCF2L,OR4F15,ATXN3,RFC1,HTR2C,RIC3,CLEC16A,AR<br/> HGEF7,CD96,ALG10B,ATP8A1,AMBRA1,LTBP1,STK38L,ZFYVE9<br/> ,KDM7A,OPRM1,PRMT8,HTR2A,PLCXD3,FANCM,FANCA,CYBRD1,<br/> CYP4A11,DAZL,INPP4B,GTFF2F2,PPP2R2C,CNNM4,KREMEN1,ST<br/> AC,SEMA3E,TAF3,RPRD1B,MARK2,GCSAML,TMEM67,EBF3,ALPL<br/> ,ZNF33B,C10ORF90,FHL2,ABHD17C,ADGRA3,CNIH3,PUM1,TMO<br/> D2,HERC1,MSH2,IGF2BP3,GNAL,CDIN1,EPHA6,ANKRD17,APBA<br/> 2,MAIP1,LINGO2,ZNF397,SH3KBP1,SLC2A13,LUC7L,RELL1,H<br/> IPK3,CDKN2C,EPN2,KCND2,EVC,GRK3,KNDC1,SPSB4,CLSPN,N<br/> OS2,BICRAL,AFG3L2,STK10,MOSMO,GFRA2,MNAT1,TMEM116,R<br/> BBP8,MDFIC,SGCZ,TMTC2,ADAM12,MYLK2,ANK3,EMILIN2,HMG<br/> A2,CCND3,BCL11B,VPS41,DOCK5,F5,ECE1,ZIM3,STK32A,CRE<br/> M,LYPLA1,MBP,LINCO1151,TRPS1,TRAPPC11,PLCE1,TGFA,IL<br/> 17RA,ANKFN1,HIP1,CRIM1,FUT9,PRR5L,GSR,ATP6V1E1,UTP4<br/> ,CAPN5,VAV1,RUFY2,MYT1L,FBXO32,ZNF160,TJP1,LDLRAD4,<br/> NPHP4,EGFLAM,PACSIN2,CNTN1,HLA-<br/> B,IQSEC1,HSF5,SNX3,CACNA1I,NAA35,ZNF367,PDLIM5,KCNJ<br/> 15,BRCA2,DISC1,ZBTB2,DNER,BLM,ASB7,WDPCP,NRK,SLC10A<br/> 7,SEMA3A,MAGI3,INTS8,LIN54,ADCY10,PSG8,STRN,OR9Q1,Z<br/> NF121,STX12,PHACTR3,BMP2,RC3H2,UNC5D,ATP9A,TRAK1,PS<br/> G9,CDC42BPB,SOGA1,EVI5,PTCD2,SCN11A,MSR1,VRR1,GNAI1<br/> ,RALGAP2,SGSM1,ZC3H14,GFI1B,TBC1D4,RANBP9,RESF1,MY<br/> RIP,TTR,RIN3,BMP2K,TMEM161A,SEMA3D,ASXL3,NETO2,PDE6<br/> C,CABIN1,POLR3A,LEMD3,RELN,ARHGAP42,HMGB1,GNAQ,FGF9<br/> ,NFATC2,TDRD7,SH3BP5,UST,CPAMD8,MDM1,SLC23A2,POLR2M<br/> ,ZNF106,MYOM1,ZNF567,TRAF3,ZNF462,ANKRD26,ESRP1,UNC<br/> 13B,TTC21B,ETS2,UBAP2L,GEMIN5,ZNF875,DSTYK,UIMC1,DO<br/> CK1,LRRFIP1,RAP1GAP,PLS1,SRGAP2,IKZF2,SEC23B,SLC39A<br/> 6,NIN,DRAXIN,ATF1,CCDC186,SLAMF1,KCNH8,SMARCA2,ETS1<br/> ,FAM83B,GLI3,CGAS,SMARCC1,SNX6,AFF3,SLC9A4,GABRR2,S<br/> MOC2,PCP4,CNKSR3,CASP5,VENTX,GRIK2,IDE,WDR12,MCTP2,<br/> KIF15,PRDM10,CUL1,MYEF2,ZFYVE26,ZNF431,RERE,PSD3,MA<br/> P2,BTAF1,GAREM1,PEX6,LAMC1,ZNF618,NEK10,FARP1,MOB1B<br/> ,ATF2,HIRA,CYLD,UMODL1,BBS4,MAPK8IP1,MX1,PSG6,HIVEP<br/> 3,COL5A1,GABBR2,PSIP1,ITGA9,CFTR,KPNA1,NELL1,ME2,TB<br/> C1D13,UBASH3A,RGMB,NEU3,MRPL13,KITLG,ZZEF1,DNAJC7,A<br/> TP10B,CAMTA1,UBR1,DCC,MYT1,CHRM5,MAP4K3,YLPM1,SLC30<br/> A10,RCAN1,GTFF2I,RORB,TADA2A,DAB1,MED27,ZNF208,SELEN<br/> ON,RB1CC1,NMD3,AKAP10,PTPRE,PRKN,MTMR2,ZNF608,SH3PX<br/> D2A,TBX20,SP110,DLGAP2,AFAP1,MAPK10,DACH1,PCDH15,ZN </p> |
|--|--|--|-------------------------------------------------------------------------------------------------------------------------------------------------------------------------------------------------------------------------------------------------------------------------------------------------------------------------------------------------------------------------------------------------------------------------------------------------------------------------------------------------------------------------------------------------------------------------------------------------------------------------------------------------------------------------------------------------------------------------------------------------------------------------------------------------------------------------------------------------------------------------------------------------------------------------------------------------------------------------------------------------------------------------------------------------------------------------------------------------------------------------------------------------------------------------------------------------------------------------------------------------------------------------------------------------------------------------------------------------------------------------------------------------------------------------------------------------------------------------------------------------------------------------------------------------------------------------------------------------------------------------------------------------------------------------------------------------------------------------------------------------------------------------------------------------------------------------------------------------------------------------------------------------------------------------------------------------------------------------------------------------------------------------------------------------------------------------------------------------------------------------------------------------------------------------------------------------------------------------------------------------------------------------------------------------------------------------------------------------------------------------------------------------------------------------------------------------------------------------------------------------------------------------------------------------------------------------------------------------------------------------------------------------------------------------------------------------------------------------------------------------------------------------------------------------------------------------------------------------------------------------------------------------------------------------------------------------------------------------------------------------------------------------------------------------------------------------------------------------------------------------------------------------------------------------------------------------------------------------------------------------------------------------------------------------------------------------------------------------------------------------------------------------------------------------------------------------------------------------------------------------------------------------------------------------------------------------------------------------------------------------------------------------------------------------------------------------------------------------------------------------------------------------------------------------------------------------------------------------------------------------------------------------|

|  |  |  |                                                                                                                                                                                                                                                                                                                                                                                                                                                                                                                                                                                                                                                                                                                                                                                                                                                                                                                                                                                                                                                                                                                                                                                                                                                                                                                                                                                                                                                                                                                                                                                                                                                                                                                                                                                                                                                                                                                                                                                                                                                                                                                                                                                                                                                                                                                                                                                                                                                                                                                                                                                                                                                                                                                                                                                                                                                                                                                                                                                                                                                                                                                                                                                                                                                                                                                                                                                                                                                                                                                                                                                                                                                                                                                                                                                  |
|--|--|--|----------------------------------------------------------------------------------------------------------------------------------------------------------------------------------------------------------------------------------------------------------------------------------------------------------------------------------------------------------------------------------------------------------------------------------------------------------------------------------------------------------------------------------------------------------------------------------------------------------------------------------------------------------------------------------------------------------------------------------------------------------------------------------------------------------------------------------------------------------------------------------------------------------------------------------------------------------------------------------------------------------------------------------------------------------------------------------------------------------------------------------------------------------------------------------------------------------------------------------------------------------------------------------------------------------------------------------------------------------------------------------------------------------------------------------------------------------------------------------------------------------------------------------------------------------------------------------------------------------------------------------------------------------------------------------------------------------------------------------------------------------------------------------------------------------------------------------------------------------------------------------------------------------------------------------------------------------------------------------------------------------------------------------------------------------------------------------------------------------------------------------------------------------------------------------------------------------------------------------------------------------------------------------------------------------------------------------------------------------------------------------------------------------------------------------------------------------------------------------------------------------------------------------------------------------------------------------------------------------------------------------------------------------------------------------------------------------------------------------------------------------------------------------------------------------------------------------------------------------------------------------------------------------------------------------------------------------------------------------------------------------------------------------------------------------------------------------------------------------------------------------------------------------------------------------------------------------------------------------------------------------------------------------------------------------------------------------------------------------------------------------------------------------------------------------------------------------------------------------------------------------------------------------------------------------------------------------------------------------------------------------------------------------------------------------------------------------------------------------------------------------------------------------|
|  |  |  | <p> F541,DPF3,NGEF,HEPHL1,GRIN2A,ARID5B,ZBED9,JPH1,TXNR<br/> D2,ATXN1,WSB1,CDH23,LALBA,PRKCH,PKP1,HUNK,SLC12A1,F<br/> RMD4A,TG,IL6R,FRMPD4,ALS2,RACGAP1,NLRC5,ZNF627,OR51<br/> E1,ACO1,TFDP1,DHRS11,CNOT6L,MKNK1,HEMGN,KANK4,DOCK9<br/> ,SNX25,HULC,FBLN5,KCNQ3,TOX,SHISA9,SLC4A4,PTPRB,ZFP<br/> 90,PDE6A,COPS8,ZNF124,SCN10A,SHANK2,ST8SIA1,USP7,VA<br/> V3,PSMA1,ENPP3,PLAGL1,KCND3,HAAO,MESD,ITSN2,SOX30,M<br/> OK,KIR2DL4,ARHGEF28,RALB,NPAS2,ADGRG6,DENND2C,PPA2,<br/> ROCK1,LYN,VCAM1,SEL1L,ARHGAP28,ARHGAP31,ZNF780B,CTS<br/> B,EIF2B3,TTC37,SLC44A2,SUMO3,SLC15A2,ZNF169,PLEKHB2<br/> ,KIF11,DTX1,BZW1,TENM2,OVOL2,PIWIL3,ZBTB33,ADA2,NTN<br/> 1,PLCB4,MMP16,ZFHX3,FANCL,DPYSL5,ZNF44,RRAGD,BANP,S<br/> UPT16H,ARID1B,HOXC13,CRACR2A,RNF152,BAZ1A,CASZ1,OTU<br/> D7A,INSR,CUL5,OR7A17,BMF,YTHDF3,TFF1,DEDD2,NEK6,HEC<br/> TD1,GRID1,SHROOM3,XRCC4,COLQ,NMU,DDHD1,PBX3,SUMO2,H<br/> S1BP3,ZNF292,ARFGEF1,PDE4DIP,GAST,POGK,SNAT2,ASH1L,<br/> IGHV3-<br/> 74,HOXC4,BID,SIAH2,RPH3A,TANC2,ABCA4,TRABD2B,UFD1,R<br/> XRG,SP3,DRAM1,ERN2,GABRG3,ZNF879,MBTPS2,FLNB,TRIM58<br/> ,TIAL1,TOM1,ELF2,PLPP4,NREP,ZDHC17,NSD2,FYCO1,SH3G<br/> LB1,CD9,CARD10,XKR5,RALGPS2,JCAD,TWIST2,OR4K2,CTIF,<br/> SAMHD1,IFT81,ENPP1,UTRN,RASGRP1,IGSF11,SNX9,TP53I11<br/> ,TMEM225,ANAPC1,NDRG2,CSNK2A1,BMP5,KCNC1,CSF1,GHRH,<br/> HDGFL3,BCL2L1,SERPINB9,SCAF4,MIR3142HG,CTDP1,HCN1,P<br/> RKG1,LAMA3,ASB4,GRIN2B,GRB14,INO80,FANCB,GPR156,IGH<br/> V2-<br/> 70D,CLNS1A,CNMD,DHRS3,SMAD5,CELF4,TCERG1,ABCG1,OR4C<br/> 46,FOXN3,KCNK5,DCUN1D4,VSTM4,SLC40A1,PRAME,MYCL,TNN<br/> ,CIDEA,PSAP,LPGAT1,MICALL2,MED1,CDC14B,PCNT,KDM6A,A<br/> TRN,IL33,AJAP1,GPRC5C,ROR2,CFH,PPP2R2A,ZNF521,KL,RA<br/> SGEF1C,BANK1,CSDE1,LMX1A,TMEM178A,IL10,ACTR2,OR1L6,<br/> SFPQ,SCML2,PRAMEF25,RIOK1,CLSTN2,PTH,SOSTDC1,PRKAA2<br/> ,CSF2RB,DIRAS2,SKA1,NDC80,SOHLH1,LARP6,PACRG,PHF20L<br/> 1,ABHD2,ITPRIP,VSTM2A,MAP6,VASP,PLA2G4A,ETV6,PALMD,<br/> RAB12,IQGAP1,RPS12,CAMLG,COX7A2L,ZBTB7C,TEAD1,MORC2<br/> ,SREBF2,ANP32B,YBX3,AIMP1,THNSL2,FYB2,NRXN1,PCID2,H<br/> IPK1,ZNF234,CISD1,ZNF518A,DGKK,FRY,SNAP91,CD70,CIBA<br/> R1,PBLD,FICD,CADM1,CENPE,PEG10,LMX1B,NET1,SIPA1L2,N<br/> GDN,ELOC,ANLN,TWIST1,AKT3,ALKAL2,JAK2,SLC1A7,VSX1,R<br/> PF2,FSTL1,ZBTB38,ISX,SVEP1,MADD,HCTR1,RBM19,PTGS1,<br/> PATL1,ZNF287,CELSR2,ZNF449,PRSS2,FH,CREBBP,MELTF,TN<br/> KS,GORAB,PCNA,SIAH3,TRPV5,UFL1,ADAMTS5,NFKBIA,PRKCB<br/> ,OR2T3,ABCC8,ANXA4,MT1HL1,CACNA1E,ZC3H15,ANP32A,RFC<br/> 2,ZNF354C,ALX4,RTRAF,USH1C,BRD4,ZBTB21,SERBP1,NEDD9<br/> ,OLFM4,NRBP1,ITGA6,ATP2B1,GAP43,IARS2,ASS1,MTCL1,GR<br/> IP1,IGHV10R15-<br/> 9,CTNBL1,AGAP9,ADGRE3,SAR1A,ADCY9,PPP1R17,CNIH1,MA<br/> ST2,HPSE2,BTG3,ZNF528,ERLIN2,ZNF611,UBAP2,XKR6,OTOP<br/> 1,CIDEA,ARFGEF3,ZBTB49,EXT2,EXOC1,HEPACAM,KRT6A,STO<br/> X2,AGO1,PDP2,MEOX2,SLC6A1,GID8,ELL2,STAT1,BRMS1L,ND<br/> FIP2,NR2C1,MAP2K6,CMTM7,DGKG,SLC6A11,KCNJ18,GATAD1,<br/> MTPN,ABI1,CEMIP,PRAMEF2,POU6F2,IMPACT,CCBE1,PARK7,A<br/> DAMTS18,MAPK8,ITGA4,OAZ2,PPME1,MED12L,ZSCAN30,FBXL1<br/> 7,UBL7,POU1F1,UBE2J2,ADCYAP1R1,PLA2G12B,MTF2,CSMD1,<br/> NCAPG2,TM9SF4,RAPGEF4,OR6C75,FOXP2,ASB2,MYOCD,CEP12<br/> 0,ATP13A3,ZSCAN5C,CYFIP2,HNRNPM,ACACA,ASCC2,EFHB,OR<br/> 13C9,ARID3B,MEF2C,ZNF613,ADGRB1,RXRA,WNT7A,RBPMS2,M<br/> AP3K5,NDFIP1,MAP3K4,TRIM43B,WASF3,S100B,SERPINI2,PR<br/> DM13,TRIM43,FOXO6,ERI1,ZNF112,ATP6V1C2,C16ORF72,MAG<br/> EL2,PKN2,RAD51AP1,OR10H2,PDE2A,RAB38,LRRC2,DBF4B,FB<br/> XW8,SDCBP,NECTIN1,DSG1,JPT2,SPPL2B,NSMCE1,ZNF813,WW<br/> OX,ZBTB25,PASK,MLLT1,NCK1,FLVCR1,SCAF8,FGR,CWC22,CD<br/> CA8,PPP2R3A,DNMBP,TRIM23,ATP6V1B2,CXCL2,TOPI,SNAP29<br/> ,MLLT10,C2,IFNAR1,RNF8,GNG12,EPHA4,CYTH4,INTS13,GAB<br/> RA5,MECOM,DNMT3L,NTRK2,IL1RAPL1,ACSM2A,NUMB,LHX9,AD<br/> AMTS9,WNT2B,COLEC12,FRRS1,ZBTB10,TNNI1,OCLN,POSTN,C </p> |
|--|--|--|----------------------------------------------------------------------------------------------------------------------------------------------------------------------------------------------------------------------------------------------------------------------------------------------------------------------------------------------------------------------------------------------------------------------------------------------------------------------------------------------------------------------------------------------------------------------------------------------------------------------------------------------------------------------------------------------------------------------------------------------------------------------------------------------------------------------------------------------------------------------------------------------------------------------------------------------------------------------------------------------------------------------------------------------------------------------------------------------------------------------------------------------------------------------------------------------------------------------------------------------------------------------------------------------------------------------------------------------------------------------------------------------------------------------------------------------------------------------------------------------------------------------------------------------------------------------------------------------------------------------------------------------------------------------------------------------------------------------------------------------------------------------------------------------------------------------------------------------------------------------------------------------------------------------------------------------------------------------------------------------------------------------------------------------------------------------------------------------------------------------------------------------------------------------------------------------------------------------------------------------------------------------------------------------------------------------------------------------------------------------------------------------------------------------------------------------------------------------------------------------------------------------------------------------------------------------------------------------------------------------------------------------------------------------------------------------------------------------------------------------------------------------------------------------------------------------------------------------------------------------------------------------------------------------------------------------------------------------------------------------------------------------------------------------------------------------------------------------------------------------------------------------------------------------------------------------------------------------------------------------------------------------------------------------------------------------------------------------------------------------------------------------------------------------------------------------------------------------------------------------------------------------------------------------------------------------------------------------------------------------------------------------------------------------------------------------------------------------------------------------------------------------------------|

|           |                    |                       |                                                                                                                                                                                                                                                                                                                                                                                                                                                                                                                                                                                                                                                                                                                                                                                                                                                                                                                                                                                                                                                                                                                                                                                                                                                                                                                                                                                                                                                                                                                                                                                                                                                                                                                                                                                                                                                                                                                                                                                                                                                                                                                                                                                                                                                                                                                                                                                                                                                                                                                                                  |
|-----------|--------------------|-----------------------|--------------------------------------------------------------------------------------------------------------------------------------------------------------------------------------------------------------------------------------------------------------------------------------------------------------------------------------------------------------------------------------------------------------------------------------------------------------------------------------------------------------------------------------------------------------------------------------------------------------------------------------------------------------------------------------------------------------------------------------------------------------------------------------------------------------------------------------------------------------------------------------------------------------------------------------------------------------------------------------------------------------------------------------------------------------------------------------------------------------------------------------------------------------------------------------------------------------------------------------------------------------------------------------------------------------------------------------------------------------------------------------------------------------------------------------------------------------------------------------------------------------------------------------------------------------------------------------------------------------------------------------------------------------------------------------------------------------------------------------------------------------------------------------------------------------------------------------------------------------------------------------------------------------------------------------------------------------------------------------------------------------------------------------------------------------------------------------------------------------------------------------------------------------------------------------------------------------------------------------------------------------------------------------------------------------------------------------------------------------------------------------------------------------------------------------------------------------------------------------------------------------------------------------------------|
|           |                    |                       | <p>REB5,MIR548H4,CD101,SHISA6,MEGF10,IL17RD,FBXO31,EXTL3,AKAP11,TRPM7,GRIK1,PRKAB1,DTHD1,IREB2,MVB12B,PTK2,MARK4,CDH5,CD5L,RCAN2,ANKRD6,SCGN,NFKBID,ARHGAP12,CLDN18,ASCL3,MPP7,DIAPH1,FEZ2,INIP,LAMB1,MIR17HG,APIP,CYFIP1,UBE3A,PCDH8,SEMA4D,JAM2,SERPINB10,PITPNC1,FRMD6,MC2R,ZBTB20,FAT4,IMPA2,ZNF66,AP2B1,RUNX1,AKR1B1,C9,KIRREL1,WNT5B,RASGEF1B,AMFR,SAXO1,SCARA5,NE NF,SH2D1B,POMT2,PTGFR,ZNF845,OR4L1,ASAP1,SAMD13,ICA1,PLCZ1,EDIL3,NOS1AP,MTTP,SLC9A5,FCRLA,DIDO1,TPTE,SORBS2,PDCL3,SRP9,CNKSR1,CCDC88A,GPR55,NSUN2,CHCHD2,HKDC1,ADAMTS16,ACOXL,CDC45,OR11G2,BICD1,TNFSF11,FYN,BUB1,KDM5A,PCBP3,MYL12B,ZNF705G,PPM1F,ADGRL2,ARL13B,SDE2,RBMS3,UHRF2,SCN8A,HDAC2,AVEN,SLF1,GON4L,TBX15,SH2D3C,PSME3IP1,DOCK3,TRNAU1AP,NCS1,COL18A1,LHFPL2,ALB,DOK5,ATP9B,NALCN,ZFYVE28,MAPK9,PABPC1,CRTAM,APELA,SLC39A8,ROR1,OPA3,FUT8,TET1,ARNT2,ASB3,HECW2,POTEJ,CDH2,ITGA8,FBXL20,NTN4,RAD9A,XRN2,PHLPP1,GPR137B,EPHB1,RP1L1,GRM5,ADCK1,RAI14,SPOPL,KCNJ6,B9D1,RRAS2,GNA14,ZNF678,BMPER,PRDM15,CUX1,DPP6,SRGAP3,ZNF420,MACROH2A1,MITF,EPHB2,TSPAN13,TOGARAM1,CSNK1G1,SACS,BCL2L13,CD38,EYA4,DPH6,MYO5B,RGPD4,CDK14,AKAIN1,MET,SPPL3,CDH17,ZNF705B,ATP6V0D2,PPFIA2,CDH13,MED13L,STXBP4,SERPINB2,CACNG3,ATG5,MAGI2,PRDM11,VMP1,UNK,FAM171A1,MLIP,FLRT2,MYB,KALRN,ZNF704,SLC1A2,GNAS,LAMA1,MFHAS1,SERPINB7,CPQ,ATRNL1,TIAM2,DHX29,BMP7,TT C28,ASTN2,DLG5,TNFAIP8,ZMYND8,GAPVD1,GABRA2,RNF217,KCTD1,OR2T2,ZNF74,BPTF,BTBD10,AK3,ZMYND11,TMEM25,NUDT21,GRM3,KMT2C,DDX6,ADGRF5,OR4N2,PDGFC,WDR41,PLIN2,PPP1R13B,FOCAD,ABL2,MMP26,TRAPPC6B,BACE2,RFX2,PARBP,NECAB1,PKNOX2,EYA1,FHOD3,PRPF18,SLIT2,TMPRSS3,EXO4,CNOT7,KCNIP4,ESCO1,KCTD8,PLCL1,ERBB4,IL20RB,SERPINB11,FAM3B,GSAP,TRHDE,SYNDIG1,ROBO1,SAMD4A,PBX1,IRAG1,NPAS3,NUF2,PRKCQ,RGPD2,ANTXR1,NDRG1,SORCS2,SIPAIL3,TRDN,MGMT,ZNF679,NLGN1,CTTNBP2,SHLD2,NOS1,SLC6A3,PRR16,ASIC2,EFNA5,TCF12,GAS2L1,ARHGEF11,RAB27A,NSD1,EHMT1,SLIT3,DTNA,KIF13A,FRMD5,ESR1,MYO9B,NTNG1,KDM4B,CYP2C8,KCNQ5,LOXL2,CACNA2D1,NYAP2,IQICJ-SCHIP1,ADGRG7,SKAP2,PRLR,AGO3,HTT,LARS2,FOXBI,RAD51B,CAMK1D,PIK3R3,HLA-F,FER,ZNF302,EYA2,CCR2,STARD13,INTS12,A2M,FGGY,CHFR,ZNF721,EPS8,OSBPL6,JAZF1,ZNF578,ZNF891,SPOCK3,SEMA4B,NRF1,IGHV10R21-1,ZNF14,HRH1,PHC2,GRIA4,AGAP1,ROCK2,PRDM1,RORA,STMP1,IL16,ATAT1,DMRT1,EIF4G3,CDCA5,PPP1CB,CATSPER2,RGS8,RAB31,PKD1,HSPG2,PSMD2,CSMD3,HERPUD1,NCOA6,TRIM2,HSD17B2,COL4A3,WASHC1,ZFP30,RGS7,HOOK3,KIF7,GNF2,PCSK2,FSTL4,CLDN10,BARD1,PNPLA3,STK3,DEPTOR,ZNF423,C1QL3,RSU1,PNPLA8,ZNF568,HNRNPU,CEP72,RAB3GAP2,CADPS,APCDD1,IGF1R,KCNAB1,PRKAG2,GLI2,THRB,AKAP13,MORC3,ATP10A,DNM1L</p> |
| GO:000902 | cell morphogenesis | 7.530316488123854e-27 | <p>NOTCH2,CNTN4,PTPRD,LRRRC4C,MYO9A,ULK2,DLC1,RIPOR2,RDX,STXBP1,BCL2,CDH8,CHRNA7,ROBO2,RIMS1,FGD4,USH2A,CD42EP3,RIMS2,AUTS2,CARMIL1,PARVB,CNTNAP2,ZMYM4,DSCAM,CRKL,TNIK,DOCK10,EGFR,MACF1,NEDD4,CRB1,BCL11A,CDH4,PHACTR1,NEO1,CNTN6,PAK1,EPHA7,RAPGEF2,LRP2,ADGRB3,TAOK3,ADAMTSL1,EPB41L3,TBCD,NEDD4L,APP,DCCLK1,STAU2,SEMA5A,SYT1,VCL,ARHGAP44,NTF3,AURKA,CFDP1,KANK1,MAP4K4,BMPRI1B,CTNNA2,PAK3,DIP2B,TRPC5,DNM3,PRKCZ,DIP2A,HECW1,COBL,YAP1,FRYL,ALCAM,NCAM1,FAT3,CHN1,PAFAH1B1,TPM1,CDH7,NFIB,PRTG,TIAM1,ENAH,SEMA3C,TMEM108,BR</p>                                                                                                                                                                                                                                                                                                                                                                                                                                                                                                                                                                                                                                                                                                                                                                                                                                                                                                                                                                                                                                                                                                                                                                                                                                                                                                                                                                                                                                                                                                                                                                                                                                                                                                                                                                                                                                                                                                                                                                                                          |

|            |                            |                        |                                                                                                                                                                                                                                                                                                                                                                                                                                                                                                                                                                                                                                                                                                                                                                                                                                                                                                                                                                                                                                                                                                                                                                                                                                                              |
|------------|----------------------------|------------------------|--------------------------------------------------------------------------------------------------------------------------------------------------------------------------------------------------------------------------------------------------------------------------------------------------------------------------------------------------------------------------------------------------------------------------------------------------------------------------------------------------------------------------------------------------------------------------------------------------------------------------------------------------------------------------------------------------------------------------------------------------------------------------------------------------------------------------------------------------------------------------------------------------------------------------------------------------------------------------------------------------------------------------------------------------------------------------------------------------------------------------------------------------------------------------------------------------------------------------------------------------------------|
|            |                            |                        | <p>WD1,SEMA6D,CDH11,PARD3,TNR,COL22A1,ELAVL4,ABL1,SDC2,GAS2,CDH18,MYO10,CDHR3,PEAK1,LATS2,NRG1,AP3B1,USP33,CD44,PTPRO,TRIO,EXT1,LIMD1,CTNND2,ATP8A2,PLXNA2,ARHGEF7,SEMA3E,MARK2,EPHA6,SH3KBP1,ATL1,KNDC1,AFG3L2,ANK3,BCL11B,DOCK5,ECE1,MBP,CDH20,PACSIN2,CNTN1,PDLIM5,DISC1,WDPCP,NRK,SEMA3A,UNC5D,SEMA3D,RELN,UST,SLC23A2,DOCK1,B4GALT6,PLS1,SRGAP2,NIN,DRAXIN,GLI3,RERE,MAP2,LAMC1,FARP1,LAMC3,DCC,DAB1,PRKN,PCDH15,NGEF,CDH23,ALS2,ITSN2,ARHGEF28,ROCK1,NTN1,DPYSL5,SHROOM3,TANC2,FLNB,ZDHHC17,LAMA3,TNN,MICALL2,MED1,ATRN,FAT1,LMX1A,ACTR2,MAP6,VASP,PALMD,IQGAP1,NRXN1,FRY,CELSR2,MELTF,NEDD9,OLFM4,GAP43,GRIP1,ABI1,IMPACT,ITGA4,CYFIP2,MEF2C,ADGRB1,WNT7A,WASF3,S100B,FBXW8,NECTIN1,FGR,DNMBP,EPHA4,NTRK2,IL1RAPL1,NUMB,LHX9,FBXO31,PTK2,CDH5,DIAPH1,FEZ2,LAMB1,CYFIP1,UBE3A,SEMA4D,FRMD6,SPAG6,FYN,MYL12B,ARL13B,COL18A1,CDH9,HECW2,CDH2,CNTN5,ITGA8,NTN4,EPHB1,RPS6KA5,NRP1,ITGA1,CHODL,NRXN3,CDH12,FBLN1,CUX1,EPHB2,MET,PPFIA2,UNK,FAM171A1,FLRT2,KALRN,LAMA1,ATRN1,TIAM2,BMP7,KIRREL3,SLIT2,CCDC141,ROBO1,PRKCQ,ANTXR1,SIPA1L3,NLGN1,EFNA5,SLIT3,NTNG1,NYAP2,FOXB1,FER,EP8,SEMA4B,DMRT1,PTPRQ,FSTL4,IGF1R,GLI2,ATP10A</p>                                                                                                                         |
| GO:0034330 | cell junction organization | 1.7487318187293132e-25 | <p>PTPRD,LRR4C,MYO9A,UNC13C,TLN2,DLC1,PTPRA,RDX,ERC1,IL1RAPL2,BCL2,LRFN2,GPHN,CDH8,CHRNA7,ROBO2,GABRB3,CACNG2,NEGR1,GPC6,CNTNAP2,APC,DSCAM,CRKL,PTPRJ,DOCK10,MACF1,NEDD4,NTRK3,CAST,SLC8A3,EPHA7,RAPGEF2,ADGRB3,PATJ,EPB41L3,TBCD,ADAM10,APBB2,APP,CACNB2,STAU2,GABRG2,MAPRE2,VCL,ARHGAP44,SRGAP2C,MAP4K4,CTNNA2,RAB8B,PAK3,ERC2,DNM3,DIP2A,DUSP22,NFIA,CORO2B,LIMCH1,FMN1,PAFAH1B1,NF2,CNKS2,CTNNA1,CDH7,PTPRK,PDZRN3,TMEM108,ANK2,TANC1,BCAS3,CDH11,PARD3,TNR,DST,CXADR,XIRP2,ABL1,SLC1A1,LRFN5,CDH18,RAP1A,GRID2,CDHR3,PEAK1,NRG1,MUSK,DGKB,PTPRO,EXT1,CTNND2,ARHGEF7,SEMA3E,ABHD17C,LINGO2,AFG3L2,ANK3,CDH20,TJP1,NPHP4,IQSEC1,PDLIM5,DISC1,DNER,WDPCP,STRN,RELN,UNC13B,SRGAP2,LAMC1,FARP1,MTMR2,LGI2,NGEF,PRKCH,PKP1,FRMPD4,ALS2,SHANK2,MESD,SYBU,ROCK1,NTN1,INSR,COLQ,SNAI2,TANC2,CD9,GRIN2B,MICALL2,LMX1A,IL10,ACTR2,CLSTN2,NRXN1,HIPK1,SVBP1,ABCC8,NEDD9,ITGA6,GAP43,SLC6A1,MEF2C,ADGRB1,WNT7A,WASF3,PKN2,SDCBP,NECTIN1,DSG1,EPHA4,NTRK2,IL1RAPL1,NUMB,OCN,SHISA6,PTK2,CDH5,CLDN18,MPP7,CYFIP1,UBE3A,PCDH8,SEMA4D,KIRREL1,NOS1AP,FYN,PPM1F,ADGRL2,CDH9,CDH2,CNTN5,EPHB1,GRM5,NRP1,SDK1,PRKCA,BCR,NRXN3,CDH12,EPHB2,PPFIA2,VMP1,FLRT2,KALRN,IGSF21,DLG5,GABRA2,KIRREL3,ERBB4,SYNDIG1,NLGN1,CTTNBP2,ASIC2,EFNA5,NTNG1,FER,ROCK2,CLDN10,C1QL3,IGF1R</p> |
| GO:0032990 | cell part morphogenesis    | 2.3807342672176264e-23 | <p>NOTCH2,CNTN4,PTPRD,LRR4C,MYO9A,ULK2,NUBPL,STXBP1,BCL2,CHRNA7,ROBO2,RIMS1,RIMS2,AUTS2,CNTNAP2,DSCAM,TNFRK,DOCK10,MACF1,NEDD4,BCL11A,CDH4,PHACTR1,NEO1,CNTN6,PAK1,EPHA7,RAPGEF2,LRP2,ADGRB3,TAOK3,ADAMTSL1,EPB41L3,NEDD4L,APP,DCLK1,STAU2,SEMA5A,SYT1,VCL,ARHGAP44,NTF3,AURKA,KANK1,MAP4K4,BMPR1B,CTNNA2,PAK3,DIP2B,TRPC5,DNM3,PRKCZ,DIP2A,HECW1,COBL,ALCAM,NCAM1,CHN1,PAFAH1B1,NFIB,PRTG,TIAM1,ENAH,SEMA3C,TMEM108,SEMA6D,CDH11,PARD3,TNR,ELAVL4,ABL1,SDC2,USP33,CD44,PTPRO,TRIO,EXT1,CTNND2,ATP8A2,PLXNA2,ARHGEF7,SEMA3E,MARK2,EPHA6,ATL1,KNDC1,AFG3L2,ANK3,BCL11B,ECE1,MBP,PACSIN2,CNTN1,PDLIM5,DISC1,NRK,SEMA3A,UNC5D,SEMA3D,RELN,UST,SLC23A2,B4GALT6,SRGAP2,NIN,DRAXIN,GLI3,RERE,MAP2,FARP1,DCC,DAB1,PRKN,NGEF,ALS2,ITSN2,ROCK1,NTN1,DPYSL5,TANC2,ZDHHC17,BCL2L1,LAMA3,TNN,LMX1A,ACTR2,MAP6,VASP,IQGAP1,NRXN1,CELSR2,GAP43,GRIP1,ABI1,IMPACT,ITGA4,CYFIP2,ADGRB1,WNT7A,S100B,FBXW8,NECTIN1,EPHA4,NTRK2,IL1RAPL1,NUMB,LHX9,FBXO31,PTK2,FEZ2,CYFIP1,UBE3A,SEMA4D,SPAG6,FYN,HECW2,CDH2,CNTN5,EPHB1,RPS6KA5,PID1,NRP1,ITGA1,CHODL,NRXN3,CUX1,EPHB2,PPFIA2,FLR</p>                                                                                                                                                                                          |



|            |                                                       |                        |                                                                                                                                                                                                                                                                                                                                                                                                                                                                                                                                                                                                                                                                                                                                                                                                                                                                                                                                                                                                                                                                                                                                                                    |
|------------|-------------------------------------------------------|------------------------|--------------------------------------------------------------------------------------------------------------------------------------------------------------------------------------------------------------------------------------------------------------------------------------------------------------------------------------------------------------------------------------------------------------------------------------------------------------------------------------------------------------------------------------------------------------------------------------------------------------------------------------------------------------------------------------------------------------------------------------------------------------------------------------------------------------------------------------------------------------------------------------------------------------------------------------------------------------------------------------------------------------------------------------------------------------------------------------------------------------------------------------------------------------------|
|            |                                                       |                        | T2,KALRN,LAMA1,TIAM2,BMP7,KIRREL3,SLIT2,CCDC141,ROBO1,PRKCQ,NLGN1,EFNA5,SLIT3,NTNG1,NYAP2,FOXB1,SEMA4B,FSTL4,IGF1R,GLI2,DNM1L                                                                                                                                                                                                                                                                                                                                                                                                                                                                                                                                                                                                                                                                                                                                                                                                                                                                                                                                                                                                                                      |
| GO:0048858 | cell projection morphogenesis                         | 3.224019629916792e-23  | NOTCH2,CNTN4,PTPRD,LRR4C,MYO9A,ULK2,STXBP1,BCL2,CHRNA7,ROBO2,RIMS1,RIMS2,AUTS2,CNTNAP2,DSCAM,TN1K,DOC K10,MACF1,NEDD4,BCL11A,CDH4,PHACTR1,NEO1,CNTN6,PAK1,EPHA7,RAPGEF2,LRP2,ADGRB3,TAOK3,ADAMTSL1,EPB41L3,N EDD4L,APP,DCLK1,STAU2,SEMA5A,SYT1,VCL,ARHGAP44,NTF3,AURKA,KANK1,MAP4K4,BMPR1B,CTNNA2,PAK3,DIP2B,TRPC5,DNM3,PRKCZ,DIP2A,HECW1,COBL,ALCAM,NCAM1,CHN1,PAFAH1B1,NFIB,PRTG,TIAM1,ENAH,SEMA3C,TMEM108,SEMA6D,CDH11,PARD3,TNR,ELAVL4,ABL1,SDC2,USP33,CD44,PTPRO,TRIO,EXT1,CTNND2,ATP8A2,PLXNA2,ARHGEF7,SEMA3E,MARK2,EPHA6,ATL1,KNDC1,AFG3L2,ANK3,BCL11B,ECE1,MBP,PACSIN2,CNTN1,PDLIM5,DISC1,NRK,SEMA3A,UNC5D,SEMA3D,RELN,UST,SLC23A2,B4GALT6,SRGAP2,NIN,DRAXIN,GLI3,RERE,MAP2,FARP1,DCC,DAB1,PRKN,NGEF,ALS2,ITSN2,ROCK1,NTN1,DPYSL5,TANC2,ZDHHC17,LAMA3,TNN,LMX1A,ACTR2,MAP6,VASP,IQGAP1,NRXN1,CELSR2,GAP43,GRIP1,ABI1,IMPACT,ITGA4,CYFIP2,ADGRB1,WNT7A,S100B,FBXW8,NECTIN1,EPHA4,NTRK2,IL1RAPL1,NUMB,LHX9,FBXO31,PTK2,FEZ2,CYFIP1,UBE3A,SEMA4D,SPAG6,FYN,HECW2,CDH2,CNTN5,EPHB1,RPS6KA5,NRP1,ITGA1,CHODL,NRXN3,CUX1,EPHB2,PPFIA2,FLRT2,KALRN,LAMA1,TIAM2,BMP7,KIRREL3,SLIT2,CCDC141,ROBO1,PRKCQ,NLGN1,EFNA5,SLIT3,NTNG1,NYAP2,FOXB1,SEMA4B,FSTL4,IGF1R,GLI2 |
| GO:0120039 | plasma membrane bounded cell projection morphogenesis | 3.2979439515516833e-23 | NOTCH2,CNTN4,PTPRD,LRR4C,MYO9A,ULK2,STXBP1,BCL2,CHRNA7,ROBO2,RIMS1,RIMS2,AUTS2,CNTNAP2,DSCAM,TN1K,DOC K10,MACF1,NEDD4,BCL11A,CDH4,PHACTR1,NEO1,CNTN6,PAK1,EPHA7,RAPGEF2,LRP2,ADGRB3,TAOK3,ADAMTSL1,EPB41L3,N EDD4L,APP,DCLK1,STAU2,SEMA5A,SYT1,VCL,ARHGAP44,NTF3,AURKA,KANK1,MAP4K4,BMPR1B,CTNNA2,PAK3,DIP2B,TRPC5,DNM3,PRKCZ,DIP2A,HECW1,COBL,ALCAM,NCAM1,CHN1,PAFAH1B1,NFIB,PRTG,TIAM1,ENAH,SEMA3C,TMEM108,SEMA6D,CDH11,PARD3,TNR,ELAVL4,ABL1,SDC2,USP33,CD44,PTPRO,TRIO,EXT1,CTNND2,ATP8A2,PLXNA2,ARHGEF7,SEMA3E,MARK2,EPHA6,ATL1,KNDC1,AFG3L2,ANK3,BCL11B,ECE1,MBP,CNTN1,PDLIM5,DISC1,NRK,SEMA3A,UNC5D,SEMA3D,RELN,UST,SLC23A2,B4GALT6,SRGAP2,NIN,DRAXIN,GLI3,RERE,MAP2,FARP1,DCC,DAB1,PRKN,NGEF,ALS2,ITSN2,ROCK1,NTN1,DPYSL5,TANC2,ZDHHC17,LAMA3,TNN,LMX1A,ACTR2,MAP6,VASP,IQGAP1,NRXN1,CELSR2,GAP43,GRIP1,ABI1,IMPACT,ITGA4,CYFIP2,ADGRB1,WNT7A,S100B,FBXW8,NECTIN1,EPHA4,NTRK2,IL1RAPL1,NUMB,LHX9,FBXO31,PTK2,FEZ2,CYFIP1,UBE3A,SEMA4D,SPAG6,FYN,HECW2,CDH2,CNTN5,EPHB1,RPS6KA5,NRP1,ITGA1,CHODL,NRXN3,CUX1,EPHB2,PPFIA2,FLRT2,KALRN,LAMA1,TIAM2,BMP7,KIRREL3,SLIT2,CCDC141,ROBO1,PRKCQ,NLGN1,EFNA5,SLIT3,NTNG1,NYAP2,FOXB1,SEMA4B,FSTL4,IGF1R,GLI2         |
| GO:0048812 | neuron projection morphogenesis                       | 3.4998531859256274e-23 | NOTCH2,CNTN4,PTPRD,LRR4C,MYO9A,ULK2,STXBP1,BCL2,CHRNA7,ROBO2,RIMS1,RIMS2,AUTS2,CNTNAP2,DSCAM,TN1K,DOC K10,MACF1,NEDD4,BCL11A,CDH4,PHACTR1,NEO1,CNTN6,PAK1,EPHA7,RAPGEF2,LRP2,ADGRB3,TAOK3,ADAMTSL1,EPB41L3,N EDD4L,APP,DCLK1,STAU2,SEMA5A,SYT1,VCL,ARHGAP44,NTF3,AURKA,MAP4K4,BMPR1B,CTNNA2,PAK3,DIP2B,TRPC5,PRKCZ,DIP2A,HECW1,COBL,ALCAM,NCAM1,CHN1,PAFAH1B1,NFIB,PRTG,TIAM1,ENAH,SEMA3C,TMEM108,SEMA6D,CDH11,PARD3,TNR,ELAVL4,ABL1,SDC2,USP33,PTPRO,TRIO,EXT1,CTNND2,ATP8A2,PLXNA2,SEMA3E,MARK2,EPHA6,ATL1,KNDC1,AFG3L2,ANK3,BCL11B,ECE1,MBP,CNTN1,PDLIM5,DISC1,NRK,SEMA3A,UNC5D,SEMA3D,RELN,UST,SLC23A2,B4GALT6,SRGAP2,NIN,DRAXIN,GLI3,RERE,MAP2,FARP1,DCC,DAB1,PRKN,NGEF,ALS2,ITSN2,ROCK1,NTN1,DPYSL5,TANC2,ZDHHC17,LAMA3,TNN,LMX1A,ACTR2,MAP6,VASP,IQGAP1,NRXN1,CELSR2,GAP43,GRIP1,ABI1,IMPACT,ITGA4,CYFIP2,ADGRB1,WNT7A,S100B,FBXW8,NECTIN1,EPHA4,NTRK2,IL1RAPL1,NUMB,LHX9,FBXO31,PTK2,FEZ2,CYFIP1,UBE3A,SEMA4D,SPAG6,FYN,HECW2,CDH2,CNTN5,EPHB1,RPS6KA5,NRP1,ITGA1,CHODL,NRXN3,CUX1,EPHB2,PPFIA2,FLRT2,KALRN,LAMA1,TIAM2,BMP7,KIRREL3,SLIT2,CCDC141,ROBO1,PRKCQ,NLGN1,EFNA5,SLIT3,NTNG1,NYAP2,FOXB1,SEMA4B,FSTL4,IGF1R,GLI2                                 |

|            |                                                |                        |                                                                                                                                                                                                                                                                                                                                                                                                                                                                                                                                                                                                                                                                                                                                                                                                                                                                                                                                                                                                                                                                                                                                                                                                                                                                                                                                                                                                                                                                                                     |
|------------|------------------------------------------------|------------------------|-----------------------------------------------------------------------------------------------------------------------------------------------------------------------------------------------------------------------------------------------------------------------------------------------------------------------------------------------------------------------------------------------------------------------------------------------------------------------------------------------------------------------------------------------------------------------------------------------------------------------------------------------------------------------------------------------------------------------------------------------------------------------------------------------------------------------------------------------------------------------------------------------------------------------------------------------------------------------------------------------------------------------------------------------------------------------------------------------------------------------------------------------------------------------------------------------------------------------------------------------------------------------------------------------------------------------------------------------------------------------------------------------------------------------------------------------------------------------------------------------------|
|            |                                                |                        | A2, FLRT2, KALRN, LAMA1, TIAM2, BMP7, KIRREL3, SLIT2, CCDC141, ROBO1, PRKCQ, NLGN1, EFNA5, SLIT3, NTNG1, NYAP2, FOXB1, SEMA4B, FSTL4, IGF1R, GLI2                                                                                                                                                                                                                                                                                                                                                                                                                                                                                                                                                                                                                                                                                                                                                                                                                                                                                                                                                                                                                                                                                                                                                                                                                                                                                                                                                   |
| GO:0032989 | cellular component morphogenesis               | 1.6363577964102115e-22 | NOTCH2, CNTN4, PTPRD, NEBL, LRRC4C, MYO9A, ULK2, TENM4, NUBPL, STXBP1, BCL2, CHRNA7, ROBO2, RIMS1, RIMS2, AUTS2, CNTNAP2, DSCAM, TNK1, DOCK10, MACF1, NEDD4, BCL11A, CDH4, PHACTR1, NEO1, CNTN6, PAK1, EPHA7, RAPGEF2, LRP2, ADGRB3, TAOK3, ADAMTSL1, EPB41L3, NEDD4L, APP, DCLK1, STAU2, SEMA5A, SYT1, VCL, ARHGAP44, NTF3, AURKA, FIG4, KANK1, MAP4K4, BMPR1B, CTNNA2, PAK3, DIP2B, TRPC5, DNM3, PRKCZ, DIP2A, HECW1, COBL, ALCAM, NCAM1, CHN1, MYLK3, PAFAH1B1, TPM1, NFIB, PRTG, TIAM1, ENAH, SEMA3C, TMEM108, ANK2, SEMA6D, CDH11, LDB3, PARD3, TNR, ELAVL4, ABL1, SDC2, PGM5, USP33, CD44, PTPRO, TRIO, EXT1, CTNND2, ATP8A2, PLXNA2, ARHGEF7, SEMA3E, MARK2, TMOD2, EPHA6, ATL1, KNDC1, AFG3L2, ANK3, MYOM2, BCL11B, ECE1, MBP, PACSIN2, CNTN1, PDLIM5, DISC1, NRK, SEMA3A, UNC5D, SEMA3D, RELN, UST, SLC23A2, B4GALT6, SRGAP2, NIN, DRAXIN, GLI3, RERE, MAP2, FARP1, DCC, DAB1, PRKN, MTMR2, NGEF, ALS2, ITSN2, SOX30, ROCK1, NTN1, DPYSL5, TANC2, ZDHHC17, CD9, BCL2L1, LAMA3, TNN, LMX1A, ACTR2, MAP6, VASP, IQGAP1, NRXN1, CELSR2, GAP43, GRIP1, ABI1, IMPACT, ITGA4, CYFIP2, ADGRB1, WNT7A, S100B, FBXW8, NECTIN1, EPHA4, NTRK2, IL1RAPL1, NUMB, LHX9, FBXO31, PTK2, FEZ2, CYFIP1, UBE3A, SEMA4D, SPAG6, FYN, HECW2, CDH2, CNTN5, EPHB1, RPS6KA5, PID1, NRP1, ITGA1, CHODL, NRXN3, CUX1, EPHB2, PPFIA2, NRAP, FLRT2, KALRN, LAMA1, TIAM2, BMP7, KIRREL3, RFX2, FHOD3, SLIT2, CCDC141, ROBO1, PRKCQ, NLGN1, EFNA5, SLIT3, NTNG1, NYAP2, FOXB1, SEMA4B, FSTL4, IGF1R, GLI2, AKAP13, DNM1L |
| GO:0000904 | cell morphogenesis involved in differentiation | 4.298754718018709e-22  | NOTCH2, CNTN4, PTPRD, LRRC4C, ULK2, RIPOR2, STXBP1, BCL2, CHRNA7, ROBO2, USH2A, AUTS2, CARMIL1, PARVB, DSCAM, CRKL, TNK1, DOCK10, MACF1, NEDD4, BCL11A, CDH4, PHACTR1, NEO1, CNTN6, PAK1, EPHA7, RAPGEF2, ADGRB3, ADAMTSL1, TBCD, NEDD4L, APP, DCLK1, STAU2, SEMA5A, VCL, ARHGAP44, KANK1, BMPR1B, CTNNA2, PAK3, DIP2B, TRPC5, DNM3, DIP2A, HECW1, COBL, ALCAM, NCAM1, FAT3, CHN1, PAFAH1B1, NFIB, PRTG, TIAM1, ENAH, SEMA3C, SEMA6D, CDH11, PARD3, TNR, COL22A1, ELAVL4, ABL1, SDC2, PEAK1, LATS2, USP33, PTPRO, TRIO, EXT1, CTNND2, ATP8A2, PLXNA2, ARHGEF7, SEMA3E, MARK2, EPHA6, ATL1, KNDC1, AFG3L2, ANK3, BCL11B, DOCK5, ECE1, MBP, CNTN1, PDLIM5, DISC1, WDCP, SEMA3A, UNC5D, SEMA3D, RELN, UST, DOCK1, B4GALT6, PLS1, SRGAP2, NIN, DRAXIN, GLI3, RERE, MAP2, LAMC1, FARP1, LAMC3, DCC, DAB1, PCDH15, NGEF, CDH23, ALS2, ROCK1, NTN1, DPYSL5, TANC2, FLNB, ZDHHC17, LAMA3, TNN, MICALL2, ATRN, FAT1, LMX1A, ACTR2, MAP6, VASP, NRXN1, CELSR2, MELTF, NEDD9, OLFM4, GAP43, ABI1, ITGA4, MEF2C, ADGRB1, WNT7A, S100B, FBXW8, NECTIN1, EPHA4, NTRK2, IL1RAPL1, NUMB, LHX9, FBXO31, PTK2, FEZ2, LAMB1, CYFIP1, UBE3A, SEMA4D, FRMD6, FYN, ARL13B, COL18A1, HECW2, CDH2, CNTN5, ITGA8, NTN4, EPHB1, RPS6KA5, NRP1, CHODL, NRXN3, FBLN1, CUX1, EPHB2, MET, PPFIA2, UNK, FLRT2, KALRN, LAMA1, ATRN1, TIAM2, BMP7, SLIT2, CCDC141, ROBO1, PRKCQ, ANTXR1, SIPA1L3, NLGN1, EFNA5, SLIT3, NTNG1, FOXB1, FER, SEMA4B, PTPRQ, FSTL4, IGF1R, GLI2                                                          |
| GO:0050789 | regulation of biological process               | 5.049953940328589e-22  | NOTCH2, BCAR3, BRINP3, MTOR, CNTN4, CACNA2D3, SPOCK1, NSG1, SGCD, WWC1, ABCA13, GARNL3, LRP12, PTPRD, SLC24A2, TRAPPC9, BNC2, PVT1, LRRC4C, KCNH5, ANKS1B, SMOC1, MYO9A, ULK2, NLK, LONP2, UNC13C, FTO, KSR1, MGA, RFX7, ZNF236, PLCB1, ZNF536, MX2, TMPRSS2, TAF45, SVIL, CLTCL1, ZFPM2, TENM4, L3MBTL4, DLC1, TNRC6B, DPP10, ZDHHC21, PTPRA, ITPR2, RIPOR2, PDE4D, RDX, RP1, STXBP1, ERC1, RALA, IL1RAPL2, BCL2, ODAD2, KCNMA1, PRDM16, ALDH1A2, ARHGAP26, FBN1, LRFN2, CDH8, CHRNA7, DCDC1, GPR158, ROBO2, RIMS1, PIK3C3, EPC2, SPIRE1, TENM3, GABRB3, ZEB1, AKR1C3, SDCCAG8, RARB, FGD4, SPRED1, ENPEP, MYO1E, PLPPR1, USH2A, MINAR1, CDC42EP3, RIMS2, ALK, AUTS2, ADGRE1, FOXJ2, CDYL2, CARMIL1, MCTP1, PJA2, BABAM2, PAPPA2, GLIS3, FANK1, ERBIN, RHPN2, RIN2, PARVB, ANO6, CACNG2, DLGAP1, NEGR1, ZNF880, MLLT3, EGLN3, GPC6, SUS4, CNTNAP2, MAP4, MA                                                                                                                                                                                                                                                                                                                                                                                                                                                                                                                                                                                                                                        |

|  |  |  |                                                                                                                                                                                                                                                                                                                                                                                                                                                                                                                                                                                                                                                                                                                                                                                                                                                                                                                                                                                                                                                                                                                                                                                                                                                                                                                                                                                                                                                                                                                                                                                                                                                                                                                                                                                                                                                                                                                                                                                                                                                                                                                                                                                                                                                                                                                                                                                                                                                                                                                                                                                                                                                                                                                                                                                                                                                                                                                                                                                                                                                                                                                                                                                                                                                                                                                                                                                                                                                                                                                                                                                                                                                                                                                                                                                                                                                                                                                     |
|--|--|--|---------------------------------------------------------------------------------------------------------------------------------------------------------------------------------------------------------------------------------------------------------------------------------------------------------------------------------------------------------------------------------------------------------------------------------------------------------------------------------------------------------------------------------------------------------------------------------------------------------------------------------------------------------------------------------------------------------------------------------------------------------------------------------------------------------------------------------------------------------------------------------------------------------------------------------------------------------------------------------------------------------------------------------------------------------------------------------------------------------------------------------------------------------------------------------------------------------------------------------------------------------------------------------------------------------------------------------------------------------------------------------------------------------------------------------------------------------------------------------------------------------------------------------------------------------------------------------------------------------------------------------------------------------------------------------------------------------------------------------------------------------------------------------------------------------------------------------------------------------------------------------------------------------------------------------------------------------------------------------------------------------------------------------------------------------------------------------------------------------------------------------------------------------------------------------------------------------------------------------------------------------------------------------------------------------------------------------------------------------------------------------------------------------------------------------------------------------------------------------------------------------------------------------------------------------------------------------------------------------------------------------------------------------------------------------------------------------------------------------------------------------------------------------------------------------------------------------------------------------------------------------------------------------------------------------------------------------------------------------------------------------------------------------------------------------------------------------------------------------------------------------------------------------------------------------------------------------------------------------------------------------------------------------------------------------------------------------------------------------------------------------------------------------------------------------------------------------------------------------------------------------------------------------------------------------------------------------------------------------------------------------------------------------------------------------------------------------------------------------------------------------------------------------------------------------------------------------------------------------------------------------------------------------------------|
|  |  |  | <p> P3K9,SPON1,APC,ZMYM4,ZNF595,HHLA2,TSHZ3,RBFOX3,PLPP<br/> R5,DSCAM,RTN1,TCF4,CRKL,ILDR2,SOX5,SETD2,ERG,ARHGAP<br/> 24,ZNF573,TNIK,SLC4A10,PTPRJ,KDM4C,NEK4,DOCK10,TSHZ<br/> 2,EGFR,ZNF280B,RF3, DENND1A, USP14, ANGPT1, CDK12, BACH<br/> 1,MACF1,CTNNA3,PRKACB,NEK7,RGS3,NCOR1,RNF220,DOCK2,<br/> ZNF407,NEDD4,MAML2,MTRF1,SND1,SCAI,NSMCE2,BTBD9,BCL<br/> 11A,SOX6,FAM83F,TMEM182,SGMS1,GRIK3,CHSY1,FLI1,RPRD<br/> 1A,CDH4,ATP2B2,NTRK3,RXFP1,C5,PDE1C,ZFAND6,PHACTR1,<br/> DKK2,FLT1,DNAJC13,ZNF648,RFC3,RABEP1,ZNF382,TASP1,T<br/> HRAP3,MAPKBP1,AOAH,GABRB1,PSMA8,DGKI,INVS,C12ORF4,E<br/> DAR,GRIA1,CRACD,CAST,TTC39B,NUP214,NEO1,CNTN6,SLC39<br/> A12,CABLES1,SLC8A3,MALRD1,TOM1L2,PRKD1,TPTE2,PAK1,G<br/> MDS,EPHA7,CTNNAL1,NCOA7,KHDRBS2,CHRM3,RALGPS1,SPEN,<br/> RAPGEF2,PELI2,LRP2,ADGRB3,RUNX2,ARSB,FGF12,GABRA6,T<br/> AOK3,ONECUT1,LDLRAD3,CPEB4,TMEM38B,PRICKLE2,SLC24A3<br/> ,UBE2L3,LDB2,TAF4A,BTBD11,PUM3,CCL28,SMYD3,PATJ,GRM<br/> 7,SEPTIN9,RETREG1,RPTOR,TMEM117,GHR,EPB41L3,THADA,C<br/> OL4A2,SSBP3,RALGAP1,CELF2,RAPGEF5,TBCL,NEDD4L,PPP<br/> R12B,TRPM1,ADAM10,HDAC9,ZHX3,ATF7IP,IL1R1,APBB2,APP<br/> ,RPS6KA2,SAMSN1,CACNA1C,KDM1B,CACNB2,KLHL13,MTUS1,D<br/> CLK1,STAU2,GABRG2,DOCK8,TMC1,MAPRE2,ZNF600,USP18,SE<br/> MA5A,SYT1,VCL,ARHGAP44,NTF3,ACER2,PARP15,NDUF4F2,CD<br/> 2AP,ZNF723,AURKA,PARN,CFDP1,ST18,PYGO1,SLC8A1,HERPU<br/> D2,SSBP2,PTPRR,SRGAP2C,ANKRD31,FIG4,DUX4,TAF4A,ABCG<br/> 8,SERPINA6,PLGRKT,SRGAP2B,KANK1,KCNE4,MAP4K4,HIVEP2<br/> ,ABCD2,BMPR1B,FMN2,PCSK6,AKAP6,HOMER2,ZNF717,CTNNA2<br/> ,ARNT,RAB8B,PAK3,RFTN1,PDE1A,ZNF257,DIP2B,KCNK10,RA<br/> NBP2,LARP1,ITPKB,TRPC5,RGS20,PDE10A,UBE2E2,RAP1GDS1<br/> ,HHAT,RNLS,CLIC6,KICS2,ERC2,DNM3,NBN,SCP2,SYN3,IFT5<br/> 7,INTS7,PRKCZ,SPOP,BTLA,GRB10,RYR3,TAF15,DIP2A,MSH6<br/> ,MCPH1,ARHGAP32,RAB27B,CNST,RGS9,HECW1,DEFA3,MBNL2,<br/> ABCA5,PHF19,MRTFA,TAF4B,COBL,SENP6,DUSP22,EBF2,YAP1<br/> ,NF1A,WDR70,PPM1L,RIPK4,ZKSCAN5,SHC4,BRINP1,MAPK1,M<br/> GAT5,CADPS2,KCNJ1,HRH2,RABGAP1L,ITIH5,ADAM22,USP25,<br/> KMT2E,ALCAM,PLG,PCGF5,PDGFD,SYT10,ZNRF3,PPP1R1C,ITG<br/> BL1,ARHGEF17,NRG3,UBE20,SFMBT2,MIR63AHG,ANKFY1,NCA<br/> M1,GFRA1,SYCP1,NIPBL,SLC16A1,SPIDR,EWSR1,GABPA,FAT3<br/> ,MICU1,ZNF735,CORO2B,CARD18,CHD6,STK38,PTPN13,CHN1,<br/> HRH4,SORCS3,MYLK3,KANSL1,GLP2R,LIMCH1,FMN1,MBNL1,PA<br/> FAH1B1,ATF6,EFEMP1,ZNF684,TM7SF3,DCAF1,ITGB8,STON2,<br/> VPS13D,CCNG2,TLK1,TPM1,NF2,LRR38,CNKR2,GRIK4,RBFO<br/> X1,HIVEP1,CORIN,CTNNA1,PPP1R9A,MOB3B,BIRC6,AKAP9,KL<br/> F15,RASGRF2,PPARA,MEIS2,SNX30,NFIB,KCNS3,ERMP1,MRTF<br/> B,PPP6R3,PRTG,RGL1,SYNJ1,NR5A2,ADAMTS3,TIAMI,ARAP2,<br/> GRM1,FOXJ3,PTPRK,ARHGEF12,GABRG1,PAK5,TRERF1,PCDH11<br/> Y,PPP2R5E,PLA2R1,EIF3D,SEMA3C,DAPK1,NAV3,SLC24A4,SE<br/> C14L1,VPS13C,TMEM108,AGO2,STK32B,PHC3,MAGI1,ALPK2,D<br/> NAH11,JARID2,SCN2A,RIC8B,SORCS1,DNAJC15,GATAD2B,CPE<br/> ,EVC2,DYSF,IL34,ANK2,BRWD1,TANC1,ADGRV1,ZNF846,MELK<br/> ,BCAS3,RYR2,SYNE2,BBS2,WNT9B,ZNF606,CLPX,RANBP3L,OR<br/> 4F6,NKAIN3,NKG7,SEMA6D,DUSP16,SMARCA4,CDH11,USP8,FA<br/> BP7,PARD3,MAPKAP1,TNRC6C,PIAS1,TBC1D5,SPG21,BLK,EBF<br/> 1,TNR,GRM8,DST,CXADR,DOCK4,MBD5,ATRX,NUAK1,PTPRT,EL<br/> AVL4,ABL1,MXI1,PTPN12,HDAC4,OXR1,SLC1A1,PRKAA1,SDC2<br/> ,GAS2,KCNH1,ITGB3BP,MRPS27,LRFN5,CREG1,DROSHA,APBB1<br/> IP,L3MBTL3,EIPR1,APLF,NFAT5,MAST4,GUCY1A2,NBAS,PSMF<br/> 1,SLFN11,RAP1A,NKAIN2,GLIS1,MORC1,MYO10,PGC5,TOX3,C<br/> AMK4,BAZ2A,INPP5A,CPSF3,FGF10,ZC3HAV1,GRID2,TGM1,PE<br/> AK1,LATS2,NRG1,INO80D,GSG1L,CLIP1,ASPM,AP3B1,DENND2<br/> B,RASGRF1,ATP11C,ZNF438,ABCB7,ZBTB16,MUSK,KIR3DL2,Z<br/> NF675,GNF7,SMARCA1,SH3GL3,SETDB2,PRKCE,FOXK2,SLCO3<br/> A1,MED15,SLMAP,NXN,WNK2,ESRRG,ZNF718,DGKB,USP33,DEN<br/> ND4C,FBN2,CD44,RGS12,PTPRO,EGF,PRRC1,ABCC9,P2RX6,TR<br/> IO,PDE3A,EXT1,STXBP6,NSMAF,LNPEP,LIMD1,PEX14,SPRED2<br/> ,RPS6KA3,CTNND2,ATP8A2,SCG5,MTMR3,PTPN2,TRIM5,PLXNA<br/> 2,MCF2L,OR4F15,ATXN3,RFC1,HTR2C,RIC3,CLEC16A,ARHGEF </p> |
|--|--|--|---------------------------------------------------------------------------------------------------------------------------------------------------------------------------------------------------------------------------------------------------------------------------------------------------------------------------------------------------------------------------------------------------------------------------------------------------------------------------------------------------------------------------------------------------------------------------------------------------------------------------------------------------------------------------------------------------------------------------------------------------------------------------------------------------------------------------------------------------------------------------------------------------------------------------------------------------------------------------------------------------------------------------------------------------------------------------------------------------------------------------------------------------------------------------------------------------------------------------------------------------------------------------------------------------------------------------------------------------------------------------------------------------------------------------------------------------------------------------------------------------------------------------------------------------------------------------------------------------------------------------------------------------------------------------------------------------------------------------------------------------------------------------------------------------------------------------------------------------------------------------------------------------------------------------------------------------------------------------------------------------------------------------------------------------------------------------------------------------------------------------------------------------------------------------------------------------------------------------------------------------------------------------------------------------------------------------------------------------------------------------------------------------------------------------------------------------------------------------------------------------------------------------------------------------------------------------------------------------------------------------------------------------------------------------------------------------------------------------------------------------------------------------------------------------------------------------------------------------------------------------------------------------------------------------------------------------------------------------------------------------------------------------------------------------------------------------------------------------------------------------------------------------------------------------------------------------------------------------------------------------------------------------------------------------------------------------------------------------------------------------------------------------------------------------------------------------------------------------------------------------------------------------------------------------------------------------------------------------------------------------------------------------------------------------------------------------------------------------------------------------------------------------------------------------------------------------------------------------------------------------------------------------------------------|

|  |  |  |                                                                                                                                                                                                                                                                                                                                                                                                                                                                                                                                                                                                                                                                                                                                                                                                                                                                                                                                                                                                                                                                                                                                                                                                                                                                                                                                                                                                                                                                                                                                                                                                                                                                                                                                                                                                                                                                                                                                                                                                                                                                                                                                                                                                                                                                                                                                                                                                                                                                                                                                                                                                                                                                                                                                                                                                                                                                                                                                                                                                                                                                                                                                                                                                                                                                                                                                                                                                                                                                                                                                                                                                                                                                                                                                                                                                                                                                                                                                                                                                                     |
|--|--|--|---------------------------------------------------------------------------------------------------------------------------------------------------------------------------------------------------------------------------------------------------------------------------------------------------------------------------------------------------------------------------------------------------------------------------------------------------------------------------------------------------------------------------------------------------------------------------------------------------------------------------------------------------------------------------------------------------------------------------------------------------------------------------------------------------------------------------------------------------------------------------------------------------------------------------------------------------------------------------------------------------------------------------------------------------------------------------------------------------------------------------------------------------------------------------------------------------------------------------------------------------------------------------------------------------------------------------------------------------------------------------------------------------------------------------------------------------------------------------------------------------------------------------------------------------------------------------------------------------------------------------------------------------------------------------------------------------------------------------------------------------------------------------------------------------------------------------------------------------------------------------------------------------------------------------------------------------------------------------------------------------------------------------------------------------------------------------------------------------------------------------------------------------------------------------------------------------------------------------------------------------------------------------------------------------------------------------------------------------------------------------------------------------------------------------------------------------------------------------------------------------------------------------------------------------------------------------------------------------------------------------------------------------------------------------------------------------------------------------------------------------------------------------------------------------------------------------------------------------------------------------------------------------------------------------------------------------------------------------------------------------------------------------------------------------------------------------------------------------------------------------------------------------------------------------------------------------------------------------------------------------------------------------------------------------------------------------------------------------------------------------------------------------------------------------------------------------------------------------------------------------------------------------------------------------------------------------------------------------------------------------------------------------------------------------------------------------------------------------------------------------------------------------------------------------------------------------------------------------------------------------------------------------------------------------------------------------------------------------------------------------------------------|
|  |  |  | <p>7, CD96, ALG10B, ATP8A1, AMBRA1, LTBP1, STK38L, ZFYVE9, KDM7A, OPRM1, HTR2A, PLCXD3, FANCM, FANCA, CYP4A11, DAZL, INPP4B, GTF2F2, KREMEN1, STAC, SEMA3E, TAF3, RPRD1B, MARK2, GCSAML, TMEM67, EBF3, ALPL, ZNF33B, C10ORF90, FHL2, ABHD17C, ADGRA3, CNIH3, PUM1, TMOD2, HERC1, MSH2, IGF2BP3, GNAL, EPHA6, ANKRD17, APBA2, LINGO2, ZNF397, SH3KBP1, SLC2A13, LUC7L, REL11, HIPK3, CDKN2C, EPN2, KCND2, EVC, GRK3, KCDC1, SPSB4, CLSPN, NOS2, BICRAL, AFG3L2, STK10, MOSMO, GFRA2, MNAT1, TMM116, RBBP8, MDFIC, ADAM12, MYLK2, ANK3, EMILIN2, HMGA2, CCND3, BCL11B, VPS41, DOCK5, ECE1, ZIM3, STK32A, CREM, LYPLA1, MBP, LINC01151, TRPS1, PLCE1, TGFA, IL17RA, ANKFN1, HIP1, CRIM1, FUT9, PRR5L, GSR, ATP6V1E1, UTP4, CAPN5, VAV1, RUFY2, MYT1L, FBXO32, ZNF160, TJP1, LDLRAD4, NPHP4, EGFLAM, PACSIN2, CNTN1, HLA-B, IQSEC1, HSF5, SNX3, CACNA1I, NAA35, ZNF367, PDLIM5, KCNJ15, BRCA2, DISC1, ZBTB2, DNER, BLM, ASB7, WDPCP, NRK, SEMA3A, MAGI3, INTS8, LIN54, ADCY10, PSG8, STRN, OR9Q1, ZNF121, BMDP2, RC3H2, UNC5D, ATP9A, TRAK1, PSG9, CDC42BPB, SOGA1, PTCD2, SCN11A, MSR1, VRK1, GNAI1, RALGAPA2, ZC3H14, GFT1B, TBC1D4, RANBP9, RESF1, MYRIP, TTR, RIN3, BMP2K, TMEM161A, SEMA3D, ASXL3, NETO2, PDE6C, CABIN1, POLR3A, LEMD3, RELN, ARHGAP42, HMGB1, GNAQ, FGF9, NFATC2, TDRD7, SH3BP5, UST, CPAMD8, MDM1, SLC23A2, POLR2M, ZNF106, MYOM1, ZNF567, TRAF3, ZNF462, ANKRD26, ESRP1, UNC13B, TTC21B, ETS2, GEMIN5, ZNF875, DSTYK, UIMC1, DOCK1, LRRFIP1, RAP1GAP, PLS1, SRGAP2, IKZF2, NIN, DRAXIN, ATF1, SLAMF1, KCNH8, SMARCA2, ETS1, FAM83B, GLI3, CGAS, SMARCC1, SNX6, AFF3, GABRR2, SMOC2, PCP4, CNKSR3, CASP5, VENTX, GRIK2, IDE, WDR12, MCTP2, KIF15, PRDM10, CUL1, MYEF2, ZFYVE26, ZNF431, RERE, PSD3, MAP2, BTAF1, GAREM1, LAMC1, ZNF618, NEK10, FARP1, MOB1B, ATF2, HIRA, CYLD, UMODL1, BBS4, MAPK8IP1, MX1, PSG6, HIVEP3, COL5A1, GABBR2, PSIP1, ITGA9, CFTR, KPNA1, NELL1, ME2, UBASH3A, RGM, NEU3, MRPL13, KITLG, ZZEFL, DNAJC7, CAMTA1, UBR1, DCC, MYT1, CHRM5, MAP4K3, YLPM1, SLC30A10, RCAN1, GTF2I, RORB, TADA2A, DAB1, MED27, ZNF208, SELENON, RB1CC1, NMD3, AKAP10, PTPRE, PRKN, MTMR2, ZNF608, TBX20, SP110, DLGAP2, AFAP1, MAPK10, DACH1, ZNF541, DPF3, NGEF, GRIN2A, ARID5B, ZBED9, JPH1, TXNRD2, ATXN1, WSB1, LALBA, PRKCH, PKP1, HUNK, FRMD4A, TG, IL6R, FRMPD4, ALS2, RACGAP1, NLRC5, ZNF627, OR51E1, ACO1, TFDP1, CNOT6L, MKNK1, HEMGN, KANK4, DOCK9, SNX25, HULC, FBLN5, KCNQ3, TOX, SHISA9, SLC4A4, PTPRB, ZFP90, PDE6A, COPS8, ZNF124, SCN10A, SHANK2, ST8SIA1, USP7, VAV3, PSMA1, ENPP3, PLAGL1, KCND3, MESD, ITSN2, SOX30, MOK, KIR2DL4, ARHGEF28, RALB, NPAS2, ADGRG6, ROCK1, LYN, VCAM1, SEL1L, ARHGAP28, ARHGAP31, ZNF780B, CTSSB, EIF2B3, TTC37, SLC44A2, SUMO3, SLC15A2, ZNF169, PLEKHB2, KIF11, DTX1, BZW1, TENM2, OVOL2, PIWIL3, ZBTB33, ADA2, NTN1, PLCB4, ZFH3, FANCL, DPYSL5, ZNF44, RRAGD, BANP, SUPT16H, ARID1B, HOXC13, CRACR2A, RNF152, BAZ1A, CASZ1, OTUD7A, INSR, CUL5, OR7A17, BMF, YTHDF3, TFF1, DEDD2, NEK6, HECTD1, GRID1, SHROOM3, COLQ, NMU, DDHD1, PBX3, SUMO2, HS1BP3, ZNF292, ARFGEF1, PDE4DIP, GAST, POGK, SNAI2, ASH1L, IGHV3-74, HOXC4, BID, SIAH2, TANC2, ABCA4, TRABD2B, UFD1, RXRG, SP3, DRAM1, ERN2, GABRG3, ZNF879, MBTPS2, FLNB, TRIM58, TIAL1, TOM1, ELF2, PLPP4, NREP, ZDHHC17, NSD2, FYCO1, SH3GLB1, CD9, CARD10, RALGPS2, JCAD, TWIST2, OR4K2, CTIF, SAMHD1, IFT81, ENPP1, UTRN, RASGRP1, IGSF11, SNX9, TP53I11, TMEM225, ANAPC1, NDRG2, CSNK2A1, BMP5, KCNC1, CSF1, GHRH, HDGFL3, BCL2L1, SERPINB9, SCAF4, MIR3142HG, CTDP1, HCN1, PRKG1, LAMA3, ASB4, GRIN2B, GRB14, INO80, FANCB, GPR156, IGHV2-70D, CLNS1A, CNMD, DHRS3, SMAD5, CELF4, TCERG1, ABCG1, OR4C46, FOXN3, KCNK5, DCUN1D4, SLC40A1, PRAME, MYCL, TNN, CIDECA, PSAP, LPGAT1, MICALL2, MED1, CDC14B, PCNT, KDM6A, ATRN, IL33, AJAP1, GPRC5C, ROR2, CFH, ZNF521, KL, RASGEF1C, BANK1, CSDE1, LMX1A, TMEM178A, IL10, ACTR2, OR1L6, SFPQ, SCML2, PRAMEF25, RIOK1, CLSTN2, PTH, SOSTDC1, PRKAA2, CSF2RB, DIRAS2, SKA1, NDC80, SOHLH1, LARP6, PACRG, PHF20L1, ABHD2, ITPRIP</p> |
|--|--|--|---------------------------------------------------------------------------------------------------------------------------------------------------------------------------------------------------------------------------------------------------------------------------------------------------------------------------------------------------------------------------------------------------------------------------------------------------------------------------------------------------------------------------------------------------------------------------------------------------------------------------------------------------------------------------------------------------------------------------------------------------------------------------------------------------------------------------------------------------------------------------------------------------------------------------------------------------------------------------------------------------------------------------------------------------------------------------------------------------------------------------------------------------------------------------------------------------------------------------------------------------------------------------------------------------------------------------------------------------------------------------------------------------------------------------------------------------------------------------------------------------------------------------------------------------------------------------------------------------------------------------------------------------------------------------------------------------------------------------------------------------------------------------------------------------------------------------------------------------------------------------------------------------------------------------------------------------------------------------------------------------------------------------------------------------------------------------------------------------------------------------------------------------------------------------------------------------------------------------------------------------------------------------------------------------------------------------------------------------------------------------------------------------------------------------------------------------------------------------------------------------------------------------------------------------------------------------------------------------------------------------------------------------------------------------------------------------------------------------------------------------------------------------------------------------------------------------------------------------------------------------------------------------------------------------------------------------------------------------------------------------------------------------------------------------------------------------------------------------------------------------------------------------------------------------------------------------------------------------------------------------------------------------------------------------------------------------------------------------------------------------------------------------------------------------------------------------------------------------------------------------------------------------------------------------------------------------------------------------------------------------------------------------------------------------------------------------------------------------------------------------------------------------------------------------------------------------------------------------------------------------------------------------------------------------------------------------------------------------------------------------------------------|

|  |  |  |                                                                                                                                                                                                                                                                                                                                                                                                                                                                                                                                                                                                                                                                                                                                                                                                                                                                                                                                                                                                                                                                                                                                                                                                                                                                                                                                                                                                                                                                                                                                                                                                                                                                                                                                                                                                                                                                                                                                                                                                                                                                                                                                                                                                                                                                                                                                                                                                                                                                                                                                                                                                                                                                                                                                                                                                                                                                                                                                                                                                                                                                                                                                                                                                                                                                                                                                                                                                                                                                                                                                                                                                                                                                                                                                                                                                                                                                                          |
|--|--|--|------------------------------------------------------------------------------------------------------------------------------------------------------------------------------------------------------------------------------------------------------------------------------------------------------------------------------------------------------------------------------------------------------------------------------------------------------------------------------------------------------------------------------------------------------------------------------------------------------------------------------------------------------------------------------------------------------------------------------------------------------------------------------------------------------------------------------------------------------------------------------------------------------------------------------------------------------------------------------------------------------------------------------------------------------------------------------------------------------------------------------------------------------------------------------------------------------------------------------------------------------------------------------------------------------------------------------------------------------------------------------------------------------------------------------------------------------------------------------------------------------------------------------------------------------------------------------------------------------------------------------------------------------------------------------------------------------------------------------------------------------------------------------------------------------------------------------------------------------------------------------------------------------------------------------------------------------------------------------------------------------------------------------------------------------------------------------------------------------------------------------------------------------------------------------------------------------------------------------------------------------------------------------------------------------------------------------------------------------------------------------------------------------------------------------------------------------------------------------------------------------------------------------------------------------------------------------------------------------------------------------------------------------------------------------------------------------------------------------------------------------------------------------------------------------------------------------------------------------------------------------------------------------------------------------------------------------------------------------------------------------------------------------------------------------------------------------------------------------------------------------------------------------------------------------------------------------------------------------------------------------------------------------------------------------------------------------------------------------------------------------------------------------------------------------------------------------------------------------------------------------------------------------------------------------------------------------------------------------------------------------------------------------------------------------------------------------------------------------------------------------------------------------------------------------------------------------------------------------------------------------------------|
|  |  |  | <p>,VSTM2A,MAP6,VASP,PLA2G4A,ETV6,PALMD,RAB12,IQGAP1,RP<br/> PS12,CAMLG,COX7A2L,ZBTB7C,TEAD1,MORC2,SREBF2,ANP32B<br/> ,YBX3,AIMP1,THNSL2,FYB2,NRXN1,PCID2,HIPK1,ZNF234,CI<br/> SD1,ZNF518A,DGKK,FRY,SNAP91,CD70,CIBAR1,PBLD,FICD,C<br/> ADM1,CENPE,PEG10,LMX1B,NET1,SIPA1L2,NGDN,ELOC,ANLN,<br/> TWIST1,AKT3,ALKAL2,JAK2,VSX1,RPF2,FSTL1,ZBTB38,ISX,<br/> SVEP1,MADD,HCRTR1,RBM19,PTGS1,PATL1,ZNF287,CELSR2,Z<br/> NF449,PRSS2,FH,CREBBP,MELTF,TNKS,GORAB,PCNA,STAH3,U<br/> FL1,ADAMTS5,NFKBIA,PRKCB,OR2T3,ABCC8,ANXA4,CACNA1E,<br/> ZC3H15,ANP32A,RFC2,ZNF354C,ALX4,RTRAF,USH1C,BRD4,ZB<br/> TB21,SERBP1,NEDD9,OLFM4,NRBP1,ITGA6,ATP2B1,GAP43,AS<br/> S1,MTCL1,GRIP1,IGHV10R15-<br/> 9,CTNBL1,ADGRE3,SAR1A,ADCY9,PPP1R17,CNIH1,MAST2,HP<br/> SE2,BTG3,ZNF528,ERLIN2,ZNF611,UBAP2,OTOP1,CIDEA,ARF<br/> GEF3,ZBTB49,EXT2,EXOC1,HEPACAM,KRT6A,STOX2,AGO1,MEO<br/> X2,SLC6A1,GID8,ELL2,STAT1,BRMS1L,NDFIP2,NR2C1,MAP2K<br/> 6,CMTM7,DGKG,KCNJ18,GATAD1,MTPN,ABI1,CEMIP,PRAMEF2,<br/> POU6F2,IMPACT,CCBE1,PARK7,ADAMTS18,MAPK8,ITGA4,OAZ2<br/> ,MED12L,ZSCAN30,FBXL17,UBL7,POU1F1,UBE2J2,ADCYAP1R1<br/> ,MTF2,NCAPG2,TM9SF4,RAPGEF4,OR6C75,FOXP2,ASB2,MYOCD<br/> ,CEP120,ZSCAN5C,CYFIP2,HNRNPM,ASCC2,EFHB,OR13C9,ARI<br/> D3B,MEF2C,ZNF613,ADGRB1,RXRA,WNT7A,RBPM5,MAP3K5,ND<br/> FIP1,MAP3K4,TRIM43B,WASF3,S100B,SERPINI2,PRDM13,TRI<br/> M43,FOXO6,ERI1,ZNF112,ATP6V1C2,C16ORF72,MAGEL2,PKN2<br/> ,RAD51AP1,OR10H2,PDE2A,RAB38,LRRC2,DBF4B,FBXW8,SDCB<br/> P,NECTIN1,JPT2,SPPL2B,NSMCE1,ZNF813,WWOX,ZBTB25,PAS<br/> K,MLLT1,NCK1,FLVCR1,SCAF8,FGR,CWC22,CDCA8,PPP2R3A,D<br/> NMBP,ATP6V1B2,CXCL2,TOPI,MLLT10,C2,IFNAR1,RNF8,NGG1<br/> 2,EPHA4,CYTH4,INTS13,GABRA5,MECOM,DNMT3L,NTRK2,IL1R<br/> APL1,NUMB,LHX9,ADAMTS9,WNT2B,COLEC12,ZBTB10,TNNI1,O<br/> CLN,POSTN,CREB5,MIR548H4,CD101,SHISA6,MEGF10,IL17RD<br/> ,FBXO31,EXTL3,AKAP11,GRIK1,PRKAB1,DTHD1,IREB2,MVB12<br/> B,PTK2,MARK4,CDH5,CD5L,RCAN2,ANKRD6,SCGN,NFKBID,ARH<br/> GAP12,CLDN18,ASCL3,MPP7,DIAPH1,FEZ2,INIP,LAMB1,MIR1<br/> 7HG,APIP,CYFIP1,UBE3A,PCDH8,SEMA4D,JAM2,SERPINB10,P<br/> ITPNC1,FRMD6,MC2R,ZBTB20,FAT4,IMPA2,ZNF66,RUNX1,AKR<br/> 1B1,C9,KIRREL1,WNT5B,RASGEF1B,AMFR,SAXO1,NENF,SH2D1<br/> B,POMT2,PTGFR,ZNF845,OR4L1,ASAP1,SAMD13,ICA1,PLCZ1,<br/> EDIL3,NOS1AP,MTPP,FCRLA,DIDO1,TPTE,SORBS2,PDCL3,SRP<br/> 9,CNKSR1,CCDC88A,GPR55,NSUN2,CHCHD2,ADAMTS16,CDC45,<br/> OR11G2,BICD1,TNFSF11,FYN,BUB1,KDM5A,PCBP3,MYL12B,ZN<br/> F705G,PPM1F,ADGRL2,ARL13B,SDE2,RBMS3,UHRF2,SCN8A,HD<br/> AC2,AVEN,SLF1,GON4L,TBX15,SH2D3C,PSME3IP1,DOCK3,TRN<br/> AU1AP,NCSI1,COL18A1,LHFPL2,ALB,DOK5,NALCN,ZFYVE28,MA<br/> PK9,PABPC1,CRTAM,APELA,SLC39A8,ROR1,OPA3,FUT8,TET1,<br/> ARNT2,ASB3,HECW2,CDH2,ITGA8,FBXL20,NTN4,RAD9A,XRN2,<br/> PHLPP1,GPR137B,EPHB1,RP1L1,GRM5,ADCK1,RAI14,SPOPL,Z<br/> NF705D,RPS6KA5,SPTB,TBC1D1,LRRC69,PTPRG,PID1,NRP1,M<br/> IDEAS,FCHSD2,SDK1,PRKCA,ATPCKMT,FAIM,SAMD12,FHIT,I<br/> TGA1,ZNF615,KLF12,RNF138,RC3H1,NRIP1,CHODL,POR,ZNF8<br/> 50,ZNF235,MCC,ZNF738,SUPT3H,BCR,TUT4,NRXN3,ELMO1,RG<br/> S6,REERG,ZNF215,TCERG1L,KIF16B,PRIM2,SNRK,C14ORF39,T<br/> M9SF2,ELP2,FBLN1,STK36,NSG2,RAG1,KCNJ6,B9D1,RRAS2,G<br/> NA14,ZNF678,BMPER,PRDM15,CUX1,DPP6,SRGAP3,ZNF420,MA<br/> CROH2A1,MITF,EPHB2,TSPAN13,TOGARAM1,CSNK1G1,SACS,BC<br/> L2L13,CD38,EYA4,DPH6,CDK14,AKAIN1,MET,SPPL3,CDH17,Z<br/> NF705B,ATP6V0D2,PPF1A2,CDH13,MED13L,STXBP4,SERPINB2<br/> ,CACNG3,ATG5,MAGI2,PRDM11,VMP1,UNK,FAM171A1,MLIP,FL<br/> RT2,MYB,KALRN,ZNF704,SLC1A2,GNAS,LAMA1,MFHAS1,SERPI<br/> NB7,ATRNL1,TIAM2,DHX29,BMP7,TTC28,ASTN2,DLG5,TNFAIP<br/> 8,ZMYND8,GAPVD1,GABRA2,RNF217,KCTD1,OR2T2,ZNF74,BPT<br/> F,BTBD10,ZMYND11,TMEM25,NUDT21,GRM3,KMT2C,DDX6,ADGR<br/> F5,OR4N2,PDGFC,WDR41,PLIN2,PPP1R13B,FOCAD,ABL2,MMP2<br/> 6,BACE2,RFK2,PARBP,NECAB1,PKNOX2,EYA1,FHOD3,PRPF18<br/> ,SLIT2,EXOC4,CNOT7,KCNIP4,ESCO1,KCTD8,PLCL1,ERBB4,I<br/> L20RB,SERPINB11,FAM3B,GSAP,TRHDE,SYNDIG1,ROBO1,SAMD</p> |
|--|--|--|------------------------------------------------------------------------------------------------------------------------------------------------------------------------------------------------------------------------------------------------------------------------------------------------------------------------------------------------------------------------------------------------------------------------------------------------------------------------------------------------------------------------------------------------------------------------------------------------------------------------------------------------------------------------------------------------------------------------------------------------------------------------------------------------------------------------------------------------------------------------------------------------------------------------------------------------------------------------------------------------------------------------------------------------------------------------------------------------------------------------------------------------------------------------------------------------------------------------------------------------------------------------------------------------------------------------------------------------------------------------------------------------------------------------------------------------------------------------------------------------------------------------------------------------------------------------------------------------------------------------------------------------------------------------------------------------------------------------------------------------------------------------------------------------------------------------------------------------------------------------------------------------------------------------------------------------------------------------------------------------------------------------------------------------------------------------------------------------------------------------------------------------------------------------------------------------------------------------------------------------------------------------------------------------------------------------------------------------------------------------------------------------------------------------------------------------------------------------------------------------------------------------------------------------------------------------------------------------------------------------------------------------------------------------------------------------------------------------------------------------------------------------------------------------------------------------------------------------------------------------------------------------------------------------------------------------------------------------------------------------------------------------------------------------------------------------------------------------------------------------------------------------------------------------------------------------------------------------------------------------------------------------------------------------------------------------------------------------------------------------------------------------------------------------------------------------------------------------------------------------------------------------------------------------------------------------------------------------------------------------------------------------------------------------------------------------------------------------------------------------------------------------------------------------------------------------------------------------------------------------------------------|

|            |                    |                       |                                                                                                                                                                                                                                                                                                                                                                                                                                                                                                                                                                                                                                                                                                                                                                                                                                                                                                                                                                                                                                                                                                                                                                                                                                                                                                                                                                                                                                                                                                                                                                                                                                                                                                                                                                                                                                                                                                                                                                                                                                                                                                                                                                                                                                                                                                                                                                                                                                                                                                                                                                                                        |
|------------|--------------------|-----------------------|--------------------------------------------------------------------------------------------------------------------------------------------------------------------------------------------------------------------------------------------------------------------------------------------------------------------------------------------------------------------------------------------------------------------------------------------------------------------------------------------------------------------------------------------------------------------------------------------------------------------------------------------------------------------------------------------------------------------------------------------------------------------------------------------------------------------------------------------------------------------------------------------------------------------------------------------------------------------------------------------------------------------------------------------------------------------------------------------------------------------------------------------------------------------------------------------------------------------------------------------------------------------------------------------------------------------------------------------------------------------------------------------------------------------------------------------------------------------------------------------------------------------------------------------------------------------------------------------------------------------------------------------------------------------------------------------------------------------------------------------------------------------------------------------------------------------------------------------------------------------------------------------------------------------------------------------------------------------------------------------------------------------------------------------------------------------------------------------------------------------------------------------------------------------------------------------------------------------------------------------------------------------------------------------------------------------------------------------------------------------------------------------------------------------------------------------------------------------------------------------------------------------------------------------------------------------------------------------------------|
|            |                    |                       | <p>4A,PBX1,IRAG1,NPAS3,NUF2,PRKCQ,ANTXR1,NDRG1,SORCS2,SIPA1L3,TRDN,MGMT,ZNF679,NLGN1,CTTNBP2,SHLD2,NOS1,SLC6A3,PRR16,ASIC2,EFNA5,TCF12,GAS2L1,ARHGEF11,RAB27A,NSD1,EHMT1,SLIT3,DTNA,KIF13A,FRMD5,ESR1,MYO9B,NTNG1,KDM4B,KCNQ5,LOXL2,CACNA2D1,NYAP2,IQGC3,IQCI-SCHIP1,ADGRG7,SKAP2,PRLR,AGO3,HTT,FOXB1,RAD51B,CAMK1D,PIK3R3,HLA-F,FER,ZNF302,EYA2,CCR2,STARD13,INTS12,A2M,CHFR,ZNF721,EPS8,OSBPL6,JAZF1,ZNF578,ZNF891,SPOCK3,SEMA4B,NRF1,IGHV1OR21-1,ZNF14,HRH1,PHC2,GRIA4,ROCK2,PRDM1,RORA,STMP1,IL16,ATAT1,DMRT1,EIF4G3,CDCA5,PPP1CB,CATSPER2,RGS8,RAB31,PKD1,HSPG2,PSMD2,CSMD3,HERPUD1,NCOA6,TRIM2,COL4A3,WASHC1,ZFP30,RGS7,HOKK3,KIF7,GNG2,FSTL4,CLDN10,BARD1,STK3,DEPTOR,ZNF423,C1QL3,RSU1,PNPLA8,ZNF568,HNRNPU,CEP72,RAB3GAP2,CADPS,APCDD1,IGF1R,KCNAB1,PRKAG2,GLI2,THRB,AKAP13,MORC3,ATP10A,DNM1L</p>                                                                                                                                                                                                                                                                                                                                                                                                                                                                                                                                                                                                                                                                                                                                                                                                                                                                                                                                                                                                                                                                                                                                                                                                                                                                                                                                                                                                                                                                                                                                                                                                                                                                                                                                                                                            |
| GO:0007154 | cell communication | 6.028348848483416e-22 | <p>NOTCH2,BCAR3,MTOR,CNTN4,NSG1,SGCD,WWC1,GARNL3,LRP12,PTPRD,SLC24A2,FREM1,LRRRC4,ANKS1B,MYO9A,ULK2,NLK,UNC13C,KSR1,PLCB1,ZNF536,TAF4A,TENM4,DLC1,ZDHHC21,PTPRA,ITPR2,RIPOR2,PDE4D,RDX,RP1,STXBP1,ERC1,RALA,IL1RAPL2,BCL2,PRDM16,ALDH1A2,ARHGAP26,FBN1,LRFN2,CDH8,CHRNA7,DCDC1,GPR158,ROBO2,RIMS1,PIK3C3,TENM3,GABRB3,ZEB1,AKR1C3,RARB,FGD4,SPRED1,ENPEP,MYO1E,PLPPR1,MINAR1,CDC42EP3,RIMS2,ALK,AUTS2,ADGRE1,MCTP1,PJA2,BABAM2,SV2C,ERBIN,RHPN2,RIN2,ANO6,CACNG2,DLGAP1,MLLT3,GPC6,CNTNAP2,MAP3K9,APC,HHLA2,TSHZ3,PLPPR5,DSCAM,CKL,ILDR2,ERG,ARHGAP24,TNIK,SLC4A10,PTPRJ,KDM4C,DOCK10,EGFR,RFX3,DENND1A,USP14,ANGPT1,MACF1,CTNNA3,PRKACB,RGS3,NCOR1,RNF220,DOCK2,NEDD4,MAML2,SCAI,CRB1,BTBD9,FAM83F,SGMS1,GRIK3,CHSY1,NTRK3,RXFP1,C5,PDE1C,ZFAND6,DKK2,FLT1,RABEP1,MAPKBP1,GABRB1,DGKI,INVS,EDAR,GRIA1,NEO1,CNTN6,SLC39A12,SLC8A3,TOM1L2,PRKD1,TPTP2,PAK1,GMDS,EPAH7,CTNNA1,CHRM3,RALGPS1,SPEN,RAPGEF2,PELI2,LRP2,ADGRB3,RUNX2,FGF12,GABRA6,TAOK3,ONECUT1,CPEB4,TMEM38B,PRICKLE2,TAF4A,BTBD11,PTPRN2,SYN2,CCL28,PATJ,GRM7,RPTOR,TMEM117,GHR,COL4A2,RALGAP1,RAPGEF5,PPP1R12B,TRPM1,ADAM10,IL1R1,APBB2,APP,RPS6KA2,CACNA1C,CACNB2,DCLK1,STAU2,GABRG2,DOCK8,MAPRE2,USP18,SEMA5A,SYT1,ARHGAP44,NTF3,ACER2,NDUFAF2,CD2AP,AURKA,ST18,PYGO1,SLC8A1,HERPUD2,PTPRR,TAF4A,ABCG8,KANK1,MAP4K4,BMPR1B,FMN2,PCSK6,AKAP6,HOMER2,ARNT,RAB8B,PAK3,RFTN1,PDE1A,KCNK10,LARP1,ITPKB,RGS20,PDE10A,RAP1GDS1,HHAT,KICS2,ERC2,NBN,SYN3,IFT57,INTS7,PRKCZ,BTLA,GRB10,MSH6,ARHGAP32,RGS9,HECW1,DEFA3,DUSP22,SV2B,YAP1,PPM1L,SHC4,MAPK1,MGAT5,CADPS2,HRH2,ALCAM,PLG,PDGFD,SYT10,ZNRF3,PPP1R1C,ITGBL1,ARHGEF17,NRG3,UBE2O,NCAM1,GFRA1,SLC16A1,STK38,PTPN13,CHN1,HRH4,SORCS3,GLP2R,PAFAH1B1,ATF6,EFEMP1,TM7SF3,ITGB8,TLK1,NF2,CNKS2,GRIK4,HIVEP1,CTNNA1,PPP1R9A,MOB3B,BIRC6,AKAP9,KLF15,RASGRF2,PPARA,ERMP1,RGL1,SYNJ1,NR5A2,ADAMTS3,TIAM1,ARAP2,GRM1,PTPRK,ARHGEF12,GABRG1,PAK5,TREMF1,PCDH11Y,PPP2R5E,PLA2R1,SEMA3C,DAPK1,SLC24A4,SEC14L1,TMEM108,STK32B,MAGI1,ALPK2,SCN2A,RIC8B,SORCS1,DNAJC15,AMPH,CPE,EVC2,IL34,ANK2,ADGRV1,MELK,RYR2,BBS2,WNT9B,OR4F6,NKG7,SEMA6D,DUSP16,SMARCA4,CDH11,USP8,PARD3,MAPKAP1,PIAS1,SPG21,BLK,TNR,GRM8,DST,CXADR,DOCK4,MBD5,ATRX,NUAK1,PTPRT,ELAVL4,ABL1,PTPN12,HDAC4,SLC1A1,PRKAA1,GAS2,KCNH1,ITGB3BP,RIMBP2,APBB1IP,EIPR1,APLF,NFAT5,MAST4,GUCY1A2,RAP1A,MYO10,GPC5,CAMK4,INPP5A,FGF10,ZC3H4V1,GRID2,LATS2,NRG1,GSG1L,ASPM,AP3B1,DENND2B,RASGRF1,MUSK,ZNF675,GNG7,SH3GL3,PRKCE,NXN,WNK2,ESRRG,DGKB,USP33,DENND4C,FBN2,CD44,RGS12,PTPRO,EGF,P2RX6,TRIO,PDE3A,EXT1,NSMAF,LNPEP,LIMD1,SPRED2,RPS6KA3,CTNND2,SCG5,MTMR3,PTPN2,TRIM5,PLXNA2,MCF2L,OR4F15,ATXN3,HTR2C,RIC3,CLEC16A,ARHGEF7,AMBRA</p> |

|  |  |  |                                                                                                                                                                                                                                                                                                                                                                                                                                                                                                                                                                                                                                                                                                                                                                                                                                                                                                                                                                                                                                                                                                                                                                                                                                                                                                                                                                                                                                                                                                                                                                                                                                                                                                                                                                                                                                                                                                                                                                                                                                                                                                                                                                                                                                                                                                                                                                                                                                                                                                                                                                                                                                                                                                                                                                                                                                                                                                                                                                                                                                                                                                                                                                                                                                                                                                                                                                                                                                   |
|--|--|--|-----------------------------------------------------------------------------------------------------------------------------------------------------------------------------------------------------------------------------------------------------------------------------------------------------------------------------------------------------------------------------------------------------------------------------------------------------------------------------------------------------------------------------------------------------------------------------------------------------------------------------------------------------------------------------------------------------------------------------------------------------------------------------------------------------------------------------------------------------------------------------------------------------------------------------------------------------------------------------------------------------------------------------------------------------------------------------------------------------------------------------------------------------------------------------------------------------------------------------------------------------------------------------------------------------------------------------------------------------------------------------------------------------------------------------------------------------------------------------------------------------------------------------------------------------------------------------------------------------------------------------------------------------------------------------------------------------------------------------------------------------------------------------------------------------------------------------------------------------------------------------------------------------------------------------------------------------------------------------------------------------------------------------------------------------------------------------------------------------------------------------------------------------------------------------------------------------------------------------------------------------------------------------------------------------------------------------------------------------------------------------------------------------------------------------------------------------------------------------------------------------------------------------------------------------------------------------------------------------------------------------------------------------------------------------------------------------------------------------------------------------------------------------------------------------------------------------------------------------------------------------------------------------------------------------------------------------------------------------------------------------------------------------------------------------------------------------------------------------------------------------------------------------------------------------------------------------------------------------------------------------------------------------------------------------------------------------------------------------------------------------------------------------------------------------------|
|  |  |  | <p>1,LTBP1,STK38L,ZFYVE9,OPRM1,ABCC4,HTR2A,PLCXD3,FANCA,INPP4B,KREMEN1,STAC,SEMA3E,MARK2,GCSAML,FHL2,ADGRA3,CNIH3,PUM1,TMOD2,MSH2,GNAL,EPHA6,ANKRD17,APBA2,SH3KBP1,RELL1,HIPK3,EPN2,KCND2,EVC,GRK3,KNDC1,SPSB4,CLSPN,NOS2,MOSMO,GFRA2,TMEM116,RBBP8,MDFIC,ADAM12,MYLK2,ANK3,SNTG1,HMGA2,CCND3,VPS41,DOCK5,ECE1,STK32A,CREM,MBP,PLCE1,TGFA,IL17RA,HIP1,CRIM1,PRR5L,CAPN5,VAV1,LDLRAD4,NPHP4,PACSIN2,CNTN1,IQSEC1,SNX3,CACNA1I,BRCA2,DISC1,DNER,BLM,ASB7,WDPCP,NRK,SEMA3A,MAGI3,ADCY10,PSG8,STRN,OR9Q1,BMP2,RC3H2,UNC5D,PSG9,CDC42BPB,SOGA1,SCN11A,VRK1,GNAI1,RALGAPA2,RANBP9,MYRIP,TTR,RIN3,BMP2K,TMEM161A,SEMA3D,NETO2,PDE6C,CABIN1,LEMD3,RELN,ARHGAP42,HMGB1,GNAQ,FGF9,NFATC2,SH3BP5,POLR2M,ZNF106,MYOM1,TRAF3,UNC13B,TTC21B,DSTYK,UIMC1,DOCK1,RAP1GAP,SRGAP2,DRAXIN,ATF1,CCDC186,SLAMF1,FAM83B,GLI3,CGAS,SMARCC1,SNX6,GABRR2,SMOC2,PCP4,CNKSR3,CASP5,GRIK2,IDE,WDR12,MCTP2,CUL1,PSD3,GAREM1,LAMC1,NEK10,FARP1,MOB1B,ATF2,CYLD,BBS4,MAPK8IP1,MX1,PSG6,GABBR2,ITGA9,CFTR,KPNA1,UBASH3A,RGMB,NEU3,KITLG,ZZEF1,CAMTA1,UBR1,DCC,CHRM5,MAP4K3,SLC30A10,RCAN1,RORB,DAB1,RB1CC1,AKAP10,PTPRE,PRKN,MTMR2,TBX20,DLGAP2,AFAPI,MAPK10,NGEF,GRIN2A,ARID5B,WSB1,LALBA,PRKCH,PKP1,HUNK,TG,IL6R,ALS2,RACGAP1,NLRC5,OR51E1,MKNK1,DOCK9,SNX25,KCNQ3,SHISA9,PDE6A,COPS8,SCN10A,SHANK2,USP7,VAV3,MESD,SOX30,MOK,KIR2DL4,ARHGEF28,RALB,ADGRG6,ROCK1,LYN,VCAM1,SEL1L,ARHGAP28,ARHGAP31,EIF2B3,SLC44A2,SLC15A2,DTX1,TENM2,OVOL2,ZBTB33,ADA2,NTN1,CHKA,PLCB4,DPYSL5,RRAGD,CRACR2A,RNF152,OTUD7A,INSR,CUL5,OR7A17,BMF,YTHDF3,TFF1,DEDD2,NEK6,GRID1,COLQ,NMU,ARFGEF1,GAST,SNAI2,ASH1L,IGHV3-74,BID,SIAH2,RPH3A,ABCA4,TRABD2B,UFD1,RXRG,ERN2,GABRG3,MBTPS2,FLNB,TIAL1,TOM1,PLPP4,NREP,ZDHHC17,SH3GLB1,CARD10,RALGPS2,JCAD,OR4K2,SAMHD1,IFT81,ENPP1,RASGRP1,IGSF11,NDRG2,CSNK2A1,BMP5,CSF1,GHRH,HDGFL3,BCL2L1,HCN1,PRKG1,LAMA3,ASB4,GRIN2B,GRB14,GPR156,IGHV2-70D,DHRS3,SMAD5,CELF4,OR4C46,FOXN3,PRAME,TNN,PSAP,MED1,CDC14B,PCNT,IL33,GPRC5C,ROR2,KL,RASGEF1C,BANK1,FAT1,IL10,OR1L6,SFPQ,CLSTN2,PTH,SOSTDC1,PRKAA2,CSF2RB,DIRAS2,NDC80,ABHD2,ITPRIP,PLA2G4A,RAB12,IQGAP1,RPS12,CAMLG,TEAD1,SREBF2,YBX3,AIMP1,THYSL2,FYB2,NRXN1,PCID2,HIPK1,DGKK,CD70,CIBAR1,PBLD,FICD,PEG10,NET1,SIPA1L2,TWIST1,AKT3,ALKAL2,JAK2,RPF2,FSTL1,SVEP1,MADD,HCRTR1,CELSR2,CREBBP,TNKS,GORAB,UFL1,NFKBIA,PRKCB,OR2T3,ABCC8,ANXA4,CACNA1E,ZC3H15,ANP32A,BRD4,NEDD9,OLFM4,NRBP1,ITGA6,ATP2B1,GAP43,GRIP1,IGHV10R15-9,ADGRE3,ADCY9,PPP1R17,CNIH1,MAST2,ERLIN2,OTOP1,CIDEA,ARFGEF3,EXT2,EXOC1,SLC6A1,GID8,STAT1,BRMS1L,NDFIP2,NR2C1,MAP2K6,CMTM7,DGKG,ABI1,IMPACT,CCBE1,PARK7,ADAMTS18,MAPK8,ITGA4,FBXL17,ADCYAP1R1,NCAPG2,RAPGEF4,OR6C75,ASB2,MYOCD,MYH13,CYFIP2,EFHB,OR13C9,MEF2C,ADGRB1,RXRA,WNT7A,RBPMS2,MAP3K5,NDFIP1,MAP3K4,S100B,ATP6V1C2,C16ORF72,PKN2,OR10H2,PDE2A,RAB38,LRRC2,SDCBP,JPT2,SPPL2B,WWOX,PASK,NCK1,FGR,CDCA8,PPP2R3A,DNMBP,CXCL2,SNAP29,IFNAR1,GNG12,EPHA4,CYTH4,GABRA5,MECOM,NTRK2,IL1RAPL1,WNT2B,COLEC12,POSTN,CD101,SHISA6,IL17RD,FBXO31,AKAP11,GRIK1,PRKAB1,DTHD1,MVB12B,PTK2,MARK4,CDH5,RCAN2,ANKRD6,SCGN,NFKBID,ARHGAP12,CLDN18,FEZ2,INIP,LAMB1,APIP,CYFIP1,UBE3A,PCDH8,SEMA4D,PITPNC1,MC2R,FAT4,IMPA2,WNT5B,RASGEF1B,AMFR,NENF,PTGFR,ZFYVE1,OR4L1,ICA1,PLCZ1,NOS1AP,FCRLA,DIDO1,TPTE,SORBS2,CNKSR1,CCDC88A,GPR55,NSUN2,CDC45,OR11G2,BICD1,TNFSF11,FYN,BUB1,PPM1F,ADGRL2,ARL13B,SDE2,RBMS3,SCN8A,HDAC2,SH2D3C,DOCK3,ALB,DOK5,ZFYVE28,MAPK9,APELA,ROR1,FUT8,TET1,ASB3,CDH2,ITGA8,FBXL20,NTN4,RAD9A,PHLPP1,GPR137B,EPHB1,RP1L1,GRM5,RAI14,RPS6KA5,TBC1D</p> |
|--|--|--|-----------------------------------------------------------------------------------------------------------------------------------------------------------------------------------------------------------------------------------------------------------------------------------------------------------------------------------------------------------------------------------------------------------------------------------------------------------------------------------------------------------------------------------------------------------------------------------------------------------------------------------------------------------------------------------------------------------------------------------------------------------------------------------------------------------------------------------------------------------------------------------------------------------------------------------------------------------------------------------------------------------------------------------------------------------------------------------------------------------------------------------------------------------------------------------------------------------------------------------------------------------------------------------------------------------------------------------------------------------------------------------------------------------------------------------------------------------------------------------------------------------------------------------------------------------------------------------------------------------------------------------------------------------------------------------------------------------------------------------------------------------------------------------------------------------------------------------------------------------------------------------------------------------------------------------------------------------------------------------------------------------------------------------------------------------------------------------------------------------------------------------------------------------------------------------------------------------------------------------------------------------------------------------------------------------------------------------------------------------------------------------------------------------------------------------------------------------------------------------------------------------------------------------------------------------------------------------------------------------------------------------------------------------------------------------------------------------------------------------------------------------------------------------------------------------------------------------------------------------------------------------------------------------------------------------------------------------------------------------------------------------------------------------------------------------------------------------------------------------------------------------------------------------------------------------------------------------------------------------------------------------------------------------------------------------------------------------------------------------------------------------------------------------------------------------|

|            |           |                       |                                                                                                                                                                                                                                                                                                                                                                                                                                                                                                                                                                                                                                                                                                                                                                                                                                                                                                                                                                                                                                                                                                                                                                                                                                                                                                                                                                                                                                                                                                                                                                                                                                                                                                                                                                                                                                                                                                                                                                                                                                                                                                                                                                                                                                                                                                                                                                                                                                                                                                    |
|------------|-----------|-----------------------|----------------------------------------------------------------------------------------------------------------------------------------------------------------------------------------------------------------------------------------------------------------------------------------------------------------------------------------------------------------------------------------------------------------------------------------------------------------------------------------------------------------------------------------------------------------------------------------------------------------------------------------------------------------------------------------------------------------------------------------------------------------------------------------------------------------------------------------------------------------------------------------------------------------------------------------------------------------------------------------------------------------------------------------------------------------------------------------------------------------------------------------------------------------------------------------------------------------------------------------------------------------------------------------------------------------------------------------------------------------------------------------------------------------------------------------------------------------------------------------------------------------------------------------------------------------------------------------------------------------------------------------------------------------------------------------------------------------------------------------------------------------------------------------------------------------------------------------------------------------------------------------------------------------------------------------------------------------------------------------------------------------------------------------------------------------------------------------------------------------------------------------------------------------------------------------------------------------------------------------------------------------------------------------------------------------------------------------------------------------------------------------------------------------------------------------------------------------------------------------------------|
|            |           |                       | <p>1,LRRC69,PTPRG,PID1,NRP1,FCHSD2,PRKCA,FAIM,SAMD12,FHIT,ITGA1,RNF138,RC3H1,POR,MCC,BCR,NRXN3,ELMO1,RGS6,REGR,KIF16B,SNRK,ELP2,FBLN1,STK36,NSG2,B9D1,RRAS2,GNA14,BMPER,PRDM15,SRGAP3,MITF,EPHB2,CSNK1G1,CD38,EYA4,CDK14,MET,SPPL3,DLG2,CDH17,CDH13,STXBP4,CACNG3,ATG5,MAGI2,PRDM11,FLRT2,KALRN,SLC1A2,GNAS,LAMA1,MFHAS1,ATRNL1,TIAM2,BMP7,DLG5,GAPVD1,GABRA2,OR2T2,ZMYND11,TMEM25,GRM3,ADGRF5,OR4N2,PDGFC,PLIN2,PPP1R13B,ABL2,EYA1,SLIT2,EXOC4,CNOT7,KCTD8,PLCL1,ERBB4,IL20RB,FAM3B,TRHDE,ROBO1,IRAG1,NUF2,PRKCQ,NDRG1,SORCS2,SIPA1L3,TRDN,NLGN1,NOS1,SLC6A3,ASIC2,EFNA5,GAS2L1,ARHGEF11,SLIT3,DTNA,ESR1,MYO9B,NTNG1,CACNA2D1,NYAP2,IGLC3,IQCJ-SCHIP1,ADGRG7,SKAP2,PRLR,AGO3,HTT,FOXB1,PIK3R3,FER,EYA2,CCR2,STARD13,CHFR,EPS8,SEMA4B,IGHV10R21-1,HRH1,GRIA4,ROCK2,RORA,IL16,DMRT1,PPP1CB,RGS8,PDK1,HERPUD1,COL4A3,RGS7,KIF7,GNG2,FSTL4,BARD1,STK3,DEPTOR,ZNF423,RSU1,CADPS,APCDD1,IGF1R,PRKAG2,GLI2,THRB,AKAP13,DNM1L</p>                                                                                                                                                                                                                                                                                                                                                                                                                                                                                                                                                                                                                                                                                                                                                                                                                                                                                                                                                                                                                                                                                                                                                                                                                                                                                                                                                                                                                                                                                                                                                                         |
| GO:0023052 | signaling | 2.171776249778723e-21 | <p>NOTCH2,BCAR3,MTOR,CNTN4,NSG1,SGCD,WWC1,GARNL3,LRP12,PTPRD,SLC24A2,LRRC4C,ANKS1B,MYO9A,ULK2,NLK,UNC13C,KSR1,PLCB1,ZNF536,TAF4A,TENM4,DLC1,ZDHHC21,PTPRA,ITPR2,RIPOR2,PDE4D,RDX,RP1,STXBP1,ERC1,RALA,IL1RAPL2,BCL2,PRDM16,ALDH1A2,ARHGAP26,FBN1,LRFN2,CDH8,CHRNA7,DCDC1,GPR158,ROBO2,RIMS1,PIK3C3,TENM3,GABRB3,ZEB1,AKR1C3,RARB,FGD4,SPRED1,ENPEP,MYO1E,PLPPR1,MINAR1,CD42EP3,RIMS2,ALK,AUTS2,ADGRE1,MCTP1,PJA2,BABAM2,SV2C,ERBIN,RHPN2,RIN2,ANO6,CACNG2,DLGAP1,MLLT3,GPC6,CNTNAP2,MAP3K9,APC,HHLA2,TSHZ3,PLPPR5,DSCAM,CRKL,ILDR2,ERG,ARHGAP24,TNIK,SLC4A10,PTPRJ,KDM4C,DOCK10,EGFR,RFX3,DENND1A,USP14,ANGPT1,MACF1,CTNNA3,PRKACB,RGS3,NCOR1,RNF220,DOCK2,NEDD4,MAML2,SCAI,CRB1,BTBD9,FAM83F,SGMS1,GRIK3,CHSY1,ATP2B2,NTRK3,RXFP1,C5,PDE1C,ZFAND6,DKK2,FLT1,RABEP1,MAPKBP1,GABRB1,DGKI,INVS,EDAR,GRIA1,NEO1,CNTN6,SLC39A12,SLC8A3,TOM1L2,PRKD1,TPTE2,PAK1,GMDS,EPHA7,CTNNAL1,CHRM3,RALGPS1,SPEN,RAPGEF2,PELI2,LRP2,ADGRB3,RUNX2,FGF12,GABRA6,TAOK3,ONECUT1,CPEB4,TMEM38B,PRICKLE2,TAF4A,BTBD11,PTPRN2,SYN2,CCL28,PATJ,GRM7,RPTOR,TMEM117,GHR,COL4A2,RALGAP1,RAPGEF5,PPP1R12B,TRPM1,ADAM10,IL1R1,APBB2,APP,RPS6KA2,CACNA1C,CACNB2,DCLK1,STAU2,GABRG2,DOCK8,MAPRE2,USP18,SEMA5A,SYT1,ARHGAP44,NTF3,ACER2,NDUFAF2,CD2AP,AURKA,ST18,PYGO1,SLC8A1,HERPUD2,PTPRR,TAF4A,ABCG8,KANK1,KCNE4,MAP4K4,BMPR1B,FMN2,PCSK6,AKAP6,HOMER2,ARNT,RAB8B,PAK3,RFTN1,PDE1A,KCNK10,LARP1,ITPKB,RGS20,PDE10A,RAP1GDS1,HHAT,KICS2,ERC2,NBN,SYN3,IFT57,INTS7,PRKCZ,BTLA,GRB10,MSH6,ARHGAP32,RGS9,HECW1,DEFA3,DUSP22,SV2B,YAP1,PPM1L,SHC4,MAPK1,MGAT5,CADPS2,HRH2,ALCAM,PLG,PDGFD,SYT10,ZNRF3,PPP1R1C,ITGBL1,ARHGEF17,NRG3,UBE20,NCAM1,GFRA1,SLC16A1,STK38,PTPN13,CHN1,HRH4,SORCS3,GLP2R,PAFAH1B1,ATF6,EFEMP1,TM7SF3,ITGB8,TLK1,NF2,CNKSR2,GRIK4,HIVEP1,CORIN,CTNNA1,PPP1R9A,MOB3B,BIRC6,AKAP9,KLF15,RASGRF2,PPARA,ERMP1,RGL1,SYNJ1,NR5A2,ADAMTS3,TIAM1,ARAP2,GRM1,PTPRK,ARHGEF12,GABRG1,PAK5,TRERF1,PCDH11Y,PPP2R5E,PLA2R1,SEMA3C,DAPK1,SLC24A4,SEC14L1,TMEM108,STK32B,MAGI1,ALPK2,SCN2A,RIC8B,SORCS1,AMPH,CPE,EVC2,IL34,ANK2,ADGRV1,MELK,RYR2,BBS2,WNT9B,OR4F6,NKG7,SEMA6D,DUSP16,SMARCA4,CDH11,USP8,PARD3,MAPKAP1,PIAS1,SPG21,BLK,TNR,GRM8,DST,CXADR,DOCK4,MBD5,ATRX,NUAK1,PTPRT,ELAVL4,ABL1,PTPN12,HDAC4,SLC1A1,PRKAA1,GAS2,KCNH1,ITGB3BP,RIMBP2,APBB1IP,EIPR1,APLF,NFAT5,MAST4,GUCY1A2,RAP1A,MYO10,GPC5,CAMK4,INPP5A,FGF10,ZC3HAV1,GRID2,LATS2,NRG1,GSGL1,ASPM,AP3B1,DENND2B,RASGRF1,MUSK,ZNF675,GNG7,SH3GL3,PRKCE,NXN,WNK2,ESRRG,DGKB,USP33,DENND4C,FBN2,CD44,RGS12,PTPRO,EGF,ABCC9,P2RX6,TRIO,PDE3A,EXT1,NSMAF,LN</p> |



|  |  |  |                                                                                                                                                                                                                                                                                                                                                                                                                                                                                                                                                                                                                                                                                                                                                                                                                                                                                                                                                                                                                                                                                                                                                                                                                                                                                                                                                                                                                                                                                                                                                                                                                                                                                                                                                                                                                                                                                                                                                                                                                                                                                                                                                                                                                                                                                                                                                                                                                                                                                                                                                                                                                                                                                                                                                                                                                                                                                                                                                                                                                                                                                                                                                                                                                                                                                                                                                                                                                                                                                                                                                                                                                                                                                                                                                                                                                                                                                                                                                                                                                          |
|--|--|--|--------------------------------------------------------------------------------------------------------------------------------------------------------------------------------------------------------------------------------------------------------------------------------------------------------------------------------------------------------------------------------------------------------------------------------------------------------------------------------------------------------------------------------------------------------------------------------------------------------------------------------------------------------------------------------------------------------------------------------------------------------------------------------------------------------------------------------------------------------------------------------------------------------------------------------------------------------------------------------------------------------------------------------------------------------------------------------------------------------------------------------------------------------------------------------------------------------------------------------------------------------------------------------------------------------------------------------------------------------------------------------------------------------------------------------------------------------------------------------------------------------------------------------------------------------------------------------------------------------------------------------------------------------------------------------------------------------------------------------------------------------------------------------------------------------------------------------------------------------------------------------------------------------------------------------------------------------------------------------------------------------------------------------------------------------------------------------------------------------------------------------------------------------------------------------------------------------------------------------------------------------------------------------------------------------------------------------------------------------------------------------------------------------------------------------------------------------------------------------------------------------------------------------------------------------------------------------------------------------------------------------------------------------------------------------------------------------------------------------------------------------------------------------------------------------------------------------------------------------------------------------------------------------------------------------------------------------------------------------------------------------------------------------------------------------------------------------------------------------------------------------------------------------------------------------------------------------------------------------------------------------------------------------------------------------------------------------------------------------------------------------------------------------------------------------------------------------------------------------------------------------------------------------------------------------------------------------------------------------------------------------------------------------------------------------------------------------------------------------------------------------------------------------------------------------------------------------------------------------------------------------------------------------------------------------------------------------------------------------------------------------------------------|
|  |  |  | <p> PEP, LIMD1, SPRED2, RPS6KA3, CTNND2, SCG5, PTPN2, TRIM5, PLXNA2, MCF2L, OR4F15, ATXN3, HTR2C, RIC3, CLEC16A, ARHGEF7, LTBP1, STK38L, ZFYVE9, OPRM1, ABCC4, HTR2A, PLCXD3, FANCA, INPP4B, KREMEN1, STAC, SEMA3E, MARK2, GCSAML, FHL2, ADGRA3, CNIH3, PUM1, TMOD2, MSH2, GNAL, EPHA6, ANKRD17, APBA2, SH3KBP1, RELL1, HIPK3, EPN2, KCND2, EVC, GRK3, KNDC1, SPSB4, CLSPN, NOS2, MOSMO, GFRA2, TMEM116, RBBP8, MDFIC, ADAM12, MYLK2, ANK3, HMGA2, CCND3, DOCK5, ECE1, STK32A, CREM, MBP, PLCE1, TGFA, IL17RA, HIP1, CRIM1, PRR5L, CAPN5, VAV1, LDLRAD4, NPHP4, PACSIN2, CNTN1, IQSEC1, SNX3, CACNA1I, BRCA2, DISC1, DNER, BLM, ASB7, WDPCP, NRK, SEMA3A, MAGI3, ADCY10, PSG8, STRN, OR9Q1, BMP2, RC3H2, UNC5D, PSG9, CDC42BPB, SOGA1, SCN11A, VRK1, GNAI1, RALGAPA2, RANBP9, MYRIP, TTR, RIN3, BMP2K, TMEM161A, SEMA3D, NETO2, PDE6C, CABIN1, LEMD3, RELN, ARHGAP42, HMGB1, GNAQ, FGF9, NFATC2, SH3BP5, POLR2M, ZNF106, MYOM1, TRAF3, UNC13B, TTC21B, DSTYK, UIMC1, DOCK1, RAP1GAP, SRGAP2, DRAXIN, ATF1, CCDC186, SLAMF1, FAM83B, GLI3, CGAS, SMARCC1, SNX6, GABRR2, SMOC2, PCP4, CNKSR3, CASP5, GRIK2, IDE, WDR12, MCTP2, CUL1, PSD3, GAREM1, LAMC1, NEK10, FARP1, MOB1B, ATF2, CYLD, BBS4, MAPK8IP1, MX1, PSG6, GABBR2, ITGA9, CFTR, KPNA1, UBASH3A, RGM, NEU3, KITLG, ZZEF1, CAMTA1, UBR1, DCC, CHRM5, MAP4K3, SLC30A10, RCAN1, RORB, DAB1, RB1CC1, AKAP10, PTPRE, PRKN, MTMR2, TBX20, DLGAP2, AFAP1, MAPK10, NGEF, GRIN2A, ARID5B, WSB1, LALBA, PRKCH, PKP1, HUNK, TG, IL6R, ALS2, RACGAP1, NLRC5, OR51E1, MKNK1, DOCK9, SNX25, KCNQ3, SHISA9, PDE6A, COPS8, SCN10A, SHANK2, USP7, VAV3, KCND3, MESD, SOX30, MOK, KIR2DL4, ARHGEF28, RALB, ADGRG6, ROCK1, LYN, VCAM1, SEL1L, ARHGAP28, ARHGAP31, EIF2B3, SLC44A2, SLC15A2, DTX1, TENM2, OVOL2, ZBTB33, ADA2, NTN1, PLCB4, DPYSL5, RRGD, CRACR2A, RNF152, OTUD7A, INSR, CUL5, OR7A17, BMF, YTHDF3, TFF1, DEDD2, NEK6, GRID1, COLQ, NMU, ARFGEF1, GAST, SNAI2, ASH1L, IGHV3-74, BID, SIAH2, RPH3A, ABCA4, TRABD2B, UFD1, RXRG, ERN2, GABRG3, MBTPS2, FLNB, TIAL1, TOM1, PLPP4, NREP, ZDHHC17, CARD10, RALGPS2, JCAD, OR4K2, SAMHD1, IFT81, ENPP1, RASGRP1, IGSF11, NDRG2, CSNK2A1, BMP5, CSF1, GHRH, HDGFL3, BCL2L1, HCN1, PRKG1, LAMA3, ASB4, GRIN2B, GRB14, GPR156, IGHV2-70D, DHRS3, SMAD5, CELF4, OR4C46, FOXN3, PRAME, TNN, PSAP, MED1, CDC14B, PCNT, IL33, GPRC5C, ROR2, KL, RASGEF1C, BANK1, FAT1, IL10, OR1L6, SFPQ, CLSTN2, PTH, SOSTDC1, PRKAA2, CSF2RB, DIRAS2, NDC80, ABHD2, ITPRIP, PLA2G4A, RAB12, IQGAP1, RPS12, CAMLG, TEAD1, SREBF2, YBX3, AIMP1, THNSL2, FYB2, NRXN1, PCID2, HIPK1, DGKK, CD70, CIBAR1, PBLD, FICD, PEG10, NET1, SIPA1L2, TWIST1, AKT3, ALKAL2, JAK2, RPF2, FSTL1, SVEP1, MADD, HCRTR1, CELSR2, CREBBP, TNKS, GORAB, UFL1, NFKBIA, PRKCB, OR2T3, ABCC8, ANXA4, CACNA1E, ZC3H15, ANP32A, BRD4, NEDD9, OLFM4, NRBP1, ITGA6, ATP2B1, GAP43, GRIP1, IGHV10R15-9, ADGRE3, ADCY9, PPP1R17, CNIH1, MAST2, ERLIN2, OTOP1, CIDEA, ARFGEF3, EXT2, EXOC1, SLC6A1, GID8, STAT1, BRMS1L, NDFIP2, NR2C1, MAP2K6, CMTM7, DGKG, ABI1, CCBE1, PARK7, ADAMTS18, MAPK8, ITGA4, FBXL17, ADCYAP1R1, NCAPG2, RAPGEF4, OR6C75, ASB2, MYOCD, CYFIP2, EFHB, OR13C9, MEF2C, ADGRB1, RXRA, WNT7A, RBPMS2, MAP3K5, NDFIP1, MAP3K4, S100B, ATP6V1C2, C16ORF72, PKN2, OR10H2, PDE2A, RAB38, LRRC2, SDCBP, JPT2, SPPL2B, WWOX, PASK, NCK1, FGR, CDCA8, PPP2R3A, DNMBP, CXCL2, SNAP29, IFNAR1, GNG12, EPHA4, CYTH4, GABRA5, MECOM, NTRK2, IL1RAPL1, WNT2B, COLEC12, POSTN, CD101, SHISA6, IL17RD, FBXO31, AKAP11, GRIK1, PRKAB1, DTHD1, MVB12B, PTK2, MARK4, CDH5, RCAN2, ANKRD6, SCGN, NFKBID, ARHGAP12, CLDN18, FEZ2, INIP, LAMB1, APIP, CYFIP1, UBE3A, PCDH8, SEMA4D, PITPNC1, MC2R, FAT4, IMPA2, WNT5B, RASGEF1B, AMFR, NENF, PTGFR, OR4L1, ICA1, PLCZ1, NOS1AP, FCRLA, DIDO1, TPTE, SORBS2, CNKSR1, CCDC88A, GPR55, NSUN2, CDC45, OR11G2, BICD1, TNFSF11, FYN, BUB1, PPM1F, ADGRL2, ARL13B, SDE2, RBMS3, SCN8A, HDAC2, SH2D3C, DOCK3, DOK5, ZFYVE28, MAPK9, APELA, ROR1, FUT8, TET1, ASB3, CDH2, ITGA8, FBXL20, NTN4, RAD9A, PHLPP1, GPR137B, EPHB1, RP1 </p> |
|--|--|--|--------------------------------------------------------------------------------------------------------------------------------------------------------------------------------------------------------------------------------------------------------------------------------------------------------------------------------------------------------------------------------------------------------------------------------------------------------------------------------------------------------------------------------------------------------------------------------------------------------------------------------------------------------------------------------------------------------------------------------------------------------------------------------------------------------------------------------------------------------------------------------------------------------------------------------------------------------------------------------------------------------------------------------------------------------------------------------------------------------------------------------------------------------------------------------------------------------------------------------------------------------------------------------------------------------------------------------------------------------------------------------------------------------------------------------------------------------------------------------------------------------------------------------------------------------------------------------------------------------------------------------------------------------------------------------------------------------------------------------------------------------------------------------------------------------------------------------------------------------------------------------------------------------------------------------------------------------------------------------------------------------------------------------------------------------------------------------------------------------------------------------------------------------------------------------------------------------------------------------------------------------------------------------------------------------------------------------------------------------------------------------------------------------------------------------------------------------------------------------------------------------------------------------------------------------------------------------------------------------------------------------------------------------------------------------------------------------------------------------------------------------------------------------------------------------------------------------------------------------------------------------------------------------------------------------------------------------------------------------------------------------------------------------------------------------------------------------------------------------------------------------------------------------------------------------------------------------------------------------------------------------------------------------------------------------------------------------------------------------------------------------------------------------------------------------------------------------------------------------------------------------------------------------------------------------------------------------------------------------------------------------------------------------------------------------------------------------------------------------------------------------------------------------------------------------------------------------------------------------------------------------------------------------------------------------------------------------------------------------------------------------------------------|

|            |                                   |                       |                                                                                                                                                                                                                                                                                                                                                                                                                                                                                                                                                                                                                                                                                                                                                                                                                                                                                                                                                                                                                                                                                                                                                                                                                                                                                                                                                                                                                                                                                                                                                                                                                                                                                                                                                                                                                                                                                                                                                                                                                                                                                                                                                                                                                                                                                                                                                                                                                                                                                                                                                                                                                                                                                                                                                                                                                                                                                                                                                                                                                                                                                                                                   |
|------------|-----------------------------------|-----------------------|-----------------------------------------------------------------------------------------------------------------------------------------------------------------------------------------------------------------------------------------------------------------------------------------------------------------------------------------------------------------------------------------------------------------------------------------------------------------------------------------------------------------------------------------------------------------------------------------------------------------------------------------------------------------------------------------------------------------------------------------------------------------------------------------------------------------------------------------------------------------------------------------------------------------------------------------------------------------------------------------------------------------------------------------------------------------------------------------------------------------------------------------------------------------------------------------------------------------------------------------------------------------------------------------------------------------------------------------------------------------------------------------------------------------------------------------------------------------------------------------------------------------------------------------------------------------------------------------------------------------------------------------------------------------------------------------------------------------------------------------------------------------------------------------------------------------------------------------------------------------------------------------------------------------------------------------------------------------------------------------------------------------------------------------------------------------------------------------------------------------------------------------------------------------------------------------------------------------------------------------------------------------------------------------------------------------------------------------------------------------------------------------------------------------------------------------------------------------------------------------------------------------------------------------------------------------------------------------------------------------------------------------------------------------------------------------------------------------------------------------------------------------------------------------------------------------------------------------------------------------------------------------------------------------------------------------------------------------------------------------------------------------------------------------------------------------------------------------------------------------------------------|
|            |                                   |                       | <p>L1, GRM5, RAI14, RPS6KA5, TBC1D1, LRRC69, PTPRG, PID1, NRP1, FCHSD2, PRKCA, FAIM, SAMD12, FHIT, ITGA1, RNF138, RC3H1, P<br/>OR, MCC, BCR, NRXN3, ELMO1, RGS6, RERG, KIF16B, SNRK, ELP2, F<br/>BLN1, STK36, NSG2, B9D1, RRAS2, GNA14, BMPER, PRDM15, SRGAP<br/>3, MITF, EPHB2, CSNK1G1, CD38, EYA4, CDK14, MET, SPPL3, DLG2<br/>, CDH17, CDH13, STXBP4, CACNG3, MAGI2, PRDM11, FLRT2, KALRN<br/>, SLC1A2, GNAS, LAMA1, MFHAS1, ATRNL1, TIAM2, BMP7, DLG5, GA<br/>PVD1, GABRA2, OR2T2, ZMYND11, TMEM25, GRM3, ADGRF5, OR4N2,<br/>PDGFC, PPP1R13B, ABL2, EYA1, SLIT2, EXOC4, CNOT7, KCTD8, PL<br/>CL1, ERBB4, IL20RB, FAM3B, TRHDE, ROBO1, IRAG1, NUF2, PRKCQ<br/>, NDRG1, SORCS2, SIPA1L3, TRDN, NLGN1, NOS1, SLC6A3, ASIC2,<br/>EFNA5, ARHGEF11, SLIT3, DTNA, ESR1, MYO9B, NTNG1, CACNA2D1<br/>, NYAP2, IGLC3, IQCJ-<br/>SCHIP1, ADGRG7, SKAP2, PRLR, AGO3, HTT, PIK3R3, FER, EYA2, C<br/>CR2, STARD13, CHFR, EPS8, SEMA4B, IGHV10R21-<br/>1, HRH1, GRIA4, ROCK2, RORA, IL16, DMRT1, PPP1CB, RGS8, PDK1<br/>, HERPUD1, COL4A3, RGS7, KIF7, GNG2, FSTL4, BARD1, STK3, DEP<br/>TOR, ZNF423, RSU1, CADPS, APCDD1, IGF1R, PRKAG2, GLI2, THRB<br/>, AKAP13, DNML1</p>                                                                                                                                                                                                                                                                                                                                                                                                                                                                                                                                                                                                                                                                                                                                                                                                                                                                                                                                                                                                                                                                                                                                                                                                                                                                                                                                                                                                                                                                                                                                                                                                                                                                                                                                                                                                                                                                                                                                                                |
| GO:0035556 | intracellular signal transduction | 8.181691505147024e-21 | <p>NOTCH2, BCAR3, MTOR, SGCD, WWC1, GARNL3, MYO9A, NLK, KSR1, P<br/>LCB1, DLC1, ITPR2, RIPOR2, PDE4D, RDX, RP1, ERC1, RALA, BCL2<br/>, ARHGAP26, CHRNA7, DCDC1, PIK3C3, AKR1C3, FGD4, SPRED1, MI<br/>NAR1, CDC42EP3, ALK, AUTS2, MCTP1, PJA2, BABAM2, ERBIN, RIN<br/>2, MAP3K9, APC, CRKL, ARHGAP24, TNIK, PTPRJ, DOCK10, EGFR, D<br/>ENND1A, ANGPT1, PRKACB, NCOR1, DOCK2, NEDD4, SCAI, SGMS1, N<br/>TRK3, ZFAND6, FLT1, MAPKBP1, DGKI, EDAR, PRKD1, TPTE2, PAK1<br/>, EPHA7, CTNNAL1, CHRM3, RALGPS1, RAPGEF2, PELI2, LRP2, FGF<br/>12, TAOK3, TMEM38B, PATJ, RPTOR, TMEM117, GHR, RALGAPA1, RA<br/>PGEF5, APBB2, APP, RPS6KA2, CACNA1C, DCLK1, DOCK8, MAPRE2,<br/>SEMA5A, ARHGAP44, NTF3, ACER2, CD2AP, AURKA, SLC8A1, PTPRR<br/>, KANK1, MAP4K4, FMN2, AKAP6, HOMER2, PAK3, LARP1, ITPKB, PD<br/>E10A, RAP1GDS1, KICS2, NBN, INTS7, PRKCZ, GRB10, MSH6, ARHG<br/>AP32, RGS9, DUSP22, YAP1, PPM1L, SHC4, MAPK1, PDGFD, PPP1R1<br/>C, ARHGEF17, NRG3, STK38, PTPN13, CHN1, HRH4, PAFAH1B1, TLK<br/>1, NF2, CNKSR2, PPP1R9A, MOB3B, RASGRF2, PPARA, RGL1, NR5A2<br/>, TIAM1, GRM1, ARHGEF12, PAK5, PLA2R1, DAPK1, SLC24A4, SEC1<br/>4L1, STK32B, SCN2A, IL34, ANK2, ADGRV1, MELK, RYR2, DUSP16,<br/>USP8, MAPKAP1, BLK, DOCK4, ATRX, NUA1, ABL1, HDAC4, PRKAA1<br/>, KCNH1, NFAT5, MAST4, GUCY1A2, RAP1A, CAMK4, INPP5A, FGF10<br/>, ZC3HAV1, LATS2, NRG1, DENND2B, RASGRF1, ZNF675, PRKCE, WN<br/>K2, DGKB, DENND4C, CD44, EGF, TRIO, PDE3A, LIMD1, SPRED2, RP<br/>S6KA3, PTPN2, TRIM5, MCF2L, HTR2C, CLEC16A, ARHGEF7, STK38<br/>L, OPRM1, HTR2A, SEMA3E, MARK2, FHL2, PUM1, MSH2, ANKRD17, R<br/>ELL1, HIPK3, KNDC1, SPSB4, CLSPN, NOS2, RBBP8, MDFC, HMGA2<br/>, DOCK5, STK32A, MBP, PLCE1, TGFA, HIP1, PRR5L, VAV1, IQSEC1<br/>, BRCA2, DISC1, BLM, ASB7, NRK, SEMA3A, MAGI3, ADCY10, BMP2,<br/>RC3H2, GNAI1, RALGAPA2, RANBP9, TMEM161A, LEMD3, RELN, ARH<br/>GAP42, HMGB1, NFATC2, SH3BP5, POLR2M, MYOM1, TRAF3, DSTYK,<br/>UIMC1, DOCK1, RAP1GAP, SRGAP2, ATF1, SLAMF1, CGAS, CNKSR3,<br/>MCTP2, CUL1, PSD3, GAREM1, NEK10, MOB1B, ATF2, CYLD, MAPK8I<br/>P1, KITLG, CAMTA1, UBR1, MAP4K3, SLC30A10, RCAN1, DAB1, RB1<br/>CC1, PRKN, MAPK10, NGEF, GRIN2A, WSB1, PRKCH, HUNK, IL6R, AV<br/>S2, RACGAP1, NLRC5, MKNK1, DOCK9, COPS8, SHANK2, USP7, VAV3<br/>, MOK, ARHGEF28, RALB, ADGRG6, ROCK1, LYN, VCAM1, ARHGAP28,<br/>ARHGAP31, SLC44A2, SLC15A2, ZBTB33, NTN1, PLCB4, RRAGD, CR<br/>ACR2A, RNF152, OTUD7A, INSR, CUL5, DEDD2, NEK6, ARFGEF1, SN<br/>AI2, ASH1L, BID, SIAH2, UFD1, ERN2, TIAL1, ZDHHC17, CARD10,<br/>RALGPS2, JCAD, RASGRP1, NDRG2, CSF1, BCL2L1, PRKG1, ASB4, G<br/>RIN2B, FOXN3, CDC14B, ROR2, KL, RASGEF1C, BANK1, SFPQ, PTH,<br/>PRKAA2, NDC80, RAB12, IQGAP1, TEAD1, YBX3, NRXN1, PCID2, HI<br/>PK1, DGKK, NET1, SIPA1L2, TWIST1, AKT3, ALKAL2, JAK2, RPF2,<br/>MADD, HCTR1, UFL1, NFKBIA, PRKCB, ANP32A, BRD4, NRBP1, GRI<br/>P1, ADCY9, PPP1R17, MAST2, ARFGEF3, EXOC1, STAT1, NDFIP2, M<br/>AP2K6, DGKG, PARK7, MAPK8, ADCYAP1R1, RAPGEF4, ASB2, EFHB,<br/>MEF2C, WNT7A, MAP3K5, NDFIP1, MAP3K4, S100B, C16ORF72, PKN<br/>2, PDE2A, RAB38, SDCBP, JPT2, WWOX, PASK, NCK1, FGR, CDCA8, D</p> |

|            |                         |                        |                                                                                                                                                                                                                                                                                                                                                                                                                                                                                                                                                                                                                                                                                                                                                                                                                                                                                                                                                                                                                                                                                                                                                                                                                                                                                                                                                                                                                                                                                                                                                                                                                                                                                                                                                                                                                                                                                                                                                                                                                                                                                                                                                                                                                                                                                                                                                                                                                                                                                                                                                                                                                                                                                                                |
|------------|-------------------------|------------------------|----------------------------------------------------------------------------------------------------------------------------------------------------------------------------------------------------------------------------------------------------------------------------------------------------------------------------------------------------------------------------------------------------------------------------------------------------------------------------------------------------------------------------------------------------------------------------------------------------------------------------------------------------------------------------------------------------------------------------------------------------------------------------------------------------------------------------------------------------------------------------------------------------------------------------------------------------------------------------------------------------------------------------------------------------------------------------------------------------------------------------------------------------------------------------------------------------------------------------------------------------------------------------------------------------------------------------------------------------------------------------------------------------------------------------------------------------------------------------------------------------------------------------------------------------------------------------------------------------------------------------------------------------------------------------------------------------------------------------------------------------------------------------------------------------------------------------------------------------------------------------------------------------------------------------------------------------------------------------------------------------------------------------------------------------------------------------------------------------------------------------------------------------------------------------------------------------------------------------------------------------------------------------------------------------------------------------------------------------------------------------------------------------------------------------------------------------------------------------------------------------------------------------------------------------------------------------------------------------------------------------------------------------------------------------------------------------------------|
|            |                         |                        | <p>NMBP,EPHA4,CYTH4,MECOM,NTRK2,FBXO31,AKAP11,PTK2,MAR K4,RCAN2,ANKRD6,ARHGAP12,INIP,APIP,CYFIP1,UBE3A,SEM A4D,FAT4,RASGEF1B,NENF,PTGFR,PLCZ1,NOS1AP,TPTE,CNKSR1,CCDC88A,GPR55,NSUN2,CDC45,TNFSF11,FYN,BUB1,PPM1F,SDE2,SH2D3C,DOCK3,DOK5,MAPK9,APELA,ROR1,ASB3,CDH2,RAD9A,PHLPP1,GPR137B,EPHB1,RP1L1,GRM5,RAI14,RPS6KA5,NRP1,PRKCA,FAIM,FHIT,ITGA1,RC3H1,BCR,ELMO1,RGS6,RE RG,SNRK,FBLN1,STK36,RRAS2,BMPER,PRDM15,SRGAP3,EPHB2,MET,SPPL3,CDH13,MAGI2,PRDM11,KALRN,GNAS,MFHAS1,TIAM2,BMP7,DLG5,ZMYND11,PDGFC,PPP1R13B,ABL2,SLIT2,PLCL1,ERBB4,ROBO1,IRAG1,NUF2,PRKCQ,NDRG1,SIPA1L3,NLGN1,NOS1,ARHGEF11,ESR1,MYO9B,NYAP2,IQDJ-SCHIP1,AGO3,HTT,PIK3R3,FER,CCR2,STARD13,CHFR,EPS8,HRH1,ROCK2,RORA,DMRT1,PPP1CB,PKD1,HERPUD1,RGS7,BARD1,STK3,DEPTOR,IGF1R,PRKAG2,AKAP13,DNM1L</p>                                                                                                                                                                                                                                                                                                                                                                                                                                                                                                                                                                                                                                                                                                                                                                                                                                                                                                                                                                                                                                                                                                                                                                                                                                                                                                                                                                                                                                                                                                                                                                                                                                                                                                                                                                                                                                                                                                                                    |
| GO:0023051 | regulation of signaling | 1.7672837265435958e-20 | <p>NOTCH2,BCAR3,MTOR,CNTN4,NSG1,WWC1,GARNL3,PTPRD,SLC24A2,LRRC4C,MYO9A,NLK,UNC13C,KSR1,PLCB1,ZNF536,DLC1,PTPRA,RIPOR2,PDE4D,RDX,STXBP1,ERC1,BCL2,PRDM16,ARHGAP26,FBN1,LRFN2,CHRNA7,ROBO2,RIMS1,ZEB1,AKRIC3,FGD4,SPRED1,MINAR1,RIMS2,ALK,AUTS2,MCTP1,PJA2,BABAM2,ERBIN,CACNG2,DLGAP1,MLLT3,GPC6,APC,TSHZ3,CRKL,ARHGAP24,TNII,SLC4A10,PTPRJ,KDM4C,EGFR,RFK3,DENND1A,ANGPT1,MACF1,PRKACB,RGS3,NCOR1,RNF220,DOCK2,NEDD4,SCAI,BTBD9,SGMS1,GRIK3,CHSY1,ATP2B2,NTRK3,ZFAND6,DKK2,FLT1,MAPKBP1,DGKI,INVS,EDAR,GRIA1,NEO1,CNTN6,SLC8A3,PRKD1,TPTE2,PAK1,EPHA7,RALGPS1,RAPGEF2,PELI2,LRP2,RUNX2,FGF12,TACOK3,ONECUT1,TAF4A,GRM7,RPTOR,GHR,RALGAP1,ADAM10,IL1R1,APP,CACNB2,STAU2,DOCK8,MAPRE2,USP18,SEMA5A,SYT1,ARHGAP44,NTF3,NDUFAF2,CD2AP,AURKA,SLC8A1,PTPRR,KANK1,MAP4K4,BMPR1B,PCSK6,AKAP6,HOMER2,ARNT,RAB8B,PAK3,ITPKB,RGS20,PDE10A,RAP1GDS1,KICS2,ERC2,SYN3,PRKCZ,GRB10,ARHGAP32,RGS9,HECW1,DUSP22,YAP1,MAPK1,MGAT5,PDGFD,ZNRF3,ARHGEF17,NRG3,UBE20,NCAM1,SLC16A1,STK38,PTPN13,CHN1,HRH4,SORCS3,PAFAH1B1,ATF6,TM7SF3,ITGB8,NF2,CNKSR2,GRIK4,CORIN,CTNNA1,PPP1R9A,MOB3B,BIRC6,AKAP9,KLF15,RASGRF2,PPARA,ADAMTS3,TIAM1,GRM1,ARHGEF12,PAK5,PCDH11Y,PLA2R1,DAPK1,SLC24A4,SEC14L1,TMEM108,ALPK2,RIC8B,IL34,ANK2,ADGRV1,RYR2,DUSP16,SMARCA4,CDH11,USP8,MAPKAP1,BLK,TNR,GRM8,MBD5,NUAK1,PTPRT,ELAVL4,ABL1,PTPN12,SLC1A1,PRKAA1,GAS2,EIPR1,NFAT5,GUCY1A2,RAP1A,GPC5,FGF10,ZC3HAV1,GRID2,LATS2,NRG1,GSGL1,ASPM,DENND2B,RASGRF1,ZNF675,GNG7,PARKC,NXN,WNK2,DGKB,USP33,DENND4C,FBN2,CD44,RGS12,PTPRO,EGF,TRIO,PDE3A,LIMD1,SPRED2,CTNND2,SCG5,PTPN2,TRIM5,MCF2L,HTR2C,CLEC16A,ARHGEF7,LTBP1,OPRM1,HTR2A,FANCA,KREMEN1,SEMA3E,GCSAML,FHL2,CNIH3,PUM1,TMOD2,ANKRD17,APBA2,RELL1,HIPK3,EPN2,EVC,GRK3,NOS2,MOSMO,MDFIC,CND3,ECE1,PLCE1,TGFA,HIP1,CRIM1,PRR5L,VAV1,LDLRAD4,NPHP4,PACSIN2,IQSEC1,SNX3,BRCA2,DISC1,NRK,SEMA3A,MAGI3,BMP2,RC3H2,GNAI1,RALGAP2,RANBP9,MYRIP,BMP2K,TMEM161A,NETO2,LEMD3,RELN,ARHGAP42,HMGB1,GNAQ,FGF9,TRAF3,UNC13B,TTC21B,DSTYK,RAP1GAP,SRGAP2,DRAXIN,SLAMF1,GLI3,SNX6,SMOC2,CNKSR3,GRIK2,MCTP2,PSD3,GAREM1,LAMC1,NEK10,CYLD,MAPK8IP1,CFTR,KPNA1,UBASH3A,NEU3,KITLG,ZZEF1,CAMTA1,UBR1,DCC,SLC30A10,RCAN1,DAB1,RB1CC1,PTPRE,PRKN,MTMR2,TBX20,DLGAP2,AFAP1,NGEF,GRIN2A,PRKCH,IL6R,ALS2,RACGAP1,NLRC5,SNX25,SHISA9,SHANK2,USP7,VAV3,SOX30,ARHGEF28,ROCK1,LYN,ARHGAP28,ARHGAP31,SLC44A2,SLC15A2,DTX1,OVOL2,PLCB4,RRAGD,CRACR2A,RNF152,OTUD7A,INSR,YTHDF3,DEDD2,NEK6,GRID1,NMU,ARFGEF1,SNAI2,ASH1L,BID,SIAH2,TRABD2B,UFD1,ERN2,TIAL1,NREP,ZDHHC17,RALGPS2,JCAD,SAMHD1,IFT81,ENPP1,RASGRP1,IGSF11,NDRG2,CSNK2A1,BMP5,CSF1,GHRH,BCL2L1,HCN1,GRIN2B,GRB14,DHRS3,CELF4,PRAME,TNN,MED1,ROR2,KL,BANK1,IL10,SFPQ,CLSTN2,PTH,SOSTDC1,PRKAA2,NDC80,ITPRIP,IQGAP1,RPS12,SREBF2,YBX3,AIMP1,NRXN1,PCID2,HIPK1,CIBAR1,P</p> |

|            |                                  |                        |                                                                                                                                                                                                                                                                                                                                                                                                                                                                                                                                                                                                                                                                                                                                                                                                                                                                                                                                                                                                                                                                                                                                                                                                                                                                                                                                                                                                                                                                                                                                                                                                                                                                                                                                                                                                                                                                                                                                                                                                                                                                                                                                                                                                                                                                                                                                                                                                                                                                                                                                  |
|------------|----------------------------------|------------------------|----------------------------------------------------------------------------------------------------------------------------------------------------------------------------------------------------------------------------------------------------------------------------------------------------------------------------------------------------------------------------------------------------------------------------------------------------------------------------------------------------------------------------------------------------------------------------------------------------------------------------------------------------------------------------------------------------------------------------------------------------------------------------------------------------------------------------------------------------------------------------------------------------------------------------------------------------------------------------------------------------------------------------------------------------------------------------------------------------------------------------------------------------------------------------------------------------------------------------------------------------------------------------------------------------------------------------------------------------------------------------------------------------------------------------------------------------------------------------------------------------------------------------------------------------------------------------------------------------------------------------------------------------------------------------------------------------------------------------------------------------------------------------------------------------------------------------------------------------------------------------------------------------------------------------------------------------------------------------------------------------------------------------------------------------------------------------------------------------------------------------------------------------------------------------------------------------------------------------------------------------------------------------------------------------------------------------------------------------------------------------------------------------------------------------------------------------------------------------------------------------------------------------------|
|            |                                  |                        | <p>BLD, FICD, PEG10, NET1, SIPA1L2, TWIST1, AKT3, ALKAL2, JAK2, RPF2, FSTL1, MADD, HCRTR1, CREBBP, TNKS, GORAB, UFL1, NFKB1A, PRKCB, ABCC8, BRD4, ITGA6, ATP2B1, OTOF1, CIDEA, ARFGEF3, SLC6A1, GID8, STAT1, BRMS1L, NDFIP2, NR2C1, MAP2K6, DGKG, CCBE1, PARK7, FBXL17, ADCYAP1R1, NCAPG2, MYOCD, CYFIP2, EFHB, MEF2C, ADGRB1, RXRA, WNT7A, RBPMS2, MAP3K5, NDFIP1, MAP3K4, S100B, ATP6V1C2, C16ORF72, PDE2A, SDCBP, JPT2, SPPL2B, WWOX, PASK, NCK1, FGR, CDCA8, PPP2R3A, DNMBP, EPHA4, CYTH4, MECOM, NTRK2, POSTN, SHISA6, IL17RD, GRIK1, MVB12B, PTK2, CDH5, ANKRD6, SCGN, ARHGAP12, LAMB1, APIP, CYFIP1, UBE3A, SEMA4D, WNT5B, AMFR, NENF, ICA1, NOS1AP, TPTE, CCDC88A, GPR55, BICD1, TNFSF11, FYN, RBMS3, HDAC2, DOCK3, DOK5, ZFYVE28, MAPK9, APELA, ROR1, TET1, CDH2, ITGA8, FBXL20, RAD9A, PHLPP1, GPR137B, EPHB1, GRM5, RAI14, TBC1D1, PID1, NRP1, PRKCA, FAIM, ITGA1, RC3H1, POR, MCC, BCR, NRXN3, RGS6, KIF16B, ELP2, FBLN1, STK36, BMPER, PRDM15, SRGAP3, EPHB2, CSNK1G1, CD38, EYA4, CDK14, MET, SPPL3, CDH13, STXBP4, CACNG3, MAGI2, PRDM11, KALRN, GNAS, LAMA1, MFHAS1, TIAM2, BMP7, DLG5, ZMYND11, TMEM25, GRM3, PDGFC, ABL2, EYA1, SLIT2, CNOT7, KCTD8, PLCL1, ERBB4, ROBO1, PRKCQ, SORCS2, SIPA1L3, NLGN1, EFNA5, ARHGEF11, SLIT3, ESR1, MYO9B, NTNG1, IQCJ-SCHIP1, PRLR, AGO3, HTT, FER, EYA2, CCR2, STARD13, EPS8, HRH1, ROCK2, RORA, DMRT1, RGS8, HERPUD1, RGS7, KIF7, FSTL4, BAR1, STK3, DEPTOR, ZNF423, APCDD1, IGF1R, GLI2, THRB, AKAP13, DNML</p>                                                                                                                                                                                                                                                                                                                                                                                                                                                                                                                                                                                                                                                                                                                                                                                                                                                                                                                                                                                                                                                         |
| GO:0010646 | regulation of cell communication | 2.1294156992853608e-20 | <p>NOTCH2, BCAR3, MTOR, CNTN4, NSG1, WWC1, GARNL3, PTPRD, SLC24A2, LRRC4C, MYO9A, NLK, UNC13C, KSR1, PLCB1, ZNF536, DLC1, PTPRA, RIPOR2, PDE4D, RDX, STXBP1, ERC1, BCL2, PRDM16, ARHGAP26, FBN1, LRFN2, CHRNA7, ROBO2, RIMS1, ZEB1, AKR1C3, FGD4, SPRED1, MINAR1, RIMS2, ALK, AUTS2, MCTP1, PJA2, BABAM2, ERBIN, CACNG2, DLGAP1, MLLT3, GPC6, APC, TSHZ3, CRKL, ARHGAP24, TNK1, SLC4A10, PTPRJ, KDM4C, EGFR, RFX3, DENND1A, ANGPT1, MACF1, PRKACB, RGS3, NCOR1, RNF220, DOCK2, NEDD4, SCAI, BTBD9, SGMS1, GRIK3, CHSY1, NTRK3, ZFAND6, DKK2, FLT1, MAPKBP1, DGKI, INVS, EDAR, GRIA1, NEO1, CNTN6, SLC8A3, PRKD1, TPTE2, PAK1, EPHA7, RALGPS1, RAPGEF2, PELI2, LRP2, RUNX2, FGF12, TAOK3, ONECUT1, TAFA4, GRM7, RPTOR, GHR, RALGAP1, ADAM10, IL1R1, APP, CACNB2, STAU2, DOCK8, MAPRE2, USP18, SEMA5A, SYT1, ARHGAP44, NTF3, NDUFAF2, CD2AP, AURKA, SLC8A1, PTPRR, KANK1, MAP4K4, BMPR1B, PCSK6, AKAP6, HOMER2, ARNT, RAB8B, PAK3, ITPKB, RGS20, PDE10A, RAP1GDS1, KICS2, ERC2, SYN3, PRKCZ, GRB10, ARHGAP32, RGS9, HECW1, DUSP22, YAP1, MAPK1, MGAT5, PDGFD, ZNR3, ARHGEF17, NRG3, UBE2O, NCAM1, SLC16A1, STK38, PTPN13, CHN1, HRH4, SORCS3, PAFAH1B1, ATF6, TM7SF3, ITGB8, NF2, CNKSR2, GRIK4, CTNNA1, PPP1R9A, MOB3B, BIRC6, AKAP9, KLF15, RASGRF2, PPARA, ADAMTS3, TIAM1, GRM1, ARHGEF12, PAK5, PCDH11Y, PLA2R1, DAPK1, SLC24A4, SEC14L1, TMEM108, ALPK2, RIC8B, IL34, ANK2, ADGRV1, RYR2, DUSP16, SMARCA4, CDH11, USP8, MAPKAP1, BLK, TNFR, GRM8, CXADR, MBD5, NUA1, PTPRT, ELAVL4, ABL1, PTPN12, SLC1A1, PRKAA1, GAS2, EIPR1, NFAT5, GUCY1A2, RAP1A, GPC5, FGF10, ZC3HAV1, GRID2, LATS2, NRG1, GSG1L, ASPM, DENND2B, RASGRF1, ZNF675, GNG7, PRKCE, NXN, WNK2, DGKB, USP33, DENND4C, FBN2, CD44, RGS12, PTPRO, EGF, TRIO, PDE3A, LIMD1, SPRED2, CTNND2, SCG5, PTPN2, TRIM5, MCF2L, HTR2C, CLEC16A, ARHGEF7, LTBP1, OPRM1, HTR2A, FANCA, KREMEN1, SEMA3E, GCSAML, FHL2, CNIH3, PUM1, TMOD2, ANKRD17, APBA2, RELL1, HIPK3, EPN2, EVC, GRK3, NOS2, MOSMO, MDFIC, ANK3, CCND3, PLCE1, TGFA, HIP1, CRIM1, PRR5L, VAV1, LDLRAD4, NPHP4, PACSIN2, IQSEC1, SNX3, BRCA2, DISC1, NRK, SEMA3A, MAGI3, BMP2, RC3H2, GNAI1, RALGAP2, RANBP9, MYRIP, BMP2K, TMEM161A, NETO2, LEMD3, RELN, ARHGAP42, HMGB1, GNAQ, FGF9, TRAF3, UNC13B, TTC21B, DSTYK, RAP1GAP, SRGAP2, DRAXIN, SLAMF1, GLI3, SNX6, SMOC2, CNKSR3, GRIK2, MCTP2, PSD3, GAREM1, LAMC1, NEK10, CYLD, MAPK8IP1, CFTR, KPNA1, UBASH3A, NEU3, KITLG, ZF1, CAMTA1, UBR1, DCC, SLC30A10, RCAN1, DAB1, RB1CC1, PTPRE, PRKN, MTMR2, TBX20, DLGAP2, AFAP1, NGEF, GRIN2A, PRKCH, IL6</p> |

|            |                                                       |                        |                                                                                                                                                                                                                                                                                                                                                                                                                                                                                                                                                                                                                                                                                                                                                                                                                                                                                                                                                                                                                                                                                                                                                                                                                                                                                                                                                                                                                                                                                                                                                                                                                                                                                                                                                                                                                                                                                                                                                                                                                                                                            |
|------------|-------------------------------------------------------|------------------------|----------------------------------------------------------------------------------------------------------------------------------------------------------------------------------------------------------------------------------------------------------------------------------------------------------------------------------------------------------------------------------------------------------------------------------------------------------------------------------------------------------------------------------------------------------------------------------------------------------------------------------------------------------------------------------------------------------------------------------------------------------------------------------------------------------------------------------------------------------------------------------------------------------------------------------------------------------------------------------------------------------------------------------------------------------------------------------------------------------------------------------------------------------------------------------------------------------------------------------------------------------------------------------------------------------------------------------------------------------------------------------------------------------------------------------------------------------------------------------------------------------------------------------------------------------------------------------------------------------------------------------------------------------------------------------------------------------------------------------------------------------------------------------------------------------------------------------------------------------------------------------------------------------------------------------------------------------------------------------------------------------------------------------------------------------------------------|
|            |                                                       |                        | <p>R, ALS2, RACGAP1, NLRC5, SNX25, SHISA9, SHANK2, USP7, VAV3, SOX30, ARHGEF28, ROCK1, LYN, ARHGAP28, ARHGAP31, SLC44A2, SLC15A2, DTX1, OVOL2, PLCB4, RRAGD, CRACR2A, RNF152, OTUD7A, INSR, YTHDF3, DEDD2, NEK6, GRID1, NMU, ARFGEF1, SNAI2, ASH1L, BID, SIAH2, TRABD2B, UFD1, ERN2, TIAL1, NREP, ZDHHC17, RALGPS2, JCAD, SAMHD1, IFT81, ENPP1, RASGRP1, IGSF11, NDRG2, CSNK2A1, BMP5, CSF1, GHRH, BCL2L1, HCN1, GRIN2B, GRB14, DHRS3, CELF4, PRAME, TNN, MED1, ROR2, KL, BANK1, IL10, SFPQ, CLSTN2, PTH, SOSTDC1, PRKAA2, NDC80, ITPRIP, IQGAP1, RPS12, SREBF2, YBX3, AIMP1, NRXN1, PCID2, HIPK1, CIBAR1, PBLD, FICD, PEG10, NET1, SIPA1L2, TWIST1, AKT3, ALKAL2, JAK2, RPF2, FSTL1, MADD, HCTR1, CREBBP, TNKS, GORAB, UFL1, NFKBIA, PRKCB, ABCC8, BRD4, ITGA6, OTOP1, CIDEA, ARFGEF3, SLC6A1, GID8, STAT1, BRMS1L, NDFIP2, NR2C1, MAP2K6, DGKG, CCBE1, PARK7, FBXL17, ADCYAP1R1, NCAPG2, MYOCD, CYFIP2, EFHB, MEF2C, ADGRB1, RXRA, WNT7A, RBPM2, MAP3K5, NDFIP1, MAP3K4, S100B, ATP6V1C2, C16ORF72, PDE2A, SDCBP, JPT2, SPPL2B, WWOX, PASK, NCK1, FGR, CDCA8, PPP2R3A, DNMBP, EPHA4, CYTH4, MECOM, NTRK2, POSTN, SHISA6, IL17RD, GRIK1, MVB12B, PTK2, CDH5, ANKRD6, SCGN, ARHGAP12, LAMB1, APIP, CYFIP1, UBE3A, SEMA4D, WNT5B, AMFR, NENF, ICA1, NOS1AP, TPTE, CCDC88A, GPR55, BICD1, TNFSF11, FYN, RBMS3, HDAC2, DOCK3, DOK5, ZFYVE28, MAPK9, APELA, ROR1, TET1, CDH2, ITGA8, FBXL20, RAD9A, PHLPP1, GPR137B, EPHB1, GRM5, RAI14, TBC1D1, PID1, NRP1, PRKCA, FAIM, ITGA1, RC3H1, POR, MCC, BCR, NRXN3, RGS6, ELP2, FBLN1, STK36, BMPER, PRDM15, SRGAP3, EPHB2, CSNK1G1, CD38, EYA4, CDK14, MET, SPPL3, CDH13, STXB4, CACNG3, MAGI2, PRDM11, KALRN, GNAS, LAMA1, MFHAS1, TIAM2, BMP7, DLG5, ZMYND11, TMEM25, GRM3, PDGFC, ABLL2, EYA1, SLIT2, CNOT7, KCTD8, PLCL1, ERBB4, ROBO1, PRKCQ, SORCS2, SIPA1L3, TRDN, NLGN1, EFNA5, ARHGEF11, SLIT3, ESR1, MYO9B, NTNG1, IQCJ, SCHIP1, PRLR, AGO3, HTT, FER, EYA2, CCR2, STARD13, EPS8, HRH1, ROCK2, RORA, DMRT1, RGS8, HERPUD1, RGS7, KIF7, FSTL4, BARDD1, STK3, DEPTOR, ZNF423, APCDD1, IGF1R, GLI2, THRB, AKAP13, DNMI1L</p> |
| GO:0048667 | cell morphogenesis involved in neuron differentiation | 2.7489804712494596e-20 | <p>NOTCH2, CNTN4, PTPRD, LRRC4C, ULK2, RIPOR2, STXB1, BCL2, CHRNA7, ROBO2, AUTS2, DSCAM, TNIK, DOCK10, MACF1, NEDD4, BCL11A, CDH4, PHACTR1, NEO1, CNTN6, PAK1, EPHA7, RAPGEF2, ADGRB3, ADAMTSL1, TBCD, NEDD4L, APP, DCLK1, STAU2, SEMA5A, VCL, ARHGAP44, BMPR1B, CTNNA2, PAK3, DIP2B, TRPC5, DNMI3, DIP2A, HECW1, COBL, ALCAM, NCAM1, CHN1, PAFAH1B1, NFIB, PRTG, TIAM1, ENAH, SEMA3C, SEMA6D, CDH11, PARD3, TNFR, ELAVL4, ABL1, SDCC2, USP33, PTPRO, TRIO, EXT1, CTNND2, ATP8A2, PLXNA2, SEMA3E, MARK2, EPHA6, ATL1, KNDC1, AFG3L2, ANK3, BCL11B, ECE1, MBP, CNTN1, PDLIM5, DISC1, WDPCP, SEMA3A, UNC5D, SEMA3D, RELN, UST, B4GALT6, PLS1, NIN, DRAXIN, GLI3, RERE, MAP2, FARP1, DCC, DAB1, PCDH15, NGEF, CDH23, ALS2, NTN1, DPYSL5, TANC2, ZDHHC17, LAMA3, TNN, LMX1A, ACTR2, MAP6, VASP, NRXN1, CELSR2, GAP43, ABI1, ITGA4, MEF2C, ADGRB1, WNT7A, S100B, FBXW8, NECN1, EPHA4, NTRK2, IL1RAPL1, NUMB, LHX9, FBXO31, PTK2, FEZ2, CYFIP1, UBE3A, SEMA4D, FYN, HECW2, CDH2, CNTN5, EPHB1, RPS6KA5, NRP1, CHODL, NRXN3, CUX1, EPHB2, PPFIA2, UNK, FLRT2, KALRN, LAMA1, TIAM2, BMP7, SLIT2, CCDC141, ROBO1, PRKCQ, NLGN1, EFNA5, SLIT3, NTNG1, FOXB1, SEMA4B, PTPRQ, FSTL4, IGF1R, GLI2</p>                                                                                                                                                                                                                                                                                                                                                                                                                                                                                                                                                                                                                                                                                                                                                                                                                                                                                   |
| GO:0051179 | localization                                          | 4.2635697620475034e-20 | <p>MTOR, UNC80, CACNA2D3, NSG1, SGCD, EXOC1L, WWC1, SLC17A1, ABCA13, IMMP2L, LRP12, SLC24A2, TRAPPC9, KCNH5, MICU2, SLC25A21, ANKS1B, LONP2, UNC13C, FTO, MX2, TMPRSS2, CLTCL1, SLC37A1, PIEZO2, MICAL3, SNAP25, AS1, DPP10, ZDHHC21, ITPR2, RIPOR2, PDE4D, RDX, STXB1, ERC1, RALA, SLC44A5, EPS15L1, BCL2, MYO5A, KCNMA1, SYT16, FBN1, GPHN, COG5, CHRNA7, GPR158, RIMS1, PIK3C3, SPIRE1, GABRB3, CNTLN, EXOC6B, SPAG16, MYO1E, TRAPPC8, USH2A, CEP192, RIMS2, CARMIL1, MCTP1, SV2C, ERBIN, FCHO2, RIN2, ANO6, CACNG2, GPC6, CNTNAP2, MAP4, CEP112, APC, MYO5C, CRKL, ILDR2, SETD2, TANGO6, TNIK, SLC4A10, PTPRJ, OCA2, EGFR, RFX3, DENND1A, A</p>                                                                                                                                                                                                                                                                                                                                                                                                                                                                                                                                                                                                                                                                                                                                                                                                                                                                                                                                                                                                                                                                                                                                                                                                                                                                                                                                                                                                                        |

|  |  |  |                                                                                                                                                                                                                                                                                                                                                                                                                                                                                                                                                                                                                                                                                                                                                                                                                                                                                                                                                                                                                                                                                                                                                                                                                                                                                                                                                                                                                                                                                                                                                                                                                                                                                                                                                                                                                                                                                                                                                                                                                                                                                                                                                                                                                                                                                                                                                                                                                                                                                                                                                                                                                                                                                                                                                                                                                                                                                                                                                                                                                                                                                                                                                                                                                                                                                                                                                                                                        |
|--|--|--|--------------------------------------------------------------------------------------------------------------------------------------------------------------------------------------------------------------------------------------------------------------------------------------------------------------------------------------------------------------------------------------------------------------------------------------------------------------------------------------------------------------------------------------------------------------------------------------------------------------------------------------------------------------------------------------------------------------------------------------------------------------------------------------------------------------------------------------------------------------------------------------------------------------------------------------------------------------------------------------------------------------------------------------------------------------------------------------------------------------------------------------------------------------------------------------------------------------------------------------------------------------------------------------------------------------------------------------------------------------------------------------------------------------------------------------------------------------------------------------------------------------------------------------------------------------------------------------------------------------------------------------------------------------------------------------------------------------------------------------------------------------------------------------------------------------------------------------------------------------------------------------------------------------------------------------------------------------------------------------------------------------------------------------------------------------------------------------------------------------------------------------------------------------------------------------------------------------------------------------------------------------------------------------------------------------------------------------------------------------------------------------------------------------------------------------------------------------------------------------------------------------------------------------------------------------------------------------------------------------------------------------------------------------------------------------------------------------------------------------------------------------------------------------------------------------------------------------------------------------------------------------------------------------------------------------------------------------------------------------------------------------------------------------------------------------------------------------------------------------------------------------------------------------------------------------------------------------------------------------------------------------------------------------------------------------------------------------------------------------------------------------------------------|
|  |  |  | <p> NGPT1,MACF1,DOCK2,NEDD4,GNPTAB,CRB1,BTBD9,CECR2,GRIK3,ATP2B2,TUSC3,ZFAND6,DNAJC13,RABEP1,GABRB1,DGKI,C12ORF4,GRIA1,TTC39B,NUP214,SLC39A12,SLC8A3,TOM1L2,CEP128,PRKD1,PAK1,CHRM3,GRAMD1B,RAPGEF2,LRP2,ARSB,FGF12,GABRA6,LDLRAD3,TMEM38B,AGK,RANBP17,SLC24A3,SLC44A1,UBE2L3,TAF4A,PTPRN2,SYN2,SMYD3,HERC2,TMEM241,GRM7,SEPTIN9,GHR,EPB41L3,KIF4A,THADA,NEDD4L,TRPM1,ADAM10,SLC39A11,APP,SLC7A2,ABCB5,CACNA1C,CACNB2,DCLK1,STAU2,GABRG2,TMC1,MAPRE2,SYT1,VCL,ARHGAP44,NTF3,NDUFAF2,CD2AP,AURKA,PARN,PYGO1,SLC8A1,ABCG8,KCNE4,ABCD2,FMN2,PCSK6,AKAP6,HOMER2,RAB8B,RFTN1,KCNK10,RANBP2,TRPC5,RAP1GDS1,CLIC6,KICS2,ERC2,DNM3,CUBN,SCP2,SYN3,IFT57,PRKCZ,GRB10,RYR3,MCPH1,RAB27B,CNST,HECW1,ABCA5,SV2B,YAP1,SEM1,VPS35L,MAPK1,CADPS2,KCNJ1,HRH2,ABCD3,RABGAP1L,SGTB,TRPC7,ADAM22,SLC45A4,COPB1,SYT10,UBE20,ANKFY1,SYCP1,NIPBL,SLC16A1,SPIDR,NIPAL2,IPO11,MICU1,CORO2B,PAFAH1B1,TM7SF3,STON2,VPS13D,TLK1,NF2,LRR38,GRIK4,RBFOX1,ZDHHC14,CORIN,CTNNA1,AKAP9,KLF15,RASGRF2,PPARA,SNX30,KCNS3,SYNJ1,GRM1,RSRC1,PTPRK,GABRG1,PARD3B,PLA2R1,DAPK1,SLC24A4,SEC14L1,VPS13C,TMEM108,DNAH11,JARID2,SCN2A,RAB22A,SORCS1,DNAJC15,AMPH,CPE,DYSF,ANK2,ADGRV1,BCAS3,RYR2,SYNE2,BBS2,SLC9C1,RANBP3L,NKAIN3,NKG7,NBEA,DUSP16,USP8,FABP7,PARD3,SLC36A1,TBC1D5,BLK,DST,CXADR,ATRX,ABL1,SLC1A1,PRKAA1,SLC12A8,KCNH1,FHIP1A,PRELID2,ANO4,CCDC91,EIPR1,DNAH5,NBAS,RAP1A,NKAIN2,MYO10,SLC46A3,GPC5,ZNHIT6,PLEKHA8,FGF10,GRID2,LATS2,NRG1,GSG1L,ASPM,AP3B1,RASGRF1,ATP11C,ABCB7,SYNE1,ZBTB16,MUSK,SH3GL3,ABCC12,PRKCE,SLCO3A1,SLMAP,WNK2,USP33,DENND4C,CEP83,FBN2,EGF,ABCC9,P2RX6,EXT1,STXBP6,PEX14,IFT43,ATP8A2,SCG5,PTPN2,TRIM5,PLXNA2,ATXN3,HTR2C,RIC3,CLEC16A,SLC2A3,ARHGFE7,ALG10B,ATP8A1,RFTN2,LTBP1,ZFYVE9,OPRM1,ABCC4,HTR2A,BIN2,CYBRD1,CYP4A11,CNNM4,STAC,TAF3,MARK2,ABHD17C,CNIH3,MSH2,IGF2BP3,APBA2,MAIP1,SH3KBP1,SLC2A13,EPN2,KCND2,TNPO3,ABCA10,GRK3,CD163,NOS2,AFG3L2,TTC7B,MDFIC,MYLK2,ANK3,NIPA2,TMC7,COG2,VPS41,LYPLA1,TRAPPC11,TMEM163,HHIP1,ANKFN1,HIP1,PRR5L,VPS37A,ATP6V1E1,VAV1,EFR3A,RUFY2,TJP1,NPHP4,PACSIN2,CNTN1,SNX3,CACNA1I,BHLHE40-AS1,KCNJ15,BRCA2,DISC1,DNER,WDPCH,SLC10A7,LRP1B,ADCY10,STX12,BMP2,ATP9A,TRAK1,EVI5,SCN11A,MSR1,VRK1,GNAI1,TBC1D4,MYRIP,TTR,RIN3,BMP2K,SLC15A5,NETO2,RELN,HMGB1,NUDCD3,CDS2,AP4E1,FGF9,SLC23A2,POLR2M,MYOM1,PRG4,UNC13B,TTC21B,DOCK1,PLS1,SNX8,SEC23B,SLC39A6,NIN,CCDC186,SLAMF1,KCNH8,GLI3,SNX6,SLC37A2,SLC9A4,GABRR2,PACS1,CNKSR3,GRIK2,MCTP2,MAP2,DAW1,PEX6,NEK10,RBFP1,ATF2,BBS4,LRR38B,MAPK8IP1,ANTXR1,KIAA0753,CFTTR,KPNA1,CSE1L,DOP1B,TBC1D13,NEU3,PHAF1,ATP10B,CHRM5,SLC30A10,DAB1,SELENON,NMD3,AKAP10,REPS1,PRKN,MTMR2,LYST,HEPHL1,GRIN2A,JPH1,ATXN1,TRPM6,CDH23,PRKCH,SLC12A1,FRMD4A,TG,ALS2,RACGAP1,ACO1,SNX25,FBLN5,OSCP1,KCNQ3,SHISA9,SLC4A4,TSPAN33,SCN10A,LRBA,MAP7,USP7,VA3,MON2,KCND3,MESD,ITSN2,SOX30,SYBU,RALB,YIPF6,KCN3,MYO1D,SEC24D,ROCK1,LYN,SEL1L,SLC44A2,SUMO3,SLC15A2,NTN1,CHKA,SLC13A5,RRAGD,BANP,CRACR2A,INSR,NP1PA1,CUL5,DBMT1,HECTD1,GRID1,SHROOM3,XRCC4,COLQ,SLC52A1,ARFGEF1,IGHV3-74,BID,PIGK,OSBPL10,RPH3A,TANC2,COX5A,ABCA4,UFD1,GABRG3,TRIM58,TOM1,PLPP4,ZDHHC17,NSD2,FYCO1,ESYT2,SH3GLB1,SLC22A14,CD9,CARD10,TMED3,XKR5,IFT81,ENPP1,UTRN,RASGRP1,IGSF11,SNX9,WDR72,KCNC1,GHRH,NUP37,BCL2L1,HCN1,GRIN2B,IGHV2-70D,CLNS1A,SYNJ2,ABCG1,KCNK5,SLC40A1,FAM149B1,CABYR,CIDEC,PSAP,CFHR4,MICALL2,MED1,IPCEF1,ATG4B,PCNT,SLC5A12,IL10,ACTR2,SFPQ,PTH,PRKAA2,NDC80,PACRG,VSTM2A,MAP6,PLA2G4A,SCFD2,KIFC1,SLC25A52,CAMLG,COX7A2L,SR </p> |
|--|--|--|--------------------------------------------------------------------------------------------------------------------------------------------------------------------------------------------------------------------------------------------------------------------------------------------------------------------------------------------------------------------------------------------------------------------------------------------------------------------------------------------------------------------------------------------------------------------------------------------------------------------------------------------------------------------------------------------------------------------------------------------------------------------------------------------------------------------------------------------------------------------------------------------------------------------------------------------------------------------------------------------------------------------------------------------------------------------------------------------------------------------------------------------------------------------------------------------------------------------------------------------------------------------------------------------------------------------------------------------------------------------------------------------------------------------------------------------------------------------------------------------------------------------------------------------------------------------------------------------------------------------------------------------------------------------------------------------------------------------------------------------------------------------------------------------------------------------------------------------------------------------------------------------------------------------------------------------------------------------------------------------------------------------------------------------------------------------------------------------------------------------------------------------------------------------------------------------------------------------------------------------------------------------------------------------------------------------------------------------------------------------------------------------------------------------------------------------------------------------------------------------------------------------------------------------------------------------------------------------------------------------------------------------------------------------------------------------------------------------------------------------------------------------------------------------------------------------------------------------------------------------------------------------------------------------------------------------------------------------------------------------------------------------------------------------------------------------------------------------------------------------------------------------------------------------------------------------------------------------------------------------------------------------------------------------------------------------------------------------------------------------------------------------------------|

|            |                               |                        |                                                                                                                                                                                                                                                                                                                                                                                                                                                                                                                                                                                                                                                                                                                                                                                                                                                                                                                                                                                                                                                                                                                                                                                                                                                                                                                                                                                                                                                                                                                                                                                                                                                                                                                                                                                                                                                                                                                                                                                                                                                                                                                                                                                                                                                                                                                                                                                                                                                                                                                                                                                                                                   |
|------------|-------------------------------|------------------------|-----------------------------------------------------------------------------------------------------------------------------------------------------------------------------------------------------------------------------------------------------------------------------------------------------------------------------------------------------------------------------------------------------------------------------------------------------------------------------------------------------------------------------------------------------------------------------------------------------------------------------------------------------------------------------------------------------------------------------------------------------------------------------------------------------------------------------------------------------------------------------------------------------------------------------------------------------------------------------------------------------------------------------------------------------------------------------------------------------------------------------------------------------------------------------------------------------------------------------------------------------------------------------------------------------------------------------------------------------------------------------------------------------------------------------------------------------------------------------------------------------------------------------------------------------------------------------------------------------------------------------------------------------------------------------------------------------------------------------------------------------------------------------------------------------------------------------------------------------------------------------------------------------------------------------------------------------------------------------------------------------------------------------------------------------------------------------------------------------------------------------------------------------------------------------------------------------------------------------------------------------------------------------------------------------------------------------------------------------------------------------------------------------------------------------------------------------------------------------------------------------------------------------------------------------------------------------------------------------------------------------------|
|            |                               |                        | <p>EBF2, ANP32B, AIMP1, LASP1, FYB2, NRXN1, PCID2, ENTHD1, SNA P91, CENPE, PEG10, TWIST1, JAK2, SLC1A7, RPF2, MPPE1, CELSR 2, MELTF, TNKS, ARL11, SIAH3, TRPV5, UFL1, NFKBIA, PRKCB, GO T2, ABCC8, MIPEP, CACNA1E, ANP32A, RTRAF, USH1C, NEDD9, NRB P1, ATP2B1, SLC14A2, CLCA4, MTCL1, GRIP1, IGHV10R15- 9, TM9SF3, SAR1A, CNIH1, TRAPPC3, XKR6, OTOF1, CIDEA, BBS9, EXT2, EXOC1, HEPACAM, SLC6A1, NDFIP2, MAP2K6, SHROOM2, RN7 SL483P, SLC6A11, KCNJ18, CEMIP, CBLIF, PARK7, MAPK8, ITGA4, OAZ2, BCAP29, UBE2J2, ADCYAP1R1, PLA2G12B, NDC1, TM9SF4, RAPGEF4, CEP120, ATP13A3, ARL4C, EFHB, MEF2C, STOML1, ADGR B1, RXRA, WNT7A, NDFIP1, SLC5A9, ATP6V1C2, CHAMP1, MAGEL2, SLC10A6, RAB38, SDCBP, NECTIN1, JPT2, PASK, FLVCR1, FGR, CD CA8, TRIM23, ATP6V1B2, SNAP29, C2, INTS13, GABRA5, NTRK2, I L1RAPL1, NUMB, ADAMTS9, RN7SL767P, COLEC12, PLEKHA3, OCLN, STON1-</p> <p>GTF2A1L, SHISA6, MEGF10, AKAP11, TRPM7, KTN1, GRIK1, IREB2, MFSD9, MYB12B, PTK2, MARK4, CDH5, CD5L, APOL2, AP4S1, ARHG AP12, CLDN18, MPP7, DIAPH1, SCAMP1, CYFIP1, UBE3A, SCG3, AP OL1, PITPNC1, FRMD6, AP2B1, SCARA5, SLC26A2, HEATR5A, ZFYV E1, ICA1, PLCZ1, NOS1AP, MTPP, SLC9A5, SRP9, CCDC88A, NSUN2, SLC27A6, SPAG6, SLC5A1, BICD1, ANO10, TNFSF11, FYN, PPM1F, ARL13B, XPO7, ODR4, SCN8A, SLF1, TMEM63C, NCS1, ATP5PF, AL B, ATP9B, NALCN, EHBP1, MAPK9, APELA, TRPM3, SLC39A8, SLC16 A9, ASB3, HECW2, CDH2, ITGA8, FBXL20, GPR137B, ZDHHC18, GRM 5, TBC1D1, PID1, NRPI, FCHSD2, IFT46, ATPSCKMT, RNF215, CRO T, NRIP1, ABCA6, SLC14A1, MCC, BCR, NRXN3, ELMO1, KIF16B, AR FGAP3, TM9SF2, STK36, NSG2, MB, KCNJ6, B9D1, BMPER, RABL2A, CUX1, DPP6, SLC35F1, MACROH2A1, EPHB2, TSPAN13, CSNK1G1, C D38, MYO5B, RGPD4, PPIL2, AKAIN1, MET, DLG2, CDH17, ATP6V0D 2, PPPIA2, CDH13, STXBP4, CACNG3, ATG5, MAGI2, SLC35F4, VMP 1, KALRN, SLC1A2, GNAS, MFHAS1, NUP43, BMP7, TMPRSS15, ASTN 2, DLG5, GAPVD1, GABRA2, TRAPPC10, DDX6, WDR41, PLIN2, ABL2, VPS13B, TRAPPC6B, TMPRSS3, EXOC4, FAM126A, KCNTP4, CCDC1 41, ERBB4, FAM3B, FAM126B, SYNDIG1, NUF2, RGPD2, SAMM50, AN TXR1, SORCS2, TRDN, NLGN1, NOS1, SLC6A3, ASIC2, EFNA5, GAS2 L1, RAB27A, KIF13A, AP5M1, ESR1, DNAH9, SLC25A48, KCNQ5, LO XL2, CACNA2D1, IGLC3, IRAG2, PRLR, HTT, ZDHHC11B, FOXB1, CA MK1D, SLC25A18, HLA-</p> <p>F, FER, EYA2, KATNIP, CCR2, PITPNM3, OSBPL5, OSBPL6, IGHV10 R21-</p> <p>1, ANO2, GRIA4, AGAP1, ROCK2, IL16, TERB2, CDCA5, CATSPER2, RAB31, HSPG2, HERPUD1, WASHC1, RGS7, HOOK3, CLDN10, BARD1, CLCN5, STK3, ZNF423, SLC13A4, PNPLA8, HNRNPU, VTI1A, CEP72, RAB3GAP2, CADPS, IGF1R, KCNAB1, PRKAG2, TANGO2, AKAP13, M ORC3, ATP10A, SEPTIN6, DNMI1L</p> |
| GO:0051716 | cellular response to stimulus | 1.9101105817948162e-19 | <p>NOTCH2, BCAR3, BRINP3, MTOR, NSG1, SGCD, WWC1, IMMP2L, GARN L3, LRP12, PTPRD, SLC24A2, ANKS1B, MYO9A, ULK2, NLK, FTO, KS R1, ZNF236, PLCB1, ZNF536, TAF4A5, PIEZO2, TENM4, DLC1, ZDHH C21, PTPRA, ITPR2, RIPOR2, PDE4D, RDX, RP1, STXBP1, ERC1, RA LA, IL1RAPL2, BCL2, MYO5A, ARPP21, PRDM16, ALDH1A2, ARHGAP 26, FBN1, CHRNA7, DCDC1, GPR158, ROBO2, RIMS1, PIK3C3, EPC2, SPIRE1, TENM3, GABRB3, ZEB1, AKR1C3, RAR, FGD4, SPRED1, E NPEP, MYO1E, PLPPR1, MINAR1, CDC42EP3, RIMS2, ALK, AUTS2, A DGRE1, MCTP1, PJA2, BABAM2, ERBIN, ERCC6L2, RHPN2, RIN2, AN O6, CACNG2, DLGAP1, GLYAT, MLLT3, EGLN3, GPC6, MAP3K9, APC, HHLA2, PLPPR5, DSCAM, CRKL, SOX5, SETD2, ERG, ARHGAP24, TNI K, PTPRJ, KDM4C, NEK4, DOCK10, EGFR, DENND1A, USP14, ANGPT1, BACH1, MACF1, PRKACB, NEK7, RGS3, NCOR1, RNF220, DOCK2, UT T3A2, NEDD4, MAML2, SCAI, CRB1, NSMCE2, BCL11A, SOX6, FAM83 F, SGMS1, GRIK3, CHSY1, NTRK3, RXFP1, C5, PDE1C, ZFAND6, CYP 2C9, DKK2, FLT1, RFC3, RABEP1, MAPKBP1, NAT1, GABRB1, DGKI, INVS, EDAR, GRIA1, NEO1, CNTN6, SLC39A12, SLC8A3, TOM1L2, P RKD1, TPTE2, PAK1, GMDS, EPHA7, CTNNAL1, NCOA7, CHRM3, ADSS 2, GRAMD1B, RALGPS1, SPEN, RAPGEF2, PELI2, LRP2, ADGRB3, RU NX2, FGF12, GABRA6, CPS1, TAOK3, ONECUT1, CPBE4, TMEM38B, P RICKLE2, UBE2L3, TAF4A, BTBD11, PTPRN2, CCL28, SMYD3, PATJ</p>                                                                                                                                                                                                                                                                                                                                                                                                                                                                                                                                                                                                                                                                                                                                                                                                                                                                                                                                                                                                                                                                                                                                                                                                                                                                                                               |

|  |  |  |                                                                                                                                                                                                                                                                                                                                                                                                                                                                                                                                                                                                                                                                                                                                                                                                                                                                                                                                                                                                                                                                                                                                                                                                                                                                                                                                                                                                                                                                                                                                                                                                                                                                                                                                                                                                                                                                                                                                                                                                                                                                                                                                                                                                                                                                                                                                                                                                                                                                                                                                                                                                                                                                                                                                                                                                                                                                                                                                                                                                                                                                                                                                                                                                                                                                                                                                                                                                                                                                            |
|--|--|--|----------------------------------------------------------------------------------------------------------------------------------------------------------------------------------------------------------------------------------------------------------------------------------------------------------------------------------------------------------------------------------------------------------------------------------------------------------------------------------------------------------------------------------------------------------------------------------------------------------------------------------------------------------------------------------------------------------------------------------------------------------------------------------------------------------------------------------------------------------------------------------------------------------------------------------------------------------------------------------------------------------------------------------------------------------------------------------------------------------------------------------------------------------------------------------------------------------------------------------------------------------------------------------------------------------------------------------------------------------------------------------------------------------------------------------------------------------------------------------------------------------------------------------------------------------------------------------------------------------------------------------------------------------------------------------------------------------------------------------------------------------------------------------------------------------------------------------------------------------------------------------------------------------------------------------------------------------------------------------------------------------------------------------------------------------------------------------------------------------------------------------------------------------------------------------------------------------------------------------------------------------------------------------------------------------------------------------------------------------------------------------------------------------------------------------------------------------------------------------------------------------------------------------------------------------------------------------------------------------------------------------------------------------------------------------------------------------------------------------------------------------------------------------------------------------------------------------------------------------------------------------------------------------------------------------------------------------------------------------------------------------------------------------------------------------------------------------------------------------------------------------------------------------------------------------------------------------------------------------------------------------------------------------------------------------------------------------------------------------------------------------------------------------------------------------------------------------------------------|
|  |  |  | ,HERC2,GRM7,RPTOR,TMEM117,GHR,COL4A2,RALGAP1,RAPGEF5,PPP1R12B,TRPM1,ADAM10,HDAC9,IL1R1,APBB2,APP,RPS6KA2,CACNA1C,MTUS1,DCLK1,STAU2,GABRG2,DOCK8,MAPRE2,USP18,SEMA5A,SYT1,ARHGAP44,NTF3,ACER2,NDUFAF2,CD2AP,AURKA,ST18,PYGO1,SLC8A1,HERPUD2,PTPRR,TAF2,ABCG8,ECFAS,KANK1,MAP4K4,BMPR1B,FMN2,PCSK6,AKAP6,HOMER2,HAHDB,ARNT,RAB8B,PAK3,RFTN1,PDE1A,KCNK10,LARP1,ITPKB,RGS20,PDE10A,UBE2E2,RAP1GDS1,HHAT,KICS2,NBN,IFT57,INTS7,SUSD6,PRKCZ,BTLA,GRB10,RYR3,MSH6,ARHGAP32,RGS9,HECW1,DEFA3,DUSP22,YAP1,SEM1,WDR70,PPM1L,SHC4,BRINP1,MAPK1,MGAT5,HRH2,SGTB,USP25,ALCAM,PDGFD,SYT10,ZNRF3,PPP1R1C,ITGBL1,ARHGEF17,NRG3,UBE2O,NCAM1,GFRA1,SYCP1,NIPBL,SLC16A1,SPIDR,GABPA,MICU1,CORO2B,CHD6,STK38,PTPN13,CHN1,HRH4,SORCS3,MYLK3,GLP2R,PAFAH1B1,ATF6,EFEMP1,TM7SF3,ITGB8,TLK1,TPM1,NF2,CNKSR2,GRIK4,HIVEP1,CTNNA1,PPP1R9A,MOB3B,BIRC6,AKAP9,KLF15,RASGRF2,PPARA,ERMP1,RLG1,NR5A2,ADAMTS3,TIAM1,ARAP2,GRM1,PTPRK,ARHGEF12,GABRG1,PAK5,TRERF1,PCDH11Y,PPP2R5E,PLA2R1,SEMA3C,DAPK1,SLC24A4,SEC14L1,VPS13C,TMEM108,ACSM2B,WDHD1,STK32B,MAGI1,ALPK2,JARID2,SCN2A,RIC8B,SORCS1,DNAJC15,CPE,EVC2,IL34,ANK2,ADGRV1,MELK,BCAS3,RYR2,BBS2,WNT9B,OR4F6,NKG7,SEMA6D,DUSP16,SMARCA4,USP8,PARD3,MAPKAP1,EFTUD2,PIAS1,SPG21,BLK,TNR,GRM8,DSPT,CXADR,DOCK4,MBD5,ATRX,NUAK1,PTPRT,ELAVL4,ABL1,PTPN12,HDAC4,OXR1,SLC1A1,PRKAA1,GAS2,KCNH1,ITGB3BP,APBB1P,APLF,NFAT5,MAST4,GUCY1A2,SLFN11,RAP1A,MYO10,GPCC5,CAMK4,INPP5A,FGF10,ZC3H4V1,GRID2,LATS2,NRG1,INO80D,GSG1L,ASPM,AP3B1,DENND2B,RASGRF1,MUSK,ZNF675,GNG7,SMARCA1,SH3GL3,PRKCE,NXN,WNK2,ESRRG,DGKB,USP33,DENND4C,FBN2,CD44,RGS12,PTPRO,EGF,P2RX6,TRIO,PDE3A,EXT1,NSMAF,LNPEP,LIMD1,SPRED2,RPS6KA3,CTNND2,SCG5,MTMR3,PTPN2,TRIM5,PLXNA2,MCF2L,OR4F15,ATXN3,RFC1,HTR2C,CLEC16A,ARHGEF7,AMBRA1,LTBP1,STK38L,ZFYVE9,OPRM1,ABCC4,HTR2A,BIN2,PLCXD3,FANCM,FANCA,INPP4B,KREMEN1,STAC,SEMA3E,MARK2,GCSAML,TMEM67,ALPL,FHL2,ADGRA3,CN1H3,PUM1,TMOD2,MSH2,GNAL,EPHA6,ANKRD17,RELL1,HIPK3,EPN2,KCND2,EVC,GRK3,KNDC1,SPSB4,CLSPN,NOS2,CPNE4,MO SMO,GFRA2,MNAT1,TMEM116,RBBP8,MDFIC,ADAM12,ANK3,HMGA2,GBP6,CCND3,VPS41,DOCK5,ECE1,STK32A,CREM,MBP,PLCE1,TGFA,IL17RA,HIP1,CRIM1,PRR5L,GSR,CAPN5,VAV1,MSRA,FBXO32,TJP1,LDLRAD4,NPHP4,CNTN1,IQSEC1,SNX3,CACNA1I,BRCA2,DISC1,DNER,BLM,ASB7,WDPCP,NRK,SEMA3A,MAGI3,H SF2BP,ADCY10,PSG8,STRN,OR9Q1,BMP2,RC3H2,UNC5D,PSG9,CDC42BPB,SOGA1,MSR1,VRK1,GNAI1,RALGAP2,TBC1D4,RANBP9,TTR,RIN3,BMP2K,TMEM161A,SEMA3D,NETO2,PDE6C,CABIN1,LEMD3,RELN,ARHGAP42,HMGB1,GNAQ,FGF9,NFATC2,SH3BP5,SLC23A2,POLR2M,ZNF106,MYOM1,TRAF3,UNC13B,TTC21B,DS TYK,UIMC1,DOCK1,RAP1GAP,SRGAP2,DRAXIN,ATF1,CCDC186,SLAMF1,SMARCA2,FAM83B,GLI3,CGAS,SMARCC1,SNX6,GABRR2,SMOC2,PCP4,CNKSR3,CASP5,GRIK2,IDE,WDR12,MCTP2,CUL1,MYEF2,ZFYVE26,PSD3,GAREM1,LAMC1,NEK10,MOB1B,ATF2,C YLD,UMODL1,BBS4,MAPK8IP1,MX1,PSG6,GABBR2,ITGA9,CFTR,KPNA1,UBASH3A,RGMB,NEU3,KITLG,DNAJC7,CAMTA1,UBR1,D CC,CHRM5,MAP4K3,SLC30A10,RCAN1,RORB,CHAF1A,DAB1,SEL ENON,RB1CC1,AKAP10,PTPRE,PRKN,MTMR2,TBX20,DLGAP2,AF AP1,MAPK10,DPF3,LYST,NGEF,GRIN2A,ARID5B,TXNRD2,WSB1,USP43,LALBA,PRKCH,PKP1,HUNK,TG,IL6R,ALS2,RACGAP1,N LRC5,OR51E1,MKNK1,DOCK9,SNX25,DMC1,FBLN5,SHISA9,PDE 6A,COPS8,SHANK2,ST8SIA1,USP7,VAV3,MESD,SOX30,MOK,KI R2DL4,ARHGEF28,RALB,NPAS2,ADGRG6,ROCK1,LYN,VCAM1,SE L1L,ARHGAP28,ARHGAP31,CTSB,EIF2B3,SLC44A2,GSTA3,SLC 15A2,DTX1,TENM2,OVOL2,ZBTB33,ADA2,NTN1,CHKA,PLCB4,F ANCL,DPYSL5,SLC13A5,RRAGD,SUPT16H,ARID1B,CRACR2A,RN F152,OTUD7A,INSR,CUL5,OR7A17,BMF,YTHDF3,TEFF1,DEDD2, NEK6,GRID1,SHROOM3,XRCC4,NMU,ARFGEF1,GAST,SNAI2,ASH 1L,IGHV3- |
|--|--|--|----------------------------------------------------------------------------------------------------------------------------------------------------------------------------------------------------------------------------------------------------------------------------------------------------------------------------------------------------------------------------------------------------------------------------------------------------------------------------------------------------------------------------------------------------------------------------------------------------------------------------------------------------------------------------------------------------------------------------------------------------------------------------------------------------------------------------------------------------------------------------------------------------------------------------------------------------------------------------------------------------------------------------------------------------------------------------------------------------------------------------------------------------------------------------------------------------------------------------------------------------------------------------------------------------------------------------------------------------------------------------------------------------------------------------------------------------------------------------------------------------------------------------------------------------------------------------------------------------------------------------------------------------------------------------------------------------------------------------------------------------------------------------------------------------------------------------------------------------------------------------------------------------------------------------------------------------------------------------------------------------------------------------------------------------------------------------------------------------------------------------------------------------------------------------------------------------------------------------------------------------------------------------------------------------------------------------------------------------------------------------------------------------------------------------------------------------------------------------------------------------------------------------------------------------------------------------------------------------------------------------------------------------------------------------------------------------------------------------------------------------------------------------------------------------------------------------------------------------------------------------------------------------------------------------------------------------------------------------------------------------------------------------------------------------------------------------------------------------------------------------------------------------------------------------------------------------------------------------------------------------------------------------------------------------------------------------------------------------------------------------------------------------------------------------------------------------------------------------|



|            |                      |                        |                                                                                                                                                                                                                                                                                                                                                                                                                                                                                                                                                                                                                                                                                                                                                                                                                                                                                                                                                                                                                                                                                                                                                                                                                                                                                                                                                                                                                                                                                                                                                                                                                                                                                                                                                                                                                                                                                                                                                                                                                                                                                                                                                                                                                                                                                                                                                                                                                                                                                                                                                                                                                                                                                                                                                                                                                                                                                                                                                                                                                                                                                                                                                                                                                                                                                                                                                                                                                                                                                                                                                                                                                                            |
|------------|----------------------|------------------------|--------------------------------------------------------------------------------------------------------------------------------------------------------------------------------------------------------------------------------------------------------------------------------------------------------------------------------------------------------------------------------------------------------------------------------------------------------------------------------------------------------------------------------------------------------------------------------------------------------------------------------------------------------------------------------------------------------------------------------------------------------------------------------------------------------------------------------------------------------------------------------------------------------------------------------------------------------------------------------------------------------------------------------------------------------------------------------------------------------------------------------------------------------------------------------------------------------------------------------------------------------------------------------------------------------------------------------------------------------------------------------------------------------------------------------------------------------------------------------------------------------------------------------------------------------------------------------------------------------------------------------------------------------------------------------------------------------------------------------------------------------------------------------------------------------------------------------------------------------------------------------------------------------------------------------------------------------------------------------------------------------------------------------------------------------------------------------------------------------------------------------------------------------------------------------------------------------------------------------------------------------------------------------------------------------------------------------------------------------------------------------------------------------------------------------------------------------------------------------------------------------------------------------------------------------------------------------------------------------------------------------------------------------------------------------------------------------------------------------------------------------------------------------------------------------------------------------------------------------------------------------------------------------------------------------------------------------------------------------------------------------------------------------------------------------------------------------------------------------------------------------------------------------------------------------------------------------------------------------------------------------------------------------------------------------------------------------------------------------------------------------------------------------------------------------------------------------------------------------------------------------------------------------------------------------------------------------------------------------------------------------------------|
|            |                      |                        | <p>74, BID, SIAH2, ABCA4, TRABD2B, UFD1, RXRG, ERN2, GABRG3, MBTPS2, FLNB, TIAL1, TOM1, PLPP4, NREP, ZDHHC17, NSD2, SH3GLB1, CD9, CARD10, RALGPS2, JCAD, OR4K2, SAMHD1, IFT81, ENPP1, RASGRP1, IGSF11, PXDNL, NDRG2, CSNK2A1, BMP5, PWWP3A, KCNC1, CSF1, GHRH, HDGFL3, BCL2L1, SERPINB9, HCN1, PRKG1, LAMA3, ASB4, GRIN2B, GRB14, INO80, FANCB, GPR156, IGHV2-70D, DHRS3, SMAD5, CELF4, ABCG1, OR4C46, FOXN3, SLC40A1, PRAME, TNN, PSAP, MED1, IPCEF1, CDC14B, PCNT, IL33, GPRC5C, ROR2, KL, RASGEF1C, BANK1, IL10, ACTR2, OR1L6, SFPQ, PTH, SOST, DC1, PRKAA2, CSF2RB, DIRAS2, NDC80, PACRG, ABHD2, ITPRIP, VSTM2A, PLA2G4A, RAB12, IQGAP1, RPS12, CAMLG, TEAD1, MORC2, SREBF2, YBX3, AIMP1, THNSL2, FYB2, NRXN1, PCID2, HIPK1, DGK, CD70, CIBAR1, PBLD, FICD, CACYBP, PEG10, NET1, SIPA1L2, TWIST1, AKT3, ALKAL2, JAK2, RPF2, FSTL1, CHCHD6, ZBTB38, SVEP1, MADD, HCRTR1, PTGS1, CELSR2, FH, TDP1, CREBBP, TNKS, GORAB, PCNA, UFL1, NFKBIA, PRKCB, OR2T3, ABCC8, ANXA4, MT1HL1, ZC3H15, ANP32A, RFC2, BRD4, SMPD4, NEDD9, OLFM4, NRBP1, ITGA6, ATP2B1, GAP43, ASS1, GRIP1, IGHV10R15-9, ADGRE3, ADCY9, PPP1R17, CNIH1, MAST2, ERLIN2, OTOP1, CIDEA, ARFGEF3, EXT2, EXOC1, GID8, STAT1, BRMS1L, NDFIP2, NR2C1, MAP2K6, CMTM7, DGKG, SHROOM2, MARCHF6, MTPN, ABI1, IMPACT, CCBE1, PARK7, ADAMTS18, MAPK8, ITGA4, TOP3A, FBXL17, UBL7, UBE2J2, ADCYAP1R1, MTF2, NCAPG2, RAPGEF4, OR6C75, ASB2, MYOCD, MYH13, CYFIP2, HNRNPM, ACACA, ASCC2, EFHB, OR13C9, MEFC2, ADGRB1, RXRA, WNT7A, RBPMS2, MAP3K5, NDFIP1, MAP3K4, S100B, ATP6V1C2, C16ORF72, PKN2, RAD51AP1, OR10H2, PDE2A, RAB38, LRRC2, SDCBP, JPT2, SPPL2B, NSMCE1, WWOX, PASK, NCK1, FGR, CDCA8, PPP2R3A, DNMBP, CXCL2, IFNAR1, RNF8, GNG12, EPHA4, CYTH4, GABRA5, MECOM, NTRK2, IL1RAPL1, WNT2B, COLEC12, POSTN, CD101, SHISA6, IL17RD, FBXO31, AKAP11, GRIK1, PRKAB1, DTHD1, MVB12B, PTK2, ERP27, MARK4, CDH5, TPH2, RCAN2, ANKRD6, NFKBID, ARHGAP12, CLDN18, DIAPH1, FEZ2, INIP, LAMB1, APIP, CYFIP1, UBE3A, SEMA4D, PITPNC1, MC2R, ZBTB20, FAT4, IMPA2, AKR1B1, WNT5B, RASGEF1B, AMFR, SAXO1, SCARA5, NENF, PTGFR, ZFYVE1, OR4L1, PLCZ1, NOS1AP, FCRLA, DIDO1, TPTE, SORBS2, CNKSR1, CCDC88A, GPR55, NSUN2, CHCHD2, CDC45, OR11G2, BICD1, TNFSF11, FYN, BUB1, PPM1F, ADGRL2, ARL13B, SDE2, RBMS3, HDAC2, SLF1, SH2D3C, DOCK3, ALB, DOK5, ZFYVE28, MAPK9, APELA, ROR1, FUT8, TET1, ASB3, CDH2, ITGA8, SEL1L2, RAD9A, PLLP1, GPR137B, EPHB1, RP1L1, GRM5, RAI14, RPS6KA5, TBC1D1, LRRC69, PTPRG, PID1, NRP1, PRKCA, GBP4, FAIM, SAMD12, FAAP24, FHIT, ITGA1, RNF138, RC3H1, NRIP1, POR, MCC, SUPT3H, BCR, NRXN3, ELMO1, RGS6, RERG, KIF16B, SNRK, C14ORF39, ELP2, FBLN1, STK36, NSG2, B9D1, RRAS2, GNA14, BMPER, PRDM15, SRGAP3, MITF, EPHB2, CSNK1G1, CD38, EYA4, CDK14, MET, SPPL3, DLG2, CDH17, CDH13, STXBP4, CACNG3, ATG5, MAGI2, PRDM11, FLRT2, KALRN, SLC1A2, GNAS, LAMA1, MFHAS1, ATRNL1, TIAM2, BMP7, DLG5, GAPVD1, GABRA2, OR2T2, ZMYND11, TMEM25, GRM3, ADGRF5, OR4N2, PDGFC, PLIN2, PPP1R13B, ABL2, RFX2, PARPBP, EYA1, SLIT2, CNOT7, KCTD8, PLCL1, ERBB4, IL20RB, FAM3B, TRHDE, ROBO1, IRAG1, NUF2, PRKCQ, NDRG1, SORCS2, SIPA1L3, MGMT, NLGN1, SHLD2, NOS1, GLDC, ASIC2, EFNA5, GAS2L1, ARHGEF11, MTREX, SLIT3, DTNA, ESR1, MYO9B, CYP2C8, CACNA2D1, NYAP2, IGLC3, IQCJ-SCHIP1, ADGRG7, SKAP2, PRLR, AGO3, HTT, RAD51B, CAMK1D, PIK3R3, MACROD2, FER, EYA2, CCR2, STARD13, CHFR, EPS8, OARD1, SEMA4B, IGHV10R21-1, HRH1, GRIA4, ROCK2, RORA, IL16, DMRT1, CDCA5, PPP1CB, RGS8, RAB31, PDK1, HERPUD1, NCOA6, COL4A3, RGS7, KIF7, GNG2, FSTL4, BARD1, PNPLA3, STK3, DEPTOR, ZNF423, RSU1, PNPLA8, HNRNPU, APCDD1, IGF1R, PRKAG2, GLI2, THRB, AKAP13, MORC3, DNMI1L</p> |
| GO:0050896 | response to stimulus | 1.6136615129673651e-18 | <p>NOTCH2, BCAR3, BRINP3, MTOR, CNTN4, NSG1, SGCD, WWC1, IMMP2L, GARNL3, LRP12, PTPRD, SLC24A2, ANKS1B, MYO9A, ULK2, NLK, LONP2, FTO, KSR1, ZNF236, PLCB1, ZNF536, MX2, TAF5, PIEZO2, TENM4, DLC1, ZDHHC21, PTPRA, ITPR2, RIPOR2, PDE4D, RDX, RP1, STXBP1, ERC1, RALA, IL1RAPL2, BCL2, MYO5A, KCNMA1, ARPP2</p>                                                                                                                                                                                                                                                                                                                                                                                                                                                                                                                                                                                                                                                                                                                                                                                                                                                                                                                                                                                                                                                                                                                                                                                                                                                                                                                                                                                                                                                                                                                                                                                                                                                                                                                                                                                                                                                                                                                                                                                                                                                                                                                                                                                                                                                                                                                                                                                                                                                                                                                                                                                                                                                                                                                                                                                                                                                                                                                                                                                                                                                                                                                                                                                                                                                                                                                            |

|  |  |  |                                                                                                                                                                                                                                                                                                                                                                                                                                                                                                                                                                                                                                                                                                                                                                                                                                                                                                                                                                                                                                                                                                                                                                                                                                                                                                                                                                                                                                                                                                                                                                                                                                                                                                                                                                                                                                                                                                                                                                                                                                                                                                                                                                                                                                                                                                                                                                                                                                                                                                                                                                                                                                                                                                                                                                                                                                                                                                                                                                                                                                                                                                                                                                                                                                                                                                                                                                                                                                                                                                                                                                                                                                                                                                                                                                                                                                                                                                                                                                                                                                  |
|--|--|--|----------------------------------------------------------------------------------------------------------------------------------------------------------------------------------------------------------------------------------------------------------------------------------------------------------------------------------------------------------------------------------------------------------------------------------------------------------------------------------------------------------------------------------------------------------------------------------------------------------------------------------------------------------------------------------------------------------------------------------------------------------------------------------------------------------------------------------------------------------------------------------------------------------------------------------------------------------------------------------------------------------------------------------------------------------------------------------------------------------------------------------------------------------------------------------------------------------------------------------------------------------------------------------------------------------------------------------------------------------------------------------------------------------------------------------------------------------------------------------------------------------------------------------------------------------------------------------------------------------------------------------------------------------------------------------------------------------------------------------------------------------------------------------------------------------------------------------------------------------------------------------------------------------------------------------------------------------------------------------------------------------------------------------------------------------------------------------------------------------------------------------------------------------------------------------------------------------------------------------------------------------------------------------------------------------------------------------------------------------------------------------------------------------------------------------------------------------------------------------------------------------------------------------------------------------------------------------------------------------------------------------------------------------------------------------------------------------------------------------------------------------------------------------------------------------------------------------------------------------------------------------------------------------------------------------------------------------------------------------------------------------------------------------------------------------------------------------------------------------------------------------------------------------------------------------------------------------------------------------------------------------------------------------------------------------------------------------------------------------------------------------------------------------------------------------------------------------------------------------------------------------------------------------------------------------------------------------------------------------------------------------------------------------------------------------------------------------------------------------------------------------------------------------------------------------------------------------------------------------------------------------------------------------------------------------------------------------------------------------------------------------------------------------|
|  |  |  | <p>1, PRDM16, ALDH1A2, ARHGAP26, FBN1, F13A1, GPHN, CDH8, CHRN A7, DCDC1, GPR158, ROBO2, RIMS1, PIK3C3, EPC2, SPIRE1, TENM 3, GABRB3, ZEB1, AKR1C3, RARB, FGD4, SPRED1, ENPEP, MYO1E, P LPPR1, USH2A, CEP192, MINAR1, CDC42EP3, LAIR1, RIMS2, ALK, AUTS2, ADGRE1, MCTP1, PJA2, BABAM2, PAPPA2, ERBIN, ERCC6L2, RHPN2, HLCS, RIN2, ANO6, CACNG2, DLGAP1, GLYAT, NAALADL2, MLLT3, EGLN3, GPC6, SUS4, CNTNAP2, MAP3K9, MYO3B, APC, HHL A2, PLPPR5, DSCAM, CRKL, ILDR2, SOX5, SETD2, ERG, ARHGAP24, TNIK, SLC4A10, PTPRJ, KDM4C, NEK4, DOCK10, EGFR, DENND1A, U SP14, ANGPT1, BACH1, MACF1, PRKACB, NEK7, RGS3, NCOR1, RNF2 20, HMCN2, DOCK2, UGT3A2, NEDD4, MYOF, MAML2, SCAI, CRB1, NS MCE2, BCL11A, SOX6, FAM83F, PSMB2, SGMS1, GRIK3, CHSY1, CDH 4, B3GALT5, NTRK3, RXFP1, C5, PDE1C, ZFAND6, CYP2C9, DKK2, F LT1, RFC3, RABEP1, MAPKBP1, AOA, NAT1, GABRB1, DGKI, INVS, C12ORF4, EDAR, GRIA1, NEO1, CNTN6, SLC39A12, SLC8A3, TOM1L 2, PRKD1, TPTE2, PAK1, GMDS, EPHA7, CTNNAL1, NCOA7, CHRM3, A DSS2, GRAMD1B, RALGPS1, SPEN, RAPGEF2, PELI2, LRP2, ADGRB3, RUNX2, ARSB, FGF12, GABRA6, CPS1, TAOK3, ONECUT1, CPEB4, T MEM38B, ADAMTSL1, BCKDHB, PRICKLE2, UBE2L3, TAFA4, BTBD11, PTPRN2, CCL28, SMYD3, IGLV10-</p> <p>54, PATJ, HERC2, GRM7, RPTOR, TMEM117, GHR, COL4A2, RALGAPA 1, RAPGEF5, PPP1R12B, TRPM1, ADAM10, HDAC9, IL1R1, APBB2, A PP, RPS6KA2, SAMSN1, KYN, CACNA1C, MTUS1, DCLK1, STAU2, GA BRG2, DOCK8, TMC1, MAPRE2, USP18, SEMA5A, SYT1, VCL, ARHGAP 44, NTF3, ACER2, NDUFAF2, CD2AP, AURKA, ST18, PYGO1, SLC8A1, HERPUD2, PTPRR, TAFA2, MARCHF1, ABCG8, PLGRKT, ECPAS, KAN K1, MAP4K4, ABCD2, BMPR1B, FMN2, PCSK6, AKAP6, HOMER2, CTNN A2, HADHB, ARNT, RAB8B, PAK3, RFTN1, PDE1A, KCNK10, LARP1, I TPKB, RGS20, PDE10A, UBE2E2, RAP1GDS1, HHAT, RNLS, KICS2, N BN, CUBN, IFT57, INTS7, SUS6, PRKCZ, BTLA, GRB10, RYR3, MSH 6, MCPH1, ARHGAP32, FER1L6, RGS9, HECW1, DEFA3, MRTFA, DUSP 22, YAP1, SEM1, WDR70, PPM1L, SHC4, BRINP1, MAPK1, MGAT5, HR H2, ABCD3, SGTB, USP25, ALCAM, PLG, PAPPA, PDGFD, SYT10, ZNR F3, PPP1R1C, ITGBL1, ARHGEF17, NRG3, UBE2O, NCAM1, GFRA1, S YCP1, NIPBL, SLC16A1, SPIDR, GABPA, MICU1, CORO2B, CARD18, CHD6, STK38, PTPN13, CHN1, HRH4, SORCS3, MYLK3, ACSBG1, GLP 2R, PAFAH1B1, ATF6, EFEMP1, TM7SF3, ITGB8, TLK1, TPM1, NF2, CNKSR2, GRIK4, WDFY4, HIVEP1, CTNNA1, PPP1R9A, MOB3B, BIRC 6, AKAP9, KLF15, RASGRF2, PPARA, MEIS2, NFIB, ERMP1, PRTG, R GL1, SYNJ1, NR5A2, ADAMTS3, TIAM1, ARAP2, GRM1, RSRC1, PTPR K, ARHGEF12, GABRG1, ENAH, PAK5, TRERF1, PCDH11Y, PPP2R5E, PLA2R1, SEMA3C, DAPK1, SLC24A4, SEC14L1, VPS13C, TMEM108, ACSM2B, WDHD1, STK32B, MAGI1, ALPK2, JARID2, SCN2A, RIC8B, SORCS1, DNAJC15, CPE, EVC2, DYSF, IL34, ANK2, TANC1, ADGRV1, MELK, BCAS3, RYR2, BBS2, WNT9B, OR4F6, NKX7, SEMA6D, DUSP1 6, SMARCA4, USP8, PARD3, MAPKAP1, EFTUD2, PIAS1, TBC1D5, SP G21, BLK, TNF, GRM8, DST, CXADR, DOCK4, MBD5, ATRX, NUA1, PT PRT, ELAVL4, ABL1, PTPN12, HDAC4, OXR1, SLC1A1, PRKAA1, GAS 2, KCNH1, ITGB3BP, LRFN5, DROSHA, APBB1IP, APLF, NFAT5, MAS T4, GUCY1A2, SLFN11, RAP1A, MORC1, MYO10, GPC5, CAMK4, INPP 5A, FGF10, ZC3HAV1, GRID2, LATS2, NRG1, INO80D, GSG1L, ASPM, AP3B1, DENND2B, RASGRF1, MUSK, KIR3DL2, ZNF675, GNG7, SMA RCAD1, SH3GL3, PRKCE, FOXK2, NXN, WNK2, ESRRG, DGKB, USP33, DENND4C, CERS6, FBN2, CD44, RGS12, PTPRO, EGF, ABCC9, P2RX6, TRIO, PDE3A, EXT1, NSMAF, LNPEP, LIMD1, SPRED2, RPS6KA3, C TNND2, MARCHF8, ATP8A2, SCG5, MTMR3, PTPN2, TRIM5, PLXNA2, MCF2L, OR4F15, ATXN3, RFC1, HTR2C, CLEC16A, ARHGEF7, CD96, AMBRA1, RFTN2, LTBP1, STK38L, ZFYVE9, PKHD1L1, OPRM1, ABCC 4, HTR2A, BIN2, PLCXD3, FANCM, FANCA, CYBRD1, INPP4B, CNM4, KREMEN1, STAC, SEMA3E, MARK2, GCSAML, GMPR, TMEM67, ALPL, FHL2, ADGRA3, CNIH3, PUM1, TMOD2, MSH2, IGLV2-</p> <p>14, GNAL, EPHA6, ANKRD17, RELL1, HIPK3, EPN2, KCND2, EVC, GR K3, CD163, KNDC1, SPSB4, CLSPN, NOS2, AFG3L2, CPNE4, MOSMO, GFRA2, MNAT1, TMEM116, RBBP8, MDFIC, ADAM12, ANK3, EMILIN2, HMGA2, GBP6, CCND3, BCL11B, VPS41, DOCK5, F5, ECE1, STK32A, IGLV3-</p> |
|--|--|--|----------------------------------------------------------------------------------------------------------------------------------------------------------------------------------------------------------------------------------------------------------------------------------------------------------------------------------------------------------------------------------------------------------------------------------------------------------------------------------------------------------------------------------------------------------------------------------------------------------------------------------------------------------------------------------------------------------------------------------------------------------------------------------------------------------------------------------------------------------------------------------------------------------------------------------------------------------------------------------------------------------------------------------------------------------------------------------------------------------------------------------------------------------------------------------------------------------------------------------------------------------------------------------------------------------------------------------------------------------------------------------------------------------------------------------------------------------------------------------------------------------------------------------------------------------------------------------------------------------------------------------------------------------------------------------------------------------------------------------------------------------------------------------------------------------------------------------------------------------------------------------------------------------------------------------------------------------------------------------------------------------------------------------------------------------------------------------------------------------------------------------------------------------------------------------------------------------------------------------------------------------------------------------------------------------------------------------------------------------------------------------------------------------------------------------------------------------------------------------------------------------------------------------------------------------------------------------------------------------------------------------------------------------------------------------------------------------------------------------------------------------------------------------------------------------------------------------------------------------------------------------------------------------------------------------------------------------------------------------------------------------------------------------------------------------------------------------------------------------------------------------------------------------------------------------------------------------------------------------------------------------------------------------------------------------------------------------------------------------------------------------------------------------------------------------------------------------------------------------------------------------------------------------------------------------------------------------------------------------------------------------------------------------------------------------------------------------------------------------------------------------------------------------------------------------------------------------------------------------------------------------------------------------------------------------------------------------------------------------------------------------------------------------|

|  |  |  |                                                                                                                                                                                                                                                                                                                                                                                                                                                                                                                                                                                                                                                                                                                                                                                                                                                                                                                                                                                                                                                                                                                                                                                                                                                                                                                                                                                                                                                                                                                                                                                                                                                                                                                                                                                                                                                                                                                                                                                                                                                                                                                                                                                                                                                                                                                                                                                                                                                                                                                                                                                                                                                                                                                                                                                                                                                                                                                                                                                                                                                                                                                                                                                                                                                                                                                                                                                                                                                                                                                                                                                                                                                                                                                                                                                                                                           |
|--|--|--|-------------------------------------------------------------------------------------------------------------------------------------------------------------------------------------------------------------------------------------------------------------------------------------------------------------------------------------------------------------------------------------------------------------------------------------------------------------------------------------------------------------------------------------------------------------------------------------------------------------------------------------------------------------------------------------------------------------------------------------------------------------------------------------------------------------------------------------------------------------------------------------------------------------------------------------------------------------------------------------------------------------------------------------------------------------------------------------------------------------------------------------------------------------------------------------------------------------------------------------------------------------------------------------------------------------------------------------------------------------------------------------------------------------------------------------------------------------------------------------------------------------------------------------------------------------------------------------------------------------------------------------------------------------------------------------------------------------------------------------------------------------------------------------------------------------------------------------------------------------------------------------------------------------------------------------------------------------------------------------------------------------------------------------------------------------------------------------------------------------------------------------------------------------------------------------------------------------------------------------------------------------------------------------------------------------------------------------------------------------------------------------------------------------------------------------------------------------------------------------------------------------------------------------------------------------------------------------------------------------------------------------------------------------------------------------------------------------------------------------------------------------------------------------------------------------------------------------------------------------------------------------------------------------------------------------------------------------------------------------------------------------------------------------------------------------------------------------------------------------------------------------------------------------------------------------------------------------------------------------------------------------------------------------------------------------------------------------------------------------------------------------------------------------------------------------------------------------------------------------------------------------------------------------------------------------------------------------------------------------------------------------------------------------------------------------------------------------------------------------------------------------------------------------------------------------------------------------------|
|  |  |  | <p>27, CREM, MBP, PLCE1, TGFA, IL17RA, ANKFN1, HIP1, CRIM1, PRR5L, GSR, CAPN5, VAV1, MSRA, FBXO32, TJP1, LDLRAD4, NPHP4, CNTN1, HLA-B, FKBP5, IQSEC1, SNX3, CACNA1I, BRCA2, DISC1, DNER, BLM, ASB7, WDPCP, NRK, SEMA3A, MAGI3, HSF2BP, ADCY10, PSG8, STRN, AGL, OR9Q1, BMP2, RC3H2, UNC5D, PSG9, CDC42BPB, SOGA1, SCN11A, MSR1, VRK1, GNAI1, RALGAPA2, TBC1D4, RANBP9, TTR, RIN3, BMP2K, TMEM161A, SEMA3D, NETO2, PDE6C, CABIN1, POLR3A, LEMD3, RELN, ARHGAP42, HMGB1, GNAQ, FGF9, NFATC2, SH3BP5, SLC23A2, POLR2M, ZNF106, MYOM1, TRAF3, PRG4, UNC13B, TTC21B, DSTYK, UIMC1, DOCK1, TSPAN2, RAP1GAP, SRGAP2, DRAXIN, ATF1, CCDC186, SLAMF1, SMARCA2, ETS1, FAM83B, GLI3, CGAS, SMARCC1, SNX6, AFF3, SLC9A4, GABRR2, SMOC2, PCP4, CNKSR3, CASP5, GRIK2, IDE, WDR12, MCTP2, CUL1, MYEF2, ZFYVE26, PSD3, GAREM1, LAMC1, NEK10, MOB1B, ATF2, CYLD, UMODL1, BBS4, MAPK8IP1, MX1, PSG6, COL5A1, GABBR2, PSIP1, ITGA9, CFTR, KPNA1, UBASH3A, RGM, NEU3, KITLG, DNAJC7, CAMTA1, UBR1, DCC, CHRM5, MAP4K3, SLC30A10, RCAN1, RORB, CHAF1A, DAB1, SELENON, RB1CC1, MYO3A, AKAP10, PTPRE, PRKN, MTMR2, TBX20, DLGAP2, AFA1, MAPK10, DACH1, PCDH15, DPF3, LYST, NGEF, GRIN2A, ARID5B, TXNRD2, WSB1, USP43, TRPM6, CDH23, LALBA, PRKCH, PKP1, HUNK, TG, IL6R, ALS2, RACGAP1, NLRC5, OR51E1, ACO1, MKNK1, DOCK9, SNX25, DMC1, FBLN5, OSCP1, LCE3B, SHISA9, PDE6A, COPS8, SHANK2, ST8SIA1, MAP7, USP7, VAV3, PSMA1, ENPP3, HAO, IGLV5-45, MESD, SOX30, MOK, KIR2DL4, ARHGEF28, RALB, NPAS2, ADGRG6, ROCK1, LYN, VCAM1, SEL1L, ARHGAP28, ARHGAP31, CTSB, EIF2B3, TLDC2, SLC44A2, GSTA3, SLC15A2, DTX1, TENM2, OVOL2, ZBTB33, ADA2, NTN1, CHKA, PLCB4, ZFHX3, FANCL, DPYSL5, SLC13A5, RRAGD, SUPT16H, ARID1B, CRACR2A, RNF152, OTUD7A, INSR, CUL5, DMBT1, OR7A17, BMF, YTHDF3, TFF1, DEDD2, NEK6, GRID1, SHROOM3, XRCC4, NMU, ARFGEF1, GAST, SNAI2, ASH1L, IGHV3-74, BID, SIAH2, ABCA4, TRABD2B, UFD1, RXRG, ERN2, GABRG3, MBTPS2, FLNB, TRIM58, TIAL1, TOM1, IFI44, PLPP4, NREP, ZDHHC17, NSD2, SH3GLB1, CD9, CARD10, RALGPS2, JCAD, OR4K2, SAMHD1, IFT81, ENPP1, RASGRP1, IGSF11, PXDN, NDRG2, CSNK2A1, BMP5, PWWP3A, KCNC1, CSF1, GHRH, HDGFL3, BCL2L1, SERPINB9, CTDPI, HCN1, PRKG1, LAMA3, ASB4, GRIN2B, ST13, GRB14, INO80, FANCB, GPR156, IGHV2-70D, DHRS3, SMAD5, CELF4, ABCG1, OR4C46, FOXN3, SLC40A1, PRAME, HADHA, TNN, PSAP, MED1, IPCEF1, CDC14B, PCNT, ATRN, IL33, AJAP1, GPRC5C, ROR2, CFH, PPP2R2A, KL, RASGEF1C, BANK1, LMX1A, IL10, ACTR2, OR1L6, SFPQ, PTH, SOSTDC1, PRKAA2, CSF2RB, DIRAS2, TRAV8-6, NDC80, PACRG, ABHD2, ITPRIP, VSTM2A, VASP, PLA2G4A, RAB12, IQGAP1, RPS12, REG4, PRB3, CAMLG, TEAD1, MORC2, SREBF2, YBX3, AIMP1, THNSL2, FYB2, NRXN1, PCID2, HIPK1, DGKK, CD70, YIBAR1, PBLD, FICD, CACYBP, CADM1, PEG10, NET1, SIPA1L2, TWIST1, AKT3, ALKAL2, JAK2, VSX1, RPF2, FSTL1, CHCHD6, ZBTB38, SVEP1, MADD, HCRTR1, PTGS1, CELSR2, PRSS2, FH, TDP1, CREBBP, TNKS, GORAB, PCNA, UFL1, ADAMTS5, NFKBIA, PRKCB, OR2T3, GOT2, ABCC8, TRGJ1, ANXA4, MT1HL1, ZC3H15, ANP32A, RFC2, BRD4, SMPD4, NEDD9, OLFM4, NRBP1, ITGA6, ATP2B1, GAP43, ASS1, GRIP1, IGHV10R15-9, ADGRE3, ADCY9, PPP1R17, CNIH1, MAST2, ERLIN2, OTOF1, CIDEA, ARFGEF3, BBS9, EXT2, EXOC1, KRT6A, SLC6A1, GID8, STAT1, BRMS1L, NDFIP2, NR2C1, MAP2K6, CMTM7, DGKG, SHROOM2, SLC6A11, MARCHF6, MTPN, ABI1, IMPACT, CCBE1, PARK7, ADAMTS18, MAPK8, ITGA4, TOP3A, FBXL17, UBL7, UBE2J2, ADCYAP1R1, MTF2, CSMD1, NCAPG2, TM9SF4, RAPGEF4, OR6C75, ASB2, MYOCD, HMCN1, MYH13, CYFIP2, HNRNPM, ACACA, ASCC2, EFHB, OR13C9, MEF2C, ADGRB1, RXRA, WNT7A, RBPM2, MAP3K5, NDFIP1, IKBIP, MAP3K4, TRIM43B, S100B, TRIM43, ATP6V1C2, C16ORF72, PKN2, RAD51AP1, OR10H2, PDE2A, RAB38, LRR2, SDCBP, NECTIN1, DSG1, JPT2, SPPL2B, NSMCE1, TRAV8-1, WWOX, PASK, NCK1, FGR, CDCA8, PPP2R3A, DNMBP, TRIM23, CXCL2, TOP1, C2, IFNAR1, RNF8, GNG12, EPHA4, CYTH4, GABRA5, MEC</p> |
|--|--|--|-------------------------------------------------------------------------------------------------------------------------------------------------------------------------------------------------------------------------------------------------------------------------------------------------------------------------------------------------------------------------------------------------------------------------------------------------------------------------------------------------------------------------------------------------------------------------------------------------------------------------------------------------------------------------------------------------------------------------------------------------------------------------------------------------------------------------------------------------------------------------------------------------------------------------------------------------------------------------------------------------------------------------------------------------------------------------------------------------------------------------------------------------------------------------------------------------------------------------------------------------------------------------------------------------------------------------------------------------------------------------------------------------------------------------------------------------------------------------------------------------------------------------------------------------------------------------------------------------------------------------------------------------------------------------------------------------------------------------------------------------------------------------------------------------------------------------------------------------------------------------------------------------------------------------------------------------------------------------------------------------------------------------------------------------------------------------------------------------------------------------------------------------------------------------------------------------------------------------------------------------------------------------------------------------------------------------------------------------------------------------------------------------------------------------------------------------------------------------------------------------------------------------------------------------------------------------------------------------------------------------------------------------------------------------------------------------------------------------------------------------------------------------------------------------------------------------------------------------------------------------------------------------------------------------------------------------------------------------------------------------------------------------------------------------------------------------------------------------------------------------------------------------------------------------------------------------------------------------------------------------------------------------------------------------------------------------------------------------------------------------------------------------------------------------------------------------------------------------------------------------------------------------------------------------------------------------------------------------------------------------------------------------------------------------------------------------------------------------------------------------------------------------------------------------------------------------------------------|

|            |                                                                    |                       |                                                                                                                                                                                                                                                                                                                                                                                                                                                                                                                                                                                                                                                                                                                                                                                                                                                                                                                                                                                                                                                                                                                                                                                                                                                                                                                                                                                                                                                                                                                                                                                                                                                                                                                                                                                                                                                                                                                                                                                                                                                                                                                                                                                                                                                                                                   |
|------------|--------------------------------------------------------------------|-----------------------|---------------------------------------------------------------------------------------------------------------------------------------------------------------------------------------------------------------------------------------------------------------------------------------------------------------------------------------------------------------------------------------------------------------------------------------------------------------------------------------------------------------------------------------------------------------------------------------------------------------------------------------------------------------------------------------------------------------------------------------------------------------------------------------------------------------------------------------------------------------------------------------------------------------------------------------------------------------------------------------------------------------------------------------------------------------------------------------------------------------------------------------------------------------------------------------------------------------------------------------------------------------------------------------------------------------------------------------------------------------------------------------------------------------------------------------------------------------------------------------------------------------------------------------------------------------------------------------------------------------------------------------------------------------------------------------------------------------------------------------------------------------------------------------------------------------------------------------------------------------------------------------------------------------------------------------------------------------------------------------------------------------------------------------------------------------------------------------------------------------------------------------------------------------------------------------------------------------------------------------------------------------------------------------------------|
|            |                                                                    |                       | <p>OM, NTRK2, IL1RAPL1, LHX9, ADAMTS9, WNT2B, COLEC12, TNNI1, OCLN, POSTN, CD101, SHISA6, IL17RD, FBXO31, AKAP11, GRIK1, PRKAB1, DTHD1, MVB12B, PTK2, ERP27, MARK4, CDH5, CD5L, TPH2, RCAN2, ANKRD6, APOL2, NFKBID, ARHGAP12, CLDN18, DIAPH1, FEZ2, INIP, LAMB1, DEFB116, APIP, CYFIP1, UBE3A, APOL1, SEMA4D, PITPNC1, MC2R, ZBTB20, FAT4, IMPA2, AKR1B1, C9, WNT5B, RASGEF1B, AMFR, SAXO1, SCARA5, NENF, SH2D1B, PTGFR, ZFYVE1, OR4L1, SANBR, PLCZ1, NOS1AP, MTPP, FCRLA, DIDO1, TPTE, SORBS2, CNKSR1, CCDC88A, GPR55, NSUN2, CHCHD2, SLC5A1, CDC45, OR11G2, BICD1, TNFSF11, FYN, BUB1, PPM1F, ADGRL2, ARL13B, SDE2, RBMS3, HDAC2, SLF1, SH2D3C, DOCK3, ALB, DOK5, IGLV4-3, ZFYVE28, MAPK9, CRTAM, APELA, TRPM3, DEFB108B, ROR1, OPA3, FUT8, TET1, ARNT2, ASB3, CDH2, CNTN5, ITGA8, SEL1L2, FBXL20, RAD9A, PHLPP1, GPR137B, EPHB1, EYS, RP1L1, GRM5, RAI14, RPS6KA5, TBC1D1, LRRC69, PTPRG, PID1, NRP1, SDK1, PRKCA, GBP4, NLRP4, FAIM, SAMD12, FAAP24, FHIT, ITGA1, RNF138, RC3H1, NRIP1, POR, MCC, SUPT3H, BCR, NRXN3, ELMO1, RGS6, RERG, KIF16B, SNRK, C14ORF39, ELP2, FBLN1, STK36, NSG2, MB, RAG1, B9D1, RRAS2, GNA14, BMPER, PRDM15, SRGAP3, MACROH2A1, MITF, EPHB2, CSNK1G1, CD38, EYA4, CDK14, MET, SPPL3, DLG2, CDH17, CDH13, STXBP4, SERPINB2, CACNG3, ATG5, MAGI2, PRDM11, MLIP, FLRT2, MYB, KALRN, SLC1A2, GNAS, LAMA1, MFHAS1, ATRNL1, TIAM2, BMP7, CHIT1, DLG5, GAPVD1, GABRA2, OR2T2, AK3, ZMYND11, TMMEM25, GRM3, ADGRF5, OR4N2, PDGFC, WDR41, PLIN2, PPP1R13B, ABL2, MMP26, RFX2, PARPBP, EYA1, SLIT2, CNOT7, KCTD8, CCDC141, PLCL1, ERBB4, IL20RB, FAM3B, TRHDE, ROBO1, IRAG1, NUF2, PRKCQ, NDRG1, SORCS2, SIPA1L3, TRDN, MGMT, NLGN1, SHLD2, NOS1, SLC6A3, GLDC, ASIC2, EFNA5, TCF12, GAS2L1, ARHGEF11, MTRRX, RAB27A, SLIT3, DTNA, ESR1, MYO9B, CYP2C8, LOXL2, CACNA2D1, NYAP2, IGLC3, IQCJ-SCHIP1, ADGRG7, SKAP2, PRLR, AGO3, HTT, FOXB1, RAD51B, CAMK1D, PIK3R3, MACROD2, HLA-F, FER, EYA2, CCR2, RRGRIPI, STARD13, IGLV3-1, A2M, CHFR, EPS8, OARD1, SEMA4B, IGHV10R21-1, HRH1, GRIA4, IGLV2-18, ROCK2, PRDM1, RORA, STMP1, IL16, DMRT1, CDCA5, PPP1CB, RGS8, RAB31, PDK1, HSPG2, PTPRQ, HERPUD1, NCOA6, HSD17B2, COL4A3, RGS7, KIF7, GNG2, FSTL4, BARD1, PNPLA3, STK3, DEPTOR, ZNF423, RSU1, PNPLA8, HNRNPU, APCDD1, IGF1R, PRKAG2, GLI2, THRB, AKAP13, MORC3, DNMI1L</p> |
| GO:0120035 | regulation of plasma membrane bounded cell projection organization | 3.642566335414852e-18 | <p>MTOR, SPOCK1, PTPRD, LRRC4C, ULK2, RIPOR2, RDX, RP1, RALA, ROBO2, TENM3, SDCCAG8, MINAR1, CDC42EP3, ALK, AUTS2, CARMIL1, NEGR1, MAP4, APC, PLPPR5, DSCAM, CRKL, ARHGAP24, TNIK, MACF1, NEDD4, BCL11A, CDH4, NTRK3, SLC39A12, PRKD1, PAK1, EPHA7, RAPGEF2, ADGRB3, ARSB, SEPTIN9, NEDD4L, STAU2, SEMA5A, ARHGAP44, SRGAP2C, FIG4, KANK1, CTNNA2, PAK3, DIP2B, TRPC5, DNMI3, HECW1, COBL, YAP1, FAT3, CHN1, PAFAH1B1, TIAM1, SEMA3C, BCAS3, SYNE2, SEMA6D, TNFR, ELAVL4, ABL1, HDAC4, SDC2, RAPIA, MYO10, GRID2, CD44, PTPRO, ATP8A2, PLXNA2, ARHGEF7, KRMEEN1, SEMA3E, MARK2, KNDC1, MBP, PLCE1, FUT9, CNTN1, SNX3, PDLIM5, DISC1, WDCP, SEMA3A, SEMA3D, RELN, UST, RAP1GAP, PLS1, NIN, DRAXIN, ATF1, MAP2, CYLD, BBS4, GCC, DAB1, NGEF, TOX, LYN, TENM2, NTN1, DPYSL5, TANC2, BMP5, GRIN2B, TNN, ROR2, ACTR2, MAP6, NRXN1, ANLN, ALKAL2, USH1C, NEDD9, ITGA6, GAP43, DGKG, CEP120, WNT7A, FBXW8, NCK1, EPHA4, NTRK2, IL1RAPL1, OCLN, FBXO31, MARK4, CYFIP1, UBE3A, SEMA4D, SAXO1, CCDC88A, ADAMTS16, FYN, HDAC2, NCS1, ROR1, HECW2, CDH2, PTPRG, NRP1, CHODL, CUX1, EPHB2, CD38, PPFIA2, ATG5, MAGI2, KALRN, TIAM2, BMP7, ABL2, SLIT2, ROBO1, NLGN1, EFNA5, NTNG1, HTT, CAMK1D, FER, EPS8, SEMA4B, CSMD3, WASHC1, FSTL4, IGF1R</p>                                                                                                                                                                                                                                                                                                                                                                                                                                                                                                                                                                                                                                                                                                                                                                                                                                                                                                                                                                                                                                                             |
| GO:0031344 | regulation of cell projection organization                         | 3.707032494821488e-18 | <p>MTOR, SPOCK1, PTPRD, LRRC4C, MYO9A, ULK2, RIPOR2, RDX, RP1, RALA, ROBO2, TENM3, SDCCAG8, MINAR1, CDC42EP3, ALK, AUTS2, CARMIL1, NEGR1, MAP4, APC, PLPPR5, DSCAM, CRKL, ARHGAP24, TNIK, MACF1, NEDD4, BCL11A, CDH4, NTRK3, SLC39A12, PRKD1, PAK1, EPHA7, RAPGEF2, ADGRB3, ARSB, SEPTIN9, NEDD4L, STAU2, SEMA5A, ARHGAP44, SRGAP2C, FIG4, KANK1, CTNNA2, RAB8B, PAK3</p>                                                                                                                                                                                                                                                                                                                                                                                                                                                                                                                                                                                                                                                                                                                                                                                                                                                                                                                                                                                                                                                                                                                                                                                                                                                                                                                                                                                                                                                                                                                                                                                                                                                                                                                                                                                                                                                                                                                         |

|                |                            |                                    |                                                                                                                                                                                                                                                                                                                                                                                                                                                                                                                                                                                                                                                                                                                                                                                                                                                                                                                                                                                                                                                                                                                                                                                                                                                                                                                                                                                                                                                                                                                                                                                                                                                                                                                                                                                                                                                                                                                                                                                                                                                                                                                                                                                                                                                                                                                                                                                                                                                                                                                                                                                                                                                                                                                                                                                                                                                                                                                   |
|----------------|----------------------------|------------------------------------|-------------------------------------------------------------------------------------------------------------------------------------------------------------------------------------------------------------------------------------------------------------------------------------------------------------------------------------------------------------------------------------------------------------------------------------------------------------------------------------------------------------------------------------------------------------------------------------------------------------------------------------------------------------------------------------------------------------------------------------------------------------------------------------------------------------------------------------------------------------------------------------------------------------------------------------------------------------------------------------------------------------------------------------------------------------------------------------------------------------------------------------------------------------------------------------------------------------------------------------------------------------------------------------------------------------------------------------------------------------------------------------------------------------------------------------------------------------------------------------------------------------------------------------------------------------------------------------------------------------------------------------------------------------------------------------------------------------------------------------------------------------------------------------------------------------------------------------------------------------------------------------------------------------------------------------------------------------------------------------------------------------------------------------------------------------------------------------------------------------------------------------------------------------------------------------------------------------------------------------------------------------------------------------------------------------------------------------------------------------------------------------------------------------------------------------------------------------------------------------------------------------------------------------------------------------------------------------------------------------------------------------------------------------------------------------------------------------------------------------------------------------------------------------------------------------------------------------------------------------------------------------------------------------------|
|                |                            |                                    | ,DIP2B,TRPC5,DNM3,HECW1,COBL,YAP1,FAT3,CHN1,PAFAH1B1,TIAM1,SEMA3C,BCAS3,SYNE2,SEMA6D,TNR,ELAVL4,ABL1,H<br>DAC4,SDC2,RAP1A,MYO10,GRID2,CD44,PTPRO,ATP8A2,PLXNA<br>2,ARHGEF7,KREMEN1,SEMA3E,MARK2,KNDC1,MBP,PLCE1,FUT9<br>,CNTN1,SNX3,PDLIM5,DISC1,WDPCP,SEMA3A,SEMA3D,RELN,U<br>ST,RAP1GAP,PLS1,NIN,DRAXIN,ATF1,MAP2,CYLD,BBS4,DCC,<br>DAB1,NGEF,TOX,LYN,TENM2,NTN1,DPYSL5,TANC2,BMP5,GRIN<br>2B,TNN,ROR2,ACTR2,MAP6,NRXN1,ANLN,ALKAL2,USH1C,NEDD<br>9,ITGA6,GAP43,GRIP1,DGKG,CEP120,WNT7A,FBXW8,NCK1,EP<br>HA4,NTRK2,IL1RAPL1,OCLN,FBXO31,MARK4,CYFIP1,UBE3A,S<br>EMA4D,SAXO1,CCDC88A,ADAMTS16,FYN,HDAC2,NCS1,ROR1,HE<br>CW2,CDH2,PTPRG,NRP1,CHODL,CUX1,EPHB2,CD38,PPFIA2,AT<br>G5,MAGI2,KALRN,TIAM2,BMP7,ABL2,SLIT2,ROBO1,NLGN1,EF<br>NA5,NTNG1,HTT,CAMK1D,FER,EPS8,SEMA4B,CSMD3,WASHC1,F<br>STL4,IGF1R                                                                                                                                                                                                                                                                                                                                                                                                                                                                                                                                                                                                                                                                                                                                                                                                                                                                                                                                                                                                                                                                                                                                                                                                                                                                                                                                                                                                                                                                                                                                                                                                                                                                                                                                                                                                                                                                                                                                                                                                                                                                                                          |
| GO:00<br>07165 | signal<br>transducti<br>on | 5.23567<br>4510414<br>1425e-<br>18 | NOTCH2,BCAR3,MTOR,NSG1,SGCD,WWC1,GARNL3,LRP12,PTPRD<br>,SLC24A2,ANKS1B,MYO9A,ULK2,NLK,KSR1,PLCB1,ZNF536,TA<br>FA5,TENM4,DLC1,ZDHHC21,PTPRA,ITPR2,RIPOR2,PDE4D,RDX<br>,RP1,ERC1,RALA,IL1RAPL2,BCL2,PRDM16,ALDH1A2,ARHGAP2<br>6,FBN1,CHRNA7,DCDC1,GPR158,ROBO2,RIMS1,PIK3C3,TENM3<br>,GABRB3,ZEB1,AKR1C3,RARB,FGD4,SPRED1,ENPEP,MYO1E,PL<br>PPR1,MINAR1,CDC42EP3,RIMS2,ALK,AUTS2,ADGRE1,MCTP1,P<br>JA2,BABAM2,ERBIN,RHPN2,RIN2,ANO6,CACNG2,DLGAP1,MLLT<br>3,GPC6,MAP3K9,APC,HHLA2,PLPPR5,DSCAM,CRKL,ERG,ARHGA<br>P24,TNIK,PTPRJ,KDM4C,DOCK10,EGFR,DENND1A,ANGPT1,MAC<br>F1,PRKACB,RGS3,NCOR1,RNF220,DOCK2,NEDD4,MAML2,SCAI,<br>FAM83F,SGMS1,GRIK3,CHSY1,NTRK3,RXFP1,C5,PDE1C,ZFAND<br>6,DKK2,FLT1,RABEP1,MAPKBP1,GABRB1,DGKI,INVS,EDAR,GR<br>IA1,NEO1,CNTN6,SLC39A12,SLC8A3,TOM1L2,PRKD1,TPTE2,P<br>AK1,GMDS,EPHA7,CTNNAL1,CHRM3,RALGPS1,SPEN,RAPGEF2,P<br>ELI2,LRP2,ADGRB3,RUNX2,FGF12,GABRA6,TAOK3,ONECUT1,C<br>PEB4,TMEM38B,PRICKLE2,TAFA4,BTBD11,CCL28,PATJ,GRM7,<br>RPTOR,TMEM117,GHR,COL4A2,RALGAPA1,RAPGEF5,PPP1R12B,<br>TRPM1,ADAM10,IL1R1,APBB2,APP,RPS6KA2,CACNA1C,DCLK1,<br>GABRG2,DOCK8,MAPRE2,USP18,SEMA5A,ARHGAP44,NTF3,ACER<br>2,CD2AP,AURKA,ST18,PYG01,SLC8A1,HERPUD2,PTPRR,TAFA2<br>,ABCG8,KANK1,MAP4K4,BMPR1B,FMN2,PCSK6,AKAP6,HOMER2,<br>ARNT,PAK3,RFTN1,PDE1A,KCNK10,LARP1,ITPKB,RGS20,PDE1<br>0A,RAP1GDS1,HHAT,KICS2,NBN,IFT57,INTS7,PRKC2,BTLA,G<br>RB10,MSH6,ARHGAP32,RGS9,HECW1,DEFA3,DUSP22,YAP1,PPM<br>1L,SHC4,MAPK1,MGAT5,HRH2,ALCAM,PDGFD,ZNRF3,PPP1R1C,<br>ITGBL1,ARHGEF17,NRG3,UBE20,NCAM1,GFRA1,STK38,PTPN13<br>,CHN1,HRH4,SORCS3,GLP2R,PAFAH1B1,ATF6,EFEMP1,ITGB8,<br>TLK1,NF2,CNKSR2,GRIK4,HIVEP1,CTNNA1,PPP1R9A,MOB3B,B<br>IRC6,AKAP9,KLF15,RASGRF2,PPARA,ERMP1,RGL1,NR5A2,ADA<br>MTS3,TIAM1,ARAP2,GRM1,PTPRK,ARHGEF12,GABRG1,PAK5,TR<br>ERF1,PCDH11Y,PPP2R5E,PLA2R1,SEMA3C,DAPK1,SLC24A4,SE<br>C14L1,TMEM108,STK32B,MAGI1,ALPK2,SCN2A,RIC8B,SORCS1<br>,CPE,EVC2,IL34,ANK2,ADGRV1,MELK,RYR2,BBS2,WNT9B,OR4<br>F6,NKG7,SEMA6D,DUSP16,SMARCA4,USP8,PARD3,MAPKAP1,PI<br>AS1,SPG21,BLK,GRM8,DST,DOCK4,MBD5,ATRX,NUAK1,PTPRT,<br>ABL1,PTPN12,HDAC4,SLC1A1,PRKAA1,GAS2,KCNH1,ITGB3BP,<br>APBB1IP,APLF,NFAT5,MAST4,GUCY1A2,RAP1A,MYO10,GPC5,C<br>AMK4,INPP5A,FGF10,ZC3HAV1,GRID2,LATS2,NRG1,GSG1L,AS<br>PM,AP3B1,DENND2B,RASGRF1,MUSK,ZNF675,GNG7,SH3GL3,PR<br>KCE,NXN,WNK2,ESRRG,DGKB,USP33,DENND4C,FBN2,CD44,RGS<br>12,PTPRO,EGF,P2RX6,TRIO,PDE3A,EXT1,NSMAF,LNPEP,LIMD<br>1,SPRED2,RPS6KA3,CTNND2,SCG5,PTPN2,TRIM5,PLXNA2,MCF<br>2L,OR4F15,HTR2C,CLEC16A,ARHGEF7,LTBP1,STK38L,ZFYVE9<br>,OPRM1,HTR2A,PLCXD3,FANCA,INPP4B,KREMEN1,STAC,SEMA3<br>E,MARK2,GCSAML,FHL2,ADGRA3,CNIH3,PUM1,TMOD2,MSH2,GN<br>AL,EPHA6,ANKRD17,RELL1,HIPK3,EPN2,EVC,GRK3,KNDC1,SP<br>SB4,CLSPN,NOS2,MOSMO,GFRA2,TMEM116,RBBP8,MDFIC,ADAM<br>12,ANK3,HMGA2,CCND3,DOCK5,ECE1,STK32A,CREM,MBP,PLCE<br>1,TGFA,IL17RA,HIP1,CRIM1,PRR5L,CAPN5,VAV1,LDLRAD4,N<br>PHP4,CNTN1,IQSEC1,SNX3,CACNA1I,BCRA2,DISC1,DNER,BLM |

|  |  |  |                                                                                                                                                                                                                                                                                                                                                                                                                                                                                                                                                                                                                                                                                                                                                                                                                                                                                                                                                                                                                                                                                                                                                                                                                                                                                                                                                                                                                                                                                                                                                                                                                                                                                                                                                                                                                                                                                                                                                                                                                                                                                                                                                                                                                                                                                                                                                                                                                                                                                                                                                                                                                                                                                                                                                                                                                                                                                                                                                                                                                                                                                                                                                                                                                                                                                                                                                                                                                                                                                                                                                                                                                                                                                                                                                                                                                                                                                                                                                     |
|--|--|--|-----------------------------------------------------------------------------------------------------------------------------------------------------------------------------------------------------------------------------------------------------------------------------------------------------------------------------------------------------------------------------------------------------------------------------------------------------------------------------------------------------------------------------------------------------------------------------------------------------------------------------------------------------------------------------------------------------------------------------------------------------------------------------------------------------------------------------------------------------------------------------------------------------------------------------------------------------------------------------------------------------------------------------------------------------------------------------------------------------------------------------------------------------------------------------------------------------------------------------------------------------------------------------------------------------------------------------------------------------------------------------------------------------------------------------------------------------------------------------------------------------------------------------------------------------------------------------------------------------------------------------------------------------------------------------------------------------------------------------------------------------------------------------------------------------------------------------------------------------------------------------------------------------------------------------------------------------------------------------------------------------------------------------------------------------------------------------------------------------------------------------------------------------------------------------------------------------------------------------------------------------------------------------------------------------------------------------------------------------------------------------------------------------------------------------------------------------------------------------------------------------------------------------------------------------------------------------------------------------------------------------------------------------------------------------------------------------------------------------------------------------------------------------------------------------------------------------------------------------------------------------------------------------------------------------------------------------------------------------------------------------------------------------------------------------------------------------------------------------------------------------------------------------------------------------------------------------------------------------------------------------------------------------------------------------------------------------------------------------------------------------------------------------------------------------------------------------------------------------------------------------------------------------------------------------------------------------------------------------------------------------------------------------------------------------------------------------------------------------------------------------------------------------------------------------------------------------------------------------------------------------------------------------------------------------------------------------|
|  |  |  | <p>, ASB7, WDPCP, NRK, SEMA3A, MAGI3, ADCY10, PSG8, STRN, OR9Q1, BMP2, RC3H2, UNC5D, PSG9, CDC42BPB, SOGA1, VRK1, GNAI1, RALGAP2, RANBP9, TTR, RIN3, BMP2K, TMEM161A, SEMA3D, NETO2, PDE6C, CABIN1, LEMD3, RELN, ARHGAP42, HMGB1, GNAQ, FGF9, NFATC2, SH3BP5, POLR2M, ZNF106, MYOM1, TRAF3, UNC13B, TTC21B, DSTYK, UIMC1, DOCK1, RAP1GAP, SRGAP2, DRAXIN, ATF1, SLAMF1, FAM83B, GLI3, CGAS, SMARCC1, SNX6, GABRR2, SMOC2, PCP4, CNKSR3, CASP5, GRIK2, IDE, WDR12, MCTP2, CUL1, PSD3, GAREM1, LAMC1, NEK10, MOB1B, ATF2, CYLD, BBS4, MAPK8IP1, MX1, PSG6, GABBR2, ITGA9, KPNA1, UBASH3A, RGMB, NEU3, KITLG, CAMTA1, UBR1, DCC, CHRM5, MAP4K3, SLC30A10, RCAN1, RORB, DAB1, RB1CC1, AKAP10, PTPRE, PRKN, MTMR2, TBX20, DLGAP2, AFAP1, MAPK10, NGEF, GRIN2A, ARID5B, WSB1, LALBA, PRKCH, PKP1, HUNK, TG, IL6R, ALS2, RACGAP1, NLRC5, OR51E1, MKNK1, DOCK9, SNX25, SHISA9, PDE6A, COPS8, SHANK2, USP7, VAV3, MESD, SOX30, MOK, KIR2DL4, ARHGEF28, RALB, ADGRG6, ROCK1, LYN, VCAM1, SEL1L, ARHGAP28, ARHGAP31, EIF2B3, SLC44A2, SLC15A2, DTX1, TENM2, OVOL2, ZBTB33, ADA2, NTN1, PLCB4, DPYSL5, RAGD, CRACR2A, RNF152, OTUD7A, INSR, CUL5, OR7A17, BMF, YTHDF3, TFF1, DEDD2, NEK6, GRID1, NMU, ARFGEF1, GAST, SNAI2, ASH1L, IGHV3-74, BID, SIAH2, ABCA4, TRABD2B, UFD1, RXRG, ERN2, GABRG3, MBTPS2, FLNB, TIAL1, TOM1, PLPP4, NREP, ZDHHC17, CARD10, RALGPS2, JCAD, OR4K2, SAMHD1, IFT81, ENPP1, RASGRP1, IGSF11, NDRG2, CSNK2A1, BMP5, CSF1, GHRH, HDGFL3, BCL2L1, PRKG1, LAMA3, ASB4, GRIN2B, GRB14, GPR156, IGHV2-70D, DHRS3, SMAD5, CELF4, OR4C46, FOXN3, PRAME, TNN, PSAP, MED1, CDC14B, PCNT, IL33, GPRC5C, ROR2, KL, RASGEF1C, BANK1, IL10, OR1L6, SFPQ, PTH, SOSTDC1, PRKAA2, CSF2RB, DIRAS2, NDC80, ABHD2, ITPRIP, RAB12, IQGAP1, RPS12, CAMLG, TEAD1, SREBF2, YBX3, AIMP1, THNSL2, FYB2, NRXN1, PCID2, HIPK1, DGKK, CD70, CIBAR1, PBLD, FICD, PEG10, NET1, SIPA1L2, TWIST1, AKT3, ALKAL2, JAK2, RPF2, FSTL1, SVEP1, MADD, HCRT1, CELSR2, CREBBP, TNKS, GORAB, UFL1, NFKBIA, PRKCB, OR2T3, ANXA4, ZC3H15, ANP32A, BRD4, NEDD9, OLFM4, NRBP1, ITGA6, GAP43, GRIP1, IGHV10R15-9, ADGRE3, ADCY9, PPP1R17, CNIH1, MAST2, ERLIN2, OTOP1, CIDEA, ARFGEF3, EXT2, EXOC1, GID8, STAT1, BRMS1L, NDFIP2, NR2C1, MAP2K6, CMTM7, DGKG, ABI1, CCBE1, PARK7, ADAMTS18, MAPK8, ITGA4, FBXL17, ADCYAP1R1, NCAPG2, RAPGEF4, OR6C75, ASB2, MYOCD, CYFIP2, EFHB, OR13C9, MEF2C, ADGRB1, RXRA, WNT7A, RBMS2, MAP3K5, NDFIP1, MAP3K4, S100B, ATP6V1C2, C16ORF72, PKN2, OR10H2, PDE2A, RAB38, LRRC2, SDCBP, JPT2, SPPL2B, WWOX, PASK, NCK1, FGR, CDCA8, PPP2R3A, DNMBP, CXCL2, IFNAR1, GNG12, EPHA4, CYTH4, GABRA5, MECOM, NTRK2, IL1RAPL1, WNT2B, COLEC12, POSTN, CD101, SHISA6, IL17RD, FBXO31, AKAP11, GRIK1, PRKAB1, DTHD1, MVB12B, PTK2, MARK4, CDH5, RCAN2, ANKRD6, NFKBID, ARHGAP12, CLDN18, FEZ2, INIP, LAMB1, APIP, CYFIP1, UBE3A, SEMA4D, PITPNC1, MC2R, FAT4, IMPA2, WNT5B, RASGEF1B, AMFR, NENF, PTGFR, OR4L1, PLCZ1, NOS1AP, FCRLA, DIDO1, TPTE, SORBS2, CNKSR1, CCDC88A, GPR55, NSUN2, CDC45, OR11G2, BICD1, TNFSF11, FYN, BUB1, PPM1F, ADGRL2, ARL13B, SDE2, RBMS3, HDAC2, SH2D3C, DOCK3, DOK5, ZFYVE28, MAPK9, APELA, ROR1, FUT8, TET1, ASB3, CDH2, ITGA8, RAD9A, PHLPP1, GPR137B, EPHB1, RP1L1, GRM5, RAI14, RPS6KA5, LRRC69, PTPRG, PID1, NRP1, PRKCA, FAIM, SAMD12, FHIT, ITGA1, RNF138, RC3H1, POR, MCC, BCR, NRXN3, ELMO1, RGS6, RERG, KIF16B, SNRK, ELP2, FBLN1, STK36, NSG2, B9D1, RRAS2, GNA14, BMPER, PRDM15, SRGAP3, MITF, EPHB2, CSNK1G1, CD38, EYA4, CDK14, MET, SPPL3, CDH17, CDH13, STXB4, CACNG3, MAGI2, PRDM11, FLRT2, KALRN, GNAS, LAMA1, MFHAS1, ATRNL1, TIAM2, BMP7, DLG5, GAPVD1, GABRA2, OR2T2, ZMYND11, TMEM25, GRM3, ADGRF5, OR4N2, PDGFC, PPP1R13B, ABL2, EYA1, SLIT2, CNOT7, KCTD8, PLCL1, ERBB4, IL20RB, FAM3B, TRHDE, ROBO1, IRAG1, NUF2, PRKCQ, NDRG1, SORCS2, SIPA1L3, NLGN1, NOS1, ASIC2, EFNA5, ARHGEF11, SLIT3, DTNA, ESR1, MYO9B, NYAP2, IGLC3, IQCJ-SCHIP1, ADGRG7, SKAP2, PRLR, AGO3, HTT, PIK3R3, FER, EYA2, C</p> |
|--|--|--|-----------------------------------------------------------------------------------------------------------------------------------------------------------------------------------------------------------------------------------------------------------------------------------------------------------------------------------------------------------------------------------------------------------------------------------------------------------------------------------------------------------------------------------------------------------------------------------------------------------------------------------------------------------------------------------------------------------------------------------------------------------------------------------------------------------------------------------------------------------------------------------------------------------------------------------------------------------------------------------------------------------------------------------------------------------------------------------------------------------------------------------------------------------------------------------------------------------------------------------------------------------------------------------------------------------------------------------------------------------------------------------------------------------------------------------------------------------------------------------------------------------------------------------------------------------------------------------------------------------------------------------------------------------------------------------------------------------------------------------------------------------------------------------------------------------------------------------------------------------------------------------------------------------------------------------------------------------------------------------------------------------------------------------------------------------------------------------------------------------------------------------------------------------------------------------------------------------------------------------------------------------------------------------------------------------------------------------------------------------------------------------------------------------------------------------------------------------------------------------------------------------------------------------------------------------------------------------------------------------------------------------------------------------------------------------------------------------------------------------------------------------------------------------------------------------------------------------------------------------------------------------------------------------------------------------------------------------------------------------------------------------------------------------------------------------------------------------------------------------------------------------------------------------------------------------------------------------------------------------------------------------------------------------------------------------------------------------------------------------------------------------------------------------------------------------------------------------------------------------------------------------------------------------------------------------------------------------------------------------------------------------------------------------------------------------------------------------------------------------------------------------------------------------------------------------------------------------------------------------------------------------------------------------------------------------------------------|

|            |                                     |                        |                                                                                                                                                                                                                                                                                                                                                                                                                                                                                                                                                                                                                                                                                                                                                                                                                                                                                                                                                                                                                                                                                                                                                                                                                                                                                                                                                                                                                                                                                                                                                                                                                                                                                                                                                                                                                                                                                                                                                                                                                                                                                                                                                                                                                                                                                                                                                                                                                                                                                                                                                                                                                                                                                                                                                                                                                                                                                                                                                                                  |
|------------|-------------------------------------|------------------------|----------------------------------------------------------------------------------------------------------------------------------------------------------------------------------------------------------------------------------------------------------------------------------------------------------------------------------------------------------------------------------------------------------------------------------------------------------------------------------------------------------------------------------------------------------------------------------------------------------------------------------------------------------------------------------------------------------------------------------------------------------------------------------------------------------------------------------------------------------------------------------------------------------------------------------------------------------------------------------------------------------------------------------------------------------------------------------------------------------------------------------------------------------------------------------------------------------------------------------------------------------------------------------------------------------------------------------------------------------------------------------------------------------------------------------------------------------------------------------------------------------------------------------------------------------------------------------------------------------------------------------------------------------------------------------------------------------------------------------------------------------------------------------------------------------------------------------------------------------------------------------------------------------------------------------------------------------------------------------------------------------------------------------------------------------------------------------------------------------------------------------------------------------------------------------------------------------------------------------------------------------------------------------------------------------------------------------------------------------------------------------------------------------------------------------------------------------------------------------------------------------------------------------------------------------------------------------------------------------------------------------------------------------------------------------------------------------------------------------------------------------------------------------------------------------------------------------------------------------------------------------------------------------------------------------------------------------------------------------|
|            |                                     |                        | CR2,STARD13,CHFR,EPS8,SEMA4B,IGHV10R21-1,HRH1,GRIA4,ROCK2,RORA,IL16,DMRT1,PPP1CB,RGS8,PKD1,HERPUD1,COL4A3,RGS7,KIF7,GNG2,FSTL4,BARD1,STK3,DEPTOR,ZNF423,RSU1,APCDD1,IGF1R,PRKAG2,GLI2,THRB,AKAP13,DNM1L                                                                                                                                                                                                                                                                                                                                                                                                                                                                                                                                                                                                                                                                                                                                                                                                                                                                                                                                                                                                                                                                                                                                                                                                                                                                                                                                                                                                                                                                                                                                                                                                                                                                                                                                                                                                                                                                                                                                                                                                                                                                                                                                                                                                                                                                                                                                                                                                                                                                                                                                                                                                                                                                                                                                                                          |
| GO:0050793 | regulation of developmental process | 1.4041104956020207e-17 | NOTCH2,BRINP3,MTOR,CNTN4,WWC1,PTPRD,LRRRC4C,SMOC1,MYO9A,ULK2,FTO,PLCB1,ZNF536,TAF4A5,ZFPM2,TENM4,DLC1,ZDHHC21,RIPOR2,RDX,RALA,BCL2,FBN1,CHRNA7,ROBO2,RIMS1,SPIRE1,ZEB1,RARB,FGD4,SPRED1,USH2A,MINAR1,CDC42EP3,RIMS2,ALK,FOXJ2,CARMIL1,RIN2,PARVB,ANO6,MLLT3,GPC6,APC,ZMYM4,DSCAM,TCF4,CRKL,SOX5,TNIK,KDM4C,EGFR,RFX3,CDK12,MACF1,NEDD4,BCL11A,SOX6,TMEM182,CDH4,NTRK3,C5,FLT1,SLC39A12,PRKD1,PAK1,EPHA7,SPEN,RAPGEF2,LRP2,ADGRB3,RUNX2,PRICKLE2,GHR,EPB41L3,COL4A2,SSBP3,NEDD4L,ADAM10,HDAC9,ZHX3,APP,STAU2,SEMA5A,SYT1,VCL,ARHGAP44,NTF3,AURKA,CFDP1,SLC8A1,SRGAP2C,FIG4,KANK1,BMPRI1B,AKAP6,ARNT,PAK3,DIP2B,ITPKB,TRPC5,DNM3,PRKCZ,HECW1,ABCA5,COBL,YAP1,BRINP1,MAPK1,ZNRF3,NIPBL,GABPA,FAT3,CHN1,MYLK3,PAFAH1B1,EFEMP1,ITGB8,TPM1,NF2,RBFOX1,CTNNA1,PPARA,MEIS2,NFIB,MRTFB,PRTG,SYNJ1,TIAM1,SEMA3C,AGO2,ALPK2,JARID2,GATAD2B,IL34,BRWD1,ADGRV1,BBS2,WNT9B,RANBP3L,SEMA6D,SMARCA4,PARD3,TNR,CXADR,MBD5,ELAVL4,ABL1,HDAC4,PRKAA1,SDC2,GAS2,DROSHA,RAP1A,GLIS1,MYO10,CAMK4,FGF10,GRID2,LATS2,NRG1,INO80D,ASPM,AP3B1,ATP11C,ZBTB16,MUSK,ZNF675,SH3GL3,FBN2,CD44,EGF,TRIO,PDE3A,LIMD1,SPRED2,RPS6KA3,ATP8A2,PTPN2,PLXNA2,HTR2C,ARHGEF7,AMBRA1,OPRM1,HTR2A,FANCA,KREMEN1,SEMA3E,MARK2,MSH2,ANKRD17,LINGO2,SH3KBP1,LUC7L,EPN2,KNDC1,BICRAL,AFG3L2,MOSMO,ADAM12,EMILIN2,HMGA2,BCL11B,DOCK5,MBP,TRPS1,CRIM1,TJP1,LDLRAD4,HLA-B,PDLIM5,DISC1,WPCP,SEMA3A,BMP2,RC3H2,PSG9,MSR1,GFII1B,BMP2K,SEMA3D,RELN,HMGB1,FGF9,NFATC2,UST,SLC23A2,ANKRD26,ESRP1,DOCK1,RAP1GAP,PLS1,NIN,DRAXIN,SMARCA2,ETS1,GLI3,SMARCC1,SMOC2,PCP4,MAP2,LAMC1,ATF2,UMODL1,BBS4,COL5A1,CFTR,NELL1,KITLG,DCC,GTFT2I,RORB,TADA2A,DAB1,PRKN,MTMR2,TBX20,DPF3,NGEF,PRKCH,TG,IL6R,RACGAP1,HEMGN,TOX,ITSN2,ROCK1,LYN,PLEKHB2,DTX1,OVOL2,NTN1,ZFHX3,DPYSL5,ARID1B,CASZ1,INSR,SHROOM3,COLQ,DDHD1,SNAI2,TANC2,RXRG,TRIM58,NREP,NSD2,JCAD,TWIST2,ENPP1,RASGRP1,BMP5,CSF1,GHRH,BCL2L1,CTDP1,LAMA3,ASB4,INO80,CNMD,SMAD5,CELF4,ABCG1,PRAME,MYCL,TNN,MED1,ATRNL,IL33,AJAP1,ROR2,KL,LMX1A,TMEM178A,IL10,ACTR2,PRAMEF25,CLSTN2,PTH,SOSTDC1,VSTM2A,MAP6,PALMD,ZBTB7C,ANP32B,YBX3,NRXN1,PCID2,HIPK1,TWIST1,AKT3,JAK2,RBM19,CELSR2,MELTF,UFL1,NFKBIA,PRKCB,ABCC8,NEDD9,OLFM4,ATP2B1,GRIP1,AGO1,STAT1,BRMS1L,DGKG,MTPN,PRAMEF2,IMPACT,CCBE1,MYOCD,MEF2C,ADGRB1,RXRA,WNT7A,RBPMS2,MAP3K5,NDFIP1,WASF3,FOXO6,FBXW8,SDCBP,FLVCR1,FGR,DNMBP,EPHA4,NTRK2,IL1RAPL1,NUMB,ADAMTS9,WNT2B,CD101,MEGF10,IL17RD,FBXO31,PTK2,CDH5,ANKRD6,NFKBID,CLDN18,DIAPH1,LAMB1,CYFIP1,UBE3A,SEMA4D,JAM2,FAT4,RUNX1,WNT5B,ASAP1,PDCL3,GPR55,NSUN2,TNFSF11,HYCN,MYL12B,ADGRL2,HDAC2,MAPK9,CRTAM,APELA,ROR1,TET1,HECW2,CDH2,NTN4,GPR137B,EPHB1,GRM5,ADCK1,PID1,NRP1,SDK1,PRKCA,FAIM,RC3H1,CHODL,POR,BCR,FBLN1,RAG1,BMPER,CUX1,MACROH2A1,MITF,EPHB2,PPFIA2,MAGI2,FAM171A1,FLRT2,MYB,KALRN,GNAS,LAMA1,TIAM2,BMP7,DLG5,NUDT21,DDX6,EYA1,SLIT2,ERBB4,SYNDIG1,ROBO1,PBX1,NLGN1,SHLD2,SLC6A3,ASIC2,EFNA5,TCF12,EHMT1,ESR1,NTNG1,LOXL2,PRLR,CAMK1D,CCR2,EPS8,SEMA4B,ROCK2,PRDM1,RORA,ATAT1,DMRT1,HSPG2,CSMD3,COL4A3,HOKK3,FSTL4,STK3,HNRNPU,APCDD1,IGF1R,GLI2,ATP10A,DNM1L |
| GO:0048523 | negative regulation of              | 1.5141643934514607e-   | NOTCH2,BRINP3,MTOR,CNTN4,SPOCK1,WWC1,PTPRD,SLC24A2,ULK2,NLK,FTO,PLCB1,ZNF536,TAF4A5,SVIL,ZFPM2,L3MBTL4,DLC1,TNRC6B,ITPR2,RIPOR2,PDE4D,RDX,STXBP1,BCL2,PRDM16,ALDH1A2,FBN1,CHRNA7,ROBO2,ZEB1,AKR1C3,RARB,SPRED                                                                                                                                                                                                                                                                                                                                                                                                                                                                                                                                                                                                                                                                                                                                                                                                                                                                                                                                                                                                                                                                                                                                                                                                                                                                                                                                                                                                                                                                                                                                                                                                                                                                                                                                                                                                                                                                                                                                                                                                                                                                                                                                                                                                                                                                                                                                                                                                                                                                                                                                                                                                                                                                                                                                                                    |

|  |                  |    |                                                                                                                                                                                                                                                                                                                                                                                                                                                                                                                                                                                                                                                                                                                                                                                                                                                                                                                                                                                                                                                                                                                                                                                                                                                                                                                                                                                                                                                                                                                                                                                                                                                                                                                                                                                                                                                                                                                                                                                                                                                                                                                                                                                                                                                                                                                                                                                                                                                                                                                                                                                                                                                                                                                                                                                                                                                                                                                                                                                                                                                                                                                                                                                                                                                                                                                                                                                                                                                                                                 |
|--|------------------|----|-------------------------------------------------------------------------------------------------------------------------------------------------------------------------------------------------------------------------------------------------------------------------------------------------------------------------------------------------------------------------------------------------------------------------------------------------------------------------------------------------------------------------------------------------------------------------------------------------------------------------------------------------------------------------------------------------------------------------------------------------------------------------------------------------------------------------------------------------------------------------------------------------------------------------------------------------------------------------------------------------------------------------------------------------------------------------------------------------------------------------------------------------------------------------------------------------------------------------------------------------------------------------------------------------------------------------------------------------------------------------------------------------------------------------------------------------------------------------------------------------------------------------------------------------------------------------------------------------------------------------------------------------------------------------------------------------------------------------------------------------------------------------------------------------------------------------------------------------------------------------------------------------------------------------------------------------------------------------------------------------------------------------------------------------------------------------------------------------------------------------------------------------------------------------------------------------------------------------------------------------------------------------------------------------------------------------------------------------------------------------------------------------------------------------------------------------------------------------------------------------------------------------------------------------------------------------------------------------------------------------------------------------------------------------------------------------------------------------------------------------------------------------------------------------------------------------------------------------------------------------------------------------------------------------------------------------------------------------------------------------------------------------------------------------------------------------------------------------------------------------------------------------------------------------------------------------------------------------------------------------------------------------------------------------------------------------------------------------------------------------------------------------------------------------------------------------------------------------------------------------|
|  | cellular process | 17 | <p>1,USH2A,MINAR1,FOXJ2,CDYL2,CARMIL1,MCTP1,BABAM2,GLIS3,FANK1,ERBIN,RHPN2,MLLT3,MAP4,SPON1,APC,TSHZ3,DSCAM,RTN1,CRKL,ILDR2,ARHGAP24,PTPRJ,KDM4C,EGFR,RFX3,USP14,ANGPT1,CDK12,BACH1,PRKACB,RGS3,NCOR1,NEDD4,SCAI,BCL11A,SOX6,TMEM182,GRIK3,NTRK3,C5,ZFAND6,DKK2,FLT1,THRAP3,MAPKBP1,DGKI,INVS,GRIA1,CRACD,CAST,SLC8A3,MALRD1,TOM1L2,PRKD1,TPTE2,PAK1,EPHA7,NCOA7,SPEN,RA,PGEF2,LRP2,RUNX2,TAOK3,ONECUT1,CPEB4,TMEM38B,LDB2,CL28,SMYD3,GRM7,RETREG1,RPTOR,GHR,THADA,TBCD,NEDD4L,ADAM10,HDAC9,ZHX3,ATF7IP,APBB2,APP,RPS6KA2,SAMSN1,CACNA1C,KDM1B,DCLK1,STAU2,DOCK8,USP18,SEMA5A,VCL,ARHGAP44,NTF3,ACER2,PARP15,NDUFAF2,CD2AP,AURKA,PARN,CFDP1,ST18,SLC8A1,PTPRR,SRGAP2C,FIG4,DUX4,SRGAP2B,KANK1,KCNE4,MAP4K4,ABCD2,BMPRI1B,FMN2,AKAP6,HOMER2,CTNNA2,DIP2B,LARP1,ITPKB,TRPC5,RGS20,PDE10A,KICS2,DNM3,NBN,IFT57,INTS7,PRKCZ,GRB10,RYR3,TAF15,MSH6,MCPI1,RGS9,HECW1,ABCA5,PHF19,DUSP22,YAP1,BRINP1,MAPK1,MGA T5,ADAM22,USP25,PLG,ZNRF3,NRG3,UBE20,SFMBT2,NIPBL,GABPA,FAT3,CORO2B,STK38,PTPN13,SORCS3,LIMCH1,PAFAH1B1,EFEMP1,ZNF684,TM7SF3,DCAF1,TPM1,NF2,HIVEP1,CTNNA1,BIRC6,PPARA,MEIS2,NFIB,PRTG,PTPRK,PAK5,TRERF1,SEMA3C,DAPK1,NAV3,SLC24A4,SEC14L1,VPS13C,AGO2,PHC3,ALPK2,JARID2,DNAJC15,GATAD2B,ANK2,ADGRV1,ZNF846,BCAS3,RYR2,RANBP3L,SEMA6D,DUSP16,SMARCA4,FABP7,PARC3,MAPKAP1,TNRC6C,PIAS1,BLK,TNR,CXADR,ATRX,PTPRT,ELAVL4,ABL1,MXI1,PTPN12,HDAC4,OXR1,SLC1A1,PRKAA1,LRFN5,CREG1,L3MBTL3,NBAS,SLFN11,RAP1A,GLIS1,MORC1,TOX3,INPP5A,FGF10,GRID2,LATS2,NRG1,ASPM,ZNF438,ABC7,ZBTB16,KIR3DL2,ZNF675,SH3GL3,SETDB2,PRKCE,FOXK2,NXN,WNK2,FBN2,CD44,RGS12,PTPRO,TRIO,PDE3A,STXBP6,LIMD1,PEX14,SPRED2,RPS6KA3,ATP8A2,PTPN2,PLXNA2,RFC1,HTR2C,CLEC16A,ARHGEF7,AMBRA1,LTBP1,OPRM1,HTR2A,DAZL,KREMEN1,SEMA3E,TAF3,TMEM67,FHL2,ABHD17C,PUM1,TMOD2,HERC1,MSH2,IGF2BP3,ANKRD17,ZNF397,HIPK3,CDKN2C,EPN2,GRK3,CLSPN,BICRAL,MOSMO,MNAT1,RBBP8,MDFIC,ANK3,EMILIN2,HMGA2,CCND3,BCL11B,CREM,LYPLA1,MBP,TRPS1,TGFA,CRIM1,PRR5L,MYT1L,TJP1,LDLRAD4,NPHP4,PACSIN2,HLA-B,SNX3,NAA35,BCRA2,ZBTB2,BLM,SEMA3A,STRN,BMP2,RC3H2,ATP9A,SOGA1,ZC3H14,GFI1B,TBC1D4,RANBP9,RIN3,TMEM161A,SEMA3D,LEMD3,ARHGAP42,HMGB1,GNAQ,FGF9,NFATC2,SH3BP5,MDM1,SLC23A2,ANKRD26,ETS2,ZNF875,DSTYK,UIMC1,LRRFIP1,RAP1GAP,SRGAP2,DRAXIN,SLAMF1,SMARCA2,ETS1,GLI3,CGAS,SMARCC1,SNX6,CNKSR3,GRIK2,ZNF431,REER,MAP2,BTAF1,ATF2,HIRA,CYLD,BBS4,MAPK8IP1,COL5A1,NELL1,UBASH3A,NEU3,MRPL13,KITLG,UBR1,DCC,SLC30A10,RCAN1,RORB,DAB1,SELENON,RB1CC1,PTPRE,PRKN,MTMR2,ZNF608,TBX20,DACH1,ZNF541,DPF3,NGEF,ARID5B,JPH1,ATXN1,PRKCH,PKP1,FRMD4A,NLRC5,TFDP1,CNOT6L,KANK4,SNX25,PTPRB,ZFP90,COPS8,ZNF124,SHANK2,USP7,ENPP3,PLAGL1,SOX30,KIR2DL4,NPAS2,ROCK1,LYN,ARHGAP28,ZNF169,DTX1,TENM2,OVOL2,ZBTB33,NTN1,ZFHX3,DPYSL5,RNF152,OTUD7A,BMF,YTHDF3,TFF1,DEDD2,HECTD1,ARFGEF1,SNAI2,ASH1L,BID,SIAH2,TRABD2B,UFD1,SP3,ERN2,TIAL1,ELF2,NSD2,CD9,CARD10,TWIST2,SAMHD1,ENPP1,TP53I11,TMEM225,NDRG2,CSNK2A1,BMP5,CSF1,HDGFL3,BCL2L1,SERPINB9,SCAF4,CTDP1,HCN1,PRKG1,GRIN2B,GRB14,FANCB,CNMD,DHRS3,SMAD5,CELF4,TCERG1,ABCG1,FOXN3,SLC40A1,PRAME,TNN,MED1,CDC14B,IL33,AJAP1,BANK1,CSDE1,LMX1A,TMEM178A,IL10,SFPQ,SCML2,PRAMEF25,PTH,SOSTDC1,PRKAA2,NDC80,PACRG,ABHD2,ITPRIP,ETV6,IQGAP1,CAMLG,ZBTB7C,SREBF2,ANP32B,YBX3,AIMP1,NRXN1,PCID2,PBLD,PEG10,TWIST1,AKT3,JAK2,FSTL1,ZBTB38,PATL1,CREBBP,MELTF,TNKS,PCNA,SIAH3,UFL1,NFKBIA,PRKCB,ABCC8,ANXA4,RTRAF,BRD4,ZBTB21,NEDD9,ITGA6,ASS1,BTG3,ERLIN2,OTOP1,CIDEA,ZBTB49,AGO1,MEOX2,SLC6A1,STAT1,BRMS1L,NDFIP2,NR2C1,DGKG,MTPN,ABI1,CEMIP,PRAMEF2,IMPACT,PA RK7,ADAMTS18,MAPK8,OAZ2,POU1F1,ADCYAP1R1,MTF2,NCAPG</p> |
|--|------------------|----|-------------------------------------------------------------------------------------------------------------------------------------------------------------------------------------------------------------------------------------------------------------------------------------------------------------------------------------------------------------------------------------------------------------------------------------------------------------------------------------------------------------------------------------------------------------------------------------------------------------------------------------------------------------------------------------------------------------------------------------------------------------------------------------------------------------------------------------------------------------------------------------------------------------------------------------------------------------------------------------------------------------------------------------------------------------------------------------------------------------------------------------------------------------------------------------------------------------------------------------------------------------------------------------------------------------------------------------------------------------------------------------------------------------------------------------------------------------------------------------------------------------------------------------------------------------------------------------------------------------------------------------------------------------------------------------------------------------------------------------------------------------------------------------------------------------------------------------------------------------------------------------------------------------------------------------------------------------------------------------------------------------------------------------------------------------------------------------------------------------------------------------------------------------------------------------------------------------------------------------------------------------------------------------------------------------------------------------------------------------------------------------------------------------------------------------------------------------------------------------------------------------------------------------------------------------------------------------------------------------------------------------------------------------------------------------------------------------------------------------------------------------------------------------------------------------------------------------------------------------------------------------------------------------------------------------------------------------------------------------------------------------------------------------------------------------------------------------------------------------------------------------------------------------------------------------------------------------------------------------------------------------------------------------------------------------------------------------------------------------------------------------------------------------------------------------------------------------------------------------------------|



|            |                                               |                        |                                                                                                                                                                                                                                                                                                                                                                                                                                                                                                                                                                                                                                                                                                                                                                                                                                                                                                                                                                                                                                                                                                                                                                                                                                                                                                                                                                                                                                                                                                                                                                                                                                                                                                                                                                                                                                                                                                                                                                                                                                                                                                                                                                                                                                                                                           |
|------------|-----------------------------------------------|------------------------|-------------------------------------------------------------------------------------------------------------------------------------------------------------------------------------------------------------------------------------------------------------------------------------------------------------------------------------------------------------------------------------------------------------------------------------------------------------------------------------------------------------------------------------------------------------------------------------------------------------------------------------------------------------------------------------------------------------------------------------------------------------------------------------------------------------------------------------------------------------------------------------------------------------------------------------------------------------------------------------------------------------------------------------------------------------------------------------------------------------------------------------------------------------------------------------------------------------------------------------------------------------------------------------------------------------------------------------------------------------------------------------------------------------------------------------------------------------------------------------------------------------------------------------------------------------------------------------------------------------------------------------------------------------------------------------------------------------------------------------------------------------------------------------------------------------------------------------------------------------------------------------------------------------------------------------------------------------------------------------------------------------------------------------------------------------------------------------------------------------------------------------------------------------------------------------------------------------------------------------------------------------------------------------------|
|            |                                               |                        | <p>2, FOXP2, MYOCD, MEF2C, ADGRB1, RXRA, WNT7A, RBPMS2, NDFIP1, PRDM13, C16ORF72, MAGEL2, PDE2A, SDCBP, WWOX, ZBTB25, PASK, MLLT1, NCK1, SCAF8, FGR, CDCA8, PPP2R3A, RNF8, EPHA4, GABRA5, MECOM, DNMT3L, NTRK2, IL1RAPL1, NUMB, LHX9, ADAMTS9, ZBTB10, OCLN, SHISA6, IL17RD, FBXO31, IREB2, PTK2, CDH5, ANKRD6, ARHGAP12, CLDN18, ASCL3, DIAPH1, FEZ2, INIP, AP1P, UBE3A, SEMA4D, JAM2, ZBTB20, RUNX1, AKR1B1, KIRREL1, AMFR, NENF, PTGFR, SAMD13, TPTE, PDCL3, SRP9, GPR55, NSUN2, CDC45, BICD1, TNFSF11, FYN, BUB1, KDM5A, PCBP3, ZNF705G, PPM1F, SDE2, RBMS3, HDAC2, AVEN, GON4L, TBX15, COL18A1, ALB, ZFYVE28, PABPC1, CRTAM, APELA, TET1, HECW2, CDH2, RAD9A, PHLPP1, GPR137B, EPHB1, GRM5, ADCK1, ZNF705D, RPS6KA5, SPTB, TBC1D1, PTPRG, PID1, NRP1, MIDEAS, PRKCA, FAIM, FHIT, ITGA1, KLF12, RC3H1, NRIP1, POR, MCC, BCR, TUT4, RGS6, RERG, FBLN1, RAG1, BMPER, PRDM15, CUX1, SRGAP3, MACROH2A1, MITF, EPHB2, SACS, CD38, EYA4, AKAIN1, MET, ZNF705B, CDH13, SERPINB2, ATG5, MAGI2, PRDM11, UNK, MLIP, MYB, KALRN, MFHAS1, BMP7, ASTN2, DLG5, TNFAIP8, ZMYND8, KCTD1, BPTF, BTBD10, ZMYND11, TMEM25, DDX6, ADGRF5, WDR41, PPP1R13B, ABL2, BACE2, PARPBP, EYA1, FHOD3, SLIT2, CNOT7, ERBB4, IL20RB, ROBO1, SAMD4A, PBX1, NUF2, PRKCQ, ANTXR1, NDRG1, SORCS2, TRDN, MGMT, NLGN1, SHLD2, NOS1, ASIC2, EFNA5, NSD1, EHMT1, SLIT3, FRMD5, ESR1, KDM4B, LOXL2, IQCJ-SCHIP1, SKAP2, PRLR, AGO3, HTT, FOXB1, CAMK1D, PIK3R3, HLA-F, FER, EYA2, CCR2, STARD13, CHFR, EPS8, JAZF1, ZNF891, SPOCK3, SEMA4B, PHC2, GRIA4, ROCK2, PRDM1, RORA, DMRT1, RGS8, HERPUD1, COL4A3, WASHC1, RGS7, HOOK3, KIF7, FSTL4, BARD1, STK3, DEPTOR, ZNF423, ZNF568, HNRNPU, APCDD1, IGF1R, KCNAB1, PRKAG2, GLI2, THRB, MORC3</p>                                                                                                                                                                                                                                                                                                                                                                                                                                                                                                                                                                                |
| GO:0051128 | regulation of cellular component organization | 2.1959357350615172e-17 | <p>NOTCH2, MTOR, SPOCK1, ABCA13, PTPRD, LRRC4C, MYO9A, ULK2, PLCB1, SVIL, DLC1, PTPRA, RIPOR2, RDX, RP1, STXBP1, RALA, IL1RAPL2, BCL2, LRFN2, CDH8, CHRNA7, ROBO2, RIMS1, SPIRE1, TENM3, SDCCAG8, MINAR1, CDC42EP3, RIMS2, ALK, AUTS2, CARMIL1, MCTP1, PAPPAA2, RHPN2, ANO6, NEGR1, MLLT3, GPC6, CNTNAP2, MAP4, APC, PLPPR5, DSCAM, CRKL, ARHGAP24, TNK1, PTPRJ, EGFR, ANGPT1, MACF1, NEK7, NEDD4, MTRF1, NSMCE2, BTBD9, BCL11A, TMEM182, CDH4, NTRK3, PSMA8, CRACD, SLC39A12, TOM1L2, PRKD1, PAK1, EPHA7, RAPGEF2, ADGRB3, ARSB, SEPTIN9, RPTOR, EPB41L3, TBCD, NEDD4L, ADAM10, ATF7IP, APP, RPS6KA2, STAU2, MAPRE2, SEMA5A, SYT1, VCL, ARHGAP44, NTF3, CD2AP, AURKA, PARN, SRGAP2C, FIG4, KANK1, MAP4K4, AKAP6, CTNNA2, RAB8B, PAK3, DIP2B, TRPC5, RAP1GDS1, DNM3, NBN, PRKCZ, MCPH1, HECW1, COBL, SENP6, DUSP22, YAP1, MAPK1, NRG3, ANKFY1, SPIDR, FAT3, CORO2B, CHN1, MYLK3, LIMCH1, FMN1, PAFAH1B1, STON2, VPS13D, TLK1, TPM1, NF2, AKAP9, PPARA, SNX30, SYNJ1, TIAM1, PAK5, SEMA3C, NAV3, VPS13C, DNAJC15, TANC1, BCAS3, SYNE2, SEMA6D, SMARCA4, MAPKAP1, TBC1D5, TNFR, ATRX, ELAVL4, ABL1, HDAC4, PRKAA1, SDC2, LRFN5, L3MBTL3, RAP1A, MYO10, GRID2, PEAK1, NRG1, INO80D, GSG1L, CLIP1, ABCB7, MUSK, SH3GL3, SETDB2, PRKCE, DGKB, CD44, PTPRO, EGF, PDE3A, STXBP6, RPS6KA3, ATP8A2, MTMR3, PLXNA2, CLEC16A, ARHGEF7, ATP8A1, AMBRA1, STK38L, KREMEN1, SEMA3E, MARK2, TMEM67, C10ORF90, ABHD17C, TMOD2, LINGO2, CDKN2C, KNDC1, MNAT1, VPS41, MBP, PLCE1, TGFA, HIP1, CRIM1, FUT9, RUFY2, TJP1, LDLRAD4, NPHP4, PACSIN2, CNTN1, IQSEC1, SNX3, PDLIM5, DISC1, WDPCP, SEMA3A, BMP2, GNAI1, TBC1D4, RESF1, RIN3, BMP2K, SEMA3D, RELN, HMGB1, NFATC2, UST, MDM1, SLC23A2, UNC13B, RAP1GAP, PLS1, NIN, DRAXIN, ATF1, SLAMF1, SMARCA2, SMARCC1, KIF15, MAP2, LAMC1, FARP1, CYLD, BBS4, COL5A1, NEU3, DCC, YLPM1, DAB1, PRKN, MTMR2, TBX20, AFAP1, DPF3, NGEF, PRKCH, FRMPD4, CNOT6L, KANK4, FBLN5, TOX, SHANK2, USP7, ITS2, RALB, ROCK1, LYN, ARHGAP28, TENM2, NTN1, DPYSL5, ARID1B, INSR, BMF, NEK6, COLQ, DDHD1, ARFGEF1, PDE4DIP, SNAI2, BID, TANC2, TRABD2B, TRIM58, FYCO1, SH3GLB1, ENPP1, SNX9, ANAPC1, CSNK2A1, BMP5, HDGFL3, BCL2L1, SCAF4, CTDP1, GRIN2B, INO80, TNN, ROR2, LMX1A, IL10, ACTR2, SFPQ, CLSTN2, PRKA2, SKA1, NDC80, MAP6, VASP, IQGAP1, TEAD1, MORC2, SREBF2, N</p> |

|            |                      |                       |                                                                                                                                                                                                                                                                                                                                                                                                                                                                                                                                                                                                                                                                                                                                                                                                                                                                                                                                                                                                                                                                                                                                                                                                                                                                                                                                                                                                                                                                                                                                                                                                                                                                                                                                                                                                                                                                                                                                                                                                                       |
|------------|----------------------|-----------------------|-----------------------------------------------------------------------------------------------------------------------------------------------------------------------------------------------------------------------------------------------------------------------------------------------------------------------------------------------------------------------------------------------------------------------------------------------------------------------------------------------------------------------------------------------------------------------------------------------------------------------------------------------------------------------------------------------------------------------------------------------------------------------------------------------------------------------------------------------------------------------------------------------------------------------------------------------------------------------------------------------------------------------------------------------------------------------------------------------------------------------------------------------------------------------------------------------------------------------------------------------------------------------------------------------------------------------------------------------------------------------------------------------------------------------------------------------------------------------------------------------------------------------------------------------------------------------------------------------------------------------------------------------------------------------------------------------------------------------------------------------------------------------------------------------------------------------------------------------------------------------------------------------------------------------------------------------------------------------------------------------------------------------|
|            |                      |                       | <p>RXN1,PCID2,SNAP91,CENPE,NET1,ANLN,ALKAL2,PRSS2,MELT F,TNKS,ABCC8,USH1C,NEDD9,ITGA6,GAP43,GRIP1,SAR1A,DG KG,MTPN,IMPACT,PARK7,MAPK8,MYOCD,CEP120,CYFIP2,MEF2 C,ADGRB1,WNT7A,MAP3K4,WASF3,MAGEL2,RAD51AP1,PDE2A,FBXW8,SDCBP,NECTIN1,NSMCE1,NCK1,SCAF8,CDCA8,EPHA4,NT RK2,IL1RAPL1,NUMB,OCN,FBXO31,EXTL3,PTK2,MARK4,CDH5,MPP7,DIAPH1,FEZ2,LAMB1,CYFIP1,UBE3A,PCDH8,SEMA4D,R UNX1,KIRREL1,SAXO1,ASAP1,CCDC88A,ADAMTS16,BICD1,FYN,BUB1,PPM1F,ADGRL2,HDAC2,SLF1,NCS1,MAPK9,APELA,ROR1,TET1,HECW2,CDH2,EPHB1,ADCK1,SPTB,PTPRG,PID1,NRP1,FBXW8,CHSD2,CHODL,RERG,CUX1,MACROH2A1,EPHB2,TOGARAM1,SACS,CD38,AKAIN1,MET,CDH17,PPFIA2,CDH13,ATG5,MAGI2,PRDM11,FLRT2,KALRN,LAMA1,TIAM2,BMP7,DLG5,ABL2,PHOD3,SLIT2,SYNDIG1,ROBO1,NUF2,PRKCQ,ANTXR1,NLGN1,CTTNBP2,ASIC2,EFNA5,GAS2L1,ARHGEF11,SLIT3,ESR1,NTNG1,IQCI-SCHIP1,HTT,CAMK1D,FER,CHFR,EPSS8,SEMA4B,ROCK2,STMP1,ATAT1,DMRT1,CDCA5,RAB31,CSMD3,WASHC1,FSTL4,C1QL3,HNRNP, RAB3GAP2,IGF1R,AKAP13,ATP10A,DNM1L</p>                                                                                                                                                                                                                                                                                                                                                                                                                                                                                                                                                                                                                                                                                                                                                                                                                                                                                                                                                                                                                                                              |
| GO:0007155 | cell adhesion        | 6.378908581003301e-17 | <p>CNTN4,SPOCK1,PTPRD,FREM1,LRR4C,TLN2,TENM4,DLC1,ZDHHC21,PTPRA,RIPOR2,RDX,STXBP1,BCL2,FBN1,CDH8,ROBO2,TENM3,CNTNAP5,USH2A,ADGRE1,PCDH7,CARMIL1,ERBIN,ASTN1,RIN2,PARVB,NEGR1,GPC6,CNTNAP2,SPON1,APC,HHLA2,DSCAM,CRKL,ILDR2,PTPRJ,EGFR,ANGPT1,MACF1,CTNNA3,HMCN2,CRB1,CDH4,CNTN3,NEO1,CNTN6,EPHA7,CTNNAL1,ONECUT1,ADAMTSL1,CCL28,TBCD,ADAM32,ADAM10,APP,DOCK8,SEMA5A,VCL,ACER2,CD2AP,IGSF5,CFDP1,KANK1,MAP4K4,CTNNA2,ITPKB,PRKCZ,DUSP22,CADM2,ADAM22,ALCAM,PLG,ITGBL1,NCAM1,FA T3,CORO2B,LIMCH1,FMN1,ITGB8,TPM1,NF2,CTNNA1,CDH7,PPARA,PTG,TIAM1,PTPRK,PARD3B,PCDH11Y,MAGI1,ADGRV1,BCAS3,SMARCA4,CDH11,PARD3,BLK,TNR,DST,CXADR,NUAK1,PTPRT,ABL1,ITGB3BP,LRFN5,APBB1IP,NFAT5,CDH18,MYO10,GRI D2,CDHR3,PEAK1,NRG1,AP3B1,COL6A5,ZBTB16,PRKCE,PGM5,CD44,PTPRO,EXT1,STXBP6,COL5A3,CTNND2,PTPN2,PLXNA2,ATXN3,ARHGEF7,CD96,AMBRA1,SEMA3E,LPP,COL6A6,STK10,ADAM12,ANK3,EMILIN2,DOCK5,MBP,FUT9,PCDH9,VAV1,CDH20,TJP1,NPHP4,EGFLAM,CNTN1,PDLIM5,DISC1,WDCP,BMP2,RC3H2,UNC5D,NCAM2,RELN,HMGB1,DOCK1,SRGAP2,SLAMF1,SMARCA2,ETS1,GLI3,MEGF11,SMARCC1,LAMC1,LAMC3,COL5A1,ITGA9,COL14A1,RGMB,KITLG,DCC,DAB1,PCDH15,CDH23,PKP1,FBLN5,VAV3,ROCK1,LYN,VCAM1,DTX1,TENM2,NTN1,ZFH3X,ARID1B,SNAI2,CD9,JCAD,UTRN,RASGRP1,IGSF11,CDH26,BMP5,CSF1,PRKG1,LAMA3,TNN,MICALL2,ATRN,AJAP1,FAT1,IL10,CLSTN2,FYB2,NRXN1,CD70,CADM1,SSPN,JAK2,SVEP1,CELSR2,PRSS2,MELTF,NTM,PCDH11X,NEDD9,OLFM4,ITGA6,ASS1,HEPACAM,NECTIN4,ADAMTS18,ITGA4,TM9SF4,HMCN1,CYFIP2,ADGRB1,NDFIP1,SERPINI2,PKN2,NECTIN1,DSG1,NCK1,TINAG,EPHA4,IL1RAPL1,FNDC3A,ADAMTS9,POSTN,MEGF10,TRPM7,PTK2,CDH5,NFKBID,CLDN18,LAMB1,PCDH8,SEMA4D,JAM2,FAT4,RUNX1,KIRREL1,EDIL3,TNFSF11,FYN,PPM1F,CNTNAP3,COL18A1,CDH9,CRTAM,COL19A1,SLC39A8,CDH2,CNTN5,ITGA8,NTN4,EPHB1,NRP1,SDK1,PRKCA,ITGA1,RC3H1,BCR,NRXN3,CDH12,FBLN1,RAG1,DGCR2,EPHB2,MUC16,DLG2,CDH17,PPFIA2,CDH13,VMP1,FLRT2,MYB,GNAS,LAMA1,ATRNL1,IGSF21,BMP7,ASTN2,DLG5,KIRREL3,ABL2,PDZD2,CCDC141,IL20RB,ROBO1,PRKCQ,ANTXR1,NLGN1,EFNA5,VCAN,FRMD5,NTNG1,LOXL2,PRLR,OPCML,FER,CCR2,ROCK2,PPP1CB,COL4A3,CLDN10,RSU1,GLI2,LSAMP</p> |
| GO:0050808 | synapse organization | 4.650376056439441e-16 | <p>PTPRD,LRR4C,UNC13C,ERC1,IL1RAPL2,LRFN2,GPHN,CDH8,CHRNA7,ROBO2,GABRB3,CACNG2,NEGR1,GPC6,DSCAM,CRKL,DOCK10,NEDD4,NTRK3,CAST,SLC8A3,EPHA7,ADGRB3,ADAM10,APB B2,APP,CACNB2,STAU2,GABRG2,ARHGAP44,SRGAP2C,CTNNA2,PAK3,ERC2,DNM3,DIP2A,NFIA,PAFAH1B1,CNKSR2,PDZRN3,TMEM108,TANC1,TNR,ABL1,SLC1A1,LRFN5,GRID2,NRG1,MUSK,DGKB,PTPRO,CTNND2,SEMA3E,ABHD17C,LINGO2,AFG3L2,ANK3,PDLIM5,DISC1,DNER,RELN,UNC13B,SRGAP2,FARP1,MTMR2,LG I2,NGEF,FRMPD4,ALS2,SHANK2,MESD,SYBU,NTN1,INSR,COLQ,TANC2,GRIN2B,LMX1A,IL10,ACTR2,CLSTN2,NRXN1,NEDD9,G</p>                                                                                                                                                                                                                                                                                                                                                                                                                                                                                                                                                                                                                                                                                                                                                                                                                                                                                                                                                                                                                                                                                                                                                                                                                                                                                                                                                                                                                                                                                |

|            |                                   |                        |                                                                                                                                                                                                                                                                                                                                                                                                                                                                                                                                                                                                                                                                                                                                                                                                                                                                                                                                                                                                                                                                                                                                                                                                                                                                                                                                                                                                                                                                                                                                                                                                                                                                                                                                                                                                                                                                                                                                                                                                                                                                                                                                                                                                                                                                                                                                                                                                                                                                                                                                                                                                                                                 |
|------------|-----------------------------------|------------------------|-------------------------------------------------------------------------------------------------------------------------------------------------------------------------------------------------------------------------------------------------------------------------------------------------------------------------------------------------------------------------------------------------------------------------------------------------------------------------------------------------------------------------------------------------------------------------------------------------------------------------------------------------------------------------------------------------------------------------------------------------------------------------------------------------------------------------------------------------------------------------------------------------------------------------------------------------------------------------------------------------------------------------------------------------------------------------------------------------------------------------------------------------------------------------------------------------------------------------------------------------------------------------------------------------------------------------------------------------------------------------------------------------------------------------------------------------------------------------------------------------------------------------------------------------------------------------------------------------------------------------------------------------------------------------------------------------------------------------------------------------------------------------------------------------------------------------------------------------------------------------------------------------------------------------------------------------------------------------------------------------------------------------------------------------------------------------------------------------------------------------------------------------------------------------------------------------------------------------------------------------------------------------------------------------------------------------------------------------------------------------------------------------------------------------------------------------------------------------------------------------------------------------------------------------------------------------------------------------------------------------------------------------|
|            |                                   |                        | AP43,SLC6A1,MEF2C,ADGRB1,WNT7A,WASF3,SDCBP,NECTIN1,EPHA4,NTRK2,IL1RAPL1,SHISA6,CYFIP1,UBE3A,PCDH8,SEMA4D,NOS1AP,FYN,ADGRL2,CDH2,CNTN5,EPHB1,GRM5,NRP1,SDK1,NRXN3,EPHB2,PPFIA2,FLRT2,KALRN,IGSF21,DLG5,GABRA2,KIRREL3,ERBB4,SYNDIG1,NLGN1,CTTNBP2,ASIC2,EFNA5,NTNG1,C1QL3,IGF1R                                                                                                                                                                                                                                                                                                                                                                                                                                                                                                                                                                                                                                                                                                                                                                                                                                                                                                                                                                                                                                                                                                                                                                                                                                                                                                                                                                                                                                                                                                                                                                                                                                                                                                                                                                                                                                                                                                                                                                                                                                                                                                                                                                                                                                                                                                                                                                  |
| GO:0016358 | dendrite development              | 9.24587095345252e-16   | PTPRD,CHRNA7,ALK,DSCAM,CRKL,TNIN,DOCK10,NEDD4,BCL11A,PHACTR1,RAPGEF2,ADGRB3,NEDD4L,APP,DCLK1,STAU2,ARHGAP44,SRGAP2C,CTNNA2,PAK3,TRPC5,DNM3,KLHL1,DIP2A,HECW1,COBL,FAT3,PAFAH1B1,ELAVL4,ABL1,SDC2,CTNND2,KNDC1,IQSEC1,PDLIM5,DISC1,SEMA3A,STRN,RELN,SRGAP2,RERE,MAP2,FARP1,BBS4,DCC,DAB1,NGEF,NTN1,DPYSL5,TANC2,BMP5,PRKG1,ACTR2,MAP6,CELSR2,GRIP1,DGKG,ABI1,MEF2C,WNT7A,FOXO6,FBXW8,EPHA4,IL1RAPL1,FBXO31,CYFIP1,UBE3A,SEMA4D,ASAP1,FYN,HDAC2,HECW2,EPHB1,NRP1,SDK1,CUX1,EPHB2,PPFIA2,KALRN,BMP7,DLG5,NLGN1,CAMK1D,CSMD3,FSTL4                                                                                                                                                                                                                                                                                                                                                                                                                                                                                                                                                                                                                                                                                                                                                                                                                                                                                                                                                                                                                                                                                                                                                                                                                                                                                                                                                                                                                                                                                                                                                                                                                                                                                                                                                                                                                                                                                                                                                                                                                                                                                                                  |
| GO:0009966 | regulation of signal transduction | 1.4360535308943907e-15 | NOTCH2,BCAR3,MTOR,WWC1,GARNL3,PTPRD,MYO9A,NLK,KSR1,PLCB1,ZNF536,DLCL1,RIPOR2,PDE4D,RDX,BCL2,PRDM16,ARHGAP26,FBN1,CHRNA7,ROBO2,RIMS1,ZEB1,AKR1C3,FGD4,SPRED1,MINAR1,RIMS2,ALK,AUTS2,PJA2,BABAM2,ERBIN,CACNG2,DLGAP1,MLLT3,GPC6,APC,CRKL,ARHGAP24,TNIN,PTPRJ,KDM4C,EGFR,DENND1A,ANGPT1,MACF1,PRKACB,RGS3,NCOR1,RNF220,DOCK2,NEDD4,SCAI,SGMS1,CHSY1,NTRK3,ZFAND6,DKK2,FLT1,MAPKBP1,DGKI,INVS,EDAR,NEO1,CNTN6,SLC8A3,PRKD1,TPTE2,PAK1,EPHA7,RALGPS1,RAPGEF2,PELI2,LRP2,RUNX2,TAOK3,ONECUT1,TAFA4,RPTOR,GHR,RALGAP1,ADAM10,IL1R1,APP,DOCK8,MAPRE2,USP18,SEMA5A,ARHGAP44,NTF3,CD2AP,AURKA,PTPRR,KANK1,MAP4K4,BMPR1B,PCSK6,AKAP6,HOMER2,ARNT,PAK3,ITPKB,RGS20,PDE10A,RAP1GDS1,KICS2,PRKCZ,GRB10,ARHGAP32,RGS9,HECW1,DUSP22,YAP1,MAPK1,MGAT5,PDGFR,ZNRF3,ARHGEF17,UBE20,NCAM1,STK38,PTPN13,CHN1,HRH4,PAFAH1B1,ATF6,NF2,CNKSR2,CTNNA1,MOB3B,BIRC6,AKAP9,KLF15,RASGRF2,PPARA,ADAMTS3,TIAM1,GRM1,ARHGEF12,PAK5,PCDH11Y,PLA2R1,DAPK1,SLC24A4,SEC14L1,TMEM108,ALPK2,RIC8B,IL34,ADGRV1,DUSP16,SMARCA4,USP8,MAPKAP1,BLK,MBD5,NUAK1,PTPRT,ABL1,PTPN12,PRKAA1,GAS2,NFAT5,GUCY1A2,RAP1A,GPC5,FGF10,ZC3HAV1,LATS2,NRG1,GSGL,ASPM,DENND2B,RASGRF1,ZNF675,GNG7,PRKCE,NXN,WNK2,USP33,DENND4C,FBN2,CD44,RGS12,PTPRO,EGF,TRIO,PDE3A,LIMD1,SPRED2,CTNND2,PTPN2,TRIM5,MCF2L,HTR2C,CLEC16A,LTBP1,OPRM1,HTR2A,FANCA,KREMEN1,SEMA3E,GCSAML,FHL2,CNIH3,PUM1,TMOD2,ANKRD17,RELL1,HIPK3,EPN2,EVC,GRK3,MOSMO,MDFIC,CCND3,PLCE1,TGFA,HIP1,CRIM1,PRR5L,VAV1,LDLRAD4,NPHP4,IQSEC1,SNX3,BCA2,DISC1,NRK,SEMA3A,MAGI3,BMP2,RC3H2,GNAI1,RALGAP2,RANBP9,BMP2K,TMEM16A,NETO2,LEMD3,RELN,ARHGAP42,HMGB1,GNAQ,FGF9,TRAF3,UNC13B,TT21B,DSTYK,RAP1GAP,SRGAP2,DRAXIN,SLAMF1,GLI3,SNX6,SLOC2,CNKSR3,PSD3,GAREM1,LAMC1,NEK10,CYLD,MAPK8IP1,KPNA1,UBASH3A,NEU3,KITLG,CAMTA1,UBR1,SLC30A10,RCAN1,DAB1,RB1CC1,PTPRE,PRKN,MTMR2,TBX20,DLGAP2,AFAP1,NGEF,GRIN2A,PRKCH,IL6R,ALS2,RACGAP1,NLRC5,SNX25,SHISA9,SHANK2,USP7,VAV3,SOX30,ARHGEF28,ROCK1,LYN,ARHGAP28,ARHGAP31,SLC44A2,SLC15A2,DTX1,OVOL2,RRAGD,CRACR2A,RNF152,OTUD7A,INSR,YTHDF3,DEDD2,NEK6,ARFGEF1,SNAI2,ASH1L,BID,SIH2,TRABD2B,UFD1,ERN2,TIAL1,NREP,ZDHHC17,RALGPS2,JCAD,SAMHD1,IFT81,ENPP1,RASGRP1,IGSF11,NDRG2,CSNK2A1,BMP5,CSF1,GHRH,BCL2L1,GRIN2B,GRB14,DHRS3,CELF4,PRAME,TNN,MED1,ROR2,KL,BANK1,IL10,SFPQ,PTH,SOSTDC1,PRKAA2,NDC80,ITPRIP,IQGAP1,RPS12,SREBF2,YBX3,NRXN1,PCID2,HIPK1,CIBAR1,PBLD,FICD,PEG10,NET1,SIPA1L2,TWIST1,AKT3,ALKAL2,JAK2,RPF2,FSTL1,MADD,HCTR1,CREBBP,TNKS,GORAB,UFL1,NFKBIA,PRKCB,BRD4,ITGA6,OTOP1,CIDEA,ARFGEF3,GID8,STAT1,BRMS1L,NDFIP2,NR2C1,MAP2K6,DGKG,CCBE1,PARK7,FBXL17,ADCYAP1R1,NCAPG2,MYOCD,CYFIP2,EFHB,MEF2C,RXRA,WNT7A,RBPMS2,MAP3K5,NDFIP1,MAP3K4,S100B,ATP6V1C2,C16ORF72,PDE2A,SDCBP,JPT2,SPPL |

|                |                                                          |                                    |                                                                                                                                                                                                                                                                                                                                                                                                                                                                                                                                                                                                                                                                                                                                                                                                                                                                                                                                                                                                                                                                                                                                                                                                                                                                                                                                   |
|----------------|----------------------------------------------------------|------------------------------------|-----------------------------------------------------------------------------------------------------------------------------------------------------------------------------------------------------------------------------------------------------------------------------------------------------------------------------------------------------------------------------------------------------------------------------------------------------------------------------------------------------------------------------------------------------------------------------------------------------------------------------------------------------------------------------------------------------------------------------------------------------------------------------------------------------------------------------------------------------------------------------------------------------------------------------------------------------------------------------------------------------------------------------------------------------------------------------------------------------------------------------------------------------------------------------------------------------------------------------------------------------------------------------------------------------------------------------------|
|                |                                                          |                                    | <p>2B, WWOX, NCK1, FGR, CDCA8, PPP2R3A, DNMBP, EPHA4, CYTH4, ME<br/>COM, NTRK2, POSTN, SHISA6, IL17RD, MVB12B, PTK2, CDH5, ANKR<br/>D6, ARHGAP12, LAMB1, AP1P, CYFIP1, UBE3A, SEMA4D, WNT5B, AM<br/>FR, NENF, NOS1AP, TPTE, CCDC88A, GPR55, BICD1, TNFSF11, FYN<br/>, RBMS3, HDAC2, DOCK3, DOK5, ZFYVE28, MAPK9, APELA, ROR1, TE<br/>T1, CDH2, ITGA8, RAD9A, PHLPP1, GPR137B, EPHB1, GRM5, RAI14<br/>, PID1, NRP1, PRKCA, FAIM, ITGA1, RC3H1, POR, MCC, BCR, RGS6,<br/>ELP2, FBLN1, STK36, BMPER, PRDM15, SRGAP3, EPHB2, CSNK1G1,<br/>EYA4, CDK14, MET, SPPL3, CDH13, CACNG3, MAGI2, PRDM11, KALR<br/>N, GNAS, LAMA1, MFHAS1, TIAM2, BMP7, DLG5, ZMYND11, TMEM25,<br/>PDGFC, ABL2, EYA1, SLIT2, CNOT7, KCTD8, ERBB4, ROBO1, PRKCQ<br/>, SIPA1L3, NLGN1, ARHGEF11, SLIT3, ESR1, MYO9B, IQCJ-<br/>SCHIP1, PRLR, AGO3, HTT, FER, EYA2, CCR2, STARD13, EPS8, ROC<br/>K2, RORA, DMRT1, RGS8, HERPUD1, RGS7, KIF7, FSTL4, BARD1, ST<br/>K3, DEPTOR, ZNF423, APCDD1, IGF1R, GLI2, THRB, AKAP13, DNMI<br/>L</p>                                                                                                                                                                                                                                                                                                                           |
| GO:00<br>10975 | regulation<br>of neuron<br>projection<br>developmen<br>t | 1.59987<br>8890814<br>9386e-<br>15 | <p>SPOCK1, PTPRD, LRRC4C, ULK2, ROBO2, TENM3, MINAR1, ALK, NEG<br/>R1, PLPPR5, DSCAM, CRKL, TNIK, MACF1, NEDD4, BCL11A, CDH4, N<br/>TRK3, SLC39A12, PRKD1, PAK1, EPHA7, RAPGEF2, ADGRB3, ARSB,<br/>NEDD4L, STAU2, SEMA5A, ARHGAP44, FIG4, KANK1, CTNNA2, PAK3<br/>, DIP2B, TRPC5, DNMT3, HECW1, COBL, FAT3, CHN1, PAFAH1B1, TIA<br/>M1, SEMA3C, SEMA6D, TNFR, ELAVL4, ABL1, SDC2, RAP1A, GRID2, P<br/>TPRO, ATP8A2, PLXNA2, KREMEN1, SEMA3E, MARK2, KNDCC1, MBP, F<br/>UT9, CNTN1, SNX3, PDLIM5, DISC1, SEMA3A, SEMA23, RELN, UST,<br/>NIN, DRAXIN, ATF1, MAP2, DCC, DAB1, NGEF, TOX, LYN, NTN1, DPY<br/>SL5, TANC2, BMP5, TNN, ROR2, ACTR2, MAP6, NRXN1, ALKAL2, ITG<br/>A6, DGKG, WNT7A, FBXW8, NCK1, EPHA4, NTRK2, IL1RAPL1, FBXO3<br/>1, CYFIP1, UBE3A, SEMA4D, CCDC88A, FYN, HDAC2, NCS1, ROR1, H<br/>ECW2, CDH2, PTPRG, NRP1, CHODL, CUX1, EPHB2, CD38, PPPIA2, M<br/>AGI2, KALRN, TIAM2, BMP7, ABL2, SLIT2, ROBO1, NLGN1, EFNA5,<br/>NTNG1, CAMK1D, SEMA4B, CSMD3, FSTL4, IGF1R</p>                                                                                                                                                                                                                                                                                                                                        |
| GO:00<br>34329 | cell<br>junction<br>assembly                             | 7.03687<br>7948408<br>7355e-<br>15 | <p>PTPRD, MYO9A, TLN2, DLC1, PTPRA, IL1RAPL2, BCL2, CDH8, ROBO<br/>2, GABRB3, NEGR1, GPC6, CNTNAP2, APC, DSCAM, CRKL, PTPRJ, MA<br/>CF1, NTRK3, EPHA7, RAPGEF2, ADGRB3, PATJ, EPB41L3, TBCD, AP<br/>P, STAU2, GABRG2, VCL, SRGAP2C, MAP4K4, DNMT3, DUSP22, CORO2<br/>B, LIMCH1, FMN1, CTNNA1, CDH7, PTPRK, ANK2, BCAS3, CDH11, PA<br/>RD3, DST, ABL1, LRFN5, CDH18, RAP1A, GRID2, CDHR3, PEAK1, NR<br/>G1, MUSK, PTPRO, CTNND2, ARHGEF7, LINGO2, CDH20, TJP1, NPHP<br/>4, PDLIM5, DNER, WPCP, STRN, SRGAP2, LAMC1, FARP1, LGI2, PR<br/>KCH, PKP1, SHANK2, ROCK1, NTN1, COLQ, SNAI2, CD9, MICALL2, C<br/>LSTN2, NRXN1, HIPK1, ITGA6, GAP43, MEF2C, ADGRB1, WNT7A, PK<br/>N2, SDCBP, NECTIN1, DSG1, NTRK2, IL1RAPL1, OCLN, PTK2, CDH5<br/>, CLDN18, MPP7, SEMA4D, PPM1F, ADGRL2, CDH9, CDH2, CNTN5, EP<br/>HB1, NRP1, SDK1, PRKCA, BCR, NRXN3, CDH12, EPHB2, VMP1, FLRT<br/>2, DLG5, GABRA2, KIRREL3, ERBB4, SYNDIG1, NLGN1, ASIC2, EFN<br/>A5, FER, ROCK2, CLDN10</p>                                                                                                                                                                                                                                                                                                                                                              |
| GO:00<br>65008 | regulation<br>of<br>biological<br>quality                | 7.28393<br>8180043<br>852e-15      | <p>MTOR, UNC80, CNTN4, NSG1, SGCD, PTPRD, SLC24A2, KCNH5, MICU<br/>2, ULK2, NLK, UNC13C, FTO, ZNF236, SVIL, PIEZO2, TNRC6B, ZDH<br/>HC21, ITPR2, PDE4D, RDX, RP1, STXBP1, ERC1, IL1RAPL2, BCL2,<br/>KCNMA1, PRDM16, ALDH1A2, LRFN2, F13A1, GPHN, CDH8, CHRNA7,<br/>ROBO2, RIMS1, GABRB3, AKR1C3, NAV2, ENPEP, USH2A, CDC42EP3<br/>, RIMS2, ALK, CARMIL1, MCTP1, ERBIN, ANO6, CACNG2, NEGR1, GP<br/>C6, APC, TSHZ3, DSCAM, ILDR2, SLC4A10, PTPRJ, DOCK10, RFX3,<br/>ANGPT1, MACF1, CTNNA3, PRKACB, NEDD4, CRB1, BTBD9, BCL11A,<br/>GRIK3, FLI1, CDH4, ATP2B2, NTRK3, LARGE1, CYP2C9, THRAP3, G<br/>ABRB1, DGKI, GRIA1, CRACD, TTC39B, NEO1, SLC39A12, SLC8A3,<br/>MALRD1, NELL2, PRKD1, EPHA7, CHRM3, GRAMD1B, RAPGEF2, ADGR<br/>B3, FGF12, GABRA6, CPS1, TMEM38B, SLC24A3, LDB2, TAFA4, PTP<br/>RN2, SYN2, CCL28, RPTOR, GHR, THADA, NEDD4L, TRPM1, ADAM10,<br/>HDAC9, ATF7IP, APBB2, APP, ABCB5, RPS6KA2, CACNA1C, CACNB2<br/>, STAU2, GABRG2, SEMA5A, SYT1, VCL, ARHGAP44, NDUFAF2, AURK<br/>A, PARN, SLC8A1, ABCG8, KANK1, KCNE4, PCSK6, AKAP6, HOMER2,<br/>CTNNA2, ARNT, RAB8B, PAK3, DIP2B, KCNK10, LARP1, ITPKB, TRP<br/>C5, RAP1GDS1, RNLS, CHST8, ERC2, DNMT3, CUBN, SCP2, SYN3, PRK<br/>CZ, GRB10, RYR3, TAF15, ABCA5, EBF2, YAP1, MAPK1, CADPS2, HR<br/>H2, TRPC7, ADAM22, KMT2E, PLG, SLC16A1, MICU1, CORO2B, HRH4</p> |

|            |                                    |                       |                                                                                                                                                                                                                                                                                                                                                                                                                                                                                                                                                                                                                                                                                                                                                                                                                                                                                                                                                                                                                                                                                                                                                                                                                                                                                                                                                                                                                                                                                                                                                                                                                                                                                                                                                                                                                                                                                                                                                                                                                                                                                                                                                                                                                                                                                                                                                                                                                                                                                                                                                                                                                                                                                                                                                                                                                                                                                                                                                                                                                                                                 |
|------------|------------------------------------|-----------------------|-----------------------------------------------------------------------------------------------------------------------------------------------------------------------------------------------------------------------------------------------------------------------------------------------------------------------------------------------------------------------------------------------------------------------------------------------------------------------------------------------------------------------------------------------------------------------------------------------------------------------------------------------------------------------------------------------------------------------------------------------------------------------------------------------------------------------------------------------------------------------------------------------------------------------------------------------------------------------------------------------------------------------------------------------------------------------------------------------------------------------------------------------------------------------------------------------------------------------------------------------------------------------------------------------------------------------------------------------------------------------------------------------------------------------------------------------------------------------------------------------------------------------------------------------------------------------------------------------------------------------------------------------------------------------------------------------------------------------------------------------------------------------------------------------------------------------------------------------------------------------------------------------------------------------------------------------------------------------------------------------------------------------------------------------------------------------------------------------------------------------------------------------------------------------------------------------------------------------------------------------------------------------------------------------------------------------------------------------------------------------------------------------------------------------------------------------------------------------------------------------------------------------------------------------------------------------------------------------------------------------------------------------------------------------------------------------------------------------------------------------------------------------------------------------------------------------------------------------------------------------------------------------------------------------------------------------------------------------------------------------------------------------------------------------------------------|
|            |                                    |                       | <p>,SORCS3,MYLK3,FMN1,PAFAH1B1,TM7SF3,TPM1,NF2,GRIK4,CORIN,AKAP9,KLF15,RASGRF2,PPARA,SYNJ1,NR5A2,GRM1,GABRG1,SEMA3C,SLC24A4,TMEM108,AGO2,SCN2A,RAB22A,CPE,ANK2,TANC1,ADGRV1,RYR2,BBS2,WNT9B,SLC9C1,SEMA6D,NBEA,SMARCA4,USP8,TNRC6C,BLK,TNR,CXADR,DOCK4,MBD5,ELAVL4,ABL1,SLC1A1,PRKAA1,SLC12A8,KCNH1,LRFN5,ANO4,L3MBTL3,DMXL2,EIPR1,RAP1A,FGF10,GRID2,NRG1,SGS1L,AP3B1,RASGRF1,PAH,ATP11C,ABCB7,MUSK,ZNF675,PRKCE,FOXK2,SLMAP,WNK2,ESRRG,DGKB,USP33,PTPRO,ABCC9,P2RX6,PDE3A,EXT1,LNPEP,ATP8A2,SCG5,PTPN2,HTR2C,RIC3,ARHGEF7,ATP8A1,AMBRA1,OPRM1,HTR2A,CYBRD1,CYP4A11,DAZL,CNNM4,SEMA3E,ALPL,C10ORF90,ABHD17C,PUM1,TMOD2,IGF2BP3,CDIN1,APBA2,MAIP1,LINGO2,KCND2,NOS2,AFG3L2,MOSMO,SGCZ,TMTC2,ANK3,EMILIN2,DOCK5,F5,ECE1,MBP,TRAPPC11,PLCE1,HIP1,GSR,VAV1,TJP1,NPHP4,CACNA1I,PDLIM5,DISC1,SLC10A7,SEMA3A,STX12,BMP2,RC3H2,ATP9A,SCN11A,ZC3H14,MYRIP,TTT,R,RIN3,SEMA3D,RELN,ARHGAP42,HMGB1,GNAQ,UNC13B,UBAP2L,PLS1,SLC39A6,DRAXIN,CCDC186,KCNH8,ETS1,SLC9A4,GABRR2,GRIK2,IDE,MCTP2,MYEF2,MAP2,PEX6,LAMC1,FARP1,ATF2,BBS4,CFTR,KITLG,ZZEF1,ATP10B,DCC,SLC30A10,TADA2A,SELENON,RB1CC1,PRKN,MTMR2,PCDH15,NGEF,HEPHL1,GRIN2A,JPH1,TXNRD2,CDH23,SLC12A1,TG,FRMPD4,ALS2,ACO1,DHRS11,CNOT6L,KANK4,KCNQ3,SHISA9,SLC4A4,SCN10A,SHANK2,USP7,VAV3,ENPP3,KCND3,HAAO,PPA2,ROCK1,LYN,SEL1L,ARHGAP28,CTSB,NTN1,INSR,YTHDF3,TFF1,DEDD2,GRID1,COLQ,NMU,ARFGEF1,BID,RPH3A,TANC2,ABCA4,SP3,GABRG3,TRIM58,S3GLB1,CD9,XKR5,ENPP1,IGSF11,SNX9,BMP5,KCNC1,CSF1,GHRH,BCL2L1,HCN1,PRKG1,GRIN2B,CLNS1A,DHRS3,SMAD5,CELF4,ABCG1,KCNK5,VSTM4,SLC40A1,MED1,KL,CSDE1,TMEM178A,IL10,ACTR2,CLSTN2,PTH,PRKAA2,NDC80,VASP,PLA2G4A,CAMLG,SREBF2,YBX3,AIMP1,NRXN1,PCID2,DGKK,PBLD,AKT3,JA2,SLC1A7,FSTL1,HCRT1,PTGS1,PATL1,CELSR2,FH,CREBBP,MELTF,SIAH3,TRPV5,UFL1,ADAMTS5,PRKCB,ABCC8,MT1HL1,USH1C,SERBP1,NEDD9,ATP2B1,IARS2,GRIP1,XKR6,CIDEA,EXT2,SLC6A1,STAT1,MAP2K6,DGKG,SLC6A11,MTPN,CEMIP,PARK7,ADAMTS18,MAPK8,ADCYAP1R1,PLA2G12B,CSMD1,NCAPG2,TM9SF4,RAPGEF4,ATP13A3,CYFIP2,HNRNPM,ACACA,MEF2C,ADGRB1,WNT7A,NDFIP1,S100B,PDE2A,RAB38,NECTIN1,DSG1,PASK,NCK1,FLVCR1,SNAP29,EPHA4,GABRA5,NTRK2,IL1RAPL1,ACSM2A,NUMB,FRRS1,OCN,SHISA6,AKAP11,TRPM7,GRIK1,PRKAB1,IREB2,PTK2,CDH5,SCGN,CLDN18,DIAPH1,CYFIP1,UBE3A,PCDH8,SEMA4D,JAM2,ZBTB20,AP2B1,AKR1B1,KIRREL1,SAXO1,SCARA5,NENF,PTGFR,ICA1,PLCZ1,NOS1AP,MTTP,SLC9A5,PDC13,GPR55,NSUN2,HKDC1,ADAMTS16,ACOXL,TNFSF11,FYN,ADGRL2,SCN8A,ALB,ATP9B,NALCN,PABPC1,SLC39A8,POTEJ,CDH2,FBXL20,GPR137B,EPHB1,RP1L1,GRM5,ADCK1,SPTB,TBC1D1,PID1,NRP1,FCHSD2,PRKCA,IFT46,ITGA1,RC3H1,POR,BCR,TUT4,NRXN3,FBLN1,MB,RAG1,GNA14,EPHB2,CD38,MYO5B,MET,SPPL3,ATP6V0D2,PPFIA2,STXBP4,SERPINB2,CACNG3,ATG5,VMPI,FLRT2,KALRN,SLC1A2,GNAS,MFHAS1,CPQ,DLG5,GABRA2,AK3,TMEM25,ADGRF5,PDGFC,ABL2,BACE2,PHOD3,SLIT2,TMPRSS3,CNOT7,PLCL1,ERBB4,IL20RB,FAM3B,TRHDE,SYNDIG1,SAMD4A,PRKCQ,SORCS2,TRDN,NLGN1,CTTNBP2,NOS1,SLC6A3,PRR16,ASIC2,EFNA5,RAB27A,EHMT1,ESR1,CYP2C8,CACNA2D1,PRLR,AGO3,HTT,LARS2,FOX1,FER,EYA2,CCR2,FGGY,CHFR,EPS8,SEMA4B,HRH1,ROCK2,RORA,HERPUD1,HSD17B2,PCSK2,FSTL4,BARD1,PNPLA3,STK3,DEPTOR,ZNF423,C1QL3,PNPLA8,HNRNPU,CADPS,IGF1R,THRB,MORC3,ATP10A</p> |
| GO:0048583 | regulation of response to stimulus | 8.258946726337699e-15 | <p>NOTCH2,BCAR3,MTOR,WWC1,GARNL3,PTPRD,MYO9A,NLK,KSR1,PLCB1,ZNF536,TAF1A,DLC1,RIPOR2,PDE4D,RDX,STXBP1,BCL2,PRDM16,ARHGAP26,FBN1,CHRNA7,ROBO2,RIMS1,EPC2,SPIRE1,ZEB1,AKR1C3,FGD4,SPRED1,MINAR1,RIMS2,ALK,AUTS2,MCTP1,PJA2,BABAM2,ERBIN,ANO6,CACNG2,DLGAP1,MLLT3,GPC6,SUSD4,APC,HHLA2,DSCAM,CRKL,SETD2,ARHGAP24,TNIK,PTPRJ,KDM4C,NEK4,EGFR,DENND1A,USP14,ANGPT1,MACF1,PRKACB,RGS3,NCOR1,RNF220,DOCK2,NEDD4,SCAI,SGMS1,CHSY1,N</p>                                                                                                                                                                                                                                                                                                                                                                                                                                                                                                                                                                                                                                                                                                                                                                                                                                                                                                                                                                                                                                                                                                                                                                                                                                                                                                                                                                                                                                                                                                                                                                                                                                                                                                                                                                                                                                                                                                                                                                                                                                                                                                                                                                                                                                                                                                                                                                                                                                                                                                                                                                                                                                 |

|  |  |  |                                                                                                                                                                                                                                                                                                                                                                                                                                                                                                                                                                                                                                                                                                                                                                                                                                                                                                                                                                                                                                                                                                                                                                                                                                                                                                                                                                                                                                                                                                                                                                                                                                                                                                                                                                                                                                                                                                                                                                                                                                                                                                                                                                                                                                                                                                                                                                                                                                                                                                                                                                                                                                                                                                                                                                                                                                                                                                                                                                                                                                                                                                                                                                                                                                                                                                                                                                                                                                                                                                                                                                                                                                                                                                                                                                                                                                                                                                                                                                                                                                                                                                                                                                                                                                                                                                                                                                                                                                                                                                                                                                                                                                                                                                                                                                                                                                                                                          |
|--|--|--|------------------------------------------------------------------------------------------------------------------------------------------------------------------------------------------------------------------------------------------------------------------------------------------------------------------------------------------------------------------------------------------------------------------------------------------------------------------------------------------------------------------------------------------------------------------------------------------------------------------------------------------------------------------------------------------------------------------------------------------------------------------------------------------------------------------------------------------------------------------------------------------------------------------------------------------------------------------------------------------------------------------------------------------------------------------------------------------------------------------------------------------------------------------------------------------------------------------------------------------------------------------------------------------------------------------------------------------------------------------------------------------------------------------------------------------------------------------------------------------------------------------------------------------------------------------------------------------------------------------------------------------------------------------------------------------------------------------------------------------------------------------------------------------------------------------------------------------------------------------------------------------------------------------------------------------------------------------------------------------------------------------------------------------------------------------------------------------------------------------------------------------------------------------------------------------------------------------------------------------------------------------------------------------------------------------------------------------------------------------------------------------------------------------------------------------------------------------------------------------------------------------------------------------------------------------------------------------------------------------------------------------------------------------------------------------------------------------------------------------------------------------------------------------------------------------------------------------------------------------------------------------------------------------------------------------------------------------------------------------------------------------------------------------------------------------------------------------------------------------------------------------------------------------------------------------------------------------------------------------------------------------------------------------------------------------------------------------------------------------------------------------------------------------------------------------------------------------------------------------------------------------------------------------------------------------------------------------------------------------------------------------------------------------------------------------------------------------------------------------------------------------------------------------------------------------------------------------------------------------------------------------------------------------------------------------------------------------------------------------------------------------------------------------------------------------------------------------------------------------------------------------------------------------------------------------------------------------------------------------------------------------------------------------------------------------------------------------------------------------------------------------------------------------------------------------------------------------------------------------------------------------------------------------------------------------------------------------------------------------------------------------------------------------------------------------------------------------------------------------------------------------------------------------------------------------------------------------------------------------------------------------|
|  |  |  | <p> TRK3 , C5 , ZFAND6 , DKK2 , FLT1 , MAPKBP1 , AOA , DGKI , INVS , C12<br/> ORF4 , EDAR , NEO1 , CNTN6 , SLC8A3 , PRKD1 , TPTE2 , PAK1 , EPHA7 ,<br/> NCOA7 , RALGPS1 , RAPGEF2 , PELI2 , LRP2 , RUNX2 , TAOK3 , ONECUT<br/> 1 , TAF4A , RPTOR , GHR , RALGAPA1 , ADAM10 , IL1R1 , APP , SAMS1 ,<br/> MTUS1 , DOCK8 , MAPRE2 , USP18 , SEMA5A , ARHGAP44 , NTF3 , NDUFA<br/> F2 , CD2AP , AURKA , PTPRR , KANK1 , MAP4K4 , BMPR1B , FMN2 , PCSK6<br/> , AKAP6 , HOMER2 , CTNNA2 , ARNT , PAK3 , RFTN1 , ITPKB , RGS20 , PD<br/> E10A , RAP1GDS1 , KICS2 , PRKCZ , BTLA , GRB10 , MCPH1 , ARHGAP32<br/> , RGS9 , HECW1 , DUSP22 , YAP1 , MAPK1 , MGAT5 , USP25 , PLG , PDGFD<br/> , ZNRF3 , ARHGEF17 , UBE20 , NCAM1 , SPIDR , MICU1 , CORO2B , STK3<br/> 8 , PTPN13 , CHN1 , HRH4 , PAFAH1B1 , ATF6 , NF2 , CNKSR2 , CTNNA1 ,<br/> MOB3B , BIRC6 , AKAP9 , KLF15 , RASGRF2 , PPARA , ADAMTS3 , TIAM1<br/> , GRM1 , ARHGEF12 , PAK5 , PCDH11Y , PLA2R1 , SEMA3C , DAPK1 , SLC<br/> 24A4 , SEC14L1 , VPS13C , TMEM108 , ALPK2 , JARID2 , RIC8B , IL34<br/> , ADGRV1 , BBS2 , NKG7 , SEMA6D , DUSP16 , SMARCA4 , USP8 , MAPKAP<br/> 1 , SPG21 , BLK , TNF , MBD5 , NUK1 , PTPRT , ABL1 , PTPN12 , HDAC4 ,<br/> OXR1 , PRKAA1 , GAS2 , LRFN5 , DROSHA , APLF , NFAT5 , GUCY1A2 , RA<br/> PIA , GPC5 , FGF10 , ZC3H4V1 , GRID2 , LATS2 , NRG1 , INO80D , GSG1<br/> L , ASPM , AP3B1 , DENND2B , RASGRF1 , ZNF675 , GNG7 , PRKCE , NXN ,<br/> WNK2 , USP33 , DENND4C , FBN2 , CD44 , RGS12 , PTPRO , EGF , TRIO , P<br/> DE3A , LIMD1 , SPRED2 , RPS6KA3 , CTNND2 , PTPN2 , TRIM5 , MCF2L ,<br/> ATXN3 , HTR2C , CLEC16A , CD96 , LTBP1 , OPRM1 , HTR2A , FANCA , KR<br/> EMEN1 , SEMA3E , GCSAML , FHL2 , CNH3 , PUM1 , TMOD2 , MSH2 , ANK<br/> D17 , RELL1 , HIPK3 , EPN2 , EVC , GRK3 , MOSMO , RBBP8 , MDFIC , EMI<br/> LIN2 , HMGA2 , CCND3 , PLCE1 , TGFA , IL17RA , HIP1 , CRIM1 , PRR5L<br/> , VAV1 , FBXO32 , LDLRAD4 , NPHP4 , HLA-<br/> B , IQSEC1 , SNX3 , BRCA2 , DISC1 , NRK , SEMA3A , MAGI3 , BMP2 , RC3<br/> H2 , PSG9 , GNAI1 , RALGAPA2 , RANBP9 , RIN3 , BMP2K , TMEM161A , S<br/> EMA3D , NETO2 , LEMD3 , RELN , ARHGAP42 , HMGB1 , GNAQ , FGF9 , NFA<br/> TC2 , TRAF3 , UNC13B , TTC21B , DSTYK , UIMC1 , RAP1GAP , SRGAP2 ,<br/> DRAXIN , SLAMF1 , SMARCA2 , ETS1 , GLI3 , CGAS , SMARCC1 , SNX6 , S<br/> MOC2 , CNKSR3 , CASP5 , PSD3 , GAREM1 , LAMC1 , NEK10 , CYLD , BBS4<br/> , MAPK8IP1 , KPNA1 , UBASH3A , NEU3 , KITLG , DNAJC7 , CAMTA1 , UB<br/> R1 , SLC30A10 , RCAN1 , DAB1 , SELENON , RB1CC1 , PTPRE , PRKN , MT<br/> MR2 , TBX20 , DLGAP2 , AFAP1 , MAPK10 , DPF3 , NGEF , GRIN2A , PRKC<br/> H , IL6R , ALS2 , RACGAP1 , NLRC5 , SNX25 , FBLN5 , SHISA9 , SHANK2<br/> , USP7 , VAV3 , PSMA1 , ENPP3 , SOX30 , KIR2DL4 , ARHGEF28 , NPAS2<br/> , ROCK1 , LYN , ARHGAP28 , ARHGAP31 , EIF2B3 , SLC44A2 , SLC15A2<br/> , DTX1 , OVOL2 , RRAGD , ARID1B , CRACR2A , RNF152 , OTUD7A , INSR<br/> , YTHDF3 , DEDD2 , NEK6 , ARFGEF1 , SNAI2 , ASH1L , IGHV3-<br/> 74 , BID , SIAH2 , TRABD2B , UFD1 , ERN2 , MBTPS2 , TIAL1 , PLPP4 , N<br/> REP , ZDHHC17 , NSD2 , CD9 , RALGPS2 , JCAD , SAMHD1 , IFT81 , ENPP<br/> 1 , RASGRP1 , IGSF11 , NDRG2 , CSNK2A1 , BMP5 , CSF1 , GHRH , BCL2L<br/> 1 , SERPINB9 , CTDP1 , PRKG1 , GRIN2B , GRB14 , INO80 , FANCB , IGH<br/> V2-<br/> 70D , DHRS3 , CELF4 , PRAME , TNN , MED1 , IL33 , AJAP1 , ROR2 , CFH ,<br/> KL , BANK1 , IL10 , ACTR2 , SFPQ , PTH , SOSTDC1 , PRKAA2 , NDC80 , I<br/> TPRIP , PLA2G4A , IQGAP1 , RPS12 , SREBF2 , YBX3 , FYB2 , NRXN1 , P<br/> CID2 , HIPK1 , CIBAR1 , PBLD , FICD , CADM1 , PEG10 , NET1 , SIPA1L<br/> 2 , TWIST1 , AKT3 , ALKAL2 , JAK2 , RPF2 , FSTL1 , MADD , HCRTR1 , CR<br/> EBBP , TNKS , GORAB , PCNA , UFL1 , NFKBIA , PRKCB , ABCC8 , BRD4 , N<br/> EDD9 , ITGA6 , ATP2B1 , IGHV10R15-<br/> 9 , OTOP1 , CIDEA , ARFGEF3 , GID8 , STAT1 , BRMS1L , NDFIP2 , NR2C<br/> 1 , MAP2K6 , DGKG , MTPN , CCBE1 , PARK7 , ADAMTS18 , MAPK8 , FBXL1<br/> 7 , ADCYAP1R1 , NCAPG2 , MYOCD , CYFIP2 , EFHB , MEF2C , RXRA , WNT<br/> 7A , RBPM5 , MAP3K5 , NDFIP1 , MAP3K4 , S100B , ATP6V1C2 , C16OR<br/> F72 , RAD51AP1 , PDE2A , SDCBP , JPT2 , SPPL2B , NSMCE1 , WWOX , NC<br/> K1 , FGR , CDCA8 , PPP2R3A , DNMBP , C2 , RNF8 , EPHA4 , CYTH4 , MECO<br/> M , NTRK2 , COLEC12 , TNNI1 , OCLN , POSTN , SHISA6 , IL17RD , MVB1<br/> 2B , PTK2 , CDH5 , CD5L , ANKRD6 , NFKBID , ARHGAP12 , LAMB1 , APIP<br/> , CYFIP1 , UBE3A , SEMA4D , C9 , WNT5B , AMFR , NENF , SH2D1B , NOS1<br/> AP , TPTE , CCDC88A , GPR55 , CHCHD2 , BICD1 , TNFSF11 , FYN , PPM1<br/> F , RBMS3 , HDAC2 , SLF1 , DOCK3 , DOK5 , ZFYVE28 , MAPK9 , CRTAM , A<br/> PELA , ROR1 , FUT8 , TET1 , CDH2 , ITGA8 , RAD9A , PHLPP1 , GPR137B<br/> , EPHB1 , GRM5 , RAI14 , TBC1D1 , PID1 , NRP1 , PRKCA , FAIM , ITGA1<br/> , RC3H1 , POR , MCC , SUPT3H , BCR , RGS6 , ELP2 , FBLN1 , STK36 , RAG </p> |
|--|--|--|------------------------------------------------------------------------------------------------------------------------------------------------------------------------------------------------------------------------------------------------------------------------------------------------------------------------------------------------------------------------------------------------------------------------------------------------------------------------------------------------------------------------------------------------------------------------------------------------------------------------------------------------------------------------------------------------------------------------------------------------------------------------------------------------------------------------------------------------------------------------------------------------------------------------------------------------------------------------------------------------------------------------------------------------------------------------------------------------------------------------------------------------------------------------------------------------------------------------------------------------------------------------------------------------------------------------------------------------------------------------------------------------------------------------------------------------------------------------------------------------------------------------------------------------------------------------------------------------------------------------------------------------------------------------------------------------------------------------------------------------------------------------------------------------------------------------------------------------------------------------------------------------------------------------------------------------------------------------------------------------------------------------------------------------------------------------------------------------------------------------------------------------------------------------------------------------------------------------------------------------------------------------------------------------------------------------------------------------------------------------------------------------------------------------------------------------------------------------------------------------------------------------------------------------------------------------------------------------------------------------------------------------------------------------------------------------------------------------------------------------------------------------------------------------------------------------------------------------------------------------------------------------------------------------------------------------------------------------------------------------------------------------------------------------------------------------------------------------------------------------------------------------------------------------------------------------------------------------------------------------------------------------------------------------------------------------------------------------------------------------------------------------------------------------------------------------------------------------------------------------------------------------------------------------------------------------------------------------------------------------------------------------------------------------------------------------------------------------------------------------------------------------------------------------------------------------------------------------------------------------------------------------------------------------------------------------------------------------------------------------------------------------------------------------------------------------------------------------------------------------------------------------------------------------------------------------------------------------------------------------------------------------------------------------------------------------------------------------------------------------------------------------------------------------------------------------------------------------------------------------------------------------------------------------------------------------------------------------------------------------------------------------------------------------------------------------------------------------------------------------------------------------------------------------------------------------------------------------------------------------------------------|

|            |                                         |                        |                                                                                                                                                                                                                                                                                                                                                                                                                                                                                                                                                                                                                                                                                                                                                                                                                                                                                                                                                                                                                                                                                                                                                                                                                                                                                                                                                                                                                                                                                                                                                                                                                                                                                                                                                                                                                                                                                                                                                                                                                                                                                                                                                                                                                                                                                                                                                                                                                                                                                                                                                                                                                                                                                                                                                                                                                                                                                                                                                                                                                                                                                                                                                                                                                                                                                                                                                                    |
|------------|-----------------------------------------|------------------------|--------------------------------------------------------------------------------------------------------------------------------------------------------------------------------------------------------------------------------------------------------------------------------------------------------------------------------------------------------------------------------------------------------------------------------------------------------------------------------------------------------------------------------------------------------------------------------------------------------------------------------------------------------------------------------------------------------------------------------------------------------------------------------------------------------------------------------------------------------------------------------------------------------------------------------------------------------------------------------------------------------------------------------------------------------------------------------------------------------------------------------------------------------------------------------------------------------------------------------------------------------------------------------------------------------------------------------------------------------------------------------------------------------------------------------------------------------------------------------------------------------------------------------------------------------------------------------------------------------------------------------------------------------------------------------------------------------------------------------------------------------------------------------------------------------------------------------------------------------------------------------------------------------------------------------------------------------------------------------------------------------------------------------------------------------------------------------------------------------------------------------------------------------------------------------------------------------------------------------------------------------------------------------------------------------------------------------------------------------------------------------------------------------------------------------------------------------------------------------------------------------------------------------------------------------------------------------------------------------------------------------------------------------------------------------------------------------------------------------------------------------------------------------------------------------------------------------------------------------------------------------------------------------------------------------------------------------------------------------------------------------------------------------------------------------------------------------------------------------------------------------------------------------------------------------------------------------------------------------------------------------------------------------------------------------------------------------------------------------------------|
|            |                                         |                        | <p>1, BMPER, PRDM15, SRGAP3, MACROH2A1, EPHB2, CSNK1G1, CD38, EYA4, CDK14, MET, SPPL3, CDH13, SERPINB2, CACNG3, ATG5, MAGI2, PRDM11, MLIP, MYB, KALRN, GNAS, LAMA1, MFHAS1, TIAM2, BMP7, DLG5, ZMYND11, TMEM25, PDGFC, WDR41, ABL2, MMP26, PARPB, EYA1, SLIT2, CNOT7, KCTD8, ERBB4, IL20RB, ROBO1, PRKCQ, SIPA1L3, MGMT, NLGN1, SHLD2, SLC6A3, ARHGEF11, SLIT3, ESR1, MYO9B, IGLC3, IQCJ-SCHIP1, PRLR, AGO3, HTT, CAMK1D, HLA-F, FER, EYA2, CCR2, STARD13, A2M, EPS8, SEMA4B, IGHV10R21-1, ROCK2, RORA, IL16, DMRT1, RGS8, HERPUD1, RGS7, KIF7, FSTL4, BARD1, STK3, DEPTOR, ZNF423, PNPLA8, APCDD1, IGF1R, GLI2, THRB, AKAP13, DNML</p>                                                                                                                                                                                                                                                                                                                                                                                                                                                                                                                                                                                                                                                                                                                                                                                                                                                                                                                                                                                                                                                                                                                                                                                                                                                                                                                                                                                                                                                                                                                                                                                                                                                                                                                                                                                                                                                                                                                                                                                                                                                                                                                                                                                                                                                                                                                                                                                                                                                                                                                                                                                                                                                                                                                            |
| GO:0048522 | positive regulation of cellular process | 1.7817562744196112e-14 | <p>NOTCH2, BCAR3, BRINP3, MTOR, NSG1, WWC1, ABCA13, PTPRD, SLC24A2, ULK2, FTO, KSR1, MGA, PLCB1, SVIL, CLTCL1, ZFPM2, TENM4, DLC1, TNRC6B, DPP10, RIPOR2, RDX, RP1, STXBP1, RALA, BCL2, KCNMA1, PRDM16, ALDH1A2, CHRNA7, ROBO2, RIMS1, EPC2, SPIRE1, TENM3, ZEB1, AKRIC3, RARB, SPRED1, CDC42EP3, RIMS2, ALK, AUTS2, FOXJ2, CARMIL1, PJA2, BABAM2, GLIS3, FANK1, ERBIN, RIN2, ANO6, CACNG2, NEGR1, MLLT3, CNTNAP2, MAP3K9, APC, HHLA2, TSHZ3, PLPPR5, DSCAM, TCF4, CRKL, SOX5, ERG, TNK1, PTPRJ, KDM4C, NEK4, EGFR, RFX3, ANGPT1, CDK12, BACH1, MACF1, NEK7, RNF220, ZNF407, NEDD4, MAML2, NSMCE2, BCL11A, SOX6, CHSY1, FLI1, CDH4, NTRK3, DKK2, FLT1, RFC3, TASP1, THRAP3, MAPKBP1, DGKI, EDAR, CRACD, NEO1, CNTN6, SLC8A3, PRKD1, PAK1, EPHA7, NCOA7, SPEN, RAPGEF2, PELI2, LRP2, ADGRB3, RUNX2, ARSB, TAOX3, ONECUT1, UBE2L3, LDB2, CCL28, SMYD3, SEPTIN9, RPTOR, GHR, SSBP3, NEDD4L, ADAM10, HDAC9, ZHX3, ATF7IP, IL1R1, APBB2, APP, RPS6KA2, KDM1B, CACNB2, STAU2, DOCK8, MAPRE2, ZNF600, SEMA5A, SYT1, NTF3, ACER2, CD2AP, AURKA, PARN, ST18, PYGO1, SLC8A1, SSBP2, SRGAP2C, ANKRD31, FIG4, DUX4, KANK1, MAP4K4, ABCD2, BMPR1B, FMN2, AKAP6, ZNF717, ARNT, RAB8B, PAK3, RANBP2, LARP1, ITPKB, TRPC5, UBE2E2, DNM3, NBN, SCP2, PRKCZ, GRB10, TAF15, RAB27B, CNST, PHF19, MRTFA, TAF4B, COBL, DUSP22, EBF2, YAP1, NFIA, SHC4, BRINP1, MAPK1, MGAT5, CADPS2, KMT2E, PCGF5, PDGFD, SYT10, NRG3, UBE2O, ANKFY1, GFRA1, NIPBL, SPIDR, GABPA, CORO2B, CHD6, MYLK3, KANSL1, GLP2R, LIMCH1, FMN1, PAFAH1B1, ATF6, TM7SF3, VPS13D, TPM1, NF2, LRRC38, HIVEP1, CTNNA1, MOB3B, BIRC6, AKAP9, KLF15, RASGRF2, PPARA, MEIS2, SNX30, NFIB, MRTFB, SYNJ1, NR5A2, ADAMTS3, TIAM1, GRM1, FOXJ3, TRERF1, PCDH11Y, PLA2R1, EIF3D, SEMA3C, DAPK1, NAV3, TMEM108, AGO2, MAGI1, JARID2, GATAD2B, IL34, ANK2, ADGRV1, MELK, BCAS3, RYR2, SYNE2, ZNF606, RANBP3L, SEMA6D, SMARCA4, USP8, PARD3, MAPKAP1, TNRC6C, PIAS1, TBC1D5, BLK, TNFR, DOCK4, MBD5, ATRX, ELAVL4, ABL1, HDAC4, SLC1A1, PRKAA1, MRPS27, APBB1IP, EIPR1, APLF, NFAT5, GUCY1A2, SLFN11, RAP1A, GLIS1, MYO10, GPC5, TOX3, CAMK4, CPSF3, FGF10, ZC3H4V1, GRID2, TGM1, LATS2, NRG1, INO80D, CLIP1, ASPM, AP3B1, DENND2B, RASGRF1, ATP11C, ZNF438, ABCB7, ZBTB16, MUSK, SH3GL3, SETDB2, PRKCE, FOXK2, SLCO3A1, MED15, WNK2, ESRRG, FBN2, CD44, EGF, PRRC1, PDE3A, NSMAF, SPRED2, RPS6KA3, ATP8A2, PTPN2, TRIM5, PLXNA2, MCF2L, ATXN3, RFC1, HTR2C, RIC3, CLEC16A, ARHGEF7, ALG10B, ATP8A1, AMBRA1, KDM7A, OPRM1, HTR2A, DAZL, GTF2F2, STAC, SEMA3E, TAF3, RPRD1B, MARK2, EBF3, ZNF33B, ABHD17C, PUM1, TMOD2, MSH2, EPHA6, ANKRD17, LINGO2, SH3KBP1, SLC2A13, RELL1, EPN2, EVC, KNDC1, CLSPN, NOS2, BICRAL, MNAT1, RBBP8, MDFIC, ANK3, EMILIN2, HMGA2, CCND3, BCL11B, DOCK5, ECIE1, CREM, PLCE1, TGFA, HIP1, FUT9, PRR5L, VAV1, TJP1, NPHP4, EGFLAM, CNTN1, HLA-B, IQSEC1, SNX3, CACNA1I, BRCA2, DISC1, BLM, SEMA3A, ADCY10, BMP2, RC3H2, MSR1, VRK1, GNAI1, GFI1B, RESF1, MYRIP, BMP2K, TMEM161A, SEMA3D, ASXL3, RELN, HMGB1, FGF9, NFATC2, SLC23A2, MYOM1, TRAF3, ZNF462, UNC13B, TTC21B, ETS2, DSTYK, UIMC1, DOCK1, PLS1, NIN, ATF1, SLAMF1, SMARCA2, ETS1, GLI3, CGAS, SMARCC1, SMOC2, PCP4, CNKSR3, VENTX, GRIK2, PRDM10, RERE, MAP2, GAREM1, LAMC1, NEK10, MOB1B, ATF2, CYLD, BBS4, MAPK8IP1, HIVEP3, PSIP1, CFTR, NELL1, RGM, NEU3, KITLG, CAMTA1, SLC30A10, GTF2I, RORB, TADA2A, DAB1, MED27, ZNF208, SELENON</p> |

|            |                           |                        |                                                                                                                                                                                                                                                                                                                                                                                                                                                                                                                                                                                                                                                                                                                                                                                                                                                                                                                                                                                                                                                                                                                                                                                                                                                                                                                                                                                                                                                                                                                                                                                                                                                                                                                                                                                                                                                                                                                                                                                                                                                                                                                                                                                                                                                                                                                                                                                                                                                                                                                                                                                                                                                                                                                                                                                                                                                                                                                                                                |
|------------|---------------------------|------------------------|----------------------------------------------------------------------------------------------------------------------------------------------------------------------------------------------------------------------------------------------------------------------------------------------------------------------------------------------------------------------------------------------------------------------------------------------------------------------------------------------------------------------------------------------------------------------------------------------------------------------------------------------------------------------------------------------------------------------------------------------------------------------------------------------------------------------------------------------------------------------------------------------------------------------------------------------------------------------------------------------------------------------------------------------------------------------------------------------------------------------------------------------------------------------------------------------------------------------------------------------------------------------------------------------------------------------------------------------------------------------------------------------------------------------------------------------------------------------------------------------------------------------------------------------------------------------------------------------------------------------------------------------------------------------------------------------------------------------------------------------------------------------------------------------------------------------------------------------------------------------------------------------------------------------------------------------------------------------------------------------------------------------------------------------------------------------------------------------------------------------------------------------------------------------------------------------------------------------------------------------------------------------------------------------------------------------------------------------------------------------------------------------------------------------------------------------------------------------------------------------------------------------------------------------------------------------------------------------------------------------------------------------------------------------------------------------------------------------------------------------------------------------------------------------------------------------------------------------------------------------------------------------------------------------------------------------------------------|
|            |                           |                        | <p>,RB1CC1,NMD3,PRKN,MTMR2,TBX20,DPF3,GRIN2A,ARID5B,ZBED9,PRKCH,FRMD4A,IL6R,FRMPD4,ALS2,RACGAP1,NLRC5,TDFP1,CNOT6L,TOX,SLC4A4,ZFP90,COPS8,SHANK2,ST8SIA1,USP7,VAV3,PLAGL1,MESD,ITSN2,SOX30,KIR2DL4,RALB,NPAS2,ROCK1,LYN,VCAM1,ZNF780B,SLC44A2,DTX1,TENM2,OVOL2,NTN1,ZFHX3,RRAGD,BANP,SUPT16H,ARID1B,HOXC13,CRACR2A,RNF152,BAZ1A,CASZ1,INSR,BMF,YTHDF3,DEDD2,NEK6,HECTD1,NMU,DDHD1,PBX3,SUMO2,ZNF292,PDE4DIP,SNAI2,ASH1L,IGHV3-74,HOXC4,BID,TRABD2B,RXRG,SP3,ERN2,MBTPS2,TRIM58,TIAL1,ELF2,ZDHHC17,NSD2,FYCO1,SH3GLB1,CARD10,JCAD,TWIST2,CTIF,UTRN,RASGRP1,IGSF11,SNX9,CSNK2A1,BMP5,KCNC1,CSF1,GHRH,BCL2L1,ASB4,GRIN2B,INO80,FANCB,IGHV2-70D,CLNS1A,SMAD5,CELF4,TCERG1,ABCG1,SLC40A1,PRAME,TNN,LPGAT1,MICALL2,MED1,CDC14B,PCNT,IL33,GPRC5C,ROR2,ZNF521,KL,BANK1,CSDE1,LMX1A,IL10,ACTR2,SFPQ,PRAMEF25,RIOK1,CLSTN2,PTH,PRKAA2,CSF2RB,NDC80,LARP6,VSTM2A,MAP6,VASP,PLA2G4A,ETV6,IQGAP1,RPS12,ZBTB7C,TEAD1,MORC2,SREBF2,ANP32B,YBX3,AIMP1,NRXN1,PCID2,HIPK1,CD70,CIBAR1,CADM1,CENPE,LMX1B,NET1,ANLN,TWIST1,AKT3,ALKAL2,JAK2,ZBTB38,MADD,HCRTR1,PATL1,ZNF287,PRSS2,CREBBP,MELTF,TNKS,GORAB,PCNA,UFL1,NFKBIA,PRKCB,ABCC8,RFC2,ALX4,RTRAF,BRD4,NEDD9,OLFM4,ITGA6,ASS1,MTCL1,GRIPI1,IGHV10R15-9,CTNBNB1,SAR1A,HPSE2,ZBTB49,EXOC1,KRT6A,STOX2,AGO1,MEOX2,GID8,ELL2,STAT1,NDFIP2,NR2C1,MAP2K6,MTPN,ABI1,CEMIP,PRAMEF2,IMPACT,CCBE1,PARK7,MAPK8,ITGA4,OAZ2,MED12L,POU1F1,UBE2J2,ADCYAP1R1,MTF2,NCAPG2,TM9SF4,MYOCD,CEP120,CYFIP2,ARID3B,MEF2C,ADGRB1,RXRA,WNT7A,RBPMS2,MAP3K5,NDFIP1,MAP3K4,WASF3,S100B,ZNF112,ATP6V1C2,MAGEL2,PKN2,RAD51AP1,RAB38,DBF4B,FBXW8,SDCBP,NSMCE1,WWOX,PASK,NCK1,SCAF8,FGR,CDCA8,PPP2R3A,MLLT10,IFNAR1,RNF8,EPHA4,MECOM,DNMT3L,NTRK2,IL1RAPL1,NUMB,ADAMTS9,OCLN,CREB5,CD101,MEGF10,FBXO31,EXTL3,PTK2,MARK4,CDH5,CD5L,ANKRD6,SCGN,NFKBID,ASCL3,MPP7,DIAPH1,LAMB1,CYFIP1,UBE3A,SEMA4D,JAM2,ZBTB20,RUNX1,KIRREL1,WNT5B,SAXO1,NENF,POMT2,PTGFR,ZNF845,ASAP1,EDIL3,NOS1AP,PDCL3,CCDC88A,GPR55,CHCHD2,BTCD1,TNFSF11,FYN,KDM5A,PPM1F,ADGRL2,HDAC2,SLF1,TBX15,SH2D3C,DOCK3,NC1,CS1,DOK5,MAPK9,PABPC1,CRTAM,APELA,ROR1,TET1,ARNT2,CDH2,ITGA8,RAD9A,GPR137B,EPHB1,GRM5,ADCK1,RPS6KA5,PID1,NRP1,FCHSD2,PRKCA,ATPCKMT,FAIM,ITGA1,ZNF615,KLF12,RC3H1,NRIP1,CHODL,POR,ZNF850,SUPT3H,TUT4,PRIM2,FBLN1,STK36,RAG1,RRAS2,BMPER,PRDM15,CUX1,MACROH2A1,MITF,EPHB2,TOGARAM1,CSNK1G1,CD38,EYA4,MET,SPPL3,CDH17,CDH13,STXBP4,CACNG3,MAGI2,PRDM11,VMP1,MLIP,FLRT2,MYB,KALRN,SLC1A2,GNAS,LAMA1,MFHAS1,SERPINB7,TIAM2,DHX29,BMP7,DLG5,TNFAIP8,RNF217,BPTF,BTBD10,NUDT21,KMT2C,ADGRF5,PDGFC,ABL2,RFX2,EYA1,SLIT2,CNOT7,ERBB4,GAP,SYNDIG1,ROBO1,SAMD4A,PBX1,NPAS3,PRKCQ,TRDN,GMGT,NLGN1,SHLD2,NOS1,PRR16,ASIC2,EFNA5,TCF12,ARHGEF11,RAB27A,NSD1,FRMD5,ESR1,LOXL2,CACNA2D1,IGLC3,IQCF-SCHIP1,PRLR,AGO3,HTT,RAD51B,CAMK1D,PIK3R3,HLA-F,FER,EYA2,CCR2,CHFR,ZNF721,EPS8,SEMA4B,NRF1,IGHV10R21-1,HRH1,ROCK2,RORA,STMP1,ATAT1,DMRT1,CDCA5,RAB31,HERPUD1,NCOA6,WASHC1,RGS7,KIF7,BARD1,STK3,ZNF423,RSU1,HNRNPU,RAB3GAP2,CADPS,IGF1R,PRKAG2,GLI2,THRB,AKAP13,MORC3,ATP10A,DNM1L</p> |
| GO:0007010 | cytoskeleton organization | 2.0493605902560283e-14 | <p>NOTCH2,MTOR,NEBL,LRRCA9,SVIL,TLN2,MICAL3,DLC1,RIPOR2,RDX,RP1,RALA,BCL2,MYO5A,ODAD2,ARHGAP26,SPIRE1,CNTLN,SDCCAG8,FGD4,SPAG16,MYO1E,CEP192,CDC42EP3,AUTS2,CARMIL1,ERBIN,RHPN2,PARVB,MAP4,APC,ZMYM4,MYO5C,SETD2,TNIK,MACF1,CTNNA3,NEK7,NCOR1,DOCK2,DIAPH3,CECR2,ARMC2,NTRK3,PHACTR1,CRACD,SLC39A12,PAK1,DEUP1,LRGUK,EPB41L3,KIF4A,TBCD,PHACTR2,DCLK1,STAU2,MAPRE2,SEMA5</p>                                                                                                                                                                                                                                                                                                                                                                                                                                                                                                                                                                                                                                                                                                                                                                                                                                                                                                                                                                                                                                                                                                                                                                                                                                                                                                                                                                                                                                                                                                                                                                                                                                                                                                                                                                                                                                                                                                                                                                                                                                                                                                                                                                                                                                                                                                                                                                                                                                                                                                                                                                                   |



|            |                          |                       |                                                                                                                                                                                                                                                                                                                                                                                                                                                                                                                                                                                                                                                                                                                                                                                                                                                                                                                                                                                                                                                                                                                                                                                                                                                                                                                                                                                                                                                                                                                                                                                                                                                                                                                                                                                                                                                                                                                                                                                                                                                                                                          |
|------------|--------------------------|-----------------------|----------------------------------------------------------------------------------------------------------------------------------------------------------------------------------------------------------------------------------------------------------------------------------------------------------------------------------------------------------------------------------------------------------------------------------------------------------------------------------------------------------------------------------------------------------------------------------------------------------------------------------------------------------------------------------------------------------------------------------------------------------------------------------------------------------------------------------------------------------------------------------------------------------------------------------------------------------------------------------------------------------------------------------------------------------------------------------------------------------------------------------------------------------------------------------------------------------------------------------------------------------------------------------------------------------------------------------------------------------------------------------------------------------------------------------------------------------------------------------------------------------------------------------------------------------------------------------------------------------------------------------------------------------------------------------------------------------------------------------------------------------------------------------------------------------------------------------------------------------------------------------------------------------------------------------------------------------------------------------------------------------------------------------------------------------------------------------------------------------|
|            |                          |                       | A, ARHGAP44, NTF3, CD2AP, AURKA, SRGAP2C, FRMD3, CCSER2, KANK1, FMN2, THSD7A, CTNNA2, PAK3, TTLL7, RAP1GDS1, PRKCZ, CALD1, KLHL1, MCPH1, MRTFA, COBL, SENP6, MAPK1, ABLIM1, ARHGEF17, SLC16A1, CORO2B, MYLK3, LIMCH1, FMN1, PAFAH1B1, TPM1, NF2, CTNNA1, PPP1R9A, AKAP9, MPRIP, ENAH, PAK5, PARD3B, NAV3, ANK2, STAG2, BRWD1, BCAS3, SYNE2, BBS2, AIF1L, LDB3, PARD3, MAPKAP1, DST, CXADR, ATRX, XIRP2, ABL1, PRKAA1, GAS2, TTL5, MAST4, DNAH5, FGF10, CLIP1, ASPM, PRKCE, PGM5, USP33, LMD1, PEX14, ATP8A2, ATXN3, ARHGEF7, SEMA3E, MARK2, TMEM67, C10ORF90, TMOD2, SH3KBP1, ANK3, MYOM2, PLCE1, ANKFN1, HIP1, TJP1, NPHP4, PACSIN2, IQSEC1, PDLIM5, BRCA2, DISC1, WDPCP, NRK, PHACTR3, CDC42BPB, GNAI1, RANBP9, DNAL1, TUBGCP3, RTTN, MDM1, PLS1, SRGAP2, NIN, HAUS6, DNAH8, KIF15, MAP2, DAW1, FARP1, ATF2, GOLGA8B, CYLD, BBS4, THSD7B, KIAA0753, CEP44, PRKN, CDC42BPA, AFAP1, PCDH15, PKP1, FRMPD4, RACGAP1, KANK4, MAP7, CFAP74, MYO1D, ROCK1, ARHGAP28, KIF11, NEK6, SHROOM3, ARFGEF1, PDE4DIP, FLNB, KRT6B, UTRN, SNX9, HDGFL3, KRT25, PRKG1, INO80, MICALL2, CDC14B, PCNT, FAT1, ACTR2, PRKAA2, SKA1, NDC80, MAP6, VASP, TACC2, KIFC1, IQGAP1, CENPE, TUBB6, ANLN, JAK2, TNKS, SGO1, SMTN, USH1C, NEDD9, MTCL1, EML1, MAST2, ARFGEF3, KRT6A, SHROOM2, MTPN, ABI1, ASB2, HMCN1, CEP120, CYFIP2, KRT85, WASF3, MAGEL2, SDCBP, NCK1, DRC7, CDCA8, INTS13, RSPH1, OCLN, AKAP11, TRPM7, PTK2, MARK4, CDH5, ARHGAP12, DIAPH1, CYFIP1, HOATZ, FRMD6, KIRREL1, SAXO1, PSTPIP2, NOS1AP, SORBS2, PDCL3, CCDC88A, SPAG6, BICD1, PPM1F, HYDIN, EHBP1, RP1L1, SPTB, NRP1, FCHSD2, BCR, ELMO1, STK36, TOGARAM1, MYO5B, MET, SPECC1, NRAP, FAM171A1, DNAH17, EPB41L4A, ABL2, FHOD3, TTLL11, SLIT2, NUF2, ANTXR1, SIPA1L3, TRDN, NLGN1, EFNA5, GAS2L1, ARHGEF11, FRMD5, IQCJ-SCHIP1, HTT, CFAP44, FER, STARD13, EPS8, ROCK2, ATAT1, WASHC1, HOOK3, HNRNPU, CEP72, AKAP13                                                                                                                                                                                                                                       |
| GO:0048513 | animal organ development | 5.020880141050604e-14 | NOTCH2, BCAR3, MTOR, CNTN4, SGCD, IMMP2L, FREM1, TRAPPC9, BNC2, NEBL, SMOC1, SCAPER, FTO, PLCB1, SVIL, ZFPM2, TENM4, DLC1, ZDHHC21, RIPOR2, RP1, BCL2, ODAD2, ALDH1A2, FBN1, ROBO2, TENM3, ZEB1, AKR1C3, RARB, SPRED1, ENPEP, MYO1E, USH2A, ALK, PAPP2, ANO6, NEGR1, MLLT3, GPC6, CNTNAP2, MYO3B, DSCAM, CRKL, ILDR2, SOX5, SETD2, SLC4A10, PTPRJ, DOCK10, EGFR, RFX3, ANGPT1, DOCK2, CRB1, SOX6, TMEM182, CECR2, CHSY1, FLI1, ATP2B2, NTRK3, LARGE1, RXFP1, PHACTR1, FLT1, ADAMTS6, EDAR, SLC8A3, EPHA7, RAPGEF2, LRP2, RUNX2, FGF12, CPS1, ONECUT1, TMEM38B, PRICKLE2, SLC24A3, LDB2, GHR, LUZP1, SSBP3, ADAM10, HDAC9, APP, ABCB5, RPS6KA2, CACNA1C, DCLK1, STAU2, TMC1, SEMA5A, SYT1, AURKA, PYGO1, SLC8A1, SRGAP2C, BMPR1B, AKAP6, CTNNA2, ARNT, ITPKB, IFT57, RBM47, PRKCZ, KLHL1, MCPH1, COL27A1, ZSWIM6, COBL, EBF2, YAP1, NFIA, MAPK1, CRISPLD2, KMT2E, PLG, PDGFD, ZNRF3, ABLIM1, NRG3, GFRA1, NIPBL, GABPA, FAT3, LCE1F, MYLK3, ACSBG1, FMN1, PAFAH1B1, ATF6, EFEMP1, DCAF1, ITGB8, TPM1, NF2, RBFOX1, CTNNA1, ANKRD11, BIRC6, KLF15, PPARA, MEIS2, NFIB, MRTFB, SYNJ1, NR5A2, TIAM1, KAZN, SEMA3C, SLC24A4, TMEM108, ALPK2, DNAH11, JARID2, CPE, IL34, ANK2, ADGRV1, MELK, RYR2, SYNE2, BBS2, WNT9B, RANBP3L, SEMA6D, ANKS6, SMARCA4, LDB3, MAPKAP1, BLK, TNR, CXADR, ATRX, XIRP2, ELAVL4, ABL1, HDAC4, SLC1A1, PRKAA1, GAS2, DROSHA, TTLL5, L3MBTL3, DNAH5, CAMK4, FGF10, GRID2, TGM1, LATS2, NRG1, ASPM, AP3B1, ATP11C, ZBTB16, ZNF675, SETDB2, FBN2, CD44, PTPRO, EGF, ALPK3, EXT1, COL5A3, SPRED2, ADAMTS2, NHS, ATP8A2, PTPN2, PLXNA2, ARHGEF7, AMBRA1, KDM7A, FANCA, CYP4A11, CNNM4, SEMA3E, ALPL, FHL2, HERC1, MSH2, CDIN1, LUC7L, EVC, KNDC1, MNAT1, SGCZ, MYLK2, XYLT1, HMGA2, BCL11B, ECE1, MBP, AK8, TRPS1, PLCE1, TGFA, VAV1, ZNF160, LDLRAD4, NPHP4, EGFLAM, CNTN1, HLAB, MTHFD1L, PDLIM5, BRCA2, DISC1, DNER, WDPCP, SLC10A7, SEMA3A, BMP2, RC3H2, PSG9, PTCD2, GFI1B, BMP2K, RNF38, SEMA3D, ASXL3, PDE6C, RELN, HMGB1, FGF9, TDRD7, CPAMD8, MDM1, ESRP1, TTC21B, DOCK1, TSPAN2, RAP1GAP, PLS1, SRGAP2, NIN, DRAXIN, SLAMF1, SMARCA2, ETS1, GLI3, MEGF11, SMARCC1, CASP5, CUL1 |

|            |                |                        |                                                                                                                                                                                                                                                                                                                                                                                                                                                                                                                                                                                                                                                                                                                                                                                                                                                                                                                                                                                                                                                                                                                                                                                                                                                                                                                                                                                                                                                                                                                                                                                                                                                                                                                                                                                                                                                                                                                                                                                                                                                                                                                                                                                                                                                                                                                                                                                                                                                                             |
|------------|----------------|------------------------|-----------------------------------------------------------------------------------------------------------------------------------------------------------------------------------------------------------------------------------------------------------------------------------------------------------------------------------------------------------------------------------------------------------------------------------------------------------------------------------------------------------------------------------------------------------------------------------------------------------------------------------------------------------------------------------------------------------------------------------------------------------------------------------------------------------------------------------------------------------------------------------------------------------------------------------------------------------------------------------------------------------------------------------------------------------------------------------------------------------------------------------------------------------------------------------------------------------------------------------------------------------------------------------------------------------------------------------------------------------------------------------------------------------------------------------------------------------------------------------------------------------------------------------------------------------------------------------------------------------------------------------------------------------------------------------------------------------------------------------------------------------------------------------------------------------------------------------------------------------------------------------------------------------------------------------------------------------------------------------------------------------------------------------------------------------------------------------------------------------------------------------------------------------------------------------------------------------------------------------------------------------------------------------------------------------------------------------------------------------------------------------------------------------------------------------------------------------------------------|
|            |                |                        | <p>, RERE, DAW1, LAMC1, ATF2, UMODL1, BBS4, LAMC3, HIVEP3, COL5A1, CFTR, NELL1, KITLG, DCC, RCAN1, RORB, DAB1, SELENON, RB1CC1, MYO3A, SH3PXD2A, TBX20, PCDH15, DPF3, GRIN2A, ARID5B, JPH1, ATXN1, CDH23, PRKCH, TG, IL6R, DMC1, LCE3B, TOX, PDE6A, SCN10A, SHANK2, ADGRG6, ROCK1, LYN, VCAM1, CTSB, LRIG1, DTX1, OVOL2, NTN1, MMP16, ZFH3, ARID1B, HOXC13, CRACR2A, INS R, HECTD1, PBX3, SNAI2, ASH1L, HOXC4, RXRG, SP3, MBTPS2, FLNB, TRIM58, NSD2, CERS3, KRT6B, ENPP1, UTRN, RASGRP1, DZANK1, NDRG2, BMP5, WDR72, KCNC1, CSF1, GHRH, BCL2L1, KRT25, CTDP1, HCN1, PRKG1, LAMA3, GRIN2B, CNMD, DHRS3, SMAD5, CELF4, SYNJ2, FOXN3, VSTM4, SLC40A1, MYCL, TNN, PSAP, MED1, ATG4B, KDM6A, ATRN, AJAP1, ROR2, KL, CSDE1, FAT1, LMX1A, TMEM178A, IL10, TTC39C, PTH, SOSTDC1, ETV6, TACC2, IQGAP1, TEAD1, ANP32B, YBX3, NRXN1, PCID2, HIPK1, CACYBP, CADM1, ANLN, TWIST1, AKT3, JAK2, VSX1, CELSR2, ARL11, GORAB, PCNA, UFL1, ADAMTS5, NFKBIA, SMTN, ALX4, USH1C, NEDD9, ITGA6, ATP2B1, ASS1, EML1, OTOP1, EXT2, KRT6A, STOX2, MEOX2, GRXCR1, STAT1, MAP2K6, CMTM7, SHROOM2, SLC6A11, MTPN, ABI1, MYO18B, ARMC6, CCBE1, ADAMTS18, ITGA4, FBXL17, POU1F1, CSMD1, NCAPG2, FOXP2, ASB2, MYOCD, CEP120, DHTKD1, KRT85, MEF2C, ADGRB1, RXRA, WNT7A, RBPMS2, NDFIP1, MAP3K4, PDE2A, FBXW8, SDCBP, NECTIN1, WWOX, FLVCR1, FGR, PPP2R3A, SPRR2D, LCE3D, EPHA4, GABRA5, MECOM, DNMT3L, NTRK2, FNDC3A, NUMB, LHX9, ADAMTS9, WNT2B, TNNI1, CD101, MEGF10, IL17RD, IREB2, HS6ST1, PTK2, ANKRD6, NFKBID, CLDN18, LAMB1, UBE3A, SEMA4D, FAT4, AP2B1, RUNX1, AKR1B1, WNT5B, SORBS2, GPR55, NSUN2, ADAMTS16, TNFSF11, FYN, ADGRL2, UNC45B, ARL13B, HYDIN, HDAC2, GON4L, TBX15, COL18A1, ATP5PF, UGP2, CRTAM, COL19A1, APELA, MDGA2, ROR1, ARNT2, CDH2, CNTN5, ITGA8, NTN4, XRN2, GPR137B, EPHB1, RP1L1, PTPRG, NRP1, SDK1, PRKCA, RC3H1, NRIP1, CHODL, POR, BCR, SNRK, STK36, MB, RAG1, B9D1, DGCR2, BMPER, MACROH2A1, MITF, EPHB2, IGSF3, SGCG, EYA4, MET, CDH17, ATG5, NRAP, MAGI2, ADAM29, FLRT2, MYB, KALRN, SLC1A2, GNAS, LAMA1, MFHAS1, GREB1L, SERPINB7, CA10, ATRNL1, BMP7, DLG5, KIRREL3, BPTF, NUDT21, ADGRF5, PDGFC, EYA1, FHOD3, SLIT2, EXOC4, CCDC141, ERBB4, ROBO1, PBX1, MYH15, SIPA1L3, MGMT, CTTNBP2, SLC6A3, TCF12, SLIT3, ESR1, NTNG1, KDM4B, LOXL2, PRLR, FOXB1, PIK3R3, MACROD2, FER, CCR2, RPGRIP1, A2M, SEMA4B, ROCK2, PRDM1, RORA, ATAT1, DMRT1, HSPG2, PTPRQ, NCOA6, HSD17B2, COL4A3, RGS7, HOOK3, STK3, ZNF423, ZNF568, HNRNPU, APCDD1, IGF1R, GLI2, THRB, AKAP13</p> |
| GO:0016477 | cell migration | 1.3656437665311091e-13 | <p>MTOR, SPOCK1, WWC1, LRP12, PLCB1, TAFA5, DLC1, RIPOR2, RDX, BCL2, SDCCAG8, SPRED1, ENPEP, USH2A, AUTS2, CARMIL1, MCTP1, ASTN1, RIN2, ANO6, GPC6, APC, CRKL, SETD2, ARHGAP24, PTPRJ, DOCK10, EGFR, ANGPT1, MACF1, CTNNA3, DOCK2, SCAI, NTRK3, C5, PHACTR1, FLT1, NEO1, PRKD1, PAK1, RAPGEF2, ARSB, ONECUT1, LDB2, TAFA4, CCL28, ADAM10, HDAC9, IL1R1, APP, MTUS1, DCLK1, DOCK8, MAPRE2, SEMA5A, VCL, NTF3, CD2AP, SLC8A1, PTPRR, SRGAP2C, SRGAP2B, KANK1, MAP4K4, CTNNA2, PAK3, PRKCZ, GRB10, MRTFA, DUSP22, MAPK1, MGAT5, PLG, PDGFD, ITGBL1, NRG3, GFR A1, NIPBL, FAT3, LIMCH1, PAFAH1B1, ITGB8, TPM1, NF2, AVL9, CTNNA1, TIAM1, PTPRK, PAK5, SEMA3C, NAV3, AGO2, IL34, BCAS3, SYNE2, SEMA6D, TNFR, CXADR, DOCK4, PTPRT, ABL1, HDAC4, SDC2, GPC5, FGF10, PEAK1, NRG1, ASPM, PRKCE, USP33, CD44, PTPRO, EGF, EXT1, LIMD1, PLXNA2, ARHGEF7, ATP8A1, BIN2, SEMA3E, MARK2, GCSAML, SH3KBP1, STK10, EMILIN2, BCL11B, DOCK5, IL17RA, FUT9, PRR5L, VAV1, TJP1, LDLRAD4, IQSEC1, DISC1, DNER, WDCP, SEMA3A, BMP2, UNC5D, CDC42BPB, RIN3, SEMA3D, RELN, HMGB1, FGF9, NFATC2, DOCK1, SRGAP2, SLAMF1, ETS1, GLI3, SMOG2, RERE, LAMC1, UMODL1, BBS4, LAMC3, COL5A1, ITGA9, KITLG, DCC, DAB1, CDC42BPA, TBX20, DACH1, LYST, ARID5B, IL6R, PTPRB, VAV3, ROCK1, LYN, VCAM1, OVOL2, NTN1, INSR, YTHDF3, SNAI2, CD9, CARD10, JCAD, TWIST2, BMP5, CSF1, PRKG1, LAMA3, VSTM4, TNN, ATRN, IL33, ROR2, FAT1, IL10, TSPAN11, ABHD2, IQGAP1, AIMP1, NET1, ANLN, TWIST1, AKT3, JAK2, FSTL1, CELSR2, ABCC8, NEDD9, ITGA6, MEOX2, BRMS1L, SHROOM2, CEMIP, CCBE1, ITGA4, ASB2, MYOCD, MEF2C, ADGRB1, WNT7A, PKN2, SDCBP, NCK1, FGR, PPP2</p>                                                                                                                                                                                                                                                                                                                                                                                                                                                                                                                                                                                                                                                                                                                                                                                                                                                       |

|            |                                           |                        |                                                                                                                                                                                                                                                                                                                                                                                                                                                                                                                                                                                                                                                                                                                                                                                                                                                                                                                                                                                                                                                                                                                                                                                                                                                                                                                                                                                                                                                                                                                                                                                                                                                                                                                                                                                                         |
|------------|-------------------------------------------|------------------------|---------------------------------------------------------------------------------------------------------------------------------------------------------------------------------------------------------------------------------------------------------------------------------------------------------------------------------------------------------------------------------------------------------------------------------------------------------------------------------------------------------------------------------------------------------------------------------------------------------------------------------------------------------------------------------------------------------------------------------------------------------------------------------------------------------------------------------------------------------------------------------------------------------------------------------------------------------------------------------------------------------------------------------------------------------------------------------------------------------------------------------------------------------------------------------------------------------------------------------------------------------------------------------------------------------------------------------------------------------------------------------------------------------------------------------------------------------------------------------------------------------------------------------------------------------------------------------------------------------------------------------------------------------------------------------------------------------------------------------------------------------------------------------------------------------|
|            |                                           |                        | R3A,CXCL2,EPHA4,NTRK2,NUMB,ADAMTS9,MEGF10,FBXO31,PTK2,CDH5,DIAPH1,LAMB1,SEMA4D,JAM2,WNT5B,PSTPIP2,CCDC88A,TNFSF11,FYN,PPM1F,ARL13B,HDAC2,CRTAM,APELA,FUT8,TET1,CDH2,NTN4,EPHB1,PTPRG,NRP1,PRKCA,ITGA1,MCC,BCR,ELMO1,FBLN1,RRAS2,BMPER,SRGAP3,MITF,EPHB2,MET,CDH13,MAGI2,UNK,FLRT2,LAMA1,ATRNL1,BMP7,ASTN2,DLG5,ZMYND8,KIRREL3,PDGFC,ABL2,SLIT2,CCDC141,ERBB4,ROBO1,PRKCQ,VCAN,FRMD5,NTNG1,LOXL2,FOXB1,CAMK1D,PIK3R3,FER,CCR2,STARD13,EPS8,SEMA4B,HRH1,ROCK2,IL16,DMRT1,WASHC1,APCDD1,IGF1R,DNM1L                                                                                                                                                                                                                                                                                                                                                                                                                                                                                                                                                                                                                                                                                                                                                                                                                                                                                                                                                                                                                                                                                                                                                                                                                                                                                                        |
| GO:0099536 | synaptic signaling                        | 1.8940531707599639e-13 | CNTN4,NSG1,PTPRD,SLC24A2,LRRRC4C,UNC13C,PLCB1,PTPRA,STXBP1,ERC1,LRFN2,CDH8,CHRNA7,RIMS1,GABRB3,RIMS2,MC TP1,SV2C,CACNG2,DLGAP1,TSHZ3,CRKL,SLC4A10,USP14,BTB D9,GRIK3,GABRB1,DGKI,GRIA1,SLC8A3,CHRM3,RAPGEF2,FGF12,GABRA6,PTPRN2,SYN2,GRM7,APP,RPS6KA2,CACNB2,STAU2,GABRG2,SYT1,NTF3,ERC2,SYN3,PRKCZ,SV2B,MAPK1,CADPS2,HRH2,PLG,SYT10,NRG3,HRH4,SORCS3,PAFAH1B1,GRIK4,PPP1R9A,AKAP9,RASGRF2,SYNJ1,GRM1,GABRG1,TMEM108,AMPH,CDH11,USP8,TNR,GRM8,ELAVL4,ABL1,SLC1A1,RIMBP2,RAP1A,GRID2,NRG1,RASGRF1,PRKCE,DGKB,P2RX6,EXT1,RPS6KA3,ATXN3,HTR2C,RIC3,OPRM1,HTR2A,TMOD2,APBA2,KCND2,MYLK2,MBP,PACSIN2,DISC1,RELN,GNAQ,UNC13B,GABRR2,GRIK2,MCTP2,FARP1,GABBR2,KPNA1,ZZEF1,DCC,CHRM5,PRKN,MTMR2,DLGAP2,GRIN2A,ALS2,KCNQ3,SHISA9,SHANK2,PLCB4,GRID1,CO LQ,NMU,RPH3A,GABRG3,IGSF11,HCN1,GRIN2B,CELF4,ROR2,C LSTN2,NRXN1,JAK2,HCRTR1,PRKCB,CACNA1E,SLC6A1,PARK7,MEF2C,ADGRB1,WNT7A,S100B,OR10H2,SDCBP,SNAP29,EPHA4,GABRA5,NTRK2,IL1RAPL1,SHISA6,GRIK1,SCGN,CYFIP1,PCDH8,FYN,CDH2,FBXL20,EPHB1,GRM5,FCHSD2,BCR,NRXN3,EPHB2,CD38,DLG2,CACNG3,SLC1A2,GABRA2,TMEM25,GRM3,EXOC4,P LCL1,SORCS2,NLGN1,NOS1,SLC6A3,ASIC2,DTNA,NTNG1,CCR2,HRH1,RGS8,CADPS                                                                                                                                                                                                                                                                                                                                                                                                                                                                                                                                                                                                                                                                   |
| GO:0048518 | positive regulation of biological process | 2.354684695722861e-13  | NOTCH2,BCAR3,BRINP3,MTOR,NSG1,WWC1,ABCA13,PTPRD,SLC24A2,PVT1,ULK2,FTO,KSR1,MGA,PLCB1,TMPRSS2,SVIL,CLTCL1,ZFPM2,TENM4,DLC1,TNRC6B,DPP10,RIPOR2,PDE4D,RDX,RP1,STXBP1,RALA,BCL2,KCNMA1,PRDM16,ALDH1A2,CHRNA7,ROBO2,RIMS1,EPC2,SPIRE1,TENM3,ZEB1,AKR1C3,RARB,SPRED1,CDC42EP3,RIMS2,ALK,AUTS2,FOXJ2,CARMIL1,PJA2,BABAM2,GLIS3,FANK1,ERBIN,RIN2,ANO6,CACNG2,NEGR1,MLLT3,EGLN3,SUSD4,CNTNAP2,MAP3K9,SPON1,APC,HHLA2,TSHZ3,PLPPR5,DSCAM,TCF4,CRKL,SOX5,SETD2,ERG,TNIF,PTPRJ,KDM4C,N EK4,EGFR,RFX3,ANGPT1,CDK12,BACH1,MACF1,NEK7,NCOR1,RNF220,DOCK2,ZNF407,NEDD4,MAML2,NSMCE2,BCL11A,SOX6,CHSY1,FLI1,CDH4,NTRK3,C5,DKK2,FLT1,RFC3,TASP1,THRAP3,MAPKBP1,DGKI,C12ORF4,EDAR,CRACD,NEO1,CNTN6,SLC39A12,SLC8A3,PRKD1,PAK1,EPHA7,NCOA7,CHRM3,SPEN,RAPGEF2,PELI2,LRP2,ADGRB3,RUNX2,ARSB,FGF12,TAK3,ONECUT1,SLC24A3,UBE2L3,LDB2,CCL28,SMYD3,SEPTIN9,RPTOR,GHR,SSBP3,NEDD4L,ADAM10,HDAC9,ZHX3,ATF7IP,IL1R1,APBB2,APP,RPS6KA2,KDM1B,CACNB2,STAU2,DOCK8,MAPRE2,ZNF600,SEMA5A,SYT1,NTF3,ACER2,CD2AP,AURKA,PARN,ST18,PYGO1,SLC8A1,SSBP2,SRGAP2C,ANKRD31,FIG4,DUX4,PLGRKT,BANK1,MAP4K4,ABCD2,BMPR1B,FMN2,AKAP6,ZNF717,ARNT,RAB8B,PAK3,RFTN1,DIP2B,RANBP2,LARP1,ITPKB,TRPC5,UBE2E2,DNM3,NBN,SCP2,IFT57,PRKCZ,GRB10,TAF15,DIP2A,RAB27B,CNST,HECW1,ABCA5,PHF19,MRTFA,TAF4B,COBL,DUSP22,EBF2,YAP1,NFIA,SHC4,BRINP1,MAPK1,MGAT5,CADPS2,HRH2,KMT2E,PLG,PCGF5,PDGFD,SYT10,NRG3,UBE2O,ANKFY1,GFRA1,NIPBL,SPIDR,GABPA,CORO2B,CHD6,MYLK3,KANSL1,GLP2R,LIMCH1,FMN1,PAFAH1B1,ATF6,TM7SF3,ITGB8,VPS13D,TPM1,NF2,LRRRC38,HIVEP1,CTNNA1,MOB3B,BIRC6,AKAP9,KLF15,RASGRF2,PPARA,MEIS2,SNX30,NFIB,MRTFB,SYNJ1,NR5A2,ADAMTS3,TIAM1,GRM1,FOXJ3,TRERF1,PCDH11Y,PLA2R1,EIF3D,SEMA3C,DAPK1,NAV3,SLC24A4,TMEM108,AGO2,MAGI1,JARID2,GATAD2B,IL34,ANK2,ADGRV1,MELK,BCAS3,RYR2,SYNE2,BBS2,ZNF606,CLPX,RANBP3L,NKG7,SEMA6D,SMARCA4,USP8,PARD3,MAPKAP1,TNRC |

|  |  |  |                                                                                                                                                                                                                                                                                                                                                                                                                                                                                                                                                                                                                                                                                                                                                                                                                                                                                                                                                                                                                                                                                                                                                                                                                                                                                                                                                                                                                                                                                                                                                                                                                                                                                                                                                                                                                                                                                                                                                                                                                                                                                                                                                                                                                                                                                                                                                                                                                                                                                                                                                                                                                                                                                                                                                                                                                                                                                                                                                                                                                                                                                                                                                                                                                                                                                                                                              |
|--|--|--|----------------------------------------------------------------------------------------------------------------------------------------------------------------------------------------------------------------------------------------------------------------------------------------------------------------------------------------------------------------------------------------------------------------------------------------------------------------------------------------------------------------------------------------------------------------------------------------------------------------------------------------------------------------------------------------------------------------------------------------------------------------------------------------------------------------------------------------------------------------------------------------------------------------------------------------------------------------------------------------------------------------------------------------------------------------------------------------------------------------------------------------------------------------------------------------------------------------------------------------------------------------------------------------------------------------------------------------------------------------------------------------------------------------------------------------------------------------------------------------------------------------------------------------------------------------------------------------------------------------------------------------------------------------------------------------------------------------------------------------------------------------------------------------------------------------------------------------------------------------------------------------------------------------------------------------------------------------------------------------------------------------------------------------------------------------------------------------------------------------------------------------------------------------------------------------------------------------------------------------------------------------------------------------------------------------------------------------------------------------------------------------------------------------------------------------------------------------------------------------------------------------------------------------------------------------------------------------------------------------------------------------------------------------------------------------------------------------------------------------------------------------------------------------------------------------------------------------------------------------------------------------------------------------------------------------------------------------------------------------------------------------------------------------------------------------------------------------------------------------------------------------------------------------------------------------------------------------------------------------------------------------------------------------------------------------------------------------------|
|  |  |  | <p>6C,PIAS1,TBC1D5,SPG21,BLK,TNR,DOCK4,MBD5,ATRX,ELAVL4,ABL1,HDAC4,SLC1A1,PRKAA1,MRPS27,DROSHA,APBB1IP,EI PR1,APLF,NFAT5,GUCY1A2,NBAS,SLFN11,RAP1A,GLIS1,MYO10,GPC5,TOX3,CAMK4,CPSF3,FGF10,ZC3HAV1,GRID2,TGM1,LATS2,NRG1,INO80D,CLIP1,ASPM,AP3B1,DENND2B,RASGRF1,ATP11C,ZNF438,ABCB7,ZBTB16,MUSK,SH3GL3,SETDB2,PRKCE,FOXK2,SLCO3A1,MED15,WNK2,ESRRG,FBN2,CD44,EGF,PRRC1,PDE3A,NSMAF,LIMD1,SPRED2,RPS6KA3,ATP8A2,PTPN2,TRIM5,PLXNA2,MCF2L,ATXN3,RFC1,HTR2C,RIC3,CLEC16A,ARHGEF7,ALG10B,ATP8A1,AMBRA1,KDM7A,OPRM1,HTR2A,FANCM,CYP4A11,DAZL,UTF2F2,STAC,SEMA3E,TAF3,RPRD1B,MARK2,GCSAML,EBF3,ALPL,ZNF33B,ABHD17C,PUM1,TMOD2,MSH2,IGF2BP3,EPHA6,ANKRD17,LINGO2,SH3KBP1,SLC2A13,RELL1,EPN2,EVC,KNDC1,SPSB4,CLSPN,NOS2,BICRAL,MNAT1,RBBP8,MDFIC,ADAM12,MYLK2,ANK3,EMILIN2,HMGA2,CCND3,BCL11B,DOCK5,ECE1,CREM,MBP,PLCE1,TGFA,IL17RA,HIP1,FUT9,PRR5L,VAV1,TJP1,NPHP4,EGFLAM,CNTN1,HLA-B,IQSEC1,SNX3,CACNA1I,BRCA2,DISC1,BLM,SEMA3A,ADCY10,BMP2,RC3H2,PSG9,MSR1,VRK1,GNAI1,GFI1B,RANBP9,RESF1,MYRIP,BMP2K,TMEM161A,SEMA3D,ASXL3,POLR3A,RELN,HMGB1,FGF9,NFATC2,SLC23A2,MYOM1,TRAF3,ZNF462,UNC13B,TTC21B,ETS2,DSTYK,UIMC1,DOCK1,PLS1,NIN,ATF1,SLAMF1,SMARCA2,ETS1,GLI3,CGAS,SMARCC1,SMOC2,PCP4,CNKSRR3,VENTX,GRIK2,IDE,PRDM10,RERE,MAP2,GAREM1,LAMC1,NEK10,MOB1B,ATF2,CYLD,BBS4,MAPK8IP1,HIVEP3,PSIP1,CFTR,NELL1,UBASH3A,RGMB,NEU3,KITLG,CAMTA1,SLC30A10,UTF2I,RORB,TADA2A,DAB1,MED27,ZNF208,SELENON,RB1CC1,NMD3,PRKN,MTMR2,TBX20,DPF3,GRIN2A,ARID5B,ZBED9,PRKCH,PKP1,FRMD4A,IL6R,FRMPD4,ALS2,RACGAP1,NLRC5,TDFP1,CNOT6L,TOX,SLC4A4,ZFP90,COPS8,SHANK2,ST8SIA1,USP7,VAV3,ENPP3,PLAGL1,MESD,ITSN2,SOX30,KIR2DL4,RALB,NPAS2,ROCK1,LYN,VCAM1,ZNF780B,EIF2B3,SLC44A2,DTX1,TENM2,OVOL2,NTN1,ZFHX3,RRAGD,BANP,SUPT16H,ARID1B,HOXC13,CRACR2A,RNF152,BAZ1A,CASZ1,INSR,BMF,YTHDF3,DEDD2,NEK6,HECTD1,NMU,DDHD1,PBX3,SUMO2,ZNF292,ARFGEF1,PDE4DIP,SNAI2,ASH1L,IGHV3-74,HOXC4,BID,TRABD2B,RXRG,SP3,ERN2,MBTPS2,TRIM58,TIAL1,ELF2,PLPP4,ZDHHC17,NSD2,FYCO1,SH3GLB1,CARD10,JCAD,TWIST2,CTIF,UTRN,RASGRP1,IGSF11,SNX9,C5NK2A1,BMP5,KCNC1,CSF1,GHRH,BCL2L1,ASB4,GRIN2B,INO80,FANCB,IGHV2-70D,CLNS1A,SMAD5,CELF4,TCERG1,ABCG1,DCUN1D4,SLC40A1,PRAME,TNN,LPGAT1,MICALL2,MED1,CDC14B,PCNT,KDM6A,IL33,GPRC5C,ROR2,CFH,ZNF521,KL,BANK1,CSDE1,LMX1A,IL10,ACTR2,SFPQ,PRAMEF25,RIOK1,CLSTN2,PTH,PRKAA2,CSF2RB,NDC80,LARP6,VSTM2A,MAP6,VASP,PLA2G4A,ETV6,IQGAP1,RPS12,ZBTB7C,TEAD1,MORC2,SREBF2,ANP32B,YBX3,AIMP1,FYB2,NRXN1,PCID2,HIPK1,CD70,CIBAR1,CADM1,CENPE,LMX1B,NET1,ANLN,TWIST1,AKT3,ALKAL2,JAK2,ZBTB38,MADD,HCRTR1,RBM19,PATL1,ZNF287,PRSS2,FH,CREBBP,MELTF,TNKS,GORAB,PCNA,UFL1,NFKBIA,PRKCB,ABCC8,RFC2,ALX4,RTRAF,BRD4,NEDD9,OLFM4,ITGA6,ATP2B1,ASS1,MTCL1,GRIP1,IGHV10R15-9,CTNBL1,SAR1A,HPSE2,CIDEA,ZBTB49,EXOC1,KRT6A,STOX2,AGO1,MEOX2,SLC6A1,GID8,ELL2,STAT1,BRMS1L,NDFIP2,NR2C1,MAP2K6,MTPN,ABI1,CEMIP,PRAMEF2,IMPACT,CCBE1,PAK7,MAPK8,ITGA4,OAZ2,MED12L,POU1F1,UBE2J2,ADCYAP1R1,MTF2,NCAPG2,TM9SF4,MYOCD,CEP120,CYFIP2,ARID3B,MEF2C,ADGRB1,RXRA,WNT7A,RBPMS2,MAP3K5,NDFIP1,MAP3K4,WASF3,S100B,FOXO6,ZNF112,ATP6V1C2,MAGEL2,PKN2,RAD51AP1,PDE2A,RAB38,DBF4B,FBXW8,SDCBP,NSMCE1,WWOX,PASK,NCK1,SCAF8,FGR,CDCA8,PPP2R3A,MLLT10,C2,IFNAR1,RNF8,EPHA4,MECOM,DNMT3L,NTRK2,IL1RAPL1,NUMB,ADAMTS9,WNT2B,OLCN,CREB5,CD101,MEGF10,FBXO31,EXTL3,PRKAB1,PTK2,MARCK4,CDH5,CD5L,ANKRD6,SCGN,NFKBID,ASCL3,MPP7,DIAPH1,LAMB1,CYFIP1,UBE3A,SEMA4D,JAM2,ZBTB20,RUNX1,C9,KIRRE</p> |
|--|--|--|----------------------------------------------------------------------------------------------------------------------------------------------------------------------------------------------------------------------------------------------------------------------------------------------------------------------------------------------------------------------------------------------------------------------------------------------------------------------------------------------------------------------------------------------------------------------------------------------------------------------------------------------------------------------------------------------------------------------------------------------------------------------------------------------------------------------------------------------------------------------------------------------------------------------------------------------------------------------------------------------------------------------------------------------------------------------------------------------------------------------------------------------------------------------------------------------------------------------------------------------------------------------------------------------------------------------------------------------------------------------------------------------------------------------------------------------------------------------------------------------------------------------------------------------------------------------------------------------------------------------------------------------------------------------------------------------------------------------------------------------------------------------------------------------------------------------------------------------------------------------------------------------------------------------------------------------------------------------------------------------------------------------------------------------------------------------------------------------------------------------------------------------------------------------------------------------------------------------------------------------------------------------------------------------------------------------------------------------------------------------------------------------------------------------------------------------------------------------------------------------------------------------------------------------------------------------------------------------------------------------------------------------------------------------------------------------------------------------------------------------------------------------------------------------------------------------------------------------------------------------------------------------------------------------------------------------------------------------------------------------------------------------------------------------------------------------------------------------------------------------------------------------------------------------------------------------------------------------------------------------------------------------------------------------------------------------------------------------|

|            |                          |                        |                                                                                                                                                                                                                                                                                                                                                                                                                                                                                                                                                                                                                                                                                                                                                                                                                                                                                                                                                                                                                                                                                                                                                                                                                                        |
|------------|--------------------------|------------------------|----------------------------------------------------------------------------------------------------------------------------------------------------------------------------------------------------------------------------------------------------------------------------------------------------------------------------------------------------------------------------------------------------------------------------------------------------------------------------------------------------------------------------------------------------------------------------------------------------------------------------------------------------------------------------------------------------------------------------------------------------------------------------------------------------------------------------------------------------------------------------------------------------------------------------------------------------------------------------------------------------------------------------------------------------------------------------------------------------------------------------------------------------------------------------------------------------------------------------------------|
|            |                          |                        | <p>L1,WNT5B,SAXO1,NENF,SH2D1B,POMT2,PTGFR,ZNF845,ASAP1,EDIL3,NOS1AP,PDCL3,CCDC88A,GPR55,CHCHD2,BICD1,TNFSF11,FYN,KDM5A,PPM1F,ADGRL2,RBMS3,HDAC2,SLF1,TBX15,SH2D3C,DOCK3,NCS1,LHFPL2,DOK5,MAPK9,PABPC1,CRTAM,APELA,ROR1,TET1,ARNT2,HECW2,CDH2,ITGA8,RAD9A,GPR137B,EPHB1,GRM5,ADCK1,RPS6KA5,PID1,NRP1,FCHSD2,PRKCA,ATPSCKMT,FAIM,ITGA1,ZNF615,KLF12,RC3H1,NRIP1,CHODL,POR,ZNF850,SUPT3H,BCR,TUT4,PRIM2,FBLN1,STK36,RAG1,RRAS2,BMPER,PRDM15,CUX1,MACROH2A1,MITF,EPHB2,TOGARAM1,CSNK1G1,BCL2L13,CD38,EYA4,MET,SPPL3,CDH17,CDH13,STXBP4,CACNG3,ATG5,MAGI2,PRDM11,VMP1,MLIP,FLT2,MYB,KALRN,SLC1A2,GNAS,LAMA1,MFHAS1,SERPINB7,TIAM2,DHX29,BMP7,DLG5,TNFAIP8,RNF217,BPTF,BTBD10,NUDT21,KMT2C,ADGRF5,PDGFC,PLIN2,ABL2,RFX2,EYA1,SLIT2,CNOT7,ERBB4,IL2ORB,GSAP,SYNDIG1,ROBO1,SAMD4A,PBX1,NPAS3,PRKCQ,ANTXR1,TRDN,MGMT,NLGN1,SHLD2,NOS1,SLC6A3,PRR16,ASIC2,EFNA5,TCF12,ARHGEF11,RAB27A,NSD1,EHMT1,FRMD5,ESR1,LOXL2,CACNA2D1,IGLC3,IQJ-SCHIP1,PRLR,AGO3,HTT,RAD51B,CAMK1D,PIK3R3,HLA-F,FER,EYA2,CCR2,A2M,CHFR,ZNF721,EPS8,SEMA4B,NRF1,IGHV1OR21-1,HRH1,ROCK2,PRDM1,RORA,STMP1,IL16,ATAT1,DMRT1,CDCA5,RAB31,HERPUD1,NCOA6,COL4A3,WASHC1,RGS7,KIF7,BARD1,STK3,ZNF423,RSU1,HNRNPU,RAB3GAP2,CADPS,IGF1R,PRKAG2,GLI2,THRB,AKAP13,MORC3,ATP10A,DNM1L</p> |
| GO:0099537 | trans-synaptic signaling | 3.4521031773406745e-13 | <p>CNTN4,NSG1,PTPRD,SLC24A2,LRR4C,UNC13C,PLCB1,PTPRA,STXBP1,ERC1,LRFN2,CDH8,CHRNA7,RIMS1,GABRB3,RIMS2,MCPTP1,SV2C,CACNG2,DLGAP1,TSHZ3,SLC4A10,USP14,BTBD9,GRIK3,GABRB1,DGKI,GRIA1,SLC8A3,CHRM3,RAPGEF2,FGF12,GABRA6,PTPRN2,SYN2,GRM7,APP,RPS6KA2,CACNB2,STAU2,GABRG2,SYT1,NTF3,ERC2,SYN3,PRKCZ,SV2B,MAPK1,CADPS2,HRH2,PLG,SYT10,NRG3,HRH4,SORCS3,PAFAH1B1,GRIK4,PPP1R9A,AKAP9,RASGRF2,SYNJ1,GRM1,GABRG1,TMEM108,AMPH,CDH11,USP8,TNR,GRM8,ELAVL4,ABL1,SLC1A1,RIMBP2,RAP1A,GRID2,RASGRF1,PRKCE,DGKB,P2RX6,EXT1,RPS6KA3,ATXN3,HTR2C,RIC3,OPRM1,HTR2A,TMOD2,APBA2,KCND2,MYLK2,MBP,PACSIN2,DISC1,RELN,UNC13B,GABRR2,GRIK2,MCTP2,FARP1,GABBR2,ZZEF1,DCC,CHRM5,PRKN,MTMR2,DLGAP2,GRIN2A,ALS2,KCNQ3,SHISA9,SHANK2,PLCB4,GRID1,COLQ,NMU,RPH3A,GABRG3,IGSF11,HCN1,GRIN2B,CELF4,ROR2,CLSTN2,NRXN1,JAK2,HCRT1,PRKCB,CACNA1E,SLC6A1,PARK7,MEF2C,ADGRB1,WNT7A,S100B,OR10H2,SDCBP,SNAP29,EPHA4,GABRA5,NTRK2,IL1RAPL1,SHISA6,GRIK1,SCGN,CYFIP1,PCDH8,FYN,CDH2,FBXL20,EPHB1,GRM5,FCHSD2,BCR,NRXN3,EPHB2,CD38,DLG2,CACNG3,SLC1A2,GABRA2,TMEM25,GRM3,EXOC4,PLCL1,SORCS2,NLGN1,NOS1,SLC6A3,ASIC2,DTNA,NTNG1,CCR2,HRH1,CADPS</p>                                                                                                                            |
| GO:0048870 | cell motility            | 6.736532327464382e-13  | <p>MTOR,SPOCK1,WWC1,LRP12,PLCB1,TAF4,DLC1,RIPOR2,RDX,BCL2,SDCCAG8,SPRED1,ENPEP,SPAG16,USH2A,AUTS2,CARMIL1,MCTP1,ASTN1,RIN2,ANO6,GPC6,APC,CRKL,SETD2,ARHGAP24,PTPRJ,DOCK10,EGFR,RFX3,ANGPT1,MACF1,CTNNA3,DOCK2,SCAI,ARMC2,NTRK3,C5,PHACTR1,FLT1,NEO1,PRKD1,TPTE2,PAK1,RAPGEF2,ARSB,ONECUT1,LDB2,TAF4A,CCL28,DNAH6,ADAM10,HDAC9,IL1R1,APP,MTUS1,DCLK1,DOCK8,MAPRE2,SEMA5A,VCL,NTF3,CD2AP,SLC8A1,PTPRR,SRGAP2C,SRGAP2B,KANK1,MAP4K4,CTNNA2,PAK3,PRKCZ,GRB10,MRTFA,DUSP22,MAPK1,MGAT5,DNAH14,PLG,PDGFD,ITGBL1,NRG3,GFRA1,NIPBL,FAT3,LIMCH1,PAFAH1B1,ITGB8,TPM1,NF2,AVL9,CTNNA1,TIAM1,PTPRK,ENAH,PAK5,SEMA3C,NAV3,AGO2,DNAH11,IL34,BCAS3,SYNE2,BBS2,SLC9C1,SEMA6D,TNR,DST,CXADR,DOCK4,PTPRT,ABL1,HDAC4,SDC2,DNAH5,GPC5,FGF10,PEAK1,NRG1,ASPM,PRKCE,USP33,CD44,PTPRO,EGF,EXT1,LIMD1,PLXNA2,ARHGEF7,ATP8A1,BIN2,SEMA3E,MARK2,GCSAML,SH3KBP1,STK10,EMILIN2,BCL11B,DOCK5,IL17RA,FUT9,PRR5L,VAV1,TJP1,LDLRAD4,NPHP4,IQSEC1,CACNA1I,DISC1,DNER,WPCP,SEMA3A,BMP2,UNC5D,CDC42BPB,RIN3,SEMA3D,RELN,HMGB1,FGF9,NFATC2,DOCK1,SRGAP2,DNAH8,SLAMF1,ETS1,GLI3,SMOC2,RERE,LAMC1,U</p>                                                                                                                                                                      |

|                |                                                 |                                    |                                                                                                                                                                                                                                                                                                                                                                                                                                                                                                                                                                                                                                                                                                                                                                                                                                                                                                                                                                                                                                                                                                                                                                  |
|----------------|-------------------------------------------------|------------------------------------|------------------------------------------------------------------------------------------------------------------------------------------------------------------------------------------------------------------------------------------------------------------------------------------------------------------------------------------------------------------------------------------------------------------------------------------------------------------------------------------------------------------------------------------------------------------------------------------------------------------------------------------------------------------------------------------------------------------------------------------------------------------------------------------------------------------------------------------------------------------------------------------------------------------------------------------------------------------------------------------------------------------------------------------------------------------------------------------------------------------------------------------------------------------|
|                |                                                 |                                    | MODL1,BBS4,LAMC3,COL5A1,ITGA9,KITLG,DCC,DAB1,CDC42B<br>PA,TBX20,DACH1,LYST,ARID5B,IL6R,PTPRB,VAV3,ROCK1,LY<br>N,VCAM1,OVOL2,NTN1,INSR,YTHDF3,SNAI2,ASH1L,SLC22A14<br>,CD9,CARD10,JCAD,TWIST2,IFT81,BMP5,CSF1,PRKG1,LAMA3<br>,VSTM4,TNN,ATRN,IL33,ROR2,FAT1,IL10,TSPAN11,ABHD2,I<br>QGAP1,AIMP1,NET1,ANLN,TWIST1,AKT3,JAK2,FSTL1,CELSR2<br>,ABCC8,NEDD9,ITGA6,MEOX2,BRMS1L,SHROOM2,CEMIP,CCBE1<br>,ITGA4,ASB2,MYOCD,MEF2C,ADGRB1,WNT7A,PKN2,SDCBP,NCK<br>1,FGR,DRC7,PPP2R3A,CXCL2,EPHA4,INTS13,NTRK2,NUMB,AD<br>AMTS9,MEGF10,FBXO31,PTK2,CDH5,DIAPH1,LAMB1,HOATZ,SE<br>MA4D,JAM2,WNT5B,PSTPIP2,TPTE,CCDC88A,SPAG6,TNFSF11,<br>FYN,PPM1F,ARL13B,HDAC2,CRTAM,APELA,FUT8,TET1,CDH2,N<br>TN4,EPHB1,PTPRG,NRP1,PRKCA,ITGA1,MCC,BCR,ELMO1,FBLN<br>1,RRAS2,BMPER,SRGAP3,MITF,EPHB2,MET,CDH13,MAGI2,UNK<br>,FLRT2,LAMA1,ATRN1,BMP7,ASTN2,DLG5,ZMYND8,KIRREL3,<br>DNAH3,PDGFC,DNAH17,ABL2,SLIT2,CCDC141,ERBB4,ROBO1,P<br>RKCQ,VCAN,FRMD5,NTNG1,LOXL2,FOXB1,CAMK1D,PIK3R3,CFA<br>P44,CATSPERE,FER,CCR2,STARD13,EPS8,SPOCK3,SEMA4B,HR<br>H1,ROCK2,IL16,DMRT1,CATSPER2,WASHC1,APCDD1,IGF1R,DN<br>MIL                                                                          |
| GO:00<br>07409 | axonogenes<br>is                                | 1.16262<br>0905658<br>4975e-<br>12 | NOTCH2,CNTN4,LRRC4C,ULK2,STXBP1,BCL2,ROBO2,AUTS2,DS<br>CAM,MACF1,BCL11A,CDH4,NEO1,CNTN6,PAK1,EPHA7,ADAMTSL<br>1,APP,DCLK1,SEMA5A,VCL,BMPR1B,CTNNA2,PAK3,DIP2B,TRP<br>C5,COBL,ALCAM,NCAM1,CHN1,PAFAH1B1,NFIB,PRTG,TIAM1,E<br>NAH,SEMA3C,SEMA6D,CDH11,PAR3,TNR,ABL1,USP33,PTPRO,<br>TRIO,EXT1,ATP8A2,PLXNA2,SEMA3E,MARK2,EPHA6,ATL1,AFG<br>3L2,ANK3,BCL11B,ECE1,MBP,CNTN1,DISC1,SEMA3A,UNC5D,S<br>EMA3D,RELN,UST,B4GALT6,NIN,DRAXIN,GLI3,MAP2,DCC,DAB<br>1,ALS2,NTN1,DPYSL5,ZDHHC17,LAMA3,TNN,LMX1A,MAP6,VAS<br>P,NRXN1,GAP43,ITGA4,ADGRB1,WNT7A,S100B,NECTIN1,EPHA<br>4,NTRK2,NUMB,LHX9,PTK2,FEZ2,CYFIP1,SEMA4D,FYN,CDH2,<br>CNTN5,EPHB1,RPS6KA5,NRP1,CHODL,NRXN3,EPHB2,FLRT2,KA<br>LRN,LAMA1,TIAM2,BMP7,SLIT2,CCDC141,ROBO1,PRKCQ,EFNA<br>5,SLIT3,NTNG1,FOXB1,SEMA4B,FSTL4,IGF1R,GLI2                                                                                                                                                                                                                                                                                                                                                                            |
| GO:00<br>07268 | chemical<br>synaptic<br>transmissi<br>on        | 1.20654<br>4416923<br>5557e-<br>12 | CNTN4,NSG1,PTPRD,SLC24A2,LRRC4C,UNC13C,PLCB1,PTPRA,<br>STXBP1,ERC1,LRFN2,CDH8,CHRNA7,RIMS1,GABRB3,RIMS2,MC<br>TP1,SV2C,CACNG2,DLGAP1,TSHZ3,SLC4A10,USP14,BTBD9,GR<br>IK3,GABRB1,DGKI,GRIA1,SLC8A3,CHRM3,RAPGEF2,FGF12,GA<br>BRA6,PTPRN2,SYN2,GRM7,APP,RPS6KA2,CACNB2,STAU2,GABR<br>G2,SYT1,NTF3,ERC2,SYN3,PRKCZ,SV2B,MAPK1,CADPS2,HRH2<br>,PLG,SYT10,NRG3,HRH4,SORCS3,PAFAH1B1,GRIK4,PPP1R9A,<br>AKAP9,RASGRF2,SYNJ1,GRM1,GABRG1,TMEM108,AMPH,CDH11,<br>USP8,TNR,GRM8,ELAVL4,ABL1,SLC1A1,RIMBP2,RAP1A,GRID2<br>,RASGRF1,PRKCE,DGKB,P2RX6,EXT1,RPS6KA3,ATXN3,HTR2C,<br>RIC3,OPRM1,HTR2A,TMOD2,APBA2,KCND2,MYLK2,MBP,PACSIN<br>2,DISC1,RELN,UNC13B,GABRR2,GRIK2,MCTP2,GABBR2,ZZEF1<br>,DCC,CHRM5,PRKN,MTMR2,DLGAP2,GRIN2A,ALS2,CKNQ3,SHIS<br>A9,SHANK2,PLCB4,GRID1,COLQ,NMU,RPH3A,GABRG3,IGSF11,<br>HCN1,GRIN2B,CELF4,ROR2,CLSTN2,NRXN1,JAK2,HCRT1,PRK<br>CB,CACNA1E,SLC6A1,PARK7,MEF2C,ADGRB1,WNT7A,S100B,OR<br>10H2,SDCBP,SNAP29,EPHA4,GABRA5,NTRK2,SHISA6,GRIK1,S<br>CGN,CYFIP1,PCDH8,FYN,CDH2,FBXL20,EPHB1,GRM5,FCHSD2,<br>BCR,NRXN3,EPHB2,CD38,DLG2,CACNG3,SLC1A2,GABRA2,TMEM<br>25,GRM3,EXOC4,PLCL1,SORCS2,NLGN1,SLC6A3,ASIC2,DTNA,<br>NTNG1,CCR2,HRH1,CADPS |
| GO:00<br>98916 | anterograd<br>e trans-<br>synaptic<br>signaling | 1.20654<br>4416923<br>5557e-<br>12 | CNTN4,NSG1,PTPRD,SLC24A2,LRRC4C,UNC13C,PLCB1,PTPRA,<br>STXBP1,ERC1,LRFN2,CDH8,CHRNA7,RIMS1,GABRB3,RIMS2,MC<br>TP1,SV2C,CACNG2,DLGAP1,TSHZ3,SLC4A10,USP14,BTBD9,GR<br>IK3,GABRB1,DGKI,GRIA1,SLC8A3,CHRM3,RAPGEF2,FGF12,GA<br>BRA6,PTPRN2,SYN2,GRM7,APP,RPS6KA2,CACNB2,STAU2,GABR<br>G2,SYT1,NTF3,ERC2,SYN3,PRKCZ,SV2B,MAPK1,CADPS2,HRH2<br>,PLG,SYT10,NRG3,HRH4,SORCS3,PAFAH1B1,GRIK4,PPP1R9A,<br>AKAP9,RASGRF2,SYNJ1,GRM1,GABRG1,TMEM108,AMPH,CDH11,<br>USP8,TNR,GRM8,ELAVL4,ABL1,SLC1A1,RIMBP2,RAP1A,GRID2<br>,RASGRF1,PRKCE,DGKB,P2RX6,EXT1,RPS6KA3,ATXN3,HTR2C,<br>RIC3,OPRM1,HTR2A,TMOD2,APBA2,KCND2,MYLK2,MBP,PACSIN                                                                                                                                                                                                                                                                                                                                                                                                                                                                                                                                        |

|            |                              |                        |                                                                                                                                                                                                                                                                                                                                                                                                                                                                                                                                                                                                                                                                                                                                                                                                                                                                                                                                                                                                                                                                                                                                                                                                                                                                                                                                                                                                                                                                                                                                                                                                                                                                                                                                                                                                                                                                                                                                                                                                                                                                                                                                                                                                                                                                                                                                                                                                                                                                                                                                                                                                                                                                                                                                                                                                                                                                                                                                                                 |
|------------|------------------------------|------------------------|-----------------------------------------------------------------------------------------------------------------------------------------------------------------------------------------------------------------------------------------------------------------------------------------------------------------------------------------------------------------------------------------------------------------------------------------------------------------------------------------------------------------------------------------------------------------------------------------------------------------------------------------------------------------------------------------------------------------------------------------------------------------------------------------------------------------------------------------------------------------------------------------------------------------------------------------------------------------------------------------------------------------------------------------------------------------------------------------------------------------------------------------------------------------------------------------------------------------------------------------------------------------------------------------------------------------------------------------------------------------------------------------------------------------------------------------------------------------------------------------------------------------------------------------------------------------------------------------------------------------------------------------------------------------------------------------------------------------------------------------------------------------------------------------------------------------------------------------------------------------------------------------------------------------------------------------------------------------------------------------------------------------------------------------------------------------------------------------------------------------------------------------------------------------------------------------------------------------------------------------------------------------------------------------------------------------------------------------------------------------------------------------------------------------------------------------------------------------------------------------------------------------------------------------------------------------------------------------------------------------------------------------------------------------------------------------------------------------------------------------------------------------------------------------------------------------------------------------------------------------------------------------------------------------------------------------------------------------|
|            |                              |                        | 2,DISC1,RELN,UNC13B,GABRR2,GRIK2,MCTP2,GABBR2,ZZEF1,DCC,CHRM5,PRKN,MTMR2,DLGAP2,GRIN2A,ALS2,KCNQ3,SHISA9,SHANK2,PLCB4,GRID1,COLQ,NMU,RPH3A,GABRG3,IGSF11,HCN1,GRIN2B,CELF4,ROR2,CLSTN2,NRXN1,JAK2,HCRT1,PRKCB,CACNA1E,SLC6A1,PARK7,MEF2C,ADGRB1,WNT7A,S100B,OR10H2,SDCBP,SNAP29,EPHA4,GABRA5,NTRK2,SHISA6,GRIK1,SCGN,CYFIP1,PCDH8,FYN,CDH2,FBXL20,EPHB1,GRM5,FCHSD2,BCR,NRXN3,EPHB2,CD38,DLG2,CACNG3,SLC1A2,GABRA2,TMEM25,GRM3,EXOC4,PLCL1,SORCS2,NLGN1,SLC6A3,ASIC2,DTNA,NTNG1,CCR2,HRH1,CADPS                                                                                                                                                                                                                                                                                                                                                                                                                                                                                                                                                                                                                                                                                                                                                                                                                                                                                                                                                                                                                                                                                                                                                                                                                                                                                                                                                                                                                                                                                                                                                                                                                                                                                                                                                                                                                                                                                                                                                                                                                                                                                                                                                                                                                                                                                                                                                                                                                                                                 |
| GO:0036211 | protein modification process | 1.7878077447563017e-12 | BCAR3,MTOR,PTPRD,TMTC1,ULK2,NLK,KSR1,AGBL1,TTC3,DLC1,ZDHHC21,PTPRA,PDE4D,ERC1,BCL2,PRDM16,F13A1,GPHN,CHRNA7,PIK3C3,EPC2,SPRED1,GALNT1,MINAR1,PCMTD1,ALK,AUTS2,PJA2,BABAM2,HLCS,MLLT3,EGLN3,MAP3K9,MYO3B,APC,CRKL,SETD2,ERG,TNIN,PTPRJ,KDM4C,NEK4,EGFR,USP14,ANGPT1,CDK12,PRKACB,NEK7,RNF220,NEDD4,NSMCE2,BCL11A,RPRD1A,PTPN4,B3GALT5,NTRK3,LARGE1,TUSC3,FBXL7,FLT1,SLC8A3,PRKD1,TPT2,PAK1,EPHA7,NCOA7,CHRM3,RAPGEF2,PELI2,TAOK3,UBE2L3,PPP2R2B,PUM3,PTPRN2,SMYD3,HERC2,RPTOR,GHR,WDSUB1,NEDD4L,ADAM10,HDAC9,UBE2G1,APP,RPS6KA2,SAMSN1,KDM1B,KLHL13,PHKB,DCLK1,USP18,NTF3,ACER2,PARP15,AURKA,SLC8A1,PTPRR,MARCHF1,MAP4K4,BMPR1B,ARNT,PAK3,TTL7,DIP2B,RANBP2,ITPKB,TRPC5,UBE2E2,HHAT,NB,N,PRKC,SPO,MAN2A2,DIP2A,ST8SIA5,HEC1,PHF19,TAF4B,SENP6,DUSP22,GALNT14,WDR70,PPM1L,RIPK4,MAPK1,MGAT5,USP25,KMT2E,PCGF5,PDGFD,ZNRF3,XXYL1,NRG3,UBE2O,GFRA1,NIPBL,GALNT16,RNGTT,STK38,PTPN13,MYLK3,KANSL1,LIMCH1,EFEMP1,DCAF1,CCNG2,TLK1,NF2,ZDHHC14,MOB3B,BIRC6,AKAP9,KLF15,PPP6R3,UBE3D,RSRC1,PTPRK,PAK5,ST6GALNAC3,TRERF1,PPP2R5E,PDZRN3,DAPK1,STK32B,ALPK2,JARID2,GATAD2B,CPE,IL34,MELK,WNT9B,HECTD4,DUSP16,USP8,PARD3,MAPKAP1,PIAS1,UBE2R2,BLK,ATRX,NUAK1,PTPRT,ABL1,PTPN12,HDAC4,OXR1,SLC1A1,PRKAA1,TTL5,EIPR1,MAST4,ATE1,RAP1A,HECTD2,CAMK4,BAZ2A,MANBA,FGF10,TGM1,PEAK1,LATS2,NRG1,AP3B1,ZBTB16,MUSK,GALNTL6,ZNF675,SMARCD1,SETDB2,PRKCE,SLC3A1,METAP1D,NXN,WNK2,USP33,CD44,PTPRO,EGF,ALPK3,PRRC1,TRIO,EXT1,LNPEP,SPRED2,RPS6KA3,MARCHF8,MTMR3,PTPN2,TRIM5,ATXN3,ST8SIA6,ALG10B,AMBRA1,STK38L,GALNT10,KDM7A,PRMT8,HTR2A,FANCM,FANCA,PPP2R2C,TAF3,RPRD1B,MARK2,C10ORF90,ABHD17C,HERC1,EPHA6,HIPK3,CDKN2C,GRK3,KNDC1,SPSB4,CLSPN,NOS2,STK10,MNAT1,TMTC2,MYLK2,HMGA2,CCND3,FOLH1,STK32A,LYPLA1,CWC27,PLCE1,TGFA,FUT9,PRR5L,GXYLT2,MSRA,FBXO32,LDLRAD4,EGFLAM,CNTN1,FKBP5,NAA35,BRCA2,GALNT13,BLM,ASB7,NRK,BMP2,RC3H2,MYLK4,TRAK1,CDC42BPB,VRK1,TPGS2,BMP2K,RNF38,RELN,GNAQ,FGF9,SH3BP5,UST,TRAF3,DSTYK,UIMC1,B4GALT6,SNX6,CNKS3,CUL1,DAW1,NEK10,MOB1B,PIGN,ATF2,CYLD,MAPK8IP1,KITLG,ZZEF1,CAMTA1,UBR1,MAP4K3,RCAN1,TADA2A,DAB1,MED27,RB1CC1,MYO3A,UBE2E1,PTPRE,PRKN,MTMR2,SPSB1,CDC42BPA,MAPK10,ZNF541,FBXO3,WSB1,USP43,TRPM6,PRKCH,HUNK,IL6R,ALS2,MKNK1,SNX25,PTPRB,COPS8,ST8SIA1,USP7,MOK,RALB,ROCK1,LYN,SUMO3,DTX1,CHKA,FANCL,RNF152,OTUD7A,INSR,CUL5,NEK6,HECTD1,HDAC11,LYPLAL1,SUMO2,ARFGEF1,SNAI2,ASH1L,SIAH2,PIGK,PGAP4,TRABD2B,ERN2,TRIM58,ZDHHC17,NSD2,PTAR1,CARD10,LTN1,ENPP1,ENTPD5,RASGRP1,SNX9,ANAPC1,CSNK2A1,BMP5,CSF1,PPIL6,EOGT,CTDP1,PRKG1,ASB4,FANCB,CLNS1A,SMAD5,MARCHF11,DCUN1D4,PRAME,KLHL7,ATG4B,CDC14B,KDM6A,GPRC5C,ROR2,PPP2R2A,BANK1,SFPQ,PRKAA2,CSF2RB,RNF182,PHF20L1,IQGAP1,CAMLG,NRXN1,HIPK1,FRY,FICD,CENPE,ELOC,TWIST1,AKT3,ALKAL2,JAK2,MPPE1,MADD,CREBBP,TNKS,SIAH3,UFL1,PRKCB,FBXN2,ST6GAL2,RTRAF,BRD4,NEDD9,NRBP1,MAST2,PCMTD2,EXT2,PDP2,BRMS1L,NDFIP2,MAP2K6,MARCHF6,ABI1,CEMIP,IMPACT,PARK7,MAPK8,EIF3F,PPME1,FBXL17,UBE2J2,MTF2,NCAPG2,ASB2,MYOCD,UBE2QL1,ST8SIA4,MEF2C,ADGRB1,MAP3K5,NDFIP1,MAP3K4,TRIM43B,PRDM13,TRIM43,SUMF1,MAGE |

|            |                               |                       |                                                                                                                                                                                                                                                                                                                                                                                                                                                                                                                                                                                                                                                                                                                                                                                                                                                                                                                                                                                                                                                                                                                                                                                                                                                                                                                                                                                                                                                                                                                                                                                                                                                                                                                                                                                                                                                                                                                                                                                                                                                                                                                                                                                                                                                                                                                                                                                                                                                                                                                                                                                                                                                                                                                                                                    |
|------------|-------------------------------|-----------------------|--------------------------------------------------------------------------------------------------------------------------------------------------------------------------------------------------------------------------------------------------------------------------------------------------------------------------------------------------------------------------------------------------------------------------------------------------------------------------------------------------------------------------------------------------------------------------------------------------------------------------------------------------------------------------------------------------------------------------------------------------------------------------------------------------------------------------------------------------------------------------------------------------------------------------------------------------------------------------------------------------------------------------------------------------------------------------------------------------------------------------------------------------------------------------------------------------------------------------------------------------------------------------------------------------------------------------------------------------------------------------------------------------------------------------------------------------------------------------------------------------------------------------------------------------------------------------------------------------------------------------------------------------------------------------------------------------------------------------------------------------------------------------------------------------------------------------------------------------------------------------------------------------------------------------------------------------------------------------------------------------------------------------------------------------------------------------------------------------------------------------------------------------------------------------------------------------------------------------------------------------------------------------------------------------------------------------------------------------------------------------------------------------------------------------------------------------------------------------------------------------------------------------------------------------------------------------------------------------------------------------------------------------------------------------------------------------------------------------------------------------------------------|
|            |                               |                       | <p>L2, PKN2, DBF4B, FBXW8, SDCBP, NSMCE1, PASK, MLLT1, NCK1, FGR, CDCA8, PPP2R3A, TRIM23, TOP1, RNF8, EPHA4, MECOM, NTRK2, OCLN, FBXO31, EXTL3, TRPM7, PRKAB1, PTK2, MARK4, CDH5, UBE3A, SEMA4D, KIRREL1, AMFR, POMT2, NOS1AP, MTTP, DPY19L2, TPT E, PDCL3, CCDC88A, GALNT18, TNFSF11, FYN, BUB1, KDM5A, DPY19L1, PPM1F, SDE2, UHRF2, HDAC2, SLF1, SH2D3C, DOCK3, GALNT17, MTMR7, ZFYVE28, MAPK9, STT3A, SLC39A8, ROR1, GALNT2, FUT8, TET1, ASB3, HECW2, EPHB1, ZDHHC18, GRM5, SPOPL, RPS6KA5, PTPRG, PID1, NRP1, MIDEAS, PRKCA, ATPSCKMT, RNF215, USP24, ITGA1, RNF138, RC3H1, POR, ZNF738, SUPT3H, BCR, SNRK, SENP8, USP49, FBLN1, STK36, RAG1, BMPER, MACROH2A1, EPHB2, CSNK1G1, RNF11, DPH6, PPIL2, CDK14, MET, SPPL3, CAMK1G, ATG5, USP32, MAGI2, MYB, KALRN, LAMA1, MFHAS1, TRIM9, BMP7, RNF217, KMT2C, PDGFC, ABL2, EYA1, TTLL11, SLIT2, PARP8, CNOT7, ESCO1, ERBB4, ROBO1, PRKCQ, NOS1, EFNA5, NSD1, EHMT1, USP31, KDM4B, LOXL2, PRLR, PIGB, HTT, ZDHHC11B, CAMK1D, PIK3R3, MACROD2, FER, EYA2, CHFR, PCMT1, OARD1, SPOCK3, ROCK2, PRDM1, ATAT1, PPP1CB, PDK1, PTPRQ, HERPUD1, NCOA6, TRIM2, WASHC1, BARD1, STK3, DEPTOR, RAB3GAP2, TULP4, IGF1R, PRKAG2, AKAP13, MO RC3</p>                                                                                                                                                                                                                                                                                                                                                                                                                                                                                                                                                                                                                                                                                                                                                                                                                                                                                                                                                                                                                                                                                                                                                                                                                                                                                                                                                                                                                                                                                                                                                                               |
| GO:0051234 | establishment of localization | 3.146155296810111e-12 | <p>UNC80, CACNA2D3, NSG1, EXOC1L, WWC1, SLC17A1, ABCA13, IMMP2L, LRP12, SLC24A2, TRAPPC9, KCNH5, MICU2, SLC25A21, LONP2, UNC13C, MX2, TMRSS2, CLTCL1, SLC37A1, PIEZO2, MICAL3, SNAP25-AS1, DPP10, ZDHHC21, ITPR2, RIPOR2, PDE4D, RDX, STXBP1, ERC1, RALA, SLC44A5, EPS15L1, BCL2, MYO5A, KCNMA1, SYT16, COG5, CHRNA7, RIMS1, PIK3C3, SPIRE1, GABRB3, EXOC6B, SPAG16, MYO1E, TRAPPC8, USH2A, RIMS2, CARMIL1, MCTP1, SV2C, ERBIN, FCHO2, RIN2, ANO6, CACNG2, MAP4, MYO5C, ILDR2, SETD2, TANGO6, SLC4A10, PTPRJ, OCA2, EGFR, RFX3, DENND1A, ANGPT1, MACF1, DOCK2, NEDD4, GNPTAB, BTBD9, CECR2, GRIK3, ATP2B2, TUSC3, ZFAND6, DNAJC13, RABEP1, GABRB1, DGKI, C12ORF4, GRIA1, TTC39B, NUP214, SLC39A12, SLC8A3, TOM1L2, PRKD1, PAK1, CHRM3, GRAMD1B, LRP2, ARSB, FGF12, GABRA6, LDLRAD3, TMEM38B, AGK, RANBP17, SLC24A3, SLC44A1, UBE2L3, TAFA4, PTPRN2, SYN2, SMYD3, HERC2, TMEM241, GRM7, GHR, KIF4A, THADA, NEDD4L, TRPM1, ADAM10, SLC39A11, APP, SLC7A2, ABCB5, CACNA1C, CACNB2, DCLK1, STAU2, GABRG2, TMC1, SYT1, ARHGAP44, NTF3, NDUFAF2, CD2AP, SLC8A1, ABCG8, KCNE4, ABCD2, FMN2, PCSK6, AKAP6, HOMER2, RAB8B, RFTN1, KCNK10, RANBP2, TRPC5, RAP1GDS1, CLIC6, ERC2, DNM3, CUBN, SCP2, SYN3, IFT57, PRKCZ, GRB10, RYR3, MCPH1, RAB27B, CNST, HECW1, ABCA5, SV2B, SEM1, VPS35L, MAPK1, CADPS2, KCNJ1, HRH2, ABCD3, RABGAP1L, SGTB, TRPC7, SLC45A4, COPB1, SYT10, UBE20, ANKFY1, NIPBL, SLC16A1, SPIDR, NIPAL2, IPO11, MICU1, CORO2B, PAFAH1B1, TM7SF3, STON2, VPS13D, TLK1, LRR38, GRIK4, RBFOX1, ZDHHC14, CORIN, AKAP9, KLF15, RASGRF2, PPARA, SNX30, KCNS3, SYNJ1, GRM1, RSRC1, GABRG1, PARD3B, PLA2R1, DAPK1, SLC24A4, SEC14L1, VPS13C, TMEM108, DNAH11, SCN2A, RAB22A, SORCS1, DNAJC15, AMPH, CPE, DYSF, ANK2, ADGRV1, BCAS3, RYR2, SYNE2, BBS2, SLC9C1, RANBP3L, NKAIN3, NKG7, DUSP16, FABP7, PARD3, SLC36A1, TBC1D5, BLK, DST, CXADR, ABLL1, SLC1A1, PRKAA1, SLC12A8, KCNH1, PRELID2, ANO4, CCDC91, EIPR1, DNAH5, NBAS, RAP1A, NKAIN2, MYO10, SLC46A3, PLEKHA8, FGF10, GRID2, NRG1, GSG1L, AP3B1, RASGRF1, ATP11C, ABCB7, SH3GL3, ABCC12, PRKCE, SLCO3A1, SLMAP, WNK2, USP33, DENND4C, CEP83, EGF, ABCC9, P2RX6, EXT1, STXBP6, PEX14, IFT43, ATP8A2, SCG5, HTR2C, CLEC16A, SLC2A3, ARHGEF7, ALG10B, ATP8A1, RFTN2, ZFYVE9, OPRM1, ABCC4, HTR2A, BIN2, CYBRD1, CYP4A11, CNM4, STAC, CNIH3, IGF2BP3, APBA2, MAIP1, SH3KBP1, SLC2A13, EPN2, KCND2, TNPO3, ABCA10, GRK3, CD163, NOS2, AFG3L2, MDFIC, MYLK2, ANK3, NIPA2, TMC7, COG2, VPS41, LYPLA1, TRAPPC11, TMEM163, HHIPL1, ANKFN1, HIP1, PRR5L, VPS37A, ATP6V1E1, VAV1, RUFY2, PACSIN2, CNTN1, SNX3, CACNA1I, BHLHE40-AS1, KCNJ15, BRCA2, DNER, WDCP, SLC10A7, LRP1B, ADCY10, STX12, BMP2, ATP9A, TRAK1, EVI5, SCN11A, MSR1, TBC1D4, MYRIP, TTR, RIN3, BMP2K, SLC15A5, NETO2, RELN, HMGB1, AP4E1, FGF9,</p> |



|            |                  |                        |                                                                                                                                                                                                                                                                                                                                                                                                                                                                                                                                                                                                                                                                                                                                                                                                                                                                                                                                                                                                                                                                                                                                                                                                                                                                                                                                                                                                                                                                                                                                                                                                                                                                                                                                                                                                                                                                                                                                                                                                                                                                                                                                                                                                                                                                                                                                                                                                                                                                                                                                                                                                                                                                                                                                                                                                                                                                                                                                                                     |
|------------|------------------|------------------------|---------------------------------------------------------------------------------------------------------------------------------------------------------------------------------------------------------------------------------------------------------------------------------------------------------------------------------------------------------------------------------------------------------------------------------------------------------------------------------------------------------------------------------------------------------------------------------------------------------------------------------------------------------------------------------------------------------------------------------------------------------------------------------------------------------------------------------------------------------------------------------------------------------------------------------------------------------------------------------------------------------------------------------------------------------------------------------------------------------------------------------------------------------------------------------------------------------------------------------------------------------------------------------------------------------------------------------------------------------------------------------------------------------------------------------------------------------------------------------------------------------------------------------------------------------------------------------------------------------------------------------------------------------------------------------------------------------------------------------------------------------------------------------------------------------------------------------------------------------------------------------------------------------------------------------------------------------------------------------------------------------------------------------------------------------------------------------------------------------------------------------------------------------------------------------------------------------------------------------------------------------------------------------------------------------------------------------------------------------------------------------------------------------------------------------------------------------------------------------------------------------------------------------------------------------------------------------------------------------------------------------------------------------------------------------------------------------------------------------------------------------------------------------------------------------------------------------------------------------------------------------------------------------------------------------------------------------------------|
|            |                  |                        | <p>SLC23A2,MYOM1,PRG4,UNC13B,TTC21B,DOCK1,PLS1,SNX8,SEC23B,SLC39A6,CCDC186,SLAMF1,KCNH8,GLI3,SNX6,SLC37A2,SLC9A4,GABRR2,CNKSR3,GRIK2,MCTP2,MAP2,DAW1,PEX6,NEK10,RRBP1,ATF2,BBS4,LRR8B,MAPK8IP1,ANTXRL,CFTR,KPNA1,CSE1L,DOP1B,TBC1D13,NEU3,PHAF1,ATP10B,CHRM5,SLC30A10,SELENON,NMD3,REPS1,PRKN,MTMR2,LYST,HEPHL1,GRIN2A,JPH1,ATXN1,TRPM6,CDH23,SLC12A1,FRMD4A,TG,ALS2,RA CGAP1,ACO1,SNX25,FBLN5,OSCP1,KCNQ3,SHISA9,SLC4A4,SCN10A,USP7,VAV3,MON2,KCND3,MESD,ITSN2,SOX30,SYBU,RALB,YIPF6,KCNN3,MYO1D,SEC24D,ROCK1,LYN,SEL1L,SLC44A2,SLC15A2,NTN1,CHKA,SLC13A5,CRACR2A,INSR,NPIPA1,CUL5,DMBT1,GRID1,COLQ,SLC52A1,ARFGEF1,IGHV3-74,BID,OSBPL10,RPH3A,TANC2,COX5A,ABCA4,UFD1,GABRG3,TRIM58,TOM1,PLPP4,ZDHHC17,NSD2,FYCO1,ESYT2,SH3GLB1,SLC22A14,CD9,TMED3,XKR5,IFT81,ENPP1,UTRN,RASGRP1,SNX9,KCNC1,GHRH,NUP37,BCL2L1,HCN1,GRIN2B,IGHV2-70D,CLNS1A,SYNJ2,ABCG1,KCNK5,SLC40A1,CABYR,CIDECA,PSAP,CFHR4,MICALL2,MED1,IPCEF1,ATG4B,PCNT,SLC5A12,ACTR2,SFPQ,PTH,NDC80,MAP6,PLA2G4A,SCFD2,KIFC1,SLC25A52,CAMLG,COX7A2L,SREBF2,ANP32B,AIMP1,LASP1,NRXN1,PCID2,ENTHD1,SNAP91,CENPE,PEG10,TWIST1,JAK2,SLC1A7,MPPE1,CELSR2,MELTF,TNKS,ARL11,SLAH3,TRPV5,NFKBIA,PRKCB,GOT2,ABCC8,MIPEP,CACNA1E,ANP32A,RTRAF,NRBP1,ATP2B1,SLC14A2,CLCA4,MTCL1,GRIP1,IGHV10R15-9,SAR1A,CNIH1,TRAPPC3,XKR6,OTOP1,BBS9,EXT2,EXOC1,SLC6A1,NDFIP2,MAP2K6,SHROOM2,RN7SL483P,SLC6A11,KCNJ18,CEMIP,CBLIF,PARK7,MAPK8,ITGA4,OAZ2,BCAP29,UBE2J2,ADCYAP1R1,PLA2G12B,NDC1,TM9SF4,RAPGEF4,CEP120,ATP13A3,ARL4C,EFHB,MEF2C,STOML1,ADGRB1,RXRA,WNT7A,NDFIP1,SLC5A9,ATP6V1C2,CHAMP1,MAGEL2,SLC10A6,RAB38,SDCBP,NECTIN1,JPT2,PASK,FLVCR1,FGR,CDCA8,TRIM23,ATP6V1B2,SNAP29,C2,GABRA5,NTRK2,IL1RAPL1,NUMB,ADAMTS9,RN7SL767P,COLEC12,PLEKHA3,OCLN,STON1-GTF2A1L,SHISA6,MEGF10,TRPM7,KTN1,GRIK1,IRESB2,MFSD9,MVB12B,PTK2,CD5L,APOL2,AP4S1,ARHGAP12,DIAPH1,SCAMP1,CYFIP1,UBE3A,APOL1,PITPNC1,AP2B1,SCARA5,SLC26A2,HEATR5A,ICA1,PLCZ1,NOS1AP,MTTP,SLC9A5,SRP9,CCDC88A,NSUN2,SLC27A6,SPAG6,SLC5A1,BICD1,ANO10,TNFSF11,FYN,PPM1F,XPO7,SCN8A,TMEM63C,NCS1,ATP5PF,ATP9B,NALCN,EHBP1,APELA,TRPM3,SLC39A8,SLC16A9,HECW2,CDH2,ITGA8,FBXL20,ZDHHC18,GRM5,TBC1D1,PID1,NRP1,FCHSD2,IFT46,ATPSCKMT,RNF215,CROT,ABCA6,SLC14A1,MCC,BCR,NRXN3,ELMO1,KIF16B,ARFGAP3,STK36,NSG2,MB,KCNJ6,RABL2A,CUX1,DPP6,SLC35F1,MACROH2A1,EPHB2,TSPAN13,CSNK1G1,CD38,MYO5B,RGPD4,MET,DLG2,CDH17,ATP6V0D2,PPFIA2,CDH13,STXBP4,CACNG3,ATG5,MAGI2,SLC35F4,VMP1,KALRN,SLC1A2,GNAS,NUP43,TMPRSS15,ASTN2,GAPVD1,GABRA2,TRAPPC10,DDX6,WDR41,PLIN2,ABL2,VPS13B,TRAPPC6B,TMPRSS3,EXOC4,KCNIP4,ERBB4,FAM3B,SYNDIG1,NUF2,RGPD2,SAMM50,ANTXR1,SORCS2,TRDN,NLGN1,NOS1,SLC6A3,ASIC2,EFNA5,RAB27A,KIF13A,AP5M1,DNAH9,SLC25A48,KCNQ5,LOXL2,CACNA2D1,IGLC3,IRAG2,PRLR,HTT,ZDHHC11B,FOXO1,CAMK1D,SLC25A18,HLA-F,FER,EYA2,KATNIP,CCR2,PITPNM3,OSBPL5,OSBPL6,IGHV10R21-1,ANO2,GRIA4,AGAP1,IL16,TERB2,CDCA5,CATSPER2,RAB31,HSPG2,HERPUD1,WASHC1,RGS7,HOOK3,CLDN10,BARD1,CLCN5,STK3,SLC13A4,PNPLA8,HNRNPU,VTI1A,RAB3GAP2,CADPS,IGF1R,KCNAB1,PRKAG2,TANGO2,AKAP13,ATP10A,DNM1L</p> |
| GO:0061564 | axon development | 3.1775160542857953e-12 | <p>NOTCH2,CNTN4,LRR4C,ULK2,STXBP1,BCL2,ROBO2,AUTS2,DS-CAM,MACF1,BCL11A,CDH4,NEO1,CNTN6,PAK1,EPHA7,ADAMTSL1,GRM7,APP,DCLK1,SEMA5A,VCL,BMP1B,CTNNA2,PAK3,DIP2B,TRPC5,COBL,ALCAM,NCAM1,CHN1,PAFAH1B1,CTNNA1,NFIB,PRTG,TIAM1,ENAH,SEMA3C,SEMA6D,CDH11,PARD3,TNR,ABL1,CRTAC1,USP33,PTPRO,TRIO,EXT1,ATP8A2,PLXNA2,KREMEN1,SEMA3E,MARK2,EPHA6,ATL1,AFG3L2,ANK3,BCL11B,ECE1,MBP,CNTN1,DISC1,SEMA3A,UNC5D,NCAM2,SEMA3D,RELN,UST,B4G</p>                                                                                                                                                                                                                                                                                                                                                                                                                                                                                                                                                                                                                                                                                                                                                                                                                                                                                                                                                                                                                                                                                                                                                                                                                                                                                                                                                                                                                                                                                                                                                                                                                                                                                                                                                                                                                                                                                                                                                                                                                                                                                                                                                                                                                                                                                                                                                                                                                                                                                                                                      |

|            |                                                  |                       |                                                                                                                                                                                                                                                                                                                                                                                                                                                                                                                                                                                                                                                                                                                                                                                                                                                                                                                                                                                                                                                                                                                                                                                                                                                                                                                                                                                                                                                                                                                                                                                                                                                                                                                                                                                                                                                                                                                                                                                                                                                                                                               |
|------------|--------------------------------------------------|-----------------------|---------------------------------------------------------------------------------------------------------------------------------------------------------------------------------------------------------------------------------------------------------------------------------------------------------------------------------------------------------------------------------------------------------------------------------------------------------------------------------------------------------------------------------------------------------------------------------------------------------------------------------------------------------------------------------------------------------------------------------------------------------------------------------------------------------------------------------------------------------------------------------------------------------------------------------------------------------------------------------------------------------------------------------------------------------------------------------------------------------------------------------------------------------------------------------------------------------------------------------------------------------------------------------------------------------------------------------------------------------------------------------------------------------------------------------------------------------------------------------------------------------------------------------------------------------------------------------------------------------------------------------------------------------------------------------------------------------------------------------------------------------------------------------------------------------------------------------------------------------------------------------------------------------------------------------------------------------------------------------------------------------------------------------------------------------------------------------------------------------------|
|            |                                                  |                       | <p> <i>ALT6, TSPAN2, NIN, DRAXIN, GLI3, MAP2, DCC, DAB1, ALS2, NTN1, DPYSL5, NREP, ZDHHC17, LAMA3, TNN, LMX1A, MAP6, VASP, NRXN1, JAK2, GAP43, ITGA4, ADGRB1, WNT7A, S100B, NECTIN1, EPHA4, NTRK2, NUMB, LHX9, PTK2, FEZ2, CYFIP1, SEMA4D, FYN, CDH2, CNTN5, EPHB1, RPS6KA5, NRP1, CHODL, NRXN3, EPHB2, FLRT2, KALRN, LAMA1, TIAM2, BMP7, SLIT2, CCDC141, ROBO1, PRKCQ, EFNA5, SLIT3, NTNG1, FOXB1, SEMA4B, FSTL4, IGF1R, GLI2</i> </p>                                                                                                                                                                                                                                                                                                                                                                                                                                                                                                                                                                                                                                                                                                                                                                                                                                                                                                                                                                                                                                                                                                                                                                                                                                                                                                                                                                                                                                                                                                                                                                                                                                                                       |
| GO:0022603 | regulation of anatomical structure morphogenesis | 5.912535988550438e-12 | <p> <i>PTPRD, LRRC4C, MYO9A, ULK2, TAF4A, TENM4, DLC1, RDX, RALA, CHRNA7, ROBO2, RIMS1, SPIRE1, FGD4, SPRED1, MINAR1, CDC42EP3, RIMS2, FOXJ2, CARMIL1, PARVB, MLLT3, GPC6, ZMYM4, DSCAM, CRKL, TNK1, MACF1, NEDD4, BCL11A, CDH4, C5, FLT1, SLC39A12, PRKD1, PAK1, EPHA7, RAPGEF2, ADGRB3, RUNX2, PRICKLE2, EPB41L3, COL4A2, NEDD4L, STAU2, SEMA5A, SYT1, ARHGAP44, AURKA, CFDP1, KANK1, PAK3, DIP2B, TRPC5, DNM3, HECW1, ZNRF3, CHN1, PAFAH1B1, ITGB8, TPM1, TIAM1, SEMA3C, AGO2, BRWD1, WNT9B, SEMA6D, TNFR, ABL1, SDC2, GAS2, MYO10, FGF10, CD44, EGF, LIMD1, PLXNA2, ARHGEF7, SEMA3E, MARK2, SH3KBP1, EPN2, KND1, ADAM12, EMILIN2, HMGA2, DOCK5, MBP, TJP1, PDLIM5, DISC1, WDRCP, SEMA3A, BMP2, SEMA3D, RELN, UST, SLC23A2, DOCK1, NIN, DRAXIN, ETS1, SMOC2, MAP2, ATF2, DCC, GTF2I, DAB1, PRKN, NGEF, ITSN2, ROCK1, NTN1, DPYSL5, SHROOM3, DDHD1, SNAI2, TANC2, JCAD, CSF1, CNMD, TNN, AJAP1, IL10, ACTR2, MAP6, PALMD, HIPK1, TWIST1, AKT3, CELSR2, MELTF, PRKCB, ABCC8, NEDD9, OLFM4, GRIPI1, AGO1, STAT1, CCBE1, MEF2C, ADGRB1, WNT7A, WASF3, FBXW8, FGR, DNMBP, EPHA4, NTRK2, IL1RAPL1, ADAMTS9, WNT2B, FBXO31, PTK2, CDH5, ANKRD6, DIAPH1, CYFIP1, UBE3A, SEMA4D, RUNX1, WNT5B, PDCL3, FYN, MYL12B, APELA, ROR1, HECW2, CDH2, NTN4, ADCY1, PID1, NRP1, PRKCA, RC3H1, CHODL, BCR, FBLN1, BMPER, CUX1, EPHB2, PPFIA2, MAGI2, FAM171A1, KALRN, TIAM2, BMP7, SLIT2, ROBO1, NLGN1, EFNA5, ESR1, NTNG1, CCR2, EPS8, SEMA4B, ROCK2, HSPG2, COL4A3, FSTL4, APCDD1, ATP10A, DNM1L</i> </p>                                                                                                                                                                                                                                                                                                                                                                                                                                                                                                                                                                                                                    |
| GO:0006810 | transport                                        | 9.173857206111255e-12 | <p> <i>UNC80, CACNA2D3, NSG1, EXOC1L, WWC1, SLC17A1, ABCA13, IMPG2L, LRP12, SLC24A2, TRAPPC9, KCNH5, MICU2, SLC25A21, LONP2, UNC13C, MX2, TMPPRS2, CLTCL1, SLC37A1, PIEZO2, MICAL3, SNAP25, AS1, DPP10, ZDHHC21, ITPR2, PDE4D, RDX, STXBP1, ERC1, RALA, SLC44A5, EPS15L1, BCL2, MYO5A, KCNMA1, SYT16, COG5, CHRNA7, RIMS1, PIK3C3, SPIRE1, GABRB3, EXOC6B, SPAG16, MYO1E, TRAPPC8, RIMS2, CARMIL1, MCTP1, SV2C, ERBIN, FCHO2, RIN2, ANO6, CACNG2, MYO5C, ILDR2, SETD2, TANGO6, SLC4A10, PTPRJ, OCA2, EGFR, RFX3, DENND1A, ANGPT1, MACF1, DOCK2, NEDD4, GNPTAB, BTBD9, CECR2, GRIK3, ATP2B2, TUSC3, ZFAND6, DNAJC13, RABEP1, GABRB1, DGKI, C12ORF4, GRIA1, TTC39B, NUP214, SLC39A12, SLC8A3, TOM1L2, PRKD1, PAK1, CHRM3, GRAMD1B, LRP2, ARSB, FGFI2, GABRA6, LDLRAD3, TMEM38B, AGK, RANBP17, SLC24A3, SLC44A1, UBE2L3, TAF4A, PTPRN2, SYN2, HERC2, TMEM241, GRM7, GHR, KIF4A, THADA, NEDD4L, TRPM1, ADAM10, SLC39A11, APP, SLC7A2, ABCB5, CACNA1C, CACNB2, DCLK1, STAU2, GABRG2, TMCI1, SYT1, ARHGAP44, NTF3, NDUFAF2, CD2AP, SLC8A1, ABCG8, KCNE4, ABCD2, FMN2, PCSK6, AKAP6, HOMER2, RAB8B, RFTN1, KCNK10, RANBP2, TRPC5, RAP1GDS1, CLIC6, ERC2, DNM3, CUBN, SCP2, SYN3, IFT57, PRKCZ, GRB10, RYR3, RAB27B, CNST, HECW1, ABCA5, SV2B, SEM1, VPS35L, MAPK1, CADPS2, KCNJ1, HRH2, ABCD3, RABGAP1L, SGTB, TRPC7, SLC45A4, COPB1, SYT10, UBE2O, ANKFY1, SLC16A1, NIPAL2, IPO11, MICU1, PAFAH1B1, TM7SF3, STON2, VPS13D, TLK1, LRRC38, GRIK4, RBFOX1, ZDHHC14, CORIN, AKAP9, KLF15, RASGRF2, PPARA, SNX30, KCNS3, SYNJ1, GRM1, RSRC1, GABRG1, PLA2R1, DAPK1, SLC24A4, SEC14L1, VPS13C, TMEM108, DNAH11, SCN2A, RAB22A, SORCS1, DNAJC15, AMPH, CPE, DYSLF, ANK2, BCAS3, RYR2, SYNE2, BBS2, SLC9C1, RANBP3L, NKAIN3, NKG7, DUSP16, FABP7, PARD3, SLC36A1, TBC1D5, BLK, DST, CXADR, ABL1, SLC1A1, PRKAA1, SLC12A8, KCNH1, PRELID2, ANO4, CCDC91, EIPR1, DNAH5, NBAS, RAP1A, NKAIN2, MYO10, SLC46A3, PLEKHA8, FGF10, GRID2, NRG1, GSG1L, AP3B1, RASGRF1, ATP11C, ABCB7, SH3GL3, ABCC12, PRKCE, SLCO3A1, SLMAP, WNK2, USP33, DENND4C, CEP83, EGF, ABCC9, P2RX6, EXT1, STXBP6, PEX14, IFT43, ATP8A2, SCG5, HTR</i> </p> |

|  |  |  |                                                                                                                                                                                                                                                                                                                                                                                                                                                                                                                                                                                                                                                                                                                                                                                                                                                                                                                                                                                                                                                                                                                                                                                                                                                                                                                                                                                                                                                                                                                                                                                                                                                                                                                                                                                                                                                                                                                                                                                                                                                                                                                                                                                                                                                                                                                                                                                                                                                                                                                                                                                                                                                                                                                                                                                                                                                                                                                                                                                                                                                                                                                                                                                                                                                                                                   |
|--|--|--|---------------------------------------------------------------------------------------------------------------------------------------------------------------------------------------------------------------------------------------------------------------------------------------------------------------------------------------------------------------------------------------------------------------------------------------------------------------------------------------------------------------------------------------------------------------------------------------------------------------------------------------------------------------------------------------------------------------------------------------------------------------------------------------------------------------------------------------------------------------------------------------------------------------------------------------------------------------------------------------------------------------------------------------------------------------------------------------------------------------------------------------------------------------------------------------------------------------------------------------------------------------------------------------------------------------------------------------------------------------------------------------------------------------------------------------------------------------------------------------------------------------------------------------------------------------------------------------------------------------------------------------------------------------------------------------------------------------------------------------------------------------------------------------------------------------------------------------------------------------------------------------------------------------------------------------------------------------------------------------------------------------------------------------------------------------------------------------------------------------------------------------------------------------------------------------------------------------------------------------------------------------------------------------------------------------------------------------------------------------------------------------------------------------------------------------------------------------------------------------------------------------------------------------------------------------------------------------------------------------------------------------------------------------------------------------------------------------------------------------------------------------------------------------------------------------------------------------------------------------------------------------------------------------------------------------------------------------------------------------------------------------------------------------------------------------------------------------------------------------------------------------------------------------------------------------------------------------------------------------------------------------------------------------------------|
|  |  |  | <p>2C,CLEC16A,SLC2A3,ARHGEF7,ALG10B,ATP8A1,RFTN2,ZFYVE9,OPRM1,ABCC4,HTR2A,BIN2,CYBRD1,CYP4A11,CNNM4,STAC,CNIH3,IGF2BP3,APBA2,MAIP1,SH3KBP1,SLC2A13,EPN2,KCND2,TNPO3,ABCA10,GRK3,CD163,NOS2,AFG3L2,MDFIC,MYLK2,ANK3,NIPA2,TMC7,COG2,VPS41,LYPLA1,TRAPPC11,TMEM163,HHIPL1,HIP1,PRR5L,VPS37A,ATP6V1E1,VAV1,RUFY2,PACSIN2,CNTN1,SNX3,CACNA1I,BHLHE40-AS1,KCNJ15,DNER,WDPCP,SLC10A7,LRP1B,ADCY10,STX12,BMP2,ATP9A,TRAK1,EVI5,SCN11A,MSR1,TBC1D4,MYRIP,TTR,RIN3,BMP2K,SLC15A5,NETO2,RELN,HMGB1,AP4E1,FGF9,SLC23A2,MYOM1,PRG4,UNC13B,TTC21B,DOCK1,PLS1,SNX8,SEC23B,SLC39A6,CCDC186,SLAMF1,KCNH8,GLI3,SNX6,SLC37A2,SLC9A4,GABRR2,CNKSR3,GRIK2,MCTP2,MAP2,DAW1,PEX6,NEK10,RRBP1,ATF2,BBS4,LRRK8B,MAPK8IP1,ANTXR1,CFTR,KPNA1,CSE1L,DOP1B,TBC1D13,NEU3,PHAF1,ATP10B,CHRM5,SLC30A10,SELENON,NMD3,REPS1,PRKN,MTMR2,LYST,HEPHL1,GRIN2A,JPH1,ATXN1,TRPM6,CDH23,SLC12A1,FRMD4A,TG,ALS2,RACGAP1,ACO1,SNX25,FBLN5,OSCP1,KCNQ3,SHISA9,SLC4A4,SCN10A,U SP7,VAV3,MON2,KCND3,MESD,ITSN2,SOX30,SYBU,RALB,YIPF6,KCNN3,MYO1D,SEC24D,ROCK1,LYN,SEL1L,SLC44A2,SLC15A2,NTN1,CHKA,SLC13A5,CRACR2A,INSR,NPIPA1,CUL5,DMBT1,GRID1,SLC52A1,ARFGEF1,IGHV3-74,BID,OSBPL10,RPH3A,TANC2,COX5A,ABCA4,UFD1,GABRG3,TRIM58,TOM1,PLPP4,ZDHHC17,FYCO1,ESYT2,SH3GLB1,SLC22A14,CD9,TMED3,XKR5,IFT81,ENPP1,UTRN,RASGRP1,SNX9,KCNC1,GHRH,NUP37,BCL2L1,HCN1,GRIN2B,IGHV2-70D,CLNS1A,SYNJ2,ABCG1,KCNK5,SLC40A1,CABYR,CIDEC,PSAP,CFHR4,MICALL2,MED1,IPCEF1,ATG4B,PCNT,SLC5A12,ACTR2,SFPQ,PTH,MAP6,PLA2G4A,SCFD2,SLC25A52,CAMLG,COX7A2L,SREBF2,ANP32B,AIMP1,LASP1,NRXN1,PCID2,ENTHD1,SNAP91,PEG10,TWIST1,JAK2,SLC1A7,MPPE1,CELSR2,MELTF,TNKS,ARL11,SIAH3,TRPV5,NFKBIA,PRKCB,GOT2,ABCC8,MIPEP,CACNA1E,ANP32A,RTRAF,NRBP1,ATP2B1,SLC14A2,CLCA4,MTCL1,GRIPI,IGHV10R15-9,SAR1A,CNIH1,TRAPPC3,XKR6,OTOP1,BBS9,EXT2,EXOC1,SLC6A1,NDFIP2,MAP2K6,SHROOM2,RN7SL483P,SLC6A11,KCNJ18,CEMIP,CBLIF,PARK7,MAPK8,ITGA4,OAZ2,BCAP29,UBE2J2,ADCYAP1R1,PLA2G12B,NDC1,TM9SF4,RAPGEF4,CEP120,ATP13A3,ARL4C,EFHB,MEF2C,STOML1,ADGRB1,RXRA,WNT7A,NDFIP1,SLC5A9,ATP6V1C2,MAGEL2,SLC10A6,RAB38,SDCBP,NECTIN1,JPT2,PASK,FLVCR1,FGR,TRIM23,ATP6V1B2,SNAP29,C2,GABRA5,NTRK2,IL1RAPL1,NUMB,ADAMTS9,RN7SL767P,COLEC12,PLEKHA3,OCN,STON1-GTF2A1L,SHISA6,MEGF10,TRPM7,KTN1,GRIK1,IREB2,MFSD9,MVB12B,PTK2,CD5L,APOL2,AP4S1,ARHGAP12,DIAPH1,SCAMP1,CYFIP1,UBE3A,APOL1,PITPNC1,AP2B1,SCARA5,SLC26A2,HEATR5A,ICA1,PLCZ1,NOS1AP,MTTP,SLC9A5,SRP9,CCDC88A,NSUN2,SLC27A6,SPAG6,SLC5A1,BICD1,ANO10,TNFSF11,FYN,PPM1F,XPO7,SCN8A,TMEM63C,NCS1,ATP5PF,ATP9B,NALCN,EHBP1,APELA,TRPM3,SLC39A8,SLC16A9,HECW2,CDH2,FBXL20,ZDHHC18,GRM5,TBC1D1,PID1,NRP1,FCHSD2,IFT46,ATPSCKMT,RNF215,CROT,ABCA6,SLC14A1,BCR,NRXN3,ELMO1,KIF16B,ARFGAP3,STK36,NSG2,MB,KCNJ6,RABL2A,CUX1,DPP6,SLC35F1,EPHB2,TSPAN13,CSNK1G1,CD38,MYO5B,RGPD4,MET,DLG2,CDH17,ATP6V0D2,PPFIA2,CDH13,STXBP4,CACNG3,ATG5,MAGI2,SLC35F4,VMP1,KALRN,SLC1A2,GNAS,NUP43,TMPRSS15,ASTN2,GAPVD1,GABRA2,TRAPPC10,DDX6,WDR41,PLIN2,ABL2,VPS13B,TRAPPC6B,TMPRSS3,EXOC4,KCNIP4,ERBB4,FAM3B,SYNDIG1,RGPD2,SAMM50,ANTXR1,SORCS2,TRDN,NLGN1,NOS1,SLC6A3,ASIC2,EFNA5,RAB27A,KIF13A,AP5M1,DNAH9,SLC25A48,KCNQ5,LOXL2,CACNA2D1,IGLC3,IRAG2,PRLR,HTT,ZDHHC11B,FOXB1,CAMK1D,SLC25A18,HLA-F,FER,EYA2,KATNIP,CCR2,PITPNM3,OSBPL5,OSBPL6,IGHV10R21-1,ANO2,GRIA4,AGAP1,IL16,CATSPER2,RAB31,HSPG2,HERPUD1,WASHC1,RGS7,HOK3,CLDN10,BARD1,CLCN5,STK3,SLC13A4</p> |
|--|--|--|---------------------------------------------------------------------------------------------------------------------------------------------------------------------------------------------------------------------------------------------------------------------------------------------------------------------------------------------------------------------------------------------------------------------------------------------------------------------------------------------------------------------------------------------------------------------------------------------------------------------------------------------------------------------------------------------------------------------------------------------------------------------------------------------------------------------------------------------------------------------------------------------------------------------------------------------------------------------------------------------------------------------------------------------------------------------------------------------------------------------------------------------------------------------------------------------------------------------------------------------------------------------------------------------------------------------------------------------------------------------------------------------------------------------------------------------------------------------------------------------------------------------------------------------------------------------------------------------------------------------------------------------------------------------------------------------------------------------------------------------------------------------------------------------------------------------------------------------------------------------------------------------------------------------------------------------------------------------------------------------------------------------------------------------------------------------------------------------------------------------------------------------------------------------------------------------------------------------------------------------------------------------------------------------------------------------------------------------------------------------------------------------------------------------------------------------------------------------------------------------------------------------------------------------------------------------------------------------------------------------------------------------------------------------------------------------------------------------------------------------------------------------------------------------------------------------------------------------------------------------------------------------------------------------------------------------------------------------------------------------------------------------------------------------------------------------------------------------------------------------------------------------------------------------------------------------------------------------------------------------------------------------------------------------------|

|            |                                                     |                        |                                                                                                                                                                                                                                                                                                                                                                                                                                                                                                                                                                                                                                                                                                                                                                                                                                                                                                                                                                                                                                                                                                                                                                                                                                                                                                                                                                                                                                                                                                                                                                                                                                                                                                                                                                                                                                                                                                                                                                                                                                                                                                                                                                                                                                                                                                                                                                                                                                                                                                                                                                                                                                                                                                                                                                                                                                                                                                                                                                                                                                                                                                                                                                                             |
|------------|-----------------------------------------------------|------------------------|---------------------------------------------------------------------------------------------------------------------------------------------------------------------------------------------------------------------------------------------------------------------------------------------------------------------------------------------------------------------------------------------------------------------------------------------------------------------------------------------------------------------------------------------------------------------------------------------------------------------------------------------------------------------------------------------------------------------------------------------------------------------------------------------------------------------------------------------------------------------------------------------------------------------------------------------------------------------------------------------------------------------------------------------------------------------------------------------------------------------------------------------------------------------------------------------------------------------------------------------------------------------------------------------------------------------------------------------------------------------------------------------------------------------------------------------------------------------------------------------------------------------------------------------------------------------------------------------------------------------------------------------------------------------------------------------------------------------------------------------------------------------------------------------------------------------------------------------------------------------------------------------------------------------------------------------------------------------------------------------------------------------------------------------------------------------------------------------------------------------------------------------------------------------------------------------------------------------------------------------------------------------------------------------------------------------------------------------------------------------------------------------------------------------------------------------------------------------------------------------------------------------------------------------------------------------------------------------------------------------------------------------------------------------------------------------------------------------------------------------------------------------------------------------------------------------------------------------------------------------------------------------------------------------------------------------------------------------------------------------------------------------------------------------------------------------------------------------------------------------------------------------------------------------------------------------|
|            |                                                     |                        | , PNPLA8, HNRNPU, VTI1A, RAB3GAP2, CADPS, IGF1R, KCNAB1, PRKAG2, TANGO2, AKAP13, ATP10A, DNM1L                                                                                                                                                                                                                                                                                                                                                                                                                                                                                                                                                                                                                                                                                                                                                                                                                                                                                                                                                                                                                                                                                                                                                                                                                                                                                                                                                                                                                                                                                                                                                                                                                                                                                                                                                                                                                                                                                                                                                                                                                                                                                                                                                                                                                                                                                                                                                                                                                                                                                                                                                                                                                                                                                                                                                                                                                                                                                                                                                                                                                                                                                              |
| GO:0031346 | positive regulation of cell projection organization | 1.4527605720822816e-11 | MTOR, PTPRD, RIPOR2, RP1, RALA, ROBO2, TENM3, CDC42EP3, ALK, AUTS2, CARMIL1, NEGR1, APC, PLPPR5, DSCAM, MACF1, BCL11A, CDH4, NTRK3, PRKD1, RAPGEF2, ARSB, SEPTIN9, STAU2, SEMA5A, FIG4, RAB8B, PAK3, TRPC5, DNM3, COBL, PAFAH1B1, TIAM1, BCAS3, ELAVL4, ABL1, HDAC4, RAP1A, ATP8A2, PLXNA2, ARHGEF7, MARK2, PLCE1, FUT9, CNTN1, SNX3, DISC1, RELN, NIN, ATF1, BBS4, TIOX, LYN, TENM2, NTN1, BMP5, TNN, ROR2, ACTR2, MAP6, NRXN1, ANLN, ALKAL2, NEDD9, ITGA6, GRIP1, CEP120, FBXW8, NCK1, EPHA4, NTRK2, IL1RAPL1, OCLN, FBXO31, MARK4, CYFIP1, SEMA4D, SAXO1, CCDC88A, FYN, ROR1, NRP1, CHODL, CUX1, EPHB2, MAGI2, KALRN, TIAM2, BMP7, ABL2, SLIT2, ROBO1, NLGN1, EFNA5, HTT, CAMK1D, EPS8, WASHC1, IGF1R                                                                                                                                                                                                                                                                                                                                                                                                                                                                                                                                                                                                                                                                                                                                                                                                                                                                                                                                                                                                                                                                                                                                                                                                                                                                                                                                                                                                                                                                                                                                                                                                                                                                                                                                                                                                                                                                                                                                                                                                                                                                                                                                                                                                                                                                                                                                                                                                                                                                                    |
| GO:0065009 | regulation of molecular function                    | 1.9569897049398207e-11 | BCAR3, MTOR, SPOCK1, GARNL3, TRAPPC9, MYO9A, KSR1, PLCB1, DLC1, ZDHHC21, RIPOR2, PDE4D, RDX, ERC1, BCL2, ARHGAP26, CHRNA7, RIMS1, FGD4, SPRED1, ALK, FANK1, ERBIN, RIN2, CACNG2, DLGAP1, EGLN3, SPON1, APC, CRKL, ARHGAP24, PTPRJ, DOCK10, ECKFR, DENND1A, USP14, ANGPT1, CDK12, NEK7, RGS3, RNF220, DOCK2, NEDD4, NTRK3, RXFP1, C5, PHACTR1, DKK2, FLT1, RFC3, RABEP1, DGKI, CAST, SLC8A3, PRKD1, TBC1D19, PAK1, EPHA7, CHRM3, RALGPS1, RAPGEF2, ADGRB3, FGF12, TAOK3, UBE2L3, LDB2, TAF4A, PPP2R2B, SMYD3, HERC2, GRM7, RPTOR, GHR, THADA, RALGAP1, RAPGEF5, TBCD, NEDD4L, PPP1R12B, HDAC9, PHACTR2, APP, CACNA1C, CACNB2, DOCK8, MAPRE2, ARHGAP44, NTF3, ACER2, AURKA, PARN, ST18, SLC8A1, SERPINA6, KCNE4, MAP4K4, BMPR1B, PCSK6, AKAP6, RANBP2, RGS20, RAP1GDS1, NBN, IFT57, PRKCZ, MSH6, MCPH1, ARHGAP32, RGS9, HECW1, MRTFA, DUSP22, EBF2, RIPK4, MAPK1, MGAT5, RABGAP1L, ITIH5, PDGFD, PPP1R1C, ARHGEF17, NRG3, UBE20, CARD18, STK38, TBC1D22A, CHN1, ECT2L, PAFAH1B1, CCNG2, TPM1, NF2, LRRC38, MOB3B, BIRC6, AKAP9, RASGRF2, PPARA, MRTFB, PPP6R3, RGL1, TIAM1, ARAP2, ARHGEF12, PPP2R5E, PLA2R1, EIF3D, DAPK1, SLC24A4, RIC8B, TBC1D9, IL34, ANK2, ADGRV1, BCAS3, RYR2, WNT9B, CLPX, RANBP3L, DUSP16, SMARCA4, TBC1D5, BLK, DOCK4, NUA1, PTPRT, ABL1, HDAC4, SLC1A1, PSMF1, RAP1A, FGF10, LATS2, NRG1, GSG1L, AP3B1, DENND2B, RASGRF1, MUSK, ZNF675, PRKCE, SLC03A1, ASAP2, SLMAP, WNK2, USP33, DENND4C, CD44, RGS12, PTPRO, EGF, PRRC1, ABCC9, TRIO, PDE3A, NSMAF, PEX14, SPRED2, RPS6KA3, SCG5, PTPN2, TRIM5, PLXNA2, MCF2L, RFC1, ARHGEF7, ALG10B, AMBRA1, OPRM1, PRMT8, HTR2A, FANCA, PPP2R2C, STAC, TAF3, MARK2, CNIH3, HERC1, MSH2, EPHA6, HIPK3, CDKN2C, KND1, CLSPN, NOS2, MNAT1, ANK3, HMG2, CCND3, DOCK5, MBP, PLCE1, TGFA, HIP1, CRIM1, VAV1, IQSEC1, DISC1, BLM, PHACTR3, BMP2, EVI5, RALGAP2, SGSM1, TBC1D4, RIN3, BMP2K, NETO2, CABIN1, RELN, ARHGAP42, HMG1, GNAQ, SH3BP5, CPAMD8, TRAF3, ZNF462, DSTYK, DOCK1, RAP1GAP, SRGAP2, SEC23B, SLAMF1, GLI3, SNX6, CNKSR3, IDE, ZNF431, PSD3, MAP2, BTAF1, ZNF618, NEK10, FARP1, MOB1B, ATF2, CYLD, UMODL1, BBS4, MAPK8IP1, GABBR2, CFTR, TBC1D13, KITLG, RCAN1, DAB1, SELENON, NMD3, PRKN, SH3PXD2A, DLGAP2, MAPK10, NGEF, GRIN2A, ARID5B, JPH1, PRKCH, IL6R, ALS2, RACGAP1, NLRC5, TFDP1, DOCK9, SHISA9, PTPRB, ZFP90, COPS8, USP7, VAV3, ITS2, ARHGEF28, RALB, DENND2C, ROCK1, LYN, ARHGAP28, ARHGAP31, CTSS, EIF2B3, SUMO3, MMP16, CRACR2A, INSR, XRCC4, ARFGEF1, BID, SIAH2, ERN2, MBTPS2, CARD10, RALGPS2, ENPP1, UTRN, RASGRP1, SNX9, TME225, CSNK2A1, KCNC1, CSF1, SERPINB9, HCN1, PRKG1, GRIN2B, DCUN1D4, PSAP, CDC14B, GPRC5C, ROR2, PPP2R2A, RASGEF1C, IL10, PTH, LARP6, ITPRIP, IQGAP1, ZBTB7C, ANP32B, NRXN1, PCID2, FRY, FICD, CENPE, NET1, SIPA1L2, TWIST1, ALKAL2, JAK2, MADD, TNKS, PCNA, UFL1, NFKBIA, PRKCB, ABCC8, ANXA4, ZC3H15, RFC2, RTRAF, NEDD9, ITGA6, AGAP9, PPP1R17, ARFGEF3, PDP2, NDFIP2, MAP2K6, MTPN, ABI1, CEMIP, PARK7, MAPK8, ITGA4, OAZ2, PPME1, ADCYAP1R1, NCAPG2, RAPGEF4, MYOCD, CYFIP2, EFHB, ME2C, RXRA, MAP3K5, NDFIP1, MAP3K4, SERPINI2, DBF4B, MLLT1, NCK1, FGR, PPP2R3A, DNMBP, TRIM23, EPHA4, CYTH4, DNMT3L, NTRK2, SHISA6, PRKAB1, PTK2, RCAN2, ARHGAP12, SEMA4D, SERPIN |

|            |                            |                       |                                                                                                                                                                                                                                                                                                                                                                                                                                                                                                                                                                                                                                                                                                                                                                                                                                                                                                                                                                                                                                                                                                                                                                                                                                                                                                                                                                                                                                                                                                                                                                                                                                                                                                                                                                                                                                                                                                                                                                                                                                                                                                                                                                                                                                 |
|------------|----------------------------|-----------------------|---------------------------------------------------------------------------------------------------------------------------------------------------------------------------------------------------------------------------------------------------------------------------------------------------------------------------------------------------------------------------------------------------------------------------------------------------------------------------------------------------------------------------------------------------------------------------------------------------------------------------------------------------------------------------------------------------------------------------------------------------------------------------------------------------------------------------------------------------------------------------------------------------------------------------------------------------------------------------------------------------------------------------------------------------------------------------------------------------------------------------------------------------------------------------------------------------------------------------------------------------------------------------------------------------------------------------------------------------------------------------------------------------------------------------------------------------------------------------------------------------------------------------------------------------------------------------------------------------------------------------------------------------------------------------------------------------------------------------------------------------------------------------------------------------------------------------------------------------------------------------------------------------------------------------------------------------------------------------------------------------------------------------------------------------------------------------------------------------------------------------------------------------------------------------------------------------------------------------------|
|            |                            |                       | <p>B10 , RASGEF1B , AMFR , ASAP1 , NOS1AP , CCDC88A , GPR55 , BICD1 , TNFSF11 , FYN , KDM5A , PPM1F , HDAC2 , SH2D3C , PSME3IP1 , DOCK3 , NCS1 , ZFYVE28 , MAPK9 , ROR1 , HECW2 , GPR137B , EPHB1 , GRM5 , RPS6KA5 , TBC1D1 , NRP1 , ATPSCKMT , ITGA1 , POR , BCR , ELMO1 , RGS6 , PRIM2 , C14ORF39 , ARFGAP3 , FBLN1 , STK36 , RAG1 , SRGAP3 , MAIROH2A1 , EPHB2 , BCL2L13 , RGPD4 , MET , SPPL3 , SERPINB2 , CACNG3 , MAGI2 , VMP1 , KALRN , GNAS , SERPINB7 , TIAM2 , BMP7 , TNFAIP8 , GAPVD1 , GRM3 , PDGFC , WDR41 , ABL2 , TRAPPC6B , SLIT2 , PLCL1 , ERBB4 , SERPINB11 , ROBO1 , PBX1 , PRKCQ , RGPD2 , ANTXR1 , SIPA1L3 , TRDN , MGMT , NLGN1 , NOS1 , EFNA5 , ARHGEF11 , NSD1 , ESR1 , MYO9B , CACNA2D1 , PRLR , HTT , CAMK1D , PIK3R3 , FER , CCR2 , STARD13 , A2M , SPOCK3 , AGAP1 , ROCK2 , RGS8 , PSMD2 , COL4A3 , WASHC1 , RGS7 , STK3 , DEPTOR , RSU1 , HNRNPU , RAB3GAP2 , IGF1R , KCNAB1 , PRKAG2 , AKAP13 , DNM1L</p>                                                                                                                                                                                                                                                                                                                                                                                                                                                                                                                                                                                                                                                                                                                                                                                                                                                                                                                                                                                                                                                                                                                                                                                                                                                                                         |
| GO:0040011 | locomotion                 | 2.984860064457008e-11 | <p>NOTCH2 , MTOR , CNTN4 , LRP12 , PLCB1 , TAF15 , DLC1 , RIPOR2 , RDX , RALA , BCL2 , ROBO2 , SPRED1 , CARMIL1 , MCTP1 , RIN2 , ANO6 , APC , DSCAM , CRKL , PTPRJ , DOCK10 , EGFR , USP14 , ANGPT1 , MACF1 , DOCK2 , SCAI , CDH4 , NTRK3 , C5 , PHACTR1 , FLT1 , NEO1 , CNTN6 , PRKD1 , PAK1 , EPHA7 , RAPGEF2 , ARSB , ONECUT1 , ADAMTSL1 , LDB2 , TFAA4 , CCL28 , ADAM10 , HDAC9 , IL1R1 , APP , MTUS1 , DOCK8 , MAPRE2 , SEMA5A , VCL , NTF3 , SLC8A1 , PTPRR , SRGAP2C , PLGRKT , SRGAP2B , KANK1 , MAP4K4 , BMPR1B , CTNNA2 , PAK3 , DUSP22 , MAPK1 , MGAT5 , ALCAM , PDGFD , NRG3 , NCAM1 , NIPBL , CHN1 , LIMCH1 , TPM1 , NF2 , CTNNA1 , NFIB , PRTG , TIAM1 , PTPRK , ENAH , SEMA3C , NAV3 , AGO2 , IL34 , BCAS3 , SYNE2 , BBS2 , SEMA6D , TNFR , CXADR , DOCK4 , PTPRT , ABL1 , HDAC4 , FGF10 , NRG1 , PRKCE , USP33 , PTPRO , EGF , TRIO , EXT1 , PTPN2 , PLXNA2 , ARHGEF7 , ATP8A1 , BIN2 , SEMA3E , GCSAML , EPHA6 , STK10 , EMILIN2 , BCL11B , DOCK5 , ECE1 , IL17RA , FUT9 , PRR5L , VAV1 , TJP1 , LDLRAD4 , CNTN1 , IQSEC1 , WPCP , SEMA3A , BMP2 , UNC5D , RIN3 , SEMA3D , RELN , HMGB1 , FGF9 , DOCK1 , SRGAP2 , DRAXIN , SLAMF1 , ETS1 , GLI3 , SMOC2 , BBS4 , ITGA9 , KITLG , DCC , RCAN1 , DACH1 , LYST , GRIN2A , IL6R , VAV3 , ROCK1 , LYN , VCAM1 , NTN1 , DPYSL5 , INSR , YTHDF3 , SNAI2 , CD9 , CARD10 , JCAD , TWIST2 , BMP5 , CSF1 , PRKG1 , LAMA3 , TNN , IL33 , ROR2 , LMX1A , IL10 , ABHD2 , VASP , NRXN1 , TWIST1 , AKT3 , JAK2 , ABCC8 , NEDD9 , ITGA6 , GAP43 , MEOX2 , BRMS1L , CMTM7 , CEMIP , CCBE1 , ITGA4 , MYOCD , MEF2C , ADGRB1 , WNT7A , PKN2 , SDCBP , NECTIN1 , NCK1 , FGR , PPP2R3A , CXCL2 , EPHA4 , NUMB , LHX9 , ADAMTS9 , FBXO31 , PTK2 , CDH5 , DIAPH1 , FEZ2 , LAMB1 , CYFIP1 , SEMA4D , JAM2 , WNT5B , TNFSF11 , FYN , PPM1F , HDAC2 , APELA , TET1 , CNTN5 , EPHB1 , GRM5 , RPS6KA5 , PTPRG , NRP1 , PRKCA , ITGA1 , MCC , BCR , NRXN3 , FBLN1 , RRAS2 , BMPER , SRGAP3 , MITF , EPHB2 , MET , CDH13 , MAGI2 , FLRT2 , KALRN , LAMA1 , BMP7 , DLG5 , ZMYND8 , PDGFC , ABL2 , SLIT2 , CCDC141 , ERBB4 , ROBO1 , PRKCQ , EFNA5 , SLIT3 , FRMD5 , NTNG1 , CAMK1D , PIK3R3 , FER , CCR2 , STARD13 , SPOCK3 , SEMA4B , HRH1 , ROCK2 , IL16 , WASHC1 , IGF1R , GLI2 , DNM1L</p> |
| GO:0043412 | macromolecule modification | 4.902367270983254e-11 | <p>BCAR3 , MTOR , PTPRD , TMTC1 , ULK2 , NLK , FTO , KSR1 , AGBL1 , TTC3 , DLC1 , ZDHHC21 , PTPRA , PDE4D , ERC1 , BCL2 , PRDM16 , F13A1 , GPHN , CHRNA7 , PIK3C3 , EPC2 , SPRED1 , GALNT1 , MINAR1 , PCMTD1 , ALK , AUTS2 , PJA2 , BABAM2 , HLCS , MLLT3 , EGLN3 , MAP3K9 , MYO3B , APC , CRKL , SETD2 , ERG , TNIK , PTPRJ , KDM4C , NEK4 , EGFR , USP14 , ANGPT1 , CDK12 , PRKACB , NEK7 , RNF220 , NEDD4 , NSMCE2 , BCL11A , RPRD1A , PTPN4 , B3GALT5 , NTRK3 , LARGE1 , TUSC3 , FBXL7 , FLT1 , SLC8A3 , PRKD1 , TPTE2 , PAK1 , EPHA7 , NCOA7 , CHRM3 , RAPGEF2 , PELI2 , TAOK3 , UBE2L3 , PPP2R2B , PUM3 , PTPRN2 , SMYD3 , TYW1 , HERC2 , RPTOR , GHR , WDSUB1 , THADA , NEDD4L , ADAM10 , HDAC9 , ATF7IP , UBE2G1 , APP , RPS6KA2 , SAMSN1 , KDM1B , KLHL13 , PHKG , DCLK1 , USP18 , NTF3 , ACER2 , PARP15 , AURKA , PARN , SLC8A1 , PTPRR , DTWD2 , MARCHF1 , MAP4K4 , BMPR1B , ARNT , PAK3 , TTLL7 , DIP2B , RANBP2 , ITPKB , TRPC5 , UBE2E2 , HHAT , NBN , RBM47 , PRKCZ , SPOP , MAN2A2 , DIP2A , ST8SIA5 , HECW1 , PHF19 , TAF4B , SENP6 , DUSP22 , GALNT14 , WDR70 , PPM1L , RIPK4 , MAPK1 , MGAT5 , USP25 , KMT2E , PCGF5 , PDGFD , ZNRF3 , XXYLT1 , NRG3 , UBE2O , GFRA1 , NIPBL , GALNT16 , RRGTT , STK38 , PTPN13 , MYLK3 , KANSL1 , LIMCH1 , EFEMP1 , DCAF1 , CCNG2 , TLK1 , NF2 , ZDHHC14 , MOB3B , BIRC6 , AKAP9 , KLF15 , PPP6R3 , UBE3D , RSR1 , PTPRK , PAK5 , ST6GALNAC3 , TRERF1 ,</p>                                                                                                                                                                                                                                                                                                                                                                                                                                                                                                                                                                                                                                                                                                                                                                                                                 |

|            |                                                        |                        |                                                                                                                                                                                                                                                                                                                                                                                                                                                                                                                                                                                                                                                                                                                                                                                                                                                                                                                                                                                                                                                                                                                                                                                                                                                                                                                                                                                                                                                                                                                                                                                                                                                                                                                                                                                                                                                                                                                                                                                                                                                                                                                                                                                                                                                                                                                                                                                                                                                                                                                                                                                                                                                                                                                                                                                                                                                                                                                                                                                                                                                                                                                                                                                                                                                                                                                                                                                                                                                                                                                                                                                                                   |
|------------|--------------------------------------------------------|------------------------|-------------------------------------------------------------------------------------------------------------------------------------------------------------------------------------------------------------------------------------------------------------------------------------------------------------------------------------------------------------------------------------------------------------------------------------------------------------------------------------------------------------------------------------------------------------------------------------------------------------------------------------------------------------------------------------------------------------------------------------------------------------------------------------------------------------------------------------------------------------------------------------------------------------------------------------------------------------------------------------------------------------------------------------------------------------------------------------------------------------------------------------------------------------------------------------------------------------------------------------------------------------------------------------------------------------------------------------------------------------------------------------------------------------------------------------------------------------------------------------------------------------------------------------------------------------------------------------------------------------------------------------------------------------------------------------------------------------------------------------------------------------------------------------------------------------------------------------------------------------------------------------------------------------------------------------------------------------------------------------------------------------------------------------------------------------------------------------------------------------------------------------------------------------------------------------------------------------------------------------------------------------------------------------------------------------------------------------------------------------------------------------------------------------------------------------------------------------------------------------------------------------------------------------------------------------------------------------------------------------------------------------------------------------------------------------------------------------------------------------------------------------------------------------------------------------------------------------------------------------------------------------------------------------------------------------------------------------------------------------------------------------------------------------------------------------------------------------------------------------------------------------------------------------------------------------------------------------------------------------------------------------------------------------------------------------------------------------------------------------------------------------------------------------------------------------------------------------------------------------------------------------------------------------------------------------------------------------------------------------------|
|            |                                                        |                        | <p>PPP2R5E, PDZRN3, DAPK1, STK32B, ALPK2, JARID2, GATAD2B, CP E, IL34, THUMP2, MELK, WNT9B, HECTD4, DUSP16, USP8, PARD3, MAPKAP1, PIAS1, UBE2R2, BLK, ATRX, NUA1, PTPRT, ABL1, PTPN12, HDAC4, OXR1, SLC1A1, PRKAA1, TTLL5, EIPR1, MAST4, ATE1, RAP1A, HECTD2, MORC1, CAMK4, BAZ2A, MANBA, FGF10, TGM1, PEA K1, LATS2, NRG1, AP3B1, ZBTB16, MUSK, GALNTL6, ZNF675, SMAR CAD1, SETDB2, PRKCE, SLC3A1, METAP1D, NXN, WNK2, USP33, CD 44, PTPRO, EGF, ALPK3, PRRC1, TRIO, EXT1, LNPEP, SPRED2, RPS 6KA3, MARCHF8, MTMR3, PTPN2, TRIM5, ATXN3, ST8SIA6, ALG10B, AMBRA1, STK38L, GALNT10, KDM7A, PRMT8, HTR2A, FANCM, FANC A, PPP2R2C, TAF3, RPRD1B, MARK2, C10ORF90, ABHD17C, HERC1, EPHA6, HIPK3, CDKN2C, GRK3, KNDC1, SPSB4, CLSPN, NOS2, STK1 0, MNAT1, TMTC2, MYLK2, HMGA2, CCND3, FOLH1, STK32A, LYPLA1, CWC27, PLCE1, TGFA, FUT9, PRR5L, GXYLT2, MSRA, FBXO32, LDL RAD4, EGFLAM, CNTN1, FKBP5, NAA35, BRCA2, GALNT13, BLM, ASB 7, NRK, BMP2, RC3H2, MYLK4, TRAK1, CDC42BPB, VRK1, TPGS2, BM P2K, RNF38, RELN, GNAQ, FGF9, SH3BP5, UST, TRAF3, DSTYK, UIM C1, B4GALT6, TRIT1, SNX6, CNKSR3, CUL1, DAW1, NEK10, TDRD5, MOB1B, PIGN, ATF2, CYLD, ADARB2, MAPK8IP1, KITLG, ZEEF1, CA MTA1, UBR1, MAP4K3, RCAN1, TADA2A, DAB1, MED27, RB1CC1, MYO 3A, UBE2E1, PTPRE, PRKN, MTMR2, SPSB1, CDC42BPA, MAPK10, ZN F541, FBXO3, WSB1, USP43, TRPM6, PRKCH, HUNK, IL6R, ALS2, MK NK1, SNX25, TOX, PTPRB, TRMT61B, COPS8, ST8SIA1, USP7, MOK, RALB, ROCK1, LYN, SUMO3, DTX1, CHKA, FANCL, RNF152, OTUD7A, INSR, CUL5, NEK6, HECTD1, HDAC11, LYPLAL1, SUMO2, ARFGF1, SNAI2, ASH1L, SIAH2, PIGK, PGAP4, TRABD2B, ERN2, TRIM58, ZD HHC17, NSD2, PTAR1, CARD10, LTN1, ENPP1, ENTPD5, RASGRP1, S NX9, ANAPC1, CSNK2A1, BMP5, CSF1, PPIL6, EOGT, CTDP1, PRKG1, ASB4, FANCB, CLNS1A, SMAD5, MARCHF11, DCUN1D4, PRAME, KLH L7, NSUN6, ATG4B, CDC14B, KDM6A, GPRC5C, ROR2, PPP2R2A, BAN K1, SFPQ, PRKAA2, CSF2RB, RNF182, PHF20L1, IQGAP1, CAMLG, N RXN1, HIPK1, FRY, FICD, CENPE, ELOC, TWIST1, AKT3, ALKAL2, J AK2, MPPE1, MADD, CREBBP, MRM1, TNKS, SIAH3, UFL1, PRKCB, FB XW2, ST6GAL2, RTRAF, BRD4, NEDD9, NRBP1, MAST2, PCMTD2, EXT 2, PDP2, BRMS1L, NDFIP2, MAP2K6, MARCHF6, ABI1, CEMIP, IMPA CT, PARK7, MAPK8, EIF3F, PPME1, FBXL17, UBE2J2, MTF2, NCAPG 2, ASB2, MYOCD, UBE2QL1, ASCC2, ST8SIA4, MEF2C, ADGRB1, MAP 3K5, NDFIP1, MAP3K4, TRIM43B, PRDM13, TRIM43, SUMF1, MAGEL 2, PKN2, DBF4B, FBXW8, SDCBP, NSMCE1, PASK, MLLT1, NCK1, FGR, CDA8, PPP2R3A, TRIM23, TOP1, RNF8, EPHA4, MECOM, DNMT3L, NTRK2, OCLN, SNRPD1, FBXO31, EXTL3, TRPM7, PRKAB1, PTK2, MA RK4, CDH5, UBE3A, SEMA4D, KIRREL1, AMFR, POMT2, NOS1AP, MTT P, DPY19L2, TPTE, PDCL3, CCDC88A, NSUN2, GALNT18, TNFSF11, FYN, BUB1, KDM5A, DPY19L1, PPM1F, SDE2, UHRF2, HDAC2, SLF1, SH2D3C, DOCK3, GALNT17, MTMR7, ZFYVE28, MAPK9, STT3A, SLC3 9A8, ROR1, GALNT2, FUT8, TET1, ASB3, HECW2, EPHB1, ZDHHC18, GRM5, SPOPL, RPS6KA5, PTPRG, PID1, NRPI, MIDEAS, PRKCA, ATP SCKMT, RNF215, USP24, ITGA1, RNF138, RC3H1, POR, ZNF738, SU PT3H, BCR, SNRK, SENP8, USP49, ELP2, FBLN1, STK36, RAG1, BMP ER, MACROH2A1, EPHB2, CSNK1G1, RNF11, DPH6, PPIL2, CDK14, M ET, SPPL3, CAMK1G, METTL15, ATG5, USP32, MAGI2, MYB, KALRN, LAMA1, MFHAS1, TRIM9, BMP7, RNF217, KMT2C, PDGFC, ABL2, EYA 1, TTLL11, SLIT2, PARP8, CNOT7, ESCO1, ERBB4, ROBO1, PRKCQ, MGMT, NOS1, EFNA5, NSD1, EHMT1, USP31, KDM4B, LOXL2, PRLR, P IGB, HTT, ZDHHC11B, CAMK1D, PIK3R3, MACROD2, CDKAL1, FER, E YA2, CHFR, PCMT1, OARD1, SPOCK3, ROCK2, PRDM1, ATAT1, PPP1C B, PDK1, PTPRQ, HERPUD1, NCOA6, TRIM2, WASHC1, BARD1, STK3, DEPTOR, RAB3GAP2, TULP4, IGF1R, PRKAG2, AKAP13, MORC3</p> |
| GO:0051130 | positive regulation of cellular component organization | 1.4223075763738924e-10 | <p>MTOR, ABCA13, PTPRD, PLCB1, RIPOR2, RP1, RALA, ROBO2, SPIRE 1, TENM3, CDC42EP3, ALK, AUTS2, CARMIL1, ANO6, NEGR1, CNTNA P2, APC, PLPPR5, DSCAM, PTPRJ, ANGPT1, MACF1, NEK7, NSMCE2, BCL11A, CDH4, NTRK3, CRACD, PRKD1, PAK1, RAPGEF2, ADGRB3, A RSB, SEPTIN9, NEDD4L, ATF7IP, APP, STAU2, MAPRE2, SEMA5A, S YT1, NTF3, AURKA, PARN, FIG4, MAP4K4, RAB8B, PAK3, TRPC5, DN M3, NBN, COBL, MAPK1, ANKFY1, SPIDR, MYLK3, LIMCH1, FMN1, PA FAH1B1, VPS13D, TPM1, NF2, AKAP9, SNX30, SYNJ1, TIAM1, NAV3</p>                                                                                                                                                                                                                                                                                                                                                                                                                                                                                                                                                                                                                                                                                                                                                                                                                                                                                                                                                                                                                                                                                                                                                                                                                                                                                                                                                                                                                                                                                                                                                                                                                                                                                                                                                                                                                                                                                                                                                                                                                                                                                                                                                                                                                                                                                                                                                                                                                                                                                                                                                                                                                                                                                                                                                                                                                                                                                                                                                                                                                                                                                                          |

|                |                                              |                                    |                                                                                                                                                                                                                                                                                                                                                                                                                                                                                                                                                                                                                                                                                                                                                                                                                                                                                                                                                                                                                                                                                                                                                                                                                                                                                                                                                                                                                                                  |
|----------------|----------------------------------------------|------------------------------------|--------------------------------------------------------------------------------------------------------------------------------------------------------------------------------------------------------------------------------------------------------------------------------------------------------------------------------------------------------------------------------------------------------------------------------------------------------------------------------------------------------------------------------------------------------------------------------------------------------------------------------------------------------------------------------------------------------------------------------------------------------------------------------------------------------------------------------------------------------------------------------------------------------------------------------------------------------------------------------------------------------------------------------------------------------------------------------------------------------------------------------------------------------------------------------------------------------------------------------------------------------------------------------------------------------------------------------------------------------------------------------------------------------------------------------------------------|
|                |                                              |                                    | , BCAS3, TBC1D5, ATRX, ELAVL4, ABL1, HDAC4, RAP1A, GRID2, NR<br>G1, INO80D, CLIP1, ABCB7, SETDB2, PRKCE, EGF, ATP8A2, PLXNA<br>2, ARHGEF7, ATP8A1, AMBRA1, MARK2, LINGO2, PLCE1, TGFA, HIP<br>1, FUT9, NPHP4, CNTN1, IQSEC1, SNX3, DISC1, BMP2, RESF1, REL<br>N, NFATC2, UNC13B, NIN, ATF1, BBS4, PRKN, FRMPD4, CNOT6L, TO<br>X, RALB, ROCK1, LYN, TENM2, NTN1, INSR, BMF, DDHD1, PDE4DIP,<br>BID, TRABD2B, TRIM58, FYCO1, SH3GLB1, SNX9, BMP5, INO80, TN<br>N, ROR2, ACTR2, SFPQ, CLSTN2, MAP6, VASP, MORC2, NRXN1, ANLN<br>, ALKAL2, MELTF, TNKS, ABCC8, NEDD9, ITGA6, GRIP1, PARK7, MA<br>PK8, CEP120, ADGRB1, WNT7A, MAP3K4, WASF3, MAGEL2, RAD51AP<br>1, FBXW8, SDCBP, NCK1, EPHA4, NTRK2, IL1RAPL1, OCLN, FBXO31<br>, MARK4, CDH5, MPP7, CYFIP1, SEMA4D, RUNX1, KIRREL1, SAXO1,<br>ASAP1, CCDC88A, BICD1, FYN, PPM1F, ADGRL2, SLF1, MAPK9, APE<br>LA, ROR1, EPHB1, ADCK1, NRP1, FCHSD2, CHODL, CUX1, MACROH2A<br>1, EPHB2, TOGARAM1, MET, CDH17, MAGI2, FLRT2, KALRN, TIAM2,<br>BMP7, DLG5, ABL2, SLIT2, SYNDIG1, ROBO1, PRKCQ, NLGN1, ASIC<br>2, EFNA5, ESR1, HTT, CAMK1D, FER, EPS8, ROCK2, STMP1, ATAT1,<br>DMRT1, RAB31, WASHC1, RAB3GAP2, IGF1R, ATP10A, DNMI1L                                                                                                                                                                                                                                                                       |
| GO:00<br>50807 | regulation<br>of synapse<br>organizati<br>on | 1.50293<br>9495876<br>7202e-<br>10 | PTPRD, IL1RAPL2, LRFN2, CDH8, ROBO2, NEGR1, GPC6, NEDD4, NT<br>RK3, EPHA7, ADGRB3, APP, STAU2, ARHGAP44, CTNNA2, PAK3, DNM<br>3, PAFAH1B1, TANC1, ABL1, LRFN5, GRID2, MUSK, DGKB, PTPRO, A<br>BHD17C, LINGO2, PDLIM5, DISC1, RELN, FARP1, NGEF, FRMPD4, S<br>HANK2, NTN1, COLQ, TANC2, GRIN2B, IL10, ACTR2, CLSTN2, NRXN<br>1, NEDD9, MEF2C, ADGRB1, WNT7A, NECTIN1, EPHA4, NTRK2, IL1R<br>APL1, CYFIP1, UBE3A, PCDH8, SEMA4D, FYN, ADGRL2, CDH2, EPHB<br>1, EPHB2, PPFA12, FLRT2, KALRN, DLG5, SYNDIG1, NLGN1, CTTNB<br>P2, ASIC2, EFNA5, C1QL3                                                                                                                                                                                                                                                                                                                                                                                                                                                                                                                                                                                                                                                                                                                                                                                                                                                                                                 |
| GO:00<br>30029 | actin<br>filament-<br>based<br>process       | 3.11542<br>9395493<br>357e-10      | NOTCH2, MTOR, SGCD, NEBL, SVIL, MICAL3, DLC1, PDE4D, RDX, RA<br>LA, BCL2, MYO5A, ARHGAP26, SPIRE1, FGD4, MYO1E, CDC42EP3, A<br>UTS2, CARMIL1, RHPN2, PARVB, MYO5C, TNIK, CTNNA3, DOCK2, DI<br>APH3, NTRK3, PHACTR1, CRACD, PAK1, FGF12, EPB41L3, NEDD4L,<br>PHACTR2, CACNA1C, CACNB2, STAU2, SEMA5A, ARHGAP44, NTF3, C<br>D2AP, FRMD3, KANK1, KCNE4, FMN2, THSD7A, CTNNA2, PAK3, RAP1<br>GDS1, CALD1, KLHL1, MRTFA, COBL, ARHGEF17, CORO2B, MYLK3, L<br>IMCH1, FMN1, PAFAH1B1, TPM1, NF2, CTNNA1, PPP1R9A, AKAP9, M<br>PRIP, ENAH, ANK2, BCAS3, RYR2, SYNE2, AIF1L, LDB3, CXADR, XI<br>RP2, ABL1, GAS2, FGF10, PRKCE, PGM5, ABCC9, ATXN3, SEMA3E, T<br>MOD2, SH3KBP1, MYLK2, MYOM2, HIP1, TJP1, NPHP4, PACSIN2, IQ<br>SEC1, PDLIM5, NRK, PHACTR3, CDC42BPB, PLS1, SRGAP2, MYL1, F<br>ARP1, BBS4, THSD7B, PRKN, CDC42BPA, PCDH15, FRMPD4, RACGAP<br>1, KANK4, KCND3, MYO1D, ROCK1, ARHGAP28, SHROOM3, ARFGEF1,<br>FLNB, UTRN, SNX9, PRKG1, MICALL2, FAT1, ACTR2, VASP, IQGAP1<br>, ANLN, JAK2, SMTN, USH1C, NEDD9, ARFGEF3, SHROOM2, MTPN, AB<br>I1, ASB2, HMCN1, CYFIP2, WASF3, MAGEL2, SDCBP, NCK1, AKAP11<br>, TRPM7, ARHGAP12, DIAPH1, CYFIP1, FRMD6, KIRREL1, PSTPIP2<br>, NOS1AP, SORBS2, PDCL3, CCDC88A, PPM1F, EHBP1, SPTB, NRP1,<br>FCHSD2, BCR, ELMO1, MYO5B, MET, SPECC1, NRAP, FAM171A1, EPB<br>41L4A, ABL2, FHOD3, SLIT2, ANTXR1, EFNA5, GAS2L1, ARHGEF11<br>, FRMD5, MYO9B, CACNA2D1, FER, STARD13, EPS8, ROCK2, WASHC1<br>, AKAP13 |
| GO:00<br>07267 | cell-cell<br>signaling                       | 3.27888<br>6830060<br>6663e-<br>10 | CNTN4, NSG1, PTPRD, SLC24A2, LRRC4C, NLK, UNC13C, PLCB1, PT<br>PRA, STXBP1, ERC1, LRFN2, CDH8, CHRNA7, RIMS1, GABRB3, ENPE<br>P, RIMS2, MCTP1, SV2C, CACNG2, DLGAP1, MLLT3, GPC6, APC, TSH<br>Z3, CRKL, ILDR2, TNIK, SLC4A10, EGFR, RFX3, USP14, MACF1, RN<br>F220, CRB1, BTBD9, GRIK3, DKK2, GABRB1, DGKI, INVS, GRIA1, S<br>LC8A3, CHRM3, RAPGEF2, FGF12, GABRA6, PRICKLE2, PTPRN2, SY<br>N2, GRM7, ADAM10, APP, RPS6KA2, CACNA1C, CACNB2, STAU2, GAB<br>RG2, SEMA5A, SYT1, NTF3, NDUFAF2, PYGO1, KANK1, RAB8B, ERC2<br>, SYN3, PRKCZ, GRB10, HECW1, SV2B, YAP1, MAPK1, CADPS2, HRH2<br>, PLG, SYT10, ZNRF3, NRG3, SLC16A1, HRH4, SORCS3, PAFAH1B1,<br>TM7SF3, ITGB8, GRIK4, PPP1R9A, AKAP9, KLF15, RASGRF2, SYNJ<br>1, TIAM1, GRM1, GABRG1, PCDH11Y, TMEM108, ALPK2, AMPH, CPE,<br>ANK2, RYR2, WNT9B, SMARCA4, CDH11, USP8, BLK, TNR, GRM8, CXA<br>DR, ELAVL4, ABL1, SLC1A1, PRKAA1, RIMBP2, EIPR1, RAP1A, GPC<br>5, FGF10, GRID2, LATS2, NRG1, ASPM, RASGRF1, PRKCE, NXN, WNK<br>2, DGKB, PTPRO, EGF, P2RX6, EXT1, LNPEP, LIMD1, RPS6KA3, CTN                                                                                                                                                                                                                                                                                                                                                                                                |

|            |                           |                       |                                                                                                                                                                                                                                                                                                                                                                                                                                                                                                                                                                                                                                                                                                                                                                                                                                                                                                                                                                                                                                                                                                                                                                                                                                                                                                                                                                                                                                                                                                                                                                                                                                                                                                                                                                                                                                                                                                                                                                                                                                                                                                                                                                                                                                                                                                                                                                                                                                                                                                                                                                                                                                                                                                      |
|------------|---------------------------|-----------------------|------------------------------------------------------------------------------------------------------------------------------------------------------------------------------------------------------------------------------------------------------------------------------------------------------------------------------------------------------------------------------------------------------------------------------------------------------------------------------------------------------------------------------------------------------------------------------------------------------------------------------------------------------------------------------------------------------------------------------------------------------------------------------------------------------------------------------------------------------------------------------------------------------------------------------------------------------------------------------------------------------------------------------------------------------------------------------------------------------------------------------------------------------------------------------------------------------------------------------------------------------------------------------------------------------------------------------------------------------------------------------------------------------------------------------------------------------------------------------------------------------------------------------------------------------------------------------------------------------------------------------------------------------------------------------------------------------------------------------------------------------------------------------------------------------------------------------------------------------------------------------------------------------------------------------------------------------------------------------------------------------------------------------------------------------------------------------------------------------------------------------------------------------------------------------------------------------------------------------------------------------------------------------------------------------------------------------------------------------------------------------------------------------------------------------------------------------------------------------------------------------------------------------------------------------------------------------------------------------------------------------------------------------------------------------------------------------|
|            |                           |                       | <p>ND2, SCG5, ATXN3, HTR2C, RIC3, ARHGEF7, LTBP1, OPRM1, ABCC4, HTR2A, KREMEN1, MARK2, TMOD2, APBA2, SH3KBP1, KCND2, NOS2, MDFIC, MYLK2, HMGA2, MBP, NPHP4, PACSIN2, SNX3, DISC1, STRN, BMP2, PSG9, MYRIP, RELN, GNAQ, FGF9, UNC13B, TTC21B, DRAXIN, CCDC186, GLI3, CGAS, GABRR2, GRIK2, MCTP2, FARP1, CYLD, GABBR2, CFTR, KPNA1, ZZEF1, DCC, CHRM5, PRKN, MTMR2, DLGAP2, GRIN2A, LALBA, ALS2, KCNQ3, SHISA9, SCN10A, SHANK2, MESD, SOX30, LYN, ZBTB33, PLCB4, GRID1, COLQ, NMU, SNAI2, SIAH2, RPH3A, TRABD2B, GABRG3, IGSF11, NDRG2, CSNK2A1, GHRH, HCN1, GRIN2B, GPR156, CELF4, TNN, ROR2, FAT1, CLSTN2, PTH, SOSTDC1, PRKAA2, PLA2G4A, RPS12, AIMP1, NRXN1, CD70, JAK2, HCRT1, CELSR2, TNKS, PRKCB, ABCC8, CACNA1E, SLC6A1, GID8, MAP2K6, PARK7, RAPGEF4, MEF2C, ADGRB1, WNT7A, S100B, ATP6V1C2, OR10H2, SDCBP, WWOX, PASK, PPP2R3A, SNAP29, EPHA4, GABRA5, NTRK2, IL1RAPL1, WNT2B, SHISA6, GRIK1, ANKRD6, SCGN, CYFIP1, PCDH8, WNT5B, AMFR, ICA1, CCDC88A, TNFSF11, FYN, RBMS3, ROR1, CDH2, FBXL20, EPHB1, GRM5, TBC1D1, NRP1, FCHSD2, RNF138, MCC, BCR, NRXN3, PRDM15, MITF, EPHB2, CSNK1G1, CD38, CDK14, DLG2, STXB4, CACNG3, MAGI2, KALRN, SLC1A2, GABRA2, TMEM25, GRM3, EXOC4, PLCL1, FAM3B, TRHDE, SORCS2, NLGN1, NOS1, SLC6A3, ASIC2, EFNA5, DTNA, NTNG1, CACNA2D1, CCR2, HRH1, RGS8, STK3, ZNF423, CADPS, APCDD1, GLI2</p>                                                                                                                                                                                                                                                                                                                                                                                                                                                                                                                                                                                                                                                                                                                                                                                                                                                                                                                                                                                                                                                                                                                                                                                                                                                                                                                                                                |
| GO:0019538 | protein metabolic process | 3.380785071000752e-10 | <p>BCAR3, MTOR, SPOCK1, NSG1, IMP2L, PTPRD, TMTC1, ULK2, NLK, LONP2, FTO, KSR1, AGBL1, PLCB1, TTC3, TMPSR2, DLC1, TNRC6B, DPP10, ZDHC21, PTPRA, PDE4D, RDX, ERC1, BCL2, PRDM16, F13A1, GPHN, CHRNA7, PIK3C3, EPC2, SPRED1, GALNT1, ENPEP, MINAR1, PCMTD1, ALK, AUTS2, PJA2, BABAM2, PAPP2, HLCS, MLLT3, EGLN3, MAP3K9, MYO3B, MOCOS, SPON1, CPA6, APC, RTN1, CRKL, SED2, ERG, TNK1, PTPRJ, KDM4C, NEK4, EGFR, USP14, ANGPT1, CDK12, PRKACB, NEK7, RNF220, NEDD4, MTRF1, GNPTAB, NSMCE2, BCL11A, PSMB2, CHSY1, RPRD1A, PTPN4, B3GALT5, NTRK3, LARGE1, C5, TUSC3, FBXL7, FLT1, ADAMTS6, TASP1, PSMA8, CAST, SLC8A3, PRKD1, TPTE2, PAK1, EPHA7, NCOA7, CHRM3, CHSY3, RAPGEF2, PELI2, LRP2, TAOK3, LDLRAD3, CPEB4, UBE2L3, PPP2R2B, PUM3, PTPRN2, SMYD3, HERC2, RPTOR, GHR, WDSUB1, NEDD4L, ADAM32, ADAM10, HDAC9, UBE2G1, APP, RPS6KA2, SAMS1, KDM1B, KLHL13, PHKB, DCLK1, USP18, NTF3, ACER2, PARP15, CD2AP, AURKA, PARN, ST18, SLC8A1, PTPRR, MARCHF1, SERPINA6, PLGRKT, ECPAS, MAP4K4, BMPR1B, FMN2, PCSK6, ARNT, PAK3, TTL7, DIP2B, RANBP2, LARP1, ITPKB, TRPC5, UBE2E2, RAP1GDS1, HHAT, CHST8, NBN, IFT57, PRKCZ, SPOP, MAN2A2, DIP2A, ST8SIA5, HECW1, ADAMTS17, PHF19, TAF4B, SENP6, DUSP22, GALNT14, SEM1, WDR70, PPM1L, RPK4, MAPK1, MGAT5, ITIH5, SGTB, ADAM22, USP25, KMT2E, PLG, PAPP2, PCGF5, PDGFD, ZNRF3, XXLT1, NRG3, UBE20, GFRA1, NIPBL, GALNT16, RRGTT, CARD18, STK38, PTPN13, MYLK3, KANSL1, LMCH1, ATF6, EFEMP1, TLL1, DCAF1, CCNG2, TLK1, NF2, MRPS22, ZDHC14, CORIN, MOB3B, BIRC6, AKAP9, KLF15, PPARA, ERMP1, PP6R3, ADAMTS3, UBE3D, RSRC1, PTPRK, PAK5, ST6GALNAC3, TRERF1, PPP2R5E, PDZRN3, EIF3D, DAPK1, AGO2, STK32B, ALPK2, JARID2, GATAD2B, CPE, IL34, ADGRV1, MELK, WNT9B, HECTD4, CLPX, DUSP16, MRPS35, USP8, PARD3, MAPKAP1, TNRC6C, PIAS1, UBE2R2, BLK, ATRX, NUA1, PTPRT, ELAVL4, ABL1, PTPN12, HDAC4, OXR1, SLC1A1, PRKAA1, MRPS27, TTL5, EIPR1, ADAMTS14, MAST4, PSMF1, ATE1, RAP1A, HECTD2, CAMK4, BAZ2A, MANBA, FGF10, FBXL13, TGM1, PEAK1, LATS2, NRG1, AP3B1, ZBTB16, MUSK, GALNTL6, ZNF675, SMARCA1, SETDB2, PRKCE, SLC3A1, METAP1D, NXN, WNK2, USP33, CD44, PTPRO, EGF, ALPK3, PRRC1, TRIO, EXT1, LNPEP, SPRED2, ADAMTS2, RPS6KA3, MARCHF8, SCG5, MTMR3, PTPN2, TRIM5, ATXN3, ST8SIA6, ALG10B, AMBRA1, STK38L, GALNT10, KDM7A, PRMT8, HTR2A, FANCM, FANCA, DAZL, FARS2, PPP2R2C, TAF3, RPRD1B, MARK2, TMEM67, C10ORF90, ABHD17C, PUM1, HERC1, IGF2BP3, EPHA6, SLC2A13, HIPK3, CDKN2C, GRK3, CPXM2, KND1, SPSB4, CLSPN, NOS2, AFG3L2, STK10, MNAT1, TMTC2, ADAM12, MYLK2, XYLT1, HMGA2, CCND3, FOLH1, ECE1, STK32A, LYPLA1, MBP, CWC27, PLCE1, TGFA, IL17RA, HIP1, CRIM1, XPNPEP1, FUT9, PRR5L, GXYLT2, VPS37A, CAPN5, MSRA, FBXO32, LDLRAD4, EGFLAM, CNTN</p> |



|            |                                    |                       |                                                                                                                                                                                                                                                                                                                                                                                                                                                                                                                                                                                                                                                                                                                                                                                                                                                                                                                                                                                                                                                                                                                                                                                                                                                                                                                                                                                                                                                                                                                                                                                                                                                                                                                                                                                                                                                                                                                                                                                                                                                                                                                                                                                                                                                                                                                                                                                                                                                                                                                                                                                                                                                                                                                                                                                                                                                                                                                                                                                                                                                                                                                                                                                                                                |
|------------|------------------------------------|-----------------------|--------------------------------------------------------------------------------------------------------------------------------------------------------------------------------------------------------------------------------------------------------------------------------------------------------------------------------------------------------------------------------------------------------------------------------------------------------------------------------------------------------------------------------------------------------------------------------------------------------------------------------------------------------------------------------------------------------------------------------------------------------------------------------------------------------------------------------------------------------------------------------------------------------------------------------------------------------------------------------------------------------------------------------------------------------------------------------------------------------------------------------------------------------------------------------------------------------------------------------------------------------------------------------------------------------------------------------------------------------------------------------------------------------------------------------------------------------------------------------------------------------------------------------------------------------------------------------------------------------------------------------------------------------------------------------------------------------------------------------------------------------------------------------------------------------------------------------------------------------------------------------------------------------------------------------------------------------------------------------------------------------------------------------------------------------------------------------------------------------------------------------------------------------------------------------------------------------------------------------------------------------------------------------------------------------------------------------------------------------------------------------------------------------------------------------------------------------------------------------------------------------------------------------------------------------------------------------------------------------------------------------------------------------------------------------------------------------------------------------------------------------------------------------------------------------------------------------------------------------------------------------------------------------------------------------------------------------------------------------------------------------------------------------------------------------------------------------------------------------------------------------------------------------------------------------------------------------------------------------|
|            |                                    |                       | <p>1,TARS3,FKBP5,SNX3,NAA35,BRCA2,DISC1,GALNT13,DNER,BLM,ASB7,NRK,BMP2,RC3H2,MYLK4,TRAK1,WDR26,CDC42BPB,DSE,VRK1,RANBP9,TPGS2,BMP2K,RNF38,PGPEP1,RELN,HMGB1,GNAQ,FGF9,SH3BP5,UST,CPAMD8,TRAF3,GEMIN5,DSTYK,UIMC1,B4GALT6,GLI3,SMARCC1,SNX6,CNKSR3,CASP5,IDE,CUL1,DW1,NEK10,RRBP1,MOB1B,PIGN,ATF2,CYLD,UMODL1,MAPK8IP1,NELL1,MRPL13,KITLG,ZZEF1,CAMTA1,UBR1,MAP4K3,HS3ST4,RCAN1,TADA2A,DAB1,MED27,RB1CC1,MYO3A,UBE2E1,PTPRE,PRKN,MTMR2,SPSB1,CDC42BPA,MAPK10,ZNF541,FBXO3,GRIN2A,WSB1,USP43,TRPM6,PRKCH,HUNK,IL6R,PEPD,ALS2,CPVL,ACO1,CNOT6L,MKNK1,SNX25,PTPRB,AOPEP,COPS8,TSPAN33,ST8SIA1,USP7,PSMA1,MOK,RALB,ROCK1,LYN,SEL1L,CTSB,EIF2B3,SUMO3,DTX1,BZW1,PIWIL3,CHKA,MMP16,FANCL,BANP,RNF152,OTUD7A,INSR,CUL5,YTHDF3,NEK6,HECTD1,HDAC11,LPLAL1,SUMO2,ADAMTS19,ARFGEF1,SNAI2,ASH1L,BID,STAH2,PTGK,PGAP4,TRABD2B,UFD1,ERN2,MBTPS2,TRIM58,ZDHHC17,NSD2,PTAR1,CARD10,LTN1,CTIF,ENPP1,ENTPD5,MOCSS2,RASGRP1,SNX9,PAMR1,ANAPC1,CSNK2A1,BMP5,CSF1,PPIL6,EOGT,SERPINB9,CTDP1,PRKG1,HS6ST3,ASB4,GRIN2B,FANCL,CLNS1A,CNMD,SMAD5,CELF4,ABCG1,MARCHF11,DCUN1D4,PRAME,KLHL7,PSMA5,ATG4B,CDC14B,KDM6A,IL33,GPRC5C,ROR2,CFH,PPP2R2A,BANK1,CSDE1,IL10,SFPQ,PRKAA2,CSF2RB,RNF182,LARP6,PHF20L1,IQGA1,RPS12,CAMLG,ANP32B,YBX3,AIMP1,NRXN1,PCID2,HIPK1,FRY,FICD,CENPE,NGDN,ELOC,TWIST1,AKT3,ALKAL2,JAK2,ADAM28,MPPE1,MADD,PATL1,PRSS2,CREBBP,MELTF,TNKS,STAH3,UFL1,ADAMTS5,NFKBIA,PRKCB,FBXW2,MIPBP,OVCH1,ZC3H15,ST6GAL2,RTRAF,BRD4,NEDD9,NRBP1,IARS2,CLCA4,CNDP2,MAST2,ERLIN2,PCMTD2,EXT2,AGO1,PDP2,GID8,BRMS1L,NDFIP2,MAP2K6,MARCHF6,MTPN,ABI1,CEMIP,IMPACT,CCBE1,PARK7,ADAMTS18,MAPK8,OAZ2,EIF3F,PMME1,FBXL17,UBL7,UBE2J2,MTF2,NCAPG2,ASB2,MYOCD,CYFIP2,UBE2QL1,ACACA,ASCC2,ST8SIA4,MEF2C,ADGRB1,WNT7A,MAP3K5,NDPFP1,MAP3K4,TRIM43B,SERPINT2,PRDM13,TRIM43,SUMF1,MAGEL2,PKN2,DBF4B,FBXW8,SDCBP,SPPL2B,NSMCE1,PASK,MLLT1,NCK1,FGR,CDCA8,PPP2R3A,TRIM23,TOP1,TINAG,C2,RNF8,EPHA4,MECOM,NTRK2,ADAMTS9,OCN,FBXO31,EXTL3,TRPM7,PRKAB1,IRESB2,MVB12B,HS6ST1,PTK2,MARK4,CDH5,CD5L,APOL2,CYFIP1,UBE3A,APOL1,SEMA4D,SERPINB10,RUNX1,KIRREL1,AMFR,CTSE,POMT2,NOS1AP,MTPP,DPY19L2,TPTE,PDCL3,SRP9,CCDC88A,UBAP1L,GALNT18,ADAMTS16,TNFSF11,FYN,BUB1,KDM5A,DPY19L1,PPM1F,SDE2,UHRF2,HDAC2,SLF1,SH2D3C,PSME3IP1,DOCK3,TRNAU1AP,GALNT17,MTMR7,ZFYVE28,MAPK9,PABPC1,STT3A,SLC39A8,ROR1,GALNT2,FUT8,TET1,ASB3,HECW2,OVCH2,SEL1L2,FBXL20,EPHB1,ZDHHC18,GRM5,SPOPL,RPS6KA5,PTPRG,PID1,NRP1,MIDEAS,PRKCA,MRPL58,ATPSCKMT,RNF215,USP24,FHIT,ITGA1,RNF138,RC3H1,POR,EFL1,ZNF738,SUPT3H,BCR,TUT4,SNRK,TM9SF2,SENP8,USP49,ELP2,FBLN1,STK36,RAG1,DNPEP,BMPER,DPP6,MACROH2A1,EPHB2,CSNK1G1,BCL2L13,RNF11,DPH6,PPIL2,PRSS51,CDK14,MET,SPPL3,CAMK1G,SERPINB2,ATG5,USP32,MAGI2,UNK,ADAM29,MYB,KALRN,CHST3,LAMA1,MFHAS1,SERPINB7,CPQ,TRIM9,DHX29,BMP7,TMPRSS15,TNFAIP8,RNF217,PRSS23,KMT2C,DDX6,PDGFC,ABL2,MMP26,MRPL37,BACE2,NECAB1,EYA1,TTL11,SLIT2,PARP8,TMPRSS3,CNOT7,ESCO1,ERBB4,SERPINB11,GSAP,TRHDE,ROBO1,SAMD4A,PRKCQ,ANTXR1,MGMT,NOS1,PRR16,EFNA5,NSD1,EHMT1,USP31,KDM4B,LOXL2,PRLR,PIGB,AGO3,HTT,LARS2,ZDHC11B,CAMK1D,PIK3R3,MACROD2,CDKAL1,FER,EYA2,A2M,CHFR,PCMT1,OARD1,SPOCK3,ROCK2,PRDM1,ATAT1,NARS2,EIF4G3,PPP1CB,PKD1,PSMD2,PTPRQ,HERPUD1,NCOA6,TRIM2,COL4A3,WASHC1,PCSK2,BARD1,STK3,DEPTOR,HNRNPUL1,LINC00240,RAB3GAP2,TULP4,IGF1R,PRKAG2,AKAP13,MORC3</p> |
| GO:1902531 | regulation of intracellular signal | 5.138487690619894e-10 | <p>NOTCH2,BCAR3,MTOR,WWC1,GARNL3,MYO9A,KSR1,PLCB1,DLC1,RIPOR2,PDE4D,RDX,BCL2,ARHGAP26,CHRNA7,AKR1C3,FGD4,SPRED1,MTNAR1,ALK,AUTS2,PJA2,BABAM2,ERBIN,CRKL,ARHGAP24,TNIN,PTPRJ,EGFR,DENND1A,ANGPT1,NCOR1,DOCK2,NEDD4,SCAI,SGMS1,NTRK3,ZFAND6,FLT1,MAPKB1,DGKI,EDAR,P</p>                                                                                                                                                                                                                                                                                                                                                                                                                                                                                                                                                                                                                                                                                                                                                                                                                                                                                                                                                                                                                                                                                                                                                                                                                                                                                                                                                                                                                                                                                                                                                                                                                                                                                                                                                                                                                                                                                                                                                                                                                                                                                                                                                                                                                                                                                                                                                                                                                                                                                                                                                                                                                                                                                                                                                                                                                                                                                                                                                          |

|            |                                           |                       |                                                                                                                                                                                                                                                                                                                                                                                                                                                                                                                                                                                                                                                                                                                                                                                                                                                                                                                                                                                                                                                                                                                                                                                                                                                                                                                                                                                                                                                                                                                                                                                                                                                                                                                                                                                                                                            |
|------------|-------------------------------------------|-----------------------|--------------------------------------------------------------------------------------------------------------------------------------------------------------------------------------------------------------------------------------------------------------------------------------------------------------------------------------------------------------------------------------------------------------------------------------------------------------------------------------------------------------------------------------------------------------------------------------------------------------------------------------------------------------------------------------------------------------------------------------------------------------------------------------------------------------------------------------------------------------------------------------------------------------------------------------------------------------------------------------------------------------------------------------------------------------------------------------------------------------------------------------------------------------------------------------------------------------------------------------------------------------------------------------------------------------------------------------------------------------------------------------------------------------------------------------------------------------------------------------------------------------------------------------------------------------------------------------------------------------------------------------------------------------------------------------------------------------------------------------------------------------------------------------------------------------------------------------------|
|            | transduction                              |                       | <p>RKD1,TPTE2,PAK1,EPHA7,RALGPS1,RAPGEF2,PELI2,LRP2,TAOK3,RPTOR,GHR,RALGAPA1,APP,DOCK8,MAPRE2,SEMA5A,ARHGAP44,NTF3,CD2AP,AURKA,PTPRR,KANK1,MAP4K4,AKAP6,HOME R2,PAK3,ITPKB,PDE10A,RAP1GDS1,KICS2,PRKCZ,ARHGAP32,DUSP22,MAPK1,PDGFD,ARHGEF17,STK38,PTPN13,CHN1,HRH4,PAFAH1B1,NF2,MOB3B,RASGRF2,PPARA,TIAM1,GRM1,ARHGEF12,PAK5,PLA2R1,SLC24A4,SEC14L1,IL34,ADGRV1,DUSP16,MAPKAP1,NUAK1,ABL1,PRKAA1,NFAT5,GUCY1A2,RAP1A,FGF10,ZC3HAV1,NRG1,DENND2B,RASGRF1,ZNF675,PRKCE,WNK2,DENND4C,CD44,EGF,TRIO,PDE3A,LIMD1,SPRED2,PTPN2,TRIM5,MCF2L,HTR2C,CLEC16A,OPRM1,HTR2A,SEMA3E,FHL2,PUM1,ANKRD17,RELL1,HIPK3,MDFIC,PLCE1,TGFA,HIP1,PRR5L,VAV1,IQSEC1,BRCA2,NRK,SEMA3A,MAGI3,BMP2,RC3H2,GNAI1,RALGAPA2,RANBP9,TMEM161A,LEMD3,RELN,ARHGAP42,HMGB1,TRAF3,DESTYK,RAP1GAP,SRGAP2,SLAMF1,CNKSR3,PSD3,GAREM1,NEK10,CYLD,MAPK8IP1,KITLG,CAMTA1,UBR1,SLC30A10,RCAN1,RB1CC1,PRKN,NGEF,IL6R,ALS2,RACGAP1,SHANK2,USP7,VAV3,ARHGEF28,ROCK1,LYN,ARHGAP28,ARHGAP31,SLC44A2,SLC15A2,RRAGD,CRACR2A,RNF152,OTUD7A,INSR,NEK6,ARFGEF1,SNAI2,ASH1L,BID,UFD1,ERN2,TIAL1,ZDHHC17,RALGPS2,JCAD,RASGRP1,NDRG2,CSF1,BCL2L1,ROR2,KL,BANK1,SFPQ,PRKAA2,ND C80,IQGAP1,YBX3,NRXN1,PCID2,NET1,SIPA1L2,TWIST1,AKT3,ALKAL2,JAK2,RPF2,MADD,HCTR1,UFL1,NFKBIA,PRKCB,BRD4,ARFGEF3,STAT1,NDFIP2,MAP2K6,DGKG,PARK7,ADCYAP1R1,EFHB,MEF2C,WNT7A,MAP3K5,NDFIP1,MAP3K4,S100B,C16ORF72,PDE2A,SDCBP,JPT2,NCK1,FGR,CDCA8,DNMBP,EPHA4,CYTH4,MECOM,NTRK2,PTK2,ANKRD6,ARHGAP12,APIP,UBE3A,SEMA4D,NENF,NOS1AP,TPTE,GPR55,TNFSF11,FYN,DOCK3,DOK5,APELA,ROR1,CDH2,RAD9A,PHLPP1,GPR137B,EPHB1,GRM5,RAI14,NRP1,PRKCA,ITGA1,RC3H1,BCR,FBLN1,BMPER,PRDM15,SRGAP3,EPHB2,MET,SPPL3,CDH13,MAGI2,PRDM11,KALRN,GNAS,MFHAS1,TIAM2,BMP7,DLG5,ZMYND11,PDGFC,ABL2,SLIT2,ERBB4,ROBO1,SIPA1L3,NLGN1,ARHGEF11,ESR1,MYO9B,IQCC-SCHIP1,AGO3,HTT,STARD13,EPS8,ROCK2,RORA,HERPUD1,BARD1,STK3,DEPTOR,IGF1R,AKAP13,DNM1L</p> |
| GO:0007264 | small GTPase mediated signal transduction | 5.990016607076961e-10 | <p>NOTCH2,BCAR3,GARNL3,MYO9A,KSR1,DLC1,RIPOR2,RDX,RALA,ARHGAP26,FGD4,CDC42EP3,AUTS2,ERBIN,RIN2,CRKL,ARHGAP24,DOCK10,DENND1A,DOCK2,SCAI,DGKI,PRKD1,CTNNA1,RALGPS1,RAPGEF2,RALGAPA1,RAPGEF5,DOCK8,MAPRE2,ARHGAP44,CD2AP,KANK1,MAP4K4,ITPKB,ARHGAP32,ARHGEF17,CHN1,RASGRF2,RGL1,TIAM1,ARHGEF12,USP8,MAPKAP1,DOCK4,ABL1,RAP1A,FGF10,NRG1,RASGRF1,DENND4C,TRIO,MCF2L,KNDC1,DOCK5,PLCE1,VAV1,IQSEC1,RALGAPA2,RELN,ARHGAP42,DOCK1,RAP1GAP,SRGAP2,PSD3,KITLG,DAB1,NGEF,ALS2,RACGAP1,DOCK9,VAV3,ARHGEF28,RALB,ROCK1,ARHGAP28,ARHGAP31,NTN1,ARFGEF1,SIH2,RALGPS2,RASGRP1,CSF1,RASGEF1C,PTH,RAB12,NET1,SIPA1L2,MADD,ARFGEF3,PARK7,ADCYAP1R1,RAPGEF4,RAB38,SDCBP,DNMBP,CYTH4,ARHGAP12,CYFIP1,RASGEF1B,CNKSR1,CCDC88A,GPR55,SH2D3C,DOCK3,NRP1,BCR,ELMO1,RERG,RRAS2,SRGAP3,EPHB2,MET,CDH13,KALRN,TIAM2,ABL2,SLIT2,ROBO1,SIPA1L3,ARHGEF11,MYO9B,STARD13,EPS8,ROCK2,AKAP13</p>                                                                                                                                                                                                                                                                                                                                                                                                                                                                                                                                                                                                                                                                                                                                                                                                                                                                                                                                                                             |
| GO:0048813 | dendrite morphogenesis                    | 6.092293932042417e-10 | <p>PTPRD,CHRNA7,DSCAM,TNIK,DOCK10,NEDD4,PHACTR1,RAPGEF2,ADGRB3,NEDD4L,DCLK1,STAU2,ARHGAP44,CTNNA2,PAK3,TRPC5,DNM3,DIP2A,HECW1,PAFAH1B1,ELAVL4,SDC2,CTNND2,KNDC1,PDLIM5,SEMA3A,RELN,RERE,MAP2,FARP1,NGEF,DPYSL5,TANC2,ACTR2,MAP6,CELSR2,ABI1,WNT7A,FBXW8,EPHA4,IL1RAPL1,FBXO31,UBE3A,SEMA4D,FYN,HECW2,EPHB1,NRP1,CUX1,EPHB2,PPF1A2,KALRN,NLGN1</p>                                                                                                                                                                                                                                                                                                                                                                                                                                                                                                                                                                                                                                                                                                                                                                                                                                                                                                                                                                                                                                                                                                                                                                                                                                                                                                                                                                                                                                                                                          |
| GO:0007417 | central nervous system development        | 6.486077425849245e-10 | <p>MTOR,CNTN4,SPOCK1,IMMP2L,TRAPPC9,PLCB1,TENM4,DLC1,IL1RAPL2,BCL2,ODAD2,ALDH1A2,ROBO2,ZEB1,RARB,NAV2,ALK,NEGR1,CNTNAP2,CRKL,SETD2,SLC4A10,EGFR,SOX6,ATP2B2,NTRK3,PHACTR1,GABRB1,CNTN6,SLC8A3,EPHA7,RAPGEF2,LRP2,ARSB,SSBP3,APP,DCLK1,SEMA5A,SYT1,SLC8A1,SRGAP2C,BMPR1B,CTNNA2,CHST8,SNHG2,KLHL1,MCPH1,ZSWIM6,MAPK1,ADAM22,NRG3,NIPBL,PAFAH1B1,NF2,CTNNA1,MEIS2,NFIB,SYN</p>                                                                                                                                                                                                                                                                                                                                                                                                                                                                                                                                                                                                                                                                                                                                                                                                                                                                                                                                                                                                                                                                                                                                                                                                                                                                                                                                                                                                                                                               |

|            |                                             |                       |                                                                                                                                                                                                                                                                                                                                                                                                                                                                                                                                                                                                                                                                                                                                                                                                                                                                                                                                                                                                                                                                                                                                                                                                                                                                                                                                                                                                                                                                                                                                                                                                                                                                                                                                                                                                                                                                                                                                                                |
|------------|---------------------------------------------|-----------------------|----------------------------------------------------------------------------------------------------------------------------------------------------------------------------------------------------------------------------------------------------------------------------------------------------------------------------------------------------------------------------------------------------------------------------------------------------------------------------------------------------------------------------------------------------------------------------------------------------------------------------------------------------------------------------------------------------------------------------------------------------------------------------------------------------------------------------------------------------------------------------------------------------------------------------------------------------------------------------------------------------------------------------------------------------------------------------------------------------------------------------------------------------------------------------------------------------------------------------------------------------------------------------------------------------------------------------------------------------------------------------------------------------------------------------------------------------------------------------------------------------------------------------------------------------------------------------------------------------------------------------------------------------------------------------------------------------------------------------------------------------------------------------------------------------------------------------------------------------------------------------------------------------------------------------------------------------------------|
|            |                                             |                       | <p>J1,TMEM108,JARID2,IL34,SYNE2,BBS2,WNT9B,SEMA6D,CDH11,MAPKAP1,TNR,ATRX,ELAVL4,ABL1,SLC1A1,DNAH5,FGF10,GRID2,NRG1,ASPM,ZBTB16,SH3GL3,EGF,TRIO,EXT1,RPS6KA3,PLXNA2,KDM7A,SEMA3E,HERC1,CDKN2C,KNDC1,MNAT1,BCL11B,MBP,AK8,CNTN1,BRCA2,DISC1,DNER,SEMA3A,BMP2,RELN,FGF9,TTC21B,B4GALT6,TSPAN2,SRGAP2,NIN,DRAXIN,GLI3,CASP5,RERE,MAP2,ATF2,BBS4,LAMC3,DCC,DAB1,PRKN,TBX20,GRIN2A,ATXN1,TOX,SHANK2,NPAS2,LYN,EIF2B3,ZFH3,HDAC11,PBX3,NDRG2,BMP5,KCNC1,GHRH,PRKG1,GRIN2B,SYNJ2,MED1,ATRN,IL33,ROR2,LMX1A,TACC2,ANP32B,NRXN1,CADM1,AKT3,CELSR2,ATP2B1,GAP43,EML1,PPP1R17,SHROOM2,SLC6A11,MTPN,POU6F2,POU1F1,FOXP2,CEP120,WNT7A,WASF3,S100B,EPHA4,GABRA5,NTRK2,NUMB,WNT2B,GRIK1,LAMB1,UBE3A,FAT4,FYN,ADGRL2,ARL13B,HYDIN,HDAC2,ATP5PF,UGP2,MDGA2,ROR1,ARNT2,CDH2,CNTN5,ITGA8,XRN2,EPHB1,PTPRG,NRP1,BCR,STK36,EPHB2,KALRN,SLC1A2,CA10,BMP7,DLG5,KIRREL3,BTD,BPTF,PDGFC,SLIT2,CCDC141,ERBB4,ROBO1,PBX1,CTTNBP2,SLC6A3,ASIC2,VCAN,KDM4B,FOXB1,MACROD2,RORA,ATAT1,HSFG2,NCOA6,RGS7,HOKK3,STK3,ZNF423,IGF1R,GLI2</p>                                                                                                                                                                                                                                                                                                                                                                                                                                                                                                                                                                                                                                                                                                                                                                                                                                                                                                                                                        |
| GO:0050803 | regulation of synapse structure or activity | 6.94948055052153e-10  | <p>PTPRD,IL1RAPL2,LRFN2,CDH8,ROBO2,NEGR1,GPC6,NEDD4,NTRK3,EPHA7,ADGRB3,APP,STAU2,ARHGAP44,CTNNA2,PAK3,DNM3,PAFAH1B1,TANC1,ABL1,LRFN5,GRID2,MUSK,DGKB,PTPRO,ABHD17C,LINGO2,PDLIM5,DISC1,RELN,FARP1,NGEF,FRMPD4,SHANK2,NTN1,COLQ,TANC2,GRIN2B,IL10,ACTR2,CLSTN2,NRXN1,NEDD9,MEF2C,ADGRB1,WNT7A,NECTIN1,EPHA4,NTRK2,IL1RAPL1,CYFIP1,UBE3A,PCDH8,SEMA4D,FYN,ADGRL2,CDH2,EPHB1,EPHB2,PPFIA2,FLRT2,KALRN,DLG5,SYNDIG1,NLGN1,CTTNBP2,ASIC2,EFNA5,C1QL3</p>                                                                                                                                                                                                                                                                                                                                                                                                                                                                                                                                                                                                                                                                                                                                                                                                                                                                                                                                                                                                                                                                                                                                                                                                                                                                                                                                                                                                                                                                                                            |
| GO:0007166 | cell surface receptor signaling pathway     | 8.575824079632514e-10 | <p>NOTCH2,BCAR3,PTPRD,ANKS1B,NLK,PLCB1,PTPRA,PDE4D,IL1RAPL2,BCL2,PRDM16,FBN1,CHRNA7,ROBO2,RIMS1,ZEB1,SPRED1,MYO1E,RIMS2,ALK,ADGRE1,ERBIN,ANO6,MLLT3,GPC6,APC,HHLA2,DSCAM,CRKL,TNFK,PTPRJ,EGFR,ANGPT1,MACF1,PRKACB,RNF220,NEDD4,MAML2,GRIK3,CHSY1,NTRK3,C5,DKK2,FLT1,DGKI,INVS,GRIA1,NEO1,CNTN6,SLC8A3,PRKD1,PAK1,GMDS,EPHA7,SPEN,RAPGEF2,PELI2,LRP2,ADGRB3,RUNX2,FGF12,ONECUT1,CPEB4,PRICKLE2,BTBD11,GRM7,GHR,COL4A2,TRPM1,ADAM10,IL1R1,APP,USP18,SEMA5A,NTF3,ST18,PYGO1,PTPRR,KANK1,BMPR1B,PCSK6,HOMER2,ARNT,PAK3,RFTN1,ITPKB,HHAT,IFT57,PRKCZ,BTLA,GRB10,HECW1,DUSP22,YAP1,PPM1L,SHC4,MAPK1,MGAT5,PDGFD,ZNRF3,ITGBL1,NRG3,UBE2O,NCAM1,GFRA1,CHN1,GLP2R,PAFAH1B1,EFEMP1,ITGB8,NF2,GRIK4,HIVEP1,CTNNA1,BIRC6,KLF15,PPARA,ADAMTS3,TIAM1,GRM1,PTPRK,PAK5,PCDH11Y,SEMA3C,DAPK1,TMEM108,MAGI1,ALPK2,CPE,EVC2,IL34,ADGRV1,BBS2,WNT9B,SEMA6D,SMARCA4,USP8,PIAS1,SPG21,BLK,GRM8,DST,MBD5,PTPRT,ABL1,PTPN12,SLC1A1,PRKAA1,GAS2,RAP1A,GPC5,FGF10,GRID2,LATS2,NRG1,ASPM,MUSK,ZNF675,PRKCE,NXN,WNK2,FBN2,CD44,PTPRO,EGF,P2RX6,TRIO,EXT1,LNPEP,LIMD1,SPRED2,CTNND2,PTPN2,TRIM5,PLXNA2,ARHGEF7,LTBP1,ZFYVE9,OPRM1,FANCA,KREMEN1,SEMA3E,MARK2,GCSAML,ADGRA3,EPHA6,EPN2,EVC,MOSMO,GFRA2,MDFIC,ADAM12,CCND3,ECE1,PLCE1,TGFA,IL17RA,HIP1,CRIM1,VAV1,LDLRAD4,NPHP4,CNTN1,SNX3,DISC1,DNER,WDPCP,SEMA3A,STRN,BMP2,RC3H2,UNC5D,PSG9,SOGA1,RANBP9,BMP2K,SEMA3D,CABIN1,LEMD3,RELN,GNAQ,FGF9,NFATC2,ZNF106,TRAF3,UNC13B,TTC21B,DSTYK,DOCK1,DRAXIN,SLAMF1,FAM83B,GLI3,SMARCC1,SNX6,SMOC2,GRIK2,IDE,WDR12,GAREM1,LAMC1,ATF2,CYLD,BBS4,MX1,ITGA9,KPNA1,UBASH3A,RGMB,NEU3,KITLG,DCC,SLC30A10,DAB1,RB1CC1,PTPRE,PRKN,MTMR2,TBX20,MAPK10,NGEF,GRIN2A,ARID5B,PRKCH,IL6R,NLRC5,SNX25,VAV3,MESD,SOX30,ARHGEF28,ADGRG6,LYN,SEL1L,EIF2B3,DTX1,OVOL2,ZBTB33,INSR,CUL5,YTHDF3,DEDD2,GRID1,SNAIL2,IGHV3-74,BID,SLAH2,TRABD2B,PLPP4,NREP,ZDHHHC17,JCAD,SAMHD1,IFT81,ENPP1,IGSF11,NDRG2,CSNK2A1,BMP5,CSF1,GHRH,BCL2L1,LAMA3,GRIN2B,GRB14,IGHV2-70D,SMAD5,CELF4,TNN,MED1,IL33,ROR2,KL,BANK1,IL10,SO</p> |

|            |                                                 |                       |                                                                                                                                                                                                                                                                                                                                                                                                                                                                                                                                                                                                                                                                                                                                                                                                                                                                                                                                                                                                                                                                                                                                                                                                                                                                                                                                                                                                                                                                                                                                                                                                                                                                                                                                                                                                                                                                                                                                                                                                                                                                                                                                                                                                                                                                                                                                                                                                                                                                                                                                                                                                                                                                                                                         |
|------------|-------------------------------------------------|-----------------------|-------------------------------------------------------------------------------------------------------------------------------------------------------------------------------------------------------------------------------------------------------------------------------------------------------------------------------------------------------------------------------------------------------------------------------------------------------------------------------------------------------------------------------------------------------------------------------------------------------------------------------------------------------------------------------------------------------------------------------------------------------------------------------------------------------------------------------------------------------------------------------------------------------------------------------------------------------------------------------------------------------------------------------------------------------------------------------------------------------------------------------------------------------------------------------------------------------------------------------------------------------------------------------------------------------------------------------------------------------------------------------------------------------------------------------------------------------------------------------------------------------------------------------------------------------------------------------------------------------------------------------------------------------------------------------------------------------------------------------------------------------------------------------------------------------------------------------------------------------------------------------------------------------------------------------------------------------------------------------------------------------------------------------------------------------------------------------------------------------------------------------------------------------------------------------------------------------------------------------------------------------------------------------------------------------------------------------------------------------------------------------------------------------------------------------------------------------------------------------------------------------------------------------------------------------------------------------------------------------------------------------------------------------------------------------------------------------------------------|
|            |                                                 |                       | <p>STDC1, PRKAA2, CSF2RB, ITPRIP, IQGAP1, RPS12, CAMLG, SREBF2, FYB2, NRXN1, HIPK1, CD70, CIBAR1, PBLD, PEG10, JAK2, FSTL1, SVEP1, MADD, CELSR2, CREBBP, TNKS, GORAB, NFKBIA, PRKCB, ANXA4, ZC3H15, NEDD9, ITGA6, IGHV10R15-9, ADGRE3, OTOF1, CIDEA, GID8, STAT1, BRMS1L, ABI1, CCBE1, PANK7, ADAMTS18, MAPK8, ITGA4, FBXL17, ADCYAP1R1, MYOCD, CYFIP2, MEF2C, ADGRB1, WNT7A, RBPM2, ATP6V1C2, SDCBP, SPPL2B, WWOX, NCK1, FGR, PPP2R3A, CXCL2, IFNAR1, EPHA4, NTRK2, WNT2B, POSTN, CD101, SHISA6, IL17RD, GRIK1, MVB12B, PTK2, CDH5, ANKRD6, NFKBID, CLDN18, LAMB1, CYFIP1, SEMA4D, FAT4, WNT5B, AMFR, FCRLA, SORBS2, CNKSR1, CCDC88A, TNFSF11, FYN, ADGRL2, ARL13B, RBMS3, HDAC2, DOK5, ZFYVE28, MAPK9, ROR1, FUT8, TET1, CDH2, ITGA8, EPHB1, GRM5, RPS6KA5, PTPRG, P1D1, NRP1, PRKCA, FAIM, SAMD12, ITGA1, RNF138, RC3H1, POR, MCC, KIF16B, ELP2, STK36, B9D1, BMPER, PRDM15, MITF, EPHB2, CSNK1G1, CD38, EYA4, CDK14, MET, SPPL3, CDH17, CDH13, STXBP4, MAGI2, FLRT2, KALRN, LAMA1, BMP7, DLG5, ZMYND11, TMEM25, GRM3, ADGRF5, PDGFC, EYA1, SLIT2, CNOT7, ERBB4, IL20RB, ROBO1, PRKCQ, NLGN1, EFNA5, SLIT3, MYO9B, IGLC3, ADGRG7, PRLR, HTT, PIK3R3, FER, EYA2, CCR2, SEMA4B, IGHV10R21-1, GRIA4, RORA, DMRT1, COL4A3, KIF7, FSTL4, STK3, DEPTOR, ZNF423, APCDD1, IGF1R, GLI2</p>                                                                                                                                                                                                                                                                                                                                                                                                                                                                                                                                                                                                                                                                                                                                                                                                                                                                                                                                                                                                                                                                                                                                                                                                                                                                                                                                                                                                                                    |
| GO:0006796 | phosphate-containing compound metabolic process | 9.108933562388092e-10 | <p>BCAR3, MTOR, PTPRD, ULK2, NLK, KSR1, PLCB1, LIPI, DLC1, PTPRA, PDE4D, ERC1, NME7, SLC44A5, BCL2, LPCAT2, GPHN, CHRNA7, PUDP, PIK3C3, SPRED1, PLPPR1, ALK, HACD2, GLYAT, MAP3K9, MYO3B, MOCOS, APC, PLPPR5, DSCAM, CRKL, ERG, TNIK, PTPRJ, NEK4, EGFR, ANGPT1, CDK12, PRKACB, NEK7, NCOR1, GNPTAB, SGMS1, RPRD1A, PTPN4, NTRK3, FLT1, GK, DGKI, SLC8A3, PRKD1, TPTE2, PAK1, EPHA7, ADSS2, RAPGEF2, PELI2, CPS1, TAOK3, TMEM38B, AGK, SLC44A1, LDB2, PPP2R2B, PTPRN2, SMYD3, LRIG1, RPTOR, GHR, ADAM10, APP, ADK, RPS6KA2, SAMS1, KYN, PHKB, DCLK1, NTF3, AURKA, SLC8A1, PTPRR, FIG4, UPP2, MAP4K4, BMPR1B, ARNT, PAK3, RANBP2, ITPKB, TRPC5, PDE10A, NBN, SCP2, PRKCZ, GRB10, DIP2A, MCPH1, TAF4B, DUSP22, PPM1L, RIPK4, MAPK1, MGAT5, PDGFD, NRG3, GFRA1, PI4K2B, RRGTT, MTMR10, STK38, PTPN13, MYLK3, ACSBG1, LIMCH1, PAFAH1B1, EFEMP1, DCAF1, CCNG2, TLK1, NF2, MOB3B, BIRC6, AKAP9, PPARA, PPIP5K1, LCLAT1, PPP6R3, SYNJ1, RSR1, PTPRK, PAK5, PPP2R5E, DAPK1, FAR2, ACSM2B, STK32B, ALPK2, IL34, MELK, WNT9B, CLPX, DUSP16, PARD3, MAPKAP1, BLK, OLA1, NUA1, PTPRT, ABL1, PTPN12, HDAC4, SLC1A1, PRKAA1, MAST4, GUCY1A2, RAP1A, CAMK4, INPP5A, FGF10, PEAK1, LATS2, NRG1, MUSK, ZNF675, PRKCE, FOXK2, SLC3A1, WNK2, DGKB, CD44, PTPRO, EGF, ALPK3, PRRC1, TRIO, LIMD1, SPRED2, RPS6KA3, MTMR3, PTPN2, HTR2C, AMBRA1, STK38L, HTR2A, INPP4B, PPP2R2C, TAF3, RPRD1B, MARK2, GMPR, ALPL, EPHA6, SH3KBP1, HIPK3, CDKN2C, GRK3, KNDC1, CLSPN, NOS2, STK10, TTC7B, MNAT1, MYLK2, HMG2, CCND3, STK32A, AK8, PLCE1, TGFA, PRR5L, EFR3A, LDLRAD4, CNTN1, CEPT1, BLM, NRK, MAGI3, ADCY10, BMP2, MYLK4, CDC42BPB, VRK1, BMP2K, RELN, GNAQ, CDS2, FGF9, SH3BP5, DSTYK, PFKFB4, SNX6, CNKSR3, NEK10, MOB1B, PIGN, ATF2, MAPK8IP1, ME2, KITLG, CAMTA1, SMPDL3A, CHRM5, MAP4K3, RCAN1, TADA2A, DAB1, RB1CC1, MYO3A, AKAP10, PTPRE, PRKN, MTMR2, CDC42BPA, MAPK10, PNPLA7, TRPM6, PRKCH, HUNK, IL6R, ALS2, NLRC5, MGKN1, SNX25, SLC4A4, PTPRB, COPS8, VAV3, ENPP3, HAAO, MOK, RALB, PPA2, FAR1, ROCK1, LYN, SLC44A2, CHKA, INSR, NEK6, DPYD, PIGK, OSBPL10, PGAP4, ERN2, PLPP4, CARD10, SAMHD1, ENPP1, ENTPD5, MOCS2, RASGRP1, SNX9, TMEM225, UCK2, CSNK2A1, BMP5, CSF1, CTDPI, PRKG1, SMAD5, SYNJ2, HADHA, LPGAT1, CDC14B, GPRC5C, ROR2, PPP2R2A, BANK1, RIOK1, HDHD5, PTH, PRKAA2, CSF2RB, PLA2G4A, IQGAP1, THNSL2, NRXN1, HIPK1, DGKK, CENPE, AKT3, ALKAL2, JAK2, MPPE1, BPNT1, MADD, TNKS, PRKCB, RTRAF, BRD4, SMPD4, NEDD9, NRBP1, ITGA6, ADCY9, PPP1R17, MAST2, ZBTB49, FRA10AC1, PDP2, MAP2K6, DGKG, ABI1, CEMIP, IMPACT, PARK7, MAPK8, PME1, ADCYAP1R1, PLA2G12B, NCAPG2, MYOCD, DHTKD1, ACACA, NDUFA10, MEF2C, MAP3K5, MAP3K4, PKN2, PDE2A, RAB38, DBF4B, SDCBP, PASK, MLLT1, NCK1, FGR, CDCA8, PPP2R3A, ATP6V1B2, T</p> |

|            |                              |                      |                                                                                                                                                                                                                                                                                                                                                                                                                                                                                                                                                                                                                                                                                                                                                                                                                                                                                                                                                                                                                                                                                                                                                                                                                                                                                                                                                                                                                                                                                                                                                                                                                                                                                                                                                                                                                                                                                                                                                                                                                                                                                                                                                                                                                                                                                                                                                                                                                                                                                                                                                                                                                                                                                                                                                                      |
|------------|------------------------------|----------------------|----------------------------------------------------------------------------------------------------------------------------------------------------------------------------------------------------------------------------------------------------------------------------------------------------------------------------------------------------------------------------------------------------------------------------------------------------------------------------------------------------------------------------------------------------------------------------------------------------------------------------------------------------------------------------------------------------------------------------------------------------------------------------------------------------------------------------------------------------------------------------------------------------------------------------------------------------------------------------------------------------------------------------------------------------------------------------------------------------------------------------------------------------------------------------------------------------------------------------------------------------------------------------------------------------------------------------------------------------------------------------------------------------------------------------------------------------------------------------------------------------------------------------------------------------------------------------------------------------------------------------------------------------------------------------------------------------------------------------------------------------------------------------------------------------------------------------------------------------------------------------------------------------------------------------------------------------------------------------------------------------------------------------------------------------------------------------------------------------------------------------------------------------------------------------------------------------------------------------------------------------------------------------------------------------------------------------------------------------------------------------------------------------------------------------------------------------------------------------------------------------------------------------------------------------------------------------------------------------------------------------------------------------------------------------------------------------------------------------------------------------------------------|
|            |                              |                      | <p>OP1,EPHA4,PPIP5K2,NTRK2,ACSM2A,OCNLN,TRPM7,PRKAB1,PTK2,MARK4,CDH5,SEMA4D,ZBTB20,IMPA2,KIRREL1,SLC26A2,TPTTE,PDCL3,CNKSR1,CCDC88A,HKDC1,TNFSF11,FYN,BUB1,PPM1F,HDAC2,SACM1L,SH2D3C,DOCK3,NCS1,ATP5PF,UGP2,MTMR7,ZFYVE28,MAPK9,ROR1,EPHB1,GRM5,ADCK1,RPS6KA5,PTPRG,PID1,NRP1,PRKCA,ATPCKMT,FHIT,ITGA1,CROT,EFL1,BCR,SNRK,FBLN1,STK36,BMPER,MACROH2A1,EPHB2,CSNK1G1,CD38,CDK14,MET,SPPL3,DLG2,CAMK1G,MAGI2,KALRN,LAMA1,MFHAS1,BMP7,BTBD10,AK3,ADGRF5,PDGFC,ELOVL7,ABL2,EYA1,SLIT2,CMPK1,CNOT7,FAM126A,ERBB4,FAM126B,ROBO1,PRKCQ,AK9,NOS1,EFNA5,NSD1,PRLR,PIGB,HTT,CAMK1D,PIK3R3,AK2,FER,EYA2,PITPNM3,OSBPL5,FGGY,HRH1,ROCK2,RORA,PPP1CB,PK1,PTPRQ,WASHC1,BARD1,PNPLA3,STK3,DEPTOR,PNPLA8,HNRNPU,IGF1R,PRKAG2,AKAP13,MORC3,DNM1L</p>                                                                                                                                                                                                                                                                                                                                                                                                                                                                                                                                                                                                                                                                                                                                                                                                                                                                                                                                                                                                                                                                                                                                                                                                                                                                                                                                                                                                                                                                                                                                                                                                                                                                                                                                                                                                                                                                                                                                                                                                                                  |
| GO:0006793 | phosphorus metabolic process | 1.688017325227711e-9 | <p>BCAR3,MTOR,PTPRD,ULK2,NLK,KSR1,PLCB1,LIP1,DLC1,PTPRA,PDE4D,ERC1,NME7,SLC44A5,BCL2,LPCAT2,GPHN,CHRNA7,PUDP,PIK3C3,SPRED1,PLPPR1,ALK,HACD2,GLYAT,MAP3K9,MYO3B,MOCOS,APC,PLPPR5,DSCAM,CRKL,ERG,TN1K,PTPRJ,NEK4,EGFR,ANGPT1,CDK12,PRKACB,NEK7,NCOR1,GNPTAB,SGMS1,RPRD1A,PTPN4,NTRK3,FLT1,GK,DGKI,SLC8A3,PRKD1,TPTTE2,PAK1,GMDS,EPHA7,ADSS2,RAPGEF2,PELI2,CPS1,TAOK3,TMEM38B,AGK,SLC44A1,LDB2,PPP2R2B,PTPRN2,SMYD3,LRGUK,RPTOR,GHR,ADAM10,APP,ADK,RPS6KA2,SAMSN1,KYNU,PHKB,DCLK1,NTF3,AURKA,SLC8A1,PTPRR,FIG4,UPP2,MAP4K4,BMPR1B,ARNT,PAK3,RANBP2,ITPKB,TRPC5,PDE10A,NBN,SCP2,PRKCZ,GRB10,DIP2A,MCPH1,TAF4B,DUSP22,PPM1L,RIPK4,MAPK1,MGAT5,PDGFD,NRG3,GFRA1,PI4K2B,RNGTT,MTMR10,STK38,PTPN13,MYLK3,ACSBG1,LIMCH1,PAFAH1B1,EFEMP1,DCAF1,CCNG2,TLK1,NF2,MOB3B,BIRC6,AKAP9,PPARA,PPIP5K1,LCLAT1,PPP6R3,SYNJ1,RSRC1,PTPRK,PAK5,PPP2R5E,DAPK1,FAR2,ACSM2B,STK32B,ALPK2,IL34,MELK,WNT9B,CLPX,DUSP16,PARD3,MAPKAP1,BLK,OLA1,NUAK1,PTPRT,ABL1,PTPN12,HDAC4,SLC1A1,PRKAA1,MAST4,GUCY1A2,RAP1A,CAMK4,INPP5A,FGF10,PEAK1,LATS2,NRG1,MUSK,ZNF675,PRKCE,FOXK2,SLC3A1,WNK2,DGKB,CD44,PTPRO,EGF,ALPK3,PRRC1,TRIO,LIMD1,SPRED2,RPS6KA3,MTMR3,PTPN2,HTR2C,AMBRA1,STK38L,HTR2A,INPP4B,PPP2R2C,TAF3,RPRD1B,MARK2,GMPPR,ALPL,EPHA6,SH3KBP1,HIPK3,CDKN2C,GRK3,KNDC1,CLSPN,NOS2,STK10,TTC7B,MNAT1,MYLK2,HMGA2,CCND3,STK32A,AK8,PLCE1,TGFA,PRR5L,EFR3A,LDLRAD4,CNTN1,CEPT1,BLM,NRK,MAGI3,ADCY10,BMP2,MYLK4,CDC42BPB,VRK1,BMP2K,RELN,GNAQ,CDS2,FGF9,SH3BP5,DSTYK,PFKFB4,SNX6,CNKSR3,NEK10,MOB1B,PTGN,ATF2,MAPK8IP1,ME2,KITLG,CAMTA1,SMPDL3A,CHRM5,MAP4K3,RCAN1,TADA2A,DAB1,RB1CC1,MYO3A,AKAP10,PTPRE,PRKN,MTMR2,CDC42BPA,MAPK10,PNPLA7,TRPM6,PRKCH,HUNK,IL6R,ALS2,NLRC5,MKNK1,SNX25,SLC4A4,PTPRB,COPS8,VAV3,ENPP3,HAO,MOK,RALB,PPA2,FAR1,ROCK1,LYN,SLC44A2,CHKA,INSR,NEK6,DYPD,PIGK,OSBPL10,PGAP4,ERN2,PLPP4,CARD10,SAMHD1,ENPP1,ENTPD5,MOCOS,RASGRP1,SNX9,TMEM225,UCK2,CSNK2A1,BMP5,CSF1,CTDP1,PRKG1,SMAD5,SYNJ2,HADHA,LPGAT1,CDC14B,GPRC5C,ROR2,PPP2R2A,BANK1,RIOK1,HDHD5,PTH,PRKAA2,CSF2RB,PLA2G4A,IQGAP1,THNSL2,NRXN1,HIPK1,DGKB,CENPE,AKT3,ALKAL2,JAK2,MPPE1,BPNT1,MADD,TNKS,PRKCB,RTRAF,BRD4,SMPD4,NEDD9,NRBP1,ITGA6,ADCY9,PPP1R17,MAST2,ZBTB49,FRA10AC1,PDP2,MAP2K6,DGKG,ABI1,CEMIP,IMPACT,PARK7,MAPK8,PPME1,ADCYAP1R1,PLA2G12B,NCAPG2,MYOCD,DHTKD1,ACACA,NDUFA10,MEF2C,MAP3K5,MAP3K4,PKN2,PDE2A,RAB38,DBF4B,SDCBP,PASK,MLLT1,NCK1,FGR,CDCA8,PPP2R3A,ATP6V1B2,TOPI,EPHA4,PPIP5K2,NTRK2,ACSM2A,OCNLN,TRPM7,PRKAB1,PTK2,MARK4,CDH5,SEMA4D,ZBTB20,IMPA2,KIRREL1,SLC26A2,TPTTE,PDCL3,CNKSR1,CCDC88A,HKDC1,TNFSF11,FYN,BUB1,PPM1F,HDAC2,SACM1L,SH2D3C,DOCK3,NCS1,ATP5PF,UGP2,MTMR7,ZFYVE28,MAPK9,ROR1,FUT8,EPHB1,GRM5,ADCK1,RPS6KA5,PTPRG,PID1,NRP1,PRKCA,ATPCKMT,FHIT,ITGA1,CROT,EFL1,BCR,SNRK,FBLN1,STK36,BMPER,MACROH2A1,EPHB2,CSNK1G1,CD38,CDK14,MET,SPPL3,DLG2,CAMK1G,MAGI2,KALRN,L</p> |

|            |                        |                       |                                                                                                                                                                                                                                                                                                                                                                                                                                                                                                                                                                                                                                                                                                                                                                                                                                                                                                                                                                                                                                                                                                                                                                                                                                                                                                                                                                                                                                                                                                                                                                                                                                                                                                                                                                                                                                                                                                                                                                                                                                                                                                                   |
|------------|------------------------|-----------------------|-------------------------------------------------------------------------------------------------------------------------------------------------------------------------------------------------------------------------------------------------------------------------------------------------------------------------------------------------------------------------------------------------------------------------------------------------------------------------------------------------------------------------------------------------------------------------------------------------------------------------------------------------------------------------------------------------------------------------------------------------------------------------------------------------------------------------------------------------------------------------------------------------------------------------------------------------------------------------------------------------------------------------------------------------------------------------------------------------------------------------------------------------------------------------------------------------------------------------------------------------------------------------------------------------------------------------------------------------------------------------------------------------------------------------------------------------------------------------------------------------------------------------------------------------------------------------------------------------------------------------------------------------------------------------------------------------------------------------------------------------------------------------------------------------------------------------------------------------------------------------------------------------------------------------------------------------------------------------------------------------------------------------------------------------------------------------------------------------------------------|
|            |                        |                       | <p>AMA1,MFHAS1,BMP7,BTBD10,AK3,ADGRF5,PDGFC,ELOVL7,ABL2,EYA1,SLIT2,CMPK1,CNOT7,FAM126A,ERBB4,FAM126B,ROBO1,PRKCQ,AK9,NOS1,EFNA5,NSD1,PRLR,PIGB,HTT,CAMK1D,PIK3R3,AK2,FER,EYA2,PITPNM3,OSBPL5,FGGY,HRH1,ROCK2,RORA,PPP1CB,PDK1,PTPRQ,WASHC1,BARD1,PNPLA3,STK3,DEPTOR,PNPLA8,HNRNPU,IGF1R,PRKAG2,AKAP13,MORC3,DNM1L</p>                                                                                                                                                                                                                                                                                                                                                                                                                                                                                                                                                                                                                                                                                                                                                                                                                                                                                                                                                                                                                                                                                                                                                                                                                                                                                                                                                                                                                                                                                                                                                                                                                                                                                                                                                                                             |
| GO:0016310 | phosphorylation        | 1.9068547110251563e-9 | <p>BCAR3,MTOR,ULK2,NLK,KSR1,PTPRA,PDE4D,ERC1,NME7,BCL2,CHRNA7,PIK3C3,SPRED1,ALK,MAP3K9,MYO3B,APC,DSCAM,CKL,ERG,TNIK,PTPRJ,NEK4,EGFR,ANGPT1,CDK12,PRKACB,NEK7,NCOR1,GNPTAB,SGMS1,PTPN4,NTRK3,FLT1,GK,DGKI,SLC8A3,PRKD1,PAK1,EPHA7,RAPGEF2,PELI2,TAOK3,AGK,LDB2,SMYD3,LRGUK,RPTOR,GHR,ADAM10,APP,ADK,RPS6KA2,SAMSN1,PHKB,DCLK1,NTF3,AURKA,SLC8A1,MAP4K4,BMPR1B,ARNT,PAK3,RANBP2,ITPKB,TRPC5,NBN,PRKCZ,GRB10,MCPH1,TAF4B,DUSP22,RIPK4,MAPK1,PDGFD,NRG3,GFRA1,PI4K2B,STK38,PTPN13,MYLK3,LIMCH1,EFEMP1,DCAF1,CCNG2,TLK1,NF2,MOB3B,BIRC6,AKAP9,PPARA,PIIP5K1,RSRC1,PAK5,DAPK1,STK32B,ALPK2,IL34,MELK,WNT9B,DUSP16,PARD3,MAPKAP1,BLK,NUAK1,PTPRT,ABL1,HDAC4,SLC1A1,PRKAA1,MAST4,RAP1A,CAMK4,FGF10,PEAK1,LATS2,NRG1,MUSK,ZNF675,PRKCE,FOXK2,SLCO3A1,WNK2,DGKB,CD44,PTPRO,EGF,ALPK3,PRRC1,TRIO,LIMD1,SPRED2,RPS6KA3,PTPN2,AMBRA1,STK38L,HTR2A,TAF3,MARK2,EPHA6,SH3KBP1,HIPK3,CDKN2C,GRK3,KNDC1,CLSPN,STK10,MNAT1,MYLK2,HMGA2,CCND3,STK32A,AK8,PLCE1,TGFA,PRR5L,LDLRAD4,CNTN1,BLM,NRK,BMP2,MYLK4,CDC42BPB,VRK1,BMP2K,RELN,GNAQ,FGF9,SH3BP5,DSTYK,PFKFB4,SNX6,CNKSR3,NEK10,MOB1B,ATF2,MAPK8IP1,KITLG,MAP4K3,TADA2A,DAB1,RB1CC1,MYO3A,AKAP10,PRKN,CDC42BPA,MAPK10,TRPM6,PRKCH,HUNK,IL6R,ALS2,NLRC5,MKNK1,SNX25,SLC4A4,PTPRB,COPS8,VAV3,MOK,RALB,ROCK1,LYN,CHKA,INSR,NEK6,ERN2,CARD10,ENPP1,RASGRP1,SNX9,UCK2,CSNK2A1,BMP5,CSF1,PRKG1,SMAD5,GPRC5C,ROR2,BANK1,RIOK1,PRKAA2,CSF2RB,IQGAP1,NRXN1,HIPK1,DGKK,CENPE,AKT3,ALKAL2,JAK2,MADD,TNKS,PRKCB,RTRAF,BRD4,NEDD9,NRBP1,ITGA6,MAST2,MAP2K6,DGKG,ABI1,CEMIP,IMPACT,PARK7,MAPK8,PPME1,NCAPG2,MYOCD,DHTKD1,MEF2C,MAP3K5,MAP3K4,PKN2,DBF4B,SDCBP,PASK,MLLT1,NCK1,FGR,CDCA8,TOP1,EPHA4,PIIP5K2,NTRK2,OCLN,TRPM7,PRKAB1,PTK2,MARK4,CDH5,SEMA4D,ZBTB20,KIRREL1,PDCL3,CNKSR1,CCDC88A,HKDC1,TNFSF11,FYN,BUB1,PPM1F,HDAC2,SH2D3C,DOCK3,ZFYVE28,MAPK9,ROR1,EPHB1,GRM5,ADCK1,RPS6KA5,PID1,NRP1,PRKCA,BCR,SNRK,FBLN1,STK36,BMPER,MACROH2A1,EPHB2,CSNK1G1,CDK14,MET,CAMK1G,MAGI2,KALRN,LAMA1,BMP7,BTBD10,AK3,PDGFC,ABL2,SLIT2,CMPK1,CNOT7,ERBB4,ROBO1,PRKCQ,AK9,NOS1,EFNA5,NSD1,PRLR,HTT,CAMK1D,PIK3R3,AK2,FER,FGGY,ROCK2,PDK1,WASHC1,BARD1,STK3,DEPTOR,HNRNPU,IGF1R,PRKAG2,AKAP13,MORC3</p> |
| GO:0006996 | organelle organization | 2.1911180524808768e-9 | <p>NOTCH2,MTOR,IMMP2L,PTPRD,TRAPPC9,NEBL,ULK2,LONP2,UNC13C,LRRRC49,PLCB1,SVIL,TLN2,MICAL3,NUBPL,DLC1,RIPOR2,RDX,RP1,STXBP1,RALA,BCL2,MYO5A,ODAD2,ARHGAP26,COG5,PIK3C3,SPIRE1,CNTLN,SDCCAG8,FGD4,NAV2,SPAG16,MYO1E,TRAPPC8,CEP192,CDC42EP3,MICOS10,AUTS2,FOXJ2,CARMIL1,ERBIN,RHPN2,PARVB,MAP4,APC,ZMYM4,MYO5C,SETD2,TNINK,RFX3,MACF1,CTNNA3,NEK7,NCOR1,DOCK2,DIAPH3,GNPTAB,NSMCE2,CECR2,ARMC2,NTRK3,ZFAND6,PHACTR1,DNAJC13,RFC3,PSMA8,CRACD,SLC39A12,TOM1L2,PRKD1,PAK1,DEUP1,ARSB,ONECUT1,TMEM38B,AGK,UBE2L3,LRGUK,SEPTIN9,RETREG1,EPB41L3,KIF4A,TBCD,ATF7IP,PHACTR2,RPS6KA2,DCLK1,STAUP2,MAPRE2,SEMA5A,SYT1,ARHGAP44,NTF3,NDUFAF2,CD2AP,AURKA,PARN,TTC29,PYGO1,SRGAP2C,ANKRD31,FIG4,FRMD3,CCSER2,KANK1,ABCD2,FMN2,THSD7A,CTNNA2,RAB8B,PAK3,TLL7,RAP1GDS1,NBN,IFT57,PRKCZ,CALD1,KLHL1,MCPH1,MRTFA,COBL,SENP6,YAP1,MAPK1,ABCD3,ABLIM1,ARHGEF17,ANKFY1,SYCP1,NIPBL,SLC16A1,PI4K2B,CORO2B,CHD6,MYLK3,LIMCH1,FMN1,PAFAH1B1,VPS13D,TPM1,NF2,CTNNA1,PPP1R9A,AKAP9,SNX30,SYNJ1,MPRIIP,FOXJ3,ENAH,PAK5,PARD3B,NAV3,VPS13C,TMEM108,RAB22A,DNAJC15,DYSF,ANK2,STAG2,BRWD1,BCAS</p>                                                                                                                                                                                                                                                                                                                                                                                                                                                                                                                                                                                                                                                                                                                                                                                                                                                                                                                                                                                                                                            |

|            |                                 |                      |                                                                                                                                                                                                                                                                                                                                                                                                                                                                                                                                                                                                                                                                                                                                                                                                                                                                                                                                                                                                                                                                                                                                                                                                                                                                                                                                                                                                                                                                                                                                                                                                                                                                                                                                                                                                                                                                                                                                                                                                                                                                                                                                                                                                                                                                                                                                                                                                                                                                                                                                                                                                                                                                                                                                                                                                                                                                                                                                                                                                                                                                                                                                                                                                                                                        |
|------------|---------------------------------|----------------------|--------------------------------------------------------------------------------------------------------------------------------------------------------------------------------------------------------------------------------------------------------------------------------------------------------------------------------------------------------------------------------------------------------------------------------------------------------------------------------------------------------------------------------------------------------------------------------------------------------------------------------------------------------------------------------------------------------------------------------------------------------------------------------------------------------------------------------------------------------------------------------------------------------------------------------------------------------------------------------------------------------------------------------------------------------------------------------------------------------------------------------------------------------------------------------------------------------------------------------------------------------------------------------------------------------------------------------------------------------------------------------------------------------------------------------------------------------------------------------------------------------------------------------------------------------------------------------------------------------------------------------------------------------------------------------------------------------------------------------------------------------------------------------------------------------------------------------------------------------------------------------------------------------------------------------------------------------------------------------------------------------------------------------------------------------------------------------------------------------------------------------------------------------------------------------------------------------------------------------------------------------------------------------------------------------------------------------------------------------------------------------------------------------------------------------------------------------------------------------------------------------------------------------------------------------------------------------------------------------------------------------------------------------------------------------------------------------------------------------------------------------------------------------------------------------------------------------------------------------------------------------------------------------------------------------------------------------------------------------------------------------------------------------------------------------------------------------------------------------------------------------------------------------------------------------------------------------------------------------------------------------|
|            |                                 |                      | <p>3, SYNE2, BBS2, AIF1L, SHOC1, SMARCA4, USP8, LDB3, PARD3, MAPKAP1, DST, CXADR, ATRX, XIRP2, ABL1, PRKAA1, GAS2, ITGB3BP, TTLL5, MAST4, DNAH5, BAZ2A, FGF10, UQCC1, GRID2, INO80D, CLIP1, ASPM, AP3B1, SYNE1, SMARCA4, SETDB2, PRKCE, PGM5, USP33, CEP83, EGF, DMAC1, PDE3A, EXT1, STXB6, LIMD1, PEX14, IFT43, ATP8A2, MTMR3, ATXN3, RFC1, CLEC16A, ARHGEF7, AMBRA1, ABCC4, BIN2, FANCM, FANCA, GTF2F2, SEMA3E, MARK2, TMEM67, C10ORF90, TMOD2, MSH2, MAIP1, SH3KBP1, ATL1, AFG3L2, MNAT1, CFAP61, ANK3, HMGA2, MYOM2, COG2, VPS41, TRAPPC11, PLCE1, TGFA, ANKFN1, HIP1, VPS37A, TJP1, NPHP4, PACSIN2, IQSEC1, SNX3, PDLIM5, BRCA2, DISC1, BLM, WDPCP, NRK, HSF2BP, STX12, PHACTR3, TRAK1, CDC42BPB, PTCD2, VRK1, GNAI1, TBC1D4, RANBP9, RESF1, DNAL1, LEMD3, RELN, HMGB1, TUBGCP3, NUDCD3, CDS2, TDRD7, RTTN, MDM1, POLR2M, CLVS1, UNC13B, TTC21B, UBAP2L, PLS1, SRGAP2, SEC23B, NIN, HAUS6, DNAH8, SLAMF1, SMARCA2, ETSS1, SMARCC1, KIF15, ZFYVE26, MAP2, DAW1, PEX6, FARP1, TDRD5, ATF2, NDUFAF6, GOLGA8B, CYLD, BBS4, GOLGA6B, CLVS2, THSD7B, KIAA0753, DOP1B, CEP44, ATP10B, GOLGA6D, YLPM1, SELENON, RB1CC1, PRKN, CDC42BPA, AFAP1, PCDH15, DPF3, LYST, PKP1, FRMPD4, ALS2, RACGAP1, CNOT6L, KANK4, DMC1, GOLGA6C, LRBA, SHANK2, MAP7, USP7, VAV3, SOX30, PTGFRN, RALB, CFAP74, MYO1D, SEC24D, ROCK1, ARHGAP28, KIF11, CHKA, ARID1B, INSR, BMF, YTHDF3, NEK6, SHROOM3, DDHD1, ARFGEF1, PDE4DIP, BID, ERN2, FLNB, FYCO1, ESYT2, SH3GLB1, TMED3, KRT6B, IFT81, UTRN, SNX9, ANAPC1, HDGFL3, BCL2L1, KRT25, CTDPI, PRKG1, INO80, FAM149B1, CIDEC, MICALL2, ATG4B, CDC14B, PCNT, CSDE1, FAT1, ACTR2, SFPQ, TTC39C, TOP3B, PRKAA2, SKA1, NDC80, MAP6, VASP, TACC2, KIFC1, IQGAP1, CAMLG, COX7A2L, MORC2, SREBF2, NRXN1, PCID2, SNAP91, CIBAR1, CENPE, TUBB6, ANLN, AKT3, JAK2, RPF2, CHCHD6, PATL1, CELSR2, TNKS, SGO1, GORAB, PCNA, SIAH3, UFL1, PRKCB, MIPEP, RFC2, SMTN, USH1C, SERBP1, SMPD4, NEDD9, GAP43, MTCL1, SAR1A, EML1, MAST2, GOLGA8J, TRAPPC3, ARFGEF3, BBS9, KRT6A, SHROOM2, MTPN, ABI1, PARK7, MAPK8, TOP3A, UBE2J2, NCAPG2, NDC1, ASB2, HFM1, HMCN1, CEP120, CYFIP2, KRT85, ASCC2, NDUFA10, MAP3K4, WASF3, CHAMP1, MAGEL2, RAD51AP1, PDE2A, RAB38, FBXW8, SDCBP, NSMCE1, NCK1, DRC7, CDCA8, TOP1, SNAP29, INTS13, DNMT3L, RSPH1, OCLN, AKAP11, TRPM7, MVB12B, PTK2, MARK4, CDH5, ARHGAP12, DIAPH1, FEZ2, CYFIP1, HOATZ, FRMD6, KIRREL1, SAXO1, PSTPIP2, ZFYVE1, ASAP1, NOS1AP, SORBS2, PDCL3, CCDC88A, CHCHD2, ADAMTS16, SPAG6, MDN1, CDC45, BICD1, BUB1, PPM1F, GOLGA8F, ARL13B, HYDIN, SLF1, EHBPI, MAPK9, HECW2, CDH2, RP1L1, ADCK1, SPTB, PID1, NRP1, FCHSD2, PRKCA, IFT46, COX10, RC3H1, EFL1, BCR, ELMO1, C14ORF39, ARFGAP3, CFAP70, STK36, B9D1, MACROH2A1, TOGARAM1, CHCHD3, MYO5B, MET, SPECC1, ATG5, NRAP, VMP1, FAM171A1, DHX29, BMP7, GOLGA6A, TRAPPC10, DDX6, DNAH17, PLIN2, EPB41L4A, ABL2, TRAPPC6B, RFX2, FHOD3, TTLL11, GOLGA8T, SLIT2, CNOT7, ESCO1, ERBB4, NUF2, PRKCQ, SAMM50, ANTXR1, SIPA1L3, TRDN, NLGN1, SHLD2, CHD9, EFNA5, GAS2L1, ARHGEF11, RAB27A, KIF13A, FRMD5, IQCJ -</p> <p>SCHIP1, IRAG2, HTT, RAD51B, CFAP44, FER, EYA2, RRGRIPI, STAR13, CHFR, EPS8, ROCK2, ATAT1, TERB2, DMRT1, CDCA5, RAB31, WASHC1, HOOK3, PNPLA3, ZNF423, HNRNPU, VTI1A, CEP72, RAB3GAP2, TANGO2, AKAP13, SEPTIN6, DNM1L</p> |
| GO:0030036 | actin cytoskeleton organization | 2.930490141329686e-9 | <p>NOTCH2, MTOR, NEBL, SVIL, MICAL3, DLC1, RDX, RALA, BCL2, MYO5A, ARHGAP26, SPIRE1, FGD4, MYO1E, CDC42EP3, AUTS2, CARMIL1, RHPN2, PARVB, MYO5C, TNIK, CTNNA3, DOCK2, DIAPH3, NTRK3, PHACTR1, CRACD, PAK1, EPB41L3, PHACTR2, STAU2, SEMA5A, ARHGAP44, NTF3, CD2AP, FRMD3, KANK1, FMN2, THSD7A, CTNNA2, PAK3, RAP1GDS1, CALD1, KLHL1, MRTFA, COBL, ARHGEF17, CORO2B, MYLK3, LIMCH1, FMN1, PAFAH1B1, TPM1, NF2, CTNNA1, PPP1R9A, MPRIP, ENAH, BCAS3, AIF1L, LDB3, CXADR, XIRP2, ABL1, GAS2, FGF10, PRKCE, PGM5, ATXN3, SEMA3E, TMOD2, SH3KBP1, MYOM2, HIP1, TJP1, NPHP4, PACSIN2, IQSEC1, PDLIM5, NRK, PHACTR3, CDC42BPB, PLS1, FARP1, BBS4, THSD7B, PRKN, CDC42BPA, PCDH15, FRMPD4, RACGAP1, KANK4, MYO1D, ROCK1, ARHGAP28, SHROOM3, ARF</p>                                                                                                                                                                                                                                                                                                                                                                                                                                                                                                                                                                                                                                                                                                                                                                                                                                                                                                                                                                                                                                                                                                                                                                                                                                                                                                                                                                                                                                                                                                                                                                                                                                                                                                                                                                                                                                                                                                                                                                                                                                                                                                                                                                                                                                                                                                                                                                                                                                                                                                            |

|            |                                  |                      |                                                                                                                                                                                                                                                                                                                                                                                                                                                                                                                                                                                                                                                                                                                                                                                                                                                                                                                                                                                                                                                                                                                                                                                                                                                                                                                                                                                                                                                                                                                                                                                                                                                                                                                                                                                                                                                             |
|------------|----------------------------------|----------------------|-------------------------------------------------------------------------------------------------------------------------------------------------------------------------------------------------------------------------------------------------------------------------------------------------------------------------------------------------------------------------------------------------------------------------------------------------------------------------------------------------------------------------------------------------------------------------------------------------------------------------------------------------------------------------------------------------------------------------------------------------------------------------------------------------------------------------------------------------------------------------------------------------------------------------------------------------------------------------------------------------------------------------------------------------------------------------------------------------------------------------------------------------------------------------------------------------------------------------------------------------------------------------------------------------------------------------------------------------------------------------------------------------------------------------------------------------------------------------------------------------------------------------------------------------------------------------------------------------------------------------------------------------------------------------------------------------------------------------------------------------------------------------------------------------------------------------------------------------------------|
|            |                                  |                      | GEF1,FLNB,UTRN,SNX9,PRKG1,MICALL2,FAT1,ACTR2,VASP,IQGAP1,ANLN,JAK2,SMTN,USH1C,NEDD9,ARFGEF3,SHROOM2,MTN,ABI1,ASB2,HMCN1,CYFIP2,WASF3,MAGEL2,SDCBP,NCK1,AKAP11,TRPM7,ARHGAP12,DIAPH1,CYFIP1,FRMD6,KIRREL1,PSPIP2,NOS1AP,SORBS2,PDCL3,CCDC88A,PPM1F,EHBP1,SPTB,NRP1,FCHSD2,BCR,ELMO1,MYO5B,MET,SPECC1,NRAP,FAM171A1,EPB41L4A,ABL2,FHOD3,SLIT2,ANTXR1,EFNA5,GAS2L1,ARHGEF11,FRMD5,FER,STARD13,EPS8,ROCK2,WASHC1,AKAP13                                                                                                                                                                                                                                                                                                                                                                                                                                                                                                                                                                                                                                                                                                                                                                                                                                                                                                                                                                                                                                                                                                                                                                                                                                                                                                                                                                                                                                         |
| GO:0030334 | regulation of cell migration     | 6.631650067360577e-9 | MTOR,PLCB1,TAF4A5,DLC1,RIPOR2,RDX,BCL2,SPRED1,CARMIL1,MCTP1,RIN2,ANO6,APC,CRKL,PTPRJ,DOCK10,EGFR,ANGPT1,MACF1,SCAI,NTRK3,C5,PHACTR1,FLT1,PRKD1,PAK1,RAPGEF2,ARSB,ONECUT1,LDB2,CCL28,ADAM10,HDAC9,IL1R1,APP,MTUS1,DOCK8,MAPRE2,SEMA5A,VCL,NTF3,SLC8A1,PTPRR,SRGAP2C,SRGAP2B,KANK1,MAP4K4,CTNNA2,PAK3,DUSP22,MAPK1,MGAT5,PDGFD,NRG3,NIPBL,LIMCH1,TPM1,NF2,TIAM1,PTPRK,SEMA3C,NAV3,AGO2,IL34,BCAS3,SYNE2,SEMA6D,TNR,DOCK4,PTPRT,ABL1,HDAC4,FGF10,NRG1,PRKCE,EGF,PLXNA2,ARHGEF7,ATP8A1,SEMA3E,GCSAML,STK10,EMILIN2,DOCK5,FUT9,PRR5L,TJP1,LDLRAD4,IQSEC1,WDPCP,SEMA3A,BMP2,UNC5D,RIN3,SEMA3D,RELN,HMGB1,FGF9,DOCK1,SRGAP2,SLAMF1,ETS1,SMOC2,KITLG,DACH1,IL6R,ROCK1,LYN,NTN1,INSR,YTHDF3,SNAI2,CD9,CARD10,JCAD,TWIST2,BMP5,CSF1,PRKG1,LAMA3,TNN,I L33,ROR2,ABHD2,AKT3,JAK2,ABCC8,NEDD9,ITGA6,MEOX2,BRMS1L,CEMIP,CCBE1,ITGA4,MYOCD,MEF2C,ADGRB1,WNT7A,SDCBP,NCK1,FGR,PPP2R3A,EPHA4,NUMB,ADAMTS9,FBXO31,PTK2,CDH5,DIAPH1,LAMB1,SEMA4D,JAM2,WNT5B,PPM1F,HDAC2,APELA,TET1,PTPRG,NRP1,PRKCA,MCC,BCR,FBLN1,RRAS2,BMPER,SRGAP3,MITF,EPHB2,MET,CDH13,MAGI2,FLRT2,LAMA1,BMP7,DLG5,ZMYND8,PDGFC,ABL2,SLIT2,ERBB4,ROBO1,FRMD5,NTNG1,CAMK1D,PIK3R3,FER,CCR2,STARD13,SEMA4B,ROCK2,WASHC1,IGF1R,DNM1L                                                                                                                                                                                                                                                                                                                                                                                                                                                                                                                                                                                                                                                                           |
| GO:0050790 | regulation of catalytic activity | 6.867803008308252e-9 | BCAR3,MTOR,SPOCK1,GARNL3,MYO9A,KSR1,PLCB1,DLC1,ZDHH C21,RIPOR2,RDX,BCL2,ARHGAP26,CHRNA7,RIMS1,FGD4,SPRE D1,ALK,RIN2,EGLN3,APC,CRKL,ARHGAP24,PTPRJ,DOCK10,EGFR,DENND1A,USP14,ANGPT1,CDK12,NEK7,RGS3,DOCK2,NTRK3,RXFP1,C5,PHACTR1,FLT1,RFC3,RABEP1,DGKI,CAST,SLC8A3,PRKD1,TBC1D19,PAK1,EPHA7,RALGPS1,RAPGEF2,ADGRB3,TAOK3,UBE2L3,LDB2,PPP2R2B,SMYD3,HERC2,GRM7,RPTOR,GHR,RALGAPA1,RAPGEF5,TBCD,PPP1R12B,HDAC9,PHACTR2,APP,CACNA1C,DOCK8,MAPRE2,ARHGAP44,NTF3,ACER2,PARN,ST18,SLC8A1,SERPINA6,MAP4K4,BMPR1B,PCSK6,RANBP2,RGS20,RAP1GDS1,NBN,IPT57,PRKCZ,MSH6,MCPH1,ARHGAP32,RGS9,MRTFA,DUSP22,MAPK1,MGAT5,RABGAP1L,ITIH5,PDGFD,PPP1R1C,ARHGEF17,NRG3,UBE2O,CARD18,STK38,TBC1D22A,CHN1,ECT2L,PAFAH1B1,CCNG2,NF2,MOB3B,BIRC6,AKAP9,RASGRF2,MRTFB,PPP6R3,RGL1,TIAM1,ARAP2,ARHGEF12,PPP2R5E,PLA2R1,DAPK1,RIC8B,TBC1D9,IL34,ADGRV1,BCAS3,WNT9B,CAPX,RANBP3L,DUSP16,TBC1D5,DOCK4,NUAK1,PTPRT,ABL1,SLC1A1,PSMF1,RAP1A,LATS2,NRG1,AP3B1,DENND2B,RASGRF1,MUSK,ZNF675,PRKCE,ASAP2,DENND4C,CD44,RGS12,PTPRO,EGF,PRRC1,TRIO,PDE3A,NSMAF,SPRED2,RPS6KA3,SCG5,PTPN2,PLXNA2,MCF2L,RFC1,ARHGEF7,AMBRA1,HTR2A,PPP2R2C,MARK2,HERC1,MSH2,EPHA6,HIPK3,CDKN2C,KNDC1,CLSPN,NOS2,MNAT1,HMGA2,CND3,DOCK5,MBP,PLCE1,TGFA,HIP1,CRIM1,VAV1,IQSEC1,BLM,PHACTR3,BMP2,EVI5,RALGAPA2,SGSM1,TBC1D4,RIN3,BMP2K,CABIN1,RELN,ARHGAP42,HMGB1,GNAQ,SH3BP5,CPAMD8,DSTYK,DOCK1,RAP1GAP,SRGAP2,SEC23B,SLAMF1,SNX6,PSD3,NEK10,FARP1,MOB1B,UMODL1,BBS4,MAPK8IP1,GABBR2,TBC1D13,KITLG,RCAN1,DAB1,PRKN,SH3PXD2A,NGEF,GRIN2A,IL6R,ALS2,RACGAP1,NLRC5,DOCK9,PTPRB,COPS8,VAV3,ITSN2,ARHGEF28,RALB,DENND2C,ROCK1,LYN,ARHGAP28,ARHGAP31,CTSB,EI F2B3,MMP16,INSR,XRCC4,ARFGEF1,BID,STAH2,ERN2,CARD10,RALGPS2,RASGRP1,SNX9,TMEM225,CSNK2A1,CSF1,SERPINB9,PRKG1,GRIN2B,DCUN1D4,PSAP,CDC14B,GPRC5C,ROR2,PPP2R2A,RASGEF1C,PTH,ITPRIP,IQGAP1,ANP32B,NRXN1,PCID2,FRY,FICD,CENPE,NET1,SIPA1L2,ALKAL2,JAK2,MADD,TNKS,PCN |



|            |                                                         |                       |                                                                                                                                                                                                                                                                                                                                                                                                                                                                                                                                                                                                                                                                                                                                                                                                                                                                                                                                                                                                                                                                                                                                                                                                                                                                                                                                                                                                                                                                                                                                                                                                                                                                                                       |
|------------|---------------------------------------------------------|-----------------------|-------------------------------------------------------------------------------------------------------------------------------------------------------------------------------------------------------------------------------------------------------------------------------------------------------------------------------------------------------------------------------------------------------------------------------------------------------------------------------------------------------------------------------------------------------------------------------------------------------------------------------------------------------------------------------------------------------------------------------------------------------------------------------------------------------------------------------------------------------------------------------------------------------------------------------------------------------------------------------------------------------------------------------------------------------------------------------------------------------------------------------------------------------------------------------------------------------------------------------------------------------------------------------------------------------------------------------------------------------------------------------------------------------------------------------------------------------------------------------------------------------------------------------------------------------------------------------------------------------------------------------------------------------------------------------------------------------|
|            |                                                         |                       | A, ANXA4, ZC3H15, RFC2, RTRAF, NEDD9, ITGA6, AGAP9, PPP1R17, ARFGEF3, PDP2, MAP2K6, ABI1, CEMIP, PARK7, MAPK8, OAZ2, PPME1, ADCYAP1R1, NCAPG2, RAPGEF4, MYOCD, CYFIP2, MEK2, MAP3K5, MAP3K4, SERPINI2, DBF4B, MLLT1, NCK1, FGR, PPP2R3A, DNMBP, TRIM23, EPHA4, CYTH4, DNMT3L, NTRK2, PRKAB1, PTK2, RCAN2, ARHGAP12, SEMA4D, SERPINB10, RASGEF1B, ASAP1, NOS1AP, CCDC88A, GPR55, BICD1, TNFSF11, FYN, KDM5A, PPM1F, SH2D3C, DOCK3, NCS1, ZFYVE28, ROR1, GPR137B, EPHB1, GRM5, TBC1D1, NRP1, ATPSCKMT, ITGA1, POR, BCR, ELMO1, RGS6, PRIM2, ARFGAP3, FBLN1, RAG1, SRGAP3, MACROH2A1, EPHB2, BCL2L13, RGD4, MET, SERPINB2, MAGI2, KALRN, GNAS, SERPINB7, TIAM2, BMP7, TNFAIP8, GAPVD1, GRM3, PDGFC, WDR41, ABL2, TRAPPC6B, SLIT2, ERBB4, SERPINB11, ROBO1, PRKCQ, RGD2, ANTXR1, SIPA1L3, MGMT, NOS1, EFNA5, ARHGEF11, ESR1, MYO9B, PRLR, HTT, PIK3R3, CCR2, STARD13, A2M, SPOCK3, AGAP1, ROCK2, RGS8, PSMD2, COL4A3, WASHC1, RGS7, STK3, DEPTOR, RSU1, HNRNPU, RAB3GAP2, IGF1R, PRKAG2, AKAP13, DNMI1L                                                                                                                                                                                                                                                                                                                                                                                                                                                                                                                                                                                                                                                                                                   |
| GO:0051056 | regulation of small GTPase mediated signal transduction | 8.613067322772321e-9  | NOTCH2, GARNL3, MYO9A, DLC1, RIPOR2, RDX, ARHGAP26, FGD4, AUTS2, ERBIN, ARHGAP24, DENND1A, DOCK2, SCAI, DGKI, RALGPS1, RALGAP1, DOCK8, MAPRE2, ARHGAP44, CD2AP, KANK1, MAP4K4, ITPKB, ARHGAP32, ARHGEF17, CHN1, RASGRF2, TIAM1, ARHGEF12, MAPKAP1, ABL1, FGF10, NRG1, RASGRF1, DENND4C, TRIO, MCF2L, PLCE1, VAV1, IQSEC1, RALGAP2, RELN, ARHGAP42, RAP1GAP, SRGAP2, PSD3, KITLG, NGEF, ALS2, RACGAP1, VAV3, ARHGEF28, ARHGAP28, ARHGAP31, ARFGEF1, RALGPS2, RASGRP1, CSF1, NET1, SIPA1L2, MADD, ARFGEF3, ADCYAP1R1, DNMBP, CYTH4, ARHGAP12, GPR55, DOCK3, NRP1, BCR, SRGAP3, EPHB2, MET, KALRN, TIAM2, ABL2, SLIT2, ROBO1, SIPA1L3, ARHGEF11, MYO9B, STARD13, EPS8, AKAP13                                                                                                                                                                                                                                                                                                                                                                                                                                                                                                                                                                                                                                                                                                                                                                                                                                                                                                                                                                                                                            |
| GO:0007411 | axon guidance                                           | 1.2314372031808234e-8 | NOTCH2, CNTN4, ROBO2, DSCAM, CDH4, NEO1, CNTN6, EPHA7, ADAMTSL1, APP, SEMA5A, BMPR1B, ALCAM, NCAM1, CHN1, NFIB, PRTG, ENAH, SEMA3C, SEMA6D, TNFR, USP33, PTPRO, TRIO, EXT1, PLXNA2, SEMA3E, EPHA6, BCL11B, ECE1, CNTN1, SEMA3A, UNC5D, SEMA3D, RELN, DRAXIN, GLI3, DCC, NTN1, DPYSL5, LAMA3, LMX1A, VASP, NRXN1, GAP43, NECTIN1, EPHA4, LHX9, PTK2, FEZ2, CYFIP1, SEMA4D, FYN, CNTN5, EPHB1, RPS6KA5, NRP1, NRXN3, EPHB2, FLRT2, KALRN, LAMA1, BMP7, SLIT2, CCDC141, ROBO1, PRKCQ, EFNA5, SLIT3, SEMA4B, GLI2                                                                                                                                                                                                                                                                                                                                                                                                                                                                                                                                                                                                                                                                                                                                                                                                                                                                                                                                                                                                                                                                                                                                                                                         |
| GO:0051239 | regulation of multicellular organismal process          | 1.336318962861873e-8  | NOTCH2, MTOR, WWC1, PTPRD, ULK2, FTO, PLCB1, TAF15, ZFP62, TENM4, ZDHHC21, PDE4D, BCL2, KCNA1, PRDM16, FBN1, CHRNA7, ROBO2, RIMS1, ZEB1, RARB, SPRED1, MINAR1, RIMS2, FOXJ2, ERBIN, RIN2, ANO6, DLGAP1, APC, HHLA2, TSHZ3, DSCAM, SOX5, SETD2, PTPRJ, EGFR, RFX3, ANGPT1, MACF1, CTNNA3, BCL11A, SOX6, CHSY1, CDH4, ATP2B2, NTRK3, C5, FLT1, MAPKBP1, SLC39A12, SLC8A3, PRKD1, EPHA7, CHRM3, SPEN, RAPGEF2, LRP2, ADGRB3, RUNX2, ARSB, FGF12, TMEM38B, TAF14, GHR, COL4A2, CELF2, PPP1R12B, ADAM10, HDAC9, IL1R1, APP, CACNA1C, CACNB2, STAU2, MAPRE2, SEMA5A, VCL, CD2AP, SLC8A1, PTPRR, FIG4, ABCG8, KCNE4, MAP4K4, ABCD2, BMPR1B, AKAP6, HOMER2, ARNT, RAB8B, PAK3, RFTN1, DIP2B, ITPKB, TRPC5, RNLS, PRKCZ, GRB10, EBF2, YAP1, BRINP1, MAPK1, HRH2, PLG, NIPBL, GABPA, CORO2B, CARD18, PAFAH1B1, EFEMP1, ITGB8, TPM1, NF2, CORIN, CTNNA1, AKAP9, PPARA, MEIS2, NFIB, MTRFB, PRTG, SYNJ1, TIAM1, GRM1, PLA2R1, SEMA3C, NAV3, SLC24A4, TMEM108, AGO2, ALPK2, JARID2, IL34, ANK2, ADGRV1, BCAS3, RYR2, BBS2, WNT9B, SEMA6D, SMARCA4, PARD3, TNFR, CXADR, DOCK4, MBD5, ABL1, HDAC4, SLC1A1, DROSHA, CAMK4, FGF10, ZC3HAV1, GRID2, LATS2, NRG1, INO80D, ASPM, AP3B1, ATP11C, ZBTB16, ZNF675, PRKCE, ESRRG, FBN2, PTPRO, EGF, ABCG9, PDZ3A, LNPEP, SPRED2, ATP8A2, PTPN2, PLXNA2, HTR2C, CD96, AMBRA1, LTBP1, OPRM1, HTR2A, FANCA, KREMEN1, SEMA3E, ALPL, MSH2, IGF2BP3, LINGO2, LUC7L, EPN2, NOS2, BICRAL, AFG3L2, ADAM12, MYLK2, EMILIN2, HMGA2, DOCK5, ECE1, MBP, TRPS1, PLCE1, IL17RA, FBXO32, TJP1, LDLRAD4, HLA-B, IQSEC1, BRCA2, DISC1, WDRCP, SEMA3A, BMP2, RC3H2, PSG9, SCN11A, GFI1B, BMP2K, SEMA3D, POLR3A, RELN, ARHGAP42, HMGB1, FGF9, TRAF3, ESRP1, UNC13B, TTC21B, DOCK1, RAP1GAP, PLS1, |

|            |                                              |                       |                                                                                                                                                                                                                                                                                                                                                                                                                                                                                                                                                                                                                                                                                                                                                                                                                                                                                                                                                                                                                                                                                                                                                                                                                                                                                                                                                                                                                                                                                                                                                                                                                                                                                                                                             |
|------------|----------------------------------------------|-----------------------|---------------------------------------------------------------------------------------------------------------------------------------------------------------------------------------------------------------------------------------------------------------------------------------------------------------------------------------------------------------------------------------------------------------------------------------------------------------------------------------------------------------------------------------------------------------------------------------------------------------------------------------------------------------------------------------------------------------------------------------------------------------------------------------------------------------------------------------------------------------------------------------------------------------------------------------------------------------------------------------------------------------------------------------------------------------------------------------------------------------------------------------------------------------------------------------------------------------------------------------------------------------------------------------------------------------------------------------------------------------------------------------------------------------------------------------------------------------------------------------------------------------------------------------------------------------------------------------------------------------------------------------------------------------------------------------------------------------------------------------------|
|            |                                              |                       | <p>NIN, DRAXIN, SLAMF1, SMARCA2, ETS1, GLI3, CGAS, SMARCC1, SMOC2, MAP2, ATF2, CYLD, BBS4, CFTR, NELL1, UBASH3A, KITLG, DC C, GTF2I, TADA2A, DAB1, SELENON, MTMR2, TBX20, DLGAP2, GRIN2A, PRKCH, TG, IL6R, RACGAP1, TOX, SHISA9, SCN10A, KCND3, KI R2DL4, NPAS2, ROCK1, LYN, DTX1, OVOL2, NTN1, ZFHX3, DPYSL5, ARID1B, INSR, NMU, PBX3, SNAI2, UFD1, RXRG, NSD2, CD9, CARD10, JCAD, ENPP1, RASGRP1, IGSF11, NDRG2, BMP5, CSF1, GHRH, CTDP1, HCN1, PRKG1, LAMA3, GRIN2B, INO80, CNMD, DHRS3, CELF4, MYCL, TNN, MED1, ATRN, IL33, AJAP1, ROR2, KL, BANK1, TMEM178A, IL10, ACTR2, CLSTN2, PTH, SOSTDC1, MAP6, IQGAP1, YBX3, NRXN1, PCID2, HIPK1, CADM1, TWIST1, AKT3, JAK2, RBM19, ZNF287, FH, UFL1, ADAMTS5, NFKBIA, PRKCB, ABCC8, ANXA4, NEDD9, ATP2B1, MAST2, CIDEA, AGO1, MEOX2, STAT1, BRMS1L, MAP2K6, MTPN, CCBE1, PARK7, ADAMTS18, MYOCD, MEF2C, ADGRB1, RXRA, WNT7A, NDFIP1, WASF3, FBXW8, SDCBP, PASK, FLVCR1, FGR, EPHA4, NTRK2, IL1RAPL1, NUMB, ADAMTS9, WNT2B, TNNI1, CD101, SHISA6, IL17RD, FBXO31, PRKAB1, PTK2, CDH5, NFKBID, CLDN18, CYFIP1, SEMA4D, JAM2, ZBTB20, FAT4, RUNX1, NOS1AP, PDCL3, GPR55, TNFSF11, PPM1F, ADGRL2, HDAC2, CRTAM, APELA, TET1, ASB3, NTN4, GPR137B, EPHB1, GRM5, RPS6KA5, PTPRG, NRP1, PRKCA, ATPSCKMT, FAIM, RC3H1, CHODL, POR, MCC, BCR, FBLN1, RAG1, BMPER, CUX1, MACROH2A1, MITF, EPHB2, CD38, MET, SERPINB2, ATG5, MLIP, FLRT2, MYB, KALRN, GNAS, LAMA1, SERPINB7, TIAM2, BMP7, DLG5, TMEM25, PDGFC, SLIT2, PLCL1, ERBB4, IL20RB, SYNDIG1, ROBO1, PBX1, PRKCQ, TRDN, NLGN1, SHLD2, NOS1, SLC6A3, ASIC2, EFNA5, EHMT1, ESR1, LOXL2, CACNA2D1, PRLR, HLA-F, CCR2, STARD13, SEMA4B, HRH1, ROCK2, PRDM1, RORA, STMP1, IL16, DMRT1, HSPG2, COL4A3, HOOK3, FSTL4, STK3, ZNF423, IGF1R, GLI2, THRB</p> |
| GO:0097485 | neuron projection guidance                   | 1.5310767707303552e-8 | <p>NOTCH2, CNTN4, ROBO2, DSCAM, CDH4, NEO1, CNTN6, EPHA7, ADAMTSL1, APP, SEMA5A, BMPR1B, ALCAM, NCAM1, CHN1, NFIB, PRTG, ENAH, SEMA3C, SEMA6D, TNFR, USP33, PTPRO, TRIO, EXT1, PLXNA2, SEMA3E, EPHA6, BCL11B, ECE1, CNTN1, SEMA3A, UNC5D, SEMA3D, RELN, DRAXIN, GLI3, DCC, NTN1, DPYSL5, LAMA3, LMX1A, VASP, NRXN1, GAP43, NECTIN1, EPHA4, LHX9, PTK2, FEZ2, CYFIP1, SEMA4D, FYN, CNTN5, EPHB1, RPS6KA5, NRP1, NRXN3, EPHB2, FLRT2, KALRN, LAMA1, BMP7, SLIT2, CCDC141, ROBO1, PRKCQ, EFNA5, SLIT3, SEMA4B, GLI2</p>                                                                                                                                                                                                                                                                                                                                                                                                                                                                                                                                                                                                                                                                                                                                                                                                                                                                                                                                                                                                                                                                                                                                                                                                                        |
| GO:0007420 | brain development                            | 1.5335575656019834e-8 | <p>CNTN4, IMP2L, TRAPPC9, PLCB1, DLC1, BCL2, ODAD2, ALDH1A2, ROBO2, ZEB1, RARB, ALK, NEGR1, CNTNAP2, CRKL, SETD2, SLC4A10, EGFR, SOX6, ATP2B2, PHACTR1, EPHA7, RAPGEF2, LRP2, SSBP3, APP, DCLK1, SEMA5A, SYT1, SLC8A1, SRGAP2C, CTNNA2, KLHL1, MCPH1, ZSWIM6, NRG3, NIPBL, PAFAH1B1, NF2, CTNNA1, MEIS2, NFIB, SYNJ1, TMEM108, SYNE2, BBS2, WNT9B, SEMA6D, MAPKAP1, TNFR, ATRX, ELAVL4, ABL1, SLC1A1, DNAH5, FGF10, GRID2, NRG1, ASPM, EGF, EXT1, PLXNA2, KDM7A, SEMA3E, HERC1, KND1, MNAT1, BCL11B, MBP, AK8, CNTN1, BRCA2, DISC1, SEMA3A, BMP2, RELN, FGF9, TTC21B, TSPAN2, SRGAP2, NIN, DRAXIN, GLI3, CASP5, RERE, ATF2, BBS4, DAB1, GRIN2A, ATXN1, TOX, SHANK2, ZFHX3, PBX3, NDRG2, BMP5, KCNC1, GHRH, PRKG1, GRIN2B, SYNJ2, MED1, ATRN, LMX1A, TACC2, ANP32B, NRXN1, CADM1, AKT3, CELSR2, ATP2B1, EML1, SHROOM2, SLC6A11, MTPN, POU1F1, FOXP2, CEP120, WNT7A, GABRA5, NTRK2, NUMB, WNT2B, LAMB1, UBE3A, FAT4, FYN, ADGRL2, ARL13B, HYDIN, ATP5PF, UGP2, ARNT2, CDH2, CNTN5, ITGA8, XRN2, EPHB1, PTPRG, NRP1, BCR, STK36, EPHB2, SLC1A2, CA10, BMP7, DLG5, KIRREL3, BPTF, SLIT2, CCDC141, ERBB4, ROBO1, PBX1, CTTNBP2, SLC6A3, KDM4B, FOXB1, MACROD2, RORA, ATAT1, HSPG2, NCOA6, RGS7, HOOK3, ZNF423, IGF1R, GLI2</p>                                                                                                                                                                                                                                                                                                                                                                                                                                                                                                                   |
| GO:0050804 | modulation of chemical synaptic transmission | 1.8516777844771103e-8 | <p>CNTN4, NSG1, PTPRD, SLC24A2, LRRC4C, UNC13C, PLCB1, PTPRA, STXBP1, ERC1, LRFN2, CHRNA7, RIMS1, RIMS2, MCTP1, CACNG2, DLGAP1, TSHZ3, SLC4A10, BTBD9, GRIK3, DGKI, GRIA1, SLC8A3, RAPGEF2, GRM7, APP, CACNB2, STAU2, SYT1, NTF3, ERC2, SYN3, PRKCZ, MAPK1, NRG3, SORCS3, GRIK4, PPP1R9A, AKAP9, RASGRF2, GRM1, TMEM108, CDH11, USP8, TNFR, GRM8, ELAVL4, ABL1, SLC1A1, RAP1A, GRID2, RASGRF1, PRKCE, DGKB, HTR2A, APBA2, PACSIN2, DISC1, RELN, GRIK2, MCTP2, ZZEF1, DCC, PRKN, MTMR2, DLGAP2,</p>                                                                                                                                                                                                                                                                                                                                                                                                                                                                                                                                                                                                                                                                                                                                                                                                                                                                                                                                                                                                                                                                                                                                                                                                                                          |

|            |                                                                  |                       |                                                                                                                                                                                                                                                                                                                                                                                                                                                                                                                                                                                                                                                                                                                                                                                                                                                                               |
|------------|------------------------------------------------------------------|-----------------------|-------------------------------------------------------------------------------------------------------------------------------------------------------------------------------------------------------------------------------------------------------------------------------------------------------------------------------------------------------------------------------------------------------------------------------------------------------------------------------------------------------------------------------------------------------------------------------------------------------------------------------------------------------------------------------------------------------------------------------------------------------------------------------------------------------------------------------------------------------------------------------|
|            |                                                                  |                       | GRIN2A,SHISA9,SHANK2,PLCB4,GRID1,NMU,IGSF11,HCN1,GRIN2B,CELF4,ROR2,CLSTN2,NRXN1,JAK2,PRKCB,SLC6A1,MEF2C,ADGRB1,WNT7A,S100B,EPHA4,NTRK2,SHISA6,GRIK1,SCGN,CYFIP1,FYN,CDH2,FBXL20,EPHB1,GRM5,BCR,NRXN3,EPHB2,CD38,CACNG3,TMEM25,GRM3,PLCL1,SORCS2,NLGN1,NTNG1,CCR2,HRH1                                                                                                                                                                                                                                                                                                                                                                                                                                                                                                                                                                                                         |
| GO:0099177 | regulation of trans-synaptic signaling                           | 2.147304317530614e-8  | CNTN4,NSG1,PTPRD,SLC24A2,LRR4C,UNC13C,PLCB1,PTPRA,STXBP1,ERC1,LRFN2,CHRNA7,RIMS1,RIMS2,MCTP1,CACNG2,DLGAP1,TSHZ3,SLC4A10,BTBD9,GRIK3,DGKI,GRIA1,SLC8A3,RAPGEF2,GRM7,APP,CACNB2,STAU2,SYT1,NTF3,ERC2,SYN3,PRKCZ,MAPK1,NRG3,SORCS3,GRIK4,PPP1R9A,AKAP9,RASGRF2,GRM1,TMEM108,CDH11,USP8,TNR,GRM8,ELAVL4,ABL1,SLC1A1,RAP1A,GRID2,RASGRF1,PRKCE,DGKB,HTR2A,APBA2,PACSIN2,DISC1,RELN,GRIK2,MCTP2,ZZEF1,DCC,PRKN,MTMR2,DLGAP2,GRIN2A,SHISA9,SHANK2,PLCB4,GRID1,NMU,IGSF11,HCN1,GRIN2B,CELF4,ROR2,CLSTN2,NRXN1,JAK2,PRKCB,SLC6A1,MEF2C,ADGRB1,WNT7A,S100B,EPHA4,NTRK2,SHISA6,GRIK1,SCGN,CYFIP1,FYN,CDH2,FBXL20,EPHB1,GRM5,BCR,NRXN3,EPHB2,CD38,CACNG3,TMEM25,GRM3,PLCL1,SORCS2,NLGN1,NTNG1,CCR2,HRH1                                                                                                                                                                                  |
| GO:0007169 | transmembrane receptor protein tyrosine kinase signaling pathway | 2.5007549234387142e-8 | BCAR3,ANKS1B,PLCB1,PTPRA,MYO1E,ALK,ERBIN,APC,CRKL,PTPRJ,EGFR,ANGPT1,NEDD4,NTRK3,FLT1,PRKD1,PAK1,EPHA7,RAPGEF2,RUNX2,FGF12,GHR,COL4A2,NTF3,PTPRR,KANK1,ARNT,PAK3,PRKCZ,GRB10,SHC4,MAPK1,PDGFR,NRG3,GFRA1,CHN1,EFEMP1,ADAMTS3,TIAM1,TMEM108,BLK,MBD5,PTPRT,ABL1,PTPN12,PRKAA1,FGF10,NRG1,MUSK,EGF,EXT1,PTPN2,ARHGAP7,EPHA6,EPN2,GFRA2,CCND3,PLCE1,TGFA,HIP1,CRIM1,VAV1,BMP2,SOGA1,FGF9,ZNF106,DSTYK,FAM83B,SMARCC1,SNX6,SMOC2,IDE,GAREM1,NEU3,SLC30A10,PTPRE,NGEF,ARID5B,ARHGAP28,LYN,INSR,CUL5,ZDHHC17,JCAD,ENPP1,BMP5,CSF1,GHRH,GRB14,ROR2,KL,IQGAP1,CAMLG,NRXN1,JAK2,SVEP1,PRKCB,NEDD9,ABI1,CCBE1,MYOCD,CYFIP2,NCK1,FGR,EPHA4,NTRK2,MVB12B,PTK2,CYFIP1,FAT4,CNKSRI,CCDC88A,FYN,DOK5,ZFYVE28,ROR1,EPHB1,PTPRG,PID1,NRP1,SAMD12,ITGA1,KIF16B,EPHB2,MET,CDH13,STXBP4,FLRT2,KALRN,PDGFR,ERBB4,ROBO1,PRKCQ,EFNA5,PRLR,PIK3R3,FER,COL4A3,FSTL4,IGF1R                               |
| GO:0048589 | developmental growth                                             | 3.895050962230821e-8  | NOTCH2,MTOR,WWC1,BNC2,ULK2,SCAPER,FTO,PLCB1,ZFPM2,TENM4,BCL2,RIMS1,RARB,RIMS2,AUTS2,DSCAM,SLC4A10,MACF1,BCL11A,TMEM182,CDH4,LARGE1,EPHA7,TMEM38B,GHR,NEDD4L,APP,DCLK1,SEMA5A,SYT1,VCL,AURKA,BMPRI1B,AKAP6,DIP2B,TRPC5,NBN,PRKCZ,COL27A1,COBL,YAP1,ALCAM,PLG,NIPBL,FMN1,PAFAH1B1,PPARA,SEMA3C,TMEM108,JARID2,BBS2,SEMA6D,TNR,CXADR,MBD5,ATRX,ABL1,PTPN12,GAS2,FGF10,LATS2,NRG1,ASPM,MUSK,EXT1,ATP8A2,SEMA3E,APBA2,EVC,AFG3L2,PDLIM5,BRCA2,DISC1,SEMA3A,RC3H2,SEMA3D,FGF9,SLC23A2,PLS1,NIN,DRAXIN,GLI3,MAP2,ATF2,BBS4,KPNA1,DCC,SELENON,PRKN,TBX20,PCDH15,ARID5B,ITSN2,PTGFRN,NTN1,INSR,COLQ,CD9,CSF1,GHRH,CTDP1,TNN,PSAP,MED1,KDM6A,ATRIN,IQGAP1,YBX3,GAP43,MTPN,IMPACT,ITGA4,NCAPG2,CYFIP2,MEF2C,WNT7A,FLVCR1,PPP2R3A,CYFIP1,UBE3A,SEMA4D,RUNX1,SORBS2,SPAG6,EYS,NRP1,POR,MAGI2,SLC1A2,GNAS,CPQ,SLIT2,ERBB4,SLC6A3,EFNA5,SLIT3,ESR1,PRLR,RAD51B,SEMA4B,FSTL4,STK3,GLI2,AKAP13 |
| GO:0009887 | animal organ morphogenesis                                       | 4.3587824732925886e-8 | NOTCH2,BCAR3,MTOR,FREM1,ZFPM2,DLC1,RIPOR2,RP1,BCL2,ALDH1A2,FBN1,ROBO2,TENM3,ZEB1,RARB,USH2A,PAPPA2,MLLT3,GPC6,MYO3B,DSCAM,CRKL,SOX5,SETD2,SLC4A10,EGFR,CRB1,SOX6,CHSY1,FLI1,RXFP1,EDAR,LRP2,RUNX2,PRICKLE2,GHR,STAU2,BMPRI1B,CTNNA2,IFT57,COL27A1,YAP1,MAPK1,ZNRF3,ABLIM1,NRG3,NIPBL,FAT3,FMN1,PAFAH1B1,EFEMP1,TMP1,NF2,CTNNA1,ANKRD11,PPARA,MEIS2,NFIB,NR5A2,TIAM1,SEMA3C,SLC24A4,ALPK2,DNAH11,CPE,RYR2,BBS2,WNT9B,XIRP2,ABL1,SLC1A1,FGF10,NRG1,AP3B1,SETDB2,FBN2,EXT1,ATP8A2,CNNM4,ALPL,FHL2,MYLK2,BCL11B,TGFA,EGFLAM,MTHFD1L,WDPCC,BMP2,PTCD2,ASXL3,PDE6C,FGF9,TDRD7,PLS1,GLI3,MEGF11,SMARCC1,CUL1,LAMC1,ATF2,BBS4,LAMC3,COL5A1,CFTR,RORB,MYO3A,TBX20,PCDH15,ARID5B,CDH23,SCN10A,ADGR                                                                                                                                                                                      |

|            |                         |                      |                                                                                                                                                                                                                                                                                                                                                                                                                                                                                                                                                                                                                                                                                                                                                                                                                                                                                                                                                                                                                                                                                                                                                                                                                                                                                                                                                                                                                                                                                                                                                                                                                                                                                                                                        |
|------------|-------------------------|----------------------|----------------------------------------------------------------------------------------------------------------------------------------------------------------------------------------------------------------------------------------------------------------------------------------------------------------------------------------------------------------------------------------------------------------------------------------------------------------------------------------------------------------------------------------------------------------------------------------------------------------------------------------------------------------------------------------------------------------------------------------------------------------------------------------------------------------------------------------------------------------------------------------------------------------------------------------------------------------------------------------------------------------------------------------------------------------------------------------------------------------------------------------------------------------------------------------------------------------------------------------------------------------------------------------------------------------------------------------------------------------------------------------------------------------------------------------------------------------------------------------------------------------------------------------------------------------------------------------------------------------------------------------------------------------------------------------------------------------------------------------|
|            |                         |                      | G6,LRIG1,OVOL2,NTN1,MMP16,HOXC13,INSR,PBX3,SNAI2,ASH1L,HOXC4,SP3,NSD2,DZANK1,BMP5,WDR72,CSF1,HCN1,LAMA3,DHRS3,FOXN3,SLC40A1,MED1,KDM6A,ATRN,AJAP1,FAT1,TT C39C,SOSTDC1,HIPK1,TWIST1,AKT3,VSX1,CELSR2,ADAMTS5,ALX4,USH1C,ITGA6,OTOP1,EXT2,GRXCR1,STAT1,SHROOM2,CSMD1,ASB2,MEF2C,WNT7A,RBPMS2,NECTIN1,WWOX,FLVCR1,FGR,PPP2R3A,NTRK2,LHX9,WNT2B,TNNI1,PTK2,ANKRD6,LAMB1,FAT4,ADAMTS16,TNFSF11,ARL13B,HDAC2,TBX15,COL18A1,ROR1,CDH2,ITGA8,NTN4,EPHB1,NRP1,SDK1,POR,BCR,DGCR2,EPHB2,MAGI2,FLRT2,LAMA1,GREB1L,ATRNL1,BMP7,DLG5,PDGFC,EYA1,SLIT2,EXOC4,ERBB4,ROBO1,PBX1,SLIT3,ESR1,NTNG1,RPGRIPI1,PRDM1,HSPG2,PTPRQ,APCDD1,GLI2,THRB                                                                                                                                                                                                                                                                                                                                                                                                                                                                                                                                                                                                                                                                                                                                                                                                                                                                                                                                                                                                                                                                                                          |
| GO:0006468 | protein phosphorylation | 5.254943632760095e-8 | BCAR3,MTOR,ULK2,NLK,KSR1,PTPRA,PDE4D,ERC1,BCL2,CHRNA7,PIK3C3,SPRED1,ALK,MAP3K9,MYO3B,APC,CRKL,ERG,TNINK3,FLT1,SLC8A3,PRKD1,PAK1,EPHA7,RAPGEF2,PELI2,TAOK3,SMYD3,RPTOR,GHR,ADAM10,APP,RPS6KA2,SAMSN1,PHKB,DCLK1,NTF3,AURKA,SLC8A1,MAP4K4,BMPR1B,PAK3,ITPKB,TRPC5,NBN,PRKCZ,TAF4B,DUSP22,RIPK4,MAPK1,PDGFD,NRG3,GFRA1,STK38,PTPN13,MYLK3,LIMCH1,EFEMP1,CCNG2,TLK1,NF2,MOB3B,BIRC6,AKAP9,RSRC1,PAK5,DAPK1,STK32B,ALPK2,IL34,MELK,WNT9B,DUSP16,PARD3,MAPKAP1,BLK,NUAK1,PTPRT,ABL1,SLC1A1,PRKAA1,MAST4,RAP1A,CAMK4,FGF10,PEAK1,LATS2,NRG1,MUSK,ZNF675,PRKCE,SLCO3A1,WNK2,CD44,PTPRO,EGF,ALPK3,PRRC1,TRIO,SPRED2,RPS6KA3,PTPN2,STK38L,HTR2A,TAF3,MARK2,EPHA6,HIPK3,CDKN2C,GRK3,KNDC1,CLSPN,STK10,MNAT1,MYLK2,HMGA2,CCND3,STK32A,PLCE1,TGFA,PRR5L,LDLRAD4,CNTN1,BLM,NRK,BMP2,MYLK4,CDC42BPB,VRK1,BMP2K,RELN,GNAQ,FGF9,SH3BP5,DSTYK,SNX6,CNKSR3,NEK10,MOB1B,ATF2,MAPK8IP1,KITLG,MAP4K3,TADA2A,DAB1,RB1CC1,MYO3A,PRKN,CDC42BPA,MAPK10,TRPM6,PRKCH,HUNK,IL6R,ALS2,MKNK1,SNX25,PTPRB,COPS8,MOK,RALB,ROCK1,LYN,CHKA,INSR,NEK6,ERN2,CARD10,ENPP1,RASGRP1,SNX9,CSNK2A1,BMP5,CSF1,PRKG1,SMAD5,GPRC5C,ROR2,BANK1,PRKAA2,CSF2RB,IQGAP1,NRXN1,HIPK1,CENPE,AKT3,ALKAL2,JAK2,MADD,TNKS,PRKCB,RTRAF,BRD4,NEDD9,NRBP1,MAST2,MAP2K6,ABI1,CEMIP,IMPACT,PARK7,MAPK8,PPME1,NCAPG2,MYOCD,MEF2C,MAP3K5,MAP3K4,PKN2,DBF4B,SDCBP,PASK,MLLT1,NCK1,FGR,CDCA8,TOP1,EPHA4,NTRK2,OCLN,TRPM7,PRKAB1,PTK2,MARK4,CDH5,SEMA4D,KIRREL1,PDCL3,CCDC88A,TNFSF11,FYN,BUB1,PPM1F,HDAC2,SH2D3C,DOCK3,ZFYVE28,MAPK9,ROR1,EPHB1,GRM5,RPS6KA5,PID1,NRP1,PRKCA,BCR,SNRK,FBLN1,STK36,BMPER,MACROH2A1,EPHB2,CSNK1G1,CDK14,MET,CAMK1G,KALRN,LAMA1,BMP7,PDGFC,ABL2,SLIT2,CNOT7,ERBB4,ROBO1,PRKCQ,NOS1,EFNA5,NSD1,PRLR,HTT,CAMK1D,PIK3R3,FER,ROCK2,PDK1,STK3,DEPTOR,IGF1R,PRKAG2,AKAP13,MORC3 |
| GO:0060322 | head development        | 5.415562675149977e-8 | CNTN4,IMMP2L,TRAPPC9,PLCB1,DLC1,BCL2,ODAD2,ALDH1A2,ROBO2,ZEB1,RARB,ALK,NEGR1,CNTNAP2,CRKL,SETD2,SLC4A10,EGFR,SOX6,ATP2B2,PHACTR1,EPHA7,RAPGEF2,LRP2,SSBP3,APP,DCLK1,SEMA5A,SYT1,SLC8A1,SRGAP2C,CTNNA2,KLHL1,MCPH1,ZSWIM6,MAPK1,CRISPLD2,NRG3,NIPBL,PAFAH1B1,NF2,CTNNA1,ANKRD11,MEIS2,NFIB,SYNJ1,TMEM108,SYNE2,BBS2,WNT9B,SEMA6D,MAPKAP1,TNR,ATRX,ELAVL4,ABL1,SLC1A1,DNAH5,FGF10,GRID2,NRG1,ASPM,EGF,EXT1,PLXNA2,KDM7A,SEMA3E,HERC1,KNDC1,MNAT1,BCL11B,MBP,AK8,CNTN1,BRCA2,DISC1,SEMA3A,BMP2,RELN,FGF9,TTC21B,TSPAN2,SRGAP2,NIN,DRAXIN,GLI3,CASP5,RERE,ATF2,BBS4,DAB1,GRIN2A,ARID5B,ATXN1,TOX,SHANK2,ZFH3,PBX3,NDRG2,BMP5,KCNC1,GHRH,PRKG1,GRIN2B,SYNJ2,MED1,ATRN,LMX1A,TACC2,ANP32B,NRXN1,CADM1,AKT3,CELSR2,ATP2B1,EML1,SHROOM2,SLC6A11,MTPN,POU1F1,FOXP2,CEP120,WNT7A,FLVCR1,GABRA5,NTRK2,NUMB,WNT2B,LAMB1,UBE3A,FAT4,FYN,ADGRL2,ARL13B,HYDIN,ATP5PF,UGP2,ARNT2,CDH2,CNTN5,ITGA8,XRN2,EPHB1,DDX10,PTPRG,NRP1,BCR,STK36,EPHB2,SLC1A2,CA10,BMP7,DLG5,KIRREL3,BPTF,SLIT2,CCDC141,ERBB4,ROBO1,PBX1,CTTNBP2,SLC6A3,KDM4B,FOXBI,MACROD2,RORA,ATAT1,HSPG2,NCOA6,R                                                                                                                                                                                                                                                                                                                                                                                                                                                                                                                                                                                                                                                                            |

|            |                                           |                      |                                                                                                                                                                                                                                                                                                                                                                                                                                                                                                                                                                                                                                                                                                                                                                                                                                                                                                                                                                                                                                                                                                                                                                                                                                                                                                                                                                                                                                                                                                                                                                                                                                                                                                                                                                                                                                                                                                                                                                                                                                                                                                                                                                                                                                                                                                                                                                                                                                                                                                                                                                                                                                                                                                                                                                                                                                                                                                                                                                                                                                                                                                                                                                                                                                                                                                                                                                                                                                                       |
|------------|-------------------------------------------|----------------------|-------------------------------------------------------------------------------------------------------------------------------------------------------------------------------------------------------------------------------------------------------------------------------------------------------------------------------------------------------------------------------------------------------------------------------------------------------------------------------------------------------------------------------------------------------------------------------------------------------------------------------------------------------------------------------------------------------------------------------------------------------------------------------------------------------------------------------------------------------------------------------------------------------------------------------------------------------------------------------------------------------------------------------------------------------------------------------------------------------------------------------------------------------------------------------------------------------------------------------------------------------------------------------------------------------------------------------------------------------------------------------------------------------------------------------------------------------------------------------------------------------------------------------------------------------------------------------------------------------------------------------------------------------------------------------------------------------------------------------------------------------------------------------------------------------------------------------------------------------------------------------------------------------------------------------------------------------------------------------------------------------------------------------------------------------------------------------------------------------------------------------------------------------------------------------------------------------------------------------------------------------------------------------------------------------------------------------------------------------------------------------------------------------------------------------------------------------------------------------------------------------------------------------------------------------------------------------------------------------------------------------------------------------------------------------------------------------------------------------------------------------------------------------------------------------------------------------------------------------------------------------------------------------------------------------------------------------------------------------------------------------------------------------------------------------------------------------------------------------------------------------------------------------------------------------------------------------------------------------------------------------------------------------------------------------------------------------------------------------------------------------------------------------------------------------------------------------|
|            |                                           |                      | <i>GS7,HOOK3,ZNF423,IGF1R,GLI2</i>                                                                                                                                                                                                                                                                                                                                                                                                                                                                                                                                                                                                                                                                                                                                                                                                                                                                                                                                                                                                                                                                                                                                                                                                                                                                                                                                                                                                                                                                                                                                                                                                                                                                                                                                                                                                                                                                                                                                                                                                                                                                                                                                                                                                                                                                                                                                                                                                                                                                                                                                                                                                                                                                                                                                                                                                                                                                                                                                                                                                                                                                                                                                                                                                                                                                                                                                                                                                                    |
| GO:1901564 | organonitrogen compound metabolic process | 5.735515533067498e-8 | <i>BCAR3,MTOR,SPOCK1,NSG1,SLC17A1,IMMP2L,PTPRD,TMTC1,SLC25A21,ULK2,NLK,LONP2,FTO,KSR1,AGBL1,PLCB1,TTC3,TPRSS2,DLC1,TNRC6B,DPP10,ZDHHC21,PTPRA,PDE4D,RDX,ERC1,NME7,SLC44A5,BCL2,PRDM16,LPCAT2,F13A1,GPHN,CHRNA7,PIK3C3,EPC2,SPRED1,GALNT1,ENPEP,MINAR1,PCMTD1,ALK,AUTS2,CARMIL1,PJA2,BABAM2,PAPPA2,HACD2,HLCS,GLYAT,MLLT3,EGLN3,MAP3K9,MYO3B,MOCOS,SPON1,CPA6,APC,RTN1,CRKL,SETD2,ERG,TNIK,PTPRJ,KDM4C,NEK4,EGFR,USP14,ANGPT1,CDK12,PRKACB,NEK7,NCOR1,RNF220,NEDD4,MTRF1,GNPTAB,NSMCE2,BTBD9,BCL11A,PSMB2,SGMS1,CHSY1,RPRD1A,PTPN4,B3GALT5,NTRK3,LARGE1,C5,TUSC3,FBXL7,CYP2C9,FLT1,ADAMTS6,TASP1,PSMA8,CAST,SLC8A3,PRKD1,TPTE2,PAK1,EPHA7,NCOA7,CHRM3,ADSS2,CHSY3,RAPGEF2,PELI2,LRP2,CPS1,TAOK3,LDLRAD3,CPEB4,AGK,BCKDHB,SLC44A1,UBE2L3,PPP2R2B,PUM3,PTPRN2,SMYD3,TYW1,HERC2,LRGUK,RPTOR,GHR,WDSUB1,NEDD4L,ADAM32,ADAM10,HDAC9,UBE2G1,APP,ADK,RPS6KA2,SAMSN1,KYNU,KDM1B,KLHL13,PHKB,DCLK1,USP18,NTF3,ACER2,PARP15,CD2AP,AURKA,PARN,ST18,SLC8A1,PTPRR,MARCHF1,SERPINA6,PLGRKT,UPP2,ECPAS,MAP4K4,BMPR1B,FMN2,PCSK6,ARNT,PAK3,TTL7,DIP2B,RANBP2,LARP1,ITPKB,TRPC5,PDE10A,UBE2E2,RAP1GDS1,HHAT,CHST8,NBN,CUBN,IFT57,PRKCZ,SPOP,MAN2A2,DIP2A,ST8SIA5,HECW1,ADAMTS17,PHF19,TAF4B,SENP6,DUSP22,GALNT14,SEM1,WDR70,PPM1L,RIPK4,MAPK1,MGAT5,ITIH5,SGTB,ADAM22,USP25,KMT2E,PLG,PAPPA,PCGF5,PDGFD,ZNRF3,XXYLT1,NRG3,UBE2O,GFRA1,NIPBL,GALNT16,RNGTT,CARD18,STK38,PTPN13,MYLK3,ACSBG1,KANSL1,LIMCH1,PAFAH1B1,ATF6,EFEMP1,TLL1,DCAF1,ITGB8,CCNG2,TLK1,NF2,MRPS22,ZDHHC14,CORIN,MOB3B,BIRC6,AKAP9,KLF15,PPARA,HS3ST2,ERMP1,PPP6R3,ADAMTS3,UBE3D,RSRC1,PTPRK,PAK5,ST6GALNAC3,TRERF1,PPP2R5E,PDZRN3,EIF3D,DAPK1,FAR2,ACSM2B,AGO2,STK32B,ALPK2,JARID2,GATAD2B,CPE,IL34,ADGRV1,MELK,WNT9B,HECTD4,CLPX,ASAH2B,DUSP16,MRPS35,USP8,PARD3,MAPKAP1,TNRC6C,PIAS1,UBE2R2,BLK,OLA1,ATRX,NUAK1,PTPRT,ELAVL4,ABL1,PTPN12,HDAC4,OXR1,SLC1A1,PRKAA1,MRPS27,TTL5,EIPR1,ADAMTS14,MAST4,GUCY1A2,PSMF1,ATE1,RAP1A,HECTD2,CAMK4,BAZ2A,MANBA,FGF10,FBXL13,GALC,TGM1,PEAK1,LATS2,NRG1,AP3B1,PAH,ABCB7,ZBTB16,MUSK,GALNTL6,ZNF675,SMARCD1,SETDB2,PRKCE,FOXK2,SLCO3A1,METAP1D,NXN,WNK2,USP33,CERS6,CD44,PTPRO,EGF,ALPK3,PRRC1,TRIO,EXT1,NSMAF,LNPEP,SPRED2,ADAMTS2,RPS6KA3,MARCF8,SCG5,MTMR3,PTPN2,TRIM5,ATXN3,ST8SIA6,ALG10B,AMBRA1,STK38L,GALNT10,KDM7A,PRMT8,HTR2A,FANCM,FANCA,DAZL,FARS2,PPP2R2C,TAF3,RPRD1B,MARK2,GMPR,TMEM67,ALPL,C10ORF90,ABHD17C,PUM1,HERC1,IGF2BP3,EPHA6,SLC2A13,HIPK3,CDKN2C,GRK3,CPXM2,KNDC1,SPSB4,CLSPN,NOS2,AFG3L2,STK10,MNAT1,TMTC2,ADAM12,MYLK2,XYLT1,HMGA2,CCND3,FOLH1,ECE1,STK32A,CREM,LYPLA1,MBP,CWC27,PLCE1,TGFA,IL17RA,HIP1,CRIM1,XPNPEP1,FUT9,PRR5L,GXYLT2,VPS37A,GSR,CAPN5,MSRA,FBXO32,LDLRAD4,EGFLAM,CNTN1,TARS3,FKBP5,MTHFD1L,SNX3,NAA35,CEPT1,BRCA2,DISC1,GALNT13,DNER,BLM,ASB7,NRK,SLC10A7,MAGI3,ADCY10,BMP2,RC3H2,MYLK4,TRAK1,WDR26,CDC42BPB,DSE,VRK1,RANBP9,TTR,TPGS2,BMP2K,RNF38,PGPEP1,RELN,HMGB1,GNAQ,FGF9,SH3BP5,UST,CPAMD8,TRAF3,GEMIN5,DSTYK,UIMC1,B4GALT6,GLI3,SMARCC1,SNX6,CNKSR3,CASP5,IDE,CUL1,DAW1,NEK10,RRBP1,MOB1B,PIGN,ATF2,CYLD,UMODL1,MAPK8IP1,NELL1,ME2,NEU3,MRPL13,KITLG,ZZEF1,CAMTA1,UBR1,SMPDL3A,MAP4K3,HS3ST4,RCAN1,TADA2A,DAB1,MED27,RB1CC1,MYO3A,UBE2E1,PTPRE,PRKN,MTMR2,SPSB1,CDC42BPA,MAPK10,PNPLA7,ZNF541,FBXO3,GRIN2A,WSB1,USP43,TRPM6,PRKCH,HUNK,TG,IL6R,PEPD,ALS2,CPVL,ACO1,CNOT6L,MKNK1,SNX25,SLC4A4,PTPRB,AOPEP,COPS8,TSPAN33,ST8SIA1,USP7,PSMA1,ENPP3,HAAO,FAH,MOK,RALB,FAR1,ROCK1,LYN,VCAM1,SEL1L,CTSB,EIF2B3,SLC44A2,GSTA3,SUMO3,DTX1,BZW1,PIWIL3,ADA2,CHKA,MMP16,FANCL,BANP,RNF152,OTUD7A,INSR,CUL5,YTHDF3</i> |

|            |                             |                      |                                                                                                                                                                                                                                                                                                                                                                                                                                                                                                                                                                                                                                                                                                                                                                                                                                                                                                                                                                                                                                                                                                                                                                                                                                                                                                                                                                                                                                                                                                                                                                                                                                                                                                                                                                                                                                                                                                                                                                                                                                                                                                                                                                                                                                                                                                                                                                                                                                                                                                                                                                                                                                                                                                                                                                                                                                                                                                                           |
|------------|-----------------------------|----------------------|---------------------------------------------------------------------------------------------------------------------------------------------------------------------------------------------------------------------------------------------------------------------------------------------------------------------------------------------------------------------------------------------------------------------------------------------------------------------------------------------------------------------------------------------------------------------------------------------------------------------------------------------------------------------------------------------------------------------------------------------------------------------------------------------------------------------------------------------------------------------------------------------------------------------------------------------------------------------------------------------------------------------------------------------------------------------------------------------------------------------------------------------------------------------------------------------------------------------------------------------------------------------------------------------------------------------------------------------------------------------------------------------------------------------------------------------------------------------------------------------------------------------------------------------------------------------------------------------------------------------------------------------------------------------------------------------------------------------------------------------------------------------------------------------------------------------------------------------------------------------------------------------------------------------------------------------------------------------------------------------------------------------------------------------------------------------------------------------------------------------------------------------------------------------------------------------------------------------------------------------------------------------------------------------------------------------------------------------------------------------------------------------------------------------------------------------------------------------------------------------------------------------------------------------------------------------------------------------------------------------------------------------------------------------------------------------------------------------------------------------------------------------------------------------------------------------------------------------------------------------------------------------------------------------------|
|            |                             |                      | <p>,NEK6,HECTD1,SLC52A1,HDAC11,LYPLAL1,SUMO2,ADAMTS19,DPYD,ARFGEF1,SNAI2,ASH1L,BID,SIAH2,PIGK,OSBPL10,PGAP4,TRABD2B,UFD1,ERN2,MBTPS2,TRIM58,ZDHHC17,NSD2,CER S3,PTAR1,CARD10,LTN1,CTIF,SAMHD1,ENPP1,ENTPD5,MOCS2,RASGRP1,SNX9,PAMR1,ANAPC1,UCK2,CSNK2A1,BMP5,CSF1,PIL6,EOGT,SERPINB9,CTDP1,PRKG1,HS6ST3,ASB4,GRIN2B,FANCB,CLNS1A,CNMD,SMAD5,CELF4,ABCG1,MARCHF11,DCUN1D4,PRAME,KLHL7,PSAP,LPGAT1,PSMA5,MED1,ATG4B,CDC14B,KDM6A,IL33,GPRC5C,ROR2,CFH,PPP2R2A,NPL,KL,BANK1,CSDE1,HGD,IL10,SFPQ,PTH,PRKAA2,CSF2RB,GLYATL1,RNF182,LARP6,PHF20L1,PLA2G4A,IQGA1,RPS12,CAMLG,ANP32B,YBX3,AIMP1,THNSL2,NRXN1,PCID2,HIPK1,FRY,CYP4F22,FICD,CENPE,NGDN,ELOC,TWIST1,AKT3,ALKAL2,JAK2,ADAM28,MPPE1,BPNT1,MADD,PATL1,PRSS2,CREBBP,MELTF,TNKS,SIAH3,UFL1,ADAMTS5,NFKBIA,PRKCB,FBXW2,GOT2,MIPEP,OVCH1,ZC3H15,ST6GAL2,RTRAF,BRD4,SMPD4,NEDD9,NRBP1,IARS2,CLCA4,DGLUCY,NOXRRED1,ASS1,CNDP2,ADCY9,MAST2,HPSE2,ERLIN2,PCMTD2,ZBTB49,EXT2,AGO1,PDP2,GID8,SDS,BRMS1L,NDFIP2,MAP2K6,MARCHF6,MTPN,ABI1,CEMIP,IMPACT,CBLIF,CCBE1,PARK7,ADAMTS18,MAPK8,OAZ2,EIF3F,PPME1,FBXL17,UBL7,UBE2J2,MTF2,NCAPG2,ASB2,MYOCD,DHTKD1,CYFIP2,UBE2QL1,ACACA,ASCC2,ST8SIA4,NDUFA10,MEF2C,ADGRB1,WNT7A,MAP3K5,NDFIP1,MAP3K4,TRIM43B,SERPINI2,PRDM13,TRIM43,SUMF1,MAGEL2,PKN2,PDE2A,RAB38,DBF4B,FBXW8,SDCBP,SPPL2B,NSMCE1,PASK,MLLT1,NCK1,FLVCR1,FGR,CDCA8,PPP2R3A,TRIM23,ATP6V1B2,TOP1,TINAG,C2,RNF8,EPHA4,MECOM,NTRK2,ACSM2A,ADAMTS9,OCLN,FBXO31,EXTL3,TRPM7,PRKAB1,IREB2,MVB12B,HS6ST1,PTK2,MARK4,CDH5,CD5L,TPH2,APOL2,APIP,CYFIP1,UBE3A,APOL1,SEMA4D,SERPINB10,ZBTB20,RUNX1,KIRREL1,AMFR,CTSE,SLC26A2,POMT2,NOS1AP,MTTP,DPY19L2,TPT E,PDCL3,SRP9,CCDC88A,UBAP1L,GALNT18,HKDC1,ADAMTS16,TNFSF11,FYN,BUB1,KDM5A,DPY19L1,PPM1F,SDE2,UHRF2,HDAC2,SLF1,SH2D3C,PSME3IP1,DOCK3,TRNAU1AP,NCS1,GALNT17,ATP5PF,MTMR7,ZFYVE28,MAPK9,PABPC1,STT3A,SLC39A8,RO R1,SLC16A9,GALNT2,FUT8,TET1,ASB3,HECW2,OVCH2,SEL1L2,FBXL20,EPHB1,ZDHHC18,GRM5,GDAP1L1,SPOP,LPS6KA5,PTPRG,PID1,NRP1,MIDEAS,PRKCA,MRPL58,COX10,ATPSCKMT,RNF215,USP24,FHIT,ITGA1,PCCA,CROT,RNF138,RC3H1,POR,EF L1,ZNF738,SUPT3H,BCR,TUT4,SNRK,TM9SF2,SENPA8,USP49,ELP2,FBLN1,STK36,RAG1,DNPEP,BMPER,DPP6,MACROH2A1,EPHB2,CSNK1G1,BCL2L13,RNF11,CD38,DPH6,PPIL2,PRSS51,CDK14,MET,SPPL3,DLG2,CAMK1G,IBA57,SERPINB2,ATG5,USP32,MAGI2,UNK,ADAM29,MYB,KALRN,SLC1A2,CHST3,LAMA1,MFHAS1,SERPINB7,CPQ,TRIM9,DHX29,BMP7,CHIT1,TMPRSS15,TNF AIP8,RNF217,PRSS23,BTD,AK3,KMT2C,DDX6,PDGFC,ELOVL7,ABL2,MMP26,MRPL37,BACE2,NECAB1,EYA1,TTLN1,SLIT2,PARP8,CMPK1,TMPRSS3,CNOT7,ESCO1,ERBB4,SERPINB11,GSAP,T RHDE,ROBO1,SAMD4A,PRKCQ,ANTXR1,MGMT,AK9,NOS1,SLC6A3,GLDC,PRR16,EFNA5,NSD1,EHMT1,USP31,KDM4B,LOXL2,PRLR,PIGB,AGO3,HTT,LARS2,ZDHHC11B,CAMK1D,PIK3R3,MACROD2,CDKAL1,AK2,FER,EYA2,OSBPL5,A2M,CHFR,PCMT1,AUH,OARD1,SPOCK3,ROCK2,PRDM1,RORA,ATAT1,NARS2,EIF4G3,PPP1CB,PKD1,PSMD2,PTPRQ,HERPUD1,NCOA6,TRIM2,COL4A3,WASHC1,PCSK2,BARD1,STK3,DEPTOR,PNPLA8,HNRNPU,LINC00240,RAB3GAP2,TULP4,IGF1R,PRKAG2,AKAP13,MORC3,DNM1L</p> |
| GO:2000145 | regulation of cell motility | 7.679421596483845e-8 | <p>MTOR,PLCB1,TAF A5,DLC1,RIPOR2,RDX,BCL2,SPRED1,CARMIL1,MCTP1,RIN2,ANO6,APC,CRKL,PTPRJ,DOCK10,EGFR,ANGPT1,MACF1,SCAI,NTRK3,C5,PHACTR1,FLT1,PRKD1,PAK1,RAPGEF2,ARSB,ONECUT1,LDB2,CCL28,ADAM10,HDAC9,IL1R1,APP,MTUS1,DOCK8,MAPRE2,SEMA5A,VCL,NTF3,SLC8A1,PTPRR,SRGAP2C,SRGAP2B,KANK1,MAP4K4,CTNNA2,PAK3,DUSP22,MAPK1,MGAT5,PDGFD,NRG3,NIPBL,LIMCH1,TPM1,NF2,CTNNA1,TIAM1,PTPRK,SEMA3C,NAV3,AGO2,IL34,BCAS3,SYNE2,BBS2,SEMA6D,TNR,DOCK4,PTPRT,ABL1,HDAC4,FGF10,NRG1,PRKCE,EGF,PLXNA2,ARHGEF7,ATP8A1,SEMA3E,GCSAML,STK10,EMILIN2,DOCK5,FUT9,PRR5L,TJP1,LDLRAD4,IQSEC1,WDPCP,SEMA3A,BMP2,</p>                                                                                                                                                                                                                                                                                                                                                                                                                                                                                                                                                                                                                                                                                                                                                                                                                                                                                                                                                                                                                                                                                                                                                                                                                                                                                                                                                                                                                                                                                                                                                                                                                                                                                                                                                                                                                                                                                                                                                                                                                                                                                                                                                                                                                                                                                                                                 |

|            |                                             |                       |                                                                                                                                                                                                                                                                                                                                                                                                                                                                                                                                                                                                                                                                                                                                                                                                                                                                                                                                                                                                                                                                                                                                                                                                                                                                                                                                                                                                                                                                        |
|------------|---------------------------------------------|-----------------------|------------------------------------------------------------------------------------------------------------------------------------------------------------------------------------------------------------------------------------------------------------------------------------------------------------------------------------------------------------------------------------------------------------------------------------------------------------------------------------------------------------------------------------------------------------------------------------------------------------------------------------------------------------------------------------------------------------------------------------------------------------------------------------------------------------------------------------------------------------------------------------------------------------------------------------------------------------------------------------------------------------------------------------------------------------------------------------------------------------------------------------------------------------------------------------------------------------------------------------------------------------------------------------------------------------------------------------------------------------------------------------------------------------------------------------------------------------------------|
|            |                                             |                       | UNC5D, RIN3, SEMA3D, RELN, HMGB1, FGF9, DOCK1, SRGAP2, SLAMF1, ETS1, SMOC2, BBS4, KITLG, DACH1, IL6R, ROCK1, LYN, NTN1, INSR, YTHDF3, SNAI2, CD9, CARD10, JCAD, TWIST2, BMP5, CSF1, PRKG1, LAMA3, TNN, IL33, ROR2, ABHD2, TWIST1, AKT3, JAK2, ABCC8, NEDD9, ITGA6, MEOX2, BRMS1L, CEMIP, CCBE1, ITGA4, MYOC, D, MEF2C, ADGRB1, WNT7A, PKN2, SDCBP, NCK1, FGR, PPP2R3A, EPHA4, NUMB, ADAMTS9, FBXO31, PTK2, CDH5, DIAPH1, LAMB1, SEMA4D, JAM2, WNT5B, PPM1F, HDAC2, APELA, TET1, PTPRG, NRP1, PRKCA, MCC, BCR, FBLN1, RRAS2, BMPER, SRGAP3, MITF, EPHB2, MET, CDH13, MAGI2, FLRT2, LAMA1, BMP7, DLG5, ZMYND8, PDGFC, ABL2, SLIT2, ERBB4, ROBO1, FRMD5, NTNG1, CAMK1D, PIK3R3, FER, CCR2, STARD13, SPOCK3, SEMA4B, ROCK2, WASHC1, IGF1R, DNM1L                                                                                                                                                                                                                                                                                                                                                                                                                                                                                                                                                                                                                                                                                                                           |
| GO:0040012 | regulation of locomotion                    | 8.763117442391262e-8  | MTOR, PLCB1, TAF5, DLC1, RIPOR2, RDX, BCL2, ROBO2, SPRED1, CARMIL1, MCTP1, RIN2, ANO6, APC, DSCAM, CRKL, PTPRJ, DOCK10, EGFR, USP14, ANGPT1, MACF1, SCAI, NTRK3, C5, PHACTR1, FLT1, PRKD1, PAK1, RAPGEF2, ARSB, ONECUT1, LDB2, CCL28, ADAM10, HDAC9, IL1R1, APP, MTUS1, DOCK8, MAPRE2, SEMA5A, VCL, NTF3, SLC8A1, PTPRR, SRGAP2C, SRGAP2B, KANK1, MAP4K4, CTNNA2, PAK3, DUSP22, MAPK1, MGAT5, PDGFD, NRG3, NIPBL, LIMCH1, TPM1, NF2, CTNNA1, TIAM1, PTPRK, SEMA3C, NAV3, AGO2, IL34, BCAS3, SYNE2, BBS2, SEMA6D, TNR, DOCK4, PTPRT, ABL1, HDAC4, FGF10, NRG1, PRKCE, PTPRO, EGF, PTPN2, PLXNA2, ARHGEF7, ATP8A1, SEMA3E, GCSAML, STK10, EMILIN2, DOCK5, FUT9, PRR5L, TJP1, LDLRAD4, IQSEC1, WDPCP, SEMA3A, BMP2, UNC5D, RIN3, SEMA3D, RELN, HMGB1, FGF9, DOCK1, SRGAP2, SLAMF1, ETS1, SMOC2, BBS4, KITLG, DACH1, IL6R, ROCK1, LYN, NTN1, INSR, YTHDF3, SNAI2, CD9, CARD10, JCAD, TWIST2, BMP5, CSF1, PRKG1, LAMA3, TNN, IL33, ROR2, ABHD2, TWIST1, AKT3, JAK2, ABCC8, NEDD9, ITGA6, MEOX2, BRMS1L, CEMIP, CCBE1, ITGA4, MYOC, MEF2C, ADGRB1, WNT7A, PKN2, SDCBP, NCK1, FGR, PPP2R3A, EPHA4, NUMB, ADAMTS9, FBXO31, PTK2, CDH5, DIAPH1, LAMB1, SEMA4D, JAM2, WNT5B, PPM1F, HDAC2, APELA, TET1, GRM5, PTPRG, NRP1, PRKCA, MCC, BCR, FBLN1, RRAS2, BMPER, SRGAP3, MITF, EPHB2, MET, CDH13, MAGI2, FLRT2, LAMA1, BMP7, DLG5, ZMYND8, PDGFC, ABL2, SLIT2, ERBB4, ROBO1, FRMD5, NTNG1, CAMK1D, PIK3R3, FER, CCR2, STARD13, SPOCK3, SEMA4B, ROCK2, IL16, WASHC1, IGF1R, DNM1L |
| GO:0044087 | regulation of cellular component biogenesis | 9.411867144620245e-8  | MTOR, PTPRD, SVIL, DLC1, PTPRA, RIPOR2, RDX, RP1, STXBP1, RALA, IL1RAPL2, ROBO2, SDCCAG8, CDC42EP3, AUTS2, CARMIL1, RHPN2, NEGR1, GPC6, CNTNAP2, MAP4, APC, PLPPR5, ARHGAP24, PTPRJ, MACF1, NEK7, BCL11A, NTRK3, CRACD, SLC39A12, PAK1, EPHA7, RAPGEF2, ADGRB3, LDB2, SEPTIN9, TBCD, ATF7IP, APP, STAU2, VCL, ARHGAP44, SRGAP2C, KANK1, MAP4K4, PAK3, DNM3, PRKCZ, COBL, SENP6, DUSP22, YAP1, SPIDR, CORO2B, LIMCH1, FMN1, TPM1, NF2, AKAP9, SNX30, NAV3, DNAJC15, BCAS3, SYNE2, ABL1, HDAC4, PRKAA1, LRFN5, RAP1A, MYO10, GRID2, PEAK1, NRG1, CLIP1, ABCB7, MUSK, SETDB2, PRKCE, STXBP6, MTMR3, ARHGEF7, AMBRA1, C10ORF90, TMOD2, LINGO2, VPS41, PLCE1, TJP1, LDLRAD4, NHP4, PDLIM5, WDPCP, RESF1, HMGB1, MDM1, UNC13B, RAP1GAP, KIF15, MAP2, FARP1, CYLD, BBS4, PRKN, TBX20, PRKCH, CNOT6L, KANK4, RALB, ROCK1, ARHGAP28, TENM2, NTN1, BMF, COLQ, ARFGF1, PDE4DIP, SNAI2, BID, TRABD2B, SH3GLB1, SNX9, ACTR2, CLSTN2, PRKAA2, VASP, MORC2, NRXN1, ANLN, GAP43, SAR1A, MTPCN, IMPACT, PARK7, CEP120, CYFIP2, MEF2C, ADGRB1, WNT7A, SDCBP, NECN1, NCK1, NTRK2, IL1RAPL1, OCLN, PTK2, MARK4, CDH5, MPP7, FEZ2, CYFIP1, SEMA4D, KIRREL1, SAXO1, ASAP1, CCDC88A, ADAMTS16, PPM1F, ADGRL2, SLF1, MAPK9, EPHB1, SPTB, NRP1, FCHSD2, PRKCA, EPHB2, TOGARAM1, SACS, AKAIN1, MET, CDH17, ATG5, FLRT2, BMP7, DLG5, FHOD3, SLIT2, SYNDIG1, ANTXR1, NLGN1, ASIC2, EFNA5, ESR1, HTT, FER, EPS8, ROCK2, STMP1, ATAT1, WASHC1, HNRNPU, RAB3GAP2                                      |
| GO:0007167 | enzyme-linked receptor protein signaling    | 1.0547889810093185e-7 | NOTCH2, BCAR3, PTPRD, ANKS1B, NLK, PLCB1, PTPRA, PRDM16, FBIN1, ZEB1, SPRED1, MYO1E, ALK, ERBIN, APC, CRKL, PTPRJ, EGFR, ANGPT1, NEDD4, NTRK3, FLT1, NEO1, PRKD1, PAK1, EPHA7, RAPGEF2, LRP2, RUNX2, FGF12, ONECUT1, BTBD11, GHR, COL4A2, NTF3, PTPRR, KANK1, BMPR1B, PCSK6, ARNT, PAK3, PRKCZ, GRB10, DUSP22, PPM1L, SHC4, MAPK1, PDGFD, NRG3, UBE2O, GFRA1, CHN1, EFE                                                                                                                                                                                                                                                                                                                                                                                                                                                                                                                                                                                                                                                                                                                                                                                                                                                                                                                                                                                                                                                                                                |

|            |                                  |                       |                                                                                                                                                                                                                                                                                                                                                                                                                                                                                                                                                                                                                                                                                                                                                                                                                                                                                                                                                                                                                                                                                                                                                                                                                                                                                                                                                                                                                                                                                                                                                                                                                                                                                                                                                                                                                                                                                                                                                                                                                                                                                                                                                                                                                                                                                                                                                                                                                                                                                                                                             |
|------------|----------------------------------|-----------------------|---------------------------------------------------------------------------------------------------------------------------------------------------------------------------------------------------------------------------------------------------------------------------------------------------------------------------------------------------------------------------------------------------------------------------------------------------------------------------------------------------------------------------------------------------------------------------------------------------------------------------------------------------------------------------------------------------------------------------------------------------------------------------------------------------------------------------------------------------------------------------------------------------------------------------------------------------------------------------------------------------------------------------------------------------------------------------------------------------------------------------------------------------------------------------------------------------------------------------------------------------------------------------------------------------------------------------------------------------------------------------------------------------------------------------------------------------------------------------------------------------------------------------------------------------------------------------------------------------------------------------------------------------------------------------------------------------------------------------------------------------------------------------------------------------------------------------------------------------------------------------------------------------------------------------------------------------------------------------------------------------------------------------------------------------------------------------------------------------------------------------------------------------------------------------------------------------------------------------------------------------------------------------------------------------------------------------------------------------------------------------------------------------------------------------------------------------------------------------------------------------------------------------------------------|
|            | pathway                          |                       | MP1, ITGB8, HIVEP1, PPARA, ADAMTS3, TIAM1, PTPRK, TMEM108, BLK, MBD5, PTPRT, ABL1, PTPN12, PRKAA1, FGF10, LATS2, NRG1, MUSK, FBN2, EGF, TRIO, EXT1, LNPEP, SPRED2, PTPN2, ARHGEF7, LTBP1, ZFYVE9, EPHA6, EPN2, GFRA2, CCND3, PLCE1, TGFA, HIP1, CRIM1, VAV1, LDLRAD4, BMP2, PSG9, SOGA1, LEMD3, FGF9, ZNF106, DSTYK, FAM83B, SMARCC1, SNX6, SMOC2, IDE, GAREM1, ATF2, RGMB, NEU3, SLC30A10, PTPRE, TBX20, NGEF, ARID5B, SNX25, ARHGEF28, LYN, OVOL2, INSR, CUL5, NREP, ZDHHC17, JCAD, ENPP1, BMP5, CSF1, GHRH, GRB14, SMAD5, ROR2, KL, SOSTDC1, IQGAP1, CAMELG, NRXN1, PBLD, PEG10, JAK2, FSTL1, SVEP1, CREBBP, PRKCB, NEDD9, CIDEA, BRMS1L, ABI1, CCBE1, MYOCD, CYFIP2, RBPM5, SDCBP, NCK1, FGR, EPHA4, NTRK2, IL17RD, MVB12B, PTK2, CDH5, CYFIP1, FAT4, CNKSR1, CCDC88A, FYN, HDAC2, DOK5, ZFYVE28, ROR1, FUT8, TET1, ITGA8, EPHB1, PTPRG, PID1, NRP1, SAMD12, ITGA1, KIF16B, BMPER, EPHB2, MET, CDH13, STXB4, MAGI2, FLRT2, KALRN, BMP7, PDGFC, ERBB4, ROBO1, PRKCQ, EFNA5, PRLR, PIK3R3, FER, DMRT1, COL4A3, FSTL4, ZNF423, IGF1R                                                                                                                                                                                                                                                                                                                                                                                                                                                                                                                                                                                                                                                                                                                                                                                                                                                                                                                                                                                                                                                                                                                                                                                                                                                                                                                                                                                                                                                                                                       |
| GO:0009888 | tissue development               | 1.562805956929967e-7  | NOTCH2, MTOR, SGCD, BNC2, NEBL, MYO9A, FTO, PLCB1, SVIL, ZFP M2, TENM4, DLC1, ZDHHC21, RIPOR2, PDE4D, RDX, RALA, BCL2, ALDH1A2, ROBO2, ZEB1, AKR1C3, RARB, SPRED1, MYO1E, USH2A, FOXJ2, ANO6, MLLT3, GPC6, SOX5, SETD2, ARHGAP24, EGFR, RFX3, PRKACB, RNF220, SOX6, CECR2, CHSY1, RXFP1, EDAR, PAK1, EPHA7, RAPGEF2, LRP2, DEUP1, RUNX2, CPS1, ONECUT1, TMEM38B, PRICKLE2, SLC24A3, LDB2, GHR, LUZP1, COL4A2, SSBP3, HDAC9, TMC1, SEMA5A, VCL, SLC8A1, BMPR1B, AKAP6, IFT57, COL27A1, MRTFA, COBL, EBF2, YAP1, RIPK4, MAPK1, PDGFD, ZNRF3, LCE1F, MYLK3, FMN1, PAFAH1B1, EFEMP1, ITGB8, TPM1, NF2, RBFOX1, BIRC6, KLIF15, PPARA, NFIB, MRTFB, NR5A2, TIAM1, KAZN, SEMA3C, SLC24A4, ALPK2, JARID2, ADGRV1, RYR2, BBS2, WNT9B, RANBP3L, SEMA6D, COL22A1, CXADR, ATRX, XIRP2, ABL1, HDAC4, PRKAA1, RAP1A, FGF10, TGM1, LATS2, NRG1, AP3B1, ZBTB16, SETDB2, PGM5, FBN2, CD44, PTPRO, EGF, ALPK3, EXT1, SPRED2, PLXNA2, AMBRA1, CNM4, SEMA3E, ALPL, FHL2, LUC7L, EVC, SGCZ, MYLK2, HMG2, BCL11B, ECE1, TRPS1, TJP1, LDLRAD4, EGFLAM, MTHFD1L, PDLIM5, BRCA2, DNER, WDPCP, SEMA3A, BMP2, PTCD2, BMP2K, SEMA3D, FGF9, TDRD7, ESRP1, ETS2, PLS1, GLI3, SLC9A4, LAMC1, ATF2, UMODL1, BBS4, LAMC3, HIVEP3, COL5A1, CFTR, NELL1, KITLG, RCAN1, SELENON, TBX20, PCDH15, ARID5B, CDH23, PRKCH, IL6R, TFPD1, LC E3B, TOX, MESD, YIPF6, ROCK1, CTSB, OVOL2, NTN1, HOXC13, INSR, DMBT1, HECTD1, SHROOM3, SNAI2, ASH1L, HOXC4, RXRG, FLNB, CERS3, KRT6B, ENPP1, BMP5, WDR72, CSF1, KRT25, CTDP1, LAMA3, CNMD, SMAD5, SLC40A1, MYCL, TNN, PSAP, MED1, ATG4B, KDM6A, ATRN, AJAP1, ROR2, KL, FAT1, IL10, PTH, SOSTDC1, VASP, IQGAP1, YBX3, TWIST1, JAK2, FSTL1, SVEP1, CELSR2, GORAB, PCNA, ANXA4, ALX4, USH1C, ITGA6, ATP2B1, OTOP1, EXT2, KRT6A, MEOX2, GRXCR1, STAT1, MTPN, ABI1, MYO18B, ITGA4, FBXL17, CSMD1, ASB2, MYOCD, KRT85, MEF2C, RXRA, WNT7A, PDE2A, FBXW8, SDCBP, NECTIN1, FGR, PPP2R3A, SPRR2D, LCE3D, EPHA4, EMP1, FNDC3A, ADAMTS9, WNT2B, TNNI1, POSTN, MEGF10, IL17RD, CDH5, ANKRD6, ARHGAP12, LAMB1, PCDH8, SEMA4D, FRMD6, FAT4, RUNX1, AKR1B1, WNT5B, SORBS2, NSUN2, ADAMTS16, TNFSF11, ARL13B, HYDIN, HDAC2, COL18A1, COL19A1, APELA, ROR1, CDH2, ITGA8, NTNG4, EPHB1, NRP1, POR, BCR, KIF16B, B9D1, BMPER, MACROH2A1, SGCG, MET, ATG5, NRAP, MAGI2, GNAS, LAMA1, GREB1L, SERPINB7, ATRNL1, BMP7, ASTN2, DLG5, BPTF, EYA1, FHOD3, SLIT2, EXOC4, ERBB4, ROBO1, PBX1, MYH15, SIPA1L3, MGMT, ESR1, NTNG1, LOXL2, PRLR, FOXB1, RAD51B, FER, EYA2, STARD13, SEMA4B, ROCK2, PRDM1, DMRT1, HSPG2, PTPRQ, STK3, HNRNPU, APCDD1, GLI2, THRB, AKAP13 |
| GO:0018193 | peptidyl-amino acid modification | 1.8761858733421855e-7 | BCAR3, MTOR, ULK2, NLK, AGBL1, ZDHHC21, PDE4D, BCL2, EPC2, SPRED1, GALNT1, ALK, AUTS2, MLLT3, EGLN3, MAP3K9, SETD2, PTPRJ, KDM4C, EGFR, ANGPT1, NSMCE2, BCL11A, PTPN4, NTRK3, TUSC3, FLT1, PRKD1, PAK1, EPHA7, NCOA7, SMYD3, RPTOR, GHR, HDAC9, APP, RPS6KA2, SAMS1, DCLK1, NTF3, AURKA, ARNT, TLL7, DIP2B, RANBP2, TRPC5, HHAT, PRKCZ, DIP2A, PHF19, SENP6, DUSP22, MAPK1, MGAT5, KMT2E, PDGFD, GFRA1, GALNT16, STK38, KANSL1                                                                                                                                                                                                                                                                                                                                                                                                                                                                                                                                                                                                                                                                                                                                                                                                                                                                                                                                                                                                                                                                                                                                                                                                                                                                                                                                                                                                                                                                                                                                                                                                                                                                                                                                                                                                                                                                                                                                                                                                                                                                                                              |



|            |                                |                       |                                                                                                                                                                                                                                                                                                                                                                                                                                                                                                                                                                                                                                                                                                                                                                                                                                                                                                                                                                                                                                                                                                                                                                                                                                                                                                                                                                                                                                                                                                                                                                            |
|------------|--------------------------------|-----------------------|----------------------------------------------------------------------------------------------------------------------------------------------------------------------------------------------------------------------------------------------------------------------------------------------------------------------------------------------------------------------------------------------------------------------------------------------------------------------------------------------------------------------------------------------------------------------------------------------------------------------------------------------------------------------------------------------------------------------------------------------------------------------------------------------------------------------------------------------------------------------------------------------------------------------------------------------------------------------------------------------------------------------------------------------------------------------------------------------------------------------------------------------------------------------------------------------------------------------------------------------------------------------------------------------------------------------------------------------------------------------------------------------------------------------------------------------------------------------------------------------------------------------------------------------------------------------------|
|            |                                |                       | , EFEMP1, TLK1, NF2, ZDHHC14, AKAP9, KLF15, STK32B, JARID2, IL34, MELK, PARD3, MAPKAP1, PIAS1, BLK, ATRX, ABL1, HDAC4, OXR1, SLC1A1, PRKAA1, TTLL5, MAST4, CAMK4, FGF10, PEAK1, LAT S2, NRG1, MUSK, GALNTL6, SETDB2, PRKCE, METAP1D, CD44, EGF, SPRED2, RPS6KA3, PTPN2, STK38L, PRMT8, HTR2A, MARK2, EPHA6, HIPK3, CLSPN, NOS2, MYLK2, FOLH1, STK32A, CWC27, TGFA, EGF LAM, CNTN1, FKBP5, NAA35, BRCA2, GALNT13, CDC42BPB, VRK1, TPGS2, RELN, SH3BP5, DSTYK, SNX6, CNKSR3, ATF2, KITLG, TADA2A, CDC42BPA, PRKCH, IL6R, MKNK1, ROCK1, LYN, SUMO3, CHKA, INSR, NEK6, SUMO2, SNAI2, ASH1L, ZDHHC17, NSD2, CSNK2A1, PPIL6, EOGT, CLNS1A, KDM6A, ROR2, BANK1, PRKAA2, PHF20L1, NRXN1, HIPK1, TWIST1, AKT3, ALKAL2, JAK2, CREBBP, TNKS, PRKCB, BRD4, NEDD9, MAST2, MAP2K6, ABI1, CEMIP, PARK7, MAPK8, MTF2, NCAPG2, MYOCD, PKN2, NSMCE1, MLLT1, NCK1, FGR, TOP1, EPHA4, NTRK2, PTK2, SEMA4D, NOS1AP, DPY19L2, PDCL3, FYN, DPY19L1, PPM1F, UHRF2, HDAC2, SLF1, SH2D3C, DOCK3, ZFYVE28, MAPK9, STT3A, ROR1, GALNT2, FUT8, EPHB1, ZDHHC18, GRM5, RPS6KA5, NRP1, PRKCA, ATPCKMT, POR, SUPT3H, BCR, MACROH2A1, EPHB2, CSNK1G1, DPH6, PPIL2, MET, CAMK1G, ATG5, MYB, BMP7, KMT2C, PDGFC, ABL2, EYA1, TTLL11, CNOT7, ESCO1, ERBB4, PRKCQ, NOS1, EFN A5, NSD1, EHMT1, KDM4B, LOXL2, PRLR, ZDHHC11B, CAMK1D, FER, SPOCK3, ROCK2, PRDM1, ATAT1, NCOA6, IGF1R, PRKAG2, MORC3                                                                                                                                                                                                                |
| GO:0072359 | circulatory system development | 2.0957571029829237e-7 | NOTCH2, MTOR, SGCD, IMMP2L, NEBL, TAF A5, ZFPM2, TENM4, DLC1, ODAD2, ALDH1A2, FBN1, CHRNA7, ROBO2, RARB, SPRED1, ENPEP, MYO1E, MINAR1, FOXJ2, RIN2, CRKL, SETD2, ARHGAP24, EGFR, ANGPT1, SOX6, NTRK3, C5, FLT1, ADAMTS6, SLC39A12, PRKD1, RAPGEF2, LRP2, ADGRB3, FGF12, LUZP1, COL4A2, ADAM10, HDAC9, RPS6KA2, CACNA1C, SEMA5A, SLC8A1, THSD7A, AKAP6, IFT57, CALD1, YAP1, MAPK1, PLG, PDGFD, NIPBL, MYLK3, ITGB8, TPM1, PPARA, SEMA3C, AGO2, ALPK2, DNAH11, JARID2, CPE, ANK2, BCAS3, RYR2, ANKS6, LDB3, COL22A1, CXADR, XIRP2, ABL1, SLC1A1, DNAH5, RAP1A, FGF10, NRG1, SETDB2, NXN, EGF, ALPK3, EXT1, SEMA3E, FH L2, ANKRD17, EPN2, MNAT1, SGCZ, ADAM12, MYLK2, EMILIN2, HMG A2, ECE1, PLCE1, TGFA, TJP1, PDLIM5, WDCP, BMP2, PTC2, FGF9, NFATC2, ETS1, GLI3, SMOC2, DAW1, ATF2, BBS4, COL5A1, GTF2I, RB1CC1, TBX20, IL6R, PTPRB, VAV3, ADGRG6, ROCK1, VCAM1, OVL2, INSR, HECTD1, SNAI2, RXRG, NSD2, CARD10, JCAD, BMP5, CTD1, ASB4, CNMD, DHRS3, SMAD5, VSTM4, TNN, MED1, KDM6A, IL10, ANP32B, AIMP1, NRXN1, HIPK1, CACYBP, TWIST1, AKT3, SVEP1, PCNA, PRKCB, ABCC8, AGO1, MEOX2, STAT1, MYO18B, CCBE1, ASB2, MYOCD, MEF2C, ADGRB1, WNT7A, PDE2A, FBXW8, FLVCR1, NTRK2, ADAMTS9, TNNT1, HS6ST1, PTK2, CDH5, FAT4, AP2B1, RUNX1, SO RBS2, PDCL3, ARL13B, COL18A1, APELA, CDH2, EPHB1, NRP1, PRKCA, NRXN3, MB, B9D1, BMPER, EPHB2, SGCG, CDH13, ATG5, NRAP, F LRT2, LAMA1, GREB1L, SERPINB7, BMP7, ADGRF5, EYA1, FHOD3, S LIT2, ERBB4, ROBO1, ANTXR1, SLIT3, LOXL2, PIK3R3, CCR2, STA RD13, ROCK2, PRDM1, RORA, HSPG2, NCOA6, COL4A3, STK3, HNRNP U, IGF1R, GLI2, AKAP13 |
| GO:0099173 | postsynaptic organization      | 2.1009975716027933e-7 | PTPRD, LRFN2, GPHN, CHRNA7, CRKL, DOCK10, NTRK3, EPHA7, ADAM10, STAU2, ARHGAP44, PAK3, DNM3, DIP2A, PAF A1B1, CNKSR2, TMEM108, TANC1, GRID2, MUSK, DGKB, CTNND2, ABHD17C, PDLIM5, RELN, FARP1, MTMR2, NGEF, FRMPD4, SHANK2, MESD, INSR, COLQ, TANC2, GRIN2B, ACTR2, NRXN1, NEDD9, GAP43, WNT7A, EPHA4, I L1RAPL1, SHISA6, UBE3A, NOS1AP, FYN, CDH2, EPHB1, NRP1, EPH B2, PPFIA2, KALRN, NLGN1, IGF1R                                                                                                                                                                                                                                                                                                                                                                                                                                                                                                                                                                                                                                                                                                                                                                                                                                                                                                                                                                                                                                                                                                                                                                       |
| GO:0051641 | cellular localization          | 2.2305128025329082e-7 | NSG1, EXOC1L, WWC1, ABCA13, IMMP2L, TRAPPC9, LONP2, UNC13C, MX2, CLTCL1, SNAP25-AS1, DPP10, ZDHHC21, ITPR2, RIPOR2, PDE4D, RDX, STXB1, ERC1, RALA, EPS15L1, BCL2, MYO5A, FBN1, GPHN, COG5, GPR158, RIMS1, PIK3C3, SPIRE1, CNTLN, EXOC6B, MYO1E, TRAPPC8, USH2A, CEP192, RIMS2, MCTP1, ERBIN, FCHO2, CACNG2, GPC6, CNTNAP2, MAP4, APC, MYO5C, CRKL, ILDR2, SETD2, TANGO6, TNIK, EGFR, RFX3, DENND1A, ANGPT1, MACF1, DOCK2, NEDD4, GNPTAB, CRB1, BTBD9, ZFAND6, DNAJC13, RABEP1, DGKI, C12ORF4, NUP214, TOM1L2, CEP128, PRKD1, GRAMD1B, RAPGEF2, LRP2, ARSB, TMEM38B, AGK, RANBP17, UBE2L3, PTPRN2, SYN2, SMYD3, HERC2, SEPTIN9, EPB4                                                                                                                                                                                                                                                                                                                                                                                                                                                                                                                                                                                                                                                                                                                                                                                                                                                                                                                                        |

|            |                             |                      |                                                                                                                                                                                                                                                                                                                                                                                                                                                                                                                                                                                                                                                                                                                                                                                                                                                                                                                                                                                                                                                                                                                                                                                                                                                                                                                                                                                                                                                                                                                                                                                                                                                                                                                                                                                                                                                                                                                                                                                                                                                                                                                                                                                                                                                                                                                                                                                                                                                                                                                                                                                                                                                                                                                                                                                                                                                                                                                                                                                                                                                                                                                                                                                                                                                                                                                                                                                                                                                                                                                                                                                                                                                                                                                                            |
|------------|-----------------------------|----------------------|--------------------------------------------------------------------------------------------------------------------------------------------------------------------------------------------------------------------------------------------------------------------------------------------------------------------------------------------------------------------------------------------------------------------------------------------------------------------------------------------------------------------------------------------------------------------------------------------------------------------------------------------------------------------------------------------------------------------------------------------------------------------------------------------------------------------------------------------------------------------------------------------------------------------------------------------------------------------------------------------------------------------------------------------------------------------------------------------------------------------------------------------------------------------------------------------------------------------------------------------------------------------------------------------------------------------------------------------------------------------------------------------------------------------------------------------------------------------------------------------------------------------------------------------------------------------------------------------------------------------------------------------------------------------------------------------------------------------------------------------------------------------------------------------------------------------------------------------------------------------------------------------------------------------------------------------------------------------------------------------------------------------------------------------------------------------------------------------------------------------------------------------------------------------------------------------------------------------------------------------------------------------------------------------------------------------------------------------------------------------------------------------------------------------------------------------------------------------------------------------------------------------------------------------------------------------------------------------------------------------------------------------------------------------------------------------------------------------------------------------------------------------------------------------------------------------------------------------------------------------------------------------------------------------------------------------------------------------------------------------------------------------------------------------------------------------------------------------------------------------------------------------------------------------------------------------------------------------------------------------------------------------------------------------------------------------------------------------------------------------------------------------------------------------------------------------------------------------------------------------------------------------------------------------------------------------------------------------------------------------------------------------------------------------------------------------------------------------------------------------|
|            |                             |                      | <p> 1L3, KIF4A, NEDD4L, ADAM10, APP, CACNA1C, CACNB2, DCLK1, STAU2, MAPRE2, SYT1, VCL, ARHGAP44, NDUFAF2, CD2AP, AURKA, PYGO1, SLC8A1, ABCD2, FMN2, AKAP6, RAB8B, RFTN1, RANBP2, RAP1GDS1, KICS2, ERC2, DNM3, CUBN, SCP2, SYN3, IFT57, PRKCZ, RYR3, MCPH1, RAB27B, CNST, YAP1, SEM1, VPS35L, MAPK1, CADPS2, ABCD3, RABGAP1L, SGTB, ADAM22, COPB1, UBE2O, ANKFY1, SYCP1, NIPBL, SLC16A1, SPIDR, IPO11, CORO2B, PAFAH1B1, TM7SF3, STON2, VPS13D, TLK1, NF2, ZDHHC14, CTNNA1, AKAP9, SNX30, SYNJ1, RSR1, PTPRK, PARD3B, VPS13C, TMEM108, DNAH11, JARID2, RAB22A, DNAJC15, AMPH, CPE, ANK2, ADGRV1, BCAS3, RYR2, SYNE2, BBS2, RANBP3L, NKG7, NBEA, DUSP16, USP8, PARD3, TBC1D5, BLK, DST, ATRX, ABL1, SLC1A1, PRKAA1, FHIP1A, ANO4, CCDC91, EIPR1, DNAH5, NBAS, RAP1A, MYO10, GPC5, PLEKHA8, FGF10, GRID2, LATS2, NRG1, GSG1L, ASPM, AP3B1, SYNE1, ZBTB16, MUSK, SH3GL3, PRKCE, SLMAP, DENND4C, CEP83, FBN2, EGF, STXB6, PEX14, IFT43, SCG5, TRIM5, ATXN3, HTR2C, RIC3, CLEC16A, LTBP1, ZFYVE9, OPRM1, ABCC4, HTR2A, CYBRD1, STAC, TAF3, ABHD17C, MSH2, APBA2, MAIP1, TNPO3, NOS2, TTC7B, MDFIC, MYLK2, ANK3, COG2, VPS41, LYPLA1, TRAPPC11, ANKFN1, HIP1, PRR5L, VPS37A, EFR3A, TJP1, NPHP4, PACSIN2, SNX3, BHLHE40-AS1, BRCA2, DISC1, WDPCP, SLC10A7, LRP1B, STX12, ATP9A, TRAK1, EVI5, SCN11A, MSR1, VRK1, GNAI1, MYRIP, SLC15A5, RELN, NUDCD3, AP4E1, FGF9, POLR2M, MYOM1, UNC13B, TTC21B, PLS1, SNX8, SEC23B, NIN, CCDC186, GLI3, SNX6, PACS1, MCTP2, MAP2, DAWI1, PEX6, RRB1, ATF2, BBS4, KIAA0753, CFTR, KPNA1, CSE1L, DOP1B, TBC1D13, PHAF1, SELENON, NMD3, AKAP10, REPS1, PRKN, MTMR2, LYST, GRIN2A, JPH1, ATXN1, PRKCH, FRMD4A, ALS2, SNX25, FBLN5, KCNQ3, TSPAN33, LRBA, MAP7, USP7, MON2, MESD, ITS2, SYBU, YIPF6, MYO1D, SEC24D, ROCK1, LYN, SEL1L, SUMO3, SLC15A2, NTN1, RRAGD, BANP, CRACR2A, NPIP1, DMBT1, HECTD1, SHROOM3, XRCC4, COLQ, ARFGEF1, BID, PIGK, RPH3A, TANC2, UFD1, TRIM58, TOM1, ZDHHC17, NSD2, FYCO1, SH3GLB1, CARD10, TMED3, IFT81, RASGRP1, IGSF11, SNX9, WDR72, NUP37, BCL2L1, HCN1, SYNJ2, ABCG1, SLC40A1, FAM149B1, PSAP, MICALL2, MED1, ATG4B, PCNT, IL10, ACTR2, SFPQ, PRKAA2, NDC80, PACRG, MAP6, PLA2G4A, SCFD2, KIFC1, CAMLG, SREBF2, ANP32B, FYB2, NRXN1, PCID2, SNAP91, CENPE, JAK2, SLC1A7, RPF2, MPPE1, CELSR2, TNKS, ARL11, SIAH3, UFL1, NFKB1A, PRKCB, ABCC8, MIPEP, ANP32A, USH1C, NEDD9, NRBP1, MTCL1, GRIP1, TM9SF3, SAR1A, TRAPPC3, BBS9, EXOC1, HEPACAM, SLC6A1, NDFIP2, SHROOM2, RN7SL483P, SLC6A11, CEMIP, PARK7, MAPK8, ITGA4, OAZ2, BCAP29, UBE2J2, ADCYAP1R1, NDC1, TM9SF4, RAPGEF4, CEP120, ARL4C, MEF2C, WNT7A, NDFIP1, CHAMP1, MAGEL2, RAB38, SDCBP, NECTIN1, FLVCR1, FGR, CDCA8, TRIM23, SNAP29, INTS13, NUMB, ADAMTS9, RN7SL767P, OCLN, SHISA6, AKAP11, KTN1, IREB2, MVB12B, MARK4, CDH5, AP4S1, CLDN18, MPP7, DIAPH1, SCAMP1, CYFIP1, SCG3, FRMD6, AP2B1, HEATR5A, ICA1, MTPP, SRP9, CCDC88A, NSUN2, BICD1, FYN, PPM1F, ARL13B, XPO7, ODR4, SLF1, ALB, EHBP1, MAPK9, SLC39A8, ASB3, CDH2, ITGA8, FBXL20, GPR137B, ZDHHC18, TBC1D1, PID1, NR1P1, FCHSD2, IFT46, RNF215, SLC14A1, MCC, BCR, NRXN3, KIF16B, ARFGAP3, TM9SF2, NSG2, B9D1, BMPER, RABL2A, DPP6, MACROH2A1, EPHB2, CD38, MYO5B, RGP4, PPIL2, AKAIN1, DLG2, ATP6V0D2, PPFIA2, CDH13, STXB4, CACNG3, ATG5, MAGI2, VMP1, SLC1A2, GNAS, MFHAS1, NUP43, BMP7, ASTN2, DLG5, GAPVD1, TRAPPC10, DDX6, VPS13B, TRAPPC6B, EXOC4, FAM126A, KCNIP4, ERBB4, FAM3B, FAM126B, SYNDIG1, NUF2, RGP2, SAMM50, SORCS2, TRDN, NLGN1, NOS1, SLC6A3, ASIC2, EFNA5, GAS2L1, RAB27A, KIF13A, AP5M1, ESR1, DNAH9, IRAG2, HTT, ZDHHC11B, HLA-F, FER, EYA2, CCR2, OSBPL5, ANO2, AGAP1, ROCK2, TERB2, CDCA5, RAB31, HERPUD1, WASHC1, HOOK3, BARD1, STK3, ZNF423, HNRNP, VTI1A, CEP72, RAB3GAP2, CADPS, TANGO2, AKAP13, MORC3, SEPTIN6, DNML1 </p> |
| GO:1901888 | regulation of cell junction | 2.268446356211928e-7 | <p> PTPRD, DLC1, PTPRA, IL1RAPL2, ROBO2, NEGR1, GPC6, CNTNAP2, PTPRJ, MACF1, NTRK3, EPHA7, RAPGEF2, ADGRB3, APP, STAU2, VCL, MAP4K4, DUSP22, LIMCH1, FMN1, BCAS3, ABL1, LRFN5, RAP1A, GRID2, PEAK1, MUSK, LINGO2, TJP1, NPHP4, PDLIM5, WDPCP, FAR </p>                                                                                                                                                                                                                                                                                                                                                                                                                                                                                                                                                                                                                                                                                                                                                                                                                                                                                                                                                                                                                                                                                                                                                                                                                                                                                                                                                                                                                                                                                                                                                                                                                                                                                                                                                                                                                                                                                                                                                                                                                                                                                                                                                                                                                                                                                                                                                                                                                                                                                                                                                                                                                                                                                                                                                                                                                                                                                                                                                                                                                                                                                                                                                                                                                                                                                                                                                                                                                                                                                     |

|            |                                          |                      |                                                                                                                                                                                                                                                                                                                                                                                                                                                                                                                                                                                                                                                                                                                                                                                                                                                                                                                                                                                                                                                                                                                                                                                                                                                                                                                                                                                                                                                                                                                                                                                                                                                                                                                                                                                                                                  |
|------------|------------------------------------------|----------------------|----------------------------------------------------------------------------------------------------------------------------------------------------------------------------------------------------------------------------------------------------------------------------------------------------------------------------------------------------------------------------------------------------------------------------------------------------------------------------------------------------------------------------------------------------------------------------------------------------------------------------------------------------------------------------------------------------------------------------------------------------------------------------------------------------------------------------------------------------------------------------------------------------------------------------------------------------------------------------------------------------------------------------------------------------------------------------------------------------------------------------------------------------------------------------------------------------------------------------------------------------------------------------------------------------------------------------------------------------------------------------------------------------------------------------------------------------------------------------------------------------------------------------------------------------------------------------------------------------------------------------------------------------------------------------------------------------------------------------------------------------------------------------------------------------------------------------------|
|            | assembly                                 |                      | P1, PRKCH, ROCK1, NTN1, COLQ, SNAI2, CLSTN2, NRXN1, MEF2C, ADGRB1, WNT7A, NECTIN1, NTRK2, IL1RAPL1, PTK2, SEMA4D, PPM1F, ADGRL2, EPHB1, NRP1, EPHB2, FLRT2, DLG5, SYNDIG1, NLGN1, ASIC2, EFNA5, ROCK2                                                                                                                                                                                                                                                                                                                                                                                                                                                                                                                                                                                                                                                                                                                                                                                                                                                                                                                                                                                                                                                                                                                                                                                                                                                                                                                                                                                                                                                                                                                                                                                                                            |
| GO:0034220 | ion transmembrane transport              | 2.553805575865543e-7 | UNC80, CACNA2D3, SLC17A1, SLC24A2, KCNH5, MICU2, SLC25A21, SLC37A1, PIEZO2, DPP10, ITPR2, PDE4D, BCL2, KCNMA1, CHRNA7, GABRB3, ANO6, CACNG2, SLC4A10, NEDD4, GRIK3, ATP2B2, TUSC3, GABRB1, GRIA1, SLC39A12, SLC8A3, PRKD1, CHRM3, LRP2, FGF12, GABRA6, TMEM38B, SLC24A3, THADA, NEDD4L, TRPM1, SLC39A11, APP, SLC7A2, CACNA1C, CACNB2, GABRG2, TMC1, SLC8A1, KCNE4, AKAP6, KCNK10, TRPC5, CLIC6, RYR3, HECW1, KCNJ1, TRPC7, SLC16A1, NIPAL2, MICU1, LRRC38, GRIK4, AKAP9, RASGRF2, KCNS3, GRM1, GABRG1, DAPK1, SLC24A4, SCN2A, ANK2, RYR2, SLC9C1, SLC36A1, ABL1, SLC1A1, SLC12A8, KCNH1, ANO4, GRID2, GSG1L, RASGRF1, ATP11C, ABCB7, PRKCE, SLMAP, WNK2, ABCC9, P2RX6, HTR2C, ALG10B, ATP8A1, OPRM1, ABCC4, HTR2A, CNM4, STAC, CNIH3, MAIP1, KCND2, AFG3L2, ANK3, NIPA2, TMC7, TMEM163, ATP6V1E1, CACNA1I, KCNJ15, SCN11A, NETO2, RELN, SLC23A2, SLC39A6, KCNH8, SLC37A2, SLC9A4, GABRR2, CNKSR3, GRIK2, LRRC8B, CFTR, SLC30A10, SELENON, GRIN2A, JPH1, TRPM6, SLC12A1, KCNQ3, SHISA9, SLC4A4, SCN10A, KCND3, KCNN3, LYN, SLC15A2, SLC13A5, CRACR2A, CUL5, GRID1, COX5A, GABRG3, ZDHHC17, UTRN, KCNC1, HCN1, GRIN2B, KCNK5, SLC40A1, SLC5A12, COX7A2L, LASP1, NRXN1, TWIST1, SLC1A7, TRPV5, ABCC8, CACNA1E, ATP2B1, CLCA4, OTOF1, SLC6A1, SHROOM2, SLC6A11, KCNJ18, CEMIP, CBLIF, PARK7, ADCYAP1R1, ATP13A3, MEF2C, ATP6V1C2, ATP6V1B2, GABRA5, SHISA6, TRPM7, GRIK1, DIAPH1, APOL1, SCARA5, SLC26A2, NOS1AP, SLC9A5, SLC5A1, ANO10, FYN, SCN8A, TMEM63C, NCS1, ATP5PF, NALCN, TRPM3, SLC39A8, SLC16A9, HECW2, GRM5, ATP5CKMT, KCNJ6, DPP6, EPHB2, TSPAN13, ATP6V0D2, CACNG3, ATG5, VMP1, SLC1A2, GABRA2, KCNIP4, TRDN, NLGN1, NOS1, SLC6A3, ASIC2, KCNQ5, CACNA2D1, HTT, SLC25A18, CCR2, ANO2, GRIA4, CATSPER2, RGS7, CLCN5, SLC13A4, KCNAB1, ATP10A                                                                           |
| GO:0071495 | cellular response to endogenous stimulus | 2.572959194240459e-7 | NOTCH2, BCAR3, MTOR, NSG1, NLK, PLCB1, PTPRA, ITPR2, PDE4D, RDX, MYO5A, PRDM16, FBN1, ROBO2, GABRB3, ZEB1, AKR1C3, RARB, SPRED1, ALK, APC, CRKL, SOX5, KDM4C, EGFR, NCOR1, NEDD4, BCL11A, SOX6, NTRK3, RXFP1, GABRB1, NEO1, PAK1, CHRM3, RAPGEF2, LRP2, RUNX2, FGF12, CPS1, ONECUT1, CPEB4, TMEM38B, UBE2L3, SMYD3, RPTOR, GHR, COL4A2, HDAC9, APP, GABRG2, NTF3, SLC8A1, KANK1, BMPR1B, PCSK6, AKAP6, RAB8B, LARP1, RAP1GDS1, PRKCZ, GRB10, RYR3, DEFA3, DUSP22, YAP1, MAPK1, HRH2, PDGFD, UBE2O, SPIDR, GABPA, HRH4, GLP2R, ITGB8, HIVEP1, CTNNA1, AKAP9, KLF15, PPARA, NR5A2, PTPRK, TRERF1, TMEM108, BCAS3, RYR2, BBS2, SMARCA4, USP8, MBD5, ELAVL4, ABL1, PTPN12, HDAC4, SLC1A1, PRKAA1, RAP1A, FGF10, LATS2, PRKCE, ESRRG, DENND4C, FBN2, CD44, PDE3A, EXT1, SPRED2, PTPN2, HTR2C, LTBP1, ZFYVE9, OPRM1, HTR2A, GNAL, CCND3, CRIM1, FBXO32, LTLRAD4, BLM, BMP2, PSG9, SOGA1, TBC1D4, LEMD3, FGF9, ZNF106, DSTYK, RAP1GAP, SMARCC1, SNX6, SMOC2, IDE, GAREM1, ATF2, UMODL1, BBS4, CFTR, RGM, UBR1, CHRM5, SLC30A10, SELENON, PTPRE, PRKN, TBX20, SNX25, ROCK1, LYN, VCAM1, CTSB, OVOL2, RRAGD, ARID1B, INSR, SNAI2, RXRG, NREP, ENPP1, BMP5, BCL2L1, SERPINB9, HCN1, GRB14, SMAD5, MED1, KL, ACTR2, PTH, SOSTDC1, PRKAA2, ABHD2, VSTM2A, IQGAP1, NRXN1, PBLD, PEG10, JAK2, FSTL1, CREBBP, UFL1, PRKCB, ATP2B1, ASS1, OTOF1, CIDEA, EXT2, STAT1, BRMS1L, NR2C1, IMPACT, PARK7, ITGA4, MYOCD, ACACA, MEF2C, RXRA, WNT7A, RBPM5, OR10H2, PDE2A, SDCBP, WWOX, NCK1, EPHA4, NTRK2, IL17RD, PTK2, CDH5, DIAPH1, CYFIP1, UBE3A, FAT4, PTGFR, FYN, HDAC2, FUT8, TET1, ITGA8, GRM5, PID1, POR, KIF16B, NSG2, GNA14, BMPER, EPHB2, STXBP4, MAGI2, FLRT2, SLC1A2, GNAS, BMP7, PDGFC, SLIT2, ERBB4, PRKCQ, EFNA5, GAS2L1, SLIT3, ESR1, CACNA2D1, PRLR, PIK3R3, FER, HRH1, ROCK2, RGS8, RAB31, GNG2, PNPLA3, ZNF423, HNRNPU, IGF1R, THRB |
| GO:0016192 | vesicle-mediated                         | 3.189940367705       | NSG1, EXOC1L, ABCA13, LRP12, TRAPPC9, UNC13C, TMPRSS2, CLTCL1, MICAL3, RDX, STXBP1, ERC1, RALA, EPS15L1, MYO5A, SYT16, COG5, RIMS1, PIK3C3, SPIRE1, EXOC6B, MYO1E, TRAPPC8, RIMS                                                                                                                                                                                                                                                                                                                                                                                                                                                                                                                                                                                                                                                                                                                                                                                                                                                                                                                                                                                                                                                                                                                                                                                                                                                                                                                                                                                                                                                                                                                                                                                                                                                 |

|            |                                    |                       |                                                                                                                                                                                                                                                                                                                                                                                                                                                                                                                                                                                                                                                                                                                                                                                                                                                                                                                                                                                                                                                                                                                                                                                                                                                                                                                                                                                                                                                                                                                                                                                                                                                                                                                                                                                                                                                                                                                                                                                                                                                         |
|------------|------------------------------------|-----------------------|---------------------------------------------------------------------------------------------------------------------------------------------------------------------------------------------------------------------------------------------------------------------------------------------------------------------------------------------------------------------------------------------------------------------------------------------------------------------------------------------------------------------------------------------------------------------------------------------------------------------------------------------------------------------------------------------------------------------------------------------------------------------------------------------------------------------------------------------------------------------------------------------------------------------------------------------------------------------------------------------------------------------------------------------------------------------------------------------------------------------------------------------------------------------------------------------------------------------------------------------------------------------------------------------------------------------------------------------------------------------------------------------------------------------------------------------------------------------------------------------------------------------------------------------------------------------------------------------------------------------------------------------------------------------------------------------------------------------------------------------------------------------------------------------------------------------------------------------------------------------------------------------------------------------------------------------------------------------------------------------------------------------------------------------------------|
|            | transport                          | 4265e-7               | <p>2, CARMIL1, MCTP1, FCHO2, RIN2, ANO6, CACNG2, PTPRJ, EGFR, DENND1A, ANGPT1, MACF1, DOCK2, NEDD4, BTBD9, CECR2, DNAJC13, RABEP1, DGKI, C12ORF4, GRIA1, PRKD1, PAK1, LRP2, LDLRAD3, TAFA4, SYN2, GHR, NEDD4L, APP, CACNB2, DCLK1, SYT1, ARHGAP44, NTF3, CD2AP, FMN2, RAB8B, ERC2, DNM3, CUBN, SYN3, RAB27B, CNST, VPS35L, MAPK1, CADPS2, RABGAP1L, COPB1, SYT10, UBE2O, ANKFY1, STON2, SYNJ1, PLA2R1, VPS13C, TMEM108, RAB22A, SOCS1, AMPH, DYSF, ANK2, BBS2, NKG7, TBC1D5, BLK, ABL1, SLC1A1, PRKAA1, CCDC91, EIPR1, NBAS, RAP1A, NRG1, GSG1L, AP3B1, SH3GL3, PRKCE, USP33, CEP83, EGF, STXBP6, CLEC16A, ZFYVE9, ABCC4, HTR2A, BIN2, CNIH3, APBA2, SH3KBP1, EPN2, GRK3, CD163, ANK3, COG2, VPS41, LYPLA1, TRAPPC11, HHIPL1, HIP1, VPS37A, VAV1, RUFY2, PACSIN2, SNX3, CACNA1I, DNER, SLC10A7, LRP1B, STX12, ATP9A, TRAK1, EVI5, MSR1, TBC1D4, RIN3, BMP2K, HMGB1, AP4E1, PRG4, UNC13B, DOCK1, SNX8, SEC23B, SLAMF1, SNX6, MAPK8IP1, CFTR, DOP1B, NEU3, PHAF1, REPS1, PRKN, MTMR2, LYST, ALS2, USP7, VAV3, MON2, MESD, ITSN2, SOX30, RALB, YIPF6, MYO1D, SEC24D, ROCK1, LYN, CRACR2A, INSR, DMBT1, ARFGEF1, IGHV3-74, TOM1, PLPP4, ESYT2, CD9, TMED3, XKR5, ENPP1, RASGRP1, SNX9, BCL2L1, IGHV2-70D, SYNJ2, MICALL2, SCFD2, CAMLG, NRXN1, ENTHD1, SNAP91, PEG10, MPPE1, ARL11, PRKCB, NRBP1, GRIP1, IGHV10R15-9, SAR1A, CNIH1, TRAPPC3, XKR6, EXOC1, ITGA4, BCAP29, TM9SF4, RAPGEF4, ARL4C, ADGRB1, WNT7A, MAGEL2, RAB38, SDCBP, JPT2, FGR, TRIM23, SNAP29, C2, IL1RAPL1, NUMB, ADAMTS9, COLEC12, STON1- GTF2A1L, MEGF10, MVB12B, PTK2, CD5L, AP4S1, ARHGAP12, SCAMP1, CYFIP1, UBE3A, AP2B1, SCARA5, HEATR5A, BICD1, FYN, ATP9B, EHB1, APELA, CDH2, FBXL20, NRP1, FCHSD2, RNF215, BCR, NRXN3, ELMO1, KIF16B, ARFGAP3, NSG2, CUX1, EPHB2, CSNK1G1, MYO5B, MET, CDH13, CACNG3, ATG5, MAGI2, KALRN, TMPRSS15, GAPVD1, TRAPPC10, WDR41, ABL2, TRAPPC6B, TMPRSS3, EXOC4, SYNDIG1, NLGN1, RAB27A, KIF13A, AP5M1, LOXL2, IGLC3, IRAG2, HTT, CAMK1D, HLA-F, FER, CCR2, OSBPL5, IGHV10R21-1, RAB31, HSPG2, WASHC1, HOOK3, CLCN5, VTI1A, CADPS, IGF1R, DNM1L</p> |
| GO:0045595 | regulation of cell differentiation | 3.5371997776471997e-7 | <p>NOTCH2, BRINP3, MTOR, CNTN4, PTPRD, SMOC1, ULK2, FTO, PLCB1, ZNF536, ZFPM2, TENM4, ZDHHC21, RIPOR2, BCL2, FBN1, ROBO2, ZEB1, RARB, SPRED1, USH2A, ALK, FOXJ2, CARMIL1, RIN2, APC, DSCAM, TCF4, CRKL, SOX5, KDM4C, EGFR, RFX3, CDK12, MACF1, BCL11A, SOX6, TMEM182, CDH4, NTRK3, PRKD1, EPHA7, SPEN, RAPGEF2, LRP2, RUNX2, GHR, HDAC9, ZHX3, APP, STAU2, SEMA5A, VCL, NTF3, AURKA, KANK1, BMPR1B, AKAP6, ARNT, PAK3, DIP2B, ITPKB, TRPC5, PRKCZ, ABCA5, YAP1, BRINP1, MAPK1, GABPA, MYLK3, PAFAH1B1, EFEMP1, NF2, RBFOX1, CTNNA1, PPARA, MEIS2, PRTG, SYNJ1, TIAM1, SEMA3C, GATAD2B, IL34, ADGRV1, WNT9B, RANBP3L, SEMA6D, SMARCA4, TNFR, ABL1, HDAC4, DROSHA, RAP1A, GLIS1, CAMK4, FGF10, NRG1, ASPM, AP3B1, ATP11C, ZBTB16, ZNF675, SH3GL3, FBN2, TRIO, PDE3A, LIMD1, SPRED2, RPS6KA3, PTPN2, PLXNA2, HTR2C, ARHGEF7, AMBRA1, OPRM1, HTR2A, FANCA, SEMA3E, ANKRD17, BICRAL, MOSMO, BCL11B, DOCK5, MBP, TRPS1, CRIM1, LDLRAD4, HLA-B, DISC1, SEMA3A, BMP2, RC3H2, PSG9, MSR1, SEMA3D, RELN, HMG B1, FGF9, NFATC2, ANKRD26, ESRP1, DOCK1, RAP1GAP, NIN, DRAXIN, SMARCA2, ETS1, GLI3, SMARCC1, PCP4, MAP2, LAMC1, COL5A1, NELL1, KITLG, DCC, RORB, DAB1, TBX20, DPF3, PRKCH, IL6R, HEMGN, TOX, ROCK1, LYN, PLEKHB2, DTX1, OVOL2, NTN1, ZFHX3, DPYSL5, ARID1B, CASZ1, SNAI2, TRIM58, NREP, TWIST2, ENPP1, RASGRP1, BMP5, CSF1, CTDP1, ASB4, SMAD5, ABCG1, PRAME, MYCL, TNF, MED1, IL33, AJAP1, ROR2, LMX1A, TMEM178A, IL10, ACTR2, PRAMEF25, PTH, SOSTDC1, VSTM2A, MAP6, ZBTB7C, ANP32B, PCID2, TWIST1, JAK2, MELTF, UFL1, NFKBIA, ABCC8, NEDD9, OLFM4, STAT1, PRAMEF2, IMPACT, MYOCD, MEF2C, WNT7A, RBPMS2, MAP3K5, NDFIP1, FBXW8, SDCBP, EPHA4, NTRK2, IL1RAPL1, NUMB, ADAMTS9, CD101, MEGF10, IL17RD, FBXO31, PTK2, CDH5, NFKBID, CLDN18</p>                                                                                                                                                                                                                                                                                                         |

|            |                                    |                       |                                                                                                                                                                                                                                                                                                                                                                                                                                                                                                                                                                                                                                                                                                                                                                                                                                                                                                                                                                                                                                                                                                                                                                                                                                                                                                                                                                                                                                           |
|------------|------------------------------------|-----------------------|-------------------------------------------------------------------------------------------------------------------------------------------------------------------------------------------------------------------------------------------------------------------------------------------------------------------------------------------------------------------------------------------------------------------------------------------------------------------------------------------------------------------------------------------------------------------------------------------------------------------------------------------------------------------------------------------------------------------------------------------------------------------------------------------------------------------------------------------------------------------------------------------------------------------------------------------------------------------------------------------------------------------------------------------------------------------------------------------------------------------------------------------------------------------------------------------------------------------------------------------------------------------------------------------------------------------------------------------------------------------------------------------------------------------------------------------|
|            |                                    |                       | , LAMB1, CYFIP1, SEMA4D, FAT4, RUNX1, GPR55, NSUN2, TNFSF11, HDAC2, MAPK9, CRTAM, GPR137B, EPHB1, GRM5, NRP1, PRKCA, FAIM, RC3H1, CHODL, POR, FBLN1, RAG1, CUX1, MACROH2A1, MITF, EPHB2, MYB, KALRN, LAMA1, TIAM2, BMP7, NUDT21, DDX6, EYA1, SLIT2, ROBO1, PBX1, NLGN1, EFNA5, TCF12, LOXL2, PRLR, CCR2, SEMA4B, ROCK2, PRDM1, RORA, ATAT1, HOOK3, FSTL4, STK3, HNRNPULI2                                                                                                                                                                                                                                                                                                                                                                                                                                                                                                                                                                                                                                                                                                                                                                                                                                                                                                                                                                                                                                                                 |
| GO:0043087 | regulation of GTPase activity      | 3.5876464045310197e-7 | BCAR3, MTOR, GARNL3, MYO9A, RIPOR2, RDX, FGD4, CRKL, ARHGAP24, DOCK10, DENND1A, NTRK3, DGKI, RALGPS1, RAPGEF2, RALGAP1, RAPGEF5, DOCK8, MAPRE2, ARHGAP44, NTF3, MAP4K4, RAP1GDS1, RABGAP1L, TBC1D22A, CHN1, PAFAH1B1, RASGRF2, RGL1, TIAM1, ARAP2, TBC1D9, BCAS3, TBC1D5, RAP1A, RASGRF1, ASAP2, PLXNA2, ARHGEF7, VAV1, IQSEC1, EVI5, RALGAP2, SGSM1, TBC1D4, ARHGAP42, RAP1GAP, SRGAP2, BBS4, TBC1D13, NGEF, ALS2, DOCK9, VAV3, ARFGEF1, RALGPS2, RASGRP1, SNX9, PRKG1, RASGEF1C, IQGAP1, FICD, NET1, SIPA1L2, ZC3H15, NEDD9, ITGA6, RAPGEF4, EPHA4, NTRK2, PTK2, ARHGAP12, SEMA4D, RASGEF1B, ASAP1, GPR137B, TBC1D1, BCR, RGS6, MET, KALRN, GNAS, TIAM2, GAPVD1, WDR41, TRAPPC6B, SIPA1L3, EFNA5, RGS8, RGS7, RSU1, RAB3GAP2                                                                                                                                                                                                                                                                                                                                                                                                                                                                                                                                                                                                                                                                                                            |
| GO:0007423 | sensory organ development          | 3.872429963251375e-7  | NOTCH2, BCAR3, BNC2, SMOC1, SCAPER, RIPOR2, RP1, BCL2, ALDH1A2, FBN1, TENM3, ZEB1, RARB, SPRED1, USH2A, MYO3B, DSCAM, EGFR, CRB1, CECR2, ATP2B2, NTRK3, FLT1, ADAM10, ABCB5, CACNA1C, DCLK1, STAU2, TMC1, BMPR1B, MAPK1, NIPBL, FAT3, PAFAH1B1, ATF6, EFEMP1, NF2, MEIS2, ADGRV1, WNT9B, SMARCA4, SLC1A1, TTLL5, FGF10, FBN2, SPRED2, NHS, ATP8A2, BCL11B, ECE1, NPHP4, WDRCP, BMP2, PDE6C, FGF9, TDRD7, CPAMD8, MDM1, ESRP1, PLIS1, GLI3, MEGF11, BBS4, LAMC3, COL5A1, RORB, MYO3A, PCDH15, CDH23, PDE6A, LRIG1, NTN1, HOXC13, PBX3, SP3, DZANK1, BMP5, HCN1, CELF4, VSTM4, MYCL, MED1, ATG4B, FAT1, TTC39C, ANP32B, HIPK1, TWIST1, VSX1, USH1C, ATP2B1, OTOP1, GRXCR1, SHROOM2, ADAMTS18, WNT7A, NECTIN1, PPP2R3A, EPHA4, GABRA5, NTRK2, WNT2B, FAT4, WNT5B, UNC45B, HDAC2, ROR1, ITGA8, XRN2, EPHB1, RP1L1, NRP1, SDK1, BCR, B9D1, BMPER, MITF, EPHB2, EYA4, ATG5, LAMA1, BMP7, EYA1, PBX1, MYH15, SIPA1L3, SLC6A3, RPRGIP1, PRDM1, PTPRQ, GLI2, THRB                                                                                                                                                                                                                                                                                                                                                                                                                                                                                  |
| GO:0050773 | regulation of dendrite development | 4.38617381327632e-7   | PTPRD, ALK, CRKL, TNK, NEDD4, BCL11A, RAPGEF2, ADGRB3, NEDD4L, STAU2, PAK3, TRPC5, HECW1, COBL, FAT3, PAFAH1B1, ELAVL4, ABL1, SDC2, KNDC1, RELN, DCC, DPYSL5, BMP5, ACTR2, DGKG, FBXW8, EPHA4, IL1RAPL1, FBXO31, CYFIP1, SEMA4D, HECW2, CUX1, EPHB2, KALRN, BMP7, CAMK1D, CSMD3                                                                                                                                                                                                                                                                                                                                                                                                                                                                                                                                                                                                                                                                                                                                                                                                                                                                                                                                                                                                                                                                                                                                                           |
| GO:0009987 | cellular process                   | 5.9519124350296e-7    | EBNA1BP2, NOTCH2, BCAR3, BRINP3, MTOR, UNC80, CNTN4, CACNA2D3, SPOCK1, NSG1, SGCD, EXOC1L, WWC1, SLC17A1, ABCA13, IMP2L, GARNL3, LRP12, PTPRD, SLC24A2, FREM1, TRAPPC9, BNC2, PVT1, NEBL, LRRC4C, TMTC1, KCNH5, MICU2, SLC25A21, ANKS1B, SMOC1, MYO9A, ULK2, NLK, LONP2, UNC13C, LRRC49, FTO, KSR1, MGA, RFX7, SNHG14, ZNF236, PLCB1, ZNF536, TTC3, MX2, LIPI, TAF A5, SVIL, TLN2, CLTCL1, SLC37A1, ZFPM2, PIEZO2, MICAL3, TENM4, NUBPL, L3MBTL4, SNAP25-AS1, DLC1, TNRC6B, MGAM, DPP10, ZDHHC21, PTPRA, ITPR2, RIPO2, PDE4D, RDX, RP1, STXBP1, ERC1, RALA, NME7, SLC44A5, EPS15L1, IL1RAPL2, BCL2, MYO5A, ODAD2, KCNMA1, SYT16, ARPP21, PRDM16, ALDH1A2, ARHGAP26, FBN1, LRFN2, LPCAT2, GPHN, COG5, CDH8, CHRNA7, DCDC1, GPR158, ROBO2, PUDP, RIMS1, PIK3C3, EP C2, SPIRE1, TENM3, GABRB3, ZEB1, AKR1C3, CNTLN, CNTNAP5, SDCCAG8, RARB, FGD4, EXOC6B, SPRED1, GALNT1, NAV2, ENPEP, SPAG16, MYO1E, TRAPPC8, PLPPR1, USH2A, CEP192, MINAR1, CDC42EP3, RIMS2, PCMTD1, ALK, MICOS10, AUTS2, ADGRE1, PCDH7, FOXJ2, CDYL2, CARMIL1, MCTP1, PJA2, FAM135B, THSD4, BABAM2, SV2C, PAPP2, GLIS3, FANK1, ERBIN, ERCC6L2, RHPN2, HACD2, ASTN1, HLCS, FCHO2, RIN2, PARVB, ANO6, CACNG2, DLGAP1, NEGR1, ZNF880, GLYAT, MLLT3, EGLN3, GPC6, CNTNAP2, MAP4, MAP3K9, MYO3B, PGBD5, MOCOS, SPON1, APC, ZMYM4, ZNF595, HHLA2, TSHZ3, RBFOX3, PLPPR5, DSCAM, MYO5C, RTN1, TCF4, CRKL, ILDR2, SOX5, SETD2, TANGO6, ERG, ARHGAP24, ZNF573, TNK, SLC4A10, URB1, |

|  |  |  |                                                                                                                                                                                                                                                                                                                                                                                                                                                                                                                                                                                                                                                                                                                                                                                                                                                                                                                                                                                                                                                                                                                                                                                                                                                                                                                                                                                                                                                                                                                                                                                                                                                                                                                                                                                                                                                                                                                                                                                                                                                                                                                                                                                                                                                                                                                                                                                                                                                                                                                                                                                                                                                                                                                                                                                                                                                                                                                                                                                                                                                                                                                                                                                                                                                                                                                                                                                                                                                                                                                                                                                                                                                                                                                                                                                                                                                                                                                                                                                                                                       |
|--|--|--|---------------------------------------------------------------------------------------------------------------------------------------------------------------------------------------------------------------------------------------------------------------------------------------------------------------------------------------------------------------------------------------------------------------------------------------------------------------------------------------------------------------------------------------------------------------------------------------------------------------------------------------------------------------------------------------------------------------------------------------------------------------------------------------------------------------------------------------------------------------------------------------------------------------------------------------------------------------------------------------------------------------------------------------------------------------------------------------------------------------------------------------------------------------------------------------------------------------------------------------------------------------------------------------------------------------------------------------------------------------------------------------------------------------------------------------------------------------------------------------------------------------------------------------------------------------------------------------------------------------------------------------------------------------------------------------------------------------------------------------------------------------------------------------------------------------------------------------------------------------------------------------------------------------------------------------------------------------------------------------------------------------------------------------------------------------------------------------------------------------------------------------------------------------------------------------------------------------------------------------------------------------------------------------------------------------------------------------------------------------------------------------------------------------------------------------------------------------------------------------------------------------------------------------------------------------------------------------------------------------------------------------------------------------------------------------------------------------------------------------------------------------------------------------------------------------------------------------------------------------------------------------------------------------------------------------------------------------------------------------------------------------------------------------------------------------------------------------------------------------------------------------------------------------------------------------------------------------------------------------------------------------------------------------------------------------------------------------------------------------------------------------------------------------------------------------------------------------------------------------------------------------------------------------------------------------------------------------------------------------------------------------------------------------------------------------------------------------------------------------------------------------------------------------------------------------------------------------------------------------------------------------------------------------------------------------------------------------------------------------------------------------------------------------|
|  |  |  | <p>PTPRJ, OCA2, KDM4C, NEK4, DOCK10, TSHZ2, EGFR, ZNF280B, RFX3, DENND1A, USP14, ANGPT1, CDK12, BACH1, MACF1, CTNNA3, PRKACB, NEK7, RGS3, NCOR1, RNF220, HMCN2, DOCK2, DIAPH3, ZNF407, UGT3A2, NEDD4, MYOF, MAML2, MTRF1, SND1, SCAI, GNPTAB, CRB1, NSMCE2, BTBD9, BCL11A, SOX6, FAM83F, TMEM182, PSMB2, SGMS1, CECR2, GRIK3, ARMC2, CHSY1, FLI1, RPRD1A, PTPN4, CDH4, B3GALT5, ATP2B2, NTRK3, LARGE1, RXFP1, C5, PDE1C, TUSC3, FBXL7, ZFAND6, CYP2C9, PHACTR1, DKK2, FLT1, DNAJC13, ZNF648, RFC3, RABEP1, ADAMTS6, ZNF382, GK, TASP1, CNTN3, THRAP3, MAPKBP1, AOA1, NAT1, GABRB1, PSMA8, DGKI, INVS, C12ORF4, EDAR, GRIA1, CRACD, CAST, NUP214, NEO1, CNTN6, SLC39A12, CABLES1, SLC8A3, MALRD1, TOM1L2, CEP128, NELL2, PRKD1, TPTE2, PAK1, GMDS, EPHA7, CTNNA1, NCOA7, KHDRBS2, CHRM3, ADSS2, GRAMD1B, RALGPS1, SPEN, CHSY3, RAPGEF2, PELI2, LRP2, ADGRB3, DEUF1, RUNX2, ARSB, FGF12, GABRA6, CPS1, TAOX3, ONECUT1, CPED4, TMEM38B, AGK, ADAMTSL1, CSTF3, BCKDHB, PRICKLE2, RANBP17, SLC24A3, SLC44A1, UBE2L3, LDB2, TAF4A, PPP2R2B, BTBD11, PUM3, PTPRN2, SYN2, CCL28, SMYD3, PATJ, TYW1, HERC2, LRIG1, TMEM241, GRM7, SEPTIN9, RETREG1, RPTOR, DNAH6, TMEM117, GHR, EPB41L3, KIF4A, THADA, COL4A2, AIG1, SSBP3, TMEM74, RALGAPA1, CELF2, RAPGEF5, TBCD, NEDD4L, ADAM32, PPP1R12B, TRPM1, ADAM10, HDAC9, ZHX3, UBA6 -</p> <p>DT, ATF7IP, SLC39A11, UBE2G1, IL1R1, APBB2, PHACTR2, APP, SLC7A2, ABCB5, ADK, RPS6KA2, SAMS1, KYNU, CACNA1C, KDM1B, CACNB2, KLHL13, MTUS1, PHKB, DCLK1, STAU2, GABRG2, DOCK8, TMCC1, MAPRE2, ZNF600, USP18, SEMA5A, SYT1, VCL, ARHGAP44, NTF3, ACER2, PARP15, NDUFAF2, CD2AP, ZNF723, AURKA, PARN, IGSF5, TTC29, CFDP1, ST18, PYGO1, SLC8A1, HERPUD2, SSBP2, PTPRR, SRGAP2C, DTWD2, ANKRD31, FIG4, DUX4, TAF2, ABCG8, FRMD3, UPP2, CCSE2, ECPAS, SRGAP2B, KANK1, KCNE4, MAP4K4, HIVEP2, ABCD2, BMPR1B, FMN2, THSD7A, PCSK6, AKAP6, HOMER2, ZNF717, CTNNA2, HADHB, ARNT, RAB8B, PAK3, RFTN1, PDE1A, ZNF257, TLL7, DIP2B, KCNK10, RANBP2, LARP1, ITPKB, TRPC5, RGS20, PDE10A, UBE2E2, RAP1GDS1, HHAT, CLIC6, CHST8, KICS2, ERC2, DNM3, NBN, CUBN, SCP2, SYN3, IFT57, INTS7, RBM47, SUS6, PRKCZ, CALD1, KLHL1, SPOP, BTLA, MAN2A2, GRB10, RYR3, TAF15, DIP2A, MSH6, MCPH1, ARHGAP32, RAB27B, COL27A1, ZSWIM6, FER1L6, ST8SIA5, CNST, RGS9, HECW1, DEFA3, MBNL2, ADAMTS17, ABCA5, PHF19, MRTFA, TAF4B, COBL, SENP6, DUSP22, GALNT14, LMNTD1, PDXDC1, EBF2, UBN1, SV2B, YAP1, ESS2, FRYL, SEM1, NFIA, WDR70, PPM1L, RIPK4, ZKSCAN5, SHC4, VPS35L, BRINP1, MAPK1, MGAT5, CADPS2, KCNJ1, CADM2, HRH2, ABCD3, RABGAP1L, SGTB, DNAH14, TRPC7, ADAM22, USP25, CRISPLD2, KMT2E, ALCAM, PLG, PCGF5, PDGFD, COB1, SYT10, ZNRF3, DNAJC21, CA5A, XXYL1, PPP1R1C, ABLIM1, ITGBL1, ARHGEF17, NRG3, UBE2O, SFMBT2, ANKFY1, NCAM1, GFRA1, SYCP1, NIPBL, RNF17, SLC16A1, SPIDR, GALNT16, NIPAL2, PI4K2B, RINGT, IPO11, EWSR1, MTMR10, GABPA, FAT3, MICU1, ZNF735, CORO2B, CARD18, CHD6, STK38, LCE1F, PTPN13, CHN1, HRH4, SORCS3, MYLK3, ACSBG1, KANS1, GLP2R, LIMCH1, FMN1, MBNL1, PAFAH1B1, ATF6, EFEMP1, TLL1, ZNF684, TM7SF3, DCAF1, ITGB8, STON2, VPS13D, CCNG2, TLK1, TPM1, NF2, LRRC38, AVL9, CNKSR2, MRPS22, GRIK4, RBFOX1, WDFY4, ZDHHC14, HIVEP1, CORIN, CTNNA1, PPP1R9A, CDH7, MOB3B, BIRC6, AKAP9, KLF15, RASGRF2, PPARA, PPIP5K1, MEIS2, SNX30, LCLAT1, NFIB, KCNS3, ERMP1, MRTFB, PPP6R3, PRTG, RGL1, SYNJ1, NR5A2, ADAMTS3, TIAM1, MPRIP, ARAP2, GRM1, FOXJ3, UBE3D, KAZN, RSRC1, PTPRK, ARHGEF12, GABRG1, ENAH, PAK5, ST6GALNAC3, TRERF1, SF3B6, PARDB3, PCDH11Y, PPP2R5E, PDZRN3, PLA2R1, EIF3D, SEMA3C, DAPK1, NAV3, SLC24A4, SEC14L1, FAR2, VPS13C, TMEM108, ACSM2B, AGO2, WDHD1, STK32B, PHC3, MAGI1, ALPK2, DNAH11, JARID2, SCN2A, RIC8B, RAB22A, SORCS1, DNAJC15, AMPH, GATAD2B, CPE, PALS2, EVC2, DYSF, IL34, ANK2, STAG2, BRWD1, TANC1, THUMPD2, ADGRV1, ZNF846, MELK, BCAS3, RYR2, SYNE2, BBS2, WNT9B, ZNF606, SLC9C1, CLPX, RANBP3L, OR4F6, NKX7, SEMA6D, AIF1L, NBEA, ASAH2B, SHOC1, DUSP16, SRFBP1, SMARCA4, MRPS35, CDH11, USP8, LDB3, FABP7, PARD3, SLC36A1, MAPKAP1, EFTUD2, TNRC6C, PI</p> |
|--|--|--|---------------------------------------------------------------------------------------------------------------------------------------------------------------------------------------------------------------------------------------------------------------------------------------------------------------------------------------------------------------------------------------------------------------------------------------------------------------------------------------------------------------------------------------------------------------------------------------------------------------------------------------------------------------------------------------------------------------------------------------------------------------------------------------------------------------------------------------------------------------------------------------------------------------------------------------------------------------------------------------------------------------------------------------------------------------------------------------------------------------------------------------------------------------------------------------------------------------------------------------------------------------------------------------------------------------------------------------------------------------------------------------------------------------------------------------------------------------------------------------------------------------------------------------------------------------------------------------------------------------------------------------------------------------------------------------------------------------------------------------------------------------------------------------------------------------------------------------------------------------------------------------------------------------------------------------------------------------------------------------------------------------------------------------------------------------------------------------------------------------------------------------------------------------------------------------------------------------------------------------------------------------------------------------------------------------------------------------------------------------------------------------------------------------------------------------------------------------------------------------------------------------------------------------------------------------------------------------------------------------------------------------------------------------------------------------------------------------------------------------------------------------------------------------------------------------------------------------------------------------------------------------------------------------------------------------------------------------------------------------------------------------------------------------------------------------------------------------------------------------------------------------------------------------------------------------------------------------------------------------------------------------------------------------------------------------------------------------------------------------------------------------------------------------------------------------------------------------------------------------------------------------------------------------------------------------------------------------------------------------------------------------------------------------------------------------------------------------------------------------------------------------------------------------------------------------------------------------------------------------------------------------------------------------------------------------------------------------------------------------------------------------------------------------|

|  |  |                                                                                                                                                                                                                                                                                                                                                                                                                                                                                                                                                                                                                                                                                                                                                                                                                                                                                                                                                                                                                                                                                                                                                                                                                                                                                                                                                                                                                                                                                                                                                                                                                                                                                                                                                                                                                                                                                                                                                                                                                                                                                                                                                                                                                                                                                                                                                                                                                                                                                                                                                                                                                                                                                                                                                                                                                                                                                                                                                                                                                                                                                                                                                                                                                                                                                                                                                                                                                                       |
|--|--|---------------------------------------------------------------------------------------------------------------------------------------------------------------------------------------------------------------------------------------------------------------------------------------------------------------------------------------------------------------------------------------------------------------------------------------------------------------------------------------------------------------------------------------------------------------------------------------------------------------------------------------------------------------------------------------------------------------------------------------------------------------------------------------------------------------------------------------------------------------------------------------------------------------------------------------------------------------------------------------------------------------------------------------------------------------------------------------------------------------------------------------------------------------------------------------------------------------------------------------------------------------------------------------------------------------------------------------------------------------------------------------------------------------------------------------------------------------------------------------------------------------------------------------------------------------------------------------------------------------------------------------------------------------------------------------------------------------------------------------------------------------------------------------------------------------------------------------------------------------------------------------------------------------------------------------------------------------------------------------------------------------------------------------------------------------------------------------------------------------------------------------------------------------------------------------------------------------------------------------------------------------------------------------------------------------------------------------------------------------------------------------------------------------------------------------------------------------------------------------------------------------------------------------------------------------------------------------------------------------------------------------------------------------------------------------------------------------------------------------------------------------------------------------------------------------------------------------------------------------------------------------------------------------------------------------------------------------------------------------------------------------------------------------------------------------------------------------------------------------------------------------------------------------------------------------------------------------------------------------------------------------------------------------------------------------------------------------------------------------------------------------------------------------------------------------|
|  |  | <p>AS1,TBC1D5,SPG21,UBE2R2,BLK,COL23A1,RBM6,EBF1,TNR,COL22A1,GRM8,OLA1,DST,CXADR,DOCK4,MBD5,ATRX,NUAK1,PTPRT,XIRP2,ELAVL4,ABL1,AGPS,MXI1,PTPN12,HDAC4,OXR1,SLC1A1,PRKAA1,SDC2,GAS2,SLC12A8,KCNH1,ITGB3BP,MRPS27,LRFN5,RIMBP2,CRTAC1,FHIP1A,CREG1,DROSHA,PRELID2,TTL5,APBB1IP,ANO4,L3MBTL3,DMXL2,CCDC91,EIPR1,APLF,NFAT5,ADAMTS14,MAST4,DNAH5,GUCY1A2,NBAS,CDH18,PSMF1,ATE1,SLFN11,RAP1A,GLIS1,ACSS3,MORC1,LYRM4,MYO10,SLC46A3,GPC5,TOX3,ZNHIT6,CAMK4,BAZ2A,MANBA,PLEKHA8,INPP5A,CPSF3,FGF10,FBXL13,ZC3HAV1,UQCC1,GRID2,CDHR3,GALC,TGM1,PEAK1,LATS2,NRG1,INO80D,GSG1L,CLIP1,ASPM,AP3B1,DENND2B,COL6A5,RASGRF1,PAH,ATP11C,ZNF438,ABCB7,SYNE1,ZBTB16,MUSK,GALNTL6,KIR3DL2,ZNF675,GNF7,SMARCA D1,SH3GL3,ABCC12,SETDB2,RPF1,PRKCE,FOXK2,SLCO3A1,PGM5,MED15,SLMAP,NXN,WNK2,ESRRG,ZNF718,DGKB,USP33,DEND4C,CEP83,CERS6,FBN2,CD44,RGS12,PTPRO,EGF,ALPK3,PRRC1,DMAC1,ABCC9,P2RX6,TRIO,PDE3A,EXT1,STXBP6,COL5A3,NSMAF,LNPEP,LIMD1,PEX14,SPRED2,ADAMTS2,RP6KA3,CTNND2,NHS,IFT43,ATP8A2,SCG5,MTMR3,PTPN2,TRIMS,PLXNA2,POC5,MCF2L,OR4F15,ATXN3,RFC1,ST8SIA6,HTR2C,RIC3,CLEC16A,SLC2A3,ARHGEF7,CD96,ALG10B,ATP8A1,AMBRA1,LTBP1,STK38L,ZFYVE9,GALNT10,KDM7A,OPRM1,ABCC4,PRMT8,HTR2A,BIN2,PLCXD3,FANCM,FANCA,CYBRD1,CYP4A11,DAZL,INPP4B,MATN2,FARS2,GTTF2,PPP2R2C,CNNM4,KREMEN1,STAC,SEMA3E,TAF3,RPRD1B,MARK2,GCSAML,GMPR,TMEM67,RCL1,EBF3,ALPL,ZNF33B,LPP,C10ORF90,FHL2,ABHD17C,ADGRA3,CNIH3,PUM1,TMOD2,HERC1,MSH2,IGF2BP3,GNAL,CDIN1,EPHA6,ANKRD17,APBA2,COL6A6,MAIP1,LINGO2,ZNF397,SH3KBP1,ATL1,SLC2A13,LUC7L,RELL1,HIPK3,CDKN2C,EPN2,KCND2,TNPO3,EVC,SNRPN,ABCA10,GRK3,CPXM2,KNDC1,SPSB4,CLSPN,NOS2,BICRAL,AFG3L2,CPNE4,STK10,MOSMO,GFRA2,TTC7B,MNAT1,TMEM116,RBBP8,MDFIC,SGCZ,TMTC2,CFAP61,ADAM12,MYLK2,ANK3,SNTG1,NIPA2,TMC7,EMILIN2,XYL1,HMGA2,MYOM2,COG2,GBP6,CCND3,BCL11B,VPS41,FOLH1,DOCK5,ECE1,ZIM3,STK32A,CREM,LYPLA1,MBP,AK8,LINC01151,TRPS1,TRAPPC11,TMEM63,CWC27,PLCE1,TGFA,IL17RA,ANKFN1,HIP1,CRIM1,XPNPEP1,FUT9,PRR5L,GXYLT2,VPS37A,GSR,PCDH9,ATP6V1E1,UTP4,CAPN5,VAV1,CYP4Z1,CDH20,EFR3A,MSRA,RUFY2,MYT1L,FBXO32,ZNF160,TJP1,LDLRAD4,NPHP4,EGFLAM,PACSIN2,CNTN1,HLA-B,TARS3,FKBP5,IQSEC1,HSF5,MTHFD1L,SNX3,CACNA1I,NAA35,ZNF367,PDLIM5,BHLHE40-</p> <p>AS1,KCNJ15,CEPT1,BRCA2,AQR,DISC1,ZBTB2,GALNT13,EXD3,DNER,BLM,ASB7,WDPCP,NRK,SLC10A7,SEMA3A,MAGT3,HSF2BP,INTS8,NAP1L4,LIN54,LRP1B,ADCY10,PSG8,STRN,AGL,OR9Q1,ZNF121,ANKRD30BL,STX12,PHACTR3,BMP2,RC3H2,MYLK4,UNC5D,ATP9A,TRAK1,WDR26,PSG9,CDC42BP2,SGA1,EVI5,DSE,PTCD2,SCN11A,MSR1,VRK1,GNAI1,RALGAP2,ZC3H14,NCAM2,GFI1B,TBC1D4,RANBP9,RESF1,MYRIP,TTR,RIN3,MSI2,BMP2K,DNAL1,SLC15A5,TMEM161A,SEMA3D,ASXL3,NETO2,PDE6C,CABIN1,POLR3A,LEMD3,RELN,ARHGAP42,HMGB1,GNAQ,TUBGCP3,NUDCD3,CDS2,AP4E1,FGF9,NFATC2,TDRD7,SH3BP5,UST,RTTN,MDM1,SLC23A2,POLR2M,ZNF106,MYOM1,ZNF567,CLVS1,TRAF3,ZNF462,ANKRD26,ESRP1,UNC13B,TTC21B,ETS2,UBAP2L,GEMIN5,ZNF875,DSTYK,UIMC1,DOCK1,B4GALT6,LRRFIP1,TSPAN2,PFKFB4,RAP1GAP,PLS1,SRGAP2,IKZF2,SNX8,SEC23B,SLC39A6,NIN,HAUS6,DRAXIN,DNAH8,TRIT1,ATF1,GADL1,CCDC186,SLAMF1,KCNH8,SMARCA2,ETS1,FAM83B,GLI3,CGAS,MEGF11,SMARCC1,NHSL1,SNX6,AFF3,SLC37A2,SLC9A4,GABRR2,SMO C2,PACS1,PCP4,CNKSR3,CASP5,VENTX,GRIK2,IDE,WDR12,MCTP2,KIF21A,KIF15,PRDM10,CUL1,MYEF2,ZFYVE26,ZNF431,REERE,PSD3,MAP2,BTAF1,GAREM1,DAW1,MYL1,PEX6,LAMC1,ZNF618,NEK10,RRBP1,FARP1,TDRD5,MOB1B,PIGN,ATF2,NDUFAF6,GOLGA8B,HIRA,CYLD,UMODL1,BBS4,ADARB2,LRRC8B,MAPK8IP1,GOLGA6B,MX1,CLVS2,THSD7B,LAMC3,PSG6,HIVEP3,COL5A1,GABBR2,PSIP1,ITGA9,KIAA0753,CFTR,KPNA1,CSE1L,NELL</p> |
|--|--|---------------------------------------------------------------------------------------------------------------------------------------------------------------------------------------------------------------------------------------------------------------------------------------------------------------------------------------------------------------------------------------------------------------------------------------------------------------------------------------------------------------------------------------------------------------------------------------------------------------------------------------------------------------------------------------------------------------------------------------------------------------------------------------------------------------------------------------------------------------------------------------------------------------------------------------------------------------------------------------------------------------------------------------------------------------------------------------------------------------------------------------------------------------------------------------------------------------------------------------------------------------------------------------------------------------------------------------------------------------------------------------------------------------------------------------------------------------------------------------------------------------------------------------------------------------------------------------------------------------------------------------------------------------------------------------------------------------------------------------------------------------------------------------------------------------------------------------------------------------------------------------------------------------------------------------------------------------------------------------------------------------------------------------------------------------------------------------------------------------------------------------------------------------------------------------------------------------------------------------------------------------------------------------------------------------------------------------------------------------------------------------------------------------------------------------------------------------------------------------------------------------------------------------------------------------------------------------------------------------------------------------------------------------------------------------------------------------------------------------------------------------------------------------------------------------------------------------------------------------------------------------------------------------------------------------------------------------------------------------------------------------------------------------------------------------------------------------------------------------------------------------------------------------------------------------------------------------------------------------------------------------------------------------------------------------------------------------------------------------------------------------------------------------------------------------|

|  |  |  |                                                                                                                                                                                                                                                                                                                                                                                                                                                                                                                                                                                                                                                                                                                                                                                                                                                                                                                                                                                                                                                                                                                                                                                                                                                                                                                                                                                                                                                                                                                                                                                                                                                                                                                                                                                                                                                                                                                                                                                                                                                                                                                                                                                                                                                                                                                                                                                                                                                                                                                                                                                                                                                                                                                                                                                                                                                                                                                                                                                                                                                                                                                                                                                                                                                                                                                                                                         |
|--|--|--|-------------------------------------------------------------------------------------------------------------------------------------------------------------------------------------------------------------------------------------------------------------------------------------------------------------------------------------------------------------------------------------------------------------------------------------------------------------------------------------------------------------------------------------------------------------------------------------------------------------------------------------------------------------------------------------------------------------------------------------------------------------------------------------------------------------------------------------------------------------------------------------------------------------------------------------------------------------------------------------------------------------------------------------------------------------------------------------------------------------------------------------------------------------------------------------------------------------------------------------------------------------------------------------------------------------------------------------------------------------------------------------------------------------------------------------------------------------------------------------------------------------------------------------------------------------------------------------------------------------------------------------------------------------------------------------------------------------------------------------------------------------------------------------------------------------------------------------------------------------------------------------------------------------------------------------------------------------------------------------------------------------------------------------------------------------------------------------------------------------------------------------------------------------------------------------------------------------------------------------------------------------------------------------------------------------------------------------------------------------------------------------------------------------------------------------------------------------------------------------------------------------------------------------------------------------------------------------------------------------------------------------------------------------------------------------------------------------------------------------------------------------------------------------------------------------------------------------------------------------------------------------------------------------------------------------------------------------------------------------------------------------------------------------------------------------------------------------------------------------------------------------------------------------------------------------------------------------------------------------------------------------------------------------------------------------------------------------------------------------------------|
|  |  |  | <p>1,DOP1B,ME2,TBC1D13,UBASH3A,COL14A1,RGMB,NEU3,PHAF1,CEP44,MREPL13,KITLG,ZZEF1,DNAJC7,ATP10B,CAMTA1,UBR1,DCC,MYT1,RNU2-47P,SMPDL3A,CHRM5,GOLGA6D,MAP4K3,HS3ST4,YLPM1,SLC30A10,RCAN1,GTTF2I,RORB,CHAF1A,TADA2A,DAB1,MED27,ZNF208,SELENON,RB1CC1,NMD3,MYO3A,AKAP10,UBE2E1,PTPRE,REP S1,PRKN,AGMO,MTMR2,ZNF608,SH3PXD2A,SPSB1,CDC42BPA,TBX20,SP110,DLGAP2,AFAP1,MAPK10,DACH1,PCDH15,PNPLA7,ZNF541,DPF3,LGI2,LYST,NGEF,HEPHL1,GRIN2A,ARID5B,ZBED9,H2BC15,JPH1,TXNRD2,ATXN1,WSB1,USP43,TRPM6,CDH23,LALBA,PRKCH,PKP1,HUNK,SLC12A1,FRMD4A,TG,IL6R,FRMPD4,PEPD,ALS2,RACGAP1,NLRC5,ZNF627,OR51E1,ACO1,TFDP1,DHRS11,CNOT6L,MKNK1,HEMGN,KANK4,DOCK9,SNX25,DMC1,FBLN5,OSCP1,LCE3B,KCNQ3,TOX,POLR1D,SHISA9,SLC4A4,PTPRB,GOLGA6C,ZFP90,TRMT61B,CATSPERG,PDE6A,COPS8,TSPAN33,TBATA,ZNF124,SCN10A,LRBA,RBMX2,SHANK2,ST8SIA1,MAP7,USP7,VAV3,PSMA1,MON2,ENPP3,PLAGL1,KCND3,HAAO,FAH,MESD,ITSN2,SOX30,PTGFRN,MOK,SYBU,KIR2DL4,ARHGFE28,RALB,NPAS2,ADGRG6,YIPF6,CFAP74,KCNN3,MYO1D,SEC24D,PPA2,FAR1,CA1,ROCK1,LYN,VCAM1,SEL1L,ARHGAP28,ARHGAP31,ZNF780B,CTSB,EIF2B3,TTC37,SLC44A2,GSTA3,SUMO3,SLC15A2,ZNF169,PLEKHB2,KIF11,DTX1,BZW1,TENM2,OVOL2,PIWIL3,ZBTB33,ADA2,NTN1,CHKA,PLCB4,MMP16,PRUNE2,ZFXH3,FANCL,DPYSL5,SLC13A5,ZNF44,RRAGD,BANP,SUPT16H,ARID1B,HOXC13,CRACR2A,RNF152,BAZ1A,CASZ1,OTUD7A,INSR,NPIPA1,CUL5,DMBT1,OR7A17,BMF,YTHDF3,TFF1,DEDD2,NEK6,HECTD1,GRID1,SHROOM3,XRCC4,COLQ,SLC52A1,HDAC11,NMU,DDHD1,PBX3,SUMO2,HS1BP3,ZNF292,ADAMTS19,DPYD,ARFGFE1,PD E4DIP,GAST,POGK,SNAI2,ASH1L,IGHV3-74,HOXC4,BID,SIAH2,PIGK,OSBPL10,RPH3A,TANC2,PGAP4,ZBTB80S,COX5A,ABCA4,TRABD2B,UFD1,RXRG,SP3,DRAM1,ERN2,GABRG3,ZNF879,MBTPS2,FLNB,TRIM58,TIAL1,TOM1,ELF2,PLPP4,NREP,ZDHHC17,NSD2,FYCO1,CERS3,ESYT2,SH3GLB1,PTAR1,SLC22A14,CD9,CARD10,LTN1,TMED3,KRT6B,XKR5,RALGPS2,JCAD,TWIST2,OR4K2,CTIF,SAMHD1,IFT81,ENPP1,ENTPD5,UTRN,MOCS2,RASGRP1,IGSF11,SNX9,TP53I11,CDH26,TMEM225,DZANK1,ANAPC1,PXDNL,UCK2,NDRG2,CSNK2A1,BMP5,PWWP3A,WDR72,KCNC1,CSF1,GHRH,PPIL6,EOGT,HDGFL3,NUP37,BCL2L1,SERPINB9,SCAF4,SPATA48,KRT25,CTDP1,HCN1,PRKG1,LAMA3,HS6ST3,ASB4,GRIN2B,ST13,GRB14,INO80,FANCB,GPR156,IGHV2-70D,CLNS1A,CNMD,DHRS3,KIF21B,SMAD5,CELF4,SYNJ2,TCERG1,ABCG1,OR4C46,FOXN3,KCNK5,VSTM4,SLC40A1,PRAME,HADHA,MYCL,TNN,FAM149B1,CABYR,CIDEC,PSAP,LPGAT1,PSMA5,MICALL2,MED1,IPCEF1,NSUN6,ATG4B,CDC14B,PCNT,SLC5A12,KDM6A,ATRNL,IL33,AJAP1,GPRC5C,ROR2,CFH,PPP2R2A,ZNF521,NPL,KL,RASGEF1C,BANK1,CSDE1,FAT1,HGD,LMX1A,TMEM178A,IL10,TSPAN11,ACTR2,OR1L6,SFPQ,SCML2,PRAMEF25,RIOK1,CLSTN2,HDHD5,TTC39C,PTH,SDF4,SOSTDC1,TOP3B,PRKAA2,CSF2RB,DIRAS2,SKA1,GLYATL1,NDC80,QSOX2,SOHLH1,LARP6,PACRG,ERO1B,PHF20L1,ABHD2,ITPRIP,VSTM2A,MAP6,VASP,PLA2G4A,ETV6,TACC2,SCFD2,RAB12,SNRPC,KIFC1,SLC25A52,IQGAP1,RPS12,CAMLG,COX7A2L,ZBTB7C,TEAD1,MORC2,SREBF2,ANP32B,YBX3,AIMP1,LASP1,THNSL2,FYB2,NRXN1,PCID2,HIPK1,ZNF234,CISD1,ZNF518A,DGKK,FRY,SNAP91,CD70,CYP4F22,CIBAR1,PBLD,FICD,CACYBP,CADM1,SSPN,CENPE,PEG10,LMX1B,NET1,SIPA1L2,TUBB6,NGDN,ELOC,ANLN,TWIST1,RNU6-1150P,AKT3,ALKAL2,RNU1-51P,JAK2,SLC1A7,VSX1,RPF2,FSTL1,CHCHD6,ZBTB38,MPPE1,ISX,BPNT1,SVEP1,MADD,HCRTR1,RBM19,PTGS1,PATL1,ZNF287,CELSR2,ZNF449,PRSS2,FH,TDP1,CREBBP,MELTF,MRM1,TNKS,ARL11,SGO1,GORAB,PCNA,SIAH3,TRPV5,UFL1,ADAMTS5,GLYATL2,NFKBIA,PRKCB,OR2T3,GOT2,NTM,KIF6,ABCC8,MIPEP,PCDH11X,ANXA4,MT1HL1,CACNA1E,ZC3H15,ANP32A,RFC2,SMTN,ZNF354C,ST6GAL2,ALX4,RNU6-113P,RTRAF,USH1C,BRD4,ZBTB21,SERBP1,SMPD4,NEDD9,OLF</p> |
|--|--|--|-------------------------------------------------------------------------------------------------------------------------------------------------------------------------------------------------------------------------------------------------------------------------------------------------------------------------------------------------------------------------------------------------------------------------------------------------------------------------------------------------------------------------------------------------------------------------------------------------------------------------------------------------------------------------------------------------------------------------------------------------------------------------------------------------------------------------------------------------------------------------------------------------------------------------------------------------------------------------------------------------------------------------------------------------------------------------------------------------------------------------------------------------------------------------------------------------------------------------------------------------------------------------------------------------------------------------------------------------------------------------------------------------------------------------------------------------------------------------------------------------------------------------------------------------------------------------------------------------------------------------------------------------------------------------------------------------------------------------------------------------------------------------------------------------------------------------------------------------------------------------------------------------------------------------------------------------------------------------------------------------------------------------------------------------------------------------------------------------------------------------------------------------------------------------------------------------------------------------------------------------------------------------------------------------------------------------------------------------------------------------------------------------------------------------------------------------------------------------------------------------------------------------------------------------------------------------------------------------------------------------------------------------------------------------------------------------------------------------------------------------------------------------------------------------------------------------------------------------------------------------------------------------------------------------------------------------------------------------------------------------------------------------------------------------------------------------------------------------------------------------------------------------------------------------------------------------------------------------------------------------------------------------------------------------------------------------------------------------------------------------|



|  |  |                                                                                                                                                                                                                                                                                                                                                                                                                                                                                                                                                                                                                                                                                                                                                                                                                                                                                                                                                                                                                                                                                                                                                                                                                                                                                                                                                                                                                                                                                                                                                                                                                                                                                                                                                                                                                                                                                                                                                                                                                                                                                                                                                                                                                                                                                                                                                                                                                                                                                                                                                                                                                                                                                                                                                                                                                                                                                                                                                                                                                                                                                                                                                                                                                                                                                                                                                                                                                                      |
|--|--|--------------------------------------------------------------------------------------------------------------------------------------------------------------------------------------------------------------------------------------------------------------------------------------------------------------------------------------------------------------------------------------------------------------------------------------------------------------------------------------------------------------------------------------------------------------------------------------------------------------------------------------------------------------------------------------------------------------------------------------------------------------------------------------------------------------------------------------------------------------------------------------------------------------------------------------------------------------------------------------------------------------------------------------------------------------------------------------------------------------------------------------------------------------------------------------------------------------------------------------------------------------------------------------------------------------------------------------------------------------------------------------------------------------------------------------------------------------------------------------------------------------------------------------------------------------------------------------------------------------------------------------------------------------------------------------------------------------------------------------------------------------------------------------------------------------------------------------------------------------------------------------------------------------------------------------------------------------------------------------------------------------------------------------------------------------------------------------------------------------------------------------------------------------------------------------------------------------------------------------------------------------------------------------------------------------------------------------------------------------------------------------------------------------------------------------------------------------------------------------------------------------------------------------------------------------------------------------------------------------------------------------------------------------------------------------------------------------------------------------------------------------------------------------------------------------------------------------------------------------------------------------------------------------------------------------------------------------------------------------------------------------------------------------------------------------------------------------------------------------------------------------------------------------------------------------------------------------------------------------------------------------------------------------------------------------------------------------------------------------------------------------------------------------------------------------|
|  |  | <p> M4,NRBP1,ITGA6,ATP2B1,GAP43,SLC14A2,IARS2,CLCA4,DGLUCY,ATP1A1-AS1,NOXRED1,ASS1,MTCL1,GRIP1,IGHV10R15-9,CTNNBL1,TM9SF3,ADGRE3,SAR1A,ADCY9,EML1,PPP1R17,CN1H1,MAST2,HPSE2,BTG3,ZNF528,ERLIN2,GOLGA8J,ZNF611,TRAPPC3,XKR6,OTOP1,ADAMTSL3,CIDEA,PCMTD2,ARFGEF3,ZBTB49,BBS9,EXT2,EXOC1,HEPACAM,KRT6A,STOX2,AGO1,FRA10A C1,PDP2,MEOX2,SLC6A1,GID8,ELL2,GRXCR1,SDS,SNAPC3,STAT1,BRMS1L,NDFIP2,NR2C1,MAP2K6,CMTM7,DGKG,SHROOM2,RN7SL483P,SLC6A11,KCNJ18,MARCHF6,GATAD1,MTPN,ABI1,MYO18B,NECTIN4,ARMC6,CEMIP,PRAMEF2,POU6F2,IMPACT,CBLIF,CCBE1,PARK7,ADAMTS18,MAPK8,ITGA4,TOP3A,OAZ2,EIF3F,BCAP29,PPME1,MED12L,ZSCAN30,FBXL17,UBL7,POU1F1,UBE2J2,ADCYAP1R1,PLA2G12B,MTF2,NCAPG2,NDC1,TM9SF4,RAPGEF4,OR6C75,FOXP2,ASB2,MYOCD,HFM1,HMCN1,CEP120,MYH13,ATP13A3,DHTKD1,ZSCAN5C,CYFIP2,HNRNPM,ACACA,KRT85,ASCC2,ST8SIA4,NDUFA10,ARL4C,EFHB,OR13C9,ARID3B,MEF2C,ZNF613,ADGRB1,RXRA,WNT7A,RBPMS2,ECHDC1,MAP3K5,NDFIP1,SLC5A9,MAP3K4,WASF3,S100B,SERPIN1,PRDM13,FOXO6,ERI1,SUMF1,ZNF112,ATP6V1C2,CHAMP1,C16ORF72,MAGEL2,PKN2,RAD51AP1,SLC10A6,OR10H2,PDE2A,RAB38,LRRC2,DBF4B,FBXW8,SDCBP,NECTIN1,DSG1,JPT2,SPPL2B,NSMCE1,ZNF813,WWOX,ZBTB25,PASK,MLLT1,NCK1,FLVCR1,SCAF8,FGR,CWC22,DRC7,CDCA8,PPP2R3A,DNMBP,RNU6-1007P,TRIM23,ATP6V1B2,CXCL2,TOP1,TINAG,SNAP29,MLLT10,C2,SPRR2D,IFNAR1,RNF8,GNG12,LCE3D,EPHA4,PPIP5K2,CYTH4,EMP1,INTS13,GABRA5,MECOM,DNMT3L,NTRK2,IL1RAPL1,FNDC3A,ACSM2A,RSPH1,KHDC4,NUMB,LHX9,ADAMTS9,RN7SL767P,WNT2B,COLEC12,FRRS1,ZBTB10,PLEKHA3,OCLN,POSTN,CREB5,SNRPD1,CD101,STON1-GTF2A1L,SHISA6,MEGF10,IL17RD,FBXO31,EXTL3,AKAP11,TRPM7,KTN1,GRIK1,PRKAB1,DTHD1,IREB2,MFSD9,MVB12B,HS6ST1,PTK2,ERP27,MARK4,CDH5,CD5L,TPH2,RCAN2,ANKRD6,AP4S1,SCGN,NFKBID,ARHGAP12,CLDN18,ASCL3,MPP7,DIAPH1,FEZ2,INIP,LAMB1,SCAMP1,APIP,CYFIP1,UBE3A,SCG3,HOATZ,APOL1,PCDH8,SEMA4D,JAM2,DNAH10,PITPNC1,FRMD6,MC2R,ZBTB20,FAT4,IMPA2,LRMDA,CCDC162P,ZNF66,AP2B1,RUNX1,AKR1B1,C9,KIRREL1,WNT5B,RASGEF1B,AMFR,SAXO1,SCARA5,NEUF,SH2D1B,SLC26A2,POMT2,HEATR5A,PTGFR,ZNF845,PSTPIP2,ZFYVE1,OR4L1,SANBR,ASAP1,SAMD13,ICA1,PLCZ1,EDIL3,NOS1AP,MTTP,SLC9A5,FCRLA,DIDO1,DPY19L2,TPTTE,SORBS2,PDCL3,SRP9,CNKSRL1,CCDC88A,GPR55,NSUN2,SLC27A6,UBAP1L,CHCHD2,GALNT18,HKDC1,ADAMTS16,SPAG6,ACOXL,SLC5A1,MDN1,CDC45,OR11G2,BICD1,ANO10,TNFSF11,FYN,BUB1,KDM5A,PCBP3,NLRP14,DPY19L1,ZNF705G,PPM1F,GOLGA8F,ADGRL2,UNC45B,ARL13B,XPO7,SDE2,ODR4,RBMS3,HYDIN,UHRF2,SCN8A,HDAC2,AVEN,SLF1,SACM1L,GON4L,TBX15,CNTNAP3,TMEM63C,SH2D3C,DOCK3,TRNAU1AP,NCS1,COL18A1,GALNT17,CDH9,ATP5PF,ALB,DOK5,ATP9B,NALCN,UGP2,MTMR7,EHBP1,ZFYVE28,MAPK9,PABPC1,CRTAM,COL19A1,APELA,MDGA2,STT3A,TRPM3,SLC39A8,ROR1,SLC16A9,GALNT2,FUT8,TET1,ARNT2,ASB3,HECW2,CDH2,CNTN5,ITGA8,SEL1L2,FBXL20,NTN4,RAD9A,XRN2,PHLPP1,GPR137B,RNU6-929P,EPHB1,RP1L1,ZDHHC18,GRM5,DDX10,ADCK1,RAI14,GDAP1L1,SPOPL,ZNF705D,RPS6KA5,SPTB,TBC1D1,LRRC69,PTPRG,PID1,NRP1,MIDEAS,FCHSD2,SDK1,PRKCA,GBP4,IFT46,MRPL58,COX10,ATPSCKMT,FAIM,RNF215,SAMD12,USP24,FAAP24,MOGAT3,FHIT,ITGA1,ZNF615,PCCA,CROT,KLF12,RNF138,RC3H1,NRIP1,CHODL,POR,ZNF850,ZNF235,ABCA6,SLC14A1,EFL1,MCC,ZNF738,SUPT3H,BCR,TUT4,NRXN3,ELMO1,RGS6,RERG,ZNF215,TCERG1L,KIF16B,CDH12,PRIM2,SNRK,C14ORF39,ARFGAP3,TM9SF2,USP49,ELP2,CFAP70,FBLN1,STK36,NSG2,PAQR5,MB,RAG1,KCNJ6,B9D1,DGCR2,DNPEP,CYP4B1,RRAS2,GNA14,ZNF678,BMPER,RABL2A,PRDM15,CUX1,DPP6,SRGAP3,SLC35F1,ZNF420,MACROH2A1,MITF,EPHB2,TSPAN13,TOGARAM1,CSNK1G1,SACS,BCL2L13,RNF11,CD38,EYA4,CHCHD3,DPH6,MYO5B,RGPD4,PPIL2,CDK14,AKAIN1,MET,MUC16,SPPL3,DLG2,CDH17,Z </p> |
|--|--|--------------------------------------------------------------------------------------------------------------------------------------------------------------------------------------------------------------------------------------------------------------------------------------------------------------------------------------------------------------------------------------------------------------------------------------------------------------------------------------------------------------------------------------------------------------------------------------------------------------------------------------------------------------------------------------------------------------------------------------------------------------------------------------------------------------------------------------------------------------------------------------------------------------------------------------------------------------------------------------------------------------------------------------------------------------------------------------------------------------------------------------------------------------------------------------------------------------------------------------------------------------------------------------------------------------------------------------------------------------------------------------------------------------------------------------------------------------------------------------------------------------------------------------------------------------------------------------------------------------------------------------------------------------------------------------------------------------------------------------------------------------------------------------------------------------------------------------------------------------------------------------------------------------------------------------------------------------------------------------------------------------------------------------------------------------------------------------------------------------------------------------------------------------------------------------------------------------------------------------------------------------------------------------------------------------------------------------------------------------------------------------------------------------------------------------------------------------------------------------------------------------------------------------------------------------------------------------------------------------------------------------------------------------------------------------------------------------------------------------------------------------------------------------------------------------------------------------------------------------------------------------------------------------------------------------------------------------------------------------------------------------------------------------------------------------------------------------------------------------------------------------------------------------------------------------------------------------------------------------------------------------------------------------------------------------------------------------------------------------------------------------------------------------------------------------|

|            |                                                    |                          |                                                                                                                                                                                                                                                                                                                                                                                                                                                                                                                                                                                                                                                                                                                                                                                                                                                                                                                                                                                                                                                                                                                                                                                                                                                                                                                                                                                                                                                                                                                                                                                                                                                                                                                                                                                                                                                                                                                                               |
|------------|----------------------------------------------------|--------------------------|-----------------------------------------------------------------------------------------------------------------------------------------------------------------------------------------------------------------------------------------------------------------------------------------------------------------------------------------------------------------------------------------------------------------------------------------------------------------------------------------------------------------------------------------------------------------------------------------------------------------------------------------------------------------------------------------------------------------------------------------------------------------------------------------------------------------------------------------------------------------------------------------------------------------------------------------------------------------------------------------------------------------------------------------------------------------------------------------------------------------------------------------------------------------------------------------------------------------------------------------------------------------------------------------------------------------------------------------------------------------------------------------------------------------------------------------------------------------------------------------------------------------------------------------------------------------------------------------------------------------------------------------------------------------------------------------------------------------------------------------------------------------------------------------------------------------------------------------------------------------------------------------------------------------------------------------------|
|            |                                                    |                          | <p>NF705B,ATP6V0D2,SPECC1,CAMK1G,IBA57,METTL15,PPFIA2,CDH13,MED13L,STXBP4,SERPINB2,CACNG3,ATG5,USP32,NRAP,MAGI2,SLC35F4,PRDM11,VMP1,UNK,AIFM3,FAM171A1,MLIP,FLRT2,MYB,KALRN,ME3,ZNF704,SLC1A2,CHST3,GNAS,LAMA1,MFHAS1,SERPINB7,CA10,CPQ,NUP43,TRIM9,ATRNL1,TIAM2,DHX29,IGSF21,BMP7,TTC28,ASTN2,DLG5,TNFAIP8,ZMYND8,GAPVD1,GABRA2,RNF217,KIRREL3,KCTD1,BTD,GOLGA6A,OR2T2,DNAH3,ZNF74,BPTF,BTBD10,AK3,ZMYND11,TMEM25,NUDT21,TRAPPC10,GRM3,KMT2C,DDX6,ADGRF5,OR4N2,PDGFC,WDR41,DNAH17,PLIN2,PPP1R13B,ELOVL7,EPB41L4A,ABL2,MMP26,MRPL37,VPS13B,TRAPPC6B,BACE2,RFX2,PARPBP,NECAB1,PKNOX2,EYA1,FHOD3,PDZD2,TTL11,GOLGA8T,PRPF18,SLIT2,CMPK1,TMPRSS3,EXOC4,RNU6-</p> <p>835P,CNOT7,FAM126A,KCNIP4,ESCO1,KCTD8,CCDC141,PLCL1,ERBB4,IL20RB,FAM3B,FAM126B,GSAP,TRHDE,SYNDIG1,ROBO1,SAMD4A,PBX1,IRAG1,NPAS3,NUF2,PRKCQ,RGPD2,SAMM50,ANTXR1,NDRG1,SORCS2,SIPA1L3,TRDN,MGMT,ZNF679,NLGN1,CTTNBP2,AK9,SHLD2,NOS1,SLC6A3,GLDC,CHD9,PRR16,ASIC2,EFNA5,TCF12,GAS2L1,ARHGEF11,MTREX,VCAN,RAB27A,NSD1,EHMT1,SLIT3,USP31,DTNA,KIF13A,AP5M1,FRMD5,ESR1,DNAH9,SLC25A48,MYO9B,NTNG1,KDM4B,CYP2C8,KCNQ5,LOXL2,CACNA2D1,NYAP2,IGLC3,IQCJ-</p> <p>SCHIP1,FRMD4B,IRAG2,ADGRG7,ORC4,SKAP2,PRLR,PIGB,AGO3,HTT,LARS2,ZDHHC11B,FOXB1,RAD51B,CAMK1D,PIK3R3,SLC25A18,MACROD2,CFAP44,CDKAL1,OPCML,CATSPERE,AK2,HLA-F,FER,ZNF302,EVA1A,EYA2,KATNIP,CCR2,RPGRIPI,STARD13,PITPNM3,OSBPL5,INTS12,A2M,FGGY,WDFY3,CHFR,ZNF721,PCMT1,EPS8,OSBPL6,AUH,JAZF1,ZNF578,OARD1,ZNF891,SPOCK3,SEMA4B,NRF1,IGHV10R21-</p> <p>1,ZNF14,ANO2,HRH1,PHC2,GRIA4,AGAP1,ROCK2,PRDM1,RORA,STMP1,IL16,ATAT1,TERB2,NARS2,DMRT1,EIF4G3,CDCA5,PP1CB,CATSPER2,RGS8,RAB31,PDK1,HSPG2,PSMD2,PTPRQ,CSMD3,HERPUD1,NCOA6,TRIM2,HSD17B2,COL4A3,WASHC1,ZFP30,RGS7,HOKK3,KIF7,GNG2,PCSK2,FSTL4,CLDN10,BARD1,CLCN5,PNPLA3,STK3,DEPTOR,ZNF423,SLC13A4,C1QL3,RSU1,PNPLA8,ZNF568,HNRNPU,LINC00240,VTI1A,CEP72,RAB3GAP2,CADPS,APCDD1,IGF1R,KCNAB1,MEG8,PRKAG2,GLI2,THRB,TANGO2,LSAMP,AKAP13,MORC3,ATP10A,SEPTIN6,DNM1L</p> |
| GO:2000026 | regulation of multicellular organismal development | 0.0000011461631116736055 | <p>NOTCH2,MTOR,PTPRD,ULK2,PLCB1,TAF45,ZFPM2,TENM4,ZDHC21,FBN1,CHRNA7,ROBO2,ZEB1,RARB,SPRED1,MINAR1,FOXJ2,ANO6,DSCAM,SOX5,RFX3,MACF1,BCL11A,SOX6,CDH4,NTRK3,C5,FLT1,SLC39A12,PRKD1,EPHA7,SPEN,RAPGEF2,LRP2,ADGRB3,RUNX2,COL4A2,ADAM10,STAU2,SEMA5A,VCL,SLC8A1,FIG4,BMPRI1B,AKAP6,ARNT,PAK3,DIP2B,ITPKB,TRPC5,PRKCZ,YAP1,BRINP1,NIPBL,GABPA,PAFAH1B1,EFEMP1,ITGB8,NF2,CTNNA1,PPARA,MEIS2,PRTG,SYNJ1,TIAM1,SEMA3C,AGO2,JARID2,IL34,ADGRV1,WNT9B,SEMA6D,SMARCA4,PARD3,TNR,CXADR,ABLI,DROSHA,CAMK4,FGF10,GRID2,NRG1,INO80D,ASPM,AP3B1,ATP11C,ZBTB16,ZNF675,FBN2,EGF,SPRED2,PTPN2,PLXNA2,AMBRA1,OPRM1,FANCA,SEMA3E,LINGO2,EPN2,ADAM12,EMILIN2,HMGA2,MBP,TRPS1,TJP1,HLA-B,DISC1,WDFCP,SEMA3A,BMP2,RC3H2,PSG9,GFI1B,BMP2K,SEMA3D,RELN,HMGB1,FGF9,ESRP1,NIN,DRAXIN,SMARCA2,ETS1,GLI3,SMARCC1,SMOC2,MAP2,ATF2,CFTR,NELL1,KITLG,DCC,GTFF2I,TADA2A,DAB1,MTMR2,TBX20,PRKCH,TG,RACGAP1,TOX,ROCK1,LYN,DTX1,OVOL2,NTN1,DPYSL5,ARID1B,INSR,SNAI2,XRG,JCAD,ENPP1,RASGRP1,CSF1,CTDP1,LAMA3,INO80,CNMD,MYCL,TNN,MED1,IL33,AJAP1,ROR2,KL,TMEM178A,IL10,ACTR2,CLSTN2,PTH,MAP6,NRXN1,PCID2,HIPK1,TWIST1,AKT3,RBM19,UFL1,NFKBIA,PRKCB,ABCC8,NEDD9,ATP2B1,AGO1,STAT1,CCBE1,MEF2C,ADGRB1,RXRA,WNT7A,NDFIP1,WASF3,FBXW8,EPHA4,NTRK2,IL1RAPL1,NUMB,ADAMTS9,WNT2B,CD101,FBXO31,CDH5,NFKBID,CLDN18,CYFIP1,SEMA4D,JAM2,FAT4,RUNX1,PDCL3,GPR55,TNFSF11,ADGRL2,HDAC2,CRTAM,APELA,GPR137B,EPHB1,GRM5,NRP1,PRKCA,FAIM,RC3H1,CHODL,POR,RAG1,BMPER,CUX1,MACROH2A1,MITF,EPHB2,FLRT2,MYB,KALRN,LAMA1,</p>                                                                                                                                                                                                                                                                                                                                                                                                                                                                            |

|            |                                                  |                          |                                                                                                                                                                                                                                                                                                                                                                                                                                                                                                                                                                                                                                                                                                                                                                                                                                                                                                                                                                                                                                                                                                                                                                                                                                                                                                                                                                                                                                                                                                                                                                                                                                                                                                                                                                                                                                                                                                                                                                                                                                                                      |
|------------|--------------------------------------------------|--------------------------|----------------------------------------------------------------------------------------------------------------------------------------------------------------------------------------------------------------------------------------------------------------------------------------------------------------------------------------------------------------------------------------------------------------------------------------------------------------------------------------------------------------------------------------------------------------------------------------------------------------------------------------------------------------------------------------------------------------------------------------------------------------------------------------------------------------------------------------------------------------------------------------------------------------------------------------------------------------------------------------------------------------------------------------------------------------------------------------------------------------------------------------------------------------------------------------------------------------------------------------------------------------------------------------------------------------------------------------------------------------------------------------------------------------------------------------------------------------------------------------------------------------------------------------------------------------------------------------------------------------------------------------------------------------------------------------------------------------------------------------------------------------------------------------------------------------------------------------------------------------------------------------------------------------------------------------------------------------------------------------------------------------------------------------------------------------------|
|            |                                                  |                          | <i>TIAM2, BMP7, DLG5, SLIT2, ERBB4, SYNDIG1, ROBO1, NLGN1, ASIC2, EFNA5, EHMT1, LOXL2, PRLR, CCR2, SEMA4B, ROCK2, PRDM1, HSPG2, COL4A3, HOOK3, FSTL4, GLI2</i>                                                                                                                                                                                                                                                                                                                                                                                                                                                                                                                                                                                                                                                                                                                                                                                                                                                                                                                                                                                                                                                                                                                                                                                                                                                                                                                                                                                                                                                                                                                                                                                                                                                                                                                                                                                                                                                                                                       |
| GO:0009719 | response to endogenous stimulus                  | 0.0000012348381768130318 | <i>NOTCH2, BCAR3, MTOR, NSG1, NLK, PLCB1, PTPRA, ITPR2, PDE4D, RDX, BCL2, MYO5A, PRDM16, FBN1, ROBO2, GABRB3, ZEB1, AKR1C3, RARB, SPRED1, ALK, APC, CRKL, SOX5, KDM4C, EGFR, NCOR1, NEDD4, BCL11A, SOX6, NTRK3, RXFP1, GABRB1, NEO1, PAK1, CHRM3, RAPGEF2, LRP2, RUNX2, ARSB, FGF12, CPS1, ONECUT1, CPEB4, TMEM38B, BCKDHB, UBE2L3, SMYD3, RPTOR, GHR, COL4A2, HDAC9, APP, GABRG2, NTF3, SLC8A1, KANK1, BMPR1B, PCSK6, AKAP6, RAB8B, LARP1, RAP1GDS1, PRKCZ, GRB10, RYR3, DEFA3, DUSP22, YAP1, MAPK1, HRH2, PAPP, PDGFD, UBE2O, SPIDR, GABPA, HRH4, ACSBG1, GLP2R, ITGB8, HIVEP1, CTNNA1, AKAP9, KLF15, PPARA, NR5A2, PTPRK, TRERF1, SLC24A4, VPS13C, TMEM108, BCAS3, RYR2, BBS2, SMARCA4, USP8, MBD5, ELAVL4, ABL1, PTPN12, HDAC4, SLC1A1, PRKAA1, RAP1A, FGF10, LATS2, PRKCE, ESRG, DENND4C, FBN2, CD44, PDE3A, EXT1, SPRED2, PTPN2, HTR2C, LTBP1, ZFYVE9, OPRM1, HTR2A, ALPL, FHL2, GNAL, NOS2, CCND3, MBP, CRIM1, FBXO32, LDLRAD4, BLM, AGL, BMP2, PSG9, SOGA1, GNAI1, TBC1D4, LEMD3, FGF9, ZNF106, DSTYK, RAP1GAP, GLI3, SMARCC1, SNX6, SMOC2, IDE, GAREM1, ATF2, UMODL1, BBS4, CFTR, RGM, UBR1, CHRM5, SLC30A10, SELENON, PTPRE, PRKN, TBX20, SNX25, SOX30, ROCK1, LYN, VCAM1, CTSB, EIF2B3, OVOL2, ZFHX3, RRAGD, ARID1B, INSR, TFF1, SNAI2, RXRG, NREP, CD9, ENPP1, BMP5, KCNC1, BCL2L1, SERPINB9, HCN1, GRB14, SMAD5, HADHA, MED1, KL, IL10, ACTR2, PTH, SOSTDC1, PRKAA2, ABHD2, VSTM2A, IQGAP1, SREBF2, NRXN1, PBLD, PEG10, JAK2, FSTL1, CREBBP, PCNA, UFL1, PRKCB, ABCC8, ATP2B1, ASS1, OTOF1, CIDEA, EXT2, STAT1, BRMS1L, NR2C1, IMPACT, PARK7, ITGA4, MYOCD, ACACA, MEF2C, RXRA, WNT7A, RBPM2, OR10H2, PDE2A, SDCBP, DSG1, WWOX, NCK1, C2, EPHA4, NTRK2, IL17RD, PTK2, CDH5, TPH2, DIAPH1, CYFIP1, UBE3A, FAT4, PTGFR, FYN, HDAC2, FUT8, TET1, ITGA8, GRM5, PID1, POR, RERG, KIF16B, NSG2, GNA14, BMPER, EPHB2, CD38, CDH13, STXBPA, MAGI2, FLRT2, SLC1A2, GNAS, BMP7, PDGFC, SLIT2, ERBB4, PRKCQ, NOS1, EFNA5, GAS2L1, SLIT3, ESR1, CACNA2D1, PRLR, PIK3R3, FER, A2M, HHRH1, ROCK2, RGS8, RAB31, NCOA6, GNG2, PNPLA3, ZNF423, HNRNP, U, IGF1R, THRB</i> |
| GO:0120031 | plasma membrane bounded cell projection assembly | 0.0000012879751542594827 | <i>MTOR, LRRC49, RIPOR2, RDX, RP1, RALA, ODAD2, SDCCAG8, FGD4, SPAG16, CDC42EP3, AUTS2, CARMIL1, PARVB, ANO6, MAP4, APC, PLPPR5, ARHGAP24, TNIK, RFX3, ARMC2, RAPGEF2, ONECUT1, LRGUK, SEPTIN9, DCLK1, STAU2, VCL, ARHGAP44, CD2AP, SRGAP2C, KANK1, DNM3, IFT57, COBL, YAP1, ABLIM1, BCAS3, SYNE2, BBS2, AIF1L, ABL1, HDAC4, DNAH5, MYO10, CEP83, PTPRO, IFT43, ARHGEF7, ABCC4, TMEM67, PLCE1, DISC1, WDPCP, DNAL1, NUDCD3, TTC21B, RAP1GAP, SRGAP2, DNAH8, DAW1, CYLD, BBS4, KIAA0753, PCDH15, VAV3, CFAP74, ROCK1, TENM2, NTN1, IFT81, FAM149B1, CDC14B, PCNT, ACTR2, TTC39C, NRXN1, CIBAR1, ANLN, CELSR2, GORAB, GAP43, BBS9, CEP120, WASF3, SDCBP, NCK1, DRC7, SNAP29, EMP1, RSPH1, OCLN, MARK4, CYFIP1, HOATZ, SAXO1, ASAP1, CCDC88A, ADAMTS16, SPAG6, ARL13B, HYDIN, RP1L1, NRP1, IFT46, CFAP70, STK36, B9D1, EPHB2, TOGARAM1, CDH13, ATG5, DNAH17, RFX2, SLIT2, NLGN1, HTT, CFAP44, FER, RRGIP1, EPS8, ATAT1, WASHC1, ZNF423, SEPTIN6</i>                                                                                                                                                                                                                                                                                                                                                                                                                                                                                                                                                                                                                                                                                                                                                                                                                                                                                                                                                                                                                                                                                                                     |
| GO:0007416 | synapse assembly                                 | 0.0000015154644759790474 | <i>PTPRD, IL1RAPL2, ROBO2, GABRB3, NEGR1, GPC6, DSCAM, CRKL, NTRK3, EPHA7, ADGRB3, APP, STAU2, GABRG2, SRGAP2C, DNM3, LRFN5, GRID2, NRG1, MUSK, LINGO2, PDLIM5, DNER, SRGAP2, FARP1, LGI2, SHANK2, NTN1, COLQ, CLSTN2, NRXN1, GAP43, MEF2C, ADGRB1, WNT7A, SDCBP, NECTIN1, NTRK2, IL1RAPL1, SEMA4D, ADGRL2, CDH2, CNTN5, EPHB1, SDK1, NRXN3, EPHB2, FLRT2, DLG5, GABRA2, KIRREL3, ERBB4, SYNDIG1, NLGN1, ASIC2, EFNA5</i>                                                                                                                                                                                                                                                                                                                                                                                                                                                                                                                                                                                                                                                                                                                                                                                                                                                                                                                                                                                                                                                                                                                                                                                                                                                                                                                                                                                                                                                                                                                                                                                                                                            |
| GO:0098609 | cell-cell adhesion                               | 0.000001958913588374222  | <i>CNTN4, PTPRD, LRRC4C, TLN2, TENM4, ZDHHC21, RIPOR2, RDX, STXBP1, BCL2, CDH8, ROBO2, TENM3, PCDH7, ASTN1, NEGR1, GPC6, HHLA2, DSCAM, ILDR2, EGFR, CTNNA3, CRB1, CDH4, NEO1, CNTN6, EPHA7, CCL28, DOCK8, VCL, CD2AP, IGSF5, CTNNA2, ITPKB, PRKCZ, DUSP22, ALCAM, PLG, FAT3, NF2, CTNNA1, CDH7, PPARA, PCDH11Y, MAGI1, ADGRV1, SMARCA4, CDH11, BLK, TNFR, CXADR, PTPRT, AB</i>                                                                                                                                                                                                                                                                                                                                                                                                                                                                                                                                                                                                                                                                                                                                                                                                                                                                                                                                                                                                                                                                                                                                                                                                                                                                                                                                                                                                                                                                                                                                                                                                                                                                                       |

|            |                                             |                          |                                                                                                                                                                                                                                                                                                                                                                                                                                                                                                                                                                                                                                                                                                                                                                                                                                                                                                                                                                                                                                                                                                                                                                                                                                                                                                                                                                                                                                                                                                                                                                                                                                                                                                                                                                                                                                                                                                                                                                                                                                                                                                                      |
|------------|---------------------------------------------|--------------------------|----------------------------------------------------------------------------------------------------------------------------------------------------------------------------------------------------------------------------------------------------------------------------------------------------------------------------------------------------------------------------------------------------------------------------------------------------------------------------------------------------------------------------------------------------------------------------------------------------------------------------------------------------------------------------------------------------------------------------------------------------------------------------------------------------------------------------------------------------------------------------------------------------------------------------------------------------------------------------------------------------------------------------------------------------------------------------------------------------------------------------------------------------------------------------------------------------------------------------------------------------------------------------------------------------------------------------------------------------------------------------------------------------------------------------------------------------------------------------------------------------------------------------------------------------------------------------------------------------------------------------------------------------------------------------------------------------------------------------------------------------------------------------------------------------------------------------------------------------------------------------------------------------------------------------------------------------------------------------------------------------------------------------------------------------------------------------------------------------------------------|
|            |                                             |                          | <p>L1, LRFN5, NFAT5, CDH18, MYO10, GRID2, CDHR3, NRG1, AP3B1, ZBTB16, CD44, EXT1, STXBP6, CTNND2, PTPN2, AMBRA1, LPP, STK10, ANK3, EMILIN2, MBP, FUT9, PCDH9, VAV1, CDH20, TJP1, NPHP4, CNTN1, PDLIM5, BMP2, RC3H2, UNC5D, NCAM2, HMGB1, SLAMF1, SMARCA2, ETS1, GLI3, MEGF11, SMARCC1, ITGA9, COL14A1, KITLG, DCC, DAB1, PCDH15, CDH23, PKP1, ROCK1, LYN, VCAM1, DTX1, TENM2, NTN1, ARID1B, CD9, RASGRP1, IGSF11, CDH26, BMP5, PRKG1, LAMA3, FAT1, IL10, CLSTN2, NRXN1, CD70, CADM1, JAK2, CELSR2, PCDH11X, ITGA6, ASS1, NECTIN4, ADAMTS18, ITGA4, HMCN1, CYFIP2, NDFIP1, NECTIN1, DSG1, NCK1, IL1RAPL1, FNDC3A, MEGF10, PTK2, CDH5, NFKBID, CLDN18, LAMB1, PCDH8, SEMA4D, JAM2, FAT4, RUNX1, KIRREL1, TNFSF11, FYN, PPM1F, CDH9, CRTAM, COL19A1, SLC39A8, CDH2, CNTN5, ITGA8, SDK1, PRKCA, ITGA1, RC3H1, NRXN3, CDH12, RAG1, DLG2, CDH17, CDH13, VMP1, MYB, GNAS, IGSF21, BMP7, ASTN2, DLG5, KIRREL3, ABL2, IL20RB, ROBO1, PRKCQ, NLGN1, EFNA5, NTNG1, FER, CCR2, CLDN10, GLI2</p>                                                                                                                                                                                                                                                                                                                                                                                                                                                                                                                                                                                                                                                                                                                                                                                                                                                                                                                                                                                                                                                                                                                                  |
| GO:0050770 | regulation of axonogenesis                  | 0.0000023179188937657035 | <p>LRRC4C, ULK2, ROBO2, DSCAM, MACF1, BCL11A, CDH4, PAK1, EPHA7, SEMA5A, PAK3, DIP2B, TRPC5, CHN1, PAFAH1B1, TIAM1, SEMA3C, SEMA6D, TNFR, PLXNA2, SEMA3E, MARK2, MBP, DISC1, SEMA3A, SEMA3D, UST, NIN, DRAXIN, MAP2, DCC, DAB1, NTN1, MAP6, WNT7A, EPHA4, NTRK2, CYFIP1, SEMA4D, CDH2, NRP1, CHODL, EPHB2, TIA M2, SLIT2, ROBO1, EFNA5, SEMA4B, FSTL4</p>                                                                                                                                                                                                                                                                                                                                                                                                                                                                                                                                                                                                                                                                                                                                                                                                                                                                                                                                                                                                                                                                                                                                                                                                                                                                                                                                                                                                                                                                                                                                                                                                                                                                                                                                                            |
| GO:0048585 | negative regulation of response to stimulus | 0.0000027503548345930766 | <p>MTOR, WWC1, PTPRD, NLK, ZNF536, TAF4A, DLC1, RIPOR2, PDE4D, BCL2, PRDM16, FBN1, ROBO2, SPRED1, MINAR1, MCTP1, ERBIN, MLT3, SUS4, APC, ARHGAP24, PTPRJ, EGFR, USP14, PRKACB, RGS3, NCOR1, NEDD4, SCAI, C5, DKK2, MAPKBP1, AOA, INVS, NCOA7, LRP2, RUNX2, TAOK3, ONCUT1, SAMSN1, USP18, SEMA5A, ARHGAP44, NDUFAF2, CD2AP, PTPRR, KANK1, HOMER2, CTNNA2, RGS20, PDE10A, KICS2, PRKCZ, GRB10, RGS9, HECW1, DUSP22, YAP1, USP25, PLG, ZNRF3, STK38, PAFAH1B1, NF2, CTNNA1, BIRC6, PPARA, PAK5, SEMA3C, SLC24A4, SEC14L1, VPS13C, ALPK2, BBS2, SEMA6D, DUSP16, SMARCA4, MAPKAP1, TNFR, PTPRT, ABL1, PTPN12, OXR1, PRKAA1, LRFN5, FGF10, GRID2, LATS2, NRG1, ZNF675, NXN, WNK2, FBN2, CD44, RGS12, PTPRO, PDE3A, LIMD1, SPRED2, PTPN2, CD96, LTBP1, OPRM1, KREMEN1, SEMA3E, FHL2, HIPK3, EPN2, GRK3, MOSMO, HMGA2, CRIM1, PRR5L, LDLRAD4, NPHP4, HLA-B, SEMA3A, BMP2, RC3H2, RANBP9, RIN3, TMEM161A, SEMA3D, LEMD3, ARHGAP42, FGF9, DRAXIN, SLAMF1, GLI3, CGAS, SNX6, CNKSR3, CYLD, BBS4, MAPK8IP1, UBASH3A, UBR1, RCAN1, DAB1, RB1CC1, PTPRE, PRKN, MTMR2, TBX20, NLRC5, SNX25, SHANK2, PSMA1, ENPP3, SOX30, KIR2DL4, LYN, OVOL2, RNF152, OTUD7A, YTHDF3, SNAI2, ASH1L, BID, SIAH2, TRABD2B, UFD1, CD9, SAMHD1, ENPP1, NDRG2, CSNK2A1, BMP5, BCL2L1, SERPINB9, PRKG1, GRB14, FANCB, DHRS3, CELF4, PRAME, TNN, IL33, AJAP1, BANK1, IL10, SOSTDC1, PRKAA2, ITPRIP, YBX3, NRXN1, PBLD, PEG10, TWIST1, UFL1, NFKBIA, PRKCB, ABCC8, BRD4, ITGA6, OTOP1, CIDEA, STAT1, BRMS1L, DGKG, PARK7, ADAMTS18, MYOCD, RBPMS2, NDFIP1, C16ORF72, PDE2A, WWOX, NCK1, FGR, PPP2R3A, EPHA4, MECOM, SHISA6, IL17RD, CDH5, ANKRD6, ARHGAP12, SEMA4D, AMFR, NENF, BICD1, FYN, RBMS3, HDAC2, ZFYVE28, APELA, TET1, CDH2, PHLPP1, GRM5, TB C1D1, PID1, NRP1, FAIM, ITGA1, RC3H1, MCC, BCR, RGS6, FBLN1, BMPER, PRDM15, MACROH2A1, EPHB2, EYA4, MET, SERPIN2B, ATG5, MAGI2, MLIP, MFHAS1, BMP7, DLG5, ZMYND11, TMEM25, WDR41, ABL2, MMP26, PARPBP, EYA1, SLIT2, CNOT7, IL20RB, ROBO1, PRKCQ, SHLD2, SLC6A3, SLIT3, ESR1, HTT, HLA-F, FER, EYA2, CCR2, A2M, SEMA4B, RORA, RGS8, HERPUD1, RGS7, KIF7, FSTL4, STK3, DEPTOR, APCDD1, IGF1R, GLI2</p> |
| GO:0007610 | behavior                                    | 0.000003004718054374706  | <p>MTOR, PLCB1, BCL2, CHRNA7, NAV2, ALK, PJA2, ASTN1, NEGR1, CNTAP2, DSCAM, SLC4A10, EGFR, NCOR1, BTBD9, DGKI, GRIA1, SLC8A3, ADGRB3, FGF12, RPTOR, APP, GABRG2, NTF3, FIG4, TAF4A, HOMER2, KCNK10, PRKCZ, KLHL1, BRINP1, MAPK1, ADAM22, SLC16A1, SORCS3, PAFAH1B1, PPARA, MEIS2, SYNJ1, GRM1, PAK5, SLC24A4, DNAH11, SCN2A, TANC1, BBS2, TNFR, MBD5, ELAVL4, ABL1, HADC4, OXR1, SLC1A1, PRKAA1, MORC1, CAMK4, NRG1, RASGRP1, MUSK, PRKCE, EXT1, ATP8A2, HTR2C, ATP8A1, OPRM1, HTR2A, PUM1, TMOD2, APBA2, KCND2, ANKFN1, NPHP4, CNTN1, STRN, RELN, TTC21B</p>                                                                                                                                                                                                                                                                                                                                                                                                                                                                                                                                                                                                                                                                                                                                                                                                                                                                                                                                                                                                                                                                                                                                                                                                                                                                                                                                                                                                                                                                                                                                                        |

|            |                         |                         |                                                                                                                                                                                                                                                                                                                                                                                                                                                                                                                                                                                                                                                                                                                                                                                                                                                                                                                                                                                                                                                                                                                                                                                                                                                                                                                                                                                                                                                                                                                                                                                                                                                                                                                                                                                                                                                                                                            |
|------------|-------------------------|-------------------------|------------------------------------------------------------------------------------------------------------------------------------------------------------------------------------------------------------------------------------------------------------------------------------------------------------------------------------------------------------------------------------------------------------------------------------------------------------------------------------------------------------------------------------------------------------------------------------------------------------------------------------------------------------------------------------------------------------------------------------------------------------------------------------------------------------------------------------------------------------------------------------------------------------------------------------------------------------------------------------------------------------------------------------------------------------------------------------------------------------------------------------------------------------------------------------------------------------------------------------------------------------------------------------------------------------------------------------------------------------------------------------------------------------------------------------------------------------------------------------------------------------------------------------------------------------------------------------------------------------------------------------------------------------------------------------------------------------------------------------------------------------------------------------------------------------------------------------------------------------------------------------------------------------|
|            |                         |                         | ,GLI3,GRIK2,BBS4,RCAN1,DAB1,PRKN,DACH1,PCDH15,GRIN2A,ATXN1,CDH23,ALS2,SHANK2,NPAS2,ZFH3,INSR,GRID1,NMU,PBX3,GHRH,GRIN2B,OTOG,LMX1A,ACTR2,NRXN1,HCRT1,ABCC8,NEDD9,SLC6A1,PARK7,CSMD1,MEF2C,S100B,FOXO6,EPHA4,GABRA5,NTRK2,UBE3A,AMFR,FYN,HDAC2,ITGA8,FBXL20,GRM5,SDK1,NRXN3,RAG1,EPHB2,SPECC1,KALRN,SLC1A2,KIRREL3,ABL2,NLGN1,SLC6A3,HTT,FOXB1,EPS8,HRH1,THRB                                                                                                                                                                                                                                                                                                                                                                                                                                                                                                                                                                                                                                                                                                                                                                                                                                                                                                                                                                                                                                                                                                                                                                                                                                                                                                                                                                                                                                                                                                                                               |
| GO:0040007 | growth                  | 0.000003616477094418389 | NOTCH2,MTOR,SPOCK1,WWC1,LRP12,BNC2,ULK2,SCAPER,FTO,PLCB1,ZFPM2,TENM4,BCL2,RIMS1,RARB,MINAR1,RIMS2,AUTS2,PAPPA2,DSCAM,CRKL,SLC4A10,PTPRJ,EGFR,MACF1,BCL11A,TMEM182,CDH4,LARGE1,EPHA7,TMEM38B,RPTOR,GHR,EPB41L3,NEDD4L,ADAM10,APP,DCLK1,SEMA5A,SYT1,VCL,AURKA,BMPR1B,AKAP6,RFTN1,DIP2B,TRPC5,NBN,PRKCZ,COL27A1,COBL,YAP1,ALCAM,PLG,NRG3,NIPBL,FMN1,PAFAH1B1,DCAF1,PPARA,PAK5,SEMA3C,TMEM108,JARID2,BBS2,SEMA6D,SMARCA4,MAPKAP1,TNR,CXADR,MBD5,ATRX,ABL1,PTPN12,GAS2,CREG1,FGF10,LATS2,NRG1,ASPM,MUSK,EXT1,RPS6KA3,ATP8A2,SEMA3E,APBA2,CDKN2C,EVC,AFG3L2,HMGA2,PLCE1,CRIM1,PDLIM5,BRCA2,DISC1,SEMA3A,RC3H2,SEMA3D,FGF9,SLC23A2,PLS1,NIN,DRAXIN,SMARCA2,GLI3,MAP2,ATF2,BBS4,KPNA1,DCC,SELENOX,PRKN,TBX20,PCDH15,ARID5B,FBLN5,ITSN2,PTGFRN,NTN1,INSR,COLQ,CD9,ENPP1,IGSF11,CSNK2A1,CSF1,GHRH,BCL2L1,CTDP1,INO80,PRAME,TNN,PSAP,MED1,KDM6A,ATRN,LMX1A,IQGAP1,TEAD1,YBX3,NET1,PRSS2,NEDD9,GAP43,HEPACAM,BRMS1L,MTPN,IMPACT,ITGA4,NCAPG2,MYOCD,CYFIP2,MEF2C,WNTR7A,SDCBP,FLVCR1,PPP2R3A,EXTL3,CYFIP1,UBE3A,SEMA4D,RUNX1,SORBS2,SPAG6,PPM1F,EYS,NRP1,POR,RERG,CD38,MAGI2,PRDM11,SLC1A2,GNAS,CPQ,SLIT2,ERBB4,PRKCQ,SLC6A3,EFNA5,ARHGEF11,SLIT3,ESR1,PRLR,RAD51B,SEMA4B,FSTL4,STK3,GLI2,AKAP13                                                                                                                                                                                                                                                                                                                                                                                                                                                                                                                                                                                                                                                                                                                        |
| GO:0055085 | transmembrane transport | 0.000004334513245296101 | UNC80,CACNA2D3,SLC17A1,ABCA13,SLC24A2,KCNH5,MICU2,SLC25A21,LONP2,CLTCL1,SLC37A1,PIEZO2,DPP10,ITPR2,PDE4D,SLC44A5,BCL2,KCNMA1,CHRNA7,GABRB3,SV2C,ANO6,CACNG2,SLC4A10,OCA2,NEDD4,GRIK3,ATP2B2,TUSC3,GABRB1,GRI1A1,SLC39A12,SLC8A3,PRKD1,CHRM3,LRP2,FGF12,GABRA6,TMEM38B,SLC24A3,SLC44A1,TMEM241,THADA,NEDD4L,TRPM1,SLC39A11,APP,SLC7A2,ABCB5,CACNA1C,CACNB2,GABRG2,TMC1,SLC8A1,ABCG8,KCNE4,ABCD2,AKAP6,KCNK10,TRPC5,CLIC6,GRB10,RYR3,HECW1,ABCA5,SV2B,KCNJ1,ABCD3,TRPC7,SLC16A1,NIPAL2,MICU1,LRRRC38,GRIK4,AKAP9,KLF15,RASGRF2,KCNK3,GRM1,GABRG1,DAPK1,SLC24A4,SCN2A,DNAJC15,ANK2,RYR2,SLC9C1,SLC36A1,ABL1,SLC1A1,SLC12A8,KCNH1,ANO4,SLC46A3,GRID2,GSG1L,RASGRF1,ATP11C,ABCB7,ABCC12,PRKCE,SLC3A1,SLMAP,WNK2,ABCC9,P2RX6,PEX14,HTR2C,SLC2A3,ALG10B,ATP8A1,OPRM1,ABCC4,HTR2A,CYBRD1,CNNM4,STAC,CN1H3,MAIP1,SLC2A13,KCND2,ABCA10,AFG3L2,ANK3,NIPA2,TMC7,TMEM163,ATP6V1E1,CACNA1I,KCNJ15,SLC10A7,SCN11A,SLC15A5,NETO2,RELN,SLC23A2,SLC39A6,KCNH8,SLC37A2,SLC9A4,GABRR2,CNKSR3,GRIK2,PEX6,LRRRC8B,CFTR,SLC30A10,SELENOX,GRIN2A,JPH1,TRPM6,SLC12A1,OSCP1,KCNQ3,SHISA9,SLC4A4,SCN10A,KCND3,KCNN3,LYN,SLC44A2,SLC15A2,SLC13A5,CRACR2A,INSR,CUL5,GRID1,COX5A,ABCA4,GABRG3,ZDHC17,SLC22A14,ENPP1,UTRN,KCNC1,HCN1,GRIN2B,ABCG1,KCNK5,SLC40A1,SLC5A12,PTH,SLC25A52,COX7A2L,LASP1,NRXN1,TWIST1,SLC1A7,TRPV5,PRKCB,ABCC8,CACNA1E,ATP2B1,SLC14A2,CLCA4,OTOP1,SLC6A1,SHROOM2,SLC6A11,KCNJ18,CEMP,CBLIF,PARK7,OAZ2,ADCYAP1R1,ATP13A3,MEF2C,SLC5A9,ATP6V1C2,SLC10A6,FLVCR1,ATP6V1B2,GABRA5,OCNL,SHISA6,TRPM7,GRIK1,MFSD9,DIAPH1,APOL1,SCARA5,SLC26A2,NOS1A,P,SLC9A5,SLC5A1,ANO10,FYN,SCN8A,TMEM63C,NC1S1,ATP5PF,NALCN,TRPM3,SLC39A8,SLC16A9,HECW2,GRM5,PID1,ATPSCMT,ABCA6,SLC14A1,BCR,KCNJ6,DPP6,SLC35F1,EPHB2,TSPAN13,CDH17,ATP6V0D2,STXBP4,CACNG3,ATG5,SLC35F4,VMP1,SLC1A2,GABRA2,KCNIP4,TRDN,NLGN1,NOS1,SLC6A3,ASIC2,SLC25A48,KCNQ5,CACNA2D1,HTT,SLC25A18,CCR2,ANO2,GRIA4,CATSPER2,RGS7,CLCN5,SLC13A4,KCNAB1,PRKAG2,ATP10A |

|            |                                              |                         |                                                                                                                                                                                                                                                                                                                                                                                                                                                                                                                                                                                                                                                                                                                                                                                                                                                                                                                                                                                                                                                                                                                                                                                                                                                                                                                                                                                                                                                                                                                                                                                                                                                                                                                                                                         |
|------------|----------------------------------------------|-------------------------|-------------------------------------------------------------------------------------------------------------------------------------------------------------------------------------------------------------------------------------------------------------------------------------------------------------------------------------------------------------------------------------------------------------------------------------------------------------------------------------------------------------------------------------------------------------------------------------------------------------------------------------------------------------------------------------------------------------------------------------------------------------------------------------------------------------------------------------------------------------------------------------------------------------------------------------------------------------------------------------------------------------------------------------------------------------------------------------------------------------------------------------------------------------------------------------------------------------------------------------------------------------------------------------------------------------------------------------------------------------------------------------------------------------------------------------------------------------------------------------------------------------------------------------------------------------------------------------------------------------------------------------------------------------------------------------------------------------------------------------------------------------------------|
| GO:0007017 | microtubule-based process                    | 0.000004715262652334339 | LRRC49,RIPOR2,RP1,ODAD2,SPIRE1,CNTLN,SDCCAG8,SPAG16,CEP192,MAP4,APC,SETD2,RFX3,MACF1,NEK7,NCOR1,ARMC2,SLC39A12,PAK1,DEUP1,LRGUK,DNAH6,KIF4A,TBCD,APP,DCLK1,STAU2,MAPRE2,AURKA,TTC29,SRGAP2C,CCSER2,FMN2,TTL7,IFT57,PRKCZ,MCPH1,RAB27B,SENP6,DNAH14,SLC16A1,PAFAH1B1,AKAP9,PARD3B,NAV3,TMEM108,DNAH11,STAG2,BCAS3,SYNE2,BBS2,SLC9C1,PARD3,DST,ATRX,ABL1,PRKAA1,TTL5,DNAH5,FGF10,CLIP1,ASPM,AP3B1,USP33,PEX14,IFT43,ATXN3,ARHGEF7,MARK2,TMEM67,C10ORF90,CFAP61,ANKFN1,NPHP4,CACNA1I,BRCA2,DISC1,WDPCP,ADCY10,TRAK1,GNAI1,RANBP9,DNAL1,TUBGCP3,RTTN,MDM1,TTC21B,SRGAP2,NIN,HAUS6,DNAH8,KIF21A,KIF15,MAP2,DAW1,NEK10,GOLGA8B,CYLD,BBS4,KIAA0753,CEP44,RACGAP1,MAP7,SYBU,CFAP74,ROCK1,KIF11,NEK6,PDE4DIP,ASH1L,TRIM58,FYCO1,SLC22A14,IFT81,RASGRP1,HDGFL3,INO80,KIF21B,CABYR,CDC14B,PCNT,ACTR2,SFPQ,PRKAA2,SKA1,NDC80,MAP6,TACC2,KIFC1,CENPE,TUBB6,CELSR2,TNKS,SGO1,KIF6,MTCL1,EML1,CEP120,DRC7,CDCA8,INTS13,RSPH1,OCN,CTN1,MARK4,CDH5,DIAPH1,HOATZ,DNAH10,SAXO1,CCDC88A,SPAG6,BICD1,HYDIN,RP1L1,IFT46,KIF16B,CFAP70,STK36,TOGARAM1,MET,DLG2,DNAH3,DNAH17,TTL11,NUF2,TRDN,EFNA5,GAS2L1,KIF13A,DNAH9,HTT,CFAP44,CATSPERE,FER,KATNIP,ROCK2,ATAT1,CATSPER2,HOKK3,KIF7,HNRNPU,CEP72                                                                                                                                                                                                                                                                                                                                                                                                                                                                                                                                                                                              |
| GO:0044093 | positive regulation of molecular function    | 0.00000490241436882678  | BCAR3,MTOR,GARNL3,TRAPPC9,MYO9A,DLC1,RIPOR2,ERC1,BCL2,CHRNA7,ALK,FANK1,CACNG2,EGLN3,SPON1,CRKL,ARHGAP24,DOCK10,EGFR,DENND1A,ANGPT1,NEK7,RNF220,NTRK3,RXFP1,FLT1,RFC3,PRKD1,PAK1,EPHA7,RALGPS1,RAPGEF2,TAOK3,UBE2L3,RPTOR,GHR,RALGAP1,RAPGEF5,APP,CACNA1C,CACNB2,DOCK8,MAPRE2,NTF3,ACER2,PARN,ST18,MAP4K4,BMPR1B,AKAP6,RANBP2,RAP1GDS1,NBN,IFT57,PRKCZ,MSH6,EBF2,RIPK4,MAPK1,RABGAP1L,PDGFD,NRG3,TBC1D22A,CHN1,TPM1,LRRC38,MOB3B,AKAP9,RASGRF2,RGL1,TIAM1,ARAP2,EIF3D,DAPK1,TBC1D9,IL34,ANK2,BCAS3,RYR2,WNT9B,CLPX,SMARCA4,TBC1D5,BLK,ABL1,HDAC4,SLC1A1,RAP1A,FGF10,NRG1,RASGRF1,MUSK,SLCO3A1,ASAP2,WNK2,USP33,CD44,EGF,PRRC1,TRIM5,ARHGEF7,ALG10B,AMBRA1,HTR2A,STAC,MARK2,MSH2,EPHA6,CALSPN,NOS2,MNAT1,ANK3,HMGA2,CCND3,MBP,TGFA,HIP1,VAV1,IQSEC1,BMP2,EVI5,RALGAP2,SGSM1,TBC1D4,RELN,ARHGAP42,HMGB1,GNAQ,DSTYK,RAP1GAP,SRGAP2,CNKSR3,IDE,ZNF618,NEK10,MOB1B,ATF2,CFTF,TBC1D13,KITLG,DAB1,NMD3,PRKN,NGEF,GRIN2A,ARID5B,PRKCH,IL6R,ALS2,TDFD1,DOCK9,COPS8,VAV3,RALB,ROCK1,LYN,CRACR2A,INSR,XRCC4,BID,ERN2,MBTPS2,CARD10,RALGPS2,RASGRP1,SNX9,KCNC1,CSF1,GRIN2B,DCUN1D4,PSAP,CDC14B,GPRC5C,ROR2,RASGEF1C,IL10,PTH,LARP6,IQGAP1,ANP32B,NRXN1,CENPE,NET1,SIPA1L2,TWIST1,ALKAL2,JAK2,MADD,TNKS,PCNA,PRKCB,ABCC8,ZC3H15,RFC2,NEDD9,ITGA6,PDP2,MAP2K6,MTPN,ABI1,CEMIP,EPHA6,MAPK8,ADCYAP1R1,RAPGEF4,MYOCD,CYFIP2,MEF2C,RXRA,MAP3K5,MAP3K4,DBF4B,FGR,EPHA4,NTRK2,PTK2,SEMA4D,RASGEF1B,AMFR,ASAP1,NOS1AP,CCDC88A,GPR55,TNFSF11,FYN,PPM1F,HDAC2,DOCK3,NCS1,ROR1,EPHB1,GRM5,RPS6KA5,TBC1D1,NRP1,ATPCKMT,ITGA1,POR,BCR,RGS6,PRIM2,FBLN1,STK36,EPHB2,BCL2L13,MET,SPPL3,CACNG3,MAGI2,VMP1,KALRN,GNAS,TIAM2,PDGFC,WDR41,ABL2,PLCL1,ERBB4,ROBO1,PRKCQ,ANTXR1,SIPA1L3,TRDN,NOS1,EFNA5,ESR1,CACNA2D1,PRLR,HTT,CAMK1D,FER,CCR2,ROCK2,RGS8,COL4A3,RGS7,STK3,RSU1,HNRNPU,IGF1R,PRKAG2,AKAP13 |
| GO:0051094 | positive regulation of developmental process | 0.000005289866595831649 | NOTCH2,BRINP3,MTOR,PTPRD,PLCB1,ZFPM2,TENM4,RIPOR2,RALA,BCL2,CHRNA7,ROBO2,RIMS1,SPIRE1,ZEB1,RIMS2,ALK,CARMIL1,RIN2,ANO6,DSCAM,TCF4,CRKL,SOX5,RFX3,MACF1,BCL11A,SOX6,CDH4,C5,FLT1,SLC39A12,PRKD1,SPEN,RAPGEF2,LRP2,ADGRB3,RUNX2,GHR,SSBP3,NEDD4L,ZHX3,STAU2,SEMA5A,SYT1,AURKA,SLC8A1,BMPR1B,AKAP6,ARNT,PAK3,ITPKB,ITPC5,PRKCZ,COBL,YAP1,BRINP1,NIPBL,MYLK3,PAFAH1B1,ITGB8,NF2,MRTFB,SYNJ1,TIAM1,AGO2,IL34,ADGRV1,BBS2,RANBP3L,SMARCA4,ELAVL4,ABL1,PRKAA1,RAP1A,FGF10,GRID2,NR                                                                                                                                                                                                                                                                                                                                                                                                                                                                                                                                                                                                                                                                                                                                                                                                                                                                                                                                                                                                                                                                                                                                                                                                                                                                                             |

|            |                                           |                         |                                                                                                                                                                                                                                                                                                                                                                                                                                                                                                                                                                                                                                                                                                                                                                                                                                                                                                                                                                                                                                                                                                                                                                                                                                                                                                                                                                                                                                                                                                                                                                                                                                                                                                                                                                                                                                                                                                                                                                                                                                                                                                                                                                                                                                                                                                                                                                                                                                                                                                                                                                                                                                                                                                                                                                                                      |
|------------|-------------------------------------------|-------------------------|------------------------------------------------------------------------------------------------------------------------------------------------------------------------------------------------------------------------------------------------------------------------------------------------------------------------------------------------------------------------------------------------------------------------------------------------------------------------------------------------------------------------------------------------------------------------------------------------------------------------------------------------------------------------------------------------------------------------------------------------------------------------------------------------------------------------------------------------------------------------------------------------------------------------------------------------------------------------------------------------------------------------------------------------------------------------------------------------------------------------------------------------------------------------------------------------------------------------------------------------------------------------------------------------------------------------------------------------------------------------------------------------------------------------------------------------------------------------------------------------------------------------------------------------------------------------------------------------------------------------------------------------------------------------------------------------------------------------------------------------------------------------------------------------------------------------------------------------------------------------------------------------------------------------------------------------------------------------------------------------------------------------------------------------------------------------------------------------------------------------------------------------------------------------------------------------------------------------------------------------------------------------------------------------------------------------------------------------------------------------------------------------------------------------------------------------------------------------------------------------------------------------------------------------------------------------------------------------------------------------------------------------------------------------------------------------------------------------------------------------------------------------------------------------------|
|            |                                           |                         | <p>G1, ASPM, AP3B1, ATP11C, ZBTB16, SH3GL3, FBN2, EGF, PDE3A, RPS6KA3, ATP8A2, PLXNA2, HTR2C, ARHGEF7, AMBRA1, OPRM1, HTR2A, MSH2, LINGO2, BICRAL, ADAM12, EMILIN2, HMGA2, DOCK5, TJP1, DISC1, BMP2, MSR1, RELN, HMGB1, FGF9, NFATC2, SLC23A2, DOCK1, PLS1, NIN, SMARCA2, ETS1, GLI3, SMARCC1, SMOC2, PCP4, LAMC1, BBS4, CFTR, NELL1, KITLG, DAB1, PRKN, TBX20, DPF3, PRKCH, IL6R, TOX, ITS2, LYN, OVOL2, NTN1, ZFH3, ARID1B, INSR, DDHD1, SNAI2, NSD2, JCAD, RASGRP1, BMP5, CSF1, GHRH, ASB4, SMAD5, TNN, MED1, IL33, ROR2, KL, IL10, ACTR2, CLSTN2, PTH, VSTM2A, MAP6, ZBTB7C, YBX3, NRXN1, PCID2, HIPK1, TWIST1, AKT3, JAK2, RBM19, UFL1, PRKCB, NEDD9, OLFM4, ATP2B1, GRIP1, STAT1, BRMS1L, IMPACT, CCBE1, MYOCD, MEF2C, ADGRB1, RXRA, WNT7A, MAP3K5, FOXO6, FBXW8, SDCBP, EPHA4, NTRK2, IL1RAPL1, NUMB, ADAMTS9, WNT2B, CD101, FBXO31, CDH5, NFKBID, LAMB1, CYFIP1, SEMA4D, RUNX1, WNT5B, PDCL3, TNFSF11, ADGRL2, HDAC2, MAPK9, APELA, TET1, EPHB1, GRM5, NRP1, PRKCA, FAIM, CHODL, POR, RAG1, BMPER, CUX1, MACROH2A1, EPHB2, FLRT2, MYB, KALRN, LAMA1, TIAM2, BMP7, DLG5, NUDT21, SLIT2, ERBB4, SYNDIG1, ROBO1, NLGN1, SHLD2, SLC6A3, ASIC2, EFNA5, TCF12, LOXL2, DMRT1, STK3, HNRNP, IGF1R, GLI2, DNMI1</p>                                                                                                                                                                                                                                                                                                                                                                                                                                                                                                                                                                                                                                                                                                                                                                                                                                                                                                                                                                                                                                                                                                                                                                                                                                                                                                                                                                                                                                                                                                                                                                                   |
| GO:0048519 | negative regulation of biological process | 0.000005680694652414687 | <p>NOTCH2, BRINP3, MTOR, CNTN4, SPOCK1, WWC1, PTPRD, SLC24A2, PVT1, ULK2, NLK, FTO, PLCB1, ZNF536, TAF15, SVIL, ZFPM2, L3MBTL4, DLC1, TNRC6B, ITPR2, RIPOR2, PDE4D, RDX, STXB1, BCL2, KCNMA1, PRDM16, ALDH1A2, FBN1, CHRNA7, ROBO2, ZEB1, AKR1C3, RARB, SPRED1, USH2A, MINAR1, ALK, FOXJ2, CDYL2, CARMIL1, MCTP1, BABAM2, GLIS3, FANK1, ERBIN, RHPN2, MLLT3, SUS4, MAP4, SPON1, APC, TSHZ3, DSCAM, RTN1, CRKL, ILDR2, ARHGAP24, PTPRJ, KDM4C, EGFR, RFX3, USP14, ANGPT1, CDK12, BACH1, PRKACB, RGS3, NCOR1, NEDD4, SND1, SCAI, BCL11A, SOX6, TMEM182, GRK3, CHSY1, NTRK3, C5, ZFAND6, DKK2, FLT1, THRAP3, MAPKB1, AOA, DGKI, INVS, GRIA1, CRACD, CAST, TTC39B, SLC8A3, MALRD1, TOM1L2, PRKD1, TPTE2, PAK1, EPHA7, NCOA7, SPEN, RAPGEF2, LRP2, ADGRB3, RUNX2, TAOK3, ONECUT1, CPEB4, TMEM38B, SLC24A3, LDB2, CCL28, SMYD3, GRM7, RETREG1, RPTOR, GHR, THADA, COL4A2, TBCD, NEDD4L, ADAM10, HDAC9, ZHX3, ATF7IP, APBB2, APP, RPS6KA2, SAMS1, CACNA1C, KDM1B, DCLK1, STAU2, DOCK8, USP18, SEMA5A, VCL, ARHGAP44, NTF3, ACER2, PARP15, NDUFAF2, CD2AP, AURKA, PARN, CFDP1, ST18, SLC8A1, PTPRR, SRGAP2C, FIG4, DUX4, ABCG8, SERPINA6, SRGAP2B, KANK1, KCNE4, MAP4K4, ABCD2, BMPR1B, FMN2, AKAP6, HOMER2, CTNNA2, DIP2B, LARP1, ITPKB, TRPC5, RGS20, PDE10A, RAP1GDS1, RNLS, KICS2, DN3, NBN, IFT57, INTS7, PRKCZ, GRB10, RYR3, TAF15, DIP2A, MSH6, MCPH1, RGS9, HECW1, ABCA5, PHF19, DUSP22, YAP1, BRINP1, MAPK1, MGA, T5, ITIH5, ADAM22, USP25, PLG, ZNRF3, NRG3, UBE2O, SFMBT2, MIR663AHG, NIPBL, GABPA, FAT3, CORO2B, CARD18, STK38, PTPN13, SORCS3, LIMCH1, PAFAH1B1, EFEMP1, ZNF684, TM7SF3, DCAF1, ITGB8, TPM1, NF2, HIVEP1, CTNNA1, BIRC6, KLF15, PPARA, MEIS2, NFIB, PRTG, PTPRK, PAK5, TRERF1, PLA2R1, SEMA3C, DAPK1, NAV3, SLC24A4, SEC14L1, VPS13C, AGO2, PHC3, ALPK2, JARID2, DNAJC15, GATAD2B, DYSF, ANK2, ADGRV1, ZNF846, BCAS3, RYR2, BBS2, WNT9B, RANBP3L, SEMA6D, DUSP16, SMARCA4, FABP7, PARD3, MAPKAP1, TNRC6C, PIAS1, BLK, TNR, CXADR, DOCK4, ATRX, PTPRT, ELAVL4, ABL1, MXI1, PTPN12, HDAC4, OXR1, SLC1A1, PRKAA1, LRFN5, CREG1, DROSHA, L3MBTL3, NBAS, PSMF1, SLFN11, RAP1A, GLIS1, MORC1, TOX3, BAZ2A, INPP5A, FGF10, ZC3HAV1, GRID2, LATS2, NRG1, ASPM, ZNF438, ABCB7, ZBTB16, KIR3DL2, ZNF675, SH3GL3, SETDB2, PRKCE, FOXK2, NXN, WNK2, FBN2, CD44, RGS12, PTPRO, EGF, TRIO, PDE3A, STXB6, LNPEP, LIMD1, PEX14, SPRED2, RPS6KA3, ATP8A2, PTPN2, TRIM5, PLXNA2, RFC1, HTR2C, CLEC16A, ARHGEF7, CD96, AMBRA1, LTBP1, OPRM1, HTR2A, DAZL, KREMEN1, SEMA3E, TAF3, TMEM67, FHL2, ABHD17C, PUM1, TMOD2, HERC1, MSH2, IGF2BP3, ANKRD17, ZNF397, LUC7L, HIPK3, CDKN2C, EPN2, GRK3, CLSPN, NOS2, BICRAL, MOSMO, MNAT1, RBBP8, MDFIC, ANK3, EMILIN2, HMGA2, CCND3, BCL11B, DOCK5, CREM, LYPLA1, MBP, LINC01151, TRPS1, TGFA, CRIM1, PRR5L, MYT1L, TJP1, LDLRAD4, NPHP4, PACSIN2, HLA-</p> |

|       |            |         |                                                                                                                                                                                                                                                                                                                                                                                                                                                                                                                                                                                                                                                                                                                                                                                                                                                                                                                                                                                                                                                                                                                                                                                                                                                                                                                                                                                                                                                                                                                                                                                                                                                                                                                                                                                                                                                                                                                                                                                                                                                                                                                                                                                                                                                                                                                                                                                                                                                                                                                                                                                                                                                                                                                                                                                                                                                                                                                                                                                                                                                                                                                                                                                                                                                                                                                                                                                                                                                                                                                                                                                                                                                                                                                                                                                                                                                                                |
|-------|------------|---------|--------------------------------------------------------------------------------------------------------------------------------------------------------------------------------------------------------------------------------------------------------------------------------------------------------------------------------------------------------------------------------------------------------------------------------------------------------------------------------------------------------------------------------------------------------------------------------------------------------------------------------------------------------------------------------------------------------------------------------------------------------------------------------------------------------------------------------------------------------------------------------------------------------------------------------------------------------------------------------------------------------------------------------------------------------------------------------------------------------------------------------------------------------------------------------------------------------------------------------------------------------------------------------------------------------------------------------------------------------------------------------------------------------------------------------------------------------------------------------------------------------------------------------------------------------------------------------------------------------------------------------------------------------------------------------------------------------------------------------------------------------------------------------------------------------------------------------------------------------------------------------------------------------------------------------------------------------------------------------------------------------------------------------------------------------------------------------------------------------------------------------------------------------------------------------------------------------------------------------------------------------------------------------------------------------------------------------------------------------------------------------------------------------------------------------------------------------------------------------------------------------------------------------------------------------------------------------------------------------------------------------------------------------------------------------------------------------------------------------------------------------------------------------------------------------------------------------------------------------------------------------------------------------------------------------------------------------------------------------------------------------------------------------------------------------------------------------------------------------------------------------------------------------------------------------------------------------------------------------------------------------------------------------------------------------------------------------------------------------------------------------------------------------------------------------------------------------------------------------------------------------------------------------------------------------------------------------------------------------------------------------------------------------------------------------------------------------------------------------------------------------------------------------------------------------------------------------------------------------------------------------|
|       |            |         | <p> <i>B, SNX3, NAA35, BRCA2, ZBTB2, BLM, SEMA3A, STRN, BMP2, RC3H2, ATP9A, PSG9, SOGA1, MSR1, ZC3H14, GFI1B, TBC1D4, RANBP9, RESF1, RIN3, TMEM161A, SEMA3D, ASXL3, LEMD3, ARHGAP42, HMGB1, GNAQ, FGF9, NFATC2, SH3BP5, CPAMD8, MDM1, SLC23A2, ANKRD26, TTC21B, ETS2, ZNF875, DSTYK, UIMC1, LRRFIP1, RAP1GAP, SRGAP2, DRAXIN, SLAMF1, SMARCA2, ETS1, GLI3, CGAS, SMARCC1, SNX6, CNKSR3, GRIK2, MYEF2, ZNF431, RERE, MAP2, BTA1, ATF2, HIRA, CYLD, BBS4, MAPK8IP1, MX1, COL5A1, NELL1, UBASH3A, NEU3, MRPL13, KITLG, UBR1, DCC, SLC30A10, RCAN1, GTF2I, RORB, DAB1, SELENON, RB1CC1, PTPRE, PRKN, MTMR2, ZNF608, TBX20, DACH1, ZNF541, DPF3, NGEF, GRIN2A, ARID5B, JPH1, ATXN1, PRKCH, PKP1, FRMD4A, IL6R, NLRC5, TFDP1, CNOT6L, KANK4, SNX25, PTPRB, ZFP90, COPS8, ZNF124, SHANK2, USP7, PSMA1, ENPP3, PLAGL1, SOX30, KIR2DL4, NPAS2, ROCK1, LYN, ARHGAP28, CTSB, TTC37, ZNF169, DTX1, TENM2, OVOL2, PIWIL3, ZBTB33, NTN1, ZFH3, DPYSL5, BANP, RNF152, OTUD7A, BMF, YTHDF3, TFF1, DEDD2, HECTD1, ARFGEF1, SNAI2, ASH1L, BID, SIAH2, TRABD2B, UFD1, SP3, ERN2, TIAL1, ELF2, NSD2, CD9, CARD10, TWIST2, CTIF, SAMHD1, ENPP1, TP53I11, TMEM225, NDRG2, CSNK2A1, BMP5, CSF1, HDGF13, BCL2L1, SERPINB9, SCAF4, MIR3142HG, CTDP1, HCN1, PRKG1, GRIN2B, GRB14, FANCB, CNMD, DHRS3, SMAD5, CELF4, TCERG1, ABCG1, FOXN3, SLC40A1, PRAME, TNN, MED1, CDC14B, IL33, AJAP1, BANK1, CSDE1, LMX1A, TMEM178A, IL10, SFPQ, SCML2, PRAMEF25, PTH, SOSTDC1, PRKAA2, NDC80, PACRG, ABHD2, ITPRIP, ETV6, IQGAP1, CAMLG, ZBTB7C, MORC2, SREBF2, ANP32B, YBX3, AIMP1, NRXN1, PCID2, FRY, PBLD, FICD, PEG10, TWIST1, AKT3, JAK2, FSTL1, ZBTB38, PATL1, CREBBP, MELTF, TNKS, PCNA, SIAH3, UFL1, ADAMTS5, NFKBIA, PRKCB, ABCC8, ANXA4, RTRAF, BRD4, ZBTB21, SERBP1, NEDD9, ITGA6, ATP2B1, ASS1, BTG3, ERLIN2, OTOF1, CIDEA, ZBTB49, KRT6A, AGO1, MEOX2, SLC6A1, STAT1, BRMS1L, NDFIP2, NR2C1, MAP2K6, DGKG, MTPN, ABI1, CEMIP, PRAMEF2, IMPACT, PARK7, ADAMTS18, MAPK8, OAZ2, POU1F1, ADCYAP1R1, MTF2, NCAPG2, FOXF2, MYOCD, HNRNPM, MEF2C, ADGRB1, RXRA, WNT7A, RBPM2, NDFIP1, SERPINI2, PRDM13, ERI1, C16ORF72, MAGEL2, PDE2A, SDCBP, WWOX, ZBTB25, PASK, MLLT1, NCK1, SCAF8, FGR, CDCA8, PPP2R3A, RNF8, EPHA4, GABRA5, MECOM, DNMT3L, NTRK2, IL1RAPL1, NUMB, LHX9, ADAMTS9, ZBTB10, OCLN, MIR548H4, SHISA6, IL17RD, FBXO31, IREB2, PTK2, CDH5, ANKRD6, ARHGAP12, CLDN18, ASCL3, DIAPH1, FEZ2, INIP, MIR17HG, APIP, CYFIP1, UBE3A, SEMA4D, JAM2, SERPINB10, ZBTB20, RUNX1, AKR1B1, KIRREL1, AMFR, NENF, PTGFR, ASAP1, SAMD13, TPTE, PDCL3, SCRP9, GPR55, NSUN2, CDC45, BICD1, TNFSF11, FYN, BUB1, KDM5A, PCBP3, ZNF705G, PPM1F, SDE2, RBMS3, HDAC2, AVEN, GON4L, TBX15, PSME3IP1, COL18A1, ALB, ZFYVE28, PABPC1, CRTAM, APELA, TET1, HECW2, CDH2, RAD9A, XRN2, PHLPP1, GPR137B, EPHB1, GRM5, ADCK1, SPOPL, ZNF705D, RPS6KA5, SPTB, TBC1D1, PTPRG, PID1, NRP1, MIDEAS, PRKCA, FAIM, FHIT, ITGA1, KLF12, RC3H1, NRIP1, POR, MCC, BCR, TUT4, RGS6, RERG, FBLN1, RAG1, BMPER, PRDM15, CUX1, SRGAP3, MACROH2A1, MITF, EPHB2, SACS, CD38, EYA4, AKAIN1, MET, ZNF705B, CDH13, SERPINB2, ATG5, MAGI2, PRDM11, UNK, MLIP, MYB, KALRN, GNAS, MFHAS1, SERPINB7, BMP7, ASTN2, DLG5, TNFAIP8, ZMYND8, KCTD1, BPTF, BTBD10, ZMYND11, TMEM25, DDX6, ADGRF5, WDR41, PPP1R13B, FOCAD, ABL2, MMP26, BACE2, PARBP, EYA1, FHOD3, PRPF18, SLIT2, CNOT7, PLCL1, ERBB4, IL20RB, SERPINB11, ROBO1, SAMD4A, PBX1, NUF2, PRKCQ, ANTXR1, NDRG1, SORCS2, TRDN, MGMT, NLGN1, SHLD2, NOS1, SLC6A3, ASIC2, EFNA5, GAS2L1, NSD1, EHMT1, SLIT3, FRMD5, ESR1, KDM4B, LOXL2, IQCJ-SCHIP1, SKAP2, PRLR, AGO3, HTT, FOXB1, CAMK1D, PIK3R3, HLA-F, FER, EYA2, CCR2, STARD13, A2M, CHFR, EPS8, JAZF1, ZNF891, SPOCK3, SEMA4B, PHC2, GRIA4, ROCK2, PRDM1, RORA, DMRT1, RGS8, HSPG2, HERPUD1, COL4A3, WASHC1, RGS7, HOOK3, KIF7, FSTL4, BARD1, STK3, DEPTOR, ZNF423, ZNF568, HNRNPU, APCDD1, IGF1R, KCNAB1, PRKAG2, GLI2, THRB, MORC3</i> </p> |
| GO:00 | regulation | 0.00000 | <p> <i>NOTCH2, BCAR3, WWC1, KSR1, PLCB1, CHRNA7, SPRED1, ALK, PJA2, CRKL, TNIK, PTPRJ, EGFR, ANGPT1, NCOR1, NTRK3, FLT1, MAPKB</i> </p>                                                                                                                                                                                                                                                                                                                                                                                                                                                                                                                                                                                                                                                                                                                                                                                                                                                                                                                                                                                                                                                                                                                                                                                                                                                                                                                                                                                                                                                                                                                                                                                                                                                                                                                                                                                                                                                                                                                                                                                                                                                                                                                                                                                                                                                                                                                                                                                                                                                                                                                                                                                                                                                                                                                                                                                                                                                                                                                                                                                                                                                                                                                                                                                                                                                                                                                                                                                                                                                                                                                                                                                                                                                                                                                                        |



|            |                                          |                                     |                                                                                                                                                                                                                                                                                                                                                                                                                                                                                                                                                                                                                                                                                                                                                                                                                                                                                                                                                                                                                                                                                                                                                                                                                                                                                                                                                                                                                                                                                                                                                                                                                                                                                                                                                                                                                                                            |
|------------|------------------------------------------|-------------------------------------|------------------------------------------------------------------------------------------------------------------------------------------------------------------------------------------------------------------------------------------------------------------------------------------------------------------------------------------------------------------------------------------------------------------------------------------------------------------------------------------------------------------------------------------------------------------------------------------------------------------------------------------------------------------------------------------------------------------------------------------------------------------------------------------------------------------------------------------------------------------------------------------------------------------------------------------------------------------------------------------------------------------------------------------------------------------------------------------------------------------------------------------------------------------------------------------------------------------------------------------------------------------------------------------------------------------------------------------------------------------------------------------------------------------------------------------------------------------------------------------------------------------------------------------------------------------------------------------------------------------------------------------------------------------------------------------------------------------------------------------------------------------------------------------------------------------------------------------------------------|
| 43408      | of MAPK cascade                          | 6164994<br>1254514<br>6             | P1,EDAR,PAK1,EPHA7,RAPGEF2,PELI2,TAOK3,GHR,APP,NTF3,PTPRR,MAP4K4,PAK3,RAP1GDS1,PRKCZ,DUSP22,MAPK1,PDGFD,STK38,HRH4,PAFAH1B1,NF2,GRM1,PAK5,IL34,DUSP16,ABL1,RAP1A,FGF10,NRG1,DENND2B,ZNF675,PRKCE,WNK2,CD44,EGF,SPRED2,PTPN2,TRIM5,HTR2C,OPRM1,HTR2A,RELL1,HIPK3,MDFIC,PLCE1,TGFA,NRK,SEMA3A,MAGI3,BMP2,RANBP9,HMGB1,TRAF3,DSTYK,SLAMF1,CNKSR3,GAREM1,NEK10,CYLD,MAPK8,IP1,KITLG,SLC30A10,RB1CC1,PRKN,IL6R,ROCK1,LYN,CRACR2A,INSR,ASH1L,ERN2,ZDHHC17,JCAD,RASGRP1,NDRG2,ROR2,KL,BANK1,IQGAP1,NRXN1,ALKAL2,JAK2,MADD,HCRTF1,MAP2K6,MEF2C,WNT7A,MAP3K5,MAP3K4,SDCBP,EPHA4,MECOM,NTRK2,ANKRD6,APIP,NENF,GPR55,TNFSF11,DOK5,APELA,CDH2,PHLPP1,EPHB1,GRM5,NRP1,PRKCA,ITGA1,FBLN1,BMPER,PRDM15,EPHB2,PRDM11,MFHAS1,BMP7,ZMYND11,PDGFC,ERBB4,ROBO1,ROCK2,STK3,IGF1R,AKAP13                                                                                                                                                                                                                                                                                                                                                                                                                                                                                                                                                                                                                                                                                                                                                                                                                                                                                                                                                                                                                                                                                         |
| GO:0030031 | cell projection assembly                 | 0.00000<br>6280679<br>7749516<br>43 | MTOR,LRRRC49,RIPOR2,RDX,RP1,RALA,ODAD2,SDCCAG8,FGD4,SPAG16,CDC42EP3,AUTS2,CARMIL1,PARVB,ANO6,MAP4,APC,PLPPR5,ARHGAP24,TNIK,RFX3,ARMC2,RAPGEF2,ONECUT1,LRGUK,SEPTIN9,DCLK1,STAU2,VCL,ARHGAP44,CD2AP,SRGAP2C,KANK1,DNM3,IFT57,COBL,YAP1,ABLM1,BCAS3,SYNE2,BBS2,AIF1L,ABL1,HDAC4,DNAH5,MYO10,CEP83,PTPRO,IFT43,ARHGEF7,ABCC4,TMEM67,PLCE1,DISC1,WDPCP,DNAL1,NUDCD3,TTC21B,RAP1GAP,SRGAP2,DNAH8,DAW1,CYLD,BBS4,KIAA0753,PCDH15,VAV3,CFAP74,ROCK1,TENM2,NTN1,IFT81,FAM149B1,CD14B,PCNT,ACTR2,TTC39C,NRXN1,CIBAR1,ANLN,CELSR2,GORAB,GAP43,BBS9,CEP120,WASF3,SDCBP,NCK1,DRC7,SNAP29,EMP1,RSPH1,OCLN,MARK4,CYFIP1,HOATZ,SAXO1,ASAP1,CCDC88A,ADAMTS16,SPAG6,ARL13B,HYDIN,RP1L1,NRP1,IFT46,CFAP70,STK36,B9D1,EPHB2,TOGARAM1,CDH13,ATG5,DNAH17,RFX2,SLIT2,NLGN1,HTT,CFAP44,FER,RPGRIPI1,EPS8,ATAT1,WASHC1,ZNF423,SEPTIN6                                                                                                                                                                                                                                                                                                                                                                                                                                                                                                                                                                                                                                                                                                                                                                                                                                                                                                                                                                                                                                              |
| GO:0031323 | regulation of cellular metabolic process | 0.00000<br>6587506<br>6588402<br>93 | NOTCH2,BCAR3,MTOR,NSG1,WWC1,TRAPPC9,BNC2,ULK2,NLK,LONP2,FTO,KSR1,MGA,RFX7,ZNF236,PLCB1,ZNF536,ZFPM2,L3MBTL4,DLC1,TNRC6B,PDE4D,ERC1,BCL2,PRDM16,CHRNA7,PIK3C3,EPC2,SPIRE1,ZEB1,AKR1C3,RARB,SPRED1,ALK,AUTS2,FOXJ2,CDYL2,BABAM2,GLIS3,FANK1,ERBIN,ZNF880,MLLT3,SPON1,APC,ZNF595,TSHZ3,RBFOX3,DSCAM,RTN1,TCF4,CRKL,ILDR2,SOX5,SETD2,ERG,ZNF573,TNIK,PTPRJ,KDM4C,NEK4,TSHZ2,EGFR,ZNF280B,RFX3,USP14,ANGPT1,CDK12,BACH1,NEK7,NCOR1,RNF220,ZNF407,NEDD4,MAML2,MTRF1,SND1,SCAI,NSMCE2,BCL11A,SOX6,FLI1,RPRD1A,NTRK3,FLT1,ZNF648,RFC3,ZNF382,TASP1,THRAP3,SLC8A3,MALRD1,PRKD1,PAK1,EPHA7,NCOA7,KHDRBS2,SPEN,RAPGEF2,PELI2,RUNX2,TAOK3,ONECUT1,CPEB4,UBE2L3,LDB2,PUM3,SMYD3,RPTOR,GHR,SSBP3,CELF2,HDAC9,ZHX3,ATF7IP,APBB2,APP,SAMSN1,KDM1B,ZNF600,NTF3,ACER2,PARP15,ZNF723,AURKA,PARN,ST18,PYGO1,SLC8A1,SSBP2,ANKRD31,DUX4,HIVEP2,ABCD2,BMPR1B,FMN2,ZNF717,ARNT,PAK3,ZNF257,RANBP2,LARP1,ITPKB,TRPC5,NBN,SCP2,INTS7,PRKCZ,GRB10,TAF15,MSH6,MCPH1,MBNL2,PHF19,MRFTA,TAF4B,DUSP22,EBF2,YAP1,NF1A,WDR70,RIPK4,ZKSCAN5,MAPK1,MGAT5,KMT2E,PCGF5,PDGFD,NRG3,SFMBT2,GFRA1,NIPBL,SPIDR,EWSR1,GABPA,ZNF735,CHD6,STK38,PTPN13,KANSL1,LIMCH1,MBNL1,ATF6,EFEMP1,ZNF684,DCAF1,VPS13D,CCNG2,NF2,RBFOX1,HIVEP1,MOB3B,AKAP9,KLF15,PPARA,MEIS2,SNX30,NFIB,MRTFB,PPP6R3,NR5A2,FOXJ3,PTPRK,TRERF1,EIF3D,DAPK1,VPS13C,AGO2,PHC3,JARID2,DNAJC15,GATAD2B,IL34,BRWD1,ZNF846,BCAS3,WNT9B,ZNF606,DUSP16,SMARCA4,PARD3,MAPKAP1,TNRC6C,PIAS1,EBF1,ATRX,NUAK1,PTPRT,ELAVL4,ABL1,MXI1,HDAC4,SLC1A1,PRKAA1,ITGB3BP,MRPS27,CREG1,DROSHA,L3MBTL3,APLF,NFAT5,NBAS,SLFN11,RAP1A,GLIS1,MORC1,TOX3,CAMK4,BAZ2A,FGF10,ZC3HAV1,LATS2,NRG1,INO80D,AP3B1,ZNF438,ABCB7,ZBTB16,MUSK,ZNF675,SMARCAD1,SETDB2,PRKCE,FOXK2,SLC03A1,MED15,ESRRG,ZNF718,USP33,CD44,PTPRO,EGF,PRRC1,PDE3A,LIMD1,PEX14,SPRED2,RPS6KA3,MTMR3,PTPN2,TRIM5,RFC1,HTR2C,CLEC16A,ALG10B,AMBRA1,KDM7A,OPRM1,HTR2A,FANCA,DAZL,GTFF2F2,TAF3,RP |

|  |  |  |                                                                                                                                                                                                                                                                                                                                                                                                                                                                                                                                                                                                                                                                                                                                                                                                                                                                                                                                                                                                                                                                                                                                                                                                                                                                                                                                                                                                                                                                                                                                                                                                                                                                                                                                                                                                                                                                                                                                                                                                                                                                                                                                                                                                                                                                                                                                                                                                                                                                                                                                                                                                                                                                                                                                                                                                                                                                                                                                                                                                                                                                                                                                                                                                                                                                                                                                                                                                                                                                                                                                                                                                                                                                                                                                                                                                                                                                                                                                                                                                                                                                                |
|--|--|--|--------------------------------------------------------------------------------------------------------------------------------------------------------------------------------------------------------------------------------------------------------------------------------------------------------------------------------------------------------------------------------------------------------------------------------------------------------------------------------------------------------------------------------------------------------------------------------------------------------------------------------------------------------------------------------------------------------------------------------------------------------------------------------------------------------------------------------------------------------------------------------------------------------------------------------------------------------------------------------------------------------------------------------------------------------------------------------------------------------------------------------------------------------------------------------------------------------------------------------------------------------------------------------------------------------------------------------------------------------------------------------------------------------------------------------------------------------------------------------------------------------------------------------------------------------------------------------------------------------------------------------------------------------------------------------------------------------------------------------------------------------------------------------------------------------------------------------------------------------------------------------------------------------------------------------------------------------------------------------------------------------------------------------------------------------------------------------------------------------------------------------------------------------------------------------------------------------------------------------------------------------------------------------------------------------------------------------------------------------------------------------------------------------------------------------------------------------------------------------------------------------------------------------------------------------------------------------------------------------------------------------------------------------------------------------------------------------------------------------------------------------------------------------------------------------------------------------------------------------------------------------------------------------------------------------------------------------------------------------------------------------------------------------------------------------------------------------------------------------------------------------------------------------------------------------------------------------------------------------------------------------------------------------------------------------------------------------------------------------------------------------------------------------------------------------------------------------------------------------------------------------------------------------------------------------------------------------------------------------------------------------------------------------------------------------------------------------------------------------------------------------------------------------------------------------------------------------------------------------------------------------------------------------------------------------------------------------------------------------------------------------------------------------------------------------------------------------|
|  |  |  | <p> RD1B, MARK2, EBF3, ZNF33B, FHL2, PUM1, HERC1, MSH2, IGF2BP3, EPHA6, ANKRD17, ZNF397, SLC2A13, HIPK3, CDKN2C, KNDC1, CLSPN, NOS2, BICRAL, MNAT1, RBBP8, MDFIC, HMGA2, CCND3, BCL11B, ECE1, ZIM3, CREM, TRPS1, PLCE1, TGFA, PRR5L, ATP6V1E1, UT P4, MYT1L, ZNF160, LDLRAD4, CNTN1, HSF5, ZNF367, BRCA2, DISC1, ZBTB2, BLM, INTS8, LIN54, ZNF121, BMP2, RC3H2, TRAK1, SOGA1, PTC2, ZC3H14, GFI1B, TMEM161A, ASXL3, RELN, HMGB1, GNAQ, FGF9, NFATC2, SH3BP5, ZNF567, TRAF3, ZNF462, ESRP1, TTC21B, ETS2, GEMIN5, ZNF875, DSTYK, UIMC1, LRRFIP1, IKZF2, ATF1, SMARCA2, ETS1, GLI3, CGAS, SMARCC1, SNX6, AFF3, SMOC2, CNKSR3, VENTX, IDE, PRDM10, MYEF2, ZNF431, RERE, BTAFA1, ZNF618, NEK10, MOB1B, ATF2, HIRA, CYLD, MAPK8IP1, HIVEP3, PSIP1, KPNA1, ME2, RGM, MRPL13, KITLG, CAMTA1, MYT1, CHRM5, YLPM1, SLC30A10, RCAN1, GTF2I, RORB, TADA2A, DAB1, MED27, ZNF208, RB1CC1, NMD3, PRKN, MTMR2, ZNF608, TBX20, SP110, MAPK10, DACH1, ZNF541, DPF3, ARID5B, ATXN1, PRKCH, PKP1, IL6R, ALS2, NLRC5, ZNF627, ACO1, TFDP1, CNOT6L, MKNK1, SNX25, FBLN5, TOX, SLC4A4, PTPRB, ZFP90, COPS8, ZNF124, USP7, VAV3, PLAGL1, SOX30, KIR2DL4, RALB, NPAS2, ROCK1, LYN, ZNF780B, ZNF169, DTX1, BZW1, TENM2, OVOL2, PIWIL3, ZBTB33, ZFXH3, ZNF44, RRGD, BANP, SUPT16H, ARID1B, HOXC13, RNF152, BAZ1A, CASZ1, INSR, BMF, YTHDF3, DEDD2, NEK6, HECTD1, PBX3, SUMO2, ZNF292, POGK, SNAI2, ASH1L, HOXC4, SIAH2, RXRG, SP3, DRAM1, ERN2, ZNF879, MBTPS2, TIAL1, ELF2, NSD2, FYCO1, SH3GLB1, CARD10, TWIST2, CTIF, ENPP1, RASGRP1, SNX9, TMEM225, CSNK2A1, BMP5, CSF1, HDGFL3, BCL2L1, SCAF4, CTDP1, INO80, FANCB, CLNS1A, SMD5, CELF4, TCERG1, ABCG1, FOXN3, SLC40A1, PRAME, MYCL, PSAP, LPGAT1, MED1, IL33, GPRC5C, ROR2, ZNF521, BANK1, CSDE1, LMX1A, IL10, ACTR2, SFPQ, SCML2, PRAMEF25, RIOK1, PTH, PRKAA2, SOHLH1, LARP6, PHF20L1, ETV6, IQGAP1, CAMLG, COX7A2L, ZBTB7C, TEAD1, SREBF2, YBX3, NRXN1, PCID2, ZNF234, CISD1, ZNF518A, CENPE, LMX1B, NGDN, ELOC, TWIST1, AKT3, ALKAL2, JAK2, VSX1, ZBTB38, ISX, MADD, PATL1, ZNF287, CELSR2, ZNF449, CREBBP, TNKS, PCNA, UFL1, NFKBIA, PRKCB, ANXA4, RFC2, ZNF354C, ALX4, RTRAF, BRD4, ZBTB21, SERBP1, NEDD9, ITGA6, ASS1, MTCL1, PPP1R17, ZNF528, ERLIN2, ZNF611, CIDEA, ZBTB49, EXOC1, STOX2, AGO1, MEOX2, ELL2, STAT1, BRMS1L, NR2C1, MAP2K6, GATAD1, MTPN, ABI1, CEMIP, PRAMEF2, POU6F2, IMPACT, PARK7, MAPK8, MED12L, ZSCAN30, POU1F1, ADCYAP1R1, MTF2, NCAPG2, FOXF2, MYOCD, ZSCAN5C, HNRNPM, ASCC2, ARID3B, MEF2C, ZNF613, ADGRB1, RXRA, WNT7A, MAP3K5, NDFIP1, MAP3K4, PRDM13, FOXO6, ZNF112, ATP6V1C2, MAGEL2, RAD51AP1, PDE2A, RAB38, DBF4B, FBXW8, SDCBP, NSMCE1, ZNF813, WWOX, ZBTB25, PASK, MLLT1, NCK1, SCAF8, FGR, CWC22, CDCA8, ATP6V1B2, MLLT10, IFNAR1, RNF8, EPHA4, INTS13, MECOM, DNMT3L, NTRK2, LHX9, ZBTB10, OCLN, CREB5, IREB2, PTK2, CDH5, ASCL3, FEZ2, CYFIP1, UBE3A, SEMA4D, ZBTB20, ZNF66, RUNX1, KIRREL1, POMT2, ZNF845, SAMD13, NOS1AP, PDCL3, SRP9, CCDC88A, NSUN2, CHCHD2, TNFSF11, FYN, KDM5A, PCBP3, ZNF705G, PPM1F, HDAC2, SLF1, GON4L, TBX15, SH2D3C, DOCK3, TRNAU1AP, NCS1, ZFYVE28, MAPK9, PABPC1, SLC39A8, ROR1, TET1, ARNT2, ITGA8, GPR137B, EPHB1, GRM5, ZNF705D, RPS6KA5, PID1, NRP1, MIDEAS, PRKCA, ATPSCMT, FHIT, ITGA1, ZNF615, KLF12, RC3H1, NRIP1, POR, ZNF850, ZNF235, ZNF738, SUPT3H, BCR, TUT4, ZNF215, TCERG1L, KIF16B, PRIM2, C14ORF39, TM9SF2, ELP2, FBLN1, STK36, ZNF678, BMPER, PRDM15, CUX1, ZNF420, MACROH2A1, MITF, EPHB2, CD38, EYA4, DPH6, CDK14, MET, SPPL3, ZNF705B, ATP6V0D2, CDH13, MED13L, ATG5, MAGI2, PRDM11, U NK, MLIP, MYB, ZNF704, MFHAS1, DHX29, BMP7, ZMYND8, RNF217, KCTD1, ZNF74, BPTF, BTBD10, ZMYND11, NUDT21, KMT2C, DDX6, ADGRF5, PDGFC, WDR41, ABL2, BACE2, RFX2, PARPBP, NECAB1, PKN OX2, EYA1, SLIT2, EXOC4, CNOT7, ESCO1, ERBB4, GSAP, ROBO1, SAMD4A, PBX1, NPAS3, PRKCQ, MGMT, ZNF679, SHLD2, NOS1, SLC6A3, PRR16, EFNA5, TCF12, ARHGEF11, RAB27A, NSD1, EHMT1, ESR1, KDM4B, LOXL2, PRLR, AGO3, HTT, FOXB1, CAMK1D, PIK3R3, FER, ZNF302, EYA2, INTS12, CHFR, ZNF721, JAZF1, ZNF578, ZNF891, NRF1, ZNF14, HRH1, PHC2, ROCK2, PRDM1, RORA, DMRT1, EIF4G3, </p> |
|--|--|--|--------------------------------------------------------------------------------------------------------------------------------------------------------------------------------------------------------------------------------------------------------------------------------------------------------------------------------------------------------------------------------------------------------------------------------------------------------------------------------------------------------------------------------------------------------------------------------------------------------------------------------------------------------------------------------------------------------------------------------------------------------------------------------------------------------------------------------------------------------------------------------------------------------------------------------------------------------------------------------------------------------------------------------------------------------------------------------------------------------------------------------------------------------------------------------------------------------------------------------------------------------------------------------------------------------------------------------------------------------------------------------------------------------------------------------------------------------------------------------------------------------------------------------------------------------------------------------------------------------------------------------------------------------------------------------------------------------------------------------------------------------------------------------------------------------------------------------------------------------------------------------------------------------------------------------------------------------------------------------------------------------------------------------------------------------------------------------------------------------------------------------------------------------------------------------------------------------------------------------------------------------------------------------------------------------------------------------------------------------------------------------------------------------------------------------------------------------------------------------------------------------------------------------------------------------------------------------------------------------------------------------------------------------------------------------------------------------------------------------------------------------------------------------------------------------------------------------------------------------------------------------------------------------------------------------------------------------------------------------------------------------------------------------------------------------------------------------------------------------------------------------------------------------------------------------------------------------------------------------------------------------------------------------------------------------------------------------------------------------------------------------------------------------------------------------------------------------------------------------------------------------------------------------------------------------------------------------------------------------------------------------------------------------------------------------------------------------------------------------------------------------------------------------------------------------------------------------------------------------------------------------------------------------------------------------------------------------------------------------------------------------------------------------------------------------------------------------|

|            |                                          |                         |                                                                                                                                                                                                                                                                                                                                                                                                                                                                                                                                                                                                                                                                                                                                                                                                                                                                                                                                                                                                                                                                                                                                                                                                                                                                                                                                                                                                                                                                                                                                                                                                                                                                                                                                                                                                                                                                                                                                                                                                                                                                                                                                                                                                                                                                                                                                                                                                                                                               |
|------------|------------------------------------------|-------------------------|---------------------------------------------------------------------------------------------------------------------------------------------------------------------------------------------------------------------------------------------------------------------------------------------------------------------------------------------------------------------------------------------------------------------------------------------------------------------------------------------------------------------------------------------------------------------------------------------------------------------------------------------------------------------------------------------------------------------------------------------------------------------------------------------------------------------------------------------------------------------------------------------------------------------------------------------------------------------------------------------------------------------------------------------------------------------------------------------------------------------------------------------------------------------------------------------------------------------------------------------------------------------------------------------------------------------------------------------------------------------------------------------------------------------------------------------------------------------------------------------------------------------------------------------------------------------------------------------------------------------------------------------------------------------------------------------------------------------------------------------------------------------------------------------------------------------------------------------------------------------------------------------------------------------------------------------------------------------------------------------------------------------------------------------------------------------------------------------------------------------------------------------------------------------------------------------------------------------------------------------------------------------------------------------------------------------------------------------------------------------------------------------------------------------------------------------------------------|
|            |                                          |                         | PDK1,HERPUD1,NCOA6,WASHC1,ZFP30,BARD1,STK3,DEPTOR,ZNF423,ZNF568,HNRNPU,RAB3GAP2,IGF1R,PRKAG2,GLI2,THRB,AKAP13,MORC3,DNM1L                                                                                                                                                                                                                                                                                                                                                                                                                                                                                                                                                                                                                                                                                                                                                                                                                                                                                                                                                                                                                                                                                                                                                                                                                                                                                                                                                                                                                                                                                                                                                                                                                                                                                                                                                                                                                                                                                                                                                                                                                                                                                                                                                                                                                                                                                                                                     |
| GO:0003008 | system process                           | 0.000006996733231261712 | MTOR,SGCD,IMMP2L,SLC24A2,MYO9A,FTO,PLCB1,PIEZO2,TENM4,ZDHHC21,RIPOR2,PDE4D,RP1,BCL2,KCNMA1,CHRNA7,RIMS1,GABRB3,AKR1C3,NAV2,ENPEP,SPAG16,MYO1E,USH2A,RIMS2,PJA2,RHPN2,CACNG2,DLGAP1,CNTNAP2,MYO3B,TSHZ3,SLC4A10,PTPRJ,EGFR,ANGPT1,CTNNA3,PRKACB,MYOF,CRB1,BTBD9,FLI1,ATP2B2,TUSC3,GABRB1,DGKI,GRIA1,CRACD,SLC8A3,CHRM3,LRP2,ADGRB3,FGF12,GABRA6,CPS1,TMEM38B,SLC24A3,SLC44A1,TAFA4,GRM7,RETREG1,CELF2,NEDD4L,PPP1R12B,TRPM1,APBB2,APP,SLC7A2,RPS6KA2,CACNA1C,CACNB2,GABRG2,TMC1,NTF3,SLC8A1,FIG4,TAFA2,ABCG8,LOXHD1,KCNE4,AKAP6,HOMER2,CTNNA2,RAB8B,KCNK10,RAP1GDS1,RNLS,NBN,PRKCZ,CALD1,RGS9,YAP1,BRINP1,MAPK1,HRH2,SYT10,ABLIM1,NIPBL,SLC16A1,CORO2B,SORCS3,MYLK3,PAFAH1B1,ATF6,EFEMP1,TPM1,RBFOX1,CORIN,AKAP9,KLF15,PPARA,MEIS2,SYNJ1,GRM1,GABRG1,PAK5,SLC24A4,TMEM108,DNAH11,JARID2,SCN2A,ANK2,TANC1,ADGRV1,RYR2,BBS2,OR4F6,PARD3,TNR,GRM8,CXADR,DOCK4,ELAVL4,ABL1,HDAC4,SLC1A1,KCNH1,CAMK4,FGF10,GRID2,AP3B1,RASGRF1,MUSK,SLC03A1,SLMAP,PTPRO,ABCC9,P2RX6,PDE3A,EXT1,LNPEP,ATP8A2,LHFPL3,OR4F15,HTR2C,SLC2A3,ATP8A1,PKHD1L1,OPRM1,ABCC4,HTR2A,CYP4A11,CNNM4,STAC,TMOD2,HERC1,GNAL,SLC2A13,KCND2,NOS2,SGCZ,MYLK2,ANK3,EMILIN2,MYOM2,DOCK5,F5,ECE1,MBP,PLCE1,ANKFN1,FBXO32,TJP1,CACNA1I,PDLIM5,OR9Q1,SCN11A,NCAM2,PDE6C,RELN,ARHGAP42,MYOM1,UNC13B,PLS1,SLC9A4,GABRR2,GRIK2,DAW1,MYL1,NEK10,BBS4,LAMC3,DOP1B,CAMTA1,CHRM5,RCAN1,RORB,SELENON,MYO3A,PRKN,MTMR2,TBX20,DLGAP2,PCDH15,SMPX,GRIN2A,ATXN1,CDH23,OR51E1,AC01,SHISA9,SLC4A4,PDE6A,SCN10A,SHANK2,KCND3,ROCK1,LRIG1,SLC15A2,INSR,OR7A17,TFF1,NMU,PBX3,SNAI2,ABCA4,GABRG3,OR4K2,UTRN,IGSF11,CTDP1,HCN1,PRKG1,GRIN2B,DHRS3,SMAD5,CELF4,OR4C46,VSTM4,KDM6A,IL33,KL,OTOG,LMX1A,IL10,ACTR2,OR1L6,NRXN1,PBLD,SSPN,JAK2,VSX1,SVEP1,PTGS1,TRPV5,OR2T3,ABCC8,SMTN,USH1C,NEDD9,ATP2B1,BBS9,EXT2,SLC6A1,GRXCR1,STAT1,MAP2K6,MTPN,CEMIP,POU6F2,CCBE1,CSMD1,OR6C75,ASB2,MYOCD,HMCN1,MYH13,OR13C9,MEF2C,WNT7A,WASF3,S100B,FOXO6,OR10H2,PDE2A,PPIP5K2,GABRA5,NTRK2,TNNI1,OCN,SHISA6,AKAP11,IREB2,CDH5,DIAPH1,CYFIP1,UBE3A,JAM2,AKR1B1,KIRREL1,AMFR,OR4L1,NOS1AP,SORBS2,ADAMTS16,SLC5A1,OR11G2,FYN,SCN8A,HDAC2,SNB1,TMEM63C,COL18A1,APELA,TRPM3,ROR1,OPA3,ASB3,CNTN5,ITGA8,EPHB1,EYS,RP1L1,GRM5,PRKCA,ATPCKMT,ITGA1,BCR,NRXN3,RAG1,DGCR2,EPHB2,SGCG,CD38,EYA4,MYO5B,SPECC1,CACNG3,ATG5,MLIP,KALRN,SLC1A2,GNAS,GABRA2,OR2T2,TMEM25,ADGRF5,OR4N2,EYA1,SLIT2,TMPRSS3,TRHDE,TRDN,NLGN1,NOS1,SLC6A3,ASIC2,ARHGEF11,DTNA,DNAH9,CACNA2D1,HTT,FOXB1,KATNIP,CCR2,RPGRIP1,HRH1,ROCK2,PTPRQ,COL4A3,CLCN5,VTI1A,THRB,AKAP13,DNM1L |
| GO:0031589 | cell-substrate adhesion                  | 0.000007140672253730093 | SPOCK1,FREM1,DLC1,PTPRA,BCL2,USH2A,CARMIL1,RIN2,PARVB,CRKL,PTPRJ,ANGPT1,MACF1,ONECUT1,CCL28,TBCD,VCL,ACER2,KANK1,MAP4K4,PRKCZ,DUSP22,PLG,ITGBL1,CORO2B,LIMCH1,FMN1,ITGB8,NF2,TIAM1,PTPRK,BCAS3,ABL1,PEAK1,PRKCE,CD44,PTPRO,COL5A3,ATXN3,ARHGEF7,CD96,SEMA3E,DOCK5,EGFLAM,DISC1,WDPCP,DOCK1,SRGAP2,LAMC1,LAMC3,ITGA9,FBLN5,ROCK1,VCAM1,UTRN,CSF1,TNN,MICALL2,ATRN,AJAP1,JAK2,MELTF,NEDD9,OLFM4,ITGA6,ITGA4,ADAMTS9,TRPM7,PTK2,LAMB1,EDIL3,PPM1F,ITGA8,NTN4,EPHB1,NRP1,ITGA1,BCR,FBLN1,PPFIA2,CDH13,ATRNL1,ANTXR1,EFNA5,NTNG1,FER,ROCK2,RSU1                                                                                                                                                                                                                                                                                                                                                                                                                                                                                                                                                                                                                                                                                                                                                                                                                                                                                                                                                                                                                                                                                                                                                                                                                                                                                                                                                                                                                                                                                                                                                                                                                                                                                                                                                                                                                                                                                                                    |
| GO:0010976 | positive regulation of neuron projection | 0.000007346806458500755 | TENM3,ALK,NEGR1,PLPPR5,BCL11A,NTRK3,PRKD1,RAPGEF2,ARSB,STAU2,FIG4,PAK3,COBL,PAFAH1B1,ELAVL4,ABL1,RAP1A,ATP8A2,MARK2,FUT9,CNTN1,SNX3,DISC1,RELN,ATF1,TOX,LYN,BMP5,TNN,ROR2,ACTR2,NRXN1,ALKAL2,ITGA6,NCK1,NTRK2,CYFIP1,FYN,ROR1,NRP1,EPHB2,MAGI2,KALRN,BMP7,ABL2,                                                                                                                                                                                                                                                                                                                                                                                                                                                                                                                                                                                                                                                                                                                                                                                                                                                                                                                                                                                                                                                                                                                                                                                                                                                                                                                                                                                                                                                                                                                                                                                                                                                                                                                                                                                                                                                                                                                                                                                                                                                                                                                                                                                               |

|            |                                                   |                         |                                                                                                                                                                                                                                                                                                                                                                                                                                                                                                                                                                                                                                                                                                                                                                                                                                                                                                                                                                                                                                                                                                                                                                                                                                                                                                                                                                                                                                                                                                                                                                                                                                                                                                                                                                                                                                                                                                                                                                                                                                                                                                                                                                                                                                                                                                                                                                                                                                                                                                                                                                                                                                                                                                                                                                                                                                                                                                                                                                                                                                                                                    |
|------------|---------------------------------------------------|-------------------------|------------------------------------------------------------------------------------------------------------------------------------------------------------------------------------------------------------------------------------------------------------------------------------------------------------------------------------------------------------------------------------------------------------------------------------------------------------------------------------------------------------------------------------------------------------------------------------------------------------------------------------------------------------------------------------------------------------------------------------------------------------------------------------------------------------------------------------------------------------------------------------------------------------------------------------------------------------------------------------------------------------------------------------------------------------------------------------------------------------------------------------------------------------------------------------------------------------------------------------------------------------------------------------------------------------------------------------------------------------------------------------------------------------------------------------------------------------------------------------------------------------------------------------------------------------------------------------------------------------------------------------------------------------------------------------------------------------------------------------------------------------------------------------------------------------------------------------------------------------------------------------------------------------------------------------------------------------------------------------------------------------------------------------------------------------------------------------------------------------------------------------------------------------------------------------------------------------------------------------------------------------------------------------------------------------------------------------------------------------------------------------------------------------------------------------------------------------------------------------------------------------------------------------------------------------------------------------------------------------------------------------------------------------------------------------------------------------------------------------------------------------------------------------------------------------------------------------------------------------------------------------------------------------------------------------------------------------------------------------------------------------------------------------------------------------------------------------|
|            | development                                       |                         | NLGN1,CAMK1D,IGF1R                                                                                                                                                                                                                                                                                                                                                                                                                                                                                                                                                                                                                                                                                                                                                                                                                                                                                                                                                                                                                                                                                                                                                                                                                                                                                                                                                                                                                                                                                                                                                                                                                                                                                                                                                                                                                                                                                                                                                                                                                                                                                                                                                                                                                                                                                                                                                                                                                                                                                                                                                                                                                                                                                                                                                                                                                                                                                                                                                                                                                                                                 |
| GO:0035249 | synaptic transmission, glutamatergic              | 0.000007916535454463932 | UNC13C,STXBP1,CDH8,CACNG2,TSHZ3,GRIK3,DGKI,GRM7,SYT1,GRIK4,GRM1,TNR,GRM8,GRID2,EXT1,HTR2A,DISC1,RELN,UNC13B,GRIK2,PRKN,GRIN2A,ALS2,GRID1,HCN1,GRIN2B,ROR2,NRXN1,MEF2C,GRIK1,CDH2,GRM5,CACNG3,GRM3,NLGN1,CCR2                                                                                                                                                                                                                                                                                                                                                                                                                                                                                                                                                                                                                                                                                                                                                                                                                                                                                                                                                                                                                                                                                                                                                                                                                                                                                                                                                                                                                                                                                                                                                                                                                                                                                                                                                                                                                                                                                                                                                                                                                                                                                                                                                                                                                                                                                                                                                                                                                                                                                                                                                                                                                                                                                                                                                                                                                                                                       |
| GO:0051171 | regulation of nitrogen compound metabolic process | 0.00000802454965502688  | NOTCH2,BCAR3,MTOR,SPOCK1,WWC1,TRAPPC9,BNC2,NLK,FTO,KSR1,MGA,RFX7,ZNF236,PLCB1,ZNF536,ZFPM2,L3MBTL4,DLC1,TNRC6B,PDE4D,RDX,ERC1,BCL2,PRDM16,CHRNA7,EPC2,SPIRE1,ZEB1,RARB,SPRED1,MINAR1,ALK,AUTS2,FOXJ2,CDYL2,BABAM2,GLIS3,FANK1,ERBIN,ZNF880,MLLT3,EGLN3,SPON1,APC,ZNF595,TSHZ3,RBFOX3,RTN1,TCF4,CRKL,ILDR2,SOX5,SETD2,ERG,ZNF573,TNIK,PTPRJ,KDM4C,NEK4,TSHZ2,EGFR,ZNF280B,RFX3,USP14,ANGPT1,CDK12,BACH1,PRKACB,NEK7,NCOR1,RNF220,ZNF407,NEDD4,MAML2,MTRF1,SND1,SCAI,NSMCE2,BCL11A,SOX6,FLI1,RPRD1A,NTRK3,C5,FLT1,ZNF648,RFC3,ZNF382,TASP1,THRAP3,CAST,SLC8A3,PRKD1,PAK1,EPHA7,NCOA7,KHDRBS2,SPEN,RAPGEF2,PELI2,LRP2,RUNX2,TAOK3,ONECUT1,LDLRAD3,CPEB4,UBE2L3,LDB2,PUM3,SMYD3,RPTOR,GHR,SSBP3,CELF2,NEDD4L,HDAC9,ZHX3,ATF7IP,APBB2,APP,RPS6KA2,SAMSN1,KDM1B,ZNF600,NTF3,ACER2,PARP15,ZNF723,AURKA,PARN,ST18,PYGO1,SLC8A1,SSBP2,ANKRD31,DUX4,SERPINA6,PLGRKT,HIVEP2,BMPR1B,FMN2,ZNF717,ARNT,PAK3,ZNF257,DIP2B,LARP1,ITPKB,TRPC5,NBN,IFT57,INTS7,PRKCZ,SPOP,TAF15,DIP2A,MSH6,MCPH1,HECW1,MBNL2,PHF19,MRTFA,TAF4B,DUSP22,EBF2,YAP1,NFIA,WDR70,RIPK4,ZKSCAN5,MAPK1,MGAT5,ITIH5,USP25,KMT2E,PCGF5,PDGFD,NRG3,UBE20,SFMBT2,GFRA1,NIPBL,SPIDR,EWSR1,GABPA,ZNF735,CARD18,CHD6,STK38,PTPN13,KANSL1,LIMCH1,MBNL1,ATF6,EFEMP1,ZNF684,DCAF1,CCNG2,NF2,RBFOX1,HIVEP1,MOB3B,BIRC6,AKAP9,KLF15,PPARA,MEIS2,NFIB,MRTFB,PPP6R3,NR5A2,FOXJ3,PTPRK,TRERF1,EIF3D,DAPK1,AGO2,PHC3,JARID2,GATAD2B,IL34,BRWD1,ZNF846,BCAS3,WNT9B,ZNF606,CLPX,DUSP16,SMARCA4,USP8,PARD3,MAPKAP1,TNRC6C,PIAS1,EBF1,ATRX,NUAK1,PTPRT,ELAVL4,ABL1,MXI1,HDAC4,OXR1,SLC1A1,PRKAA1,ITGB3BP,MRPS27,CREG1,DROSHA,L3MBTL3,APLF,NFAT5,NBAS,PSMF1,SLFN11,RAP1A,GLIS1,MORC1,TOX3,CAMK4,BAZ2A,FGF10,ZC3HAV1,LATS2,NRG1,INO80D,AP3B1,ZNF438,ABCB7,ZBTB16,MUSK,ZNF675,SMARCA1,SETDB2,PRKCE,FOXK2,SLCO3A1,ME D15,NXN,ESRRG,ZNF718,CD44,PTPRO,EGF,PRRC1,PDE3A,LIM D1,PEX14,SPRED2,RPS6KA3,PTPN2,TRIM5,ATXN3,RFC1,ALG1OB,AMBRA1,KDM7A,OPRM1,HTR2A,FANCM,FANCA,DAZL,GTTF2F2,TAF3,RPRD1B,MARK2,EBF3,ZNF33B,FHL2,PUM1,MSH2,IGF2BP3,ANKRD17,ZNF397,SLC2A13,HIPK3,CDKN2C,KNDC1,SPSB4,CLSPN,NOS2,BICRAL,MNAT1,RBBP8,MDFIC,HMGA2,CCND3,BCL11B,ZIM3,CREM,MBP,TRPS1,PLCE1,TGFA,HIP1,CRIM1,PRR5L,UTP4,MYT1L,ZNF160,LDLRAD4,CNTN1,HSF5,SNX3,ZNF367,BRCA2,DISC1,ZBTB2,BLM,INTS8,LIN54,ZNF121,BMP2,RC3H2,TRAK1,PTCD2,ZC3H14,GFI1B,RANBP9,TMEM161A,ASXL3,RELN,HMGB1,GNAQ,FGF9,NFATC2,SH3BP5,CPAMD8,ZNF567,TRAF3,ZNF462,ESRP1,TTC21B,ETS2,GEMIN5,ZNF875,UIMC1,LRRFIP1,IKZF2,ATF1,SMARCA2,ETS1,GLI3,CGAS,SMARCC1,SNX6,AF F3,SMOC2,CNKSR3,VENTX,IDE,PRDM10,MYEF2,ZNF431,RERE,BTAF1,ZNF618,NEK10,MOB1B,ATF2,HIRA,CYLD,UMODL1,MAPK8IP1,HIVEP3,PSIP1,KPNA1,NELL1,ME2,RGMB,MRPL13,KITLG,CAMTA1,MYT1,YLPM1,RCAN1,GTTF2I,RORB,TADA2A,DAB1,MED27,ZNF208,RB1CC1,NMD3,PRKN,ZNF608,TBX20,SP110,MAPK10,DACH1,ZNF541,DPF3,GRIN2A,ARID5B,ATXN1,PRKCH,PKP1,IL6R,ALS2,NLRC5,ZNF627,ACO1,TFDP1,CNOT6L,MKNK1,SNX25,TOX,SLC4A4,PTPRB,ZFP90,COPS8,ZNF124,USP7,PLAGL1,SOX30,RALB,NPAS2,ROCK1,LYN,ZNF780B,CTSB,ZNF169,DTX1,BZW1,TENM2,OVOL2,PIWIL3,ZBTB33,ZFH3,ZNF44,BANP,SUP T16H,ARID1B,HOXC13,BAZ1A,CASZ1,INSR,YTHDF3,DEDD2,HECTD1,PBX3,SUMO2,ZNF292,POGK,SNAI2,ASH1L,HOXC4,BID,S |

|            |               |                        |                                                                                                                                                                                                                                                                                                                                                                                                                                                                                                                                                                                                                                                                                                                                                                                                                                                                                                                                                                                                                                                                                                                                                                                                                                                                                                                                                                                                                                                                                                                                                                                                                                                                                                                                                                                                                                                                                                                                                                                                                                                                                                                                                                                                                                                                                                                                                                                                                                                          |
|------------|---------------|------------------------|----------------------------------------------------------------------------------------------------------------------------------------------------------------------------------------------------------------------------------------------------------------------------------------------------------------------------------------------------------------------------------------------------------------------------------------------------------------------------------------------------------------------------------------------------------------------------------------------------------------------------------------------------------------------------------------------------------------------------------------------------------------------------------------------------------------------------------------------------------------------------------------------------------------------------------------------------------------------------------------------------------------------------------------------------------------------------------------------------------------------------------------------------------------------------------------------------------------------------------------------------------------------------------------------------------------------------------------------------------------------------------------------------------------------------------------------------------------------------------------------------------------------------------------------------------------------------------------------------------------------------------------------------------------------------------------------------------------------------------------------------------------------------------------------------------------------------------------------------------------------------------------------------------------------------------------------------------------------------------------------------------------------------------------------------------------------------------------------------------------------------------------------------------------------------------------------------------------------------------------------------------------------------------------------------------------------------------------------------------------------------------------------------------------------------------------------------------|
|            |               |                        | <p>IAH2,TRABD2B,RXRG,SP3,ERN2,ZNF879,MBTPS2,TIAL1,ELF2,NSD2,CARD10,TWIST2,CTIF,ENPP1,RASGRP1,SNX9,CSNK2A1,BMP5,CSF1,HDGFL3,SERPINB9,SCAF4,CTDP1,GRIN2B,INO80,FANCB,CLNS1A,SMAD5,CELF4,TCERG1,ABCG1,FOXN3,DCUN1D4,SLC40A1,PRAME,MYCL,MED1,CDC14B,IL33,GPRC5C,ROR2,ZNF521,BANK1,CSDE1,LMX1A,IL10,ACTR2,SFPQ,SCML2,PRAMEF25,RIOK1,PTH,PRKAA2,SOHLH1,LARP6,PHF20L1,ETV6,IQGA P1,CAMLG,ZBTB7C,TEAD1,SREBF2,ANP32B,YBX3,NRXN1,PCID2,ZNF234,ZNF518A,FRY,CENPE,LMX1B,NGDN,ELOC,TWIST1,ALKAL2,JAK2,VSX1,ZBTB38,ISX,MADD,PATL1,ZNF287,CELSR2,ZNF449,CREBBP,MELTF,TNKS,PCNA,UFL1,NFKBIA,PRKCB,ANXA4,RFC2,ZNF354C,ALX4,RTRAF,BRD4,ZBTB21,SERBP1,NEDD9,ITGA6,ASS1,ZNF528,ZNF611,CIDEA,ZBTB49,STOX2,AGO1,MEOX2,ELL2,STAT1,BRMS1L,NDFIP2,NR2C1,MAP2K6,GATAD1,MTPN,ABI1,CEMIP,PRAMEF2,POU6F2,IMPACT,CCBE1,PARK7,MAPK8,OAZ2,MED12L,ZSCAN30,UBL7,POU1F1,MTF2,NCAPG2,FOX P2,MYOCD,ZSCAN5C,CYFIP2,HNRNPM,ASCC2,ARID3B,MEF2C,ZNF613,ADGRB1,RXRA,WNT7A,MAP3K5,NDFIP1,MAP3K4,SERPINI2,PRDM13,FOXO6,ZNF112,MAGEL2,RAD51AP1,PDE2A,RAB38,DBF4B,FBXW8,SDCBP,NSMCE1,ZNF813,WWOX,ZBTB25,PASK,MLLT1,NCK1,SCAF8,FGR,CWC22,CDCA8,PPP2R3A,MLLT10,RNF8,EPHA4,INTS13,MECOM,DNMT3L,NTRK2,LHX9,ZBTB10,OCLN,CREB5,IREB2,PTK2,CDH5,ASCL3,CYFIP1,UBE3A,SEMA4D,SERPINB10,ZBTB20,ZNF66,RUNX1,KIRREL1,POMT2,ZNF845,SAMD13,NOS1AP,PDCL3,SRP9,CCDC88A,NSUN2,CHCHD2,TNFSF11,FYN,KDM5A,PCBP3,ZNF705G,PPM1F,HDAC2,SLF1,GON4L,TBX15,SH2D3C,PSME3IP1,DOCK3,TRNAU1AP,NCS1,ZFYVE28,MAPK9,PABPC1,SLC39A8,ROR1,TET1,ARNT2,HECW2,ITGA8,FBXL20,GRM5,SPOPL,ZNF705D,RPS6KA5,PID1,NRP1,MIDEAS,PRKCA,ATPCKMT,FHIT,ITGA1,ZNF615,KLF12,RC3H1,NRIP1,POR,ZNF850,ZNF235,ZNF738,SUPT3H,BCR,TUT4,ZNF215,TCERG1L,PRIM2,C14ORF39,TM9SF2,ELP2,FBLN1,STK36,RAG1,ZNF678,BMPE R,PRDM15,CUX1,ZNF420,MACROH2A1,MITF,EPHB2,BCL2L13,CD38,EYA4,DPH6,CDK14,MET,SPPL3,ZNF705B,CDH13,MED13L,SERPINB2,ATG5,MAGI2,PRDM11,UNK,MLIP,MYB,ZNF704,MFHAS1,SERPINB7,DHX29,BMP7,TNFAIP8,ZMYND8,RNF217,KCTD1,ZNF74,BPTF,ZMYND11,NUDT21,KMT2C,DDX6,PDGFC,BACE2,RFX2,PARBP,NECAB1,PKNOX2,EYA1,SLIT2,CNOT7,ESCO1,ERBB4,SERPINB11,GSAP,ROBO1,SAMD4A,PBX1,NPAS3,PRKCQ,ANTXR1,MGMT,ZNF679,SHLD2,NOS1,SLC6A3,PRR16,EFNA5,TCF12,ARHGEF11,NSD1,EHMT1,ESR1,KDM4B,LOXL2,PRLR,AGO3,HTT,FOX B1,CAMK1D,PIK3R3,FER,ZNF302,EYA2,INTS12,A2M,CHFR,ZNF721,JAZF1,ZNF578,ZNF891,SPOCK3,NRF1,ZNF14,PHC2,ROCK2,PRDM1,RORA,DMRT1,EIF4G3,PDK1,PSMD2,HERPUD1,NCOA6,COL4A3,WASHC1,ZFP30,BARD1,STK3,DEPTOR,ZNF423,ZNF568,HNRNPU,RAB3GAP2,IGF1R,PRKAG2,GLI2,THRB,AKAP13,DNM1L</p> |
| GO:0006811 | ion transport | 0.00001086004568719826 | <p>UNC80,CACNA2D3,SLC17A1,SLC24A2,KCNH5,MICU2,SLC25A21,SLC37A1,PIEZO2,DPP10,ITPR2,PDE4D,STXBP1,SLC44A5,BCL2,KCNMA1,CHRNA7,GABRB3,ANO6,CACNG2,SLC4A10,NEDD4,GRIK3,ATP2B2,TUSC3,GABRB1,GRIA1,SLC39A12,SLC8A3,PRKD1,CHRM3,LRP2,FGF12,GABRA6,TMEM38B,SLC24A3,SLC44A1,GRM7,THADA,NEDD4L,TRPM1,SLC39A11,APP,SLC7A2,CACNA1C,CACNB2,GABRG2,TMC1,SYT1,SLC8A1,KCNE4,AKAP6,HOMER2,CNK10,TRPC5,CLIC6,RYR3,HECW1,KCNJ1,ABCD3,TRPC7,SYT10,SLC16A1,NIPAL2,MICU1,LRRRC38,GRIK4,AKAP9,RASGRF2,KCNS3,GRM1,GABRG1,PLA2R1,DAPK1,SLC24A4,SEC14L1,SCN2A,ANK2,RYR2,SLC9C1,NKAIN3,SLC36A1,ABL1,SLC1A1,PRKAA1,SLC12A8,KCNH1,ANO4,NKAIN2,PLEKHA8,GRID2,GSGL1,RASGRF1,ATP11C,ABCB7,PRKCE,SLC3A1,SLMAP,WNK2,EGF,ABCC9,P2RX6,HTR2C,SLC2A3,ALG10B,ATP8A1,OPRM1,ABCC4,HTR2A,CYBRD1,CYP4A11,CNNM4,STAC,CNIH3,MAIP1,KCND2,NOS2,AFG3L2,ANK3,NIPA2,TMC7,TMEM163,ATP6V1E1,CNTN1,CACNA1I,KCNJ15,SLC10A7,SCN11A,NETO2,RELN,SLC23A2,SLC39A6,KCNH8,SLC37A2,SLC9A4,GABRR2,CNKSR3,GRIK2,LRRRC8B,CFT R,CHRM5,SLC30A10,SELENON,PRKN,HEPHL1,GRIN2A,JPH1,TR</p>                                                                                                                                                                                                                                                                                                                                                                                                                                                                                                                                                                                                                                                                                                                                                                                                                                                                                                                                                                                                                                                                                                                                                                                                                                                                                                                                                                                                                                        |

|            |                                       |                         |                                                                                                                                                                                                                                                                                                                                                                                                                                                                                                                                                                                                                                                                                                                                                                                                                                                                                                                                                                                                                                                                                                                                                                                                                                                                                                                                                                                                                                                                                                                                    |
|------------|---------------------------------------|-------------------------|------------------------------------------------------------------------------------------------------------------------------------------------------------------------------------------------------------------------------------------------------------------------------------------------------------------------------------------------------------------------------------------------------------------------------------------------------------------------------------------------------------------------------------------------------------------------------------------------------------------------------------------------------------------------------------------------------------------------------------------------------------------------------------------------------------------------------------------------------------------------------------------------------------------------------------------------------------------------------------------------------------------------------------------------------------------------------------------------------------------------------------------------------------------------------------------------------------------------------------------------------------------------------------------------------------------------------------------------------------------------------------------------------------------------------------------------------------------------------------------------------------------------------------|
|            |                                       |                         | PM6, CDH23, SLC12A1, TG, RACGAP1, KCNQ3, SHISA9, SLC4A4, SCN10A, KCND3, KCNN3, LYN, SLC44A2, SLC15A2, SLC13A5, CRACR2A, CUL5, GRID1, SLC52A1, COX5A, GABRG3, PLPP4, ZDHHC17, SLC22A14, ENPP1, UTRN, KCNC1, HCN1, GRIN2B, CLNS1A, KCNK5, SLC40A1, PSAP, SLC5A12, PLA2G4A, COX7A2L, LASP1, NRXN1, TWIST1, SLC1A7, MELTF, TRPV5, PRKCB, ABCC8, CACNA1E, ATP2B1, CLCA4, OTOF1, SLC6A1, NDFIP2, MAP2K6, SHROOM2, SLC6A11, KCNJ18, CEMIP, CBLIF, PARK7, ADCYAP1R1, PLA2G12B, ATP13A3, EFHB, MEF2C, NDFIP1, SLC5A9, ATP6V1C2, SLC10A6, NECTIN1, FLVCR1, ATP6V1B2, GABRA5, NTRK2, PLEKHA3, SHISA6, TRPM7, GRIK1, IREB2, DIAPH1, APOL1, SCARA5, SLC26A2, PLCZ1, NOS1AP, MTTP, SLC9A5, SLC27A6, SLC5A1, ANO10, TNFSF11, FYN, SCN8A, TMEM63C, NCS1, ATP5PF, NALCN, TRPM3, SLC39A8, SLC16A9, HECW2, GRM5, ATPSCKMT, KCNJ6, DPP6, EPHB2, TSPAN13, ATP6V0D2, CACNG3, ATG5, VMP1, SLC1A2, GABRA2, KCNIP4, TRDN, NLGN1, NOS1, SLC6A3, ASIC2, KCNQ5, CACNA2D1, HTT, SLC25A18, CCR2, ANO2, GRIA4, IL16, CATSPER2, RGS7, CLDN10, CLCN5, SLC13A4, PNPLA8, KCNAB1, ATP10A, DNMI1L                                                                                                                                                                                                                                                                                                                                                                                                                                                                       |
| GO:0098660 | inorganic ion transmembrane transport | 0.000017052823401408904 | CACNA2D3, SLC17A1, SLC24A2, KCNH5, MICU2, SLC37A1, DPP10, ITPR2, PDE4D, BCL2, KCNMA1, CHRNA7, GABRB3, ANO6, CACNG2, SLC4A10, NEDD4, ATP2B2, TUSC3, GABRB1, SLC39A12, SLC8A3, PRKD1, FGF12, GABRA6, TMEM38B, SLC24A3, THADA, NEDD4L, TRPM1, SLC39A11, CACNA1C, CACNB2, GABRG2, TMC1, SLC8A1, KCNE4, AKAP6, KCNK10, TRPC5, CLIC6, RYR3, HECW1, KCNJ1, TRPC7, NIPAL2, MICU1, LRRC38, AKAP9, KCNS3, GABRG1, SLC24A4, SCN2A, ANK2, RYR2, SLC9C1, SLC36A1, ABL1, SLC1A1, SLC12A8, KCNH1, ANO4, ABCB7, PRKCE, SLMAP, WNK2, ABCC9, HTR2C, ALG10B, OPRM1, HTR2A, CNM4, STAC, MAIP1, KCND2, AFG3L2, ANK3, NIPA2, TMEM163, ATP6V1E1, CACNA1I, KCNJ15, SCN11A, NETO2, SLC39A6, KCNH8, SLC37A2, SLC9A4, GABRR2, CNKSR3, CFTR, SLC30A10, SELENON, GRIN2A, JPH1, TRPM6, SLC12A1, KCNQ3, SLC4A4, SCN10A, KCND3, KCNN3, LYN, SLC15A2, CRACR2A, CUL5, COX5A, GABRG3, ZDHHC17, UTRN, KCNC1, HCN1, GRIN2B, KCNK5, SLC40A1, COX7A2L, TWIST1, TRPV5, ABCC8, CACNA1E, ATP2B1, CLCA4, OTOF1, SLC6A1, SHROOM2, SLC6A11, KCNJ18, CEMIP, CBLIF, PARK7, ADCYAP1R1, ATP6V1C2, ATP6V1B2, GABRA5, TRPM7, DIAPH1, APOL1, SCARA5, SLC26A2, NOS1AP, SLC9A5, SLC5A1, ANO10, FYN, SCN8A, NCS1, ATP5PF, NALCN, TRPM3, SLC39A8, HECW2, GRM5, ATPSCKMT, KCNJ6, DPP6, TSPAN13, ATP6V0D2, CACNG3, ATG5, VMP1, GABRA2, KCNIP4, TRDN, NOS1, SLC6A3, ASIC2, KCNQ5, CACNA2D1, HTT, SLC25A18, ANO2, CATSPER2, RGS7, CLCN5, SLC13A4, KCNAB1                                                                                                                                       |
| GO:0033036 | macromolecule localization            | 0.000017503758514173714 | NSG1, ABCA13, IMMP2L, LONP2, FTO, MX2, CLTCL1, SNAP25-AS1, DPP10, ZDHHC21, RIPOR2, RDX, STXBP1, ERC1, RALA, BCL2, MYO5A, FBN1, GPHN, COG5, GPR158, RIMS1, PIK3C3, SPIRE1, CNTLN, EXOC6B, TRAPPC8, USH2A, CEP192, RIMS2, ERBIN, FCHO2, ANO6, CACNG2, GPC6, CNTNAP2, APC, CRKL, ILDR2, SETD2, TANGO6, TNK1, EGFR, RFX3, DENND1A, ANGPT1, MACF1, NEDD4, GNPTAB, CRB1, ZFAND6, DNAJC13, RABEP1, TTC39B, NUP214, TOM1L2, CEP128, PRKD1, GRAMD1B, RAPGEF2, LRP2, AGK, RANBP17, UBE2L3, PTPRN2, SMYD3, HERC2, SEPTIN9, EPB41L3, NEDD4L, ADAM10, CACNB2, DCLK1, MAPRE2, VCL, ARHGAP44, NDUFAF2, CD2AP, AURKA, PARN, PYGO1, ABCG8, ABCD2, FMN2, AKAP6, RAB8B, RFTN1, RANBP2, TRPC5, RAP1GDS1, KICS2, CUBN, SCP2, PRKCZ, MCPH1, RAB27B, CNST, ABCA5, YAP1, SEM1, VPS35L, CADPS2, ABCD3, RABGAP1L, SGTB, ADAM22, COPB1, SYCP1, NIPBL, SLC16A1, SPIDR, IPO11, CORO2B, PAFAH1B1, TM7SF3, VPS13D, TLK1, NF2, RBFOX1, ZDHHC14, CTNNA1, PPARA, SNX30, PTPRK, PARD3B, PLA2R1, VPS13C, DNAH11, JARID2, RAB22A, DNAJC15, CPE, ANK2, ADGRV1, BCAS3, RYR2, BBS2, RANBP3L, NBEA, DUSP16, USP8, FABP7, PARD3, TBC1D5, BLK, ATRX, ABL1, SLC1A1, PRKAA1, FHIP1A, PRELID2, ANO4, CCDC91, EIPR1, NBAS, RAP1A, GPC5, ZNHIT6, PLEKHA8, FGF10, GRID2, LATS2, AP3B1, ATP11C, SYNE1, ZBTB16, MUSK, PRKCE, SLC03A1, SLMAP, DENND4C, CEP83, FBN2, EGF, PEX14, ATP8A2, SCG5, PTPN2, TRIM5, ATXN3, RIC3, ATP8A1, RFTN2, LTBP1, OPRM1, ABCC4, HTR2A, CYP4A11, STAC, TAF3, ABHD17C, MSH2, IGF2BP3, APBA2, MAIP1, TNPO3, ABCA10, NOS2, TTC7B, MDFIC, ANK3, COG2, VPS41, L |

|            |                                         |                         |                                                                                                                                                                                                                                                                                                                                                                                                                                                                                                                                                                                                                                                                                                                                                                                                                                                                                                                                                                                                                                                                                                                                                                                                                                                                                                                                                                                                                                                                                                                                                                                                                                                                                                                                                                                                                                                                                                                                                                                                                                                                                                                                                                                                                                                                                                                                       |
|------------|-----------------------------------------|-------------------------|---------------------------------------------------------------------------------------------------------------------------------------------------------------------------------------------------------------------------------------------------------------------------------------------------------------------------------------------------------------------------------------------------------------------------------------------------------------------------------------------------------------------------------------------------------------------------------------------------------------------------------------------------------------------------------------------------------------------------------------------------------------------------------------------------------------------------------------------------------------------------------------------------------------------------------------------------------------------------------------------------------------------------------------------------------------------------------------------------------------------------------------------------------------------------------------------------------------------------------------------------------------------------------------------------------------------------------------------------------------------------------------------------------------------------------------------------------------------------------------------------------------------------------------------------------------------------------------------------------------------------------------------------------------------------------------------------------------------------------------------------------------------------------------------------------------------------------------------------------------------------------------------------------------------------------------------------------------------------------------------------------------------------------------------------------------------------------------------------------------------------------------------------------------------------------------------------------------------------------------------------------------------------------------------------------------------------------------|
|            |                                         |                         | <p>YPLA1, HIP1, PRR5L, VPS37A, EFR3A, TJP1, NPHP4, PACSIN2, SNX3, BHLHE40-</p> <p>AS1, BRCA2, DISC1, WDPCP, SLC10A7, LRP1B, STX12, ATP9A, TRAK1, MSR1, VRK1, GNAI1, MYRIP, SLC15A5, RELN, NUDCD3, CDS2, AP4E1, FGF9, MYOM1, UNC13B, TTC21B, PLS1, SNX8, SEC23B, NIN, CCDC186, GLI3, SNX6, PACS1, MAP2, PEX6, RRBP1, ATF2, BBS4, KIAA0753, CFTR, KPNA1, CSE1L, DOP1B, TBC1D13, PHAF1, ATP10B, NMD3, AKAP10, PRKN, LYST, GRIN2A, PRKCH, FRMD4A, ALS2, SNX25, FBLN5, TSPAN33, LRBA, MAP7, MON2, MESD, MYO1D, SEC24D, ROCK1, SEL1L, SUMO3, SLC15A2, CHKA, RRAGD, BANP, NPIPA1, DMBT1, HECTD1, SHROOM3, XRCC4, COLQ, ARFGEF1, BID, PI3K, OSBPL10, RPH3A, ABCA4, UFD1, TOM1, ZDHHC17, NSD2, ESYT2, SH3GLB1, CARD10, TMED3, XKR5, ENPP1, IGSF11, SNX9, WDR72, NUP37, BCL2L1, HCN1, ABCG1, FAM149B1, CIDEA, PSAP, CFHR4, MICALL2, MED1, ATG4B, PCNT, IL10, PRKAA2, NDC80, PACRG, VSTM2A, PLA2G4A, SCFD2, CAMLG, SREBF2, ANP32B, FYB2, NRXN1, PCID2, SNAP91, PEG10, JAK2, RPF2, CELSR2, TNKS, ARL11, SIAH3, UFL1, NFKBIA, PRKCB, GOT2, ABCC8, MIPEP, RTRAF, USHC1, NEDD9, TMCL1, GRIP1, TM9SF3, SAR1A, XKR6, CIDEA, BBS9, EXOC1, HEPACAM, NDFIP2, MAP2K6, SHROOM2, RN7SL483P, CEMIP, PARK7, MAPK8, ITGA4, OAZ2, BCAP29, UBE2J2, PLA2G12B, NDC1, TM9SF4, RAPGEF4, CEP120, ARL4C, STOML1, RXRA, WNT7A, NDFIP1, CHAMP1, SLC10A6, RAB38, SDCBP, NECTIN1, TRIM23, SNAP29, INTS13, NUMB, ADAMTS9, RN7SL767P, PLEKHA3, OCLN, SHISA6, AKAP11, KTN1, MVB12B, MARK4, CDH5, APOL2, AP4S1, CLDN18, MPP7, DIAPH1, SCAMP1, SCG3, APOL1, PITPNC1, FRMD6, AP2B1, HEATR5A, ZFYVE1, ICA1, MTPP, SRP9, CCDC88A, NSUN2, SLC27A6, BICD1, TNFSF11, FYN, PPM1F, ARL13B, XPO7, ODR4, SLF1, ATP9B, EHPB1, MAPK9, ASB3, CDH2, ITGA8, GPR137B, ZDHHC18, TBC1D1, PID1, NRP1, FCHSD2, RNF215, CROT, NRIP1, ABCA6, MCC, BCR, ARFGAP3, TM9SF2, B9D1, BMPER, RABL2A, DPP6, MACROH2A1, EPHB2, CD38, MYO5B, RGPD4, PPIL2, AKAIN1, DLG2, STXBP4, CACNG3, MAGI2, VMP1, GNAS, MFHAS1, NUP43, BMP7, ASTN2, DLG5, GAPVD1, DDX6, PLIN2, VPS13B, EXOC4, FAM126A, KCNIP4, ERBB4, FAM3B, FAM126B, SYNDIG1, RGPD2, SAMM50, SORCS2, NLGN1, ASIC2, EFNA5, GAS2L1, KIF13A, AP5M1, ESR1, ZDHHC11B, PITPNM3, OSBPL5, OSBPL6, AGAP1, ROCK2, CDCA5, RAB31, HERPUD1, WASHC1, HOOK3, BARD1, STK3, ZNF423, PNPLA8, HNRNPU, VTI1A, CEP72, RAB3GAP2, CADPS, TANGO2, MORC3, ATP10A, SEPTIN6, DNMI1L</p> |
| GO:0080090 | regulation of primary metabolic process | 0.000018044265034162777 | <p>NOTCH2, BCAR3, MTOR, SPOCK1, WWC1, TRAPPC9, BNC2, NLK, LONP2, FTO, KSR1, MGA, RFX7, ZNF236, PLCB1, ZNF536, ZFPM2, L3MBTL4, DLC1, TNRC6B, PDE4D, RDX, ERC1, BCL2, PRDM16, CHRNA7, EPIC2, SPIRE1, ZEB1, AKRIC3, RARB, SPRED1, MINAR1, ALK, AUTS2, FOXJ2, CDYL2, BABAM2, GLIS3, FANK1, ERBIN, ZNF880, MLLT3, EGLN3, SPON1, APC, ZNF595, TSHZ3, RBFOX3, RTN1, TCF4, CRKL, ILDR2, SOX5, SETD2, ERG, ZNF573, TNK1, PTPRJ, KDM4C, NEK4, TSHZ2, EGFR, ZNF280B, RFX3, USP14, ANGPT1, CDK12, BAGAP1, PRKCB, NEK7, NCOR1, RNF220, ZNF407, NEDD4, MAML2, MTRF1, SND1, SCAI, NSMCE2, BCL11A, SOX6, FLI1, RPRD1A, NTRK3, C5, FLT1, ZNF648, RFC3, ZNF382, TASP1, THRAP3, CAST, TTC39B, SLC8A3, MALRD1, PRKD1, PAK1, EPHA7, NCOA7, KHDRBS2, SPEN, RAPGEF2, PELI2, LRP2, RUNX2, TAOK3, ONECUT1, LDLRAD3, CPEB4, UBE2L3, LDB2, PUM3, SMYD3, RPTOR, GHR, SSBP3, CELF2, NEDD4L, HDAC9, ZHX3, ATF7IP, APBB2, APP, RPS6KA2, SAMSIN1, KDM1B, ZNF600, NTF3, ACER2, PARP15, ZNF723, AURKA, PARN, ST18, PYGO1, SLC8A1, SSBP2, ANKRD31, DUX4, SERPINA6, PLGRKT, HIVEP2, ABCD2, BMPR1B, FMN2, ZNF717, ARNT, PAK3, ZNF257, DIP2B, RANBP2, LARP1, ITPKB, TRPC5, NBN, SCP2, IFT57, INTS7, PRKCZ, SPOB, GRB10, TAF15, DIP2A, MSH6, MCPH1, HECW1, MBNL2, PHF19, MRTFA, TAF4B, DUSP22, EBF2, YAP1, NFIA, WDR70, RIPK4, ZKSCAN5, MAPK1, MGAT5, ITIH5, USP25, KMT2E, PCGF5, PDGFD, NRG3, UBE20, SFMBT2, GFRA1, NIPBL, SPIDR, EWSR1, GABPA, ZNF735, CARD18, CHD6, STK38, PTPN13, KANSL1, LIMCH1, MBNL1, ATF6, EFEMP1, ZNF684, DCAF1, CCNG2, NF2, RBFOX1, HIVEP1, MOB3B, BIRC6, AKAP9, KLF15, PPARA, MEIS2, NFIB, MRTFB, PPP6R3, NR5A2, FOXJ3, PTPRK, TRERF1, EIF3D, DAPK1, AGO2, PHC3, JARID2, DNAJC15, GATA</p>                                                                                                                                                                                                                                                                                                                                                                                                                                                                                                                                                                                                                                                        |

|  |  |  |                                                                                                                                                                                                                                                                                                                                                                                                                                                                                                                                                                                                                                                                                                                                                                                                                                                                                                                                                                                                                                                                                                                                                                                                                                                                                                                                                                                                                                                                                                                                                                                                                                                                                                                                                                                                                                                                                                                                                                                                                                                                                                                                                                                                                                                                                                                                                                                                                                                                                                                                                                                                                                                                                                                                                                                                                                                                                                                                                                                                                                                                                                                                                                                                                                                                                                                                                                                                                                                                                                                                                                                                                                                                                                                                                                                                                                                                                                                                                                                                                                                                                                                                                                                                                                                                                                                             |
|--|--|--|-----------------------------------------------------------------------------------------------------------------------------------------------------------------------------------------------------------------------------------------------------------------------------------------------------------------------------------------------------------------------------------------------------------------------------------------------------------------------------------------------------------------------------------------------------------------------------------------------------------------------------------------------------------------------------------------------------------------------------------------------------------------------------------------------------------------------------------------------------------------------------------------------------------------------------------------------------------------------------------------------------------------------------------------------------------------------------------------------------------------------------------------------------------------------------------------------------------------------------------------------------------------------------------------------------------------------------------------------------------------------------------------------------------------------------------------------------------------------------------------------------------------------------------------------------------------------------------------------------------------------------------------------------------------------------------------------------------------------------------------------------------------------------------------------------------------------------------------------------------------------------------------------------------------------------------------------------------------------------------------------------------------------------------------------------------------------------------------------------------------------------------------------------------------------------------------------------------------------------------------------------------------------------------------------------------------------------------------------------------------------------------------------------------------------------------------------------------------------------------------------------------------------------------------------------------------------------------------------------------------------------------------------------------------------------------------------------------------------------------------------------------------------------------------------------------------------------------------------------------------------------------------------------------------------------------------------------------------------------------------------------------------------------------------------------------------------------------------------------------------------------------------------------------------------------------------------------------------------------------------------------------------------------------------------------------------------------------------------------------------------------------------------------------------------------------------------------------------------------------------------------------------------------------------------------------------------------------------------------------------------------------------------------------------------------------------------------------------------------------------------------------------------------------------------------------------------------------------------------------------------------------------------------------------------------------------------------------------------------------------------------------------------------------------------------------------------------------------------------------------------------------------------------------------------------------------------------------------------------------------------------------------------------------------------------------------------------|
|  |  |  | D2B, IL34, BRWD1, ZNF846, BCAS3, WNT9B, ZNF606, CLPX, DUSP1<br>6, SMARCA4, USP8, PARD3, MAPKAP1, TNRC6C, PIAS1, EBF1, ATRX<br>, NUA1, PTPRT, ELAVL4, ABL1, MXI1, HDAC4, OXR1, SLC1A1, PRK<br>AA1, ITGB3BP, MRPS27, CREG1, DROSHA, L3MBTL3, APLF, NFAT5,<br>NBAS, PSMF1, SLFN11, RAP1A, GLIS1, MORC1, TOX3, CAMK4, BAZ2<br>A, FGF10, ZC3HAV1, LATS2, NRG1, INO80D, AP3B1, ZNF438, ZBTB<br>16, MUSK, ZNF675, SMARCA1, SETDB2, PRKCE, FOXK2, SLC3A1,<br>MED15, NXN, ESRRG, ZNF718, CD44, PTPRO, EGF, PRRC1, PDE3A, L<br>IMD1, PEX14, SPRED2, RPS6KA3, MTMR3, PTPN2, TRIM5, ATXN3, R<br>FC1, HTR2C, ALG10B, AMBRA1, KDM7A, HTR2A, FANCM, FANCA, DAZ<br>L, GTF2F2, TAF3, RPRD1B, MARK2, EBF3, ZNF33B, FHL2, PUM1, MS<br>H2, IGF2BP3, ANKRD17, ZNF397, SLC2A13, HIPK3, CDKN2C, KNDC<br>1, SPSB4, CLSPN, NOS2, BICRAL, MNAT1, RBBP8, MDFIC, HMGA2, C<br>CND3, BCL11B, ZIM3, CREM, MBP, TRPS1, PLCE1, TGFA, HIP1, CRI<br>M1, PRR5L, UTP4, MYT1L, ZNF160, LDLRAD4, CNTN1, HSF5, SNX3,<br>ZNF367, BRCA2, DISC1, ZBTB2, BLM, INTS8, LIN54, ZNF121, BMP<br>2, RC3H2, TRAK1, SOGA1, PTC2, ZC3H14, GFI1B, RANBP9, TMEM1<br>61A, ASXL3, RELN, HMGB1, GNAQ, FGF9, NFATC2, SH3BP5, CPAMD8<br>, ZNF567, TRAF3, ZNF462, ESRP1, TTC21B, ETS2, GEMIN5, ZNF87<br>5, UIMC1, LRRFIP1, IKZF2, ATF1, SMARCA2, ETS1, GLI3, CGAS, S<br>MARCC1, SNX6, AFF3, SMOC2, CNKSR3, VENTX, IDE, PRDM10, MYEF<br>2, ZNF431, RERE, BTAF1, ZNF618, NEK10, MOB1B, ATF2, HIRA, CY<br>LD, UMODL1, BBS4, MAPK8IP1, HIVEP3, PSIP1, KPNA1, NELL1, ME<br>2, RGM, MRPL13, KITLG, CAMTA1, MYT1, CHRM5, YLPM1, RCAN1, G<br>TF2I, RORB, TADA2A, DAB1, MED27, ZNF208, RB1CC1, NMD3, PRKN<br>, MTMR2, ZNF608, TBX20, SP110, MAPK10, DACH1, ZNF541, DPF3,<br>GRIN2A, ARID5B, ATXN1, PRKCH, PKP1, IL6R, ALS2, NLRC5, ZNF6<br>27, ACO1, TFDP1, CNOT6L, MKNK1, SNX25, TOX, SLC4A4, PTPRB, Z<br>FP90, COPS8, ZNF124, USP7, VAV3, PLAGL1, SOX30, RALB, NPAS2<br>, ROCK1, LYN, ZNF780B, CTSB, ZNF169, DTX1, BZW1, TENM2, OVOL<br>2, PIWIL3, ZBTB33, ZFH3, ZNF44, BANP, SUPT16H, ARID1B, HOX<br>C13, BAZ1A, CASZ1, INSR, YTHDF3, DEDD2, HECTD1, PBX3, SUMO2<br>, ZNF292, POGK, SNAI2, ASH1L, HOXC4, BID, SIAH2, TRABD2B, RX<br>RG, SP3, ERN2, ZNF879, MBTPS2, TIAL1, ELF2, NSD2, CARD10, TW<br>IST2, CTIF, ENPP1, RASGRP1, SNX9, CSNK2A1, BMP5, CSF1, HDGF<br>L3, SERPINB9, SCAF4, CTDP1, GRIN2B, INO80, FANCB, CLNS1A, S<br>MAD5, CELF4, TCERG1, ABCG1, FOXN3, DCUN1D4, SLC40A1, PRAME<br>, MYCL, PSAP, LPGAT1, MED1, CDC14B, IL33, GPRC5C, ROR2, ZNF5<br>21, BANK1, CSDE1, LMX1A, IL10, ACTR2, SFPQ, SCML2, PRAMEF25<br>, RIOK1, PTH, PRKAA2, SOHLH1, LARP6, PHF20L1, ETV6, IQGAP1,<br>CAMLG, ZBTB7C, TEAD1, SREBF2, ANP32B, YBX3, NRXN1, PCID2, Z<br>NF234, ZNF518A, FRY, CENPE, LMX1B, NGDN, ELOC, TWIST1, ALKA<br>L2, JAK2, VSX1, ZBTB38, ISX, MADD, PATL1, ZNF287, CELSR2, ZN<br>F449, CREBBP, MELTF, TNKS, PCNA, UFL1, NFKB1A, PRKCB, ANXA4<br>, RFC2, ZNF354C, ALX4, RTRAF, BRD4, ZBTB21, SERBP1, NEDD9, I<br>TGA6, ZNF528, ERLIN2, ZNF611, CIDEA, ZBTB49, STOX2, AGO1, M<br>EOX2, ELL2, STAT1, BRMS1L, NDFIP2, NR2C1, MAP2K6, GATAD1, M<br>TPN, ABI1, CEMIP, PRAMEF2, POU6F2, IMPACT, CCBE1, PARK7, MA<br>PK8, OAZ2, MED12L, ZSCAN30, UBL7, POU1F1, ADCYAP1R1, MTF2,<br>NCAPG2, FOXP2, MYOCD, ZSCAN5C, CYFIP2, HNRNPM, ASCC2, ARID<br>3B, MEF2C, ZNF613, ADGRB1, RXRA, WNT7A, MAP3K5, NDFIP1, MAP<br>3K4, SERPINI2, PRDM13, FOXO6, ZNF112, MAGEL2, RAD51AP1, PD<br>E2A, RAB38, DBF4B, FBXW8, SDCBP, NSMCE1, ZNF813, WWOX, ZBTB<br>25, PASK, MLLT1, NCK1, SCAF8, FGR, CWC22, CDCA8, PPP2R3A, ML<br>LT10, RNF8, EPHA4, INTS13, MECOM, DNMT3L, NTRK2, LHX9, ZBTB<br>10, OCLN, CREB5, IREB2, PTK2, CDH5, ASCL3, CYFIP1, UBE3A, SE<br>MA4D, SERPINB10, ZBTB20, ZNF66, RUNX1, KIRREL1, POMT2, ZNF<br>845, SAMD13, NOS1AP, PDCL3, SRP9, CCDC88A, NSUN2, CHCHD2, T<br>NFSF11, FYN, KDM5A, PCBP3, ZNF705G, PPM1F, HDAC2, SLF1, GON<br>4L, TBX15, SH2D3C, PSME3IP1, DOCK3, TRNAU1AP, NCS1, ZFYVE2<br>8, MAPK9, PABPC1, SLC39A8, ROR1, OPA3, TET1, ARNT2, HECW2, I<br>TGA8, FBXL20, GRM5, SPOPL, ZNF705D, RPS6KA5, PID1, NRP1, MI<br>DEAS, PRKCA, ATPSCMT, FHIT, ITGA1, ZNF615, KLF12, RC3H1, N<br>RIP1, POR, ZNF850, ZNF235, ZNF738, SUPT3H, TUT4, ZNF215, TC<br>ERG1L, PRIM2, C14ORF39, TM9SF2, ELP2, FBLN1, STK36, RAG1, Z<br>NF678, BMPER, PRDM15, CUX1, ZNF420, MACROH2A1, MITF, EPHB2 |
|--|--|--|-----------------------------------------------------------------------------------------------------------------------------------------------------------------------------------------------------------------------------------------------------------------------------------------------------------------------------------------------------------------------------------------------------------------------------------------------------------------------------------------------------------------------------------------------------------------------------------------------------------------------------------------------------------------------------------------------------------------------------------------------------------------------------------------------------------------------------------------------------------------------------------------------------------------------------------------------------------------------------------------------------------------------------------------------------------------------------------------------------------------------------------------------------------------------------------------------------------------------------------------------------------------------------------------------------------------------------------------------------------------------------------------------------------------------------------------------------------------------------------------------------------------------------------------------------------------------------------------------------------------------------------------------------------------------------------------------------------------------------------------------------------------------------------------------------------------------------------------------------------------------------------------------------------------------------------------------------------------------------------------------------------------------------------------------------------------------------------------------------------------------------------------------------------------------------------------------------------------------------------------------------------------------------------------------------------------------------------------------------------------------------------------------------------------------------------------------------------------------------------------------------------------------------------------------------------------------------------------------------------------------------------------------------------------------------------------------------------------------------------------------------------------------------------------------------------------------------------------------------------------------------------------------------------------------------------------------------------------------------------------------------------------------------------------------------------------------------------------------------------------------------------------------------------------------------------------------------------------------------------------------------------------------------------------------------------------------------------------------------------------------------------------------------------------------------------------------------------------------------------------------------------------------------------------------------------------------------------------------------------------------------------------------------------------------------------------------------------------------------------------------------------------------------------------------------------------------------------------------------------------------------------------------------------------------------------------------------------------------------------------------------------------------------------------------------------------------------------------------------------------------------------------------------------------------------------------------------------------------------------------------------------------------------------------------------------------------------|



|            |                                                            |                        |                                                                                                                                                                                                                                                                                                                                                                                                                                                                                                                                                                                                                                                                                                                                                                                                                                                                                                                                                                                                                                                                                                                                                                                                                                                                                                                                                                                                                                                                                                                                                                                                                                                                                                                                                                                                                                                                                                                                                                                                                                                                                                                                                                                                                                                                                                                                                                                                                                                                                                                                                                                                                                                                                                                                                                                                                                                                                                                                                                                                                                                                                                                                                                                                                           |
|------------|------------------------------------------------------------|------------------------|---------------------------------------------------------------------------------------------------------------------------------------------------------------------------------------------------------------------------------------------------------------------------------------------------------------------------------------------------------------------------------------------------------------------------------------------------------------------------------------------------------------------------------------------------------------------------------------------------------------------------------------------------------------------------------------------------------------------------------------------------------------------------------------------------------------------------------------------------------------------------------------------------------------------------------------------------------------------------------------------------------------------------------------------------------------------------------------------------------------------------------------------------------------------------------------------------------------------------------------------------------------------------------------------------------------------------------------------------------------------------------------------------------------------------------------------------------------------------------------------------------------------------------------------------------------------------------------------------------------------------------------------------------------------------------------------------------------------------------------------------------------------------------------------------------------------------------------------------------------------------------------------------------------------------------------------------------------------------------------------------------------------------------------------------------------------------------------------------------------------------------------------------------------------------------------------------------------------------------------------------------------------------------------------------------------------------------------------------------------------------------------------------------------------------------------------------------------------------------------------------------------------------------------------------------------------------------------------------------------------------------------------------------------------------------------------------------------------------------------------------------------------------------------------------------------------------------------------------------------------------------------------------------------------------------------------------------------------------------------------------------------------------------------------------------------------------------------------------------------------------------------------------------------------------------------------------------------------------|
|            |                                                            |                        | , BCL2L13, CD38, EYA4, DPH6, CDK14, MET, SPPL3, ZNF705B, CDH13, MED13L, SERPINB2, ATG5, MAGI2, PRDM11, UNK, MLIP, MYB, ZNF704, MFHAS1, SERPINB7, DHX29, BMP7, TNFAIP8, ZMYND8, RNF217, KCTD1, ZNF74, BPTF, ZMYND11, NUDT21, KMT2C, DDX6, ADGRF5, PDGFC, BACE2, RFX2, PARPBP, NECAB1, PKNOX2, EYA1, SLIT2, CNOT7, ESCO1, ERBB4, SERPINB11, GSAP, ROBO1, SAMD4A, PBX1, NPAS3, PRKCQ, ANTXR1, MGMT, ZNF679, SHLD2, NOS1, SLC6A3, PRR16, EFNA5, TCF12, ARHGEF11, NSD1, EHMT1, ESR1, KDM4B, LOXL2, PRLR, AGO3, HTT, FOXB1, CAMK1D, PIK3R3, FER, ZNF302, EYA2, INTS12, A2M, CHFR, ZNF721, JAZF1, ZNF578, ZNF891, SPOCK3, NRF1, ZNF14, HRH1, PHC2, ROCK2, PRDM1, RORA, DMRT1, EIF4G3, PDK1, PSMD2, HERPUD1, NCOA6, COL4A3, WASHC1, ZFP30, BARD1, STK3, DEPTOR, ZNF423, ZNF568, HNRNPU, RAB3GAP2, IGF1R, PRKAG2, GLI2, THRB, AKAP13, DNMT1L                                                                                                                                                                                                                                                                                                                                                                                                                                                                                                                                                                                                                                                                                                                                                                                                                                                                                                                                                                                                                                                                                                                                                                                                                                                                                                                                                                                                                                                                                                                                                                                                                                                                                                                                                                                                                                                                                                                                                                                                                                                                                                                                                                                                                                                                                                                                                                                       |
| GO:0051173 | positive regulation of nitrogen compound metabolic process | 0.00001841992416122705 | BCAR3, MTOR, WWC1, FTO, MGA, PLCB1, ZFPM2, DLC1, TNRC6B, RDX, BCL2, PRDM16, CHRNA7, EPC2, SPIRE1, ZEB1, RARB, ALK, AUTS2, FOXJ2, BABAM2, GLIS3, FANK1, MLLT3, EGLN3, SPON1, APC, TCF4, CRKL, ERG, TNIK, PTPRJ, NEK4, EGFR, RFX3, ANGPT1, CDK12, BACH1, NEK7, ZNF407, NEDD4, MAML2, BCL11A, FLI1, NTRK3, FLT1, RFC3, TASP1, THRAP3, PRKD1, PAK1, EPHA7, NCOA7, RAPGEF2, PELI2, LRP2, RUNX2, TAOX3, ONECUT1, UBE2L3, LDB2, SMYD3, RPTOR, GHR, SSBP3, NEDD4L, ATF7IP, APBB2, APP, KDM1B, ZNF600, NTF3, ACER2, AURKA, PARN, ST18, PYGO1, SSBP2, ANKRD31, DUX4, PLGRKT, BMPR1B, FMN2, ZNF717, ARNT, PAK3, DIP2B, LARP1, TRPC5, NBN, IFT57, PRKCZ, TAF15, DIP2A, HECW1, PHF19, MRTFA, TAF4B, EBF2, YAP1, NFIA, MAPK1, KMT2E, PCGF5, PDGFD, NRG3, GFR, A1, NIPBL, SPIDR, GABPA, CHD6, KANSL1, LIMCH1, ATF6, HIVEP1, MOB3B, AKAP9, KLF15, PPARA, MEIS2, NFIB, MRTFB, NR5A2, FOXJ3, TRERF1, EIF3D, DAPK1, AGO2, JARID2, GATAD2B, IL34, BCAS3, ZNF606, CLPX, SMARCA4, MAPKAP1, TNRC6C, PIAS1, ATRX, ABL1, HDAC4, SLC1A1, PRKAA1, MRPS27, APLF, NFAT5, RAP1A, GLIS1, TOX3, CAMK4, FGF10, ZC3HAV1, NRG1, INO80D, AP3B1, ZNF438, ABCB7, ZBTB16, MUSK, FOXK2, SLCO3A1, MED15, ESRRG, CD44, EGFR, PRRC1, RPS6KA3, TRIM5, ATXN3, RFC1, ALG10B, AMBRA1, KDM7A, OPRM1, HTR2A, FANCM, DAZL, GTF2F2, TAF3, RPRD1B, MARK2, EBF3, ZNF33B, PUM1, MSH2, SLC2A13, KND1, SPSB4, CLSPN, NOS2, BICRAL, MNAT1, RBBP8, MDFIC, HMGA2, CCND3, BCL11B, CREM, MBP, TGFA, HIP1, PRR5L, CNTN1, BRCA2, DISC1, BLM, BMP2, RC3H2, GFI1B, RANBP9, TMEM161A, ASXL3, RELN, HMGB1, FGF9, NFATC2, ZNF462, ETS2, UIMC1, ATF1, SMARCA2, ETS1, GLI3, SMARCC1, SMO2, VENTX, IDE, PRDM10, RERE, NEK10, MOB1B, ATF2, HIVEP3, PSIP1, RGM, KITLG, CAMTA1, GTF2I, RORB, TADA2A, DAB1, MED27, ZNF208, RB1CC1, NMD3, PRKN, TBX20, DPF3, GRIN2A, ARID5B, IL6R, ALS2, NLRC5, TFDP1, CNOT6L, TOX, SLC4A4, ZFP90, COPS8, USP7, PLAGL1, SOX30, RALB, NPAS2, ROCK1, LYN, ZNF780B, DTX1, OVOL2, ZFH3, BANP, SUPT16H, ARID1B, HOXC13, BAZ1A, CASZ1, INSR, YTHDF3, HECTD1, PBX3, SUMO2, ZNF292, SNAI2, ASH1L, HOXC4, BID, TRABD2B, RXRG, SP3, ERN2, MBTPS2, ELF2, NSD2, CARD10, CTIF, RASGRP1, SNX9, CSNK2A1, BMP5, CSF1, GRIN2B, INO80, FANCB, CLNS1A, SMAD5, CELF4, TCERG1, ABCG1, DCUN1D4, SLC40A1, MED1, CDC14B, IL33, GPRC5C, ROR2, ZNF521, BANK1, CSD, E1, LMX1A, IL10, ACTR2, SFPQ, RIOK1, PTH, PRKAA2, LARP6, ETVD6, IQGAP1, ZBTB7C, TEAD1, SREBF2, ANP32B, YBX3, NRXN1, MED22, CENPE, LMX1B, TWIST1, ALKAL2, JAK2, ZBTB38, MADD, PATL1, ZNF287, CREBBP, MELTF, TNKS, PCNA, NFKBIA, PRKCB, RFC2, ALX4, RTRAF, BRD4, NEDD9, ITGA6, ASS1, ZBTB49, STOX2, AGO1, MEOX2, ELL2, STAT1, NDFIP2, MAP2K6, MTPN, ABI1, CEMIP, IMPACT, CCBE1, PARK7, MAPK8, OAZ2, MED12L, POU1F1, MTF2, MYOCD, CYFIP2, ARID3B, MEF2C, RXRA, WNT7A, MAP3K5, NDFIP1, MAP3K4, ZNF112, RAD51AP1, RAB38, DBF4B, FBXW8, SDCBP, WWOX, PASK, NCK1, SCAF8, CDCA8, PPP2R3A, MLLT10, RNF8, EPHA4, MECOM, DNMT3L, NTRK2, CREB5, PTK2, CDH5, ASCL3, UBE3A, SEMA4D, ZBTB20, RUNX1, POMT2, ZNF845, NOS1AP, CCDC88A, CHCHD2, TNFSF11, FYN, KDM5A, PPM1F, HDAC2, SLF1, TBX15, SH2D3C, DOCK3, NCS1, MAPK9, PABPC1, TET1, ARNT2, HECW2, ITGA8, GRM5, RPS6KA5, PID1, NRP1, ITGA1, ZNF615, KLF12, RC3H1, NRIP1, ZNF850, SUPT3H, T |

|            |                                  |                         |                                                                                                                                                                                                                                                                                                                                                                                                                                                                                                                                                                                                                                                                                                                                                                                                                                                                                                                                                                                                                                                                                                                                                                                                                                                                                                                                                                                                                                                                                                                                                                                                                                                                                                                                                                                                                                                                                                                                                                                                                                                                                                                                                                                                                                                                                                                                                                                                                                                                                                                                                                                                                                                        |
|------------|----------------------------------|-------------------------|--------------------------------------------------------------------------------------------------------------------------------------------------------------------------------------------------------------------------------------------------------------------------------------------------------------------------------------------------------------------------------------------------------------------------------------------------------------------------------------------------------------------------------------------------------------------------------------------------------------------------------------------------------------------------------------------------------------------------------------------------------------------------------------------------------------------------------------------------------------------------------------------------------------------------------------------------------------------------------------------------------------------------------------------------------------------------------------------------------------------------------------------------------------------------------------------------------------------------------------------------------------------------------------------------------------------------------------------------------------------------------------------------------------------------------------------------------------------------------------------------------------------------------------------------------------------------------------------------------------------------------------------------------------------------------------------------------------------------------------------------------------------------------------------------------------------------------------------------------------------------------------------------------------------------------------------------------------------------------------------------------------------------------------------------------------------------------------------------------------------------------------------------------------------------------------------------------------------------------------------------------------------------------------------------------------------------------------------------------------------------------------------------------------------------------------------------------------------------------------------------------------------------------------------------------------------------------------------------------------------------------------------------------|
|            |                                  |                         | <p>UT4, PRIM2, FBLN1, PRDM15, MITF, BCL2L13, CD38, EYA4, MET, S PPL3, CDH13, MAGI2, PRDM11, MLIP, MYB, DHX29, BMP7, RNF217, BPTF, NUDT21, KMT2C, PDGFC, RFX2, EYA1, CNOT7, ERBB4, GSAP, ROBO1, SAMD4A, PBX1, NPAS3, PRKCQ, ANTXR1, MGMT, SHLD2, NOS1, PRR16, EFNA5, TCF12, ARHGEF11, NSD1, ESR1, PRLR, AGO3, PIK3R3, EYA2, CHFR, ZNF721, NRF1, ROCK2, RORA, DMRT1, HERPUD1, NCOA6, COL4A3, BARD1, STK3, ZNF423, HNRNPU, RAB3GAP2, IGF1R, PRKAG2, GLI2, THRB, AKAP13</p>                                                                                                                                                                                                                                                                                                                                                                                                                                                                                                                                                                                                                                                                                                                                                                                                                                                                                                                                                                                                                                                                                                                                                                                                                                                                                                                                                                                                                                                                                                                                                                                                                                                                                                                                                                                                                                                                                                                                                                                                                                                                                                                                                                                |
| GO:0032879 | regulation of localization       | 0.00002021745080884265  | <p>CACNA2D3, WWC1, ABCA13, KCNH5, FTO, MX2, CLTCL1, DPP10, ITPR2, RIPOR2, PDE4D, RDX, STXBP1, RALA, BCL2, KCNMA1, RIMS1, PIK3C3, RIMS2, MCTP1, ANO6, CACNG2, GPC6, APC, CRKL, SETD2, PTPRJ, EGFR, RFX3, ANGPT1, DOCK2, NEDD4, BTBD9, DNAJC13, DGKI, C12ORF4, TTC39B, NUP214, PRKD1, CHRM3, FGF12, TMEM38B, UBE2L3, GRM7, THADA, NEDD4L, ADAM10, APP, CACNA1C, CACNB2, DCLK1, TMC1, SYT1, VCL, ARHGAP44, NTF3, NDUFAF2, CD2AP, PARN, SLC8A1, ABCG8, KCNE4, AKAP6, HOMER2, RAB8B, KCNK10, RAP1GDS1, CLIC6, DNM3, SCP2, PRKCZ, GRB10, RYR3, RAB27B, CNST, HE CW1, ABCA5, YAP1, MAPK1, CADPS2, KCNJ1, RABGAP1L, SYT10, ANK FY1, SYCP1, SLC16A1, SPIDR, CORO2B, TM7SF3, STON2, NF2, LRCR38, CORIN, CTNNA1, AKAP9, KLF15, RASGRF2, PPARA, KCNS3, SYNJ1, PLA2R1, DAPK1, SCN2A, DYSF, ANK2, BCAS3, RYR2, NKAIN3, USP8, TBC1D5, BLK, ABL1, SLC1A1, PRKAA1, KCNH1, ETPR1, RAP1A, NKAIN2, GPC5, FGF10, LATS2, NRG1, GSG1L, RASGRF1, SH3GL3, PRKCE, SLMAP, WNK2, EGF, ABCC9, STXBP6, ATP8A2, SCG5, PTPN2, TRIM5, HTR2C, RIC3, ARHGEF7, ALG10B, ATP8A1, OPRM1, HTR2A, CYP4A11, STAC, ABHD17C, CNIH3, APBA2, KCND2, NOS2, MDFIC, MYLK2, ANK3, LYPLA1, HIP1, PRR5L, RUFY2, PACSIN2, CNTN1, SNX3, CACNA1I, KCNJ15, WDPCP, BMP2, ATP9A, SCN11A, MSR1, VRK1, GNAI1, TBC1D4, MYRIP, RIN3, BMP2K, NETO2, RELN, HMGB1, MYOM1, UNC13B, TTC21B, PLS1, SLAMF1, KCNH8, GLI3, CNKSR3, MCTP2, MAP2, CFTR, NEU3, SLC30A10, SELENON, NMD3, PRKN, MTMR2, GRIN2A, JPH1, PRKCH, FRMD4A, KCNQ3, SHISA9, SCN10A, USP7, KCND3, MESD, RALB, ROCK1, LYN, SUMO3, CRACR2A, INSR, HECTD1, TRIM58, PLPP4, NSD2, SH3GLB1, CARD10, ENPP1, UTRN, KCNC1, GHRH, BCL2L1, HCN1, GRIN2B, ABCG1, KCNK5, MICALL2, PCNT, PTH, PRKAA2, NDC80, VSTM2A, PLA2G4A, SREBF2, ANP32B, AIMP1, NRXN1, SNAP91, TWIST1, JAK2, CELSR2, SIAH3, UFL1, NFKBIA, PRKCB, ABCC8, CACNA1E, NEDD9, ATP2B1, MTCL1, SAR1A, CIDEA, EXOC1, SLC6A1, NDFIP2, MAP2K6, KCNJ18, CEMIP, PARK7, MAPK8, OAZ2, UBE2J2, ADCYAP1R1, TM9SF4, RAPGEF4, CEP120, EFHB, MEF2C, RXRA, WNT7A, NDFIP1, SDCBP, PASK, FGR, CDCA8, C2, IL1RAPL1, NUMB, OCLN, SHISA6, MARK4, CLDN18, DIAPH1, CYFIP1, ICA1, NOS1AP, CCDC88A, NSUN2, BICD1, TNFSF11, FYN, PPM1F, SCN8A, NALCN, APELA, HECW2, CDH2, FBXL20, GPR137B, GRM5, TBC1D1, PID1, NRP1, ATPSCKMT, BCR, NRXN3, KCNJ6, B9D1, BMPER, DPP6, MACROH2A1, EPHB2, TSPAN13, CD38, CDH13, STXBP4, CACNG3, ATG5, MAGI2, VMP1, KALRN, SLC1A2, MFHAS1, ASTN2, GAVPD1, WDR41, PLIN2, ABL2, KCNIP4, ERBB4, TRDN, NLGN1, NOS1, ASIC2, EFN A5, RAB27A, KCNQ5, CACNA2D1, HTT, CAMK1D, HLA-F, FER, CCR2, OSBPL6, ROCK2, IL16, CDCA5, CATSPER2, RAB31, RGS7, CLDN10, BARD1, HNRNPU, CEP72, CADPS, KCNAB1, PRKAG2, DNMLL</p> |
| GO:0042391 | regulation of membrane potential | 0.000020630266425093342 | <p>MTOR, KCNH5, PIEZO2, BCL2, KCNMA1, CHRNA7, RIMS1, GABRB3, RIMS2, CACNG2, CTNNA3, NEDD4, GRIK3, GABRB1, DGKI, GRIA1, SLC8A3, FGF12, GABRA6, TAFA4, NEDD4L, APP, ABCB5, CACNA1C, CACNB2, GABRG2, SLC8A1, KCNE4, AKAP6, KCNK10, TRPC5, PRKCZ, GRIK4, AKAP9, GRM1, GABRG1, SLC24A4, TMEM108, SCN2A, ANK2, RYR2, CXADR, ABL1, KCNH1, GRID2, SLMAP, P2RX6, OPRM1, KCND2, ANK3, CACNA1I, SCN11A, RELN, GNAQ, UNC13B, KCNH8, GABRR2, GRIK2, CFTR, PRKN, MTMR2, GRIN2A, KCNQ3, SLC4A4, SCN10A, KCND3, PPA2, GRID1, BID, GABRG3, IGSF11, KCNC1, BCL2L1, HCN1, GRIN2B, CELF4, KCNK5, NRXN1, PARK7, MEF2C, WNT7A, GABRA5, NTRK2, GRIK1, NOS1AP, SCN8A, NALCN, SLC39A8, GRM5, PID1, GNA14, GABRA2, TMEM25, TRDN, NLGN1, ASIC2, CACNA2D1</p>                                                                                                                                                                                                                                                                                                                                                                                                                                                                                                                                                                                                                                                                                                                                                                                                                                                                                                                                                                                                                                                                                                                                                                                                                                                                                                                                                                                                                                                                                                                                                                                                                                                                                                                                                                                                                                                                                                                      |
| GO:00      | positive                         | 0.00002                 | <p>BCAR3, MTOR, NSG1, WWC1, ULK2, FTO, MGA, PLCB1, ZFPM2, DLC1, TNRC6B, BCL2, PRDM16, CHRNA7, EPC2, SPIRE1, ZEB1, AKR1C3, R</p>                                                                                                                                                                                                                                                                                                                                                                                                                                                                                                                                                                                                                                                                                                                                                                                                                                                                                                                                                                                                                                                                                                                                                                                                                                                                                                                                                                                                                                                                                                                                                                                                                                                                                                                                                                                                                                                                                                                                                                                                                                                                                                                                                                                                                                                                                                                                                                                                                                                                                                                        |

|            |                                          |                                     |                                                                                                                                                                                                                                                                                                                                                                                                                                                                                                                                                                                                                                                                                                                                                                                                                                                                                                                                                                                                                                                                                                                                                                                                                                                                                                                                                                                                                                                                                                                                                                                                                                                                                                                                                                                                                                                                                                                                                                                                                                                                                                                                                                                                                                                                                                                                                                                                                                                                                                                                                                                                                                                                                                                                                                                                                                                                                                                                                                                                                                                                                                                                                                                                                                                                                                                                                                                                                                                                                                    |
|------------|------------------------------------------|-------------------------------------|----------------------------------------------------------------------------------------------------------------------------------------------------------------------------------------------------------------------------------------------------------------------------------------------------------------------------------------------------------------------------------------------------------------------------------------------------------------------------------------------------------------------------------------------------------------------------------------------------------------------------------------------------------------------------------------------------------------------------------------------------------------------------------------------------------------------------------------------------------------------------------------------------------------------------------------------------------------------------------------------------------------------------------------------------------------------------------------------------------------------------------------------------------------------------------------------------------------------------------------------------------------------------------------------------------------------------------------------------------------------------------------------------------------------------------------------------------------------------------------------------------------------------------------------------------------------------------------------------------------------------------------------------------------------------------------------------------------------------------------------------------------------------------------------------------------------------------------------------------------------------------------------------------------------------------------------------------------------------------------------------------------------------------------------------------------------------------------------------------------------------------------------------------------------------------------------------------------------------------------------------------------------------------------------------------------------------------------------------------------------------------------------------------------------------------------------------------------------------------------------------------------------------------------------------------------------------------------------------------------------------------------------------------------------------------------------------------------------------------------------------------------------------------------------------------------------------------------------------------------------------------------------------------------------------------------------------------------------------------------------------------------------------------------------------------------------------------------------------------------------------------------------------------------------------------------------------------------------------------------------------------------------------------------------------------------------------------------------------------------------------------------------------------------------------------------------------------------------------------------------------|
| 31325      | regulation of cellular metabolic process | 3673876<br>8140760<br>56            | <p>ARB, ALK, AUTS2, FOXJ2, BABAM2, GLIS3, FANK1, MLLT3, DSCAM, TCF4, CRKL, ERG, TNFK, PTPRJ, NEK4, EGFR, RFX3, ANGPT1, CDK12, BACH1, NEK7, ZNF407, MAML2, BCL11A, FLI1, NTRK3, FLT1, RFC3, TASP1, THRAP3, PRKD1, PAK1, EPHA7, NCOA7, RAPGEF2, PELI2, RUNX2, TAOK3, ONECUT1, UBE2L3, LDB2, SMYD3, RPTOR, GHR, SBP3, ATF7IP, APBB2, APP, KDM1B, ZNF600, NTF3, AURKA, PARN, ST18, PYGO1, SSBP2, ANKRD31, DUX4, ABCD2, BMPR1B, FMN2, ZNF717, ARNT, PAK3, RANBP2, LARP1, TRPC5, NBN, PRKCZ, GRB10, TAF15, PHF19, MRTFA, TAF4B, EBF2, YAP1, NFIA, MAPK1, KMT2E, PCGF5, PDGFD, NRG3, GFRA1, NIPBL, SPIDR, GABPA, CHD6, KANSL1, LIMCH1, ATF6, VPS13D, HIVEP1, MOB3B, AKAP9, KLF15, PPARA, MEIS2, SNX30, NFIB, MRTFB, NR5A2, FOXJ3, TRERF1, EIF3D, DAPK1, AGO2, JARID2, GATAD2B, IL34, BCAS3, ZNF606, SMARCA4, MAPKAP1, TNRC6C, PIAS1, ATRX, ABL1, HDAC4, SLC1A1, PRKAA1, MRP S27, APLF, NFAT5, RAP1A, GLIS1, TOX3, CAMK4, FGF10, ZC3HAV1, NRG1, INO80D, AP3B1, ZNF438, ABCB7, ZBTB16, MUSK, PRKCE, FOXK2, SLCO3A1, MED15, ESRRG, CD44, EGF, PRRC1, RPS6KA3, PTPN2, TRIM5, RFC1, HTR2C, ALG10B, AMBRA1, KDM7A, OPRM1, HTR2A, DAZL, GTF2F2, TAF3, RPRD1B, MARK2, EBF3, ZNF33B, PUM1, MSH2, EPHA6, SLC2A13, KNDC1, CLSPN, NOS2, BICRAL, MNAT1, RBBP8, MDFIC, HMGA2, CCND3, BCL11B, ECE1, CREM, TGFA, PRR5L, CNTN1, BRCA2, DISC1, BLM, BMP2, RC3H2, GFI1B, TMEM161A, ASXL3, RELN, HMGB1, FGF9, NFATC2, ZNF462, ETS2, DSTYK, UIMC1, ATF1, SMARCA2, ETS1, GLI3, CGAS, SMARCC1, SMOC2, VENTX, PRDM10, RERE, NEK10, MOB1B, ATF2, HIVEP3, PSIP1, RGM, KITLG, CAMTA1, GTF2I, RORB, TADA2A, DAB1, MED27, ZNF208, RB1CC1, NMD3, PRKN, TBX20, DPF3, ARID5B, IL6R, ALS2, NLRC5, TFDP1, CNOT6L, TFOX, SLC4A4, ZFP90, COPS8, USP7, VAV3, PLAGL1, SOX30, KIR2DL4, RALB, NPAS2, ROCK1, LYN, ZNF780B, DTX1, OVOL2, ZFHX3, BANP, SUPT16H, ARID1B, HOXC13, RNF152, BAZ1A, CASZ1, INSR, YTHDF3, HECTD1, PBX3, SUMO2, ZNF292, ASH1L, HOXC4, RXRG, SP3, ERN2, MBTPS2, ELF2, NSD2, FYCO1, SH3GLB1, CARD10, CTIF, RASGRP1, SNX9, BMP5, CSF1, INO80, FANCB, CLNS1A, SMAD5, CELF4, TCERG1, ABCG1, SLC40A1, LPGAT1, MED1, IL33, GPRC5C, ROR2, ZNF521, BANK1, CSDE1, LMX1A, IL10, ACTR2, SFPQ, RIOK1, PTH, PRKAA2, LARP6, ETV6, IQGAP1, ZBTB7C, TEAD1, SREBF2, YBX3, NRXN1, PCID2, CENPE, LMX1B, TWIST1, ALKAL2, JAK2, ZBTB38, MADD, PATL1, ZNF287, CREBBP, TNKS, PCNA, UFL1, NFKBIA, PRKCB, RFC2, ALX4, RTRAF, BRD4, NEDD9, ITGA6, ASS1, ZBTB49, STOX2, AGO1, MEOX2, ELL2, STAT1, MAP2K6, ABI1, CEMIP, IMPACT, PARK7, MED12L, POU1F1, ADCYAP1R1, MTF2, MYOCD, ARID3B, MEF2C, ADGRB1, RXRA, WNT7A, MAP3K5, MAP3K4, ZNF112, RAD51AP1, RAB38, DBF4B, FBXW8, SDCBP, WWOX, PASK, NCK1, SCAF8, FGR, CDCA8, MLT10, IFNAR1, RNF8, EPHA4, MECOM, DNMT3L, NTRK2, CREB5, PTK2, CDH5, ASCL3, UBE3A, SEMA4D, ZBTB20, RUNX1, POMT2, ZNF845, NOS1AP, CCDC88A, CHCHD2, TNFSF11, FYN, KDM5A, HDAC2, SLF1, TBX15, SH2D3C, DOCK3, NCS1, MAPK9, PABPC1, ROR1, TET1, ARNT2, ITGA8, EPHB1, GRM5, RPS6KA5, PID1, NRP1, ITGA1, ZNF615, KLF12, RC3H1, NRIP1, POR, ZNF850, SUPT3H, TUT4, PRIM2, PRDM15, MITF, EPHB2, CD38, EYA4, MET, SPPL3, CDH13, MAGI2, PRDM11, MLIP, MYB, DHX29, BMP7, RNF217, BPTF, BTBD10, NUDT21, KMT2C, ADGRF5, PDGFC, RFX2, EYA1, CNOT7, ERBB4, GSAR, ROBO1, SAMD4A, PBX1, NPAS3, PRKCQ, MGMT, SHLD2, NOS1, PRR16, EFNA5, TCF12, ARHGEF11, RAB27A, NSD1, ESR1, PRLR, AGO3, HTT, PIK3R3, EYA2, CHFR, ZNF721, NRF1, HRH1, ROCK2, RORA, DMRT1, HERPUD1, NCOA6, STK3, ZNF423, HNRNPU, RAB3GAP2, IGF1R, PRKAG2, GLI2, THRB, AKAP13, MORC3</p> |
| GO:0098655 | cation transmembrane transport           | 0.00002<br>4491182<br>7656982<br>63 | <p>UNC80, CACNA2D3, SLC17A1, SLC24A2, KCNH5, MICU2, PIEZO2, DPP10, ITPR2, PDE4D, BCL2, KCNMA1, CHRNA7, ANO6, CACNG2, SLC4A10, NEDD4, ATP2B2, TUSC3, SLC39A12, SLC8A3, PRKD1, FGF12, TMEM38B, SLC24A3, THADA, NEDD4L, TRPM1, SLC39A11, APP, SLC7A2, CACNA1C, CACNB2, TMC1, SLC8A1, KCNE4, AKAP6, KCNK10, TRPC5, RYR3, HECW1, KCNJ1, TRPC7, NIPAL2, MICU1, LRR38, AKAP9, RASGRF2, KCNS3, DAPK1, SLC24A4, SCN2A, ANK2, RYR2, SLC9C1, SLC36A1, ABL1, SLC1A1, SLC12A8, KCNH1, GSG1L, RASGRF1, ABCB7, PRKCE, SLMAP, WNK2, ABCC9, P2RX6, HTR2C, ALG10B, AT</p>                                                                                                                                                                                                                                                                                                                                                                                                                                                                                                                                                                                                                                                                                                                                                                                                                                                                                                                                                                                                                                                                                                                                                                                                                                                                                                                                                                                                                                                                                                                                                                                                                                                                                                                                                                                                                                                                                                                                                                                                                                                                                                                                                                                                                                                                                                                                                                                                                                                                                                                                                                                                                                                                                                                                                                                                                                                                                                                                            |

|            |                                           |                         |                                                                                                                                                                                                                                                                                                                                                                                                                                                                                                                                                                                                                                                                                                                                                                                                                                                                                                                                                                                                                                                                                                                                                                                                                                                                                                                                                                                     |
|------------|-------------------------------------------|-------------------------|-------------------------------------------------------------------------------------------------------------------------------------------------------------------------------------------------------------------------------------------------------------------------------------------------------------------------------------------------------------------------------------------------------------------------------------------------------------------------------------------------------------------------------------------------------------------------------------------------------------------------------------------------------------------------------------------------------------------------------------------------------------------------------------------------------------------------------------------------------------------------------------------------------------------------------------------------------------------------------------------------------------------------------------------------------------------------------------------------------------------------------------------------------------------------------------------------------------------------------------------------------------------------------------------------------------------------------------------------------------------------------------|
|            |                                           |                         | <p>P8A1,OPRM1,HTR2A,CNNM4,STAC,CNIH3,MAIP1,KCND2,AFG3L2,ANK3,NIPA2,TMEM163,ATP6V1E1,CACNA1I,KCNJ15,SCN11A,NETO2,RELN,SLC39A6,KCNH8,SLC9A4,CNKSR3,SLC30A10,SELENON,GRIN2A,JPH1,TRPM6,SLC12A1,KCNQ3,SHISA9,SLC4A4,SCN10A,KCND3,KCNN3,LYN,SLC15A2,CRACR2A,CUL5,COX5A,ZDHHC17,UTRN,KCNC1,HCN1,GRIN2B,KCNK5,SLC40A1,COX7A2L,NRXN1,TWIST1,TRPV5,ABCC8,CACNA1E,ATP2B1,OTOP1,SLC6A1,SHROOM2,SLC6A11,KCNJ18,CEMIP,CBLIF,PARK7,ADCYAP1R1,ATP13A3,MEF2C,ATP6V1C2,ATP6V1B2,SHISA6,TRPM7,DIAPH1,SCARA5,NOS1AP,SLC9A5,SLC5A1,ANO10,FYN,SCN8A,TMEM63C,NCS1,ATP5PF,NALCN,TRPM3,SLC39A8,SLC16A9,HECW2,ATPSCKMT,KCNJ6,DPP6,EPHB2,TSPAN13,ATP6V0D2,CACNG3,ATG5,VMP1,SLC1A2,KCNIP4,TRDN,NLGN1,NOS1,SLC6A3,ASIC2,KCNQ5,CACNA2D1,HTT,SLC25A18,CCR2,CATSPER2,RGS7,KCNAB1</p>                                                                                                                                                                                                                                                                                                                                                                                                                                                                                                                                                                                                                               |
| GO:0043085 | positive regulation of catalytic activity | 0.00002466489453047691  | <p>BCAR3,MTOR,GARNL3,MYO9A,DLC1,BCL2,CHRNA7,ALK,EGLN3,CRKL,ARHGAP24,DOCK10,EGFR,DENND1A,ANGPT1,NEK7,NTRK3,RXFP1,FLT1,RFC3,PRKD1,PAK1,EPHA7,RALGPS1,RAPGEF2,T AOK3,UBE2L3,RPTOR,GHR,RALGAPA1,RAPGEF5,APP,CACNA1C,DOCK8,MAPRE2,NTF3,ACER2,PARN,ST18,MAP4K4,BMPR1B,RANBP2,RAP1GDS1,NBN,IFT57,PRKCZ,MSH6,MAPK1,RABGAP1L,PDGFD,NRG3,TBC1D22A,CHN1,MOB3B,RASGRF2,RGL1,TIAM1,ARAP2,DAPK1,TBC1D9,IL34,BCAS3,WNT9B,CLPX,TBC1D5,ABL1,SLC1A1,RAP1A,NRG1,RASGRF1,MUSK,ASAP2,CD44,EGF,PRRC1,ARHGEF7,AMBRA1,HTR2A,MARK2,MSH2,EPHA6,CLSPN,NOS2,MNAT1,HMGA2,CCND3,MBP,TGFA,HIP1,VAV1,IQSEC1,BMP2,EVI5,RALGAPA2,SGSM1,TBC1D4,RELN,ARHGAP42,HMGB1,GNAQ,DSTYK,RAP1GAP,SRGAP2,NEK10,MOB1B,TBC1D13,KITLG,DAB1,NGEF,GRIN2A,IL6R,ALS2,DOCK9,COPS8,VAV3,RALB,ROCK1,LYN,INSR,XRCC4,BID,ERN2,CARD10,RALGPS2,RASGRP1,SNX9,CSF1,GRIN2B,DCUN1D4,PSAP,CDC14B,GPRC5C,ROR2,RASGEF1C,PTH,IQGAP1,ANP32B,NRXN1,CENPE,NET1,SIPA1L2,ALKAL2,JAK2,MADD,TNKS,PCNA,ZC3H15,RFC2,NEDD9,ITGA6,PDP2,MAP2K6,ABI1,CEMIP,PARK7,MAPK8,ADCYAP1R1,RAPGEF4,CYFIP2,MEF2C,MAP3K5,MAP3K4,DBF4B,FGR,EPHA4,NTRK2,PTK2,SEMA4D,RASGEF1B,ASAP1,NOS1AP,CCDC88A,GPR55,TNFSF11,FYN,PPM1F,DOCK3,NCS1,ROR1,EPHB1,GRM5,TBC1D1,ATPSCKMT,ITGA1,POR,BCR,RGS6,PRIM2,FBLN1,EPHB2,BCL2L13,MET,MAGI2,KALRN,GNAS,TIAM2,PDGFC,WDR41,ABL2,ERBB4,ROBO1,PRKCQ,ANTXR1,SIPA1L3,NOS1,EFNA5,ESR1,PRLR,ROCK2,RGS8,COL4A3,RGS7,STK3,RSU1,HNRNPU,IGF1R,PRKAG2,AKAP13</p> |
| GO:000165  | MAPK cascade                              | 0.000026058251205588595 | <p>NOTCH2,BCAR3,WWC1,NLK,KSR1,PLCB1,CHRNA7,SPRED1,ALK,PJA2,MAP3K9,CRKL,TNIPK,PTPRJ,EGFR,ANGPT1,NCOR1,NTRK3,FLT1,MAPKBP1,EDAR,PAK1,EPHA7,RAPGEF2,PELI2,FGF12,T AOK3,GHR,APP,NTF3,PTPRR,MAP4K4,PAK3,ITPKB,RAP1GDS1,PRKCZ,GRB10,DUSP22,PPM1L,MAPK1,PDGFD,STK38,HRH4,PAFAH1B1,NF2,GRM1,PAK5,IL34,DUSP16,ABL1,RAP1A,FGF10,NRG1,DENND2B,ZNF675,PRKCE,WNK2,CD44,EGF,SPRED2,PTPN2,TRIM5,HTR2C,OPRM1,HTR2A,RELL1,HIPK3,MDFIC,MBP,PLCE1,TGFA,NRK,SEMA3A,MAGI3,BMP2,RANBP9,HMGB1,TRAF3,DSTYK,SLAMF1,CNKSR3,GAREM1,NEK10,ATF2,CYLD,MAPK8IP1,KITLG,MAP4K3,SLC30A10,RB1CC1,PRKN,MAPK10,IL6R,ROCK1,LYN,CRACR2A,INSR,ASH1L,ERN2,ZDHHC17,JCAD,RASGRP1,NDRG2,ROR2,KL,BANK1,IQGAP1,NRXN1,ALKAL2,JAK2,MADD,HCTR1,MAP2K6,MAPK8,MEF2C,WNT7A,MAP3K5,MAP3K4,SDCBP,EPHA4,MECOM,NTRK2,ANKRD6,AIP,NENF,GPR55,TNFSF11,SH2D3C,DOK5,MAPK9,APELA,CDH2,PHLPP1,EPHB1,GRM5,NRP1,PRKCA,ITGA1,FBLN1,BMPER,PRDM15,EPHB2,PRDM11,MFHAS1,BMP7,ZMYND11,PDGFC,ERBB4,ROBO1,ROCK2,PPP1CB,STK3,IGF1R,AKAP13</p>                                                                                                                                                                                                                                                                                                                                                                                                                  |
| GO:0051963 | regulation of synapse assembly            | 0.000026393394584697964 | <p>PTPRD,IL1RAPL2,ROBO2,NEGR1,GPC6,NTRK3,EPHA7,ADGRB3,APP,STAU2,LRFN5,GRID2,MUSK,LINGO2,PDLIM5,FARF1,NTN1,COLQ,CLSTN2,NRXN1,MEF2C,ADGRB1,WNT7A,NECTIN1,NTRK2,IL1RAPL1,SEMA4D,ADGRL2,EPHB1,EPHB2,FLRT2,DLG5,SYNDIG1,NLGN1,ASIC2,EFNA5</p>                                                                                                                                                                                                                                                                                                                                                                                                                                                                                                                                                                                                                                                                                                                                                                                                                                                                                                                                                                                                                                                                                                                                            |

|            |                                                                         |                         |                                                                                                                                                                                                                                                                                                                                                                                                                                                                                                                                                                                                                                                                                                                                                                                                                                                      |
|------------|-------------------------------------------------------------------------|-------------------------|------------------------------------------------------------------------------------------------------------------------------------------------------------------------------------------------------------------------------------------------------------------------------------------------------------------------------------------------------------------------------------------------------------------------------------------------------------------------------------------------------------------------------------------------------------------------------------------------------------------------------------------------------------------------------------------------------------------------------------------------------------------------------------------------------------------------------------------------------|
| GO:0048588 | developmental cell growth                                               | 0.000029101836895050213 | ULK2,RIMS1,RIMS2,AUTS2,DSCAM,MACF1,BCL11A,CDH4,EPHA7,NEDD4L,APP,DCLK1,SEMA5A,SYT1,VCL,AURKA,AKAP6,DIP2B,TRPC5,PRKCZ,COBL,ALCAM,PAFAH1B1,PPARA,SEMA3C,TMEM108,SEMA6D,TNR,ABL1,EXT1,SEMA3E,PDLIM5,DISC1,SEMA3A,SEMA3D,SLC23A2,NIN,DRAXIN,MAP2,DCC,PRKN,ITSN2,NTN1,CTDP1,TNN,IQGAP1,IMPACT,ITGA4,CYFIP2,CYFIP1,SEMA4D,SORBS2,SPAG6,NRP1,SLIT2,EFNA5,SLIT3,SEMA4B,FSTL4,AKAP13                                                                                                                                                                                                                                                                                                                                                                                                                                                                           |
| GO:1905114 | cell surface receptor signaling pathway involved in cell-cell signaling | 0.00003132894408220767  | NLK,CHRNA7,RIMS1,RIMS2,MLLT3,GPC6,APC,TNFK,EGFR,MACF1,RNF220,DKK2,DGKI,INVS,SLC8A3,PRICKLE2,APP,SEMA5A,PYGO1,KANK1,PRKCZ,GRB10,HECW1,YAP1,ZNRF3,KLF15,TIAM1,PCDH11Y,TMEM108,ALPK2,CPE,WNT9B,SMARCA4,USP8,ABL1,PRKAA1,GPC5,FGF10,GRID2,LATS2,ASPM,NXN,WNK2,PTPRO,EGF,P2RX6,EXT1,LIMD1,CTNND2,OPRM1,KREMEN1,MARK2,MDFIC,NPHP4,SNX3,DISC1,STRN,BMP2,RELN,GNAQ,FGF9,UNC13B,TTC21B,DRAXIN,GLI3,GRIK2,CYLD,KPNA1,PRKN,MTMR2,GRIN2A,MESD,SOX30,ZBTB33,SNAI2,SLIT2,TRABD2B,IGSF11,NDRG2,CSNK2A1,GRIN2B,CELF4,TNN,ROR2,SOSTDC1,PRKAA2,RPS12,NRXN1,CELSR2,TNKS,GID8,MEF2C,WNT7A,ATP6V1C2,WWOX,PPP2R3A,WNT2B,SHISA6,ANKRD6,WNT5B,AMFR,CCDC88A,RBMS3,ROR1,CDH2,RNF138,MCC,PRDM15,MITF,CSNK1G1,CDK14,MAGI2,TMEM25,NLGN1,STK3,ZNF423,APCDD1,GLI2                                                                                                                   |
| GO:0051960 | regulation of nervous system development                                | 0.000033021423611758885 | MTOR,PTPRD,ULK2,TENM4,ROBO2,DSCAM,MACF1,BCL11A,CDH4,NTRK3,EPHA7,SPEN,RAPGEF2,LRP2,ADGRB3,STAU2,SEMA5A,FIG4,PAK3,DIP2B,TRPC5,YAP1,BRINP1,PAFAH1B1,NF2,CTNNA1,PRTG,SYNJ1,TIAM1,SEMA3C,IL34,SEMA6D,PARD3,TNR,GRID2,ASPM,PLXNA2,OPRM1,SEMA3E,LINGO2,MBP,DISC1,SEMA3A,BMP2,SEMA3D,RELN,NIN,DRAXIN,GLI3,MAP2,DCC,DAB1,MTMR2,PRKCH,TG,LYN,NTN1,DPYSL5,RXRG,IL33,ACTR2,CLSTN2,MAP6,NRXN1,UFL1,ABCC8,ADGRB1,WNT7A,WASF3,FBXW8,EPHA4,NTRK2,IL1RAPL1,NUMB,FBXO31,CYFIP1,SEMA4D,JAM2,ADGRL2,HDAC2,EPHB1,GRM5,NRP1,FAIM,CHODL,CUX1,EPHB2,FLRT2,KALRN,TIAM2,BMP7,DLG5,SLIT2,SYNDIG1,ROBO1,NLGN1,ASIC2,EFNA5,SEMA4B,HOKK3,FSTL4                                                                                                                                                                                                                                     |
| GO:0001654 | eye development                                                         | 0.00003321941201379576  | NOTCH2,BCAR3,SMOC1,SCAPER,RP1,BCL2,ALDH1A2,FBN1,TENM3,ZEB1,RARB,SPRED1,DSCAM,EGFR,CRB1,ATP2B2,FLT1,ABC B5,CACNA1C,DCLK1,STAU2,BMPR1B,NIPBL,FAT3,ATF6,EFEMP1,NF2,MEIS2,WNT9B,SMARCA4,SLC1A1,TTL5,FGF10,FBN2,SPRED2,NHS,ATP8A2,BCL11B,NPHP4,WPCP,PDE6C,FGF9,TDRD7,CPAMD8,MDM1,GLI3,MEGF11,BBS4,LAMC3,COL5A1,RORB,PD E6A,PBX3,SP3,DZANK1,HCN1,CELF4,VSTM4,MED1,FAT1,HIPK1,TWIST1,VXSI,USH1C,ATP2B1,SHROOM2,ADAMTS18,WNT7A,N ECTIN1,PPP2R3A,NTRK2,WNT2B,WNT5B,UNC45B,HDAC2,XRN2, EPHB1,RP1L1,NRP1,SDK1,B9D1,MITF,EPHB2,LAMA1,BMP7,PB X1,MYH15,SIPA1L3,SLC6A3,RPGRI1,PRDM1,THRB                                                                                                                                                                                                                                                                           |
| GO:0000226 | microtubule cytoskeleton organization                                   | 0.000039644628519758966 | LRRC49,RIPOR2,RP1,ODAD2,SPIRE1,CNTLN,SDCCAG8,SPAG16,CEP192,MAP4,APC,SETD2,NEK7,NCOR1,ARMC2,SLC39A12,PA K1,DEUP1,LRGUK,KIF4A,TBCD,DCLK1,MAPRE2,AURKA,SRGAP2 C,CCSER2,FMN2,TTL7,PRKCZ,MCPH1,SENPA6,SLC16A1,PAFAH 1B1,AKAP9,PARD3B,NAV3,STAG2,BCAS3,SYNE2,BBS2,PARD3, DST,ATRX,ABL1,PRKAA1,TTL5,DNAH5,FGF10,CLIP1,ASPM,USP33,PEX14,ATXN3,ARHGEF7,MARK2,TMEM67,C10ORF90,ANKF N1,BCRA2,DISC1,GNAI1,RANBP9,DNAL1,TUBGCP3,RTTN,MDM1,SRGAP2,NIN,HAUS6,DNAH8,KIF15,MAP2,DAW1,GOLGA8B,CYL D,BBS4,KIAA0753,CEP44,RACGAP1,MAP7,CFAP74,ROCK1,KIF 11,NEK6,PDE4DIP,HDGFL3,INO80,CDC14B,PCNT,PRKAA2,SKA 1,NDC80,MAP6,TACC2,KIFC1,CENPE,TUBB6,TNKS,SGO1,MTCL 1,EML1,CEP120,DRC7,CDCA8,INTS13,RSPH1,OCLN,MARK4,CD H5,HOATZ,SAXO1,CCDC88A,SPAG6,BICD1,HYDIN,RP1L1,STK3 6,TOGARAM1,MET,DNAH17,TTL11,NUF2,TRDN,EFNA5,GAS2L1,HTT,CFAP44,FER,ROCK2,ATAT1,HOKK3,HNRNPU,CEP72 |
| GO:0150063 | visual system development                                               | 0.0000552675001933495   | NOTCH2,BCAR3,SMOC1,SCAPER,RP1,BCL2,ALDH1A2,FBN1,TEN M3,ZEB1,RARB,SPRED1,DSCAM,EGFR,CRB1,ATP2B2,FLT1,ABC B5,CACNA1C,DCLK1,STAU2,BMPR1B,NIPBL,FAT3,ATF6,EFEMP 1,NF2,MEIS2,WNT9B,SMARCA4,SLC1A1,TTL5,FGF10,FBN2,SPRED2,NHS,ATP8A2,BCL11B,NPHP4,WPCP,PDE6C,FGF9,TDRD                                                                                                                                                                                                                                                                                                                                                                                                                                                                                                                                                                                     |

|            |                                                         |                         |                                                                                                                                                                                                                                                                                                                                                                                                                                                                                                                                                                                                                                                                                                                                                                                                                                                                                                                                                                                                                                                                                                                                                                                                                                                                                                                                                                                                                                                                                                                                                                                                                                                                                                                                                                                                                                                                                                                                                                                                                                                                                                                                                                                                                                                                                                                                                                                                                                                                                                                                                                                                                                                                                                                                                                                                                                                                                                                                                                                                                                |
|------------|---------------------------------------------------------|-------------------------|--------------------------------------------------------------------------------------------------------------------------------------------------------------------------------------------------------------------------------------------------------------------------------------------------------------------------------------------------------------------------------------------------------------------------------------------------------------------------------------------------------------------------------------------------------------------------------------------------------------------------------------------------------------------------------------------------------------------------------------------------------------------------------------------------------------------------------------------------------------------------------------------------------------------------------------------------------------------------------------------------------------------------------------------------------------------------------------------------------------------------------------------------------------------------------------------------------------------------------------------------------------------------------------------------------------------------------------------------------------------------------------------------------------------------------------------------------------------------------------------------------------------------------------------------------------------------------------------------------------------------------------------------------------------------------------------------------------------------------------------------------------------------------------------------------------------------------------------------------------------------------------------------------------------------------------------------------------------------------------------------------------------------------------------------------------------------------------------------------------------------------------------------------------------------------------------------------------------------------------------------------------------------------------------------------------------------------------------------------------------------------------------------------------------------------------------------------------------------------------------------------------------------------------------------------------------------------------------------------------------------------------------------------------------------------------------------------------------------------------------------------------------------------------------------------------------------------------------------------------------------------------------------------------------------------------------------------------------------------------------------------------------------------|
|            |                                                         |                         | 7, CPAMD8, MDM1, GLI3, MEGF11, BBS4, LAMC3, COL5A1, RORB, PDE6A, PBX3, SP3, DZANK1, HCN1, CELF4, VSTM4, MED1, FAT1, HIPK1, TWIST1, VSX1, USH1C, ATP2B1, SHROOM2, ADAMTS18, WNT7A, NECTIN1, PPP2R3A, NTRK2, WNT2B, WNT5B, UNC45B, HDAC2, XRN2, EPHB1, RP1L1, NRP1, SDK1, B9D1, MITF, EPHB2, LAMA1, BMP7, PBX1, MYH15, SIPA1L3, SLC6A3, RRGRI1, PRDM1, THRB                                                                                                                                                                                                                                                                                                                                                                                                                                                                                                                                                                                                                                                                                                                                                                                                                                                                                                                                                                                                                                                                                                                                                                                                                                                                                                                                                                                                                                                                                                                                                                                                                                                                                                                                                                                                                                                                                                                                                                                                                                                                                                                                                                                                                                                                                                                                                                                                                                                                                                                                                                                                                                                                      |
| GO:0048880 | sensory system development                              | 0.00005686595255634882  | NOTCH2, BCAR3, SMOC1, SCAPER, RP1, BCL2, ALDH1A2, FBN1, TENM3, ZEB1, RARB, SPRED1, DSCAM, EGFR, CRB1, ATP2B2, FLT1, ABCB5, CACNA1C, DCLK1, STAU2, BMPR1B, NIPBL, FAT3, ATF6, EFEMP1, NF2, MEIS2, WNT9B, SMARCA4, SLC1A1, TTL5, FGF10, FBN2, SPRED2, NHS, ATP8A2, BCL11B, NPHP4, WPCP, SEMA3A, PDE6C, FGF9, TDRD7, CPAMD8, MDM1, GLI3, MEGF11, BBS4, LAMC3, COL5A1, RORB, PDE6A, PBX3, SP3, DZANK1, HCN1, CELF4, VSTM4, MED1, FAT1, HIPK1, TWIST1, VSX1, USH1C, ATP2B1, SHROOM2, ADAMTS18, WNT7A, NECTIN1, PPP2R3A, NTRK2, WNT2B, WNT5B, UNC45B, HDAC2, XRN2, EPHB1, RP1L1, NRP1, SDK1, B9D1, MITF, EPHB2, LAMA1, BMP7, PBX1, MYH15, SIPA1L3, SLC6A3, RRGRI1, PRDM1, THRB                                                                                                                                                                                                                                                                                                                                                                                                                                                                                                                                                                                                                                                                                                                                                                                                                                                                                                                                                                                                                                                                                                                                                                                                                                                                                                                                                                                                                                                                                                                                                                                                                                                                                                                                                                                                                                                                                                                                                                                                                                                                                                                                                                                                                                                                                                                                                       |
| GO:0010604 | positive regulation of macromolecular metabolic process | 0.000060875283851310745 | BCAR3, MTOR, NSG1, WWC1, PVT1, FTO, MGA, PLCB1, ZFPM2, DLC1, TNRC6B, PDE4D, RDX, BCL2, PRDM16, ALDH1A2, CHRNA7, RIMS1, EPC2, SPIRE1, ZEB1, RARB, ALK, AUTS2, FOXJ2, BABAM2, GLIS3, FANK1, MLLT3, EGLN3, SPON1, APC, HHLA2, TCF4, CRKL, SETD2, ERG, TNK1, PTPRJ, NEK4, EGFR, RFX3, ANGPT1, CDK12, BACH1, NEK7, NCOR1, ZNF407, NEDD4, MAML2, BCL11A, FLI1, NTRK3, C5, FLT1, RFC3, TASP1, THRAP3, EDAR, PRKD1, PAK1, EPHA7, NCOA7, RAPGEF2, PELI2, LRP2, RUNX2, TAOX3, ONECUT1, SLC24A3, UBE2L3, LDB2, SMYD3, RPTOR, GHR, SSBP3, NEDD4L, ATF7IP, IL1R1, APBB2, APP, RPS6KA2, KDM1B, ZNF600, NTF3, ACER2, AURKA, PARN, ST18, PYGO1, SSBP2, ANKRD31, DUX4, PLGRKT, BMPR1B, FMN2, ZNF717, ARNT, PAK3, RFTN1, DIP2B, LARP1, TRPC5, NBN, IFT57, PRKCZ, TAF15, DIP2A, HECW1, PHF19, MRTFA, TAF4B, EBF2, YAP1, NFIA, MAPK1, KMT2E, PCGF5, PDGFD, NRG3, GFRA1, NIPBL, SPIDR, GABPA, CHD6, KANSL1, LIMCH1, ATF6, ITGB8, HIVEP1, MOB3B, AKAP9, KLF15, PPARA, MEIS2, NFIB, MRTFB, NR5A2, FOXJ3, TRERF1, PLAZR1, EIF3D, DAPK1, SLC24A4, AGO2, JARID2, GATAD2B, IL34, ANK2, BCAS3, ZNF606, CLPX, SMARCA4, MAPKAP1, TNRC6C, PIAS1, ATRX, ELAVL4, ABL1, HDAC4, SLC1A1, PRKAA1, MRPS27, DROSHA, APLF, NFAT5, NBAS, RAP1A, GLIS1, TOX3, CAMK4, FGF10, ZC3HAV1, NRG1, INO80D, AP3B1, ZNF438, ZBTB16, MUSK, FOXK2, SLC3A1, MED15, ESRRG, CD44, EGF, PRRC1, RPS6KA3, TRIM5, ATXN3, RFC1, ALG10B, AMBRA1, KDM7A, HTR2A, FANCM, DAZL, GTF2F2, TAF3, RPRD1B, MARK2, EBF3, ZNF33B, PUM1, MSH2, IGF2BP3, SLC2A13, KND1, SPSB4, CLSPN, NOS2, BICRAL, MNAT1, RBBP8, MDFIC, MYLK2, ANK3, HMGA2, CCND3, BCL11B, ECE1, CREM, MBP, TGFA, IL17RA, HIP1, PRR5L, CNTN1, BRCA2, DISC1, BLM, BMP2, RC3H2, PSG9, GFI1B, RANBP9, TMEM161A, ASXL3, POLR3A, RELN, HMGB1, FGF9, NFATC2, MYOM1, ZNF462, TTC21B, ETS2, UIMC1, ATF1, SLAMF1, SMARCA2, ETS1, GLI3, CGAS, SMARCC1, SMOC2, VENTX, IDE, PRDM10, RERE, NEK10, MOB1B, ATF2, HIVEP3, PSIP1, RGM, KITLG, CMTA1, GTF2I, RORB, TADA2A, DAB1, MED27, ZNF208, RB1CC1, NMD3, PRKN, TBX20, DPF3, GRIN2A, ARID5B, PKP1, IL6R, ALS2, NLRC5, TFD1, CNOT6L, TOX, ZFP90, COPS8, USP7, PLAGL1, SOX30, KIR2DL4, RALB, NPAS2, ROCK1, LYN, ZNF780B, DTX1, OVOL2, ZFHX3, BANP, SUPT16H, ARID1B, HOXC13, BAZ1A, CASZ1, INSR, YTHDF3, HECTD1, PBX3, SUMO2, ZNF292, SNAI2, ASH1L, HOXC4, BID, TRABD2B, RXRG, SP3, ERN2, MBTPS2, ELF2, NSD2, CARD10, CTIF, RASGRP1, SNX9, CSNK2A1, BMP5, CSF1, GRIN2B, INO80, FANCB, CLNS1A, SMAD5, CELF4, TCERG1, ABCG1, DCUN1D4, SLC40A1, MED1, CD14B, KDM6A, IL33, GPRC5C, ROR2, ZNF521, BANK1, CSDE1, LMX1A, IL10, ACTR2, SFPQ, R1OK1, PTH, PRKAA2, LARP6, VSTM2A, ETV6, IQGAP1, ZBTB7C, TEAD1, SREBF2, ANP32B, YBX3, NRXN1, PCID2, CADM1, CENPE, LMX1B, TWIST1, ALKAL2, JAK2, ZBTB38, MADD, PATL1, ZNF287, CREBBP, MELTF, TNKS, PCNA, NFKBIA, PRKCB, ABCC8, RFC2, ALX4, RTRA, BRD4, NEDD9, ITGA6, ZBTB49, STOX2, AGO1, MEOX2, ELL2, STAT1, NDFIP2, MAP2K6, MTPN, ABI1, CEMIP, IMPACT, CCBE1, PARK7, MAPK8, OAZ2, MED12L, POU1F1, MTF2, MYOCD, CYFIP2, ARID3B, MEF2C, RXRA, WNT7A, MAP3K5, NDFIP1, MA |

|            |                                                      |                        |                                                                                                                                                                                                                                                                                                                                                                                                                                                                                                                                                                                                                                                                                                                                                                                                                                                                                                                                                        |
|------------|------------------------------------------------------|------------------------|--------------------------------------------------------------------------------------------------------------------------------------------------------------------------------------------------------------------------------------------------------------------------------------------------------------------------------------------------------------------------------------------------------------------------------------------------------------------------------------------------------------------------------------------------------------------------------------------------------------------------------------------------------------------------------------------------------------------------------------------------------------------------------------------------------------------------------------------------------------------------------------------------------------------------------------------------------|
|            |                                                      |                        | P3K4,ZNF112,RAD51AP1,PDE2A,DBF4B,FBXW8,SDCBP,WWOX,PASK,NCK1,SCAF8,FGR,CDCA8,PPP2R3A,MLLT10,RNF8,EPHA4,MECOM,DNMT3L,NTRK2,OCN,CREB5,PRKAB1,PTK2,CDH5,ASCL3,UBE3A,SEMA4D,ZBTB20,RUNX1,POMT2,PTGFR,ZNF845,NOS1AP,PDCL3,CCDC88A,CHCHD2,TNFSF11,FYN,KDM5A,PPM1F,RBMS3,HDAC2,SLF1,TBX15,SH2D3C,DOCK3,MAPK9,PABPC1,CRTAM,TET1,ARNT2,HECW2,ITGA8,GRM5,RPS6KA5,PID1,NRP1,ITGA1,ZNF615,KLF12,RC3H1,NRIP1,ZNF850,SUPT3H,TUT4,PRIM2,FBLN1,PRDM15,MACROH2A1,MITF,EPHB2,BCL2L13,CD38,EYA4,MET,SPPL3,CDH13,MAGI2,PRDM11,MLIP,MYB,SERPINB7,DHX29,BMP7,RNF217,BPTF,NUDT21,KMT2C,PDGFC,RFX2,EYA1,CNOT7,ERBB4,IL20RB,GSAP,ROBO1,SAMD4A,PBX1,NPAS3,PRKCQ,ANTXR1,MGMT,SHLD2,NOS1,PRR16,EFNA5,TCF12,ARHGEF11,RAB27A,NSD1,ESR1,PRLR,AGO3,PIK3R3,HLA-F,EYA2,CCR2,CHFR,ZNF721,NRF1,ROCK2,PRDM1,RORA,STMP1,IL16,DMRT1,HERPUD1,NCOA6,COL4A3,BARD1,STK3,ZNF423,HNRNPU,RAB3GAP2,IGF1R,PRKAG2,GLI2,THRB,AKAP13                                                                       |
| GO:0060560 | developmental growth involved in morphogenesis       | 0.00006359423882415007 | ULK2,RIMS1,RIMS2,AUTS2,DSCAM,MACF1,BCL11A,CDH4,EPHA7,NEDD4L,APP,DCLK1,SEMA5A,SYT1,VCL,AURKA,DIP2B,TRPC5,PRKCZ,COBL,YAP1,ALCAM,FMN1,PAFAH1B1,SEMA3C,TMEM108,SEMA6D,TNR,ABL1,FGF10,EXT1,SEMA3E,DISC1,SEMA3A,SEMA3D,SLC23A2,NIN,DRAXIN,MAP2,DCC,PRKN,ITSN2,NTN1,CSF1,TNN,MED1,IQGAP1,IMPACT,ITGA4,CYFIP2,PPP2R3A,CYFIP1,SEMA4D,SPAG6,NRP1,MAGI2,SLIT2,EFNA5,SLIT3,ESR1,SEMA4B,FSTL4                                                                                                                                                                                                                                                                                                                                                                                                                                                                                                                                                                       |
| GO:0044089 | positive regulation of cellular component biogenesis | 0.00008054120852271529 | MTOR,PTPRD,RIPOR2,RP1,RALA,CDC42EP3,AUTS2,CARMIL1,CNTNAP2,APC,PLPPR5,PTPRJ,NEK7,CRACD,PAK1,ADGRB3,LDB2,SEPTIN9,ATF7IP,STAU2,MAP4K4,DNM3,COBL,SPIDR,LIMCH1,FMN1,TPM1,NF2,AKAP9,SNX30,NAV3,BCAS3,ABL1,HDAC4,GRID2,NRG1,CLIP1,SETDB2,PRKCE,AMBRA1,LINGO2,PLCE1,NHP4,RESF1,UNC13B,BBS4,CNOT6L,RALB,ROCK1,TENM2,BMF,PD4DIP,BID,TRABD2B,SH3GLB1,SNX9,ACTR2,CLSTN2,VASP,MORC2,NRXN1,ANLN,PARK7,CEP120,ADGRB1,WNT7A,SDCBP,NCK1,NTRK2,IL1RAPL1,OCN,MARK4,CDH5,MPP7,CYFIP1,SEMA4D,KIRREL1,SAXO1,ASAP1,CCDC88A,PPM1F,ADGRL2,SLF1,MAPK9,EPHB1,NRP1,FCHSD2,PRKCA,EPHB2,TOGARAM1,MET,CDH17,FILRT2,BMP7,DLG5,SYNDIG1,NLGN1,ASIC2,EFNA5,ESR1,HTT,FER,EPS8,ROCK2,STMP1,ATAT1,WASHC1,RAB3GAP2                                                                                                                                                                                                                                                                            |
| GO:0106027 | neuron projection organization                       | 0.00008182851342848419 | CHRNA7,DOCK10,APP,STAU2,ARHGAP44,ABCD2,PAK3,DNM3,DIP2A,PAFAH1B1,TANC1,CTNND2,PDLIM5,RELN,PLS1,MTMR2,NGEF,INSR,TANC2,GRIN2B,ACTR2,NEDD9,WNT7A,EPHA4,UBE3A,FYN,EPHB1,EPHB2,PPFIA2,KALRN,NLGN1,IGF1R                                                                                                                                                                                                                                                                                                                                                                                                                                                                                                                                                                                                                                                                                                                                                      |
| GO:0007215 | glutamate receptor signaling pathway                 | 0.00009624500017286138 | PLCB1,GRIK3,GRIA1,CPEB4,GRM7,TRPM1,APP,HOMER2,GRIK4,GRM1,GRM8,SLC1A1,GRID2,GNAQ,GRIK2,GRIN2A,GRID1,GRIIN2B,GRIK1,FYN,GRM5,GRM3,GRIA4                                                                                                                                                                                                                                                                                                                                                                                                                                                                                                                                                                                                                                                                                                                                                                                                                   |
| GO:0009893 | positive regulation of metabolic process             | 0.00010161573140397534 | BCAR3,MTOR,NSG1,WWC1,PVT1,ULK2,FTO,MGA,PLCB1,ZFPM2,DLC1,TNRC6B,PDE4D,RDX,BCL2,PRDM16,ALDH1A2,CHRNA7,RIMS1,EPC2,SPIRE1,ZEB1,AKR1C3,RARB,ALK,AUTS2,FOXJ2,BABAM2,GLIS3,FANK1,MLLT3,EGLN3,SPON1,APC,HHLA2,DSCAM,TCF4,CRKL,SETD2,ERG,TNIK,PTPRJ,NEK4,EGFR,RFX3,ANGPT1,CDK12,BACH1,NEK7,NCOR1,ZNF407,NEDD4,MAML2,BCL11A,FLI1,NTRK3,C5,FLT1,RFC3,TASP1,THRAP3,EDAR,PRKD1,PAK1,EPHA7,NCOA7,RAPGEF2,PELI2,LRP2,RUNX2,TAOK3,ONECUT1,SLC24A3,UBE2L3,LDB2,SMYD3,RPTOR,GHR,SSBP3,NEDD4L,ATF7IP,IL1R1,APBB2,APP,RPS6KA2,KDM1B,ZNF600,NTF3,ACER2,AURKA,PARN,ST18,PYGO1,SSBP2,ANKRD31,DUX4,PLGRKT,ABCD2,BMPR1B,FMN2,ZNF717,ARNT,PAK3,RFTN1,DIP2B,RANBP2,LARP1,TRPC5,NBN,SCP2,IFT57,PRKCZ,GRB10,TAF15,DIP2A,HECW1,PHF19,MRTFA,TAF4B,EBF2,YAP1,NFIA,MAPK1,KMT2E,PCGF5,PDGFD,NRG3,GFRA1,NIPBL,SPIDR,GABPA,CHD6,KANSL1,LIMCH1,ATF6,ITGB8,VPS13D,HIVEP1,MOB3B,AKAP9,KLF15,PPARA,MEIS2,SNX30,NFIB,MRTFB,NR5A2,FOXJ3,TRERF1,PLA2R1,EIF3D,DAPK1,SLC24A4,AGO2,JARID2,GATAD2B,IL |

|            |                      |                        |                                                                                                                                                                                                                                                                                                                                                                                                                                                                                                                                                                                                                                                                                                                                                                                                                                                                                                                                                                                                                                                                                                                                                                                                                                                                                                                                                                                                                                                                                                                                                                                                                                                                                                                                                                                                                                                                                                                                                                                                                                                                                                                                                                                                                                                                                                                                                                                                                                                                                                                                                                                                                                                                                                                                                                                                                                                                                                                                                                                                                                                                                                                                                                                                                                                           |
|------------|----------------------|------------------------|-----------------------------------------------------------------------------------------------------------------------------------------------------------------------------------------------------------------------------------------------------------------------------------------------------------------------------------------------------------------------------------------------------------------------------------------------------------------------------------------------------------------------------------------------------------------------------------------------------------------------------------------------------------------------------------------------------------------------------------------------------------------------------------------------------------------------------------------------------------------------------------------------------------------------------------------------------------------------------------------------------------------------------------------------------------------------------------------------------------------------------------------------------------------------------------------------------------------------------------------------------------------------------------------------------------------------------------------------------------------------------------------------------------------------------------------------------------------------------------------------------------------------------------------------------------------------------------------------------------------------------------------------------------------------------------------------------------------------------------------------------------------------------------------------------------------------------------------------------------------------------------------------------------------------------------------------------------------------------------------------------------------------------------------------------------------------------------------------------------------------------------------------------------------------------------------------------------------------------------------------------------------------------------------------------------------------------------------------------------------------------------------------------------------------------------------------------------------------------------------------------------------------------------------------------------------------------------------------------------------------------------------------------------------------------------------------------------------------------------------------------------------------------------------------------------------------------------------------------------------------------------------------------------------------------------------------------------------------------------------------------------------------------------------------------------------------------------------------------------------------------------------------------------------------------------------------------------------------------------------------------------|
|            |                      |                        | <p>34, ANK2, BCAS3, ZNF606, CLPX, SMARCA4, MAPKAP1, TNRC6C, PIAS1, ATRX, ELAVL4, ABL1, HDAC4, SLC1A1, PRKAA1, MRPS27, DROSHA, APLF, NFAT5, NBAS, RAP1A, GLIS1, TOX3, CAMK4, FGF10, ZC3HAV1, NRG1, INO80D, AP3B1, ZNF438, ABCB7, ZBTB16, MUSK, PRKCE, FOXK2, SLC3A1, MED15, ESRRG, CD44, EGF, PRRC1, RPS6KA3, PTPN2, TRIM5, ATXN3, RFC1, HTR2C, ALG10B, AMBRA1, KDM7A, OPRM1, HTR2A, FANCM, DAZL, GTF2F2, TAF3, RPRD1B, MARK2, EBF3, ALPL, ZNF33B, PUM1, MSH2, IGF2BP3, EPHA6, SLC2A13, KNDC1, SPSB4, CLSPN, NOS2, BICRAL, MNAT1, RBBP8, MDFIC, MYLK2, ANK3, HMGA2, CCND3, BCL11B, ECE1, CREM, MBP, TGFA, IL17RA, HIP1, PRR5L, CNTN1, BRCA2, DISC1, BLM, BMP2, RC3H2, PSG9, GFI1B, RANBP9, TMEM161A, ASXL3, POLR3A, RELN, HMGB1, FGF9, NFATC2, MYOM1, ZNF462, TTC21B, ETS2, DSTYK, UIMC1, ATF1, SLAMF1, SMARCA2, ETS1, GLI3, CGAS, SMARCC1, SMOC2, VENTX, IDE, PRDM10, RERE, NEK10, MOB1B, ATF2, HIVEP3, PSIP1, RGM, KITLG, CMTA1, GTF2I, RORB, TADA2A, DAB1, MED27, ZNF208, RB1CC1, NMD3, PRKN, TBX20, DPF3, GRIN2A, ARID5B, PKP1, IL6R, ALS2, NLRC5, TFDP1, CNOT6L, TOX, SLC4A4, ZFP90, COPS8, USP7, VAV3, PLAGL1, SOX30, KIR2DL4, RALB, NPAS2, ROCK1, LYN, ZNF780B, DTX1, OVOL2, ZFH3, BANP, SUPT16H, ARID1B, HOXC13, RNF152, BAZ1A, CASZ1, INSR, YTHDF3, HECTD1, PBX3, SUMO2, ZNF292, SNAI2, ASH1L, HOXC4, BID, TRABD2B, RXRG, SP3, ERN2, MBTPS2, ELF2, NSD2, FYCO1, SH3GLB1, CARD10, CTIF, RASGRP1, SNX9, CSNK2A1, BMP5, CSF1, GRIN2B, INO80, FANCB, CLNS1A, SMAD5, CELF4, TCEERG1, ABCG1, DCUN1D4, SLC40A1, LPGAT1, MED1, CDC14B, KDM6A, IL33, GPRC5C, ROR2, ZNF521, BANK1, CSDE1, LMX1A, IL10, ACTR2, SFPQ, RIOK1, PTH, PRKAA2, LARP6, VSTM2A, ETV6, IQGAP1, ZBTB7C, TEAD1, SREBF2, ANP32B, YBX3, NRXN1, PCID2, CADM1, CENPE, LMX1B, TWIST1, ALKAL2, JAK2, ZBTB38, MADD, PATL1, ZNF287, FH, CREBBP, MELTF, TNKS, PCNA, UFL1, NFKBIA, PRKCB, ABCC8, RFC2, ALX4, RTRAF, BRD4, NEDD9, ITGA6, ASS1, ZBTB49, STOX2, AGO1, MEOX2, ELL2, STAT1, NDFIP2, MAP2K6, MTPN, ABI1, CEMI, IMPACT, CCBE1, PARK7, MAPK8, OAZ2, MED12L, POU1F1, ADCYA, PIR1, MTF2, MYOCD, CYFIP2, ARID3B, MEF2C, ADGRB1, RXRA, WNT7A, MAP3K5, NDFIP1, MAP3K4, ZNF112, RAD51AP1, PDE2A, RAB38, DBF4B, FBXW8, SDCBP, WWOX, PASK, NCK1, SCAF8, FGR, CDCA8, PP2R3A, MLLT10, IFNAR1, RNF8, EPHA4, MECOM, DNMT3L, NTRK2, OCLN, CREB5, PRKAB1, PTK2, CDH5, ASCL3, UBE3A, SEMA4D, ZBTB20, RUNX1, POMT2, PTGFR, ZNF845, NOS1AP, PDCL3, CCDC88A, CHCHD2, TNFSF11, FYN, KDM5A, PPM1F, RBMS3, HDAC2, SLF1, TBX15, SH2D3C, DOCK3, NCS1, MAPK9, PABPC1, CRTAM, ROR1, TET1, ARNT2, HECW2, ITGA8, EPHB1, GRM5, RPS6KA5, PID1, NRP1, ITGA1, ZNF615, KLF12, RC3H1, NRIP1, POR, ZNF850, SUPT3H, TUT4, PRIM2, FBLN1, PRDM15, MACROH2A1, MITF, EPHB2, BCL2L13, CD38, EYA4, MET, SPPL3, CDH13, MAGI2, PRDM11, MLIP, MYB, GNAS, SERPINB7, DHX29, BMP7, RNF217, BPTF, BTBD10, NUDT21, KMT2C, ADGRF5, PDGFC, RFX2, EYA1, CNOT7, ERBB4, IL20RB, GSAP, ROBO1, SAMD4A, PBX1, NPAS3, PRKCQ, ANTXR1, MGMT, SHLD2, NOS1, PRR16, EFNA5, TCF12, ARHGEF11, RAB27A, NSD1, EHMT1, ESR1, PRLR, AGO3, HTT, CAMK1D, PIK3R3, HLA-F, EYA2, CCR2, CHFR, ZNF721, NRF1, HRH1, ROCK2, PRDM1, RORA, STMP1, IL16, DMRT1, HERPUD1, NCOA6, COL4A3, BARD1, STK3, ZNF423, HNRNPU, RAB3GAP2, IGF1R, PRKAG2, GLI2, THRB, AKAP13, MORC3</p> |
| GO:0008104 | protein localization | 0.00010298635197089249 | <p>NSG1, IMMP2L, LONP2, MX2, CLTCL1, SNAP25-AS1, DPP10, ZDHHC21, RIPOR2, RDX, STXBP1, ERC1, RALA, BCL2, MYO5A, FBN1, GPHN, COG5, GPR158, RIMS1, PIK3C3, SPIRE1, CNTLN, EXOC6B, TRAPPC8, USH2A, CEP192, RIMS2, ERBIN, FCHO2, CANG2, GPC6, CNTNAP2, APC, CRKL, ILDR2, SETD2, TANGO6, TNIK, EGFR, RFX3, DENND1A, ANGPT1, MACF1, NEDD4, GNPTAB, CRB1, ZFAND6, DNAJC13, RABEP1, NUP214, TOM1L2, CEP128, PRKD1, RAPGEF2, LRP2, AGK, RANBP17, UBE2L3, PTPRN2, SMYD3, HERC2, SEPTIN9, EPB41L3, NEDD4L, ADAM10, CACNB2, DCLK1, MAPRE2, VCL, ARHGAP44, NDUFAF2, CD2AP, AURKA, PYGO1, FMN2, AKAP6, RAB8B, RFTN1, RANBP2, RAP1GDS1, KICS2, CUBN, SCP2, PRKCZ, MCPH1, RAB27B, CNST, YAP1, VPS35L, CADPS2, RABGAP1L, SGTB, ADAM22,</p>                                                                                                                                                                                                                                                                                                                                                                                                                                                                                                                                                                                                                                                                                                                                                                                                                                                                                                                                                                                                                                                                                                                                                                                                                                                                                                                                                                                                                                                                                                                                                                                                                                                                                                                                                                                                                                                                                                                                                                                                                                                                                                                                                                                                                                                                                                                                                                                                                                                                                                                                  |



|            |                                           |                        |                                                                                                                                                                                                                                                                                                                                                                                                                                                                                                                                                                                                                                                                                                                                                                                                                                                                                                                                                                                                                                                                                                                                                                                                                                                                                                                                                                                                                                                                                                                                                                                                                                                                                                                                                                                                                                                                                                                                                                                                                                                                                                                                                                                                                                                                                                                                                                                                                                                                                                                                                                                                                  |
|------------|-------------------------------------------|------------------------|------------------------------------------------------------------------------------------------------------------------------------------------------------------------------------------------------------------------------------------------------------------------------------------------------------------------------------------------------------------------------------------------------------------------------------------------------------------------------------------------------------------------------------------------------------------------------------------------------------------------------------------------------------------------------------------------------------------------------------------------------------------------------------------------------------------------------------------------------------------------------------------------------------------------------------------------------------------------------------------------------------------------------------------------------------------------------------------------------------------------------------------------------------------------------------------------------------------------------------------------------------------------------------------------------------------------------------------------------------------------------------------------------------------------------------------------------------------------------------------------------------------------------------------------------------------------------------------------------------------------------------------------------------------------------------------------------------------------------------------------------------------------------------------------------------------------------------------------------------------------------------------------------------------------------------------------------------------------------------------------------------------------------------------------------------------------------------------------------------------------------------------------------------------------------------------------------------------------------------------------------------------------------------------------------------------------------------------------------------------------------------------------------------------------------------------------------------------------------------------------------------------------------------------------------------------------------------------------------------------|
|            |                                           |                        | <p>COPB1, SYCP1, NIPBL, SLC16A1, SPIDR, IPO11, CORO2B, PAFAH1B1, TM7SF3, VPS13D, TLK1, NF2, ZDHHC14, CTNNA1, SNX30, PTPRK, PARD3B, VPS13C, DNAH11, JARID2, RAB22A, DNAJC15, CPE, ANK2, ADGRV1, BCAS3, RYR2, BBS2, RANBP3L, NBEA, DUSP16, USP8, PARD3, TBC1D5, BLK, ATRX, ABL1, SLC1A1, PRKAA1, FHIP1A, CCD C91, EIPR1, NBAS, RAP1A, GPC5, PLEKHA8, FGF10, GRID2, LATS2, AP3B1, SYNE1, ZBTB16, MUSK, PRKCE, SLMAP, DENND4C, CEP83, FBN2, EGF, PEX14, SCG5, TRIM5, ATXN3, RIC3, LTBP1, OPRM1, HT R2A, STAC, TAF3, ABHD17C, MSH2, APBA2, MAIP1, TNPO3, NOS2, T TC7B, MDFIC, ANK3, COG2, VPS41, LYPLA1, HIP1, PRR5L, VPS37A, EFR3A, TJP1, NPHP4, PACSIN2, SNX3, BHLHE40-AS1, BRCA2, DISC1, WDPCP, SLC10A7, LRP1B, STX12, TRAK1, MSR 1, VRK1, GNAI1, MYRIP, SLC15A5, RELN, NUDCD3, AP4E1, FGF9, M YOM1, UNC13B, TTC21B, PLS1, SNX8, SEC23B, NIN, CCDC186, GLI 3, SNX6, PACS1, MAP2, PEX6, RRBP1, ATF2, BBS4, KIAA0753, CFT R, KPNA1, CSE1L, DOP1B, TBC1D13, PHAF1, NMD3, AKAP10, PRKN, LYST, GRIN2A, PRKCH, FRMD4A, ALS2, SNX25, FBLN5, TSPAN33, L RBA, MAP7, MON2, MESD, MYO1D, SEC24D, ROCK1, SEL1L, SUMO3, S LC15A2, RRAGD, BANP, NPIPA1, DMBT1, HECTD1, SHROOM3, XRCC4, COLQ, ARFGEF1, BID, PIGK, RPH3A, UFD1, TOM1, ZDHHC17, NSD2, SH3GLB1, CARD10, TMED3, IGSF11, SNX9, WDR72, NUP37, BCL2L 1, HCN1, ABCG1, FAM149B1, MICALL2, MED1, ATG4B, PCNT, IL10, PRKAA2, NDC80, PACRG, SCFD2, CAMLG, SREBF2, ANP32B, FYB2, N RXN1, PCID2, SNAP91, JAK2, RPF2, CELSR2, TNKS, ARL11, SIAH3, UFL1, NFKBIA, PRKCB, ABCC8, MIPEP, USH1C, NEDD9, MTCL1, GR IP1, TM9SF3, SAR1A, BBS9, EXOC1, HEPACAM, NDFIP2, SHROOM2, RN7SL483P, CEMIP, PARK7, MAPK8, ITGA4, OAZ2, BCAP29, UBE2J 2, NDC1, TM9SF4, RAPGEF4, CEP120, ARL4C, WNT7A, NDFIP1, CHA MP1, RAB38, SDCBP, NECTIN1, TRIM23, SNAP29, INTS13, NUMB, A DAMTS9, RN7SL767P, OCLN, SHISA6, AKAP11, KTN1, MVB12B, MAR K4, CDH5, AP4S1, CLDN18, MPP7, DIAPH1, SCAMP1, SCG3, FRMD6, AP2B1, HEATR5A, ICA1, MTTP, SRP9, CCDC88A, BICD1, FYN, PPM1 F, ARL13B, XPO7, ODR4, SLF1, EHBP1, MAPK9, ASB3, CDH2, ITGA8, GPR137B, ZDHHC18, TBC1D1, PID1, NRP1, FCHSD2, RNF215, MCC, BCR, ARFGAP3, TM9SF2, B9D1, BMPER, RABL2A, DPP6, MACROH2A 1, EPHB2, CD38, MYO5B, RGPD4, PPIL2, AKAIN1, DLG2, STXBP4, C ACNG3, MAGI2, VMP1, GNAS, MFHAS1, NUP43, BMP7, ASTN2, DLG5, GAPVD1, DDX6, VPS13B, EXOC4, FAM126A, KCNIP4, ERBB4, FAM3B, FAM126B, SYNDIG1, RGPD2, SAMM50, SORCS2, NLGN1, ASIC2, EF NA5, GAS2L1, KIF13A, AP5M1, ESR1, ZDHHC11B, AGAP1, ROCK2, C DCA5, RAB31, HERPUD1, WASHC1, HOOK3, BARD1, STK3, ZNF423, H NRNPU, VTI1A, CEP72, RAB3GAP2, CADPS, TANGO2, MORC3, SEPTI N6, DNM1L</p> |
| GO:0034765 | regulation of ion transmembrane transport | 0.00011136382215869427 | <p>CACNA2D3, KCNH5, DPP10, PDE4D, BCL2, KCNMA1, ANO6, CACNG2, NEDD4, PRKD1, CHRM3, FGF12, TMEM38B, THADA, NEDD4L, APP, CA CNA1C, CACNB2, TMC1, SLC8A1, KCNE4, AKAP6, KCNK10, CLIC6, H ECW1, KCNJ1, LRRC38, AKAP9, RASGRF2, KCNS3, DAPK1, SCN2A, A NK2, RYR2, ABL1, KCNH1, GSG1L, RASGRF1, PRKCE, SLMAP, WNK2, ABCC9, ALG10B, OPRM1, STAC, CNIH3, KCND2, ANK3, CACNA1I, KC NJ15, SCN11A, NETO2, RELN, KCNH8, CNKSR3, CFTR, SELENON, GR IN2A, JPH1, KCNQ3, SHISA9, SCN10A, KCND3, LYN, CRACR2A, UTR N, KCNC1, HCN1, GRIN2B, KCNK5, NRXN1, TWIST1, ABCC8, CACNA1 E, KCNJ18, CEMIP, PARK7, ADCYAP1R1, MEF2C, SHISA6, DIAPH1, NOS1AP, FYN, SCN8A, NALCN, HECW2, GRM5, ATPSCMT, KCNJ6, DP P6, EPHB2, TSPAN13, CACNG3, ATG5, VMP1, KCNIP4, TRDN, NLGN1, NOS1, ASIC2, KCNQ5, CACNA2D1, HTT, CCR2, CATSPER2, RGS7, K CNAB1</p>                                                                                                                                                                                                                                                                                                                                                                                                                                                                                                                                                                                                                                                                                                                                                                                                                                                                                                                                                                                                                                                                                                                                                                                                                                                                                                                                                                                                                                                                                                                                                                                                                                                                                                                                                                                            |
| GO:0030335 | positive regulation of cell migration     | 0.00011230493190196989 | <p>MTOR, RIPOR2, RDX, BCL2, CARMIL1, RIN2, ANO6, APC, CRKL, EGF R, ANGPT1, NTRK3, FLT1, PRKD1, PAK1, RAPGEF2, ONECUT1, ADAM 10, HDAC9, IL1R1, APP, DOCK8, MAPRE2, SEMA5A, NTF3, SLC8A1, SRGAP2C, MAP4K4, PAK3, MAPK1, MGAT5, PDGFD, NIPBL, TIAM1, S EMA3C, AGO2, IL34, BCAS3, SYNE2, SEMA6D, DOCK4, ABL1, HDAC4, FGF10, PRKCE, EGF, ARHGEF7, ATP8A1, SEMA3E, DOCK5, TJP1, I QSEC1, SEMA3A, BMP2, SEMA3D, RELN, HMGB1, FGF9, DOCK1, SLAM F1, ETS1, SMOC2, KITLG, IL6R, LYN, INSR, SNAI2, JCAD, TWIST2, CSF1, ROR2, AKT3, JAK2, NEDD9, ITGA6, CEMIP, CCBE1, ITGA4,</p>                                                                                                                                                                                                                                                                                                                                                                                                                                                                                                                                                                                                                                                                                                                                                                                                                                                                                                                                                                                                                                                                                                                                                                                                                                                                                                                                                                                                                                                                                                                                                                                                                                                                                                                                                                                                                                                                                                                                                                                                                                             |

|            |                                  |                        |                                                                                                                                                                                                                                                                                                                                                                                                                                                                                                                                                                                                                                                                                                                                                                                                                                                                                                                                                                                                                                                                                                                                                                                                                                              |
|------------|----------------------------------|------------------------|----------------------------------------------------------------------------------------------------------------------------------------------------------------------------------------------------------------------------------------------------------------------------------------------------------------------------------------------------------------------------------------------------------------------------------------------------------------------------------------------------------------------------------------------------------------------------------------------------------------------------------------------------------------------------------------------------------------------------------------------------------------------------------------------------------------------------------------------------------------------------------------------------------------------------------------------------------------------------------------------------------------------------------------------------------------------------------------------------------------------------------------------------------------------------------------------------------------------------------------------|
|            |                                  |                        | WNT7A,SDCBP,FGR,EPHA4,NUMB,FBXO31,PTK2,CDH5,DIAPH1,LAMB1,SEMA4D,JAM2,WNT5B,PPM1F,APELA,NRP1,PRKCA,FBLN1,RRAS2,EPHB2,MET,CDH13,BMP7,PDGFC,ABL2,CAMK1D,PIK3R3,FER,CCR2,SEMA4B,ROCK2,WASHC1,IGF1R,DNM1L                                                                                                                                                                                                                                                                                                                                                                                                                                                                                                                                                                                                                                                                                                                                                                                                                                                                                                                                                                                                                                         |
| GO:0051336 | regulation of hydrolase activity | 0.000113080369772578   | BCAR3,MTOR,SPOCK1,GARNL3,MYO9A,DLC1,RIPOR2,RDX,FGD4,EGLN3,CRKL,ARHGAP24,DOCK10,EGFR,DENND1A,USP14,NTRK3,C5,FLT1,DGKI,CAST,PRKD1,EPHA7,RALGPS1,RAPGEF2,RALGAPA1,RAPGEF5,HDAC9,APP,DOCK8,MAPRE2,ARHGAP44,NTF3,ACER2,ST18,SERPINA6,MAP4K4,PCSK6,RAP1GDS1,IFT57,PRKCZ,MGAT5,RABGAP1L,ITIH5,UBE20,CARD18,TBC1D22A,CHN1,PAFAH1B1,BIRC6,RASGRF2,PPP6R3,RGL1,TIAM1,ARAP2,PLA2R1,DAPK1,TBC1D9,BCAS3,CLPX,TBC1D5,NUAK1,ABL1,SLC1A1,PSMF1,RAP1A,RASGRF1,ASAP2,CD44,PDE3A,RPS6KA3,PLXNA2,ARHGEF7,HTR2A,MBP,HIP1,CRIM1,VAV1,IQSEC1,BMP2,EVI5,RALGAPA2,SGSM1,TBC1D4,ARHGAP42,HMGB1,GNAQ,CPAMD8,RAP1GAP,SRGAP2,UMODL1,BBS4,TBC1D13,RCAN1,NGEF,GRIN2A,ALS2,DOCK9,VAV3,ROCK1,LYN,CTSB,ARFGEF1,BID,SLAH2,RALGPS2,RASGRP1,SNX9,TMEM225,CSNK2A1,SERPINB9,PRKG1,GRIN2B,PSAP,RASGEF1C,PTH,IQGAP1,ANP32B,PCID2,FICD,NET1,SIPA1L2,JAK2,PCNA,ZC3H15,NEDD9,ITGA6,PPP1R17,PARK7,MAPK8,ADCYAP1R1,RAPGEF4,CYFIP2,MEF2C,MAP3K5,SERPINI2,EPHA4,NTRK2,PTK2,ARHGAP12,SEMA4D,SERPINB10,RASGEF1B,ASAP1,GPR55,BICD1,FYN,KDM5A,PPM1F,GPR137B,TBC1D1,ITGA1,POR,BCR,RGS6,FBLN1,RAG1,BCL2L13,MET,SERPINB2,MAGI2,KALRN,GNAS,SERPINB7,TIAM2,TNFAIP8,GAPVD1,WDR41,ABL2,TRAPPC6B,SERPINB11,ROBO1,ANTXR1,SIPA1L3,MGMT,NOS1,EFNA5,ESR1,HTT,A2M,SPOCK3,ROCK2,RGS8,COILA3,RGS7,RSU1,RAB3GAP2 |
| GO:0045216 | cell-cell junction organization  | 0.00012704501115436232 | TLN2,RDX,CDH8,CNTNAP2,APC,PATJ,EPB41L3,TBCD,ADAM10,VCL,NF2,CTNNA1,CDH7,ANK2,CDH11,PARD3,CXADR,XIRP2,CDH18,CDHR3,PTPRO,EXT1,CTNND2,CDH20,TJP1,NPH4,STRN,PRKCH,PKP1,ROCK1,SNAI2,CD9,MICALL2,HIPK1,SVEP1,ABCC8,PKN2,NECTIN1,DSG1,EPHA4,NUMB,OCN,CDH5,CLDN18,MPP7,KIRREL1,CDH9,CDH2,PRKCA,CDH12,EPHB2,DLG5,FER,ROCK2,CLDN10                                                                                                                                                                                                                                                                                                                                                                                                                                                                                                                                                                                                                                                                                                                                                                                                                                                                                                                      |
| GO:0007611 | learning or memory               | 0.00013177878702276956 | PLCB1,CHRNA7,PJA2,CNTNAP2,EGFR,BTBD9,DGKI,GRIA1,SLC8A3,ADGRB3,APP,NTF3,TAF2A,KCNK10,PRKCZ,BRINP1,MAPK1,SORCS3,PAFAH1B1,MEIS2,SYNJ1,PAK5,DNAH11,SCN2A,TANC1,TNR,ELAVL4,ABL1,SLC1A1,CAMK4,RASGRF1,MUSK,ATP8A1,HTR2A,TMOD2,RELN,RCAN1,PRKN,GRIN2A,ATXN1,SHANK2,INSR,GRIN2B,LMX1A,ACTR2,NRXN1,ABCC8,NEDD9,SLC6A1,CSMD1,MEF2C,S100B,FOXO6,GABRA5,NTRK2,UBE3A,AMFR,FYN,ITGA8,GRM5,NRXN3,RAG1,EPHB2,SPECC1,KALRN,HTT,FOXB1,HRH1                                                                                                                                                                                                                                                                                                                                                                                                                                                                                                                                                                                                                                                                                                                                                                                                                     |
| GO:0007507 | heart development                | 0.00013190635197864748 | NOTCH2,MTOR,SGCD,NEBL,ZFPM2,TENM4,DLC1,ODAD2,ALDH1A2,FBN1,ROBO2,RARB,SPRED1,CRKL,SETD2,EGFR,SOX6,NTRK3,ADAMTS6,LRP2,FGF12,LUZP1,HDAC9,RPS6KA2,CACNA1C,SLC8A1,AKAP6,IFT57,YAP1,MAPK1,NIPBL,MYLK3,TM1,PPARA,SEMA3C,ALPK2,DNAH11,JARID2,CPE,ANK2,RYR2,ANKS6,LDB3,CXADR,XIRP2,DNAH5,NRG1,SETDB2,ALPK3,EXT1,FHL2,MNAT1,SGCZ,MYLK2,ECE1,PLCE1,PDLIM5,BMP2,PTCD2,FGF9,GLI3,DAW1,ATF2,BBS4,COL5A1,RB1CC1,TBX20,ADGRG6,ROCK1,VCAM1,OVOL2,INSR,HECTD1,SNAI2,RXRG,NSD2,BMP5,CTDP1,DHRS3,SMAD5,MED1,KDM6A,CACYBP,TWIST1,PCNA,MYO18B,ASB2,MYOCD,MEF2C,PDE2A,ADAMTS9,TNNI1,PTK2,FAT4,AP2B1,RUNX1,SORBS2,ARL13B,APELA,NRP1,MB,SGCG,ATG5,NRAP,FLRT2,GREB1L,BMP7,EYA1,FHOD3,SLIT2,ERBB4,ROBO1,SLIT3,ROCK2,PRDM1,NCOA6,STK3,HNRNPU,IGF1R,GLI2,AKAP13                                                                                                                                                                                                                                                                                                                                                                                                                                                                                                           |
| GO:0006935 | chemotaxis                       | 0.0001362992476978994  | NOTCH2,CNTN4,RIPOR2,RALA,ROBO2,ANO6,DSCAM,CRKL,PTPRJ,USP14,ANGPT1,DOCK2,CDH4,NTRK3,C5,FLT1,NEO1,CNTN6,PRKD1,EPHA7,ADAMTSL1,TAF2A,CCL28,ADAM10,APP,MTUS1,SEMA5A,NTF3,PLGRKT,BMPR1B,MAPK1,ALCAM,PDGFD,NRG3,NCAM1,CHN1,NFIB,PRTG,ENAH,SEMA3C,IL34,SEMA6D,TNR,CXADR,DOCK4,FGF10,NRG1,USP33,PTPRO,TRIO,EXT1,PTPN2,PLXNA2,BIN2,SEMA3E,EPHA6,BCL11B,ECE1,IL17RA,VAV1,CNTN1,SEMA3A,UNC5D,RIN3,SEMA3D,RELN,HMGB1,DRAXIN,SLAMF1,GLI3,SMOC2,ITGA9,DCC,LYST,IL6R,VAV3,LYN,VCAM1,NTN1,DP                                                                                                                                                                                                                                                                                                                                                                                                                                                                                                                                                                                                                                                                                                                                                                  |

|            |                                     |                        |                                                                                                                                                                                                                                                                                                                                                                                                                                                                                                                                                                                                                                                                                                                                                                                                                                                                                                                                                                                                                                                                                                                                                                                                                                                                                                                                                                                                                                                                                                                                                                                                                                                                                                                                                                                                                                                                                                                                                                                                                                                                                                                                                                                                                                                                                                                                                                                                                                                                                                                                                                                                                                                                                                                                                                                                                                                                    |
|------------|-------------------------------------|------------------------|--------------------------------------------------------------------------------------------------------------------------------------------------------------------------------------------------------------------------------------------------------------------------------------------------------------------------------------------------------------------------------------------------------------------------------------------------------------------------------------------------------------------------------------------------------------------------------------------------------------------------------------------------------------------------------------------------------------------------------------------------------------------------------------------------------------------------------------------------------------------------------------------------------------------------------------------------------------------------------------------------------------------------------------------------------------------------------------------------------------------------------------------------------------------------------------------------------------------------------------------------------------------------------------------------------------------------------------------------------------------------------------------------------------------------------------------------------------------------------------------------------------------------------------------------------------------------------------------------------------------------------------------------------------------------------------------------------------------------------------------------------------------------------------------------------------------------------------------------------------------------------------------------------------------------------------------------------------------------------------------------------------------------------------------------------------------------------------------------------------------------------------------------------------------------------------------------------------------------------------------------------------------------------------------------------------------------------------------------------------------------------------------------------------------------------------------------------------------------------------------------------------------------------------------------------------------------------------------------------------------------------------------------------------------------------------------------------------------------------------------------------------------------------------------------------------------------------------------------------------------|
|            |                                     |                        | YSL5, CSF1, LAMA3, LMX1A, IL10, VASP, NRXN1, NEDD9, GAP43, CMTM7, NECTIN1, CXCL2, EPHA4, LHX9, PTK2, FEZ2, CYFIP1, SEMA4D, TNFSF11, FYN, PPM1F, CNTN5, EPHB1, RPS6KA5, NRP1, ITGA1, NRXN3, EPHB2, MET, CDH13, FLRT2, KALRN, LAMA1, BMP7, SLIT2, CCDC141, ROBO1, PRKCQ, EFNA5, SLIT3, CAMK1D, FER, CCR2, SEMA4B, HRH1, IL16, GLI2, DNM1L                                                                                                                                                                                                                                                                                                                                                                                                                                                                                                                                                                                                                                                                                                                                                                                                                                                                                                                                                                                                                                                                                                                                                                                                                                                                                                                                                                                                                                                                                                                                                                                                                                                                                                                                                                                                                                                                                                                                                                                                                                                                                                                                                                                                                                                                                                                                                                                                                                                                                                                            |
| GO:0060284 | regulation of cell development      | 0.0001544301392777993  | NOTCH2, MTOR, PTPRD, ULK2, PLCB1, TENM4, ZDHHC21, BCL2, FBN1, ROBO2, CARMIL1, DSCAM, CRKL, RFX3, MACF1, BCL11A, CDH4, NTRK3, EPHA7, SPEN, RAPGEF2, LRP2, HDAC9, STAU2, SEMA5A, VCL, AURKA, KANK1, PAK3, DIP2B, TRPC5, YAP1, BRINP1, PAFAH1B1, NF2, CTNNA1, PRTG, SYNJ1, TIAM1, SEMA3C, IL34, SEMA6D, TNFR, ABL1, HDAC4, ASPM, PDE3A, PLXNA2, ARHGEF7, OPRM1, SEMA3E, DOCK5, MBP, DISC1, SEMA3A, BMP2, SEMA3D, RELN, DOCK1, NIN, DRAXIN, GLI3, MAP2, DCC, DAB1, PRKCH, ROCK1, LYN, NTN1, DPYSL5, TRIM58, IL33, ACTR2, MAP6, MELTF, UFL1, ABCC8, NEDD9, OLFM4, WNT7A, FBXW8, EPHA4, NTRK2, IL1RAPL1, NUMB, FBXO31, CDH5, CLDN18, CYFIP1, SEMA4D, TNFSF11, HDAC2, GRM5, NRP1, FAIM, CHODL, FBLN1, CUX1, EPHB2, KALRN, TIAM2, BMP7, SLIT2, ROBO1, EFNA5, SEMA4B, ROCK2, HOOK3, FSTL4                                                                                                                                                                                                                                                                                                                                                                                                                                                                                                                                                                                                                                                                                                                                                                                                                                                                                                                                                                                                                                                                                                                                                                                                                                                                                                                                                                                                                                                                                                                                                                                                                                                                                                                                                                                                                                                                                                                                                                                                                                                                                   |
| GO:0070727 | cellular macromolecule localization | 0.00015509464846155885 | NSG1, IMMP2L, LONP2, MX2, CLTCL1, SNAP25-AS1, DPP10, ZDHHC21, RIPOR2, RDX, STXBP1, ERC1, RALA, BCL2, MYO5A, FBN1, GPHN, COG5, GPR158, RIMS1, PIK3C3, SPIRE1, CNTLN, EXOC6B, TRAPPC8, USH2A, CEP192, RIMS2, ERBIN, FCHO2, CACNG2, GPC6, CNTNAP2, APC, CRKL, ILDR2, SETD2, TANGO6, TNIK, EGFR, RFX3, DENND1A, ANGPT1, MACF1, NEDD4, GNPTAB, CRB1, ZFAND6, DNAJC13, RABEP1, NUP214, TOM1L2, CEP128, PRKD1, RAPGEF2, LRP2, AGK, RANBP17, UBE2L3, PTPRN2, SMYD3, HERC2, SEPTIN9, EPB41L3, NEDD4L, ADAM10, CACNB2, DCLK1, MAPRE2, VCL, ARHGAP44, NDUFAF2, CD2AP, AURKA, PYGO1, FMN2, AKAP6, RAB8B, RFTN1, RANBP2, RAP1GDS1, KICS2, CUBN, SCP2, PRKCZ, MCPH1, RAB27B, CNST, YAP1, VPS35L, CADPS2, RABGAP1L, SGTB, ADAM22, COPB1, SYCP1, NIPBL, SLC16A1, SPIDR, IPO11, CORO2B, PAFAH1B1, TM7SF3, VPS13D, TLK1, NF2, ZDHHC14, CTNNA1, SNX30, PTPRK, PARD3B, VPS13C, DNAH11, JARID2, RAB22A, DNAJC15, CPE, ANK2, ADGRV1, BCAS3, RYR2, BBS2, RANBP3L, NBEA, DUSP16, USP8, PARD3, TBC1D5, BLK, ATRX, ABL1, SLC1A1, PRKAA1, FHIP1A, CCD C91, EIPR1, NBAS, RAP1A, GPC5, PLEKHA8, FGF10, GRID2, LATS2, AP3B1, SYNE1, ZBTB16, MUSK, PRKCE, SLMAP, DENND4C, CEP83, FBN2, EGF, PEX14, SCG5, TRIM5, ATXN3, RIC3, LTBP1, OPRM1, HTR2A, STAC, TAF3, ABHD17C, MSH2, APBA2, MAIP1, TNPO3, NOS2, TCTC7B, MDFIC, ANK3, COG2, VPS41, LYPLA1, HIP1, PRR5L, VPS37A, EFR3A, TJP1, NPHP4, PACSIN2, SNX3, BHLHE40-AS1, BRCA2, DISC1, WDPCP, SLC10A7, LRP1B, STX12, TRAK1, MSR1, VRK1, GNAI1, MYRIP, SLC15A5, RELN, NUDCD3, AP4E1, FGF9, MYOM1, UNC13B, TTC21B, PLS1, SNX8, SEC23B, NIN, CCDC186, GLI3, SNX6, PACS1, MAP2, PEX6, RRBP1, ATF2, BBS4, KIAA0753, CFT R, KPNA1, CSE1L, DOP1B, TBC1D13, PHAF1, NMD3, AKAP10, PRKN, LYST, GRIN2A, PRKCH, FRMD4A, ALS2, SNX25, FBLN5, TSPAN33, LRBA, MAP7, MON2, MESD, MYO1D, SEC24D, ROCK1, SEL1L, SUMO3, SLC15A2, RRAGD, BANP, NPIPA1, DMBT1, HECTD1, SHROOM3, XRCC4, COLQ, ARFGEF1, BID, PIGK, RPH3A, UFD1, TOM1, ZDHHC17, NSD2, SH3GLB1, CARD10, TMED3, IGSF11, SNX9, WDR72, NUP37, BCL2L1, HCN1, ABCG1, FAM149B1, MICALL2, MED1, ATG4B, PCNT, IL10, PRKAA2, NDC80, PACRG, SCFD2, CAMLG, SREBF2, ANP32B, FYB2, NRXN1, PCID2, SNAP91, JAK2, RPF2, CELSR2, TNKS, ARL11, SIAH3, UFL1, NFKBIA, PRKCB, ABCC8, MIPEP, USH1C, NEDD9, MTCL1, GRIP1, TM9SF3, SAR1A, BBS9, EXOC1, HEPACAM, NDFIP2, SHROOM2, RN7SL483P, CEMIP, PARK7, MAPK8, ITGA4, OAZ2, BCAP29, UBE2J2, NDC1, TM9SF4, RAPGEF4, CEP120, ARL4C, WNT7A, NDFIP1, CHAMP1, RAB38, SDCBP, NECTIN1, TRIM23, SNAP29, INTS13, NUMB, DAMTS9, RN7SL767P, OCLN, SHISA6, AKAP11, KTN1, MVB12B, MARK4, CDH5, AP4S1, CLDN18, MPP7, DIAPH1, SCAMP1, SCG3, FRMD6, AP2B1, HEATR5A, ICA1, MTTP, SRP9, CCDC88A, BICD1, FYN, PPM1F, ARL13B, XPO7, ODR4, SLF1, EHBFP1, MAPK9, ASB3, CDH2, ITGA8, GPR137B, ZDHHC18, TBC1D1, PID1, NRP1, FCHSD2, RNF215, MCC, BCR, ARFGAP3, TM9SF2, B9D1, BMPER, RABL2A, DPP6, MACROH2A |

|            |                                           |                        |                                                                                                                                                                                                                                                                                                                                                                                                                                                                                                                                                                                                                                                                                                                                                                                                                                                                                                                                                                                                          |
|------------|-------------------------------------------|------------------------|----------------------------------------------------------------------------------------------------------------------------------------------------------------------------------------------------------------------------------------------------------------------------------------------------------------------------------------------------------------------------------------------------------------------------------------------------------------------------------------------------------------------------------------------------------------------------------------------------------------------------------------------------------------------------------------------------------------------------------------------------------------------------------------------------------------------------------------------------------------------------------------------------------------------------------------------------------------------------------------------------------|
|            |                                           |                        | 1,EPHB2,CD38,MYO5B,RGPD4,PPIL2,AKAIN1,DLG2,STXBP4,CACNG3,MAGI2,VMP1,GNAS,MFHAS1,NUP43,BMP7,ASTN2,DLG5,GAPVD1,DDX6,VPS13B,EXOC4,FAM126A,KCNIP4,ERBB4,FAM3B,FAM126B,SYNDIG1,RGPD2,SAMM50,SORCS2,NLGN1,ASIC2,EFNA5,GAS2L1,KIF13A,AP5M1,ESR1,ZDHHC11B,AGAP1,ROCK2,CDA5,RAB31,HERPUD1,WASHC1,HOKK3,BARD1,STK3,ZNF423,HNRNPU,VTI1A,CEP72,RAB3GAP2,CADPS,TANGO2,MORC3,SEPTIN6,DNM1L                                                                                                                                                                                                                                                                                                                                                                                                                                                                                                                                                                                                                             |
| GO:0042330 | taxis                                     | 0.00016500479370034225 | NOTCH2,CNTN4,RIPOR2,RALA,ROBO2,ANO6,DSCAM,CRKL,PTPRJ,USP14,ANGPT1,DOCK2,CDH4,NTRK3,C5,FLT1,NEO1,CNTN6,PRKD1,EPHA7,ADAMTSL1,TAF4A,CCL28,ADAM10,APP,MTUS1,SEMA5A,NTF3,PLGRKT,BMPR1B,MAPK1,ALCAM,PDGFD,NRG3,NCA M1,CHN1,NFIB,PRTG,ENAH,SEMA3C,IL34,SEMA6D,TNR,CXADR,DOCK4,FGF10,NRG1,USP33,PTPRO,TRIO,EXT1,PTPN2,PLXNA2,BIN2,SEMA3E,EPHA6,BCL11B,ECE1,IL17RA,VAV1,CNTN1,SEMA3A,UNC5D,RIN3,SEMA3D,RELN,HMGB1,DRAXIN,SLAMF1,GLI3,SMOC2,ITGA9,DCC,LYST,IL6R,VAV3,LYN,VCAM1,NTN1,DPLYSL5,CSF1,LAMA3,LMX1A,IL10,VASP,NRXN1,NEDD9,GAP43,CTM7,NECTIN1,CXCL2,EPHA4,LHX9,PTK2,FEZ2,CYFIP1,SEMA4D,TNFSF11,FYN,PPM1F,CNTN5,EPHB1,RPS6KA5,NRP1,ITGA1,NRXN3,EPHB2,MET,CDH13,FLRT2,KALRN,LAMA1,BMP7,SLIT2,CCDC141,ROBO1,PRKCQ,EFNA5,SLIT3,CAMK1D,FER,CCR2,SEMA4B,HRH1,IL16,GLI2,DNM1L                                                                                                                                                                                                                                     |
| GO:0043547 | positive regulation of GTPase activity    | 0.00017813926499723746 | BCAR3,GARNL3,MYO9A,CRKL,ARHGAP24,DOCK10,DENND1A,NTRK3,RALGPS1,RAPGEF2,RALGAP1,RAPGEF5,DOCK8,MAPRE2,NTF3,MAP4K4,RAP1GDS1,RABGAP1L,TBC1D22A,CHN1,RASGRF2,RGL1,TIAM1,ARAP2,TBC1D9,BCAS3,TBC1D5,RAP1A,RASGRF1,ASAP2,ARHGEF7,VAV1,IQSEC1,EVI5,RALGAP2,SGSM1,TBC1D4,ARHGAP42,RAP1GAP,SRGAP2,TBC1D13,NGEF,ALS2,DOCK9,RALGPS2,RASGRP1,SNX9,RASGEF1C,NET1,SIPA1L2,ZC3H15,NEDD9,ITGA6,RAPGEF4,SEMA4D,RASGEF1B,ASAP1,TBC1D1,BCR,RGS6,KALRN,GNAS,TIAM2,WDR41,SIPA1L3,RGS8,RGS7,RSU1                                                                                                                                                                                                                                                                                                                                                                                                                                                                                                                                  |
| GO:0034762 | regulation of transmembrane transport     | 0.00017913338800358864 | CACNA2D3,KCNH5,CLTCL1,DPP10,PDE4D,BCL2,KCNMA1,ANO6,CACNG2,NEDD4,PRKD1,CHRM3,FGF12,TMEM38B,THADA,NEDD4L,APP,CACNA1C,CACNB2,TMC1,SLC8A1,KCNE4,AKAP6,KCNK10,CLIC6,GRB10,HECW1,KCNJ1,LRR338,AKAP9,KLF15,RASGRF2,KCNS3,DAPK1,SCN2A,ANK2,RYR2,ABL1,KCNH1,GSG1L,RASGRF1,PRKCE,SLMAP,WNK2,ABCC9,ALG10B,OPRM1,STAC,CNIH3,KCND2,ANK3,CACNA1I,KCNJ15,SCN11A,NETO2,RELN,KCNH8,CNKSR3,CFTR,SELENON,GRIN2A,JPH1,KCNQ3,SHISA9,SCN10A,KCND3,LYN,CRACR2A,INSR,ENPP1,UTRN,KCNC1,HCN1,GRIN2B,KCNK5,PTH,NRXN1,TWIST1,PRKCB,ABCC8,CACNA1E,KCNJ18,CEMIP,PARK7,OAZ2,ADCYAP1R1,MEF2C,OCN,SHISA6,DIAPH1,NOS1AP,FYN,SCN8A,NALCN,HECW2,GRM5,PID1,ATPCKMT,KCNJ6,DPP6,EPHB2,TSPAN13,STXBP4,CACNG3,ATG5,VMP1,SLC1A2,KCNIP4,TRDN,NLGN1,NOS1,ASIC2,KCNQ5,CACNA2D1,HTT,CCR2,CATSPER2,RGS7,KCNAB1,PRKAG2                                                                                                                                                                                                                                   |
| GO:0010648 | negative regulation of cell communication | 0.0002027369517962256  | MTOR,WWC1,PTPRD,SLC24A2,NLK,ZNF536,DLC1,RIPOR2,PDE4D,STXBP1,BCL2,PRDM16,FBN1,SPRED1,MINAR1,ERBIN,MLLT3,APC,ARHGAP24,PTPRJ,EGFR,PRKACB,RGS3,NCOR1,NEDD4,SCAI,GRIK3,DKK2,MAPKBP1,DGKI,INVS,GRIA1,LRP2,RUNX2,TAOK3,ONECUT1,STAU2,USP18,ARHGAP44,NDUFAF2,CD2AP,PTPRR,KANK1,HOMER2,RGS2,PDE10A,KICS2,PRKC2,GRB10,RGS9,HECW1,DUSP22,YAP1,ZNRF3,STK38,SORCS3,PAFAH1B1,NF2,CTNNA1,BIRC6,PPARA,PAK5,SLC24A4,SEC14L1,ALPK2,DUSP16,SMARCA4,MAPKAP1,TNR,PTPRT,ABL1,PTPN12,PRKAA1,RAP1A,FGF10,GRID2,LATS2,NRG1,ZNF675,NXN,WNK2,FBN2,CD44,RGS12,PTPRO,PDE3A,LIMD1,SPRED2,PTPN2,LTBP1,OPRM1,HTR2A,KREMEN1,FHL2,HIPK3,EPN2,GRK3,MOSMO,CRIM1,PRR5L,LDLRAD4,NPHP4,BMP2,RANBP9,TMEM161A,LEMD3,ARHGAP42,FGF9,DRAXIN,SLAMF1,GLI3,SNX6,CNKSR3,GRIK2,CYLD,MAPK8IP1,UBASH3A,UBR1,RCAN1,DAB1,RB1CC1,PTPRE,PRKN,MTMR2,TBX20,NLRC5,SNX25,SHANK2,SOX30,LYN,OVOL2,RNF152,OTUD7A,YTHDF3,SNAI2,ASH1L,BID,SLAH2,TRABD2B,UFD1,SAMHD1,ENPP1,NDRG2,CSNK2A1,BMP5,BCL2L1,HCN1,GRB14,DHRS3,CELF4,PRAME,TNN,BANK1,IL10,SOSTDC1,PRKAA2,ITPRIP,YB |

|            |                                  |                        |                                                                                                                                                                                                                                                                                                                                                                                                                                                                                                                                                                                                                                                                                                                                                                                                                                                                                                                                                                                                                                                                                                                                                                                                                                                                                                                                                                                                                                                                                                                                   |
|------------|----------------------------------|------------------------|-----------------------------------------------------------------------------------------------------------------------------------------------------------------------------------------------------------------------------------------------------------------------------------------------------------------------------------------------------------------------------------------------------------------------------------------------------------------------------------------------------------------------------------------------------------------------------------------------------------------------------------------------------------------------------------------------------------------------------------------------------------------------------------------------------------------------------------------------------------------------------------------------------------------------------------------------------------------------------------------------------------------------------------------------------------------------------------------------------------------------------------------------------------------------------------------------------------------------------------------------------------------------------------------------------------------------------------------------------------------------------------------------------------------------------------------------------------------------------------------------------------------------------------|
|            |                                  |                        | X3,PBLD,PEG10,TWIST1,UFL1,NFKBIA,PRKCB,ABCC8,BRD4,ITGA6,OTOP1,CIDEA,SLC6A1,STAT1,BRMS1L,DGKG,PARK7,MYOCD,RBPMS2,C16ORF72,PDE2A,WWOX,NCK1,PPP2R3A,EPHA4,MECOM,SHISA6,IL17RD,ANKRD6,ARHGAP12,AMFR,BICD1,RBMS3,HDAC2,ZFYVE28,APELA,TET1,CDH2,PHLPP1,GRM5,TBC1D1,PI D1,NRP1,FAIM,ITGA1,MCC,RGS6,FBLN1,BMPER,PRDM15,EPHB2,CD38,EYA4,MET,MAGI2,KALRN,MFHAS1,BMP7,DLG5,ZMYND11,TMEM25,ABL2,EYA1,SLIT2,CNOT7,ROBO1,PRKCQ,SORCS2,S LIT3,ESR1,HTT,EYA2,RORA,RGS8,HERPUD1,RGS7,KIF7,FSTL4,STK3,DEPTOR,APCDD1,IGF1R,GLI2                                                                                                                                                                                                                                                                                                                                                                                                                                                                                                                                                                                                                                                                                                                                                                                                                                                                                                                                                                                                                      |
| GO:0050890 | cognition                        | 0.0002045093337383042  | PLCB1,CHRNA7,PJA2,CNTNAP2,EGFR,BTBD9,TUSC3,DGKI,GRI A1,SLC8A3,ADGRB3,APP,NTF3,TAF2A2,KCNK10,PRKCZ,BRINP1,MAPK1,NIPBL,SORCS3,PAFAH1B1,MEIS2,SYNJ1,PAK5,DNAH11,SCN2A,TANC1,TNR,ELAVL4,ABL1,SLC1A1,CAMK4,RASGRF1,MUSK,ATP8A1,HTR2A,TMOD2,RELN,BBS4,DOP1B,RCAN1,PRKN,GRIN2A,ATXN1,SHANK2,INSR,GRIN2B,LMX1A,ACTR2,NRXN1,A BCC8,NEDD9,SLC6A1,CSMD1,MEF2C,S100B,FOXO6,GABRA5,NT RK2,CYFIP1,UBE3A,AMFR,FYN,ITGA8,GRM5,NRXN3,RAG1,DGC R2,EPHB2,SPECC1,KALRN,GNAS,HTT,FOXB1,HRH1                                                                                                                                                                                                                                                                                                                                                                                                                                                                                                                                                                                                                                                                                                                                                                                                                                                                                                                                                                                                                                                            |
| GO:0060996 | dendritic spine development      | 0.00026467118589628774 | DOCK10,STAU2,ARHGAP44,SRGAP2C,PAK3,DNM3,DIP2A,PAFAH1B1,CTNND2,IQSEC1,PDLIM5,DISC1,RELN,SRGAP2,NGEF,TAN C2,ACTR2,MEF2C,WNT7A,FOXO6,EPHA4,UBE3A,ASAP1,HDAC2,EPHB1,SDK1,EPHB2,PPFIA2,KALRN,DLG5,NLGN1,FSTL4                                                                                                                                                                                                                                                                                                                                                                                                                                                                                                                                                                                                                                                                                                                                                                                                                                                                                                                                                                                                                                                                                                                                                                                                                                                                                                                          |
| GO:0023057 | negative regulation of signaling | 0.0002769072908582638  | MTOR,WWC1,PTPRD,SLC24A2,NLK,ZNF536,DLC1,RIPOR2,PDE4D,STXBP1,BCL2,PRDM16,FBN1,SPRED1,MINAR1,ERBIN,MLLT3,APC,ARHGAP24,PTPRJ,EGFR,PRKACB,RGS3,NCOR1,NEDD4,SCAI,GRIK3,DKK2,MAPKBP1,DGKI,INVS,GRIA1,LRP2,RUNX2,TA OK3,ONECUT1,STAU2,USP18,ARHGAP44,NDUFAF2,CD2AP,PTPR R,KANK1,HOMER2,RGS20,PDE10A,KICS2,PRKCZ,GRB10,RGS9,HECW1,DUSP22,YAP1,ZNRF3,STK38,SORCS3,PAFAH1B1,NF2,C TNN1,BIRC6,PPARA,PAK5,SLC24A4,SEC14L1,ALPK2,DUSP16,SMARCA4,MAPKAP1,TNR,PTPRT,ABL1,PTPN12,PRKAA1,RAP1A,FGF10,GRID2,LATS2,NRG1,ZNF675,NXN,WNK2,FBN2,CD44,R GS12,PTPRO,PDE3A,LIMD1,SPRED2,PTPN2,LTBP1,OPRM1,HTR 2A,KREMEN1,FHL2,HIPK3,EPN2,GRK3,MOSMO,CRIM1,PRR5L,L DLRAD4,NPHP4,BMP2,RANBP9,TMEM161A,LEMD3,ARHGAP42,FG F9,DRAXIN,SLAMF1,GLI3,SNX6,CNKSR3,GRIK2,CYLD,MAPK8I P1,UBASH3A,UBR1,RCAN1,DAB1,RB1CC1,PTPRE,PRKN,MTMR2, TBX20,NLRC5,SNX25,SHANK2,SOX30,LYN,OVOL2,RNF152,OTU D7A,YTHDF3,SNAI2,ASH1L,BID,SLAH2,TRABD2B,UFD1,SAMHD 1,ENPP1,NDRG2,CSNK2A1,BMP5,BCL2L1,HCN1,GRB14,DHRS3, CELF4,PRAME,TNN,BANK1,IL10,SOSTDC1,PRKAA2,ITPRIP,YB X3,PBLD,PEG10,TWIST1,UFL1,NFKBIA,PRKCB,ABCC8,BRD4,ITGA6,OTOP1,CIDEA,SLC6A1,STAT1,BRMS1L,DGKG,PARK7,MYOCD,RBPMS2,C16ORF72,PDE2A,WWOX,NCK1,PPP2R3A,EPHA4,MECOM,SHISA6,IL17RD,ANKRD6,ARHGAP12,AMFR,BICD1,RBMS3,HDAC2,ZFYVE28,APELA,TET1,CDH2,PHLPP1,GRM5,TBC1D1,PI D1,NRP1,FAIM,ITGA1,MCC,RGS6,FBLN1,BMPER,PRDM15,EPHB2,CD38,EYA4,MET,MAGI2,KALRN,MFHAS1,BMP7,DLG5,ZMYND11,TMEM25,ABL2,EYA1,SLIT2,CNOT7,ROBO1,PRKCQ,SORCS2,S LIT3,ESR1,HTT,EYA2,RORA,RGS8,HERPUD1,RGS7,KIF7,FSTL4,STK3,DEPTOR,APCDD1,IGF1R,GLI2 |
| GO:0097061 | dendritic spine organization     | 0.0002981108447178989  | CHRNA7,DOCK10,STAU2,ARHGAP44,PAK3,DNM3,DIP2A,PAFAH1B1,TANC1,CTNND2,PDLIM5,RELN,MTMR2,NGEF,INSR,TANC2,G RIN2B,ACTR2,NEDD9,WNT7A,EPHA4,UBE3A,FYN,EPHB1,EPHB2,PPFIA2,KALRN,NLGN1,IGF1R                                                                                                                                                                                                                                                                                                                                                                                                                                                                                                                                                                                                                                                                                                                                                                                                                                                                                                                                                                                                                                                                                                                                                                                                                                                                                                                                               |
| GO:0007265 | Ras protein signal transduction  | 0.0002981206310161855  | NOTCH2,KSR1,DLC1,RIPOR2,RDX,RALA,CDC42EP3,AUTS2,ERB IN,CRKL,ARHGAP24,DENND1A,SCAI,DGKI,PRKD1,CTNNAL1,RALGPS1,RAPGEF2,RAPGEF5,MAPRE2,ARHGAP44,KANK1,MAP4K4,ITPKB,RASGRF2,RGL1,TIAM1,ARHGEF12,USP8,MAPKAP1,ABL1,RAP1A,FGF10,NRG1,RASGRF1,DENND4C,MCF2L,PLCE1,IQSEC1,ARHGAP42,PSD3,KITLG,ALS2,ARHGEF28,RALB,ROCK1,NTN1,ARFGEF1,RALGPS2,RASGRP1,CSF1,RASGEF1C,PTH,RAB12,NE T1,MADD,ARFGEF3,PARK7,RAPGEF4,SDCBP,CYTH4,CYFIP1,RA                                                                                                                                                                                                                                                                                                                                                                                                                                                                                                                                                                                                                                                                                                                                                                                                                                                                                                                                                                                                                                                                                                        |

|            |                                              |                        |                                                                                                                                                                                                                                                                                                                                                                                                                                                                                                                                                                                                                                                                                                                                                                                                                                                                                                                                                                                                                                                                                                           |
|------------|----------------------------------------------|------------------------|-----------------------------------------------------------------------------------------------------------------------------------------------------------------------------------------------------------------------------------------------------------------------------------------------------------------------------------------------------------------------------------------------------------------------------------------------------------------------------------------------------------------------------------------------------------------------------------------------------------------------------------------------------------------------------------------------------------------------------------------------------------------------------------------------------------------------------------------------------------------------------------------------------------------------------------------------------------------------------------------------------------------------------------------------------------------------------------------------------------|
|            |                                              |                        | <i>SGEF1B,CNKSR1,GPR55,NRP1,BCR,ELMO1,RERG,RRAS2,EPHB2,MET,CDH13,ABL2,ROBO1,ARHGEF11,MYO9B,STARD13,EPS8,ROCK2,AKAP13</i>                                                                                                                                                                                                                                                                                                                                                                                                                                                                                                                                                                                                                                                                                                                                                                                                                                                                                                                                                                                  |
| GO:0099175 | regulation of postsynaptic organization      | 0.0003070621783466111  | <i>PTPRD,LRFN2,NTRK3,EPHA7,STAU2,ARHGAP44,PAK3,DNM3,PAFAH1B1,TANC1,GRID2,DGKB,ABHD17C,PDLIM5,RELN,NGEF,TANC2,GRIN2B,ACTR2,NRXN1,NEDD9,WNT7A,EPHA4,IL1RAPL1,UBE3A,FYN,CDH2,EPHB2,PPFIA2,KALRN,NLGN1</i>                                                                                                                                                                                                                                                                                                                                                                                                                                                                                                                                                                                                                                                                                                                                                                                                                                                                                                    |
| GO:0051093 | negative regulation of developmental process | 0.0003971527372974687  | <i>CNTN4,WWC1,ULK2,ZNF536,TAF4A,ZFPM2,BCL2,FBN1,ROBO2,ZEB1,RARB,SPRED1,USH2A,MINAR1,FOXJ2,EGFR,CDK12,BCL11A,SOX6,TMEM182,NTRK3,EPHA7,RAPGEF2,ADGRB3,COL4A2,APP,SEMA5A,SRGAP2C,KANK1,DIP2B,ITPKB,TRPC5,DNM3,ABCA5,YAP1,BRINP1,MAPK1,GABPA,FAT3,EFEMP1,NF2,CTNNA1,PPARA,MEIS2,NFIB,PRTG,SEMA3C,ALPK2,JARID2,ADGRV1,BBS2,WNT9B,RANBP3L,SEMA6D,SMARCA4,TNR,CXADR,HDAC4,GLIS1,FGF10,ASPM,ZBTB16,ZNF675,TRIO,LIMD1,SPRED2,PTPN2,KREMEN1,SEMA3E,ANKRD17,LUC7L,EPN2,BICRAL,MBP,CRIM1,LDLRAD4,SEMA3A,BMP2,RC3H2,SEMA3D,HMGB1,FGF9,NFATC2,ANKRD26,RAP1GAP,DRAKIN,SMARCA2,GLI3,SMARCC1,MAP2,ATF2,COL5A1,DCC,GTTF2I,RORB,DAB1,PRKN,NGEF,ROCK1,LYN,DTX1,OVOL2,NTN1,ZFH3,DPYSL5,SNAI2,TWIST2,ENPP1,BMP5,BCL2L1,CTDP1,CNMD,ABCG1,PRAME,TNN,MED1,LMX1A,TMEM178A,PRAMEF25,PTH,SOSTDC1,ANP32B,YBX3,TWIST1,MELTF,NFKBIA,ABCC8,AGO1,STAT1,BRMS1L,PRAMEF2,MYOCD,ADGRB1,WNT7A,RBPMS2,NDFIP1,EPHA4,ADAMTS9,IL17RD,CLDN18,UBE3A,SEMA4D,RUNX1,ASAP1,GPR55,HDAC2,TET1,GPR137B,EPHB1,ADCK1,NRP1,RC3H1,BCR,FBLN1,EPHB2,MYB,GNAS,BMP7,DDX6,PBX1,NLGN1,EFNA5,LOXL2,CCR2,SEMA4B,ROCK2,RORA,HSPG2,COL4A3,HOOK3,FSTL4,STK3,HNRNPU,GLI2</i> |
| GO:0040017 | positive regulation of locomotion            | 0.00040365709846534566 | <i>MTOR,RIPOR2,RDX,BCL2,CARMIL1,RIN2,ANO6,APC,DSCAM,CRKL,EGFR,ANGPT1,NTRK3,FLT1,PRKD1,PAK1,RAPGEF2,ONECUT1,ADAM10,HDAC9,IL1R1,APP,DOCK8,MAPRE2,SEMA5A,NTF3,SLC8A1,SRGAP2C,MAP4K4,PAK3,MAPK1,MGAT5,PDGFD,NIPBL,TIAM1,SEMA3C,AGO2,IL34,BCAS3,SYNE2,SEMA6D,DOCK4,ABL1,HDAC4,FGF10,PRKCE,EGF,ARHGEF7,ATP8A1,SEMA3E,DOCK5,TJP1,IQSEC1,SEMA3A,BMP2,SEMA3D,RELN,HMGB1,FGF9,DOCK1,SLAMF1,ETS1,SMOC2,KITLG,IL6R,LYN,NTN1,INSR,SNAI2,JCAD,TWIST2,CSF1,ROR2,TWIST1,AKT3,JAK2,NEDD9,ITGA6,CEMIP,CCBE1,ITGA4,WNT7A,SDCBP,FGR,EPHA4,NUMB,FBXO31,PTK2,CDH5,DIAPH1,LAMB1,SEMA4D,JAM2,WNT5B,PPM1F,APELA,NRP1,PRKCA,FBLN1,RRAS2,EPHB2,MET,CDH13,BMP7,PDGFC,ABL2,SLIT2,CAMK1D,PIK3R3,FER,CCR2,SEMA4B,ROCK2,IL16,WASHC1,IGF1R,DNM1L</i>                                                                                                                                                                                                                                                                                                                                                                                       |
| GO:1901699 | cellular response to nitrogen compound       | 0.00040786091559944453 | <i>BCAR3,MTOR,NSG1,PLCB1,PTPRA,ITPR2,PDE4D,MYO5A,FBN1,CHRNA7,GABRB3,ZEB1,ALK,APC,CRKL,EGFR,BCL11A,GABRB1,GRIA1,CHRM3,RAPGEF2,CPS1,CPEB4,TMEM38B,RPTOR,GHR,HDAC9,APP,GABRG2,SLC8A1,KANK1,AKAP6,RAB8B,LARP1,RAP1GDS1,PRKCZ,GRB10,RYR3,MAPK1,HRH2,PDGFD,SPIDR,GABPA,HRH4,GLP2R,CTNNA1,AKAP9,KLF15,RYR2,MBD5,ATRX,ABL1,SLC1A1,PRKAA1,RAP1A,DENND4C,PDE3A,PTPN2,HTR2C,OPRM1,HR2A,GNAL,CCND3,BLM,SOGA1,TBC1D4,GNAQ,ZNF106,CGAS,SMARCC1,SNX6,IDE,ATF2,UMODL1,CFTR,UBR1,CHRM5,SLC30A10,SELENON,PTPRE,PRKN,RALB,ROCK1,LYN,VCAM1,RRAGD,ARID1B,INSR,ENPP1,BCL2L1,HCN1,GRB14,KL,ACTR2,JAK2,PRKCB,ATP2B1,ASS1,OTOP1,STAT1,IMPACT,ITGA4,MEF2C,MAP3K5,OR10H2,PDE2A,NCK1,EPHA4,NTRK2,COLEC12,PTK2,DIAPH1,CYFIP1,FYN,HDAC2,GRM5,PID1,POR,NSG2,GNA14,EPHB2,STXBPA,SLC1A2,GNAS,PDGFC,SLIT2,PRKCQ,CACNA2D1,PIK3R3,FER,HRH1,ROCK2,RGS8,RAB31,GNG2,PNPLA3,IGF1R</i>                                                                                                                                                                                                                                                             |
| GO:0071417 | cellular response to organonitr              | 0.00041110927827377864 | <i>BCAR3,MTOR,NSG1,PLCB1,PTPRA,ITPR2,PDE4D,MYO5A,FBN1,GABRB3,ZEB1,ALK,APC,EGFR,BCL11A,GABRB1,CHRM3,RAPGEF2,CPS1,CPEB4,TMEM38B,RPTOR,GHR,HDAC9,APP,GABRG2,SLC8A1,KANK1,AKAP6,RAB8B,LARP1,RAP1GDS1,PRKCZ,GRB10,RYR3,MAPK1,HRH2,PDGFD,SPIDR,GABPA,HRH4,GLP2R,CTNNA1,A</i>                                                                                                                                                                                                                                                                                                                                                                                                                                                                                                                                                                                                                                                                                                                                                                                                                                    |

|            |                                           |                        |                                                                                                                                                                                                                                                                                                                                                                                                                                                                                                                                                                                                                                                                                                                                                                                                                                                                                                                                                                                                                                                                                                                                                                       |
|------------|-------------------------------------------|------------------------|-----------------------------------------------------------------------------------------------------------------------------------------------------------------------------------------------------------------------------------------------------------------------------------------------------------------------------------------------------------------------------------------------------------------------------------------------------------------------------------------------------------------------------------------------------------------------------------------------------------------------------------------------------------------------------------------------------------------------------------------------------------------------------------------------------------------------------------------------------------------------------------------------------------------------------------------------------------------------------------------------------------------------------------------------------------------------------------------------------------------------------------------------------------------------|
|            | ogen compound                             |                        | KAP9,KLF15,RYR2,MBD5,ABL1,SLC1A1,PRKAA1,RAP1A,DENND4C,PDE3A,PTPN2,HTR2C,OPRM1,HTR2A,GNAL,CCND3,BLM,SOGA1,TBC1D4,ZNF106,SMARCC1,SNX6,IDE,ATF2,UMODL1,CFTR,UBR1,CHRM5,SLC30A10,SELENON,PTPRE,PRKN,ROCK1,LYN,VCAM1,RRAGD,ARID1B,INSR,ENPP1,BCL2L1,HCN1,GRB14,KL,ACTR2,JAK2,PRKCB,ATP2B1,ASS1,OTOP1,STAT1,IMPACT,ITGA4,MEF2C,OR10H2,PDE2A,NCK1,EPHA4,NTRK2,PTK2,DIAPH1,CYFIP1,FYN,HDAC2,GRM5,PID1,POR,NSG2,GNA14,EPHB2,STXBP4,SLC1A2,GNAS,PDGFC,SLIT2,PRKCQ,CACNA2D1,PIK3R3,FER,HRH1,ROCK2,RGS8,RAB31,GNG2,PNPLA3,IGF1R                                                                                                                                                                                                                                                                                                                                                                                                                                                                                                                                                                                                                                                   |
| GO:0051345 | positive regulation of hydrolase activity | 0.0004444433590193902  | BCAR3,MTOR,GARNL3,MYO9A,DLC1,EGLN3,CRKL,ARHGAP24,DOCK10,EGFR,DENND1A,NTRK3,FLT1,PRKD1,RALGPS1,RAPGEF2,RALGAP1,RAPGEF5,APP,DOCK8,MAPRE2,NTF3,ACER2,ST18,MAP4K4,RAP1GDS1,IFT57,PRKCZ,RABGAP1L,TBC1D22A,CHN1,RASGRF2,RGL1,TIAM1,ARAP2,DAPK1,TBC1D9,BCAS3,CLPX,TBC1D5,SLC1A1,RAP1A,RASGRF1,ASAP2,ARHGEF7,HTR2A,MBP,HIP1,VAV1,IQSEC1,BMP2,EVI5,RALGAP2,SGSM1,TBC1D4,ARHGAP42,HMGB1,GNAQ,RAP1GAP,SRGAP2,TBC1D13,NGEF,GRIN2A,ALS2,DOCK9,ROCK1,LYN,BID,RALGPS2,RASGRP1,SNX9,GRIN2B,PSAP,RASGEF1C,PTH,ANP32B,NET1,SIPA1L2,JAK2,PCNA,ZC3H15,NEDD9,ITGA6,MAPK8,ADCYAP1R1,RAPGEF4,CYFIP2,MEF2C,MAP3K5,EPHA4,SEMA4D,RASGEF1B,ASAP1,GPR55,FYN,PPM1F,TBC1D1,ITGA1,BCR,RGS6,FBLN1,BCL2L13,MAGI2,KALRN,GNAS,TIAM2,WDR41,ABL2,ROBO1,ANTXR1,SIPA1L3,ESR1,ROCK2,RGS8,COL4A3,RGS7,RSU1                                                                                                                                                                                                                                                                                                                                                                                                     |
| GO:0010243 | response to organonitrogen compound       | 0.0004500978155581418  | BCAR3,MTOR,NSG1,PLCB1,PTPRA,ITPR2,PDE4D,MYO5A,FBN1,CHRNA7,PIK3C3,GABRB3,ZEB1,ALK,ERBIN,HLCS,APC,TNIF,EGFR,USP14,BCL11A,PSMB2,GABRB1,CHRM3,ADSS2,RAPGEF2,CPS1,CPEB4,TMEM38B,BCKDHB,RPTOR,GHR,HDAC9,APP,KYNU,GABRG2,SLC8A1,ECPAS,KANK1,AKAP6,HOMER2,RAB8B,LARP1,RAP1GDS1,RNLS,PRKCZ,GRB10,RYR3,MAPK1,HRH2,SGTB,USP25,PDGFD,SPIDR,GABPA,HRH4,GLP2R,ATF6,CTNNA1,AKAP9,KLF15,PPARA,SLC24A4,VPS13C,RYR2,EFTUD2,MBD5,ELAVL4,ABL1,SLC1A1,PRKAA1,RAP1A,PRKCE,DENND4C,ABCC9,P2RX6,PDE3A,EXT1,PTPN2,ATXN3,HTR2C,OPRM1,HTR2A,TMEM67,ALPL,GNAL,CCND3,BLM,SOGA1,GNAI1,TBC1D4,ZNF106,ATF1,SMARCC1,SNX6,IDE,ATF2,UMODL1,CFTR,UBR1,CHRM5,SLC30A10,SELENON,PTPRE,PRKN,GRIN2A,ROCK1,LYN,VCAM1,SEL1L,EIF2B3,RRAGD,ARID1B,CRACR2A,INSR,TFF1,UFD1,CD9,ENPP1,KCNC1,BCL2L1,HCN1,GRB14,HADHA,PPP2R2A,KL,IL10,ACTR2,SREBF2,JAK2,PCNA,UFL1,NFKBIA,PRKCB,ABCC8,ATP2B1,ASS1,ERLIN2,OTOP1,SLC6A1,STAT1,MARCHF6,IMPACT,ITGA4,UBE2J2,MEF2C,OR10H2,PDE2A,NCK1,EPHA4,NTRK2,PTK2,DIAPH1,CYFIP1,UBE3A,AMFR,FYN,HDAC2,SEL1L2,GRM5,PID1,SDK1,POR,NSG2,GNA14,EPHB2,CDH13,STXBP4,SLC1A2,GNAS,BMP7,PDGFC,SLIT2,PRKCQ,MGMT,SLC6A3,GLDC,CACNA2D1,PIK3R3,FER,HRH1,ROCK2,RGS8,RAB31,HERPUD1,RGS7,GNG2,PNPLA3,IGF1R |
| GO:0007043 | cell-cell junction assembly               | 0.00045262914769690605 | TLN2,CDH8,CNTNAP2,APC,PATJ,EPB41L3,TBCD,VCL,CTNNA1,CDH7,ANK2,CDH11,PARD3,CDH18,CDHR3,PTPRO,CTNND2,CDH20,TJP1,NPHP4,STRN,PRKCH,PKP1,ROCK1,SNAI2,CD9,MICALL2,HIPK1,PKN2,DSG1,OCLN,CDH5,CLDN18,MPP7,CDH9,CDH2,PRKCA,CDH12,EPHB2,DLG5,FER,ROCK2,CLDN10                                                                                                                                                                                                                                                                                                                                                                                                                                                                                                                                                                                                                                                                                                                                                                                                                                                                                                                    |
| GO:0030001 | metal ion transport                       | 0.00048420216392044155 | CACNA2D3,SLC17A1,SLC24A2,KCNH5,MICU2,DPP10,ITPR2,PDE4D,BCL2,KCNMA1,CHRNA7,ANO6,CACNG2,SLC4A10,NEDD4,ATP2B2,TUSC3,SLC39A12,SLC8A3,PRKD1,LRP2,FGF12,TMEM38B,SLC24A3,THADA,NEDD4L,TRPM1,SLC39A11,CACNA1C,CACNB2,TMC1,SLC8A1,KCNE4,AKAP6,HOMER2,KCNK10,TRPC5,RYR3,HECW1,KCNJ1,TRPC7,NIPAL2,MICU1,LRR38,AKAP9,KCNS3,SLC24A4,SCN2A,ANK2,RYR2,SLC9C1,NKAIN3,ABL1,SLC1A1,SLC12A8,KCNH1,NKAIN2,ABCB7,PRKCE,SLMAP,WNK2,EGF,ABCC9,HTR2C,ALG10B,OPRM1,HTR2A,CYBRD1,CNNM4,STAC,MAIP1,KCND2,AFG3L2,ANK3,NIPA2,TMEM163,CNTN1,CACNA1I,KCNJ15,SLC10A7,SCN11A,NETO2,SLC23A2,SLC39A6,KCNH8,SLC9A4,CNKS3,SLC30A10,SELENON,HEPH1,GRIN2A,JPH1,TRPM6,CDH23,SLC12A1,KCNQ3,SLC4A4,SCN10A,KCND3,KCNN3,LYN,SLC1                                                                                                                                                                                                                                                                                                                                                                                                                                                                                  |

|            |                                                   |                       |                                                                                                                                                                                                                                                                                                                                                                                                                                                                                                                                                                                                                                                                                                                                                                                                                                                                                                                                                                                                                                                                         |
|------------|---------------------------------------------------|-----------------------|-------------------------------------------------------------------------------------------------------------------------------------------------------------------------------------------------------------------------------------------------------------------------------------------------------------------------------------------------------------------------------------------------------------------------------------------------------------------------------------------------------------------------------------------------------------------------------------------------------------------------------------------------------------------------------------------------------------------------------------------------------------------------------------------------------------------------------------------------------------------------------------------------------------------------------------------------------------------------------------------------------------------------------------------------------------------------|
|            |                                                   |                       | 3A5, CRACR2A, CUL5, PLPP4, ZDHHC17, UTRN, KCNC1, HCN1, GRIN2B, KCNK5, SLC40A1, SLC5A12, MELTF, TRPV5, PRKCB, ABCC8, CACNA1E, ATP2B1, SLC6A1, NDFIP2, SHROOM2, SLC6A11, KCNJ18, CEMIP, CBLIF, ADCYAP1R1, EFHB, NDFIP1, SLC5A9, SLC10A6, NECN1, FLVCR1, TRPM7, IREB2, DIAPH1, SCARA5, PLCZ1, NOS1AP, SLC9A5, SLC5A1, FYN, SCN8A, NCS1, NALCN, TRPM3, SLC39A8, HE CW2, KCNJ6, DPP6, TSPAN13, CACNG3, ATG5, VMP1, KCNIP4, TRDN, NOS1, SLC6A3, ASIC2, KCNQ5, CACNA2D1, HTT, IL16, CATSPER2, RGS7, SLC13A4, KCNAB1, DNM1L                                                                                                                                                                                                                                                                                                                                                                                                                                                                                                                                                     |
| GO:2000147 | positive regulation of cell motility              | 0.0005070603850326129 | MTOR, RIPOR2, RDX, BCL2, CARMIL1, RIN2, ANO6, APC, CRKL, EGF R, ANGPT1, NTRK3, FLT1, PRKD1, PAK1, RAPGEF2, ONECUT1, ADAM10, HDAC9, IL1R1, APP, DOCK8, MAPRE2, SEMA5A, NTF3, SLC8A1, SRGAP2C, MAP4K4, PAK3, MAPK1, MGAT5, PDGFD, NIPBL, TIAM1, SEMA3C, AGO2, IL34, BCAS3, SYNE2, SEMA6D, DOCK4, ABL1, HDAC4, FGF10, PRKCE, EGF, ARHGEF7, ATP8A1, SEMA3E, DOCK5, TJP1, IQSEC1, SEMA3A, BMP2, SEMA3D, RELN, HMGB1, FGF9, DOCK1, SLAMF1, ETS1, SMOC2, KITLG, IL6R, LYN, NTN1, INSR, SNAI2, JCAD, TWIST2, CSF1, ROR2, TWIST1, AKT3, JAK2, NEDD9, ITGA6, CEMIP, CCBE1, ITGA4, WNT7A, SDCBP, FGR, EPHA4, NUMB, FBXO31, PTK2, CDH5, DIAPH1, LAMB1, SEMA4D, JAM2, WNT5B, PPM1F, APELA, NRP1, PRKCA, FBLN1, RRAS2, EPHB2, MET, CDH13, BMP7, PDGFC, ABL2, CAMK1D, PIK3R3, FER, CCR2, SEMA4B, ROCK2, WASHC1, IGF1R, DNM1L                                                                                                                                                                                                                                                           |
| GO:0060078 | regulation of postsynaptic membrane potential     | 0.000553932763618564  | CHRNA7, RIMS1, RIMS2, GRIK3, GABRB1, DGKI, GRIA1, SLC8A3, GABRA6, APP, GABRG2, PRKCZ, GRIK4, GRM1, GABRG1, TMEM108, GRID2, P2RX6, OPRM1, KCND2, RELN, UNC13B, GABRR2, GRIK2, MTMR2, GRIN2A, GRID1, GABRG3, IGSF11, GRIN2B, CELF4, NRXN1, MEF2C, WNT7A, GABRA5, GRIK1, GRM5, GABRA2, TMEM25, NLGN1                                                                                                                                                                                                                                                                                                                                                                                                                                                                                                                                                                                                                                                                                                                                                                       |
| GO:0018209 | peptidyl-serine modification                      | 0.0006180306852110503 | BCAR3, MTOR, ULK2, NLK, PDE4D, BCL2, GALNT1, EGFR, ANGPT1, NTRK3, PRKD1, PAK1, SMYD3, RPTOR, APP, RPS6KA2, DLC1, NTF3, AURKA, PRKCZ, MAPK1, GALNT16, STK38, TLK1, AKAP9, STK32B, MAPKAP1, SLC1A1, PRKAA1, MAST4, CAMK4, LATS2, PRKCE, CD44, RPS6KA3, STK38L, MARK2, HIPK3, CLSPN, STK32A, EGFLAM, GALNT13, VRK1, CNKSR3, PRKCH, MKNK1, ROCK1, NEK6, CSNK2A1, NRXN1, HIPK1, AKT3, TNKS, PRKCB, MAST2, PARK7, MAPK8, PKN2, NCK1, TOP1, NTRK2, PPM1F, SH2D3C, MAPK9, GALNT2, RPS6KA5, PRKCA, CSNK1G1, CAMK1G, PRKCQ, NOS1, NSD1, CAMK1D, SPOCK3, ROCK2, MORC3                                                                                                                                                                                                                                                                                                                                                                                                                                                                                                              |
| GO:0051962 | positive regulation of nervous system development | 0.0006182582187643645 | MTOR, PTPRD, TENM4, ROBO2, DSCAM, MACF1, BCL11A, CDH4, SPEN, LRP2, ADGRB3, STAU2, SEMA5A, PAK3, TRPC5, PAFAH1B1, SYNJ1, TIAM1, IL34, GRID2, ASPM, PLXNA2, OPRM1, LINGO2, DISC1, BMP2, RELN, NIN, GLI3, PRKCH, LYN, NTN1, IL33, ACTR2, CLSTN2, MAP6, NRXN1, UFL1, ADGRB1, WNT7A, FBXW8, EPHA4, NTRK2, IL1RAPL1, NUMB, FBXO31, CYFIP1, SEMA4D, ADGRL2, HDAC2, EPHB1, GRM5, NRP1, FAIM, CHODL, CUX1, EPHB2, FLRT2, KALRN, TIAM2, DLG5, SLIT2, SYNDIG1, ROBO1, NLGN1, ASIC2, EFNA5                                                                                                                                                                                                                                                                                                                                                                                                                                                                                                                                                                                          |
| GO:0030155 | regulation of cell adhesion                       | 0.0006350488405771256 | SPOCK1, DLC1, ZDHHC21, PTPRA, RIPOR2, RDX, BCL2, TENM3, CARMIL1, RIN2, HHLA2, DSCAM, CRKL, ILDR2, PTPRJ, ANGPT1, MACF1, EPHA7, ONECUT1, CCL28, TBCD, ADAM10, DOCK8, SEMA5A, VCL, ACER2, KANK1, MAP4K4, ITPKB, PRKCZ, DUSP22, ADAM22, PLG, CORO2B, LIMCH1, FMN1, TPM1, NF2, PPARA, MAGI1, BCAS3, SMARCA4, BLK, TNF, NUA1, ABL1, APBB1IP, NFAT5, MYO10, PEAK1, NRG1, AP3B1, ZBTB16, PRKCE, CD44, PTPRO, PTPN2, PLXNA2, ATXN3, ARHGEF7, AMBRA1, SEMA3E, ANK3, EMILIN2, DOCK5, MBP, FUT9, VAV1, TJP1, EGFLAM, DISC1, WDPCP, BMP2, RC3H2, HMGB1, DOCK1, SLAMF1, SMARCA2, ETS1, GLI3, SMARCC1, LAMC1, KITLG, DAB1, VAV3, ROCK1, LYN, VCAM1, DTX1, ZFH3, ARID1B, SNAI2, CD9, UTRN, RASGRP1, CSF1, PRKG1, LAMA3, TNN, AJAP1, IL10, CD70, JAK2, CE LSR2, PRSS2, MELTF, NEDD9, OLFM4, ASS1, ADAMTS18, ITGA4, NDFIP1, SERPINI2, NCK1, EPHA4, MEGF10, PTK2, NFKBID, LAMB1, PCDH8, SEMA4D, RUNX1, EDIL3, TNFSF11, FYN, PPM1F, CRTAM, NRP1, PRKCA, RC3H1, FBLN1, RAG1, EPHB2, CDH13, MYB, LAMA1, BMP7, DLG5, ABL2, IL20RB, PRKCQ, EFNA5, FRMD5, PRLR, CCR2, ROCK2, PPP1CB, RSU1, GLI2 |



|            |                                          |                       |                                                                                                                                                                                                                                                                                                                                                                                                                                                                                                                                                                                                                                                                                                                                                                                                                                                                                                                                                                                                                                                            |
|------------|------------------------------------------|-----------------------|------------------------------------------------------------------------------------------------------------------------------------------------------------------------------------------------------------------------------------------------------------------------------------------------------------------------------------------------------------------------------------------------------------------------------------------------------------------------------------------------------------------------------------------------------------------------------------------------------------------------------------------------------------------------------------------------------------------------------------------------------------------------------------------------------------------------------------------------------------------------------------------------------------------------------------------------------------------------------------------------------------------------------------------------------------|
| GO:0014706 | striated muscle tissue development       | 0.000638695379491689  | NOTCH2,MTOR,SGCD,NEBL,ZFPM2,TENM4,ALDH1A2,RARB,SOX6,LRP2,SLC8A1,AKAP6,YAP1,MYLK3,TPM1,PPARA,MRTFB,SEMA3C,ALPK2,JARID2,RYR2,CXADR,XIRP2,NRG1,PGM5,ALPK3,FHL2,LUC7L,SGCZ,MYLK2,PDLIM5,BMP2,PTCD2,FGF9,TBX20,BMP5,CTDP1,SMAD5,MED1,TWIST1,MTPN,MYO18B,ASB2,MYOCD,MEF2C,ADAMTS9,TNNI1,RUNX1,SORBS2,SGCG,ATG5,NRAP,BMP7,EYA1,FHOD3,ERBB4,EYA2,HNRNPU,AKAP13                                                                                                                                                                                                                                                                                                                                                                                                                                                                                                                                                                                                                                                                                                     |
| GO:0098662 | inorganic cation transmembrane transport | 0.0006434937532816875 | CACNA2D3,SLC17A1,SLC24A2,KCNH5,MICU2,DPP10,ITPR2,PD E4D,BCL2,KCNMA1,CHRNA7,ANO6,CACNG2,SLC4A10,NEDD4,ATP2B2,TUSC3,SLC39A12,SLC8A3,PRKD1,FGF12,TMEM38B,SLC24A3,THADA,NEDD4L,TRPM1,SLC39A11,CACNA1C,CACNB2,TMC1,SLC8A1,KCNE4,AKAP6,KCNK10,TRPC5,RYR3,HECW1,KCNJ1,TRPC7,NIPAL2,MICU1,LRR38,AKAP9,KCNS3,SLC24A4,SCN2A,ANK2,RYR2,SLC9C1,SLC36A1,ABL1,SLC1A1,SLC12A8,KCNH1,ABCB7,PRKCE,SLMAP,WNK2,ABCC9,HTR2C,ALG10B,OPRM1,HTR2A,CNNM4,STAC,MAIP1,KCND2,AFG3L2,ANK3,NIPA2,TMEM163,ATP6V1E1,CACNA1I,KCNJ15,SCN11A,NETO2,SLC39A6,KCNH8,SLC9A4,CNKS3,SLC30A10,SELENON,GRIN2A,JPH1,TRPM6,SLC12A1,KCNQ3,SLC4A4,SCN10A,KCND3,KCNH3,LYN,SLC15A2,CRACR2A,CUL5,COX5A,ZDHHC17,UTRN,KCNC1,HCN1,GRIN2B,CNK5,SLC40A1,COX7A2L,TWIST1,TRPV5,ABCC8,CACNA1E,ATP2B1,OTOP1,SLC6A1,SHROOM2,SLC6A11,KCNJ18,CEMP1,CBLIF,PARK7,ADCYAP1R1,ATP6V1C2,ATP6V1B2,TRPM7,DIAPH1,SCARA5,NOS1AP,SLC9A5,SLC5A1,FYN,SCN8A,NCS1,ATP5PF,NALCN,TRPM3,SLC39A8,HECW2,ATPSCMT,KCNJ6,DPP6,TSPAN13,ATP6V0D2,CACNG3,ATG5,VMP1,KCNIP4,TRDN,NOS1,SLC6A3,ASIC2,KCNQ5,CACNA2D1,HTT,SLC25A18,CATSPER2,RGS7,KCNAB1 |
| GO:0030010 | establishment of cell polarity           | 0.0006814627405619193 | WWC1,MYO9A,RIPOR2,SDCCAG8,MAP4,CRKL,DOCK2,CRB1,PATJ,DOCK8,KANK1,PRKCZ,MCPH1,PAFAH1B1,PARD3B,ALPK2,BCAS3,PARD3,ABL1,FGF10,MARK2,ANKFN1,WDPCP,UST,FRMD4A,ROCK1,ARFGEF1,FAT1,NDC80,WNT7A,PTK2,CDH5,MPP7,CRTAM,EPHB1,LAMA1,ABL2,SIPA1L3,ARHGEF11,FRMD4B,HTT,ROCK2,IGF1R                                                                                                                                                                                                                                                                                                                                                                                                                                                                                                                                                                                                                                                                                                                                                                                        |
| GO:0003013 | circulatory system process               | 0.0006816317124228458 | MTOR,SGCD,IMMP2L,ZDHHC21,PDE4D,KCNMA1,NAV2,ENPEP,PTPRJ,ANGPT1,CTNNA3,MYOF,FLI1,ATP2B2,SLC8A3,CHRM3,LRP2,FGF12,CPS1,TMEM38B,SLC24A3,SLC44A1,CELF2,NEDD4L,SLC7A2,RPS6KA2,CACNA1C,CACNB2,SLC8A1,KCNE4,RAP1GDS1,RNLS,YAP1,HRH2,SLC16A1,CORO2B,MYLK3,TPM1,CORIN,AKAP9,PPARA,ANK2,RYR2,BBS2,CXADR,DOCK4,ABL1,HDAC4,SLC1A1,SLC3A1,PTPRO,ABCC9,PDE3A,EXT1,LNPEP,SLC2A3,ATP8A1,ABCC4,HTR2A,CYP4A11,SLC2A13,NOS2,SGCZ,MYLK2,EMILIN2,DOCK5,F5,ECE1,TJP1,ARHGAP42,BBS4,TBX20,SLC4A4,SCN10A,KCND3,ROCK1,SLC15A2,INSR,HCN1,PRKG1,SMAD5,VSTM4,KL,JAK2,SVEP1,PTGS1,ABCC8,ATP2B1,EXT2,SLC6A1,STAT1,MAP2K6,PDE2A,TNNI1,OCLN,CDH5,NOS1AP,ADAMTS16,SLC5A1,FYN,APELA,ASB3,ITGA1,BCR,SGCG,CD38,ATG5,SLC1A2,SLIT2,TRHDE,TRDN,NOS1,ASIC2,CACNA2D1,HRH1,ROCK2,COL4A3,THRB,AKAP13,DNM1L                                                                                                                                                                                                                                                                                              |
| GO:0006812 | cation transport                         | 0.0007021715742743854 | UNC80,CACNA2D3,SLC17A1,SLC24A2,KCNH5,MICU2,PIEZO2,DPP10,ITPR2,PDE4D,SLC44A5,BCL2,KCNMA1,CHRNA7,ANO6,CACNG2,SLC4A10,NEDD4,ATP2B2,TUSC3,SLC39A12,SLC8A3,PRKD1,LRP2,FGF12,TMEM38B,SLC24A3,SLC44A1,THADA,NEDD4L,TRPM1,SLC39A11,APP,SLC7A2,CACNA1C,CACNB2,TMC1,SYT1,SLC8A1,KCNE4,AKAP6,HOMER2,KCNK10,TRPC5,RYR3,HECW1,KCNJ1,TRPC7,SYT10,NIPAL2,MICU1,LRR38,AKAP9,RASGRF2,KCNS3,DAPK1,SLC24A4,SEC14L1,SCN2A,ANK2,RYR2,SLC9C1,NKAIN3,SLC36A1,ABL1,SLC1A1,SLC12A8,KCNH1,NKAIN2,GSGL1,RASGRF1,ABCB7,PRKCE,SLMAP,WNK2,EGF,ABCC9,P2RX6,HTR2C,ALG10B,ATP8A1,OPRM1,HTR2A,CYBRD1,CNNM4,STAC,CNIH3,MAIP1,KCND2,AFG3L2,ANK3,NIPA2,TMEM163,ATP6V1E1,CNTN1,CACNA1I,KCNJ15,SLC10A7,SCN11A,NETO2,RELN,SLC23A2,SLC39A6,KCNH8,SLC9A4,CNKS3,CHRM5,SLC30A10,SELENON,PRKN,HEPHE1,GRIN2A,JPH1,TRPM6,CDH23,SLC12A1,KCNQ3,SHISA9,SLC4A4,SCN10A,KCND3,KCNH3,LYN,SLC44A2,SLC15A2,SLC13A5,CRACR2A,CUL5,COX5A,PLPP4,ZDHHC17,UTRN,                                                                                                                                                          |

|            |                                           |                       |                                                                                                                                                                                                                                                                                                                                                                                                                                                                                                                                                                                                                                                                                                                                                                                                                                                                                                                                                                                                                                                                                                                                                                                                                                                                                                                                                                                                                                                                                                                                                                                                                                                                                                                                                                                                                        |
|------------|-------------------------------------------|-----------------------|------------------------------------------------------------------------------------------------------------------------------------------------------------------------------------------------------------------------------------------------------------------------------------------------------------------------------------------------------------------------------------------------------------------------------------------------------------------------------------------------------------------------------------------------------------------------------------------------------------------------------------------------------------------------------------------------------------------------------------------------------------------------------------------------------------------------------------------------------------------------------------------------------------------------------------------------------------------------------------------------------------------------------------------------------------------------------------------------------------------------------------------------------------------------------------------------------------------------------------------------------------------------------------------------------------------------------------------------------------------------------------------------------------------------------------------------------------------------------------------------------------------------------------------------------------------------------------------------------------------------------------------------------------------------------------------------------------------------------------------------------------------------------------------------------------------------|
|            |                                           |                       | KCNC1,HCN1,GRIN2B,KCNK5,SLC40A1,SLC5A12,COX7A2L,NRXN1,TWIST1,MELTF,TRPV5,PRKCB,ABCC8,CACNA1E,ATP2B1,OTOP1,SLC6A1,NDFIP2,SHROOM2,SLC6A11,KCNJ18,CEMIP,CBLIF,PARK7,ADCYAP1R1,ATP13A3,EFHB,MEF2C,NDFIP1,SLC5A9,ATP6V1C2,SLC10A6,NECTIN1,FLVCR1,ATP6V1B2,SHISA6,TRPM7,IREB2,DIAPH1,SCARA5,PLCZ1,NOS1AP,SLC9A5,SLC5A1,ANO10,FYN,SCN8A,TMEM63C,NCS1,ATP5PF,NALCN,TRPM3,SLC39A8,SLC16A9,HECW2,ATPSCKMT,KCNJ6,DPP6,EPHB2,TSPAN13,ATP6V0D2,CACNG3,ATG5,VMP1,SLC1A2,KCNIP4,TRDN,NLGN1,NOS1,SLC6A3,ASIC2,KCNQ5,CACNA2D1,HTT,SLC25A18,CCR2,IL16,CATSPER2,RGS7,SLC13A4,KCNAB1,DNM1L                                                                                                                                                                                                                                                                                                                                                                                                                                                                                                                                                                                                                                                                                                                                                                                                                                                                                                                                                                                                                                                                                                                                                                                                                                                 |
| GO:0010647 | positive regulation of cell communication | 0.0007200653719779469 | NOTCH2,BCAR3,NSG1,WWC1,SLC24A2,KSR1,PLCB1,STXBP1,CHRNA7,ROBO2,RIMS1,AKR1C3,SPRED1,RIMS2,ALK,AUTS2,PJA2,ERBIN,CACNG2,MLLT3,TSHZ3,CRKL,TNIK,PTPRJ,EGFR,ANGPT1,MACF1,RNF220,NEDD4,CHSY1,NTRK3,DKK2,FLT1,MAPKBP1,DGKI,EDAR,NEO1,CNTN6,SLC8A3,PRKD1,PAK1,RAPGEF2,PELI2,LRP2,TAOK3,RPTOR,GHR,IL1R1,APP,CACNB2,MAPRE2,SEMA5A,SYT1,NTF3,KANK1,MAP4K4,BMPR1B,AKAP6,ARNT,RAB8B,ITPKB,PRKCZ,GRB10,DUSP22,YAP1,MAPK1,MGAT5,PDGFD,UBE20,PAFAH1B1,ATF6,TM7SF3,CTNNA1,RASGRF2,ADAMTS3,GRM1,PCDH11Y,PLA2R1,TMEM108,IL34,ADGRV1,SMARCA4,USP8,BLK,TNR,MBD5,ABL1,SLC1A1,NFAT5,GUCY1A2,RAP1A,GPC5,FGF10,ZC3HAV1,NRG1,ASPM,DENND2B,RASGRF1,PRKCE,WNK2,CD44,EGF,SPRED2,PTPN2,TRIM5,MCF2L,HTR2C,CLEC16A,ARHGEF7,OPRM1,HTR2A,SEMA3E,PUM1,TMOD2,ANKRD17,RELL1,EPN2,EVC,ANK3,PLCE1,TGFA,HIP1,PRR5L,DISC1,SEMA3A,BMP2,RC3H2,MYRIP,BMP2K,RELN,HMGB1,FGF9,TRAF3,TTC21B,DSTYK,SLAMF1,SMOC2,GRIK2,GAREM1,LAMC1,NEK10,CYLD,MAPK8IP1,CFTR,NEU3,KITLG,CAMTA1,SLC30A10,RB1CC1,PRKN,TBX20,GRIN2A,PRKCH,IL6R,ALS2,NLRC5,SHANK2,ROCK1,LYN,SLC44A2,RRAGD,CRACR2A,INSR,DEDD2,NEK6,NMU,BID,ERN2,TIAL1,ZDHHC17,JCAD,RASGRP1,IGSF11,CSNK2A1,BMP5,CSF1,GHRH,GRIN2B,MED1,ROR2,KL,BANK1,IL10,SFPQ,CLSTN2,PTH,NDC80,IQGAP1,RPS12,AIMP1,NRXN1,PCID2,CIBAR1,NET1,AKT3,ALKAL2,JAK2,MADD,HCTR1,CREBBP,TNKS,GORAB,PRKCB,BRD4,GID8,NDFIP2,NR2C1,MAP2K6,CCBE1,PARK7,ADCYAP1R1,MYOCD,CYFIP2,MEF2C,RXRA,WNT7A,MAP3K5,NDFIP1,MAP3K4,S100B,ATP6V1C2,SDCBP,WWOX,NCK1,FGR,CDCA8,PPP2R3A,EPHA4,NTRK2,PTK2,CDH5,ANKRD6,SCGN,LAMB1,CYFIP1,UBE3A,SEMA4D,WNT5B,NENF,NOS1AP,CCDC88A,GPR55,TNFSF11,FYN,DOK5,MAPK9,APELA,ROR1,CDH2,ITGA8,RAD9A,GPR137B,GRM5,NRP1,PRKCA,ITGA1,RC3H1,POR,STK36,BMPER,PRDM15,EPHB2,CSNK1G1,CD38,MET,SPPL3,CDH13,CACNG3,GNAS,LAMA1,MFHAS1,BMP7,DLG5,PDGFC,ERBB4,ROBO1,TRDN,NLGN1,IQCJ-SCHIP1,PRLR,AGO3,HTT,CCR2,ROCK2,KIF7,STK3,ZNF423,IGF1R,THRB,AKAP13,DNM1L |
| GO:0070848 | response to growth factor                 | 0.0008069644729910724 | NOTCH2,NLK,RDX,PRDM16,FBN1,ZEB1,SPRED1,CRKL,SOX5,EGFR,NEDD4,SOX6,NTRK3,FLT1,NEO1,PRKD1,RAPGEF2,LRP2,RUNX2,FGF12,CPS1,ONECUT1,COL4A2,APP,NTF3,BMPR1B,PCSK6,ARNT,GRB10,DUSP22,MAPK1,PDGFD,UBE20,GFRA1,ITGB8,HIVEP1,PPARA,MEIS2,ADAMTS3,PTPRK,TMEM108,USP8,ELAVL4,ABL1,PTPN12,RAP1A,FGF10,LATS2,FBN2,CD44,PDE3A,EXT1,SPRED2,LTBP1,ZFYVE9,OPRM1,EPN2,CRIM1,LDLRAD4,BMP2,PSG9,LEMD3,FGF9,DSTYK,RAP1GAP,SNX6,SMOC2,GAREM1,ATF2,RGMB,TBX20,SNX25,ROCK1,VCAM1,OVOL2,ZFH3,INSR,SNAI2,NREP,ZDHHC17,JCAD,BMP5,KCNC1,SMAD5,MED1,KL,IL10,PTH,SOSTDC1,VSTM2A,IQGAP1,NRXN1,PBLD,PEG10,TWIST1,FS TL1,CREBBP,PRKCB,CIDEA,EXT2,BRMS1L,CCBE1,MYOCD,CYFIP2,MEF2C,WNT7A,RBPMS2,PDE2A,SDCBP,WWOX,NTRK2,IL17RD,PTK2,CDH5,CYFIP1,UBE3A,FAT4,FYN,HDAC2,DOK5,FUT8,TE T1,ITGA8,NRP1,KIF16B,BMPER,MAGI2,FLRT2,BMP7,SLIT2,ERBB4,ROBO1,NOS1,FER,ROCK2,ZNF423,IGF1R                                                                                                                                                                                                                                                                                                                                                                                                                                                                                                                                                                                                                                                                                                                                                                                                                                                                                                                                                                                   |
| GO:0048814 | regulation of dendrite                    | 0.0008748924276724662 | PTPRD,TNIK,NEDD4,RAPGEF2,ADGRB3,NEDD4L,STAU2,PAK3,TRPC5,HECW1,PAFAH1B1,SDC2,KNDC1,RELN,DPYSL5,ACTR2,FBXW8,EPHA4,IL1RAPL1,FBXO31,SEMA4D,HECW2,CUX1,EPHB2,KALRN                                                                                                                                                                                                                                                                                                                                                                                                                                                                                                                                                                                                                                                                                                                                                                                                                                                                                                                                                                                                                                                                                                                                                                                                                                                                                                                                                                                                                                                                                                                                                                                                                                                          |

|            |                                                           |                       |                                                                                                                                                                                                                                                                                                                                                                                                                                                                                                                                                                                                                                                                                                                                                                                                                                                                                                                                                                                                                                                                                                                                                                                                                                                                                                                                                                                                      |
|------------|-----------------------------------------------------------|-----------------------|------------------------------------------------------------------------------------------------------------------------------------------------------------------------------------------------------------------------------------------------------------------------------------------------------------------------------------------------------------------------------------------------------------------------------------------------------------------------------------------------------------------------------------------------------------------------------------------------------------------------------------------------------------------------------------------------------------------------------------------------------------------------------------------------------------------------------------------------------------------------------------------------------------------------------------------------------------------------------------------------------------------------------------------------------------------------------------------------------------------------------------------------------------------------------------------------------------------------------------------------------------------------------------------------------------------------------------------------------------------------------------------------------|
|            | morphogenesis                                             |                       |                                                                                                                                                                                                                                                                                                                                                                                                                                                                                                                                                                                                                                                                                                                                                                                                                                                                                                                                                                                                                                                                                                                                                                                                                                                                                                                                                                                                      |
| GO:0009968 | negative regulation of signal transduction                | 0.0009112099758380914 | <p><i>MTOR,WWC1,PTPRD,NLK,ZNF536,DLC1,RIPOR2,PDE4D,BCL2,PRDM16,FBN1,SPRED1,MINAR1,ERBIN,MLLT3,APC,ARHGAP24,PTPRJ,EGFR,PRKACB,RGS3,NCOR1,NEDD4,SCAI,DKK2,MAPKBP1,INVS,LRP2,RUNX2,TAOK3,ONECUT1,USP18,ARHGAP44,CD2AP,PTPRR,KANK1,HOMER2,RGS20,PDE10A,KICS2,PRKCZ,GRB10,RGS9,HECW1,DUSP22,YAP1,ZNRF3,STK38,PAFAH1B1,NF2,CTNNA1,BIRC6,PPARA,PAK5,SLC24A4,SEC14L1,ALPK2,DUSP16,SMARCA4,MAPKAP1,PTPRT,ABL1,PTPN12,PRKAA1,FGF10,LATS2,NRG1,ZNF675,NXN,WNK2,FBN2,CD44,RGS12,PTPRO,PDE3A,IMD1,SPRED2,PTPN2,LTBP1,OPRM1,KREMEN1,FHL2,HIPK3,EPN2,GRK3,MOSMO,CRIM1,PRR5L,LDLRAD4,NPHP4,BMP2,RANBP9,TMEM161A,LEMD3,ARHGAP42,FGF9,DRAVIN,SLAMF1,GLI3,SNX6,CNKSR3,CYLD,MAPK8IP1,UBASH3A,UBR1,RCAN1,DAB1,RB1CC1,PTPRE,PRKN,MTMR2,TBX20,NLRC5,SNX25,SHANK2,SOX30,LYN,OVOL2,RNF152,OTUD7A,YTHDF3,SNAI2,ASH1L,BID,SIAH2,TRABD2B,UFD1,SAMHD1,ENPP1,NDRG2,CSNK2A1,BMP5,BCL2L1,GRB14,DHRS3,CELF4,PRAME,TNN,BANK1,IL10,SOSTDC1,PRKAA2,ITPRIP,YBX3,PBLD,PEG10,TWIST1,UFL1,NFKBIA,PRKCB,BRD4,ITGA6,OTOP1,CIDEA,STAT1,BRMS1L,DGKG,PARK7,MYOCD,RBPMS2,C16ORF72,PDE2A,WWOX,NCK1,PPP2R3A,EPHA4,MECOM,SHISA6,IL17RD,ANKRD6,ARHGAP12,AMFR,BICD1,RBMS3,HDAC2,ZFYVE28,APELA,TET1,CDH2,PHLPP1,GRM5,PID1,NRP1,FAIM,ITGA1,MCC,RGS6,FBLN1,BMPER,PRDM15,EPHB2,EYA4,MET,MAGI2,MFHAS1,BMP7,DLG5,ZMYND11,TMEM25,ABL2,EYA1,SLIT2,CNOT7,ROBO1,PRKCQ,SLIT3,ESR1,HTT,EYA2,RORA,RGS8,HERPUD1,RGS7,KIF7,FSTL4,STK3,DEPTOR,APCDD1,IGF1R,GLI2</i></p> |
| GO:0031345 | negative regulation of cell projection organization       | 0.0009436334271976512 | <p><i>SPOCK1,ULK2,MINAR1,MAP4,ARHGAP24,BCL11A,EPHA7,RAPGEF2,SEMA5A,ARHGAP44,SRGAP2C,KANK1,DIP2B,TRPC5,DNM3,YAP1,FAT3,PAFAH1B1,SEMA3C,SEMA6D,TNR,PTPRO,KREMEN1,SEMA3E,MBP,SEMA3A,SEMA3D,RAP1GAP,DRAVIN,MAP2,DCC,DAB1,NGEF,NTN1,DPYSL5,GRIN2B,NRXN1,EPHA4,UBE3A,SEMA4D,FYN,HDAC2,PTPRG,NRP1,EPHB2,CD38,SLIT2,NLGN1,SEMA4B,FSTL4</i></p>                                                                                                                                                                                                                                                                                                                                                                                                                                                                                                                                                                                                                                                                                                                                                                                                                                                                                                                                                                                                                                                                |
| GO:0051966 | regulation of synaptic transmission, glutamatergic        | 0.0009611726618432697 | <p><i>STXBP1,CACNG2,TSHZ3,GRIK3,DGKI,GRM7,SYT1,GRM1,TNR,GRM8,HTR2A,DISC1,RELN,GRIK2,GRIN2A,HCN1,GRIN2B,ROR2,NRXN1,MEF2C,GRIK1,CDH2,GRM5,CACNG3,GRM3,NLGN1,CCR2</i></p>                                                                                                                                                                                                                                                                                                                                                                                                                                                                                                                                                                                                                                                                                                                                                                                                                                                                                                                                                                                                                                                                                                                                                                                                                               |
| GO:0098742 | cell-cell adhesion via plasma-membrane adhesion molecules | 0.0010788173963851438 | <p><i>CNTN4,PTPRD,LRRRC4C,TENM4,CDH8,ROBO2,TENM3,PCDH7,GPC6,DSCAM,CRB1,CDH4,CNTN6,ALCAM,FAT3,CDH7,PCDH11Y,CDH11,CXADR,PTPRT,LRFN5,CDH18,GRID2,CDHR3,NRG1,MBP,PCDH9,CDH20,BMP2,UNC5D,DAB1,PCDH15,CDH23,VCAM1,TENM2,IGSF11,CDH26,FAT1,IL10,CLSTN2,NRXN1,CADM1,CELSR2,PCDH11X,NECTIN4,HMCN1,NECTIN1,DSG1,IL1RAPL1,CDH5,CLDN18,PCDH8,FAT4,CDH9,CRTAM,CDH2,SDK1,CDH12,CDH17,CDH13,IGSF21,KIRREL3,ROBO1,NLGN1,EFNA5,NTNG1,CLDN10</i></p>                                                                                                                                                                                                                                                                                                                                                                                                                                                                                                                                                                                                                                                                                                                                                                                                                                                                                                                                                                   |
| GO:0016311 | dephosphorylation                                         | 0.0011299266424761381 | <p><i>MTOR,PTPRD,DLC1,PTPRA,BCL2,PLPPR1,PLPPR5,PTPRJ,RPRD1A,PTPN4,TPTE2,PPP2R2B,PTPRN2,PTPRR,FIG4,DUSP22,PPM1L,MGAT5,RNGTT,MTMR10,PTPN13,PPP6R3,SYNJ1,PTPRK,PPP2R5E,DUSP16,NUAK1,PTPRT,PTPN12,INPP5A,PTPRO,MTMR3,PTPN2,AMBRA1,INPP4B,PPP2R2C,RPRD1B,ALPL,BMP2,CAMTA1,CHRM5,RCAN1,PTPRE,MTMR2,PTPRB,ROCK1,PLPP4,TMEM225,CTDP1,SYNJ2,CDC14B,PPP2R2A,IQGAP1,THNSL2,JAK2,BPNT1,PPP1R17,FRA10AC1,PDP2,MEF2C,NCK1,PPP2R3A,CDH5,SEMA4D,IMPA2,TPTE,PPM1F,SACM1L,MTMR7,PTPRG,ITGA1,SPPL3,MAGI2,MFHAS1,EYA1,HTT,EYA2,ROCK2,PPP1CB,PTPRQ</i></p>                                                                                                                                                                                                                                                                                                                                                                                                                                                                                                                                                                                                                                                                                                                                                                                                                                                                |
| GO:0009967 | positive regulation                                       | 0.001181766271        | <p><i>NOTCH2,BCAR3,WWC1,KSR1,PLCB1,CHRNA7,ROBO2,RIMS1,AKR1C3,SPRED1,RIMS2,ALK,AUTS2,PJA2,ERBIN,MLLT3,CRKL,TNFRK1,PTPRJ,EGFR,ANGPT1,MACF1,RNF220,NEDD4,CHSY1,NTRK3</i></p>                                                                                                                                                                                                                                                                                                                                                                                                                                                                                                                                                                                                                                                                                                                                                                                                                                                                                                                                                                                                                                                                                                                                                                                                                            |

|            |                                  |                               |                                                                                                                                                                                                                                                                                                                                                                                                                                                                                                                                                                                                                                                                                                                                                                                                                                                                                                                                                                                                                                                                                                                                                                                                                                                                                                                                                                                                                                                                                                                                                                                                                                                                                                                                                                                                                  |
|------------|----------------------------------|-------------------------------|------------------------------------------------------------------------------------------------------------------------------------------------------------------------------------------------------------------------------------------------------------------------------------------------------------------------------------------------------------------------------------------------------------------------------------------------------------------------------------------------------------------------------------------------------------------------------------------------------------------------------------------------------------------------------------------------------------------------------------------------------------------------------------------------------------------------------------------------------------------------------------------------------------------------------------------------------------------------------------------------------------------------------------------------------------------------------------------------------------------------------------------------------------------------------------------------------------------------------------------------------------------------------------------------------------------------------------------------------------------------------------------------------------------------------------------------------------------------------------------------------------------------------------------------------------------------------------------------------------------------------------------------------------------------------------------------------------------------------------------------------------------------------------------------------------------|
|            | of signal transduction           | 442579                        | ,DKK2,FLT1,MAPKBP1,DGKI,EDAR,NEO1,CNTN6,PRKD1,PAK1,RAPGEF2,PELI2,LRP2,TAOK3,RPTOR,GHR,IL1R1,APP,MAPRE2,SEMA5A,NTF3,KANK1,MAP4K4,BMPR1B,AKAP6,ARNT,ITPKB,PRKCZ,GRB10,DUSP22,YAP1,MGAT5,PDGFD,UBE20,PAFAH1B1,ATF6,CTNNA1,ADAMTS3,GRM1,PCDH11Y,PLA2R1,TMEM108,IL34,ADGRV1,SMARCA4,USP8,MBD5,ABL1,NFAT5,GUCY1A2,RAP1A,GPC5,FGF10,ZC3HAV1,NRG1,ASPM,DENND2B,RASGRF1,PRKCE,WNK2,CD44,EGF,SPRED2,PTPN2,TRIM5,MCF2L,HTR2C,CLEC16A,OPRM1,HTR2A,SEMA3E,PUM1,TMOD2,ANKRD17,RELL1,EPN2,EVC,PLCE1,TGFA,HIP1,PRR5L,DISC1,SEMA3A,BMP2,RC3H2,BMP2K,RELN,HMGB1,FGF9,TRAF3,TTC21B,DSTYK,SLAMF1,SMOC2,GAREM1,LAMC1,NEK10,CYLD,MAPK8IP1,NEU3,KITLG,CAMTA1,SLC30A10,RB1CC1,PRKN,TBX20,GRIN2A,PRKCH,IL6R,ALS2,NLRC5,ROCK1,LYN,SLC44A2,RRAGD,CRACR2A,INSR,DEDD2,NEK6,BID,ERN2,TIAL1,ZDHHC17,JCAD,RASGRP1,IGSF11,CSNK2A1,BMP5,CSF1,GHRH,GRIN2B,MED1,ROR2,KL,BANK1,IL10,SFPQ,PTH,NDC80,IQGAP1,RPS12,NRXN1,PCID2,CIBAR1,NET1,AKT3,ALKAL2,JAK2,MADD,HCRTR1,CREBBP,TNKS,GORAB,PRKCB,BRD4,GID8,NDFIP2,NR2C1,MAP2K6,CCBE1,PARK7,ADCYAP1R1,MYOCD,CYFIP2,MEF2C,RXRA,WNT7A,MAP3K5,NDFIP1,MAP3K4,S100B,ATP6V1C2,SDCBP,WWOX,NCK1,FGR,CDCA8,PPP2R3A,EPHA4,NTRK2,PTK2,CDH5,ANKRD6,LAMB1,CYFIP1,UBE3A,SEMA4D,WNT5B,NENF,NOS1AP,CCDC88A,GPR55,TNFSF11,FYN,DOK5,MAPK9,APELA,ROR1,CDH2,ITGA8,RAD9A,GPR137B,GRM5,NRP1,PRKCA,ITGA1,RC3H1,POR,STK36,BMPER,PRDM15,CSNK1G1,MET,SPPL3,CDH13,GNAS,LAMA1,MFHAS1,BMP7,DLG5,PDGFC,ERBB4,ROBO1,NLGN1,IQJ-SCHIP1,PRLR,AGO3,HTT,ROCK2,KIF7,STK3,ZNF423,IGF1R,THR,AKAP13,DNM1L                                                                                                                                                                                                                                                                                                                                          |
| GO:0023056 | positive regulation of signaling | 0.00127<br>2214680<br>7059092 | NOTCH2,BCAR3,NSG1,WWC1,SLC24A2,KSRI,PLCB1,STXBP1,CHRNA7,ROBO2,RIMS1,AKR1C3,SPRED1,RIMS2,ALK,AUTS2,PJA2,ERBIN,CACNG2,MLLT3,TSHZ3,CRKL,TNIK,PTPRJ,EGFR,ANGPT1,MACF1,RNF220,NEDD4,CHSY1,NTRK3,DKK2,FLT1,MAPKBP1,DGKI,EDAR,NEO1,CNTN6,SLC8A3,PRKD1,PAK1,RAPGEF2,PELI2,LRP2,TAOK3,RPTOR,GHR,IL1R1,APP,CACNB2,MAPRE2,SEMA5A,SYT1,NTF3,KANK1,MAP4K4,BMPR1B,AKAP6,ARNT,RAB8B,ITPKB,PRKCZ,GRB10,DUSP22,YAP1,MAPK1,MGAT5,PDGFD,UBE20,PAFAH1B1,ATF6,TM7SF3,CTNNA1,RASGRF2,ADAMTS3,GRM1,PCDH11Y,PLA2R1,TMEM108,IL34,ADGRV1,SMARCA4,USP8,BLK,TNR,MBD5,ABL1,SLC1A1,NFAT5,GUCY1A2,RAP1A,GPC5,FGF10,ZC3HAV1,NRG1,ASPM,DENND2B,RASGRF1,PRKCE,WNK2,CD44,EGF,SPRED2,PTPN2,TRIM5,MCF2L,HTR2C,CLEC16A,ARHGEF7,OPRM1,HTR2A,SEMA3E,PUM1,TMOD2,ANKRD17,RELL1,EPN2,EVC,ECE1,PLCE1,TGFA,HIP1,PRR5L,DISC1,SEMA3A,BMP2,RC3H2,MYRIP,BMP2K,RELN,HMGB1,FGF9,TRAF3,TTC21B,DSTYK,SLAMF1,SMOC2,GRIK2,GAREM1,LAMC1,NEK10,CYLD,MAPK8IP1,CFTR,NEU3,KITLG,CAMTA1,SLC30A10,RB1CC1,PRKN,TBX20,GRIN2A,PRKCH,IL6R,ALS2,NLRC5,SHANK2,ROCK1,LYN,SLC44A2,RRAGD,CRACR2A,INSR,DEDD2,NEK6,NMU,BID,ERN2,TIAL1,ZDHHC17,JCAD,RASGRP1,IGSF11,CSNK2A1,BMP5,CSF1,GHRH,GRIN2B,MED1,ROR2,KL,BANK1,IL10,SFPQ,CLSTN2,PTH,NDC80,IQGAP1,RPS12,AIMP1,NRXN1,PCID2,CIBAR1,NET1,AKT3,ALKAL2,JAK2,MADD,HCRTR1,CREBBP,TNKS,GORAB,PRKCB,BRD4,GID8,NDFIP2,NR2C1,MAP2K6,CCBE1,PARK7,ADCYAP1R1,MYOCD,CYFIP2,MEF2C,RXRA,WNT7A,MAP3K5,NDFIP1,MAP3K4,S100B,ATP6V1C2,SDCBP,WWOX,NCK1,FGR,CDCA8,PPP2R3A,EPHA4,NTRK2,PTK2,CDH5,ANKRD6,SCGN,LAMB1,CYFIP1,UBE3A,SEMA4D,WNT5B,NENF,NOS1AP,CCDC88A,GPR55,TNFSF11,FYN,DOK5,MAPK9,APELA,ROR1,CDH2,ITGA8,RAD9A,GPR137B,GRM5,NRP1,PRKCA,ITGA1,RC3H1,POR,STK36,BMPER,PRDM15,EPHB2,CSNK1G1,CD38,MET,SPPL3,CDH13,CACNG3,GNAS,LAMA1,MFHAS1,BMP7,DLG5,PDGFC,ERBB4,ROBO1,NLGN1,IQJ-SCHIP1,PRLR,AGO3,HTT,CCR2,ROCK2,KIF7,STK3,ZNF423,IGF1R,THR,AKAP13,DNM1L |
| GO:00      | JNK                              | 0.00129                       | PLCB1,PJA2,CRKL,TNIK,EGFR,NCOR1,MAPKBP1,EDAR,FGF12,TAOK3,APP,MAP4K4,DUSP22,PAFAH1B1,DUSP16,ZNF675,HIPK                                                                                                                                                                                                                                                                                                                                                                                                                                                                                                                                                                                                                                                                                                                                                                                                                                                                                                                                                                                                                                                                                                                                                                                                                                                                                                                                                                                                                                                                                                                                                                                                                                                                                                           |

|            |                                                          |                               |                                                                                                                                                                                                                                                                                                                                                                                                                                                                                                                                                                                                                                                                                                                                                                                                                                                                                                                                                                                                                                                                                                                                                                                                                                                                                                                                                                                                                                                                                             |
|------------|----------------------------------------------------------|-------------------------------|---------------------------------------------------------------------------------------------------------------------------------------------------------------------------------------------------------------------------------------------------------------------------------------------------------------------------------------------------------------------------------------------------------------------------------------------------------------------------------------------------------------------------------------------------------------------------------------------------------------------------------------------------------------------------------------------------------------------------------------------------------------------------------------------------------------------------------------------------------------------------------------------------------------------------------------------------------------------------------------------------------------------------------------------------------------------------------------------------------------------------------------------------------------------------------------------------------------------------------------------------------------------------------------------------------------------------------------------------------------------------------------------------------------------------------------------------------------------------------------------|
| 07254      | cascade                                                  | 7046862<br>5333584            | 3,MDFIC,SEMA3A,MAGI3,HMGB1,TRAF3,SLAMF1,ATF2,CYLD,MAPK8IP1,MAP4K3,RB1CC1,PRKN,MAPK10,CRACR2A,RASGRP1,MAPK8,WNT7A,MAP3K5,SDCBP,MECOM,ANKRD6,TNFSF11,SH2D3C,MAPK9,PHLPP1,EPHB1,MFHAS1,ZMYND11,STK3,IGF1R                                                                                                                                                                                                                                                                                                                                                                                                                                                                                                                                                                                                                                                                                                                                                                                                                                                                                                                                                                                                                                                                                                                                                                                                                                                                                      |
| GO:0019220 | regulation of phosphate metabolic process                | 0.00141<br>2715859<br>5690595 | BCAR3,MTOR,KSR1,DLC1,PDE4D,BCL2,CHRNA7,SPRED1,ALK,APC,DSCAM,CRKL,TNIK,PTPRJ,EGFR,ANGPT1,CDK12,NCOR1,NTK3,FLT1,SLC8A3,PRKD1,PAK1,EPHA7,RAPGEF2,PELI2,TAOK3,LDB2,SMYD3,RPTOR,GHR,APP,SAMSN1,NTF3,SLC8A1,BMPR1B,ARNT,RANBP2,ITPKB,TRPC5,NBN,SCP2,PRKCZ,GRB10,MCPH1,DUSP22,MAPK1,MGAT5,PDGFD,NRG3,GFRA1,STK38,PTPN13,LIMCH1,CCNG2,NF2,MOB3B,AKAP9,PPARA,PPP6R3,IL34,WNT9B,DUSP16,PARD3,MAPKAP1,NUAK1,PTPRT,ABL1,HDAC4,SLC1A1,PRKAA1,RAP1A,FGF10,LATS2,NRG1,MUSK,ZNF675,PRKCE,SLC3A1,CD44,PTPRO,EGF,PRRC1,SPRED2,MTMR3,PTPN2,HTR2C,AMBRA1,HTR2A,MARK2,EPHA6,HIPK3,CDKN2C,KNDC1,CLSPN,NOS2,MNAT1,HMGA2,CCND3,PLCE1,TGFA,PRR5L,LDLRAD4,CNTN1,BLM,BMP2,RELN,GNAQ,FGF9,SH3BP5,DSTYK,SNX6,CNKSR3,NEK10,MOB1B,ATF2,MAPK8IP1,ME2,KITLG,CAMTA1,CHRM5,RCAN1,TADA2A,DAB1,RB1CC1,PRKN,MTMR2,IL6R,ALS2,NLRC5,SNX25,SLC4A4,PTPRB,COPS8,VAV3,RALB,ROCK1,LYN,INSR,ERN2,CARD10,ENPP1,RASGRP1,SNX9,TMEM225,BMP5,CSF1,GP,RC5C,ROR2,BANK1,PTH,PRKAA2,IQGAP1,NRXN1,CENPE,ALKAL2,JAK2,MADD,RTRAF,BRD4,NEDD9,ITGA6,PPP1R17,MAP2K6,ABI1,CEMIP,IMPACT,PARK7,ADCYAP1R1,NCAPG2,MYOCD,MEF2C,MAP3K5,MAP3K4,RAB38,DBF4B,SDCBP,MLLT1,NCK1,FGR,CDCA8,EPHA4,NTRK2,OCN,PTK2,CDH5,SEMA4D,ZBTB20,KIRREL1,PDCL3,CCDC88A,TNFSF11,FYN,PPM1F,HDAC2,SH2D3C,DOCK3,NCS1,ZFYVE28,ROR1,EPHB1,GRM5,PID1,NRP1,ATPSCKMT,ITGA1,FBLN1,BMPER,MACROH2A1,EPHB2,MET,SPPL3,MAGI2,MFHAS1,BMP7,BTBD10,ADGRF5,PDGFC,SLIT2,CNOT7,ERBB4,ROBO1,NOS1,EFNA5,NSD1,PRLR,HTT,PIK3R3,FER,HRH1,ROCK2,PDK1,WASHC1,BARD1,STK3,DEPTOR,HNRNPU,IGF1R,PRKAG2,AKAP13,DNM1L |
| GO:0048646 | anatomical structure formation involved in morphogenesis | 0.00141<br>3820554<br>7156474 | NOTCH2,NEBL,TAF5,TENM4,DLC1,RIPOR2,RALA,ALDH1A2,CHRNA7,ROBO2,SDCCAG8,SPRED1,ENPEP,MINAR1,FOXJ2,DSCAM,SETD2,ARHGAP24,KDM4C,ANGPT1,PRKACB,MYOF,CRB1,TMEM182,CECR2,C5,FLT1,EDAR,SLC39A12,PRKD1,LRP2,ADGRB3,LUZP1,EPB41L3,COL4A2,SSBP3,HDAC9,SEMA5A,FIG4,THSD7A,IFT57,CALD1,COBL,YAP1,MAPK1,NRG3,GABPA,FAT3,MYLK3,FMN1,PAFAH1B1,ITGB8,TPM1,NF2,PPARA,NFIB,SF3B6,SEMA3C,SLC24A4,AGO2,ANK2,TANC1,BCAS3,WNT9B,LDB3,COL22A1,ABL1,SLC1A1,KCNH1,FGF10,GRID2,LATS2,PGM5,FBN2,EGF,EXT1,ATP8A2,PLXNA2,CNNM4,SEMA3E,FHL2,TMOD2,HERC1,EPN2,KND1,ADAM12,EMILIN2,HMGA2,MYO2,TGFA,TJP1,CNTN1,MTHFD1L,BMP2,RELN,FGF9,NFATC2,TTC21B,ETS2,ETS1,GLI3,MEGF11,SMOC2,ATF2,BBS4,COL5A1,CFTR,ITGA8,MTMR2,SH3PX2,2A,TBX20,PTPRB,VAV3,SOX30,PTGFRN,ADGRG6,ROCK1,OVOL2,HECTD1,SHROOM3,SNAI2,SP3,CD9,CARD10,JCAD,BMP5,WDR72,LAMA3,CNMD,VSTM4,SLC40A1,TNN,MED1,KDM6A,IL10,VASP,AIMP1,NRXN1,HIPK1,TWIST1,AKT3,ADAMTS5,PRKCB,ABCC8,EXT2,AGO1,MEOX2,STAT1,MTPN,ABI1,CCBE1,ITGA4,MEF2C,ADGRB1,WNT7A,NECTIN1,PPP2R3A,ADAMTS9,WNT2B,HS6ST1,PTK2,CDH5,LAMB1,PCDH8,JAM2,RUNX1,PDCL3,HDAC2,COL18A1,APELA,TET1,ITGA8,EPHB1,NRP1,SDK1,PRKCA,RC3H1,NRXN3,KIF16B,BMPER,MACROH2A1,EPHB2,CDH13,NRAP,GNAS,BMP7,RFX2,EYA1,FHOD3,SLIT2,EXOC4,ROBO1,NOS1,LOXL2,FOXB1,PIK3R3,EYA2,CCR2,STARD13,ROCK2,RORA,HSPG2,COL4A3,STK3,GLI2,AKAP13                                                                                                                                                                                                         |
| GO:0051174 | regulation of phosphorus metabolic process               | 0.00149<br>6182430<br>6183986 | BCAR3,MTOR,KSR1,DLC1,PDE4D,BCL2,CHRNA7,SPRED1,ALK,APC,DSCAM,CRKL,TNIK,PTPRJ,EGFR,ANGPT1,CDK12,NCOR1,NTK3,FLT1,SLC8A3,PRKD1,PAK1,EPHA7,RAPGEF2,PELI2,TAOK3,LDB2,SMYD3,RPTOR,GHR,APP,SAMSN1,NTF3,SLC8A1,BMPR1B,ARNT,RANBP2,ITPKB,TRPC5,NBN,SCP2,PRKCZ,GRB10,MCPH1,DUSP22,MAPK1,MGAT5,PDGFD,NRG3,GFRA1,STK38,PTPN13,LIMCH1,CCNG2,NF2,MOB3B,AKAP9,PPARA,PPP6R3,IL34,WNT9B,DUSP16,PARD3,MAPKAP1,NUAK1,PTPRT,ABL1,HDAC4,SLC1A1                                                                                                                                                                                                                                                                                                                                                                                                                                                                                                                                                                                                                                                                                                                                                                                                                                                                                                                                                                                                                                                                    |

|            |                                           |                       |                                                                                                                                                                                                                                                                                                                                                                                                                                                                                                                                                                                                                                                                                                                                                                                                                                                                                                                                                                                                                                                                                                                                                                                                                                                     |
|------------|-------------------------------------------|-----------------------|-----------------------------------------------------------------------------------------------------------------------------------------------------------------------------------------------------------------------------------------------------------------------------------------------------------------------------------------------------------------------------------------------------------------------------------------------------------------------------------------------------------------------------------------------------------------------------------------------------------------------------------------------------------------------------------------------------------------------------------------------------------------------------------------------------------------------------------------------------------------------------------------------------------------------------------------------------------------------------------------------------------------------------------------------------------------------------------------------------------------------------------------------------------------------------------------------------------------------------------------------------|
|            |                                           |                       | 1, PRKAA1, RAP1A, FGF10, LATS2, NRG1, MUSK, ZNF675, PRKCE, SLC03A1, CD44, PTPRO, EGF, PRRC1, SPRED2, MTMR3, PTPN2, HTR2C, AMBRA1, HTR2A, MARK2, EPHA6, HIPK3, CDKN2C, KNDCC1, CLSPN, NOS2, MNAT1, HMGA2, CCND3, PLCE1, TGFA, PRR5L, LDLRAD4, CNTN1, BLM, BMP2, RELN, GNAQ, FGF9, SH3BP5, DSTYK, SNX6, CNKSR3, NEK10, MOB1B, ATF2, MAPK8IP1, ME2, KITLG, CAMTA1, CHRM5, RCAN1, TADA2A, DAB1, RB1CC1, PRKN, MTMR2, IL6R, ALS2, NLRC5, SNX25, SLC4A4, PTPRB, COPS8, VAV3, RALB, ROCK1, LYN, INSR, ERN2, CARD10, ENPP1, RASGRP1, SNX9, TMEM225, BMP5, CSF1, GP, RC5C, ROR2, BANK1, PTH, PRKAA2, IQGAP1, NRXN1, CENPE, ALKAL2, JAK2, MADD, RTRAF, BRD4, NEDD9, ITGA6, PPP1R17, MAP2K6, ABI1, CEMIP, IMPACT, PARK7, ADCYAP1R1, NCAPG2, MYOCD, MEF2C, MAP3K5, MAP3K4, RAB38, DBF4B, SDCBP, MLLT1, NCK1, FGR, CDCA8, EPHA4, NTRK2, OCLN, PTK2, CDH5, SEMA4D, ZBTB20, KIRREL1, PDCL3, CCDC88A, TNFSF11, FYN, PPM1F, HDAC2, SH2D3C, DOCK3, NCS1, ZFYVE28, ROR1, EPHB1, GRM5, PID1, NRP1, ATPSCKMT, ITGA1, FBLN1, BMPER, MACROH2A1, EPHB2, MET, SPPL3, MAGI2, MFHAS1, BMP7, BTBD10, ADGRF5, PDGFC, SLIT2, CNOT7, ERBB4, ROBO1, NOS1, EFNA5, NSD1, PRLR, HTT, PIK3R3, FER, HRH1, ROCK2, PDK1, WASHC1, BARD1, STK3, DEPTOR, HNRNPU, IGF1R, PRKAG2, AKAP13, DNML1 |
| GO:0060998 | regulation of dendritic spine development | 0.001549728015425211  | STAU2, SRGAP2C, PAK3, DNMT3, PAFAH1B1, DISC1, RELN, NGEF, TANC2, ACTR2, MEF2C, FOXO6, UBE3A, ASAP1, HDAC2, SDK1, EPHB2, PPFIA2, KALRN, DLG5, NLGN1, FSTL4                                                                                                                                                                                                                                                                                                                                                                                                                                                                                                                                                                                                                                                                                                                                                                                                                                                                                                                                                                                                                                                                                           |
| GO:0048638 | regulation of developmental growth        | 0.0015524453576872522 | WWC1, ULK2, FTO, PLCB1, ZFPM2, BCL2, RIMS1, RIMS2, DSCAM, MACF1, BCL11A, CDH4, EPHA7, GHR, NEDD4L, APP, SEMA5A, SYT1, AKAP6, DIP2B, TRPC5, YAP1, NIPBL, PAFAH1B1, PPARA, SEMA3C, JARID2, BBS2, SEMA6D, TNFR, CXADR, MBD5, ABL1, LATS2, NRG1, MUSK, ATP8A2, SEMA3E, AFG3L2, DISC1, SEMA3A, SEMA3D, FGF9, SLC23A2, PLS1, DRAXIN, MAP2, BBS4, DCC, PRKN, TBX20, ITS2N, NTN1, INSR, COLQ, CSF1, GHRH, CTDP1, ATRN, YBX3, MEF2C, FLVCR1, CYFIP1, SEMA4D, RUNX1, NRP1, GNAS, ERBB4, SLC6A3, EFNA5, SEMA4B, FSTL4, STK3                                                                                                                                                                                                                                                                                                                                                                                                                                                                                                                                                                                                                                                                                                                                    |
| GO:0198738 | cell-cell signaling by wnt                | 0.0015817458733880737 | NLK, MLLT3, GPC6, APC, TNIK, EGFR, MACF1, RNF220, DKK2, INVS, PRICKLE2, APP, SEMA5A, PYGO1, KANK1, GRB10, HECW1, YAP1, ZNRF3, KLF15, TIAM1, PCDH11Y, ALPK2, CPE, WNT9B, SMARCA4, USP8, ABL1, PRKAA1, GPC5, FGF10, LATS2, ASPM, NXN, WNK2, PTPRO, EGF, EXT1, LIMD1, CTNND2, OPRM1, KREMEN1, MARK2, MDFIC, NHP4, SNX3, DISC1, STRN, BMP2, GNAQ, FGF9, TTC21B, DRAXIN, GLI3, CYLD, KPNA1, PRKN, MESD, SOX30, ZBTB33, SNAI2, SIAH2, TRABD2B, NDRG2, CSNK2A1, TNN, ROR2, SOSTDC1, PRKAA2, RPS12, CELSR2, TNKS, GID8, WNT7A, ATP6V1C2, WWOX, PPP2R3A, WNT2B, SHISA6, ANKRD6, WNT5B, AMFR, CCDC88A, RBMS3, ROR1, CDH2, RNF138, MCC, PRDM15, MITF, CSNK1G1, CDK14, MAGI2, STK3, APCDD1                                                                                                                                                                                                                                                                                                                                                                                                                                                                                                                                                                      |
| GO:0006897 | endocytosis                               | 0.0016699632123134294 | ABCA13, LRP12, TMPRSS2, CLTCL1, EPS15L1, PIK3C3, MYO1E, CARMIL1, MCTP1, FCHO2, RIN2, ANO6, CACNG2, EGFR, DENND1A, ANGPT1, DOCK2, NEDD4, BTBD9, DNAJC13, RABEP1, GRIA1, PRKD1, LRP2, LDLRAD3, GHR, NEDD4L, APP, SYT1, NTF3, CD2AP, DNMT3, CUBN, RAB27B, MAPK1, RABGAP1L, ANKFY1, STON2, SYNJ1, PLA2R1, TMEM108, RAB22A, AMPH, ANK2, TBC1D5, ABL1, NRG1, GSG1L, SH3GL3, USP33, EGF, ZFYVE9, BIN2, SH3KBP1, EPN2, GRK3, CD163, HHIPL1, HIP1, RUFY2, PACSIN2, DNER, LRP1B, ATP9A, MSRN1, RIN3, BMP2K, AP4E1, PRG4, DOCK1, NEU3, REPS1, MTMR2, ITS2N, ROCK1, INSR, DMBT1, IGHV3-74, TOM1, ESYT2, CD9, XKR5, ENPP1, SNX9, BCL2L1, IGHV2-70D, SYNJ2, ENTHD1, SNAP91, IGHV10R15-9, XKR6, ITGA4, ADGRB1, SDCBP, JPT2, NUMB, COLEC12, STON1-GTF2A1L, MEGF10, CD5L, ARHGAP12, SCAMP1, UBE3A, AP2B1, SCARA5, HEATR5A, BICD1, ATP9B, EHBP1, APELA, FCHSD2, ELMO1, CSNK1G1, CDH13, CACNG3, MAGI2, TMPRSS15, GAPVD1, ABL2, TMPRS3, NLGN1, LOXL2, IGLC3, IGHV10R21-1, RAB31, HSPG2, CLCN5, DNMT1                                                                                                                                                                                                                                                                    |

|            |                                     |                       |                                                                                                                                                                                                                                                                                                                                                                                                                                                                                                                                                                                                                                                                                                                                                                                                                                                                                                                                                                                                                                                                                                                                                                                                                                                                                                                                                                                                                                       |
|------------|-------------------------------------|-----------------------|---------------------------------------------------------------------------------------------------------------------------------------------------------------------------------------------------------------------------------------------------------------------------------------------------------------------------------------------------------------------------------------------------------------------------------------------------------------------------------------------------------------------------------------------------------------------------------------------------------------------------------------------------------------------------------------------------------------------------------------------------------------------------------------------------------------------------------------------------------------------------------------------------------------------------------------------------------------------------------------------------------------------------------------------------------------------------------------------------------------------------------------------------------------------------------------------------------------------------------------------------------------------------------------------------------------------------------------------------------------------------------------------------------------------------------------|
| GO:0022604 | regulation of cell morphogenesis    | 0.0018796811074577808 | PTPRD, MYO9A, DLC1, RDX, RIMS1, FGD4, CDC42EP3, RIMS2, CARMIL1, PARVB, ZMYM4, CRKL, MACF1, BCL11A, EPB41L3, NEDD4L, STAU2, SYT1, CFPD1, KANK1, PAK3, PAFAH1B1, TPM1, BRWD1, ABL1, GAS2, MYO10, CD44, LIMD1, PLXNA2, ARHGEF7, SEMA3E, MARK2, SH3KBP1, DOCK5, WDPCP, RELN, SLC23A2, DOCK1, PRKN, ITSN2, SHROOM3, ACTR2, PALMD, MELTF, NEDD9, OLFM4, GRIP1, WASF3, FBXW8, FGR, DNMBP, EPHA4, IL1RAPL1, FBXO31, PTK2, DIAPH1, CYFIP1, SEMA4D, FYN, MYL12B, NRP1, FBLN1, CUX1, EPHB2, FAM171A1, KALRN, EFNA5, NTNG1, EPS8, ATP10A                                                                                                                                                                                                                                                                                                                                                                                                                                                                                                                                                                                                                                                                                                                                                                                                                                                                                                          |
| GO:0040013 | negative regulation of locomotion   | 0.0018958513665066296 | PLCB1, TAF5, DLC1, RIPOR2, BCL2, ROBO2, SPRED1, MCTP1, PTPRJ, SCAI, C5, CCL28, SEMA5A, VCL, PTPRR, SRGAP2C, SRGAP2B, KANK1, DUSP22, NRG3, LIMCH1, TPM1, NF2, CTNNA1, PTPRK, SEMA3C, NAV3, SEMA6D, PTPRT, NRG1, PTPRO, PTPN2, SEMA3E, EMILIN2, LDLRAD4, SEMA3A, RIN3, SEMA3D, HMGB1, SRGAP2, DACH1, CARD10, BMP5, PRKG1, TNN, IL33, ABHD2, ABCC8, NEDD9, MEOX2, BRMS1L, MYOCD, MEF2C, ADGRB1, EPHA4, ADAMTS9, SEMA4D, HDAC2, TET1, GRM5, PTPRG, NRP1, MCC, BCR, FBLN1, SRGAP3, MITF, MAGI2, DLG5, ZMYND8, SLIT2, ROBO1, FRMD5, STARD13, SPOCK3, SEMA4B                                                                                                                                                                                                                                                                                                                                                                                                                                                                                                                                                                                                                                                                                                                                                                                                                                                                                 |
| GO:0043410 | positive regulation of MAPK cascade | 0.002082349620827072  | NOTCH2, BCAR3, WWC1, KSR1, PLCB1, CHRNA7, ALK, PJA2, CRKL, TNIK, PTPRJ, EGFR, ANGPT1, NTRK3, FLT1, MAPKBP1, EDAR, PAK1, RAPGEF2, PELI2, TAOK3, GHR, APP, NTF3, PRKCZ, DUSP22, PDGFD, GRM1, IL34, ABL1, RAP1A, FGF10, NRG1, DENND2B, PRKCE, CD44, EGF, TRIM5, HTR2C, OPRM1, HTR2A, RELL1, PLCE1, TGFA, SEMA3A, BMP2, HMGB1, TRAF3, DSTYK, SLAMF1, GAREM1, NEK10, MAPK8IP1, KITLG, SLC30A10, RB1CC1, IL6R, ROCK1, CRACR2A, INSR, ERN2, JCAD, RASGRP1, ROR2, KL, BANK1, IQGAP1, NRXN1, ALKAL2, JAK2, MADD, HCTR1, MAP2K6, MEF2C, WNT7A, MAP3K5, MAP3K4, SDCBP, EPHA4, NTRK2, ANKRD6, NENF, GPR55, TNFSF11, DOK5, APELA, CDH2, GRM5, NRP1, PRKCA, ITGA1, BMPER, MFHAS1, PDGFC, ERBB4, ROBO1, ROCK2, STK3, IGF1R, AKAP13                                                                                                                                                                                                                                                                                                                                                                                                                                                                                                                                                                                                                                                                                                                   |
| GO:1901698 | response to nitrogen compound       | 0.002119541676264687  | BCAR3, MTOR, NSG1, PLCB1, PTPRA, ITPR2, PDE4D, MYO5A, FBN1, CHRNA7, PIK3C3, GABRB3, ZEB1, ALK, ERBIN, HLCS, APC, CRKL, TNIK, EGFR, USP14, BCL11A, PSMB2, GABRB1, GRIA1, CHRM3, ADSS2, RAPGEF2, CPS1, CPEB4, TMEM38B, BCKDHB, RPTOR, GHR, HDAC9, APP, KYNU, GABRG2, SLC8A1, ECPAS, KANK1, AKAP6, HOMER2, RAB8B, RFTN1, LARP1, RAP1GDS1, RNLS, PRKCZ, GRB10, RYR3, MAPK1, HRH2, SGTB, USP25, PDGFD, SPIDR, GABPA, HRH4, GLP2R, ATF6, CTNNA1, AKAP9, KLF15, PPARA, SLC24A4, VPS13C, RYR2, EFTUD2, MBD5, ATRX, ELAVL4, ABL1, SLC1A1, PRKAA1, RAP1A, PRKCE, DENND4C, ABCC9, P2RX6, PDE3A, EXT1, PTPN2, ATXN3, HTR2C, RFTN2, OPRM1, HTR2A, TMEM67, ALPL, GNAL, CCND3, BLM, SOGA1, GNAI1, TBC1D4, GNAQ, ZNF106, ATF1, CGAS, SMARCC1, SNX6, IDE, ATF2, UMODL1, CFTR, UBR1, CHRM5, SLC30A10, SELENON, PTPRE, PRKN, GRIN2A, RALB, ROCK1, LYN, VCAM1, SEL1L, EIF2B3, RRAGD, ARID1B, CRACR2A, INSR, TFF1, UFD1, CD9, ENPP1, KCNC1, BCL2L1, HCN1, GRB14, HADHA, PPP2R2A, KL, IL10, ACTR2, SREBF2, JAK2, PCNA, UFL1, NFKBIA, PRKCB, ABCC8, ATP2B1, ASS1, ERLIN2, OTOP1, SLC6A1, STAT1, MARCHF6, IMPACT, ITGA4, UBE2J2, MEF2C, MAP3K5, OR10H2, PDE2A, NCK1, EPHA4, NTRK2, COLEC12, PTK2, DIAPH1, CYFIP1, UBE3A, AMFR, FYN, HDAC2, SEL1L2, GRM5, PID1, SDK1, POR, NSG2, GNA14, EPHB2, CDH13, STXBPA, SLC1A2, GNAS, BMP7, PDGFC, SLIT2, PRKCQ, MGMT, SLC6A3, GLDC, CACNA2D1, PIK3R3, FER, HRH1, ROCK2, RGS8, RAB31, HERPUD1, RGS7, GNG2, PNPLA3, IGF1R |
| GO:0050767 | regulation of neurogenesis          | 0.002312388420581863  | MTOR, PTPRD, ULK2, TENM4, ROBO2, DSCAM, MACF1, BCL11A, CDH4, NTRK3, EPHA7, SPEN, RAPGEF2, LRP2, STAU2, SEMA5A, PAK3, DIP2B, TRPC5, YAP1, BRINP1, PAFAH1B1, NF2, CTNNA1, PRTG, SYNJ1, TIAM1, SEMA3C, IL34, SEMA6D, TNFR, ASPM, PLXNA2, OPRM1, SEMA3E, MBP, DISC1, SEMA3A, BMP2, SEMA3D, RELN, NIN, DRAXIN, GLI3, MAP2, DCC, DAB1, PRKCH, LYN, NTN1, DPYSL5, IL33, ACTR2, MAP6, UFL1, ABCC8, WNT7A, FBXW8, EPHA4, NTRK2, IL1RAPL1, NUMB, FBXO31, CYFIP1, SEMA4D, HDAC2, GRM5, NRP1, FAIM, CHODL, CUX1, EPHB2, KALRN, TIAM2, BMP7, SLIT2, ROBO1, EFNA5, SEMA4B, HOOK3, FSTL4                                                                                                                                                                                                                                                                                                                                                                                                                                                                                                                                                                                                                                                                                                                                                                                                                                                             |
| GO:19      | neuron                              | 0.00231               | ULK2, RIMS1, RIMS2, AUTS2, DSCAM, MACF1, BCL11A, CDH4, NEDD4L, DCLK1, SEMA5A, SYT1, VCL, AURKA, DIP2B, TRPC5, PRKCZ, AL                                                                                                                                                                                                                                                                                                                                                                                                                                                                                                                                                                                                                                                                                                                                                                                                                                                                                                                                                                                                                                                                                                                                                                                                                                                                                                               |

|                |                                               |                               |                                                                                                                                                                                                                                                                                                                                                                                                                                                                                                                                                                                                                                                                                                                                                                                                                                                                                                                                                                                                                                                                                                                                                                                                                                                                                                                                                                                                                                                                                                                                                                                                                                                                                                                                                                                                                                                                                          |
|----------------|-----------------------------------------------|-------------------------------|------------------------------------------------------------------------------------------------------------------------------------------------------------------------------------------------------------------------------------------------------------------------------------------------------------------------------------------------------------------------------------------------------------------------------------------------------------------------------------------------------------------------------------------------------------------------------------------------------------------------------------------------------------------------------------------------------------------------------------------------------------------------------------------------------------------------------------------------------------------------------------------------------------------------------------------------------------------------------------------------------------------------------------------------------------------------------------------------------------------------------------------------------------------------------------------------------------------------------------------------------------------------------------------------------------------------------------------------------------------------------------------------------------------------------------------------------------------------------------------------------------------------------------------------------------------------------------------------------------------------------------------------------------------------------------------------------------------------------------------------------------------------------------------------------------------------------------------------------------------------------------------|
| 90138          | projection extension                          | 5742168<br>6287086            | CAM,PAFAH1B1,SEMA3C,TMEM108,SEMA6D,TNR,ABL1,SEMA3E,DISC1,SEMA3A,SEMA3D,SLC23A2,DRAXIN,MAP2,PRKN,ITSN2,NTN1,TNN,IQGAP1,IMPACT,ITGA4,CYFIP2,CYFIP1,SEMA4D,S<br>PAG6,NRP1,SLIT2,SLIT3,SEMA4B                                                                                                                                                                                                                                                                                                                                                                                                                                                                                                                                                                                                                                                                                                                                                                                                                                                                                                                                                                                                                                                                                                                                                                                                                                                                                                                                                                                                                                                                                                                                                                                                                                                                                                |
| GO:00<br>16055 | Wnt signaling pathway                         | 0.00239<br>7166632<br>0501584 | NLK,MLLT3,GPC6,APC,TNFK,EGFR,MACF1,RNF220,DKK2,INVS,PRICKLE2,APP,SEMA5A,PYGO1,KANK1,GRB10,HECW1,YAP1,ZNRF3,KLF15,TIAM1,PCDH11Y,ALPK2,CPE,WNT9B,SMARCA4,USP8,ABL1,PRKAA1,GPC5,FGF10,LATS2,ASPM,NXN,WNK2,PTPRO,EGF,EXT1,LIMD1,CTNND2,KREMEN1,MARK2,MDFIC,NPHP4,SNX3,DISC1,STRN,BMP2,GNAQ,FGF9,TTC21B,DRAXIN,GLI3,CYLD,KPNA1,PRKN,MESD,SOX30,ZBTB33,SNAI2,SLAH2,TRABD2B,NDRG2,CSNK2A1,TNN,ROR2,SOSTDC1,PRKAA2,RPS12,CELSR2,TNKS,GID8,WNT7A,ATP6V1C2,WWOX,PPP2R3A,WNT2B,SHISA6,ANKRD6,WNT5B,AMFR,CCDC88A,REMS3,ROR1,CDH2,RNF138,MC<br>C,PRDM15,MITF,CSNK1G1,CDK14,MAGI2,STK3,APCDD1                                                                                                                                                                                                                                                                                                                                                                                                                                                                                                                                                                                                                                                                                                                                                                                                                                                                                                                                                                                                                                                                                                                                                                                                                                                                                                          |
| GO:00<br>46578 | regulation of Ras protein signal transduction | 0.00259<br>5762893<br>245768  | NOTCH2,DLC1,RIPOR2,RDX,AUTS2,ERBIN,ARHGAP24,DENND1A,SCAI,DGKI,RALGPS1,MAPRE2,ARHGAP44,KANK1,MAP4K4,ITPKB,RASGRF2,MAPKAP1,ABL1,FGF10,NRG1,RASGRF1,DENND4C,MCF2L,PLCE1,IQSEC1,ARHGAP42,PSD3,KITLG,ALS2,ARHGEF28,ARFGEF1,RALGPS2,RASGRP1,CSF1,NET1,MADD,ARFGEF3,CYTH4,GPR55,NRP1,BCR,EPHB2,MET,ABL2,ROBO1,MYO9B,STARD13,EPS8,AKAP13                                                                                                                                                                                                                                                                                                                                                                                                                                                                                                                                                                                                                                                                                                                                                                                                                                                                                                                                                                                                                                                                                                                                                                                                                                                                                                                                                                                                                                                                                                                                                         |
| GO:00<br>51049 | regulation of transport                       | 0.00263<br>2112656<br>6239686 | CACNA2D3,WWC1,ABCA13,KCNH5,MX2,CLTCL1,DPP10,PDE4D,RDX,STXBP1,RALA,BCL2,KCNMA1,RIMS1,PIK3C3,RIMS2,MCTP1,ANO6,CACNG2,SETD2,PTPRJ,REF3,ANGPT1,DOCK2,NEDD4,BTBD9,DNAJC13,DGKI,C12ORF4,TTC39B,NUP214,PRKD1,CHRM3,FGF12,TMEM38B,UBE2L3,GRM7,THADA,NEDD4L,APP,CACNA1C,CACNB2,TMC1,SYT1,ARHGAP44,NTF3,NDUFAF2,CD2AP,SLC8A1,ABCG8,KCNE4,AKAP6,HOMER2,RAB8B,KCNK10,RAP1GDS1,CLIC6,DNM3,SCP2,PRKCZ,GRB10,RAB27B,CNST,HECW1,ABCA5,MAPK1,CADPS2,KCNJ1,SYT10,ANKFY1,SLC16A1,TM7SF3,STON2,LRRRC38,CORIN,AKAP9,KLF15,RASGRF2,PPARA,KCNS3,SYNJ1,PLA2R1,DAPK1,SCN2A,DYSF,ANK2,BCAS3,RYR2,NKAIN3,TBC1D5,BLK,ABL1,SLC1A1,PRKAA1,KCNH1,EIPR1,RAP1A,NKAIN2,FGF10,NRG1,GSG1L,RASGRF1,SH3GL3,PRKCE,SLMAP,WNK2,EGF,ABCC9,STXBP6,ATP8A2,SCG5,HTR2C,ARHGEF7,ALG10B,ATP8A1,OPRM1,HTR2A,CYP4A11,STAC,CNIH3,APBA2,KCND2,NOS2,MDFIC,MYLK2,ANK3,LYPLA1,HIP1,PRR5L,RUFY2,PACSIN2,CNTN1,SNX3,CACNA1I,KCNJ15,BMP2,ATP9A,SCN11A,TBC1D4,MYRIP,RIN3,BMP2K,NETO2,RELN,HMGB1,MYOM1,UNC13B,TTC21B,SLAMF1,KCNH8,GLI3,CNKSR3,MCTP2,MAP2,CFTF,NEU3,SLC30A10,SELENON,PRKN,MTMR2,GRIN2A,JPH1,FRMD4A,KCNQ3,SHISA9,SCN10A,USP7,KCND3,ROCK1,LYN,CRACR2A,INSR,TRIM58,PLPP4,SH3GLB1,ENPP1,UTRN,KCNC1,GHRH,BCL2L1,HCN1,GRIN2B,ABCG1,KCNK5,MICALL2,PCNT,PTH,PLA2G4A,SREBF2,ANP32B,AIMP1,NRXN1,SNAP91,TWIST1,JAK2,SLAH3,NFKBIA,PRKCB,ABCC8,CACNA1E,ATP2B1,MTCL1,SAR1A,EXOC1,SLC6A1,NDFIP2,MAP2K6,KCNJ18,CEMIP,PARK7,MAPK8,OAZ2,UBE2J2,ADCYAP1R1,TM9SF4,RAPGEF4,EFHB,MEF2C,RXRA,WNT7A,NDFIP1,SDCBP,PASK,FGR,C2,IL1RAPL1,NUMB,OCLN,SHISA6,DIA<br>PH1,CYFIP1,ICA1,NOS1AP,NSUN2,BICD1,TNFSF11,FYN,PPM1F,SCN8A,NALCN,APELA,HECW2,CDH2,FBXL20,GRM5,TBC1D1,PID1,NRP1,ATPSCMT,BCR,NRXN3,KCNJ6,DPP6,EPHB2,TSPAN13,CD38,CDH13,STXBP4,CACNG3,ATG5,MAGI2,VMP1,KALRN,SLC1A2,GAPVD1,WDR41,ABL2,KCNIP4,TRDN,NLGN1,NOS1,ASIC2,EFNA5,RAB27A,KCNQ5,CACNA2D1,HTT,CAMK1D,HLA-F,FER,CCR2,OSBPL6,IL16,CATSPER2,RAB31,SGS7,CLDN10,B<br>ARD1,CADPS,KCNAB1,PRKAG2,DNM1L |
| GO:00<br>18105 | peptidyl-serine phosphorylation               | 0.00266<br>2809662<br>4353188 | BCAR3,MTOR,ULK2,NLK,PDE4D,BCL2,EGFR,ANGPT1,NTRK3,PRKD1,PAK1,SMYD3,RPTOR,APP,RPS6KA2,DCLK1,NTF3,AURKA,PRKCZ,MAPK1,STK38,TLK1,AKAP9,STK32B,MAPKAP1,SLC1A1,PRKAA1,MAST4,CAMK4,LATS2,PRKCE,CD44,RPS6KA3,STK38L,MARK2,HIPK3,CLSPN,STK32A,VRK1,CNKSR3,PRKCH,MKNK1,ROCK1,NEK6,CSNK2A1,NRXN1,HIPK1,AKT3,TNKS,PRKCB,MAST2,PARK7,MAPK8,PKN2,NCK1,TOP1,NTRK2,PPM1F,SH2D3C,MAPK9,RPS6KA5,PRKCA,CSNK1G1,CAMK1G,PRKCQ,NOS1,NSD1,CAMK1D                                                                                                                                                                                                                                                                                                                                                                                                                                                                                                                                                                                                                                                                                                                                                                                                                                                                                                                                                                                                                                                                                                                                                                                                                                                                                                                                                                                                                                                                 |



|            |                                                                             |                       |                                                                                                                                                                                                                                                                                                                                                                                                                                                                                                                                                                                                                                                                                                                                                                                                                                                                                                                                                                                                                                                                                                                                                                                                                                                                                                                                                                                      |
|------------|-----------------------------------------------------------------------------|-----------------------|--------------------------------------------------------------------------------------------------------------------------------------------------------------------------------------------------------------------------------------------------------------------------------------------------------------------------------------------------------------------------------------------------------------------------------------------------------------------------------------------------------------------------------------------------------------------------------------------------------------------------------------------------------------------------------------------------------------------------------------------------------------------------------------------------------------------------------------------------------------------------------------------------------------------------------------------------------------------------------------------------------------------------------------------------------------------------------------------------------------------------------------------------------------------------------------------------------------------------------------------------------------------------------------------------------------------------------------------------------------------------------------|
|            |                                                                             |                       | , ROCK2, MORC3                                                                                                                                                                                                                                                                                                                                                                                                                                                                                                                                                                                                                                                                                                                                                                                                                                                                                                                                                                                                                                                                                                                                                                                                                                                                                                                                                                       |
| GO:0007157 | heterophilic cell-cell adhesion via plasma membrane cell adhesion molecules | 0.003375973804313724  | PTPRD, TENM4, TENM3, CRB1, CDH4, ALCAM, CXADR, GRID2, VCAM1, TENM2, NRXN1, CADM1, NECTIN4, HMCN1, NECTIN1, IL1RAPL1, FAT4, CRTAM, CDH2, IGSF21, NLGN1                                                                                                                                                                                                                                                                                                                                                                                                                                                                                                                                                                                                                                                                                                                                                                                                                                                                                                                                                                                                                                                                                                                                                                                                                                |
| GO:0120032 | regulation of plasma membrane bounded cell projection assembly              | 0.0035858313976942645 | MTOR, RIPOR2, RDX, RP1, RALA, SDCCAG8, CDC42EP3, AUTS2, MAP4, APC, PLPPR5, ARHGAP24, SEPTIN9, STAU2, ARHGAP44, SRGAP2C, KANK1, DNM3, COBL, YAP1, BCAS3, SYNE2, HDAC4, MYO10, PLCE1, WDPCP, RAP1GAP, CYLD, BBS4, TENM2, ACTR2, NRXN1, ANLN, GAP43, CEP120, OCLN, MARK4, CYFIP1, SAXO1, CCDC88A, ADAMTS16, NRP1, EPHB2, ATG5, SLIT2, NLGN1, HTT, FER, EPS8, WASHC1                                                                                                                                                                                                                                                                                                                                                                                                                                                                                                                                                                                                                                                                                                                                                                                                                                                                                                                                                                                                                     |
| GO:0007015 | actin filament organization                                                 | 0.0039683189535357965 | MTOR, NEBL, SVIL, MICAL3, DLC1, RDX, BCL2, MYO5A, SPIRE1, MYO1E, CDC42EP3, CARMIL1, RHPN2, MYO5C, CTNNA3, DIAPH3, PHACTR1, CRACD, PAK1, SEMA5A, CD2AP, KANK1, FMN2, CTNNA2, PAK3, CALD1, COBL, CORO2B, LIMCH1, FMN1, TPM1, NF2, CTNNA1, PPP1R9A, MPRIP, ENAH, AIF1L, XIRP2, ABL1, GAS2, PRKCE, TMOD2, SH3KBP1, HIP1, TJP1, PLS1, BBS4, PRKN, PCDH15, KANK4, MYO1D, ROCK1, ARHGAP28, SHROOM3, ARFGEF1, SNX9, MICALL2, FAT1, ACTR2, VASP, JAK2, USH1C, NEDD9, SHROOM2, MTPN, ABI1, HMCN1, CYFIP2, WASF3, MAGEL2, NCK1, ARHGAP12, DIAPH1, CYFIP1, KIRREL1, PSTPIP2, SORBS2, CCDC88A, PPM1F, SPTB, NRP1, FCHSD2, ELMO1, MYO5B, MET, NRAP, FAM171A1, FHOD3, SLIT2, GAS2L1, FER, EPS8, ROCK2, WASHC1                                                                                                                                                                                                                                                                                                                                                                                                                                                                                                                                                                                                                                                                                       |
| GO:0035295 | tube development                                                            | 0.004519911542017463  | NOTCH2, SGCD, SCAPER, TAF5, ZFPM2, DLC1, RALA, BCL2, ALDH1A2, CHRNA7, ROBO2, ZEB1, SDCCAG8, RARB, SPRED1, ENPEP, MYO1E, MINAR1, FOXJ2, RIN2, CRKL, SETD2, ARHGAP24, EGFR, ANGPT1, PRKACB, RNF220, CECR2, RXFP1, C5, FLT1, EDAR, SLC39A12, PRKD1, PAK1, EPHA7, RAPGEF2, LRP2, ADGRB3, CPS1, TMEM38B, LUZP1, COL4A2, SSBP3, HDAC9, SEMA5A, THSD7A, IFT57, CALD1, COBL, YAP1, NFIA, MAPK1, CRISPLD2, NIPBL, FMN1, ITGB8, NFIB, SEMA3C, AGO2, BCAS3, RYR2, WNT9B, COL22A1, ATRX, ABL1, SLC1A1, RAP1A, FGF10, AP3B1, SETDB2, EGF, EXT1, ADAMTS2, PLXNA2, AMBRA1, SEMA3E, EPN2, ADAM12, EMILIN2, HMGA2, ECE1, TGFA, TJP1, MTHFD1L, WDPCP, BMP2, RC3H2, FGF9, ETS1, GLI3, SMOC2, ATF2, BBS4, GTF2I, SELENON, TBX20, PTPRB, VAV3, YIPF6, ROCK1, OVOL2, NTN1, HECTD1, SHROOM3, SP3, CARD10, JCAD, BMP5, CSF1, ASB4, CNMD, SMAD5, VSTM4, TNN, MED1, KDM6A, IL10, SOSTDC1, VASP, AIMP1, NRXN1, HIPK1, TWIST1, AKT3, GORAB, PRKCB, ABCC8, ALX4, ASS1, AGO1, MEOX2, STAT1, MYO18B, CCBE1, CSMD1, ASB2, MYOCD, MEF2C, ADGRB1, WNT7A, RBPMS2, EPHA4, NTRK2, ADAMTS9, WNT2B, HS6ST1, PTK2, CDH5, CLDN18, FAT4, RUNX1, AKR1B1, PDCL3, ADAMTS16, ARL13B, COL18A1, APELA, CDH2, EPHB1, NRP1, PRKCA, NRXN3, BMPER, EPHB2, MET, CDH13, LAMA1, GREB1L, BMP7, DLG5, ADGRF5, PDGFC, EYA1, SLIT2, ROBO1, PBX1, ESR1, LOXL2, FOXB1, PIK3R3, CCR2, STARD13, ROCK2, PRDM1, RORA, HSPG2, COL4A3, STK3, GLI2, THRB |
| GO:0030900 | forebrain development                                                       | 0.00456189180896792   | TRAPPC9, PLCB1, DLC1, ALDH1A2, ROBO2, ZEB1, RARB, ALK, CNTNAP2, CRKL, SETD2, SLC4A10, EGFR, PHACTR1, RAPGEF2, LRP2, APP, DCLK1, SEMA5A, SLC8A1, SRGAP2C, MCPH1, ZSWIM6, NRG3, PAFAH1B1, NF2, NFIB, TMEM108, SYNE2, BBS2, TNFR, ATRX, ELAVL4, DNAH5, FGF10, NRG1, ASPM, EXT1, SEMA3E, BCL11B, DISC1, SEMA3A, BMP2, RELN, TTC21B, SRGAP2, NIN, DRAXIN, GLI3, BBS4, DAB1, TOX, KCNC1, GHRH, PRKG1, LMX1A, TACC2, POU1F1, FOXP2, CEP120, WNT7A, NTRK2, NUMB, WNT2B, LAMB1, FAT4, FYN, ARL13B, CDH2, XRN2, NRP1, EPHB2, SLC1A2, KIRREL3, SLIT2, CCDC141, ERBB4, ROBO1, SLC6A3, FOXB1, ATAT1, HOOK3, IGF1R, GLI2                                                                                                                                                                                                                                                                                                                                                                                                                                                                                                                                                                                                                                                                                                                                                                           |
| GO:00      | regulation                                                                  | 0.00459               | SPOCK1, DLC1, PTPRA, BCL2, CARMIL1, RIN2, CRKL, PTPRJ, MACF                                                                                                                                                                                                                                                                                                                                                                                                                                                                                                                                                                                                                                                                                                                                                                                                                                                                                                                                                                                                                                                                                                                                                                                                                                                                                                                          |

|            |                                        |                              |                                                                                                                                                                                                                                                                                                                                                                                                                                                                                                                                                                                                                                                                                                                                                                                                                                                                                                                                                                                                                                                                                                                                                                                                                                                                                                                                                                                                                                                                                                                                                                                                                                                                                                                                                                                                                                                                                                                                                                                                                                                                                                                                                                                                                                                                                           |
|------------|----------------------------------------|------------------------------|-------------------------------------------------------------------------------------------------------------------------------------------------------------------------------------------------------------------------------------------------------------------------------------------------------------------------------------------------------------------------------------------------------------------------------------------------------------------------------------------------------------------------------------------------------------------------------------------------------------------------------------------------------------------------------------------------------------------------------------------------------------------------------------------------------------------------------------------------------------------------------------------------------------------------------------------------------------------------------------------------------------------------------------------------------------------------------------------------------------------------------------------------------------------------------------------------------------------------------------------------------------------------------------------------------------------------------------------------------------------------------------------------------------------------------------------------------------------------------------------------------------------------------------------------------------------------------------------------------------------------------------------------------------------------------------------------------------------------------------------------------------------------------------------------------------------------------------------------------------------------------------------------------------------------------------------------------------------------------------------------------------------------------------------------------------------------------------------------------------------------------------------------------------------------------------------------------------------------------------------------------------------------------------------|
| 10810      | of cell-substrate adhesion             | 4919075<br>054831            | 1, ONECUT1, CCL28, TBCD, VCL, ACER2, KANK1, MAP4K4, PRKCZ, DUSP22, PLG, CORO2B, LIMCH1, FMN1, NF2, BCAS3, ABL1, PEAK1, PRKCE, PTPRO, ATXN3, ARHGEF7, SEMA3E, DOCK5, EGFLAM, DISC1, WDPCP, DOCK1, ROCK1, UTRN, CSF1, AJAP1, JAK2, MELTF, NEDD9, OLFM4, PTK2, EDIL3, PPM1F, NRP1, FBLN1, CDH13, EFNA5, ROCK2, RSU1                                                                                                                                                                                                                                                                                                                                                                                                                                                                                                                                                                                                                                                                                                                                                                                                                                                                                                                                                                                                                                                                                                                                                                                                                                                                                                                                                                                                                                                                                                                                                                                                                                                                                                                                                                                                                                                                                                                                                                          |
| GO:0001764 | neuron migration                       | 0.00460<br>9110068<br>319701 | SPOCK1, LRP12, SDCCAG8, AUTS2, ASTN1, CRKL, NTRK3, PHACTR1, NEO1, RAPGEF2, DCLK1, SRGAP2C, CTNNA2, NRG3, NIPBL, FAT3, PAFAH1B1, NRG1, ASPM, SEMA3E, MARK2, DISC1, DNER, SEMA3A, UNC5D, RELN, SRGAP2, BBS4, DCC, DAB1, TBX20, NTN1, PRKG1, TNN, TWIST1, CELSR2, MEF2C, NTRK2, FBXO31, FYN, NRP1, UNK, FLRT2, ASTN2, KIRREL3, NTNG1                                                                                                                                                                                                                                                                                                                                                                                                                                                                                                                                                                                                                                                                                                                                                                                                                                                                                                                                                                                                                                                                                                                                                                                                                                                                                                                                                                                                                                                                                                                                                                                                                                                                                                                                                                                                                                                                                                                                                         |
| GO:0060491 | regulation of cell projection assembly | 0.00491<br>9902619<br>861064 | MTOR, RIPOR2, RDX, RP1, RALA, SDCCAG8, CDC42EP3, AUTS2, MAP4, APC, PLPPR5, ARHGAP24, SEPTIN9, STAU2, ARHGAP44, SRGAP2C, KANK1, DNM3, COBL, YAP1, BCAS3, SYNE2, HDAC4, MYO10, PLCE1, WDPCP, RAP1GAP, CYLD, BBS4, TENM2, ACTR2, NRXN1, ANLN, GAP43, CEP120, OCLN, MARK4, CYFIP1, SAXO1, CCDC88A, ADAMTS16, NRP1, EPHB2, ATG5, SLIT2, NLGN1, HTT, FER, EPS8, WASHC1                                                                                                                                                                                                                                                                                                                                                                                                                                                                                                                                                                                                                                                                                                                                                                                                                                                                                                                                                                                                                                                                                                                                                                                                                                                                                                                                                                                                                                                                                                                                                                                                                                                                                                                                                                                                                                                                                                                          |
| GO:0048592 | eye morphogenesis                      | 0.00514<br>7889214<br>197348 | NOTCH2, BCAR3, RP1, BCL2, FBN1, TENM3, ZEB1, RARB, DSCAM, CRB1, STAU2, NIPBL, FAT3, EFEMP1, SLC1A1, FBN2, ATP8A2, PDE6C, TDRD7, GLI3, MEGF11, BBS4, COL5A1, RORB, SP3, DZANK1, HCN1, FAT1, HIPK1, TWIST1, VSX1, USH1C, SHROOM2, NECTIN1, PPP2R3A, NTRK2, WNT2B, EPHB1, SDK1, EPHB2, BMP7, RRGIP1, PRDM1, THRB                                                                                                                                                                                                                                                                                                                                                                                                                                                                                                                                                                                                                                                                                                                                                                                                                                                                                                                                                                                                                                                                                                                                                                                                                                                                                                                                                                                                                                                                                                                                                                                                                                                                                                                                                                                                                                                                                                                                                                             |
| GO:0046328 | regulation of JNK cascade              | 0.00529<br>0547474<br>640238 | PLCB1, PJA2, TNIK, EGFR, NCOR1, MAPKBP1, EDAR, TAOK3, APP, MAP4K4, DUSP22, PAFAH1B1, DUSP16, ZNF675, HIPK3, MDFIC, SEMA3A, MAGI3, HMGB1, TRAF3, SLAMF1, CYLD, MAPK8IP1, RB1CC1, PRKN, CRACR2A, RASGRP1, WNT7A, MAP3K5, SDCBP, MECOM, ANKRD6, TNFSF11, PHLPP1, EPHB1, MFHAS1, ZMYND11, STK3, IGF1R                                                                                                                                                                                                                                                                                                                                                                                                                                                                                                                                                                                                                                                                                                                                                                                                                                                                                                                                                                                                                                                                                                                                                                                                                                                                                                                                                                                                                                                                                                                                                                                                                                                                                                                                                                                                                                                                                                                                                                                         |
| GO:0070887 | cellular response to chemical stimulus | 0.00565<br>1452101<br>491875 | NOTCH2, BCAR3, BRINP3, MTOR, NSG1, NLK, ZNF236, PLCB1, PTPRA, ITPR2, RIPOR2, PDE4D, RDX, STXBP1, IL1RAPL2, BCL2, MYO5A, PRDM16, ALDH1A2, FBN1, CHRNA7, ROBO2, GABRB3, ZEB1, AKR1C3, RARB, SPRED1, ALK, ERBIN, ERCC6L2, ANO6, GLYAT, EGLN3, APC, CRKL, SOX5, PTPRJ, KDM4C, EGFR, ANGPT1, BACH1, NEK7, NCOR1, UGT3A2, NEDD4, BCL11A, SOX6, NTRK3, RXFP1, C5, ZFAND6, CYP2C9, FLT1, NAT1, GABRB1, GRIA1, NEO1, SLC8A3, PRKD1, PAK1, NCOA7, CHRM3, GRAMD1B, RAPGEF2, LRP2, RUNX2, FGF12, CPS1, ONECUT1, CPEB4, TMEM38B, UBE2L3, TAFA4, PTPRN2, CCL28, SMYD3, RPTOR, GHR, COL4A2, ADAM10, HDAC9, IL1R1, APP, RPS6KA2, MTUS1, STAU2, GABRG2, DOCK8, USP18, SEMA5A, SYT1, NTF3, ACER2, NDUFAF2, ST18, SLC8A1, HERPUD2, KANK1, BMPR1B, FMN2, PCSK6, AKAP6, HADHB, ARNT, RAB8B, PAK3, LARP1, ITPKB, RAP1GDS1, PRKCZ, GRB10, RYR3, DEFA3, DUSP22, YAP1, BRINP1, MAPK1, HRH2, PDGFD, SYT10, UBE2O, GFRA1, SLC16A1, SPIDR, GABPA, MICU1, CHD6, HRH4, MYLK3, GLP2R, PAFAH1B1, ATF6, TM7SF3, ITGB8, TPM1, HIVEP1, CTNNA1, AKAP9, KLF15, PPARA, ERMP1, NR5A2, ADAMTS3, PTPRK, TRERF1, PLA2R1, DAPK1, TMEM108, ACSM2B, JARD2, SCN2A, IL34, ADGRV1, MELK, BCAS3, RYR2, BBS2, WNT9B, SMARCA4, USP8, MAPKAP1, EFTUD2, CXADR, DOCK4, MBD5, ATRX, PTPRT, ELAVL4, ABL1, PTPN12, HDAC4, OXR1, SLC1A1, PRKAA1, KCNH1, NFAT5, RAP1A, FGF10, LATS2, ZNF675, PRKCE, NXN, ESRRG, DENND4C, FBN2, CD44, PTPRO, PDE3A, EXT1, SPRED2, PTPN2, TRIM5, ATXN3, HTR2C, LTBP1, ZFYVE9, OPRM1, ABCC4, HTR2A, BIN2, ALPL, GNAL, EPN2, KCND2, NOS2, CPNE4, ANK3, GBP6, CCND3, IL17RA, CRIM1, PRR5L, GSR, VAV1, MSRA, FBXO32, TJP1, LDLRAD4, BLM, ADCY10, BMP2, PSG9, SOGA1, MSR1, GNAI1, TBC1D4, RIN3, TMEM161A, LEMD3, HMGB1, GNAQ, FGF9, SLC23A2, ZNF106, TRAF3, UNC13B, DSTYK, RAP1GAP, CCDC186, SLAMF1, CGAS, SMARCC1, SNX6, SMOC2, IDE, GAREM1, ATF2, CYLD, UMODL1, BBS4, MX1, ITGA9, CFT R, RGM B, UBR1, CHRM5, SLC30A10, RORB, SELENON, PTPRE, PRKN, TBX20, LYST, ARID5B, TXNRD2, IL6R, NLRC5, SNX25, FBLN5, VAV3, RALB, ROCK1, LYN, VCAM1, CTSB, GSTA3, DTX1, OVOL2, NTN1, SLC13A5, RRAGD, ARID1B, INSR, YTHDF3, SNAI2, UFD1, RXRG, ERN2, MBTPS2, FLNB, NREP, ZDHHC17, JCAD, SAMHD1, ENPP1, PXDNL, BMP5, KCNC1, CSF1, BCL2L1, SERPINB9, HCN1, GRB14, SMAD5, SLC40A1, MED1, IPCEF1, IL33, KL, IL10, ACTR2, SFPQ, PTH, SOSTD |

|            |                                             |                      |                                                                                                                                                                                                                                                                                                                                                                                                                                                                                                                                                                                                                                                                                                                                                                                                                                                                                                                                                                                                                                                                                                                                                                                                                                                                                                                                                                                                                                                                                                                                                                                                                                                                                                                                                                                                                                                                                                                                                                               |
|------------|---------------------------------------------|----------------------|-------------------------------------------------------------------------------------------------------------------------------------------------------------------------------------------------------------------------------------------------------------------------------------------------------------------------------------------------------------------------------------------------------------------------------------------------------------------------------------------------------------------------------------------------------------------------------------------------------------------------------------------------------------------------------------------------------------------------------------------------------------------------------------------------------------------------------------------------------------------------------------------------------------------------------------------------------------------------------------------------------------------------------------------------------------------------------------------------------------------------------------------------------------------------------------------------------------------------------------------------------------------------------------------------------------------------------------------------------------------------------------------------------------------------------------------------------------------------------------------------------------------------------------------------------------------------------------------------------------------------------------------------------------------------------------------------------------------------------------------------------------------------------------------------------------------------------------------------------------------------------------------------------------------------------------------------------------------------------|
|            |                                             |                      | <p>C1, PRKAA2, CSF2RB, PACRG, ABHD2, VSTM2A, PLA2G4A, IQGAP1, YBX3, NRXN1, HIPK1, CD70, PBLD, FICD, CACYBP, PEG10, NET1, TWIST1, JAK2, FSTL1, PTGS1, CREBBP, PCNA, UFL1, NFKB1A, PRKCB, ABCC8, MT1HL1, ZC3H15, SMPD4, NEDD9, ATP2B1, ASS1, OTOP1, CIDEA, EXT2, STAT1, BRMS1L, NR2C1, MAP2K6, IMPACT, CCBE1, PARK7, MAPK8, ITGA4, MTF2, MYOCD, CYFIP2, ACACA, MEF2C, RXRA, WNT7A, RBPM2, MAP3K5, OR10H2, PDE2A, SDCBP, SPPL2B, WWOX, NCK1, CXCL2, IFNAR1, EPHA4, NTRK2, COLEC12, POSTN, IL17RD, PTK2, CDH5, TPH2, CLDN18, DIAPH1, CYFIP1, UBE3A, ZBTB20, FAT4, AKR1B1, WNT5B, AMFR, PTGFR, CHCHD2, TNFSF11, FYN, PPM1F, HDAC2, ALB, DOK5, MAPK9, FUT8, TET1, ITGA8, EPHB1, GRM5, RPS6KA5, TBC1D1, PID1, NRP1, PRKCA, GBP4, ITGA1, RC3H1, NRI1, POR, BCR, KIF16B, NSG2, GNA14, BMPER, EPHB2, MET, DLG2, STXBP4, ATG5, MAGI2, FLRT2, SLC1A2, GNAS, BMP7, PDGFC, ABL2, RFX2, SLIT2, CNOT7, ERBB4, IL20RB, ROBO1, PRKCQ, NDRG1, MGM1, NLGN1, NOS1, GLDC, EFNA5, GAS2L1, SLIT3, ESR1, CYP2C8, CACNA2D1, PRLR, CAMK1D, PIK3R3, FER, CCR2, EPS8, HRH1, ROCK2, RORA, IL16, RGS8, RAB31, PDK1, HERPUD1, GNG2, PNPLA3, ZNF423, PNPLA8, HNRNP, TGF1R, GLI2, THRB, DNMI1</p>                                                                                                                                                                                                                                                                                                                                                                                                                                                                                                                                                                                                                                                                                                                                                                                                               |
| GO:0007612 | learning                                    | 0.005933037886143992 | <p>PLCB1, CNTNAP2, DGKI, SLC8A3, ADGRB3, APP, TAFA2, SORCS3, MEIS2, SYNJ1, PAK5, TANC1, TNFR, ELAVL4, ABL1, SLC1A1, ATP8A1, RELN, PRKN, GRIN2A, ATXN1, SHANK2, INSR, ACTR2, NRXN1, ABCC8, SLC6A1, CSMD1, GABRA5, NTRK2, UBE3A, FYN, GRM5, NRXN3, RAG1, EPHB2, SPECC1, KALRN, HTT, FOXB1, HRH1</p>                                                                                                                                                                                                                                                                                                                                                                                                                                                                                                                                                                                                                                                                                                                                                                                                                                                                                                                                                                                                                                                                                                                                                                                                                                                                                                                                                                                                                                                                                                                                                                                                                                                                             |
| GO:0090596 | sensory organ morphogenesis                 | 0.006277173620124004 | <p>NOTCH2, BCAR3, RIPOR2, RP1, BCL2, FBN1, TENM3, ZEB1, RARB, MYO3B, DSCAM, CRB1, STAU2, MAPK1, NIPBL, FAT3, EFEMP1, SLC1A1, FGF10, FBN2, ATP8A2, WDPCP, PDE6C, FGF9, TDRD7, PLS1, GLI3, MEGF11, BBS4, COL5A1, RORB, MYO3A, PCDH15, CDH23, LRIG1, NTN1, HOXC13, SP3, DZANK1, HCN1, FAT1, TTC39C, HIPK1, TWIST1, VSX1, USH1C, OTOP1, SHROOM2, NECTIN1, PPP2R3A, NTRK2, WNT2B, HDAC2, ITGA8, EPHB1, SDK1, BCR, EPHB2, BMP7, EYA1, RPGRIP1, PRDM1, PTPRQ, GLI2, THRB</p>                                                                                                                                                                                                                                                                                                                                                                                                                                                                                                                                                                                                                                                                                                                                                                                                                                                                                                                                                                                                                                                                                                                                                                                                                                                                                                                                                                                                                                                                                                         |
| GO:0048584 | positive regulation of response to stimulus | 0.00630982081599716  | <p>NOTCH2, BCAR3, MTOR, WWC1, KSR1, PLCB1, RIPOR2, PDE4D, STXB1, BCL2, CHRNA7, ROBO2, RIMS1, EPC2, SPIRE1, AKRIC3, SPRED1, RIMS2, ALK, AUTS2, PJA2, BABAM2, ERBIN, ANO6, MLLT3, SUSD4, HHLA2, DSCAM, CRKL, TNIK, PTPRJ, EGFR, ANGPT1, MACF1, RNF220, NEDD4, CHSY1, NTRK3, C5, DKK2, FLT1, MAPKBP1, DGKI, EDAR, NEO1, CNTN6, PRKD1, PAK1, RAPGEF2, PELI2, LRP2, TAOK3, RPTOR, GHR, ADAM10, IL1R1, APP, MAPRE2, SEMA5A, NTF3, KANK1, MAP4K4, BMPR1B, FMN2, AKAP6, ARNT, PAK3, RFTN1, ITPKB, PRKCZ, GRB10, DUSP22, YAP1, MAPK1, MGAT5, PLG, PDGFD, UBE2O, SPIDR, PAFAH1B1, ATF6, CTNNA1, ADAMTS3, GRM1, PCDH11Y, PLA2R1, TMEM108, IL34, ADGRV1, NKG7, SMARCA4, USP8, SPG21, BLK, MBD5, ABL1, NFAT5, GUCY1A2, RAP1A, GPC5, FGF10, ZC3HAV1, NRG1, INO80D, ASPM, DENND2B, RASGRF1, PRKCE, WNK2, CD44, EGF, SPRED2, PTPN2, TRIM5, MCF2L, ATXN3, HTR2C, CLEC16A, OPRM1, HTR2A, SEMA3E, GCSAML, PUM1, TMOD2, MSH2, ANKRD17, RELN, EPN2, EVC, RBBP8, EMILIN2, PLCE1, TGFA, IL17RA, HIP1, PRR5L, VAV1, HLAB, DISC1, SEMA3A, BMP2, RC3H2, BMP2K, TMEM161A, RELN, HMGB1, FGF9, NFATC2, TRAF3, TTC21B, DSTYK, UIMC1, SLAMF1, SMARCA2, ETS1, CGAS, SMARCC1, SMOC2, GAREM1, LAMC1, NEK10, CYLD, MAPK8IP1, UBASH3A, NEU3, KITLG, CAMTA1, SLC30A10, SELENON, RB1CC1, PRKN, TBX20, DPF3, GRIN2A, PRKCH, IL6R, ALS2, NLRC5, VAV3, KIR2DL4, NPAS2, ROCK1, LYN, EIF2B3, SLC44A2, RRAGD, ARID1B, CRACR2A, INSR, DEDD2, NEK6, ARFGEF1, IGHV3-74, BID, ERN2, TIAL1, PLPP4, ZDHHC17, NSD2, JCAD, RASGRP1, IGSF11, CSNK2A1, BMP5, CSF1, GHRH, GRIN2B, INO80, FANCB, IGHV2-70D, MED1, IL33, ROR2, CFH, KL, BANK1, IL10, ACTR2, SFPQ, PTH, NDC80, PLA2G4A, IQGAP1, RPS12, FYB2, NRXN1, PCID2, CIBAR1, CADM1, NET1, AKT3, ALKAL2, JAK2, MADD, HCRTR1, CREBBP, TNKS, GORAB, PCNA, NFKB1A, PRKCB, BRD4, NEDD9, IGHV10R15-9, GID8, NDFIP2, NR2C1, MAP2K6, CCBE1, PARK7, ADCYAP1R1, MYOCD, CYFIP2, MEF2C, RXRA, WNT7A, MAP3K5, NDFIP1, MAP3K4, S100B, ATP6V1C2, RAD51AP1, PDE2A, SDCBP, NSMCE1, WWOX, NCK1,</p> |

|            |                                                                           |                       |                                                                                                                                                                                                                                                                                                                                                                                                                                                                                                                                                                                                                                                                                                                                                                                                                                                                                                                                                                                                                                                                                                                                                                                                                                                                                                                                                                                                                                                                                                                                                                                                                                                                                                                                                                                                                                                                                                                                                                                                                                                                                                                                                                                                                                                                                                                                                                                                       |
|------------|---------------------------------------------------------------------------|-----------------------|-------------------------------------------------------------------------------------------------------------------------------------------------------------------------------------------------------------------------------------------------------------------------------------------------------------------------------------------------------------------------------------------------------------------------------------------------------------------------------------------------------------------------------------------------------------------------------------------------------------------------------------------------------------------------------------------------------------------------------------------------------------------------------------------------------------------------------------------------------------------------------------------------------------------------------------------------------------------------------------------------------------------------------------------------------------------------------------------------------------------------------------------------------------------------------------------------------------------------------------------------------------------------------------------------------------------------------------------------------------------------------------------------------------------------------------------------------------------------------------------------------------------------------------------------------------------------------------------------------------------------------------------------------------------------------------------------------------------------------------------------------------------------------------------------------------------------------------------------------------------------------------------------------------------------------------------------------------------------------------------------------------------------------------------------------------------------------------------------------------------------------------------------------------------------------------------------------------------------------------------------------------------------------------------------------------------------------------------------------------------------------------------------------|
|            |                                                                           |                       | FGR, CDCA8, PPP2R3A, C2, RNF8, EPHA4, NTRK2, OCLN, PTK2, CDH5, CD5L, ANKRD6, NFKBID, LAMB1, CYFIP1, UBE3A, SEMA4D, C9, WNT5B, NENF, SH2D1B, NOS1AP, CCDC88A, GPR55, TNFSF11, FYN, PPM1F, SLF1, DOK5, MAPK9, CRTAM, APELA, ROR1, CDH2, ITGA8, RAD9A, GPR137B, GRM5, NRP1, PRKCA, ITGA1, RC3H1, POR, STK36, BMPER, PRDM15, MACROH2A1, CSNK1G1, CD38, EYA4, MET, SPPL3, CDH13, MYB, GNAS, LAMA1, MFHAS1, BMP7, DLG5, PDGFC, EYA1, SLIT2, ERBB4, ROBO1, PRKCQ, MGMT, NLGN1, SHLD2, IGLC3, IQCJ-SCHIP1, PRLR, AGO3, HTT, CAMK1D, HLA-F, EYA2, CCR2, A2M, IGHV10R21-1, ROCK2, IL16, HERPUD1, KIF7, STK3, ZNF423, IGF1R, THRB, AKAP13, DNMI1L                                                                                                                                                                                                                                                                                                                                                                                                                                                                                                                                                                                                                                                                                                                                                                                                                                                                                                                                                                                                                                                                                                                                                                                                                                                                                                                                                                                                                                                                                                                                                                                                                                                                                                                                                                |
| GO:0045935 | positive regulation of nucleobase - containing compound metabolic process | 0.006930479175590292  | BCAR3, MTOR, WWC1, FTO, MGA, PLCB1, ZFPM2, TNRC6B, PRDM16, EPC2, SPIRE1, ZEB1, RARB, AUTS2, FOXJ2, BABAM2, GLIS3, FANK1, MLLT3, TCF4, ERG, NEK4, EGFR, RFX3, CDK12, BACH1, NEK7, ZNF407, MAML2, BCL11A, FLI1, RFC3, TASP1, THRAP3, PRKD1, NCOA7, RUNX2, ONECUT1, UBE2L3, LDB2, SMYD3, RPTOR, SSBP3, ATF7IP, APBB2, APP, KDM1B, ZNF600, PARN, ST18, PYGO1, SSBP2, ANKRD31, DUX4, BMPR1B, FMN2, ZNF717, ARNT, PAK3, NBN, TAF15, MRTFA, TAF4B, EBF2, YAP1, NFIA, MAPK1, KMT2E, PCGF5, NIPBL, SPIDR, GABPA, CHD6, KANSL1, ATF6, HIVEP1, KLF15, PPARA, MEIS2, NFIB, MRTFB, NR5A2, FOXJ3, TRERF1, AGO2, GATAD2B, BCAS3, ZNF606, SMARCA4, TNRC6C, ATRX, ABL1, HDAC4, PRKAA1, APLF, NFAT5, GLIS1, TOX3, CAMK4, FGF10, ZC3HAV1, INO80D, AP3B1, ZNF438, ZBTB16, FOXK2, MED15, ESRRG, EGF, RPS6KA3, TRIM5, RFC1, KDM7A, HTR2A, GTF2F2, TAF3, RPRD1B, EBF3, ZNF33B, PUM1, MSH2, NOS2, BICRAL, RBBP8, MDFIC, HMGA2, BCL11B, CREM, PRR5L, BRCA2, BLM, BMP2, RC3H2, GFI1B, TMEM161A, ASXL3, HMGB1, NFATC2, ZNF462, ETS2, UIMC1, ATF1, SMARCA2, ETS1, GLI3, SMARCC1, SMOC2, VENTX, PRDM10, RERE, ATF2, HIVEP3, PSIP1, RGMB, CAMTA1, GTF2I, RORB, TADA2A, MED27, ZNF208, NMD3, PRKN, TBX20, DPF3, ARID5B, NLRC5, TFDP1, CNOT6L, TOX, SLC4A4, ZFP90, USP7, PLAGL1, SOX30, NPAS2, ROCK1, ZNF780B, DTX1, OVOL2, ZFHX3, BANP, SUPT16H, ARID1B, HOXC13, BAZ1A, CASZ1, INSR, YTHDF3, PBX3, ZNF292, ASH1L, HOXC4, RXRG, SP3, MBTPS2, ELF2, NSD2, BMP5, INO80, FANCB, CLNS1A, SMAD5, CELF4, TCERG1, SLC40A1, MED1, IL33, ZNF521, CSDE1, LMX1A, IL10, ACTR2, SFPQ, RIOK1, PTH, PRKAA2, ETV6, ZBTB7C, TEAD1, SREBF2, PCID2, LMX1B, TWIST1, JAK2, ZBTB38, PATL1, ZNF287, CREBBP, TNKS, PCNA, NFKBIA, PRKCB, RFC2, ALX4, RTRAF, BRD4, ITGA6, ZBTB49, STOX2, AGO1, MEOX2, ELL2, STAT1, PARK7, MED12L, POU1F1, MTF2, MYOCD, ARID3B, MEF2C, RXRA, WNT7A, MAP3K5, MAP3K4, ZNF112, RAD51AP1, DBF4B, WWOX, NCK1, SCAF8, MLLT10, RNF8, MECOM, DNMT3L, CREB5, ASCL3, UBE3A, ZBTB20, RUNX1, ZNF845, CHCHD2, TNFSF11, KDM5A, HDAC2, SLF1, TBX15, NCS1, PABPC1, TET1, ARNT2, ITGA8, RPS6KA5, PID1, ZNF615, KLF12, RC3H1, NRIP1, ZNF850, SUPT3H, TUT4, PRIM2, PRDM15, MITF, CD38, EYA4, MET, CDH13, PRDM11, MLIP, MYB, BMP7, BPTF, NUDT21, KMT2C, RFX2, EYA1, CNOT7, ERBB4, SAMD4A, PBX1, NPAS3, PRKCQ, MGMT, SHLD2, NOS1, TCF12, ARHGEF11, NSD1, ESR1, AGO3, EYA2, ZNF721, NRF1, ROCK2, RORA, DMRT1, NCOA6, ZNF423, HNRNPU, IGF1R, GLI2, THRB |
| GO:0048013 | ephrin receptor signaling pathway                                         | 0.007333486930732641  | ANKS1B, NTRK3, PAK1, EPHA7, PAK3, CHN1, TIAM1, ARHGEF7, EPHA6, NGEF, ARHGEF28, LYN, NCK1, EPHA4, PTK2, FYN, EPHB1, EPHB2, KALRN, EFNA5                                                                                                                                                                                                                                                                                                                                                                                                                                                                                                                                                                                                                                                                                                                                                                                                                                                                                                                                                                                                                                                                                                                                                                                                                                                                                                                                                                                                                                                                                                                                                                                                                                                                                                                                                                                                                                                                                                                                                                                                                                                                                                                                                                                                                                                                |
| GO:0018108 | peptidyl-tyrosine phosphorylation                                         | 0.0077343200567419265 | MTOR, ALK, MAP3K9, PTPRJ, EGFR, ANGPT1, PTPN4, NTRK3, FLT1, EPHA7, GHR, APP, SAMSN1, NTF3, PRKCZ, DUSP22, PDGFD, GFRA1, EFEMP1, NF2, IL34, MELK, BLK, ABL1, FGF10, PEAK1, NRG1, MUSK, PRKCE, CD44, EGF, PTPN2, HTR2A, EPHA6, HIPK3, TGFA, CNTN1, RELN, SH3BP5, DSTYK, SNX6, KITLG, IL6R, LYN, CHKA, INSR, ROR2, BANK1, HIPK1, ALKAL2, JAK2, NEDD9, MAP2K6, ABI1, NCAPG2, FGR, EPHA4, NTRK2, PTK2, SEMA4D, PDCL3, FYN, HDAC2, DOCK3, ZFYVE28, ROR1, EPHB1, GRM5, NRP1, BCR, EPHB2, MET, PDGFC, ABL2, CNOT7, ERBB4, EFNA5, PRLR, FER, IGF1R                                                                                                                                                                                                                                                                                                                                                                                                                                                                                                                                                                                                                                                                                                                                                                                                                                                                                                                                                                                                                                                                                                                                                                                                                                                                                                                                                                                                                                                                                                                                                                                                                                                                                                                                                                                                                                                             |
| GO:00      | cellular                                                                  | 0.00779               | NOTCH2, NLK, RDX, PRDM16, FBN1, ZEB1, SPRED1, CRKL, SOX5, EG                                                                                                                                                                                                                                                                                                                                                                                                                                                                                                                                                                                                                                                                                                                                                                                                                                                                                                                                                                                                                                                                                                                                                                                                                                                                                                                                                                                                                                                                                                                                                                                                                                                                                                                                                                                                                                                                                                                                                                                                                                                                                                                                                                                                                                                                                                                                          |

|            |                                    |                              |                                                                                                                                                                                                                                                                                                                                                                                                                                                                                                                                                                                                                                                                                                                                                                                                                                                                                                                                                                                                                                                                                                                                                                                                                                |
|------------|------------------------------------|------------------------------|--------------------------------------------------------------------------------------------------------------------------------------------------------------------------------------------------------------------------------------------------------------------------------------------------------------------------------------------------------------------------------------------------------------------------------------------------------------------------------------------------------------------------------------------------------------------------------------------------------------------------------------------------------------------------------------------------------------------------------------------------------------------------------------------------------------------------------------------------------------------------------------------------------------------------------------------------------------------------------------------------------------------------------------------------------------------------------------------------------------------------------------------------------------------------------------------------------------------------------|
| 71363      | response to growth factor stimulus | 9827599<br>6693355           | FR,NEDD4,SOX6,NTRK3,FLT1,NEO1,PRKD1,RAPGEF2,LRP2,RUNX2,FGF12,CPS1,ONECUT1,COL4A2,APP,NTF3,BMPRI1B,PCSK6,ARNT,GRB10,DUSP22,PDGFD,UBE20,GFRA1,ITGB8,HIVEP1,PPARA,ADAMTS3,PTPRK,TMEM108,USP8,ELAVL4,ABL1,PTPN12,RAP1A,FGF10,LATS2,FBN2,CD44,PDE3A,EXT1,SPRED2,LTBP1,ZFYVE9,EPN2,CRIM1,LDLRAD4,BMP2,PSG9,LEMD3,FGF9,DSTYK,RAP1GAP,SNX6,SMOC2,GAREM1,ATF2,RGMB,TBX20,SNX25,VCAM1,OVOL2,INSR,SNAI2,NREP,ZDHHC17,JCAD,BMP5,SMAD5,MED1,KL,IL10,SOSTDC1,VSTM2A,IQGAP1,NRXN1,PBLD,PEG10,TWIST1,FSTL1,CREBBP,PRKCB,CIDEA,EXT2,BRMS1L,CCBE1,MYOCD,CYFIP2,MEF2C,WNT7A,RBPMS2,PDE2A,SDCBP,WWOX,NTRK2,IL17RD,PTK2,CDH5,CYFIP1,UBE3A,FAT4,FYN,HDAC2,DOCK5,FUT8,TET1,ITGA8,NRP1,KIF16B,BMPER,MAGI2,FLRT2,BMP7,SLIT2,ERBB4,ROBO1,NOS1,ZNF423,IGF1R                                                                                                                                                                                                                                                                                                                                                                                                                                                                                               |
| GO:0035239 | tube morphogenesis                 | 0.00931<br>1962672<br>062924 | NOTCH2,SGCD,TAF5,ZFPM2,DLC1,RALA,BCL2,CHRNA7,ZEB1,SDCCAG8,SPRED1,ENPEP,MYO1E,MINAR1,FOXJ2,RIN2,SETD2,ARHGAP24,EGFR,ANGPT1,PRKACB,CECR2,C5,FLT1,EDAR,SLC39A12,PRKD1,PAK1,EPHA7,RAPGEF2,LRP2,ADGRB3,LUZP1,COL4A2,HDAC9,SEMA5A,THSD7A,IFT57,CALD1,COBL,YAP1,NIPBL,FMN1,ITGB8,NFIB,AGO2,BCAS3,RYR2,WNT9B,COL22A1,ABL1,SLC1A1,RAP1A,FGF10,SETDB2,EGF,EXT1,SEMA3E,EPN2,ADAM12,EMILIN2,HMGA2,TGFA,TJP1,MTHFD1L,BMP2,FGF9,ETS1,GLI3,SMOC2,ATF2,BBS4,GT2F2,TBX20,PTPRB,VAV3,ROCK1,OVOL2,NTN1,HECTD1,SHROOM3,CARD10,JCAD,BMP5,CSF1,ASB4,CNMD,VSTM4,TNN,MED1,KDM6A,IL10,SOSTDC1,VASP,AIMP1,NRXN1,HIPK1,TWIST1,AKT3,PRKCB,ABCC8,AGO1,MEOX2,STAT1,MYO18B,CCBE1,CSMD1,ASB2,MYOCD,MEF2C,ADGRB1,WNT7A,RBPMS2,EPHA4,NTRK2,ADAMTS9,WNT2B,HS6ST1,PTK2,CDH5,FAT4,RUNX1,PDCL3,ADAMTS16,ARL13B,COL18A1,APELA,CDH2,EPHB1,NRP1,PRKCA,NRXN3,BMPER,EPHB2,MET,CDH13,LAMA1,GREB1L,BMP7,DLG5,ADGRF5,EYA1,SLIT2,ROBO1,PBX1,ESR1,LOXL2,PIK3R3,CCR2,STARD13,ROCK2,PRDM1,RORA,HSPG2,COL4A3,STK3,GLI2                                                                                                                                                                                                                                                            |
| GO:0009790 | embryo development                 | 0.00951<br>9360203<br>306902 | NOTCH2,PLCB1,ZFPM2,TENM4,DLC1,RIPOR2,RALA,ALDH1A2,FBN1,ZEB1,RARB,MYO1E,MYO3B,SETD2,KDM4C,EGFR,ANGPT1,PRKACB,RNF220,CECR2,C5,FLT1,LRP2,RUNX2,LUZP1,COL4A2,SSBP3,ADAM10,CACNA1C,PTPRR,CMIP,PCSK6,ARNT,NBN,IFT57,COBL,YAP1,MAPK1,PLG,NIPBL,GABPA,MBNL1,PAFAH1B1,EFEMP1,NF2,BIRC6,MEIS2,NR5A2,ADAMTS3,SF3B6,SEMA3C,RYR2,WNT9B,ANKS6,ABL1,FGF10,LATS2,INO80D,ZBTB16,SETDB2,NXN,FBN2,EXT1,ATP8A2,PLXNA2,ST8SIA6,AMBRA1,MSH2,APBA2,RBBP8,XYL1,HMGA2,ECE1,MBP,TJP1,MTHFD1L,BRCA2,WDR33,BMP2,FGF9,TDRD7,ETS2,PLS1,GLI3,AFF3,TDRD5,ATF2,HIRA,BBS4,COL5A1,DOP1B,KITLG,TADA2A,MYO3A,SH3PXD2A,TBX20,PCDH15,CDH23,ALS2,RACGAP1,SEC24D,ROCK1,LRIG1,OVOL2,NTN1,MMP16,INSR,HECTD1,SHROOM3,PBX3,HOXC4,TANC2,SP3,PLPP4,BMP5,BCL2L1,LAMA3,INO80,SMAD5,CCLF4,MED1,KDM6A,IL10,TTC39C,VASP,TEAD1,YBX3,HIPK1,TWIST1,RBM19,CREBBP,GORAB,ALX4,USH1C,SMPD4,ADCY9,OTOP1,EXT2,STOX2,MEOX2,ABI1,MYO18B,ITGA4,NCAPG2,ASB2,MEF2C,WNT7A,RBPMS2,FBXW8,FLVCR1,PPP2R3A,TOP1,DNMT3L,WNT2B,HS6ST1,LAMB1,PCDH8,WNT5B,NSUN2,ARL13B,HDAC2,TBX15,APELA,FUT8,TET1,ARNT2,ITGA8,NRP1,BCR,KITFD1L,BRCA2,MACROH2A1,EPHB2,SPECC1,KIAA1217,UNK,LAMA1,BMP7,BPTF,ADGRF5,PDGFC,NECAB1,EYA1,EXOC4,ERBB4,PBX1,EHMT1,FOXO1,RAD51B,EYA2,A2M,ROCK2,PRDM1,PTPRQ,HSD17B2,STK3,ZNF568,GLI2 |
| GO:0018212 | peptidyl-tyrosine modification     | 0.00956<br>3279105<br>495684 | MTOR,ALK,MAP3K9,PTPRJ,EGFR,ANGPT1,PTPN4,NTRK3,FLT1,EPHA7,GHR,APP,SAMSN1,NTF3,PRKCZ,DUSP22,PDGFD,GFRA1,EFEMP1,NF2,IL34,MELK,BLK,ABL1,FGF10,PEAK1,NRG1,MUSK,PRKCE,CD44,EGF,PTPN2,HTR2A,EPHA6,HIPK3,TGFA,CNTN1,RELN,SH3BP5,DSTYK,SNX6,KITLG,IL6R,LYN,CHKA,INSR,ROR2,BANK1,HIPK1,ALKAL2,JAK2,NEDD9,MAP2K6,ABI1,NCAPG2,FGR,EPHA4,NTRK2,PTK2,SEMA4D,PDCL3,FYN,HDAC2,DOCK3,ZFYVE28,ROR1,EPHB1,GRM5,NRP1,BCR,EPHB2,MET,PDGFC,ABL2,CNOT7,ERBB4,EFNA5,PRLR,FER,IGF1R                                                                                                                                                                                                                                                                                                                                                                                                                                                                                                                                                                                                                                                                                                                                                                     |

|            |                                                          |                              |                                                                                                                                                                                                                                                                                                                                                                                                                                                                                                                                                                                                                                                                                                                                                                                                                                                                                                                                                                                                                                                                                                                                                                                                                                                                                                                                                                                                                            |
|------------|----------------------------------------------------------|------------------------------|----------------------------------------------------------------------------------------------------------------------------------------------------------------------------------------------------------------------------------------------------------------------------------------------------------------------------------------------------------------------------------------------------------------------------------------------------------------------------------------------------------------------------------------------------------------------------------------------------------------------------------------------------------------------------------------------------------------------------------------------------------------------------------------------------------------------------------------------------------------------------------------------------------------------------------------------------------------------------------------------------------------------------------------------------------------------------------------------------------------------------------------------------------------------------------------------------------------------------------------------------------------------------------------------------------------------------------------------------------------------------------------------------------------------------|
| GO:0042325 | regulation of phosphorylation                            | 0.01015<br>8690253<br>331423 | BCAR3,MTOR,KSR1,PDE4D,BCL2,CHRNA7,SPRED1,ALK,APC,DS<br>CAM,CRKL,TN1K,PTPRJ,EGFR,ANGPT1,CDK12,NCOR1,NTRK3,F<br>LT1,SLC8A3,PRKD1,PAK1,EPHA7,RAPGEF2,PELI2,TAOK3,LDB<br>2,SMYD3,RPTOR,GHR,APP,SAMSN1,NTF3,SLC8A1,BMPR1B,ARN<br>T,RANBP2,ITPKB,TRPC5,NBN,PRKCZ,GRB10,MCPH1,DUSP22,M<br>APK1,PDGFD,NRG3,GFRA1,STK38,PTPN13,LIMCH1,CCNG2,NF2<br>,MOB3B,AKAP9,PPARA,IL34,WNT9B,DUSP16,PAR3,MAPKAP1,<br>PTPRT,ABL1,HDAC4,SLC1A1,PRKAA1,RAP1A,FGF10,LATS2,NR<br>G1,MUSK,ZNF675,PRKCE,SLC3A1,CD44,PTPRO,EGF,PRRC1,S<br>PRED2,PTPN2,AMBRA1,HTR2A,MARK2,EPHA6,HIPK3,CDKN2C,K<br>NDC1,CLSPN,MNAT1,HMGA2,CCND3,PLCE1,TGFA,PRR5L,LDLRA<br>D4,CNTN1,BLM,BMP2,RELN,GNAQ,FGF9,SH3BP5,DSTYK,SNX6,<br>CNKSR3,NEK10,MOB1B,ATF2,MAPK8IP1,KITLG,TADA2A,DAB1,<br>RB1CC1,PRKN,IL6R,ALS2,NLRC5,SNX25,SLC4A4,PTPRB,COPS<br>8,VAV3,RALB,ROCK1,LYN,INSR,ERN2,CARD10,ENPP1,RASGRP<br>1,SNX9,BMP5,CSF1,GPRC5C,ROR2,BANK1,PRKAA2,TQGA1,NR<br>XN1,CENPE,ALKAL2,JAK2,MADD,RTRAF,BRD4,NEDD9,ITGA6,M<br>AP2K6,ABI1,CEMIP,IMPACT,PARK7,NCAPG2,MYOC,MF2C,MA<br>P3K5,MAP3K4,DBF4B,SDCBP,MLLT1,NCK1,FGR,CDCA8,EPHA4,<br>NTRK2,OCN,PTK2,CDH5,SEMA4D,ZBTB20,KIRREL1,PDCL3,CC<br>DC88A,TNFSF11,FYN,PPM1F,HDAC2,SH2D3C,DOCK3,ZFYVE28,<br>ROR1,EPHB1,GRM5,PID1,NRP1,FBLN1,BMPER,MACROH2A1,EPH<br>B2,MET,BMP7,BTBD10,PDGFC,SLIT2,CNOT7,ERBB4,ROBO1,NO<br>S1,EFNA5,NSD1,PRLR,HTT,PIK3R3,FER,ROCK2,WASHC1,BARD<br>1,STK3,DEPTOR,HNRNPU,IGF1R,PRKAG2,AKAP13                 |
| GO:0030111 | regulation of Wnt signaling pathway                      | 0.01138<br>7336604<br>00744  | NLK,MLLT3,APC,EGFR,MACF1,RNF220,DKK2,INVS,APP,SEMA5<br>A,KANK1,GRB10,HECW1,YAP1,ZNRF3,KLF15,TIAM1,PCDH11Y,<br>ALPK2,SMARCA4,USP8,ABL1,GPC5,FGF10,LATS2,ASPM,NXN,W<br>NK2,PTPRO,EGF,LIMD1,CTNND2,KREMEN1,MDFIC,NPH4,SNX3<br>,DISC1,BMP2,GNAQ,FGF9,TTC21B,DRAXIN,GLI3,CYLD,KPNA1<br>,PRKN,SOX30,SNAI2,SIAH2,TRABD2B,CSNK2A1,TNN,SOSTDC1<br>,RPS12,TNKS,GID8,ATP6V1C2,WWOX,PPP2R3A,SHISA6,ANKRD<br>6,WNT5B,AMFR,RBMS3,CDH2,MCC,PRDM15,CSNK1G1,CDK14,ST<br>K3,APCDD1                                                                                                                                                                                                                                                                                                                                                                                                                                                                                                                                                                                                                                                                                                                                                                                                                                                                                                                                                           |
| GO:0010977 | negative regulation of neuron projection developmen<br>t | 0.01159<br>1125781<br>495962 | SPOCK1,ULK2,MINAR1,BCL11A,EPHA7,SEMA5A,KANK1,DIP2B,<br>DNM3,FAT3,PAFAH1B1,SEMA3C,SEMA6D,TNR,PTPRO,KREMEN1,<br>SEMA3E,MBP,SEMA3A,SEMA3D,DRAXIN,MAP2,DCC,DAB1,NGEF,<br>NTN1,EPHA4,UBE3A,SEMA4D,HDAC2,PTPRG,NRP1,EPHB2,CD38<br>,SLIT2,NLGN1,SEMA4B,FSTL4                                                                                                                                                                                                                                                                                                                                                                                                                                                                                                                                                                                                                                                                                                                                                                                                                                                                                                                                                                                                                                                                                                                                                                      |
| GO:0033554 | cellular response to stress                              | 0.01166<br>5787700<br>067768 | MTOR,IMMP2L,FTO,PLCB1,BCL2,ARPP21,PIK3C3,EPC2,SPIRE<br>1,AKR1C3,SPRED1,PJA2,BABAM2,ERCC6L2,EGLN3,APC,CRKL,<br>SETD2,TN1K,NEK4,EGFR,USP14,BACH1,NCOR1,NEDD4,NSMCE2<br>,RFC3,MAPKBP1,EDAR,SLC8A3,PRKD1,PAK1,NCOA7,FGF12,TA<br>OK3,CPEB4,HERC2,RPTOR,TMEM117,APP,STAU2,ACER2,SLC8A<br>1,HERPUD2,ECPAS,MAP4K4,FMN2,ARNT,UBE2E2,KICS2,NBN,I<br>NTS7,SUSD6,MSH6,DUSP22,YAP1,SEM1,WDR70,MAPK1,SGTB,U<br>SP25,PDGFD,SYCP1,NIPBL,SPIDR,MICU1,CORO2B,CHD6,PAFA<br>H1B1,ATF6,TM7SF3,TLK1,TPM1,CTNNA1,RASGRF2,PPARA,ERM<br>P1,PTPRK,PLA2R1,DAPK1,VPS13C,WDHD1,SCN2A,DNAJC15,ME<br>LK,WNT9B,DUSP16,SMARCA4,MAPKAP1,BLK,TNR,ATRX,NUAK1,<br>ELAVL4,ABL1,OXR1,SLC1A1,PRKAA1,APLF,NFAT5,SLFN11,FG<br>F10,INO80D,RASGRF1,ZNF675,SMARCA1,PRKCE,USP33,CD44<br>,SPRED2,RPS6KA3,MTMR3,PTPN2,ATXN3,RFC1,CLEC16A,AMBR<br>A1,OPRM1,FANCM,FANCA,KREMEN1,STAC,TMEM67,MSH2,RELL1<br>,HIPK3,KCND2,CLSPN,MNAT1,RBBP8,MDFIC,HMGA2,VPS41,PR<br>R5L,GSR,MSRA,BRCA2,BLM,SEMA3A,MAGI3,HSF2BP,BMP2,VRK<br>1,TMEM161A,HMGB1,NFATC2,TRAF3,UIMC1,SLAMF1,SMARCA2,<br>CGAS,SMARCC1,MYEF2,ZFYVE26,ATF2,CYLD,MAPK8IP1,CFTR,<br>DNAJC7,MAP4K3,SLC30A10,CHAF1A,SELENON,RB1CC1,PRKN,M<br>APK10,DPF3,USP43,DMC1,FBLN5,ST8SIA1,USP7,VAV3,KIR2D<br>L4,RALB,NPAS2,LYN,SEL1L,CHKA,FANCL,RRAGD,SUPT16H,AR<br>ID1B,CRACR2A,RNF152,NEK6,XRCC4,SNAI2,BID,UFD1,ERN2,<br>MBTPS2,NREP,NSD2,SH3GLB1,SAMHD1,RASGRP1,PWWP3A,BCL2<br>L1,INO80,FANCB,FOXN3,CDC14B,IL10,ACTR2,SFPQ,PRKAA2, |

|            |                               |                              |                                                                                                                                                                                                                                                                                                                                                                                                                                                                                                                                                                                                                                                                                                                                                                                                                                                                                                                                                                                                                                                                                                                                                                                                                                                                                                                                                                                                                                                                                                                                                                                                                                                                                                                                                                                                                                                                                                                                                                                                                                                                                                                                                                                                                                                                                                                                                                                                                                                                                                                                                                                                                                                                                                                                                                                                                      |
|------------|-------------------------------|------------------------------|----------------------------------------------------------------------------------------------------------------------------------------------------------------------------------------------------------------------------------------------------------------------------------------------------------------------------------------------------------------------------------------------------------------------------------------------------------------------------------------------------------------------------------------------------------------------------------------------------------------------------------------------------------------------------------------------------------------------------------------------------------------------------------------------------------------------------------------------------------------------------------------------------------------------------------------------------------------------------------------------------------------------------------------------------------------------------------------------------------------------------------------------------------------------------------------------------------------------------------------------------------------------------------------------------------------------------------------------------------------------------------------------------------------------------------------------------------------------------------------------------------------------------------------------------------------------------------------------------------------------------------------------------------------------------------------------------------------------------------------------------------------------------------------------------------------------------------------------------------------------------------------------------------------------------------------------------------------------------------------------------------------------------------------------------------------------------------------------------------------------------------------------------------------------------------------------------------------------------------------------------------------------------------------------------------------------------------------------------------------------------------------------------------------------------------------------------------------------------------------------------------------------------------------------------------------------------------------------------------------------------------------------------------------------------------------------------------------------------------------------------------------------------------------------------------------------|
|            |                               |                              | <p>PACRG,MORC2,SREBF2,YBX3,HIPK1,FICD,NET1,TWIST1,AKT3,JAK2,CHCHD6,ZBTB38,FH,TDP1,CREBBP,PCNA,UFL1,NFKBIA,RFC2,BRD4,GAP43,ASS1,ERLIN2,CIDEA,MAP2K6,MARCHF6,IMPACT,PARK7,MAPK8,TOP3A,UBL7,UBE2J2,MYH13,HNRNPM,ASCC2,MEF2C,WNT7A,MAP3K5,MAP3K4,RAD51AP1,SDCBP,NSMCE1,NCK1,RNF8,EPHA4,MECOM,WNT2B,FBXO31,ERP27,ANKRD6,INIP,AKR1B1,AMFR,SAXO1,SCARA5,ZFYVE1,CHCHD2,CDC45,TNFSF11,FYN,SDE2,HDAC2,SLF1,SH2D3C,ALB,MAPK9,FUT8,SEL1L2,RAD9A,PHLPP1,EPHB1,FAAP24,RNF138,SUPT3H,C14ORF39,EYA4,MET,STXBP4,ATG5,MFHAS1,BMP7,ZMYND11,PLIN2,PARBPB,EYA1,NDRG1,MGMT,SHLD2,GAS2L1,MTREX,RAD51B,MACROD2,FER,EYA2,OARD1,ROCK2,RORA,CDCA5,PDK1,HERPUD1,NCOA6,BARD1,STK3,PNPLA8,IGF1R,PRKAG2,MORC3</p>                                                                                                                                                                                                                                                                                                                                                                                                                                                                                                                                                                                                                                                                                                                                                                                                                                                                                                                                                                                                                                                                                                                                                                                                                                                                                                                                                                                                                                                                                                                                                                                                                                                                                                                                                                                                                                                                                                                                                                                                                                                                                                                                   |
| GO:0010033 | response to organic substance | 0.01215<br>9616646<br>323444 | <p>NOTCH2,BCAR3,BRINP3,MTOR,NSG1,NLK,LONP2,ZNF236,PLCB1,MX2,PTPRA,ITPR2,RIPOR2,PDE4D,RDX,STXBP1,IL1RAPL2,BCL2,MYO5A,KCNMA1,PRDM16,ALDH1A2,FBN1,CHRNA7,ROBO2,PIK3C3,GABRB3,ZEB1,AKR1C3,RARB,SPRED1,ALK,ERBIN,HLCSS,APC,CRKL,ILDR2,SOX5,SETD2,TNIK,PTPRJ,KDM4C,EGFR,USP14,ANGPT1,NCOR1,UGT3A2,NEDD4,BCL11A,SOX6,PSMB2,NTRK3,RXFP1,ZFAND6,FLT1,RFC3,GABRB1,NEO1,PRKD1,PAK1,CHRM3,ADSS2,GRAMD1B,RAPGEF2,LRP2,RUNX2,ARSB,FGF12,CPS1,ONECUT1,CPEB4,TMEM38B,BCKDHB,UBE2L3,PTPRN2,SMYD3,RPTOR,GHR,COL4A2,ADAM10,HDAC9,IL1R1,APP,RPS6KA2,KYNU,GABRG2,DOCK8,USP18,NTF3,ACER2,NDUFAF2,ST18,SLC8A1,HERPUD2,ECPAS,KANK1,BMPR1B,PCSK6,AKAP6,HOMER2,HADHB,ARNT,RAB8B,PAK3,RFTN1,LARP1,RAP1GDS1,RNLS,PRKCZ,GRB10,RYR3,DEFA3,DUSP22,YAP1,BRINP1,MAPK1,HRH2,ABCD3,SGTB,USP25,PAPPA,PDGFD,UBE2O,GFRA1,SLC16A1,SPIDR,GABPA,HRH4,MYLK3,ACSBG1,GLP2R,PAFAH1B1,ATF6,TM7SF3,ITGB8,HIVEP1,CTNNA1,AKAP9,KLF15,PPARA,MEIS2,ERMP1,SYNJ1,NR5A2,ADAMTS3,PTPRK,TRERF1,DAPK1,SLC24A4,VPS13C,TMEM108,JARID2,IL34,ANK2,BCAS3,RYR2,BBS2,WNT9B,SMARCA4,USP8,EFTUD2,MBD5,ATRX,PTPRT,ELAVL4,ABL1,PTPN12,HDAC4,SLC1A1,PRKAA1,NFAT5,RAP1A,FGF10,LATS2,ZNF675,PRKCE,ESRRG,DENND4C,FBN2,CD44,ABCC9,P2RX6,PDE3A,EXT1,SPRED2,RPS6KA3,PTPN2,TRIM5,ATXN3,HTR2C,CD96,RFTN2,LTBP1,ZFYVE9,OPRM1,HTR2A,TMEM67,ALPL,FHL2,GNAL,EPN2,NOS2,GBP6,CCND3,F5,MBP,IL17RA,CRIM1,FBXO32,TJP1,LDLRAD4,BLM,AGL,BMP2,PSG9,SOGA1,MSR1,GNAI1,TBC1D4,TMEM161A,LEMD3,HMGB1,GNAQ,FGF9,SLC23A2,ZNF106,TRAF3,UNC13B,DSTYK,RAP1GAP,ATF1,CCDC186,GLI3,CGAS,SMARCC1,SNX6,AFF3,SMOC2,IDE,GAREM1,ATF2,CYLD,UMODL1,BBS4,MX1,CFTR,RGMB,UBR1,CHRM5,MAP4K3,SLC30A10,RORB,SELENON,PTPRE,PRKN,TBX20,GRIN2A,ARID5B,IL6R,NLRCS,SNX25,SOX30,RALB,ROCK1,LYN,VCAM1,SEL1L,CTSB,EIF2B3,DTX1,OVL2,ZFH3,RRAGD,ARID1B,CRACR2A,INSR,DMBT1,YTHDF3,TF1,SNAI2,UFD1,RXRG,ERN2,MBTPS2,FLNB,NREP,ZDHHC17,CD9,JCAD,SAMHD1,ENPP1,BMP5,KCNC1,CSF1,BCL2L1,SERPINB9,HCN1,GRIN2B,GRB14,SMAD5,ABCG1,HADHA,MED1,IL33,PPP2R2A,KL,IL10,ACTR2,PTH,SOSTDC1,PRKAA2,CSF2RB,PACRG,ABHD2,VSTM2A,IQGAP1,SREBF2,YBX3,NRXN1,HIPK1,CD70,PBLD,FICD,CACYBP,PEG10,TWIST1,JAK2,FSTL1,CREBBP,PCNA,UFL1,NFKBIA,PRKCB,GOT2,ABCC8,ZC3H15,SMPD4,ATP2B1,ASS1,ERLIN2,OTOP1,CIDEA,EXT2,SLC6A1,STAT1,BRMS1L,NR2C1,MAP2K6,MARCHF6,IMPACT,CCBE1,PARK7,MAPK8,ITGA4,UBE2J2,ADCYAP1R1,MTF2,MYOCD,CYFIP2,ACACA,MEF2C,RXRA,WNT7A,RBPMS2,MAP3K5,OR10H2,PDE2A,SDCBP,DSG1,SPPL2B,WWOX,NCK1,CXCL2,C2,IFNAR1,EPHA4,NTRK2,COLEC12,POSTN,IL17RD,PTK2,ERP27,CDH5,TPH2,CLDN18,DIAPH1,CYFIP1,UBE3A,ZBTB20,FAT4,WNT5B,AMFR,PTGFR,TNFSF11,FYN,HDAC2,DOCK5,FUT8,TET1,ITGA8,SEL1L2,GRM5,RPS6KA5,TBC1D1,PID1,NRP1,SDK1,PRKCA,GBP4,RC3H1,NRIP1,POR,BCR,RERG,KIF16B,NSG2,GNA14,BMPER,EPHB2,CD38,CDH13,STXBP4,MAGI2,FRLT2,SLC1A2,GNAS,BMP7,PDGFC,PLIN2,ABL2,RF2,SLIT2,CNOT7,ERBB4,IL20RB,ROBO1,PRKCQ,MGMT,NOS1,SLC6A3,GLDC,EFNA5,GAS2L1,SLIT3,ESR1,CACNA2D1,PRLR,PIK3R3,FER,C</p> |

|            |                                                  |                      |                                                                                                                                                                                                                                                                                                                                                                                                                                                                                                                                                                                                                                                                                                                                                                                                                                                                                                                                                                                                                                                                                                                                                                                                                                                                                                                                                                                                                                                                                                                   |
|------------|--------------------------------------------------|----------------------|-------------------------------------------------------------------------------------------------------------------------------------------------------------------------------------------------------------------------------------------------------------------------------------------------------------------------------------------------------------------------------------------------------------------------------------------------------------------------------------------------------------------------------------------------------------------------------------------------------------------------------------------------------------------------------------------------------------------------------------------------------------------------------------------------------------------------------------------------------------------------------------------------------------------------------------------------------------------------------------------------------------------------------------------------------------------------------------------------------------------------------------------------------------------------------------------------------------------------------------------------------------------------------------------------------------------------------------------------------------------------------------------------------------------------------------------------------------------------------------------------------------------|
|            |                                                  |                      | <i>CR2, A2M, EPS8, HRH1, ROCK2, RORA, RGS8, RAB31, HERPUD1, NCOA6, HSD17B2, COL4A3, RGS7, GNG2, PNPLA3, ZNF423, HNRNPU, IGFBP1, GLI2, THRB</i>                                                                                                                                                                                                                                                                                                                                                                                                                                                                                                                                                                                                                                                                                                                                                                                                                                                                                                                                                                                                                                                                                                                                                                                                                                                                                                                                                                    |
| GO:0032409 | regulation of transporter activity               | 0.01283888950341599  | <i>PDE4D, BCL2, CACNG2, NEDD4, CHRM3, FGF12, THADA, NEDD4L, APP, CACNB2, KCNE4, AKAP6, HECW1, LRRC38, AKAP9, RASGRF2, DAPK1, ANK2, RYR2, GSG1L, RASGRF1, PRKCE, SLMAP, WNK2, ABCC9, ALG10B, OPRM1, STAC, CNIH3, ANK3, NETO2, RELN, CNKSR3, CFTR, SELENON, JPH1, SHISA9, CRACR2A, UTRN, KCNC1, HCN1, NRXN1, TWIST1, ABCC8, NDFIP2, PARK7, MEF2C, RXRA, NDFIP1, SHISA6, NOS1AP, HECW2, GRM5, ATPCKMT, EPHB2, CACNG3, VMP1, TRDN, NLGN1, NOS1, CACNA2D1, HTT, CCR2, KCNAB1</i>                                                                                                                                                                                                                                                                                                                                                                                                                                                                                                                                                                                                                                                                                                                                                                                                                                                                                                                                                                                                                                       |
| GO:0044380 | protein localization to cytoskeleton             | 0.012943239011543465 | <i>CEP192, APC, MAPRE2, AURKA, MCPH1, ABL1, CEP83, HTR2A, ABHD17C, DISC1, NUDCD3, BBS4, KIAA0753, CHAMP1, MARK4, DIAPH1, BICD1, GAS2L1, HOOK3, HNRNPU, CEP72</i>                                                                                                                                                                                                                                                                                                                                                                                                                                                                                                                                                                                                                                                                                                                                                                                                                                                                                                                                                                                                                                                                                                                                                                                                                                                                                                                                                  |
| GO:0018210 | peptidyl-threonine modification                  | 0.012991390706947499 | <i>MTOR, NLK, BCL2, SPRED1, GALNT1, PRKD1, RPTOR, APP, TRPC5, MAPK1, GALNT16, PARD3, GALNTL6, EGF, SPRED2, MARK2, HIPK3, MYLK2, GALNT13, CDC42BPB, ATF2, CDC42BPA, ROCK1, CSNK2A1, EOGT, HIPK1, TNKS, CEMIP, MAPK8, GALNT2, PRKCA, BMP7, ROCK2, PRKAG2</i>                                                                                                                                                                                                                                                                                                                                                                                                                                                                                                                                                                                                                                                                                                                                                                                                                                                                                                                                                                                                                                                                                                                                                                                                                                                        |
| GO:0060429 | epithelium development                           | 0.013242172129204888 | <i>NOTCH2, MTOR, MYO9A, PLCB1, DLC1, ZDHHC21, RIPOR2, PDE4D, RDX, RALA, BCL2, ALDH1A2, ROBO2, ZEB1, AKRIC3, RARB, SPRED1, MYO1E, USH2A, FOXJ2, MLLT3, GPC6, SETD2, ARHGAP24, EGFR, RFX3, PRKACB, RNF220, CECR2, EDAR, PAK1, EPHA7, RAPGEF2, LRP2, DEUP1, CPS1, ONECUT1, TMEM38B, PRICKLE2, LDB2, LUZP1, SSBP3, TMC1, VCL, IFT57, MRTFA, COBL, YAP1, RIPK4, MAPK1, ZNRF3, LCE1F, FMN1, PAFAH1B1, NF2, KLF15, NFIB, NR5A2, TIAM1, KAZN, SEMA3C, RYR2, WNT9B, COL22A1, ATRX, ABL1, RAP1A, FGF10, TGM1, LATS2, NRG1, AP3B1, SETDB2, CD44, PTPRO, EGF, EXT1, SPRED2, PLXNA2, AMBRA1, SEMA3E, BCL11B, ECE1, TJP1, MTHFD1L, BRCA2, WDCP, BMP2, TDRD7, ESRP1, PLS1, GLI3, SLC9A4, BBS4, COL5A1, TBX20, PCDH15, CDH23, PRKCH, LCE3B, YIPF6, ROCK1, CTSC, OVOL2, NTN1, HOXC13, DMBT1, HECTD1, SHROOM3, SNAI2, FLNB, CERS3, KRT6B, BMP5, CSF1, KRT25, LAMA3, SMAD5, SLC40A1, MYCL, PSAP, MED1, KDM6A, AJAP1, FAT1, IL10, SOSTDC1, VASP, IQGAP1, TWIST1, JAK2, FSTL1, CELSR2, GORAB, PCNA, ANXA4, ALX4, USH1C, KRT6A, MEOX2, GRXCR1, STAT1, ABI1, CSMD1, ASB2, KRT85, MEF2C, WNT7A, PDE2A, PPP2R3A, SPRR2D, LCE3D, EPHA4, FND3A, WNT2B, CDH5, ANKRD6, ARHGAP12, PCDH8, FRMD6, FAT4, AKR1B1, WNT5B, NSUN2, ADAMTS16, TNFSF11, ARL13B, HYDIN, HDAC2, COL18A1, APELA, ROR1, CDH2, NTN4, NRP1, BCR, B9D1, BMPER, MACROH2A1, MET, MAGI2, GNAS, LAMA1, GREB1L, BMP7, ASTN2, DLG5, EYA1, SLIT2, ERBB4, ROBO1, PBX1, SIPA1L3, MGMT, ESR1, PRLR, FOXB1, RAD51B, FER, STARD13, ROCK2, PRDM1, DMRT1, PTPRQ, STK3, APCDD1, GLI2, THRB</i> |
| GO:0031644 | regulation of nervous system process             | 0.013309562453316465 | <i>TENM4, CHRNA7, RIMS1, RIMS2, DLGAP1, SLC8A3, FGF12, TFAA4, APP, FIG4, PRKCZ, AKAP9, GRM1, TMEM108, PARD3, TNFR, HTR2C, OPRM1, SCN11A, RELN, UNC13B, MTMR2, DLGAP2, GRIN2A, SHISA9, IGSF11, GRIN2B, CELF4, IL33, IL10, NRXN1, WNT7A, WASF3, SHISA6, JAM2, ATPCKMT, TMEM25, NLGN1, ROCK2</i>                                                                                                                                                                                                                                                                                                                                                                                                                                                                                                                                                                                                                                                                                                                                                                                                                                                                                                                                                                                                                                                                                                                                                                                                                     |
| GO:0022898 | regulation of transmembrane transporter activity | 0.013446735273550205 | <i>PDE4D, BCL2, CACNG2, NEDD4, CHRM3, FGF12, THADA, NEDD4L, APP, CACNB2, KCNE4, AKAP6, HECW1, LRRC38, AKAP9, RASGRF2, DAPK1, ANK2, RYR2, GSG1L, RASGRF1, PRKCE, SLMAP, WNK2, ABCC9, ALG10B, OPRM1, STAC, CNIH3, ANK3, NETO2, RELN, CNKSR3, CFTR, SELENON, JPH1, SHISA9, CRACR2A, UTRN, KCNC1, HCN1, NRXN1, TWIST1, ABCC8, PARK7, MEF2C, SHISA6, NOS1AP, HECW2, GRM5, ATPCKMT, EPHB2, CACNG3, VMP1, TRDN, NLGN1, NOS1, CACNA2D1, HTT, CCR2, KCNAB1</i>                                                                                                                                                                                                                                                                                                                                                                                                                                                                                                                                                                                                                                                                                                                                                                                                                                                                                                                                                                                                                                                             |
| GO:0016049 | cell growth                                      | 0.013789261819505967 | <i>MTOR, SPOCK1, ULK2, BCL2, RIMS1, MINAR1, RIMS2, AUTS2, PAPP A2, DSCAM, CRKL, PTPRJ, EGFR, MACF1, BCL11A, CDH4, EPHA7, RPTOR, EPB41L3, NEDD4L, ADAM10, APP, DCLK1, SEMA5A, SYT1, VCL, AURKA, AKAP6, DIP2B, TRPC5, PRKCZ, COBL, YAP1, ALCAM, NRG3, PAFAH1B1, PPARA, PAK5, SEMA3C, TMEM108, SEMA6D, SMARCA4, MAPKAP1, TNFR, ABL1, NRG1, EXT1, RPS6KA3, SEMA3E, CDKN2C, PL</i>                                                                                                                                                                                                                                                                                                                                                                                                                                                                                                                                                                                                                                                                                                                                                                                                                                                                                                                                                                                                                                                                                                                                     |



|            |                                                  |                      |                                                                                                                                                                                                                                                                                                                                                                                                                                                                                                                                                                                                                                                                                                                                                                                                                                                                                                                                                                                                                                                                                                                                                                                                                                                                                                                                                                                                                                                                                                                                                                                                                                                                                                                                                     |
|------------|--------------------------------------------------|----------------------|-----------------------------------------------------------------------------------------------------------------------------------------------------------------------------------------------------------------------------------------------------------------------------------------------------------------------------------------------------------------------------------------------------------------------------------------------------------------------------------------------------------------------------------------------------------------------------------------------------------------------------------------------------------------------------------------------------------------------------------------------------------------------------------------------------------------------------------------------------------------------------------------------------------------------------------------------------------------------------------------------------------------------------------------------------------------------------------------------------------------------------------------------------------------------------------------------------------------------------------------------------------------------------------------------------------------------------------------------------------------------------------------------------------------------------------------------------------------------------------------------------------------------------------------------------------------------------------------------------------------------------------------------------------------------------------------------------------------------------------------------------|
|            |                                                  |                      | CE1,CRIM1,PDLIM5,DISC1,SEMA3A,SEMA3D,SLC23A2,NIN,DRAXIN,SMARCA2,MAP2,DCC,PRKN,FBLN5,ITSN2,NTN1,ENPP1,C SNK2A1,CTDP1,INO80,TNN,LMX1A,IQGAP1,TEAD1,NET1,PRSS2,MTPN,IMPACT,ITGA4,MYOCD,CYFIP2,SDCBP,EXTL3,CYFIP1,SEMA4D,SORBS2,SPAG6,NRP1,RERG,CD38,PRDM11,SLIT2,PRKCQ,EFNA5,ARHGEF11,SLIT3,SEMA4B,FSTL4,AKAP13                                                                                                                                                                                                                                                                                                                                                                                                                                                                                                                                                                                                                                                                                                                                                                                                                                                                                                                                                                                                                                                                                                                                                                                                                                                                                                                                                                                                                                        |
| GO:0072698 | protein localization to microtubule cytoskeleton | 0.014460724337194197 | CEP192,APC,MAPRE2,AURKA,MCPH1,ABL1,CEP83,ABHD17C,DISC1,NUDCD3,BBS4,KIAA0753,CHAMP1,MARK4,DIAPH1,BICD1,GAS2L1,HOOK3,HNRNPU,CEP72                                                                                                                                                                                                                                                                                                                                                                                                                                                                                                                                                                                                                                                                                                                                                                                                                                                                                                                                                                                                                                                                                                                                                                                                                                                                                                                                                                                                                                                                                                                                                                                                                     |
| GO:0045597 | positive regulation of cell differentiation      | 0.015276223195639498 | NOTCH2,BRINP3,MTOR,PTPRD,PLCB1,TENM4,RIPOR2,BCL2,ROBO2,ZEB1,CARMIL1,RIN2,DSCAM,TCF4,CRKL,SOX5,RFX3,MACF1,BCL11A,SOX6,CDH4,PRKD1,SPEN,RAPGEF2,LRP2,RUNX2,GHR,ZHX3,STAU2,SEMA5A,AURKA,BMPR1B,AKAP6,ARNT,PAK3,ITPKB,TRPC5,PRKCZ,YAP1,BRINP1,MYLK3,PAFAH1B1,NF2,SYNJ1,TIAM1,IL34,RANBP3L,SMARCA4,ABL1,RAP1A,NRG1,ASPM,AP3B1,ATP11C,ZBTB16,SH3GL3,FBN2,PDE3A,RPS6KA3,PLXNA2,HTR2C,ARHGEF7,AMBRA1,OPRM1,HTR2A,DOCK5,DISC1,BMP2,MSR1,RELN,HMGB1,DOCK1,NIN,SMARCA2,ETS1,GLI3,SMARCC1,PCP4,LAMC1,NELL1,KITLG,DAB1,TBX20,DPF3,PRKCH,IL6R,TOX,LYN,OVOL2,NTN1,ZFH3,ARID1B,SNAI2,RASGRP1,CSF1,ASB4,SMAD5,MED1,IL33,ROR2,IL10,ACTR2,VSTM2A,MAP6,ZBTB7C,PCID2,TWIST1,JAK2,UFL1,NEDD9,OLFM4,STAT1,IMPACT,MYOCD,MEF2C,MAP3K5,FBXW8,SDCBP,EPHA4,NTRK2,IL1RAPL1,NUMB,ADAMTS9,CD101,FBXO31,CDH5,NFKBID,LAMB1,CYFIP1,SEMA4D,RUNX1,TNFSF11,HDAC2,MAPK9,GRM5,NRP1,PRKCA,FAIM,CHODL,POR,RAG1,CUX1,MACROH2A1,EPHB2,MYB,KALRN,LAMA1,TIAM2,BMP7,NUDT21,SLIT2,ROBO1,EFNA5,TCF12,LOXL2,STK3,HNRNPU,GLI2                                                                                                                                                                                                                                                                                                                                                                                                                                                                                                                                                                                                                                                                                                                                                                          |
| GO:0071310 | cellular response to organic substance           | 0.015428538346456477 | NOTCH2,BCAR3,BRINP3,MTOR,NSG1,NLK,ZNF236,PLCB1,PTPRA,ITPR2,RIPOR2,PDE4D,RDX,STXBP1,IL1RAPL2,BCL2,MYO5A,PRDM16,ALDH1A2,FBN1,ROBO2,GABRB3,ZEB1,AKR1C3,RARB,SPRED1,ALK,ERBIN,APC,CRKL,SOX5,PTPRJ,KDM4C,EGFR,ANGPT1,NCOR1,UGT3A2,NEDD4,BCL11A,SOX6,NTRK3,RXFP1,ZFAND6,FLT1,GABRB1,NEO1,PRKD1,PAK1,CHRM3,GRAMD1B,RAPGEF2,LRP2,RUNX2,FGF12,CPS1,ONECUT1,CPEB4,TMEM38B,UBE2L3,PTPRN2,SMYD3,RPTOR,GHR,COL4A2,HDAC9,IL1R1,APP,RPS6KA2,GABRG2,DOCK8,USP18,NTF3,NDUFAF2,ST18,SLC8A1,HERPUD2,KANK1,BMPR1B,PCSK6,AKAP6,HADHB,ARNT,RAB8B,PAK3,LARP1,RAP1GDS1,PRKCZ,GRB10,RYR3,DEFA3,DUSP22,YAP1,BRINP1,MAPK1,HRH2,PDGFD,UBE20,GFRA1,SLC16A1,SPIDR,GABPA,HRH4,MYLK3,GLP2R,PAFAH1B1,ATF6,TM7SF3,ITGB8,HIVEP1,CTNNA1,AKAP9,KLF15,PPARA,ERMP1,NR5A2,ADAMTS3,PTPRK,TRERF1,DAPK1,TMEM108,JARID2,IL34,BCAS3,RYR2,BBS2,WNT9B,SMARCA4,USP8,MBD5,PTPRT,ELAVL4,ABL1,PTPN12,HDAC4,SLC1A1,PRKAA1,NFAT5,RAP1A,FGF10,LATS2,ZNF675,PRKCE,ESRRG,DENND4C,FBN2,CD44,PDE3A,EXT1,SPRED2,PTPN2,TRIM5,ATXN3,HTR2C,LTBP1,ZFYVE9,OPRM1,HTR2A,ALPL,GNAL,EPN2,NOS2,GBP6,CCND3,IL17RA,CRIM1,FBXO32,TJP1,LDLRAD4,BLM,BMP2,PSG9,SOGA1,MSR1,GNAI1,TBC1D4,LEMD3,HMGB1,FGF9,SLC23A2,ZNF106,TRAF3,UNC13B,DSTYK,RAP1GAP,CCDC186,CGAS,SMARCC1,SNX6,SMOC2,IDE,GAREM1,ATF2,CYLD,UMODL1,BBS4,MX1,CFTR,RGMB,UBR1,CHRM5,SLC30A10,RORB,SELENON,PTPRE,PRKN,TBX20,ARID5B,IL6R,NLRC5,SNX25,RALB,ROCK1,LYN,VCAM1,CTSB,DTX1,OVOL2,RRAGD,ARID1B,INSR,YTHDF3,SNAI2,UFD1,RXRG,ERN2,MBTPS2,FLNB,NREP,ZDHHC17,JCAD,SAMHD1,ENPP1,BMP5,CSF1,BCL2L1,SERPINB9,HCN1,GRB14,SMAD5,MED1,IL33,KL,IL10,ACTR2,PTH,SOSTDC1,PRKAA2,CSF2RB,PACRG,ABHD2,VSTM2A,IQGAP1,YBX3,NRXN1,HIPK1,CD70,PBLD,FICD,CACYBP,PEG10,TWIST1,JAK2,FSTL1,CREBBP,UFL1,NFKBIA,PRKCB,ABCC8,ZC3H15,SMPD4,ATP2B1,ASS1,OTOP1,CIDEA,EXT2,STAT1,BRMS1L,NR2C1,MAP |

|            |                                                            |                      |                                                                                                                                                                                                                                                                                                                                                                                                                                                                                                                                                                                                                                                                                                                                                                                                                                                                                                                                                                                                                                                                                                                                                                                                                                                                                                                                                                                                                                                                                                                                                                                                                                                                                                                                                                                                                                                                                                                                                                                                                         |
|------------|------------------------------------------------------------|----------------------|-------------------------------------------------------------------------------------------------------------------------------------------------------------------------------------------------------------------------------------------------------------------------------------------------------------------------------------------------------------------------------------------------------------------------------------------------------------------------------------------------------------------------------------------------------------------------------------------------------------------------------------------------------------------------------------------------------------------------------------------------------------------------------------------------------------------------------------------------------------------------------------------------------------------------------------------------------------------------------------------------------------------------------------------------------------------------------------------------------------------------------------------------------------------------------------------------------------------------------------------------------------------------------------------------------------------------------------------------------------------------------------------------------------------------------------------------------------------------------------------------------------------------------------------------------------------------------------------------------------------------------------------------------------------------------------------------------------------------------------------------------------------------------------------------------------------------------------------------------------------------------------------------------------------------------------------------------------------------------------------------------------------------|
|            |                                                            |                      | <p>2K6,IMPACT,CCBE1,PARK7,MAPK8,ITGA4,MTF2,MYOCD,CYFIP2,ACACA,MEF2C,RXRA,WNT7A,RBPMS2,MAP3K5,OR10H2,PDE2A,SDCBP,SPPL2B,WWOX,NCK1,CXCL2,IFNAR1,EPHA4,NTRK2,COLEC12,IL17RD,PTK2,CDH5,CLDN18,DIAPH1,CYFIP1,UBE3A,ZBTB20,FAT4,WNT5B,AMFR,PTGFR,TNFSF11,FYN,HDAC2,DOK5,FUT8,TET1,ITGA8,GRM5,RPS6KA5,TBC1D1,PID1,NRP1,PRKCA,GBP4,RC3H1,NRIP1,POR,BCR,KIF16B,NSG2,GNA14,BMPER,EPHB2,STXB4,MAGI2,FLRT2,SLC1A2,GNAS,BMP7,PDGFC,ABL2,RFX2,SLIT2,CNOT7,ERBB4,IL20RB,ROBO1,PRKCQ,MGMT,NOS1,GLDC,EFNA5,GAS2L1,SLIT3,ESR1,CACNA2D1,PRLR,PIK3R3,FER,CCR2,EPS8,HRH1,ROCK2,RORA,RGS8,RAB31,HERPUD1,NG2,PNPLA3,ZNF423,HNRNPU,IGF1R,GLI2,THRB</p>                                                                                                                                                                                                                                                                                                                                                                                                                                                                                                                                                                                                                                                                                                                                                                                                                                                                                                                                                                                                                                                                                                                                                                                                                                                                                                                                                                                          |
| GO:0045596 | negative regulation of cell differentiation                | 0.015484228103370301 | <p>CNTN4,ULK2,ZNF536,ZFPM2,FBN1,ZEB1,RARB,SPRED1,USH2A,FOXJ2,EGFR,CDK12,BCL11A,SOX6,TMEM182,NTRK3,EPHA7,RAPGEF2,APP,SEMA5A,KANK1,DIP2B,ITPKB,TRPC5,ABCA5,YAP1,BRINP1,MAPK1,GABPA,EFEMP1,NF2,CTNNA1,PPARA,MEIS2,PRTG,SEMA3C,ADGRV1,RANBP3L,SEMA6D,SMARCA4,TNR,HDAC4,GLIS1,FGF10,ASPM,ZBTB16,ZNF675,TRIO,LIMD1,SPRED2,PTPN2,SEMA3E,ANKRD17,BICRAL,MBP,CRIM1,LDLRAD4,SEMA3A,BMP2,RC3H2,SEMA3D,HMGB1,FGF9,NFATC2,ANKRD26,RAP1GAP,DRAXIN,SMARCA2,GLI3,SMARCC1,MAP2,COL5A1,DCC,RORB,DAB1,LYN,DTX1,OVOL2,NTN1,ZFH3,DPYSL5,SNAI2,TWIST2,ENPP1,BMP5,CTDP1,ABCG1,PRAME,TNN,MED1,LMX1A,TMEM178A,PRAMEF25,PTH,SOSTDC1,ANP32B,TWIST1,MELTF,NFKBIA,ABCC8,STAT1,PRAMEF2,MYOCD,WNT7A,RBPMS2,EPHA4,IL17RD,CLDN18,SEMA4D,RUNX1,GPR55,GPR137B,EPHB1,NRP1,RC3H1,FBLN1,EPHB2,MYB,BMP7,DDX6,PBX1,EFNA5,SEMA4B,RORA,HOK3,FSTL4,HNRNPU,GLI2</p>                                                                                                                                                                                                                                                                                                                                                                                                                                                                                                                                                                                                                                                                                                                                                                                                                                                                                                                                                                                                                                                                                                                                                                                                 |
| GO:0051172 | negative regulation of nitrogen compound metabolic process | 0.016164841520431364 | <p>NOTCH2,SPOCK1,WWC1,FTO,PLCB1,ZNF536,ZFPM2,L3MBTL4,TNRC6B,PDE4D,PRDM16,CHRNA7,ZEB1,RARB,SPRED1,MINAR1,CDDL2,GLIS3,SPON1,APC,TSHZ3,RTN1,CRKL,PTPRJ,KDM4C,EGFR,RFX3,USP14,ANGPT1,BACH1,NCOR1,NEDD4,SCAI,BCL11A,SOX6,NTRK3,C5,THRAP3,CAST,SLC8A3,NCOA7,SPEN,RUNX2,CPEB4,LDB2,SMYD3,HDAC9,ZHX3,ATF7IP,APBB2,APP,SAMSN1,KDM1B,NTF3,PARP15,PARN,SLC8A1,SERPINA6,FMN2,LARP1,NBN,PRKCZ,TAF15,MSH6,MCPH1,PHF19,DUSP22,YAP1,MGAT5,ITIH5,USP25,UBE20,SFMBT2,NIPBL,GABPA,CARD18,STK38,PTPN13,ZNF684,DCAF1,NF2,HIVEP1,BIRC6,KLF15,PPARA,MEIS2,NFIB,PTPRK,TRERF1,DAPK1,AGO2,PHC3,JARID2,GATAD2B,ZNF846,DUSP16,SMARCA4,PARD3,TNRC6C,PIAS1,ATRX,PTPRT,ELAVL4,ABL1,MXI1,HDAC4,OXR1,PRKAA1,CREG1,L3MBTL3,NBAS,PSMF1,SLFN11,GLIS1,MORC1,LATS2,NRG1,ZNF438,ZBTB16,ZNF675,SETDB2,PRKCE,FOXK2,NXN,CD44,PTPRO,LIMD1,PBX1,SPRED2,RPS6KA3,PTPN2,RFC1,OPRM1,DAZL,TAF3,FHL2,PUM1,MSH2,IGF2BP3,ZNF397,HIPK3,CDKN2C,NOS2,RBBP8,MDFIC,HMGA2,CCND3,CREM,TRPS1,CRIM1,PRR5L,MYT1L,LDLRAD4,SNX3,BRCA2,ZBTB2,BLM,BMP2,RC3H2,ZC3H14,GF11B,HMGB1,GNAQ,FGF9,NFATC2,SH3BP5,CPAMD8,ETS2,ZNF875,UIMC1,LRRFIP1,SMARCA2,GLI3,CGAS,SMARCC1,SNX6,CNKS3,ZNF431,RERE,BTAF1,ATF2,HIRA,MAPK8IP1,NELL1,MRPL13,RORB,PRKN,ZNF608,TBX20,DACH1,ZNF541,DPF3,GRIN2A,ARID5B,ATXN1,PKP1,CNOT6L,SNX25,PTPRB,ZFP90,ZNF124,USP7,PLAGL1,SOX30,ROCK1,LYN,CTSB,ZNF169,TENM2,OVOL2,ZBTB33,ZFH3,BANP,YTHDF3,DEDD2,SNAI2,SIAH2,SP3,ERN2,ELF2,NSD2,TWIST2,ENPP1,CSNK2A1,SERPINB9,SCAF4,FANCB,SMAD5,CELF4,TCERG1,FOXN3,PRAME,MED1,IL33,BANK1,CSDE1,IL10,SFPQ,SCML2,PRAMEF25,PRKAA2,ETV6,CAMLG,SREBF2,YBX3,PCID2,FRY,TWIST1,ZBTB38,PATL1,CREBBP,TNKS,PCNA,UFL1,RTRAF,ZBTB21,ZBTB49,AGO1,STAT1,BRMS1L,NR2C1,PRAMEF2,IMPACT,PARK7,POU1F1,MTF2,NCAPG2,FOXP2,MYOCD,MEF2C,ADGRB1,RXRA,NDFIP1,SERPINI2,PRDM13,MAGEL2,PDE2A,SDCBP,ZBTB25,MLLT1,NCK1,SCAF8,RNF8,EPHA4,MECOM,DNMT3L,NTRK2,LHX9,ZBTB10,OCLN,IRESB2,ASCL3,SEMA4D,SERPINB10,ZBTB20,RUNX1,KIRREL1,SAMD13,PDCL3,SRP9,NSUN2,TNFSF11,FYN,KDM5A,PCBP3,ZNF705G,PPM1F,HDAC2,GON4L,TBX15,PSME3IP1,ZFYVE28,PABPC1,TET1,SPOPL,ZNF705D,RPS6KA5</p> |

|            |                                              |                      |                                                                                                                                                                                                                                                                                                                                                                                                                                                                                                                                                                                                                                                                                                                                                                                                                                                               |
|------------|----------------------------------------------|----------------------|---------------------------------------------------------------------------------------------------------------------------------------------------------------------------------------------------------------------------------------------------------------------------------------------------------------------------------------------------------------------------------------------------------------------------------------------------------------------------------------------------------------------------------------------------------------------------------------------------------------------------------------------------------------------------------------------------------------------------------------------------------------------------------------------------------------------------------------------------------------|
|            |                                              |                      | <i>,PID1,MIDEAS,FHIT,KLF12,RC3H1,NRIP1,POR,TUT4,FBLN1,RAG1,CUX1,MACROH2A1,MITF,EPHB2,CD38,ZNF705B,SERPINB2,ATG5,PRDM11,UNK,MLIP,MYB,MFHAS1,SERPINB7,BMP7,TNF AIP8,ZMYND8,KCTD1,BPTF,ZMYND11,DDX6,BACE2,PARPBP,SLIT2,CNOT7,SERPINB11,SAMD4A,SHLD2,NSD1,EHMT1,ESR1,KDM4B,LOXL2,AGO3,A2M,JAZF1,ZNF891,SPOCK3,PHC2,ROCK2,PRDM1,DMRT1,COL4A3,BARD1,DEPTOR,ZNF423,ZNF568,HNRNPU,PRKAG2,GLI2,THRB</i>                                                                                                                                                                                                                                                                                                                                                                                                                                                                |
| GO:0043010 | camera-type eye development                  | 0.016178719428165577 | <i>NOTCH2,BCAR3,SCAPER,RP1,ALDH1A2,FBN1,TENM3,ZEB1,SPRED1,DSCAM,EGFR,CRB1,ATP2B2,FLT1,CACNA1C,DCLK1,BMPR1B,FAT3,EFEMP1,NF2,WNT9B,SMARCA4,SLC1A1,TLL5,FGF10,FBN2,SPRED2,NHS,ATP8A2,BCL11B,NPHP4,WDPCP,PDE6C,TDRD7,MDM1,GLI3,MEGF11,BBS4,LAMC3,RORB,PDE6A,SP3,HCN1,CELF4,VSTM4,MED1,FAT1,HIPK1,TWIST1,VSX1,USH1C,ATP2B1,SHROOM2,WNT7A,NECTIN1,NTRK2,WNT2B,WNT5B,UNC45B,HDAC2,XRN2,EPHB1,RP1L1,NRP1,SDK1,B9D1,MITF,EPHB2,LAMA1,BMP7,MYH15,SLC6A3,RPGRI1,THRB</i>                                                                                                                                                                                                                                                                                                                                                                                                 |
| GO:0150115 | cell-substrate junction organization         | 0.01620772359194752  | <i>DLC1,PTPRA,BCL2,PTPRJ,MACF1,MAPRE2,VCL,MAP4K4,RAB8B,DUSP22,CORO2B,LIMCH1,FMN1,PTPRK,BCAS3,DST,ABL1,PEAK1,ARHGEF7,IQSEC1,WDPCP,LAMC1,ROCK1,ITGA6,PTK2,PPM1F,NRP1,BCR,EFNA5,ROCK2</i>                                                                                                                                                                                                                                                                                                                                                                                                                                                                                                                                                                                                                                                                        |
| GO:0043269 | regulation of ion transport                  | 0.01628758243241906  | <i>CACNA2D3,KCNH5,DPP10,PDE4D,STXBP1,BCL2,KCNMA1,ANO6,CACNG2,NEDD4,PRKD1,CHRM3,FGF12,TMEM38B,GRM7,THADA,NEDD4L,APP,CACNA1C,CACNB2,TMC1,SYT1,SLC8A1,KCNE4,AKAP6,HOMER2,KCNK10,CLIC6,HECW1,KCNJ1,SYT10,LRR38,AKAP9,RASGRF2,KCNS3,PLA2R1,DAPK1,SCN2A,ANK2,RYR2,NKAIN3,ABL1,PRKAA1,KCNH1,NKAIN2,GSG1L,RASGRF1,PRKCE,SLMAP,WNK2,EGF,ABCC9,ALG10B,OPRM1,HTR2A,CYP4A11,STAC,CNIH3,KCND2,ANK3,CNTN1,CACNA1I,KCNJ15,SCN11A,NETO2,RELN,KCNH8,CNKSR3,CFTR,SLC30A10,SELENON,PRKN,GRIN2A,JPH1,KCNQ3,SHISA9,SCN10A,KCND3,LYN,CRACR2A,PLPP4,UTRN,KCNC1,HCN1,GRIN2B,KCNK5,PLA2G4A,NRXN1,TWIST1,ABCC8,CACNA1E,ATP2B1,SLC6A1,MAP2K6,KCNJ18,CEMIP,PARK7,ADCYAP1R1,EFHB,MEF2C,SHISA6,DIAPH1,NOS1AP,TNFSF11,FYN,SCN8A,NALCN,HECW2,GRM5,ATPCKMT,KCNJ6,DPP6,EPHB2,TSPAN13,CACNG3,ATG5,VMP1,KCNIP4,TRDN,NLGN1,NOS1,ASIC2,KCNQ5,CACNA2D1,HTT,CCR2,IL16,CATSPER2,RGS7,CLDN10,KCNAB1</i> |
| GO:0010720 | positive regulation of cell development      | 0.017149413872875444 | <i>MTOR,PTPRD,TENM4,BCL2,ROBO2,CARMIL1,DSCAM,CRKL,RFX3,MACF1,BCL11A,CDH4,SPEN,LRP2,STAU2,SEMA5A,AURKA,PAK3,TRPC5,PAFAH1B1,SYNJ1,TIAM1,IL34,ABL1,ASPM,PDE3A,PLXNA2,ARHGEF7,OPRM1,DOCK5,DISC1,BMP2,RELN,DOCK1,NIN,GLI3,PRKCH,LYN,NTN1,IL33,ACTR2,MAP6,UFL1,NEDD9,OLFM4,FBXW8,EPA4,NTRK2,IL1RAPL1,NUMB,FBXO31,CDH5,CYFIP1,SEMA4D,TNFSF11,HDAC2,GRM5,NRP1,FAIM,CHODL,CUX1,EPHB2,KALRN,TIAM2,SLIT2,ROBO1,EFNA5</i>                                                                                                                                                                                                                                                                                                                                                                                                                                                 |
| GO:0060997 | dendritic spine morphogenesis                | 0.01766571156400133  | <i>DOCK10,STAU2,ARHGAP44,PAK3,DNM3,DIP2A,PAFAH1B1,CTNND2,PDLIM5,RELN,NGEF,TANC2,ACTR2,WNT7A,EPA4,UBE3A,EPHB1,EPHB2,PPFIA2,KALRN,NLGN1</i>                                                                                                                                                                                                                                                                                                                                                                                                                                                                                                                                                                                                                                                                                                                     |
| GO:1904062 | regulation of cation transmembrane transport | 0.017938562260802596 | <i>DPP10,PDE4D,BCL2,ANO6,CACNG2,NEDD4,PRKD1,FGF12,TMEM38B,THADA,NEDD4L,APP,CACNA1C,CACNB2,TMC1,SLC8A1,KCNE4,AKAP6,HECW1,LRR38,AKAP9,RASGRF2,DAPK1,ANK2,RYR2,ABL1,GSG1L,RASGRF1,PRKCE,SLMAP,WNK2,ABCC9,ALG10B,OPRM1,STAC,CNIH3,ANK3,NETO2,RELN,CNKSR3,SELENON,GRIN2A,JPH1,SHISA9,LYN,CRACR2A,UTRN,KCNC1,HCN1,GRIN2B,NRXN1,TWIST1,ABCC8,CEMIP,PARK7,ADCYAP1R1,MEF2C,SHISA6,DIAPH1,NOS1AP,FYN,HECW2,ATPCKMT,DPP6,EPHB2,TSPAN13,CACNG3,ATG5,VMP1,KCNIP4,TRDN,NLGN1,NOS1,CACNA2D1,HTT,CCR2,RGS7,KCNAB1</i>                                                                                                                                                                                                                                                                                                                                                         |
| GO:0033043 | regulation of organelle                      | 0.018241915291361422 | <i>NOTCH2,MTOR,PTPRD,PLCB1,SVIL,DLC1,RIPOR2,RDX,RP1,STXBP1,RALA,SPIRE1,SDCCAG8,CDC42EP3,CARMIL1,RHPN2,MAP4,APC,NEK7,NSMCE2,NTRK3,PSMA8,CRACD,SLC39A12,TOM1L2</i>                                                                                                                                                                                                                                                                                                                                                                                                                                                                                                                                                                                                                                                                                              |

|            |                                         |                             |                                                                                                                                                                                                                                                                                                                                                                                                                                                                                                                                                                                                                                                                                                                                                                                                                                                                                                                                                                                                                                                                                                                                                                                                                                                                                                                                                                                                                                                                                                                                                                                                                                                                                                                                                                                                                                                                                                                                                                                                                                                                                                                                                                                                                                                                                                                                                                                                                                                                                                                                                                                                                                                                                                                     |
|------------|-----------------------------------------|-----------------------------|---------------------------------------------------------------------------------------------------------------------------------------------------------------------------------------------------------------------------------------------------------------------------------------------------------------------------------------------------------------------------------------------------------------------------------------------------------------------------------------------------------------------------------------------------------------------------------------------------------------------------------------------------------------------------------------------------------------------------------------------------------------------------------------------------------------------------------------------------------------------------------------------------------------------------------------------------------------------------------------------------------------------------------------------------------------------------------------------------------------------------------------------------------------------------------------------------------------------------------------------------------------------------------------------------------------------------------------------------------------------------------------------------------------------------------------------------------------------------------------------------------------------------------------------------------------------------------------------------------------------------------------------------------------------------------------------------------------------------------------------------------------------------------------------------------------------------------------------------------------------------------------------------------------------------------------------------------------------------------------------------------------------------------------------------------------------------------------------------------------------------------------------------------------------------------------------------------------------------------------------------------------------------------------------------------------------------------------------------------------------------------------------------------------------------------------------------------------------------------------------------------------------------------------------------------------------------------------------------------------------------------------------------------------------------------------------------------------------|
|            | organizational                          |                             | , PAK1, SEPTIN9, TBCD, ATF7IP, RPS6KA2, STAU2, MAPRE2, SEMA5A, SYT1, ARHGAP44, NTF3, CD2AP, AURKA, PARN, KANK1, CTNNA2, PAK3, RAP1GDS1, NBN, MCPH1, SENP6, YAP1, MAPK1, CORO2B, MYLK3, LIMCH1, FMN1, PAFAH1B1, VPS13D, TPM1, NF2, AKAP9, SNX30, SYNJ1, NAV3, VPS13C, BCAS3, SYNE2, SMARCA4, ATRX, ABL1, PRKAA1, GRID2, INO80D, CLIP1, SETDB2, PRKCE, EGF, PDE3A, MTMR3, CLEC16A, ARHGEF7, AMBRA1, SEMA3E, MARK2, TMEM67, C10ORF90, TMOD2, MNAT1, TGFA, TJP1, WDPCP, GNAI1, TBC1D4, RESF1, MDM1, SLAMF1, SMARCA2, SMARCC1, KIF15, MAP2, CYLD, BBS4, YLPM1, PRKN, AFAP1, DPF3, CNOT6L, KANK4, USP7, RALB, ROCK1, ARHGAP28, ARID1B, INSR, BMF, NEK6, DDHD1, ARFGEF1, PDE4DIP, BID, FYCO1, SH3GLB1, SNX9, ANAPC1, HDGFL3, BCL2L1, INO80, SF PQ, PRKAA2, SKA1, NDC80, MAP6, VASP, IQGAP1, MORC2, SREBF2, NRXN1, PCID2, CENPE, TNKS, NEDD9, GAP43, SAR1A, MTPN, PARK7, MAPK8, CEP120, CYFIP2, MAP3K4, WASF3, MAGEL2, RAD51AP1, PDE2A, SDCBP, NSMCE1, NCK1, CDCA8, OCLN, PTK2, MARK4, CDH5, DIAPH1, FEZ2, CYFIP1, KIRREL1, SAXO1, ASAP1, CCDC88A, ADAMTS16, BICD1, BUB1, PPM1F, SLF1, MAPK9, HECW2, CDH2, ADCK1, SP TB, PID1, NRP1, FCHSD2, MACROH2A1, TOGARAM1, MET, ATG5, BMP7, ABL2, FHOD3, SLIT2, NUF2, PRKCQ, EFNA5, GAS2L1, IQCJ-SCHIP1, HTT, FER, CHFR, EPS8, ROCK2, ATAT1, DMRT1, CDCA5, WASHC1, HNRNPU, RAB3GAP2, AKAP13, DNMI1L                                                                                                                                                                                                                                                                                                                                                                                                                                                                                                                                                                                                                                                                                                                                                                                                                                                                                                                                                                                                                                                                                                                                                                                                                                                                                                                                                                                  |
| GO:0051246 | regulation of protein metabolic process | 0.01923<br>1403909<br>33108 | BCAR3, MTOR, SPOCK1, FTO, KSR1, PLCB1, DLC1, TNRC6B, PDE4D, RDX, BCL2, CHRNA7, SPRED1, MINAR1, ALK, AUTS2, EGLN3, SPON1, APC, RTN1, CRKL, TNK1, PTPRJ, KDM4C, EGFR, USP14, ANGPT1, CDK12, PRKACB, NEDD4, MTRF1, NTRK3, C5, FLT1, CAST, SLC8A3, PRKD1, PAK1, EPHA7, NCOA7, RAPGEF2, PELI2, LRP2, TAOX3, LDLRAD3, CPEB4, UBE2L3, PUM3, SMYD3, RPTOR, GHR, NEDD4L, APP, RPS6KA2, SAMS1, NTF3, ACER2, AURKA, PARN, ST18, SLC8A1, SERPINA6, PLGRKT, BMPR1B, FMN2, ARNT, DIP2B, LARP1, ITPKB, TRPC5, NBN, IFT57, PRKCZ, SPOP, DIP2A, HECW1, PHF19, DUSP22, WDR70, MAPK1, MGAT5, ITIH5, USP25, KMT2E, PDGFD, NRG3, UBE2O, GFRA1, NIPBL, CARD18, STK38, PTPN13, KANSL1, LIMCH1, CCNG2, NF2, MOB3B, BIRC6, AKAP9, KLF15, PPP6R3, EIF3D, DAPK1, AGO2, JARID2, IL34, WNT9B, CLPX, DUSP16, USP8, PARD3, MAPKAP1, TNRC6C, PIAS1, ATRX, NUA1, PTPRT, ELAVL4, ABL1, HDAC4, OXR1, SLC1A1, PRKAA1, MRPS27, PSMF1, RAP1A, FGF10, LATS2, NRG1, MUSK, ZNF675, PRKCE, SLC3A1, NXN, CD44, PTPRO, EGF, PRRC1, SPRED2, RPS6KA3, PTPN2, ATXN3, ALG10B, AMBRA1, HTR2A, FANCM, DAZL, MARK2, PUM1, IGF2BP3, SLC2A13, HIPK3, CDKN2C, KNDC1, SPSB4, CLSPN, NOS2, MNAT1, HMGA2, CCND3, MBP, PLCE1, TGFA, HIP1, CRIM1, PRR5L, LDLRAD4, CNTN1, SNX3, DISC1, BLM, BMP2, RC3H2, RANBP9, RELN, HMGB1, GNAQ, FGF9, SH3BP5, CPAMD8, TRAF3, GEMIN5, SMARCC1, SNX6, CNKSR3, IDE, NEK10, MOB1B, ATF2, UMODL1, MAPK8IP1, NELL1, MRPL13, KITLG, CAMTA1, RCAN1, TADA2A, DAB1, RB1CC1, PRKN, GRIN2A, IL6R, ALS2, ACO1, CNOT6L, MKNK1, SNX25, PTPRB, COPS8, USP7, RALB, ROCK1, LYN, CTSB, BZW1, PIWIL3, BANP, INSR, YTHDF3, HECTD1, SUMO2, SNAI2, BID, SIAH2, TRABD2B, ERN2, CARD10, CTIF, ENPP1, RASGRP1, SNX9, CSNK2A1, BMP5, CSF1, SERPINB9, GRIN2B, CELF4, ABCG1, DCUN1D4, CDC14B, IL33, GPRC5C, ROR2, BANK1, CSDE1, IL10, PRKAA2, LARP6, IQGAP1, CAMLG, ANP32B, YBX3, NRXN1, PCID2, FRY, CENPE, NGDN, TWIST1, ALKAL2, JAK2, MADD, PATL1, MELTF, UFL1, NFKB1A, RTRAF, BRD4, NEDD9, AGO1, NDFIP2, MAP2K6, MTPN, ABI1, CEMIP, IMPACT, CCBE1, PARK7, MAPK8, OAZ2, UBL7, MTF2, NCAPG2, MYOCD, CYFIP2, MEF2C, ADGRB1, WNT7A, MAP3K5, NDFIP1, MAP3K4, SERPINI2, DBF4B, FBXW8, SDCBP, PASK, MLLT1, NCK1, FGR, CDCA8, PPP2R3A, EPHA4, NTRK2, OCLN, IREB2, PTK2, CDH5, CYFIP1, UBE3A, SEMA4D, SERPINB10, RUNX1, KIRREL1, POMT2, NOS1AP, PDCL3, SRP9, CCDC88A, TNFSF11, FYN, KDM5A, PPM1F, HDAC2, SH2D3C, PSME3IP1, DOCK3, TRNAU1AP, ZFYVE28, MAPK9, PABPC1, TET1, HECW2, FBXL20, GRM5, SPOPL, RPS6KA5, PID1, NRP1, FHIT, ITGA1, RC3H1, POR, TUT4, TM9SF2, ELP2, FBLN1, RAG1, BMPER, MACROH2A1, EPHB2, BCL2L13, DPH6, SPPL3, SERPINB2, ATG5, MAGI2, UNK, MYB, MFHAS1, SERPINB7, DHX29, BMP7, TNFAIP8, RNF217, DDX6, PDGFC, BACE2, NECAB1, SLIT2, CNOT7, ERBB4, SERPINB1 |

|            |                                                          |                      |                                                                                                                                                                                                                                                                                                                                                                                                                                                                                                                                                                                                                                                                                                                                                                                                                                                                                                                                                                                                                                                                                               |
|------------|----------------------------------------------------------|----------------------|-----------------------------------------------------------------------------------------------------------------------------------------------------------------------------------------------------------------------------------------------------------------------------------------------------------------------------------------------------------------------------------------------------------------------------------------------------------------------------------------------------------------------------------------------------------------------------------------------------------------------------------------------------------------------------------------------------------------------------------------------------------------------------------------------------------------------------------------------------------------------------------------------------------------------------------------------------------------------------------------------------------------------------------------------------------------------------------------------|
|            |                                                          |                      | 1,GSAP,ROBO1,SAMD4A,ANTXR1,MGMT,NOS1,PRR16,EFNA5,NSD1,KDM4B,PRLR,AGO3,HTT,PIK3R3,FER,A2M,CHFR,SPOCK3,ROCK2,EIF4G3,PSMD2,HERPUD1,COL4A3,WASHC1,BARD1,STK3,DEPTOR,HNRNPU,RAB3GAP2,PRKAG2,AKAP13                                                                                                                                                                                                                                                                                                                                                                                                                                                                                                                                                                                                                                                                                                                                                                                                                                                                                                 |
| GO:1902533 | positive regulation of intracellular signal transduction | 0.021479761270144067 | NOTCH2,BCAR3,WWC1,KSR1,PLCB1,CHRNA7,AKR1C3,SPRED1,ALK,AUTS2,PJA2,ERBIN,CRKL,TNFK,PTPRJ,EGFR,ANGPT1,NEDD4,NTRK3,FLT1,MAPKBP1,DGKI,EDAR,PRKD1,PAK1,RAPGEF2,PELI2,LRP2,TAOK3,RPTOR,GHR,APP,MAPRE2,SEMA5A,NTF3,MAP4K4,AKAP6,ITPKB,PRKCZ,DUSP22,PDGFR,GRM1,PLA2R1,IL34,ADGRV1,ABL1,NFAT5,GUCY1A2,RAP1A,FGF10,ZC3HAV1,NRG1,DENND2B,RASGRF1,PRKCE,CD44,EGF,SPRED2,PTPN2,TRIM5,MCF2L,HTR2C,CLEC16A,OPRM1,HTR2A,SEMA3E,PUM1,ANKRD17,RELL1,PLCE1,TGFA,HIP1,PRR5L,SEMA3A,BMP2,RC3H2,RELN,HMGB1,TRAF3,DSTYK,SLAMF1,GAREM1,NEK10,MAPK8IP1,KITLG,CAMTA1,SLC30A10,RB1CC1,PRKN,IL6R,ALS2,ROCK1,LYN,SLC44A2,RRAGD,CRACR2A,INSR,NEK6,BID,ERN2,TIAL1,ZDHHC17,JCAD,RASGRP1,CSF1,ROR2,KL,BANK1,SFPQ,NDC80,IQGAP1,NRXN1,PCID2,NET1,AKT3,ALKAL2,JAK2,MADD,HCTR1,PRKCB,BRD4,NDFIP2,MAP2K6,PARK7,ADCYAP1R1,MEF2C,WNT7A,MAP3K5,NDFIP1,MAP3K4,S100B,SDCBP,NCK1,FGR,CDCA8,EPHA4,NTRK2,PTK2,ANKRD6,UBE3A,SEMA4D,NENF,NOS1AP,GPR55,TNFSF11,FYN,DOK5,APELA,ROR1,CDH2,RAD9A,GPR137B,GRM5,NRP1,PRKCA,ITGA1,RC3H1,BMPER,MET,SPPL3,CDH13,GNAS,MFHAS1,DLG5,PDGFR,ERBB4,ROBO1,NLGN1,IQCJ-SCHIP1,AGO3,ROCK2,STK3,IGF1R,AKAP13,DNM1L |
| GO:0034332 | adherens junction organization                           | 0.022260478980711047 | RDX,CDH8,TBCD,ADAM10,VCL,CDH7,CDH11,CDH18,CDHR3,CDH20,TJP1,HIPK1,EPHA4,NUMB,CDH5,CDH9,CDH12,DLG5,FER                                                                                                                                                                                                                                                                                                                                                                                                                                                                                                                                                                                                                                                                                                                                                                                                                                                                                                                                                                                          |
| GO:0008015 | blood circulation                                        | 0.022790994865161562 | MTOR,SGCD,IMMP2L,ZDHHC21,PDE4D,KCNMA1,NAV2,ENPEP,PTPRJ,ANGPT1,CTNNA3,MYOF,FLI1,ATP2B2,SLC8A3,CHRM3,FGF12,CPS1,TMEM38B,CELF2,NEDD4L,RPS6KA2,CACNA1C,CACNB2,SLC8A1,KCNE4,RAP1GDS1,RNLS,HRH2,CORO2B,MYLK3,TPM1,CORIN,AKAP9,PPARA,ANK2,RYR2,BBS2,CXADR,DOCK4,ABL1,HDAC4,SLC1A1,PTPRO,ABCC9,PDE3A,EXT1,LNPEP,HTR2A,CYP4A11,NOS2,SGCZ,MYLK2,EMILIN2,DOCK5,F5,ECE1,TJP1,ARHGAP42,BBS4,TBX20,SCN10A,KCND3,ROCK1,HCN1,PRKG1,SMAD5,VSTM4,KL,JAK2,PTGS1,ABCC8,ATP2B1,EXT2,STAT1,MAP2K6,PDE2A,TNNI1,OCN,CDH5,NOS1AP,ADAMTS16,APELA,ASB3,ITGA1,BCR,SGCG,CD38,ATG5,SLIT2,TRHDE,TRDN,NOS1,ASIC2,CACNA2D1,HRH1,ROCK2,COL4A3,THRB,DNM1L                                                                                                                                                                                                                                                                                                                                                                                                                                                                        |
| GO:0061061 | muscle structure development                             | 0.024486282252023407 | MTOR,SGCD,NEBL,PLCB1,SVIL,ZFPM2,RIPOR2,BCL2,ZEB1,RARB,MYOF,SOX6,TMEM182,LARGE1,LRP2,ADGRB3,SMYD3,HDAC9,SLC8A1,AKAP6,MRTFA,PLG,MYLK3,MBNL1,TPM1,RBFOX1,PPARA,MRTFB,ALPK2,DYSF,ANK2,TANC1,RYR2,RANBP3L,SMARCA4,LDB3,CXADR,XIRP2,HDAC4,PRKAA1,KCNH1,FGF10,NRG1,SYNE1,PGM5,ALPK3,FHL2,TMOD2,ANKRD17,LUC7L,EVC,AFG3L2,SGCZ,ADAM12,MYLK2,MYOM2,PDLIM5,DNER,BMP2,PTCD2,FGF9,NFATC2,SMARCA2,SMARCC1,MYEF2,LAMC1,HIRA,HIVEP3,RCAN1,SELENON,TBX20,DPF3,ARID5B,JPH1,PTGFRN,ZFH3,ARID1B,RXRG,FLNB,CD9,UTRN,CTDP1,MED1,SOSTDC1,YBX3,TWIST1,ADAMTS5,SMTN,ALX4,ASS1,MEOX2,MTPN,MYO18B,ASB2,MYOC,D,MEF2C,ADGRB1,RBPMS2,MAP3K5,PPP2R3A,TNNI1,MEGF10,LAMB1,JAM2,WNT5B,SORBS2,UNC45B,COL19A1,CDH2,ITGA8,EPHB1,CHODL,SGCG,ATG5,NRAP,LAMA1,FHOD3,MYH15,NOS1,TCF12,RORA,HNRNPU,AKAP13                                                                                                                                                                                                                                                                                                                               |
| GO:0001944 | vasculature development                                  | 0.02522254155766406  | NOTCH2,SGCD,IMMP2L,TAF5,ZFPM2,ALDH1A2,CHRNA7,ROBO2,SPRED1,ENPEP,MYO1E,MINAR1,FOXJ2,RIN2,CRKL,SETD2,ARHGAP24,ANGPT1,C5,FLT1,ADAMTS6,SLC39A12,PRKD1,RAPGEF2,LRP2,ADGRB3,LUZP1,COL4A2,ADAM10,HDAC9,SEMA5A,THSD7A,CALD1,YAP1,MAPK1,PLG,PDGFR,ITGB8,SEMA3C,AGO2,BCAS3,COL22A1,ABL1,SLC1A1,RAP1A,FGF10,EGF,SEMA3E,ANKRD17,EPN2,ADAM12,EMILIN2,HMGA2,TGFA,TJP1,FGF9,NFATC2,ETS1,GLI3,SMOC2,ATF2,COL5A1,GT2I,TBX20,IL6R,PTPRB,VAV3,ROCK1,OVOL2,HECTD1,CARD10,JCAD,ASB4,CNMD,VSTM4                                                                                                                                                                                                                                                                                                                                                                                                                                                                                                                                                                                                                     |

|            |                                                   |                      |                                                                                                                                                                                                                                                                                                                                                                                                                                                                                                                                                                                                                                                                                                                                                                                                                                                                                                                                                                                                                                                                                                                                                                                                                                                                                                                                                                                                                                                                                                                                                                                                                                                                                                                                                                                                                                                                                                                                                                                                                                                                         |
|------------|---------------------------------------------------|----------------------|-------------------------------------------------------------------------------------------------------------------------------------------------------------------------------------------------------------------------------------------------------------------------------------------------------------------------------------------------------------------------------------------------------------------------------------------------------------------------------------------------------------------------------------------------------------------------------------------------------------------------------------------------------------------------------------------------------------------------------------------------------------------------------------------------------------------------------------------------------------------------------------------------------------------------------------------------------------------------------------------------------------------------------------------------------------------------------------------------------------------------------------------------------------------------------------------------------------------------------------------------------------------------------------------------------------------------------------------------------------------------------------------------------------------------------------------------------------------------------------------------------------------------------------------------------------------------------------------------------------------------------------------------------------------------------------------------------------------------------------------------------------------------------------------------------------------------------------------------------------------------------------------------------------------------------------------------------------------------------------------------------------------------------------------------------------------------|
|            |                                                   |                      | ,TNN,MED1,IL10,ANP32B,AIMP1,NRXN1,HIPK1,TWIST1,AKT3,SVEP1,PRKCB,ABCC8,AGO1,MEOX2,STAT1,MYO18B,CCBE1,MYOCD,MEF2C,ADGRB1,WNT7A,PDE2A,FBXW8,FLVCR1,NTRK2,ADAMTS9,HS6ST1,PTK2,CDH5,AP2B1,RUNX1,PDCL3,COL18A1,APELA,CDH2,EPHB1,NRP1,PRKCA,NRXN3,B9D1,BMPER,EPHB2,CDH13,LAMA1,SERPINB7,BMP7,ADGRF5,EYA1,SLIT2,ROBO1,ANTXR1,LOXL2,PIK3R3,CCR2,STARD13,ROCK2,PRDM1,RORA,HSPG2,COL4A3                                                                                                                                                                                                                                                                                                                                                                                                                                                                                                                                                                                                                                                                                                                                                                                                                                                                                                                                                                                                                                                                                                                                                                                                                                                                                                                                                                                                                                                                                                                                                                                                                                                                                            |
| GO:0014070 | response to organic cyclic compound               | 0.025437976649548846 | NSG1,LONP2,PLCB1,ITPR2,PDE4D,STXBP1,BCL2,ALDH1A2,GABRB3,AKR1C3,ALK,HLCS,KDM4C,EGFR,NCOR1,UGT3A2,NEDD4,PSMB2,NTRK3,GABRB1,PAK1,CHRM3,ADSS2,GRAMD1B,RAPGEF2,RUNX2,CPS1,TMEM38B,BCKDHB,UBE2L3,SMYD3,GHR,APP,KYNU,GABRG2,USP18,SLC8A1,AKAP6,HOMER2,PAK3,RFTN1,LARP1,RNLS,RYR3,DEFA3,YAP1,MAPK1,HRH2,ABCD3,PAPPA,SLC16A1,SPIDR,GABPA,HRH4,ACSBG1,CTNNA1,AKAP9,PPARA,TRERF1,RYR2,SMARCA4,USP8,EFTUD2,ELAVL4,ABL1,SLC1A1,PRKAA1,RAP1A,FGF10,PRKCE,ESRRG,ABCC9,P2RX6,PDE3A,HTR2C,RFNT2,OPRM1,HTR2A,ALPL,GNAL,MBP,FBXO32,BLM,AGL,BMP2,MSR1,GNAI1,ATF1,CGAS,ATF2,CFTR,CHRM5,SELENON,PRKN,SOX30,RALB,LYN,CRACR2A,SNAI2,RXRG,ENPP1,BCL2L1,HCN1,SMAD5,MED1,PPP2R2A,KL,IL10,ACTR2,PTH,ABHD2,JAK2,PCNA,UFL1,NFKB1A,ATP2B1,ASS1,CIDEA,SLC6A1,STAT1,NR2C1,IMPACT,PARK7,ADCYAP1R1,MEF2C,RXRA,WNT7A,OR10H2,PDE2A,DSG1,COLEC12,TPH2,DIAPH1,UBE3A,PTGFR,HDAC2,SDK1,NRIP1,POR,NSG2,GNA14,CD38,SLC1A2,GNAS,BMP7,PLIN2,SLIT2,MGMT,SLC6A3,GLDC,EFNA5,SLIT3,ESR1,A2M,HRH1,ROCK2,RORA,RGS8,GNG2,PNPLA3,HNRNPU,IGF1R,GLI2                                                                                                                                                                                                                                                                                                                                                                                                                                                                                                                                                                                                                                                                                                                                                                                                                                                                                                                                                                                                                                                                           |
| GO:0031324 | negative regulation of cellular metabolic process | 0.025820840500465316 | NOTCH2,MTOR,WWC1,FTO,PLCB1,ZNF536,ZFPM2,L3MBTL4,TNRC6B,PDE4D,BCL2,PRDM16,CHRNA7,ZEB1,AKR1C3,RARB,SPRED1,CDYL2,GLIS3,SPON1,APC,TSHZ3,RTN1,CRKL,PTPRJ,KDM4C,RFX3,USP14,ANGPT1,BACH1,NCOR1,NEDD4,SCAI,BCL11A,SOX6,NTRK3,THRAP3,SLC8A3,MALRD1,SPEN,RAPGEF2,RUNX2,CPEB4,LDB2,SMYD3,RPTOR,HDAC9,ZHX3,ATF7IP,APBB2,SAMSN1,KDM1B,NTF3,PARP15,PARN,SLC8A1,ABCD2,LARP1,NBN,PRK CZ,GRB10,TAF15,MSH6,MCPH1,PHF19,DUSP22,YAP1,MGAT5,SFMBT2,NIPBL,GABPA,STK38,PTPN13,ZNF684,DCAF1,NF2,HIVEP1,PPARA,MEIS2,NFIB,PTPRK,TRERF1,DAPK1,AGO2,PHC3,JARID2,DNAJC15,GATAD2B,ZNF846,DUSP16,SMARCA4,PARD3,TNRC6C,PIAS1,ATRX,PTPRT,ELAVL4,ABL1,MXI1,HDAC4,PRKAA1,CREG1,L3MBTL3,NBAS,SLFN11,GLIS1,MORC1,LATS2,NRG1,ZNF438,ABCB7,ZBTB16,ZNF675,SETDB2,FOXK2,PTPRO,LIMD1,PEX14,SPRED2,PTPN2,RFC1,CLEC16A,OPRM1,DAZL,TAF3,FHL2,PUM1,HERC1,MSH2,IGF2BP3,ZNF397,HIPK3,CDKN2C,RBBP8,MDFIC,HMGA2,CCND3,CREM,TRPS1,PRR5L,MYT1L,LDLRAD4,BRCA2,ZBTB2,BLM,BMP2,RC3H2,SOGA1,ZC3H14,GFI1B,HMGB1,GNAQ,FGF9,NFATC2,SH3BP5,ETS2,ZNF875,UIMC1,LRRFIP1,SMARCA2,GLI3,CGAS,SMARCC1,SNX6,CNKSR3,ZNF431,RERE,BTAF1,ATF2,HIRA,MAPK8IP1,MRPL13,SLC30A10,RORB,PRKN,MTMR2,ZNF608,TBX20,DACH1,ZNF541,DPF3,ARID5B,ATXN1,PKP1,CNOT6L,SNX25,PTPRB,ZFP90,ZNF124,USP7,PLAGL1,SOX30,ROCK1,LYN,ZNF169,TENM2,OVOL2,ZBTB33,ZFHX3,BMF,YTHDF3,DEDD2,SNAI2,SIAH2,SP3,ERN2,ELF2,NSD2,TWIST2,ENPP1,TMEM225,CSNK2A1,BMP5,BCL2L1,SCAF4,FANCB,SMAD5,CELF4,TCERG1,FOXP3,PRAME,MED1,IL33,BANK1,CSDE1,IL10,SFPQ,SCML2,PRAMEF25,ETV6,IQGAP1,CAMLG,SREBF2,YBX3,TWIST1,AKT3,ZBTB38,PATL1,CREBBP,TNKS,PCNA,RTRAFA,ZBTB21,ERLIN2,ZBTB49,AGO1,STAT1,BRMS1L,NR2C1,PRAMEF2,IMPACT,PARK7,POU1F1,MTF2,NCAPG2,FOXP2,MYOCD,MEF2C,RXRA,NDFIP1,PRDM13,MAGEL2,PDE2A,SDCBP,ZBTB25,PASK,MLLT1,NCK1,SCAF8,RNF8,MECOM,DNMT3L,NTRK2,LHX9,ZBTB10,OCLN,IREB2,ASCL3,FEZ2,SEMA4D,ZBTB20,RUNX1,KIRREL1,SAMD13,PDCL3,SRP9,NSUN2,TNFSF11,FYN,KDMSA,PCBP3,ZNF705G,PPM1F,HDAC2,GON4L,TBX15,ZFYVE28,PABPC1,TET1,ZNF705D,RPS6KA5,PID1,MIDEAS,FHIT,KLF12,RC3H1,NRIP1,BCR,TUT4,FBLN1,CUX1,MACROH2A1,MITF,EPHB2,CD38,MET,ZNF705B,ATG5,PRDM11,UNK,MLIP,MYB,MFHAS1,BMP7,ZMYND8,KCTD1,B |

|            |                                                      |                              |                                                                                                                                                                                                                                                                                                                                                                                                                                                                                                                                                                                                                                                                                                                                                                                                                                                                                                                                                                                                                |
|------------|------------------------------------------------------|------------------------------|----------------------------------------------------------------------------------------------------------------------------------------------------------------------------------------------------------------------------------------------------------------------------------------------------------------------------------------------------------------------------------------------------------------------------------------------------------------------------------------------------------------------------------------------------------------------------------------------------------------------------------------------------------------------------------------------------------------------------------------------------------------------------------------------------------------------------------------------------------------------------------------------------------------------------------------------------------------------------------------------------------------|
|            |                                                      |                              | <i>PTF, ZMYND11, DDX6, BACE2, PARPBP, SLIT2, CNOT7, SAMD4A, SHLD2, NSD1, EHMT1, ESR1, KDM4B, LOXL2, AGO3, JAZF1, ZNF891, PHC2, ROCK2, PRDM1, DMRT1, WASHC1, BARD1, DEPTOR, ZNF423, ZNF568, HNRNPU, PRKAG2, GLI2, THRB</i>                                                                                                                                                                                                                                                                                                                                                                                                                                                                                                                                                                                                                                                                                                                                                                                      |
| GO:0050771 | negative regulation of axonogenesis                  | 0.02744<br>8591467<br>411992 | <i>ULK2, BCL11A, EPHA7, SEMA5A, DIP2B, SEMA3C, SEMA6D, TNFR, SEMA3E, MBP, SEMA3A, SEMA3D, DRAXIN, MAP2, DCC, DAB1, NTN1, SEMA4D, NRP1, EPHB2, SEMA4B, FSTL4</i>                                                                                                                                                                                                                                                                                                                                                                                                                                                                                                                                                                                                                                                                                                                                                                                                                                                |
| GO:0090066 | regulation of anatomical structure size              | 0.02766<br>0625782<br>88965  | <i>MTOR, ULK2, SVIL, ZDHHC21, RDX, KCNMA1, CDC42EP3, CARMIL1, ANO6, DSCAM, MACF1, BCL11A, CDH4, CRACD, EPHA7, CHRM3, CPS1, RPTOR, SEMA5A, SLC8A1, KANK1, PAK3, DIP2B, TRPC5, RAP1GDS1, HRH2, FMN1, PAFAH1B1, SEMA3C, RAB22A, BBS2, WNT9B, SEMA6D, TNFR, DOCK4, ABL1, SLC12A8, PRKCE, EXT1, HTR2A, SEMA3E, TMOD2, DOCK5, ECE1, VAV1, DISC1, SEMA3A, RIN3, SEMA3D, ARHGAP42, PLS1, DRAXIN, MAP2, BBS4, DCC, RB1CC1, SLC12A1, ALS2, KANK4, VAV3, ROCK1, ARHGAP28, NTN1, ARFGEF1, SNX9, PRKG1, CLNS1A, VSTM4, VASP, AKT3, USH1C, ATP2B1, EXT2, MTPN, CYFIP2, WNT7A, NCK1, CYFIP1, SEMA4D, KIRREL1, SPTB, NRP1, FCHSD2, ITGA1, CD38, ATG5, FHOD3, SLIT2, NOS1, PRR16, ASIC2, EFNA5, FER, EPS8, SEMA4B, HRH1, ROCK2, FSTL4, DEPTOR</i>                                                                                                                                                                                                                                                                               |
| GO:0043549 | regulation of kinase activity                        | 0.03071<br>8755027<br>61471  | <i>MTOR, KSR1, SPRED1, ALK, APC, PTPRJ, EGFR, ANGPT1, CDK12, NTRK3, FLT1, SLC8A3, PRKD1, PAK1, EPHA7, RAPGEF2, TAOK3, LDB2, SMYD3, RPTOR, GHR, APP, NTF3, SLC8A1, BMPR1B, RANBP2, NBN, PRKCZ, MCPH1, DUSP22, PDGFD, NRG3, STK38, CCNG2, NF2, MOB3B, IL34, DUSP16, PTPRT, ABL1, SLC1A1, RAP1A, LATS2, NRG1, MUSK, ZNF675, CD44, PTPRO, EGF, PRRC1, PTPN2, AMBRA1, HTR2A, MARK2, EPHA6, HIPK3, CDKN2C, CLSPN, MNAT1, HMGA2, CCND3, PLCE1, TGFA, BLM, BMP2, RELN, GNAQ, SH3BP5, DSTYK, SNX6, NEK10, MOB1B, MAPK8IP1, KITLG, DAB1, PRKN, IL6R, ALS2, NLRC5, PTPRB, COPS8, VAV3, RALB, LYN, INSR, ERN2, CARD10, RASGRP1, SNX9, CSF1, GPRC5C, ROR2, IQGAP1, NRXN1, CENPE, ALKAL2, JAK2, MADR, RTRAF, NEDD9, MAP2K6, ABI1, CEMIP, PARK7, NCAPG2, MYOCD, MEF2C, MAP3K5, MAP3K4, DBF4B, MLLT1, FGR, EPHA4, NTRK2, PTK2, CCDC88A, TNFSF11, PPM1F, DOCK3, ZFYVE28, ROR1, EPHB1, GRM5, MACROH2A1, EPHB2, MET, BMP7, PDGFC, ERBB4, ROBO1, EFNA5, PRLR, HTT, PIK3R3, WASHC1, STK3, DEPTOR, HNRNPU, IGF1R, PRKAG2, AKAP13</i> |
| GO:0048639 | positive regulation of developmental growth          | 0.03254<br>7062482<br>80808  | <i>PLCB1, ZFPM2, BCL2, RIMS1, RIMS2, DSCAM, MACF1, BCL11A, CDH4, GHR, NEDD4L, SEMA5A, SYT1, AKAP6, TRPC5, YAP1, NIPBL, PAFAH1B1, BBS2, NRG1, ATP8A2, DISC1, FGF9, SLC23A2, PLS1, BBS4, PRKN, TBX20, ITSN2, NTN1, INSR, CSF1, GHRH, YBX3, MEF2C, CYFIP1, SEMA4D, NRP1, ERBB4, SLC6A3, EFNA5</i>                                                                                                                                                                                                                                                                                                                                                                                                                                                                                                                                                                                                                                                                                                                 |
| GO:0050769 | positive regulation of neurogenesis                  | 0.03267<br>5100243<br>81528  | <i>MTOR, PTPRD, TENM4, ROBO2, DSCAM, MACF1, BCL11A, CDH4, SPEN, LRP2, STAU2, SEMA5A, PAK3, TRPC5, PAFAH1B1, SYNJ1, TIAM1, IL34, ASPM, PLXNA2, OPRM1, DISC1, BMP2, RELN, NIN, GLI3, PRKCH, LYN, NTN1, IL33, ACTR2, MAP6, UFL1, FBXW8, EPHA4, NTRK2, IL1RAPL1, NUMB, FBXO31, CYFIP1, SEMA4D, HDAC2, GRM5, NRP1, FAIM, CHODL, CUX1, EPHB2, KALRN, TIAM2, SLIT2, ROBO1, EFNA5</i>                                                                                                                                                                                                                                                                                                                                                                                                                                                                                                                                                                                                                                  |
| GO:0032412 | regulation of ion transmembrane transporter activity | 0.03344<br>3073762<br>28895  | <i>PDE4D, CACNG2, NEDD4, CHRM3, FGF12, THADA, NEDD4L, APP, CACNB2, KCNE4, AKAP6, HECW1, LRRC38, AKAP9, RASGRF2, DAPK1, ANK2, RYR2, GSG1L, RASGRF1, PRKCE, SLMAP, WNK2, ABCC9, ALG10B, OPRM1, STAC, CNIH3, ANK3, NETO2, RELN, CNKSR3, CFTR, SELENO, JPH1, SHISA9, CRACR2A, UTRN, KCNC1, HCN1, NRXN1, ABCC8, MEF2C, SHISA6, NOS1AP, HECW2, GRM5, ATPSCKMT, EPHB2, CACNG3, VMP1, TRDN, NLGN1, NOS1, CACNA2D1, HTT, CCR2, KCNAB1</i>                                                                                                                                                                                                                                                                                                                                                                                                                                                                                                                                                                               |
| GO:0050919 | negative chemotaxis                                  | 0.03426<br>3154843<br>67749  | <i>ROBO2, EPHA7, SEMA5A, NRG3, SEMA3C, SEMA6D, NRG1, SEMA3E, SEMA3A, SEMA3D, NTN1, SEMA4D, FLRT2, SLIT2, ROBO1, EFNA5, SLIT3, SEMA4B</i>                                                                                                                                                                                                                                                                                                                                                                                                                                                                                                                                                                                                                                                                                                                                                                                                                                                                       |
| GO:0008038 | neuron recognition                                   | 0.03426<br>3154843<br>67749  | <i>CNTN4, ROBO2, CNTNAP2, DSCAM, CNTN6, APP, SEMA5A, CRTAC1, EXT1, NCAM2, TNN, NTM, GAP43, EPHA4, NRP1, EPHB2, ROBO1, OPCML</i>                                                                                                                                                                                                                                                                                                                                                                                                                                                                                                                                                                                                                                                                                                                                                                                                                                                                                |
| GO:00      | homophilic                                           | 0.03549                      | <i>CNTN4, CDH8, ROBO2, TENM3, PCDH7, DSCAM, CDH4, CNTN6, FAT3,</i>                                                                                                                                                                                                                                                                                                                                                                                                                                                                                                                                                                                                                                                                                                                                                                                                                                                                                                                                             |

|            |                                                           |                              |                                                                                                                                                                                                                                                                                                                                                                                                                                                                                                                                                                                                                                                                                                                                                                                                                                                                                                                                                                                                                                                                                                                                                                                                                                                                                                       |
|------------|-----------------------------------------------------------|------------------------------|-------------------------------------------------------------------------------------------------------------------------------------------------------------------------------------------------------------------------------------------------------------------------------------------------------------------------------------------------------------------------------------------------------------------------------------------------------------------------------------------------------------------------------------------------------------------------------------------------------------------------------------------------------------------------------------------------------------------------------------------------------------------------------------------------------------------------------------------------------------------------------------------------------------------------------------------------------------------------------------------------------------------------------------------------------------------------------------------------------------------------------------------------------------------------------------------------------------------------------------------------------------------------------------------------------|
| 07156      | cell adhesion via plasma membrane adhesion molecules      | 2840766<br>518687            | <i>CDH7,PCDH11Y,CDH11,PTPRT,CDH18,CDHR3,PCDH9,CDH20,PCDH15,CDH23,IGSF11,CDH26,FAT1,CLSTN2,CADM1,CELSR2,PCDH11X,NECTIN4,HMCN1,NECTIN1,DSG1,CDH5,PCDH8,FAT4,CDH9,CDH2,SDK1,CDH12,CDH17,CDH13,IGSF21,KIRREL3,ROBO1</i>                                                                                                                                                                                                                                                                                                                                                                                                                                                                                                                                                                                                                                                                                                                                                                                                                                                                                                                                                                                                                                                                                   |
| GO:0098815 | modulation of excitatory postsynaptic potential           | 0.03726<br>8438667<br>42529  | <i>CHRNA7,RIMS1,RIMS2,SLC8A3,APP,PRKCZ,TMEM108,RELN,MTMR2,GRIN2A,IGSF11,GRIN2B,CELF4,NRXN1,WNT7A,TMEM25,NLGN1</i>                                                                                                                                                                                                                                                                                                                                                                                                                                                                                                                                                                                                                                                                                                                                                                                                                                                                                                                                                                                                                                                                                                                                                                                     |
| GO:0048738 | cardiac muscle tissue development                         | 0.03933<br>3062399<br>26026  | <i>NOTCH2,MTOR,SGCD,NEBL,ZFPM2,TENM4,ALDH1A2,RARB,SOX6,LRP2,SLC8A1,AKAP6,YAP1,MYLK3,TPM1,PPARA,ALPK2,JARID2,RYR2,CXADR,XIRP2,NRG1,ALPK3,FHL2,SGCZ,MYLK2,PDLIM5,BMP2,PTCD2,FGF9,TBX20,BMP5,CTDP1,SMAD5,MED1,MYO18B,ASB2,MYOCD,MEF2C,ADAMTS9,TNNI1,RUNX1,SORBS2,SGCG,ATG5,NRAP,BMP7,FHOD3,ERBB4,HNRNPU,AKAP13</i>                                                                                                                                                                                                                                                                                                                                                                                                                                                                                                                                                                                                                                                                                                                                                                                                                                                                                                                                                                                       |
| GO:0007626 | locomotory behavior                                       | 0.04124<br>0882736<br>27785  | <i>MTOR,NAV2,ALK,ASTN1,NEGR1,DSCAM,SLC4A10,NCOR1,BTBD9,FGF12,APP,FIG4,KLHL1,ADAM22,PAFAH1B1,GRM1,PAK5,TNR,ELAVL4,OXR1,SLC1A1,NRG1,PRKCE,HTR2C,PUM1,APBA2,KCND2,ANKFN1,CNTN1,STRN,RELN,RCAN1,DAB1,PRKN,PCDH15,CDH23,ALS2,SHANK2,ZFH3,PBX3,OTOG,LMX1A,PARK7,EPHA4,UBE3A,GRM5,KALRN,SLC6A3,EPS8</i>                                                                                                                                                                                                                                                                                                                                                                                                                                                                                                                                                                                                                                                                                                                                                                                                                                                                                                                                                                                                      |
| GO:0045944 | positive regulation of transcription by RNA polymerase II | 0.04208<br>0866251<br>29514  | <i>ZFPM2,PRDM16,ZEB1,RARB,AUTS2,FOXJ2,GLIS3,TCF4,ERG,EGFR,RFX3,CDK12,BACH1,ZNF407,MAML2,BCL11A,FLI1,THRAP3,PRKD1,NCOA7,RUNX2,ONECUT1,LDB2,SMYD3,SSBP3,APBB2,APP,KDM1B,ZNF600,ST18,PYGO1,SSBP2,DUX4,BMPR1B,ZNF717,ARNT,MRTFA,TAF4B,EBF2,YAP1,NFIA,PCGF5,NIPBL,GABPA,CHD6,ATF6,HIVEP1,KLF15,PPARA,MEIS2,NFIB,MRTFB,NR5A2,FOXJ3,TRERF1,AGO2,BCAS3,ZNF606,SMARCA4,ATRX,ABL1,HDAC4,NFAT5,GLIS1,TOX3,FGF10,AP3B1,ZNF438,ZBTB16,FOXK2,MED15,ESRRG,RPS6KA3,GTF2F2,TAF3,RPRD1B,EBF3,ZNF33B,HMGA2,BCL11B,CREM,BMP2,GFI1B,ASXL3,HMGB1,NFATC2,ZNF462,ETS2,ATF1,SMARCA2,ETS1,GLI3,SMARCC1,VENTX,PRDM10,ATF2,PSIP1,CAMTA1,GTF2I,RORB,MED27,ZNF208,PRKN,TBX20,DPF3,NLRC5,TFDP1,PLAGL1,SOX30,NPAS2,ZNF780B,OVOL2,ZFH3,SUPT16H,HOXC13,CASZ1,PBX3,ZNF292,ASH1L,HOXC4,RXRG,SP3,MBTPS2,BMP5,INO80,SMAD5,TCERG1,SLC40A1,MED1,IL33,ZNF521,LMX1A,IL10,ACTR2,SFPQ,PTH,ETV6,ZBTB7C,TEAD1,SREBF2,LMX1B,TWIST1,JAK2,ZBTB38,CREBBP,TNKS,NFKBIA,ALX4,RTRAF,BRD4,ITGA6,ZBTB49,STOX2,AGO1,MEOX2,ELL2,STAT1,PARK7,POU1F1,MTF2,MYOCD,ARID3B,MEF2C,RXRA,WNT7A,ZNF112,WWOX,NCK1,MLLT10,MECOM,ASCL3,UBE3A,RUNX1,ZNF845,CHCHD2,TNFSF11,HDAC2,TET1,ARNT2,ITGA8,RPS6KA5,PID1,ZNF615,KLF12,NRIP1,ZNF850,PRDM15,MITF,MET,CDH13,MLIP,MYB,BMP7,BPTF,KMT2C,RFX2,EYA1,CNOT7,PBX1,NOS1,TCF12,ESR1,ZNF721,NRF1,RORA,DMRT1,NCOA6,HNRNPU,GLI2,THRB</i> |
| GO:0038127 | ERBB signaling pathway                                    | 0.04259<br>1159985<br>86117  | <i>BCAR3,ERBIN,PTPRJ,EGFR,PTPRR,MAPK1,NRG3,EFEMP1,ABL1,PTPN12,NRG1,EGF,PTPN2,PLCE1,TGFA,HIP1,FAM83B,SNX6,GAREM1,NEU3,SLC30A10,CUL5,IQGAP1,CAMLG,MVB12B,PTK2,CCDC88A,ZFYVE28,ITGA1,KIF16B,CDH13,ERBB4,FER</i>                                                                                                                                                                                                                                                                                                                                                                                                                                                                                                                                                                                                                                                                                                                                                                                                                                                                                                                                                                                                                                                                                          |
| GO:0007613 | memory                                                    | 0.04259<br>1159985<br>86117  | <i>PLCB1,CHRNA7,PJA2,BTBD9,GRIA1,SLC8A3,NTF3,TAF2,KCNK10,PRKCZ,BRINP1,SORCS3,PAK5,SCN2A,SLC1A1,CAMK4,RASGRF1,MUSK,HTR2A,RELN,RCAN1,GRIN2A,ATXN1,INSR,LMX1A,ABCC8,SLC6A1,CSMD1,S100B,FOXO6,ITGA8,KALRN,HRH1</i>                                                                                                                                                                                                                                                                                                                                                                                                                                                                                                                                                                                                                                                                                                                                                                                                                                                                                                                                                                                                                                                                                        |
| GO:0007160 | cell-matrix adhesion                                      | 0.04366<br>0876976<br>674916 | <i>FREM1,DLCL1,PTPRA,BCL2,RIN2,PTPRJ,MACF1,ONECUT1,CCL28,VCL,ACER2,MAP4K4,PRKCZ,DUSP22,ITGBL1,CORO2B,LIMCH1,FMN1,ITGB8,NF2,TIAM1,PTPRK,BCAS3,ABL1,PEAK1,CD44,COL5A3,ARHGEF7,CD96,SEMA3E,DISC1,WDPF,ITGA9,FBLN5,ROCK1,VCAM1,UTRN,CSF1,TNN,AJAP1,ITGA6,ITGA4,ADAMTS9,TRPM7,PTK2,PPM1F,ITGA8,NRP1,ITGA1,BCR,PPF1A2,CDH13,EFNA5,ROCK2</i>                                                                                                                                                                                                                                                                                                                                                                                                                                                                                                                                                                                                                                                                                                                                                                                                                                                                                                                                                                 |



|            |                              |                       |                                                                                                                                                                                                                                                                                                                                                                                                                                                                                                                                                                                                                                                                                                                                                                                                                                                                                                                                                                                                                                                                                                                                                                                                                                                                                                                                                        |
|------------|------------------------------|-----------------------|--------------------------------------------------------------------------------------------------------------------------------------------------------------------------------------------------------------------------------------------------------------------------------------------------------------------------------------------------------------------------------------------------------------------------------------------------------------------------------------------------------------------------------------------------------------------------------------------------------------------------------------------------------------------------------------------------------------------------------------------------------------------------------------------------------------------------------------------------------------------------------------------------------------------------------------------------------------------------------------------------------------------------------------------------------------------------------------------------------------------------------------------------------------------------------------------------------------------------------------------------------------------------------------------------------------------------------------------------------|
| GO:0001568 | blood vessel development     | 0.04413319775210206   | NOTCH2, SGCD, TAF5, ZFPM2, ALDH1A2, CHRNA7, ROBO2, SPRED1, ENPEP, MYO1E, MINAR1, FOXJ2, RIN2, CRKL, SETD2, ARHGAP24, ANGPT1, C5, FLT1, ADAMTS6, SLC39A12, PRKD1, RAPGEF2, LRP2, ADGRB3, LUZP1, COL4A2, HDAC9, SEMA5A, THSD7A, CALD1, YAP1, MAPK1, PLG, PDGFD, ITGB8, SEMA3C, AGO2, BCAS3, COL22A1, ABL1, SLC1A1, RAP1A, FGF10, EGF, SEMA3E, ANKRD17, EPN2, ADAM12, EMILIN2, HMG2, TGFA, TJP1, FGF9, ETS1, GLI3, SMOC2, ATF2, COL5A1, GTF2I, TBX20, IL6R, PTPRB, VAV3, ROCK1, OVOL2, HECTD1, CARD10, JCAD, ASB4, CNMD, VSTM4, TNN, MED1, IL10, AIMP1, NRXN1, HIPK1, TWIST1, AKT3, PRKCB, ABCC8, AGO1, MEOX2, STAT1, MYO18B, CCB1, MYOCD, MEF2C, ADGRB1, WNT7A, PDE2A, FBXW8, FLVCR1, NTRK2, ADAMTS9, HS6ST1, PTK2, CDH5, AP2B1, RUNX1, PDCL3, COL18A1, APELA, CDH2, EPHB1, NRP1, PRKCA, NRXN3, BMPER, EPHB2, CDH13, LAMA1, SERPINB7, BMP7, ADGRF5, EYA1, SLIT2, ROBO1, ANTXR1, LOXL2, PIK3R3, CCR2, STARD13, ROCK2, PRDM1, RORA, HSPG2, COL4A3                                                                                                                                                                                                                                                                                                                                                                                                          |
| GO:0040008 | regulation of growth         | 0.04560354468821034   | MTOR, SPOCK1, WWC1, LRP12, ULK2, FTO, PLCB1, ZFPM2, BCL2, RIMS1, MINAR1, RIMS2, PAPP2, DSCAM, CRKL, PTPRJ, EGFR, MACF1, BCL11A, CDH4, EPHA7, RPTOR, GHR, EPB41L3, NEDD4L, ADAM10, APP, SEMA5A, SYT1, AKAP6, RFTN1, DIP2B, TRPC5, YAP1, NRG3, NIPBL, PAFAH1B1, DCAF1, PPARA, PAK5, SEMA3C, JARID2, BBS2, SEMA6D, SMARCA4, MAPKAP1, TNFR, CXADR, MBD5, ABL1, CREG1, LAT S2, NRG1, MUSK, RPS6KA3, ATP8A2, SEMA3E, CDKN2C, AFG3L2, HMG2, PLCE1, CRIM1, DISC1, SEMA3A, SEMA3D, FGF9, SLC23A2, PLS1, DRAXIN, SMARCA2, MAP2, BBS4, DCC, PRKN, TBX20, FBLN5, ITSN2, NTN1, INSR, COLQ, ENPP1, IGSF11, CSNK2A1, CSF1, GHRH, BCL2L1, CTDP1, INO80, PRAME, ATRN, LMX1A, TEAD1, YBX3, NET1, PRSS2, NEDD9, GAP43, HEPACAM, BRMS1L, MTPN, MYOCD, MEF2C, SDCBP, FLVCR1, EXTL3, CYFIP1, SEMA4D, RUNX1, PPM1F, NRP1, REG, CD38, PRDM11, GNAS, SLIT2, ERBB4, PRKCQ, SLC6A3, EFNA5, ARHGEF11, SLIT3, SEMA4B, FSTL4, STK3                                                                                                                                                                                                                                                                                                                                                                                                                                                   |
| GO:0044057 | regulation of system process | 0.048913705743196936  | FTO, TENM4, ZDHHC21, PDE4D, KCNMA1, CHRNA7, RIMS1, RIMS2, DLGAP1, TSHZ3, CTNNA3, ATP2B2, SLC8A3, CHRM3, FGF12, TMEM38B, TAF4, CELF2, PPP1R12B, APP, CACNA1C, CACNB2, SLC8A1, FIG4, ABCG8, KCNE4, AKAP6, RAB8B, RNLS, PRKCZ, HRH2, CORO2B, TPM1, CORIN, AKAP9, PPARA, GRM1, TMEM108, JARID2, ANK2, RYR2, PARD3, TNFR, CXADR, DOCK4, ABL1, HDAC4, SLC1A1, FGF10, PTPRO, ABCC9, HTR2C, OPRM1, HTR2A, MYLK2, DOCK5, ECE1, PLCE1, FBXO32, SCN11A, RELN, ARHGAP42, UNC13B, SELENON, TMTR2, DLGAP2, GRIN2A, SHISA9, SCN10A, KCND3, ROCK1, NMU, PBX3, IGSF11, CTDP1, HCN1, PRKG1, GRIN2B, CELF4, IL33, IL10, NRXN1, JAK2, ABCC8, ATP2B1, MTPN, MYOCD, WNT7A, WASF3, TNNI1, SHISA6, JAM2, NOS1AP, APELA, ASB3, PRKCA, ATPSCMT, CD38, MLIP, TMEM25, TRDN, NLGN1, NOS1, ASIC2, CACNA2D1, HRH1, ROCK2, THRB                                                                                                                                                                                                                                                                                                                                                                                                                                                                                                                                                        |
| GO:0042995 | cell projection              | 5.051871066663704e-42 | NOTCH2, BRINP3, MTOR, UNC80, CNTN4, SPOCK1, NSG1, WWC1, ANKS1B, MYO9A, UNC13C, KSR1, SVIL, TLN2, MICAL3, TENM4, DLC1, RIFOR2, RDX, RP1, STXBP1, ERC1, MYO5A, ODAD2, GPHN, CDH8, CHRNA7, ROBO2, RIMS1, PIK3C3, TENM3, GABRB3, SDCCAG8, FGD4, SPAG16, MYO1E, PLPPR1, USH2A, RIMS2, AUTS2, CARMIL1, SV2C, FANK1, PARVB, CACNG2, NEGR1, CNTNAP2, MAP4, MYO3B, APC, TSHZ3, DSCAM, RTN1, ARHGAP24, SLC4A10, PTPRJ, EFCAB2, NEK4, DOCK10, EGFR, DENND1A, ANGPT1, MACF1, CTNNA3, PRKACB, NEDD4, CRB1, GRIK3, ATP2B2, NTRK3, CNTN3, GABRB1, DGKI, INVS, GRIA1, NEO1, CNTN6, SLC8A3, CEP128, TPTE2, PAK1, EPHA7, CHRM3, RAPGEF2, LRP2, GABRA6, CPEB4, LRGUK, GRM7, SEPTIN9, RPTOR, DNAH6, EPB41L3, KIF4A, TRPM1, ADAM10, APBB2, APP, SAMSN1, CACNA1C, DCLK1, STAU2, GABRG2, DOCK8, TMC1, SYT1, ARHGAP44, NTF3, CD2AP, AURKA, TTC29, SLC8A1, LOXHD1, KANK1, FMN2, THSD7A, HOMER2, CTNNA2, TTL7, DIP2B, TRPC5, ERC2, DNM3, CUBN, IFT57, PRKCZ, KLHL1, DIP2A, ARHGAP32, RAB27B, COBL, DUSP22, SV2B, BRINP1, MAPK1, CADM2, HRH2, RABGAP1L, DNAH14, ADAM22, ALCAM, ABLIM1, CCDC172, NCAM1, GFRA1, FAT3, PTPN13, HRH4, PAFAH1B1, STON2, TPM1, NF2, CNKSR2, CTNNA1, PPP1R9A, AKAP9, NIFB, SYNJ1, GRM1, GABRG1, ENAH, PCDH11Y, SLC24A4, TMEM108, AGO2, MAGI1, DNAH11, SCN2A, RAB22A, EVC2, ANK2, TANC1, ADGRV1, SYNE2, BBS2, SLC9C1, AIF1L, ANKS6, USP8, LDB3, PARD3, DS |

|                |                                                     |                               |                                                                                                                                                                                                                                                                                                                                                                                                                                                                                                                                                                                                                                                                                                                                                                                                                                                                                                                                                                                                                                                                                                                                                                                                                                                                                                                                                                                                                                                                                                                                                                                                                                                                                                                                                                                                                                                                                                                                                                                                                                                                                                                                                                                                                                                                                                                                                                                                                                                                                                                                                                                                                                                                                                                            |
|----------------|-----------------------------------------------------|-------------------------------|----------------------------------------------------------------------------------------------------------------------------------------------------------------------------------------------------------------------------------------------------------------------------------------------------------------------------------------------------------------------------------------------------------------------------------------------------------------------------------------------------------------------------------------------------------------------------------------------------------------------------------------------------------------------------------------------------------------------------------------------------------------------------------------------------------------------------------------------------------------------------------------------------------------------------------------------------------------------------------------------------------------------------------------------------------------------------------------------------------------------------------------------------------------------------------------------------------------------------------------------------------------------------------------------------------------------------------------------------------------------------------------------------------------------------------------------------------------------------------------------------------------------------------------------------------------------------------------------------------------------------------------------------------------------------------------------------------------------------------------------------------------------------------------------------------------------------------------------------------------------------------------------------------------------------------------------------------------------------------------------------------------------------------------------------------------------------------------------------------------------------------------------------------------------------------------------------------------------------------------------------------------------------------------------------------------------------------------------------------------------------------------------------------------------------------------------------------------------------------------------------------------------------------------------------------------------------------------------------------------------------------------------------------------------------------------------------------------------------|
|                |                                                     |                               | <p>T, CXADR, DOCK4, ELAVL4, ABL1, PTPN12, SLC1A1, PRKAA1, KCNH1, TTLL5, APBB1IP, DNAH5, RAP1A, MYO10, INPP5A, FBXL13, GRID2, NRG1, CLIP1, AP3B1, RASGRF1, CEP83, CD44, RGS12, PTPRO, P2RX6, TRIO, CTNND2, NHS, IFT43, ATP8A2, HTR2C, RIC3, SLC2A3, ARHGEF7, AMBRA1, PKHD1L1, OPRM1, HTR2A, BIN2, CYBRD1, MA RK2, TMEM67, ABHD17C, CNIH3, EPHA6, APBA2, SH3KBP1, ATL1, S LC2A13, KCND2, EVC, GRK3, KNDC1, MOSMO, CFAP61, ANK3, SNTG1, BCL11B, MBP, AK8, PLCE1, PCDH9, ATP6V1E1, TJP1, NPHP4, EGF LAM, PACSIN2, CNTN1, CACNA1I, PDLIM5, DISC1, DNER, WDPCP, S EMA3A, ADCY10, STRN, TRAK1, CDC42BPB, SCN11A, ZC3H14, NCAM 2, MYRIP, RIN3, DNAL1, RNF38, RELN, GNAQ, RTTN, UNC13B, TTC2 1B, RAP1GAP, PLS1, SRGAP2, SLC39A6, NIN, DNAH8, GLI3, GABRR 2, KIF21A, PSD3, MAP2, DAW1, PEX6, FARP1, CYLD, BBS4, MAPK8I P1, GABBR2, KPNA1, PHAF1, KITLG, DCC, CHRM5, MYO3A, PRKN, MT MR2, SH3PXD2A, CDC42BPA, PCDH15, NGEF, GRIN2A, TXNRD2, TRP M6, CDH23, FRMPD4, ALS2, KCNQ3, SHISA9, CATSPERG, PDE6A, TB ATA, SCN10A, SHANK2, MAP7, KCND3, MOK, SYBU, CFAP74, KCNN3, MYO1D, ROCK1, VCAM1, ARHGAP31, TENM2, PLCB4, DPYSL5, INSR, NMU, SIAH2, RPH3A, TANC2, ABCA4, GABRG3, FAM183A, ZDHHC17, SLC22A14, JCAD, IFT81, UTRN, SNX9, NDRG2, KCNC1, GHRH, HCN1, GRIN2B, DHRS3, KIF21B, SYNJ2, TNN, FAM149B1, CABYR, MICAL L2, ROR2, FAT1, ACTR2, SFPQ, CLSTN2, PRKAA2, PACRG, ABHD2, M AP6, VASP, PALMD, IQGAP1, NRXN1, CIBAR1, CADM1, NGDN, ANLN, MADD, PTGS1, UFL1, PRKCB, USH1C, NEDD9, NRBP1, ATP2B1, GAP4 3, ASS1, GRIP1, ADCY9, BBS9, HEPACAM, SLC6A1, GRXCR1, STAT1, SLC6A11, MTPN, ABI1, CBLIF, PARK7, MAPK8, ITGA4, ADCYAP1R 1, CYFIP2, ARL4C, ADGRB1, NDFIP1, WASF3, S100B, PKN2, OR10H 2, NECTIN1, WWOX, FGR, DRC7, ATP6V1B2, SNAP29, EPHA4, GABRA 5, NTRK2, IL1RAPL1, RSPH1, RSPH3, SHISA6, MEGF10, TRPM7, PT K2, MARK4, TPH2, SCGN, DIAPH1, FEZ2, CYFIP1, HOATZ, PCDH8, D NAH10, KIRREL1, AMFR, SAXO1, SLC26A2, ASAP1, NOS1AP, MTTP, TPTE, SORBS2, CCDC88A, SPAG6, SLC5A1, CDC45, FYN, ADGRL2, A RL13B, HYDIN, SCN8A, SH2D3C, NCS1, PABPC1, ROR1, CDH2, CNTN 5, ITGA8, EPHB1, EYS, RP1L1, GRM5, SPTB, NRP1, FCHSD2, IFT46, ITGA1, MCC, BCR, CFAP70, NSG2, B9D1, EPHB2, TOGARAM1, SACS, DLG2, CAMK1G, PPFIA2, CDH13, CACNG3, ATG5, MAGI2, FLRT2, S LC1A2, GNAS, TRIM9, TIAM2, DLG5, GABRA2, KIRREL3, DNAH3, GR M3, DNAH17, TTLL11, EXOC4, FAM126A, KCNIP4, KCTD8, CCDC141, SYNDIG1, ROBO1, SAMD4A, ANTXR1, SORCS2, NLGN1, SYNPR, CTT NBP2, NOS1, SLC6A3, ASIC2, VCAN, RAB27A, DNAH9, MYO9B, IQCJ -</p> <p>SCHIP1, MPDZ, CCDC178, FRMD4B, HTT, CFAP44, CATSPERE, AK2, FER, KATNIP, CCR2, RPGRIP1, PITPNM3, WDFY3, EPS8, ANO2, HRH 1, GRIA4, ATAT1, CATSPER2, RGS8, KIF7, PCSK2, HNRNPU, VTI1A, IGF1R, KCNAB1, GLI2, SEPTIN6</p> |
| GO:01<br>20025 | plasma<br>membrane<br>bounded<br>cell<br>projection | 7.72585<br>3532806<br>657e-39 | <p>NOTCH2, BRINP3, MTOR, UNC80, CNTN4, SPOCK1, NSG1, WWC1, ANK S1B, MYO9A, UNC13C, KSR1, TLN2, TENM4, DLC1, RIPOR2, RDX, RP 1, STXBP1, ERC1, MYO5A, ODAD2, GPHN, CDH8, CHRNA7, ROBO2, PI K3C3, TENM3, GABRB3, SDCCAG8, FGD4, SPAG16, MYO1E, PLPPR1, USH2A, AUTS2, CARMIL1, SV2C, FANK1, PARVB, CACNG2, NEGR1, C NTNAP2, MAP4, MYO3B, APC, TSHZ3, DSCAM, RTN1, SLC4A10, PTPR J, EFCAB2, NEK4, DOCK10, EGFR, DENND1A, ANGPT1, MACF1, CTNN A3, PRKACB, NEDD4, CRB1, GRIK3, ATP2B2, NTRK3, CNTN3, GABRB 1, DGKI, INVS, GRIA1, NEO1, CNTN6, SLC8A3, CEP128, PAK1, EPH A7, CHRM3, RAPGEF2, LRP2, GABRA6, CPEB4, GRM7, SEPTIN9, RPT OR, DNAH6, EPB41L3, KIF4A, TRPM1, ADAM10, APBB2, APP, SAMSN 1, CACNA1C, DCLK1, STAU2, GABRG2, DOCK8, TMC1, SYT1, ARHGAP 44, NTF3, CD2AP, AURKA, TTC29, SLC8A1, LOXHD1, KANK1, FMN2, HOMER2, CTNNA2, TTLL7, DIP2B, TRPC5, ERC2, DNM3, CUBN, IFT5 7, PRKCZ, KLHL1, DIP2A, ARHGAP32, RAB27B, COBL, DUSP22, SV2 B, BRINP1, MAPK1, CADM2, HRH2, RABGAP1L, DNAH14, ADAM22, AL CAM, ABLIM1, CCDC172, NCAM1, GFRA1, FAT3, PTPN13, HRH4, PAF AH1B1, STON2, TPM1, NF2, CNKSR2, CTNNA1, PPP1R9A, AKAP9, NF IB, SYNJ1, GRM1, GABRG1, ENAH, PCDH11Y, SLC24A4, TMEM108, A GO2, DNAH11, SCN2A, RAB22A, EVC2, ANK2, TANC1, ADGRV1, SYNE 2, BBS2, SLC9C1, AIF1L, ANKS6, USP8, LDB3, PARD3, DST, CXADR</p>                                                                                                                                                                                                                                                                                                                                                                                                                                                                                                                                                                                                                                                                                                                                                                                                                                                                                                                                                                                                                                                                                                                                                                                                                                                                                                                                                                                                      |

|  |  |  |                                                                                                                                                                                                                                                                                                                                                                                                                                                                                                                                                                                                                                                                                                                                                                                                                                                                                                                                                                                                                                                                                                                                                                                                                                                                                                                                                                                                                                                                                                                                                                                                                                                                                                                                                                                                                                                                                                                                                                                                                                                                                                                                                                       |
|--|--|--|-----------------------------------------------------------------------------------------------------------------------------------------------------------------------------------------------------------------------------------------------------------------------------------------------------------------------------------------------------------------------------------------------------------------------------------------------------------------------------------------------------------------------------------------------------------------------------------------------------------------------------------------------------------------------------------------------------------------------------------------------------------------------------------------------------------------------------------------------------------------------------------------------------------------------------------------------------------------------------------------------------------------------------------------------------------------------------------------------------------------------------------------------------------------------------------------------------------------------------------------------------------------------------------------------------------------------------------------------------------------------------------------------------------------------------------------------------------------------------------------------------------------------------------------------------------------------------------------------------------------------------------------------------------------------------------------------------------------------------------------------------------------------------------------------------------------------------------------------------------------------------------------------------------------------------------------------------------------------------------------------------------------------------------------------------------------------------------------------------------------------------------------------------------------------|
|  |  |  | ,DOCK4,ELAVL4,ABL1,SLC1A1,PRKAA1,KCNH1,TTL5,APBB1IP,DNAH5,RAP1A,MYO10,INPP5A,FBXL13,GRID2,NRG1,CLIP1,AP3B1,RASGRF1,CEP83,CD44,RGS12,PTPRO,P2RX6,CTNND2,NHS,IFT43,HTR2C,RIC3,ARHGEF7,AMBRA1,PKHD1L1,OPRM1,HTR2A,CYBRD1,MARK2,TMEM67,ABHD17C,CNIH3,EPHA6,APBA2,SH3KBP1,ATL1,SLC2A13,KCND2,EVC,KNDC1,MOSMO,CFAP61,ANK3,SNTG1,BCL11B,MBP,AK8,PLCE1,PCDH9,ATP6V1E1,NPHP4,PACSIN2,CNTN1,CACNA1I,DISC1,DNER,WDPCH,SEMA3A,ADCY10,STRN,TRAK1,CDC42BPB,SCN11A,ZC3H14,NCAM2,MYRIP,RIN3,DNAL1,RNF38,RELN,GNAQ,RTTN,UNC13B,TTC21B,RAP1GAP,PLS1,SRGAP2,SLC39A6,NIN,DNAH8,GLI3,GABRR2,KIF21A,PSD3,MAP2,DAW1,PEX6,FARP1,CYLD,BBS4,MAPK8IP1,GABBR2,KPNA1,PHAF1,KITLG,DCC,CHRM5,MYO3A,PRKN,MTMR2,CDC42BPB,PCDH15,NGEF,GRIN2A,TXNRD2,TRPM6,CDH23,FRMPD4,ALS2,KCNQ3,SHISA9,CATSPERG,PDE6A,TBATA,SCN10A,SHANK2,MAP7,KCND3,MOK,SYBU,CFAP74,KCNN3,MYO1D,ROCK1,VCAM1,ARHGAP31,TENM2,PLCB4,DPYSL5,INSR,NMU,SLAH2,RPH3A,TANC2,ABCA4,GABRG3,FAM183A,SLC22A14,JCAD,IFT81,UTRN,SNX9,NDRG2,KCNC1,GHRH,HCN1,GRIN2B,DHRS3,KIF21B,TNN,FAM149B1,CABYR,MICALL2,ROR2,FAT1,ACTR2,SFPQ,CLSTN2,PRKAA2,PACRG,ABHD2,MAP6,VASP,PALMD,IQGA1,NRXN1,CIBAR1,CADM1,NGDN,ANLN,MADD,PTGS1,UFL1,PRKCB,USH1C,NEDD9,NRBP1,ATP2B1,GAP43,ASS1,GRIP1,ADCY9,BBS9,HEPACAM,SLC6A1,GRXCR1,STAT1,SLC6A11,MTPN,ABI1,CBLIF,PARK7,MAPK8,ITGA4,ADCYAP1R1,CYFIP2,ARL4C,ADGRB1,NDFIP1,WASF3,S100B,PKN2,OR10H2,NECTIN1,WWOX,FGR,DRC7,ATP6V1B2,SNAP29,EPHA4,GABRA5,NTRK2,IL1RAPL1,RSFP1,SHISA6,TRPM7,PTK2,MARK4,TPH2,SCGN,DIAPH1,FEZ2,CYFIP1,HOATZ,PCDH8,DNAH10,KIRREL1,AMFR,SAXO1,SLC26A2,ASAP1,NOS1AP,MTP,SORBS2,CCDC88A,SPAG6,SLC5A1,CDC45,FYN,ADGRL2,ARL13B,HYDIN,SCN8A,SH2D3C,NCS1,PABPC1,ROR1,CDH2,CNTN5,ITGA8,EPHB1,EYS,RP1L1,GRM5,NRP1,FCHSD2,IFT46,ITGA1,MCC,BCR,CFAP70,NSG2,B9D1,EPHB2,TOGARAM1,SACS,DLG2,CAMK1G,PPFIA2,CDH13,CACNG3,ATG5,MAGI2,FLRT2,SLC1A2,GNAS,TRIM9,TIAM2,DLG5,GABRA2,KIRREL3,DNAH3,GRM3,DNAH17,TTL5,EXOC4,FAM126A,KCNIP4,CCDC141,SYNDIG1,ROBO1,SAMD4A,ANTXR1,SORCS2,NLGN1,SYNPR,CTTNBP2,NOS1,SLC6A3,ASIC2,VCAN,RAB27A,DNAH9,MYO9B,IQCF-SCHIP1,MPDZ,CCDC178,FRMD4B,HTT,CFAP44,CATSPERE,AK2,FER,CCR2,RPGRI1,WDFY3,EPS8,ANO2,HRH1,GRIA4,ATAT1,CATSPER2,RGS8,KIF7,PCSK2,HNRNPU,VTI1A,IGF1R,KCNAB1,GLI2,SEPTIN6 |
|--|--|--|-----------------------------------------------------------------------------------------------------------------------------------------------------------------------------------------------------------------------------------------------------------------------------------------------------------------------------------------------------------------------------------------------------------------------------------------------------------------------------------------------------------------------------------------------------------------------------------------------------------------------------------------------------------------------------------------------------------------------------------------------------------------------------------------------------------------------------------------------------------------------------------------------------------------------------------------------------------------------------------------------------------------------------------------------------------------------------------------------------------------------------------------------------------------------------------------------------------------------------------------------------------------------------------------------------------------------------------------------------------------------------------------------------------------------------------------------------------------------------------------------------------------------------------------------------------------------------------------------------------------------------------------------------------------------------------------------------------------------------------------------------------------------------------------------------------------------------------------------------------------------------------------------------------------------------------------------------------------------------------------------------------------------------------------------------------------------------------------------------------------------------------------------------------------------|

**Table S3.** The 177 sets of co-expressed rDNA-contacting genes in untreated K562 cells. The search was performed in <https://maayanlab.cloud/Enrichr/enrich#> for ARCHS4 TFs Coexp. The database presents the top-300 genes that are co-expressed with transcription factors. All 1985 genes specify the transcription factors and are co-expressed in different combinations.

| Term                                         | Overlap | Adjusted P-value           | Genes                                                                                                                                                                                                                                                                                                                                                                                                                                                                                                                                                                                                                           |
|----------------------------------------------|---------|----------------------------|---------------------------------------------------------------------------------------------------------------------------------------------------------------------------------------------------------------------------------------------------------------------------------------------------------------------------------------------------------------------------------------------------------------------------------------------------------------------------------------------------------------------------------------------------------------------------------------------------------------------------------|
| ZNF704<br>human tf<br>ARCHS4<br>coexpression | 144/299 | 1.1308931274<br>681654E-28 | ATP8A2;CTNND2;ZBTB20;MSI2;SOGA1;SLC4A4;CELSR2;<br>SLC8A1;MYLK3;HERC2;ZNF608;HERC1;AKT3;KIF21A;<br>DIP2C;SCAPER;MAGI1;GUCY1A2;RBFOX1;TMEM178B;RALGAP1;CACNA2D1;TMOD2;MTUS1;ANK2;FRMD4A;ANK3;<br>TANC2;PYGO1;TANC1;AKAP9;WDFY3;ASTN2;DGKI;ASTN1;MACF1;IGSF3;TNKS;KMT2C;PCDH15;NEDD4L;TMTC2;<br>PIK3R3;AGAP1;ILDR2;CACNA1C;KALRN;NPAS3;FLRT2;MAP2;FUT9;PLXNA2;SRGAP3;MPDZ;BPTF;AUTS2;CADM2;<br>NEBL;MICAL3;ZBTB10;MYO5A;GRIN2B;CORO2B;DCLK1;PBX1;PTPRD;CCDC88A;ARHGAP32;SDK1;DLG2;NBEA;W<br>NK2;SPIRE1;FAT3;TCF4;FAT4;BRWD1;ROBO2;RERE;DOCK3;TENM4;MAST2;GRIK3;ZCHC14;ROBO1;AKAP11;TRIM2;MCF2L;PSD3;TMEM108;HYDIN2;DLGAP1;NP1PA1;N |

|                                              |         |                           |                                                                                                                                                                                                                                                                                                                                                                                                                                                                                                                                                                                                                                                                                                                                                                                                                                                                                                                                                                                                                                                                                     |
|----------------------------------------------|---------|---------------------------|-------------------------------------------------------------------------------------------------------------------------------------------------------------------------------------------------------------------------------------------------------------------------------------------------------------------------------------------------------------------------------------------------------------------------------------------------------------------------------------------------------------------------------------------------------------------------------------------------------------------------------------------------------------------------------------------------------------------------------------------------------------------------------------------------------------------------------------------------------------------------------------------------------------------------------------------------------------------------------------------------------------------------------------------------------------------------------------|
|                                              |         |                           | EO1; ADAMTS9; ARHGEF12; DST; VPS13D; ASH1L; NAV2; SEZ6L; TOX3; MPPED1; SETBP1; LRRC7; MPPED2; ARHGEF7; RAPGEF5; PLCB1; SHANK2; PAFAH1B1; PPM1L; LUZP2; ADAM22; NRXN3; AKAP6; MIPOL1; STOX2; KIAA1328; HECTD2; HECTD4; CLVS2; CTNNA3; ATP9A; MAP4K4; ARNT2; ZNF462; FARP1; MYEF2; NTRK3; PCDH7; LSAMP; YLPM1; KIAA1549L; PDE4DIP; SORBS2; MYO9A; TTLL7; TJP1; PDE10A; APC; ASXL3; TTC3; RGS12                                                                                                                                                                                                                                                                                                                                                                                                                                                                                                                                                                                                                                                                                        |
| PLXNA4<br>human tf<br>ARCHS4<br>coexpression | 142/299 | 9.8831272776<br>65778E-28 | ATP8A2; FRMPD4; MYT1L; ANKRD36; CTNND2; RORB; FRY; S OGA1; SLC8A1; HS6ST3; RIMS1; CDH4; ZNF608; DPYSL5; AKT3; TNR; KIF21A; KIF21B; PKNOX2; ANKS1B; SOX5; PPFI A2; GUCY1A2; ANKRD36C; RBFOX1; MEF2C; EPHA6; KCNH5; TMEM178B; CACNA2D1; PRKCE; TMOD2; ANK2; FRMD4A; ANK3; TANC2; MAPK8IP1; SCN8A; AKAP9; HECW1; WDFY3; DGKI; ASTN1; MACF1; CTTNBP2; STXBP1; AGAP1; ILDR2; KALRN; CACNA1E; NKAIN2; CTIF; DPP6; FLRT2; MAP2; FUT9; ZNF704; PLXNA2; ST8SIA5; HIVEP2; SRGAP3; NDFIP1; ARPP21; SYT1; CADM2; MYO5A; CORO2B; DCLK1; PBX1; SNAP91; PTPRD; CCDC88A; LRFN2; DLG2; DAB1; NBEA; SYNJ1; GNAQ; CNTN1; SPIRE1; FAT3; CCSER1; TCF4; FAT4; SCN2A; SLC44A5; ROBO2; DOCK3; TENM4; CELF2; PTPRO; AFF3; ROBO1; C4ORF50; GRM5; AKAP11; GRM7; TRIM2; NCS1; PSD3; DLGA P1; ZNF385D; NEO1; TRPC5; FAM219A; SORCS3; AJAP1; CN KSR2; MPPED1; NAV3; SETBP1; LRRC7; ARHGEF7; PLCB1; P AFAH1B1; PPM1L; PLPPR5; ADAM22; NRXN3; PRSS51; MAPK8; HECTD4; CLVS2; NCAM1; CTNNA2; CSMD2; PAK3; CSMD1; ATP9A; OPCML; ARNT2; NTRK3; LSAMP; SYT16; KIAA1549L; MEIS2; TTLL7; APC; PPP2R2B; ASXL3; TTC3; RIMBP2 |
| ZNF483<br>human tf<br>ARCHS4<br>coexpression | 139/299 | 4.3465284333<br>86478E-26 | ATP8A1; FRMPD4; MYT1L; DGKB; ZBTB20; RORB; LCLAT1; S LC8A1; RIMS2; RIMS1; AKT3; SAMD12; PRKACB; ANKS1B; K CNH1; UNC13C; GUCY1A2; EPHA6; KCNH5; RALGAP1; TMOD2; MAGI2; TTC7B; ANK2; ANK3; SHISA9; GABRG1; EML6; AD GRB3; SCN8A; HECW1; SCG5; WDPCP; WDFY3; SCG3; ASTN2; DGKI; FTO; NECAB1; SLC1A2; KALRN; NALCN; GLB1L3; MTM R7; GRIN2A; DPP6; PDZD2; MAP2; SNTG1; FUT9; AP4S1; SC AI; DTNA; ZNF382; SYT1; CADM2; SLC4A10; MYO5A; GRIN2 B; LRP1B; PTPRD; FAM135B; DLG2; NBEA; TMEM116; CNTN1; CPE; FAT3; SCN2A; CDS2; GABRB3; SPAG16; CCDC122; ZN F891; DOCK3; RASGRF2; DIRAS2; EFCAB6; PPP1R9A; RYR3; SYNE1; C4ORF50; UNC80; GRM5; AKAP11; LRRTM4; CA5A; TRIM2; ADAMTSL3; PSD3; HYDIN2; DLGAP1; DLGAP2; SLC2 A13; OPRM1; KIF6; AJAP1; CNKSR2; DNM3; LRRC7; KCNMA1; RAPGEF5; PLCB1; SLC24A2; PPM1L; RGPD6; ADAM22; TUL P4; RGPD5; AKAP6; MIPOL1; FBXL20; RANBP3L; KIAA1328; SV2B; CHN1; CLVS2; PAK3; CSMD1; ATP9B; GPR158; ATP9 A; OPCML; RIC3; PCDH9; NEGR1; NTRK3; CADPS; SYT16; KI AA1549L; TTLL7; MAPK10; APC; PPP2R2B; PTPN4; ASB3; Z NF850; TNRC6B; HCN1                       |
| SOX5<br>human tf<br>ARCHS4<br>coexpression   | 138/299 | 1.2817176549<br>19808E-25 | ATP8A2; MYT1L; ANKRD36; ZNF292; CTNND2; UBE3A; RORB; SLC8A1; CDH7; SRGAP2C; GRIPI1; AKT3; KIF21A; DIP2C; SRGAP2B; POTE; SYBU; PKNOX2; PPFI A2; MAGI1; EPHA4; GUCY1A2; MEF2C; EPHA6; CXADR; KCNH5; TMEM178B; RALG APA1; CACNA2D1; TMOD2; MAGI2; RFX3; KAZN; ANK2; FRMD4A; ANK3; TANC2; TIAM2; ADGRB3; RUFY2; AKAP9; HECW1; KCNQ3; DGKI; GRIA1; CTTNBP2; NEDD4L; ILDR2; NREP; KA LRN; CACNA1E; FLRT2; MAP2; FUT9; ZNF704; SRGAP3; MPD Z; BPTF; BCL11B; ZNF382; BCL11A; SIAH3; SLC4A10; MYO5A; CORO2B; DCLK1; ST18; PBX1; LRP1B; PTPRD; CCDC88A; FER; DLG2; DAB1; NBEA; SPIRE1; FAT3; TCF4; FAT4; CNT N4; FGF12; LRP12; SLC44A5; ROBO2; CNTNAP2; DOCK3; TE NM4; CELF2; PTPRO; GRIK3; ELAVL4; GRIK2; FMN2; ROBO1; SLC22A14; NHSL1; ADAMTS3; GRM7; LRRTM4; TRIM2; TME M108; PHACTR3; ITGB8; DLGAP1; ZNF385D; ERC1; NEO1; T TC37; LRRC49; ATRX; MPPED1; NAV3; SETBP1; LRRC7; MPP ED2; SLC24A2; PPM1L; TULP4; NOL4; FGD4; MAPK8; HECTD2; NCAM1; PAK3; CSMD1; MYEF2; NTRK3; LSAMP; SYT16; KI                                                                                                |

|                                              |         |                            |                                                                                                                                                                                                                                                                                                                                                                                                                                                                                                                                                                                                                                                                                                                                                                                                               |
|----------------------------------------------|---------|----------------------------|---------------------------------------------------------------------------------------------------------------------------------------------------------------------------------------------------------------------------------------------------------------------------------------------------------------------------------------------------------------------------------------------------------------------------------------------------------------------------------------------------------------------------------------------------------------------------------------------------------------------------------------------------------------------------------------------------------------------------------------------------------------------------------------------------------------|
|                                              |         |                            | AA1549L;MEIS2;PDE10A;NFIA;APC;NFIB;PPP2R2B;TTC3;SSBP2                                                                                                                                                                                                                                                                                                                                                                                                                                                                                                                                                                                                                                                                                                                                                         |
| SETBP1<br>human tf<br>ARCHS4<br>coexpression | 125/299 | 1.5776077320<br>992477E-18 | CPNE4;MYT1L;ANKRD36;ZNF292;CTNND2;ZBTB20;SOGA1;GRIP1;ZNF608;DACH1;CDH2;DPYSL5;AKT3;KIF21A;SOX6;SRGAP2B;SOX5;PPFIA2;MAGI1;ANKRD36C;WSB1;KCNK10;TMEM178B;CACNA2D1;MAGI2;RFX3;ANK2;FRMD4A;MYT1;PYGO1;IFT81;ADGRB3;DOK5;RUFY2;AKAP9;ASTN2;TOX;ASTN1;KMT2E;GRIA1;TNKS;PDE1A;NEDD4L;ILDR2;BAZ2B;NREP;KALRN;NPAS3;NKAIN3;SNTG1;FUT9;ZNF704;PLXNA2;SRGAP3;LRRC4C;MPDZ;AUTS2;ST8SIA1;CORO2B;DCLK1;PBX1;PTPRD;CCDC88A;LRFN5;DLG2;NBEA;RNF182;ZNF536;FAT3;TCF4;FAT4;SLC44A5;ROBO2;DRAXIN;TENM4;ELAVL4;BICD1;SYNE2;ROBO1;GRM7;LRRTM4;TRIM2;GDAP1L1;ITGB8;RALGPS1;GARNL3;KLF12;ADGRV1;KCND3;LRRC49;TCF12;ATRX;TOX3;LRRC7;MPPED2;NRXN3;NOL4;MIPOL1;FGD4;STOX2;GNG2;NCAM1;CTNNA2;CSMD2;PAK3;PAK5;ZNF462;FARP1;NTRK2;MBD5;MYEF2;NTRK3;LSAMP;YLPM1;MEIS2;ATAT1;MAPK10;NFIA;APC;FABP7;ASXL3;TTC3;YPEL1;SSBP2;TNRC6B             |
| MYT1L<br>human tf<br>ARCHS4<br>coexpression  | 124/299 | 4.2624300768<br>2826E-18   | ATP8A2;FRMPD4;ANKRD36;CTNND2;ZBTB20;RORB;RIMS2;RPH3A;RIMS1;AKT3;ANKS1B;PPFIA2;RGS7;GUCY1A2;ANKRD36C;RBFOX1;MEF2C;RBFOX3;TMEM178B;TMOD2;MAGI2;ANK2;ANK3;TANC2;ADGRB3;SCN8A;AKAP9;HECW1;KCNQ3;ASTN1;GRIA1;RTN1;CTTNBP2;STXBP1;NTM;SLC1A2;NREP;NYAP2;KALRN;NALCN;CACNA1E;GRIN2A;DPP6;PGBD5;MAP2;FUT9;CAMTA1;SRGAP3;PTPRN2;DTNA;SYT1;CADM2;SLC4A10;MYO5A;GRIN2B;DCLK1;SNAP91;PTPRD;CCDC88A;RALYL;DLG2;NBEA;CNTN1;FAT3;TCF4;C8ORF34;GABRB3;DPP10;DOCK3;PTPRO;DIRAS2;CELFA4;ELAVL4;GRIK2;UNC80;GRM5;GRM7;TRIM2;MCF2L;PSD3;PHACTR3;DLGAP1;DLGAP2;GARNL3;TRPC5;LRRC49;UBE2QL1;SYN2;PGM2L1;AJAP1;CNKSR2;DNM3;MPPED1;LRRC7;PLCB1;SLC24A2;PPM1L;ADAM22;NRXN3;AKAP6;STOX2;SV2B;CHN1;CLVS2;NCAM1;CTNNA2;PAK3;CACNG3;PAK5;ATP9A;OPCML;GABBR2;ARNT2;KCNJ6;NTRK3;SYT16;KIAA1549L;ATP2B2;TTLL7;MAPK10;APC;PPP2R2C;PPP2R2B;TTC3 |
| ASH1L<br>human tf<br>ARCHS4<br>coexpression  | 122/299 | 3.2227551369<br>62082E-17  | PATJ;TRIO;ATP8A1;ANKRD36;RORA;FRY;SOGA1;ZFYVE26;DNM1P47;HERC2;HERC1;AKT3;DIP2B;GUCY1A2;RALGAP1;RALGAP2;TMOD2;ANK2;TANC2;CLIP1;AKAP9;WDPCP;WDFY3;ASTN2;UTRN;ANKRD17;MACF1;DDX6;KMT2C;ITPR2;CACNA1C;KALRN;CACNA1E;LPP;PCNX1;PDZD2;ZNF704;HIVEP1;TRPM7;CEP192;HIVEP2;BPTF;CREBBP;ZNF382;LRBA;DENND4C;MICAL3;MYO5A;LNPEP;ARHGAP26;SMARCA2;PHC3;GRIN2B;ZZEF1;MED13L;ARHGAP32;AGO3;DMXL2;STRN;CDK12;BRWD1;SETD2;DOCK3;PPP1R13B;DOCK9;RASGRF2;LYST;SYNE2;SYNE1;UNC80;AKAP13;NIPBL;C16ORF72;AKAP11;ADAMTSL3;ZNF407;PSD3;ERC1;ARHGEF12;KCND2;DST;VPS13C;ARAP2;VPS13B;ARID1B;NCOR1;PEAK1;BIRC6;RAPGEF5;PLCB1;NFAT5;ROCK2;PRUNE2;MIPOL1;BTAF1;KIAA1328;HECTD1;NSD1;HECTD4;PCNT;ATP9B;RANBP2;ARFGEF1;USP24;SPEN;MBD5;MON2;MGA;ZNF804B;ERBIN;YLPM1;ADAM32;PDE4DIP;DDHD1;MYO9A;GATAD2B;TTLL7;APC;KANSL1;NEDD4;SLMAP;FRYL    |
| MACF1<br>human tf<br>ARCHS4<br>coexpression  | 122/299 | 3.2227551369<br>62082E-17  | ITSN2;TRIO;MAML2;ATP8A1;RORA;FRY;SOGA1;ETS1;DOCK10;ZFYVE26;PTAR1;DNM1P47;HERC2;HERC1;MPRIIP;PIEZO2;SACS;ANKFY1;DIP2B;MAP3K5;MBNL1;RALGAP1;RALGAP2;FNDC3B;TANC2;TANC1;WDFY3;UTRN;NOTCH2;ANKRD17;DDX6;KMT2C;ITPR2;IQGAP1;CACNA1C;LPP;PCNX1;ATXN1;ZNF704;CEP192;HIVEP2;CREBBP;LRBA;DENND4C;EXOC6B;MICAL3;MYO5A;LNPEP;DNAJC13;ARHGAP26;SMARCA2;ZZEF1;MED13L;CYLD;PTPRB;DMXL2;FAT1;BCL2;CCSER2;STRN;FAT4;DOCK4;DOCK9;DOCK8;RASGRF2;PTPRJ;LIMD1;LYST;SYNE2;SYNE1;AKAP13                                                                                                                                                                                                                                                                                                                                             |

|                                              |         |                            |                                                                                                                                                                                                                                                                                                                                                                                                                                                                                                                                                                                                                                                                                                                                                                                                    |
|----------------------------------------------|---------|----------------------------|----------------------------------------------------------------------------------------------------------------------------------------------------------------------------------------------------------------------------------------------------------------------------------------------------------------------------------------------------------------------------------------------------------------------------------------------------------------------------------------------------------------------------------------------------------------------------------------------------------------------------------------------------------------------------------------------------------------------------------------------------------------------------------------------------|
|                                              |         |                            | ;NIPBL;C16ORF72;AKAP11;ZNF407;KIF13A;MYOCD;ARHGEF12;ITGA4;DST;VPS13C;ARAP2;VPS13B;ASH1L;URB1;ARID1B;VCAN;NCOR1;PEAK1;BIRC6;PPP1R12B;DOCK2;DOCK1;KDM7A;NFAT5;WDR26;ROCK2;HERC2P2;HTT;BTAF1;KIAA1328;HECTD1;NSD1;HECTD4;ZNF106;RANBP2;ARFGEF1;USP24;SPEN;MON2;TRAPPC10;MGA;ERBIN;YLP1;ADAM32;DDHD1;MYO9A;MTOR;TJP1;SLMAP;ESYT2;FRYL                                                                                                                                                                                                                                                                                                                                                                                                                                                                  |
| SATB2<br>human tf<br>ARCHS4<br>coexpression  | 121/299 | 8.9067497006<br>51784E-17  | ZFYVE9;FRMPD4;MYT1L;ANKRD36;SLC8A1;EPS8;CDH4;KIF21A;PKNX2;ANKS1B;SOX5;PPFIA2;RGS7;GUCY1A2;ANKRD36C;MEF2C;KCNH5;TMEM178B;CACNA2D1;TMD2;MAGI2;ZNF271P;ANK2;FRMD4A;ANK3;SHISA9;EML1;TANC2;TIAM2;GAREM1;AKAP9;ULK2;TLL11;ASTN2;DGKI;CTTNBP2;TNKS;KALRN;NKAIN2;FLRT2;MAP2;FUT9;ZNF704;PLXNA2;ANKRD20A5P;ST8SIA5;ARPP21;CADM2;MYO5A;GRIN2B;CORO2B;DCLK1;PTPRD;CCDC88A;DLG2;DAB1;NBEA;SYNJ1;SPIRE1;FAT3;CCSER1;CNTN3;TCF4;FAT4;SCN2A;RGL1;BRWD1;SLC44A5;ROBO2;SETD2;DOCK3;TENM4;CELF2;PTPRO;NHSL1;GRM7;PPP2R5E;TRIM2;ZNF648;TMEM108;PHACTR3;HYDIN2;DLGAP1;DLGAP2;NEO1;KDM6A;SLC2A13;ATRX;COBL;FAM126B;ARID1B;ITFG1;DNM3;VCAN;MMP16;MPPED1;NAV3;LRRC7;SHANK2;LUZP2;PLPPR5;RGPD6;ATP10B;MIPOL1;PRSS51;MAPK8;NCAM1;PAK5;ATP9A;NTRK3;KIAA1549L;LHFP3;C1ORF21;MEIS2;TLL7;MAB21L3;APC;CAMK4;ASXL3;PTPN4;CCDC171 |
| SORBS2<br>human tf<br>ARCHS4<br>coexpression | 120/299 | 2.4576243438<br>72832E-16  | FHOD3;MYT1L;SLC8A1;MYLK3;CDH2;DPYSL5;ZSCAN30;AKT3;LONP2;KIF21A;LARGE1;MAGI1;EPHA7;MLIP;ST6GAL2;CACNA2D1;MAGI2;MTUS2;ANK2;FRMD4A;ANK3;UNC5D;TANC2;TIAM2;TOM1L2;AKAP9;KCNQ3;SLC27A6;ALPK3;WDFY3;MXRA7;ALPK2;DGKI;MACF1;BAZ2B;CACNA1C;NREP;KALRN;LPP;MAP2;ZNF704;PLXNA2;SRGAP3;CCDC141;MPDZ;CADM1;SPHKAP;ZNF382;AUTS2;NEBL;ST18;SNAP91;PTPRD;DLG2;WNK2;RCAN2;PDE3A;TCF4;ROBO2;RYR2;MYOM1;TENM4;ELAVL4;FHL2;LDB3;SIPA1L2;PPP1R9A;MYOM2;PTPRG;RASGEF1B;TRIM2;MYO18B;PSD3;PGM5;RALGPS1;UNC45B;MYOCD;DST;DCC;LRRC49;ATRX;ENAH;SETBP1;LRRC7;NOS1AP;SHANK2;PRKAA2;TULP4;AKAP6;STOX2;TBX20;NHS;CTNNA3;NCAM1;CSMD3;PAK3;PDLIM5;CORIN;CLVS1;ZNF462;FARP1;MYEF2;NTRK3;CADPS;SYT16;PDE4DIP;PPP2R3A;KIAA0232;CDC42BPA;MAPK10;PDE10A;NFIA;NFIB;KLHL7;ASXL3;TTC3;YPEL1;TACC2;FRYL;HCN1                              |
| PBX1<br>human tf<br>ARCHS4<br>coexpression   | 117/299 | 5.9169740928<br>28944E-15  | ATP8A2;MYT1L;CTNND2;KLHL32;ZBTB20;ADARB2;SOGA1;RPS6KA5;ZNF608;CDH2;DPYSL5;PEG10;KIF21A;KIF21B;EPHB2;LARGE1;MAGI1;GUCY1A2;KCNK10;TMEM178B;CACNA2D1;MAGI2;EBF3;ANK2;FRMD4A;ANK3;SHISA9;FOXP2;TANC2;PYGO1;WDPCP;WDFY3;ASTN2;DGKI;FTO;IGSF3;CHRNA7;NTM;PIK3R3;AGAP1;CACNA1C;NREP;KALRN;NPAS3;ORC4;PGBD5;MAP2;ZNF704;MAP6;CAMTA1;SRGAP3;ASIC2;ZNF423;MPDZ;CADM1;AUTS2;NETO2;HOOK3;GRIN2B;DCLK1;PTPRD;CCDC88A;NBEA;GNAQ;FAT3;FAT4;GABRB3;ROBO2;DRAXIN;DOCK3;TENM4;PTPRO;CELF4;ELAVL4;TSPAN11;ROBO1;TRIM2;ADAMTSL3;ZNF385D;NEO1;LRRC49;UBE2QL1;GFRA1;NAV2;SORCS3;PGM2L1;NAALADL2;AJAP1;TOX3;GAP43;SETBP1;LRRC7;PPP1R12B;PPM1L;MIPOL1;STOX2;CECR2;GTF2IP1;KIAA1328;CTNNA2;PAK3;CSMD1;PAK5;ATP9A;ZNF462;FARP1;MBD5;KCNJ6;MYEF2;NTRK3;PCDH8;LSAMP;MAPK10;NEDD4;TTC3;ASB4;ADGRL2                              |
| TCF4<br>human tf<br>ARCHS4<br>coexpression   | 116/299 | 1.3471390640<br>769162E-14 | ATF2;MYT1L;ANKRD36;ZNF292;SLC8A1;SRGAP2C;ZNF608;ZSCAN30;AKT3;KIF21A;SCAPER;SRGAP2B;ANKS1B;PPFIA2;MAGI1;ANKRD36C;MEF2C;MAGI2;RFX3;ANK2;SHISA9;TIAM2;ADGRB3;DOK5;RUFY2;AKAP9;KCNQ3;ASTN2;KMT2E;GRIA1;CTTNBP2;NTM;PCDH15;NEDD4L;BAZ2B;NREP;NYAP2;KALRN;NPAS3;NKAIN2;FLRT2;MAP2;SN                                                                                                                                                                                                                                                                                                                                                                                                                                                                                                                     |

|                                               |         |                            |                                                                                                                                                                                                                                                                                                                                                                                                                                                                                                                                                                                                                                                                                                                                                            |
|-----------------------------------------------|---------|----------------------------|------------------------------------------------------------------------------------------------------------------------------------------------------------------------------------------------------------------------------------------------------------------------------------------------------------------------------------------------------------------------------------------------------------------------------------------------------------------------------------------------------------------------------------------------------------------------------------------------------------------------------------------------------------------------------------------------------------------------------------------------------------|
|                                               |         |                            | TG1;FUT9;ZNF704;ST8SIA5;SRGAP3;GRIA4;ZNF382;BCL11A;CORO2B;DCLK1;PTPRD;CCDC88A;FER;DLG2;NBEA;ZNF536;FAT3;CCSER1;SCN2A;ROBO2;TENM4;CHD9;CELF2;PTPRO;ELAVL4;SLC35F1;AFF3;BTCD1;NHSL1;GRM7;LRRTM4;TRIM2;RB1CC1;DLGAP1;TCF12;ATRX;FAM126B;ZDHC17;ARID1B;TOX3;MMP16;MPPED1;NAV3;SETBP1;IL1RAPL2;MPPED2;VSTM2A;CRB1;PLPPR5;NRXN3;MIPOL1;PRSS51;STOX2;HECTD2;CLVS2;NCAM1;PAK5;RFTN2;ZNF462;MBD5;MYEF2;NTRK3;KIAA1549L;DDHD1;TTLL7;NFIA;APC;NFIB;KLHL7;ASXL3;TTC3;PTPN4;SSBP2;ASB3                                                                                                                                                                                                                                                                                  |
| POGZ<br>human tf<br>ARCHS4<br>coexpression    | 116/299 | 1.3471390640<br>769162E-14 | ANKRD36;SOGA1;CELSR2;IGF1R;TIAL1;HERC2;ZNF608;LIP1;AKT3;KIF21A;SRGAP2B;POTEC;MAGI1;ANKRD36C;HFM1;RALGAP1;TTC7B;SHISA9;FOXP2;TANC2;AKAP9;WDPCP;ASTN2;FTO;MACF1;INO80D;TNKS;KMT2C;AGAP1;BAZ2A;BAZ2B;KALRN;ATXN3;MAP2;ZNF704;GSE1;ANKRD10;TRPM7;CEP192;MPDZ;BPTF;CREBBP;ZNF382;AUTS2;RANBP17;MICAL3;PHC3;PTPRD;MLLT10;NBEA;WNK2;AGO1;DLG5;AGO2;TCF4;EIF4G3;GABRB3;RERE;CNTNAP2;CHD9;GADL1;PPP1R9A;AFF3;SYNE2;ZCCHC14;DTWD2;UNC80;EPB41L4A;TRIM2;ADAMTSL3;MCF2L;TLK1;NP1PA1;NEO1;ARFGEF3;RBM6;USP49;NCOA6;VPS13B;ASH1L;NAV2;SEZ6L;ARID1B;SFPQ;NAV3;SETBP1;PEAK1;FAM193A;SHANK2;NFAT5;NRXN1;RGPD6;TULP4;RGPD5;FAM214A;MIPOL1;KIAA1328;HECTD4;SPEN;ZNF462;FARP1;MYEF2;MGA;CADPS;YLPM1;ADAM32;CDC42BPA;GATAD2B;NFIA;KANSL1;NFIB;TTC3;RIMBP2;ASB4;ASB3;TNRC6B      |
| FAM171B<br>human tf<br>ARCHS4<br>coexpression | 116/299 | 1.3471390640<br>769162E-14 | SEMA5A;ERO1B;FRMPD4;DGKB;LCLAT1;TIAL1;PPP1CB;SRGAP2C;SYNPR;KIF21A;ZNF568;SAMD12;PRKACB;SRGAP2B;ANKS1B;PPFIA2;EPAH7;WSB1;CXADR;LIMCH1;SLX4IP;MAGI2;RFX3;ZNF271P;ANK2;GABRG2;ADGRB3;RUFY2;KCNQ3;SCG5;SCG3;RIN2;NECAB1;SAR1A;CTTNBP2;BTF3L4;EFNA5;NALCN;SDCBP;GRIN2A;MAP2;SNTG1;FUT9;CADM1;SYT1;CADM2;INSR;SLC4A10;SNAP91;PTPRD;IGSF11;NBEA;CNTN1;CPE;TCF4;SCN2A;FGF12;CPEB4;GABRB3;SPAG16;ROBO2;DPP10;SLC35F1;PPP1R9A;PTPRG;PCMTD2;TRIM9;GRM5;NHSL1;LRRTM4;TRIM2;RB1CC1;TLK1;ITGB8;DLGAP2;EDIL3;PCMTD1;MAPK1IP1L;SLC2A13;ATRX;SEZ6L;SRP9;PJA2;CNKSR2;SETBP1;LRRC7;MPPED2;PLCB1;SLC24A2;NLGN1;ATL1;NRXN1;PLP1R5;RAP1GDS1;NOL4;CHN1;NCAM2;GPR158;AKAIN1;RFTN2;MYEF2;GABRA5;NTRK3;CADPS;SYT16;CDC42BPA;OXR1;TTLL7;NFIA;APC;NFIB;PPP2R2B;TTC3;ASB4;PTPN4;SSBP2   |
| TRIM23<br>human tf<br>ARCHS4<br>coexpression  | 114/299 | 1.0116600222<br>967192E-13 | ATP8A2;ATP8A1;FRMPD4;MYT1L;DGKB;CTNND2;RPH3A;SYNPR;AKT3;KIF21A;PRKACB;SYBU;ANKS1B;PPFIA2;KCNH1;GUCY1A2;RBFOX1;CACNA2D1;TMOD2;CACNA2D3;ANK2;SCAMP1;GABRG2;GABRG1;ADGRB3;SCN8A;RUFY2;FAR1;KCNQ5;WDFY3;ASTN1;NECAB1;RTN1;STXBP1;SLC1A2;NALCN;GRIN2A;MAP2;FUT9;NDFIP1;DTNA;SYT1;CADM2;SLC4A10;MYO5A;HSPA12A;BTBD10;CORO2B;DCLK1;SNAP91;PTPRD;DLG2;NBEA;SYNJ1;RCAN2;CNTN1;SCN2A;BRWD1;CDK14;FGF12;CPEB4;GABRB3;DPP10;RNF11;DOCK3;DIRAS2;PPP1R9A;SYNE1;TRIM9;GRM5;AKAP11;TRIM2;RB1CC1;PSD3;DLGAP1;EDIL3;KCND2;PDE4D;KCNA1;SYN2;PJA2;CNKSR2;DNM3;RAPGEF2;RAPGEF5;PLCB1;PAFAH1B1;RAPGEF4;SLC24A2;PPM1L;ADAM22;NRXN3;AKAP6;KIAA0513;SV2B;CHN1;CLVS2;SPOCK1;NCAM1;CTNNA2;NCAM2;GPR158;ATP9A;OPCML;ARNT2;CA10;ATRNL1;SYT16;KIAA1549L;ATP2B2;TTLL7;APC;PPP2R2C;PPP2R2B |
| NFAT5<br>human tf<br>ARCHS4                   | 113/299 | 2.2175635187<br>573056E-13 | ITSN2;TRIO;MAML2;RORA;SOGA1;ZFYVE26;HERC2;HERC1;MPRIP;MBNL1;MBNL2;RALGAP1;FNDC3B;TANC2;TANC1;CLIP1;WDPCP;WDFY3;ASTN2;UTRN;FTO;NOTCH2;ANKRD17;MACF1;DDX6;KMT2C;ITPR2;BAZ2A;IQGAP1;NL                                                                                                                                                                                                                                                                                                                                                                                                                                                                                                                                                                        |

|                                                |         |                            |                                                                                                                                                                                                                                                                                                                                                                                                                                                                                                                                                                                                                                                                                                                                                          |
|------------------------------------------------|---------|----------------------------|----------------------------------------------------------------------------------------------------------------------------------------------------------------------------------------------------------------------------------------------------------------------------------------------------------------------------------------------------------------------------------------------------------------------------------------------------------------------------------------------------------------------------------------------------------------------------------------------------------------------------------------------------------------------------------------------------------------------------------------------------------|
| coexpression                                   |         |                            | K;LPP;ATXN3;PCNX1;SEC14L1;ATXN1;HIVEP1;HIVEP2;CREBBP;LRBA;DENND4C;MICAL3;LNPEP;HOOK3;ARHGA P26;SMARCA2;PHC3;ZZEF1;MED13L;AGO3;AGO2;DMXL2;FAT1;STRN;CDK12;DIDO1;DOCK5;SETD2;DOCK9;KIAA 1671;PTPRJ;LIMD1;SYNE2;SYNE1;AKAP13;NIPBL;C16 ORF72;AKAP11;SH3PXD2A;ADAMTSL3;ZNF407;KYN;KI F13A;ARHGEF11;ARHGEF12;DST;VPS13C;VPS13D;ARAP 2;VPS13B;ASH1L;ARID1B;PATL1;NCOR1;PEAK1;BIRC6;KDM7A;WDR26;ROCK2;HTT;RRBP1;MIPOL1;KIAA1328;HECTD1;NSD1;HECTD4;ATP9B;RANBP2;ARFGF1;USP24;SPEN;FARP1;MON2;TRAPPC10;ERBIN;YLPMP1;ADAM32;MYO9A;GATAD2B;TJP1;KANSL1;NEDD4;SLMAP;ESYT2                                                                                                                                                                                           |
| MEIS2<br>human tf<br>ARCHS4<br>coexpression    | 113/299 | 2.2175635187<br>573056E-13 | ERO1B;MYT1L;CTNND2;ZBTB20;SOGA1;SLC8A1;HS6ST3;SCGN;CDH4;ZNF608;DACH1;KIF21A;KIF21B;RGS8;SO X5;MAGI1;KCNH5;TMEM178B;CACNA2D1;TMOD2;MAGI2;MTUS2;ANK2;FRMD4A;ANK3;SHISA9;EML1;MYT1;TANC2;CLIP1;RRAGD;SCG5;WDPCP;SCG3;ASTN2;RIN2;DGKI;FTO;CTTNBP2;BAZ2B;NREP;NYAP2;KALRN;FLRT2;MAP2;FUT9;ZNF704;PLXNA2;STXBP6;SRGAP3;ZFHX3;PTPRN 2;CADM1;ZNF382;AUTS2;NEBL;BTBD9;GRIN2B;LRP1B;PTPRD;RALYL;PLCXD3;NBEA;WNK2;RNF182;SPIRE1;CP E;FAT4;LHX9;GABRB3;ROBO2;DRAXIN;TENM4;ELAVL4;GLI3;ROBO1;UNC80;GRM7;TRIM2;MCF2L;PHACTR3;HYD IN2;TRPC5;ABCC8;NAV3;SETBP1;LRRC7;CNKSR3;MPPE D2;MYO3A;SAMD5;RGPD5;NOL4;MIPOL1;GNG2;NCAM1;C SMD3;PAK3;MBD5;MYEF2;ANKRD30BL;NTRK3;CADPS;LS AMP;SYT16;MAPK10;PDE10A;APC;PPP2R2B;NEDD4;ASX L3;TTC3;ASB3                                  |
| RORB<br>human tf<br>ARCHS4<br>coexpression     | 113/299 | 2.2175635187<br>573056E-13 | ATP8A2;FRMPD4;MYT1L;CTNND2;SLC8A1;RIMS2;RPH3A;RIMS1;PRKACB;ANKS1B;PPFIA2;KCNH1;RGS7;UNC13C;GUCY1A2;RBFOX1;KCNH5;TMOD2;ANK2;ANK3;GABRG2;GABRG1;ADGRB3;SCN8A;HECW1;DGKI;ASTN1;NECAB1;S TXBP1;SLC1A2;KALRN;NALCN;GRIN2A;DPP6;PGBD5;MA P2;FUT9;ST8SIA5;CAMTA1;MBP;SRGAP3;NDFIP1;DTNA;SYT1;CADM2;SLC4A10;MYO5A;HSPA12A;GRIN2B;DCLK 1;SNAP91;PTPRD;DLG2;SYNJ1;CNTN1;SCN2A;GABRB3;PTPRT;DOCK3;KCNC1;DIRAS2;RASGRF1;OTUD7A;UNC80;TRIM9;GRM5;AKAP11;TRIM2;NCS1;PSD3;DLGAP1;DLG AP2;MYRIP;SYN2;AJAP1;CNKSR2;DNM3;MPPED1;LRRC7;RAPGEF5;PLCB1;PAFAH1B1;RAPGEF4;SLC24A2;PPM1L;ADAM22;KIAA0513;SV2B;CHN1;CLVS2;NCAM1;CTNNA2;PDE6A;PAK3;CACNG3;ATP9A;WASF3;OPCML;GABBR2;A RNT2;GABRA5;ATRNL1;NTRK3;CADPS;LSAMP;SYT16;KI AA1549L;ATP2B2;TTLL7;APC;PPP2R2C;PPP2R2B;HCN1   |
| SLC4A10<br>human tf<br>ARCHS4<br>coexpression  | 113/299 | 2.2175635187<br>573056E-13 | ATP8A1;FRMPD4;MYT1L;DGKB;KNDC1;LDLRAD4;SLC8A1;HS6ST3;RPH3A;SYNPR;SAMD12;PRKACB;SYBU;ANKS1B;PPFIA2;KCNH1;RGS7;UNC13C;RBFOX1;PRKCE;TMOD2;ANK2;GABRG2;GABRG1;PCP4;ADGRB3;SCN8A;KCNQ3;SC G3;NGEF;NECAB1;STXBP1;SLC1A2;KALRN;NALCN;GRIN 2A;DPP6;PGBD5;MAP2;PTPRN2;NDFIP1;SYT1;CADM2;M YO5A;HSPA12A;GRIN2B;CORO2B;DCLK1;SNAP91;LRP1B;DLG2;SYNJ1;RCAN2;CNTN1;CPE;SCN2A;FGF12;GABRB 3;DOCK3;RASGRF2;DIRAS2;RASGRF1;GRM1;UNC80;TRI M9;GRM5;AKAP11;TRIM2;NCS1;PSD3;DLGAP1;KCND3;S LC2A13;KCNAB1;MYRIP;SYN2;C1QL3;PJA2;AJAP1;CNK SR2;DNM3;LRRC7;KCNMA1;RAPGEF5;PLCB1;RAPGEF4;S LC24A2;ADAM22;KIAA0513;SV2B;CHN1;CLVS2;CTNNA2;NCAM2;CACNG3;GPR158;ATP9A;OPCML;GABBR2;ARNT2;CA10;GABRA5;ATRNL1;NTRK3;KCNIP4;SYT16;KIAA15 49L;ATP2B2;TTLL7;MAPK10;PPP2R2C;PPP2R2B;HCN1 |
| KIAA1549<br>human tf<br>ARCHS4<br>coexpression | 111/299 | 1.4816734962<br>619541E-12 | ATP8A2;MYT1L;ZNF292;CTNND2;MSI2;SOGA1;CDH4;ZN F608;CDH2;DPYSL5;AKT3;KIF21A;RGS8;ANKS1B;PPFI A2;MAGI1;TMEM178B;CACNA2D1;MAGI2;RFX3;ANK2;FR MD4A;ANK3;SHISA9;MYT1;TANC2;IFT81;AKAP9;HECW1;KCNQ3;IGSF3;CHRNA7;NTM;NEDD4L;PIK3R3;AGAP1;N REP;KALRN;CACNA1E;NPAS3;PHF21B;MAP2;FUT9;ZNF7                                                                                                                                                                                                                                                                                                                                                                                                                                                                       |



|                                              |         |                            |                                                                                                                                                                                                                                                                                                                                                                                                                                                                                                                                                                                                                                                                                                                                   |
|----------------------------------------------|---------|----------------------------|-----------------------------------------------------------------------------------------------------------------------------------------------------------------------------------------------------------------------------------------------------------------------------------------------------------------------------------------------------------------------------------------------------------------------------------------------------------------------------------------------------------------------------------------------------------------------------------------------------------------------------------------------------------------------------------------------------------------------------------|
|                                              |         |                            | 04;PLXNA2;MAP6;CAMTA1;SRGAP3;MPDZ;AUTS2;NETO2;GRIN2B;DCLK1;PBX1;PTPRD;CCDC88A;DLG2;NBEA;DLG5;FAT3;TCF4;SCN2A;GABRB3;PTPRT;ROBO2;DRAXIN;TENM3;TENM4;PTPRO;CELFB4;ELAVL4;GRIK2;ROBO1;GRM7;TRIM2;ADAMTSL3;GDAP1L1;TMEM108;NCOA6;DCC;LRR49;HUNK;UBE2QL1;IL17RD;PGM2L1;GAP43;NAV3;SETBP1;LRRC7;ARHGEF7;AKAP6;STOX2;MAPK8;GNG2;NCAM1;CSMD2;PAK3;PAK5;ARNT2;ZNF462;FARP1;MBD5;MYEF2;NTRK3;LSAMP;KIAA1549L;ATAT1;TNRC6C;APC;ZNF618;ASXL3                                                                                                                                                                                                                                                                                                  |
| NPAS3<br>human tf<br>ARCHS4<br>coexpression  | 111/299 | 1.4816734962<br>619541E-12 | APP;SPON1;CTNND2;ZBTB20;CDH4;DACH1;CDH2;DPYSL5;PEG10;AKT3;KIF21A;SOX6;EPHB1;SRGAP2B;ANKS1B;MAGI1;GUCY1A2;TMEM178B;TMOD2;MAGI2;RFX3;KAZN;ANK2;FRMD4A;PYGO1;IFT81;ADGRB3;TNIK;ASTN1;GRIA1;ADCYAP1R1;NTM;AGAP1;ILDR2;NREP;DPP6;NKAIN3;MAP2;CDH20;FUT9;CAMTA1;KCNN3;SRGAP3;MPDZ;NDFIP1;DTNA;CADM1;WSCD1;AUTS2;CADM2;ST8SIA1;PXDNL;NETO2;CORO2B;DCLK1;PBX1;PTPRD;CCDC88A;SDK1;CNTN1;FAT3;TCF4;SPAG16;DPP10;DRAXIN;TENM3;MEGF10;GRIK4;SLC35F1;FMN2;SIPA1L2;GRM3;TRIM9;GRM5;TRIM2;TMEM108;ITGB8;ADGRV1;KCND3;LRRC49;IL17RD;SEZ6L;PARD3B;TOX3;NRG3;SETBP1;MPPED2;LUZP2;NTN1;STOX2;GNG2;TMEM67;LRIG1;NCAM1;CTNNA2;PAK3;JAM2;ATP9A;ARNT2;ZNF462;NTRK2;MYEF2;NTRK3;KIAA1549L;TTL7;MAPK10;APC;PPP2R2B;FABP7;SMOC1;TTC3                        |
| ZNF236<br>human tf<br>ARCHS4<br>coexpression | 110/299 | 3.5978703460<br>84322E-12  | ZBTB21;RORA;PTAR1;DNM1P47;HERC1;PP1P5K2;RTTN;POTEC;MBNL1;USP7;RALGAP1;CLIP1;AKAP9;WDFY3;ASTN2;UTRN;CFAP61;ANKRD17;MACF1;KMT2C;CLEC16A;BAZ2B;LPP;PCNX1;GRK3;ATXN1;RNF217;ADAMTS17;HIVEP1;CEP192;HIVEP2;BPTF;LRRC37A3;CREBBP;LRBA;DENND4C;LNPEP;DNAJC13;ARHGAP26;SMARCA2;ZZEF1;MED13L;CYLD;ARHGAP32;GON4L;DMXL2;STRN;CDK12;BRWD1;EIF4G3;RERE;DIDO1;SETD2;USP33;SMG1P5;LYST;SYNE2;SYNE1;AKAP13;NIPBL;C16ORF72;AKAP11;ADAMTSL3;ZNF407;ERC1;DST;NCOA6;VPS13C;VPS13D;ARAP2;VPS13B;ASH1L;ARID1B;FAM153A;BIRC6;KDM7A;NFAT5;WDR26;ROCK1;RNF38;RGPD6;RGPD8;MIPOL1;FGD4;SCAF8;KIAA1328;HECTD1;HECTD4;ANKRD36BP2;PCNT;ATP9B;RANBP2;ARFGEF1;SPEN;USP25;MBD5;MON2;PNPLA7;TRAPPC10;MGA;ERBIN;YLP1;ADAM32;DDHD1;HIPK1;MYO9A;TTL5;APLF;FRYL;TNRC6B |
| PKNOX2<br>human tf<br>ARCHS4<br>coexpression | 110/299 | 3.5978703460<br>84322E-12  | CTNND2;RORB;ADARB2;SOGA1;MYLK3;RIMS1;RPS6KA5;ZNF608;TNFR;KIF21B;SOX5;PPFIA2;GUCY1A2;RBFOX1;MEF2C;EPHA6;KCNH5;TMEM178B;CACNA2D1;TMOD2;TTC7B;ANK2;FRMD4A;ANK3;SHISA9;TANC2;CLIP1;WDPCP;DGKI;FTO;STXBP1;AGAP1;ILDR2;KALRN;ORC4;NUAK1;DPP6;FLRT2;MAP2;FUT9;ZNF704;SRGAP3;KLHL29;ZFX3;AUTS2;MICAL3;MYO5A;HOOK3;GRIN2B;DCLK1;PBX1;PTPRD;CCDC88A;DLG2;DAB1;NBEA;WNK2;FAT3;FAT4;FBXL7;ROBO2;ZNF891;DOCK3;TENM4;PTPRO;GRIK3;ROBO1;GRM7;CA5A;TRIM2;ADAMTSL3;MCF2L;RASGEF1C;OPA3;PSD3;DLGAP1;ZNF385D;NEO1;TRPC5;ABCC9;SORCS3;KLF15;AJAP1;MPPED1;NAV3;LRRC7;PEAK1;CNKSR3;KIAA1328;HECTD4;NCAM1;PAK3;CSMD1;ATP9B;ATP9A;ARNT2;FARP1;NEGR1;ANKRD30BL;NTRK3;LSAMP;YLP1;KIAA1549L;MEIS2;PDE10A;APC;PPP2R2B;NEDD4;RGS12;ASB3                        |
| NFIA<br>human tf<br>ARCHS4<br>coexpression   | 109/299 | 9.0384057709<br>08416E-12  | MYT1L;ANKRD36;CDH7;SRGAP2C;AKT3;KIF21A;SRGAP2B;SOX5;PPFIA2;RGS7;GUCY1A2;EPHA7;CXADR;ZNF160;MAGI2;RFX3;KAZN;ANK2;CDKAL1;FRMD4B;ADGRB3;AKAP9;HECW1;KCNQ3;ZFPM2;GRIA1;INO80D;CTTNBP2;BTFL3L4;NEDD4L;BAZ2B;NYAP2;NPAS3;MAP2;SNTG1;PLXNA2;ANKRD10;SRGAP3;BCL11B;ST8SIA1;BCL11A;INSR;CORO2B;ST18;PTPRD;CCDC88A;DAB1;NBEA;AGO1;FAT3;CNTN3;TCF4;FAT4;FGF12;LRP12;ROBO2;CNTNAP2;TE                                                                                                                                                                                                                                                                                                                                                         |

|                                              |         |                            |                                                                                                                                                                                                                                                                                                                                                                                                                                                                                                                                                                                                                                                                                                                             |
|----------------------------------------------|---------|----------------------------|-----------------------------------------------------------------------------------------------------------------------------------------------------------------------------------------------------------------------------------------------------------------------------------------------------------------------------------------------------------------------------------------------------------------------------------------------------------------------------------------------------------------------------------------------------------------------------------------------------------------------------------------------------------------------------------------------------------------------------|
|                                              |         |                            | NM4;CLCN3P1;PTPRO;GRIK3;ELAVL4;SLC35F1;GRIK2;EFCAB6;BICD1;SYNE2;PTPRG;NHSL1;ADAMTS3;RASGEF1B;LRRTM4;RB1CC1;TMEM108;PHACTR3;ITGB8;GARNL3;MAPK1IP1L;LRRC49;ATRX;ENAH;TOX3;SETBP1;LRRC7;MPPED2;RAPGEF2;ZNF234;SHANK2;SLC24A2;CRB1;TULP4;NOL4;JAM2;PAK5;OPCML;RFTN2;ZNF462;MYEF2;NTRK3;SYT16;SORBS2;PPP2R3A;KIAA0232;NBEAP1;APC;PPP2R2B;TTC3;ASB4;HCN1                                                                                                                                                                                                                                                                                                                                                                          |
| AFF3<br>human tf<br>ARCHS4<br>coexpression   | 108/299 | 2.1555984452<br>683744E-11 | MYT1L;ANKRD36;CTNND2;DPY19L2P2;LDLRAD4;FRY;SLC8A1;CEP128;POTEP;CCDC91;ZSCAN30;PIIP5K2;AKT3;PRKACB;ANKS1B;PPFIA2;POTEC;GUCY1A2;ANKRD36C;MEF2C;PRKCB;PRKCE;TMOD2;MAGI2;ANK2;FRMD4B;SHISA9;GAREM1;AKAP9;HECW1;KCNQ3;WDPCP;ASTN2;ANKRD36B;BLK;KMT2E;GRIA1;TPH2;NREP;KALRN;NPAS3;MAP2;SRGAP3;SCAI;CEP112;ZNF382;AUTS2;SYT1;CADM2;SETDB2;RABL2A;MYO5A;PARP15;GRIN2B;CORO2B;DCLK1;PTPRD;CCDC88A;DLG2;SYNJ1;TCF4;CDK14;PTPRT;DPP10;CCDC122;ZNF891;CELF2;EFCAB6;UNC80;GRM7;TRIM2;ADAMTSL3;RALGPS2;KCND2;NCOA6;VPS13B;TBCL1D9;ASH1L;ARID1B;MPPED1;SETBP1;BANK1;LRRC7;ZMYND11;AKAP6;LRP2;MIPOL1;KIAA1328;GNG7;HECTD4;NRIP1;CLVS2;ANKRD36BP2;NCAM1;ATP9B;NTRK2;MBD5;NTRK3;ADAM32;DDHD1;TTL7;TTC3;NEK10;YPEL1;RAB3GAP2;SSBP2;ASB3;TNRC6B |
| PBRM1<br>human tf<br>ARCHS4<br>coexpression  | 108/299 | 2.1555984452<br>683744E-11 | ANKRD36;ZNF292;LTN1;UBE3A;GRIP1;ZNF608;HERC1;SACS;SMARCA1;EPC2;THSD7A;GTF2I;SMARCC1;FRMD4A;RFX7;AKAP9;WDFY3;UTRN;MACF1;DDX6;TNKS;KMT2C;IREB2;PIK3R3;BAZ2B;NREP;PHF21B;MAP2;ZNF704;BPTF;BCL11B;AUTS2;BCL11A;ZBTB10;PBX1;MED13L;PTPRD;FER;AGO3;TCF4;UBAP1L;FAT4;EIF4G3;SLC44A5;SETD2;TENM4;CHD9;ELAVL4;BICD1;SYNE2;PTPRG;ROBO1;VN1R7P;NIPBL;ZMYM4;PPP2R5E;ZNF407;SPIN1;DNM1L;RBM6;NCOA6;DCC;LRRC49;VPS13C;ATRX;VPS13B;NSUN6;ZDHHC17;ARID1B;PAR3B;ASPM;SFPQ;NCOR1;MP16;DNAJC7;SETBP1;MTF2;BIRC6;PIK3C3;HDAC2;ROCK1;STAU2;MAPK8;KIAA1328;NSD1;ZSWIM6;NCAM1;PAK3;MAP4K4;RANBP2;ARFGEF1;USP24;ATF7IP;ZNF462;MBD5;MYEF2;MGA;YLP1;SYT14;PPP2R3A;MYO9A;GATA2B;PLEKHA8;APC;KANS1L;ASXL3;TTC3;FRYL                                     |
| ZNF638<br>human tf<br>ARCHS4<br>coexpression | 107/299 | 5.2857135666<br>93269E-11  | ATP8A1;CTNND2;DPY19L2P2;LTN1;PTAR1;HERC2;HERC1;ZSCAN30;PIIP5K2;SACS;DIP2B;SAM13;TRIM23;PPFIA2;KCNH1;UNC13C;EPHA4;RALGAP1;TMOD2;WDR72;ANK2;ANK3;UNC5D;ADCY9;HECW2;WDFY3;ASTN1;FTO;MACF1;ZBED9;TNKS;KMT2C;BAZ2B;KALRN;PCNX1;MAP2;FUT9;TRPM7;CEP192;BPTF;CADM2;ST8SIA1;LRBA;PHC3;LRP1B;DLG2;AGO3;FAT3;BRWD1;GABRB1;DOCK3;DOCK9;PPP1R9A;OSBPL10;SYNE1;UNC80;C16ORF72;AKAP11;TRIM2;RB1CC1;EDIL3;VWFP1;ZYG11A;ARHGEF12;DSPT;VPS13C;VPS13D;VPS13B;ASH1L;ZDHHC17;C1QL3;ARID1B;DNM3;HEATR5A;BIRC6;RAPGEF5;PLCB1;SLC24A2;NFAT5;ROCK2;HERC2P3;TULP4;AKAP6;ZDHHC21;MIPO1L1;MAPK9;RANBP3L;KIAA1328;HECTD1;HECTD4;SPOCK3;ATP9B;RANBP2;MBD5;MON2;PCDH9;ATRN1L1;MGA;NTRK3;SYT16;MYO9A;TJP1;POLR3A;APC;PTPN4;ASB3;FRYL                       |
| SOX6<br>human tf<br>ARCHS4<br>coexpression   | 106/299 | 1.2790945942<br>033093E-10 | SEMA5A;ZNF292;ZBTB20;MYLK3;SRGAP2C;DPYSL5;ZSCAN30;ZNF606;TNR;WSB1;ST6GAL2;TMEM178B;MAGI2;RFX3;FRMD4A;IFT81;ADGRB3;RUFY2;AKAP9;SCG3;ASTN2;ZFPM2;ASTN1;KMT2E;TNKS;PDE1A;PCDH15;TPTE2P2;PIK3R3;ILDR2;BAZ2B;NPAS3;MAP2;SNTG1;FUT9;SRGAP3;GRIA4;SPECC1;ANKRD26;SLC14A2;ZNF382;ARHGA28;DCDC1;CCDC88A;AGO3;TMEM236;TCF4;CPEB4;SLC44A5;SPAG16;ROBO2;OSCP1;CCDC122;ZNF891;CHD9;GADL1;SLC35F1;EFCAB6;PPP1R9A;RYR3;UNC80;NHSL1;TRIM2;ADAMTSL3;SNAPC3;ITGB8;NOS1;DENND2C;LRRC49;TCF12;ABCC9;SPTB;EPN2;MMP16;SETBP1;ZNF234;                                                                                                                                                                                                              |

|                                              |         |                            |                                                                                                                                                                                                                                                                                                                                                                                                                                                                                                                                                                                                                                                                                            |
|----------------------------------------------|---------|----------------------------|--------------------------------------------------------------------------------------------------------------------------------------------------------------------------------------------------------------------------------------------------------------------------------------------------------------------------------------------------------------------------------------------------------------------------------------------------------------------------------------------------------------------------------------------------------------------------------------------------------------------------------------------------------------------------------------------|
|                                              |         |                            | CRB1;PLPPR1;LUZP2;NRXN3;NOL4;MIPOL1;FGD4;GNG2;KIAA1328;HECTD2;ANKRD36BP2;JAM2;PAK5;GABRA2;RFTN2;ATF7IP;RIC3;ZNF462;MBD5;NTRK3;LSAMP;PDE4DIP;LHFPL3;MAPK10;APC;KLHL7;TTC3;ASB4;ZNF611;ASB3                                                                                                                                                                                                                                                                                                                                                                                                                                                                                                  |
| ZNF407<br>human tf<br>ARCHS4<br>coexpression | 105/299 | 3.0542293385<br>940733E-10 | ITSN2;ATP8A1;FRY;BACH1;DOCK10;ZFYVE26;DNM1P47;HERC2;PIIP5K2;DIP2B;MAP3K5;MBNL1;MORC3;RALGAPA1;RALGAPA2;AKAP9;RELL1;WDFY3;ZFPM2;UTRN;NOTCH2;MACF1;DDX6;MTMR3;KMT2C;ITPR2;IQGAP1;PCNX1;HIVEP1;CEP192;HIVEP2;CREBBP;LRBA;DENND4C;LNP;DNAJC13;ARHGAP26;SMARCA2;ZZEF1;MED13L;CYLD;DMXL2;SP3;STRN;CCSER1;CDK12;BRWD1;KIAA0825;KDM5A;DOCK5;SETD2;DOCK8;SMG1P2;SMG1P5;PTPRJ;GRK2;LYST;SYNE2;SYNE1;AKAP13;NIPBL;C16ORF72;JAK2;PCMTD1;ITGA4;DST;VPS13C;VPS13D;ARAP2;VPS13B;ASH1L;PARP8;PHF20L1;NCOR1;DPYD;SPOPL;BIRC6;DOCK2;MCTP2;KDM7A;NFAT5;WDR26;ROCK1;HTT;SCAF8;KIAA1328;HECTD1;NSD1;HECTD4;PCNT;ATP9B;RANBP2;ARFGEF1;USP24;USP25;MON2;KDM4C;TRAPPC10;MGA;ERBIN;DDHD1;MYO9A;SNRK;KANSL1;FRYL     |
| AFF4<br>human tf<br>ARCHS4<br>coexpression   | 104/299 | 6.7454698576<br>86141E-10  | APP;TRIO;ZFYVE9;SOGA1;CMIP;ALCAM;HERC1;MPRIIP;SACS;ANKFY1;DIP2B;GTF2I;UNC13B;ILLR1;RALGAPA1;ZBTB38;FNDC3B;AFAP1;FNDC3A;RC3H2;TANC2;TANC1;WDFY3;UTRN;NOTCH2;ANKRD17;MACF1;DDX6;ABHD2;KMT2C;LPP;ACACA;PCNX1;ABL1;HIVEP2;MAP4;CREBBP;EXOC6B;DNAJC13;SYNJ2;PUM1;GNG12;ZZEF1;MED13L;EXT1;DLG5;FAT1;STRN;CDK12;PTPRK;LAMC1;ZCCHC14;AKAP11;SH3PXD2A;KIF13A;ERC1;TEAD1;NEO1;ARHGEF11;ZHX3;ARHGEF12;DST;VPS13C;ARHGEF17;MYOF;VPS13D;ASH1L;ATRNL1;SFPQ;BIRC6;DOCK1;PAFAH1B1;YAP1;NFAT5;RABGAP1;WDR26;ROCK2;HTT;TM9SF3;SCAF8;MAPK8;HECTD1;NSD1;HECTD4;CTNNA1;FLNB;ATP9A;MAP4K4;RANBP2;USP24;SPEN;TRAPPC10;SAMD4A;ERBIN;LAMB1;AP2B1;CDC42BPB;MTOR;PLEKHA8;TJP1;VMP1;SLMAP;ATP13A3;SEC24D               |
| MBNL2<br>human tf<br>ARCHS4<br>coexpression  | 104/299 | 6.7454698576<br>86141E-10  | ATP8A1;FRMPD4;RORA;RPH3A;SYNPR;RPS6KA3;EFR3A;PRKACB;KCNH1;CAST;RBFOX1;LIMCH1;RALGAPA1;PRKE;TMOD2;MTUS1;GABRG2;GABRG1;TOM1L2;TANC1;WDFY3;NGEF;NECAB1;STXBP1;SEL1L;SLC1A2;NDRG2;NALCN;RAP1GAP;GRIN2A;PDZD2;MBP;MAP4;NDFIP2;ABCA5;CADM2;CRIM1;SLC4A10;MYO5A;SYNJ2;HSPA12A;GNG12;ELL2;SNAP91;ARHGAP32;PTPRB;DLG2;SYNJ1;RCAN2;CNTN1;CPE;STRN;SCN2A;CPEB4;RNF11;DOCK9;DIRAS2;RASGRF1;PTPRK;SYNE1;AKAP11;UBL3;TRIM2;KIF13A;PSD3;EDIL3;PCMTD1;ARHGEF12;DST;SLC2A13;VPS13D;ARAP2;COBL;KCNAB1;MYRIP;SYN2;DNM3;KCNMA1;PLCB1;RAPGEF4;SLC24A2;NFAT5;ROCK2;ADAM22;KIAA0513;ABLM1;SV2B;CHN1;SPOCK3;SPOCK1;CTNNA3;GPR158;ATP9A;OPCML;PCGF5;ATRNL1;SAMD4A;SYT16;KIAA1549L;PDE4DIP;ATP2B2;TTLL7;TJP1;PPP2R2C |
| HELZ<br>human tf<br>ARCHS4<br>coexpression   | 104/299 | 6.7454698576<br>86141E-10  | RORA;ETS1;DOCK10;PTAR1;HERC1;THSD7A;MBNL1;MORC3;PRKCH;RALGAPA1;RALGAPA2;ADAM10;INPP4B;WDFY3;UTRN;KMT2E;ANKRD17;MACF1;DDX6;KMT2C;ITPR2;LPP;RASGRP1;PCNX1;HIVEP1;TRPM7;CEP192;HIVEP2;BPTF;MAP2K6;CREBBP;RABGAP1L;ARPP21;LRBA;DENND4C;LNPEP;DNAJC13;SMARCA2;PHC3;ZZEF1;MED13L;CYLD;SP3;BCL2;STRN;CDK12;BRWD1;SETD2;USP32;DOCK8;SMG1P2;LYST;SYNE2;SYNE1;AKAP13;NIPBL;C16ORF72;ZNF407;KDM6A;KLF12;ARHGEF12;ITGA4;DST;VPS13C;VPS13D;ARAP2;VPS13B;ASH1L;ARID1B;PARP8;BIRC6;PIK3C3;DOCK2;MCTP2;KDM7A;NFAT5;WDR26;ROCK1;HTT;SCAF8;BTAFL1;KIAA1328;HECTD1;NSD1;HECTD4;RANBP2;ARFGEF1;USP24;SPEN;MBD5;MON2;KDM4C;TRAPPC10;MGA;ERBIN;YLPM1;ADAM32;DDHD1;HIPK1;MYO9A;GATAD2B;KANSL1;SLMAP;UNC79         |

|                                               |         |                           |                                                                                                                                                                                                                                                                                                                                                                                                                                                                                                                                                                                                                                                                       |
|-----------------------------------------------|---------|---------------------------|-----------------------------------------------------------------------------------------------------------------------------------------------------------------------------------------------------------------------------------------------------------------------------------------------------------------------------------------------------------------------------------------------------------------------------------------------------------------------------------------------------------------------------------------------------------------------------------------------------------------------------------------------------------------------|
| ZNF91<br>human tf<br>ARCHS4<br>coexpression   | 103/299 | 1.5707670061<br>403296E-9 | MYT1L;ANKRD36;ZNF292;ZBTB20;UBE3A;PPIP5K2;AKT3;KIF21A;SOX6;GUCY1A2;EPHA6;WSB1;CXADR;RALGAP A1;SEMA6D;TMOD2;MAGI2;RFX3;ANK2;ANK3;TANC2;RUFY2;AKAP9;ASTN2;CFAP97;ANKRD36B;TNKS;BAZ2B;NREP;NYAP2;KALRN;ORC4;MAP2;SNTG1;FUT9;SRGAP3;SCAI;ZNF382;RANBP17;GRIN2B;PTPRD;CCDC88A;CNOT7;DLG2;NBEA;FAT3;CCSER1;TCF4;BRWD1;COPS8;CPEB4;SLC44A5;ROBO2;ZNF891;SETD2;CHD9;PTPRO;ELAVL4;SMG1P5;EFCAB6;PPP1R9A;UNC80;GRM7;TRIM2;RB1CC1;TMEM108;TLK1;PCMTD1;DST;LRRC49;ATRX;ASH1L;FAM126B;PJA2;NAV3;SETBP1;LRRC7;NRXN3;TULP4;AKAP6;NOL4;MIPOL1;FBXL20;FGD4;MAPK8;GNG2;HECTD2;ZNF627;PAK3;MBD5;NTRK3;SYT16;DDHD1;DEFB108B;MAPK10;APC;KLHL7;ASXL3;TTC3;PTPN4;SSBP2;ASB3;TNRC6B           |
| ZKSCAN1<br>human tf<br>ARCHS4<br>coexpression | 102/299 | 3.6073487754<br>967736E-9 | ERO1B;ANKRD36;TUSC3;ZNF292;ZBTB20;MSI2;RPS6KA5;ZNF606;PPIP5K2;LONP2;LUC7L;KIF21A;SOX6;MAGI1;ANKRD36C;WSB1;RALGAP1;MAGI2;RFX3;TANC2;IFT81;AKAP9;SCG5;WDPCP;SCG3;ASTN2;ANKRD36B;ZNF397;FTO;STXBP4;PIK3R3;BAZ2B;NALCN;LPP;NPAS3;ORC4;FAM83F;MAP2;SRGAP3;SLC14A2;PTPRN2;CADM1;ZNF382;PUM1;ST18;DCDC1;CCDC88A;AGO3;TMEM236;TMEM116;CPE;XKR6;PCSK2;SPAG16;CCDC122;ZNF891;CHD9;ELAVL4;PPP1R9A;PCMTD2;UNC80;CA5A;TRIM2;ADAMTSL3;GATAD1;GDAP1L1;ITGB8;ARFGEF3;TCF12;HUNK;COBL;ARID1B;ZFP90;EPN2;PLCB4;EVC;SETBP1;PEAK1;CNKSR3;RGPD5;HERC2P9;NOL4;MIPOL1;FBXL20;FGD4;KIAA1328;PAK3;ZNF462;FARP1;MBD5;MYEF2;CADPS;ELP2;C10RF21;SORBS2;ZDHHC11B;NEDD4;TTC3;ASB4;RGS12;ASB3;TNRC6B |
| ST18<br>human tf<br>ARCHS4<br>coexpression    | 101/299 | 7.7278869028<br>66618E-9  | ERO1B;MYT1L;DGKB;CDH7;RIMS2;DPYSL5;AKT3;KIF21A;ANKS1B;EPHA7;MAGI2;MTUS2;EBF2;CDKAL1;MYT1;SHISA6;RUFY2;AKAP9;HECW1;KCNQ3;SCG5;SCG3;RIN2;TNKS;STXBP1;BTF3L4;BAZ2B;NREP;NYAP2;KALRN;NALCN;MTMR7;DPP6;MAP2;SNTG1;SRGAP3;PTPRN2;CADM1;ZNF382;BCL11A;SLC4A10;SNAP91;PTPRD;CCDC88A;PLCXD3;CNTN1;CPE;CPEB4;PCSK2;GABRB3;ROBO2;ZNF891;ELAVL4;GRIK2;EFCAB6;PPP1R9A;BICD1;UNC80;RASGEF1B;TRIM2;MCF2L;RB1CC1;HYDIN2;EDIL3;ARFGEF3;KCND3;DCC;LRRC49;SEZ6L;SETBP1;SAMD5;SLC24A2;CRB1;PPM1L;ATL1;NRXN3;TULP4;AKAP6;TMEM163;NOL4;CLVS2;NCAM1;CTNNA2;CSMD3;PAK3;MBD5;MYEF2;PCDH9;NTRK3;CADPS;SYT16;SORBS2;TTL7;MAPK10;NFI B;ASXL3;TTC3;RIMBP2;APBA2;ASB3;HCN1                          |
| ZNF462<br>human tf<br>ARCHS4<br>coexpression  | 101/299 | 7.7278869028<br>66618E-9  | ZNF292;ZBTB20;IGF1R;RIMS2;ZNF608;CDH2;DPYSL5;SNRPD1;KIF21A;PPF1A2;MAGI1;EPHA4;SMARCC1;CXADR;RFX3;ANK3;MYT1;PYGO1;IFT81;AKAP9;ZNF431;ZNF397;BTF3L4;NEDD4L;ILDR2;BAZ2B;NREP;KALRN;ACACA;PHF21B;APELA;MAP2;ZNF704;CAMTA1;SRGAP3;ZNF423;MPDZ;BPTF;CADM1;ZNF382;AUTS2;PBX1;PTPRD;CCDC88A;WNK2;AGO1;ZNF536;FAT3;TCF4;GABRB3;ROBO2;ZNF891;DRAXIN;TENM4;CHD6;PSIP1;PPP1R9A;BICD1;TTC28;TRIM2;ADAMTSL3;SUMO2;JARID2;ARFGEF3;USP49;ADGRV1;LRRC49;ATRX;SHROOM2;HUNK;TET1;NAV2;IL17RD;ARID1B;NAALADL2;ENAH;NCOR1;SETBP1;HDAC2;PRUNE2;TULP4;STOX2;CECR2;HECTD2;APBB2;NCAM1;PAK5;FARP1;MYEF2;SLC16A1;YLP1;TJP1;ATAT1;ZNF738;KLHL7;TTC3;YPEL1;RGS12;KIAA1958;ADGRL2;TNRC6B           |
| NCOA1<br>human tf<br>ARCHS4<br>coexpression   | 101/299 | 7.7278869028<br>66618E-9  | ITSN2;ATP8A1;RORA;FRY;HERC1;KIF21B;DIP2B;ANKS1B;MAP3K5;RFXO1;MBNL1;PRKCB;RALGAP1;TMOD2;ANK2;ANK3;IPCEF1;MADD;WDFY3;UTRN;MACF1;DDX6;MTMR3;KMT2C;KALRN;MED12L;GRIN2A;PCNX1;ATXN1;HIVEP2;LYN;CREBBP;IQSEC1;MYO5A;LNPEP;FOXN3;ARHGA26;SMARCA2;PHC3;GRIN2B;ZZEF1;MED13L;CYLD;DLG2;SYNJ1;GNAQ;DMXL2;FAT3;STRN;MTMR10;CPQ;DOCK8                                                                                                                                                                                                                                                                                                                                              |

|                                              |         |                           |                                                                                                                                                                                                                                                                                                                                                                                                                                                                                                                                                                                                                                                                                                                                                                                      |
|----------------------------------------------|---------|---------------------------|--------------------------------------------------------------------------------------------------------------------------------------------------------------------------------------------------------------------------------------------------------------------------------------------------------------------------------------------------------------------------------------------------------------------------------------------------------------------------------------------------------------------------------------------------------------------------------------------------------------------------------------------------------------------------------------------------------------------------------------------------------------------------------------|
|                                              |         |                           | ; CELF2; DYSF; PTPRJ; HTR2A; LYST; RYR3; SYNE2; GRM1; SYNE1; UNC80; SENP6; AKAP13; GLT1D1; AKAP11; ADGRE3; CNOT6L; VPS13C; VPS13D; ARAP2; VPS13B; ASH1L; FAM126B; IL17RA; PARP8; CNKSR2; TTPKB; RAPGEF2; PLCB1; DOCK2; MCTP2; KDM7A; SLC24A2; ADAM22; AOA; KIAA0513; HECTD4; MAPK1; GABBR2; SEMA4D; PCGF5; PLCL1; ERBIN; PDE4DIP; ATP2B2; MYO9A; SNRK; APC; CAMK4; PTPN4                                                                                                                                                                                                                                                                                                                                                                                                             |
| POU3F2<br>human tf<br>ARCHS4<br>coexpression | 100/299 | 1.6839264537<br>274902E-8 | MYT1L; CTNND2; LDLRAD3; CELSR2; CDH4; DACH1; CDH2; DPYSL5; KIF21A; EPHB2; EPHB1; MAGI1; ANKRD36C; WSB1; ST6GAL2; TMEM178B; RFX3; EBF3; ANK2; FRMD4A; ADGRB3; RUFY2; TNKS; CHRNA7; NTM; PIK3R3; ILDR2; NREP; KALRN; NPAS3; PHF21B; NKAIN3; MAP2; ZNF704; PLXNA2; MAP6; CAMTA1; SRGAP3; WSCD1; ST8SIA1; NETO2; CORO2B; DCLK1; PBX1; PTPRD; CCDC88A; RNF182; FAT3; TCF4; SLC44A5; ROBO2; DRAXIN; TENM4; ELAVL4; TSPAN11; ROBO1; GRM3; TRIM2; DNER; ITGB8; ADGRV1; DCC; LRRC49; TCF12; HUNK; TOX3; GAP43; ZEB1; MPPED1; SETBP1; LRRC7; ZNF780B; HDAC2; STOX2; GTF2IP1; GNG2; ZSWIM6; NCAM1; CTNNA2; PAK3; JAM2; PAK5; ATP9A; MAP4K4; ARNT2; MYEF2; NTRK3; ENOX1; TTLL7; ATAT1; MAPK10; NELL2; FABP7; ASXL3; TTC3; YPEL1; RGS12; APBA2; ADGRL2; SPSB4                                     |
| CHD9<br>human tf<br>ARCHS4<br>coexpression   | 100/299 | 1.6839264537<br>274902E-8 | ZBTB25; ANKRD36; ZNF292; FRG1HP; ZBTB20; UBE3A; SRGAP2C; CNST; PPIP5K2; AKT3; DLEU1; KIF21A; SOX6; SCAPER; SRGAP2B; ANKS1B; ANKRD36C; WSB1; RALGAP1; KCNH8; MAGI2; ANK2; IFT81; AKAP9; ZNF438; ASTN2; ZNF675; ANKRD36B; KMT2E; SHC4; STXBP4; KMT2C; BAZ2B; FGGY; MAP2; SNTG1; TTC21B; ANKRD10; LRRC4C; BPTF; PRELID2; SLC14A2; CDCDC1; CCDC88A; FER; AGO3; CEP83; TCF4; BRWD1; DPP10; ZNF891; USP33; EFCAB6; PPP1R9A; SYNE2; SENP6; EPB41L4A; LRRTM4; TRIM2; ADAMTSL3; GABPA; DST; GRID1; LRRC49; VPS13C; ATRX; VPS13B; ARID1B; ZFP90; PCCA; SETBP1; PEAK1; MPPED2; USP41; SDCCAG8; CRB1; CATSPER2; RGPD6; RGPD5; MIPOL1; ATP6AP1L; FBXL20; KIAA1328; ANKRD36BP2; PAK3; ATP9B; JAM2; S100PBP; MBD5; MYEF2; CDC42BPA; MAPK10; MAB21L3; APC; NEDD4; TTC3; SSBP2; ASB3; ZNF354C; TNRC6B |
| PLXNA2<br>human tf<br>ARCHS4<br>coexpression | 99/299  | 3.6243832076<br>160924E-8 | APP; MYT1L; CTNND2; SOGA1; CELSR2; CDH5; CDH4; MPRIP; DPYSL5; PEG10; AKT3; KIF21B; EPHB2; PPFIA2; MAGI1; RBFOX1; TMEM178B; CACNA2D1; TMOD2; AFAP1; KAZN; ANK2; FRMD4A; HSPG2; TANC2; MAPK8IP1; COL4A2; HECW2; SCN8A; KCNQ3; WDFY3; TNIK; GRIA1; IGSF3; STXBP1; AGAP1; NREP; KALRN; FAM171A1; CTIF; MAP2; ZNF704; EPB41L3; MAP4; SRGAP3; NDFIP1; AUTS2; SYT1; NETO2; CORO2B; DCLK1; SNAP91; PTPRD; SDK1; PTPRB; WNK2; DLG5; SPIRE1; FAT4; DOCK4; TENM4; DOCK9; MAST2; GRIK3; ECE1; SIPA1L2; ROBO1; TRIM2; MCF2L; NCS1; PHACTR3; NEO1; FAM219A; NAV2; RGM; MPPED1; SETBP1; LRRC7; PAFAH1B1; STOX2; GNG2; HECTD4; GTF2IP4; MVB12B; NCAM1; CTNNA2; PAK5; ATP9A; MAP4K4; ARNT2; NTRK3; KIAA1549L; CDC42BPB; MEIS2; SGSM1; APC; NFIB; TTC3; APBA2                                          |
| BDP1<br>human tf<br>ARCHS4<br>coexpression   | 99/299  | 3.6243832076<br>160924E-8 | TCERG1; ZFYVE9; ANKRD36; ZNF292; HNRNPU; UBE3A; CWC27; HERC2; HERC1; SACS; PPFIA2; POTEC; ANKRD36C; ESCO1; RALGAP1; ZNF271P; ANK2; AKAP9; WDPCP; WDFY3; ZNF678; ASTN2; UTRN; ANKRD36B; ANKRD17; MACF1; DDX6; TBC1D19; KMT2C; BAZ2B; TTC21B; ANKRD20A5P; CEP192; BPTF; LRBA; ZBTB10; CCDC88A; AGO3; NBEA; FAT3; CCSER1; TCF4; CDK12; BRWD1; SETD2; USP33; SYNE2; AKAP13; NIPBL; NHSL1; ADAMTSL3; KDM6A; TTC37; ARHGEF12; DST; VPS13C; VPS13D; ATRX; VPS13B; ASH1L; ARID1B; SUPT3H; SFPQ; NCOR1; LRRC7; PEAK1; BIRC6; ZNF236; NFAT5; ROCK1; ROCK2; RGPD6; MIPOL1; KIAA1328; NSD1; ANKRD36BP2; PCNT; ATP9B; RANBP2; ARFGEF1; USP24; SPEN; USP25; MBD5; MGA; ERBIN; YLPM1; ADAM32; DDHD1; MYO9A; KTN1; MAB21L3; APC; CAMK4; NEDD4; PTPN4; FRYL; TNRC6B; CCD171                           |

|                                             |        |                           |                                                                                                                                                                                                                                                                                                                                                                                                                                                                                                                                                                                                                                             |
|---------------------------------------------|--------|---------------------------|---------------------------------------------------------------------------------------------------------------------------------------------------------------------------------------------------------------------------------------------------------------------------------------------------------------------------------------------------------------------------------------------------------------------------------------------------------------------------------------------------------------------------------------------------------------------------------------------------------------------------------------------|
| SMAD4<br>human tf<br>ARCHS4<br>coexpression | 98/299 | 7.5279230169<br>59694E-8  | PATJ;ZFYVE9;XYLT1;HNRNPU;PTAR1;HERC2;ZNF608;HERC1;SACS;DIP2B;GTF2I;UNC13B;CADPS2;SMARCC1;RALGAPA1;RALGAPA2;ADAM10;WDFY3;UTRN;NOTCH2;MACF1;DDX6;KMT2C;IREB2;LPP;ARHGAP12;PCNX1;CEP192;MPDZ;BPTF;CREBBP;LRBA;DENND4C;LNPEP;DNAJC13;FOXN3;PUM1;ZZEF1;MED13L;AGO2;SP3;FAT1;STRN;BRWD1;FGF10;TENM4;SYNE2;PTPRG;AKAP13;NIPBL;C16ORF72;AKAP11;ZMYM4;KIF13A;TEAD1;NEO1;ARHGEF12;DST;VPS13C;VPS13D;VPS13B;ASH1L;VCAN;SFPQ;ELF2;SPOPL;BIRC6;DOCK1;KDM7A;NFAT5;WDR26;ROCK2;HTT;ZDHHC21;TM9SF3;CECR2;SCAF8;BTAF1;HECTD1;NSD1;HECTD4;RANBP2;ARFGEF1;USP24;SVIL;MON2;TRAPP C10;MGA;ERBIN;PTPN13;MYO9A;MTOR;PLEKHA8;TJP1;ITCH;SLMAP;PKN2;ADGRL2            |
| ELK4<br>human tf<br>ARCHS4<br>coexpression  | 98/299 | 7.5279230169<br>59694E-8  | ITSN2;PATJ;MAML2;CEP120;RORA;ETS1;DOCK10;POTEM;PTAR1;HERC1;CAST;MBNL1;PRKCH;ENTPD5;RALGAPA2;TC2N;RUNX1;INPP4B;ZNF831;NOTCH2;MACF1;DDX6;CASZ1;ABHD2;KMT2C;ITPR2;BAZ2A;IQGAP1;LPP;RASGRP1;PCNX1;TRPM7;HIVEP2;CREBBP;LRBA;DENND4C;LNPEP;FOXN3;SMARCA2;PHC3;PARP15;FLI1;ZZEF1;MED13L;CYLD;AGO2;SP3;BCL2;STRN;CDK12;DOCK9;DOCK8;EFCAB14;PTPRJ;LIMD1;SYNE2;AKAP13;NIPBL;LRRFIP1;ABCC4;CNOT6L;ARHGEF12;ITGA4;VPS13C;VPS13D;ARAP2;VPS13B;ASH1L;ARID1B;PARP8;PACS1;BIRC6;DOCK2;MCTP2;KDM7A;NFAT5;WDR26;DNAH8;NLRC5;KIAA1328;HECTD1;NSD1;HECTD4;PDLIM5;RANBP2;ARFGEF1;USP24;OR51E1;SEMA4D;PLEKHA2;STAT1;TRAPPC10;ERBIN;HIPK1;GATAD2B;SNRK;SLMAP;ESYT2 |
| GLIS3<br>human tf<br>ARCHS4<br>coexpression | 98/299 | 7.5279230169<br>59694E-8  | APP;ERO1B;TRIO;MAML2;TUSC3;WWC1;ZBTB20;SLC4A4;IGF1R;SCGN;C1ORF127;ALCAM;CDH2;PEG10;IL1R1;FNDC3B;AFAP1;RFX3;ARID5B;FNDC3A;STON1-GTF2A1L;TANC2;RRAGD;SCG5;SCG3;MXRA7;RIN2;RAI14;SDC2;ARHGEF28;SEL1L;FBLN5;NPAS3;CALD1;ARSJ;SNX9;TSPAN3;MPDZ;ARSB;STARD13;VCAM1;NEK6;PXDNL;GNG12;ELL2;IGSF11;MOB1B;SDK1;RCAN1;PLCXD3;C1OL5A1;PTPRA;DLG5;GNAS;STT3A;CPE;SPAG16;NRP1;TENM3;ECE1;FMN2;LAMC1;HYDIN;ITGB8;TEAD1;NEO1;DST;NCOA6;ABCC8;ANXA4;MYOF;NAV2;PARD3B;EVC;HEATR5A;KCNMA1;MYO3A;DOCK1;CD44;CHST3;DNAH5;DNAH6;RGPD6;FSTL1;SLC7A2;THSD4;ERICH5;CTNNA1;MAP4K4;NTRK2;LAMB1;CDC42BPB;CDC42BPA;TJP1;SPSB1;TTC6;SEC24D;CCL28                          |
| FOXG1<br>human tf<br>ARCHS4<br>coexpression | 97/299 | 1.6161399679<br>560872E-7 | MYT1L;ANKRD36;ZNF292;CTNND2;RORB;CDH4;CDH2;DPYSL5;AKT3;LUC7L;KIF21A;ZNF721;SOX6;SOX5;PPFIA2;RGS7;EPHA4;ANKRD36C;CXADR;MAGI2;RFX3;ANK2;EML1;GAREM1;IFT81;RUFY2;AKAP9;HECW1;KCNQ3;AMPH;ASTN1;GRIA1;CTTNBP2;TNKS;NTM;NEDD4L;BAZ2B;NREP;KALRN;PHF21B;MAP2;FUT9;ZNF704;PRDM16;SRGAP3;MPDZ;ZNF382;ST8SIA1;CORO2B;ST18;PTPRD;CCDC88A;DLG2;DAB1;NBEA;RNF182;TCF4;SLC44A5;ROBO2;TENM4;GRIK3;ELAVL4;BICD1;GLI3;SYNE2;GLI2;TTC28;NHSL1;LRRTM4;TRIM2;MAPK1IP1L;LRRC49;ATRX;IL17RD;ENAH;C12ORF4;MPPED1;SETBP1;LRRC7;MPPED2;CRRB1;PHLPP1;STOX2;NCAM1;CTNNA2;PAK5;MYEF2;NTRK3;TTLL7;ATAT1;NELL2;MAB21L3;NFIA;APC;NFIB;KLHL7;TTC3                           |
| ZMAT3<br>human tf<br>ARCHS4<br>coexpression | 96/299 | 3.2098623590<br>077647E-7 | SEMA5A;APP;RNF11;TRIO;ANKRD33B;ECE1;LAMC1;ANTXR1;SLC8A1;GALNT10;LOXL2;ADAMTSL1;TRIM9;SPRED1;ADAMTS2;AKAP11;SH3PXD2A;RPS6KA2;NCS1;PSD3;SACS;VSTM4;TEAD1;PAMR1;EDIL3;ZNF124;KCNH1;ZHX3;ARHGEF12;DST;ZBTB38;ARHGEF17;MYOF;TMOD2;FNDC3B;AFAP1;FRMD6;EVC;COL4A2;HECW2;KCNMA1;CDC42EP3;CDH11;WDFY3;MXRA7;DOCK1;DGKI;CHST3;PAFAH1B1;MACF1;NFAT5;ROCK1;TWIST2;TMTC1;NLK;FSTL1;TRHDE;LTBP1;FBLN5;CTIF;ATXN1;CALD1;ARSJ;SNX25;MGAT5;CHN1;CLVS2;SPOCK1;KCNN3;MAP4;ATP9A;MAP4K                                                                                                                                                                          |

|                                              |        |                           |                                                                                                                                                                                                                                                                                                                                                                                                                                                                                                                                                                                                                                              |
|----------------------------------------------|--------|---------------------------|----------------------------------------------------------------------------------------------------------------------------------------------------------------------------------------------------------------------------------------------------------------------------------------------------------------------------------------------------------------------------------------------------------------------------------------------------------------------------------------------------------------------------------------------------------------------------------------------------------------------------------------------|
|                                              |        |                           | 4;NTRK2;STARD13;EGLN3;CADM2;NEK6;RFTN1;NEK7;SAMD4A;CRIM1;SYT16;MYO5A;CYBRD1;LAMB1;GNG12;DCLK1;EXT1;ARHGAP31;COL5A1;FAT1;ITGBL1;SPIRE1;RGL1;SEC24D;FBN1                                                                                                                                                                                                                                                                                                                                                                                                                                                                                       |
| ZNF827<br>human tf<br>ARCHS4<br>coexpression | 96/299 | 3.2098623590<br>077647E-7 | DPP10;DRAXIN;MYT1L;CHD9;SYCP1;ZNF292;CTNND2;ZBTB20;MSI2;PPP1R9A;BICD1;TSPAN11;PTPRG;IGF1R;ZNF608;NHS1;DACH1;CDH2;SCN11A;ADAMTSL3;ITGB8;KIF21A;STK32A;PPFIA2;CFAP44;MAGI1;USP49;TMEM178B;CACNA2D1;LRRC49;ATRX;HUNK;RFX3;FRMD4A;IL17RD;RGM;ZDHHC17;MYT1;ARID1B;ENAH;SETBP1;PEAK1;AKAP9;SCG3;ASTN2;ZNF236;ARHGEF7;ZNF431;ANKRD17;TNKS;TSSC2;CHRNA7;NEDD4L;AGAP1;ILDR2;BAZ2B;NREP;MIPOL1;NPAS3;PHF21B;STOX2;PDCD6IP2;MAP2;SNTG1;FUT9;MAP6;NCAM1;SRGAP3;JAM2;S100PBP;BPTF;ZNF541;ZNF462;FARP1;MYEF2;AUTS2;NTRK3;RANBP17;CADPS;SORBS2;HOOK3;DCLK1;PBX1;PTPRD;MAB21L3;CCDC88A;AGO3;NFIA;PPP2R2B;ASXL3;TTC3;RIMBP2;RNF182;TCF4;UBAP1L;TNRC6B         |
| BAZ2B<br>human tf<br>ARCHS4<br>coexpression  | 96/299 | 3.2098623590<br>077647E-7 | DPP10;KDM5A;CCDC122;ZNF891;ANKRD36;CHD9;ZNF292;USP33;GADL1;ELAVL4;FRG1HP;ZBTB20;EFCAB6;PPP1R9A;MYLK3;SYNE2;UNC80;EPB41L4A;DACH1;ZSCAN30;PIIP5K2;CA5A;ADAMTSL3;GATAD1;SCAPER;POTEC;MAGI1;ANKRD36C;WSB1;LRRC49;KCNH8;MAGI2;ATRX;RFX3;VPS13B;FAM126B;SHISA9;ARID1B;SLC9A4;PCCA;SETBP1;IFT81;PEAK1;CATSPERG;RUFY2;AKAP9;WDPCP;WDFY3;ASTN2;ANKRD36B;SDCCAG8;ZNF431;FTO;KMT2E;CRB1;KCNE4;KMT2C;RGPD5;MIPOL1;STK3;FBXL20;FGD4;ORC4;FGGY;KIAA1328;MAP2;SNTG1;MAP6;ANKRD36BP2;AP4S1;CSMD3;SRGAP3;LRRC4C;ATP9B;BPTF;RFTN2;MBD5;MYEF2;ZNF382;RANBP17;ADAM32;ARHGAP28;DDHD1;ST18;DCDC1;MAPK10;MAB21L3;CCDC88A;FER;AGO3;NEDD4;TTC3;BRWD1;ASB3;FRYL;TNRC6B |
| NCOR1<br>human tf<br>ARCHS4<br>coexpression  | 96/299 | 3.2098623590<br>077647E-7 | ZNF891;SETD2;ZBTB25;DOCK8;DPY19L2P2;GADL1;MSI2;SYNE2;TTC28;SYNE1;UNC80;AKAP13;ZFVYE26;NIPBL;HERC2;HERC1;CA5A;ADAMTSL3;ZNF407;ERC1;GTF2I;MAP3K5;USP8;MBNL1;ARHGEF12;RALGAP1;RALGAP2;VPS13C;VPS13D;TTC7B;ANK3;ASH1L;NBPF1;ARID1B;ZDHHC14;PEAK1;AKAP9;CNKSR3;WDPCP;WDFY3;BIRC6;ASTN2;UTRN;ANAPC1;FTO;KMT2E;ANKRD17;MACF1;NFAT5;KMT2C;ITPR2;ATP10B;BAZ2B;ZC3HAV1;LPP;MIPOL1;FBXL20;ATXN3;PCNX1;KIAA1328;NSD1;HECTD4;ANKRD36BP2;PCNT;ATP9B;BPTF;SPECC1;ARHGEF1;USP24;SPEN;ZNF462;CREBBP;RABGAP1L;MBD5;LRBA;MGA;DENND4C;YLP1;ADAM32;LNPEP;HOOK3;DDHD1;PHC3;PARP15;MYO9A;ZZEF1;MED13L;ARHGAP32;AGO3;KANSL1;NEDD4;CDK12;BRWD1;ASB3;FRYL;TNRC6B       |
| CUX2<br>human tf<br>ARCHS4<br>coexpression   | 95/299 | 6.2041203322<br>03394E-7  | SLC44A5;RERE;DOCK3;TENM4;FRMPD4;MYT1L;ANKRD36;CTNND2;SLC8A1;RPH3A;CDH4;ZNF608;GRM7;DPYSL5;TRIM2;MCF2L;NCS1;PHACTR3;KIF21A;DLGAP1;KIF21B;NEO1;PPFIA2;ANKRD36C;RBFOX1;MEF2C;KCNH5;TMEM178B;CACNA2D1;TMOD2;CYP4A11;ANK2;ANK3;MYRIP;SYN2;MAPK8IP1;MPPED1;SETBP1;LRRC7;SCN8A;ARHGEF7;NGEF;SHANK2;ASTN1;CTTNBP2;STXBP1;PLPPR5;ADAM22;KALRN;PRSS51;CTIF;SV2B;MAP2;FUT9;ZNF704;HECTD4;CHN1;PLXNA2;CLVS2;NCAM1;CTNNA2;SRGAP3;CACNG3;PAK5;ATP9A;GABBR2;ARNT2;LINGO1;ANKRD24;AUTS2;SYT1;CADM2;NTRK3;KIAA1549L;MYO5A;ATP2B2;HSPA12A;GRIN2B;CORO2B;DCLK1;PBX1;SNAP91;PTPRD;CYP2C9;DLG2;NBEA;APC;PPP2R2C;PPP2R2B;WNK2;ASXL3;FAT3;TCF4;SCN2A;APBA2          |
| SOX9<br>human tf<br>ARCHS4<br>coexpression   | 95/299 | 6.2041203322<br>03394E-7  | APP;SPON1;TENM4;MEGF10;CTNND2;WWC1;ZBTB20;SLC35F1;PTPRK;SLC4A4;CELSR2;GLI3;CMIP;KIF15;SPRED2;GRM5;CDH2;TRIM2;TRPS1;ITGB8;KIF21A;PTGFRN;EPHB2;NEO1;SRGAP2B;ANKRD6;MAGI1;COL27A1;ADGRV1;KCNK10;TMEM178B;TCF12;RFX3;ADGRA3;SLC6A11;SEZ6L;SORCS2;PARD3B;EPN2;PYGO1;TOX3;ASPM;LMX1A                                                                                                                                                                                                                                                                                                                                                               |

|                                              |        |                           |                                                                                                                                                                                                                                                                                                                                                                                                                                                                                                                                                                                                                      |
|----------------------------------------------|--------|---------------------------|----------------------------------------------------------------------------------------------------------------------------------------------------------------------------------------------------------------------------------------------------------------------------------------------------------------------------------------------------------------------------------------------------------------------------------------------------------------------------------------------------------------------------------------------------------------------------------------------------------------------|
|                                              |        |                           | ;SETBP1;ADGRB3;PARD3;MPED2;CHST3;CREB5;FTO;NFAT5;ADCYAP1R1;PHLPP1;NXN;NTM;AGAP1;ILDR2;ASAP2;NTN1;NPAS2;NPAS3;STOX2;RELN;ZNR3;ZNF704;LRIG1;APBB2;SRGAP3;MPDZ;JAM2;MAP4K4;RFTN2;ARNT2;ZNF462;FARP1;NTRK2;DTNA;MYEF2;WSCD1;AUTS2;SGTB;PCDH8;HMG2;BTBD9;CORO2B;PTK2;ARHGAP32;NFIA;FABP7;SMOC1;DLG5;FAT1;RNF182;SPIRE1;NECTIN4                                                                                                                                                                                                                                                                                            |
| ZNF510<br>human tf<br>ARCHS4<br>coexpression | 95/299 | 6.2041203322<br>03394E-7  | DIDO1;LPGAT1;TRIO;ATP8A1;ZFYVE9;DOCK9;USP32;RASGRF2;CEP120;ZBTB21;HNRNP;SYNE1;NIPBL;PTAR1;GRM5;HERC2;ZNF608;AKAP11;HERC1;RB1CC1;SACS;DIP2B;GTF2I;MED1;WDHD1;CD96;KLF12;ARHGEF12;DST;RALGAPA1;PRKCE;VPS13C;TMOD2;VPS13D;VPS13B;ANK2;ASH1L;SFPQ;RABEP1;CSDE1;WDFY3;BIRC6;TNIK;RAPGEF5;UTRN;DGKI;ANAPC1;PAFAH1B1;ANKRD17;MACF1;DDX6;MTPN;KMT2C;ADAM22;HTT;ACACA;TM9SF3;PCNX1;SCAF8;BTAF1;HECTD1;ZNF704;NSD1;HECTD4;GTF2IP4;HIVEP2;ATP9A;RANBP2;ARFGEF1;USP24;SPEN;KDM4C;LRBA;TRAPPC10;MGA;ERBIN;MYO5A;LNPEP;DNAJC13;ESRRG;AP2B1;SMARCA2;ZEF1;MTOR;MED13L;KTN1;APC;CAMK4;SP3;BCL2;FAT3;STRN;CDK12;BRWD1;TAF3             |
| MGA<br>human tf<br>ARCHS4<br>coexpression    | 95/299 | 6.2041203322<br>03394E-7  | LIN54;ZNF891;PATJ;SETD2;SMG1P2;LTN1;ZBTB20;SYNE2;OSBPL10;IGF1R;SYNE1;AKAP13;NIPBL;PTAR1;HERC2;C16ORF72;HERC1;ADAMTSL3;PPP6R3;SACS;ERC1;ZNF121;USP8;AQR;ARHGEF12;ESCO1;DST;RALGAPA1;VPS13C;VPS13D;VPS13B;ASH1L;ARID1B;NCOR1;PEAK1;AKAP9;WDPCP;WDFY3;PIK3C3;ASTN2;UTRN;ANAPC1;FTO;ANKRD17;MACF1;DDX6;NFAT5;RABGAP1;KMT2C;IREB2;TULP4;RGPD5;ITPR2;BAZ2B;THADA;UBR1;MIPOL1;PCNX1;SCAF8;BTAF1;KIAA1328;HECTD1;NSD1;HIVEP1;TRPM7;CEP192;NUP43;MPDZ;ATP9B;BPTF;RANBP2;SPEC1;ARFGEF1;USP24;MBD5;LRBA;DENND4C;ERBIN;ADAM32;LNPEP;HOOK3;PHC3;MYO9A;PTK2;MED13L;TJP1;AGO3;KANSL1;AGO1;NEDD4;CDK12;BRWD1;ASB3;ZNF850;TNRC6B      |
| NCOA2<br>human tf<br>ARCHS4<br>coexpression  | 95/299 | 6.2041203322<br>03394E-7  | ITSN2;RERE;DIDO1;RNF11;LPGAT1;ATP8A1;USP32;DOCK8;EFCAB14;PTPRJ;FRY;BACH1;SIPAL3;LYST;SYNE2;SYNE1;AKAP13;EFR3A;GLT1D1;NIPBL;C16ORF72;HERC1;ZNF407;ADGRE3;DIP2B;JAK2;IL6R;MAP3K5;MBNL1;ARHGEF12;RALGAPA1;RALGAPA2;VPS13C;VPS13D;RAP2;VPS13B;ASH1L;IL17RA;PARP8;DPYD;SPOPL;WDFY3;BIRC6;UTRN;DOCK2;MCTP2;KDM7A;NOTCH2;MACF1;DDX6;NFAT5;MTMR3;WDR26;ABHD2;KMT2C;RNF38;HTT;ITPR2;BAZ2A;CSF2RB;IQGAP1;PCNX1;SCAF8;HECTD1;NSD1;HECTD4;HIVEP2;MARK2;LYN;RANBP2;ARFGEF1;USP24;CREBBP;MGAM;SEMA4D;IQSEC1;PCGF5;LRBA;TRAPPC10;DENND4C;ERBIN;LNPEP;DNAJC13;HIPK1;ARHGAP26;SMARCA2;ZEF1;MED13L;CYLD;SNRK;DMXL2;SP3;STRN;CDK12;FRYL |
| FOXP2<br>human tf<br>ARCHS4<br>coexpression  | 94/299 | 1.1912051206<br>656543E-6 | DPP10;ZNF891;DRAXIN;MYT1L;TUSC3;CELF4;ELAVL4;ZBTB20;GRIK1;GRIK2;EFCAB6;PPP1R9A;TSPAN11;PTPRG;PCMT1;RIMS1;DACH1;ZNF606;ZNF280B;DNER;KIF21A;RALGPS1;ANKS1B;ZNF684;GUCY1A2;CXADR;USP49;TMEM178B;DCC;LRRC49;EBF1;MTUS2;ANK3;MYT1;ARID1B;PGM2L1;SHISA6;ADGRB3;DOK5;AKAP9;AMPH;ALG10B;CDH18;KHDRBS2;RTN1;TSHZ3;CHRNA7;TSHZ2;PLPPR5;TULP4;ZNF66;KLHL13;NREP;NYAP2;FBXL20;ADAM29;DPP6;PDCD6IPP2;GNG2;MAP2;SMIM11B;ZMAT4;MAP6;CAMTA1;ZKSCAN5;NCAM1;CTNNA2;CSMD3;PAK3;MORC2;VAT1L;CLVS1;ZNF382;CNTN5;AUTS2;NEGR1;ST8SIA1;RANBP17;CADPS;PBX3;KLHL1;PBX1;ENOX1;ATAT1;PTPRD;CCDC88A;RALYL;FER;ASXL3;TTC3;ZNF74;BRWD1;LRP12;LHX9   |
| NFIB                                         | 94/299 | 1.1912051206              | SLC44A5;CNTNAP3;CNTNAP2;ATP8A2;USP31;MYT1L;GRK3;UBE3A;GRIK2;BICD1;CDH7;SRGAP2C;NHSL1;ADAM                                                                                                                                                                                                                                                                                                                                                                                                                                                                                                                            |



|                                              |        |                           |                                                                                                                                                                                                                                                                                                                                                                                                                                                                                                                                                                                                                  |
|----------------------------------------------|--------|---------------------------|------------------------------------------------------------------------------------------------------------------------------------------------------------------------------------------------------------------------------------------------------------------------------------------------------------------------------------------------------------------------------------------------------------------------------------------------------------------------------------------------------------------------------------------------------------------------------------------------------------------|
| human tf<br>ARCHS4<br>coexpression           |        | 656543E-6                 | TS3;LRRMT4;RB1CC1;AKT3;TMEM108;PHACTR3;HYDIN2;THSD7A;DNM1L;SRGAP2B;SOX5;GARNL3;PPFIA2;RGS7;GUCY1A2;EPHA7;MEF2C;CXADR;LIMCH1;ZNF160;ATRAX;KAZN;PRKCA;EML1;TIAM2;SETBP1;ADGRB3;LRRC7;AKAP9;MPPED2;MTF2;KCNQ3;RAPGEF2;ZFPM2;ZNF234;SHANK2;ZNF431;GRIA1;SLC24A2;INO80D;CTTNBP2;TNKS;TULP4;NEDD4L;EFNA5;NOL4;CACNA1E;MAP2;PLXNA2;ANKRD20A5P;PAK3;OPCML;CA10;MYEF2;BCL11B;ARPP21;BCL11A;INSR;NTRK3;SLC4A10;SORBS2;SYT14;PPP2R3A;CORO2B;ST18;SNAP91;SGSM1;CCDC88A;NELL1;DLG2;DAB1;SLCO3A1;NBEA;ASXL3;TTC3;TCF4;ASB4;FAT4;FGF12;LRP12;UNC79                                                                              |
| ZBTB38<br>human tf<br>ARCHS4<br>coexpression | 94/299 | 1.1912051206<br>656543E-6 | BCAR3;LPGAT1;TRIO;ANKRD33B;DOCK9;EFCAB14;PTPRK;LAMC1;IKZF2;LIMD1;GALNT10;SYNE1;EPS8;AKAP13;EFR3A;AKAP11;SH3PXD2A;KIF13A;C3ORF52;SAMD12;TEAD1;CAST;MBNL1;MBNL2;ZHX3;ARHGEF12;DST;IL1R1;ANXA4;VPS13C;MYOF;VPS13D;FNDC3B;ANO6;ASH1L;KIAA1217;FRMD6;EVC;TRAF3;KCNMA1;CMPK1;ITGA8;MET;MACF1;NFAT5;ROCK2;ARHGEF28;SEL1L;TGFA;TMTC1;RRBP1;IQGAP1;LPP;TM9SF3;ATXN1;IGLV2-14;ARSJ;SNX25;MGAT5;BTLA;STK38L;SPOCK1;SNX9;HIVEP2;MAP4;STARD13;PCGF5;STAT1;NEK6;RFTN1;NEK7;SAMD4A;ERBIN;CRIM1;CYBRD1;CABLES1;LNPEP;DNAJC13;LAMB1;SYNJ2;GNG12;SMARCA2;ELL2;ZZEF1;EXT1;MYO1D;MYO1E;DPY19L1;SLMAP;FAT1;BCL2;ATP13A3;SEC24D;FBN1   |
| ZNF532<br>human tf<br>ARCHS4<br>coexpression | 94/299 | 1.1912051206<br>656543E-6 | GABRB3;DRAXIN;TENM3;HIP1;TENM4;MEGF10;CTNND2;GRIK3;ELAVL4;PSIP1;SOGA1;CELSR2;BTCD1;PTPRG;GLI2;ROBO1;IGF1R;ZNF608;CDH2;DPYSL5;TRIM2;AKT3;RBPMS2;DIP2C;LARGE1;NEO1;MAGI1;WSB1;CXADR;SNRPN;TMEM178B;DCC;CACNA2D1;RFX3;TET1;ANK2;FRMD4A;NAV2;IL17RD;ENAH;SETBP1;ADGRB3;LRRC7;ASTN1;HDAC2;CTTNBP2;TNKS;NXN;AGAP1;ILDR2;AKAP6;NREP;KALRN;NPAS3;FAM171A1;STOX2;CECR2;APELA;MAP2;ZNF704;LRIG1;NCAM1;IGF2BP3;CTNNA2;SRGAP3;CSMD2;ZNF423;EXTL3;MPDZ;WASF3;ARNT2;ZNF462;FARP1;MYEF2;WSCD1;AUTS2;NTRK3;YLPM1;PTPN13;CORO2B;DCLK1;PBX1;PTK2;TJP1;PTPRD;ZNF738;WNK2;KLHL7;DLG5;TTC3;FAT3;TCF4;FAT4;ADGRL2                      |
| ZNF536<br>human tf<br>ARCHS4<br>coexpression | 94/299 | 1.1912051206<br>656543E-6 | MYT1L;DGKB;CTNND2;PTPRO;GRIK3;ELAVL4;SLC6A1;GPHN;ROBO1;GRM3;DPYSL5;TRIM2;DNER;GDAP1L1;PSD3;PHACTR3;KIF21A;DLGAP1;TUBB2BP1;SYBU;WSB1;KCN D3;TMEM178A;LRRC49;TMOD2;RFX3;EBF3;ANK2;ANK3;DNM3;GAP43;NRG3;SETBP1;ADGRB3;LRRC7;RUFY2;HEC W1;MPPED2;AMPH;RAPGEF5;TOX;ASTN1;GRIA1;RTN1;S TXBP1;PDE1A;ATL1;BTF3L4;NRXN3;PIK3R3;AGAP1;IL DR2;AKAP6;NREP;KALRN;NOL4;HDAC9;STOX2;MAPK8;G NG2;MAP2;CLVS2;APBB2;NCAM1;CTNNA2;SRGAP3;PAK5;GRIA4;GABRA2;ATF7IP;ARNT2;ZNF462;MYEF2;AUTS2;SYT1;PCDH9;PCDH8;LSAMP;DCLK1;PBX1;ENOX1;TTLL 7;ATAT1;PTPRD;MAPK10;NELL2;CCDC88A;LRFN5;APC; KLHL7;TTC3;FAT3;TCF4;APBA2                    |
| SOX4<br>human tf<br>ARCHS4<br>coexpression   | 93/299 | 2.2686550356<br>72371E-6  | SLC44A5;ROBO2;ZNF891;CNTNAP2;DRAXIN;MYT1L;ZNF 292;CLCN3P1;PTPRO;ELAVL4;SLC35F1;GRIK2;GPHN;S RGAP2C;NHSL1;DPYSL5;LRRMT4;GDAP1L1;SUMO2;TMEM 108;ITGB8;KIF21A;SOX6;SRGAP2B;MAGI1;MAPK1IP1L;EPHA7;WSB1;CXADR;LRRC49;TCF12;ATRAX;ANK2;ENAH;TOX3;SETBP1;IFT81;LRRC7;RUFY2;AKAP9;MPPED2;Z NF234;GRIA1;CRB1;HDAC2;RTN1;CTTNBP2;ATL1;CHRN A7;BTF3L4;NRXN3;NEDD4L;PIK3R3;BAZ2B;NREP;FGD4;GNG2;HECTD2;MAP2;SNTG1;ANKRD10;SRGAP3;PAK3;J AM2;PAK5;GRIA4;RFTN2;ZNF462;CADM1;ZNF382;AUTS 2;BCL11A;SIAH3;INSR;RANBP17;CORO2B;ST18;PBX1; ATAT1;MAPK10;CCDC88A;NFIA;NBEA;APC;NFIB;ZNF73 8;KLHL7;ASXL3;TTC3;ZNF536;TCF4;SSBP2;LRP12 |

|                                               |        |                           |                                                                                                                                                                                                                                                                                                                                                                                                                                                                                                                                                                                                                       |
|-----------------------------------------------|--------|---------------------------|-----------------------------------------------------------------------------------------------------------------------------------------------------------------------------------------------------------------------------------------------------------------------------------------------------------------------------------------------------------------------------------------------------------------------------------------------------------------------------------------------------------------------------------------------------------------------------------------------------------------------|
| ZFHX3<br>human tf<br>ARCHS4<br>coexpression   | 93/299 | 2.2686550356<br>72371E-6  | RYR2;PATJ;DOCK4;TRIO;DOCK9;CELF4;KIAA1671;SOGA1;SIPAIL3;RYR3;SYNE1;RPTOR;C4ORF50;UNC80;CDH5;HERC2;RPS6KA5;HERC1;MPRIIP;ADAMTSL3;MCF2L;PSD3;GAST;ERC1;PKNOX2;GUCY1A2;VWFP1;ARHGEF12;DST;VPS13D;ABCC9;ANK3;ASH1L;URB1;SHISA9;HSPG2;KLF15;TANC2;TANC1;CLIP1;GAP43;NAV3;PEAK1;HECW2;WDPCP;WDFY3;BIRC6;RAPGEF5;PPARA;DGKI;FTO;NOTCH2;MACF1;NFAT5;KMT2C;AGAP1;CACNA1C;CACNA1E;LPP;PDZD2;KIAA1328;HECTD4;PLXNA2;GSG1L;ABL2;FLNB;NCAM1;CSMD1;ATP9B;ATP9A;ARNT2;FARP1;ANKRD30BL;NTRK3;MICAL3;NSG1;HOOK3;CDC42BPB;GRIN2B;MYO9A;HS3ST4;MEIS2;PBX1;ZZEF1;TJP1;ARHGAP32;GNAL;PDE10A;AGO3;WNK2;NEDD4;FAT3;FAT4                      |
| ZFPM2<br>human tf<br>ARCHS4<br>coexpression   | 93/299 | 2.2686550356<br>72371E-6  | SLC44A5;OSCP1;CCDC122;CNTNAP2;MYT1L;DPY19L2P2;DIRAS2;LTN1;GADL1;TMEM182;GRIK2;EFCAB6;MYLK3;GPHN;RPH3A;UNC80;SYNPR;ADAMTS3;LRRTM4;TRIM2;ADAMTSL3;ZNF407;AKT3;PSD3;DPF3;DLGAP1;NOS1;ERC1;SOX6;DIP2C;SRGAP2B;PPFIA2;POTEC;MAPK1IP1L;UNC13C;RBFOX1;KCND3;CACNA2D1;TMOD2;TTC7B;KAZN;ANK2;SHISA9;FAM126A;SYN2;CNKSR2;SETBP1;LRRC7;HECW1;KCNQ3;PLCB1;SHANK2;GRIA1;SHC4;NECAB1;TPH2;NLGN1;STXBP1;NDRG2;KALRN;MIPOL1;STOX2;GRIN2A;HECTD1;SV2B;MAP2;CLVS2;RFPL3S;OPCML;SLC14A2;SPHKAP;GABRA6;SYT1;CADM2;ST8SIA1;INSR;NTRK3;KIAA1549L;ADAM32;PDE4DIP;ATP2B2;MYO9A;SNAP91;TTLL7;FER;NFIA;NFIB;NEDD4;TTC3;SPIRE1;SCN2A;LRP12;CPEB4 |
| ZNF385D<br>human tf<br>ARCHS4<br>coexpression | 93/299 | 2.2686550356<br>72371E-6  | ROBO2;DPP10;CCDC122;ZNF891;ATP8A2;MYT1L;ANKRD36;C2ORF88;CELF4;SLC8A1;MYLK3;GRM1;RIMS2;UNC80;EPB41L4A;GRM5;GRM7;CA5A;TRIM2;ADAMTSL3;PHACTR3;DLGAP1;ANKS1B;SOX5;GARNL3;KCNH5;LRRC49;TMOD2;MAGI2;TTC7B;UBE2QL1;ANK2;ABCC9;ANK3;SHISA9;AJAP1;CNKSR2;FRMD3;DNM3;LRRC7;HECW1;ASTN2;PLCB1;ZNF397;SLC24A2;TPH2;PPM1L;KCNE4;ATL1;NTM;KALRN;CACNA1E;MIPOL1;GRIN2A;DPP6;KIAA1328;FLRT2;PGBD5;MAP2;FUT9;CHN1;CLVS2;CAMTA1;NCAM1;CSMD3;PAK3;ASIC2;MORC1;CSMD1;GABBR2;RIC3;ZNF382;SYT1;NEGR1;CADM2;NTRK3;LSAMP;SLC4A10;SYT16;ADAM32;GRIN2B;DCLK1;PBX1;SNAP91;TTLL7;CCDC88A;GFI1B;DLG2;PDE10A;PPP2R2B;GNAQ;SCN2A;ASB3                |
| AFF1<br>human tf<br>ARCHS4<br>coexpression    | 93/299 | 2.2686550356<br>72371E-6  | ITSN2;RERE;DIDO1;ATP8A1;KDM1B;DOCK9;DOCK8;CHD6;KIAA1671;EFCAB14;PTPRJ;LIMD1;SIPAIL3;YBX3;AKAP13;FYCO1;NIPBL;HERC1;ZNF407;KIF13A;LRRFIP1;ARFGEF3;CAST;MBNL1;ARHGEF12;ITGA4;RALGAP2;VPS13C;VPS13D;VPS13B;ASH1L;RUNX1;KIAA1217;BMP2K;WDFY3;BIRC6;UTRN;DOCK2;MCTP2;KDM7A;FKBP5;ANKRD17;MACF1;NFAT5;CASZ1;MTMR3;WDR26;ABHD2;KMT2C;DNAH5;PRUNE2;HTT;ITPR2;BAZ2A;IQGAP1;AMBRA1;ACACA;PCNX1;SCAF8;LARP1;HECTD1;NSD1;HECTD4;FLNB;HIVEP2;PCNT;MARK2;RANBP2;ARFGEF1;USP24;SPEN;CREBBP;LRBA;TRAPPC10;DENND4C;ERBIN;XPO7;LNPEP;MYO9B;DNAJC13;FOXN3;HIPK1;SMARCA2;FLI1;ZZEF1;MTOR;MED13L;DIAPH1;SP3;BCL2;STRN;ESYT2;CDK12           |
| ETV1<br>human tf<br>ARCHS4<br>coexpression    | 92/299 | 4.3437660445<br>467605E-6 | GABRB3;PPP1R17;HIP1;GALNT13;DOCK3;MTCL1;MEGF11;CTNND2;DIRAS2;RASGRF1;LDLRAD3;KNDC1;RORB;PCMTD2;RPH3A;SRGAP2C;TRIM9;TRIM2;MCF2L;DNER;PSD3;TNR;ITGB8;DLGAP1;SRGAP2B;MAGI1;CADPS2;RBFOX3;KCND2;KCND3;TMEM178A;DCC;SEMA6D;TCF12;TMOD2;RFX3;ANK2;SEZ6L;SYN2;MAPK8IP1;EPN2;CNKSR2;TIAM1;TOX3;ADGRB3;ADGRB1;SCG3;ASTN1;SAMD5;ADCYAP1R1;NLGN1;PHLPP1;STXBP1;BTF3L4;ADAM22;ILDR2;NDRG2;DPP6;SV2B;MAP2;SNTG1;FUT9;LRIG1;CLVS2;SPOCK1;GPR158;SLC15A5;WASF3;GRIA4;BBS2;RFTN2;ARNT2;LINGO1;PTPRN2;DTNA;MYEF2;GABRA6;WSCD1;SYT1;CADM2;ATP2B2;KLHL4;S100B;CORO2B;SNAP91;IGS                                                          |

|                                              |        |                           |                                                                                                                                                                                                                                                                                                                                                                                                                                                                                                                                                                                                                            |
|----------------------------------------------|--------|---------------------------|----------------------------------------------------------------------------------------------------------------------------------------------------------------------------------------------------------------------------------------------------------------------------------------------------------------------------------------------------------------------------------------------------------------------------------------------------------------------------------------------------------------------------------------------------------------------------------------------------------------------------|
|                                              |        |                           | <i>F11;MAPK10;APC;SMOC1;CNTN1;SPIRE1;APBA2</i>                                                                                                                                                                                                                                                                                                                                                                                                                                                                                                                                                                             |
| RFX3<br>human tf<br>ARCHS4<br>coexpression   | 92/299 | 4.3437660445<br>467605E-6 | <i>FANK1;SPAG16;OSCP1;ZNF292;ELAVL4;EFCAB6;TTC29;TRIM9;ZNF608;DACH1;CDH2;DPYSL5;ZNF606;LRRTM4;TRIM2;SNAPC3;HYDIN;KIF21A;EPHB1;CFAP44;MAGI1;EPHA4;WSB1;CXADR;ADGRV1;DCC;LRRC49;TCF12;ANK2;IL17RD;SRP9;TOX3;SETBP1;IFT81;LRRC7;ARMC3;RUFY2;CDHR3;ASTN1;CFAP61;GRIA1;DNAH3;HDAC2;TNKS;DNAH6;GREB1L;ILDR2;AKAP6;DNAH9;BAZ2B;NREP;NOL4;NPAS3;STOX2;GNG2;HECTD2;MAP2;FUT9;TMEM67;MAP6;TSPAN3;CTNNA2;CSMD3;SRGAP3;SLIT2;PAK3;ZNF462;NTRK2;DNAH10;MYEF2;AUTS2;SPAG6;CFAP70;RABL2A;VWA3B;DCLK1;ATAT1;PTPRD;TMEM232;MAPK10;NELL2;CCDC88A;RSPH1;FAM183A;APC;ZNF738;FABP7;TTC3;FAT3;C6ORF118;SSBP2;PPIL6</i>                           |
| ZNF540<br>human tf<br>ARCHS4<br>coexpression | 92/299 | 4.3437660445<br>467605E-6 | <i>PCSK2;ZNF891;ZNRFP2P2;MYT1L;DGKB;ZNF292;ELAVL4;FRG1HP;CDH8;UNC80;SCGN;DPYSL5;TRIM2;GDAP1L1;RNF17;TRAPPC11;KIF21A;RALGPS1;ANKS1B;RGS7;ZNF287;EPHA7;TANGO6;WSB1;TET1P1;LRRC49;NGDN;TMOD2;MAGI2;RFX3;SEZ6L;GABRG2;ITFG1;PJA2;ADGRB3;LRRC7;TRAPPC6B;RUFY2;HECW1;SCG5;SCG3;MAPRE2;ZNF675;CDH18;ASTN1;ZNF112;GRIA1;STX12;MAGEL2;RTN1;STOML1;STXBP1;ATL1;NRXN3;RGPD5;NREP;NYAP2;NOL4;MTMR7;RIC8B;GNG2;HECTD2;MAP2;SNTG1;SPOCK3;CTNNA2;CSMD3;SRGAP3;PAK3;GRIA4;CCDC178;PTPRN2;CADM1;ZNF382;CADM2;LSAMP;SLC4A10;SYT16;MEIS2;SGCZ;ATAT1;MAPK10;LRFN5;APC;ASXL3;TTC3;CNTN1;PARGP1;CNTN4;SCN2A;FSIP1;SSBP2</i>                      |
| ZBTB37<br>human tf<br>ARCHS4<br>coexpression | 92/299 | 4.3437660445<br>467605E-6 | <i>CCDC122;ZNF891;ANKRD36;ZNF292;DOCK8;USP33;GADL1;TMEM182;FRY;LYST;MYLK3;SYNE2;SYNE1;AKAP13;NIPBL;PTAR1;RPS6KA5;C16ORF72;HERC1;ZSCAN30;CA5A;ADAMTSL3;KYNU;LONP2;POTEC;RALGAPA1;RALGAPA2;VPS13C;VPS13D;TTC7B;VPS13B;ABCC9;ASH1L;SHISA9;ARID1B;PARP8;PHF20L1;PEAK1;AKAP9;CNKSR3;WDPCP;WDFY3;BIRC6;PIK3C3;ASTN2;UTRN;MCTP2;KDM7A;FTO;MACF1;TPH2;DDX6;NFAT5;CATSPER2;KMT2C;RGPD6;RGPD5;BAZ2B;LPP;MIPOL1;FBXL20;ATXN3;ORC4;PCNX1;KIAA1328;ANKRD36BP2;TRPM7;ATP9B;SCAI;BPTF;RABGAP1L;MBD5;ZNF382;INSR;MGA;ERBIN;ADAM32;LNPEP;ARHGAP28;HOOK3;DDHD1;PHC3;PARP15;CYLD;AGO3;KANSL1;NEDD4;DMXL2;BRWD1;PTPN4;ASB3;TNRC6B</i>          |
| PAX8<br>human tf<br>ARCHS4<br>coexpression   | 91/299 | 8.4526438552<br>22726E-6  | <i>COL18A1;SPON1;PATJ;PPP1R13B;ATP8A1;DOCK9;CPQ;KIAA1671;ZBTB20;LAMC1;SIPA1L3;SYNE2;PTPRG;SYNE1;AKAP13;DEPTOR;MPRIIP;MECOM;ENPP3;VSTM4;ADAMTS9;GTF2I;CUBN;ZHX3;ARHGEF12;RALGAPA2;ARHGEF17;COL23A1;VPS13D;ARAP2;WDR72;KIAA1217;TANC1;GOLGA8B;POR;FNDC1;COL4A3;WDFY3;BIRC6;PKHD1L1;PLA2R1;UTRN;GPRC5C;DOCK1;MET;DGKI;MATN2;FKBP5;ITGA9;YAP1;NOTCH2;MACF1;NFAT5;RBM47;SEMA3D;SDC2;ARHGEF28;GLIS3;TGFA;RRBP1;LRP2;PRDM11;RAP1GAP;THSD4;HIRA;HECTD1;FLNB;APOL1;KCNJ1;ZBTB7C;FARP1;STARD13;HOMER2;LRBA;ZBTB16;SLC12A1;ZNF804B;FAM189A2;CYBRD1;SORBS2;LAMB1;MYO9A;AIF1L;PTPRB;ARHGAP31;MYO5B;LPCAT2;FAT4;GGT3P;ATP13A3;ADGRL2</i> |
| ZMAT4<br>human tf<br>ARCHS4<br>coexpression  | 91/299 | 8.4526438552<br>22726E-6  | <i>GABRB3;DPP10;DOCK3;ATP8A1;FRMPD4;MYT1L;DGKB;CTNND2;OTUD7A;CELF4;ZBTB20;GRIK1;C4ORF50;GRM5;CDH2;PEG10;TRIM2;DNER;SUMO2;KIF21A;DLGAP1;KCNH1;GUCY1A2;POU1F1;CXADR;SNRPN;TMEM178B;TMEM178A;KCNH8;TMOD2;ANK2;PGM2L1;FOX2;PJA2;AJAP1;IFT43;ADGRB3;DOK5;SCN8A;HECW1;TNIK;DGKI;CDH18;MAGEL2;KHDRBS2;NLGN1;HDAC2;RTN1;PLPPR5;BTF3L4;RNF8;KLHL13;NREP;MTMR7;CECR2;GRIN2A;DPP6;MAP2;FUT9;CLVS2;CAMTA1;DPH6;NCAM1;STXBP6;PAK3;ATP9A;GRIA4;ARNT2;ZNF462;SYT1;PCDH9;CADM2;ATRN1;NTRK3;PCDH7;PBX3;LSAMP;KLHL1;ESRRG;DCLK1;TT</i>                                                                                                       |

|                                              |        |                           |                                                                                                                                                                                                                                                                                                                                                                                                                                                                                                                                                                                          |
|----------------------------------------------|--------|---------------------------|------------------------------------------------------------------------------------------------------------------------------------------------------------------------------------------------------------------------------------------------------------------------------------------------------------------------------------------------------------------------------------------------------------------------------------------------------------------------------------------------------------------------------------------------------------------------------------------|
|                                              |        |                           | LL7;PTPRD;IGSF11;RALYL;ZNF738;PPP2R2B;CAMK4;SCN2A;COPS8;TAF3;ADGRL2                                                                                                                                                                                                                                                                                                                                                                                                                                                                                                                      |
| KLF12<br>human tf<br>ARCHS4<br>coexpression  | 90/299 | 1.5355064310<br>228337E-5 | CYFIP2;OXNAD1;ABCD2;MAML2;DOCK8;CELF2;CEP120;RORA;LYST;ETS1;SYNE2;SYNE1;DOCK10;AKAP13;HERC1;TRIM2;SACS;UBASH3A;KIF21B;TRIM23;CD96;MBNL1;PRKCH;CNOT6L;ITGA4;CACNA2D1;VPS13C;TCF12;ARAP2;RFX3;VPS13B;ANK2;ASH1L;TC2N;IPCEF1;ZDHHC17;ZFP90;PARP8;PHF20L1;ITPKB;ARL4C;GOLGA8B;SETBP1;DPYD;ZNF780B;BIRC6;ZNF831;TNIK;UTRN;DOCK2;KDM7A;KMT2E;MACF1;DDX6;TNKS;KMT2C;NLRC5;BAZ2B;NREP;RASGRP1;CACNA1I;STOX2;PCNX1;GNG2;MAP2;NCAM1;FYN;HIVEP2;SCAI;CREBBP;BCL11B;SEMA4D;TRAPPC10;ERBIN;MYO5A;LNPEP;DCLK1;CCDC88A;CYLD;SNRK;APC;KANS1;CAMK4;TTC3;BCL2;CCSER2;TCF4;BRWD1;PTPN4;FRYL                 |
| SOX11<br>human tf<br>ARCHS4<br>coexpression  | 90/299 | 1.5355064310<br>228337E-5 | SLC44A5;DRAXIN;MYT1L;ANKRD36;ZNF292;PTPRO;ELAVL4;MSANTD4;GPHN;NHSL1;CDH2;DPYSL5;TRIM2;SNAPC3;GDAP1L1;LUC7L;KIF21A;MAPK1IP1L;EPHA4;WSB1;CXADR;DCC;LRRC49;MAGI2;ATRX;RFX3;MYT1;SRP9;ENAH;SETBP1;IFT81;LRRC7;RUFY2;AKAP9;MPPED2;ZNF675;KMT2E;GRIA1;CRB1;HDAC2;RTN1;STAU2;ATL1;NTM;BTFL3L4;NRXN3;NEDD4L;PIK3R3;AKAP6;BAZ2B;NREP;NOL4;PHF21B;FGD4;GNG2;MAP2;ZNF627;MAP6;NCAM1;CTNNA2;SRGAP3;PAK3;PAK5;CLVS1;ATF7IP;RIC3;ZNF462;MON2;MYEF2;CADM1;ZNF382;AUTS2;BCL11A;ST18;ATAT1;MAPK10;NELL2;CCDC88A;NFIA;NFIB;ZNF738;AGO1;KLHL7;ASXL3;TTC3;YPEL1;ZNF536;TCF4;SSBP2;LRP12                      |
| POU3F3<br>human tf<br>ARCHS4<br>coexpression | 90/299 | 1.5355064310<br>228337E-5 | DRAXIN;TENM4;MYT1L;CTNND2;ELAVL4;ZBTB20;CELSR2;TSPAN11;ROBO1;TRIM9;CDH4;ZNF608;CDH2;DPYSL5;PEG10;TRIM2;AKT3;DNER;GDAP1L1;KIF21A;KIF21B;ERC2;PPFIA2;TMEM178B;TMOD2;RFX3;KAZN;ANK2;FRMD4A;ANK3;IL17RD;SORCS3;MYT1;MPPED1;SETBP1;LRRC7;ADGRB1;TNIK;ASTN1;GRIA1;STAU2;AGAP1;ILDR2;NREP;KALRN;NPAS3;PHF21B;FAM171A1;STOX2;GTF2IP1;GNG2;MAP2;CDH20;FUT9;ZNF704;PLXNA2;MAP6;CAMTA1;NCAM1;CTNNA2;SRGAP3;ZNF423;PAK5;ATP9A;ARNT2;NTRK2;NDFIP1;MYEF2;WSCD1;AUTS2;NTRK3;PCDH8;GRIN2B;CORO2B;DCLK1;TTLL7;ATAT1;PTPRD;MAPK10;MAB21L3;CCDC88A;DLG2;APC;SMOC1;TTC3;ZNF536;FAT3;TCF4;RGS12;APBA2         |
| TBX20<br>human tf<br>ARCHS4<br>coexpression  | 90/299 | 1.5355064310<br>228337E-5 | FHOD3;COL18A1;RYR2;MYO1;PPP1R13B;DPY19L2P1;FHL2;LDB3;LAMC1;SIPA1L2;MYO2;SLC8A1;MYLK3;AKAP13;ARHGAP42;CDH2;KIF13A;MYO18B;DPF3;PGM5;TEAD1;ADAMTS9;PDK1;UNC45B;MLIP;MYOCD;CERS6;ARHGEF17;TPM1;MTUS2;TOM1L2;TANC1;VCAN;COL4A2;COL21A1;SLC27A6;ALPK3;MXRA7;ALPK2;TLN2;PPP1R12B;DGKI;MATN2;ITGA9;YAP1;FBN2;PRKAA2;SMPX;TMTC1;CACNA1C;LTBP1;THSD4;ABLIM1;INPP5A;MGAT5;TNNI1;CTNNA3;SLIT3;MAP4;B4GALNT3;CCDC141;PDLIM5;MPDZ;CORIN;SVIL;SPHKAP;CNTN5;NEBL;PCDH7;NEK7;EXOC6B;MICAL3;SAMD4A;FAM189A2;PDE4DIP;SORBS2;PXDNL;LAMB1;MCC;PTPN13;BMP5;TJP1;PLCXD3;BMP2;COL5A1;DLC1;SLMAP;PDE3A;STRN;TACC2 |
| ZNF292<br>human tf<br>ARCHS4<br>coexpression | 90/299 | 1.5355064310<br>228337E-5 | SLC44A5;TCERG1;CCDC122;ZNF891;ZBTB25;ANKRD36;CHD9;ELAVL4;EFCAB6;PPP1R9A;SYNE2;GRM7;ZSCAN30;PIIP5K2;TRIM2;ADAMTS13;KIF21A;ANKRD36C;WSB1;CXADR;HFM1;DCC;LRRC49;VPS13C;MAGI2;ATRX;RFX2;RFX3;VPS13B;FAM126B;ARID1B;SETBP1;IFT81;LRRC7;RUFY2;HECW1;MPPED2;WDPCP;PIK3C3;ASTN2;ANKRD36B;ZNF431;KMT2E;HDAC2;CHRNA7;KMT2C;RGPD6;RGPD5;BAZ2B;NREP;CACNA1E;MTMR7;MIPOL1;ORC4;MAPK8;GNG2;KIAA1328;MAP2;SNTG1;ANKRD36BP2;SRGAP3;CSMD2;PAK3;ATP9B;SCAI;PAK5;BPTF;RIC3;ZNF462;MBD5;MYEF2;ZNF382;ERCC6L2;ADAM32;DDHD1;CCDC1;MAB21L3;CCDC88A;AGO3;NBEA;KLHL7;NEDD4;ASXL3;TTC3                             |

|                                                  |        |                           |                                                                                                                                                                                                                                                                                                                                                                                                                                                                                                                                                                                                                                               |
|--------------------------------------------------|--------|---------------------------|-----------------------------------------------------------------------------------------------------------------------------------------------------------------------------------------------------------------------------------------------------------------------------------------------------------------------------------------------------------------------------------------------------------------------------------------------------------------------------------------------------------------------------------------------------------------------------------------------------------------------------------------------|
|                                                  |        |                           | ;TCF4;BRWD1;SSBP2;ASB3;FRYL;TNRC6B                                                                                                                                                                                                                                                                                                                                                                                                                                                                                                                                                                                                            |
| ZFP28<br>human tf<br>ARCHS4<br>coexpres<br>sion  | 90/299 | 1.5355064310<br>228337E-5 | CYFIP2;GABRB3;SPAG16;POMT2;DOCK3;PLEKHB2;FRMP<br>D4;ANKRD36;CELFB4;ZBTB20;ZNF44;HTR2A;PPP1R9A;U<br>NC80;TRIM9;DACH1;GRB14;DPYSL5;PEG10;AKT3;HYDI<br>N2;BBS9;DNM1L;TRIM23;RGS7;GUSBP1;EPHA6;RALGAP<br>A1;ABCC8;PDE4D;PRKCA;ANK2;ABCC9;SCAMP1;ARID1B<br>;FOX2;PJA2;ZFP90;CACNB2;LRRC7;RRAGD;AKAP9;MY<br>O3A;SCG5;SCG3;AMPH;PRKD1;CNTNAP5;SAMD5;STX12;<br>PPM1L;TNKS;NTM;NOL4;NALCN;SLC7A2;MTMR7;SDCBP;<br>GRIN2A;MAP2;FUT9;ZMAT4;TYW1;NCAM1;PTCHD4;CSMD<br>2;ATP9A;OPCML;PTPRN2;NTRK3;LSAMP;FAM189A2;SLC<br>4A10;MYO5A;CDC42BPA;GRIN2B;MEIS2;PBX1;PTK2;PT<br>PRD;TMEM232;FER;NBEA;APC;GSTA3;RCAN2;TTC3;BRW<br>D1;COPS8;CPEB4                    |
| HIVEP2<br>human tf<br>ARCHS4<br>coexpres<br>sion | 89/299 | 2.6349441037<br>109094E-5 | CYFIP2;ITSN2;MAML2;ATP8A1;FRMPD4;DOCK9;DOCK8;<br>RASGRF2;RASGRF1;PTPRJ;RORA;ETS1;SYNE1;DOCK10;<br>RPH3A;AKAP13;FAM102A;AKAP11;HERC1;MPRIIP;PSD3;<br>DLGAP1;MAP3K5;KCNH1;ARHGEF11;RBFox1;MBNL1;MEF<br>2C;PRKCH;PRKCB;PRKCE;VPS13C;TMOD2;VPS13D;ARAP<br>2;ANK2;ASH1L;IPCEF1;SYN2;ITPKB;PACS1;MADD;KCN<br>Q5;WDFY3;ZNF831;RAPGEF5;UTRN;DOCK2;NGEF;KDM7A<br>;MACF1;NFAT5;ADAM22;SLC1A2;NLRC5;HTT;IQGAP1;R<br>ASGRP1;KIAA0513;CACNA1I;GRIN2A;PCNX1;ABLIM1;A<br>TXN1;SV2B;HECTD4;CHN1;CREBBP;BCL11B;SEMA4P;IQ<br>SEC1;PLEKHA2;PCGF5;ERBIN;MYO5A;PDE4DIP;LNPEP;<br>MYO9B;ATP2B2;ARHGAP26;SMARCA2;GRIN2B;ZZEF1;CY<br>LD;SYNJ1;PPP2R2C;CAMK4;BCL2;STRN |
| ZHX1<br>human tf<br>ARCHS4<br>coexpres<br>sion   | 89/299 | 2.6349441037<br>109094E-5 | PCSK2;LIN54;ERO1B;ABCD3;ZFYVE9;CPQ;USP32;LAMC<br>3;POGK;RAB22A;SCGN;EFR3A;AKAP11;PPIP5K1;TRIM2<br>;RB1CC1;PSD3;ANKRD31;LONP2;BCAP29;KIF21A;DIP2<br>B;SOX6;DIP2C;SCAPER;PCMTD1;PPFIA2;MBNL2;ZHX3;<br>ARHGEF12;MUSK;DST;ARL15;LIMCH1;RALGAP1;ZNF16<br>0;VPS13D;ANK2;FNDC3A;ASH1L;ITFG1;TANC2;PJA2;R<br>ABEP1;CSDE1;AKAP9;CMPK1;SCG5;WDFY3;SCG3;ARHGE<br>F7;MICU1;ZMYND11;ZNF235;STX12;PRKAA1;ROCK2;PI<br>K3R3;ZDHHC21;SLC30A10;HACD2;NOL4;SNTG2;HECTD1<br>;FCHO2;GSE1;MAPK1;FAM83B;ATP9A;MON2;NDFIP1;AB<br>CA5;ERBIN;SYT16;RANBP9;CDC42BPA;ELL2;MEIS2;FI<br>G4;MOB1B;ARHGAP32;SYNJ1;APC;TTC3;CNTN1;CCSER2<br>;SPIRE1;CPE;STRN                   |
| PBX3<br>human tf<br>ARCHS4<br>coexpres<br>sion   | 89/299 | 2.6349441037<br>109094E-5 | DPP10;DRAXIN;TENM3;ATP8A1;TUSC3;GRIK1;GRIK2;B<br>ICD1;CDH8;PTPRG;ROBO1;DACH1;CDH2;DPYSL5;PEG10<br>;TRIM2;DNER;GDAP1L1;DIRC3;ZNF521;RALGPS1;MAGI<br>1;CXADR;TMEM178B;DCC;CACNA2D1;LRRC49;MAGI2;EB<br>F1;EBF2;EBF3;GFRA1;RGMB;MYT1;PGM2L1;FOX2;PJA<br>2;ADGRB3;NME7;LRRC7;DOK5;LMX1B;TOX;CNTNAP5;KH<br>DRBS2;HDAC2;RTN1;PLPPR5;GREB1L;PIK3R3;BAZ2B;K<br>LHL13;NREP;KALRN;TMEM163;STOX2;MAPK8;GNG2;MAP<br>2;ZMAT4;MVB12B;MAP6;NCAM1;CTNNA2;CSMD3;PAK3;P<br>AK5;ATF7IP;CA10;NDFIP1;MYEF2;ZNF382;CNTN5;AUT<br>S2;KLHL1;DCLK1;ARHGAP24;ENOX1;ATAT1;PTPRD;MAP<br>K10;RALYL;FER;KLHL7;ASXL3;TTC3;KIAA1958;SSBP2<br>;APBA2                             |
| ZEB2<br>human tf<br>ARCHS4<br>coexpres<br>sion   | 89/299 | 2.6349441037<br>109094E-5 | DOCK4;PID1;MCTP1;ANKRD36;MEGF11;DOCK8;CELFB2;A<br>NKRD20A1;FRY;BACH1;LYST;SLC8A1;FAM107B;SYNE1;<br>DOCK10;AKAP13;GRM5;HERC1;GRM7;TRIM2;TMEM108;L<br>UC7L;TRAPPC11;EMILIN2;KIF21B;GUCY1A2;MEF2C;LI<br>MCH1;DAPK1;GRID1;VPS13C;PDE4D;TMOD2;ARAP2;VPS<br>13B;ANK2;FAM126B;ZDHHC17;RUNX1;PHF20L1;DNM3;A<br>GAP9;VCAN;MPPED1;LRRC7;DPYD;MTF2;KCNQ3;RAPGEF<br>2;WDFY3;COL6A6;ECT2L;DOCK2;MACF1;RABGAP1;WDR2<br>6;CTTNBP2;KMT2C;AOAH;NR2C1;FBXL20;GNG2;MAP2;N<br>CAM1;MYEF2;NTRK3;SYT16;MYO5A;RAB27A;SYT14;FOX<br>N3;DDHD1;PPP2R3A;ATP2B1;PLXDC2;ARHGAP26;SMAR<br>C2;GRIN2B;MED13L;PTPRD;CCDC88A;PTPRE;DLG2;DAB<br>1;APC;NFIB;DMXL2;CCSER1;TCF4      |

|                                               |        |                           |                                                                                                                                                                                                                                                                                                                                                                                                                                                                                                                                                                                              |
|-----------------------------------------------|--------|---------------------------|----------------------------------------------------------------------------------------------------------------------------------------------------------------------------------------------------------------------------------------------------------------------------------------------------------------------------------------------------------------------------------------------------------------------------------------------------------------------------------------------------------------------------------------------------------------------------------------------|
| DZIP1<br>human tf<br>ARCHS4<br>coexpression   | 89/299 | 2.6349441037<br>109094E-5 | APP;SH3GL3;TENM3;TENM4;CPNE4;CTNND2;FMN2;SIPA1L2;PTPRG;ROBO1;ZNF608;CDH2;TRIM2;AKT3;PSD3;SACS;KIF21A;TEAD1;NEO1;MAGI1;GUCY1A2;TMEM178B;DST;TMOD2;ANK2;IL17RD;EML1;ZDHHC17;MAPK8IP1;ENAH;PYGO1;SETBP1;DOK5;PEAK1;CDH11;MXRA7;DOCK1;PAFAH1B1;RAI14;RABGAP1;NXN;RGPD6;ADAM22;AGAP1;ILDR2;FSTL1;EHBP1;NPAS3;FAM171A1;CTIF;STOX2;FLRT2;MAP2;STK36;ZNF704;NCAM1;CTNNA2;SRGAP3;ZNF423;GPC6;MPDZ;ATP9A;WASF3;ARNT2;FARP1;MYEF2;WSCD1;AUTS2;NTRK3;RDX;KIAA1549L;HMGA2;HSPA12A;PTPN13;CDC42BPA;MYO9A;CORO2B;DCLK1;PLEKHA8;TTLL7;PTPRD;CCDC88A;TTLL5;FER;SPIRE1;FAT3;EIF4G3;ADGRL2;TBATA                |
| RAPGEF5<br>human tf<br>ARCHS4<br>coexpression | 89/299 | 2.6349441037<br>109094E-5 | DOCK4;DOCK3;ATP8A1;FRMPD4;DOCK9;CTNND2;RASGRF2;DIRAS2;RASGRF1;OTUD7A;KNDC1;SYNE1;RPH3A;SYNPR;GRM5;AKAP11;TRIM2;MCF2L;NCS1;PSD3;DLGAP1;EDIL3;CALN1;KCNH1;CADPS2;RBFox1;MBNL2;DST;PRKE;TMOD2;MTUS1;COBL;ANK2;MYRIP;SYN2;MAPK8IP1;GABRG1;AJAP1;CNKSR2;DNM3;PITPNM3;SCN8A;WDFY3;PLCB1;NGEF;PAFAH1B1;RAPGEF4;SLC24A2;NECAB1;STXBP1;ADAM22;SLC1A2;NDRG2;PRKCZ;KALRN;NALCN;RAP1GAP;KIAA0513;GRIN2A;SV2B;EPB41L3;CHN1;SPOCK3;CLVS2;SPOCK1;MBP;GPR158;ATP9A;OPCML;ARNT2;DTNA;SYT1;CADM2;ATRNL1;KIAA1549L;MYO5A;ATP2B2;HSPA12A;SNAP91;LRP1B;ETNPPL;TTLL7;PTPRD;ARHGAP32;DLG2;SYNJ1;PPP2R2C;CNTN1;SCN2A |
| GATAD2B<br>human tf<br>ARCHS4<br>coexpression | 89/299 | 2.6349441037<br>109094E-5 | CYFIP2;RERE;SETD2;DOCK8;CELF2;LDLRAD4;MSI2;SOGA1;CMIP;SYNE2;IGF1R;AKAP13;NIPBL;AKAP11;HERC1;AKT3;UBAP2L;KIF21B;ERC1;USP49;CAMK1D;TMEM178B;PRKCB;NCOA6;SFBMT2;ANK3;ASH1L;ARID1B;TANC2;AJAP1;SFPQ;UBE2R2;SETBP1;RFX7;PACS1;MADD;FAM193A;TNIK;ARHGEF7;PAFAH1B1;KMT2E;MACF1;DDX6;NFAT5;WDR26;ANP32A;KMT2C;ANKRD11;AGAP1;HTT;BAZ2A;KALRN;KIAA1328;NSD1;HECTD4;HIVEP1;GSE1;DROSHA;TRPM7;NCAM1;HIVEP2;PAK5;MARK2;BRD4;BPTF;SPEN;CREBBP;KDM4B;AUTS2;SEMA4D;IQSEC1;TRAPPC10;FOXJ3;MICAL3;LSAMP;YLPM1;LNPEP;SMARCA2;SCAF4;MED13L;TNRC6C;DLG2;AGO3;NBEA;KANSL1;AGO2;CDK12;SSBP3;TNRC6B                  |
| CHD7<br>human tf<br>ARCHS4<br>coexpression    | 89/299 | 2.6349441037<br>109094E-5 | TCERG1;ZNF891;DRAXIN;HIP1;TENM4;ZNF292;ZFAND6;ELAVL4;PSIP1;GLI3;SYNE2;KIF15;PTPRG;ZNF608;NLSL1;DACH1;CDH2;DPYSL5;ADAMTSL3;SMARCAD1;KIF21A;SOX6;SRGAP2B;MAGI1;EPHA4;SMARCC1;WSB1;USP49;DCC;LRRC49;MAGI3;TCF12;ATRX;RFX3;TET1;IL17RD;MYT1;ENAH;TOX3;MYCL;MMP16;SETBP1;IFT81;CCDC150;ZNF431;UBE2Q2P1;CRB1;HDAC2;PPM1L;TNKS;BTF3L4;GREB1L;PIK3R3;ILDR2;BAZ2B;NREP;KALRN;PHF21B;PRTG;FGD4;STOX2;CECR2;KIAA1328;MAP2;MAP6;IGF2BP3;SRGAP3;MPDZ;BPTF;ATF7IP;ZNF462;FARP1;MYEF2;AUTS2;RANBP17;ST18;MAPK10;CCDC88A;AGO3;NFIA;KANSL1;ZNF738;AGO1;KLHL7;TTC3;YPEL1;TCF4;KIAA1958;ASB3                    |
| CHD2<br>human tf<br>ARCHS4<br>coexpression    | 89/299 | 2.6349441037<br>109094E-5 | ITSN2;KDM5A;RERE;SETD2;ZNF292;DOCK8;SMG1P2;RORA;LYST;ETS1;SYNE2;SYNE1;DOCK10;AKAP13;STK10;NIPBL;C16ORF72;HERC1;ADAMTSL3;ZNF407;LRRFIP1;MBNL1;MORC3;PRKCH;ITGA4;VPS13C;VPS13D;ARAP2;VPS13B;ASH1L;ARID1B;PARP8;GOLGA8B;NCOR1;PEAK1;FAM153A;BIRC6;UTRN;DOCK2;MCTP2;KDM7A;KMT2E;MACF1;DDX6;NFAT5;WDR26;KMT2C;RGPD6;NLRC5;RGPD5;BAZ2A;RGPD8;BAZ2B;PCNX1;BTAF1;KIAA1328;NSD1;HECTD4;HIVEP1;TRPM7;CEP192;HIVEP2;ATP9B;BPTF;LRRC37A3;RANBP2;USP24;SPEN;CREBBP;MBD5;KDM4C;LRBA;TRAPPC10;MGA;YLPM1;LNPEP;HIPK1;ARHGAP26;SMARCA2;PHC3;PARP15;ZZEF1;MED13L;CYLD;SNRK;KANSL1;DMXL2;BCL2;CDK12             |

|                                             |        |                           |                                                                                                                                                                                                                                                                                                                                                                                                                                                                                                                                                                                                                                              |
|---------------------------------------------|--------|---------------------------|----------------------------------------------------------------------------------------------------------------------------------------------------------------------------------------------------------------------------------------------------------------------------------------------------------------------------------------------------------------------------------------------------------------------------------------------------------------------------------------------------------------------------------------------------------------------------------------------------------------------------------------------|
| RGS7<br>human tf<br>ARCHS4<br>coexpression  | 89/299 | 2.6349441037<br>109094E-5 | PCSK2;DOCK3;KCNC1;FRMPD4;MYT1L;CTNND2;DIRAS2;<br>RASGRF1;KNDC1;HS6ST3;RPH3A;UNC80;SYNPR;GRM5;<br>T<br>RIM2;MCF2L;NCS1;PSD3;CKMT1B;DLGAP1;PRKACB;PPF<br>IA2;KCNH1;UNC13C;RBF0X1;RBF0X3;PRKCE;TMOD2;AN<br>K2;MYRIP;SEZ6L;SYN2;GABRG2;MAPK8IP1;AJAP1;CNK<br>SR2;DNM3;MPPED1;SCN8A;KCNA1;SCG3;PLCB1;NGEF;<br>RAPGEF4;SLC24A2;NECAB1;RTN1;STXBP1;ADAM22;SLC<br>1A2;NDRG2;PRKCZ;KALRN;NALCN;RAP1GAP;KIAA0513;<br>GRIN2A;DPP6;PGBD5;SV2B;MAP2;CHN1;SPOCK3;CLVS2<br>;CACNG3;GPR158;ATP9A;OPCML;GABBR2;ARNT2;PTPRN<br>2;NDFIP1;SYT1;CADM2;CADPS;SLC4A10;KIAA1549L;M<br>YO5A;ATP2B2;HSPA12A;CORO2B;SNAP91;DLG2;SYNJ1;<br>PPP2R2C;RCAN2;CNTN1;CPE;SCN2A |
| DACH2<br>human tf<br>ARCHS4<br>coexpression | 88/299 | 4.8131828448<br>290184E-5 | GABRB3;PCDH11Y;MYT1L;PTPRO;RASGRF1;CELF4;ELAV<br>L4;CDH8;SYNPR;C10RF127;FGF9;GRM7;DPYSL5;TRIM2<br>;KIF21A;ZNF385D;SYBU;ANKS1B;PPFIA2;EPHA6;CXAD<br>R;CACNA2D1;LRRC49;TMOD2;MAGI2;ATRX;EBF1;MTUS2<br>;SEZ6L;PGM2L1;GAP43;NAV3;NRG3;IFT81;ADGRB3;LR<br>RC7;AKAP9;SCG3;CDH18;ASTN1;ZNF112;FTO;NECAB1;<br>RTN1;NRXN3;ZNF66;NREP;NOL4;NALCN;CACNA1E;FGD4<br>;STOX2;DPP6;GNG2;MAP2;SUSD4;MAP6;CAMTA1;SUSD6<br>;NCAM1;CTNNA2;SRGAP3;PAK3;PAK5;CADM1;SYT1;PCD<br>H9;CADM2;LSAMP;SLC4A10;GRIN2B;USH2A;SNAP91;DC<br>DC1;MAPK10;NELL2;RALYL;DLG2;NBEA;PPP2R2B;ASXL<br>3;TTC3;RIMBP2;CNTN1;FAT3;GALNTL6;SCN2A;SSBP2                                      |
| FOXE1<br>human tf<br>ARCHS4<br>coexpression | 88/299 | 4.8131828448<br>290184E-5 | DOCK5;PATJ;PPP1R13B;ATP8A1;DOCK9;CPQ;GALNT18;<br>KIAA1671;LAMC1;SYNE2;SYNE1;AKAP13;MPRIP;KIF13<br>A;VSTM4;GTF2I;KRT6A;GBP6;CAST;ARHGEF12;RALGAP<br>A2;ARHGEF17;COL23A1;RIPK4;MYOF;VPS13D;ARAP2;E<br>MP1;WDR72;HSPG2;KIAA1217;TOM1L2;TANC1;GOLGA8B<br>;ATRN;POR;FNDC1;COL4A3;PKP1;BIRC6;MXRA7;PKHD1<br>L1;PLA2R1;UTRN;DOCK1;MET;DGKI;MATN2;FKBP5;ITG<br>A9;YAP1;NOTCH2;MACF1;RBM47;SEMA3D;SDC2;ARHGEF<br>28;GLIS3;NTN4;RRBP1;LRP2;RAP1GAP;THSD4;HIRA;H<br>ECTD1;CTNNA1;ABL1;FLNB;CDH26;CTNNAL1;ZBTB7C;S<br>TARD13;ZBTB16;ZNF804B;FAM189A2;CYBRD1;SORBS2;<br>HOOK3;MYO9A;LRP1B;ARHGAP31;TG;MYO5B;LPCAT2;CD<br>9;GGT3P;ATP13A3;FBN1             |
| TOX3<br>human tf<br>ARCHS4<br>coexpression  | 88/299 | 4.8131828448<br>290184E-5 | ROBO2;DRAXIN;TENM4;ELAVL4;SLC35F1;TSPAN11;SRG<br>AP2C;ZNF608;NHSL1;DACH1;CDH2;DPYSL5;TRIM2;SUM<br>O2;TMEM108;ITGB8;KIF21A;SOX6;EPHB2;SRGAP2B;MA<br>GI1;WSB1;TMEM178B;NCOA6;LRRC49;MAGI3;TCF12;MA<br>GI2;ATRX;RFX3;ANK2;NSUN6;GAREM1;CFDP1;LMX1A;S<br>ETBP1;IFT81;MPPED2;PDZRN3;ZNF234;ZNF431;CRB1;<br>CHRNA7;NEDD4L;PIK3R3;ILDR2;BAZ2B;NREP;NPAS3;F<br>GD4;ORC4;STOX2;GTF2IP1;NKAIN3;ZNR3;MAP2;SNTG<br>1;ZNF704;ZNF627;MAP6;SRGAP3;PAK3;JAM2;BPTF;RF<br>TN2;FOXB1;ZNF462;FARP1;PTPRN2;MYEF2;AUTS2;RAN<br>BP17;LSAMP;ST18;PBX1;PTPRD;IGSF11;CCDC88A;CEN<br>PE;NFIA;ZNF738;TTC3;YPEL1;FAT3;TCF4;KIAA1958;<br>BMPR1B;TNRC6B                     |
| ID4<br>human tf<br>ARCHS4<br>coexpression   | 88/299 | 4.8131828448<br>290184E-5 | SPON1;TENM4;CTNND2;GRIK4;ZBTB20;FMN2;SIPA1L2;<br>SYNE2;GRM3;TRIM9;UBL3;DACH1;CDH2;TRIM2;KIF21A<br>;EPHB1;NEO1;MAGI1;SLC15A2;ADGRV1;KCNK10;TMEM1<br>78B;KCND3;LRRC49;ATRX;RFX3;KAZN;IL17RD;SEZ6L;<br>PARD3B;PYGO1;TOX3;ANKFN1;SETBP1;IFT81;ADGRB3;<br>PARD3;LRRC9;ZNF678;DGKI;CHST3;ADCYAP1R1;MAGEL<br>2;PHLPP1;NTM;ILDR2;APCDD1;NTN1;NPAS3;STOX2;GT<br>F2IP1;MAP2;ZNF704;LRIG1;GPC5;NCAM1;KCNN3;TSPA<br>N3;SRGAP3;SLIT2;MPDZ;JAM2;ARNT2;NTRK2;MBD5;ND<br>FIP1;DTNA;MYEF2;VCAM1;AUTS2;ST8SIA1;PCDH7;FAM<br>189A2;ZBTB10;HOOK3;BMP7;DCLK1;PBX1;PTPRD;NIN;<br>TTC6;ZNF738;FABP7;SMOC1;SPIRE1;FAT3;HCG22;BRW<br>D1                               |
| THRB                                        | 87/299 | 8.5807811114              | PTPRT;DOCK3;MAST4;FRMPD4;DIRAS2;CHRM5;RASGRF1<br>;KNDC1;C12ORF42;RPH3A;UNC80;SYNPR;SLC25A48;GR                                                                                                                                                                                                                                                                                                                                                                                                                                                                                                                                               |

|                                               |        |                           |                                                                                                                                                                                                                                                                                                                                                                                                                                                                                                                                                                                                                                                                                                                   |
|-----------------------------------------------|--------|---------------------------|-------------------------------------------------------------------------------------------------------------------------------------------------------------------------------------------------------------------------------------------------------------------------------------------------------------------------------------------------------------------------------------------------------------------------------------------------------------------------------------------------------------------------------------------------------------------------------------------------------------------------------------------------------------------------------------------------------------------|
| human tf<br>ARCHS4<br>coexpression            |        | 18924E-5                  | M5; ADAMTSL3; PSD3; DLGAP1; ANKS1B; KCNH1; UNC13C; R<br>BFOX1; MEF2C; KCNH5; ARHGEF12; RBFOX3; KCND3; PRKCE<br>; TMOD2; KCTD1; ANK3; ELOVL7; SYN2; CNKSR2; DNM3; SCN<br>8A; PPARA; PLCB1; VSTM2A; NGEF; RAPGEF4; SLC24A2; ST<br>OML1; HEPACAM; STXBP1; ADAM22; SLC1A2; AKAP6; NDRG2<br>; KALRN; NALCN; ATP6AP1L; KIAA0513; GRIN2A; DPP6; RI<br>C8B; PGBD5; SV2B; CHN1; ST8SIA5; CAMTA1; GPC5; CACNG<br>3; ATP9A; OPCML; GABBR2; ARNT2; OSBPL6; SYT1; NEGR1;<br>CADM2; ATRNL1; SLC4A10; KIAA1549L; FBXL17; ATP2B2;<br>SNAP91; ETNPPL; TTC39B; TTLL7; RPGRIP1; ARHGAP32; D<br>LG2; PPP2R2C; RCAN2; RAB12; SCN2A; HCN1                                                                                               |
| DACH1<br>human tf<br>ARCHS4<br>coexpression   | 87/299 | 8.5807811114<br>18924E-5  | ROBO2; DRAXIN; TENM4; ZNF292; CTNND2; CELF4; ELAVL4<br>; PPP1R9A; TSPAN11; RIMS2; GRIP1; CDH4; ZNF608; CDH2<br>; DPYSL5; GDAP1L1; EPHB2; ZNF521; PPFIA2; KCNK10; DC<br>C; LRRC49; KCNH8; MAGI3; ATRX; EBF2; RFX3; EBF3; IL17<br>RD; MYT1; PGM2L1; TOX3; SLC9A4; GAP43; LMX1A; SETBP1<br>; AKAP9; HECW1; PRR16; LMX1B; CNTNAP5; PPM1L; CHRNA7<br>; TSHZ2; GREB1L; BAZ2B; NREP; KALRN; TMEM163; NPAS3<br>; PHF21B; STOX2; GTF2IP1; PDCD6IPP2; MAP2; MAP6; NCAM<br>1; CTNNA2; SRGAP3; PAK3; ZNF423; LRRC4C; JAM2; CLVS1<br>; ZNF462; PTPRN2; MYEF2; ZNF382; ST8SIA1; CADPS; PBX<br>3; HOOK3; MEIS2; ST18; PBX1; PTPRD; MAPK10; CCDC88A;<br>ZNF618; ZNF738; AGO1; ASXL3; TTC3; KIAA1958; SSBP3;<br>VSX1; LHX9         |
| ZKSCAN2<br>human tf<br>ARCHS4<br>coexpression | 87/299 | 8.5807811114<br>18924E-5  | TENM4; ZFYVE9; ZBTB21; ELAVL4; HNRNP; PSIP1; UBE3A<br>; KIF11; BRCA2; BICD1; TXNDC16; GLI3; ZCCHC14; PTPRG<br>; ROBO1; ZNF608; CDH2; DPYSL5; ZNF606; ZMYM4; TRIM2;<br>AKT3; DNER; CHAMP1; SACS; SMARCAD1; KIF21A; NEO1; MA<br>GI1; SMARCC1; SUPT16H; WSB1; CSNK2A1; DCC; CACNA2D1<br>; RFX3; RGM; NBPF1; MSH6; SETBP1; ADGRB3; DOK5; MPPE<br>D2; ZNF678; ST6GALNAC3; WDR25; HDAC2; GREB1L; PIK3R<br>3; AGAP1; NREP; EHBP1; PHF21B; STOX2; MAP2; FUT9; ZNF<br>704; CLVS2; DROSHA; NCAM1; RPRD1A; SRGAP3; MPDZ; S10<br>OPBP; VAT1L; BPTF; ZNF462; FARP1; MYEF2; WSCD1; AUTS<br>2; ERCC6L2; YLPM1; ZBTB10; PUM1; BTBD10; PBX1; SMAR<br>C4; PLEKHA8; ATAT1; PTPRD; CCDC88A; ZNF738; FAT3; UB<br>AP1L; FAT4; ADGRL2    |
| BNC2<br>human tf<br>ARCHS4<br>coexpression    | 87/299 | 8.5807811114<br>18924E-5  | NRP1; PTPRQ; COL14A1; CHRM5; EFCAB6; GXYLT2; LAMC1;<br>C12ORF42; ANTXR1; PTPRG; EPS8; ADAMTSL1; ADAMTS5; T<br>UBB6; ARHGAP42; ADAMTS2; SGCD; HMCN2; PHACTR2; VSTM<br>4; TEAD1; ZNF124; PRKG1; ADAMTS6; POSTN; MYOCD; MUSK<br>; DST; MYOF; FNDC3B; ARID5B; NAV2; EML1; FAM126A; TBC<br>1D1; FRMD6; ELF2; EVC; HEATR5A; NAV3; CRISPLD2; PEAK<br>1; CDH11; CDH13; ALPK2; TLN2; PPP1R12B; DOCK1; VCL; R<br>AI14; RBMS3; MACF1; SAR1A; TWIST1; FSTL1; LPP; LTBP1<br>; FBLN5; GLIS1; CALD1; ARSJ; PDGFC; RNF217; CHSY3; PD<br>LIM5; STARD13; EYA4; CRIM1; CYBRD1; ARHGAP28; LAMB1<br>; GNG12; FBXO32; CDC42BPA; DAZL; TJP1; TBX15; COL5A1<br>; DLC1; SLMAP; SSPN; ITGBL1; SPATS2L; SNAI2; FBXL7; F<br>BN1; SNTB2        |
| SCAPER<br>human tf<br>ARCHS4<br>coexpression  | 87/299 | 8.5807811114<br>18924E-5  | PCSK2; ROBO2; DPP10; ERO1B; ZNF891; MYT1L; ANKRD36;<br>CHD9; ZNF292; FRG1HP; EFCAB6; PPP1R9A; LCLAT1; RIMS<br>2; UNC80; DSTYK; EPB41L4A; GRM7; ZSCAN30; LRRTM4; AD<br>AMTSL3; KIF21A; ZNF568; ANKS1B; RBM6; ANKRD36C; USP<br>49; TMEM178B; SLX4IP; MAGI2; ATRX; ANK2; OPRM1; SEZ6<br>L; ARID1B; DNM3; LRRC7; RUFY2; AKAP9; SCG5; SCG3; AST<br>N2; ANKRD36B; SDCCAG8; KMT2E; TPH2; LUZP2; PCDH15; R<br>GPD6; ADAM22; TULP4; RGPD5; ILDR2; BAZ2B; MTMR7; MIP<br>OL1; AK9; SNTG2; TTR; MAP2; SNTG1; ZNF704; HSD17B2; A<br>NKRD20A5P; ANKRD36BP2; NCAM1; SRGAP3; PAK3; CORIN;<br>BPTF; RIC3; ZNF382; ZBTB10; DCDC1; TTLL7; MAPK10; CC<br>DC88A; FER; NBEA; TMEM236; ASXL3; TTC3; TCF4; CNTN4;<br>PTPN4; ASB3; CCDC171 |
| RREB1<br>human tf                             | 86/299 | 1.5252159931<br>210862E-4 | ITSN2; DIDO1; PATJ; DOCK8; KIAA1671; LIMD1; SIPA1L3<br>; ETS2; CABIN1; RPTOR; AKAP13; ZFYVE26; HERC2; HERC1<br>; ZNF407; KYNU; MYB; LRRFIP1; PGPEP1; MAP3K5; NUP214                                                                                                                                                                                                                                                                                                                                                                                                                                                                                                                                               |



|                                             |        |                           |                                                                                                                                                                                                                                                                                                                                                                                                                                                                                                                                                                |
|---------------------------------------------|--------|---------------------------|----------------------------------------------------------------------------------------------------------------------------------------------------------------------------------------------------------------------------------------------------------------------------------------------------------------------------------------------------------------------------------------------------------------------------------------------------------------------------------------------------------------------------------------------------------------|
| ARCHS4<br>coexpression                      |        |                           | ;VAV3;MBNL1;ITGA4;SFMBT2;RALGAPA2;VPS13C;VPS13D;FNDC3B;GOLGA8J;VPS13B;ASH1L;URB1;ARID1B;RUNX1;ETV6;NCOR1;BMP2K;WDPCP;BIRC6;PPARA;UTRN;DOCK2;WDFY4;MACF1;NFAT5;CASZ1;RBM47;CTDP1;KMT2C;HTT;ITPR2;BAZ2A;RRBP1;LPP;PCNX1;KIAA1328;HECTD1;CUX1;NSD1;TRPM7;CEP192;PCNT;ATP9B;MDN1;RANBP2;USP24;SPEN;CREBBP;LRBA;TRAPPC10;MGA;LNPEP;MYO9B;HIPK1;SMARCA2;PHC3;PARP15;ZZEF1;MED13L;DIAPH1;AGO2;BCL2;ESYT2;CDK12;AVL9                                                                                                                                                   |
| TCF12<br>human tf<br>ARCHS4<br>coexpression | 86/299 | 1.5252159931<br>210862E-4 | MAML2;MEGF10;LDLRAD3;SLC35F1;TSPAN11;KIF15;ROBO1;SRGAP2C;TRIM9;CDH2;SACS;TNR;SMARCA11;ITGB8;SOX6;ZNF521;SRGAP2B;GTF2I;MAGI1;KLF12;WSB1;ADGRV1;DST;DCC;SEMA6D;RFX3;ANK2;RGMB;MOB3B;ENAH;TOX3;ASPM;ZEB1;SETBP1;IFT81;ADGRB3;TOX;ZNF112;CREB5;CRB1;ADCYAP1R1;HDAC2;STXBP4;TNKS;BTAF3L4;PIK3R3;ILDR2;BAZ2B;KLHL13;NREP;NPAS3;STOX2;NKAIN3;HECTD2;MAP2;SNTG1;ZNF704;LRIG1;APBB2;TSPAN3;SRGAP3;MPDZ;JAM2;SLC15A5;GRIA4;BBS2;RFTN2;ATF7IP;NTRK2;MYEF2;WSCD1;RANBP17;PUM1;CORO2B;ST18;PTPRD;IGSF11;MAPK10;CCDC88A;APC;FABP7;SMOC1;FAT3;TCF4;KIAA1958;FRYL              |
| ZFHX4<br>human tf<br>ARCHS4<br>coexpression | 86/299 | 1.5252159931<br>210862E-4 | ROBO2;DRAXIN;PTPRO;CELF4;ELAVL4;SLC35F1;GRIK2;PPP1R9A;ZNF608;DACH1;CDH2;DPYSL5;DNER;GDAP1L1;SUMO2;KIF21A;ZNF521;ANKS1B;GARNL3;PPFIA2;KIIRREL3;MAGI1;EPHA4;WSB1;CXADR;TMEM178B;DCC;LRRCA49;KCNH8;MAGI2;ATRX;EBF1;RFX3;ANK2;FRMD4A;ANK3;IL17RD;MYT1;PGM2L1;FOXP2;TOX3;GAP43;SETBP1;IFT81;AKAP9;AMPH;ZNF397;CHRNA7;PLPPR5;GREB1L;TPTE2P2;BAZ2B;NREP;EFNA5;PHF21B;FGD4;STOX2;GTF2IP1;MAP2;MAP6;NCAM1;CTNNA2;SRGAP3;PAK3;ZNF423;SCAI;LINGO2;ZNF462;LINGO1;MYEF2;AUTS2;NEGR1;ST8SIA1;NTRK3;PBX3;LSAMP;PBX1;ATAT1;MAPK10;CCDC88A;AGO3;PPP2R2B;TTC3;FAT3;KIAA1958;LHX9 |
| MYSM1<br>human tf<br>ARCHS4<br>coexpression | 86/299 | 1.5252159931<br>210862E-4 | ITSN2;TCERG1;DIDO1;SETD2;LPGAT1;SMG1P2;LTN1;HNRNPU;RORA;SYNE2;AKAP13;NIPBL;PTAR1;C16ORF72;HERC1;ZMYM4;JARID2;KDM6A;MBNL1;SMARCC1;USP7;RALGAP1;VPS13C;VPS13D;ARAP2;TET1;VPS13B;ASH1L;TC2N;ARID1B;PARP8;MSH6;GOLGA8B;SFPQ;FAR1;WDFY3;BIRC6;UTRN;ANAPC1;KDM7A;MACF1;DDX6;NFAT5;WDR26;ROCK1;KMT2C;IREB2;BAZ2A;IQGAP1;LPP;PCNX1;SCAF8;LARP1;BTAF1;HECTD1;NSD1;HECTD4;TRPM7;MDN1;BPTF;RANBP2;ARFGEF1;USP24;SPEN;SLC16A1;KDM4C;LRBA;TRAPPC10;MGA;ERBIN;LNPEP;PHC3;SCAF4;MTOR;MED13L;TJP1;MLLT10;KANSL1;AGO2;SERBP1;DMXL2;SP3;STRN;PKN2;CDK12;BRWD1                    |
| MEF2C<br>human tf<br>ARCHS4<br>coexpression | 85/299 | 2.4801055876<br>356824E-4 | MYOM1;MYLK2;ATP8A1;MYT1L;CELF2;LDB3;SLC6A1;JPH1;LRRC2;MYOM2;SLC8A1;CRKL;GRM5;AKAP11;SGCD;HERC1;PPP2R5E;MB;TRIM2;PEBP4;MYO18B;DLGAP1;PRKACB;SGCG;GUCY1A2;UNC45B;RBFox1;DSCAM;PRKCB;CANA2D1;PRKCE;TMOD2;ANK2;TRDN;DNM3;MMP16;MPPED1;MYL1;LRRC7;SCN8A;ALPK3;KCNQ5;DGKI;PAFAH1B1;PRKAA2;SMPX;PPM1L;ADAM22;TRAK1;KALRN;GRIN2A;SV2B;FUT9;CHN1;NRAP;SYNDIG1;TNNI1;XIRP2;ZNF106;CTNNA3;NCAM1;HIVEP2;ATP9A;OPCML;SVIL;SYT1;CADM2;AGL;SYT16;KIAA1549L;MYO5A;PDE4DIP;ATP2B2;GRIN2B;DCLK1;SNAP91;TTLL7;PTPRD;DLG2;AGBL1;APC;TCF4;SCN2A;ASB2;FGF12                          |
| PGR<br>human tf<br>ARCHS4<br>coexpression   | 85/299 | 2.4801055876<br>356824E-4 | PCSK2;ERO1B;PATJ;ICA1;ZBTB20;ECE1;RORB;SERPIN A6;AFF3;IGF1R;POTEKP;CDH5;SCGN;EFEMP1;TRPS1;PP6R3;TMED3;SLC39A6;LONP2;PLCE1;PAMR1;ADAMTS9;ARFGEF3;VAV3;GUCY1A2;VWFP1;ARHGEF12;DST;RALGAPA1;ZBTB38;VPS13C;MYOF;MAGI2;VPS13B;TBC1D9;HSPG2;PRLR;CACNB2;ALDH1A2;SCG5;SCG3;PPP1R12B;RIN2;FREM1;DOCK1;MACF1;SEMA3C;KMT2C;PRICKLE2;LRP2;FAM214A;LPP;SLC7A2;THSD4;ERMP1;TTR;ZNF704;GSE1;FLNB;AKAIN1;ARFGEF1;STARD13;ABCA5;ANKRD                                                                                                                                          |

|                                              |        |                           |                                                                                                                                                                                                                                                                                                                                                                                                                                                                                                                                                                     |
|----------------------------------------------|--------|---------------------------|---------------------------------------------------------------------------------------------------------------------------------------------------------------------------------------------------------------------------------------------------------------------------------------------------------------------------------------------------------------------------------------------------------------------------------------------------------------------------------------------------------------------------------------------------------------------|
|                                              |        |                           | 30A;LRBA;GREB1;LAMB1;TDRD5;CDC42BPA;ELL2;ESR1;MPP7;MED13L;MOB1B;SDK1;PLCXD3;TSPAN13;TMEM236;DLG5;MYO5C;VPS41;NEK10;CPE;CNTN4;SEC24D                                                                                                                                                                                                                                                                                                                                                                                                                                 |
| HIVEP1<br>human tf<br>ARCHS4<br>coexpression | 85/299 | 2.4801055876<br>356824E-4 | ITSN2;UHRF1BP1L;ANKRD33B;PPP1R13B;MAML2;KDM1B;IKZF2;BACH1;DOCK10;AKAP13;ZFYVE26;NIPBL;RPS6KA5;C16ORF72;HERC1;ADAMTSL3;ZNF407;KYNU;STPG2;KSR1;NCOA6;SFMBT2;VPS13C;VPS13D;FNDC3B;ARAP2;VPS13B;ASH1L;ARID1B;TRAF3;PEAK1;WDPCP;ZNF780B;WDFY3;BIRC6;UTRN;DOCK2;WDFY4;KDM7A;MACF1;DDX6;NFAT5;MTMR3;WDR26;KMT2C;ITPR2;BAZ2A;IQGAP1;AMBRA1;PCNX1;SCAF8;BTAF1;ATXN1;KIAA1328;NSD1;NLRP4;BTLA;TRPM7;SUSD6;HIVEP2;ATP9B;LYN;RANBP2;USP24;SPEN;CREBBP;PLEKHA2;LRBA;TRAPPC10;MGA;GPR55;LNPEP;DNAJC13;DDHD1;SMARCA2;PARP15;GATAD2B;ZZEF1;MED13L;CYLD;NLRP13;AGO3;DMXL2;BCL2;CDK12 |
| ZNF25<br>human tf<br>ARCHS4<br>coexpression  | 85/299 | 2.4801055876<br>356824E-4 | GABRB1;ATP8A1;MYT1L;CTNND2;DIRAS2;ELAVL4;TRIM9;DPYSL5;TRIM2;DNER;PSD3;DLGAP1;PRKACB;RALGPS1;SYBU;PPFIA2;RBFox1;WSB1;TMEM178B;TMEM178A;CACNA2D1;TMOD2;ANK2;FRMD4B;SYN2;GABRG2;PGM2L1;PJA2;DNM3;ADGRB3;RUFY2;ULK2;AMPH;ZMYND11;VSTM2A;ASTN1;GRIA1;RTN1;STXBP1;ATL1;ADAM22;NRXN3;AKAP6;NREP;PRKCZ;KALRN;NALCN;DPP6;GNG2;SV2B;MAP2;CDH20;FUT9;SMIM11B;CHN1;CLVS2;NCAM1;CTNNA2;PAK3;ATP9A;OPCML;GABRA2;ARNT2;NDFIP1;SYT1;CADM2;PBX3;SLC4A10;SYT16;ATP2B2;DCLK1;SNAP91;TTLL7;ATAT1;MAPK10;DLG2;APC;PPP2R2B;RCAN2;TTC3;YPEL1;CNTN1;SCN2A;SSBP2;APBA2                       |
| CAMTA1<br>human tf<br>ARCHS4<br>coexpression | 85/299 | 2.4801055876<br>356824E-4 | GABRB3;PTPRT;ATP8A2;DOCK3;MYT1L;CTNND2;DIRAS2;CELFA4;ELAVL4;RPH3A;RIMS1;GRM5;TRIM2;PSD3;KIF21A;DLGAP1;ZNF385D;ANKS1B;PPFIA2;RBFox1;TMEM178B;TMEM178A;TMOD2;KAZN;UBE2QL1;ANK2;ANK3;SYN2;GABRG2;PGM2L1;AJAP1;CNKSR2;DNM3;GAP43;SCN8A;HECW1;NOS1AP;ASTN1;SLC24A2;RTN1;STXBP1;ATL1;NTM;ADAM22;NRXN3;KALRN;STOX2;GRIN2A;DPP6;PGBD5;SV2B;MAP2;FUT9;CHN1;CLVS2;MAP6;NCAM1;CTNNA2;SRGAP3;PAK3;PAK5;ATP9A;WASF3;OPCML;GABBR2;ARNT2;SYT1;CADM2;NTRK3;LSAMP;KIAA1549L;ATP2B2;HSPA12A;DCLK1;PBX1;SNAP91;TTLL7;PTPRD;MAPK10;RALYL;DLG2;PPP2R2C;PPP2R2B;RCAN2;SCN2A               |
| ZBTB41<br>human tf<br>ARCHS4<br>coexpression | 85/299 | 2.4801055876<br>356824E-4 | PCSK2;ROBO2;ERO1B;TUSC3;ZNF292;PPP1R9A;LCLAT1;PCMTD2;PPP1CB;TRIM9;SCGN;ZSCAN30;TRIM2;PPP6R3;LONP2;ARFGEF3;PCMTD1;TTC37;WSB1;CXADR;DST;LIMCH1;RALGAP1;CACNA2D1;SLC2A13;LRRC49;VPS13C;RFX3;ANK2;FNDC3A;SEZ6L;SRP9;PJA2;CACNB2;MMP16;MYO3A;PIGK;SCG3;RIN2;SAMD5;INO80D;FICD;SAR1A;STXBP4;TNKS;BTF3L4;TULP4;UBR1;NOL4;NALCN;NR2C1;TTR;MAP2;TTC21B;SYNDIG1;PAK3;EVI5;MON2;PTPRN2;NDFIP1;ABCA5;PNPLA8;CADPS;SYT16;CDC42BPA;ELL2;OXR1;ST18;MOB1B;MAPK10;ITCH;CNOT7;NBEA;APC;ASXL3;TTC3;VPS41;CNTN1;CPE;CNTN4;SCN2A;BRWD1;PTPN4;LRP12;CPEB4                                 |
| ZNF248<br>human tf<br>ARCHS4<br>coexpression | 85/299 | 2.4801055876<br>356824E-4 | ATF2;MYT1L;ZNF292;PTPRO;ELAVL4;UBE3A;GRM3;DPYSL5;TRIM2;AKT3;DNER;GDAP1L1;HMCN2;KIF21A;RALGPS1;ANKS1B;PPFIA2;EPHA4;PRMT8;MYOCD;WSB1;LRRC49;TMOD2;OPRM1;SEZ6L;PJA2;SETBP1;ADGRB3;LRRC7;RUFY2;PPP1R12B;MAPRE2;ANKRD36B;CAMK1G;ASTN1;ZNF112;GRIA1;KHDRBS2;RTN1;TNKS;STXBP1;NRXN3;NEED4L;PIK3R3;AKAP6;CACNA1C;NREP;NYAP2;CACNA1E;LPP;TMEM25;STOX2;MAPK8;GNG2;MAP2;CLVS2;MAP6;NCAM1;CTNNA2;SRGAP3;PAK3;GRIA4;GABRA2;CADM1;SYT1;LSAMP;DCLK1;PBX1;ENOX1;TTLL7;ATAT1;PTPRD;MAPK10;CCDC88A;DLG2;APC;KLHL7;SLMAP;TTC3;UBAP1L;SCN2A;KIAA1958;BRWD1;SSBP2;APBA2                  |
| TUB                                          | 85/299 | 2.4801055876              | GABRB3;APP;CNTNAP2;GALNT13;ATP8A2;DOCK3;MYT1L;CTNND2;DIRAS2;KNDC1;RPH3A;TRIM9;GRM5;DPYSL5;                                                                                                                                                                                                                                                                                                                                                                                                                                                                          |

|                                               |        |                           |                                                                                                                                                                                                                                                                                                                                                                                                                                                                                                                                                                                              |
|-----------------------------------------------|--------|---------------------------|----------------------------------------------------------------------------------------------------------------------------------------------------------------------------------------------------------------------------------------------------------------------------------------------------------------------------------------------------------------------------------------------------------------------------------------------------------------------------------------------------------------------------------------------------------------------------------------------|
| human tf<br>ARCHS4<br>coexpression            |        | 356824E-4                 | TRIM2;MCF2L;AKT3;NCS1;PSD3;TNR;KIF21A;DLGAP1;PPFIA2;CXADR;TMEM178B;TMEM178A;TMOD2;KAZN;ANK2;FAM219A;SEZ6L;SYN2;MAPK8IP1;LRRC7;SCN8A;SHANK2;ASTN1;PAFAH1B1;ADCYAP1R1;RTN1;CTTNBP2;TNKS;STXBP1;NTM;ADAM22;AGAP1;NREP;KALRN;NOL4;CTIF;STOX2;SV2B;MAP2;CHN1;CLVS2;CAMTA1;NCAM1;CTNNA2;ATP9A;WASF3;OPCML;ARNT2;NDFIP1;MYEF2;SYT1;CADM2;NTRK3;LSAMP;KIAA1549L;ATP2B2;CORO2B;DCLK1;SNAP91;PTPRD;MAPK10;DLG2;NBEA;APC;PPP2R2C;PPP2R2B;RCAN2;TTC3;CNTN1;SCN2A;APBA2                                                                                                                                   |
| ZNF804A<br>human tf<br>ARCHS4<br>coexpression | 85/299 | 2.4801055876<br>356824E-4 | ROBO2;DRAXIN;PPP1R17;TENM4;MYT1L;ANKRD36;CHD9;CTNND2;CELF2;PTPRO;ELAVL4;CDH9;CMIP;RPH3A;CDH4;GRM7;DPYSL5;ZSCAN30;TRIM2;DNER;DLGAP1;ZNF385D;PRKACB;ZNF521;PKNOX2;ANKS1B;CALN1;SOX5;PPFIA2;TRPC5;ST6GAL2;KCNH5;TMEM178B;DCC;CACNA2D1;LRRC49;TMOD2;ANK2;SORCS1;ANK3;UNC5D;GFRA2;ZDHHC17;TIAM2;LRRC7;IL1RAPL2;CDC42EP3;IL1RAPL1;NLGN1;AKAP6;NREP;KALRN;NKAIN2;NEU3;STOX2;GRK3;MAPK8;SAMM50;MAP2;STK36;FUT9;PLXNA2;CLVS2;ZSWIM6;NCAM1;CTNNA2;SRGAP3;PAK5;CLVS1;NTRK3;GRIN2B;DCLK1;SNAP91;PTPRD;NELL2;CCDC88A;FER;DLG2;NFIA;APC;PPP2R2B;COL5A3;TTC3;FAT4;LRP12                                     |
| CHD6<br>human tf<br>ARCHS4<br>coexpression    | 85/299 | 2.4801055876<br>356824E-4 | RERE;DIDO1;PATJ;TRIO;ZMYND8;CISD1;MSI2;SOGA1;SIPA1L3;SYNE2;IGF1R;SYNE1;HERC2;ZNF608;C16ORF72;HERC1;MPRIP;FBXO3;DIP2A;ARFGEF3;RPS12;GTF2I;ARHGEF12;RALGAP2;VPS13C;VPS13D;VPS13B;ASH1L;ARID1B;NAALADL2;INIP;KIAA1217;ZEB1;PEAK1;AKAP9;WDFY3;BIRC6;ARHGEF7;UTRN;SFI1;MATN2;ANKRD17;MACF1;DDX6;NFAT5;CASZ1;CCDC186;UHRF2;KMT2C;DNAH5;PRUNE2;HTT;KALRN;ACACA;LARP1;KIAA1328;HECTD1;ZNF704;NSD1;HECTD4;STK38;GSE1;HS1BP3;FLNB;PCNT;MARK2;BPTF;SPEN;ZNF462;CREBBP;GLYATL2;LRBA;MGA;GREB1;YLP1;ZBTB10;SLC52A1;MED13L;TJP1;ARHGAP32;PDP2;KANS1;WNK2;CDK12;BRWD1                                       |
| FMNL2<br>human tf<br>ARCHS4<br>coexpression   | 85/299 | 2.4801055876<br>356824E-4 | APP;DOCK4;DOCK3;ATP8A1;MEGF10;CTNND2;DIRAS2;KND1;SOGA1;CELSR2;TRIM9;SPRED1;AKAP11;MPRIP;TRIM2;MCF2L;NCS1;PSD3;TNR;DLGAP1;DIP2B;EDIL3;KCNH1;RBF1;DST;TMOD2;MTUS1;KAZN;ANK2;FAM219A;SYN2;MAPK8IP1;GABRG1;DNM3;ATRN;SCN8A;WDFY3;TLN2;RAPGEF5;NGEF;ASTN1;PAFAH1B1;RAPGEF4;SLC24A2;PDE1C;STXBP1;ADAM22;SLC1A2;AGAP1;NDRG2;FAM171A1;CTIF;SV2B;CHN1;SPOCK3;CLVS2;SPOCK1;MBP;NCAM1;MAP4;GPR158;ATP9A;WASF3;MAP4K4;OPCML;ARNT2;DTNA;SYT1;CADM2;EXOC6B;KIAA1549L;MYO5A;ATP2B2;CDC42BPB;HSPA12A;S100B;CORO2B;SNAP91;ETNPPL;TTL7;TJP1;PTPRD;DLG2;PPP2R2C;SCN2A                                           |
| ZC3H6<br>human tf<br>ARCHS4<br>coexpression   | 85/299 | 2.4801055876<br>356824E-4 | CCDC122;ZNF891;CRYBB2P1;ZBTB25;PCDH11Y;MYT1L;ANKRD36;DPY19L2P2;GADL1;ZBTB20;TMEM182;EFCAB6;MYLK3;RIMS2;UNC80;EPB41L4A;CCDC91;RPS6KA5;HERC1;ZSCAN30;CA5A;ADAMTSL3;EFCAB2;MACROD2;NOS1;ANKS1B;PCMTD1;POTEC;USP8;ANKRD36C;MAGI2;TTC7B;VPS13B;ANK3;FAM126B;SHISA9;ARID1B;SPATA17;NCO1;LRRC7;PEAK1;CATSPERG;AKAP9;CNKSR3;WDPCP;ASTN2;ANKRD36B;SDCCAG8;FTO;TPH2;KCNE4;RGPD5;BAZ2B;MIPOL1;STK3;FGD4;ORC4;DPP6;KIAA1328;ANKRD36BP2;AP4S1;SRGAP3;ATP9B;SCAI;LRRC37A3;MBD5;SLC14A2;ZNF382;NTRK3;ADAM32;ARHGAP28;HOOK3;MYO9A;DCDC1;TTC39B;TTL7;MAB21L3;MFSD14C;AGO3;TMM116;NEDD4;TTC3;BRWD1;ASB3;TNRC6B |
| TEAD1<br>human tf<br>ARCHS4<br>coexpression   | 84/299 | 4.2583582371<br>160024E-4 | BCAR3;TRIO;TENM3;MAST2;PTPRK;ANTXR1;LOXL2;FYCO1;TUBB6;SGCD;MPRIP;SH3PXD2A;KIF13A;MYO18B;SACS;PRKG1;ARHGEF12;DST;ARHGEF17;MYOF;FNDC3B;AFAP1;ANO6;NAV2;FRMD6;EVC;COL4A2;CDH11;ALPK3;MXRA7;ALPK2;DOCK1;MET;VCL;CHST3;RAI14;YAP1;NOTCH2;SMPX;SEMA3C;ROCK2;NXN;NTN4;TMTC1;FSTL1;LTBP1;HECTD1;CALD1;ARSJ;NRAP;CTNNA1;ABL1;TNNI1;X                                                                                                                                                                                                                                                                  |

|                                               |        |                           |                                                                                                                                                                                                                                                                                                                                                                                                                                                                                                                                                                            |
|-----------------------------------------------|--------|---------------------------|----------------------------------------------------------------------------------------------------------------------------------------------------------------------------------------------------------------------------------------------------------------------------------------------------------------------------------------------------------------------------------------------------------------------------------------------------------------------------------------------------------------------------------------------------------------------------|
|                                               |        |                           | IRP2;ZNF106;FLNB;MAP4;PDLIM5;MPDZ;CTNNA1;SVIL;GALNT2;NEK7;EYA4;SAMD4A;CRIM1;LAMB1;AP2B1;CDC42BPB;GNG12;FBXO32;KTN1;EXT1;TJP1;EXT2;ANLN;SMTN;DPY19L1;COL5A1;DLC1;DLG5;FAT1;SNAI2;FBN1                                                                                                                                                                                                                                                                                                                                                                                       |
| ZNF300<br>human tf<br>ARCHS4<br>coexpression  | 84/299 | 4.2583582371<br>160024E-4 | SLC44A5;ATF2;DRAXIN;USP33;PTPRO;ELAVL4;GRIK2;TXNDC16;CDH8;TPGS2;ROBO1;GRIP1;NHSL1;CDH2;GRM7;DPYSL5;ZNF606;PPIP5K2;TRIM2;GDAP1L1;SUMO2;SPIN1;PHACTR3;SMARCA1;KIF21A;TUBB2BP1;EPHB1;PPFIA2;WSB1;CXADR;ARL15;LRRC49;TCF12;MAGI2;ATRX;RFX3;TET1;ZNF271P;SRP9;ITFG1;PGM2L1;SETBP1;IFT81;LRRC7;RUFY2;AKAP9;PDZRN4;KMT2E;GRIA1;HDAC2;RTN1;STAU2;BTF3L4;NRXN3;PIK3R3;BAZ2B;NREP;NOL4;STOX2;MAPK8;GNG2;HECTD2;MAP2;ZNF627;NCAM1;CTNNA2;PAK5;MYEF2;CADM1;ZNF804B;PBX3;LHFPL3;ATAT1;PTPRD;MAPK10;CCDC88A;RALYL;APC;ZNF738;KLHL7;TTC3;CCSER1;TCF4;SSBP2                                |
| ZNF33A<br>human tf<br>ARCHS4<br>coexpression  | 84/299 | 4.2583582371<br>160024E-4 | SPAG16;ZNF891;PATJ;UHRF1BP1L;ANKRD36;ZNF292;USP33;ELAVL4;UBE3A;TMEM260;RORB;PPP1R9A;BICD1;SYNE2;RIMS2;PPIP5K2;LRRTM4;ADAMTSL3;DNER;GDAP1L1;SCAPER;BBS4;ANKRD36C;CXADR;RALGAPA1;DCC;LRRC49;RALGAPA2;KCNH8;VPS13C;ATRX;VPS13B;ZNF271P;ANK3;ZDHHC17;ARID1B;PGM2L1;ZFP90;PARP8;AKAP9;SCG5;ZNF675;ANKRD36B;KDM7A;ZNF431;SAMD5;KMT2E;HDAC2;TNKS;KMT2C;TULP4;BAZ2B;NREP;NOL4;GLB1L3;MTMR7;GTF2IP1;MAP6;ANKRD36BP2;PAK3;EVI5;BPTF;CLVS1;ATF7IP;RIC3;MBD5;MYEF2;ZNF382;PBX3;PHC3;MAPK10;MAB21L3;CCDC88A;CLCN5;PPP2R2B;NEDD4;TTC3;CCSER1;KIAA1958;BRWD1;SSBP2;KIAA0825;FRYL;TNRC6B   |
| FOXJ3<br>human tf<br>ARCHS4<br>coexpression   | 84/299 | 4.2583582371<br>160024E-4 | RERE;DIDO1;SETD2;DPY19L2P3;KDM1B;CELF2;MAST2;CEP120;HNRNPU;EFCAB14;MSI2;SOGA1;ETS1;RPS6KA3;AKAP13;NIPBL;PTAR1;HERC2;HERC1;MPRIP;ZMYM4;UBAP2L;EPC2;QSOX2;NEO1;TRPC7;MBNL1;KLF12;ZHX3;CACNA2D1;VPS13D;ASH1L;TANC2;PHF20L1;SFPQ;RFX7;BIRC6;PABPC1;PAFAH1B1;ANKRD17;MACF1;DDX6;NFA15;MTMR3;WDR26;KMT2C;HERC2P2;HTT;BAZ2A;AMBRA1;MAPK8;LARP1;BTAF1;HECTD1;NSD1;HECTD4;HIVEP2;MAP4;RANBP2;USP24;SPEN;CREBBP;TRAPPC10;ERBIN;YLP1;LNPEP;AP2B1;HIPK1;FBXO32;SMARCA2;GATAD2B;SCAF4;ZZEF1;MTOR;MED13L;EXT2;CYLD;DIAPH1;KANS1;AGO2;STRN;PKN2;ESYT2;CDK12                               |
| ZCCHC11<br>human tf<br>ARCHS4<br>coexpression | 84/299 | 4.2583582371<br>160024E-4 | CCDC122;ZNF891;DRAXIN;CRYBB2P1;ZBTB25;PCDH11Y;ANKRD36;CHD9;ZNF292;USP33;ELAVL4;EFCAB6;SYNE2;NIPBL;ZNF608;ZSCAN30;PPIP5K2;CA5A;ADAMTSL3;GDAP1L1;SCAPER;ZNF521;RBM6;ANKRD36C;WSB1;CXADR;USP49;DCC;ZNF160;LRRC49;SLX4IP;MAGI2;ATRX;RFX3;VPS13B;SETBP1;IFT81;NME7;RUFY2;WDPCP;ASTN2;ANKRD36B;ZNF431;ZNF397;KMT2E;CATSPER2;GREB1L;TULP4;TPTE2P2;RGPD5;BAZ2B;NREP;NR2C1;MIPOL1;AK9;STK3;FBXL20;ORC4;KIAA1328;DZANK1;ANKRD36BP2;ANKRD10;AP4S1;SRGAP3;ATP9B;BPTF;RIC3;MBD5;ZNF382;ST8SIA1;MGA;ARHGAP28;DDHD1;MAB21L3;CCDC88A;AGO3;KANS1;TMEM116;KLHL7;NEDD4;TTC3;BRWD1;ASB3;TNRC6B |
| MEF2A<br>human tf<br>ARCHS4<br>coexpression   | 83/299 | 7.0917364209<br>08814E-4  | ATF1;RZR2;MYOM1;DOCK4;DOCK9;EFCAB14;LDB3;FRY;MYOM2;SLC8A1;SYNE1;AKAP13;FYCO1;ZFYVE26;EFR3A;ALCAM;SGCD;HERC1;MB;PEBP4;KIF13A;MYO18B;PGM5;SGCG;SH3GLB1;UNC45B;MBNL1;MEF2C;MLIP;MBNL2;ZHX3;SFMBT2;VPS13C;VPS13D;TRDN;TOM1L2;ZNF717;MYL1;KCNMA1;BMP2K;ALPK3;KCNQ5;WDFY3;ALPK2;TLN2;PPP1R12B;MACF1;RABGAP1;SMPX;PRUNE2;ITPR2;CACNA1C;TRAK1;BCL2L13;ABLIM1;SCFD2;NRAP;TBX20;TNIN1;XIRP2;ZNF106;CTNNA3;HIVEP2;MAP4;PDLIM5;SVIL;NEBL;EFL1;NEK7;SAMD4A;PDE4DIP;LNPEP;MYO9B;LHFPL2;PLXDC2;FBXO32;SMARCA2;MOB1B;CYLD;ARHGA                                                            |

|                                              |        |                          |                                                                                                                                                                                                                                                                                                                                                                                                                                                                                                                                                                     |
|----------------------------------------------|--------|--------------------------|---------------------------------------------------------------------------------------------------------------------------------------------------------------------------------------------------------------------------------------------------------------------------------------------------------------------------------------------------------------------------------------------------------------------------------------------------------------------------------------------------------------------------------------------------------------------|
|                                              |        |                          | <i>P31;ANKRD18A;RGL1;ASB2</i>                                                                                                                                                                                                                                                                                                                                                                                                                                                                                                                                       |
| HIF1A<br>human tf<br>ARCHS4<br>coexpression  | 83/299 | 7.0917364209<br>08814E-4 | <i>BCAR3;NRP1;DOCK5;TRIO;ITPRIP;C2CD2;ECE1;PTPRK;LAMC1;BACH1;BZW1;CXCL2;GALNT10;LOXL2;TUBB6;ADAMTS2;ALCAM;C16ORF72;DSE;TEAD1;ADAMTS9;IKBIP;CAST;IL1R1;MYOF;FNDC3B;AFAP1;ADAM10;ANO6;HSPG2;VCAN;FRMD6;LATS2;DPYD;CDC42EP3;CDH11;DOCK1;MET;CD44;VCL;CHST3;RAI14;YAP1;NOTCH2;GRAMD1B;WDR26;SEMA3C;NTN4;IQGAP1;FSTL1;LTBP1;PCNX1;DRAM1;CALD1;ARSJ;FAM180A;ABL2;SNX9;FLNB;CTNNA1;RANBP2;GALNT2;GALNT1;NEK7;CRIM1;DNAJC13;LAMB1;SYNJ2;ATP2B1;GNG12;KTN1;EXT1;EXT2;MYO1E;COL5A1;FAT1;ITGBL1;SNAI2;ESYT2;ACO1;ATP13A3;SEC24D;FBN1</i>                                       |
| NR3C1<br>human tf<br>ARCHS4<br>coexpression  | 83/299 | 7.0917364209<br>08814E-4 | <i>ITSN2;PI4K2B;TNFAIP8;TRIO;ANKRD33B;ATP8A1;SH3KBP1;DOCK8;EFCAB14;PTPRJ;IKZF2;BACH1;LYST;ETS1;FAM107B;DOCK10;AKAP13;ZFYVE26;EFR3A;HERC1;KIF13A;DSE;DIP2B;LRRFIP1;MAP3K5;CAST;CD96;MBNL1;ITGA4;PRKCB;ZBTB38;VPS13C;VPS13D;ARAP2;ANO6;APBB1IP;TRAF3;DPYD;AGPS;SPOPL;BIRC6;UTRN;DOCK2;WDFY4;KDM7A;NOTCH2;WDR26;HTT;ITPR2;IQGAP1;SAMS1;PCNX1;BTAF1;RAP1A;ATXN1;BTLA;SUSD6;HIVEP2;LYN;USP24;PLEKHA2;PCGF5;STAT1;TRAPPC10;NEK6;RFTN1;GPR55;NEK7;ERBIN;LNPEP;MYO9B;DNAJC13;SMARCA2;FLI1;ZEBF1;MED13L;CYLD;MYO1E;ARHGAP31;SP3;BCL2;ESYT2;ATP13A3</i>                       |
| LCORL<br>human tf<br>ARCHS4<br>coexpression  | 83/299 | 7.0917364209<br>08814E-4 | <i>SPAG16;CNTNAP2;ANKRD36;ZNF292;USP33;ELAVL4;UBE3A;PPP1R9A;NHS1;ZNF606;PPP5K2;LRRMT4;TRIM2;SNAPC3;SMARCA1;KIF21A;SOX6;ANKRD36C;WSB1;CXADR;LRRC49;TCF12;MAGI2;ATRX;RFX3;ZDHHC17;SRP9;PYGO1;SETBP1;IFT81;NME7;LRRC7;RUFY2;AKAP9;ZNF678;ASTN2;ANKRD36B;KMT2E;HDAC2;STXB4;STAU2;ATL1;BTF3L4;PIK3R3;ZNF518A;BAZ2B;NREP;NOL4;MTMR7;MIPOL1;ORC4;MAPK8;GNG2;HECTD2;MAP2;ATP9B;SCAI;ATF7IP;MBD5;MYEF2;ZNF382;ERCC6L2;RANBP17;DDHD1;ST18;ATAT1;PTPRD;CCDC88A;LRFN5;FER;CNOT7;NBEA;TMEM236;APC;ZNF738;KLHL7;ASXL3;TTC3;PARGP1;CNTN4;BRWD1;ASB3;FRYL</i>                       |
| KLF7<br>human tf<br>ARCHS4<br>coexpression   | 83/299 | 7.0917364209<br>08814E-4 | <i>ROBO2;DRAXIN;MYT1L;ZNF292;PTPRO;CELF4;ELAVL4;GRIK1;GRIK2;BICD1;GPHN;GRIP1;ZNF608;DPYSL5;TRIM2;AKT3;DNER;GDAP1L1;ZNF449;KIF21A;C19ORF18;TUBB2BP1;RALGPS1;PPFIA2;KLF12;WSB1;CXADR;DCC;RC3H1;RFX3;ANK3;RGMB;ZDHHC17;MYT1;PGM2L1;CLIP1;SETBP1;LRRC7;RUFY2;AKAP9;ALPK3;EXOC1;DEFB103A;KMT2E;GRIA1;RTN1;ATL1;NEDD4L;NREP;KALRN;STOX2;GNG2;HECTD2;MAP2;ZNF627;MYH13;TNNT1;MAP6;APBB2;NPHP4;NCAM1;CTNNA2;SRGAP3;PAK3;PAK5;MBD5;OSBPL6;CADM1;ZNF382;AUTS2;PNPLA8;MYO5A;UBE2G1;SYNJ2;DCLK1;ST18;ATAT1;CCDC88A;TTC3;YPEL1;TCF4;FSIP1;FBXL7</i>                              |
| ZNF365<br>human tf<br>ARCHS4<br>coexpression | 83/299 | 7.0917364209<br>08814E-4 | <i>DOCK3;KCNC1;FRMPD4;DIRAS2;RASGRF1;OTUD7A;KNDC1;RPH3A;UNC80;SYNPR;GRM5;AKAP11;MCF2L;NCS1;PSD3;DLGAP1;PRKACB;CALN1;KCNH1;RBFOX1;RBFOX3;TMEM178A;PRKCE;TMOD2;ANK2;MYRIP;SYN2;GABRG2;MAPK8IP1;GABRG1;AJAP1;CNKSR2;DNM3;MPED1;PITPNM3;SCN8A;KCNMA1;RAPGEF5;PLCB1;NGEF;ASTN1;RAPGEF4;SLC24A2;NECAB1;STXB1;ADAM22;SLC1A2;NDRG2;PRKCZ;NALCN;RAP1GAP;KIAA0513;GRIN2A;CHN1;CLVS2;SPOCK1;MBP;CACNG3;GPR158;ATP9A;OPCML;GABBR2;ARNT2;GABRA6;ANKRD24;SYT1;CADM2;ATRN1;SLC4A10;SYT16;KIAA1549L;MYO5A;ATP2B2;HSPA12A;SNAP91;TTLL7;DLG2;SYNJ1;PPP2R2C;RCAN2;CNTN1;SCN2A;HCN1</i> |
| ZNF84<br>human tf<br>ARCHS4                  | 83/299 | 7.0917364209<br>08814E-4 | <i>ZNF891;ANKRD36;ZNF292;USP33;MSANTD4;GPHN;CDH2;DPYSL5;TRIM2;KIF21A;ANKS1B;PDK1;MAGI1;ANKRD36C;WSB1;CXADR;HFM1;DST;LRRC49;ATRX;RFX3;TET1;ZNF271P;ANK2;ZNF14;SRP9;ITFG1;ENAH;GAP43;SETB</i>                                                                                                                                                                                                                                                                                                                                                                         |

|                                              |        |                           |                                                                                                                                                                                                                                                                                                                                                                                                                                                                                                                                          |
|----------------------------------------------|--------|---------------------------|------------------------------------------------------------------------------------------------------------------------------------------------------------------------------------------------------------------------------------------------------------------------------------------------------------------------------------------------------------------------------------------------------------------------------------------------------------------------------------------------------------------------------------------|
| coexpression                                 |        |                           | P1;IFT81;ADGRB3;LRRC7;RUFY2;AKAP9;ZNF234;ANKRD36B;ZNF397;CRB1;HDAC2;STAU2;TNKS;PLPPR5;BTF3L4;PIK3R3;BAZ2B;NREP;CACNA1E;NR2C1;STOX2;GNG2;HECTD2;MAP2;CTNNA2;SRGAP3;PAK3;PAK5;BBS2;ZNF462;MBD5;MYEF2;ZNF382;ERCC6L2;RANBP17;LSAMP;ZNF33B;ENOX1;ATAT1;PTPRD;MAPK10;TNRC6C;CCDC88A;AGO3;NBEA;APC;ZNF738;KLHL7;TTC3;TCF4;BRWD1;PTPN4;SSBP2;CCDC171                                                                                                                                                                                            |
| ETV5<br>human tf<br>ARCHS4<br>coexpression   | 82/299 | 0.0011750227<br>071781077 | SEMA5A;PLEKHB2;GLDC;CSE1L;LDLRAD3;FMN1;KIF11;LAMC1;BZW1;KIF15;PTPRG;EPS8;GRM3;SRGAP2C;SPRED2;TUBB6;ARHGAP42;SPRED1;NHSL1;PSMD2;NUF2;CWC22;BCAP29;HMCN1;PTGFRN;STK32A;TEAD1;SRGAP2B;MAPK1IP1L;SUPT16H;CSNK2A1;KCND3;TCF12;FNDC3B;RC3H1;ADGRA3;MITF;SEZ6L;EPN2;ENAH;TANC1;MELK;FRMD6;RAB38;DOCK1;CHST3;EXOC1;RAI14;MTMR2;ROCK2;CDCA5;ILDR2;ASAP2;TRPM1;C10ORF90;SDCBP;GNA14;NUAK1;MGAT5;RNF217;EXTL3;BUB1;ARNT2;STARD13;WSCD1;EFL1;MYO5A;HMGA2;UBE2G1;NETO2;SYNJ2;PTPN12;GNG12;CDC42BPA;S100B;CORO2B;NDC80;ANLN;DPY19L1;FABP7;SPIRE1;FBXL7 |
| LCOR<br>human tf<br>ARCHS4<br>coexpression   | 82/299 | 0.0011750227<br>071781077 | USP31;MYT1L;ANKRD36;ZNF292;GALNT18;CLCN3P1;ELAVL4;FRG1HP;C12ORF40;C16ORF72;NHSL1;ZNF606;LRRTM4;TRIM2;PDK1;MAPK1IP1L;ANKRD36C;KLF12;WSB1;CXADR;SLX4IP;MAGI2;ATRX;FAM118A;RFX3;PRKCA;ASH1L;OPRM1;GFRA2;ARID1B;ENAH;FRMD5;IFT81;LRRC7;RUFY2;AKAP9;BIRC6;ASTN2;ALG10B;ANKRD36B;MCPH1;UBE2Q2P1;KMT2E;TPH2;INO80D;CUL5;KMT2C;BTF3L4;RGPD6;TULP4;TPTE2P2;RGPD5;BAZ2B;NREP;NOL4;MIPOL1;NKAIN2;FBXL20;CHSY1;MAP2;ANKRD10;PAK5;MBD5;MYEF2;ZNF382;ERCC6L2;INSR;MGA;PHC3;KITLG;MFSD14C;CNOT7;DAB1;NBEA;KLHL7;TTC3;TCF4;ASB4;BRWD1;ASB3;XKR5;TNRC6B   |
| ZNF436<br>human tf<br>ARCHS4<br>coexpression | 82/299 | 0.0011750227<br>071781077 | SEMA5A;DRAXIN;THSD7B;MEGF10;SLC35F1;PPP1R9A;BICD1;PTPRG;ROBO1;SRGAP2C;TRIM9;ADAMTS3;CDH2;DPYSL5;TRIM2;AKT3;DNER;SPIN1;SACS;ITGB8;KIF21A;PTGFRN;ERC1;SOX6;SRGAP2B;MAGI1;EPHA4;DST;TET1P1;SEMA6D;ANK2;FOXP2;TANC2;PJA2;IMPACT;SETBP1;ADGRB3;RUFY2;COL21A1;ZMYND11;VSTM2A;CHST3;EXOC1;GRIA1;MACF1;MAGEL2;IGSF3;TNKS;ZBTB49;NREP;NPAS3;GNG2;MAP2;ZNF704;MVB12B;APBB2;NCAM1;TSPAN3;MAP4;JAM2;PAK5;VAT1L;RFTN2;NDFIP1;WSCD1;NTRK3;SORBS2;NETO2;AP2B1;CORO2B;DCLK1;ATAT1;PTPRD;DLG2;APC;RCAN2;TTC3;TRPV5;SPIRE1;TCF4;FBXL7;LRP12                |
| ZNF460<br>human tf<br>ARCHS4<br>coexpression | 82/299 | 0.0011750227<br>071781077 | ZNF292;SMG1P2;LTN1;SMG1P5;CDH8;SYNE1;C16ORF72;HERC1;CDH2;ZSCAN30;TRIM2;ZNF407;PPP6R3;SACS;ITGB8;WSB1;CXADR;ESCO1;DST;RAGGAP1;VPS13C;PD4D;TTC3P1;VPS13D;RFX3;VPS13B;ANK2;ASH1L;GAPVD1;ZDHHC17;SRP9;TANC2;PJA2;SETBP1;LRRC7;RUFY2;WDFY3;ZNF678;BIRC6;PIK3C3;ZNF236;UTRN;ZNF112;MACF1;NFAT5;FOCAD;INO80D;TNKS;KMT2C;BTF3L4;RGPD5;RGPD2;ARHGAP12;FGD4;BTAF1;HECTD1;HECTD2;MAP2;FUT9;ZNF704;NSD1;ZNF627;KIAA0753;CEP192;ZC3H14;ATP9B;GRIA4;GABRA2;RANBP2;MBD5;MON2;ERCC6L2;LRBA;MGA;RANBP17;LRFN5;APC;TTC3;PARGP1;BRWD1;FRYL;TNRC6B           |
| ZNF521<br>human tf<br>ARCHS4<br>coexpression | 82/299 | 0.0011750227<br>071781077 | ZNF573;CHRM3;DRAXIN;TENM3;WNT2B;TENM4;GALNT16;ZNF292;CTNND2;CELF4;LDLRAD3;MSI2;CDH9;CDH8;TTC28;ZNF608;DACH1;CDH2;DPYSL5;PSD3;SUMO2;CALN1;EPHA4;WSB1;DCC;LRRC49;TCF12;ATRX;RFX3;IL17RD;EML1;SRP9;PYGO1;IFT81;ST6GALNAC3;ASTN1;ZNF397;KHDRBS2;HDAC2;CHRNA7;GREB1L;ILDR2;NREP;HERC2P9;MED12L;NPAS3;PRTG;STOX2;MAP2;PRDM16;MAP6;CAMTA1;NCAM1;TSPAN3;CTNNA2;SRGAP3;SLIT2;ZNF423;MPDZ;TRPM3;JAM2;WASF3;TMEM132C;MYEF2;WSCD1;AUTS2;ANGPT1;PBX3;C9ORF43;PBX1;PTPRD;MAPK10;                                                                       |

|                                              |        |                           |                                                                                                                                                                                                                                                                                                                                                                                                                                                                                                                                        |
|----------------------------------------------|--------|---------------------------|----------------------------------------------------------------------------------------------------------------------------------------------------------------------------------------------------------------------------------------------------------------------------------------------------------------------------------------------------------------------------------------------------------------------------------------------------------------------------------------------------------------------------------------|
|                                              |        |                           | NELL2;ZNF618;ZNF738;COL5A3;TTC3;YPEL1;KIAA1958;SSBP2;ADGRL2;SPSB4                                                                                                                                                                                                                                                                                                                                                                                                                                                                      |
| RC3H2<br>human tf<br>ARCHS4<br>coexpression  | 82/299 | 0.0011750227<br>071781077 | TRIO;FRY;PITPNC1;SYNE2;CEP128;C16ORF72;AKAP11;HERC1;ZMYM4;TRIM2;PSD3;CHAMP1;SACS;DIP2B;ZNF600;JAK2;GUCY1A2;ACTR2;USP7;ARHGEF12;SLC13A4;KSR1;DST;NSUN2;VPS13C;PDE4D;VPS13D;ASH1L;FRMD4B;TANC2;HADHB;SFPQ;BTD;TBC1D5;SPOPL;FAR1;WDFY3;BIRC6;ZMYND11;DGKI;DTHD1;MACF1;DDX6;MTPN;NFAT5;RABGAP1;WDR26;ROCK2;ASAP2;AMBRA1;FAM214A;TM9SF3;PCNX1;MAPK8;LARP1;ATXN1;HECTD1;NSD1;HIVEP1;HIVEP2;PTCHD4;ATP9A;RANBP2;ARFGEF1;USP24;LRBA;TRAPPC10;MGA;ERBIN;MYO5A;LNPEP;TRAPPC8;DNAJC13;KIAA0232;MED13L;APC;SP3;FAT1;STRN;FAT4;BRWD1;FRYL           |
| ARX<br>human tf<br>ARCHS4<br>coexpression    | 81/299 | 0.0019784922<br>06006498  | PCSK2;ROBO2;ERO1B;TUSC3;ZNF292;PTPRO;ELAVL4;HS6ST3;SCGN;GRM7;DPYSL5;TRIM2;ZNF846;PLCE1;SOX6;ARFGEF3;RGS7;ANKRD36C;PACRG;KCND3;LRRC49;MAGI2;HUNK;UBE2QL1;TOX3;CACNB2;MDS2;MMP16;SETBP1;AKAP9;MPPED2;SCG5;SCG3;VSTM2A;RIN2;SAMD5;PDE1A;BTF3L4;NRXN3;RGPD5;BAZ2B;NREP;NOL4;SLC7A2;MTMR7;NPAS3;GNG2;TTR;MAP2;SNTG1;NCAM1;PAK3;CORIN;AKAIN1;PRELID2;RIC3;ANKRD26;PTPRN2;MYEF2;ZNF382;CADPS;POU6F2;EPHX4;ELL2;ST18;DCDC1;MOB1B;MAPK10;CCDC88A;TMEM236;KLHL7;ASXL3;TTC3;RIMBP2;CNTN1;ZNF536;CPE;TCF4;CNTN4;FGF12;XKR5                         |
| ZNF608<br>human tf<br>ARCHS4<br>coexpression | 81/299 | 0.0019784922<br>06006498  | GABRB3;RERE;SH3GL3;DRAXIN;TENM3;HIP1;TENM4;CTNND2;ELAVL4;PPP1R9A;TSPAN11;ROBO1;CDH4;DACH1;CDH2;DPYSL5;PEG10;TRIM2;HYDIN2;NEO1;PPFIA2;MAGI1;SMARCC1;WSB1;TMEM178B;ATRX;RFX3;TET1;ANK2;FRMD4A;IL17RD;SETBP1;CATSPERG;AKAP9;TNKS;GREB1L;PIK3R3;AGAP1;ILDR2;BAZ2B;NREP;KALRN;PHF21B;STOX2;CECR2;FLRT2;MAP2;ZNF704;HECTD4;MAP6;NCAM1;CTNNA2;SRGAP3;PAK3;ZNF423;MPDZ;MAP4K4;BP TF;LRRC37A3;ZNF462;AUTS2;YLPMP1;ESRRG;PTPN13;DCLK1;PBX1;PTPRD;CCDC88A;SDK1;NBEA;APC;ZNF618;WNK2;ASXL3;TTC3;TCF4;KIAA1958;EIF4G3;ADGRL2;TBATA;SPSB4            |
| EBF3<br>human tf<br>ARCHS4<br>coexpression   | 80/299 | 0.0031828582<br>20596114  | APP;DRAXIN;MYT1L;CTNND2;CELF4;ELAVL4;XYLT1;TSPAN11;SLC6A3;ROBO1;ZNF608;DACH1;DPYSL5;PEG10;DNER;GDAP1L1;KIF21A;KIF21B;EPHB2;NEO1;RPL23AP87;CHST8;DCC;CACNA2D1;EBF1;AFAP1;EBF2;UBE2QL1;GFRA1;RGMB;MYT1;AJAP1;SFPQ;GAP43;ELF2;PDZRN4;PPM1L;NTM;TMTC2;AGAP1;NREP;NYAP2;KALRN;TMEM163;NPAS3;PHF21B;STOX2;GTF2IP1;GNG2;MAP2;MAP6;NCAM1;CTNNA2;SRGAP3;ZNF423;ATP9A;MAP4K4;KLHL29;LINGO1;KCNJ6;NDFIP1;MYEF2;AUTS2;PLCL1;PCDH8;PBX3;LSAMP;CALM1P2;HSPA12A;DCLK1;PBX1;ENOX1;ATAT1;PTPRD;CCDC88A;ZNF618;ZNF536;FAT3;APBA2;SSBP3                   |
| CLOCK<br>human tf<br>ARCHS4<br>coexpression  | 80/299 | 0.0031828582<br>20596114  | PATJ;RNF11;ZFYVE9;KDM1B;LTN1;UBE3A;LCLAT1;OSBPL10;PPP1CB;SRGAP2C;EFR3A;PPP2R5E;PPP6R3;LONP2;TEAD1;UNC13C;ZHX3;ARHGEF12;DST;LIMCH1;RALGA PA1;SLC2A13;FNDC3B;VPS13B;ASH1L;FBXW2;TANC2;KIAA1217;PEAK1;ESRP1;FEZ2;AKAP9;NUMB;GEMIN5;PLIN2;WDFY3;CD44;CSNK1G1;ANKRD17;NFAT5;INO80D;PRKAA2;ROCK2;KMT2C;RGPD6;PRICKLE2;TULP4;ASAP1;FAM214A;LPP;AURKA;GNA14;NLRP8;HECTD1;ARSJ;NLRP4;HIVEP1;TRPM7;MAP4K3;RANBP2;ARFGEF1;ABCA5;MGA;DENND4C;KIAA1549L;DNAJC13;CDC42BPA;ELL2;MYO9A;PTK2;KTN1;EXT1;TJP1;MOB1B;NLRP13;SYNJ1;SLMAP;SPIRE1;CPEB4;SNTB2 |
| POU2F1<br>human tf<br>ARCHS4<br>coexpression | 80/299 | 0.0031828582<br>20596114  | GABRB3;DRAXIN;HIP1;ZMYND8;ZNF292;PSIP1;GLI2;ZNF608;SNRPD1;ADAMTSL3;FLVCR1;RBPM2;JARID2;MAGI1;WDHD1;ZNF121;SMARCC1;ADGRV1;LRRC49;TET1;IL17RD;ARID1B;SGO1;MSH6;SFPQ;MSH2;MTF2;ROR1;CCDC150;FAM72B;ZNF431;ZNF397;DDX6;HDAC2;TNKS;IR                                                                                                                                                                                                                                                                                                       |

|                                                   |        |                           |                                                                                                                                                                                                                                                                                                                                                                                                                                                                                                                               |
|---------------------------------------------------|--------|---------------------------|-------------------------------------------------------------------------------------------------------------------------------------------------------------------------------------------------------------------------------------------------------------------------------------------------------------------------------------------------------------------------------------------------------------------------------------------------------------------------------------------------------------------------------|
| sion                                              |        |                           | EB2;GREB1L;BAZ2B;GLB1L3;MIPOL1;PHF21B;FGD4;ATXN3;STOX2;APELA;GTF2IP1;RIC8B;KIAA1328;ADAMTS19;NSD1;MAP6;IGF2BP3;CLSPN;SRGAP3;ZNF423;SCAI;BPTF;ZNF462;MYEF2;SLC16A1;AUTS2;MGA;PCDH8;YLP1;ARHGAP28;ARID3B;PBX1;GATAD2B;MAB21L3;MLLT10;CCDC88A;CENPE;KANSL1;ZNF738;NEDD4;FAT3;KIAA1958;ASB3;ZNF850;TNRC6B                                                                                                                                                                                                                         |
| RCOR3<br>human tf<br>ARCHS4<br>coexpres<br>sion   | 80/299 | 0.0031828582<br>20596114  | PCSK2;SPAG16;ERO1B;LPGAT1;ATP8A1;CHD9;ICA1;ZBTB20;TMEM182;ZNF44;EFCAB6;FRY;MYLK3;IGF1R;PCMTD2;PPP1CB;SENP6;SCGN;CNST;HERC1;PIIP5K2;FBXO3;TLK1;PCMTD1;RBM6;MAPK1IP1L;LIMCH1;RALGAPA1;ABCC8;SLX4IP;VPS13C;COMMD10;VPS13B;OPRM1;ARID1B;ETV6;AKAP9;MYO3A;SCG5;SCG3;USP41;ASTN2;ZNF236;KMT2E;KMT2C;RGPD6;TULP4;RGPD5;RGPD8;ZDHHC21;FAM214A;FBXL20;GRK3;TTR;RNF217;ANKRD36BP2;USP24;RABGAP1L;ABCA5;PHKB;PARVB;DDHD1;SMARCA2;PHC3;ELL2;MOB1B;OCLN;PLCXD3;DPY19L2;AGO3;ZNF615;CCSER2;CPE;ASB4;BRWD1;ZNF354C;CPEB4;CDS2;TNRC6B;CCDC171 |
| ZFP1<br>human tf<br>ARCHS4<br>coexpres<br>sion    | 80/299 | 0.0031828582<br>20596114  | ATF2;ELAVL4;GRIK2;BICD1;TPGS2;ROBO1;PCMT1;CDH2;DPYSL5;ZNF606;LRRTM4;TRIM2;DNER;SUMO2;PHACTR3;KIF21A;TUBB2BP1;DNM1L;EPHB1;PPF1A2;RGS7;EPHA4;WSB1;CXADR;ATRX;RFX3;ANK2;SRP9;FOXP2;PYGO1;FRMD5;SETBP1;IFT81;ADGRB3;DOK5;MPPED2;IL1RAPL1;KMT2E;MAGEL2;NLGN1;HDAC2;RTN1;STAU2;TNKS;BTFL3L4;NRXN3;NREP;NOL4;MAPK8;GNG2;MAP2;FUT9;ZMAT4;CLVS2;CTNNA2;SRGAP3;PAK5;OPCML;CLVS1;ATF7IP;CADM2;RANBP17;PBX3;LSAMP;KLHL1;ESRRG;BTBD10;ATAT1;PTPRD;MAPK10;CCDC88A;CNOT7;NFIA;NBEA;APC;NFIB;KLHL7;TTC3;ZNF536;MDGA2                          |
| ZC3H11A<br>human tf<br>ARCHS4<br>coexpres<br>sion | 80/299 | 0.0031828582<br>20596114  | ITSN2;DIDO1;SETD2;LPGAT1;USP32;HNRNP;RPS6KA3;AKAP13;EFR3A;NIPBL;PTAR1;C16ORF72;HERC1;KIF13A;DIP2B;ZNF124;GABPA;PCMTD1;GTF2I;CAST;MBNL1;USP7;ARHGEF12;RALGAPA1;VPS13C;VPS13D;VPS13B;ANO6;ASH1L;FBXW2;SFPQ;CSDE1;SPOPL;WDFY3;BIRC6;UTRN;DOCK1;KDM7A;NOTCH2;MACF1;DDX6;MTPN;NFAT5;MTMR3;WDR26;ROCK1;UHRF2;ROCK2;BAZ2A;IQGAP1;TM9SF3;PCNX1;SCAF8;ABLIM1;BTAF1;HECTD1;NSD1;TRPM7;RANBP2;USP24;SPEN;CREBBP;EGLN3;HOMER2;LRBA;SIAH2;TRAPPC10;ERBIN;LNPEP;DNAJC13;HIPK1;SMARCA2;ZZEF1;MTOR;MED13L;SLMAP;SP3;STRN;PKN2;ESYT2           |
| RORA<br>human tf<br>ARCHS4<br>coexpres<br>sion    | 79/299 | 0.0050474083<br>731396864 | ITSN2;OXNAD1;DOCK9;DOCK8;CELF2;TMEM182;FRY;LYST;ETS1;SYNE2;SYNE1;DOCK10;AKAP13;HERC1;KIF13A;FAM25G;PCMTD1;CERS3;MBNL1;KLF12;GRID2;PRKCH;MBNL2;CNOT6L;ITGA4;RALGAPA1;VPS13C;VPS13D;ARAP2;VPS13B;KCNAB1;ASH1L;TC2N;IPCEF1;PARP8;INPP4B;CLIP1;PCP4;CARD18;PRKCQ;BIRC6;ZNF831;ASTN2;UTRN;KDM7A;KMT2E;MACF1;NFAT5;NLRC5;RASGRP1;CACNA1I;PCNX1;ABLIM1;ATXN1;HIVEP2;KDM4C;BCL11B;ABCA5;SEMA4D;KCNIP4;ERBIN;ADAM32;LNPEP;FOXN3;DDHD1;ARHGAP26;SMARCA2;PHC3;PARP15;MPP7;ZZEF1;TTC39B;CYLD;SNRK;CAMK4;NEDD4;CCSER2;PTPN4;CPEB4          |
| PRDM2<br>human tf<br>ARCHS4<br>coexpres<br>sion   | 79/299 | 0.0050474083<br>731396864 | CYFIP2;ITSN2;RERE;SETD2;ANKRD33B;DOCK8;CELF2;AFF3;ETS1;SYNE2;FAM107B;SYNE1;FCRLA;DOCK10;AKAP13;NIPBL;C16ORF72;AKAP11;HERC1;EPC2;MBNL1;PRKCB;NCOA6;VPS13C;VPS13D;ARAP2;VPS13B;ASH1L;IPCEF1;FCHSD2;BANK1;PACS1;SPOPL;BIRC6;UTRN;DOCK2;WDFY4;KDM7A;BLK;KMT2E;NFAT5;WDR26;ROCK1;UHRF2;KMT2C;NLRC5;HTT;BAZ2A;RASGRP1;PCNX1;HECTD4;HIVEP1;BTLA;BMF;HIVEP2;BPTF;LYN;SPEN;CREBBP;RABGAP1L;BCL11B;SEMA4D;IQSEC1;PLEKHA2;TRAPPC10;YLP1;LNPEP;MYO9B;SMARCA2;PARP15;GATAD2B;SCAF4;ZZEF1;MED13L;CYLD;ARHGAP32;KANSL1;BCL2;NFKBID           |



|                                               |        |                           |                                                                                                                                                                                                                                                                                                                                                                                                                                                                                                                                                         |
|-----------------------------------------------|--------|---------------------------|---------------------------------------------------------------------------------------------------------------------------------------------------------------------------------------------------------------------------------------------------------------------------------------------------------------------------------------------------------------------------------------------------------------------------------------------------------------------------------------------------------------------------------------------------------|
| EBF1<br>human tf<br>ARCHS4<br>coexpression    | 79/299 | 0.0050474083<br>731396864 | ZNF891;DRAXIN;PTPRO;ELAVL4;BICD1;CCDC102B;GRM1;PTPRG;ROBO1;ZNF608;DACH1;DPYSL5;DNER;GDAP1L1;ANKS1B;PPFIA2;TRPC7;USP49;DCC;CACNA2D1;LRRC49;EBF2;UBE2E2;EBF3;ANK3;RGMB;MYT1;ARID1B;PGM2L1;FOXP2;GAP43;MMP16;NAV3;SETBP1;RUFY2;AKAP9;HECW1;ARHGEF7;CNTNAP5;FTO;KMT2E;RTN1;TPTE2P5;KCNE4;CHRNA7;GREB1L;AGAP1;NREP;KALRN;TMEM163;PHF21B;FGD4;STOX2;NKAIN3;GNG2;MAP2;MAP6;NCAM1;SRGAP3;KLHL29;CADM1;AUTS2;PCDH9;PLCL1;PBX3;POU6F2;KLHL1;YLPM1;ST18;PBX1;ATAT1;NELL2;CCDC88A;RALYL;TTC3;YPEL1;GALNTL6;CDK14;LHX9                                               |
| ZNF81<br>human tf<br>ARCHS4<br>coexpression   | 79/299 | 0.0050474083<br>731396864 | KDM5A;MCTP1;THSD7B;ATP8A1;DOCK8;CELFF2;USP33;PTPRJ;TMEM260;LYST;RAB22A;SYNE1;AKAP13;NIPBL;C16ORF72;HERC1;TRAPPC11;JAK2;TRPC7;MBNL1;RALGAPA1;VPS13C;VPS13D;VPS13B;ASH1L;FAM126B;PJA2;PHF20L1;KCNQ3;SPOPL;WDFY3;BIRC6;UTRN;DOCK2;MCTP2;KDM7A;CNTNAP5;MACF1;NFAT5;NLGN1;KMT2C;BAZ2B;THADA;UBR1;FGD4;PCNX1;MAPK8;BTAF1;NSD1;FCHO2;ANKRD36BP2;TRPM7;CEP192;ST8SIA6;BPTF;AKAIN1;ARFGEF1;USP24;RABGAP1L;MBD5;FANCM;ERCC6L2;LRBA;MGA;PBX3;KLHL1;ERBIN;SYT16;LNPEF;DDHD1;SMARCA2;PHC3;CYLD;SNRK;DMXL2;STRN;FAT4;BRWD1;CCDC171                                    |
| AHCTF1<br>human tf<br>ARCHS4<br>coexpression  | 79/299 | 0.0050474083<br>731396864 | DIDO1;USP32;CSE1L;NCAPG2;LTN1;HNRNPU;KIF11;NIPBL;PTAR1;SACS;UBAP2L;DIP2B;SMARCC1;SUPT16H;USP7;NSUN2;VPS13D;URB1;PATL1;ASPM;SFPQ;TFDP1;KIFC1;CSDE1;SPOPL;WDFY3;BIRC6;PABPC1;UTRN;MET;VCL;ANAPC1;NOTCH2;MACF1;MTPN;NFAT5;WDR26;ANP32A;ROCK2;HTT;BAZ2A;IQGAP1;ACACA;TM9SF3;HIRA;PCNX1;SCAF8;LARP1;HECTD1;RACGAP1;NSD1;MAPK1;CEP192;IARS2;BUB1;RANBP2;ARFGEF1;USP24;LRBA;TRAPPC10;MGA;ERBIN;XPO7;DNAJC13;HIPK1;MTOR;MED13L;KTN1;ANLN;DIAPH1;KIF4A;SERBP1;SP3;FAT1;STRN;PKN2;ESYT2;CDK12;ATP13A3                                                             |
| SHPRH<br>human tf<br>ARCHS4<br>coexpression   | 79/299 | 0.0050474083<br>731396864 | CCDC122;ZNF891;ANKRD36;ZNF292;USP33;DPY19L2P2;GADL1;TMEM182;EFCAB6;AFF3;LCLAT1;MYLK3;CEP128;UNC80;EPB41L4A;CCDC91;HERC1;ZSCAN30;PP1P5K2;LRRTM4;ADAMTSL3;KYNU;PCMTD1;POTEC;RBM6;ANKRD36C;MAGI2;ATRX;TTC7B;VPS13B;FRMD4B;OPRM1;SHISA9;ARID1B;GAREM1;PEAK1;RUFY2;AKAP9;WDPCP;ASTN2;ZMYND11;L3MBTL4;ANKRD36B;ZNF431;FTO;SHC4;TPH2;INO80D;KCNE4;RGPD5;ATP10B;BAZ2B;GLB1L3;MIPOL1;STK3;ATXN3;ORC4;KIAA1328;ANKRD36BP2;CSMD3;ATP9B;MBD5;CEP112;SLC14A2;RANBP17;ADAM32;ARHGAP28;DDHD1;PARP15;MAB21L3;CCDC88A;NEDD4;RAB3GAP2;TCF4;ASB4;BRWD1;ASB3;TNRC6B;CCDC171 |
| RLF<br>human tf<br>ARCHS4<br>coexpression     | 78/299 | 0.0079417558<br>63418297  | KDM5A;ATF2;TCERG1;SETD2;UHRF1BP1L;ZNF292;SMG1P2;ZBTB21;LTN1;UBE3A;BACH1;SYNE2;NIPBL;C16ORF72;HERC1;ZNF407;RB1CC1;RAB8B;KPNA1;KDM6A;EPHA4;MORC3;WSB1;CXADR;ESCO1;COG5;ZNF160;ATRX;RFX3;VPS13B;ASH1L;PJA2;SDE2;BIRC6;TOX;PDZRN4;KDM7A;KMT2E;DDX6;NFAT5;HDAC2;WDR26;TNKS;KMT2C;TULP4;RGPD8;RGPD2;NOL4;SCAF8;MAPK8;BTAF1;HECTD2;MAP2;SLIT2;ZC3H15;RANBP2;USP24;ATF7IP;SPEN;CA10;KDM4C;ERCC6L2;MGA;ZBTB10;PUM1;BTBD10;MED13L;CCDC88A;NIN;NBEA;APC;TTC3;DMXL2;SP3;BRWD1;FGF12;FRYL;CPEB4                                                                      |
| ZNF385B<br>human tf<br>ARCHS4<br>coexpression | 78/299 | 0.0079417558<br>63418297  | RERE;DOCK3;ATP8A1;DIRAS2;RASGRF1;CHD6;KNDC1;SIPA1L3;IGF1R;RPH3A;UNC80;GRM5;ZNF608;MCF2L;NC S1;PSD3;DLGAP1;SYBU;ARFGEF3;PPFIA2;UNC13B;CADPS2;RBFOX1;ARHGEF12;PRKCE;RALGAPA2;TMOD2;COBL;MYRIP;SYN2;KIAA1217;TOM1L2;SCN8A;AKAP9;ADGRF5;ARHGEF7;RAPGEF5;UTRN;NGEF;RAPGEF4;ANKRD17;CASZ1;STXBP1;DNAH5;PRUNE2;ADAM22;TMPRSS2;NLK;NDRG2;PRKCZ;ACACA;RAP1GAP;KIAA0513;SV2B;HECTD4;CHN1;CLVS2;STXBP6;MAP4;CACNG3;GPR158;MARK2;A                                                                                                                                  |

|                                               |        |                          |                                                                                                                                                                                                                                                                                                                                                                                                                                                                                                                     |
|-----------------------------------------------|--------|--------------------------|---------------------------------------------------------------------------------------------------------------------------------------------------------------------------------------------------------------------------------------------------------------------------------------------------------------------------------------------------------------------------------------------------------------------------------------------------------------------------------------------------------------------|
|                                               |        |                          | TP9A;WASF3;OPCML;ZNF462;GABRA6;SYT1;HOMER2;CADM2;IQSEC1;ATP2B2;SNAP91;ARHGAP32;DLG2;PPP2R2C;WNK2;HCN1                                                                                                                                                                                                                                                                                                                                                                                                               |
| ZNF117<br>human tf<br>ARCHS4<br>coexpression  | 78/299 | 0.0079417558<br>63418297 | CCDC122;ZNF891;ANKRD36;CHD9;ZNF292;USP33;ONECUT1;ELAVL4;TMEM182;SYNE2;EPB41L4A;ZSCAN30;PPI P5K2;ADAMTSL3;ZNF568;SOX6;PCMTD1;KLF12;WSB1;CXADR;USP49;DCC;LRRC49;ATR;RFX3;TET1;VPS13B;ZNF271P;FAM126B;TOX3;SETBP1;IFT81;RUFY2;AKAP9;WDPCP;ZNF780B;ASTN2;MCTP2;ZNF431;KMT2E;HDAC2;STXBP4;BTF3L4;TULP4;PIK3R3;ZNF518A;ILDR2;BAZ2B;NREP;MIPOL1;FBXL20;ORC4;MAPK8;GNG2;MAP2;ANKRD20A5P;ANKRD10;RPRD1A;SRGAP3;DISC1;EVI5;ATF7IP;MBD5;RANBP17;DDHD1;CCDC88A;FER;AGO3;APC;ZNF738;KLHL7;TTC3;CCSER1;TCF4;BRWD1;SSBP2;ASB3;KKR6 |
| ZBTB10<br>human tf<br>ARCHS4<br>coexpression  | 78/299 | 0.0079417558<br>63418297 | SETD2;ZNF292;SMG1P2;ZBTB21;SMG1P4;CHD6;MSI2;SYNE2;IGF1R;NIPBL;ZNF608;C16ORF72;ZMYM4;RB1CC1;SMARCA1;SCAPER;ARFGEF3;ANKRD36C;RAGGAP1;ATRX;VPS13B;NSUN6;ASH1L;ZDHC17;ARID1B;MSH6;ASPM;SFPQ;SETBP1;AKAP9;MTF2;WDFY3;BIRC6;ASTN2;ANKRD17;DDX6;INO80D;TNKS;KMT2C;IREB2;RGPD6;NEDD4L;RGPD5;TMPRSS2;BAZ2B;LPP;MIPOL1;SCAF8;ZNF704;HECTD4;TRPM7;ZSWIM6;BPTF;RANBP2;ARFGEF1;ZNF462;MYEF2;HOMER2;MGA;DNAH14;PPP2R3A;MYO9A;PBX1;MED13L;MLLT10;CCDC88A;CENPE;FER;AGO3;KANSL1;CCNG2;ZNF615;PARGP1;TCF4;BRWD1;CEP44;FRYL;TNRC6B    |
| TOX<br>human tf<br>ARCHS4<br>coexpression     | 78/299 | 0.0079417558<br>63418297 | ROBO2;ATF2;DRAXIN;ZBTB25;ZNF292;ELAVL4;GRIK2;CDH8;DACH1;DPYSL5;ZNF606;TRIM2;ITGB8;GARNL3;WSB1;ST6GAL2;CXADR;KCNK10;LRRC49;TCF12;MAGI2;RFX3;ZDHC17;TOX3;SETBP1;IFT81;ADGRB3;RUFY2;MAPRE2;ANKRD36B;ASTN1;KMT2E;CRB1;MAGEL2;KHDRBS2;RTN1;PDE1A;BTF3L4;NRXN3;BAZ2B;NREP;NOL4;NKAIN3;PDCD6IPP2;GNG2;MAP2;SNTG1;FUT9;DPH6;NCAM1;TSPAN3;CTNNA2;SRGAP3;PAK3;SCAI;JAM2;GRIA4;GABRA2;ATF7IP;CA10;MYEF2;ZNF382;ST8SIA1;ERCC6L2;PBX3;SLC4A10;ATAT1;MAPK10;NELL2;LRFN5;RALYL;APC;KLHL7;TTC3;ZNF536;SSBP2;FGF12;LRP12             |
| NEUROD6<br>human tf<br>ARCHS4<br>coexpression | 77/299 | 0.0123876650<br>35661253 | TCERG1;CNTNAP2;ZNRFP2P2;MYT1L;PTPRO;GRIK3;RORB;BICD1;SRGAP2C;SLC22A14;NHSL1;ADAMTS3;TRIM2;RB1CC1;AKT3;TMEM108;PHACTR3;SOX5;RGS7;GUCY1A2;EPHA7;CXADR;USP49;CAMLG;KAZN;EML1;MPED1;LRRC7;AKAP9;HECW1;KCNQ3;RAPGEF2;ZFPM2;SHANK2;LINC00643;GRIA1;SLC24A2;PLPPR1;INO80D;CTTNBP2;NEDD4L;NREP;NYAP2;NOL4;CACNA1E;AP5M1;PCBP3;MAP2;PAK5;OPCML;CLVS1;OSBPL6;BCL11B;BCL11A;SIAH3;ERCC6L2;NTRK3;SORBS2;CORO2B;ST18;PTK2;SNAP91;ATAT1;NELL2;DAB1;NFIA;NBEA;APC;NFIB;PPP2R2B;TTC3;TCF4;FAT4;COPS8;SSBP2;LRP12;SPG21              |
| ZNF354B<br>human tf<br>ARCHS4<br>coexpression | 77/299 | 0.0123876650<br>35661253 | DIDO1;DOCK5;TRIO;DPY19L2P2;BACH1;ANTXR1;RPTOR;AKAP13;POTEM;ZFYVE26;PTAR1;DNM1P47;HERC2;C16ORF72;HERC1;ZNF407;KYNU;SACS;ARHGEF12;RAGGAP2;VPS13C;PDE4D;VPS13D;GLP2R;VPS13B;ASH1L;URB1;PEAK1;SPOPL;WDPCP;RELL1;WDFY3;BIRC6;UTRN;MCTP2;NOTCH2;MACF1;NFAT5;NBAS;KMT2C;ITPR2;LPP;ATXN3;MAPK9;PCNX1;KIAA1328;HECTD1;NSD1;HECTD4;TRPM7;CEP192;ATP9B;RANBP2;USP24;ZFHX3;ST8SIA1;LRBA;TRAPPC10;MGA;MOCOS;MICAL3;ERBIN;FLNCA;ZZEF1;MTOR;MED13L;TMPRSS15;MYO1E;NEDD4;SLMAP;AGO2;DMXL2;SP3;FAT1;ESYT2;CDK12;KIAA0825             |
| ZNF781<br>human tf<br>ARCHS4<br>coexpression  | 77/299 | 0.0123876650<br>35661253 | SLC44A5;ROBO2;MYT1L;ZNF292;PTPRO;CHRM5;ELAVL4;SLC35F1;C12ORF40;EFCAB6;PTPRG;SRGAP2C;SYNPR;GRM7;ZNF606;PPP2R5E;TRIM2;ITGB8;KIF21A;SOX6;SRGAP2B;BBS4;ANKS1B;ANKRD36C;MEF2C;WSB1;LRRC49;TMOD2;MAGI2;ATRX;ZNF271P;SEZ6L;TIAM2;MMP16;LRRC7;RUFY2;AKAP9;ZNF780B;VSTM2A;KMT2E;CRB1;IN                                                                                                                                                                                                                                      |

|                                               |        |                          |                                                                                                                                                                                                                                                                                                                                                                                                                                                                                                                                     |
|-----------------------------------------------|--------|--------------------------|-------------------------------------------------------------------------------------------------------------------------------------------------------------------------------------------------------------------------------------------------------------------------------------------------------------------------------------------------------------------------------------------------------------------------------------------------------------------------------------------------------------------------------------|
|                                               |        |                          | O80D;ATL1;BTF3L4;ZNF518A;BAZ2B;NREP;NOL4;GNG2;MAP2;SNTG1;SRGAP3;JAM2;PAK5;GRIA4;CLVS1;RFTN2;ATF7IP;SIAH3;RANBP17;SORBS2;NBEA;APC;NFIB;TMM116;KLHL7;ASXL3;TTC3;YPEL1;RSPH14;ZNF536;ZNF613;TCF4;SSBP2;KIAA0825;ASB3;XKR5                                                                                                                                                                                                                                                                                                              |
| ZNF808<br>human tf<br>ARCHS4<br>coexpression  | 77/299 | 0.0123876650<br>35661253 | CCDC122;ZNF891;ZBTB25;CHD9;ZNF292;SMG1P2;UBE3A;LYST;FAM204A;MYLK3;SYNE2;ABCC13;AKAP13;NIPBL;ACOXL;RPS6KA5;C16ORF72;HERC1;ZFP30;PPIP5K2;ADAMTSL3;PPP6R3;DLEU1;ZNF600;MAPK1IP1L;DENND2C;TANGO6;ITGA4;RALGAP1;VPS13C;VPS13B;ASH1L;ARID1B;CACNB2;AKAP9;WDPCP;BIRC6;ZNF236;UTRN;ZNF675;KDM7A;ZNF431;FTO;MACF1;CHRNA7;KMT2C;TPTE2P2;RGP5;BAZ2B;FBXL20;SCAF8;PDCD6IPP2;KIAA1328;ANKRD36BP2;TRPM7;CEP192;AP4S1;S100PBP;USP25;MBD5;MGA;LNPEP;DDHD1;PHC3;PARP15;MYO9A;CHFR;PDP2;AGO3;ZNF813;PARGP1;ZNF611;ASB3;FRA10AC1;ZNF850;TNRC6B;CCDC171 |
| SALL1<br>human tf<br>ARCHS4<br>coexpression   | 76/299 | 0.0186615204<br>99443168 | GABRB3;HIP1;TENM4;MEGF10;GLDC;CTNND2;PSIP1;LDLRAD3;SLC35F1;HMGB1;HS6ST1;SOGA1;CELSR2;KIF15;PTPRG;GLI2;ROBO1;SPRED1;CDH2;NUF2;RBPMS2;NEO1;SRGAP2B;MAGI1;WDHD1;SMARCC1;SUPT16H;ADGRV1;SEMA6D;TCF12;ADGRA3;HAUS6;NAV2;SGO1;TOX3;ASPM;SETBP1;ADCYAP1R1;PHLPP1;ILDR2;NTN1;PRTG;STOX2;CECR2;APELA;GTF2IP4;LRIG1;IGF2BP3;ZNF423;SRGAP2;EXTL3;MPDZ;BUB1;JAM2;WASF3;ZNF462;FARP1;NTRK2;MYEF2;SLC16A1;WSCD1;AUTS2;HMG2;ARID3B;PTPN13;CORO2B;AIF1L;TJP1;PTPRD;CENPE;FABP7;KIF4A;FAT3;TCF4;ADGRL2;SPSB4                                         |
| ARNT2<br>human tf<br>ARCHS4<br>coexpression   | 76/299 | 0.0186615204<br>99443168 | DOCK3;FRMPD4;MYT1L;CTNND2;DIRAS2;RASGRF1;KNDC1;RPH3A;TRIM9;GRM5;TRIM2;MCF2L;NCS1;PSD3;DLGAP1;KCNH1;RBFOX1;TMEM178A;TMOD2;ANK2;FAM219A;SYN2;MAPK8IP1;GABRG1;AJAP1;CNKSR2;MPPED1;PITPNM3;SCN8A;ADGRB1;RAPGEF5;NGEF;ASTN1;RAPGEF4;STXBP1;ADAM22;SLC1A2;AGAP1;NDRG2;KALRN;RAP1GAP;KIAA0513;CTIF;GRIN2A;PGBD5;SV2B;MAP2;GNG7;CHN1;NCAM1;CTNNA2;CACNG3;GPR158;ATP9A;WASF3;OPCM;L;GABBR2;NDFIP1;DTNA;ANKRD24;SYT1;CADM2;NTRK3;KIAA1549L;MYO5A;ATP2B2;HSPA12A;CORO2B;DCLK1;SNAP91;DLG2;PPP2R2C;RCAN2;CNTN1;SCN2A;APBA2                      |
| NR1D2<br>human tf<br>ARCHS4<br>coexpression   | 76/299 | 0.0186615204<br>99443168 | MYOM1;MYLK2;RNF11;ATP8A1;ZFYVE9;DOCK9;RORA;LDB3;JPH1;MYOM2;SYNE1;FYCO1;EFR3A;AKAP11;UBL3;SGCD;HERC1;MPRIIP;MB;PEBP4;KIF13A;MYO18B;PSD3;TEAD1;CAST;UNC45B;RBFOX1;MBNL2;ARHGEF12;DST;RALGAP1;CACNA2D1;ZBTB38;VPS13C;VPS13D;MTUS1;TRDN;INPP4B;MYL1;CSDE1;ALPK3;KCNQ5;WDFY3;PRKAA2;SMPX;ROCK2;RGP6;NDRG2;ABLIM1;HECTD1;NRAP;XIRP2;MAPK1;ZNF106;CTNNA3;HIVEP2;MAP4;RANBP2;USP24;SVIL;ABCA5;AGL;NEK7;SAMD4A;ERBIN;FBXL17;PDE4DIP;LNPEP;ATP2B2;ATP2B1;FBXO32;CYLD;KCNS3;SLMAP;STRN;ESYT2                                                   |
| NR2C2<br>human tf<br>ARCHS4<br>coexpression   | 76/299 | 0.0186615204<br>99443168 | RERE;DIDO1;TRIO;DOCK8;HNRNP;PTPRJ;LIMD1;ETS1;CABIN1;SYNE1;RPTOR;AKAP13;NIPBL;PTAR1;HERC2;HERC1;MPRIIP;NPIPA1;DIP2B;GTF2I;ARHGEF11;MBNL1;ARHGEF12;PRKCB;VPS13C;VPS13D;VPS13B;ASH1L;URB1;SFPQ;PACS1;MADD;WDFY3;BIRC6;UTRN;DOCK2;ANAPC1;KDM7A;NOTCH2;MACF1;NFAT5;WDR26;KMT2C;HERC2P2;HTT;BAZ2A;PCNX1;BTAF1;HECTD1;MAN2A2;NSD1;HECTD4;MAPK1;CEP192;HIVEP2;RANBP2;USP24;SPEN;CREBBP;MON2;LRBA;TRAPPC10;MICAL3;ERBIN;LNPEP;MYO9B;HIPK1;SMARCA2;ZEF1;MTOR;MED13L;DIAPH1;SP3;STRN;ESYT2;CDK12                                               |
| ZSCAN23<br>human tf<br>ARCHS4<br>coexpression | 76/299 | 0.0186615204<br>99443168 | SPAG16;ATF2;LTN1;ELAVL4;CWC27;PTPRG;ANKRD30BP2;CDH2;DPYSL5;TRIM2;SUMO2;SOX6;ZNF521;MAGI1;WDHD1;EPA4;ANKRD36C;ZNF880;EPA7;GUSBP1;WSB1;CXADR;KCNK10;DCC;LRRC49;TCF12;ATRX;RFX3;TET1;IL17RD;FAM126A;SRP9;SETBP1;IFT81;ADGRB3;RUFY2                                                                                                                                                                                                                                                                                                     |

|                                                 |        |                          |                                                                                                                                                                                                                                                                                                                                                                                                                                                                                                    |
|-------------------------------------------------|--------|--------------------------|----------------------------------------------------------------------------------------------------------------------------------------------------------------------------------------------------------------------------------------------------------------------------------------------------------------------------------------------------------------------------------------------------------------------------------------------------------------------------------------------------|
| sion                                            |        |                          | ;AKAP9;MPED2;ANKRD36B;KHDRBS2;HDAC2;STXBP4;TNKS;BTF3L4;GREB1L;ZNF66;BAZ2B;NRBP;NR2C1;HDAC9;GNG2;MAP2;ARSJ;ZNF627;CSMD3;SRGAP3;SLIT2;MPDZ;JAM2;PAK5;RFTN2;ATF7IP;ZNF462;FANCM;RANBP17;POU6F2;PTK2;ATAT1;MAPK10;APC;ZNF738;KLHL7;BRMS1L;TTC3;TCF4;SSBP2                                                                                                                                                                                                                                              |
| ATMIN<br>human tf<br>ARCHS4<br>coexpres<br>sion | 76/299 | 0.0186615204<br>99443168 | ZFYVE9;USP32;CSE1L;PTPRK;BZW1;ZCCHC14;CDC14B;EFR3A;AKAP11;ZMYM4;KIF13A;SPIN1;SACS;RNF17;DIAP2B;TEAD1;NEO1;NDC1;USP7;ZHX3;ARHGEF12;RRAS2;ATR;PARD3;CSDE1;ESRP1;ZMYND11;DOCK1;ANAPC1;PAFAH1B1;YAP1;RABGAP1;IGSF3;SEMA3C;ROCK2;MAPKAP1;HACD2;ACACA;TM9SF3;LARP1;ERMP1;HECTD1;RACGAP1;MGAT5;NSD1;GTF2IP4;CTNNA1;MAPK1;MAP4K3;FAM83B;ATP9A;RANBP2;ARFGEF1;TRAPPC10;GALNT1;GSR;ERBIN;DNAJC13;AP2B1;CDC42BPB;GNG12;HIPK1;MTOX;MED13L;PLEKHA8;KTN1;DAZL;TJP1;DPY19L1;DLG5;GID8;SP3;FAT1;GNAS;SPIRE1;STRN   |
| LGR4<br>human tf<br>ARCHS4<br>coexpres<br>sion  | 76/299 | 0.0186615204<br>99443168 | KCNK5;COL18A1;ABCD3;GLDC;KIAA1671;PTPRK;LAMC1;SIPA1L2;ARHGAP42;TEAD1;NEO1;PLS1;UNC13B;SMARCC1;MYOCD;ARHGEF12;ENTPD5;RRAS2;SHROOM3;ADGRA3;ANO6;ATR;PARD3;ESRP1;HKDC1;ALPK2;FREM1;CDH17;DOCK1;MET;VCL;YAP1;FBN2;ACSS3;ROCK2;LAMA1;MTTP;RRBP1;ACACA;TM9SF3;C5;APELA;UGP2;HECTD1;ADGRG7;TBX20;MAP7;CTNNA1;ABL1;FLNB;IARS2;IGF2BP3;PDLIM5;RANBP2;SLC16A1;NEBL;GALNT1;GSR;AKR1C3;LAMB1;B3GALT5;CDC42BPB;GNG12;PTPN13;ASS1;ISX;KTN1;TJP1;MYO1D;MYO1E;BMP2;CPS1;MYO5B;SERBP1;FAT1;ADGRL2                   |
| RARB<br>human tf<br>ARCHS4<br>coexpres<br>sion  | 75/299 | 0.0270545093<br>31880916 | SEMA5A;MIPEP;RZR2;BNC2;ZFYVE9;SYCP1;DPY19L2P1;SLC2A3;LAMC1;LDB2;MEOX2;SLC8A1;ROBO1;ARHGAP42;CDH2;SPIN1;TUBB2BP1;RGS8;DIRC3;RNF152;TEAD1;ADAMTS9;PRKG1;KCNH1;KPNA1;POSTN;MUSK;TPM1;WDR72;DKK2;NRBP1;CNKSR2;TANC1;VCAN;AGPS;CDH11;ALPK2;TLN2;ST6GALNAC3;FREM1;DOCK1;KANK4;TRABD2B;DGKI;RAI14;FBN2;FOCAD;SAR1A;SEMA3D;TMTC2;SEMA3E;RANBP3L;FLRT2;CALD1;ERBB4;CTNNA1;ALX4;CCDC141;ZNF423;RXRG;MPDZ;STARD13;CNTN5;NEBL;TXNRD2;PCDH7;LAMB1;GNG12;MCC;PTPN13;ARHGAP24;TJP1;DLC1;SNAI2;NF2                 |
| DMTF1<br>human tf<br>ARCHS4<br>coexpres<br>sion | 75/299 | 0.0270545093<br>31880916 | KDM5A;ANKRD36;CHD9;DPY19L2P1;CELF2;USP33;SMG1P5;C12ORF40;CROT;BICD1;RZR3;SYNE2;PCMTD2;SENP6;AKAP13;DSTYK;NIPBL;C16ORF72;HERC1;ZSCAN30;PIIP5K2;LUC7L;RBM6;ANKRD36C;RALGAP1;VPS13C;VPS13B;FAM126B;ARID1B;GOLGA8B;AKAP9;BIRC6;ASTN2;ZMYND11;MCTP2;ALG10B;CREB5;KMT2E;MACF1;TPH2;TNKS;KMT2C;RGPD5;BAZ2B;HERC2P9;MIPOL1;SCAF8;BTAF1;KIAA1328;ANKRD10;ATP9B;S100PBF;BPTF;USP24;ATF7IP;MBD5;RANBP17;ADAM32;LNPEP;DDHD1;PHC3;PARP15;MLLT10;FER;APC;KANS1;BCL2;CEP83;PKN2;TCF4;BRWD1;PTPN4;ASB3;FRYL;TNRC6B |
| PAX3<br>human tf<br>ARCHS4<br>coexpres<br>sion  | 75/299 | 0.0270545093<br>31880916 | TENM3;WNT2B;MEGF10;DENND1A;CCDC102B;ROBO1;ZNF608;NHSL1;DACH1;CDH2;PEG10;TRAPPC11;ITGB8;EPHB2;ZNF521;ANKRD6;WSB1;ADGRV1;KCNK10;DST;TCF12;RFX3;TET1;PLA2G4A;PARD3B;ENAH;TOX3;MYCL;ANKFN1;SETBP1;IFT81;ARMC6;ADGRB3;ATF6;SMPDL3A;GRIA1;MTMR2;STXBP4;GREB1L;GLIS3;PRDM13;NR2C1;OAZ2;NPAS3;PRTG;STOX2;GNG2;HECTD2;CALD1;PLXNA2;NHHS;TSPAN3;CSMD3;SRGAP3;ZNF423;LRRC4C;MPDZ;BBS2;NTRK2;MYEF2;WSCD1;AUTS2;NOS2;ST8SIA1;RANBP17;PXDN1;PHKB;PTPN13;ZNF33B;TMEM232;MAPK10;TTC3;FAT3;FAT4;BMPR1B              |
| IRX1<br>human tf<br>ARCHS4<br>coexpres          | 75/299 | 0.0270545093<br>31880916 | APP;DRAXIN;TENM2;TENM3;MEGF10;CTNND2;MSI2;SIPA1L2;HS6ST1;CELSR2;TSPAN11;CDH4;ZNF608;DACH1;CDH2;DPYSL5;PEG10;TRIM2;ITGB8;KIF21A;ANKRD20A7P;EPHB2;TMEM178B;EBF2;RFX3;KAZN;EBF3;FRMD4A;FAM219A;IL17RD;RGMB;SORCS2;CFDP1;TNIK;CHST3;G                                                                                                                                                                                                                                                                  |

|                                                  |        |                          |                                                                                                                                                                                                                                                                                                                                                                                                                                                                                                            |
|--------------------------------------------------|--------|--------------------------|------------------------------------------------------------------------------------------------------------------------------------------------------------------------------------------------------------------------------------------------------------------------------------------------------------------------------------------------------------------------------------------------------------------------------------------------------------------------------------------------------------|
| sion                                             |        |                          | RIA1;IGSF3;NXN;GREB1L;AGAP1;MLLT1;NPAS3;PHF21B;STOX2;GTF2IP1;GNG2;MAP2;CDH20;PLXNA2;MAP6;NCAM1;SRGAP3;ZNF423;EXTL3;BRD4;MAP4K4;TMEM132C;NTRK2;NDFIP1;MYEF2;WSCD1;AUTS2;PCDH8;YLPM1;PXDNL;ESRRG;NETO2;ZDHHC11B;DCLK1;PTPRD;SDK1;ZNF618;PTPRA;TTC3;SPSB4                                                                                                                                                                                                                                                     |
| ZBTB20<br>human tf<br>ARCHS4<br>coexpres<br>sion | 75/299 | 0.0270545093<br>31880916 | CCDC122;ZNF891;PATJ;ZBTB25;MYT1L;CELF4;EHMT1;KLHL33;TMEM182;MYLK3;SYNE1;UNC80;EPB41L4A;RPS6KA5;CA5A;ADAMTSL3;OPA3;ERC2;USP8;ANKRD36C;MAGI2;TTC7B;ABCC9;SORCS3;SHISA9;ARID1B;NAALADL2;SLC9A4;SPATA17;MYO3B;SETBP1;PEAK1;CNKSR3;WDFCP;ZNF780B;ASTN2;PPARA;ANKRD36B;LINC00643;SDC CAG8;ZNF397;FTO;KCNE4;NMD3;BAZ2B;LPP;MIPOL1;FBXL20;ORC4;DPP6;KIAA1328;FLRT2;ZNF704;AP4S1;PAK3;SCAI;MBD5;KCNJ6;CADM1;NEGR1;HOMER2;NUBPL;PCDH8;KCNJ15;HOOK3;BTBD9;PHC3;CNOT7;AGO3;NEDD4;RGS12;CEACAM22P;ASB3;C8ORF34;TNRC6B   |
| RFX7<br>human tf<br>ARCHS4<br>coexpres<br>sion   | 75/299 | 0.0270545093<br>31880916 | LIN54;DIDO1;SETD2;ATP8A1;CELF2;HNRNPU;PSIP1;MSI2;NIPBL;HERC1;GNPTAB;ZMYM4;MYB;SACS;SMARCA1;EPC2;QSOX2;GTF2I;KDM6A;AQR;MEF2C;SMARCC1;ITGA4;TANC2;RUNX1;SFPQ;FCHSD2;AGPS;GCSAML;BIRC6;PABPC1;MCTP2;ANAPC1;ANKRD17;MACF1;DDX6;NFAT5;ANP32A;TNKS;HTT;ITPR2;BAZ2A;SCAF8;LARP1;BTAFL1;HECTD1;FUT9;NSD1;HECTD4;CEP192;BPTF;RANBP2;USP24;SPEN;CREBBP;TRAPPC10;YLPM1;RANBP9;XPO7;LNPEP;FOXN3;PUM1;GATAD2B;SCAF4;MED13L;PLEKHA8;MLLT10;APC;KANSL1;AGO2;SP3;STRN;CDK12;PTPN4;EIF4G3                                   |
| ZBTB44<br>human tf<br>ARCHS4<br>coexpres<br>sion | 75/299 | 0.0270545093<br>31880916 | PATJ;ZFAND6;CSE1L;CELF2;PCDH11X;PSIP1;BRCA2;JPH1;LRRC2;PCMTD2;PPP1CB;PTAR1;C16ORF72;HERC1;ZMYM4;MYB;MYO18B;PPP6R3;PHACTR2;TLK1;PRKG1;PCMTD1;ZNF121;AQR;LYPLA1;CNOT6L;SNRPN;ESCO1;RALGAP2;VPS13C;ATP11C;GOLGA8J;HAUS6;ARID1B;TRDN;ENAH;MSH6;MSH2;THRAP3;PRKCQ;BIRC6;B4GALT6;CCDC150;UBE2Q2P1;INO80D;PRKAA2;IREB2;ZNF518A;GLB1L3;APELA;SCAF8;UGP2;ADAMTS19;NRAP;XIRP2;ZNF106;NUP43;BARD1;RANBP2;ARFGEF1;USP24;USP25;SLC16A1;AGL;MGA;LNPEP;UBE2G1;FOXN3;TTC39C;PHC3;CENPE;SLMAP;GNAQ;BRWD1;PTPN4              |
| SIM1<br>human tf<br>ARCHS4<br>coexpres<br>sion   | 75/299 | 0.0270545093<br>31880916 | PCSK2;SEMA5A;MYOM1;ERO1B;ZFAND4;PTPRQ;SLC35F4;ZBTB20;LCLAT1;LRRC2;SCGN;FYCO1;C10RF127;SGCD;MYO18B;SLC16A9;ARFGEF3;PCMTD1;MLLP;ZNF705D;ILL1R1;RALGAP1;ABCC8;SLC2A13;ABCC9;TRDN;ABCA10;PLCB4;NAV3;RRAGD;COL4A3;MYO3A;GAS2;SCG5;ALPK3;SCG3;RIN2;RWDD2B;INO80D;PRKAA2;SMPX;STXBP4;GLIS3;NOL4;NALCN;SLC7A2;TTR;NRAP;SUSD4;XIRP2;TSPAN2;STXBP6;AKAIN1;PTPRN2;ABCA5;CNTN5;CADPS;PDE4DIP;PARVB;BTBD9;CDC42BPA;ELL2;MEIS2;BMP5;MOB1B;TBX15;OCLN;PLCXD3;AGBL1;TMEM236;ASXL3;RIMBP2;CPE;CNTN4;CPEB4                   |
| ARID5B<br>human tf<br>ARCHS4<br>coexpres<br>sion | 75/299 | 0.0270545093<br>31880916 | SEMA5A;DOCK5;BNC2;PTPRQ;FHL2;ZBTB20;SLC35F1;GXYLT2;LCLAT1;EPS8;PPP1CB;SRGAP2C;SLC25A48;ADAMTS5;NHSL1;LONP2;PHACTR2;ITGB8;ZNF568;PHACTR1;SRGAP2B;ADAMTS6;MAPK1IP1L;CCBE1;DST;LIMCH1;SLX4IP;PRKCA;ENAH;INPP4B;SPATA17;FRMD6;CRISPLD2;CDH11;ALPK2;RIN2;ATF6;CD44;RBMS3;RWDD2B;CEMIP;FICD;SAR1A;COPB1;PRICKLE2;GLIS3;ANKRD19P;NEDD9;CARM1P1;LPP;FBLN5;MYL12B;ATXN1;CALD1;ARSJ;PDGFC;RNF217;EVI5;LRRC69;STARD13;CRIM1;TTC39C;CDC42BPA;RCAN1;TBX15;DLC1;TMEM117;STT3A;ITGBL1;SNAI2;NF2;SEC24D;LRP12;TNRC6B;SNTB2 |
| ZNF780B<br>human tf<br>ARCHS4<br>coexpres        | 75/299 | 0.0270545093<br>31880916 | CCDC122;ZNF891;ZBTB25;MYT1L;CHD9;ZNF292;USP33;DPY19L2P2;IPP;EHMT1;ZBTB20;TMEM182;MYLK3;SYNE2;UNC80;SYNPR;RPS6KA5;HERC1;CA5A;ADAMTSL3;SOX6;KLF12;SEMA6D;VPS13C;VPS13B;ABCC9;SHISA9;ZNF14;ARID1B;ADGRB3;CATSPERG;RUFY2;CNKSR3;WDPCP                                                                                                                                                                                                                                                                          |

|                                                 |        |                          |                                                                                                                                                                                                                                                                                                                                                                                                                                                                                                   |
|-------------------------------------------------|--------|--------------------------|---------------------------------------------------------------------------------------------------------------------------------------------------------------------------------------------------------------------------------------------------------------------------------------------------------------------------------------------------------------------------------------------------------------------------------------------------------------------------------------------------|
| sion                                            |        |                          | ;BIRC6;ASTN2;ZNF234;ANKRD36B;CDH18;ZNF431;FTO;MACF1;TPTE2P2;ZDHHC21;BAZ2B;MTMR7;MIPOL1;FBXL20;FGD4;ORC4;KIAA1328;HIVEP1;AP4S1;SRGAP3;SCAI;MBD5;SLC14A2;MYEF2;ZNF382;MGA;AMFR;ADAM32;ARHGAP28;DDHD1;PARP15;CCDC88A;AGO3;TMEM116;YPEL1;CEACAM22P;BRWD1;ASB3;ZNF850;C8ORF34;TNRC6B                                                                                                                                                                                                                   |
| CHD1<br>human tf<br>ARCHS4<br>coexpres<br>sion  | 75/299 | 0.0270545093<br>31880916 | ITSN2;KDM5A;TCERG1;SETD2;DOCK8;SMG1P2;HNRNPU;BRCA2;BACH1;LYST;SYNE2;KIF15;AKAP13;NIPBL;PTAR1;C16ORF72;HERC1;RB1CC1;PPP6R3;LRRFIP1;JARID2;ZNF367;ANKRD36C;AQR;MBNL1;SMARCC1;USP7;MORC3;ESCO1;ITGA4;VPS13C;VPS13B;HAUS6;BAZ1A;ASH1L;PARP8;PHF20L1;ASPM;SFPQ;SDE2;BIRC6;UTRN;DOCK2;KDM7A;KMT2E;DDX6;WDR26;ROCK1;KMT2C;RGPD8;PCNX1;SCAF8;BTAF1;NSD1;CEP192;BPTF;ARFGEF1;USP24;SPEN;TRAPPC10;MGA;ERBIN;ZBTB10;DDHD1;HIPK1;MED13L;CYLD;CENPE;SNRK;KANS1;DMXL2;SP3;PKN2;CDK12;BRWD1                      |
| ISL1<br>human tf<br>ARCHS4<br>coexpres<br>sion  | 74/299 | 0.0396161403<br>1621126  | PCSK2;SPAG16;ERO1B;TUSC3;SLC35F4;ICA1;LCLAT1;HS6ST3;RIMS2;SCGN;C10RF127;ACOXL;FAM3B;PLCE1;TLK1;SAMD12;SCAPER;RGS9;ARFGEF3;RGS7;ABCC8;SLC2A13;SLX4IP;MTUS2;FNDC3A;ZDHHC14;CACNB2;RRAGD;CDC42EP3;MYO3A;GAS2;SCG3;USP41;RIN2;LINC00643;SAMD5;RWDD2B;INO80D;RGPD6;USH1C;RGPD5;HSD17B14;NOL4;SLC7A2;MTMR7;TTR;SUSD4;TSPAN2;SUSD6;AKAIN1;KCNJ6;PTPRN2;ABCA5;WSCD2;CADPS;POU6F2;PARVB;CDC42BPA;ELL2;USH2A;ST18;BMP5;MOB1B;OCLN;PLCXD3;TMEM236;ASXL3;RIMBP2;CNTN1;GNAS;RSPH14;CPE;CNTN4;CPEB4             |
| SP4<br>human tf<br>ARCHS4<br>coexpres<br>sion   | 74/299 | 0.0396161403<br>1621126  | ZNF891;UHRF1BP1L;TUSC3;ZNF292;SMG1P4;UBE3A;SLC6A1;CRKL;ZSCAN30;ZNF606;PPP2R5E;PPP6R3;SUMO2;LUC7L;TMEM38B;ZNF521;SRGAP2B;ZNF287;MEF2C;LYPLA1;WSB1;ST6GAL2;CXADR;DSCAM;LRRC49;TTC3P1;MAGI2;HUNK;UNC5D;KIF6;SRP9;MMP16;ZNF675;ZNF234;MCPH1;ZNF397;KMT2E;HDAC2;TNKS;BTF3L4;NRXN3;TULP4;TPTE2P2;RGPD5;BAZ2B;NREP;NYAP2;HERC2P9;NOL4;GLB1L3;ATP6AP1L;FBXL20;GNG2;DZANK1;SNTG1;SYNDIG1;CLVS1;MYEF2;RNGTT;BCL11B;ZNF382;CNOT7;TMEM116;ZNF738;TDP1;KLHL7;ZNF813;ABI1;CCSER1;TCF4;PTPN4;TRMT61B;XKR5;TNRC6B |
| ATF2<br>human tf<br>ARCHS4<br>coexpres<br>sion  | 74/299 | 0.0396161403<br>1621126  | GABRB3;ZNF292;ELAVL4;BACH1;PCMTD2;DPYSL5;TRIM2;SPIN1;FBXO3;KIF21A;TUBB2BP1;PRKACB;TRIM23;PCMTD1;MAPK1IP1L;WSB1;CXADR;DCC;VPS13C;RFX3;ANK2;ZDHHC17;RUNX2;SRP9;PGM2L1;PJA2;PIAS1;PYGO1;LATS2;MDFIC;LRRC7;RUFY2;NAA35;ZNF678;TOX;KMT2E;GRIA1;STX12;RTN1;STAU2;TNKS;ATL1;BTF3L4;TULP4;ZNF518A;NREP;NOL4;GNAI1;MAPK8;GNG2;HECTD2;MAP2;SNTG1;CTNNA2;PAK3;CADM1;SYT1;SYT16;PUM1;OXR1;FAM217B;ATAT1;PTPRD;MAPK10;CNOT7;SYNJ1;APC;KLHL7;TTC3;CNTN1;TCF4;BRWD1;SSBP2;CDS2                                   |
| NR3C2<br>human tf<br>ARCHS4<br>coexpres<br>sion | 74/299 | 0.0396161403<br>1621126  | SLC46A3;PATJ;LPAT1;DHRS11;PPP1R13B;ATP8A1;KDM1B;DOCK9;KIAA1671;SLC4A4;SYNE1;FYCO1;HERC1;DMBT1;KIF13A;CAPN5;FAM3B;MALRD1;TINAG;NEO1;PLS1;UNC13B;CAST;ZHX3;ARHGEF12;RALGAP1;ENTPD5;SLC2A13;VPS13C;VPS13D;MTUS1;ARAP2;OLFM4;CEACAM7;CDH17;SMPDL3A;ENPEP;SLC26A2;RBM47;MTMR3;HHLA2;MTTP;SLC1A1;USH1C;TMPRSS2;ATP10B;SLC5A12;SLC5A1;TRAK1;PBLD;ABLIM1;ADGRG7;NRAP;XIRP2;HIVEP2;CLCA4;CNNM4;SVIL;MGAM;ABCA5;REG4;ERBIN;CYBRD1;PDE4DIP;LNPEP;B3GALT5;ZCEF1;ISX;MYO1D;NLRP13;ARHGAP32;TMEM54;MYO5B;GIPC2  |
| POU3F4<br>human tf<br>ARCHS4<br>coexpres        | 74/299 | 0.0396161403<br>1621126  | DRAXIN;CHD9;CTNND2;ELAVL4;MSANTD4;TSPAN11;DACH1;CDH2;DPYSL5;GDAP1L1;KIF21A;EPHB2;EPHB1;WSB1;ADGRV1;CAMK1D;KCNK10;LRRC49;KCNH8;TCF12;RFX3;KCTD1;EBF3;RGMB;GAB4;TOX3;GAP43;PCCA;SETBP1;ADGRB3;MPPE2;GRIA1;HDAC2;CHRNA7;NTM;GREB1L;                                                                                                                                                                                                                                                                  |

|                                                  |        |                         |                                                                                                                                                                                                                                                                                                                                                                                                                                                                                                                          |
|--------------------------------------------------|--------|-------------------------|--------------------------------------------------------------------------------------------------------------------------------------------------------------------------------------------------------------------------------------------------------------------------------------------------------------------------------------------------------------------------------------------------------------------------------------------------------------------------------------------------------------------------|
| sion                                             |        |                         | BAZ2B;NREP;NPAS3;PHF21B;STOX2;MAPK8;NKAIN3;GN<br>G2;MAP2;MVB12B;MAP6;CAMTA1;NCAM1;CTNNA2;SRGAP<br>3;ZNF423;LRRC4C;JAM2;FOXB1;ZNF462;NTRK2;MYEF2<br>;ZNF382;AUTS2;PLCL1;PCDH8;PBX3;PBX1;ENOX1;ATA<br>T1;PTPRD;MAPK10;CCDC88A;ZNF738;FABP7;TTC3;FAT<br>3;TCF4                                                                                                                                                                                                                                                              |
| NPAS4<br>human tf<br>ARCHS4<br>coexpres<br>sion  | 74/299 | 0.0396161403<br>1621126 | PCSK2;GABRB3;PTPRT;INTS12;ERO1B;DOCK3;MYT1L;T<br>USC3;CTSD1;CELF4;PPP1R9A;RIMS2;IQCJ-<br>SCHIP1;UNC80;SCGN;HYDIN2;ERC1;RGS9;ARFGEF3;AN<br>KS1B;ABCC8;LRRC49;MAGI2;FOXP2;CACNB2;EML6;LRR<br>C7;SCG5;SCG3;ZNF236;RIN2;LINC00643;SAMD5;FTO;<br>STOML1;CTTNBP2;STXBP1;ATL1;PLPPR5;HSD17B14;CA<br>CNA1C;NREP;KALRN;NOL4;SLC7A2;MTMR7;DPP6;UNK;P<br>DZD2;TTR;HECTD4;SUSD4;PAK3;ATP9A;LINGO2;ZNF46<br>2;PTPRN2;GABRA5;CADPS;POU6F2;SYT16;ELL2;GRIN2<br>B;MEIS2;ST18;ATAT1;MOB1B;NELL1;PPP2R2B;ASXL3;<br>RIMBP2;RSPH14;CPE;CNIH3 |
| YEATS2<br>human tf<br>ARCHS4<br>coexpres<br>sion | 74/299 | 0.0396161403<br>1621126 | APP;DIDO1;MAST2;HNRNPU;MSI2;LAMC1;IKZF2;SOGA1<br>;ROBO1;CABIN1;RPTOR;HERC2;SMPD4;HERC1;MPRIP;Z<br>MYM4;PIEZO2;SACS;ANKFY1;UBAP2L;DIP2B;QSOX2;GT<br>F2I;SMARCC1;KSR1;DST;VPS13D;UBE2E1;NAV2;URB1;<br>SND1;SREBF2;BCR;SFPQ;KIFC1;BIRC6;ARHGEF7;DOCK<br>1;ANAPC1;MACF1;HERC2P2;CLEC16A;HTT;FOXK2;BAZ2<br>A;ACACA;LARP1;BTAF1;HECTD1;MTHFD1L;MGAT5;NSD1<br>;HECTD4;ABL1;GSE1;IGF2BP3;MAP4K4;SPEN;FARP1;T<br>AF15;LRBA;MICAL3;YLP1M1;FANCA;DNAJC13;AP2B1;CD<br>C42BPB;MTOR;SMARCA4;AGO2;FAT1;BCL2;STRN;CDK12                  |

**Table S4.** The overlap between the top-rDNA-contacting genes obtained from untreated K562 cells (3699 genes) and for HEK293T cells (4920 genes). Related to the Venn diagram presented in Figure 1C.

| Names           | total | elements                                                                                                                                                                                                                                                                                                                                                                                                                                                                                                                                                                                                                                                                                                                                                                                                                                                                                                                                                                                                                                                                                                                                                                                                                                                                                                                                                                                                                                                                                                                                                                                                                                                                                                                                                                                                                                                                                                                                                                                                                                                                                                                                                                                                                                                                                                                                                                                                                                                                                                                                                                                                                                                                                                                                                                                                                                                                                                                                           |
|-----------------|-------|----------------------------------------------------------------------------------------------------------------------------------------------------------------------------------------------------------------------------------------------------------------------------------------------------------------------------------------------------------------------------------------------------------------------------------------------------------------------------------------------------------------------------------------------------------------------------------------------------------------------------------------------------------------------------------------------------------------------------------------------------------------------------------------------------------------------------------------------------------------------------------------------------------------------------------------------------------------------------------------------------------------------------------------------------------------------------------------------------------------------------------------------------------------------------------------------------------------------------------------------------------------------------------------------------------------------------------------------------------------------------------------------------------------------------------------------------------------------------------------------------------------------------------------------------------------------------------------------------------------------------------------------------------------------------------------------------------------------------------------------------------------------------------------------------------------------------------------------------------------------------------------------------------------------------------------------------------------------------------------------------------------------------------------------------------------------------------------------------------------------------------------------------------------------------------------------------------------------------------------------------------------------------------------------------------------------------------------------------------------------------------------------------------------------------------------------------------------------------------------------------------------------------------------------------------------------------------------------------------------------------------------------------------------------------------------------------------------------------------------------------------------------------------------------------------------------------------------------------------------------------------------------------------------------------------------------------|
| HEK293T<br>K562 | 1486  | <p>CD44 SAMD4A KCNMA1 C10orf90 PKNOX2 RALYL ZHX3 APBB2 GLT1D1 GGT3P PTPRR SCAF8 CPXM2<br/>RTN1 ERG PARN PDE1C SEMA4D INIP WSCD1 SLC12A8 IGSF3 MED13L ZFYVE1 EVC TEAD1 NFIA SYN3<br/>RPS6KA5 POTES SUGCT DHRS11 CCDC34 TAOK3 GADLI PRKCB EIF4G3 A2M TRPM6 CPNE4 SLC8A1<br/>ARHGEF26-AS1 ANKRD6 KCNC1 GPR55 DNAJC15 SIAH3 CD38 LINC00159 ZNF257 VATIL FBXO31<br/>C12orf40 PIWIL3 TRAPPC9 FAM182B FNDC1 BCL2 MMP16 CAMTA1 SAMS1 CHFR THADA COL18A1<br/>TOX3 RSRC1 THRB FGF7P2 DNAH11 ZSCAN5C CDC42BPA SLC13A4 B3GALT5 RAG1 SAMM50 CDC42EP3<br/>FSIP1 GRIK2 IGSF11 SNX25 DPYD UNC13B MAPK10 NCAM1 OTX2-AS1 KDM4B GNG12 IL6R KCNQ5<br/>CDH8 ZBTB20 HEPHL1 IGHV11-82 SCN11A ATP10A SORBS2 SKAP2 HS1BP3 GOT2 KCNJ6 CASP5 PCAT1<br/>KCNK10 BLOC1S5-TXNDC5 RNF182 BRD4 ZDHHC11B GPR158 ZNF568 NDRG2 TMEM241 GRIP1 APBA2<br/>TTC3 CPVL MIR3118-2 TLK1 ASTN2 TANC2 KIF4A CSMD3 DLGAP1 DUX4L15 RCAN1 FAM193A NTN4<br/>GTF2IP1 JAK2 LINC00348 TM9SF4 BICD1 LRP1B ZBTB80S MIR17HG ABCG8 KRTAP26-1 OTUD7A TPTE2<br/>ANKRD20A5P KALRN SUMF1 USH2A NEGR1 FGF12 CACNG2 BTBD9 CASC9 NFAT5 FLII SLC44A5<br/>MEGF11 SPATS2L LINC00882 TRHDE ZNF536 EPB41L3 LAMA1 PARVB CDH11 SETBP1 ZBTB7C CDS2<br/>GRIN2A MAST4 NRXN1 WDR26 DTWD2 AGBL1 NELL2 ARID1B DEFT1P2 DPY19L2P2 IL1RAPL1 WDPCP<br/>NIPA2 MAG11 LAMA3 SLC14A2 ADAMTS17 GBP4 PTCSC3 ADCYAP1R1 ST6GALNAC3 CTDP1 RERGL<br/>ADAMTS6 DPP6 PRELID2 GOLGA8J GRID1 XKR3 RPS6KA2 TDP1 PTGER4P2 LINC00504 SMOC2<br/>ZDHHC17 KCNH1 HLCS ACSS3 CNBD1 DCDC1 CACNA1C CCSE2 AMPH BMF EXOC4 HEATR5A WDR70<br/>CKMT1B PNPLA3 ANO4 GIPC2 BBS9 FAM83B CTNNA1 NCOR1P1 MYO9A NTRK2 FOXN3 ENTHD1<br/>WDFY3 C19orf18 OCLN AK8 NLK ITGBL1 THSD7A ABCA6 NBEA POTES ANKRD30BP2 RASGEF1B AFAP1<br/>NCAM2 DPY19L2P1 TIAM2 MYT1L TMPRSS3 SRGAP2B IQCJ-SCHIP1 CARM1P1 LRRC49 LINC00273<br/>SMARCA4 HERC2P3 RNF152 CNTN1 ZNRF3 PALMD MEOX2 TTC39B ENPEP PLEKHB2 GLIS3 OR4K6P<br/>ANKRD36 NRG3 PTPRG MC2R BTBD11 ELMO1 SLC24A4 CABIN1 SYNE1 ABCD1P4 FBXO47 FBXL17<br/>SLC9B1P4 PDZD2 ANKRD20A9P DNAH10 GAS2 GRIK3 CACNB2 PDE10A NUMB STXBP4 MED15 MTPN<br/>MT1HL1 ESYT2 SOX6 MECOM POTES SYBU TBC1D22A PDE4DIP TRPM3 STK32B LINC01020 VCAN<br/>POTEB2 DNAH8 NHS CNTNAP5 RGS12 SHANK2 RAPGEF5 UBE2E2 PTGFRN NBEAP1 KCTD8 CHCHD6<br/>UNC5D HS3ST2 EVA1A ZNF567 NREP GABRA5 DOK5 AGMO DLG5 CFDP1 PGM5 SMARCA11 MIR3118-3<br/>FNDC3B ZIM3 ASTN1 ADAMTS9-AS2 AIFM3 GNG12-AS1 ATRNL1 DUX4L2 CHRM3 CPE CALD1 AIG1<br/>ERICH1 ABCC13 ARHGAP24 TMEM132D EFCAB8 SPRED2 N4BP2L1 IGHV10R15-9 LINC00907 SLIT2<br/>PITPNC1 TPTE2P6 MYLK3 C2orf88 CEP128 ABCA5 POTES ROR1 GLP2R CCDC178 SLC4A4 ADAMTSL1<br/>KAZN ZNF675 CSNK2A1 DTNA AKT3 CRB1 PHKB KMT2C KCNE4 TRIM5 KCNS3 RPL23AP82 CYP4B1<br/>PSD3 ALPK2 ABCA13 HECW1 RAP1GDS1 AFF3 LCE1F ERBB4 KANK1 STT3A GPHN LPP VWFP1 ATRX<br/>DMRT1 SLC9B1P3 CHST8 BID MACF1 MEF2C-AS1 MNAT1 TAF4B RAP1A TRIO ZNF385D SLC15A5<br/>CTNBL1 RAD51B TRMT61B PTPRE TSPAN3 EPDR1 MYO3B DUSP22 CHSY1 MYOM1 PSG8 EXT2 URB1</p> |

|  |  |                                                                                                                                                                                                                                                                                                                                                                                                                                                                                                                                                                                                                                                                                                                                                                                                                                                                                                                                                                                                                                                                                                                                                                                                                                                                                                                                                                                                                                                                                                                                                                                                                                                                                                                                                                                                                                                                                                                                                                                                                                                                                                                                                                                                                                                                                                                                                                                                                                                                                                                                                                                                                                                                                                                                                                                                                                                                                                                                                                                                                                                                                                                                                                                                                                                                                                                                                                                                                                                                                                                                                                                                                                                                                                                                                                                                                                                                                                                                                                                                                                                                                                                                                                                                                                                                                                                                                                                                                                                                                                                                                                                                                                                                                                                                                                                                                                                                                                                                                                                                                                                                                                                                                                                                                                                                                                                                                                                                                                                                                                                                                                                                                                                                                                                                                                                                                                                                                                                                                                                                                                                                                                                                                                                                                                                                                                                                                                                                                                                                                                                   |
|--|--|-------------------------------------------------------------------------------------------------------------------------------------------------------------------------------------------------------------------------------------------------------------------------------------------------------------------------------------------------------------------------------------------------------------------------------------------------------------------------------------------------------------------------------------------------------------------------------------------------------------------------------------------------------------------------------------------------------------------------------------------------------------------------------------------------------------------------------------------------------------------------------------------------------------------------------------------------------------------------------------------------------------------------------------------------------------------------------------------------------------------------------------------------------------------------------------------------------------------------------------------------------------------------------------------------------------------------------------------------------------------------------------------------------------------------------------------------------------------------------------------------------------------------------------------------------------------------------------------------------------------------------------------------------------------------------------------------------------------------------------------------------------------------------------------------------------------------------------------------------------------------------------------------------------------------------------------------------------------------------------------------------------------------------------------------------------------------------------------------------------------------------------------------------------------------------------------------------------------------------------------------------------------------------------------------------------------------------------------------------------------------------------------------------------------------------------------------------------------------------------------------------------------------------------------------------------------------------------------------------------------------------------------------------------------------------------------------------------------------------------------------------------------------------------------------------------------------------------------------------------------------------------------------------------------------------------------------------------------------------------------------------------------------------------------------------------------------------------------------------------------------------------------------------------------------------------------------------------------------------------------------------------------------------------------------------------------------------------------------------------------------------------------------------------------------------------------------------------------------------------------------------------------------------------------------------------------------------------------------------------------------------------------------------------------------------------------------------------------------------------------------------------------------------------------------------------------------------------------------------------------------------------------------------------------------------------------------------------------------------------------------------------------------------------------------------------------------------------------------------------------------------------------------------------------------------------------------------------------------------------------------------------------------------------------------------------------------------------------------------------------------------------------------------------------------------------------------------------------------------------------------------------------------------------------------------------------------------------------------------------------------------------------------------------------------------------------------------------------------------------------------------------------------------------------------------------------------------------------------------------------------------------------------------------------------------------------------------------------------------------------------------------------------------------------------------------------------------------------------------------------------------------------------------------------------------------------------------------------------------------------------------------------------------------------------------------------------------------------------------------------------------------------------------------------------------------------------------------------------------------------------------------------------------------------------------------------------------------------------------------------------------------------------------------------------------------------------------------------------------------------------------------------------------------------------------------------------------------------------------------------------------------------------------------------------------------------------------------------------------------------------------------------------------------------------------------------------------------------------------------------------------------------------------------------------------------------------------------------------------------------------------------------------------------------------------------------------------------------------------------------------------------------------------------------------------------------------------------------------------------------------------------------|
|  |  | <p> ZSCAN30 OR4C46 ABL2 DIP2C PSMA1 MAP3K5 NOS1 ARPP21 ACACA ABCG1 RGS3 MAML2 SPAG16<br/> EML1 RERG HTR2C CCDC141 NEK4 CACNA1E SPATA17 CTIF CNTN4 TBC1D5 MUC16 CSTF3<br/> CEACAM22P SAMD13 LINC00511 RNF17 PRAMEF26 SLC40A1 SLC03A1 GABRR2 PIK3C3 SLC9C1 TRAF3<br/> SND1 MPPED1 SNAP25-AS1 CHD6 HMCN1 ZFAND4 FGD4 ETS2 GOLGA6D ITGA1 TCF12 ZNF721<br/> VNIR7P KTN1-AS1 HIRA CORO2B POC5 ITGA8 GRIK4 RBM19 RUNX1 KIR3DL2 FEMIAP1 ALDH1A2<br/> GABRG1 TSHZ2 MAPK9 ESRRG PTGFR IGHV10R21-1 FAR2 FAM171A1 CNN2P12 ZNF595 CDH17<br/> NLRP13 SV2B PEAK1 EYA1 ADAMTS19 KIAA1217 MORC3 ANKS1B CDH18 P2RX6 HSF2BP AKAP10<br/> SPOCK3 FRMD6 PLS1 UNC79 SPON1 ANK2 PLA2G4A SLC1A2 ZBTB16 STXBP5-AS1 ANO2 SUPT3H SLIT3<br/> BAGE2 GRIN2B ZNF518A IGLV3-31 PHC2 ROBO1 ZNF578 ANKRD30BL ANKRD11 EGFLAM PLD5<br/> RABGAP1 PAK3 DGKB GARNL3 PWRN1 DPH6 EBF1 TNKS KLF12 NDFIP2 AQR GABRA2 ANKRD36BP2<br/> MDM1 SMPX OVOL2 CSEIL C1orf87 PRUNE2 FCHSD2 SGMS1 HERC2P4 LINC01122 ITPR2 BRINP1<br/> C8orf34 LINC00158 MLLT3 BCL2L13 IGSF5 DRG1 SOX9-AS1 TRAPPC10 LEMD3 KHDRBS2 CPQ RNF138<br/> CHODL EHP1 GABPA PRICKLE2 PSTPIP2 LINC00861 ITGB3BP CACNA2D3 ZNF831 DGKK TMEM67<br/> PRKCE CNTN3 MGAM GLIS1 PSG9 ARHGEF11 PRKAA2 CD163 PACRG BBS2 ILIRAPL2 CHCHD3 MUC19<br/> EDIL3 KLHL33 CDYL2 LRRTM4 PTPRN2 MYOM2 MYO3A USP31 UBE2R2 HIVEP2 KCNH8 GRIK1 NUBPL<br/> SOX5 PRAMENP KIF6 DSCAM DGK1 RIN3 REG4 UBL3 TBC1D30 ANKFN1 NME7 DNMBP EFHB TRAPPC8<br/> KDM4C ACSM2A DCUN1D4 SDK1 SLC9B1P2 SLC1A1 SLC12A1 MAPKAPK5P1 GRM5 PAMR1 EPHA6<br/> NTN1 CA10 ARAP2 LINC00937 NR5A2 LDB2 IGF1R CYP4Z2P FAR1 SPTB WDR72 SNX30 NLGN1 DNAH9<br/> TMEM260 SHISA9 OR9Q1 SHROOM3 JAM2 ZNF355P SNRPN ALX4 CORIN MSI2 LRRC7 TEX41 LINC00221<br/> PDZRN4 MON2 CNTNAP2 LINC00930 MAP2 LIPE-AS1 AQP4-AS1 KCNIP4 CFTR CAMK1D FLRT2 NALCN-<br/> AS1 EFCAB6 ZNF402P MLLT10 C2CD2 NOSIAP PTPRO LINC00840 ZDHHC14 MSRA SYNPR PCDH9<br/> GLBIL3 NKAIN2 CD96 RBMS3 OFCC1 MATN2 NHSL1 INSR IGHV113-1 COBL MDN1 CTNNAL1<br/> CLEC16A PHF20L1 TTC6 ME3 ITGA9 CYP4A22-AS1 KIAA1328 LINC00298 MTRF1 OVCH1 CATSPER2<br/> CRTAC1 HS6ST3 EGLN3 CUX1 ANK3 CDH12 ZMAT4 MORC2 FRMD6-AS2 SV2C GMDS LHFPL3 CNH3<br/> DOCK3 THSD4 TBCD GPC6 RELN RASGRF2 TRPS1 HS3ST4 MFSN9 ADAMTS5 STK38 ADAMTSL3 EVA1C<br/> SNHG14 AOA1 FBXO32 PHF2P2 MYO18B CDH4 TNF ADCY9 DPP10 OCA2 CELF4 CDKAL1 DAPK1 VAV3<br/> INPP5A ZNF600 SUSD1 VRK1 ZNF678 CNTN6 CLIC6 ACSM2B ZNF420 TTC7B APP GTF2IP2 FBLN5 PUM1<br/> CCDC88A ARNT2 KCTD1 RNL5 SPOCK1 NF1P6 ANKRD20A7P HPSE2 PLCE1 TACC2 ANKRD36B ADAM12<br/> FAM214A PAK1 ATP9B GNAL MTF IGF2BP3 CACNA2D1 ADCK1 HCN1 PPP1R13B TOP3A CHRM5<br/> NSMCE2 ZNF208 FRY LINC00670 CXADR EPS8 GGT2 LRFN5 UTRN GPC5 TENM4 CECR2 PRR16<br/> TSPAN13 GHR DUX4 RIPK4 RASGRF1 RIN2 PRDM16 FRMD5 RNF217 LINC00323 USP7 RBFOX1 MEIS2<br/> KIR2DL4 STARD13 PCDH7 SCP2 KL LRRC4C ALCAM PPP1R9A PDZRN3 AVEN TMEM117 TPTE2P2<br/> ADAMTS16 TASP1 POTEV LINC01090 MICU1 ZZEF1 LTBP1 SLAMF1 RGL1 NKAIN3 BACE2 INO80D<br/> SLC25A21 CLSTN2 MEG8 TTL11 NEBL RARB DIDO1 CCDC18 MYH13 WDR12 TCF4 NAALADL2 FRYL<br/> TIAM1 FOCAD PBX1 FAM126B PHACTR1 MLIP SORCS2 PRIM2 PGM2L1 SLC39A12 LIP1 ASAP2 DISC1<br/> OSBPL10 FMN1 ANKRD20A1 RALGPS1 ARHGAP42 SLC16A1-AS1 CHAF1A PHF21B GUSBP1 ZFPM2<br/> PIEZO2 SLC35F1 VSTM4 FAM66A SVEP1 LINC00113 NTM VTIIA ASAP1 PCBP3 FRMPD4 LMCD1-AS1<br/> COL23A1 EDAR EGF LINC00960 PDGFD FYN FAM3B KCND3 RIMBP2 PRMT8 IFT43 XRCC4 LRBA GAB4<br/> EPAH7 MAP7 FHIT SENP8 NSG2 AGGF1P2 GRIA1 ZNF627 TRABD2B SPIDR NAV2 STK3 ANO10 CNOT7<br/> POTEKP COL19A1 MSR1 PSIP1 AP2B1 USP18 S100B NET1 TOX PCDH15 ESR1 ARHGAP12 GABRG3<br/> KCNN3 SGCZ SEL1L2 PLCXD3 LUZP2 KCNAB1 GRM1 PDE4D CNTN5 LRG1 ERC2 PRKACB GNG2<br/> PDE3A PCDH11X RIMS1 POR L3MBTL4 DOCK4 ATP6V1E1 FRMD4A MCTP2 CERS3 PIGK SLC25A15P4<br/> WVOX PCSK2 HUNK KRTAP19-10P CNKSR2 FUT8 SNX29 SAMD5 EPHB1 SSBP2 CREM LSAMP CTTNBP2<br/> FHOD3 GREB1L PARP8 EFEMP1 ARMC2 TNRC6B PIGB AJAP1 IGSF21 SLC9B1P1 MIPEP ABCC9 SNAP29<br/> GSGL HERC1 DOCK1 MTUS2 DIAPH3 TMEM178B PARP15 FAM126A PRMP7 FLT1 EXT1 EFNA5 CHD9<br/> LINC00536 NXN CDC14B ABCA10 TLN2 C14orf39 HDAC4 ZNF717 STK36 KLHL1 TRPC5 NF1P4 AMFR<br/> PLCB4 MRM1 ATP9A FTO PPF1A2 MYEOV ADAM28 ENOX1 B4GALNT3 SH3BP5 AKAP6 ACSBG1<br/> ANKRD36C CSMD2 SORCS3 VPS37A LINC00571 LINC00299 EML6 POU6F2 TENM3 LINGO2 OPCML<br/> MARK2 DUX4L19 SF11 ATF2 TUSC3 PHACTR2 ZNF72P ZNF880 RBBP8 CCDC91 GRID2 CALN1 ZNF423<br/> LRP2 SEMA6D ZNF573 C2 RALGPS2 NTF3 FER SNRK GLDC TTC29 SUSD4 CAMK4 GALNT14 LINC00466<br/> ANKRD20A17P CELF2 TP53I11 PDXDC1 NTNG1 DDX10 ZNF804B FBXL7 MAPRE2 ARFGAP3 MICU2 ISX<br/> RAD51AP1 SGCD TMEM108 RIC8B GABRB3 TPTE SEZ6L GRM7 SLC39A8 RAPGEF2 NAV3 MX1 PLGRKT<br/> PPA2 IMMP2L ZNF615 MIPOL1 GTF21 DNAH3 ATXN1 PRKCQ SSPN KIRREL3 GABRG2 NUDCD3 CPS1<br/> PRKCH NRXN3 RHPN2 RABGAP1L KRT25 DLC1 PNPLA7 NSG1 ANKRD20A8P GABBR2 KCND2 LY86-AS1<br/> ATP8A2 SNTB1 SLC24A3 UBE3A ORC4 MPRIP GRIA4 IDE CERS6 TPH2 LOXHD1 APC ZBTB25 MACROD2<br/> TTLL5 INO80 TMTC1 MOC52 AUTS2 TFF1 EPHB2 STON1-GTF2A1L SCAF4 SYT16 ADARB2 ERC1 ZNF850<br/> COX10-AS1 PDLIM5 XYL1 AGO3 C9 TMTC2 MCTP1 RNU1-51P MOB3B RYR3 NBAS MTND1P17 PRTG<br/> NBN C12orf42 ADAMTS18 RGM B CTNND2 FRMD3 COL22A1 TC2N SETD2 PACSIN2 PKP1 MIR181A1HG<br/> DOCK2 NUP214 TRIM23 SDCCAG8 FLVCR1 NRP1 CDH13 MDGA2 RFC3 PHACTR3 ADAM5 ANKRD26P1<br/> ZNF879 RPGRIP1 DACH1 TRDN DEFB116 SLC2A13 ZNF397 DAB1 LINC00623 RFTN1 RSU1P1 TEKT4P2<br/> CHODL-AS1 SNTG1 ALK EXOC6B EVC2 GREB1 LDLRAD4 SEMA3A CCDC26 SEMA3E DNAH6 MGAT5<br/> ATP13A3 STOML1 CADM2 MALRD1 MYEF2 DCLK1 MAGI3 IFNG-AS1 ANKRD30BP1 CCDC122 COL21A1<br/> FAM135B MORN1 KIF16B NRIP1 PAXIP1-AS2 CDH2 ARID5B SIPA1L2 CCNG2 RCAN2 LRRC69 TENM2<br/> TANC1 PAPP SERPINB7 EVI5 IGHV17-65-1 VPS41 SYCP1 ZNF407 MIR3118-4 ASB3 HDAC9 C1orf21<br/> ELOVL7 PIK3R3 MAP2K6 FSTL4 ARHGAP28 MTOR STK38L KSR1 RALGAP2 RORB GABRB1 FBLN1<br/> SGSM1 TPTEP1 ST8SIA1 BLM SH3KBP1 FHL2 PSMB2 CADPS NEU3 NCAPG2 RGS7 TPTE2P5 KYNU<br/> STK32A CD2AP ZFP30 TTC39C CLVS2 DIO2-AS1 USP25 SLC44A1 SPRED1 AP5M1 SIPA1L3 ADAM10<br/> GALC MRPS22 DRAM1 TSPAN33 PPP2R2C KANSL1 CES1P2 LRFN2 FLNB WDFY4 SCAI TULP4 PAPP2<br/> NCORIP3 ABCB5 HEATR4 SPECC1 DPY19L2 MTMR10 LINC00559 NEK2P2 PTPRT FAM118A TRIM9<br/> CSMD1 TRERF1 SLC24A2 CENPBD1P1 GLI3 COL25A1 NTRK3 RXFP1 FBN1 SGCG HYDIN CHKA RAB31<br/> CTNNA3 TXNDC16 VPS13D ABHD17C ZNF292 TBX15 PRB3 RAPGEF4 BMPER LINC00922 ANKRD31<br/> ZNF521 PDE1A TMPRSS2 LINC01036 CMAHP ATF7IP DUXAP10 HMGA2 TMPRSS15 MX2 CREB5 THSD7B </p> |
|--|--|-------------------------------------------------------------------------------------------------------------------------------------------------------------------------------------------------------------------------------------------------------------------------------------------------------------------------------------------------------------------------------------------------------------------------------------------------------------------------------------------------------------------------------------------------------------------------------------------------------------------------------------------------------------------------------------------------------------------------------------------------------------------------------------------------------------------------------------------------------------------------------------------------------------------------------------------------------------------------------------------------------------------------------------------------------------------------------------------------------------------------------------------------------------------------------------------------------------------------------------------------------------------------------------------------------------------------------------------------------------------------------------------------------------------------------------------------------------------------------------------------------------------------------------------------------------------------------------------------------------------------------------------------------------------------------------------------------------------------------------------------------------------------------------------------------------------------------------------------------------------------------------------------------------------------------------------------------------------------------------------------------------------------------------------------------------------------------------------------------------------------------------------------------------------------------------------------------------------------------------------------------------------------------------------------------------------------------------------------------------------------------------------------------------------------------------------------------------------------------------------------------------------------------------------------------------------------------------------------------------------------------------------------------------------------------------------------------------------------------------------------------------------------------------------------------------------------------------------------------------------------------------------------------------------------------------------------------------------------------------------------------------------------------------------------------------------------------------------------------------------------------------------------------------------------------------------------------------------------------------------------------------------------------------------------------------------------------------------------------------------------------------------------------------------------------------------------------------------------------------------------------------------------------------------------------------------------------------------------------------------------------------------------------------------------------------------------------------------------------------------------------------------------------------------------------------------------------------------------------------------------------------------------------------------------------------------------------------------------------------------------------------------------------------------------------------------------------------------------------------------------------------------------------------------------------------------------------------------------------------------------------------------------------------------------------------------------------------------------------------------------------------------------------------------------------------------------------------------------------------------------------------------------------------------------------------------------------------------------------------------------------------------------------------------------------------------------------------------------------------------------------------------------------------------------------------------------------------------------------------------------------------------------------------------------------------------------------------------------------------------------------------------------------------------------------------------------------------------------------------------------------------------------------------------------------------------------------------------------------------------------------------------------------------------------------------------------------------------------------------------------------------------------------------------------------------------------------------------------------------------------------------------------------------------------------------------------------------------------------------------------------------------------------------------------------------------------------------------------------------------------------------------------------------------------------------------------------------------------------------------------------------------------------------------------------------------------------------------------------------------------------------------------------------------------------------------------------------------------------------------------------------------------------------------------------------------------------------------------------------------------------------------------------------------------------------------------------------------------------------------------------------------------------------------------------------------------------------------------------------------------------------------|



|      |      |                                                                                                                                                                                                                                                                                                                                                                                                                                                                                                                                                                                                                                                                                                                                                                                                                                                                                                                                                                                                                                                                                                                                                                                                                                                                                                                                                                                                                                                                                                                                                                                                                                                                                                                                                                                                                                                                                                                                                                                                                                                                                                                                                                                                                                                                                                                                                                                                                                                                                                                                                                                                                                                                                                                                                                                                                                                                                                                                                                                                                                                                                                                                                                                                                                                                                                                                                                                                                                                                                                                                                                                                                                                                                                                                                                                                                                                                                                                                                                                                                                                                                                                                                                                                                                                                                                                                                                                                                                                                                                                                                                                                                                                                                                                                                                                                                                                                                                                   |
|------|------|-------------------------------------------------------------------------------------------------------------------------------------------------------------------------------------------------------------------------------------------------------------------------------------------------------------------------------------------------------------------------------------------------------------------------------------------------------------------------------------------------------------------------------------------------------------------------------------------------------------------------------------------------------------------------------------------------------------------------------------------------------------------------------------------------------------------------------------------------------------------------------------------------------------------------------------------------------------------------------------------------------------------------------------------------------------------------------------------------------------------------------------------------------------------------------------------------------------------------------------------------------------------------------------------------------------------------------------------------------------------------------------------------------------------------------------------------------------------------------------------------------------------------------------------------------------------------------------------------------------------------------------------------------------------------------------------------------------------------------------------------------------------------------------------------------------------------------------------------------------------------------------------------------------------------------------------------------------------------------------------------------------------------------------------------------------------------------------------------------------------------------------------------------------------------------------------------------------------------------------------------------------------------------------------------------------------------------------------------------------------------------------------------------------------------------------------------------------------------------------------------------------------------------------------------------------------------------------------------------------------------------------------------------------------------------------------------------------------------------------------------------------------------------------------------------------------------------------------------------------------------------------------------------------------------------------------------------------------------------------------------------------------------------------------------------------------------------------------------------------------------------------------------------------------------------------------------------------------------------------------------------------------------------------------------------------------------------------------------------------------------------------------------------------------------------------------------------------------------------------------------------------------------------------------------------------------------------------------------------------------------------------------------------------------------------------------------------------------------------------------------------------------------------------------------------------------------------------------------------------------------------------------------------------------------------------------------------------------------------------------------------------------------------------------------------------------------------------------------------------------------------------------------------------------------------------------------------------------------------------------------------------------------------------------------------------------------------------------------------------------------------------------------------------------------------------------------------------------------------------------------------------------------------------------------------------------------------------------------------------------------------------------------------------------------------------------------------------------------------------------------------------------------------------------------------------------------------------------------------------------------------------------------------------------|
|      |      | <p>CPA6 NSUN2 DEFA3 PTPRK KIR2DS4 SORCSI TBC1D4 DNM3 SYTI APIP SYNDIG1 ASXL3 DPF3 DHX32 SCAPER CRYBB2P1 NPHP4 DOCK9 DUX4L17 DLG2 PPP1R12B SACS PPARA PLXNA2 SCFD2 PTPRD RORA MYH15 SHISA6 SCARA5 IGKV2OR22-4 LINC00923 PLCB1 LOXL2 AGGF1P1 BPTF RPS10P7 PRKG1 CTBP2P1 RASGRP1 PLXDC2 ELAVL4 CDH9 NLRC5 STXBP6 CYP4ZI WDR25 DMBT1 MXI1 TTC28 MAGI2 NELL1 ANKRD30B STX12 PLCL1 ABI1 HPCAL1 GALNTL6 KIAA1671 PXDNL TSHZ3 ASIC2 RALA DOCK10 GNPTAB TRPM1 CACNG3 CNTNAP3 FNDC3A NECAB1 PRKD1 ATP8A1 TNFAIP8 POT1-AS1 BCL2L1 MICAL3 ADK HDAC2 RANBP17 ETS1 MRPS27 TNN MIR155HG ST6GAL2 RYR2 SEMA3D LDLRAD3 SLX4IP BANP TGFA YME1L1P1 PRLR TBX20 PTPRA FAT3 OR11G2 MTMR2 KCNH5 FAM189A2 TMEM163 MPDZ ATF6 EYS IPO11 IL16 FAM189A1 VCL DEPTOR BACH1 ATAT1 POTEH ROBO2 EWSR1 IFT81 OSCP1 ZMYND11 CDH23 RGS6 SRGAP3 EFCAB2 AKAP13 WDR41 NEDD9 MYRIP SLC39A11 ENPP1 UNC13C PCP4 RIMS2 CCDC171 SLC5A1 C16orf95 STAC SCN8A RAB27A EYA4 RALGAP1 L3MBTL3 DLGAP2 IGKV2OR22-3 ARL15 POMT2 HIVEP3 CLIP1 SEMA5A CABLES1 PRDM15 OR4N2 BCL11A AGAP1 FREM1 DCC ZNF112 CTNNA2 ATE1 CEP44 PVT1 PARD3B CHN1 ETV6 VPS13C KCNJ15 CEP112 PARD3 NRG1 NPL CAST TBC1D9 FANK1 ZNF845 DLEU1 SLC25A48 ATP10B SLC35F4 NPAS3 PRKCA PGPEP1 FMN2 SEMA3C FANCB DPY19L1 CSF2RB KIAA0825 PCNT BCKDHB PAH ST18 FRMD4B OSBPL5 TOP1</p>                                                                                                                                                                                                                                                                                                                                                                                                                                                                                                                                                                                                                                                                                                                                                                                                                                                                                                                                                                                                                                                                                                                                                                                                                                                                                                                                                                                                                                                                                                                                                                                                                                                                                                                                                                                                                                                                                                                                                                                                                                                                                                                                                                                                                                                                                                                                                                                                                                                                                                                                                                                                                                                                                                                                                                                                                                                                                                                                                                                                                                                                                                                                                                                                                                                                                                                                                                                                                                                                                                                                                                                                                       |
| K562 | 2213 | <p>FSTL1 SLMAP FAM219A FARP1 LRRC37A5P FAM153A CCDC116 KLHL13 RPS4XP6 ABCB7 PDCL3 SLC10A7 LDB3 TPI1P1 SLC6A11 MYO9B NOS2 LINC02645 ZEB1 LINC01708 CDK14 LINC01685 FAT4 LRMDA CHD9 FGR EPN2 SLC15A2 MET THRAP3 BANK1 KNDCC1 PRSS51 SLC25A52 LINC02355 HERC2P2 DMC1 GLRA4 OR7A17 LHFPL2 C9orf43 DIP2A NBPFF21P PCAT19 TMC3-AS1 UNC45B LUZP1 LINC01346 ROCK2 SCYGR8 LINC02249 LRGUK ZNF723 FAAHP1 LINC01479 LINC02476 FOXK2 FGGY LINC01138 LINC01620 LINC01915 SMIM35 LINC01782 SMYD3 ANKRD20A4P LGI2 LINC02267 DNAH17 TAF2 STAU2 PGAP4 LINC01387 PGBD5 TIAL1 ROR2 USP14 LINC01163 ST8SIA4 GMPR HYDIN2 GAS2L1 RFX3 CD82 ARL13B LINC02224 TMEM156 SEC14L1 ATP11C SF3B6 LIMD1 XRN2 ADAM32 ASS1 IPP SNX6 CEP120 RN7SL52P FAM204A NCF4-AS1 LINC02122 ATP5PBP3 MYO5C LINC00841 SDC2 USP32 KDM6A MED27 PDYN-AS1 SLC22A14 RBPJP6 UFL1 COX10 CROCC2 EPHA4 PKNOX2-DT LINC01967 AGPS TARID H1-9P KLHL7 ECM1P1 GACAT3 WARS2-AS1 PCSK6 RPRD1B CCDC172 LINC01828 PTPN2 BPLD LINC00486 GORAB GPR1-AS ARMC6 LINC02675 RSU1 MYLK2 ZFH4-AS1 IRAG2 RBM6 PSMF1 GLYATL2 SH3PX2A NRF1 IGHV2-70D OPA3 MOB1B UIMC1 LINC02607 RAB38 RIC3 ZNF738 EXOC1 UPP2 VMP1 NENF HRH2 ATP6AP1L RDX SVIL DEUP1 CADPS2 C5 ANKRD26 ATP2B2 RGS20 HCTR1 RPL37P3 RELL1 ABCC12 LINC02176 EIF3D ADAMTS19-AS1 SNRPC OVCH2 FBXL20 GOLGA8EP COP1P1 POTEJ SHISAL1 SUSDB LINC02133 LINC01427 MYCL RGPD2 LINC01727 SPAG6 IFNAR1 KIAA0319L OPN3 NRAP MAP4K3 XXLYT1 KIAA0753 SPATA48 HHIPL1 NOTCH2 FAM72D FRG1-DT TTC28-AS1 ANP32A CLDN10 USP43 FKBP5 KIAA0232 SRGAP2C FBXO3 TMOD2 BTBD10 MELK YPEL1 ARHGAP26 PTPN4 WSB1 MAP6 LINC00896 MORC1 APOL1 NDC80 AIF1L SCGB1D5P KANK4 CEP72 SGO1 DUX4L2O FAM230C SLC37A1 SUPT16H GAS1RR LINC01213 LINC02668 AUH RALB LINC02234 MOSMO MRPL37 BLK PPP1R17 PSMA5 RESF1 MAPK11P1L FARS2 DPH6-DT PIAS1 CDH20 MAGI2-AS3 ZNF611 NCOA6 LRRFIP1 ZC3H14 MROH5 LINC02180 LINC01483 LINC00662 GALNT10 FHIP2A CFAP74 ZNF846 UBE2QL1 PLPPR5 RNF217-AS1 ZNF287 AVL9 ZFYVE9 FERIL6 WBP2P1 LINC02542 SYN2 ATL1 PTC2D ADGRF5 SERPINB11 QSOX2 NCSTNP1 HFM1 SMG1P5 MCF2L FH STK10 CFAP70 ABCD3 MTF2 GSR CCDC162P FIG4 INTS7 ASB4 GRM3 PRKN GRAMD1B FOXF2 SIAH2 RB1CC1 POLR3A LALBA LINC00375 F13A1 BRCA2 RNU6-1007P ANKMY1 KDM7A APELA UBN1 PLA2G12B ADAM29 CDC27P2 FAR1P1 TMEM182 SP110 KIAA0513 LINC01906 DUX4L34 IL10 LINC02305 LCLAT1 LIFR-AS1 EFL1 BIRC6 OLFM4 SLC6A1 SAMHD1 EPC2 TUT4 SDF4 EFHD2 CXCL2 GNAI1 EGFR GOLGA6B LINC00334 NDRG1 SLC10A6 PTPRQ CARD10 MRPL13 PACS1 BCR SLC49A4 DNPEP TRAPPC11 HOXC4 FANCM NEO1 MELTF MXRA7 LINC01443 NECTIN4 CNMD LINC01309 PDP2 UFD1 ERP27 POTE3 ZBTB21 NGF-AS1 AGL BBS4 MIR99AHG HS6ST1 ITPKB LINC01829 ZBED9 RTRAF IPCEF1 NF1P9 BIN2 TCERG1 FAIM UBE2O RPRD1A LINC01608 PPP2R2A ZNF541 LINC00869 CPEB4 CKMT1A CDC27P3 ABL1 NCOR1 MOCOS LINC02213 PRDM10 CDC45 CWC22 C16orf72 PPP1CB USP33 ERBIN LINC02087 ZNF121 HERC2P9 MBTPS2 MTHFD1L KHDC4 HOATZ LINC00598 IRAG1 HRH1 LINC02223 ZNF705G LINC01684 KRT89P USP41 RBMX2 ZBTB10 PKHD1L1 SOX1-OT MCC CEP192 SLC26A2 PTH GUSBP11 RAB22A FAM66C ROCC ZNF160 SLC9A4 DHX29 HADHB GRXCR1 STPG2 MIDEAS TM9SF2 MAP3K4 LINC02646 LINC02466 INTS13 VSTM2A HEATR6 GNG7 RUNX2 LRP12 FGF10 TAPT1-AS1 LINC01331 JAZF1-AS1 LINC01035 PLEKHA2 LINC01492 ESRP1 RAC1P3 NLRP8 ZMYM4 FRG1JP PLG DUX4L37 SLFN11 MED12L ZDHHC21 BRMS1L ERO1B TM9SF3 CABYR LINC02505 ANK3-DT DDHD1 PPP6R3 CDH7 MFSD14C ACOXL CYCSP39 GUCD1 ILDR2 LINC02492 NCK1 SOHLH1 FRG1FP CDV3P1 LINC01192 DRAIC PUDP FAT1 PATJ ITCB MBP TANGO6 SOSTDC1 CELSR2 CFAP97 EBNA1BP2 SLC46A3 PTPRJ TET1 SEC24B-AS1 KCNQ3 ANKRD33B SNX8 HADHA MRPL58 CCBE1 SELENON CNIH1 FRG1BP TMEM232 CLCA4-AS1 MAPKBP1 UTR LINC02613 BTB NSMAF PYGO1 CDIN1 NFKBIA TYW1 HSF5 ALB CD101 JPH1 ANKRD20A3P GSE1 EFR3A FHIPIA UBAP2 SCN10A NCOA7 ANKRD18A MDS2 ANKRD7 LINC01622 NARS2 MARCHF1 OR4L1 PTCSC2 ABCC8 LINC00539 NOXRED1 BNC2 TTC33 C9orf92 MCPH1 MINAR1 MYO1D HSD17B14 EIPR1 BMP2K LINC01707 LINC02543 HNRNPU CHCHD2 CCDC126 LINC02366 GOLGA6L17P BABAM2 TWIST1 LINC02653 GEMIN5 IL1R1 RPL15P3 TRIM77BP KTN1 PASK HEPACAM USP8 MRTFB XPO7 ARSJ LINC02006 VWA3B LINC01801 LINC01320 LYPLAL1 ALPL STEAP2-AS1 CHST3 MAP3K9 ABLIM1 BTAFL COLQ PDCD6IPP2 NYAP2 LINC02660 HNRNPCP9 RFX2 MAPK8IP1 CHRNA7 SLC66A1L LYPLAL1-DT ACTR2 HMGB1 MEF2C FOXO1B MYB ARPC3P2 ST8SIA5 TBC1D19 RPTOR CLCN3P1 MAP4 ZNRFP2P2 HIVEP1 TNIK COX5A LINC02252 SEC24D MPPED2 MDFIC EPB41L4A WNK2 PCMTD2 MBNL2 LINC02226 STARD4-AS1 TUBGCP3 KIF7 SDAD1P2 ITIH5 LGALS9DP HOXC13 HCP5 ECHDC1 SMARCC1 AMBRA1 STX18-AS1 DOP1B FAM66D LINC02063 LINC00355 FBXW8 SLC9A5 LINC02465 MUSK KCNJ18 ECPAS LINC00583 SFPQ IL21-AS1 RNU6-835P PTPN12 GPR137B LINC00434 LINC02424 RXRA TOP3B LINC01649 STAG2 HTR5BP ARL11 UBA6-DT ARHGEF12 LYPLA1 LNPEP DDX39BP1 UNC93B3 RPS3AP6 CDK12 ANKRD10 GALNT13 NEDD4 YTHDF3 SYT10 PEX14 SEPTIN6 ZBTB38 PAFAH1B1 CFAP61 LINC02380 FYCO1 HRH4 DOCK8 LRRC38 CNKSR3 LINC01340 ZNF648 DRAXIN LINC02058 TRNAU1AP LINC02145</p> |

|  |  |                                                                                                                                                                                                                                                                                                                                                                                                                                                                                                                                                                                                                                                                                                                                                                                                                                                                                                                                                                                                                                                                                                                                                                                                                                                                                                                                                                                                                                                                                                                                                                                                                                                                                                                                                                                                                                                                                                                                                                                                                                                                                                                                                                                                                                                                                                                                                                                                                                                                                                                                                                                                                                                                                                                                                                                                                                                                                                                                                                                                                                                                                                                                                                                                                                                                                                                                                                                                                                                                                                                                                                                                                                                                                                                                                                                                                                                                                                                                                                                                                                                                                                                                                                                                                                                                                                                                                                                                                                                                                                                                                                                                                                                                                                                                                                                                                                                                                                                                                                                                                                                                                                                                                                                                                                                                                                                                                                                                                                                                                                                                                                                                                                                                                                                                                                                                                                                                                                                                                                                                                                                                                                                                                                                                                                                                                                                                                                                                                                                                                                                           |
|--|--|---------------------------------------------------------------------------------------------------------------------------------------------------------------------------------------------------------------------------------------------------------------------------------------------------------------------------------------------------------------------------------------------------------------------------------------------------------------------------------------------------------------------------------------------------------------------------------------------------------------------------------------------------------------------------------------------------------------------------------------------------------------------------------------------------------------------------------------------------------------------------------------------------------------------------------------------------------------------------------------------------------------------------------------------------------------------------------------------------------------------------------------------------------------------------------------------------------------------------------------------------------------------------------------------------------------------------------------------------------------------------------------------------------------------------------------------------------------------------------------------------------------------------------------------------------------------------------------------------------------------------------------------------------------------------------------------------------------------------------------------------------------------------------------------------------------------------------------------------------------------------------------------------------------------------------------------------------------------------------------------------------------------------------------------------------------------------------------------------------------------------------------------------------------------------------------------------------------------------------------------------------------------------------------------------------------------------------------------------------------------------------------------------------------------------------------------------------------------------------------------------------------------------------------------------------------------------------------------------------------------------------------------------------------------------------------------------------------------------------------------------------------------------------------------------------------------------------------------------------------------------------------------------------------------------------------------------------------------------------------------------------------------------------------------------------------------------------------------------------------------------------------------------------------------------------------------------------------------------------------------------------------------------------------------------------------------------------------------------------------------------------------------------------------------------------------------------------------------------------------------------------------------------------------------------------------------------------------------------------------------------------------------------------------------------------------------------------------------------------------------------------------------------------------------------------------------------------------------------------------------------------------------------------------------------------------------------------------------------------------------------------------------------------------------------------------------------------------------------------------------------------------------------------------------------------------------------------------------------------------------------------------------------------------------------------------------------------------------------------------------------------------------------------------------------------------------------------------------------------------------------------------------------------------------------------------------------------------------------------------------------------------------------------------------------------------------------------------------------------------------------------------------------------------------------------------------------------------------------------------------------------------------------------------------------------------------------------------------------------------------------------------------------------------------------------------------------------------------------------------------------------------------------------------------------------------------------------------------------------------------------------------------------------------------------------------------------------------------------------------------------------------------------------------------------------------------------------------------------------------------------------------------------------------------------------------------------------------------------------------------------------------------------------------------------------------------------------------------------------------------------------------------------------------------------------------------------------------------------------------------------------------------------------------------------------------------------------------------------------------------------------------------------------------------------------------------------------------------------------------------------------------------------------------------------------------------------------------------------------------------------------------------------------------------------------------------------------------------------------------------------------------------------------------------------------------------------------------------------------------------------------------------------|
|  |  | <p> ARFGEF3 KIF11 LINC02400 PHC3 TMC05A CCSE1 FANCL SH3GLB1 LINC02237 OTULINL SCML2<br/> ANKRD28 LINC00701 GRK3 ZBTB2 ZMYND8 CCDC186 GSAP EFTUD2 LINC01695 ZNF382 ACTR3BP1<br/> NDUF6F6 LINC01412 INTS8 ERMP1 ARL4C CIBAR1 ATG4B ADGRL2 GAGE13 OSER1-DT KIFC1 TRPC7<br/> NPSR1-AS1 COL4A3 MYO10 LINC02693 TMEM74 PRKAA1 ENAH TENM3-AS1 GAGE12J TAF4A POGK<br/> CROT LINC00862 STON2 MIR3681HG IREB2 STOX2 LINC02458 ABCC4 PLAGL1 FRG1HP ABCD2 DNAJC7<br/> RRAS2 RPL5P35 ERN2 HECW2 NRBP1 CYP2C58P ZNF679 TLNRD1 SEC14L3 SERPINB2 GTF2F2 AOX3P<br/> SOX30 TMEM132C KRTAP19-7 TTLL7 EFCAB14 PLEKHA3 WWC1 CPSF3 NF1P7 SH3GL3 SENP6<br/> MIR100HG LARP1 INVS SUMO3 LNP1 KIF21A UNK LINC01938 PHF19 XKR5 ADAMTS14 ZNF875<br/> LINC02191 DCAF1 SYNJ2 ARSB PARBP IL34 SIGLEC29P DPYSL5 AGK EBF3 CEP83 NFKBID ATXN3<br/> CIDEA CFAP299 LINC01924 OXR1 LINC01033 SFMBT2 RNU6-1150P NP1PA1 OB11-AS1 OR2T2 MADD<br/> PCID2 LTNI LINC00667 TINAG AXDND1 ZSWIM6 MYL1 KLHL4 MTREX CD9 EIF3F TOM1 CAMK1G<br/> LINC02327 FAM30A PDZPH1P RNU6-113P CFAP418-AS1 WDR64 GOLGA8S PRKAG2 IGLV2-34<br/> LINC02540 MTND2P8 RPL23AP7 JAZF1 WASF3 MTUS1 GABRA6 CCDC192 PTPRVP MGMT BUB1<br/> BNIP3P41 PANTR1 KRTAP21-2 LASP1 KRT6A VPS35L GGT4P LCE3B SKA1 PALS2 ADCY10 SCGB2B2<br/> LINC01692 LINC02165 PTARI DSG1-AS1 LINC02091 TRIM58 NAA35 ATP5PF KLHL32 ZMYM1 UBAP1L<br/> MVB12B ZCCHC14 AGGF1P10 C4orf50 LINC02253 UBASH3A ELOC LINC01588 PRAMEF2 ENTPD5 CUL1<br/> SLC7A2 PKN2 C16orf74 AGO1 GLYATL1 AGAP14P PRDM11 ODAD2 ETNPPL ARMC3 IGLV3-27<br/> LINC01128 GRB10 PARGP1 LAT52 LINC02141 AOPEP APCDD1L-DT DNMT3L CBLIF ATP6V1B2 TERB2<br/> LINC01602 TTR PSAP NCS1 RANBP3L ONECUT1 MARK2P12 LYN ADGRB3 INPP4B PCDH11Y HGD<br/> SUMO2 SDCBP TASOR2 CUL5 MICOS10 LINC01221 LINC00363 DIP2B LINC01151 CD5L IGLV2-14<br/> LINC01189 TFDPI LINC00383 ZNF876P LINC02464 LCE3D MIR9-1HG PPMEI TNPO3 LARGE HTT<br/> MBNL1 TPGS2 DAZL FUT9 LINC02291 MOK TBC1D1 IQGAP1 TUBB6 CCDC195 TMC04 LINC02098<br/> BAZ2A FAM27C RPS12 MED1 DDX6 LINC02328 ANKRD20A21P DIAPH1 COMMD10 COG5 COP8<br/> SACM1L AKAP9 MIR3197 LINC02008 IQSEC1 PIGN PAQR5 DBF4B LINC02236 CCL28 MRTFA FAM241A<br/> LINC00838 PRSS23 WNT2B PPM1L CPHLIP POLD1 CASZ1 LRRC37A3 PAK5 SETDB2 ECT3 FAH OR51E1<br/> RABEP1 TMEM116 NR2F1-AS1 ZNF705B NUTM2HP FRG1CP ALKAL2 VSX1 ZNF280B GOLGA8F NFATC2<br/> TNRC6C LINC02663 PRAMEF25 LINC02451 KRTAP20-4 ARHGAP44 ZNF970P MTCL1 RPL23AP87<br/> GOLGA6C BAZ1A ARID3B ZFAND3 TCERG1L C6orf118 FAM83F RAB12 ITFG1 LINC02235 C21orf62-AS1<br/> EXOC1L XKR6 CYP2C8 PKN2-AS1 LINC02649 DOCK5 ABCA9-AS1 C7orf31 MAGEL2 SRFBP1 COPI1<br/> MIR646HG IL33 SGO1-AS1 DTHD1 MARK4 CRACR2A CFAP20DC HAAO CIBAR1-DT LINC01901<br/> ATP6VOD2 OR2T3 SYNJ1 SERPINB10 ACTN1-DT KLF15 HLA-B PPP2R2B ARHGEF17 LINC02196 ZNF431<br/> CACYBP IL12A-AS1 CATSPERE ANKRD66 ULK2 LYRM4 RPL23AP49 LINC02099 ZNF462 HNRNP3P1<br/> UGP2 TMEM44-AS1 FAM25G SHROOM2 PABPC1 RP1L1 PPM1F OR4K8P ZFH3S EFCAB6-AS1 RRAGD<br/> RPSAP68 ST13 GPRI56 MARCHF8 RGPD8 SHC4 LINC02112 FCRLA THEM7P LINC01937 ZNF613 DEFA8P<br/> PSMA8 GOLGA8T KITLG KRT6B AKR1C3 PPP2R5E ASB7 COL5A1 LINC01426 IFT57 IL20RB ADAM22<br/> RABL2A LINC02582 MAP4K4 FICD FEZ2 KIF21B WNT5B PEG10 INHBA-AS1 PRAME LARS2 HULC<br/> LINC01414 APLF HIP1 OLA1 WNT9B RFX7 ADGRV1 MFHAS1 LINC02662 ANKRD55 SERBP1 SKINT1L<br/> EOGT LINC02254 ADD3-AS1 NF2 CRISPLD2 DMAC1 ANTXRPL1 MTMR3 FAM25C CRKL ANP32B<br/> FAM90A28P AP4E1 ITPRIIP H2BC15 SCG5 NDFIP1 LINC00581 NDC1 TUBB2BP1 PTPN13 SNAP91<br/> LINC02074 ST8SIA6 LINC01908 CDH5 TRAV8-6 LINC01362 A2MP1 LINC02406 UBBP4 BHLHE40-AS1<br/> LINC00895 UBE2Q2P1 BTG3 ATP2B1 CMTM7 SMAD5 PPIL6 PATL1 LINC02255 ATRN OR4F6 CNOT6L<br/> UGT3A2 TRAPPC6B ZNHIT6 RNGTT CDCA8 WDSUB1 PITX1-AS1 ARHGAP5-AS1 FGF7P3 ZNF684 APOL2<br/> COX7A2L AKAIN1 RNF38 FYB2 AHDC1 LINC02073 HERPUD2 CUBN CRTAM SLC52A1 HSD17B2 UBE2G1<br/> PELI2 B9D1 KIRREL1 LINC01467 PEBP4 MIR548H4 CRACDL LINC01491 MRPL45 LINC02664 TTC37<br/> RN7SL483P RCL1 MIR4435-2HG OAZ2 ZNF718 DKK2 SPPL2B TANGO2 OR7E19P HERC2 RIKO1<br/> DNAJC27-AS1 PUM3 ZNF66 HOOK3 BVES-AS1 LINC02563 CCDC106 ANLN SLC1A7 GNAS MKNK1<br/> ADGRE3 DYSF NPM1P2 SERPINB9 LINC01876 TMEM63C LAIR1 GTF2IP4 MSH6 HECTD2 LINC01410<br/> KATNIP PDE6C FRRS1 ADGRE4P IQCM PTK2 TRIM2 DGLUCY MFSD11 PLIN2 IGLV3-2 SPPL3 CARMIL1<br/> FAM167B LINC02558 DENND1A ABHD2 RACGAP1 MIR3667HG NUP37 ERLIN2 SAA3P LINC02250<br/> KCNK15-AS1 TDRD5 NIPBL GOLGA6L3 ATPSCKMT FRA10AC1 FOXB1 HHLA2 UQCC1 C3orf52 SHOC1<br/> MBD5 FAAP24 KDM5A ATF1 MIR548XH3G SAMD12-AS1 RGPD5 GDAP1L1 LINC02096 LINC01358 C12orf4<br/> LINC01579 PLA2R1 LYSMD2 NGDN ADAMTS2 PJA2 TRPV5 SMG1P2 GALNT18 GTSF1L AURKA<br/> LINC01145 GPRC5C COLCA1 AP3B1 CPAMD8 RNU6-929P STMP1 UBL7 ERICH5 ASH1L CALM1P2<br/> BCAP29 TTC21B SLC5A4-AS1 NEK6 MEGF10 ECE1 OR13C9 LINC01445 YIPF6 SEMA3F-AS1 TMEM25<br/> DZANK1 CLTCL1 NUA1 ZNF891 SLC25A18 RNU2-47P SNTG2 CTSB BCRP2 CCDC77 IGLC3 FANCA<br/> LINC02306 CHAMP1 LINC02325 ZNF354C GALNT17 LRRC2 NSD1 NEDD4L HDGFL3 CNPD2 CCNYL3<br/> AGO2 CREBBP CFAP44 PARK7 DSTYK BRINP3 LINC01237 ZNF271P C2orf69P4 LINC01498 DRC7<br/> DISC1FP1 LINC00240 DSE LINC02346 ANTXR1 BARD1 LINC02256 RGS8 PDE4DIP1 BMP7 LHFPL6<br/> GALNT2 ANKRD17 CYP2C9 EPHX4 IMPACT ITGA6 CA5A IMPA2 PSMD2 ZFP90 LINC02641 BMP2 LAMC3<br/> LINC02011 FAM107B ANAPC1 SH2D3C LINC02240 IBA57 LINC02147 RBPJP2 ITGB8 GAP43 LINC02422<br/> OR4K3 PRDM13 LINC01226 GXYLT2 HIPK3 BCAR3 TMEM225 SREBF2 MAIP1 OR10H2 ZNF780B<br/> LINC01900 GAST UBE2L3 SAR1A BCL11B LINC01814 LINC01993 LMX1A RSPH3 CHIT1 TSPAN2 ZFAND6<br/> TMEM178A NUF2 CKMT2-AS1 OR52B3P ASAH2B INTS12 GFRA2 NEK10 ZNF74 STAT1 POLR2M SLC44A3-<br/> AS1 COLEC12 CDCA5 ZNF705CP MYOCD RPH3A PRDM1 HAGLR LINC01088 ZNF215 RERE ALS2 ZNF33B<br/> ZNF608 COMMD8 CYTH4 TBATA MYO1E LINC01681 HDAC2-AS2 SAXO1 LINC01098 RWDD2B BBOX1-<br/> AS1 PLPP4 PWRN4 CCDC102B NPAS2 SDS LINC01571 UBRI COL5A3 SOGA1 COL4A2 ME2 ARHGAP32<br/> SLC27A6 NECTIN1 TMED3 GAREM1 ZNF528 LINC01222 ZNF44 ADA2 PRKCZ FOXJ3 CENPE CNTLN<br/> BPNT1 MYL12B RSPH14 IL17RD ALG10B HCG22 SSBP3 HECTD1 CYP4F22 LINC01182 NGEF GNAI2P1<br/> FAM102A LINC01566 PRSS2 MAPK1 ZNF705D OARD1 POSTN LINC00476 SEM1 DMXL2 SEMA6A-AS2<br/> MOGAT3 TMEM236 MS4A4A TNFSF11 SPOP CASC15 LINC01473 RFPL3S SPRY4-AS1 SNX9 GCSAML<br/> ARHGEF28 RAB3GAP2 IGHV3-62 SLC37A2 ATP1A1-AS1 CRYZL2P-SEC16B BAZ2B CRACD CEMIP CTSE<br/> LINC00877 VENTX DIRC3 MAPK8 ESS2 PHAF1 AK6P2 PLCZ1 ESCO1 PIDI RFC1 COL6A5 ZFYVE28 </p> |
|--|--|---------------------------------------------------------------------------------------------------------------------------------------------------------------------------------------------------------------------------------------------------------------------------------------------------------------------------------------------------------------------------------------------------------------------------------------------------------------------------------------------------------------------------------------------------------------------------------------------------------------------------------------------------------------------------------------------------------------------------------------------------------------------------------------------------------------------------------------------------------------------------------------------------------------------------------------------------------------------------------------------------------------------------------------------------------------------------------------------------------------------------------------------------------------------------------------------------------------------------------------------------------------------------------------------------------------------------------------------------------------------------------------------------------------------------------------------------------------------------------------------------------------------------------------------------------------------------------------------------------------------------------------------------------------------------------------------------------------------------------------------------------------------------------------------------------------------------------------------------------------------------------------------------------------------------------------------------------------------------------------------------------------------------------------------------------------------------------------------------------------------------------------------------------------------------------------------------------------------------------------------------------------------------------------------------------------------------------------------------------------------------------------------------------------------------------------------------------------------------------------------------------------------------------------------------------------------------------------------------------------------------------------------------------------------------------------------------------------------------------------------------------------------------------------------------------------------------------------------------------------------------------------------------------------------------------------------------------------------------------------------------------------------------------------------------------------------------------------------------------------------------------------------------------------------------------------------------------------------------------------------------------------------------------------------------------------------------------------------------------------------------------------------------------------------------------------------------------------------------------------------------------------------------------------------------------------------------------------------------------------------------------------------------------------------------------------------------------------------------------------------------------------------------------------------------------------------------------------------------------------------------------------------------------------------------------------------------------------------------------------------------------------------------------------------------------------------------------------------------------------------------------------------------------------------------------------------------------------------------------------------------------------------------------------------------------------------------------------------------------------------------------------------------------------------------------------------------------------------------------------------------------------------------------------------------------------------------------------------------------------------------------------------------------------------------------------------------------------------------------------------------------------------------------------------------------------------------------------------------------------------------------------------------------------------------------------------------------------------------------------------------------------------------------------------------------------------------------------------------------------------------------------------------------------------------------------------------------------------------------------------------------------------------------------------------------------------------------------------------------------------------------------------------------------------------------------------------------------------------------------------------------------------------------------------------------------------------------------------------------------------------------------------------------------------------------------------------------------------------------------------------------------------------------------------------------------------------------------------------------------------------------------------------------------------------------------------------------------------------------------------------------------------------------------------------------------------------------------------------------------------------------------------------------------------------------------------------------------------------------------------------------------------------------------------------------------------------------------------------------------------------------------------------------------------------------------------------------------------------------------------------------------------------|

|         |      |                                                                                                                                                                                                                                                                                                                                                                                                                                                                                                                                                                                                                                                                                                                                                                                                                                                                                                                                                                                                                                                                                                                                                                                                                                                                                                                                                                                                                                                                                                                                                                                                                                                                                                                                                                                                                                                                                                                                                                                                                                                                                                                                                                                                                                                                                                                                                                                                                                                                                                                                                                                                                                                                                                                                                                                                                                                                                                                                                                                                                                                                                                                                                                                                                                                                                                                                                                                                                                                                                                                                                                                                                                                                                                                                                                                                                                                                                                                                                                                                                                                                                                                                                                                                                                                                                                                                                                                                                                                                                                                                                                                                                                                                                                                                                                                                                                                                                                                                                                                                                                                                                                                                                                                                                                                                                                                                                                                                                                                                                                                                                                                                                                                                                                                                                         |
|---------|------|---------------------------------------------------------------------------------------------------------------------------------------------------------------------------------------------------------------------------------------------------------------------------------------------------------------------------------------------------------------------------------------------------------------------------------------------------------------------------------------------------------------------------------------------------------------------------------------------------------------------------------------------------------------------------------------------------------------------------------------------------------------------------------------------------------------------------------------------------------------------------------------------------------------------------------------------------------------------------------------------------------------------------------------------------------------------------------------------------------------------------------------------------------------------------------------------------------------------------------------------------------------------------------------------------------------------------------------------------------------------------------------------------------------------------------------------------------------------------------------------------------------------------------------------------------------------------------------------------------------------------------------------------------------------------------------------------------------------------------------------------------------------------------------------------------------------------------------------------------------------------------------------------------------------------------------------------------------------------------------------------------------------------------------------------------------------------------------------------------------------------------------------------------------------------------------------------------------------------------------------------------------------------------------------------------------------------------------------------------------------------------------------------------------------------------------------------------------------------------------------------------------------------------------------------------------------------------------------------------------------------------------------------------------------------------------------------------------------------------------------------------------------------------------------------------------------------------------------------------------------------------------------------------------------------------------------------------------------------------------------------------------------------------------------------------------------------------------------------------------------------------------------------------------------------------------------------------------------------------------------------------------------------------------------------------------------------------------------------------------------------------------------------------------------------------------------------------------------------------------------------------------------------------------------------------------------------------------------------------------------------------------------------------------------------------------------------------------------------------------------------------------------------------------------------------------------------------------------------------------------------------------------------------------------------------------------------------------------------------------------------------------------------------------------------------------------------------------------------------------------------------------------------------------------------------------------------------------------------------------------------------------------------------------------------------------------------------------------------------------------------------------------------------------------------------------------------------------------------------------------------------------------------------------------------------------------------------------------------------------------------------------------------------------------------------------------------------------------------------------------------------------------------------------------------------------------------------------------------------------------------------------------------------------------------------------------------------------------------------------------------------------------------------------------------------------------------------------------------------------------------------------------------------------------------------------------------------------------------------------------------------------------------------------------------------------------------------------------------------------------------------------------------------------------------------------------------------------------------------------------------------------------------------------------------------------------------------------------------------------------------------------------------------------------------------------------------------------------------------------------------------|
|         |      | <p> NSUN6 LINC02174 EBF2 TMEM38B DNAJC21 AKR1B1 MMP26 RNY4 PCMTD1 OR6C75 EXTL3 EHMT1<br/> PI4K2B ZNF735 FAM72A IL17RA PLPPR1 CLPX H2ACPI OR7H1P NSMCE1 REPS1 CD70 SH2D1B ZNF606<br/> LRRC8B CSNK1G1 ZNF169 KIF13A KRT18P59 NLRP4 RC3H2 SMTN TWIST2 RNU6-374P SCG3 TNNI1<br/> TAF3 SP3 ZNF106 NR2C1 ADAMTS3 LINC01476 GLI2 CLSPN ICA1 PLEKHD1 EMILIN2 TLDC2 ZNF438<br/> HORMAD2-AS1 VASP UNC80 SDE2 UPRT SPSB4 PPIP5K2 FRG1GP PALD1 C15orf32 KDM1B SPSB1 F5<br/> NUP50-DT S100BPB MESD CDKN2C TRAK1 STXBP1 FAM66B LINC00836 ANKRD30A NMU DENND2B<br/> LINC00603 LINC00944 RPS3AP4 LINC00114 C2orf69P3 LINC01500 MANBA GFRA1 SHLD2 SPHKAP RMST<br/> ECT2L TDRD7 ELP2 RNF8 MIR663AHG LINC01543 DEDD2 DNM1L LINC01723 DNAL1 TEX29 TAF15<br/> TRAPPC3 TARS3 PFKFB4 LINC02910 RNF11 HMCN2 HTR2A IGLV10-54 LINC01204 HSDL2 EIF4BP3<br/> ZNF350-AS1 ZC3H15 CCDC152 LINC01135 GOLGA8G GALNT1 SNAPC3 MARCHF11 CIB4 AKAP11<br/> RBM15-AS1 NRK NAT1 KICS2 CYBRD1 PPP2R3A KRT16P6 COL27A1 CYFIP2 BMP5 APOOP5 CRYBG1<br/> HACD2 MSANTD4 LINC02061 BCAS3 TMC7 FBXL13 OTOG ERCC6L2 RUFY2 SLC16A1 RANBP9 FAM245A<br/> NUDT21 LINC01344 ENPP3 ZNF235 LINC02228 HSPA12A KRTAP21-3 RGPD6 BRWD1 THNSL2 LINC01674<br/> SLC6A3 TMEM54 PPIP5K1 EYA2 ADGRB1 ADGRE1 LINC01837 UCK2 TET1P1 ACTR3C TSPAN11 PDE6A<br/> LINC00643 KRT18P55 OR1L6 MGAM2 SLC17A1 OR2T7 KMT2E DNAH14 MAST2 ERI1 DELEC1 MRPS35<br/> RBFOX3 PWWP3A UTP4 BTLA SEC23B TRGJ1 SYNE2 CLEC20A NETO2 GTF2IP6 LINC01416 SERPINA6<br/> ASCL3 FABP7 IFT46 NUP210L GK AK3 ALPK3 LMNTD1 LINC02343 RAB8B RC3H1 LUCAT1 MAB21L3<br/> NSD2 SMPD4 MTCO2P3 LINC00469 SVIL2P ZYG11A CGAS GRM8 SLC23A2 ARHGGEF7 LINS4 MPPE1<br/> SLC44A2 LINC01592 ZNF704 TRIM43B SAMD12 MAN2A2 CMIP LINC02198 LINC01117 C1QL3 MPP7<br/> POU1F1 FBN2 KIAA1958 CARD18 LPGAT1 FOLH1 MAPKAP1 SPRR2D CYFIP1 LINC00906 PCMT1 GON4L<br/> LINC01019 AFG3L2 ARNT LINC00929 USP49 EIF2B3 CSF1 LINC02109 SLC2A3 HAS2-AS1 FAM72B<br/> MYO5B USP24 UHRF2 SDR42E1 EPCAM-DT CSDE1 LINC01581 RAPIGAP DEFTIP RAD9A RNF215<br/> SPOPL ADAMTS9 RAI14 LINC01664 TMEM273 APMAP HAUS6 CFH LINC00649 PTPRB MARCHF6<br/> CATSPERG ITS2 LINC01917 ODR4 DHX40 ANKS6 DTX1 GF11B RASGEF1C TRIM43 FOXO6 MTPP<br/> FBXW2 TOM1L2 METTL15 LINC02652 LINC01229 FOXJ2 AGAP9 KIAA1549L MYT1 HECTD4 BICRAL<br/> NEK7 NKG7 EMP1 TMEM171 ACTR3BP7 COG2 ZC3HAV1 LNCAROD CCDC138 FAM110A NBPFI<br/> LINC00314 TXNRD2 FAM245B LINC01322 RAB27B ZNF236 LINC01337 MYOF RPI LUC7L LINC01266<br/> LYST DEFB103A SLC16A9 RSRP1 CCR2 RSPH1 NALCN CFHR4 GATAD1 SNRPDI LPCAT2 BZW1<br/> DDX39AP1 LINC01477 PCNA B4GALT6 ATG5 TRIM60P19 SGTB SCGN SRGAP2 ZCCHC7 AK9 MYLK4<br/> ZNF234 LINC02680 CWC27 ZNF124 TAF45 ASCC2 CNM4 MYO5A SPEN NAP1L4 TMC1 CAMLG WASHC1<br/> CDH26 TPM1 LINGO1 LINC01667 CIDEA CRIM1 SEPTIN9 LINC01706 DHTKD1 SMPDL3A ACO1 EIF1B-<br/> AS1 DIRAS2 DUX4L45 SLC5A9 RRBPI CDHR3 TJP1 DSG1 ERICH3 LINC00354 JCAD ANKRD24 GID8<br/> TADA2A RPL15P2 RBPMS2 AK2 CYP4A11 LRRC9 OSBPL6 GRB14 PNPLA8 LINC01425 LARP6 SEMA4B<br/> NIPAL2 LINC01807 LONP2 PEX6 DHRS3 INTS4P1 PRRC1 SPIN1 C21orf91-OT1 DROSHA ZNF813 SNTB2<br/> KPNAL1 TTC3P1 FAM149B1 LAMC1 CCND3 SRP9 PBX3 SMIM1B ANGPT1 PCNX1 RPF2 HHAT CHASERR<br/> MTCO1P1 SEL1L IGLV5-45 ADGRG6 SLC4A10 PHLPP1 GPR89B BTF3L4 LINC00844 MIR3936HG ZNF618<br/> ITGA4 LIX1-AS1 TSSC2 CEP57L1 ROCK1 RBPJP5 TGM1 MIR3142HG FTLP13 AGPVD1 LINC01310<br/> ZDHHHC18 ARHGAP31 HLA-F RXRG FAM183A RGPD4 UHRF1BP1L FRG1DP ADSS2 OR4F15 IKBIP<br/> RNF220 IKZF2 OR8B9P PDE2A ASPM RFC2 LINC01643 DENND2C TBC1D13 KCNJ1 PRG4 IGLV3-1<br/> CLCA4 SCGB1D1 LINC01877 SLC5A12 MLLT1 TG HERPUD1 DGKG ATP8A2P3 METAP1D SLC36A1<br/> ATP6V0CP3 LAMB1 ANKRD19P OR5AQIP XPNPEPI HOMER2 GLYATL3 PCGF5 FGFTP1 TUBBP9 IGLV2-<br/> 18 NFIB NDUFAF2 GUCY1A2 LINC01524 UMODL1 KREMEN1 MB FAM66E ZBTB33 SOD1P2 MGA<br/> MIR924HG LINC02549 CLCN5 MIR4300HG OR4R3P RTTN FGF9 NIN RPL23AP53 SPG21 ZNF302 GARS1-<br/> DT ANKFY1 CREG1 LINC02488 LIMCH1 CMPK1 SCN2A ZKSCAN5 WNT7A GMDS-DT GNAQ ZNF449<br/> MIR548A1HG MTMR7 HNRNPM SPIRE1 TMEM71 ZNF14 C1QTNF3-AMAC UBE2A FAM242A DEFB108B WSCD2<br/> PPII2 AP4S1 LINC02149 E2F6P2 COL14A1 TRAV8-1 RBM47 CASC17 GBP6 JARID2 SANBR ZNF367<br/> FBXO41 LINC01666 PRR5L MACROH2A1 UBAP2L TRIM43CP PCDH8 LINC01673 PRPF18 SMOC1 GSTA3<br/> WDHD1 MAMDC2-AS1 TOGARAM1 SLC45A4 ELF2 SCAMP1 PTCHD4 ANTXML LINC02615 GLYAT KIF15<br/> JP72 ZFYVE26 SNX3 LINC01422 CEACAM7 DST TMEM161A MSH2 CYLD FAM242A DEFB108B WSCD2<br/> UBE3D VLDLR-AS1 GLIDR CERS3-AS1 CAPN5 CADM1 KLHL29 ABCA4 LINC01718 OPRM1 ACER2<br/> THUMP2 APCDD1 RGS9 PCCA CNKSR1 CLVS1 YLPM1 DIPK1A SFL1 SLC13A5 VCAM1 LINC02511<br/> LINC01818 ATP6V1C2 LINC01992 INMT-MINDY4 OXNAD1 GNA14 TM7SF3 PLEKHA8 LINC01721 PDK1<br/> LINC02055 CYP2A7P1 PROX1-AS1 DENND4C PSG6 ARFGEF1 HDHD5 PITPNM3 PPP1R1C SDR42E2<br/> IARS2 CCDC150 DNM1P47 HEMGN CDC42BPB FAM217B CISD1 SYT14 LINC02241 ZNF295-AS1 CHSY3<br/> PRKAB1 YAP1 YBX3 LINC01748 LMX1B MICALL2 LINC02245 BMPR1B LINC01173 C2orf42 SMARCA2<br/> C2orf83 TLL1 LINC01297 C1orf127 DUSP16 ELL2 DAW1 SAMMSON IGHV3-74 RIPOR2 PTGS1 LINC01811<br/> LINC02899 RPF1 TRIT1 NDUFA10 CEPT1 KCNK5 HSPD1P3 HKDC1 CLNSIA DUX4L33 NUP43 EPS15L1<br/> NMD3 DNER GOLGA6A GATAD2B XIRP2 KRT85 ANXA4 SLC14A1 CA1 C5orf52 FAM72C RANBP2<br/> IGKV3OR22-2 SERPINI2 APBB1P ADGRG7 STRN TSBP1-AS1 NPM1P1 FAM81A SMG1P4 SNAI2 ZBTB49<br/> DGCR2 RN7SL250P RNA5SP99 ADGRA3 CLDN18 HSPG2 FAM180A LHX9 GALNT16 MSANTD2 FCHO2<br/> RFTN2 ANO6 COL6A6 OR4K2 RN7SL767P USH1C DNAH5 HIPK1 PTPRD-AS2 SATB1-AS1 VAV1 CACNA1I<br/> PDGFC PEPD IFI44 RPS6KA3 RETREG1 LINC02307 LINC02269 NLRP14 DNAJC13 NPHP3-AS1 IGLV3-30<br/> CNST VPS13B FAM138E ASB2 OTOP1 PSME3IP1 GHRH GOLGA8B DPY19L2P3 IGLV4-3 LINC02315<br/> SLC39A6 </p> |
| HEK293T | 3434 | <p> DDC8 ELMO2 USP17L28 RIT2 CASC20 TRAF3IP2-AS1 DYP30 MIR4677 PAX7 CMTR2 GPR98 GNL3 BBOX1<br/> IFNA20P ZNF799 FRG2 NCF4 LCORL MIR4461 ALDOAP2 BSN-AS2 FGFR1OP2P1 DDB1 DLEU7 CNGB1<br/> EPB41L4B EP300 HS3ST3A1 RDH10 GPSM2 KLHL14 PRKCG KCNA6 DTNBP1 RGN MIR3156-3 C4orf22<br/> BCRP6 MSRB3 GDA MREG AK7 MAP3K3 NINL MIR489 RNF185 TNS3 NR4A2 PIR RRP7A CYP4F59P<br/> KIAA1199 FIBCD1 SORL1 C15orf41 SNORA46 SLC22A2 LINC00698 ACTG1P4 CNTN4-AS2 MAPKAPK2<br/> ATXN10 ACTR8 KIAA1210 ITGA3 ZNF510 STX8 EFNBI ACSM3 C5AR1 ZNF623 HIGD1B SLC02B1<br/> RN7SL872P PHF20 GTPBP1 GRK5 DGUOK C1QTNF3 MANEA SEL1L3 RNU6-749P SRRM4 FAM73A<br/> RAPGEF6 RRN3P2 OR8J3 PYY STARD5 GBP7 RSU1P2 TLK1P1 LINC01121 C2CD3 RPL26P9 GPR78 GSTA2 </p>                                                                                                                                                                                                                                                                                                                                                                                                                                                                                                                                                                                                                                                                                                                                                                                                                                                                                                                                                                                                                                                                                                                                                                                                                                                                                                                                                                                                                                                                                                                                                                                                                                                                                                                                                                                                                                                                                                                                                                                                                                                                                                                                                                                                                                                                                                                                                                                                                                                                                                                                                                                                                                                                                                                                                                                                                                                                                                                                                                                                                                                                                                                                                                                                                                                                                                                                                                                                                                                                                                                                                                                                                                                                                                                                                                                                                                                                                                                                                                                                                                                                                                                                                                                                                                                                                                                                                                                                                                                                                                                                                                                                                                                                                                                                                                                                                                                                                                                                                                                                                     |

|  |  |                                                                                                                                                                                                                                                                                                                                                                                                                                                                                                                                                                                                                                                                                                                                                                                                                                                                                                                                                                                                                                                                                                                                                                                                                                                                                                                                                                                                                                                                                                                                                                                                                                                                                                                                                                                                                                                                                                                                                                                                                                                                                                                                                                                                                                                                                                                                                                                                                                                                                                                                                                                                                                                                                                                                                                                                                                                                                                                                                                                                                                                                                                                                                                                                                                                                                                                                                                                                                                                                                                                                                                                                                                                                                                                                                                                                                                                                                                                                                                                                                                                                                                                                                                                                                                                                                                                                                                                                                                                                                                                                                                                                                                                                                                                                                                                                                                                                                                                                                                                                                                                                                                                                                                                                                                                                                                                                                                                                                                                                                                                                                                                                                                                                                                                                                                                                                                                                                                                                                                                                                                                                                                                                                                                                                                                                                                                                                                                                                                                                                                                                                                                                                                             |
|--|--|---------------------------------------------------------------------------------------------------------------------------------------------------------------------------------------------------------------------------------------------------------------------------------------------------------------------------------------------------------------------------------------------------------------------------------------------------------------------------------------------------------------------------------------------------------------------------------------------------------------------------------------------------------------------------------------------------------------------------------------------------------------------------------------------------------------------------------------------------------------------------------------------------------------------------------------------------------------------------------------------------------------------------------------------------------------------------------------------------------------------------------------------------------------------------------------------------------------------------------------------------------------------------------------------------------------------------------------------------------------------------------------------------------------------------------------------------------------------------------------------------------------------------------------------------------------------------------------------------------------------------------------------------------------------------------------------------------------------------------------------------------------------------------------------------------------------------------------------------------------------------------------------------------------------------------------------------------------------------------------------------------------------------------------------------------------------------------------------------------------------------------------------------------------------------------------------------------------------------------------------------------------------------------------------------------------------------------------------------------------------------------------------------------------------------------------------------------------------------------------------------------------------------------------------------------------------------------------------------------------------------------------------------------------------------------------------------------------------------------------------------------------------------------------------------------------------------------------------------------------------------------------------------------------------------------------------------------------------------------------------------------------------------------------------------------------------------------------------------------------------------------------------------------------------------------------------------------------------------------------------------------------------------------------------------------------------------------------------------------------------------------------------------------------------------------------------------------------------------------------------------------------------------------------------------------------------------------------------------------------------------------------------------------------------------------------------------------------------------------------------------------------------------------------------------------------------------------------------------------------------------------------------------------------------------------------------------------------------------------------------------------------------------------------------------------------------------------------------------------------------------------------------------------------------------------------------------------------------------------------------------------------------------------------------------------------------------------------------------------------------------------------------------------------------------------------------------------------------------------------------------------------------------------------------------------------------------------------------------------------------------------------------------------------------------------------------------------------------------------------------------------------------------------------------------------------------------------------------------------------------------------------------------------------------------------------------------------------------------------------------------------------------------------------------------------------------------------------------------------------------------------------------------------------------------------------------------------------------------------------------------------------------------------------------------------------------------------------------------------------------------------------------------------------------------------------------------------------------------------------------------------------------------------------------------------------------------------------------------------------------------------------------------------------------------------------------------------------------------------------------------------------------------------------------------------------------------------------------------------------------------------------------------------------------------------------------------------------------------------------------------------------------------------------------------------------------------------------------------------------------------------------------------------------------------------------------------------------------------------------------------------------------------------------------------------------------------------------------------------------------------------------------------------------------------------------------------------------------------------------------------------------------------------------------------------------------------------------------------------------------------------------------|
|  |  | <p> ISM1 GRAMD2 ANKRD20A3 CORO2A ARHGAP42P4 MIR4499 AP4B1-AS1 RNF4 CDK8 KIAA1211L HDAC7<br/> ABCD1P3 FAM19A4 CHST15 FPGT CDK1 NLGN1-AS1 N4BP2L2 ZNF232 OPHN1 RPS11P6 RPS15AP6<br/> BANF2 FAM90A6P KIAA0100 MYH6 MAP3K13 CLUHP4 LCMT1 LINC00924 SSXP1 SAA2-SAA4 SLC24A5<br/> MIR654 LINC01047 OR7E25P KIAA1324 OR4M2 PLCL2 BDKRB1 C4orf29 WDFY2 NME8 TP53TG3C PXDN<br/> GXylT1P1 PRAMEF7 FAXC TOMM34 TF COG1 CHST11 PWP2 DNAL4 SLC9A9 GSTM4 ANHX RCSD1<br/> EXOC2 OR10J6P TSPAN7 MIR1185-1 HPRTP4 HERC2P8 PAQR8 MIR4768 RNU6-966P CDK17 GNRHR<br/> HDAC1P2 SUZ12P SARS QKI GAGE2B LAMB4 MAN2B1 RN7SL318P PRDX4 AGT LRRTM3 FGF1 CHRMI<br/> FUT4 OR4A42P DBH RPLP0P7 OR5G1P GPATCH2 TMEM11 RPL7P55 QRICH1 KRT222 UBE2L6 PCCB<br/> IPO13 LTBR ARHGAP15 TDRKH CCR3 GNB4 AGTPBP1 HBG2 PRR5 SPRR2B SMTNL2 HNRNPA1P74<br/> SALL4P7 PALM2-AKAP2 AH11 BDH2P1 ACTR5 HEATR5B FHL1 LRRC53 TMEM161B-AS1 EMR1 FAM225B<br/> NMNAT2 UBE2N IL23R ACAD11 NEGR1-IT1 SYTL5 PIGL GDI2P2 C1orf112 HUS1 DYRK4 ZNF667 TFEC<br/> GRIK1-AS1 PLSCR4 PPARGC1A STRIP1 MSNP1 GGN ZNF709 ETFA AHRR CYP3A5 PCDHGB4 GTSF1<br/> LINC00313 GPX1P2 VRK2 ITSNI DUX4L3 EP400NL ELMO1-AS1 STOML3 PLK1S1 C3orf22 ZNF962P CMA1<br/> TBC1D3B UPK3B PREX2 PI15 FAM177A1 SNORD11 ELAVL2 RPS20P22 FAM9B TNFAIP8L3 WDR16<br/> ZNF863P SNCAIP DEFA1B KLHL28 DLGAP1-AS4 OR11L1 DNAJB4 TMEM189 PECR PCDHGA10 SVOPL<br/> EIF2S1 EDDM3B POLR1A LGR5 TMPRSS4 TSHZ1 LINC01028 LRRC16B RAB5A AKAP2 SMCO2 JRK<br/> H2AFZP1 FAM131C ARHGAP25 SNX18P9 RNA5SP470 EMCN-IT2 MIR491 CCDC60 OR8K3 SMAD1-AS2<br/> RAB11FIP4 NF1 LPPR4 RPL39P36 PPFBP1 USP24P1 FAM49A BCL7A PCDHGA2 IL20RA ELF1 MIR4439<br/> IGLL5 OR9I3P FPGT-TNNI3K SAFB2 VPS16 SLC9A2 SULF2 SOST CCDC144A OR52T1P RRAGC TAF1D<br/> RN7SL345P IGHV8II-47-1 WIF1 STRN3 CMKLR1 PGBD4P7 PLCB1-IT1 GPRIN2 SDK2 ANKRD40 CCT6B<br/> KRT74 FAM90A19P ZFHK2 FBXL5 RNU6-1241P RNF43 NR2F2-AS1 SNX18P25 ZNF677 MAP2K4 CSRP2BP<br/> CD72 KAT5 MIR361 SRRD PROS1 MAS1 OR2L13 PPP6R2 GIMAP6 RPS7P5 ZBTB41 CDK2AP2P1 ITGA2<br/> SHANK2-AS1 MME FAM213A RNU1-142P ZNF713 SNORD116-27 DSCAM-IT1 MBLIP MALL IL10RB PARK2<br/> MAPK8IP2 VWA3A ARHGAP10 ALPK1 FLJ00273 IGHV8II-2-1 C21orf2 RNU6-554P BZRAP1-AS1 KLK9<br/> RN7SKP80 RN7SKP16 GSK3B PDXP KIF9-AS1 VPS37B KIR2DL1 PCDHGA4 FOXO1 PCDH9-AS2 IGLV5-37<br/> PANK3 FAM211A WDR82 MTND6P3 PKP2 AMPD3 NPHP3 SFXN3 SNORA71 CHDC2 GCLC TUBAP<br/> SNORD113 SERPINA4 MTCO3P2 IL18RAP TBLP2 RNU6-164P TRIM16 CDC40 SETD3 MIR539 PQLC3<br/> MIR4713 GPR110 ACOX3 CD109 CRI SLC22A3 LINC00161 NUP210P1 SNORD116-17 DAAM2 ARHGAP8<br/> ZNF571-AS1 PLXNA4 SLC22A5 GRIN3A OR2T4 RN7SL678P KIF23 GRAMD1C ANAPC1P1 NDE1 IGHV8II-<br/> 26-1 STK24 ZNF695 VPS26B PARVG RNU1-106P SEPT7P4 FEMIAP4 RNU6-438P PDCC6 BRI3BP BACH1-<br/> AS1 LMO7 NUTF2 COX16 CDRT4 KRTAP10-5 MAN1A1 CD177P1 PCED1B NLGN4X RNU6-1021P KLF3P1<br/> IGHV4-28 FSD2 EIF4E LINC01162 ATP5A1 SPRR2C BP1FB1 HTR4 PPP1R26P3 EMB RNU6-890P C14orf183<br/> LINC00320 FAM19A5 C12orf55 RNU6-1003P KRT72 OGN PIK3C2B FMRI GPR21 PA2G4P3 C5orf64<br/> RN7SL542P FAM184B ERCC4 OR4K15 LINC00595 RNASEH2C C9orf153 IRAK2 COMMD1 CCDC3 RNU6-<br/> 258P ANXA10 MIR765 WDR33 RN7SKP233 OR5K4 PCMTD1P2 RN7SL92P MTCO1P3 PAK7 CHD7 SLC30A8<br/> RNF126 DPM1 PSMB7 RXFP4 C5orf51 ANKH MOV10L1 RN7SL179P KRT4 MEPIAP1 IGKC ANKRD20A14P<br/> MDM2 LINC00630 BCRP1 TDRD3 MIR544A OVCH1-AS1 NDST3 RN7SL686P FAM19A2 CDHR4 GBBX<br/> OR5L2 ZNF285 CLASP1 FARP2 SNX5 CYSLTR1 PAPD7 MIR154 SNORD115-35 OR51B2 NR4A1 TMEM175<br/> TIGD4 SLX1B-SULT1A4 C14orf37 GLT8D1 UPB1 CLDN14 RGS17P1 SKIV2L2 SCARNA15 GUCY1B2<br/> SERBP1P6 ARMC9 MCOLN3 LRP8 TAGLN3 IGHV1-69 NFE2L3 MINPP1 KCNG3 PSMD6 TMC5 DUX4L12<br/> KIAA1257 LINC00365 SKI HIGD1AP13 ZNF544 LRRC70 TMEM50B KRTAP13-5P SNORA1 SPI140<br/> MTATP8P1 TNFSF8 PDE5A FBLN2 HBE1 TEK4 OR5G5P TFP1 BCKDHA RPS2P48 RNA5SP265 SCLT1<br/> TMEM52B LINC00970 RNU6-141P EIF4ENIF1 UBE2Q2P10 ZNF433 RPL7L1P12 SRGAP1 ABCA11P<br/> SLC16A4 PLAC1 PWAR6 LINC01094 CALCR DUSP27 TBX3 OR8K4P NANOGBNP2 MIR620 MIR4753 DIO2<br/> UNC13A RNU6-837P SLC5A10 TRIBOP TUBA3FP NCOA1 MRPS31P5 CHEK2 DOCK9-AS2 OIT3 ZBBX<br/> LRMP HTRA1 RAD1P2 ZNF585A IFT88 SIGLEC30P CHST12 ARHGAP5 DDX21 KIAA1731 P2RX1 ILDR1<br/> DGCR14 TNIP1 PAN3 FSIP2 TOX2 ZBED4 ZNF720 METTL24 RHOJ ZER1 CLUHP5 FCRL5 MRPS31P4 BRE<br/> RNU1-60P FAM9A ZNF474 OGFOD1 OR52X1P ZBTB8B BACH1-IT2 PHEX ZNF730 QRSL1P3 FAM182A<br/> POLE TSPEAR FILIP1L COL4A6 CATSPERB ZNF559-ZNF177 DET1 FECH SLC7A TACR3 RSPRY1 MPTX1<br/> ACTBP8 IGLC2 SLC1A3 MIR3173 PCDHGA11 C14orf119 DNAJA1P1 MT1F FGF12-AS1 RNA5SP438 ASNSP5<br/> LRCH1 LRRC18 FAM124A TCL1B FGF13 SULF1 SLC39A10 CDCA2 DTD2 IGHVIV-44-1 PDIA6 RNU7-119P<br/> PRKG1-AS1 SNORA76 SDIM1 FTCDNL1 RNU6-631P SPIN3 HCN4 OR1111P CD8B CD84 MRPS21 ZNF830<br/> MAGEA11 SH3BP1 ISLR2 B3GNTL1 ERMN MIR605 IGKV1D-12 SIM2 C12orf36 TRIM48 KIRREL GPC3<br/> RNA5-8SP3 TLK2P1 DMD C22orf39 NANOGP4 RNU4-56P TMEM50A STAMBPL1 ADCY2 ZRANB2-AS2<br/> SH3BP5-AS1 TCF20 STAG3L2 CRYL1 OTC MRPS6 NOVA1 KCNC2 IGHV3-64 PER1 ANKRD20A4<br/> RNU6ATAC31P RN7SL736P RNMT MYH4 MIR1324 RNU6-449P SH3BGR PCDHGB3 NF1P8 RN7SL714P<br/> SLC25A1P5 KIR3DL3 DTX2P1 TMEM135 ARHGAP35 PRDX2P3 PREX1 WARS2 TBX22 C16orf3 RNA5SP385<br/> LINC00587 UBE2V1 POLD1 RFFL MBOAT7 IGLJ2 POMC EIF3E TRDV1 RPL21P41 NLRP12 MIR4681 TLE4<br/> CNNM3 TLK2 SH3GL2 COL24A1 SNX18P8 ANO3 MIR759 GAK PSPC1 COL11A1 TREM1 SLC13A3 CCP110<br/> ITGAE LRRC37A17P ODF3B CACNG6 RNU2-33P MCM3AP-AS1 FARI-IT1 ZNF804A WDR83 MIR1254-2<br/> DOCK7 N6AMT2 WRB OR4N3P TTC4 ZNF734P XKR4 C15orf54 OR10AK1P KCNJ16 PTGER4P3 PCOLCE2<br/> CDC20B IGLVI-68 LINC01143 LINC00347 SLC26A7 GPC5-IT1 ZNF57 C9orf3 SYNM RAPGEF4-AS1 MAPK4<br/> RNASEH2B-AS1 FAM3D OMG ZNF486 RN7SL83P EZH2P1 BRAFP1 CWF19L2 NRG3-AS1 VN2R17P<br/> EXOSC3P1 OR4F16 MRPS18B AOX1 IGKV1-5 USP17L27 JRKL SERPINA5 ANKRD34C ZNF697 PRED60<br/> RBAK LINC00472 TYMP DIO3OS GULP1 IFNWP4 GPR75 TMEM110 PRAMEF8 ARHGAP11B PCDHGA3<br/> THEMIS SLC5A8 FLVCR2 COL12A1 MIR4529 MTND2P25 ZNF280D GAGE2C FAM230B RHBDD1 OR8K2P<br/> DRG2 IGHV3-76 HDLBP MLLT4 RNF6P1 MAST4-AS1 CBFA2T3 COG7 IGHV7II-31-1 KLF3 DPH1 BAIAP2L1<br/> SLC6A6P1 EFTUD1P1 PTGER3 IGKJ5 USP29 LINC01013 KIF26B UGCG MIR3936 SLC6A2 SNORA56 ORC3<br/> TVP23C ELP4 RYK IER2 SNORD115-48 LINC00839 TGFB2 CHRDL1 TRAF3IP2 HSPB8 LAMA2 PXT1<br/> ATP6V0D1 RLBP1 LZTR1 ZNF85 C8A TEX36 CAPN3 IGHV3-72 TFDP2 CCDC12 IGLVIV-64 REXO1L10P<br/> KCNE1 ITLN1 KLF8P1 FAM20A ZSCAN5A LINC00645 SOX4 UGT3A1 IFI27L1 SLX1B KRT223P FAM95B1<br/> SH3RF3 C18orf8 TPP2 NPM1P25 GTF2E1 ST6GALNAC5 RGS16 C2orf91 TCEB3CL DIAPH2 RTL1 TUBAL3 </p> |
|--|--|---------------------------------------------------------------------------------------------------------------------------------------------------------------------------------------------------------------------------------------------------------------------------------------------------------------------------------------------------------------------------------------------------------------------------------------------------------------------------------------------------------------------------------------------------------------------------------------------------------------------------------------------------------------------------------------------------------------------------------------------------------------------------------------------------------------------------------------------------------------------------------------------------------------------------------------------------------------------------------------------------------------------------------------------------------------------------------------------------------------------------------------------------------------------------------------------------------------------------------------------------------------------------------------------------------------------------------------------------------------------------------------------------------------------------------------------------------------------------------------------------------------------------------------------------------------------------------------------------------------------------------------------------------------------------------------------------------------------------------------------------------------------------------------------------------------------------------------------------------------------------------------------------------------------------------------------------------------------------------------------------------------------------------------------------------------------------------------------------------------------------------------------------------------------------------------------------------------------------------------------------------------------------------------------------------------------------------------------------------------------------------------------------------------------------------------------------------------------------------------------------------------------------------------------------------------------------------------------------------------------------------------------------------------------------------------------------------------------------------------------------------------------------------------------------------------------------------------------------------------------------------------------------------------------------------------------------------------------------------------------------------------------------------------------------------------------------------------------------------------------------------------------------------------------------------------------------------------------------------------------------------------------------------------------------------------------------------------------------------------------------------------------------------------------------------------------------------------------------------------------------------------------------------------------------------------------------------------------------------------------------------------------------------------------------------------------------------------------------------------------------------------------------------------------------------------------------------------------------------------------------------------------------------------------------------------------------------------------------------------------------------------------------------------------------------------------------------------------------------------------------------------------------------------------------------------------------------------------------------------------------------------------------------------------------------------------------------------------------------------------------------------------------------------------------------------------------------------------------------------------------------------------------------------------------------------------------------------------------------------------------------------------------------------------------------------------------------------------------------------------------------------------------------------------------------------------------------------------------------------------------------------------------------------------------------------------------------------------------------------------------------------------------------------------------------------------------------------------------------------------------------------------------------------------------------------------------------------------------------------------------------------------------------------------------------------------------------------------------------------------------------------------------------------------------------------------------------------------------------------------------------------------------------------------------------------------------------------------------------------------------------------------------------------------------------------------------------------------------------------------------------------------------------------------------------------------------------------------------------------------------------------------------------------------------------------------------------------------------------------------------------------------------------------------------------------------------------------------------------------------------------------------------------------------------------------------------------------------------------------------------------------------------------------------------------------------------------------------------------------------------------------------------------------------------------------------------------------------------------------------------------------------------------------------------------------------------------------------------------------------------------------------|

|  |  |                                                                                                                                                                                                                                                                                                                                                                                                                                                                                                                                                                                                                                                                                                                                                                                                                                                                                                                                                                                                                                                                                                                                                                                                                                                                                                                                                                                                                                                                                                                                                                                                                                                                                                                                                                                                                                                                                                                                                                                                                                                                                                                                                                                                                                                                                                                                                                                                                                                                                                                                                                                                                                                                                                                                                                                                                                                                                                                                                                                                                                                                                                                                                                                                                                                                                                                                                                                                                                                                                                                                                                                                                                                                                                                                                                                                                                                                                                                                                                                                                                                                                                                                                                                                                                                                                                                                                                                                                                                                                                                                                                                                                                                                                                                                                                                                                                                                                                                                                                                                                                                                                                                                                                                                                                                                                                                                                                                                                                                                                                                                                                                                                                                                                                                                                                                                                                                                                                                                                                                                                                                                                                                                                                                                                                                                                                                                                                                                                                                                                                                                                                              |
|--|--|------------------------------------------------------------------------------------------------------------------------------------------------------------------------------------------------------------------------------------------------------------------------------------------------------------------------------------------------------------------------------------------------------------------------------------------------------------------------------------------------------------------------------------------------------------------------------------------------------------------------------------------------------------------------------------------------------------------------------------------------------------------------------------------------------------------------------------------------------------------------------------------------------------------------------------------------------------------------------------------------------------------------------------------------------------------------------------------------------------------------------------------------------------------------------------------------------------------------------------------------------------------------------------------------------------------------------------------------------------------------------------------------------------------------------------------------------------------------------------------------------------------------------------------------------------------------------------------------------------------------------------------------------------------------------------------------------------------------------------------------------------------------------------------------------------------------------------------------------------------------------------------------------------------------------------------------------------------------------------------------------------------------------------------------------------------------------------------------------------------------------------------------------------------------------------------------------------------------------------------------------------------------------------------------------------------------------------------------------------------------------------------------------------------------------------------------------------------------------------------------------------------------------------------------------------------------------------------------------------------------------------------------------------------------------------------------------------------------------------------------------------------------------------------------------------------------------------------------------------------------------------------------------------------------------------------------------------------------------------------------------------------------------------------------------------------------------------------------------------------------------------------------------------------------------------------------------------------------------------------------------------------------------------------------------------------------------------------------------------------------------------------------------------------------------------------------------------------------------------------------------------------------------------------------------------------------------------------------------------------------------------------------------------------------------------------------------------------------------------------------------------------------------------------------------------------------------------------------------------------------------------------------------------------------------------------------------------------------------------------------------------------------------------------------------------------------------------------------------------------------------------------------------------------------------------------------------------------------------------------------------------------------------------------------------------------------------------------------------------------------------------------------------------------------------------------------------------------------------------------------------------------------------------------------------------------------------------------------------------------------------------------------------------------------------------------------------------------------------------------------------------------------------------------------------------------------------------------------------------------------------------------------------------------------------------------------------------------------------------------------------------------------------------------------------------------------------------------------------------------------------------------------------------------------------------------------------------------------------------------------------------------------------------------------------------------------------------------------------------------------------------------------------------------------------------------------------------------------------------------------------------------------------------------------------------------------------------------------------------------------------------------------------------------------------------------------------------------------------------------------------------------------------------------------------------------------------------------------------------------------------------------------------------------------------------------------------------------------------------------------------------------------------------------------------------------------------------------------------------------------------------------------------------------------------------------------------------------------------------------------------------------------------------------------------------------------------------------------------------------------------------------------------------------------------------------------------------------------------------------------------------------------------------------------------------------------------|
|  |  | <p> RNU6-58P CRYZL1 MEC2P CSN3 BMPRIA CLDN11 TIMP3 MIR4742 RPL23AP12 SLC39A12-AS1 ZNF299P<br/> RARRES2P6 DSCAML1 FAM207CP DUXAP8 PLN DUX4L8 PRDM9 FBXO27 SMAD3 CTDSP2 C14orf182<br/> NAPG MRV11 PABPC1P12 CCDC39 C1orf101 USP17L6P SLC16A7 FAM192A RNU6-196P MDH1 ZRANB3<br/> MRPL19 DCBLD2 PRKAR2A TMEM185AP1 THYN1 KATNAL1 MAGI2-IT1 MYO6 OR9G2P AKIRIN2 MRPL33<br/> VCAN-AS1 KIFAP3 MIR127 C1orf63 GLRA2 BTBD17 SPRN BORA PI4KA POU2AF1 VWA8 ACBD5 ALDH4A1<br/> TMC2 FAM105B DHRS7C OR51B8P PCDHGA7 TRIM72 INSC SYNJ2BP-COX16 TNFRSF11B PIBF1 ARF4<br/> SNORD115-20 MIR3667 LMF1 TMPRSS11E NCF2 MRPL48 CAPN14 RNA5SP453 USP16 SNORA40<br/> IGHV4OR15-8 GALNT5 RIPPLY3 COMMD7 PLXNB1 C9orf171 CNGB3 SLC25A15P2 MIRLET7C STAT4<br/> DPYD-AS1 LY86 CYCSP51 OR4C16 PDXK MTND1P12 CDC27P1 LRRC4 ZNF670 NDNL2 IFFO2 IGFBP7<br/> POTEE UFD1L CTBP2P4 EPHA5 FAM24B MACROD2-IT1 OVGP1 LINC01136 FAM27B SGIP1 MERTK<br/> CEACAM18 RN7SL801P SNORD115-36 SLC47A1 RNF144A CST1 USP17L30 RN7SL864P RPL37P4 CCL7<br/> TP73 IGKV1-12 RBMS2 TMPRSS6 SERPINA1 LINC00376 TAPBP IL1RL1 RN7SL77P ZNF765 IGHV1-14<br/> GPR64 LINC00535 TAC4 MYO16 CYP4F31P ALG12 ZNF366 RPL30P13 CHIAP3 MIR548U MTND4P12<br/> ZNF540 LOH12CR1 ISPD CD58 SNX31 GRHL2 RNU6-1178P CDR2 IGHV1L30-1 SELE BP1FC PSMC6<br/> MAGT1 KLF6 PCNX ITGB7 CHKB SCUBE1 ARHGAP42P5 RNU6-1171P TMPO SNORD69 GPR112<br/> FAM230A MIR663A NOTCH2NL ABCA8 PDE9A LINC00894 SLC01B7 KCNQ1OT1 MAPK14 PRR14L<br/> DYNLL2 RNU2-53P FBXW12 MYPN RPL29P30 LINC00669 SATB2 RNF216P1 ABTB2 MOCS3 MIR4477A<br/> GPR126 PPHLN1 RNU6-185P SNORD115-21 CHL1 RAPGEF1 VANGL2 DGKZ INTS4L2 REXO1L8P RAB23<br/> ROCK1P1 FAM8A2P ZNF516 VLDLR LINC00092 HSPD1P7 KRTAP12-2 ELN SAMD8 REG1B CST9L HPS3<br/> CKNK17 ARHGEF3 SNORD115 RHBDL3 MAML3 GABRB2 EDNRB MAN1C1 CFTRP1 ATP5S RCVRN NLRP7<br/> CD226 RBM14-RBM4 STAT3 RNU6-513P CYCSP17 TPCN2 CNN2P4 DMBT1P1 LRR1Q3 GPR141 PRR5-<br/> ARHGAP8 TPH1 MAD1L1 SNORA51 MARK2P5 GPR176 RNU6-1266P MYH11 MATN3 IFNGR2 PKP4<br/> RNASE9 SHPRH FAM155A-IT1 UOX SIPA1L1 RNU6-538P DPY5 TGFBR1 GBP2 WDR4 DUX4L13 TTLL2<br/> RN7SL607P UACA LRPPRC HEXB RPL34P3 ZNF209P RPS4XP22 ABI3BP LAMTOR5-AS1 TSNA5 C12orf60<br/> TAS2R1 C5orf34 IGHV1OR15-6 PRRC2C TUB ARHGEF18 RUND3C3B TRIM51P SCAMP5 ADAMTS20<br/> LINC00473 WBSCR17 GNAS-AS1 CDH6 RNA5SP35 PCDHGB2 IPMK CAMP KRT126P TRAV8-5 DENND5B<br/> TNS1 SSUH2 RBL2 MS4A15 CASP7 LENG8 DUX4L9 USP53 IGHV3-30-2 AATF OR10K2 MRPL50 CHEK2P4<br/> ACSL5 RNU6-352P DOK6 RN7SL449P DKC1 hsa-mir-4528 ADCY8 PCDHGA12 GRAMD4 PSG1 RNU6-978P<br/> TPST2P1 DNAJB6 NFIC ELP3 PPIAP1 GABRR3 SUN2 SNRPGP9 HIAT1 SEPT7P9 FRMPD2 KEAP1<br/> NPM1P31 OMA1 RPL30 CCDC30 SULT4A1 SHC3 DYNC2H1 WDR7-OT1 ARRDCA MIR1299 SRP19 UROS<br/> KLHL25 IGLVIVOR22-1 DYNLRB2 SLITRK6 STX16-NPEPL1 ABHD17AP5 TCAIM FOXD4L4 MYO7B OASL<br/> KCTD9 TM4SF2 OSGIN2 ACTN2 DARC PET112 CRISP3 NEB SRSF4 POU5F1P3 CAMK2G STAG3L5P<br/> TPTE2P4 C6orf3 HNRNPA1P7 FGF14 BRD1 KIF3B SNX7 MIR1290 CCL15-CCL14 GLRA3 SPRED3 VP58<br/> CEP164P1 BCL7C TMEM100 SNORD115-12 NPM1P48 RNF165 ANP32C CASC4P1 FRG2C ZNF429<br/> CUBNP1 HDHD1 CTBP2P5 DRD5P1 RNF213 LYPD6 DHX9 PDIA5 SUCLG1 OR5111 KCTD20 WDR47 VDR<br/> MIR4452 SLC25A1P2 KRTAP13-6P SPESP1 snR65 DTD1 MIR4695 DUSP11 DUX4L7 RNU6-1061P OR51L1<br/> SH3RF2 RPS3AP46 OR4A5 FOXP4 DUX4L10 RN7SKP168 CACNA1D ASGR2 ELOVL2-AS1 DPT RG55 ACSS1<br/> ABCG2 LINC00111 TBL1X CLSTN1 LANCL3 SPAG17 ZDHHC11 EPHA3 MOV10 RPL39P40 TMEM150C<br/> SEMA5B TMBIM7P MIR1280 ZNF337-AS1 SELK MS4A1 RPS6KA2-IT1 MYH14 IGHV3-16 SKAP1 PILRB<br/> CC2D2A DSC3 WDR11 MIR487B TPRG1 RNA5SP269 SNX29P2 SNORA22 ST13P15 CCRI CACNB4<br/> LINC00710 CHM MTND1P2 SDAD1P1 LINC00395 USP6 ZNF732 MIR655 KLF7 AHSAL AKR1B1P1 MGAT2<br/> LARGE-IT1 RN7SL673P PYGL FAM65B TXK NOL12 CHTF8 FPGS LINC00446 OSBPL10-AS1 ADH5P3<br/> GYXLTP2 ZNF354B IL12RB2 USP17L29 IQCA1 NLN C8B OR4A12P TCEB3C RNU6-49P RREB1 PABPC1L<br/> MTND1P23 MND1 GTF2A1L PABPC1P5 MIR4519 ANKRD30BP3 TAF1 SPNS2 HERC2P5 RNU6ATAC33P<br/> API2 ATP6V1E2 NBPFI0 ITIH6 CCDC53 FGF14-IT1 CYCSP41 ATP6V1H C5orf66 DHTAS1 PTPN21<br/> PLAG1 MIR1267 RNA5SP366 SNORA8 PPP6R2P1 ENTPD4 NPEPL1 THAP7 WDR35 CTBP2P7 RNF144B<br/> ZNF841 CCDC33 ATG4C SNTN RBM11 FEM1AP2 ABCB10 LHFP1L RPL31P40 FBXL21 KRTAP20-3<br/> C15orf57 LGII U6 IGLC1 IGHV7-34-1 ENTPD3-AS1 SIL1 TATDN2P3 SNORD112 PGAP3 EFN2 C21orf62<br/> PKD1L1 ALDH1A1 TSNAE1 HELLS FAM69A OR11H1 BTF3P14 ARHGAP42P3 CNGA4 CYCSP32 GCFC2<br/> ABCD1 OR4K17 IGHV4-4 SNHG17 RNA5SP125 LINC00458 FAM172A GLYR1 ANKRD29 EPM2A COL18A1-<br/> AS1 DEFB127 SGMS2 MXD3 TNFRSF10B PPAP2B HIGD1AP8 S100A7L2 SNORD45 SPECC1L-ADORA2A<br/> SHFM1 QTRTD1 LCE6A KIF18A LARP1B CIDP1 RN7SL743P CBLN4 ADH1A CDC73 SOX2-OT OR4C15<br/> MIR96 RNU2-27P SDF2 KMT2A CCDC144NL RN7SL435P XBP1P1 FAM210A TCEB1P32 RAD51L3-RFFL<br/> FBXW11 TDGF1 ERCC6 EFTUD1 IGKV2OR2-2 HSPE1P25 USP17L5 RPS20P5 DPP8 CDC16 ZFP64 EMCN-<br/> IT3 DDX51 MKRN3 LINC00349 SLC30A5 LINC01029 IMPG1 C22orf34 SUFU ARHGEF33 RN7SKP99<br/> SNORD114-20 DSCR4 WDR5 RANBP10 LINC01053 CST13P FAR2P4 FAM90A17P CSNK1G3 TMOD1<br/> RNF219 SMG6 ARHGEF6 SNORD115-41 CIZ1 ITGA11 WWTR1 GAS7 SNORD17 CIT AMOTL1 ZNF607<br/> HTR4-IT1 PEMT ARHGAP6 MCM3AP KCTD7 RNVU1-18 ZNF98 SLC2A3P1 ST3GAL3 PLCD3 MIR4307<br/> TCF7L2 APCDD1L-AS1 CHD5 JAK1 SETD7 HAUS8P1 CHAF1B RN7SKP96 PARP4P2 Y_RNA RNU6-286P<br/> ZMIZ1 DAP RNU6ATAC5P GBA3 RN7SKP238 IGKV2D-10 RPGR COL6A3 GPR125 DNMBP-AS1 STAR29<br/> LYSMD1 RN7SL766P PCSK5 LINC00537 FKS68 WBP1LP1 MUC5AC GRM4 PLB1 CLEC4A CKAP5 PRR12<br/> MAP2K1 AIM2 RNU6-724P TIMP2 LINC00911 CARF UBR2 GTF3C6 CCL15 GP5 SNX24 ZNF19 OR11A1<br/> TMEM132B SAE1 ANKRD44-IT1 CPSF1P1 SLC25A15P5 ENPP7P10 PTPLAD2 SAMD9 FLG-AS1 HNRNPKP3<br/> ZNF490 ARID4B CACNA2D4 CTSH RGPDI C14orf144 FBXL18 RCC2P8 MFNG PLEKHM2 ANKRD62P1-<br/> PARP4P3 STX16 RNU1-33P LINC00702 CDC5L SLC9B1 EFCAB1 CASQ2 LRRC37A7P KPNB1 TAS2R38<br/> FOXO3 MIR431 TRIM59 NF1P3 TTLL8 TTN-AS1 AHNK2 ACTR3BP3 MRPS31P2 LINC00284 ST7 TM4SF19<br/> RNU6-1193P MTUS2-AS2 KRBOX4 PCDHGA6 NXPH1 AR DDX3X RASA3 LINC00871 IGLV4-69 CDKN3<br/> ARHGEF10 RNU6-410P SERPINB12 GABRA3 E2F3 FRG2B TNFAIP8L2 NUDCD1 KLHL3 FGD6 MIR603<br/> LINC00687 SSX5 PPP4R4 DAPL1 RMI2 DAAMI MROH1 NPC1 PCDHGB1 RPL12L3 C17orf51 SMARCE1<br/> STK17B MLLT10P1 CXorf30 MBOAT2 CDKL1 SMEK2 ATMIN CENPM SCN9A CDK2AP2P2 RBL1 ATF7IP2<br/> CENPF BNIP3P2 C6 KCTD9P2 MTND2P2 MDM4 KRT23 SERHL FAM21C MAMLD1 SLC25A53 RNU7-174P<br/> HAPLN1 MIR3152 RAB7A MIR551B CHKB-CPT1B C10orf11 C5orf17 WDR63 SPEF2 MIR3118-1 CXorf22 </p> |
|--|--|------------------------------------------------------------------------------------------------------------------------------------------------------------------------------------------------------------------------------------------------------------------------------------------------------------------------------------------------------------------------------------------------------------------------------------------------------------------------------------------------------------------------------------------------------------------------------------------------------------------------------------------------------------------------------------------------------------------------------------------------------------------------------------------------------------------------------------------------------------------------------------------------------------------------------------------------------------------------------------------------------------------------------------------------------------------------------------------------------------------------------------------------------------------------------------------------------------------------------------------------------------------------------------------------------------------------------------------------------------------------------------------------------------------------------------------------------------------------------------------------------------------------------------------------------------------------------------------------------------------------------------------------------------------------------------------------------------------------------------------------------------------------------------------------------------------------------------------------------------------------------------------------------------------------------------------------------------------------------------------------------------------------------------------------------------------------------------------------------------------------------------------------------------------------------------------------------------------------------------------------------------------------------------------------------------------------------------------------------------------------------------------------------------------------------------------------------------------------------------------------------------------------------------------------------------------------------------------------------------------------------------------------------------------------------------------------------------------------------------------------------------------------------------------------------------------------------------------------------------------------------------------------------------------------------------------------------------------------------------------------------------------------------------------------------------------------------------------------------------------------------------------------------------------------------------------------------------------------------------------------------------------------------------------------------------------------------------------------------------------------------------------------------------------------------------------------------------------------------------------------------------------------------------------------------------------------------------------------------------------------------------------------------------------------------------------------------------------------------------------------------------------------------------------------------------------------------------------------------------------------------------------------------------------------------------------------------------------------------------------------------------------------------------------------------------------------------------------------------------------------------------------------------------------------------------------------------------------------------------------------------------------------------------------------------------------------------------------------------------------------------------------------------------------------------------------------------------------------------------------------------------------------------------------------------------------------------------------------------------------------------------------------------------------------------------------------------------------------------------------------------------------------------------------------------------------------------------------------------------------------------------------------------------------------------------------------------------------------------------------------------------------------------------------------------------------------------------------------------------------------------------------------------------------------------------------------------------------------------------------------------------------------------------------------------------------------------------------------------------------------------------------------------------------------------------------------------------------------------------------------------------------------------------------------------------------------------------------------------------------------------------------------------------------------------------------------------------------------------------------------------------------------------------------------------------------------------------------------------------------------------------------------------------------------------------------------------------------------------------------------------------------------------------------------------------------------------------------------------------------------------------------------------------------------------------------------------------------------------------------------------------------------------------------------------------------------------------------------------------------------------------------------------------------------------------------------------------------------------------------------------------------------------------------------------------------------------|

|  |                                                                                                                                                                                                                                                                                                                                                                                                                                                                                                                                                                                                                                                                                                                                                                                                                                                                                                                                                                                                                                                                                                                                                                                                                                                                                                                                                                                                                                                                                                                                                                                                                                                                                                                                                                                                                                                                                                                                                                                                                                                                                                                                                                                                                                                                                                                                                                                                                                                                                                                                                                                                                                                                                                                                                                                                                                                                                                                                                                                                                                                                                                                                                                                                                                                                                                                                                                                                                                                                                                                                                                                                                                                                                                                                                                                                                                                                                                                                                                                                                                                                                                                                                                                                                                                                                                                                                                                                                                                                                                                                                                                                                                                                                                                                                                                                                                                                                                                                                                                                                                                                                                                                                                                                                                                                                                                                                                                                                                                                                                                                                                                                                                                                                                                                                                                                                                                                                                                                                                                                                                                                                                                                                                                                                                                                                                                                                                                                                                                                                                                                                                                   |
|--|-----------------------------------------------------------------------------------------------------------------------------------------------------------------------------------------------------------------------------------------------------------------------------------------------------------------------------------------------------------------------------------------------------------------------------------------------------------------------------------------------------------------------------------------------------------------------------------------------------------------------------------------------------------------------------------------------------------------------------------------------------------------------------------------------------------------------------------------------------------------------------------------------------------------------------------------------------------------------------------------------------------------------------------------------------------------------------------------------------------------------------------------------------------------------------------------------------------------------------------------------------------------------------------------------------------------------------------------------------------------------------------------------------------------------------------------------------------------------------------------------------------------------------------------------------------------------------------------------------------------------------------------------------------------------------------------------------------------------------------------------------------------------------------------------------------------------------------------------------------------------------------------------------------------------------------------------------------------------------------------------------------------------------------------------------------------------------------------------------------------------------------------------------------------------------------------------------------------------------------------------------------------------------------------------------------------------------------------------------------------------------------------------------------------------------------------------------------------------------------------------------------------------------------------------------------------------------------------------------------------------------------------------------------------------------------------------------------------------------------------------------------------------------------------------------------------------------------------------------------------------------------------------------------------------------------------------------------------------------------------------------------------------------------------------------------------------------------------------------------------------------------------------------------------------------------------------------------------------------------------------------------------------------------------------------------------------------------------------------------------------------------------------------------------------------------------------------------------------------------------------------------------------------------------------------------------------------------------------------------------------------------------------------------------------------------------------------------------------------------------------------------------------------------------------------------------------------------------------------------------------------------------------------------------------------------------------------------------------------------------------------------------------------------------------------------------------------------------------------------------------------------------------------------------------------------------------------------------------------------------------------------------------------------------------------------------------------------------------------------------------------------------------------------------------------------------------------------------------------------------------------------------------------------------------------------------------------------------------------------------------------------------------------------------------------------------------------------------------------------------------------------------------------------------------------------------------------------------------------------------------------------------------------------------------------------------------------------------------------------------------------------------------------------------------------------------------------------------------------------------------------------------------------------------------------------------------------------------------------------------------------------------------------------------------------------------------------------------------------------------------------------------------------------------------------------------------------------------------------------------------------------------------------------------------------------------------------------------------------------------------------------------------------------------------------------------------------------------------------------------------------------------------------------------------------------------------------------------------------------------------------------------------------------------------------------------------------------------------------------------------------------------------------------------------------------------------------------------------------------------------------------------------------------------------------------------------------------------------------------------------------------------------------------------------------------------------------------------------------------------------------------------------------------------------------------------------------------------------------------------------------------------------------------------------------------------------------------|
|  | <p> RN7SL247P H2AFY ACTN4 RAB2A SNORD115-11 CEP250 CEACAMP6 TFIP11 GSKIP KRTAP4-12 GRAP2<br/> WASF1 HNRNPA1P71 U2SURP RNU6-1280P ITPK1 G3BP1 NUP155 CYP39A1 DNAJA1P5 NT5DC1<br/> RPL7L1P11 CUBNP3 AMZ2 FRAS1 PPP1R14A SNORD103B SIDT1 TECTA SNORD19B ARL2BPP8 TPRG1L<br/> BTN2A1 ASNSP1 STK32C DHX35 DEC1 LINC00520 SP140L G2E3 RPS15AP34 CCDC88B TMCC3<br/> RN7SL143P NFUIP1 TCL6 SAMSNI-AS1 PAPOLA FGFR1 CERK SPECC1L TET3 TMEM110-MUSTN1<br/> CASP6 LINC00693 MAGEB3 LRRN2 ZNF346-IT1 NQC4L MSANTD2P1 PTPN20B ATG2B FAM209A DAD1<br/> ENTPD3 NASP PIK3R5 CDC14A CTBP2P8 PALLD TRAV24 ENOX2 AGBL4 PARP16 DUX4L18 A1CF<br/> MACROD1 ASB13 USP32P2 hsa-mir-490 TMCO3 KPNA3 CASC16 IPO7P2 RHOC PPP3CA CHRNA5 RNU6-<br/> 1291P FAM63B SPIRE2 SPTSSA FTH1P27 MIR3118-6 BCLAF1 GOLGA3 NKD1 SCUBE3 ARHGAP39<br/> AKR1CL1 C1orf174 MTRR ZNF345 MYL12A WDR59 CCDC57 C10orf120 LRRC8D TRUB2 CEP170<br/> LINC00656 RPS15AP3 CASC8 TRIM41 PIN1 SLC38A10 MIR99A SNORD67 ULK4 RNU6-1132P GPR75-ASB3<br/> FAM90A9P DLX6-AS1 SORT1 LLGL2 SERPING1 TMEM120B CDH10 USP17L25 ASUN FAM211A-AS1 MZT1<br/> ZNF605 INTS4L1 OBP2A TBC1D3P5 C1orf168 ZNF41 HLA-DRA DNMT3B GUCY2C OR10T1P ZNF331<br/> SLC17A3 RAD18 EBPL CNN2P7 ZNF114P1 DEPD5 RYR1 VNIR33P DUX4L6 MIR219-1 LRRK2 UBTFL8<br/> CCDC181 MIR548AX KIAA0355 PCDHGA1 ZNF728 SLC38A4 PALM2 DYNC1H1 LSM12 PTGES RNU6-316P<br/> CD300A SLC35A5 PKHD1 KIF2A MTND2P28 MIR1281 SNORD114-17 FGF14-AS1 CBF4A2T2 KRTAP29-1<br/> AGGF1 DUX4L11 ITPRIPL2 C1orf141 ABCC11 NR2C2 MYH1 MGST1 SRD5A2 ZNF432 SLC16A14P1 SPG11<br/> RARRS2P4 FUBP1 STON1 AGGF1P3 PCA3 MMP20 DPH6-AS1 PRG3 GANC KRT43P MIR4533 DDX24<br/> SERTAD2 FAM90A10P OR5H8P ATP1A1 LINC01058 MIR487A OR4C9P LILRP2 GNAO1 SCN1A RNU4-59P<br/> RPS6KA6 STRC ILIRL2 SNN BCL2L15 OR4H6P PSMD6-AS2 BMP6 MAP3K7CL DNM1P51 MIR485<br/> TMEM212 PMS2P11 ANKRD62P1 TRAV6 RRP7B MRPS28 SEC63 TDRD10 GC TOR1AIP1 ADC POC1A<br/> TMEM170A TNF C21orf49 USP17L24 PHYKPL PDSS1 LINC00971 ATP8B4 GLDN NHLH2 CYP1D1P<br/> LINC00639 OR7E89P HIATL2 DSCR10 OR10V3P LRRC42 CCL14 KIR3DP1 ABCC2 TTC12 SELP CSPP1<br/> RNF185-AS1 RABGEF1 KIT MEMO1 RNU6-617P OR4A9P OSBPL3 PPOX ZNF439 MARVELD3 MIR1911<br/> MIR3687 OR8A2P LINC00842 ZNF177 MIP IGKV2-36 FAM19A1 POM121L9P MTUS2-AS1 RNU2-42P<br/> FAM81B LINC00229 LRP5 ARR3 RNU6-55P UBA6-AS1 ANKHD1-EIF4EBP3 SNORD115-23 MIR183 EFCAB5<br/> TERF1P5 CHN2 ZNF781 ESRP2 FSHR GAS8 NBEAP3 LCE2B MARCH3 GAD2 BMP15 C1GALT1 RUNX1T1<br/> SGK2 PIK3C2G SNORD115-40 NOL11 TRPM2 SPRR4 SLC30A7 SMCHD1 LINC00507 MED15P7 NRG1-IT1<br/> SLCO1B1 DPY19L3 CILP2 CCDC176 ICT1 EDA2R TNFRSF19 NAP1L6 MIR889 DENND2A CLN6 DMXL1<br/> SIK2 PTPN14 MXRA5 SCFD1 TRPC4 MTND1P31 THEM4 ZNF705A DMGDH PCBD2 TEX14 RRH TSPY26P<br/> DRP2 LINC00387 RNU7-176P PDZD7 ENPP2 PIK3CD FHL5 KCNMB3P1 FHAD1 GLULP5 VPS53 SLC5A3<br/> DHRS7B TRIM51 RUFY1 LINC00382 TMRSS4-AS1 IGHV3-41 RPS3AP41 BLOC1S5 ZNF965P SNORD115-38<br/> ART4 DCAF8L1 RNPC3 EGFEM1P PTPN9 ABCA12 FIGN P13 OR4C14P ARID2 BROX MARK2P8 GNA13<br/> FAM228B RNU6-78P LINC01043 DNM3-IT1 TRMT11 HMGB3P20 SNURF RPS23P5 BEND5 COL8A1<br/> ISCA1P3 ATXN3L BMS1P18 FAM85B GABRA1 LPHN3 REEP1 LINC00478 FAM90A22P CHMP4C MIR548F1<br/> KCNQ1 NR2F2 PSG7 IGHV8-67-3 BSG TEAD4 PDE7B RNU6-725P DTX4 SRRM1 RN7SL321P SLC38A6<br/> KIAA1109 USP40 IGLV1-38 RASSF8-AS1 DUSP23 HRNR IGKJ4 IPO8P1 BP1FB4 MRPL42P4 RAB24 NR3C2<br/> SERPINA2P MIR134 RNU6-1233P PRSS3P2 SNORD115-47 CRADD SHC2 NCOA5 EMCN RNA5SP478 BLNK<br/> VASH2 LINC00704 OR8U1 TPTE2P1 PTTG1P ADARB1 GGT1 VPS35 LINC01134 ZNF664 GPC4 HAS3<br/> SOD1P3 LRRC63 BPGM UBASH3B RPL18P13 TTC40 RASA3-IT1 PAGE1 SERPINB8 PPP2R4 REXO1L9P<br/> LINC00276 CDRT1 RN7SKP6 LINC00032 VSTM2B TMEM68 GTF2IP3 SNORD103A ENPP7P5 AAR2 ACTR3B<br/> NEK5 ASL C1orf173 PM20D1 KLHDC7A CMSS1 PHC1 SLC22A23 PLCH1 CACNA1C-IT3 NAMPT PCNXL4<br/> PCDHGB7 ZNF493 BPESC1 RNASE13 GLRA1 MIR376A1 RNU4-24P CTNBNB1P1 TEPI YAF2 WDR95P<br/> KIDINS220 KIAA1644 SMPD4P2 TBCE CT49 FNIP2 G3BP2 HNRNPA2B1 GADD45A MIR214 MGC4294<br/> UGGT2 STIM2 PTEF SNORD23 RNU6-1327P NF1P1 PLAT FAM201B SNORD54 ADORA2A-AS1<br/> RNA5SP492 EIF3A C10ORF68 HSI1BP3-IT1 PTPRF SEC24B DNM3OS RNU6-618P IGSF11-AS1 ZNF268<br/> MYLK RN7SKP60 UNC5C PRIMA1 CHI3L2 MTMR4 MIR648 NKAIN1P1 TTC39A POLR2F KRTAP5-8<br/> CSGALNACT1 LYVE1 RNU6-1005P PTPN20A KRTAP20-1 SMAD1 SLC22A15 LST3 LINC00523 ATP1A4<br/> RPL21P6 ANKHD1 LINC00189 C2orf43 TTC8 BRD7 FCF1P10 SNORD6 WDR7 SNORD114-16 DIAPH2-AS1<br/> OR52N5 RBMX2P1 MGAT4C ZNF501 TSPEAR-AS1 HMG20A CEP85L ARL6IP5 TCEB3CL2 ARFIP1 RNU4-<br/> 60P PAPP-AS1 PLSCR1 CD163L1 RNA5SP79 TRPV4 NOX5 C1orf167 EEF1A1P1 KCNJ12 ATP5J HDAC8<br/> OR51AB1P SRP54 OSBPL1A STARD4 NLRP11 DNAAF2 ADORA3 LINC00563 PIK3R2 SH2D7 ANKRD44<br/> HYAL4 SP2 CYP3A43 SMPD3 PDE7A KALI CYTIP CYBB SPTA1 ZNF483 ZCCHC17 KCNJ3 TBX18<br/> PCDHGA8 DPP9 RGL2 NID2 DHRS4L2 SUZ12 PDE6B SPA17 ZNF729 MIR548AS LHFP TSPY5P TMEM189-<br/> UBE2V1 PJA1 IGLVIV-65 FAM76A RNU6-721P DKFZP761J1410 ZFP2 VWC2 BZW2 GUCY2F IGHV11-40-1<br/> ERLIN1 KRTAP6-1 SMIM2-AS1 CACNA1C-IT1 KRTAP9-2 VWA8P1 ADTRP RBFOX2 CRMP1 PDE4B ZNF507<br/> OR4C2P SNORD116-18 ZNF26 PCDH17 PHF8 TFPI USP17L9P MIR323B TDRD6 CA3 PQLC1 DDX59<br/> CYB5R2 GOSR2 LRRC20 DSCR9 ANKRD20A11P LPPR1 LCP2 RMRPP4 ISOC1 RARRS2P9 PET117 IL4R<br/> TMEM123 MIR653 SHROOM4 SCO2 C13orf35 TM4SF1 IGHV3-29 SMG7 CT64 PRPSAP2 PAXBP1<br/> ANKRD13A ZCCHC11 RNU6-713P KIAA1211 RPS27L TGFB3 MCUR1 UMOD MAP3K7 SNORA31 CENPP<br/> C16orf80 SLC7A1 PTPRM ACTR3BP5 ADAM17 USP36 CHRNA3 TMEM186 AK5 NCOA2 EGFLAM-AS1<br/> N4BP1 SLC35F2 BNIP3L LCP1 GALNT8 PCDHGB6 RFPL4AP7 RASSF8 OR7D1P USP12 WBP11P1 OR6N1<br/> IMPDH1 KATNAL2 C9orf40 KCNH7 ASXL1 GNG5P5 KRTAP15-1 ELTD1 LCE2C KMO RNU7-114P NUDT4<br/> SNORA70C RNU1-104P CLDN1 PCTP UBE2U TSNAX-DISC1 ABCC1 NXPE2P1 IGHV7-56 SPRR2G C14orf64<br/> RBAK-RBAKDN WDR83OS CDKL5 BCRP1 NSUN7 INPP4A PIP5K1B IGF2R C21orf90 PTPRU AFTPH<br/> NHSL2 ADPGK SBF2-AS1 SIAE RPL3P9 TGFB111 SNRNP200 SOBP TRBV7-5 TESK2 SHOX2 NPY4R MIR381<br/> ZNF252P ZNF207 KLF13 RN7SKP100 NMNAT1P4 ANKRD32 SCMHI MARK2P9 KIRREL3-AS1 POLD3<br/> RHEBP3 USP32P1 ZNF91 SNORD115-10 BAALC KIAA1598 JDP2 MORF4L1 POU2F1 PMP22 FAM108A8P<br/> ELK3 OLFM3 INADL GPR139 P2RX7 COX5BP6 ADNP2 PLEKHA5 OR5AK4P GAPDHP67 IL18R1 SPTBN4<br/> FAM90A21P MARCH11 AMOT ARMCX4 LINC00317 CCDC7 HGFAC RGS7BP SNORA57 LEPREL1 FSD1L<br/> PPARGC1B LPHN2 MTND6P4 PLEKHA6 KDSR BMS1P17 TMEM56 ESR2 LACTB ENPP7P6 MTND5P14<br/> RALBP1 IGHV3-47 RNU6-16P ZCWPW2 KAT7 HNRNPA1L2 HGF MIR376C C8orf87 MYBPC2 REEP2 </p> |
|--|-----------------------------------------------------------------------------------------------------------------------------------------------------------------------------------------------------------------------------------------------------------------------------------------------------------------------------------------------------------------------------------------------------------------------------------------------------------------------------------------------------------------------------------------------------------------------------------------------------------------------------------------------------------------------------------------------------------------------------------------------------------------------------------------------------------------------------------------------------------------------------------------------------------------------------------------------------------------------------------------------------------------------------------------------------------------------------------------------------------------------------------------------------------------------------------------------------------------------------------------------------------------------------------------------------------------------------------------------------------------------------------------------------------------------------------------------------------------------------------------------------------------------------------------------------------------------------------------------------------------------------------------------------------------------------------------------------------------------------------------------------------------------------------------------------------------------------------------------------------------------------------------------------------------------------------------------------------------------------------------------------------------------------------------------------------------------------------------------------------------------------------------------------------------------------------------------------------------------------------------------------------------------------------------------------------------------------------------------------------------------------------------------------------------------------------------------------------------------------------------------------------------------------------------------------------------------------------------------------------------------------------------------------------------------------------------------------------------------------------------------------------------------------------------------------------------------------------------------------------------------------------------------------------------------------------------------------------------------------------------------------------------------------------------------------------------------------------------------------------------------------------------------------------------------------------------------------------------------------------------------------------------------------------------------------------------------------------------------------------------------------------------------------------------------------------------------------------------------------------------------------------------------------------------------------------------------------------------------------------------------------------------------------------------------------------------------------------------------------------------------------------------------------------------------------------------------------------------------------------------------------------------------------------------------------------------------------------------------------------------------------------------------------------------------------------------------------------------------------------------------------------------------------------------------------------------------------------------------------------------------------------------------------------------------------------------------------------------------------------------------------------------------------------------------------------------------------------------------------------------------------------------------------------------------------------------------------------------------------------------------------------------------------------------------------------------------------------------------------------------------------------------------------------------------------------------------------------------------------------------------------------------------------------------------------------------------------------------------------------------------------------------------------------------------------------------------------------------------------------------------------------------------------------------------------------------------------------------------------------------------------------------------------------------------------------------------------------------------------------------------------------------------------------------------------------------------------------------------------------------------------------------------------------------------------------------------------------------------------------------------------------------------------------------------------------------------------------------------------------------------------------------------------------------------------------------------------------------------------------------------------------------------------------------------------------------------------------------------------------------------------------------------------------------------------------------------------------------------------------------------------------------------------------------------------------------------------------------------------------------------------------------------------------------------------------------------------------------------------------------------------------------------------------------------------------------------------------------------------------------------------------------------------------------------------------------------------------|

|  |  |                                                                                                                                                                                                                                                                                                                                                                                                                                                                                                                                                                                                                                                                                                                                                                                                                                                                                                                                                                                                                                                                                                                                                                                                                                                                                                                                                                                                                                                                                                                                                                                                                                                                                                                                                                                                                                                                                                                                                                                                                                                                                                                                                                                                                                                                                                                                                                                                                                                                                                                                                                                                                                                                                                                                                                                                                                                                                                                                                                                                                                                                                                                                                                                                                                                                                                                                                                                                                                                                                                                                                                                                                                                                                                                                                                                                                                                                                                                                                                                                                                                                                                                                                                                                                                                                                                                                                                                                                                                                                                                                                                                                                                                                                                                                                                                                                                                                                                                                                                                                                                                                                                                                                                                                                                                                                                                                                                                                                                                                                                                                                                                                                                                                                                                                                                                                                                                                                                                                                                                                                                                                                                                                                                                                                                                                                                                                                                                                                                                                                                                                                                  |
|--|--|------------------------------------------------------------------------------------------------------------------------------------------------------------------------------------------------------------------------------------------------------------------------------------------------------------------------------------------------------------------------------------------------------------------------------------------------------------------------------------------------------------------------------------------------------------------------------------------------------------------------------------------------------------------------------------------------------------------------------------------------------------------------------------------------------------------------------------------------------------------------------------------------------------------------------------------------------------------------------------------------------------------------------------------------------------------------------------------------------------------------------------------------------------------------------------------------------------------------------------------------------------------------------------------------------------------------------------------------------------------------------------------------------------------------------------------------------------------------------------------------------------------------------------------------------------------------------------------------------------------------------------------------------------------------------------------------------------------------------------------------------------------------------------------------------------------------------------------------------------------------------------------------------------------------------------------------------------------------------------------------------------------------------------------------------------------------------------------------------------------------------------------------------------------------------------------------------------------------------------------------------------------------------------------------------------------------------------------------------------------------------------------------------------------------------------------------------------------------------------------------------------------------------------------------------------------------------------------------------------------------------------------------------------------------------------------------------------------------------------------------------------------------------------------------------------------------------------------------------------------------------------------------------------------------------------------------------------------------------------------------------------------------------------------------------------------------------------------------------------------------------------------------------------------------------------------------------------------------------------------------------------------------------------------------------------------------------------------------------------------------------------------------------------------------------------------------------------------------------------------------------------------------------------------------------------------------------------------------------------------------------------------------------------------------------------------------------------------------------------------------------------------------------------------------------------------------------------------------------------------------------------------------------------------------------------------------------------------------------------------------------------------------------------------------------------------------------------------------------------------------------------------------------------------------------------------------------------------------------------------------------------------------------------------------------------------------------------------------------------------------------------------------------------------------------------------------------------------------------------------------------------------------------------------------------------------------------------------------------------------------------------------------------------------------------------------------------------------------------------------------------------------------------------------------------------------------------------------------------------------------------------------------------------------------------------------------------------------------------------------------------------------------------------------------------------------------------------------------------------------------------------------------------------------------------------------------------------------------------------------------------------------------------------------------------------------------------------------------------------------------------------------------------------------------------------------------------------------------------------------------------------------------------------------------------------------------------------------------------------------------------------------------------------------------------------------------------------------------------------------------------------------------------------------------------------------------------------------------------------------------------------------------------------------------------------------------------------------------------------------------------------------------------------------------------------------------------------------------------------------------------------------------------------------------------------------------------------------------------------------------------------------------------------------------------------------------------------------------------------------------------------------------------------------------------------------------------------------------------------------------------------------------------------------------------------------|
|  |  | <p> FAM220BP ACSL4 RNA5SP303 CAPZB SATB1 IGHV4-31 VPS45 OR10N1P ST20-MTHFS COMT ZNF440<br/> ROS1 EFCAB11 SLC5A4 NRG1-IT2 SNX19P1 KRT75 SLC6A17 RNU1-39P RNA5SP405 ZBED5 TMEM63A<br/> MAGEB2 DUX4L16 S1PR3 CKAP4 SLFN12L L3MBTL1 SNORA16 PGK1 RNASEH1 WLS ERVK3-1 RLF<br/> IGLV1-36 MIR656 ANKS1A RPL10P3 PRCP SPIB RN7SKP86 MYO1B ZPLD1 HPN PANX1 FGL2 DCHS2<br/> SOS1 MIR767 EHF EEF1E1-BLOC1S5 ZNF189 KLRF2 SLC28A3 RPS15AP1 RNU6-1320P RASSF3 KCNQ5-<br/> IT1 CYCSP6 KRTAP9-3 ACOT1 SNORD116-19 LGR6 ZBTB34 RNU6-954P SQORDL BAI3 DPYSL2 SYNPO2<br/> EXOC5 MIR381HG NGF OR4Q1P SLC01B3 DSCR8 PTPDC1 CYLC2 PPM1J TRIM22 UBE2E3 SAMD3<br/> VEPH1 FAM129A OOSP1P2 BCAN AKAP7 TGM2 BASP1 MIR4535 RPL21P1 ZNF202 ACYP2 MARCH10<br/> BDNF-AS GRK6 FAM46B LINC00492 MIR382 C7orf69 ZNF277 RNA5-8SP7 7SK LRRC8C SNX18P4 RNU6-<br/> 1066P CALML4 KRTAP4-3 KRT39 MIR5704 MIR1276 SYT2 LINC00442 DPP4 GUSBP3 DICER1 ZNF148<br/> ZNF141 SLC26A8 RNY4P23 MYH16 AQP10 SULT1A4 SEC16B GGT8P C5orf38 SLC16A12 THOC2 TAF1B<br/> LINC00898 COL15A1 CACHD1 HDAC5 TAF7L CREG2 FAM27E3 NUP62CL REEP3 TCAM1P MARK1<br/> MGST3 BDNF MIR320B2 BTRC EIF4EBP3 IQCH ACBD6 RBM4 C15orf43 MIR433 FNIP1 DSCR4-IT1<br/> TSPAN8 IGHV17-44-2 MRPS11 MAEL MRPS17 NUP153 MYH9 LINC01057 RNU6-127P RNU6-469P<br/> TMEM233 RNA5SP465 SNORD109B BDKRB2 RNF180 ZNF665 MEF2A DUX4L5 NDST4 MIR543 KATNA1<br/> ADORA2A FAM90A23P MRV11-AS1 MIR556 STIM1 TUBA3C FAM216A GPATCH2L BACH1-IT3 TSC22D3<br/> SWT1 PTC2P1 IGLJ1 EEFSSEC MROH7 ARF1 FLNC PLCH2 TMEM261 PPIAP22 JAG1 CNN3 MIR105-2<br/> LINC01065 AKNAD1 FAM27A IFT80 BMSIP13 RNA5SP61 LINC00879 CXOC6P10 AKR1C2 GPALP1<br/> RN7SL373P HSPA4L ZNF527 RPL21P11 NUPL1 FAM208B LITAF DYM OR7A5 OR5J7P LRRC3-AS1 CUZD1<br/> RNF219-AS1 LINC00351 CHST13 ANKRD20A18P GOLGA1 LINC00857 VDACC2P1 SEPT7P5 GUCY1B3<br/> SNORD114-19 NR3C1 PPIAP6 MIR300 BRF1 FAM108A10P JRKL-AS1 ACTR3BP6 FAM222B KCNB2 MCM3<br/> LINC00658 C17orf75 ZNF585B TENM1 THTPA OR4C5 CYP3A54P CCDC170 HNRNPA1P40 CBLB KIAA1407<br/> LARGE VPS39 CFL1P6 SNAP25 MTFMT ANO1 REG1P JAKMIP1 MIR5582 IGHV1-46 PCMTD1P1 RIMS3<br/> KRT76 RTFDC1 MIR4290 MIR410 CDC42BPG IGHV1-18 ADRA1B LTB LINC01101 OR4A41P PCAT6 ZFPM1<br/> RNU7-145P GDAP1 PRKARIA RPL8P2 RNA5SP222 ZRAN1 KKR7 DISP1 PRB2 HS6ST2 MYCT1 CPT1B<br/> MS4A5 DCST2 GPN3 TFAP2D TNMD SPATA6 CYP7B1 FAM212B STXBP5 TBXAS1 OSBPL9P4 KXD1 PRKX<br/> RN7SL674P ARMC7 FCRL2 FAM196B SULT1C2P1 H3F3C BMSIP9 PCK1 KBTBD11 NPR3 HBD MIR4743<br/> REVI FAM220A RNU6-1269P TTLL11-IT1 GNG4 CNTNAP4 TTC32 LINC00393 RGCC NOX4 IGKV1-37 VWF<br/> CYP2E1 RNU6-1049P UBE2Q2P11 LINC01154 RNU6-157P MEGF9 MIR5190 OR4C12 SNORA32 RNU1-11P<br/> CYB5D2 STK33 PGM5P2 SNUPN QRFP TRIM51DP PCDHGA9 JPH4 NAPEPLD MIR3648 CISD2 GCNT7<br/> HRASLS5 RN7SL484P FAM155A snoZ6 FCF1P9 OR4Q2 GACAT1 C20orf196 NCORIP2 CYYR1 ILIRAP<br/> UBXN2B KIR3DL1 TXNDC5 RALGDS HNRNPA1P58 SETD5-AS1 DEF6 MTAPP2 WRAP73 RPH3AL ERI2<br/> LINC01076 MANEAL SNORD115-24 LRRTM1 MTNDS5P11 EIF4E2P1 FAM90A7P SCEL BCOR GRIA3<br/> RNA5SP488 NSUN3 BHLHB9 ILF3 GOPC OR5E1P LINC00457 MIAT POLR3C SLC35F3 DCDC2 NANP<br/> ANKRD20A12P DYNCL12 RN7SKP285 AGGF1P4 LGALS14 ZFP82 LINC00418 CPED1 GAB2 CEP89<br/> DIS3L2 FREM2 hsa-mir-6723 NOS2P3 SLC7A8 MOGAT2 MYO5BP3 S100A11 CLASP2 EFHC2 DOT1L<br/> LHFPL3-AS1 SNORD113-2 SMYD2 PVRL2 OR10R2 TMEM194B ONECUT3 ZMAT3 OR4H12P LIMK2<br/> MIR1185-2 MTATP6P1 TRPM4 ZNF558 LINC00632 MLLT10P2 C11orf30 ICK FAM227B LAMP5 EFCAB4B<br/> PSPC1P2 KIAA0040 RN7SL683P HLCS-IT1 KRT2 C1orf95 RBKS FERMT2 DNAJC6 MIR105-1 DSG4<br/> KATNBL1 TPD52 U3 CPNE8 DACH2 PGM2 LINC00521 STX3 MIAP AGBL4-IT1 ZC3H13 ZNF610 TAX1BP1<br/> WBP1L DNAH100S H2BFM KCNK2 KDR BRD9 PCDHGA2 OR2M5 OGT RNF207 FAM13C<br/> HNRNPA1P68 KCNT2 CCDC36 GZMH DENND5A CDK2AP2P3 OR4K13 SHCBP1 PNPT1P1 TNC<br/> LINC00856 IGHV3-32 PML EBAG9 ADAM6 RN7SKP5 DAB2 FAM101A TTLL12 AFF2 RFC3P1 NCKAP5<br/> DNM1P46 THAP7-AS1 RN7SL552P MGLL FAM27E2 FAM83G LINC00609 RNA5-8SP5 TRAPP12 FAP NSF<br/> EBF4 ANKRD20A2 NFASC RPS4XP15 OR52U1P TPT1P5 LINC01141 TMSB15B ERICH2 OPTN RN7SKP85<br/> METTL9 ATP5O RN7SL50P MAP2K5 ZNF663P PCDHGB8P RAI1 RPS20 SEPP1 CPEB2 LINC01146<br/> TMEM56-RWDD3 ZNF229 LRRK1 DYNAP GRIK1-AS2 RPL7AP28 DNMT1 MTND1P32 PIWIL4 RAP1B<br/> MRGPRG ZNF571 BRIP1 WIPF2 UBFD1P1 SNORD116-16 SBF2 DIAPH3-AS2 CADM3 PPM1B PIP5K1P2<br/> KRTAP9-8 KIR2DL3 FOXRED2 IGHV3-65 GGF7 SLC15A1 DGUOK-AS1 SNORD116-26 FMNL3 SNAP23<br/> ANXA8L1 PPAPDC1A CHST9 ZDHHC9 USP17L26 NLRP2 FLT3 GALK2 CEP97 SNX18P15 PCDH19 JMY<br/> ZNF451 SRIP1 ARL2BPP5 MIR514A1 MRPL39 OR11H13P SRPK2 CACNA1A MEG9 RNU6-368P MCM9<br/> RNU6-405P ST7-OT4 EDA CCDC144CP UPK3A SPCS2P4 IGDCC4 RN7SKP126 PRB1 MGME1 CCDC144B<br/> EDDM3A LINC00491 CTXN2 RN7SL327P RPS26P30 OR11K2P ABCC10 RARRES2P1 EPG5 TTC34 COL2A1<br/> PTH2R RPA1 EEF1E1 PPIAP14 MIR4760 NAP1L4P1 AKR1B10P1 ZNF346 KHDRBS3 TPK1 MYO5BP1 SOX8<br/> KIAA0195 ATXN8OS MTHFS CALCRL ABAT SLC22A25 EGFL6 ZNF674 LGALS9 MIR136 MIR495 CYP1B1-<br/> AS1 CELSR1 TNNI3K THBS2 LINC00271 TPO GBAS TASIR1 TVP23C-CDRT4 RNU6-466P RPS2P44<br/> TMEM138 TRBV6-8 C9orf131 TMEM131 GTDC1 RNU6-230P TRIM51CP MYH7 OR8K5 RNA5SP497<br/> RNASEH1 MIR4480 PAPSS1 BICC1 CRNN NBPFI1 POLN DISC1-IT1 KCNK13 MTND2P4 SERHL2 DUX4L4<br/> DDC MIR548AL RNU6-614P MS4A4E SNORD114-18 HNRNPA1P53 FLNB-AS1 ENPP7P1 SNORA25 POTEH-<br/> AS1 SERTM1 SNORA70 STK35 LINC00707 YWHAQP9 RRM1 MFSD12 PDE11A TSPAN9 ARID4A SYCP2<br/> CLYBL KCNC4 TSPAN1 USP32P3 ACIN1 LECT2 OR4C6 RAB30 CEP41 GNB5 PRKAR1B LINC00972 UBTD2<br/> IQCJ ZSWIM7 CCDC88C SPATA5 B4GALT3 POU2F3 IGHV3-60 RNA5SP490 NVL PPFIBP2 LINC01030<br/> CENPV SMIM20 DTX2P1-UPK3BP1-PMS2P11 CTBP2 MYH8 SNORD113-1 TTN ZNF525 NCALD RNF144A-<br/> AS1 PGM5P1 ZFYVE21 CACNA1C-IT2 ZNF93 ZNF337 RAD51D ADH1B MIR369 SARDH EMR4P CPA5<br/> AMY2B PDS5A NCAPH2 CUL2 KIAA0319 RNASET2 C6orf106 CCDC146 MIR4273 FAM227A CLRN1-AS1<br/> FAM221A CDK19 NCMAP SCN1A KCNE2 PPP2R3C CAB39L LINC00378 CFB QSOX1 ZNF443 DUX4L14<br/> OR5V1 TMEM55A IGHV17-28-1 SYT17 ACTA2-AS1 FOXP1 MAS1LP1 SNORA80 SNRPD3 RBMX2P3 OR4M1<br/> FRG1B ADCK3 FAM114A1 SNORD19 FDXR PAX3 PNLIPIR1 DEFBI22 PARP4P3 LRP4 KSR2 TMTC4<br/> NOVA1-AS1 MROH7-TTC4 IGHV3OR16-12 SPATA13 ZNF736 RNA5SP518 RARRES2P2 GUSBP6 TUBGCP6<br/> MORN2 GAREM CST2 PLAC4 HEPACAM2 BLOC1S6 MTND4P14 F11R MIR432 RFX4 RPL18AP14<br/> CEACAMP10 CACNA1C-AS2 EIF3FP1 RNU1-117P OR5B19P LRRC16A LARP4P SNORD115-45 MKL1 SAA2<br/> ATP6VID ADPGK-AS1 LAMA4 SNORD115-19 PMEPA1 C1orf94 RN7SL659P IGHV4-55 TMEM185A ZZZ3 </p> |
|--|--|------------------------------------------------------------------------------------------------------------------------------------------------------------------------------------------------------------------------------------------------------------------------------------------------------------------------------------------------------------------------------------------------------------------------------------------------------------------------------------------------------------------------------------------------------------------------------------------------------------------------------------------------------------------------------------------------------------------------------------------------------------------------------------------------------------------------------------------------------------------------------------------------------------------------------------------------------------------------------------------------------------------------------------------------------------------------------------------------------------------------------------------------------------------------------------------------------------------------------------------------------------------------------------------------------------------------------------------------------------------------------------------------------------------------------------------------------------------------------------------------------------------------------------------------------------------------------------------------------------------------------------------------------------------------------------------------------------------------------------------------------------------------------------------------------------------------------------------------------------------------------------------------------------------------------------------------------------------------------------------------------------------------------------------------------------------------------------------------------------------------------------------------------------------------------------------------------------------------------------------------------------------------------------------------------------------------------------------------------------------------------------------------------------------------------------------------------------------------------------------------------------------------------------------------------------------------------------------------------------------------------------------------------------------------------------------------------------------------------------------------------------------------------------------------------------------------------------------------------------------------------------------------------------------------------------------------------------------------------------------------------------------------------------------------------------------------------------------------------------------------------------------------------------------------------------------------------------------------------------------------------------------------------------------------------------------------------------------------------------------------------------------------------------------------------------------------------------------------------------------------------------------------------------------------------------------------------------------------------------------------------------------------------------------------------------------------------------------------------------------------------------------------------------------------------------------------------------------------------------------------------------------------------------------------------------------------------------------------------------------------------------------------------------------------------------------------------------------------------------------------------------------------------------------------------------------------------------------------------------------------------------------------------------------------------------------------------------------------------------------------------------------------------------------------------------------------------------------------------------------------------------------------------------------------------------------------------------------------------------------------------------------------------------------------------------------------------------------------------------------------------------------------------------------------------------------------------------------------------------------------------------------------------------------------------------------------------------------------------------------------------------------------------------------------------------------------------------------------------------------------------------------------------------------------------------------------------------------------------------------------------------------------------------------------------------------------------------------------------------------------------------------------------------------------------------------------------------------------------------------------------------------------------------------------------------------------------------------------------------------------------------------------------------------------------------------------------------------------------------------------------------------------------------------------------------------------------------------------------------------------------------------------------------------------------------------------------------------------------------------------------------------------------------------------------------------------------------------------------------------------------------------------------------------------------------------------------------------------------------------------------------------------------------------------------------------------------------------------------------------------------------------------------------------------------------------------------------------------------------------------------------------------------------------------------------------|

|  |  |                                                                                                                                                                                                                                                                                                                                                                                                                                                                                                                                                                                                                                                                                                                                                      |
|--|--|------------------------------------------------------------------------------------------------------------------------------------------------------------------------------------------------------------------------------------------------------------------------------------------------------------------------------------------------------------------------------------------------------------------------------------------------------------------------------------------------------------------------------------------------------------------------------------------------------------------------------------------------------------------------------------------------------------------------------------------------------|
|  |  | <p> <i>UBE3C CCDC92 RPSAP55 MYO5BP2 PEX5L TERF1P1 OR8L1P CYB561A3 RNU6-602P SLC2A9 UCHL1-AS1 PRAMEF12 RNU6-249P LARP4B HGSNAT RAG2 KIAA0754 LCE2A LRCH3 FMNL2 CAPN7 CCL3 RNU6-540P RNU6-458P KDM3A snoU13 MYOM3 CCDC73 SYNPR-AS1 FAM110B CES1P1 SNORD115-34 LGR4 SYT9 SULT1B1 DHRS4-AS1 LINC00534 RFPL4AP5 VSIG10 TRDC RPS20P1 SLC38A7 CYP4F29P SPINT2 SLC22A10 CASK RNF128 PXX SLC04C1 DENND2D CP LINC00973 FAM160A1 OLFML1 STAG3L5P-PVRIG2P-PILRB SCNM1 AMD1 LCE4A ZNF562 SPRR2E LRRC3B DNAJA1P4 KRTAP19-3 CCNYL2 MARCH1 TUBB1 GRAMD3 TP63 ARMCX2 GRIA2 ANXA11 NUSAP1 ANKRD23 CCDC11P1 MIR3713 IFNA8 TRMU OR4K11P TP53TG3B USP3 LINC00940 HBG1 C3orf67 ADRBK2 VSTM1 LINC00353 ZNF622 SELO DHRS2 SNORD115-39 RXFP2 TRDV3 EXOC6 SNORD115-25</i> </p> |
|--|--|------------------------------------------------------------------------------------------------------------------------------------------------------------------------------------------------------------------------------------------------------------------------------------------------------------------------------------------------------------------------------------------------------------------------------------------------------------------------------------------------------------------------------------------------------------------------------------------------------------------------------------------------------------------------------------------------------------------------------------------------------|

**Table S5.** GO associations with biological processes (GO Profiler) of 1486 rDNA-contacting genes common to K562 and HEK293T cells. Related to Figure 1D.

| GO.ID      | Description                        | padj                   | Genes                                                                                                                                                                                                                                                                                                                                                                                                                                                                                                                                                                                                                                                                                                                                                                                                                                                                                                                                                                                                                                                                                                                                                                                                                                                                                                                                                                                                                                                                                                                                                                                                                                                                                                                                                                                                                                                                                                                                                                                                                                                                                                                                                                                                                                                                              |
|------------|------------------------------------|------------------------|------------------------------------------------------------------------------------------------------------------------------------------------------------------------------------------------------------------------------------------------------------------------------------------------------------------------------------------------------------------------------------------------------------------------------------------------------------------------------------------------------------------------------------------------------------------------------------------------------------------------------------------------------------------------------------------------------------------------------------------------------------------------------------------------------------------------------------------------------------------------------------------------------------------------------------------------------------------------------------------------------------------------------------------------------------------------------------------------------------------------------------------------------------------------------------------------------------------------------------------------------------------------------------------------------------------------------------------------------------------------------------------------------------------------------------------------------------------------------------------------------------------------------------------------------------------------------------------------------------------------------------------------------------------------------------------------------------------------------------------------------------------------------------------------------------------------------------------------------------------------------------------------------------------------------------------------------------------------------------------------------------------------------------------------------------------------------------------------------------------------------------------------------------------------------------------------------------------------------------------------------------------------------------|
| <b>BP</b>  |                                    |                        |                                                                                                                                                                                                                                                                                                                                                                                                                                                                                                                                                                                                                                                                                                                                                                                                                                                                                                                                                                                                                                                                                                                                                                                                                                                                                                                                                                                                                                                                                                                                                                                                                                                                                                                                                                                                                                                                                                                                                                                                                                                                                                                                                                                                                                                                                    |
| GO:0009653 | anatomical structure morphogenesis | 2.2643101764575657e-30 | <p> CD44, SEMA4D, RPS6KA5, TAOK3, PRKCB, ANKRD6, FBXO31, BCL2, MM P16, COL18A1, THRB, DNAH11, CDC42EP3, NCAM1, CDH8, ATP10A, ZNF568, GRIP1, ASTN2, TANC2, NTN4, BICD1, KALRN, USH2A, FLI1, ME GF11, EPB41L3, LAMA1, PARVB, CDH11, NRXN1, IL1RAPL1, WPCP, LAMA3, SMOC2, ZDHHC17, KCNH1, CACNA1C, EXOC4, CTNNA1, MYO9A, NTRK2, FOXN3, THSD7A, TIAM2, CNTN1, ZNRF3, PALMD, MEOX2, ENPEP, NRG3, SLC24A4, GAS2, NUMB, MTPN, SOX6, PTGFRN, UNC5D, DLG5, CFDP1, PGM5, ATRNL1, CPE, CALD1, ARHGAP24, SLIT2, MYLK3, ROR1, ADAMTSL1, AKT3, CRB1, ALPK2, HECW1, AFF3, ERBB4, KANK1, ATRX, DMRT1, MACF1, RAP1A, TRIO, MYO3B, CHSY1, EXT2, NOS1, CCDC141, CNTN4, SLC40A1, FGD4, ETS2, ITGA1, HIRA, ITGA8, RUNX1, ALDH1A2, FAM171A1, PEAK1, EYA1, CDH18, FRMD6, PLS1, ANK2, ZBTB16, SLIT3, ROBO1, ANKRD11, EGFLAM, PAK3, OVOL2, MLLT3, CHODL, GABPA, PRICKLE2, BBS2, MYOM2, MYO3A, NUBPL, SOX5, DSCAM, DNMBP, KDM4C, SDK1, SLC1A1, EPHA6, NTN1, NR5A2, IGF1R, WDR72, NLGN1, SHROOM3, JAM2, ALX4, CNTNAP2, MAP2, CFTR, FLRT2, PTPRO, INSR, COBL, CUX1, ANK3, CDH12, TBCD, GPC6, RELN, ADAMTS5, MYO18B, CDH4, TNFR, VAV3, CNTN6, APP, ADAM12, PAK1, IGF2BP3, ADCK1, HCN1, FRY, EPS8, TENM4, CECR2, GHR, RIPK4, RIN2, MEIS2, STARD13, LRRC4C, ALCAM, ADAMTS16, NEBL, RARB, FRYL, TIAM1, PBX1, PHACTR1, SLC39A12, DISC1, FMN1, ZFPM2, VSTM4, SVEP1, EDAR, EGF, FYN, EPHA7, STK3, S100B, PCDH15, ESR1, ARHGAP12, CNTN5, LRIG1, PRKACB, RIMS1, POR, WWOX, EPHB1, FHOD3, GREB1L, EFEMP1, AJAP1, HERC1, DOCK1, FLT1, EXT1, EFNA5, TRPC5, PPFIA2, TENM3, MARK2, ATF2, GRID2, LRP2, SEMA6D, NTF3, FER, NTNG1, SGCD, TMEM108, RAPGEF2, GTF2I, PRKCQ, KIRREL3, NRXN3, KRT25, DLC1, ATP8A2, UBE3A, AUTS2, EPHB2, PDLIM5, PRTG, CTNND2, COL22A1, SETD2, PACSIN2, SDCCAG8, FLVCR1, NRP1, CDH13, RPGRIP1, DAB1, SEMA3A, SEMA3E, DCLK1, KIF16B, CDH2, ARID5B, TANC1, HDAC9, PIK3R3, FSTL4, MTOR, ROR, FBLN1, SH3BP1, FHL2, TTC39C, SPRED1, SIPA1L3, FLNB, PAPP A2, CSMD1, GLI3, RXFP1, FBN1, TBX15, BMPER, HMGA2, DNM3, SYT1, ASXL3, PPARA, PLXNA2, PTPRD, RORA, LOXL2, ELAVL4, CDH9, MAGI2, ABI1, RALA, DOCK10, PRKD1, BCL2L1, HDAC2, ETS1, TNN, RYR2, SEMA3D, TGFA, TBX20, FAT3, MTMR2, VCL, ROBO2, CDH23, AKAP13, NEDD9, RIMS2, EYA4, SEMA5A, BCL11A, FREM1, DCC, CTNNA2, CHN1, PAR3, NRG1, PRKCA, SEMA3C </p> |
| GO:0007399 | nervous system development         | 2.8981794910728524e-29 | <p> RTN1, SEMA4D, NFIA, RPS6KA5, TAOK3, SLC8A1, KCNC1, CD38, FBXO31, TRAPPC9, BCL2, THRB, DNAH11, NCAM1, KDM4B, CASP5, NDRG2, GRIP1, APBA2, ASTN2, TANC2, CSMD3, NTN4, JAK2, KALRN, USH2A, NEGR1, FGF12, ZNF536, EPB41L3, LAMA1, CDH11, GRIN2A, NRXN1, ARI D1B, IL1RAPL1, WPCP, LAMA3, ZDHHC17, CTNNA1, MYO9A, NTRK2, AK8, NCAM2, TIAM2, MYT1L, SRGAP2B, SMARCA4, CNTN1, NRG3, PTPRG, SLC24A4, FBXL17, NUMB, MTPN, SOX6, SYBU, VCAN, SHANK2, RAPGEF5, UNC5D, NREP, GABRA5, DOK5, DLG5, ASTN1, CHRM3, SLIT2, ROR1 </p>                                                                                                                                                                                                                                                                                                                                                                                                                                                                                                                                                                                                                                                                                                                                                                                                                                                                                                                                                                                                                                                                                                                                                                                                                                                                                                                                                                                                                                                                                                                                                                                                                                                                                                                                                              |



|            |                                    |                        |                                                                                                                                                                                                                                                                                                                                                                                                                                                                                                                                                                                                                                                                                                                                                                                                                                                                                                                                                                                                                                                                                                                                                                                                                                                                                                                                                                                                                                                                                                                                                                                                                  |
|------------|------------------------------------|------------------------|------------------------------------------------------------------------------------------------------------------------------------------------------------------------------------------------------------------------------------------------------------------------------------------------------------------------------------------------------------------------------------------------------------------------------------------------------------------------------------------------------------------------------------------------------------------------------------------------------------------------------------------------------------------------------------------------------------------------------------------------------------------------------------------------------------------------------------------------------------------------------------------------------------------------------------------------------------------------------------------------------------------------------------------------------------------------------------------------------------------------------------------------------------------------------------------------------------------------------------------------------------------------------------------------------------------------------------------------------------------------------------------------------------------------------------------------------------------------------------------------------------------------------------------------------------------------------------------------------------------|
|            |                                    |                        | , ADAMTSL1, AKT3, CRB1, HECW1, ERBB4, KANK1, ATRX, CHST8, MACF1, MNAT1, RAP1A, TRIO, ABL2, EML1, CCDC141, CNTN4, ITGA1, TCF12, ITGA8, RUNX1, ALDH1A2, EYA1, PLS1, ANK2, SLC1A2, ZBTB16, SLIT3, GRIN2B, ROBO1, PAK3, GABRA2, OVOL2, BRINP1, CHODL, BBS2, IL1RAPL2, GRIK1, SOX5, DSCAM, SDK1, SLC1A1, GRM5, EPHA6, NTN1, CA10, LDB2, IGF1R, NLGN1, SHROOM3, JAM2, CNTNAP2, MAP2, CAMK1D, FLRT2, PTPRO, COBL, CRTAC1, CUX1, ANK3, TBDC, GPC6, RELN, CDH4, TNF, CNTN6, APP, CCDC88A, ARNT2, SPOCK1, TACC2, PAK1, IGF2BP3, HCN1, FRY, LRFN5, TENM4, CECR2, RASGRF1, RBFOX1, MEIS2, LRRC4C, ALCAM, PPP1R9A, CLSTN2, RARB, TCF4, FRYL, TIAM1, PBX1, PHACTR1, SLC39A12, DISC1, NTM, ASAP1, EGF, FYN, EPHA7, NAV2, STK3, S100B, TOX, PCDH15, CNTN5, LRIG1, PRKACB, RIMS1, PCSK2, EPHB1, LSAMP, CTTNBP2, IGSF21, HERC1, FAM126A, EXT1, EFNA5, HDAC4, STK36, KLHL1, TRPC5, PPFIA2, ACSBG1, POU6F2, TENM3, LINGO2, OPCML, MARK2, ATF2, GRID2, ZNF423, LRP2, SEMA6D, NTF3, NTNG1, ISX, TMEM108, GABRB3, GRM7, RAPGEF2, NAV3, TMMP2L, ATXN1, PRKCQ, KIRREL3, GABRG2, PRKCH, NRXN3, DLC1, ATP8A2, UBE3A, APC, MACROD2, AUTS2, EPHB2, PDLIM5, PRTG, CTNND2, SETD2, SDCCAG8, NRP1, MDGA2, RPGRIP1, DAB1, ALK, SEMA3A, SEMA3E, MYEF2, DCLK1, CDH2, TENM2, HDAC9, FSTL4, MTOR, RORB, GABRB1, RGS7, GALC, GLI3, NTRK3, HYDIN, ZNF521, DNM3, SYT1, SYNDIG1, DPF3, NPHP4, PLXNA2, PTPRD, RORA, PLCB1, BPTF, PRKG1, ELAVL4, MAGI2, NELL1, ABI1, ASIC2, RALA, DOCK10, PRKD1, HDAC2, TNN, SEMA3D, TBX20, FAT3, MTMR2, VCL, ATAT1, ROBO2, CDH23, PCP4, RIMS2, SCN8A, SEMA5A, CABLES1, BCL11A, DCC, CTNNA2, CHN1, ETV6, PARD3, NRG1, SEMA3C |
| GO:0048666 | neuron development                 | 4.1199301133787966e-29 | SEMA4D, RPS6KA5, TAOX3, CD38, FBXO31, BCL2, THRB, NCAM1, GRIP1, TANC2, CSMD3, NTN4, JAK2, KALRN, NEGR1, EPB41L3, LAMA1, CDH11, NRXN1, IL1RAPL1, WDPCP, LAMA3, ZDHHC17, CTNNA1, MYO9A, NTRK2, NCAM2, TIAM2, MYT1L, CNTN1, PTPRG, NUMB, UNC5D, NREP, GABRA5, DLG5, SLIT2, ROR1, ADAMTSL1, CRB1, HECW1, KANK1, MACF1, RAP1A, TRIO, ABL2, CCDC141, CNTN4, ITGA1, RUNX1, PLS1, SLIT3, ROBO1, PAK3, CHODL, DSCAM, SDK1, EPHA6, NTN1, IGF1R, NLGN1, CNTNAP2, MAP2, CAMK1D, FLRT2, PTPRO, COBL, CRTAC1, CUX1, ANK3, TBDC, RELN, CDH4, TNF, CNTN6, APP, CCDC88A, SPOCK1, PAK1, HCN1, FRY, TENM4, CECR2, RASGRF1, LRRC4C, ALCAM, PPP1R9A, FRYL, TIAM1, PBX1, PHACTR1, SLC39A12, DISC1, NTM, ASAP1, FYN, EPHA7, S100B, TOX, PCDH15, CNTN5, RIMS1, EPHB1, HERC1, EXT1, EFNA5, KLHL1, TRPC5, PPFIA2, TENM3, OPCML, MARK2, GRID2, LRP2, SEMA6D, NTF3, NTNG1, TMEM108, GRM7, RAPGEF2, PRKCQ, KIRREL3, NRXN3, ATP8A2, UBE3A, AUTS2, EPHB2, PDLIM5, PRTG, CTNND2, NRP1, RPGRIP1, DAB1, ALK, SEMA3A, SEMA3E, DCLK1, CDH2, TENM2, FSTL4, RORB, GABRB1, GLI3, NTRK3, DNM3, SYT1, NPHP4, PLXNA2, PTPRD, PRKG1, ELAVL4, MAGI2, ABI1, DOCK10, PRKD1, HDAC2, TNN, SEMA3D, FAT3, MTMR2, VCL, ATAT1, ROBO2, CDH23, RIMS2, SEMA5A, BCL11A, DCC, CTNNA2, CHN1, PARD3, SEMA3C                                                                                                                                                                                                                                                                                                                                                                 |
| GO:0007275 | multicellular organism development | 1.5586519351291916e-27 | CD44, PTPRR, RTN1, SEMA4D, IGSF3, EVC, TEAD1, NFIA, RPS6KA5, TAOX3, PRKCB, A2M, SLC8A1, KCNC1, GPR55, SIAH3, CD38, FBXO31, TRAPPC9, BCL2, MMP16, COL18A1, THRB, DNAH11, RAG1, NCAM1, KDM4B, IL6R, SORBS2, CASP5, ZNF568, NDRG2, GRIP1, APBA2, ASTN2, TANC2, CSMD3, NTN4, JAK2, KALRN, USH2A, NEGR1, FGF12, FLI1, MEGF11, ZNF536, EPB41L3, LAMA1, CDH11, GRIN2A, NRXN1, ARID1B, IL1RAPL1, WDPCP, LAMA3, ADCYAP1R1, CTDP1, ADAMTS6, RPS6KA2, SMOC2, ZDHHC17, CACNA1C, EXOC4, CTNNA1, MYO9A, NTRK2, FOXN3, AK8, THSD7A, NCAM2, TIAM2, MYT1L, SRGAP2B, SMARCA4, CNTN1, ZNRF3, MEOX2, ENPEP, NRG3, PTPRG, SLC24A4, FBXL17, GAS2, NUMB, MTPN, SOX6, MECOM, SYBU, VCAN, NHS, SHANK2, RAPGEF5, UNC5D, NREP, GABRA5, DOK5, DLG5, ASTN1, CHRM3, CPE, CALD1, ARHGAP24, SPRED2, SLIT2, MYLK3, ROR1, ADAMTSL1, ZNF675, AKT3, CRB1, ALPK2, HECW1, AFF3, ERBB4, KANK1, ATRX, DMRT1, CHST8, MACF1, MNAT1, RAP1A, TRIO, CTNBNL1, RAD51B, MYO3B, CHSY1, EXT2, ABL2, EML1, CCDC141, CNTN4, SLC40A1, ETS2, ITGA1, TCF12, HIRA, ITGA8, RBM19, RUNX1, ALDH1A2, CDH17, EYA1, KIAA1217, MORC3, PLS1, ANK2, SLC1A2, ZBTB16, SLIT3, GRIN2B, ROBO1, ANKRD11, PAK3, GABRA2, MDM1, OVOL2, BRINP1, MLLT3, CHODL, GABPA, PSG9, BBS2, IL1RAPL2, MYO3A, GRIK1, SOX5, DSCAM, KDM4C, SDK1, SLC1A1, GRM5, EPHA6, NTN                                                                                                                                                                                                                                                                                                                                 |

|            |                                  |                       |                                                                                                                                                                                                                                                                                                                                                                                                                                                                                                                                                                                                                                                                                                                                                                                                                                                                                                                                                                                                                                                                                                                                                                                                                                                                                                                                                                                                                                                                                                                                                                                                                                                                                                                                                                                                                                                                                                                                                                                                                                                                                                                            |
|------------|----------------------------------|-----------------------|----------------------------------------------------------------------------------------------------------------------------------------------------------------------------------------------------------------------------------------------------------------------------------------------------------------------------------------------------------------------------------------------------------------------------------------------------------------------------------------------------------------------------------------------------------------------------------------------------------------------------------------------------------------------------------------------------------------------------------------------------------------------------------------------------------------------------------------------------------------------------------------------------------------------------------------------------------------------------------------------------------------------------------------------------------------------------------------------------------------------------------------------------------------------------------------------------------------------------------------------------------------------------------------------------------------------------------------------------------------------------------------------------------------------------------------------------------------------------------------------------------------------------------------------------------------------------------------------------------------------------------------------------------------------------------------------------------------------------------------------------------------------------------------------------------------------------------------------------------------------------------------------------------------------------------------------------------------------------------------------------------------------------------------------------------------------------------------------------------------------------|
|            |                                  |                       | <p>1, CA10, NR5A2, LDB2, IGF1R, NLGN1, SHROOM3, JAM2, ALX4, CNTNA P2, MAP2, CFTR, CAMK1D, FLRT2, PTPRO, INSR, COBL, CRTAC1, CUX1, ANK3, TBCD, GPC6, RELN, TRPS1, MYO18B, CDH4, TNFR, ADCY9, CELF4, VAV3, CNTN6, APP, CCDC88A, ARNT2, SPOCK1, PLCE1, TACC2, ADAM12, PAK1, MITF, IGF2BP3, HCN1, FRY, CXADR, LRFN5, TENM4, CECR2, GHR, RASGRF1, RIN2, RBFOX1, MEIS2, STARD13, KL, LRRC4C, ALCAM, PPP1R9A, ADAMTS16, SLAMF1, INO80D, CLSTN2, NEBL, RARB, TCF4, FRYL, TIAM1, PBX1, PHACTR1, SLC39A12, DISC1, FMN1, ZFPM2, VSTM4, SVEP1, NTM, ASAP1, EDAR, EGF, PDGFD, FYN, XRCC4, EPHA7, NAV2, STK3, COL19A1, AP2B1, S100B, TOX, PCDH15, ESR1, SGCZ, CNTN5, LRIG1, PRKACB, RIMS1, POR, WWOX, PCSK2, FUT8, EPHB1, LSAMP, CTTNBP2, FHOD3, GREB1L, EFEMP1, AJAP1, IGSF21, HERC1, DOCK1, FAM126A, FLT1, EXT1, EFNA5, NXN, HDAC4, STK36, KLHL1, TRPC5, PPFIA2, AKAP6, ACSBG1, POU6F2, TENM3, LINGO2, OPCML, MARK2, ATF2, RBBP8, GRID2, ZNF423, LRP2, SEMA6D, NTF3, FER, SNRK, CAMK4, NTNG1, ISX, SGCD, TMEM108, GABRB3, GRM7, RAPGEF2, NAV3, IMP2L, GTF2I, ATXN1, PRKCQ, KIRREL3, GABRG2, CPS1, PRKCH, NRXN3, DLC1, ATP8A2, UBE3A, APC, MACROD2, TTL5, INO80, AUTS2, EPHB2, PDLIM5, XYLT1, PRTG, NBN, ADAMTS18, CTNND2, COL22A1, SETD2, DOCK2, SDCCAG8, FLVCR1, NRP1, CDH13, MDGA2, RPGRIP1, DACH1, DAB1, ALK, SEMA3A, SEMA3E, MYEF2, DCLK1, KIF16B, NRIP1, CDH2, ARID5B, TENM2, SERPINB7, HDAC9, PIK3R3, MAP2K6, FSTL4, MTOR, RORB, GABRB1, FBLN1, FHL2, NCAPG2, RGS7, TTC39C, SPRED1, SIPA1L3, ADAM10, GALT, PAPP2, ABCB5, SPECC1, CSMD1, GLI3, NTRK3, RXFP1, FBN1, SGCG, HYDIN, TBX15, BMPER, ZNF521, HMG2, NSUN2, DNMT3, SYT1, SYNDIG1, DPF3, SCAPER, NPHP4, PPARA, PLXNA2, PTPRD, RORA, MYH15, PLCB1, LOXL2, BPTF, PRKG1, RASGRF1, ELAVL4, MAGI2, NELL1, ABI1, ASIC2, RALA, DOCK10, FNDC3A, NECAB1, PRKD1, BCL2L1, HDAC2, ETS1, TNN, RYR2, SEMA3D, TGFA, PRLR, TBX20, FAT3, MTMR2, ATF6, VCL, ATAT1, ROBO2, CDH23, AKAP13, NEDD9, ENPP1, PCP4, RIMS2, SCN8A, EYA4, L3MBTL3, SEMA5A, CABLES1, BCL11A, FREM1, DCC, CTNNA2, CHN1, ETV6, PARD3, NRG1, PRKCA, SEMA3C, TOP1</p>                                                       |
| GO:0048856 | anatomical structure development | 3.523510932749443e-27 | <p>CD44, PTPRR, RTN1, SEMA4D, IGSF3, EVC, TEAD1, NFIA, RPS6KA5, TAOX3, PRKCB, A2M, SLC8A1, ANKRD6, KCNC1, GPR55, SIAH3, CD38, FBXO31, TRAPPC9, BCL2, MMP16, COL18A1, THRB, DNAH11, RAG1, CDC42EP3, NCAM1, KDM4B, IL6R, CDH8, ATP10A, SORBS2, CASP5, ZNF568, NDRG2, GRIP1, APBA2, ASTN2, TANC2, CSMD3, RCAN1, NTN4, JAK2, BICD1, KALRN, USH2A, NEGR1, FGF12, FLI1, MEGF11, ZNF536, EPB41L3, LAMA1, PARVB, CDH11, GRIN2A, NRXN1, ARID1B, IL1RAPL1, WDPCP, LAMA3, ADCYAP1R1, CTDP1, ADAMTS6, RPS6KA2, SMOC2, ZDHHC17, KCNH1, CACNA1C, EXOC4, CTNNA1, MYO9A, NTRK2, FOXN3, AK8, THSD7A, NCAM2, TIAM2, MYT1L, SRGAP2B, SMARCA4, CNTN1, ZNRK3, PALMD, MEOX2, ENPEP, NRG3, PTPRG, SLC24A4, SYNE1, FBXL17, GAS2, NUMB, MTPN, SOX6, MECOM, SYBU, VCAN, NHS, SHANK2, RAPGEF5, PTGFRN, UNC5D, NREP, GABRA5, DOK5, DLG5, CFDP1, PGM5, ASTN1, ATRN1, CHRM3, CPE, CALD1, ARHGAP24, SPRED2, SLIT2, MYLK3, ROR1, ADAMTSL1, KAZN, ZNF675, AKT3, CRB1, ALPK2, HECW1, AFF3, LCE1F, ERBB4, KANK1, ATRX, DMRT1, CHST8, MACF1, MNAT1, TAF4B, RAP1A, TRIO, CTNNBL1, RAD51B, MYO3B, CHSY1, EXT2, ABL2, MAP3K5, NOS1, SPAG16, EML1, CCDC141, CNTN4, RNF17, SLC40A1, FGD4, ETS2, ITGA1, TCF12, HIRA, ITGA8, RBM19, RUNX1, ALDH1A2, FAM171A1, CDH17, PEAK1, EYA1, KIAA1217, MORC3, CDH18, FRMD6, PLS1, ANK2, SLC1A2, ZBTB16, SLIT3, GRIN2B, ROBO1, ANKRD11, EGFLAM, PAK3, GABRA2, MDM1, OVOL2, BRINP1, MLLT3, CPQ, CHODL, GABPA, PRICKLE2, PSG9, PACRG, BBS2, IL1RAPL2, MYOM2, MYO3A, GRIK1, NUBPL, SOX5, DSCAM, DNMBP, KDM4C, SDK1, SLC1A1, GRM5, EPHA6, NTN1, CA10, NR5A2, LDB2, IGF1R, WDR72, NLGN1, SHROOM3, JAM2, ALX4, MSI2, CNTNAP2, MAP2, CFTR, CAMK1D, FLRT2, PTPRO, INSR, COBL, CATSPER2, CRTAC1, CUX1, ANK3, CDH12, TBCD, GPC6, RELN, TRPS1, ADAMTS5, MYO18B, CDH4, TNFR, ADCY9, OCA2, CELF4, VAV3, CNTN6, APP, CCDC88A, ARNT2, SPOCK1, PLCE1, TACC2, ADAM12, PAK1, MITF, IGF2BP3, ADCK1, HCN1, FRY, CXADR, EPS8, LRFN5, UTRN, TENM4, CECR2, GHR, RIPK4, RASGRF1, RIN2, RBFOX1, MEIS2, STARD13, KL, LRRC4C, ALCAM, PPP1R9A, ADAMTS16, SLAMF1, INO80D, CLSTN2, NEBL, RARB, TCF4, FRYL, TIAM1, PBX1, PHACTR1, SLC39A12, DISC1, FMN1, ZFP</p> |

|            |                            |                        |                                                                                                                                                                                                                                                                                                                                                                                                                                                                                                                                                                                                                                                                                                                                                                                                                                                                                                                                                                                                                                                                                                                                                                                                                                                                                                                                                                                                                                                                                                                                                                                                  |
|------------|----------------------------|------------------------|--------------------------------------------------------------------------------------------------------------------------------------------------------------------------------------------------------------------------------------------------------------------------------------------------------------------------------------------------------------------------------------------------------------------------------------------------------------------------------------------------------------------------------------------------------------------------------------------------------------------------------------------------------------------------------------------------------------------------------------------------------------------------------------------------------------------------------------------------------------------------------------------------------------------------------------------------------------------------------------------------------------------------------------------------------------------------------------------------------------------------------------------------------------------------------------------------------------------------------------------------------------------------------------------------------------------------------------------------------------------------------------------------------------------------------------------------------------------------------------------------------------------------------------------------------------------------------------------------|
|            |                            |                        | M2,VSTM4,SVEP1,NTM,ASAP1,EDAR,EGF,PDGFD,FYN,XRCC4,EPH<br>A7,NAV2,STK3,COL19A1,AP2B1,S100B,TOX,PCDH15,ESR1,ARHG<br>AP12,SGCZ,PDE4D,CNTN5,LRIG1,PRKACB,PDE3A,RIMS1,POR,CE<br>RS3,WWOX,PCSK2,FUT8,EPHB1,LSAMP,CTTNBP2,FHOD3,GREB1L,<br>EFEMP1,ARMC2,AJAP1,IGSF21,HERC1,DOCK1,FAM126A,FLT1,EX<br>T1,EFNA5,NXN,C14ORF39,HDAC4,STK36,KLHL1,TRPC5,FTO,PPF<br>IA2,AKAP6,ACSBG1,POU6F2,TENM3,LINGO2,OPCML,MARK2,ATF2<br>,RBBP8,GRID2,ZNF423,LRP2,SEMA6D,NTF3,FER,SNRK,CAMK4,N<br>TNG1,DDX10,ISX,SGCD,TMEM108,GABRB3,GRM7,RAPGEF2,NAV3,<br>IMMP2L,GTf2I,ATXN1,PRKCQ,KIRREL3,GABRG2,CPS1,PRKCH,NR<br>XN3,KRT25,DLC1,ATP8A2,SLC24A3,UBE3A,APC,MACROD2,TTL5<br>,INO80,AUTS2,EPHB2,PDLIM5,XYL1,PRTG,NBN,ADAMTS18,CTN<br>ND2,COL22A1,SETD2,PACSIN2,DOCK2,SDCCAG8,FLVCR1,NRP1,C<br>DH13,MDGA2,RPGRIP1,DACH1,DAB1,ALK,LDLRAD4,SEMA3A,SEMA<br>3E,MYEF2,DCLK1,KIF16B,NRIP1,CDH2,ARID5B,TENM2,TANC1,S<br>ERPINB7,SYCP1,HDAC9,PIK3R3,MAP2K6,FSTL4,MTOR,RORB,GAB<br>RB1,FBLN1,SH3KBP1,FHL2,NCAPG2,RGS7,TTC39C,SPRED1,SIPA<br>1L3,ADAM10,GALC,FLNB,PAPPA2,ABCB5,SPECC1,DY19L2,CSMD<br>1,GLI3,NTRK3,RXFP1,FBN1,SGCG,HYDIN,TBX15,BMPER,ZNF521<br>,HMGA2,NSUN2,DNM3,SYT1,SYNDIG1,ASXL3,DPF3,SCAPER,NPHP<br>4,PPARA,PLXNA2,PTPRD,RORA,MYH15,PLCB1,LOXL2,BPTF,PRKG<br>1,RASGRP1,ELAVL4,CDH9,DMBT1,MAGI2,NELL1,ABI1,ASIC2,RA<br>LA,DOCK10,FNDC3A,NECAB1,PRKD1,BCL2L1,HDAC2,ETS1,TNN,R<br>YR2,SEMA3D,TGFA,PRLR,TBX20,FAT3,MTMR2,ATF6,EYS,VCL,AT<br>AT1,ROBO2,IFT81,CDH23,AKAP13,NEDD9,ENPP1,PCP4,RIMS2,S<br>CN8A,EYA4,L3MBTL3,HIVEP3,SEMA5A,CABLES1,BCL11A,FREM1,<br>DCC,CTNNA2,CHN1,ETV6,PAR3,NRG1,PRKCA,FMN2,SEMA3C,TO<br>P1 |
| GO:0034330 | cell junction organization | 6.792358375283443e-27  | APBB2,SEMA4D,NFIA,BCL2,UNC13B,CDH8,TANC2,KALRN,NEGR1,<br>CACNG2,EPB41L3,CDH11,NRXN1,IL1RAPL1,WDPCP,CTNNA1,MYO9<br>A,NTRK2,OCLN,CACNB2,NUMB,SYBU,SHANK2,DLG5,ERBB4,GPHN,<br>MACF1,RAP1A,DUSP22,CORO2B,PEAK1,CDH18,ANK2,GRIN2B,PAK<br>3,DGKB,GABRA2,IL1RAPL2,DSCAM,SDK1,SLC1A1,GRM5,NTN1,IG<br>F1R,NLGN1,CNTNAP2,FLRT2,NOS1AP,PTPRO,INSR,ANK3,CDH12,<br>TBCD,GPC6,RELN,TNR,APP,CXADR,LRFN5,LRR4C,PDZRN3,CLST<br>N2,DISC1,FMN1,SVEP1,FRMPD4,FYN,EPHA7,CNTN5,ERC2,CNKS<br>R2,EPHB1,CTTNBP2,IGSF21,EXT1,EFNA5,TLN2,PPFIA2,LINGO2,<br>GRID2,FER,NTNG1,MAPRE2,TMEM108,GABRB3,RAPGEF2,KIRREL3<br>,GABRG2,PRKCH,NRXN3,DLC1,UBE3A,APC,EPHB2,ERC1,PDLIM5,<br>CTNND2,PKP1,NRP1,SEMA3E,CDH2,TANC1,ADAM10,LRFN2,NTRK3<br>,ABHD17C,PTPRK,DNM3,SYNDIG1,NPHP4,PTPRD,SHISA6,CDH9,A<br>SIC2,DOCK10,PTPRA,MTMR2,VCL,ROBO2,NEDD9,UNC13C,CTNNA2<br>,PAR3,NRG1,CAST,PRKCA                                                                                                                                                                                                                                                                                                                                                                                                                                                                                                                                                                                                                                                                                                                                               |
| GO:0048731 | system development         | 1.0066545972324792e-26 | CD44,RTN1,SEMA4D,IGSF3,EVC,NFIA,RPS6KA5,TAOK3,PRKCB,A<br>2M,SLC8A1,KCNC1,GPR55,CD38,FBXO31,TRAPPC9,BCL2,MMP16,<br>COL18A1,THRB,DNAH11,RAG1,NCAM1,KDM4B,IL6R,SORBS2,CASP<br>5,NDRG2,GRIPI1,APBA2,ASTN2,TANC2,CSMD3,NTN4,JAK2,KALRN<br>,USH2A,NEGR1,FGF12,FLI1,MEGF11,ZNF536,EPB41L3,LAMA1,C<br>DH11,GRIN2A,NRXN1,ARID1B,IL1RAPL1,WDPCP,LAMA3,CTDP1,A<br>DAMTS6,RPS6KA2,SMOC2,ZDHHC17,CACNA1C,CTNNA1,MYO9A,NTR<br>K2,FOXN3,AK8,THSD7A,NCAM2,TIAM2,MYT1L,SRGAP2B,SMARCA4<br>,CNTN1,MEOX2,ENPEP,NRG3,PTPRG,SLC24A4,FBXL17,GAS2,NUM<br>B,MTPN,SOX6,MECOM,SYBU,VCAN,NHS,SHANK2,RAPGEF5,UNC5D,<br>NREP,GABRA5,DOK5,DLG5,ASTN1,CHRM3,CPE,CALD1,ARHGAP24,<br>SPRED2,SLIT2,MYLK3,ROR1,ADAMTSL1,ZNF675,AKT3,CRB1,ALP<br>K2,HECW1,ERBB4,KANK1,ATR,DMRT1,CHST8,MACF1,MNAT1,RAP<br>1A,TRIO,CTNNB1,CHSY1,EXT2,ABL2,EML1,CCDC141,CNTN4,SL<br>C40A1,ETS2,ITGA1,TCF12,ITGA8,RUNX1,ALDH1A2,CDH17,EYA1<br>,KIAA1217,PLS1,ANK2,SLC1A2,ZBTB16,SLIT3,GRIN2B,ROBO1,<br>ANKRD11,PAK3,GABRA2,MDM1,OVOL2,BRINP1,MLLT3,CHODL,GAB<br>PA,PSG9,BBS2,IL1RAPL2,GRIK1,SOX5,DSCAM,SDK1,SLC1A1,GR<br>M5,EPHA6,NTN1,CA10,LDB2,IGF1R,NLGN1,SHROOM3,JAM2,ALX4<br>,CNTNAP2,MAP2,CAMK1D,FLRT2,PTPRO,INSR,COBL,CRTAC1,CUX<br>1,ANK3,TBCD,GPC6,RELN,TRPS1,MYO18B,CDH4,TNR,CELF4,VAV<br>3,CNTN6,APP,CCDC88A,ARNT2,SPOCK1,PLCE1,TACC2,ADAM12,P<br>AK1,MITF,IGF2BP3,HCN1,FRY,CXADR,LRFN5,TENM4,CECR2,GHR                                                                                                                                                                                                                                       |

|            |                        |                        |                                                                                                                                                                                                                                                                                                                                                                                                                                                                                                                                                                                                                                                                                                                                                                                                                                                                                                                                                                                                                                                                                                                                                                                                                                                                                                                                                                                                                                                                                                                                                                                                                   |
|------------|------------------------|------------------------|-------------------------------------------------------------------------------------------------------------------------------------------------------------------------------------------------------------------------------------------------------------------------------------------------------------------------------------------------------------------------------------------------------------------------------------------------------------------------------------------------------------------------------------------------------------------------------------------------------------------------------------------------------------------------------------------------------------------------------------------------------------------------------------------------------------------------------------------------------------------------------------------------------------------------------------------------------------------------------------------------------------------------------------------------------------------------------------------------------------------------------------------------------------------------------------------------------------------------------------------------------------------------------------------------------------------------------------------------------------------------------------------------------------------------------------------------------------------------------------------------------------------------------------------------------------------------------------------------------------------|
|            |                        |                        | , RASGRF1, RIN2, RBFOX1, MEIS2, STARD13, LRRC4C, ALCAM, PPP1R9A, ADAMTS16, SLAMF1, CLSTN2, NEBL, RARB, TCF4, FRYL, TIAM1, PBX1, PHACTR1, SLC39A12, DISC1, FMN1, ZFPM2, VSTM4, SVEP1, NTM, ASAP1, EDAR, EGF, PDGFD, FYN, XRCC4, EPHA7, NAV2, STK3, COL19A1, AP2B1, S100B, TOX, PCDH15, ESR1, SGCZ, CNTN5, LRIG1, PRKACB, RIMS1, POR, WWOX, PCSK2, EPHB1, LSAMP, CTTNBP2, FHOD3, GREB1L, EFEMP1, IGSF21, HERC1, DOCK1, FAM126A, FLT1, EXT1, EFNA5, NXN, HDAC4, STK36, KLHL1, TRPC5, PPFIA2, AKAP6, ACSBG1, POU6F2, TENM3, LINGO2, OPCML, MARK2, ATF2, GRID2, ZNF423, LRP2, SEMA6D, NTF3, FER, SNRK, CAMK4, NTNG1, ISX, SGCD, TMEM108, GABRB3, GRM7, RAPGEF2, NAV3, IMMP2L, GTF2I, ATXN1, PRKCQ, KIRREL3, GABRG2, CPS1, PRKCH, NRXN3, DLC1, ATP8A2, UBE3A, APC, MACROD2, TTLL5, AUTS2, EPHB2, PDLIM5, XYLT1, PRTG, NBN, ADAMTS18, CTNND2, COL22A1, SETD2, DOCK2, SDCCAG8, FLVCR1, NRP1, CDH13, MDGA2, RPGRIP1, DAB1, ALK, SEMA3A, SEMA3E, MYEF2, DCLK1, NRIP1, CDH2, ARID5B, TENM2, SERPINB7, HDAC9, PIK3R3, MAP2K6, FSTL4, MTOR, RORB, GABRB1, FHL2, NCAPG2, RGS7, SPRED1, SIPA1L3, ADAM10, GALT, PAPP2, ABCB5, CSMD1, GLI3, NTRK3, RXFP1, FBN1, SCMG, HYDIN, TBX15, BMPER, ZNF521, HMGA2, DNM3, SYT1, SYNDIG1, DPF3, SCAPER, NPHP4, PPARA, PLXNA2, PTPRD, RORA, MYH15, PLCB1, LOXL2, BPTF, PRKG1, RASGRP1, ELAVL4, MAGI2, NELL1, ABI1, ASIC2, RALA, DOCK10, FNDC3A, PRKD1, BCL2L1, HDAC2, ETS1, TNN, RYR2, SEMA3D, TGFA, PRLR, TBX20, FAT3, MTMR2, ATF6, VCL, ATAT1, ROBO2, CDH23, AKAP13, NEDD9, PCP4, RIMS2, SCN8A, L3MBTL3, SEMA5A, CABLES1, BCL11A, FREM1, DCC, CTNNA2, CHN1, ETV6, PARD3, NRG1, PRKCA, SEMA3C |
| GO:0030182 | neuron differentiation | 1.0477175510684315e-26 | RTN1, SEMA4D, RPS6KA5, TAOK3, CD38, FBXO31, TRAPPC9, BCL2, THRB, NCAM1, GRIP1, TANC2, CSMD3, NTN4, JAK2, KALRN, USH2A, NEGR1, ZNF536, EPB41L3, LAMA1, CDH11, NRXN1, IL1RAPL1, WPCP, LAMA3, ZDHHC17, CTNNA1, MYO9A, NTRK2, NCAM2, TIAM2, MYT1L, CNTN1, PTPRG, NUMB, MTPN, UNC5D, NREP, GABRA5, DOK5, DLG5, SLIT2, ROR1, ADAMTS1, CRB1, HECW1, ERBB4, KANK1, MACF1, RAP1A, TRIO, ABL2, CCDC141, CNTN4, ITGA1, TCF12, RUNX1, ALDH1A2, EYA1, PLS1, SLIT3, ROBO1, PAK3, BRINP1, CHODL, DSCAM, SDK1, EPHA6, NTN1, IGF1R, NLGN1, CNTNAP2, MAP2, CAMK1D, FLRT2, PTPRO, COBL, CRTAC1, CUX1, ANK3, TBCD, RELN, CDH4, TNFR, CNTN6, APP, CCDC88A, SPOCK1, PAK1, HCN1, FRY, TENM4, CECR2, RASGRF1, LRRC4C, ALCAM, PPP1R9A, TCF4, FRYL, TIAM1, PBX1, PHACTR1, SLC39A12, DISC1, NTM, ASAP1, FYN, EPHA7, S100B, TOX, PCDH15, CNTN5, RIMS1, EPHB1, HERC1, EXT1, EFNA5, KLHL1, TRPC5, PPFIA2, TENM3, OPCML, MARK2, GRID2, LRP2, SEMA6D, NTF3, NTNG1, TMEM108, GRM7, RAPGEF2, PRKCQ, KIRREL3, NRXN3, ATP8A2, UBE3A, AUTS2, EPHB2, PDLIM5, PRTG, CTNND2, NRP1, MDGA2, RPGRIP1, DAB1, ALK, SEMA3A, SEMA3E, MYEF2, DCLK1, CDH2, TENM2, HDAC9, FSTL4, RORB, GABRB1, GLI3, NTRK3, ZNF521, DNM3, SYT1, NPHP4, PLXNA2, PTPRD, RORA, PRKG1, ELAVL4, MAGI2, ABI1, DOCK10, PRKD1, HDAC2, TNN, SEMA3D, TBX20, FAT3, MTMR2, VCL, ATAT1, ROBO2, CDH23, PCP4, RIMS2, SEMA5A, BCL11A, DCC, CTNNA2, CHN1, PARD3, NRG1, SEMA3C                                                                                                                                                                                                                        |
| GO:0048699 | generation of neurons  | 1.5675297942235246e-26 | RTN1, SEMA4D, RPS6KA5, TAOK3, CD38, FBXO31, TRAPPC9, BCL2, THRB, NCAM1, GRIP1, ASTN2, TANC2, CSMD3, NTN4, JAK2, KALRN, USH2A, NEGR1, ZNF536, EPB41L3, LAMA1, CDH11, NRXN1, IL1RAPL1, WPCP, LAMA3, ZDHHC17, CTNNA1, MYO9A, NTRK2, NCAM2, TIAM2, MYT1L, CNTN1, NRG3, PTPRG, NUMB, MTPN, UNC5D, NREP, GABRA5, DOK5, DLG5, ASTN1, SLIT2, ROR1, ADAMTS1, CRB1, HECW1, ERBB4, KANK1, MACF1, RAP1A, TRIO, ABL2, EML1, CCDC141, CNTN4, ITGA1, TCF12, RUNX1, ALDH1A2, EYA1, PLS1, SLIT3, ROBO1, PAK3, BRINP1, CHODL, SOX5, DSCAM, SDK1, EPHA6, NTN1, IGF1R, NLGN1, CNTNAP2, MAP2, CAMK1D, FLRT2, PTPRO, COBL, CRTAC1, CUX1, ANK3, TBCD, RELN, CDH4, TNFR, CNTN6, APP, CCDC88A, SPOCK1, PAK1, HCN1, FRY, TENM4, CECR2, RASGRF1, LRRC4C, ALCAM, PPP1R9A, TCF4, FRYL, TIAM1, PBX1, PHACTR1, SLC39A12, DISC1, NTM, ASAP1, FYN, EPHA7, S100B, TOX, PCDH15, CNTN5, RIMS1, EPHB1, HERC1, EXT1, EFNA5, KLHL1, TRPC5, PPFIA2, TENM3, OPCML, MARK2, GRID2, LRP2, SEMA6D, NTF3, NTN1, TMEM108, GRM7, RAPGEF2, PRKCQ, KIRREL3, NRXN3, ATP8A2, UBE3A, AUTS2, EPHB2, PDLIM5, PRTG, CTNND2, SDCCAG8, NRP1, MDGA2, RPGRIP1, DAB1, ALK, SEMA3A, SEMA3E, MYEF2, DCLK1, CDH2, TENM                                                                                                                                                                                                                                                                                                                                                                                                                                                            |

|            |                               |                        |                                                                                                                                                                                                                                                                                                                                                                                                                                                                                                                                                                                                                                                                                                                                                                                                                                                                                                                                                                                                                                                                                                                                                                                                                                                                                                                                                                                                                                                                                                                                                                                                                                                                                                                                                                                                                                                           |
|------------|-------------------------------|------------------------|-----------------------------------------------------------------------------------------------------------------------------------------------------------------------------------------------------------------------------------------------------------------------------------------------------------------------------------------------------------------------------------------------------------------------------------------------------------------------------------------------------------------------------------------------------------------------------------------------------------------------------------------------------------------------------------------------------------------------------------------------------------------------------------------------------------------------------------------------------------------------------------------------------------------------------------------------------------------------------------------------------------------------------------------------------------------------------------------------------------------------------------------------------------------------------------------------------------------------------------------------------------------------------------------------------------------------------------------------------------------------------------------------------------------------------------------------------------------------------------------------------------------------------------------------------------------------------------------------------------------------------------------------------------------------------------------------------------------------------------------------------------------------------------------------------------------------------------------------------------|
|            |                               |                        | 2, HDAC9, FSTL4, RORB, GABRB1, GLI3, NTRK3, ZNF521, DNM3, SYT1, NPHP4, PLXNA2, PTPRD, RORA, PRKG1, ELAVL4, MAGI2, ABI1, DOCK10, PRKD1, HDAC2, TNN, SEMA3D, TBX20, FAT3, MTMR2, VCL, ATAT1, ROBO2, CDH23, PCP4, RIMS2, SEMA5A, BCL11A, DCC, CTNNA2, CHN1, PARD3, NRG1, SEMA3C                                                                                                                                                                                                                                                                                                                                                                                                                                                                                                                                                                                                                                                                                                                                                                                                                                                                                                                                                                                                                                                                                                                                                                                                                                                                                                                                                                                                                                                                                                                                                                              |
| GO:0031175 | neuron projection development | 2.4029273483665926e-26 | SEMA4D, RPS6KA5, TAOK3, CD38, FBXO31, BCL2, NCAM1, GRIP1, TANC2, CSMD3, JAK2, KALRN, NEGR1, EPB41L3, LAMA1, CDH11, NRXN1, IL1RAPL1, LAMA3, ZDHHC17, CTNNA1, MYO9A, NTRK2, NCAM2, TIAM2, CNTN1, PTPRG, NUMB, UNC5D, NREP, DLG5, SLIT2, ROR1, ADAMTSL1, HECW1, KANK1, MACF1, RAP1A, TRIO, ABL2, CCDC141, CNTN4, ITGA1, PLS1, SLIT3, ROBO1, PAK3, CHODL, DSCAM, SDK1, EPHA6, NTN1, IGF1R, NLGN1, CNTNAP2, MAP2, CAMK1D, FLRT2, PTPRO, COBL, CRTAC1, CUX1, ANK3, RELN, CDH4, TNR, CNTN6, APP, CCDC88A, SPOCK1, PAK1, FRY, CECR2, RASGRF1, LRRC4C, ALCAM, PPP1R9A, FRYL, TIAM1, PHACTR1, SLC39A12, DISC1, ASAP1, FYN, EPHA7, S100B, TOX, PCDH15, CNTN5, RIMS1, EPHB1, HERC1, EXT1, EFNA5, KLHL1, TRPC5, PPPIA2, TENM3, MARK2, GRID2, LRP2, SEMA6D, NTF3, NTNG1, TMEM108, GRM7, RAPGEF2, PRKCQ, KIRREL3, NRXN3, ATP8A2, UBE3A, AUTS2, EPHB2, PDLIM5, PRTG, CTNND2, NRP1, DAB1, ALK, SEMA3A, SEMA3E, DCLK1, CDH2, FSTL4, GLI3, NTRK3, DNM3, SYT1, PLXNA2, PTPRD, PRKG1, ELAVL4, MAGI2, ABI1, DOCK10, PRKD1, HDAC2, TNN, SEMA3D, FAT3, VCL, ROBO2, CDH23, RIMS2, SEMA5A, BCL11A, DCC, CTNNA2, CHN1, PARD3, SEMA3C                                                                                                                                                                                                                                                                                                                                                                                                                                                                                                                                                                                                                                                                                                                                                 |
| GO:0048468 | cell development              | 4.122501271812563e-26  | SEMA4D, RPS6KA5, TAOK3, SLC8A1, CD38, FBXO31, BCL2, COL18A1, THRB, NCAM1, SORBS2, GRIP1, TANC2, CSMD3, RCAN1, NTN4, JAK2, KALRN, USH2A, NEGR1, FLI1, EPB41L3, LAMA1, PARVB, CDH11, NRXN1, IL1RAPL1, WDPCP, LAMA3, CTDP1, RPS6KA2, ZDHHC17, CTNNA1, MYO9A, NTRK2, NCAM2, TIAM2, MYT1L, CNTN1, PTPRG, NUMB, UNC5D, NREP, GABRA5, DLG5, PGM5, ATRNL1, SLIT2, MYLK3, ROR1, ADAMTSL1, CRB1, ALPK2, HECW1, ERBB4, KANK1, ATRX, DMRT1, MACF1, TAF4B, RAP1A, TRIO, CHSY1, ABL2, SPAG16, CCDC141, CNTN4, RNF17, ITGA1, ITGA8, RUNX1, ALDH1A2, PEAK1, FRMD6, PLS1, ANK2, ZBTB16, SLIT3, ROBO1, PAK3, OVOL2, BRINP1, CHODL, PACRG, BBS2, MYOM2, DSCAM, SDK1, GRM5, EPHA6, NTN1, IGF1R, NLGN1, SHROOM3, JAM2, MSI2, CNTNAP2, MAP2, CFTR, CAMK1D, FLRT2, PTPRO, COBL, CATSPER2, CRTAC1, CUX1, ANK3, TBCD, RELN, MYO18B, CDH4, TNR, OCA2, CELF4, CNTN6, APP, CCDC88A, SPOCK1, PAK1, HCN1, FRY, CXADR, TENM4, CECR2, RASGRF1, LRRC4C, ALCAM, PPP1R9A, NEBL, RARB, FRYL, TIAM1, PBX1, PHACTR1, SLC39A12, DISC1, NTM, ASAP1, FYN, EPHA7, S100B, TOX, PCDH15, ESR1, SGCZ, PDE4D, CNTN5, PDE3A, RIMS1, EPHB1, FHOD3, ARMC2, HERC1, DOCK1, EXT1, EFNA5, C14ORF39, HDAC4, KLHL1, TRPC5, PPPIA2, AKAP6, TENM3, OPCML, MARK2, GRID2, LRP2, SEMA6D, NTF3, FER, NTNG1, SGCD, TMEM108, GRM7, RAPGEF2, PRKCQ, KIRREL3, PRKCH, NRXN3, ATP8A2, UBE3A, AUTS2, EPHB2, PDLIM5, PRTG, CTNND2, COL22A1, SETD2, FLVCR1, NRP1, RPGRIP1, DAB1, ALK, SEMA3A, SEMA3E, DCLK1, CDH2, ARID5B, TENM2, SYCP1, HDAC9, FSTL4, MTOR, RORB, GABRB1, FBLN1, FHL2, SIPA1L3, FLNB, DPY19L2, GLI3, NTRK3, FBN1, HYDIN, NSUN2, DNM3, SYT1, NPHP4, PPARA, PLXNA2, PTPRD, PLCB1, PRKG1, ELAVL4, MAGI2, ABI1, DOCK10, FNDC3A, PRKD1, BCL2L1, HDAC2, TNN, SEMA3D, TBX20, FAT3, MTMR2, VCL, ATAT1, ROBO2, IFT81, CDH23, AKAP13, NEDD9, RIMS2, L3MBTL3, SEMA5A, BCL11A, DCC, CTNNA2, CHN1, PARD3, NRG1, FMN2, SEMA3C |
| GO:000902  | cell morphogenesis            | 1.894545623454407e-25  | CD44, SEMA4D, RPS6KA5, TAOK3, FBXO31, BCL2, COL18A1, CDC42EP3, NCAM1, CDH8, ATP10A, GRIP1, TANC2, NTN4, KALRN, USH2A, EPB41L3, LAMA1, PARVB, CDH11, NRXN1, IL1RAPL1, WDPCP, LAMA3, ZDHHC17, MYO9A, NTRK2, TIAM2, CNTN1, PALMD, GAS2, NUMB, UNC5D, CFDP1, ATRNL1, SLIT2, ADAMTSL1, CRB1, HECW1, KANK1, DMRT1, MACF1, TRIO, CCDC141, CNTN4, FGD4, ITGA1, ITGA8, FAM171A1, PEAK1, CDH18, FRMD6, PLS1, SLIT3, ROBO1, PAK3, CHODL, DSCAM, DNMBP, EPHA6, NTN1, IGF1R, NLGN1, SHROOM3, CNTNAP2, MAP2, FLRT2, PTPRO, COBL, CUX1, ANK3, CDH12, TBCD, RELN, CDH4, TNR, CNTN6, APP, PAK1, FRY, EPS8, LRRC4C, ALCAM, FRYL, TIAM1, PHACTR1, DISC1, FYN, EPHA7, S100B, PCDH15, CNTN5, RIMS1, EPHB1, DOCK1, EXT1, EFNA5, TRPC5, PPPIA2, MARK2, LRP2, SEMA6D, NTF3, FER, NTNG1, TMEM108, RAPGEF2, PRKCQ, KIRREL3, NRXN3, DLG1, ATP8A2, UBE3A, AUTS2, EPHB2, PDLIM5, PRTG, CTNND2, COL22A1, PACSIN2, NRP1, DAB1,                                                                                                                                                                                                                                                                                                                                                                                                                                                                                                                                                                                                                                                                                                                                                                                                                                                                                                                                                           |

|            |                         |                       |                                                                                                                                                                                                                                                                                                                                                                                                                                                                                                                                                                                                                                                                                                                                                                                                                                                                                                                                                                                                                                                                                                                                                                                                                                                                                                                                                                                                                                                                                                                                                                                                                                                                                                                                                                                                                                                                                                                                                                                                                                                                                                                                                                                                                                                                                                                                                                                                                                                                                                                                                                                                                                                                                                                                                                                                                                                                                                                                                                                                                                                                                                                                                                                                                                                                                                                                                                                                                         |
|------------|-------------------------|-----------------------|-------------------------------------------------------------------------------------------------------------------------------------------------------------------------------------------------------------------------------------------------------------------------------------------------------------------------------------------------------------------------------------------------------------------------------------------------------------------------------------------------------------------------------------------------------------------------------------------------------------------------------------------------------------------------------------------------------------------------------------------------------------------------------------------------------------------------------------------------------------------------------------------------------------------------------------------------------------------------------------------------------------------------------------------------------------------------------------------------------------------------------------------------------------------------------------------------------------------------------------------------------------------------------------------------------------------------------------------------------------------------------------------------------------------------------------------------------------------------------------------------------------------------------------------------------------------------------------------------------------------------------------------------------------------------------------------------------------------------------------------------------------------------------------------------------------------------------------------------------------------------------------------------------------------------------------------------------------------------------------------------------------------------------------------------------------------------------------------------------------------------------------------------------------------------------------------------------------------------------------------------------------------------------------------------------------------------------------------------------------------------------------------------------------------------------------------------------------------------------------------------------------------------------------------------------------------------------------------------------------------------------------------------------------------------------------------------------------------------------------------------------------------------------------------------------------------------------------------------------------------------------------------------------------------------------------------------------------------------------------------------------------------------------------------------------------------------------------------------------------------------------------------------------------------------------------------------------------------------------------------------------------------------------------------------------------------------------------------------------------------------------------------------------------------------|
|            |                         |                       | SEMA3A,SEMA3E,DCLK1,CDH2,FSTL4,FBLN1,SH3KBP1,SIPAL13,FLNB,GLI3,DNM3,SYT1,PLXNA2,PTPRD,ELAVL4,CDH9,ABI1,DOCK10,TNN,SEMA3D,FAT3,VCL,ROBO2,CDH23,NEDD9,RIMS2,SEMA5A,BCL11A,DCC,CTNNA2,CHN1,PARD3,NRG1,SEMA3C                                                                                                                                                                                                                                                                                                                                                                                                                                                                                                                                                                                                                                                                                                                                                                                                                                                                                                                                                                                                                                                                                                                                                                                                                                                                                                                                                                                                                                                                                                                                                                                                                                                                                                                                                                                                                                                                                                                                                                                                                                                                                                                                                                                                                                                                                                                                                                                                                                                                                                                                                                                                                                                                                                                                                                                                                                                                                                                                                                                                                                                                                                                                                                                                               |
| GO:0032502 | developmental processes | 1.983572016498455e-24 | CD44,ZHX3,PTPRR,RTN1,ERG,SEMA4D,IGSF3,EVC,TEAD1,NFIA,RPS6KA5,TAOK3,PRKCB,A2M,SLC8A1,ANKRD6,KCNC1,GPR55,SIAH3,CD38,FBXO31,PIWIL3,TRAPPC9,BCL2,MMP16,COL18A1,THRB,DNAH11,RAG1,CDC42EP3,UNC13B,NCAM1,KDM4B,IL6R,CDH8,ATP10A,SORBS2,CASP5,ZNF568,NDRG2,GRIP1,APBA2,ASTN2,TANC2,CSMD3,RCAN1,NTN4,JAK2,BICD1,KALRN,USH2A,NEGR1,FGF12,FLI1,MEGF11,ZNF536,EPB41L3,LAMA1,PARVB,CDH11,ZBTB7C,GRIN2A,NRXN1,ARID1B,IL1RAPL1,WDCP,LAMA3,ADCYAP1R1,CTDP1,ADAMTS6,RPS6KA2,SMOC2,ZDHHC17,KCNH1,CACNA1C,EXOC4,PNPLA3,BBS9,CTNNA1,MYO9A,NTRK2,FOXP3,AK8,THSD7A,NCAM2,TIAM2,MYT1L,SRGAP2B,SMARCA4,CNTN1,ZNRF3,PALMD,MEOX2,ENPEP,PLEKHB2,NRG3,PTPRG,SLC24A4,SYNE1,FBXL17,GAS2,NUMB,MED15,MTPN,SOX6,MECOM,SYBU,VCAN,NHS,SHANK2,RAPGEF5,PTGFRN,UNC5D,NREP,GABRA5,DOK5,DLG5,CFDP1,PGM5,ASTN1,ATRN1,CHRM3,CPE,CALD1,ARHGAP24,SPRED2,SLIT2,MYLK3,ABCA5,ROR1,ADAMTSL1,KAZN,ZNF675,AKT3,CRB1,ALPK2,HECW1,AFF3,LCE1F,ERBB4,KANK1,ATRX,DMRT1,CHST8,MACF1,MNAT1,TAFA4B,RAP1A,TRIO,CTNBNB1,RAD51B,MYO3B,CHSY1,EXT2,ABL2,MAP3K5,NOS1,ABCG1,SPAG16,EML1,HTR2C,CCDC141,CNTN4,RNF17,SLC40A1,SLC9C1,SND1,FGD4,ETS2,ITGA1,TCF12,HIRA,ITGA8,RBM19,RUNX1,ALDH1A2,MAPK9,FAM171A1,CDH17,PEAK1,EYA1,KIAA1217,MORC3,CDH18,HSF2BP,FRMD6,PLS1,ANK2,SLC1A2,ZBTB16,SLIT3,GRIN2B,PHC2,ROBO1,ANKRD11,EGFLAM,PAK3,GABRA2,MDM1,OVOL2,BRINP1,MLLT3,CPQ,CHODL,GABPA,PRICKLE2,GLIS1,PSG9,PACRG,BBS2,IL1RAPL2,MYOM2,MYO3A,GRIK1,NUBPL,SOX5,DSCAM,DNMBP,KDM4C,SDK1,SLC1A1,GRM5,EPHA6,NTN1,CA10,NR5A2,LDB2,IGF1R,WDR72,NLGN1,SHROOM3,JAM2,ALX4,MSI2,CNTNAP2,MAP2,CFTR,CAMK1D,FLRT2,PTPRO,NHSL1,INSR,COBL,CATSPER2,CRTAC1,CUX1,ANK3,CDH12,TBCD,GPC6,RELN,TRPS1,ADAMTS5,MYO18B,CDH4,TNR,ADCY9,OCA2,CELF4,VAV3,CNTN6,APP,PUM1,CCDC88A,ARNT2,SPOCK1,PLCE1,TACC2,ADAM12,PAK1,MITF,IGF2BP3,ADCK1,HCN1,FRY,CXADR,EPS8,LRFN5,UTRN,TENM4,CECR2,GHR,RIPK4,RASGRF1,RIN2,PRDM16,RBFOX1,MEIS2,STARD13,KL,LRRRC4C,ALCAM,PPP1R9A,ADAMTS16,SLAMF1,INO80D,CLSTN2,NEBL,RARB,TCF4,FRYL,TIAM1,PBX1,PHACTR1,SLC39A12,DISC1,FMN1,ZFPM2,VSTM4,SVEP1,NTM,ASAP1,EDAR,EGF,PDGFR,FYN,XRCC4,EPHA7,NAV2,STK3,COL19A1,MSR1,AP2B1,S100B,TOX,PCDH15,ESR1,ARHGAP12,SGCZ,PDE4D,CNTN5,LRIG1,PRKACB,PDE3A,RIMS1,POR,CERS3,WWOX,PCSK2,FUT8,EPHB1,CREM,LSAMP,CTTNBP2,FHOD3,GREB1L,EFEMP1,ARMC2,AJAP1,IGSF21,HERC1,DOCK1,FAM126A,FLT1,EXT1,EFNA5,NXN,C14ORF39,HDAC4,STK36,KLHL1,TRPC5,AMFR,FTO,PPFIA2,ADAM28,AKAP6,ACSBG1,POU6F2,TENM3,LINGO2,OPCML,MARK2,ATF2,RBBP8,GRID2,ZNF423,LRP2,SEMA6D,NTF3,FER,SNRK,CAMK4,NTNG1,DDX10,ISX,SGCD,TMEM108,GABRB3,GRM7,RAPGEF2,NAV3,IMMP2L,GTAF2I,ATXN1,PRKCQ,KIRREL3,GABRG2,CPS1,PRKCH,NRXN3,KRT25,DLCL1,ATP8A2,SLC24A3,UBE3A,APC,MACROD2,TTL5,INO80,AUTS2,TFF1,EPHB2,PDLIM5,XYL1,PRTG,NBN,ADAMTS18,CTNND2,COL22A1,SETD2,PACSIN2,DOCK2,SDCCAG8,FLVCR1,NRP1,CDH13,MDGA2,RPGRI1,DACH1,DAB1,ALK,LDLRAD4,SEMA3A,SEMA3E,MYEF2,DCLK1,KIF16B,NRIP1,CDH2,ARID5B,TENM2,TANC1,SERPINB7,SYCP1,HDAC9,PIK3R3,MAP2K6,FSTL4,MTOR,RORB,GABRB1,FBLN1,SH3KBP1,FHL2,NCAPG2,RGS7,TTC39C,SPRED1,SIPAL13,ADAM10,GALC,FLNB,PAPPA2,ABCB5,SPECC1,DPY19L2,CSMD1,GLI3,NTRK3,RXFP1,FBN1,SGCG,HYDIN,TBX15,BMPER,ZNF521,HMG A2,NSUN2,DNM3,SYT1,SYNDIG1,ASXL3,DPF3,SCAPER,NPHP4,PPARA,PLXNA2,PTPRD,RORA,MYH15,SHISA6,PLCB1,LOXL2,BPTF,PRKG1,RASGRP1,ELAVL4,CDH9,DMBT1,MAGI2,NELL1,ABI1,ASTC2,RALA,DOCK10,FNDC3A,NECAB1,PRKD1,BCL2L1,HDAC2,ETS1,TNNR,RYR2,SEMA3D,TGFA,PRLR,TBX20,FAT3,MTMR2,ATF6,EYS,VCL,ATAT1,ROBO2,IFT81,CDH23,AKAP13,NEDD9,ENPP1,UNC13C,PCP4,RIMS2,SCN8A,RAB27A,EYA4,L3MBTL3,HIVEP3,SEMA5A,CABL |

|                |                                                                     |                            |                                                                                                                                                                                                                                                                                                                                                                                                                                                                                                                                                                                                                                                                                                                                                                                                                                                                                                                                                                                                                                                                                                                                                                                                                                                                                                                                                                                                                                                                                                                                                    |
|----------------|---------------------------------------------------------------------|----------------------------|----------------------------------------------------------------------------------------------------------------------------------------------------------------------------------------------------------------------------------------------------------------------------------------------------------------------------------------------------------------------------------------------------------------------------------------------------------------------------------------------------------------------------------------------------------------------------------------------------------------------------------------------------------------------------------------------------------------------------------------------------------------------------------------------------------------------------------------------------------------------------------------------------------------------------------------------------------------------------------------------------------------------------------------------------------------------------------------------------------------------------------------------------------------------------------------------------------------------------------------------------------------------------------------------------------------------------------------------------------------------------------------------------------------------------------------------------------------------------------------------------------------------------------------------------|
|                |                                                                     |                            | ES1, BCL11A, FREM1, DCC, CTNNA2, CHN1, ETV6, PARD3, NRG1, PRKC<br>A, FMN2, SEMA3C, TOP1                                                                                                                                                                                                                                                                                                                                                                                                                                                                                                                                                                                                                                                                                                                                                                                                                                                                                                                                                                                                                                                                                                                                                                                                                                                                                                                                                                                                                                                            |
| GO:01<br>20036 | plasma<br>membrane<br>bounded<br>cell<br>projection<br>organization | 2.142170758<br>6527715e-24 | CD44, SEMA4D, RPS6KA5, TAOK3, CD38, FBXO31, BCL2, CDC42EP3, N<br>CAM1, GRIP1, TANC2, CSMD3, JAK2, KALRN, NEGR1, EPB41L3, LAMA1<br>, PARVB, CDH11, NRXN1, IL1RAPL1, WDPCP, LAMA3, ZDHHC17, BBS9,<br>CTNNA1, MYO9A, NTRK2, OCLN, NCAM2, TIAM2, LRRC49, CNTN1, PTPR<br>G, NUMB, DNAH8, UNC5D, NREP, DLG5, ARHGAP24, SLIT2, ROR1, ADAM<br>TSL1, HECW1, KANK1, MACF1, RAP1A, TRIO, ABL2, SPAG16, CCDC141<br>, CNTN4, FGD4, ITGA1, PLS1, SLIT3, GRIN2B, ROBO1, PAK3, CHODL,<br>TMEM67, BBS2, DSCAM, SDK1, EPHA6, NTN1, IGF1R, NLGN1, CNTNAP2<br>, MAP2, CAMK1D, FLRT2, PTPRO, INSR, COBL, CRTAC1, CUX1, ANK3, R<br>ELN, CDH4, TNR, VAV3, CNTN6, APP, CCDC88A, SPOCK1, PLCE1, PAK1<br>, FRY, EPS8, CECR2, RASGRF1, LRRC4C, ALCAM, PPP1R9A, ADAMTS16<br>, FRYL, TIAM1, PHACTR1, SLC39A12, DISC1, ASAP1, FYN, IFT43, EP<br>HA7, S100B, TOX, PCDH15, CNTN5, RIMS1, EPHB1, ARMC2, SNAP29, H<br>ERC1, EXT1, EFNA5, CDC14B, HDAC4, STK36, KLHL1, TRPC5, PPPIA2<br>, TENM3, MARK2, GRID2, ZNF423, LRP2, SEMA6D, NTF3, FER, TTC29,<br>NTNG1, TMEM108, GRM7, RAPGEF2, PRKCQ, KIRREL3, NUDCD3, NRXN3<br>, ATP8A2, UBE3A, APC, AUTS2, EPHB2, PDLIM5, PRTG, CTNND2, SDCC<br>AG8, NRP1, CDH13, RPGRIP1, DAB1, ALK, SEMA3A, SEMA3E, DCLK1, C<br>DH2, TENM2, TANC1, FSTL4, MTOR, CD2AP, TTC39C, GLI3, NTRK3, HY<br>DIN, DNM3, SYT1, PLXNA2, PTPRD, PRKG1, ELAVL4, MAGI2, ABI1, RA<br>LA, DOCK10, PRKD1, HDAC2, TNN, SEMA3D, FAT3, MTMR2, VCL, ATAT1<br>, ROBO2, IFT81, CDH23, NEDD9, RIMS2, SEMA5A, BCL11A, DCC, CTNN<br>A2, CHN1, PARD3, SEMA3C, PCNT                   |
| GO:00<br>30030 | cell<br>projection<br>organization                                  | 3.621199812<br>300097e-24  | CD44, SEMA4D, RPS6KA5, TAOK3, CD38, FBXO31, BCL2, CDC42EP3, N<br>CAM1, GRIP1, TANC2, CSMD3, JAK2, KALRN, NEGR1, EPB41L3, LAMA1<br>, PARVB, CDH11, NRXN1, IL1RAPL1, WDPCP, LAMA3, ZDHHC17, BBS9,<br>CTNNA1, MYO9A, NTRK2, OCLN, NCAM2, TIAM2, LRRC49, CNTN1, PTPR<br>G, NUMB, DNAH8, UNC5D, NREP, DLG5, ARHGAP24, SLIT2, ROR1, ADAM<br>TSL1, HECW1, KANK1, MACF1, RAP1A, TRIO, ABL2, SPAG16, CCDC141<br>, CNTN4, FGD4, ITGA1, ITGA8, PLS1, SLIT3, GRIN2B, ROBO1, PAK3,<br>CHODL, TMEM67, BBS2, DSCAM, SDK1, EPHA6, NTN1, IGF1R, NLGN1, D<br>NAH9, CNTNAP2, MAP2, CAMK1D, FLRT2, PTPRO, INSR, COBL, CRTAC1<br>, CUX1, ANK3, RELN, CDH4, TNR, VAV3, CNTN6, APP, CCDC88A, SPOCK<br>1, PLCE1, PAK1, FRY, EPS8, CECR2, RASGRF1, LRRC4C, ALCAM, PPP1<br>R9A, ADAMTS16, FRYL, TIAM1, PHACTR1, SLC39A12, DISC1, ASAP1,<br>FYN, IFT43, EPHA7, S100B, TOX, PCDH15, CNTN5, RIMS1, EPHB1, AR<br>MC2, SNAP29, HERC1, EXT1, EFNA5, CDC14B, HDAC4, STK36, KLHL1,<br>TRPC5, PPPIA2, TENM3, MARK2, GRID2, ZNF423, LRP2, SEMA6D, NTF<br>3, FER, TTC29, NTNG1, TMEM108, GRM7, RAPGEF2, PRKCQ, KIRREL3,<br>NUDCD3, NRXN3, ATP8A2, UBE3A, APC, AUTS2, EPHB2, PDLIM5, PRTG<br>, CTNND2, PACSIN2, SDCCAG8, NRP1, CDH13, RPGRIP1, DAB1, ALK, S<br>EMA3A, SEMA3E, DCLK1, CDH2, TENM2, TANC1, FSTL4, MTOR, CD2AP,<br>TTC39C, GLI3, NTRK3, HYDIN, DNM3, SYT1, PLXNA2, PTPRD, PRKG1,<br>ELAVL4, MAGI2, ABI1, RALA, DOCK10, PRKD1, HDAC2, TNN, SEMA3D,<br>FAT3, MTMR2, VCL, ATAT1, ROBO2, IFT81, CDH23, NEDD9, RIMS2, SE<br>MA5A, BCL11A, DCC, CTNNA2, CHN1, PARD3, SEMA3C, PCNT |
| GO:00<br>22008 | neuro<br>genes<br>is                                                | 2.553501793<br>363751e-23  | RTN1, SEMA4D, RPS6KA5, TAOK3, CD38, FBXO31, TRAPPC9, BCL2, TH<br>RB, NCAM1, GRIP1, ASTN2, TANC2, CSMD3, NTN4, JAK2, KALRN, USH2<br>A, NEGR1, ZNF536, EPB41L3, LAMA1, CDH11, GRIN2A, NRXN1, IL1RA<br>PL1, WDPCP, LAMA3, ZDHHC17, CTNNA1, MYO9A, NTRK2, NCAM2, TIAM<br>2, MYT1L, CNTN1, ATP8A2, PTPRG, NUMB, MTPN, SOX6, VCAN, UNC5D, NR<br>EP, GABRA5, DOK5, DLG5, ASTN1, SLIT2, ROR1, ADAMTSL1, CRB1, HE<br>CW1, ERBB4, KANK1, MACF1, RAP1A, TRIO, ABL2, EML1, CCDC141, CN<br>TN4, ITGA1, TCF12, RUNX1, ALDH1A2, EYA1, PLS1, SLIT3, ROBO1, P<br>AK3, BRINP1, CHODL, SOX5, DSCAM, SDK1, SLC1A1, GRM5, EPHA6, NT<br>N1, IGF1R, NLGN1, CNTNAP2, MAP2, CAMK1D, FLRT2, PTPRO, COBL, C<br>RTAC1, CUX1, ANK3, TBCD, RELN, CDH4, TNR, CNTN6, APP, CCDC88A,<br>SPOCK1, PAK1, HCN1, FRY, TENM4, CECR2, RASGRF1, LRRC4C, ALCAM<br>, PPP1R9A, RARB, TCF4, FRYL, TIAM1, PBX1, PHACTR1, SLC39A12, D<br>ISC1, NTM, ASAP1, FYN, EPHA7, NAV2, S100B, TOX, PCDH15, CNTN5,<br>RIMS1, EPHB1, HERC1, EXT1, EFNA5, KLHL1, TRPC5, PPPIA2, TENM3<br>, OPCML, MARK2, GRID2, LRP2, SEMA6D, NTF3, NTNG1, TMEM108, GRM<br>7, RAPGEF2, NAV3, PRKCQ, KIRREL3, PRKCH, NRXN3, ATP8A2, UBE3A<br>, AUTS2, EPHB2, PDLIM5, PRTG, CTNND2, SDCCAG8, NRP1, MDGA2, RP                                                                                                                                                                                                                                                                                                                      |

|            |                                |                        |                                                                                                                                                                                                                                                                                                                                                                                                                                                                                                                                                                                                                                                                                                                                                                                                                                                                                                                                                                                                                                                                                                                                                                                                                                                                                                                                                                                                                                                                                                                                                                                                                                                                                                                                                                                                                                                                                                                                                                                                  |
|------------|--------------------------------|------------------------|--------------------------------------------------------------------------------------------------------------------------------------------------------------------------------------------------------------------------------------------------------------------------------------------------------------------------------------------------------------------------------------------------------------------------------------------------------------------------------------------------------------------------------------------------------------------------------------------------------------------------------------------------------------------------------------------------------------------------------------------------------------------------------------------------------------------------------------------------------------------------------------------------------------------------------------------------------------------------------------------------------------------------------------------------------------------------------------------------------------------------------------------------------------------------------------------------------------------------------------------------------------------------------------------------------------------------------------------------------------------------------------------------------------------------------------------------------------------------------------------------------------------------------------------------------------------------------------------------------------------------------------------------------------------------------------------------------------------------------------------------------------------------------------------------------------------------------------------------------------------------------------------------------------------------------------------------------------------------------------------------|
|            |                                |                        | GRIP1, DAB1, ALK, SEMA3A, SEMA3E, MYEF2, DCLK1, CDH2, TENM2, HDAC9, FSTL4, MTOR, RORB, GABRB1, GLI3, NTRK3, ZNF521, DNMT3, SYT1, NPHP4, PLXNA2, PTPRD, RORA, PRKG1, ELAVL4, MAGI2, ABI1, DOCK10, PRKD1, HDAC2, TNN, SEMA3D, TBX20, FAT3, MTMR2, VCL, ATAT1, ROBO2, CDH23, PCP4, RIMS2, SEMA5A, BCL11A, DCC, CTNNA2, CHN1, ETV6, PARD3, NRG1, SEMA3C                                                                                                                                                                                                                                                                                                                                                                                                                                                                                                                                                                                                                                                                                                                                                                                                                                                                                                                                                                                                                                                                                                                                                                                                                                                                                                                                                                                                                                                                                                                                                                                                                                              |
| GO:0032990 | cell part morphogenesis        | 4.292831504561165e-23  | CD44, SEMA4D, RPS6KA5, TAOK3, FBXO31, BCL2, NCAM1, GRIP1, TANC2, KALRN, EPB41L3, LAMA1, CDH11, NRXN1, IL1RAPL1, LAMA3, ZDHHC17, MYO9A, NTRK2, TIAM2, CNTN1, NUMB, UNC5D, SLIT2, ADAMTSL1, HECW1, KANK1, MACF1, TRIO, CCDC141, CNTN4, ITGA1, SLIT3, ROBO1, PAK3, CHODL, NUBPL, DSCAM, EPHA6, NTN1, IGF1R, NLGN1, CNTNAP2, MAP2, FLRT2, PTPRO, COBL, CUX1, ANK3, RELN, CDH4, TNFR, CNTN6, APP, PAK1, LRRC4C, ALCAM, TIAM1, PHACTR1, DISC1, FYN, EPHA7, S100B, CNTN5, RIMS1, EPHB1, EXT1, EFNA5, TRPC5, PPFIA2, MARK2, LRP2, SEMA6D, NTF3, NTNG1, TMEM108, RAPGEF2, PRKCQ, KIRREL3, NRXN3, ATP8A2, UBE3A, AUTS2, EPHB2, PDLIM5, PRTG, CTNND2, PACSIN2, NRP1, DAB1, SEMA3A, SEMA3E, DCLK1, CDH2, FSTL4, GLI3, DNMT3, SYT1, PLXNA2, PTPRD, ELAVL4, ABI1, DOCK10, BCL2L1, TNN, SEMA3D, VCL, ROBO2, RIMS2, SEMA5A, BCL11A, DCC, CTNNA2, CHN1, PARD3, SEMA3C                                                                                                                                                                                                                                                                                                                                                                                                                                                                                                                                                                                                                                                                                                                                                                                                                                                                                                                                                                                                                                                                                                                                             |
| GO:0048858 | cell projection morphogenesis  | 4.4061159722917124e-23 | CD44, SEMA4D, RPS6KA5, TAOK3, FBXO31, BCL2, NCAM1, GRIP1, TANC2, KALRN, EPB41L3, LAMA1, CDH11, NRXN1, IL1RAPL1, LAMA3, ZDHHC17, MYO9A, NTRK2, TIAM2, CNTN1, NUMB, UNC5D, SLIT2, ADAMTSL1, HECW1, KANK1, MACF1, TRIO, CCDC141, CNTN4, ITGA1, SLIT3, ROBO1, PAK3, CHODL, DSCAM, EPHA6, NTN1, IGF1R, NLGN1, CNTNAP2, MAP2, FLRT2, PTPRO, COBL, CUX1, ANK3, RELN, CDH4, TNFR, CNTN6, APP, PAK1, LRRC4C, ALCAM, TIAM1, PHACTR1, DISC1, FYN, EPHA7, S100B, CNTN5, RIMS1, EPHB1, EXT1, EFNA5, TRPC5, PPFIA2, MARK2, LRP2, SEMA6D, NTF3, NTNG1, TMEM108, RAPGEF2, PRKCQ, KIRREL3, NRXN3, ATP8A2, UBE3A, AUTS2, EPHB2, PDLIM5, PRTG, CTNND2, PACSIN2, NRP1, DAB1, SEMA3A, SEMA3E, DCLK1, CDH2, FSTL4, GLI3, DNMT3, SYT1, PLXNA2, PTPRD, ELAVL4, ABI1, DOCK10, TNN, SEMA3D, VCL, ROBO2, RIMS2, SEMA5A, BCL11A, DCC, CTNNA2, CHN1, PARD3, SEMA3C                                                                                                                                                                                                                                                                                                                                                                                                                                                                                                                                                                                                                                                                                                                                                                                                                                                                                                                                                                                                                                                                                                                                                            |
| GO:0050794 | regulation of cellular process | 4.7838800311472634e-23 | CD44, SAMD4A, KCNMA1, C10ORF90, PKNOX2, ZHX3, APBB2, PTPRR, SCAF8, RTN1, ERG, PARN, PDE1C, SEMA4D, INIP, MED13L, EVC, TEAD1, NFIA, SYN3, RPS6KA5, TAOK3, PRKCB, EIF4G3, SLC8A1, ANKRD6, KCNC1, GPR55, DNAJC15, SIAH3, CD38, ZNF257, FBXO31, PIWIL3, TRAPPC9, BCL2, CAMTA1, SAMS1, CHFR, THADA, COL18A1, TOX3, THRB, DNAH11, ZSCAN5C, RAG1, CDC42EP3, GRIK2, IGSF11, SNX25, UNC13B, MAPK10, NCAM1, KDM4B, GNG12, IL6R, KCNQ5, CDH8, ZBTB20, SCN11A, ATP10A, SORBS2, SKAP2, HS1BP3, KCNJ6, CASP5, KCNK10, BRD4, GPR158, ZNF568, NDRG2, GRIP1, APBA2, TLK1, ASTN2, TANC2, CSMD3, DLGAP1, RCAN1, JAK2, TM9SF4, BICD1, ABCG8, OTUD7A, TPTE2, KALRN, USH2A, NEGR1, FGF12, CACNG2, BTBD9, NFAT5, FLI1, TRHDE, ZNF536, EPB41L3, LAMA1, CDH11, ZBTB7C, GRIN2A, MAST4, NRXN1, ARID1B, IL1RAPL1, WDPCP, MAGI1, LAMA3, ADCYAP1R1, CTDP1, DPP6, GRID1, RPS6KA2, SMOC2, ZDHHC17, KCNH1, CDCDC1, CACNA1C, BMF, EXOC4, WDR70, FAM83B, CTNNA1, MYO9A, NTRK2, FOXN3, OCLN, NLK, ITGBL1, RASGEF1B, AFAP1, TIAM2, MYT1L, SRGAP2B, IQCJ-SCHIP1, SMARCA4, RNF152, CNTN1, ZNRF3, MEOX2, ENPEP, PLEKHB2, GLIS3, NRG3, PTPRG, MC2R, BTBD11, ELMO1, SLC24A4, CABIN1, FBXL17, GAS2, GRIK3, CACNB2, PDE10A, NUMB, STXB4, MED15, MTPN, SOX6, MECOM, PDE4DIP, STK32B, RGS12, SHANK2, RAPGEF5, UBE2E2, KCTD8, UNC5D, ZNF567, NREP, GABRA5, DOK5, DLG5, CFDP1, SMARCA1, ZIM3, ATRNL1, CHRM3, CPE, ARHGAP24, SPRED2, IGHV1OR15-9, SLIT2, PITPNC1, MYLK3, ABCA5, ROR1, GLP2R, SLC4A4, ZNF675, CSNK2A1, DTNA, AKT3, KMT2C, KCNE4, TRIM5, KCNS3, PSD3, ALPK2, ABCA13, HECW1, RAP1GDS1, AFF3, ERBB4, KANK1, ATRX, DMRT1, BID, MACF1, MNAT1, TAF4B, RAP1A, TRIO, CTNBL1, RAD51B, PTPRE, DUSP22, CHSY1, MYOM1, PSG8, EXT2, ZSCAN30, OR4C46, ABL2, MAP3K5, NOS1, ABCG1, RGS3, MAML2, RERG, HTR2C, NEK4, CACNA1E, CTIF, CNTN4, TBC1D5, SAMD13, SLC40A1, SLC03A1, GABRR2, PIK3C3, TRAF3, SND1, CHD6, FGD4, ETS2, ITGA1, TCF12, ZNF721, HIRA, CORO2B, ITGA8, GRIK4, RUNX1, KIR3DL2, ALDH1A2, GABRG1, TSHZ2, MAPK9, ESRRG, PTGFR, IGHV1OR21- |



|  |  |                                                                                                                                                                                                                                                                                                                                                                                                                                                                                                                                                                                                                                                                                                                                                                                                                                                                                                                                                                                                                                                                                                                                                                                                                                                                                                                                                                                                                                                                                                                                                                                                                                                                                                                                                                                                                                                                                                                                                                                                                                                                                                                                                                                                                                                                                                                                                                                                                                                                                                                                                                                                                                                                                                                                                                                                                                                                                                                                                                                                                                                                                                                                                                                                                                                                                                                                                                                                                                                                                                                                                                                                                                                        |
|--|--|--------------------------------------------------------------------------------------------------------------------------------------------------------------------------------------------------------------------------------------------------------------------------------------------------------------------------------------------------------------------------------------------------------------------------------------------------------------------------------------------------------------------------------------------------------------------------------------------------------------------------------------------------------------------------------------------------------------------------------------------------------------------------------------------------------------------------------------------------------------------------------------------------------------------------------------------------------------------------------------------------------------------------------------------------------------------------------------------------------------------------------------------------------------------------------------------------------------------------------------------------------------------------------------------------------------------------------------------------------------------------------------------------------------------------------------------------------------------------------------------------------------------------------------------------------------------------------------------------------------------------------------------------------------------------------------------------------------------------------------------------------------------------------------------------------------------------------------------------------------------------------------------------------------------------------------------------------------------------------------------------------------------------------------------------------------------------------------------------------------------------------------------------------------------------------------------------------------------------------------------------------------------------------------------------------------------------------------------------------------------------------------------------------------------------------------------------------------------------------------------------------------------------------------------------------------------------------------------------------------------------------------------------------------------------------------------------------------------------------------------------------------------------------------------------------------------------------------------------------------------------------------------------------------------------------------------------------------------------------------------------------------------------------------------------------------------------------------------------------------------------------------------------------------------------------------------------------------------------------------------------------------------------------------------------------------------------------------------------------------------------------------------------------------------------------------------------------------------------------------------------------------------------------------------------------------------------------------------------------------------------------------------------------|
|  |  | <p>1,ZNF595,CDH17,PEAK1,EYA1,MORC3,ANKS1B,P2RX6,AKAP10,SPOCK3,FRMD6,PLS1,SPON1,ANK2,PLA2G4A,SLC1A2,ZBTB16,SUP T3H,SLIT3,GRIN2B,ZNF518A,PHC2,ROBO1,ZNF578,EGFLAM,PAK 3,DGKB,GARNL3,DPH6,EBF1,TNKS,KLF12,NDFIP2,GABRA2,MDM1,OVOL2,FCHSD2,SGMS1,ITPR2,BRINP1,MLLT3,BCL2L13,LEMD3,KHDRBS2,RNF138,CHODL,GABPA,PRICKLE2,ITGB3BP,CACNA2D3,DGKK,TMEM67,PRKCE,GLIS1,PSG9,ARHGEF11,PRKAA2,PACRG,BBS2,IL1RAPL2,EDIL3,CDYL2,HIVEP2,KCNH8,GRIK1,SOX5,DSCAM,DGKI,RIN3,ANKFN1,DNMBP,EFHB,KDM4C,SLC1A1,GRM5,EPHA6,NTN1,ARAP2,NR5A2,LDB2,IGF1R,SPTB,SNX30,NLGN1,SHISA9,OR9Q1,JAM2,ALX4,CNTNAP2,MAP2,KCNIP4,CFTR,CAMK1D,FLRT2,MLLT10,NOS1AP,PTPRO,RBMS3,INSR,COBL,CTNNA11,CLEC16A,PHF20L1,ITGA9,MTRF1,CATSPER2,EGLN3,CUX1,ANK3,MORC2,GMD S,CNIH3,DOCK3,TBCD,GPC6,RELN,RASGRF2,TRPS1,STK38,CDH4,TNR,ADCY9,DPP10,CELF4,DAPK1,VAV3,INPP5A,ZNF600,VRK1,ZNF678,CNTN6,CLIC6,ZNF420,APP,FBLN5,PUM1,CCDC88A,ARNT2,KCTD1,SPOCK1,HPSE2,PLCE1,ADAM12,PAK1,GNAL,MITF,IGF2BP3,CACNA2D1,ADCK1,HCN1,PPP1R13B,CHRM5,NSMCE2,ZNF208,CXADR,EPS8,LRFN5,UTRN,GPC5,TENM4,PRR16,TSPAN13,GHR,DX4,RIPK4,RASGRF1,RIN2,PRDM16,FRMD5,RNF217,USP7,RBFOX1,MEIS2,KIR2DL4,STARD13,SCP2,KL,LRRC4C,ALCAM,PPP1R9A,AVEN,TMEM117,ADAMTS16,TASP1,MICU1,ZZEF1,LTBP1,SLAMF1,RGL1,BACE2,INO80D,CLSTN2,RARB,DIDO1,WDR12,TCF4,TIAM1,BX1,PHACTR1,MLIP,SORCS2,PRIM2,SLC39A12,DISC1,FMN1,RALGPS1,ARHGAP42,ZFPM2,SVEP1,ASAP1,PCBP3,FRMPD4,EDAR,EGF,PDGFD,FYN,FAM3B,KCND3,EPHA7,FHIT,NSG2,GRIA1,ZNF627,TABD2B,SPIDR,STK3,CNOT7,MSR1,PSIP1,USP18,S100B,NET1,TOX,ESR1,ARHGAP12,GABRG3,PLCXD3,KCNAB1,GRM1,PDE4D,ERC2,PRKACB,GNNG2,PDE3A,RIMS1,POR,L3MBTL4,DOCK4,ATP6V1E1,FRMD4A,MCTP2,WWOX,HUNK,CNKS2R,FUT8,EPHB1,SSBP2,CREM,CTTNBP2,FHOD3,EFEMP1,TNRC6B,AJAP1,ABCC9,SGS1L,HERC1,DOCK1,PARP15,FLT1,EXT1,EFNA5,NXN,CDC14B,C14ORF39,HDAC4,ZNF717,STK36,TRPC5,AMFR,PLCB4,ATP9A,FTO,PPPIA2,SH3BP5,AKAP6,SORCS3,POU6F2,TENM3,LINGO2,MARK2,ATF2,ZNF880,RB BP8,GRID2,ZNF423,LRP2,SEMA6D,ZNF573,C2,RALGPS2,NTF3,FER,SNRK,CAMK4,CELF2,TP53I11,NTNG1,MAPRE2,ISX,RAD51AP1,SGCD,TMEM108,RIC8B,GABRB3,TPTE,GRM7,SLC39A8,RAPGEF2,NAV3,MX1,ZNF615,GTTF2I,ATXN1,PRKCQ,GABRG2,PRKCH,NRXN3,RHPN2,RABGAP1L,DLC1,NSG1,GABBR2,KCND2,ATP8A2,UBE3A,GR1A4,IDE,APC,ZBTB25,INO80,AUTS2,TFF1,EPHB2,SCAF4,ERC1,ZNF850,PDLIM5,AGO3,MCTP1,MOB3B,RYR3,NBAS,PRTG,NBN,ADAMTS18,RGMB,CTNND2,SETD2,PACSIN2,PKP1,DOCK2,NUP214,SDC CAG8,NRP1,CDH13,RFC3,ZNF879,DACH1,TRDN,SLC2A13,ZNF397,DAB1,RFTN1,ALK,EVC2,LDLRAD4,SEMA3A,SEMA3E,MGAT5,MALR D1,MYEF2,DCLK1,MAGI3,KIF16B,NRIP1,CDH2,ARID5B,SIPAIL2,CCNG2,RCAN2,LRRC69,TENM2,TANC1,SERPINB7,VPS41,SYCP1,ZNF407,ASB3,HDAC9,PIK3R3,MAP2K6,FSTL4,ARHGAP28,MTOR,STK38L,KSR1,RALGAP2,RORB,GABRB1,FBLN1,ST8SIA1,BLM,SH3KBP1,FHL2,CADPS,NEU3,NCAPG2,RGS7,STK32A,CD2AP,ZFP30,USP25,SPRED1,SIPAIL3,ADAM10,DRAM1,KANSL1,LRFN2,FLNB,SCAI,PAPPA2,PTPRT,TRERF1,SLC24A2,GLI3,NTRK3,RXFP1,FBN1,RAB31,CTNNA3,VPS13D,ABHD17C,ZNF292,TBX15,RAPGEF4,BMPE R,ANKRD31,ZNF521,PDE1A,ATF7IP,HMGA2,MX2,CREB5,NSUN2,DEFA3,PTPRK,SORCS1,TBC1D4,DNM3,SYT1,APIP,SYNDIG1,ASXL3,DPF3,NPHP4,DOCK9,PPP1R12B,SACS,PPARA,PLXNA2,PTPRD,RO RA,SHISA6,PLCB1,LOXL2,BPTF,PRKG1,RASGRP1,ELAVL4,NLRC5,STXBP6,MXI1,TTC28,MAGI2,NELL1,PLCL1,ABI1,TSHZ3,ASIC2,RALA,DOCK10,TRPM1,CACNG3,NECAB1,PRKD1,ATP8A1,TNFAIP8,BCL2L1,HDAC2,ETS1,MRPS27,TNN,RYR2,SEMA3D,BANP,TGFA,PRLR,TBX20,PTPRA,FAT3,OR11G2,MTMR2,KCNH5,ATF6,IL16,VCL,DEPTOR,BACH1,ATAT1,ROBO2,EWSR1,IPT81,ZMYND11,RGS6,SRGAP3,AKAP13,WDR41,NEDD9,MYRIP,ENPP1,UNC13C,PCP4,RIMS2,STAC,SCN8A,RAB27A,EYA4,RALGAP1,L3MBTL3,DLGAP2,POMT2,HIVEP3,CLIP1,SEMA5A,CABLES1,PRDM15,OR4N2,BCL11A,DCC,ZNF112,CTNNA2,CHN1,ETV6,VPS13C,KCNJ15,PARD3,NRG1,CAST,FANK1,ZNF845,NPAS3,PRKCA,FMN2,SEMA3C,FANCB,CSF2RB,PC</p> |
|--|--|--------------------------------------------------------------------------------------------------------------------------------------------------------------------------------------------------------------------------------------------------------------------------------------------------------------------------------------------------------------------------------------------------------------------------------------------------------------------------------------------------------------------------------------------------------------------------------------------------------------------------------------------------------------------------------------------------------------------------------------------------------------------------------------------------------------------------------------------------------------------------------------------------------------------------------------------------------------------------------------------------------------------------------------------------------------------------------------------------------------------------------------------------------------------------------------------------------------------------------------------------------------------------------------------------------------------------------------------------------------------------------------------------------------------------------------------------------------------------------------------------------------------------------------------------------------------------------------------------------------------------------------------------------------------------------------------------------------------------------------------------------------------------------------------------------------------------------------------------------------------------------------------------------------------------------------------------------------------------------------------------------------------------------------------------------------------------------------------------------------------------------------------------------------------------------------------------------------------------------------------------------------------------------------------------------------------------------------------------------------------------------------------------------------------------------------------------------------------------------------------------------------------------------------------------------------------------------------------------------------------------------------------------------------------------------------------------------------------------------------------------------------------------------------------------------------------------------------------------------------------------------------------------------------------------------------------------------------------------------------------------------------------------------------------------------------------------------------------------------------------------------------------------------------------------------------------------------------------------------------------------------------------------------------------------------------------------------------------------------------------------------------------------------------------------------------------------------------------------------------------------------------------------------------------------------------------------------------------------------------------------------------------------------|

|                |                                                                      |                            |                                                                                                                                                                                                                                                                                                                                                                                                                                                                                                                                                                                                                                                                                                                                                                                                                                                                                                                                                                                                                                                                                                                                                                                                                                                                                                                                                                                                                                                                                                                                                                                                                                                                                                                                                                                                                                                                                                                                                                                                                                                                                                                                                                                                                                                                                                                                                                                                                                                                                                                                                                                                                                                                                                                                                                                                                    |
|----------------|----------------------------------------------------------------------|----------------------------|--------------------------------------------------------------------------------------------------------------------------------------------------------------------------------------------------------------------------------------------------------------------------------------------------------------------------------------------------------------------------------------------------------------------------------------------------------------------------------------------------------------------------------------------------------------------------------------------------------------------------------------------------------------------------------------------------------------------------------------------------------------------------------------------------------------------------------------------------------------------------------------------------------------------------------------------------------------------------------------------------------------------------------------------------------------------------------------------------------------------------------------------------------------------------------------------------------------------------------------------------------------------------------------------------------------------------------------------------------------------------------------------------------------------------------------------------------------------------------------------------------------------------------------------------------------------------------------------------------------------------------------------------------------------------------------------------------------------------------------------------------------------------------------------------------------------------------------------------------------------------------------------------------------------------------------------------------------------------------------------------------------------------------------------------------------------------------------------------------------------------------------------------------------------------------------------------------------------------------------------------------------------------------------------------------------------------------------------------------------------------------------------------------------------------------------------------------------------------------------------------------------------------------------------------------------------------------------------------------------------------------------------------------------------------------------------------------------------------------------------------------------------------------------------------------------------|
|                |                                                                      |                            | NT,ST18                                                                                                                                                                                                                                                                                                                                                                                                                                                                                                                                                                                                                                                                                                                                                                                                                                                                                                                                                                                                                                                                                                                                                                                                                                                                                                                                                                                                                                                                                                                                                                                                                                                                                                                                                                                                                                                                                                                                                                                                                                                                                                                                                                                                                                                                                                                                                                                                                                                                                                                                                                                                                                                                                                                                                                                                            |
| GO:01<br>20039 | plasma<br>membrane<br>bounded<br>cell<br>projection<br>morphogenesis | 8.206233043<br>717653e-23  | CD44,SEMA4D,RPS6KA5,TAOK3,FBXO31,BCL2,NCAM1,GRIP1,TANC2,KALRN,EPB41L3,LAMA1,CDH11,NRXN1,IL1RAPL1,LAMA3,ZDHHC17,MYO9A,NTRK2,TIAM2,CNTN1,NUMB,UNC5D,SLIT2,ADAMTSL1,HECW1,KANK1,MACF1,TRIO,CCDC141,CNTN4,ITGA1,SLIT3,ROBO1,PAK3,CHODL,DSCAM,EPHA6,NTN1,IGF1R,NLGN1,CNTNAP2,MAP2,FLRT2,PTPRO,COBL,CUX1,ANK3,RELN,CDH4,TNR,CNTN6,APP,PAK1,LRRRC4C,ALCAM,TIAM1,PHACTR1,DISC1,FYN,EPHA7,S100B,CNTN5,RIMS1,EPHB1,EXT1,EFNA5,TRPC5,PPFIA2,MARK2,LRP2,SEMA6D,NTF3,NTNG1,TMEM108,RAPGEF2,PRKCQ,KIRREL3,NRXN3,ATP8A2,UBE3A,AUTS2,EPHB2,PDLIM5,PRTG,CTNND2,NRP1,DAB1,SEMA3A,SEMA3E,DCLK1,CDH2,FSTL4,GLI3,DNM3,SYT1,PLXNA2,PTPRD,ELAVL4,ABI1,DOCK10,TNN,SEMA3D,VCL,ROBO2,RIMS2,SEMA5A,BCL11A,DCC,CTNNA2,CHN1,PARD3,SEMA3C                                                                                                                                                                                                                                                                                                                                                                                                                                                                                                                                                                                                                                                                                                                                                                                                                                                                                                                                                                                                                                                                                                                                                                                                                                                                                                                                                                                                                                                                                                                                                                                                                                                                                                                                                                                                                                                                                                                                                                                                                                                                                                        |
| GO:00<br>32501 | multicellular<br>organismal<br>process                               | 1.431134959<br>9532275e-22 | CD44,KCNMA1,ZHX3,APBB2,PTPRR,RTN1,PARN,SEMA4D,IGSF3,EVC,TEAD1,NFIA,RPS6KA5,TAOK3,PRKCB,A2M,SLC8A1,KCNCL1,GPB5,SLIT1,CD38,FBXO31,PIWIL3,TRAPPC9,BCL2,MMP16,CAMTA1,COL18A1,THRB,DNAH11,RAG1,GRIK2,IGSF11,UNC13B,NCAM1,KDM4B,IL6R,ZBTB20,SCN11A,SORBS2,CASP5,KCNK10,ZNF568,NDRG2,GRIP1,APBA2,ASTN2,TANC2,CSMD3,DLGAP1,RCAN1,NTN4,JAK2,ABCG8,KALRN,USH2A,NEGR1,FGF12,CACNG2,BTBD9,FLI1,MEGF11,TRHDE,ZNF536,EPB41L3,LAMA1,CDH11,GRIN2A,NRXN1,ARID1B,IL1RAPL1,WDPCP,LAMA3,ADCYAP1R1,CTDP1,ADAMTS6,GRID1,RPS6KA2,SMOC2,ZDHHC17,KCNH1,CACNA1C,EXOC4,BBS9,CTNNA1,MYO9A,NTRK2,FOXN3,OCN,AK8,THSD7A,NCAM2,TIAM2,MYT1L,TMPRSS3,SRGAP2B,SMARCA4,CNTN1,ZNRF3,MEOX2,ENPEP,NRG3,PTPRG,SLC24A4,SYNE1,FBXL17,GAS2,CACNB2,NUMB,MED15,MTPN,SOX6,MECOM,SYBU,TRPM3,VCAN,NHS,SHANK2,RAPGEF5,UNC5D,NREP,GABRA5,DOK5,DLG5,ASTN1,CHRM3,CPE,CALD1,ARHGAP24,SPRED2,SLIT2,MYLK3,ABCA5,ROR1,SLC4A4,ADAMTSL1,KAZN,ZNF675,DTNA,AKT3,CRB1,KCNE4,ALPK2,HECW1,RAP1GDS1,AFF3,LCE1F,ERBB4,KANK1,ATRX,DMRT1,CHST8,MACF1,MNAT1,TAFA4B,RAP1A,TRIO,CTNBNB1,RAD51B,MYO3B,CHSY1,MYOM1,EXT2,OR4C46,ABL2,NOS1,ACACA,ABCG1,SPAG16,EML1,HTR2C,CCDC141,CNTN4,RNF17,SLC40A1,SLC03A1,GABRR2,SLC9C1,TRAF3,SNDD1,HMCN1,ETS2,ITGA1,TCF12,HIRA,CORO2B,ITGA8,RBM19,RUNX1,ALDH1A2,GABRG1,ESRRG,PTGFR,CDH17,EYA1,KIAA1217,MORC3,P2RX6,HSF2BP,PLS1,ANK2,PLA2G4A,SLC1A2,ZBTB16,SLIT3,GRIN2B,PHC2,ROBO1,ANKRD11,PAK3,DGKB,GABRA2,MDM1,SMPX,OVOL2,BRINP1,MLLT3,CHODL,GABPA,DGKK,PRKCE,GLIS1,PSG9,ARHGEF11,PRKAA2,PACRG,BBS2,IL1RAPL2,MYOM2,MYO3A,GRIK1,SOX5,DSCAM,DGKI,ANKFN1,KDM4C,SDK1,SLC1A1,GRM5,EPHA6,NTN1,CA10,NR5A2,LDB2,IGF1R,NLGN1,DNAH9,SHISA9,OR9Q1,SHROOM3,JAM2,ALX4,CORIN,CNTNAP2,MAP2,CFTR,CAMK1D,FLRT2,NOS1AP,PTPRO,CD96,INSR,COBL,CATSPER2,CRTAC1,CUX1,ANK3,LHFPL3,TBCD,GPC6,RELN,TRPS1,ADAMTS5,FBXO32,MYO18B,CDH4,TNR,ADCY9,OCA2,CELF4,VAV3,CNTN6,APP,PUM1,CCDC88A,ARNT2,RNLS,SPOCK1,PLCE1,TACC2,ADAM12,PAK1,GNAL,MITF,IGF2BP3,CACNA2D1,HCN1,CHRM5,FRY,CXADR,EPS8,LRFN5,UTRN,TENM4,CECR2,GHR,RASGRF1,RIN2,PRDM16,RBFOX1,MEIS2,KIR2DL4,STARD13,KL,LRRRC4C,ALCAM,PPP1R9A,ADAMTS16,LTBP1,SLAMF1,INO80D,CLSTN2,NEBL,RARB,MYH13,TCF4,FRYL,TIAM1,PBX1,PHACTR1,MLIP,SLC39A12,DISC1,FMN1,ARHGAP42,ZFPM2,PIEZO2,VSTM4,SVEP1,NTM,VTG1A,ASAP1,EDAR,EGF,PDGFD,FYN,KCND3,XRCC4,EPHA7,GRIA1,NAV2,STK3,COL19A1,MSR1,AP2B1,S100B,TOX,PCDH15,ESR1,GABRG3,SGCZ,GRM1,PDE4D,CNTN5,LRIG1,PRKACB,PDE3A,RIMS1,POR,DOCK4,CERS3,WWOX,PCSK2,FUT8,EPHB1,CREM,LSAMP,CTTNBP2,FHOD3,GREB1L,EFEMP1,ARMC2,AJAP1,IGSF21,ABCC9,HERC1,DOCK1,FAM126A,FLT1,EXT1,EFNA5,NXN,C14ORF39,HDAC4,STK36,KLHL1,TRPC5,AMFR,FTO,PPFIA2,ADAM28,AKAP6,ACSBG1,SORCS3,POU6F2,TENM3,LINGO2,OPCM1,MARK2,ATF2,TUSC3,RBBP8,GRID2,ZNF423,LRP2,SEMA6D,NTF3,FER,SNRK,CAMK4,CELF2,NTNG1,MAPRE2,ISX,SGCD,TMEM108,GABRB3,GRM7,SLC39A8,RAPGEF2,NAV3,IMMP2L,GTTF21,ATXN1,PRKCQ,SSPN,KIRREL3,GABRG2,CPS1,PRKCH,NRXN3,RHPN2,KRT25 |

|            |                                  |                        |                                                                                                                                                                                                                                                                                                                                                                                                                                                                                                                                                                                                                                                                                                                                                                                                                                                                                                                                                                                                                                                                                                                                                                                                                                                               |
|------------|----------------------------------|------------------------|---------------------------------------------------------------------------------------------------------------------------------------------------------------------------------------------------------------------------------------------------------------------------------------------------------------------------------------------------------------------------------------------------------------------------------------------------------------------------------------------------------------------------------------------------------------------------------------------------------------------------------------------------------------------------------------------------------------------------------------------------------------------------------------------------------------------------------------------------------------------------------------------------------------------------------------------------------------------------------------------------------------------------------------------------------------------------------------------------------------------------------------------------------------------------------------------------------------------------------------------------------------|
|            |                                  |                        | , DLC1, KCND2, ATP8A2, SNTB1, SLC24A3, UBE3A, IDE, LOXHD1, APC, MACROD2, TTLL5, INO80, AUTS2, TFF1, EPHB2, PDLIM5, XYLT1, PR TG, NBN, ADAMTS18, CTNND2, COL22A1, SETD2, DOCK2, SDCCAG8, FL VCR1, NRP1, CDH13, MDGA2, RPGRIP1, DACH1, TRDN, SLC2A13, DAB1, RFTN1, ALK, LDLRAD4, SEMA3A, SEMA3E, MYEF2, DCLK1, KIF16B, N RIP1, CDH2, ARID5B, TENM2, TANC1, PAPP, SERPINB7, SYCP1, ASB 3, HDAC9, PIK3R3, MAP2K6, FSTL4, MTOR, RORB, GABRB1, FBLN1, FH L2, NCAPG2, RGS7, CD2AP, TTC39C, SLC44A1, SPRED1, SIPA1L3, AD AM10, GALT, PAPP2, ABCB5, SPECC1, DPY19L2, CSMD1, SLC24A2, G LI3, NTRK3, RXFP1, FBN1, SGCG, HYDIN, CTNNA3, TBX15, BMPER, ZN F521, HMGA2, NSUN2, DNM3, SYT1, SYNDIG1, DPF3, SCAPER, NPHP4, PPP1R12B, PPARA, PLXNA2, PTPRD, RORA, MYH15, SHISA6, PLCB1, L OXL2, BPTF, PRKG1, RASGRP1, ELAVL4, MAGI2, NELL1, PLCL1, ABI1, TSHZ3, ASIC2, RALA, DOCK10, TRPM1, CACNG3, FNDC3A, NECAB1, P RKD1, ATP8A1, BCL2L1, HDAC2, ETS1, TNN, RYR2, SEMA3D, TGFA, PR LR, TBX20, FAT3, OR11G2, MTMR2, ATF6, EYS, IL16, VCL, ATAT1, RO BO2, IFT81, CDH23, AKAP13, NEDD9, ENPP1, PCP4, RIMS2, SLC5A1, STAC, SCN8A, RAB27A, EYA4, L3MBTL3, DLGAP2, SEMA5A, CABLES1, OR4N2, BCL11A, FREM1, DCC, CTNNA2, CHN1, ETV6, PARD3, NRG1, PR KCA, FMN2, SEMA3C, CSF2RB, TOP1 |
| GO:0048812 | neuron projection morphogenesis  | 1.4361700009989167e-22 | SEMA4D, RPS6KA5, TAOK3, FBXO31, BCL2, NCAM1, GRIP1, TANC2, KALRN, EPB41L3, LAMA1, CDH11, NRXN1, IL1RAPL1, LAMA3, ZDHHC17, MYO9A, NTRK2, TIAM2, CNTN1, NUMB, UNC5D, SLIT2, ADAMTSL1, HECW1, MACF1, TRIO, CCDC141, CNTN4, ITGA1, SLIT3, ROBO1, PAK3, CHODL, DSCAM, EPHA6, NTN1, IGF1R, NLGN1, CNTNAP2, MAP2, FLRT2, PTPRO, COBL, CUX1, ANK3, RELN, CDH4, TNF, CNTN6, APP, PAK1, LRRC4C, ALCAM, TIAM1, PHACTR1, DISC1, FYN, EPHA7, S100B, CNTN5, RIMS1, EPHB1, EXT1, EFNA5, TRPC5, PPFIA2, MARK2, LRP2, SEMA6D, NTF3, NTNG1, TMEM108, RAPGEF2, PRKCQ, KIRREL3, NRXN3, ATP8A2, UBE3A, AUTS2, EPHB2, PDLIM5, PRTG, CTNND2, NRP1, DAB1, SEMA3A, SEMA3E, DCLK1, CDH2, FSTL4, GLI3, DNM3, SYT1, PLXNA2, PTPRD, ELAVL4, ABI1, DOCK10, TNN, SEMA3D, VCL, ROBO2, RIMS2, SEMA5A, BCL11A, DCC, CTNNA2, CHN1, PARD3, SEMA3C                                                                                                                                                                                                                                                                                                                                                                                                                                                 |
| GO:0050808 | synapse organization             | 1.625415630662284e-22  | APBB2, SEMA4D, NFIA, UNC13B, CDH8, TANC2, KALRN, NEGR1, CACNG2, NRXN1, IL1RAPL1, NTRK2, CACNB2, SYBU, SHANK2, DLG5, ERBB4, GPHN, GRIN2B, PAK3, DGKB, GABRA2, IL1RAPL2, DSCAM, SDK1, SLC1A1, GRM5, NTN1, IGF1R, NLGN1, FLRT2, NOS1AP, PTPRO, INSR, ANK3, GPC6, RELN, TNF, APP, LRFN5, LRRC4C, PDZRN3, CLSTN2, DISC1, FRMPD4, FYN, EPHA7, CNTN5, ERC2, CNKSR2, EPHB1, CTNBP2, IGSF21, EFNA5, PPFIA2, LINGO2, GRID2, NTNG1, TMEM108, GABRB3, KIRREL3, GABRG2, NRXN3, UBE3A, EPHB2, ERC1, PDLIM5, CTNND2, NRP1, SEMA3E, CDH2, TANC1, ADAM10, LRFN2, NTRK3, ABHD17C, DNM3, SYNDIG1, PTPRD, SHISA6, ASIC2, DOCK10, MTMR2, ROBO2, NEDD9, UNC13C, CTNNA2, NRG1, CAST                                                                                                                                                                                                                                                                                                                                                                                                                                                                                                                                                                                                  |
| GO:0032989 | cellular component morphogenesis | 1.6423457858392527e-22 | CD44, SEMA4D, RPS6KA5, TAOK3, FBXO31, BCL2, NCAM1, GRIP1, TANC2, KALRN, EPB41L3, LAMA1, CDH11, NRXN1, IL1RAPL1, LAMA3, ZDHHC17, MYO9A, NTRK2, TIAM2, CNTN1, NUMB, UNC5D, PGM5, SLIT2, MYLK3, ADAMTSL1, HECW1, KANK1, MACF1, TRIO, CCDC141, CNTN4, ITGA1, ANK2, SLIT3, ROBO1, PAK3, CHODL, MYOM2, NUBPL, DSCAM, EPHA6, NTN1, IGF1R, NLGN1, CNTNAP2, MAP2, FLRT2, PTPRO, COBL, CUX1, ANK3, RELN, CDH4, TNF, CNTN6, APP, PAK1, TENM4, LRRC4C, ALCAM, NEBL, TIAM1, PHACTR1, DISC1, FYN, EPHA7, S100B, CNTN5, RIMS1, EPHB1, FHOD3, EXT1, EFNA5, TRPC5, PPFIA2, MARK2, LRP2, SEMA6D, NTF3, NTNG1, TMEM108, RAPGEF2, PRKCQ, KIRREL3, NRXN3, ATP8A2, UBE3A, AUTS2, EPHB2, PDLIM5, PRTG, CTNND2, PACSIN2, NRP1, DAB1, SEMA3A, SEMA3E, DCLK1, CDH2, FSTL4, GLI3, DNM3, SYT1, PLXNA2, PTPRD, ELAVL4, ABI1, DOCK10, BCL2L1, TNN, SEMA3D, MTMR2, VCL, ROBO2, AKAP13, RIMS2, SEMA5A, BCL11A, DCC, CTNNA2, CHN1, PARD3, SEMA3C                                                                                                                                                                                                                                                                                                                                               |
| GO:0000904 | cell morphogenesis involved      | 8.033467917334814e-22  | SEMA4D, RPS6KA5, FBXO31, BCL2, COL18A1, NCAM1, TANC2, NTN4, KALRN, USH2A, LAMA1, PARVB, CDH11, NRXN1, IL1RAPL1, WPCP, LAMA3, ZDHHC17, NTRK2, TIAM2, CNTN1, NUMB, UNC5D, ATRNL1, SLIT2, ADAMTSL1, HECW1, KANK1, MACF1, TRIO, CCDC141, CNTN4, ITGA8, PEAK1, FRMD6, PLS1, SLIT3, ROBO1, PAK3, CHODL, DSCAM, EPHA6, NTN1, IGF1R, NLGN1, MAP2, FLRT2, PTPRO, COBL, CUX1, ANK3, TBCD, RELN, CDH4, TNF, CNTN6, APP, PAK1, LRRC4C, ALCAM, TIAM1, PHACTR                                                                                                                                                                                                                                                                                                                                                                                                                                                                                                                                                                                                                                                                                                                                                                                                               |

|            |                                                       |                        |                                                                                                                                                                                                                                                                                                                                                                                                                                                                                                                                                                                                                                                                                                                                                                                                                                                                               |
|------------|-------------------------------------------------------|------------------------|-------------------------------------------------------------------------------------------------------------------------------------------------------------------------------------------------------------------------------------------------------------------------------------------------------------------------------------------------------------------------------------------------------------------------------------------------------------------------------------------------------------------------------------------------------------------------------------------------------------------------------------------------------------------------------------------------------------------------------------------------------------------------------------------------------------------------------------------------------------------------------|
|            | in differentiation                                    |                        | 1, DISC1, FYN, EPHA7, S100B, PCDH15, CNTN5, EPHB1, DOCK1, EXT1, EFNA5, TRPC5, PPFA2, MARK2, SEMA6D, FER, NTNG1, RAPGEF2, PRKCQ, NRXN3, ATP8A2, UBE3A, AUTS2, EPHB2, PDLIM5, PRTG, CTNND2, COL22A1, NRP1, DAB1, SEMA3A, SEMA3E, DCLK1, CDH2, FSTL4, FBLN1, SIPA1L3, FLNB, GLI3, DNM3, PLXNA2, PTPRD, ELAVL4, ABI1, DOCK10, TNN, SEMA3D, FAT3, VCL, ROBO2, CDH23, NEDD9, SEMA5A, BCL11A, DCC, CTNNA2, CHN1, PARD3, SEMA3C                                                                                                                                                                                                                                                                                                                                                                                                                                                       |
| GO:0048667 | cell morphogenesis involved in neuron differentiation | 1.4639044267434077e-21 | SEMA4D, RPS6KA5, FBXO31, BCL2, NCAM1, TANC2, KALRN, LAMA1, CDH11, NRXN1, IL1RAPL1, WDPCP, LAMA3, ZDHHC17, NTRK2, TIAM2, CNTN1, NUMB, UNC5D, SLIT2, ADAMTSL1, HECW1, MACF1, TRIO, CCDC141, CNTN4, PLS1, SLIT3, ROBO1, PAK3, CHODL, DSCAM, EPHA6, NTN1, IGF1R, NLGN1, MAP2, FLRT2, PTPRO, COBL, CUX1, ANK3, TBCD, RELN, CDH4, TNF, CNTN6, APP, PAK1, LRRC4C, ALCAM, TIAM1, PHACTR1, DISC1, FYN, EPHA7, S100B, PCDH15, CNTN5, EPHB1, EXT1, EFNA5, TRPC5, PPFA2, MARK2, SEMA6D, NTNG1, RAPGEF2, PRKCQ, NRXN3, ATP8A2, UBE3A, AUTS2, EPHB2, PDLIM5, PRTG, CTNND2, NRP1, DAB1, SEMA3A, SEMA3E, DCLK1, CDH2, FSTL4, GLI3, DNM3, PLXNA2, PTPRD, ELAVL4, ABI1, DOCK10, TNN, SEMA3D, VCL, ROBO2, CDH23, SEMA5A, BCL11A, DCC, CTNNA2, CHN1, PARD3, SEMA3C                                                                                                                                |
| GO:0099537 | trans-synaptic signaling                              | 5.649611262235817e-21  | SYN3, PRKCB, CD38, GRIK2, IGSF11, UNC13B, CDH8, APBA2, DLGAP1, JAK2, FGF12, CACNG2, BTBD9, CDH11, GRIN2A, NRXN1, IL1RAPL1, GRID1, RPS6KA2, AMPH, EXOC4, NTRK2, NRG3, GRIK3, CACNB2, SHANK2, GABRA5, CHRM3, DTNA, RAP1A, NOS1, HTR2C, CACNA1E, CNTN4, GABRR2, GRIK4, GABRG1, SV2B, P2RX6, SLC1A2, GRIN2B, DGKB, GABRA2, FCHSD2, PRKCE, PTPRN2, GRIK1, DGKI, SLC1A1, GRM5, NLGN1, SHISA9, SV2C, RELN, RASGRF2, TNF, CELF4, APP, HCN1, CHRM5, RASGRF1, LRRC4C, PPP1R9A, ZZEF1, CLSTN2, SORCS2, DISC1, FYN, RIMBP2, GRIA1, S100B, GABRG3, GRM1, ERC2, RIMS1, MCTP2, EPHB1, SNAP29, EXT1, PLCB4, SORCS3, GRID2, NTF3, NTNG1, TMEM108, GABRB3, GRM7, RAPGEF2, GABRG2, NRXN3, NSG1, GABBR2, KCND2, EPHB2, ERC1, MCTP1, PACSIN2, CDH2, GABRB1, CADPS, LRFN2, SLC24A2, SYT1, DLG2, PTPRD, SHISA6, PLCB1, ELAVL4, PLCL1, TSHZ3, ASIC2, CACNG3, PTPRA, MTMR2, UNC13C, RIMS2, DLGAP2, DCC |
| GO:0007268 | chemical synaptic transmission                        | 2.4160510443437632e-20 | SYN3, PRKCB, CD38, GRIK2, IGSF11, UNC13B, CDH8, APBA2, DLGAP1, JAK2, FGF12, CACNG2, BTBD9, CDH11, GRIN2A, NRXN1, GRID1, RPS6KA2, AMPH, EXOC4, NTRK2, NRG3, GRIK3, CACNB2, SHANK2, GABRA5, CHRM3, DTNA, RAP1A, HTR2C, CACNA1E, CNTN4, GABRR2, GRIK4, GABRG1, SV2B, P2RX6, SLC1A2, GRIN2B, DGKB, GABRA2, FCHSD2, PRKCE, PTPRN2, GRIK1, DGKI, SLC1A1, GRM5, NLGN1, SHISA9, SV2C, RELN, RASGRF2, TNF, CELF4, APP, HCN1, CHRM5, RASGRF1, LRRC4C, PPP1R9A, ZZEF1, CLSTN2, SORCS2, DISC1, FYN, RIMBP2, GRIA1, S100B, GABRG3, GRM1, ERC2, RIMS1, MCTP2, EPHB1, SNAP29, EXT1, PLCB4, SORCS3, GRID2, NTF3, NTNG1, TMEM108, GABRB3, GRM7, RAPGEF2, GABRG2, NRXN3, NSG1, GABBR2, KCND2, EPHB2, ERC1, MCTP1, PACSIN2, CDH2, GABRB1, CADPS, LRFN2, SLC24A2, SYT1, DLG2, PTPRD, SHISA6, PLCB1, ELAVL4, PLCL1, TSHZ3, ASIC2, CACNG3, PTPRA, MTMR2, UNC13C, RIMS2, DLGAP2, DCC                 |
| GO:0098916 | anterograde trans-synaptic signaling                  | 2.4160510443437632e-20 | SYN3, PRKCB, CD38, GRIK2, IGSF11, UNC13B, CDH8, APBA2, DLGAP1, JAK2, FGF12, CACNG2, BTBD9, CDH11, GRIN2A, NRXN1, GRID1, RPS6KA2, AMPH, EXOC4, NTRK2, NRG3, GRIK3, CACNB2, SHANK2, GABRA5, CHRM3, DTNA, RAP1A, HTR2C, CACNA1E, CNTN4, GABRR2, GRIK4, GABRG1, SV2B, P2RX6, SLC1A2, GRIN2B, DGKB, GABRA2, FCHSD2, PRKCE, PTPRN2, GRIK1, DGKI, SLC1A1, GRM5, NLGN1, SHISA9, SV2C, RELN, RASGRF2, TNF, CELF4, APP, HCN1, CHRM5, RASGRF1, LRRC4C, PPP1R9A, ZZEF1, CLSTN2, SORCS2, DISC1, FYN, RIMBP2, GRIA1, S100B, GABRG3, GRM1, ERC2, RIMS1, MCTP2, EPHB1, SNAP29, EXT1, PLCB4, SORCS3, GRID2, NTF3, NTNG1, TMEM108, GABRB3, GRM7, RAPGEF2, GABRG2, NRXN3, NSG1, GABBR2, KCND2, EPHB2, ERC1, MCTP1, PACSIN2, CDH2, GABRB1, CADPS, LRFN2, SLC24A2, SYT1, DLG2, PTPRD, SHISA6, PLCB1, ELAVL4, PLCL1, TSHZ3, ASIC2, CACNG3, PTPRA, MTMR2, UNC13C, RIMS2, DLGAP2, DCC                 |
| GO:0099536 | synaptic                                              | 2.934312467524761e-20  | SYN3, PRKCB, CD38, GRIK2, IGSF11, UNC13B, CDH8, APBA2, DLGAP1, JAK2, FGF12, CACNG2, BTBD9, CDH11, GRIN2A, NRXN1, IL1RAPL1, GRID1, RPS6KA2, AMPH, EXOC4, NTRK2, NRG3, GRIK3, CACNB2, SHANK2, GABRA5, CHRM3, DTNA, RAP1A, HTR2C, CACNA1E, CNTN4, GABRR2, GRIK4, GABRG1, SV2B, P2RX6, SLC1A2, GRIN2B, DGKB, GABRA2, FCHSD2, PRKCE, PTPRN2, GRIK1, DGKI, SLC1A1, GRM5, NLGN1, SHISA9, SV2C, RELN, RASGRF2, TNF, CELF4, APP, HCN1, CHRM5, RASGRF1, LRRC4C, PPP1R9A, ZZEF1, CLSTN2, SORCS2, DISC1, FYN, RIMBP2, GRIA1, S100B, GABRG3, GRM1, ERC2, RIMS1, MCTP2, EPHB1, SNAP29, EXT1, PLCB4, SORCS3, GRID2, NTF3, NTNG1, TMEM108, GABRB3, GRM7, RAPGEF2, GABRG2, NRXN3, NSG1, GABBR2, KCND2, EPHB2, ERC1, MCTP1, PACSIN2, CDH2, GABRB1, CADPS, LRFN2, SLC24A2, SYT1, DLG2, PTPRD, SHISA6, PLCB1, ELAVL4, PLCL1, TSHZ3, ASIC2, CACNG3, PTPRA, MTMR2, UNC13C, RIMS2, DLGAP2, DCC       |

|            |               |                        |                                                                                                                                                                                                                                                                                                                                                                                                                                                                                                                                                                                                                                                                                                                                                                                                                                                                                                                                                                                                                                                                                                                                                                                                                                                                                                                                                                                                                                                                                                                                                                                                                                                                                                                                                                                                                                                                                                                                                                             |
|------------|---------------|------------------------|-----------------------------------------------------------------------------------------------------------------------------------------------------------------------------------------------------------------------------------------------------------------------------------------------------------------------------------------------------------------------------------------------------------------------------------------------------------------------------------------------------------------------------------------------------------------------------------------------------------------------------------------------------------------------------------------------------------------------------------------------------------------------------------------------------------------------------------------------------------------------------------------------------------------------------------------------------------------------------------------------------------------------------------------------------------------------------------------------------------------------------------------------------------------------------------------------------------------------------------------------------------------------------------------------------------------------------------------------------------------------------------------------------------------------------------------------------------------------------------------------------------------------------------------------------------------------------------------------------------------------------------------------------------------------------------------------------------------------------------------------------------------------------------------------------------------------------------------------------------------------------------------------------------------------------------------------------------------------------|
|            | signaling     |                        | K2, GABRA5, CHRM3, DTNA, RAP1A, NOS1, HTR2C, CACNA1E, CNTN4, GABRR2, GRIK4, GABRG1, SV2B, P2RX6, SLC1A2, GRIN2B, DGKB, GABRA2, FCHSD2, PRKCE, PTPRN2, GRIK1, DGKI, SLC1A1, GRM5, NLGN1, SHISA9, SV2C, RELN, RASGRF2, TNFR, CELF4, APP, HCN1, CHRM5, RASGRF1, LRRC4C, PPP1R9A, ZZEF1, CLSTN2, SORCS2, DISC1, FYN, RIMBP2, GRIA1, S100B, GABRG3, GRM1, ERC2, RIMS1, MCTP2, EPHB1, SNAP29, EXT1, PLCB4, SORCS3, GRID2, NTF3, NTNG1, TMEM108, GABRB3, GRM7, RAPGEF2, GABRG2, NRXN3, NSG1, GABBR2, KCND2, EPHB2, ERCC1, MCTP1, PACSIN2, CDH2, GABRB1, CADPS, LRFN2, SLC24A2, SYT1, DLG2, PTPRD, SHISA6, PLCB1, ELAVL4, PLCL1, TSHZ3, ASIC2, CACNG3, PTPRA, MTMR2, UNC13C, RIMS2, DLGAP2, DCC, NRG1                                                                                                                                                                                                                                                                                                                                                                                                                                                                                                                                                                                                                                                                                                                                                                                                                                                                                                                                                                                                                                                                                                                                                                                                                                                                               |
| GO:0007155 | cell adhesion | 1.9948467750521133e-19 | CD44, SEMA4D, BCL2, COL18A1, RAG1, IGSF11, NCAM1, CDH8, ASTN2, NTN4, JAK2, TM9SF4, USH2A, NEGR1, NFAT5, MEGF11, LAMA1, PARVB, CDH11, NRXN1, ARID1B, IL1RAPL1, WPCP, MAGI1, LAMA3, CTNNA1, ITGBL1, NCAM2, SMARCA4, CNTN1, PDZD2, VCAN, CNTNAP5, UNC5D, DLG5, CFDP1, PGM5, ASTN1, ATRNL1, ADAMTSL1, CRB1, KANK1, LPP, MACF1, DUSP22, ABL2, CCDC141, CNTN4, MUC16, HMCN1, ITGA1, CORO2B, ITGA8, RUNX1, CDH17, PEAK1, CDH18, SPON1, ZBTB16, ROBO1, EGFLAM, IGSF5, ITGB3BP, PRKCE, CNTN3, EDIL3, DSCAM, SDK1, NTN1, NLGN1, JAM2, CNTNAP2, FLRT2, PTPRO, PCDH9, CD96, CTNNA1, ITGA9, ANK3, CDH12, TBCD, GPC6, RELN, CDH4, TNFR, VAV3, CNTN6, APP, FBLN5, SPOCK1, ADAM12, CXADR, LRFN5, UTRN, TENM4, RIN2, FRMD5, PCDH7, LRRC4C, ALCAM, SLAMF1, CLSTN2, TIAM1, DISC1, FMN1, SVEP1, NTM, FYN, EPHA7, COL19A1, PCDH15, CNTN5, PCDH11X, EPHB1, LSAMP, AJAP1, IGSF21, DOCK1, TRPM7, EXT1, EFNA5, TLN2, PPFIA2, TENM3, OPCML, GRID2, FER, NTNG1, SLC39A8, PRKCQ, SSPN, KIIRREL3, NRXN3, DLC1, APC, EPHB2, PDLIM5, PRTG, ADAMTS18, RGM, CTNND2, PKP1, NRP1, CDH13, DAB1, SEMA3E, CADM2, CDH2, TENM2, FBLN1, CD2AP, ADAM10, PTPRT, GLI3, FBN1, CTNNA3, PTPRK, NPHP4, DLG2, PPARA, PLXNA2, PTPRD, LOXL2, PRKG1, RASGRP1, CDH9, STXB P6, CNTNAP3, FNDC3A, ETS1, TNN, PRLR, PTPRA, FAT3, VCL, ROBO2, CDH23, NEDD9, SEMA5A, FREM1, DCC, CTNNA2, PARD3B, PARD3, NRG1, PRKCA                                                                                                                                                                                                                                                                                                                                                                                                                                                                                                                                                                                                                    |
| GO:0023052 | signaling     | 6.7218962948901985e-19 | CD44, APBB2, PTPRR, ERG, PDE1C, SEMA4D, INIP, EVC, TEAD1, SYN3, RPS6KA5, TAOK3, PRKCB, SLC8A1, ANKRD6, GPR55, CD38, FBXO31, BCL2, CAMTA1, CHFR, THRB, CDC42EP3, GRIK2, IGSF11, SNX25, UNC13B, MAPK10, NCAM1, GNG12, IL6R, CDH8, SCN11A, SORBS2, SKAP2, CASP5, KCNK10, BRD4, GPR158, NDRG2, GRIP1, APBA2, TLK1, DLGAP1, RCAN1, NTN4, JAK2, BICD1, ABCG8, OTUD7A, TPTE2, KALRN, FGF12, CACNG2, BTBD9, NFAT5, TRHDE, ZNF536, LAMA1, CDH11, GRIN2A, MAST4, NRXN1, IL1RAPL1, WPCP, MAGI1, LAMA3, ADCYAP1R1, GRID1, RPS6KA2, SMOC2, ZDHHC17, KCNH1, DCDL1, CACNA1C, AMPH, BMF, EXOC4, FAM83B, CTNNA1, MYO9A, NTRK2, FOXN3, NLK, ITGBL1, RASGEF1B, AFAP1, TIAM2, IQCJ-SCHIP1, SMARCA4, RNF152, CNTN1, ZNRF3, ENPEP, NRG3, PTPRG, MC2R, BTBD11, ELMO1, SLC24A4, CABIN1, FBXL17, GAS2, GRIK3, CACNB2, PDE10A, STXBP4, MECOM, STK32B, RGS12, SHANK2, RAPGEF5, KCTD8, UNC5D, NREP, GABRA5, DOK5, DLG5, ATRNL1, CHRM3, CPE, ARHGAP24, SPRED2, IGHV10R15-9, SLIT2, PITPNC1, ROR1, GLP2R, ZNF675, CSNK2A1, DTNA, AKT3, CRRB1, KCNE4, TRIM5, PSD3, ALPK2, HECW1, RAP1GDS1, ERBB4, KANK1, ATRX, DMRT1, BID, MACF1, RAP1A, TRIO, PTPRE, DUSP22, CHSY1, M YOM1, PSG8, EXT2, OR4C46, ABL2, MAP3K5, NOS1, RGS3, AMPL2, RERG, HTR2C, CACNA1E, CNTN4, GABRR2, PIK3C3, TRAF3, FGD4, ITGA1, ITGA8, GRIK4, ALDH1A2, GABRG1, MAPK9, ESRRG, PTGFR, IGHV10R21-1, CDH17, SV2B, EYA1, ANKS1B, P2RX6, AKAP10, ANK2, PLA2G4A, SLC1A2, SLIT3, GRIN2B, ROBO1, PAK3, DGKB, GARNL3, TNKS, NDFIP2, GABRA2, OVOL2, FCHSD2, SGMS1, ITPR2, MLLT3, LEMD3, RNF138, PRICKLE2, ITGB3BP, DGKK, PRKCE, PSG9, ARHGEF11, PRKAA2, BBS2, IL1RAPL2, PTPRN2, GRIK1, DSCAM, DGKI, RIN3, DNMBP, EFHB, KDM4C, SLC1A1, GRM5, EPHA6, NTN1, ARAP2, NR5A2, IGF1R, NLGN1, SHISA9, OR9Q1, CORIN, CNTNAP2, CFTR, FLRT2, NOS1AP, PTPRO, RBMS3, INSR, CTNNA1, CLEC16A, ITGA9, ANK3, SV2C, GMD5, CNIH3, DOCK3, GPC6, RELN, RASGRF2, STK38, TNFR, ADCY9, CELF4, DAPK1, VAV3, INPP5A, VRK1, CNTN6, APP, PUM1, CCDC88A, PLCE1, ADAM12, PAK1, GN |

|            |                    |                        |                                                                                                                                                                                                                                                                                                                                                                                                                                                                                                                                                                                                                                                                                                                                                                                                                                                                                                                                                                                                                                                                                                                                                                                                                                                                                                                                                                                                                                                                                                                                                                                                                                                                                                                                                                                                                                                                                                                                                                                                                                                                                                                        |
|------------|--------------------|------------------------|------------------------------------------------------------------------------------------------------------------------------------------------------------------------------------------------------------------------------------------------------------------------------------------------------------------------------------------------------------------------------------------------------------------------------------------------------------------------------------------------------------------------------------------------------------------------------------------------------------------------------------------------------------------------------------------------------------------------------------------------------------------------------------------------------------------------------------------------------------------------------------------------------------------------------------------------------------------------------------------------------------------------------------------------------------------------------------------------------------------------------------------------------------------------------------------------------------------------------------------------------------------------------------------------------------------------------------------------------------------------------------------------------------------------------------------------------------------------------------------------------------------------------------------------------------------------------------------------------------------------------------------------------------------------------------------------------------------------------------------------------------------------------------------------------------------------------------------------------------------------------------------------------------------------------------------------------------------------------------------------------------------------------------------------------------------------------------------------------------------------|
|            |                    |                        | <p>AL, MITF, CACNA2D1, HCN1, PPP1R13B, CHRM5, CXADR, EPS8, GPC5, TENM4, GHR, RASGRF1, RIN2, PRDM16, USP7, KIR2DL4, STARD13, KL, LRRC4C, ALCAM, PPP1R9A, TMEM117, ZZEF1, LTBP1, SLAMF1, RGL1, CLSTN2, RARB, DIDO1, WDR12, TIAM1, SORCS2, SLC39A12, DISC1, RALGPS1, ARHGAP42, SVEP1, EDAR, EGF, PDGFD, FYN, FAM3B, KCND3, RIMBP2, EPHA7, FHIT, NSG2, GRIA1, TRABD2B, STK3, CNOT7, USP18, S100B, NET1, ESR1, ARHGAP12, GABRG3, PLCXD3, GRM1, PDE4D, ER2, PRKACB, GNG2, PDE3A, RIMS1, POR, DOCK4, MCTP2, WWOX, HUNK, CNKSR2, FUT8, EPHB1, CREM, EFEMP1, ABCC9, SNAP29, GSG1L, DOCK1, FLT1, EXT1, EFNA5, NXN, CDC14B, HDAC4, STK36, AMFR, PLCB4, SH3BP5, AKAP6, SORCS3, TENM3, MARK2, ATF2, RBBP8, GRID2, ZNF423, LRP2, SEMA6D, RALGPS2, NTF3, FER, SNRK, CAMK4, NTNG1, MAPRE2, SGCD, TMEM108, RIC8B, GABRB3, TPTE, GRM7, RAPGEF2, MX1, PRKCQ, GABRG2, PRKCH, NRXN3, RHPN2, DLC1, NSG1, GABBR2, KCND2, UBE3A, GRIA4, IDE, APC, AUTS2, TFF1, EPHB2, ERC1, AGO3, MCTP1, MBO3B, NBN, ADAMTS18, RGMB, CTNND2, PACSIN2, PKP1, DOCK2, NRP1, CDH13, TRDN, DAB1, RFTN1, ALK, EVC2, LDLRAD4, SEMA3A, SEMA3E, MGAT5, DCLK1, MAGI3, KIF16B, CDH2, ARID5B, SIPA1L2, RCAN2, LRRC69, TENM2, ASB3, PIK3R3, MAP2K6, FSTL4, ARHGAP28, MTOR, STK38L, KSR1, RALGAP2, RORB, GABRB1, FBLN1, BLM, SH3KBP1, FHL2, CADPS, NEU3, NCAPG2, RGS7, STK32A, CD2AP, SPRED1, SIPA1L3, ADAM10, LRFN2, FLNB, SCAI, PTPRT, TRERF1, SLC24A2, GLI3, NTRK3, RXFP1, FBN1, CTNNA3, RAPGEF4, BMPER, PDE1A, HMG2, NSUN2, DEFA3, PTPRK, SORCS1, SYT1, APIP, NPHP4, DOCK9, DLG2, PPP1R12B, PPARA, PLXNA2, PTPRD, RORA, SHISA6, PLCB1, PRKG1, RASGRP1, ELAVL4, NLRC5, MAGI2, PLCL1, ABI1, TSHZ3, ASIC2, RALA, DOCK10, TRPM1, CACNG3, PRKD1, BCL2L1, HDAC2, TNN, RYR2, SEMA3D, TGFA, PRLR, TBX20, PTPRA, OR11G2, MTMR2, ATF6, IL16, DEPTOR, ROBO2, IFT81, ZMYND11, RGS6, SRGAP3, AKAP13, NEDD9, MYRIP, ENPP1, UNC13C, PCP4, RIMS2, STAC, SCN8A, EYA4, RALGAP1, DLGAP2, SEMA5A, PRDM15, OR4N2, DCC, CHN1, PARD3, NRG1, PRKCA, FMN2, SEMA3C, CSF2RB, PCNT, ST18</p>                                                                                                         |
| GO:0007154 | cell communication | 1.0466865133937966e-18 | <p>CD44, APBB2, PTPRR, ERG, PDE1C, SEMA4D, INIP, ZFYVE1, EVC, TEAD1, SYN3, RPS6KA5, TAOK3, PRKCB, SLC8A1, ANKRD6, GPR55, DNAJC15, CD38, FBXO31, BCL2, CAMTA1, CHFR, THRB, CDC42EP3, GRIK2, IGSF11, SNX25, UNC13B, MAPK10, NCAM1, GNG12, IL6R, CDH8, SCN11A, SORBS2, SKAP2, CASP5, KCNK10, BRD4, GPR158, NDRG2, GRIP1, APBA2, TLK1, DLGAP1, RCAN1, NTN4, JAK2, BICD1, ABCG8, OTUD7A, TPTE2, KALRN, FGF12, CACNG2, BTBD9, NFAT5, TRHDE, ZNF536, LAMA1, CDH11, GRIN2A, MAST4, NRXN1, IL1RAPL1, WDCP, MAGI1, LAMA3, ADCYAP1R1, GRID1, RPS6KA2, SMOC2, ZDHHC17, KCNH1, CDC1, CACNA1C, AMPH, BMF, EXOC4, FAM83B, CTNNA1, MYO9A, NTRK2, FOXN3, NLK, ITGBL1, RASGEF1B, AFAP1, TIAM2, IQCJ-SCHIP1, SMARCA4, RNF152, CNTN1, ZNRF3, ENPEP, NRG3, PTPRG, MC2R, BTBD11, ELMO1, SLC24A4, CABIN1, FBXL17, GAS2, GRIK3, CACNB2, PDE10A, STXBP4, MECOM, STK32B, RGS12, SHANK2, RAPGEF5, KCTD8, UNC5D, NREP, GABRA5, DOK5, DLG5, ATRNL1, CHRM3, CPE, ARHGAP24, SPRED2, IGHV1OR15-9, SLIT2, PITPNC1, ROR1, GLP2R, ZNF675, CSNK2A1, DTNA, AKT3, CRRB1, TRIM5, PSD3, ALPK2, HECW1, RAP1GDS1, ERBB4, KANK1, ATRX, DMRT1, BID, MACF1, RAP1A, TRIO, PTPRE, DUSP22, CHSY1, MYOM1, PSG8, EXT2, OR4C46, ABL2, MAP3K5, NOS1, RGS3, MAML2, RERG, HTR2C, CACNA1E, CNTN4, GABRR2, PIK3C3, TRAF3, FGD4, ITGA1, ITGA8, GRIK4, ALDH1A2, GABRG1, MAPK9, ESRRG, PTGFR, IGHV1OR21-1, CDH17, SV2B, EYA1, ANKS1B, P2RX6, AKAP10, ANK2, PLA2G4A, SLC1A2, SLIT3, GRIN2B, ROBO1, PAK3, DGKB, GARNL3, TNKS, NDFIP2, GABRA2, OVOL2, FCHSD2, SGMS1, ITPR2, MLLT3, LEMD3, RNF138, PRICKLE2, ITGB3BP, DGKK, PRKCE, PSG9, ARHGEF11, PRKAA2, BBS2, IL1RAPL2, PTPRN2, GRIK1, DSCAM, DGKI, RIN3, DNMBP, EFHB, KDM4C, SLC1A1, GRM5, EPHA6, NTN1, ARAP2, NR5A2, IGF1R, NLGN1, SHISA9, OR9Q1, CNTNAP2, CFTR, FLRT2, NOS1AP, PTPRO, RBMS3, INSR, CTNNAL1, CLEC16A, ITGA9, ANK3, SV2C, GMDS, CNIH3, DOCK3, GPC6, RELN, RASGRF2, STK38, TNFR, ADCY9, CELF4, DAPK1, VAV3, INPP5A, VRK1, CNTN6, APP, PUM1, CCDC88A, PLCE1, ADAM12, PAK1, GNAL, MITF, CACNA2D1, HCN1, PPP1R13B, CHRM5, CXADR, EPS8, GPC5, TENM4, GHR, RASGRF1, RIN2, PRDM16, USP7, KIR2DL4, STARD13, KL, LRRC4</p> |

|            |                                               |                        |                                                                                                                                                                                                                                                                                                                                                                                                                                                                                                                                                                                                                                                                                                                                                                                                                                                                                                                                                                                                                                                                                                                                                                                                                                                                                                                                                                                                                                                                                                                                                                                                                                     |
|------------|-----------------------------------------------|------------------------|-------------------------------------------------------------------------------------------------------------------------------------------------------------------------------------------------------------------------------------------------------------------------------------------------------------------------------------------------------------------------------------------------------------------------------------------------------------------------------------------------------------------------------------------------------------------------------------------------------------------------------------------------------------------------------------------------------------------------------------------------------------------------------------------------------------------------------------------------------------------------------------------------------------------------------------------------------------------------------------------------------------------------------------------------------------------------------------------------------------------------------------------------------------------------------------------------------------------------------------------------------------------------------------------------------------------------------------------------------------------------------------------------------------------------------------------------------------------------------------------------------------------------------------------------------------------------------------------------------------------------------------|
|            |                                               |                        | <p>C,ALCAM,PPP1R9A,TMEM117,ZZEF1,LTBP1,SLAMF1,RGL1,CLSTN2,RARB,DIDO1,MYH13,WDR12,TIAM1,SORCS2,SLC39A12,DISC1,RALGPS1,ARHGAP42,SVEP1,EDAR,EGF,PDGFD,FYN,FAM3B,RIMBP2,EPHA7,FHIT,NSG2,GRIA1,TRABD2B,STK3,CNOT7,USP18,S100B,NET1,ESR1,ARHGAP12,GABRG3,PLCXD3,GRM1,PDE4D,ERC2,PRKACB,GNG2,PDE3A,RIMS1,POR,DOCK4,MCTP2,WWOX,HUNK,CNKSR2,FUT8,EPHB1,CREM,EFEMP1,SNAP29,GSG1L,DOCK1,FLT1,EXT1,EFNA5,NXN,CDC14B,HDAC4,STK36,AMFR,PLCB4,SH3BP5,AKAP6,SORCS3,TENM3,MARK2,ATF2,RBBP8,GRID2,ZNF423,LRP2,SEMA6D,RALGPS2,NTF3,FER,SNRK,CAMK4,NTNG1,MAPRE2,SGCD,TMEM108,RIC8B,GABRB3,TPTE,GRM7,RAPGEF2,MX1,PRKCQ,GABRG2,PRKCH,NRXN3,RHPN2,DLC1,NSG1,GABBR2,KCND2,UBE3A,GRIA4,IDE,APC,AUTS2,TFF1,EPHB2,ERC1,AGO3,MCTP1,MOB3B,NBN,ADAMTS18,RGMB,CTNND2,PACSIN2,PKP1,DOCK2,NRP1,CDH13,TRDN,DAB1,RFTN1,SNTG1,ALK,EVC2,LDLRAD4,SEMA3A,SEMA3E,MGAT5,DCLK1,MAGI3,KIF16B,CDH2,ARID5B,SIPA1L2,RCAN2,LRRCC69,TENM2,VPS41,ASB3,PIK3R3,MAP2K6,FSTL4,ARHGAP28,MTOR,STK38L,KSRL,RALGAPA2,RORB,GABRB1,FBLN1,BLM,SH3KBP1,FHL2,CADPS,NEU3,NCAPG2,RGS7,STK32A,CD2AP,SPRED1,SIPA1L3,ADAM10,LRFN2,FLNB,SCAI,PTPRT,TRERF1,SLC24A2,GLI3,NTRK3,RXFP1,FBN1,CHKA,CTNNA3,RAPGEF4,BMPER,PDE1A,HMGA2,NSUN2,DEFA3,PTPRK,SORCS1,SYT1,APIP,NPHP4,DOCK9,DLG2,PPP1R12B,PPARA,PLXNA2,PTPRD,RORA,SHISA6,PLCB1,PRKG1,RASGRP1,ELAVL4,NLRC5,MAGI2,PLCL1,ABI1,TSHZ3,ASIC2,RALA,DOCK10,TRPM1,CACNG3,PRKD1,BCL2L1,HDAC2,TNN,RYR2,SEMA3D,TGFA,PRLR,TBX20,PTPRA,OR11G2,MTMR2,ATF6,IL16,DEPTOR,ROBO2,IFT81,ZMYND11,RGS6,SRGAP3,AKAP13,NEDD9,MYRIP,ENPP1,UNC13C,PCP4,RIMS2,STAC,SCN8A,EYA4,RALGAPA1,DLGAP2,SEMA5A,PRDM15,OR4N2,FREM1,DCC,CHN1,PARD3,NRG1,PRKCA,FMN2,SEMA3C,CSF2RB,PCNT,ST18</p> |
| GO:0010975 | regulation of neuron projection development   | 5.179767157491692e-18  | <p>SEMA4D,CD38,FBXO31,TANC2,CSMD3,KALRN,NEGR1,NRXN1,IL1RAPL1,NTRK2,TIAM2,CNTN1,PTPRG,SLIT2,ROR1,HECW1,KANK1,MACF1,RAP1A,ABL2,ROBO1,PAK3,CHODL,DSCAM,NTN1,IGF1R,NLGN1,MAP2,CAMK1D,PTPRO,COBL,CUX1,RELN,CDH4,TNR,CCDC88A,SPOCK1,PAK1,LRRCC4C,TIAM1,SLC39A12,DISC1,FYN,EPHA7,TOX,EFNA5,TRPC5,PPFIA2,TENM3,MARK2,GRID2,SEMA6D,NTNG1,RAPGEF2,ATP8A2,UBE3A,EPHB2,PDLIM5,NRP1,DAB1,ALK,SEMA3A,SEMA3E,CDH2,FSTL4,NTRK3,DNM3,PLXNA2,PTPRD,ELAVL4,MAGI2,PRKD1,HDAC2,TNN,SEMA3D,FAT3,ROBO2,SEMA5A,BCL11A,DCC,CTNNA2,CHN1,SEMA3C</p>                                                                                                                                                                                                                                                                                                                                                                                                                                                                                                                                                                                                                                                                                                                                                                                                                                                                                                                                                                                                                                                                                                            |
| GO:0051128 | regulation of cellular component organization | 6.7880480348993945e-18 | <p>CD44,C10ORF90,SCAF8,PARN,SEMA4D,TEAD1,DNAJC15,CD38,FBXO31,BCL2,CHFR,CDC42EP3,UNC13B,CDH8,ATP10A,GRIP1,TLK1,TANC2,CSMD3,BICD1,KALRN,NEGR1,BTBD9,EPB41L3,LAMA1,NRXN1,ARID1B,IL1RAPL1,WDPCP,CTDP1,RPS6KA2,BMF,MYO9A,NTRK2,OCNL,AFAP1,TIAM2,IQCF-SCHIP1,SMARCA4,CNTN1,NRG3,PTPRG,NUMB,MTPN,PDE4DIP,SHANK2,DLG5,ARHGAP24,SLIT2,MYLK3,ROR1,CSNK2A1,ABCA13,HECW1,RAP1GDS1,KANK1,ATRX,DMRT1,BID,MACF1,MNAT1,RAP1A,DUSP22,ABL2,REGR,TBC1D5,CORO2B,RUNX1,MAPK9,CDH17,PEAK1,PLS1,SLIT3,GRIN2B,ROBO1,PAK3,DGKB,TNKS,MDM1,FCHSD2,MLLT3,CHODL,TMEM67,PRKCE,ARHGEF11,PRKAA2,IL1RAPL2,DSCAM,RIN3,NTN1,IGF1R,SPTB,SNX30,NLGN1,CNTNAP2,MAP2,CAMK1D,FLRT2,PTPRO,INSR,COBL,CLEC16A,MTRF1,CUX1,MORC2,TBCD,GPC6,RELN,CDH4,TNR,APP,FBLN5,CCDC88A,SPOCK1,PLCE1,PAK1,ADCK1,NSMCE2,EPS8,LRFN5,USP7,LRRCC4C,ADAMTS16,SLAMF1,INO80D,CLSTN2,TIAM1,SLC39A12,DISC1,FMN1,ASAP1,FRMPD4,EGF,FYN,EPHA7,TRABD2B,SPIDR,NET1,TOX,ESR1,PDE3A,RIMS1,EPHB1,CTTNBP2,FHOD3,GSG1L,EFNA5,HDAC4,TRPC5,PPFIA2,AKAP6,TENM3,LINGO2,MARK2,GRID2,SEMA6D,NTF3,FER,NTNG1,MAPRE2,RAD51AP1,RAPGEF2,NAV3,PRKCQ,PRKCH,RHPN2,DLC1,ATP8A2,UBE3A,APC,INO80,AUTS2,EPHB2,SCAF4,PDLIM5,MCTP1,NBN,PACSIN2,SDCCAG8,NRP1,CDH13,DAB1,ALK,LDLRAD4,SEMA3A,SEMA3E,CDH2,TENM2,TANC1,VPS41,FSTL4,ARHGAP28,MTOR,STK38L,NEU3,CD2AP,ADAM10,LRFN2,PAPPA2,NTRK3,RAB31,VPS1</p>                                                                                                                                                                                                                                                                                                                                |

|            |                                            |                        |                                                                                                                                                                                                                                                                                                                                                                                                                                                                                                                                                                                                                                                                                                                                                                                                                                                                                                                                                                                                                                                                                                                                                                                                                                                                                                                                                                                                                                                                                                                                                                                                                                                                                                                                                                                                                                                                                                                                                                                                                                                                                                                                                                                                                                                                                                                                                                                                                                                                                                                                                                                                                                                                                                                                                                                                    |
|------------|--------------------------------------------|------------------------|----------------------------------------------------------------------------------------------------------------------------------------------------------------------------------------------------------------------------------------------------------------------------------------------------------------------------------------------------------------------------------------------------------------------------------------------------------------------------------------------------------------------------------------------------------------------------------------------------------------------------------------------------------------------------------------------------------------------------------------------------------------------------------------------------------------------------------------------------------------------------------------------------------------------------------------------------------------------------------------------------------------------------------------------------------------------------------------------------------------------------------------------------------------------------------------------------------------------------------------------------------------------------------------------------------------------------------------------------------------------------------------------------------------------------------------------------------------------------------------------------------------------------------------------------------------------------------------------------------------------------------------------------------------------------------------------------------------------------------------------------------------------------------------------------------------------------------------------------------------------------------------------------------------------------------------------------------------------------------------------------------------------------------------------------------------------------------------------------------------------------------------------------------------------------------------------------------------------------------------------------------------------------------------------------------------------------------------------------------------------------------------------------------------------------------------------------------------------------------------------------------------------------------------------------------------------------------------------------------------------------------------------------------------------------------------------------------------------------------------------------------------------------------------------------|
|            |                                            |                        | 3D, ABHD17C, ATF7IP, TBC1D4, DNM3, SYT1, SYNDIG1, DPF3, NPHP4, SACS, PPARA, PLXNA2, PTPRD, PLCB1, ELAVL4, STXB6, MAGI2, ASIC2, RALA, PRKD1, ATP8A1, BCL2L1, HDAC2, TNN, SEMA3D, TGFA, TBX20, PTPRA, FAT3, MTMR2, VCL, ATAT1, ROBO2, AKAP13, NEDD9, ENPP1, RIMS2, L3MBTL3, CLIP1, SEMA5A, BCL11A, DCC, CTNNA2, CHN1, VPS13C, NRG1, SEMA3C                                                                                                                                                                                                                                                                                                                                                                                                                                                                                                                                                                                                                                                                                                                                                                                                                                                                                                                                                                                                                                                                                                                                                                                                                                                                                                                                                                                                                                                                                                                                                                                                                                                                                                                                                                                                                                                                                                                                                                                                                                                                                                                                                                                                                                                                                                                                                                                                                                                           |
| GO:0031344 | regulation of cell projection organization | 1.0089153924858561e-17 | CD44, SEMA4D, CD38, FBXO31, CDC42EP3, GRIP1, TANC2, CSMD3, KALRN, NEGR1, NRXN1, IL1RAPL1, WPCP, MYO9A, NTRK2, OCLN, TIAM2, CNTN1, PTPRG, ARHGAP24, SLIT2, ROR1, HECW1, KANK1, MACF1, RAP1A, ABL2, PLS1, GRIN2B, ROBO1, PAK3, CHODL, DSCAM, NTN1, IGF1R, NLGN1, MAP2, CAMK1D, PTPRO, COBL, CUX1, RELN, CDH4, TNFR, CCD8A, SPOCK1, PLCE1, PAK1, EPS8, LRRC4C, ADAMTS16, TIAM1, SLC39A12, DISC1, FYN, EPHA7, TOX, EFNA5, HDAC4, TRPC5, PPFIA2, TENM3, MARK2, GRID2, SEMA6D, FER, NTNG1, RAPGEF2, ATP8A2, UBE3A, APC, AUTS2, EPHB2, PDLIM5, SDCCAG8, NRP1, DAB1, ALK, SEMA3A, SEMA3E, CDH2, TENM2, FSTL4, MTOR, NTRK3, DNM3, PLXNA2, PTPRD, ELAVL4, MAGI2, RALA, PRKD1, HDAC2, TNN, SEMA3D, FAT3, ROBO2, NEDD9, SEMA5A, BCL11A, DCC, CTNNA2, CHN1, SEMA3C                                                                                                                                                                                                                                                                                                                                                                                                                                                                                                                                                                                                                                                                                                                                                                                                                                                                                                                                                                                                                                                                                                                                                                                                                                                                                                                                                                                                                                                                                                                                                                                                                                                                                                                                                                                                                                                                                                                                                                                                                                              |
| GO:0048869 | cellular developmental process             | 1.5482827560464953e-17 | CD44, ZHX3, RTN1, ERG, SEMA4D, RPS6KA5, TAOK3, A2M, SLC8A1, GPB5, CD38, FBXO31, PIWIL3, TRAPPC9, BCL2, COL18A1, THRB, RAG1, NCAM1, IL6R, SORBS2, NDRG2, GRIP1, ASTN2, TANC2, CSMD3, RCAN1, NTN4, JAK2, KALRN, USH2A, NEGR1, FLI1, ZNF536, EPB41L3, LAMA1, PARVB, CDH11, ZBTB7C, GRIN2A, NRXN1, ARID1B, IL1RAPL1, WPCP, LAMA3, ADCYAP1R1, CTDP1, RPS6KA2, ZDHHC17, KCNH1, PNPLA3, BBS9, CTNNA1, MYO9A, NTRK2, THSD7A, NCAM2, TIAM2, MYT1L, SMARCA4, CNTN1, PLEKHB2, NRG3, PTPRG, SYNE1, FBXL17, NUMB, MTPN, SOX6, MECOM, VCAN, NHS, PTGFRN, UNC5D, NREP, GABRA5, DOK5, DLG5, PGM5, ASTN1, ATRNL1, ARHGAP24, SPRED2, SLIT2, MYLK3, ABCA5, ROR1, ADAMTSL1, KAZN, ZNF675, CRB1, ALPK2, HECW1, LCE1F, ERBB4, KANK1, ATRX, DMRT1, MACF1, TAF4B, RAP1A, TRIO, CHSY1, EXT2, ABL2, MAP3K5, NOS1, ABCG1, SPAG16, EML1, HTR2C, CCDC141, CNTN4, RNF17, SLC9C1, SND1, ETS2, ITGA1, TCF12, HIRA, ITGA8, RUNX1, ALDH1A2, MAPK9, CDH17, PEAK1, EYA1, FRMD6, PLS1, ANK2, ZBTB16, SLIT3, ROBO1, PAK3, OVOL2, BRINP1, MLLT3, CHODL, GABPA, GLIS1, PSG9, PACRG, BBS2, MYOM2, NUBPL, SOX5, DSCAM, KDM4C, SDK1, SLC1A1, GRM5, EPHA6, NTN1, NR5A2, IGF1R, NLGN1, SHROOM3, JAM2, MSI2, CNTNAP2, MAP2, CFTR, CAMK1D, FLRT2, PTPRO, NLSL1, COBL, CATSPER2, CRTAC1, CUX1, ANK3, TBCD, RELN, TRPS1, ADAMTS5, MYO18B, CDH4, TNFR, OCA2, CELF4, CNTN6, APP, PUM1, CCDC88A, SPOCK1, ADAM12, PAK1, MITF, HCN1, FRY, CXADR, TENM4, CECR2, GHR, RASGRF1, RIN2, PRDM16, RBFOX1, MEIS2, LRRC4C, ALCAM, PPP1R9A, SLAMF1, NEBL, RARB, TCF4, FRYL, TIAM1, PBX1, PHACTR1, SLC39A12, DISC1, ZFPM2, NTM, ASAP1, EDAR, FYN, EPHA7, NAV2, STK3, COL19A1, MSR1, S100B, TOX, PCDH15, ESR1, SGCZ, PDE4D, CNTN5, PDE3A, RIMS1, POR, CERS3, WWOX, EPHB1, CREM, FHOD3, EFEMP1, ARM2, JAP1, HERC1, DOCK1, FLT1, EXT1, EFNA5, NXN, C14ORF39, HDAC4, KLHL1, TRPC5, FTO, PPFIA2, AKAP6, POU6F2, TENM3, OPCML, MARK2, ATF2, GRID2, ZNF423, LRP2, SEMA6D, NTF3, FER, NRPK, CAMK4, NTN1, SGCD, TMEM108, GRM7, RAPGEF2, NAV3, PRKCQ, KIRREL3, CPS1, PRKCH, NRXN3, ATP8A2, UBE3A, APC, AUTS2, TFF1, EPHB2, PDLIM5, PRTG, CTNND2, COL22A1, SETD2, PACSIN2, DOCK2, SDCCAG8, FLVCR1, NRP1, MDGA2, RRGIP1, DAB1, ALK, LDLRAD4, SEMA3A, SEMA3E, MYEF2, DCLK1, CDH2, ARID5B, TENM2, TANC1, SYCP1, HDAC9, PIK3R3, MAP2K6, FSTL4, MTOR, RORB, GABRB1, FBLN1, FHL2, NCAPG2, SPRED1, SIPA1L3, FLNB, ABCB5, DPY19L2, GLI3, NTRK3, RXFP1, FBN1, HYDIN, TBX15, ZNF521, HMGA2, NSUN2, DNM3, SYT1, DPF3, NPHP4, PPARA, PLXNA2, PTPRD, RORA, PLCB1, LOXL2, PRKG1, RASGRP1, ELAVL4, DMBT1, MAGI2, NELL1, ABI1, DOCK10, FNDC3A, PRKD1, BCL2L1, HDAC2, ETS1, TNN, SEMA3D, PRLR, TBX20, FAT3, MTMR2, VCL, ATAT1, ROBO2, IFT81, CDH23, AKAP13, NEDD9, ENPP1, PCP4, RIMS2, RAB27A, EYA4, L3MBTL3, HIVEP3, SEMA5A, BCL11A, DCC, CTNNA2, CHN1, ETV6, PARD3, NRG1, PRKCA, FMN2, SEMA3C |
| GO:0120035 | regulation of                              | 1.6423465992151876e-17 | CD44, SEMA4D, CD38, FBXO31, CDC42EP3, TANC2, CSMD3, KALRN, NEGR1, NRXN1, IL1RAPL1, WPCP, NTRK2, OCLN, TIAM2, CNTN1, PTPRG, ARHGAP24, SLIT2, ROR1, HECW1, KANK1, MACF1, RAP1A, ABL2, PLS1, GRIN2B, ROBO1, PAK3, CHODL, DSCAM, NTN1, IGF1R, NLGN1, MAP2                                                                                                                                                                                                                                                                                                                                                                                                                                                                                                                                                                                                                                                                                                                                                                                                                                                                                                                                                                                                                                                                                                                                                                                                                                                                                                                                                                                                                                                                                                                                                                                                                                                                                                                                                                                                                                                                                                                                                                                                                                                                                                                                                                                                                                                                                                                                                                                                                                                                                                                                              |



|            |                                                    |                        |                                                                                                                                                                                                                                                                                                                                                                                                                                                                                                                                                                                                                                                                                                                                                                                                                                                                                                                                                                                                                                                 |
|------------|----------------------------------------------------|------------------------|-------------------------------------------------------------------------------------------------------------------------------------------------------------------------------------------------------------------------------------------------------------------------------------------------------------------------------------------------------------------------------------------------------------------------------------------------------------------------------------------------------------------------------------------------------------------------------------------------------------------------------------------------------------------------------------------------------------------------------------------------------------------------------------------------------------------------------------------------------------------------------------------------------------------------------------------------------------------------------------------------------------------------------------------------|
|            | plasma membrane bound cell projection organization |                        | ,CAMK1D,PTPRO,COBL,CUX1,RELN,CDH4,TNR,CCDC88A,SPOCK1,PLCE1,PAK1,EPS8,LRRRC4C,ADAMTS16,TIAM1,SLC39A12,DISC1,FYN,EPHA7,TOX,EFNA5,HDAC4,TRPC5,PPFIA2,TENM3,MARK2,GRID2,SEMA6D,FER,NTNG1,RAPGEF2,ATP8A2,UBE3A,APC,AUTS2,EPHB2,PDLIM5,SDCCAG8,NRP1,DAB1,ALK,SEMA3A,SEMA3E,CDH2,TENM2,FSTL4,MTOR,NTRK3,DNM3,PLXNA2,PTPRD,ELAVL4,MAGI2,RALA,PRKD1,HDAC2,TNN,SEMA3D,FAT3,ROBO2,NEDD9,SEMA5A,BCL11A,DCC,CTNNA2,CHN1,SEMA3C                                                                                                                                                                                                                                                                                                                                                                                                                                                                                                                                                                                                                               |
| GO:0050804 | modulation of chemical synaptic transmission       | 1.6962693054422702e-17 | SYN3,PRKCB,CD38,GRIK2,IGSF11,APBA2,DLGAP1,JAK2,CACNG2,BTBD9,CDH11,GRIN2A,NRXN1,GRID1,NTRK2,NRG3,GRIK3,CACNB2,SHANK2,RAP1A,CNTN4,GRIK4,GRIN2B,DGKB,PRKCE,GRIK1,DGKI,SLC1A1,GRM5,NLGN1,SHISA9,RELN,RASGRF2,TNR,CELF4,APP,HCN1,RASGRF1,LRRRC4C,PPP1R9A,ZZEF1,CLSTN2,SORCS2,DISC1,FYN,GRIA1,S100B,GRM1,ERC2,RIMS1,MCTP2,EPHB1,PLCB4,SORCS3,GRID2,NTF3,NTNG1,TMEM108,GRM7,RAPGEF2,NRXN3,NSG1,EPHB2,ERC1,MCTP1,PACSIN2,CDH2,LRFN2,SLC24A2,SYT1,PTPRD,SHISA6,PLCB1,ELAVL4,PLCL1,TSHZ3,CACNG3,PTPRA,MTMR2,UNC13C,RIMS2,DLGAP2,DCC                                                                                                                                                                                                                                                                                                                                                                                                                                                                                                                       |
| GO:0061564 | axon development                                   | 1.883320783996041e-17  | SEMA4D,RPS6KA5,BCL2,NCAM1,JAK2,KALRN,LAMA1,CDH11,NRXN1,LAMA3,ZDHHC17,CTNNA1,NTRK2,NCAM2,TIAM2,CNTN1,NUMB,UNC5D,NREP,SLIT2,ADAMTS1,MACF1,TRIO,CCDC141,CNTN4,SLIT3,ROBO1,PAK3,CHODL,DSCAM,EPHA6,NTN1,IGF1R,MAP2,FLRT2,PTPRO,COBL,CRTAC1,ANK3,RELN,CDH4,TNR,CNTN6,APP,PAK1,LRRRC4C,ALCAM,TIAM1,DISC1,FYN,EPHA7,S100B,CNTN5,EPHB1,EXT1,EFNA5,TRPC5,MARK2,SEMA6D,NTNG1,GRM7,PRKCQ,NRXN3,ATP8A2,AUTS2,EPHB2,PRTG,NRP1,DAB1,SEMA3A,SEMA3E,CDLK1,CDH2,FSTL4,GLI3,PLXNA2,TNN,SEMA3D,VCL,ROBO2,SEMA5A,BCL11A,DCC,CTNNA2,CHN1,PARD3,SEMA3C                                                                                                                                                                                                                                                                                                                                                                                                                                                                                                                 |
| GO:0099177 | regulation of trans-synaptic signaling             | 1.96294310256885e-17   | SYN3,PRKCB,CD38,GRIK2,IGSF11,APBA2,DLGAP1,JAK2,CACNG2,BTBD9,CDH11,GRIN2A,NRXN1,GRID1,NTRK2,NRG3,GRIK3,CACNB2,SHANK2,RAP1A,CNTN4,GRIK4,GRIN2B,DGKB,PRKCE,GRIK1,DGKI,SLC1A1,GRM5,NLGN1,SHISA9,RELN,RASGRF2,TNR,CELF4,APP,HCN1,RASGRF1,LRRRC4C,PPP1R9A,ZZEF1,CLSTN2,SORCS2,DISC1,FYN,GRIA1,S100B,GRM1,ERC2,RIMS1,MCTP2,EPHB1,PLCB4,SORCS3,GRID2,NTF3,NTNG1,TMEM108,GRM7,RAPGEF2,NRXN3,NSG1,EPHB2,ERC1,MCTP1,PACSIN2,CDH2,LRFN2,SLC24A2,SYT1,PTPRD,SHISA6,PLCB1,ELAVL4,PLCL1,TSHZ3,CACNG3,PTPRA,MTMR2,UNC13C,RIMS2,DLGAP2,DCC                                                                                                                                                                                                                                                                                                                                                                                                                                                                                                                       |
| GO:0030154 | cell differentiation                               | 3.612571409660855e-17  | ZHX3,RTN1,ERG,SEMA4D,RPS6KA5,TAOK3,A2M,SLC8A1,GPR55,CD38,FBXO31,PIWIL3,TRAPPC9,BCL2,COL18A1,THRB,RAG1,NCAM1,IL6R,SORBS2,NDRG2,GRIPI1,ASTN2,TANC2,CSMD3,RCAN1,NTN4,JAK2,KALRN,USH2A,NEGR1,FLI1,ZNF536,EPB41L3,LAMA1,PARVB,CDH11,ZBTB7C,GRIN2A,NRXN1,ARID1B,IL1RAPL1,WDPCP,LAMA3,ADCYAP1R1,CTDP1,RPS6KA2,ZDHHC17,KCNH1,PNPLA3,BBS9,CTNNA1,MYO9A,NTRK2,THSD7A,NCAM2,TIAM2,MYT1L,SMARCA4,CNTN1,PLEKHB2,NRG3,PTPRG,SYNE1,FBXL17,NUMB,MTPN,SOX6,MECOM,VCAN,NHS,PTGFRN,UNC5D,NREP,GABRA5,DOK5,DLG5,PGM5,ASTN1,ATRNL1,ARHGAP24,SPRED2,SLIT2,MYLK3,ABCA5,ROR1,ADAMTS1,KAZN,ZNF675,CRB1,ALPK2,HECW1,LCE1F,ERBB4,KANK1,ATRX,DMRT1,MACF1,TAF4B,RAP1A,TRIO,CHSY1,EXT2,ABL2,MAP3K5,NOS1,ABCG1,SPAG16,EML1,HTR2C,CCDC141,CNTN4,RNF17,SLC9C1,SND1,ETS2,ITGA1,TCF12,HIRA,ITGA8,RUNX1,ALDH1A2,MAPK9,CDH17,PEAK1,EYA1,FRMD6,PLS1,ANK2,ZBTB16,SLIT3,ROBO1,PAK3,OVOL2,BRINP1,MLLT3,CHODL,GABPA,GLIS1,PSG9,PACRG,BBS2,MYOM2,SOX5,DSCAM,KDM4C,SDK1,SLC1A1,GRM5,EPHA6,NTN1,NR5A2,IGF1R,NLGN1,SHROOM3,JAM2,MSI2,CNTNAP2,MAP2,CFTR,CAMK1D,FLRT2,PTPRO,NHSL1,COBL,CATSPER2 |

|            |                       |                       |                                                                                                                                                                                                                                                                                                                                                                                                                                                                                                                                                                                                                                                                                                                                                                                                                                                                                                                                                                                                                                                                                                                                                                                                                                                                                                                                                                                                                                                                                                                                                                                                                                                                                                                                                                                                                                                                                                                                                                                                                                                                                                                                                                                                                                                                                                                                                                                                                                                                                                                                    |
|------------|-----------------------|-----------------------|------------------------------------------------------------------------------------------------------------------------------------------------------------------------------------------------------------------------------------------------------------------------------------------------------------------------------------------------------------------------------------------------------------------------------------------------------------------------------------------------------------------------------------------------------------------------------------------------------------------------------------------------------------------------------------------------------------------------------------------------------------------------------------------------------------------------------------------------------------------------------------------------------------------------------------------------------------------------------------------------------------------------------------------------------------------------------------------------------------------------------------------------------------------------------------------------------------------------------------------------------------------------------------------------------------------------------------------------------------------------------------------------------------------------------------------------------------------------------------------------------------------------------------------------------------------------------------------------------------------------------------------------------------------------------------------------------------------------------------------------------------------------------------------------------------------------------------------------------------------------------------------------------------------------------------------------------------------------------------------------------------------------------------------------------------------------------------------------------------------------------------------------------------------------------------------------------------------------------------------------------------------------------------------------------------------------------------------------------------------------------------------------------------------------------------------------------------------------------------------------------------------------------------|
|            |                       |                       | , CRTAC1, CUX1, ANK3, TBCD, RELN, TRPS1, ADAMTS5, MYO18B, CDH4, TNFR, OCA2, CELF4, CNTN6, APP, PUM1, CDC88A, SPOCK1, ADAM12, PAK1, MITF, HCN1, FRY, CXADR, TENM4, CECR2, GHR, RASGRF1, RIN2, PRDM16, RBFOX1, MEIS2, LRRC4C, ALCAM, PPP1R9A, SLAMF1, NEBL, RARB, TCF4, FRYL, TIAM1, PBX1, PHACTR1, SLC39A12, DISC1, ZFP M2, NTM, ASAP1, EDAR, FYN, EPHA7, NAV2, STK3, COL19A1, MSR1, S100B, TOX, PCDH15, ESR1, SGCZ, PDE4D, CNTN5, PDE3A, RIMS1, POR, CERS3, WWOX, EPHB1, CREM, FHOD3, EFEMP1, ARMC2, AJAP1, HERC1, DOCK1, FLT1, EXT1, EFNA5, NXN, C14ORF39, HDAC4, KLHL1, TRPC5, FTO, PPFA2, AKAP6, POU6F2, TENM3, OPCML, MARK2, ATF2, GRID2, ZNF423, LRP2, SEMA6D, NTF3, FER, SNRK, CAMK4, NTNG1, SGCD, TME M108, GRM7, RAPGEF2, NAV3, PRKCQ, KIRREL3, CPS1, PRKCH, NRXN3, ATP8A2, UBE3A, APC, AUTS2, TFF1, EPHB2, PDLIM5, PRTG, CTNND2, COL22A1, SETD2, DOCK2, SDCCAG8, FLVCR1, NRP1, MDGA2, RPGRIP1, DAB1, ALK, LDLRAD4, SEMA3A, SEMA3E, MYEF2, DCLK1, CDH2, ARI D5B, TENM2, TANC1, SYCP1, HDAC9, PIK3R3, MAP2K6, FSTL4, MTOR, RORB, GABRB1, FBLN1, FHL2, NCAPG2, SPRED1, SIPA1L3, FLNB, ABC B5, DPY19L2, GLI3, NTRK3, RXFP1, FBN1, HYDIN, TBX15, ZNF521, H MGA2, NSUN2, DNM3, SYT1, DPF3, NPHP4, PPARA, PLXNA2, PTPRD, RO RA, PLCB1, LOXL2, PRKG1, RASGRP1, ELAVL4, DMBT1, MAGI2, NELL1, ABI1, DOCK10, FNDC3A, PRKD1, BCL2L1, HDAC2, ETS1, TNN, SEMA3 D, PRLR, TBX20, FAT3, MTMR2, VCL, ATAT1, ROBO2, IFT81, CDH23, A KAP13, NEDD9, ENPP1, PCP4, RIMS2, RAB27A, EYA4, L3MBTL3, HIVE P3, SEMA5A, BCL11A, DCC, CTNNA2, CHN1, ETV6, PARD3, NRG1, PRKC A, FMN2, SEMA3C                                                                                                                                                                                                                                                                                                                                                                                                                                                                                                                                                                                                                                                                                                                                                                                                                                                                                                                                                             |
| GO:0065007 | biological regulation | 5.741685810707726e-17 | CD44, SAMD4A, KCNMA1, C10ORF90, PKNOX2, ZHX3, APBB2, PTPRR, S CAF8, RTN1, ERG, PARN, PDE1C, SEMA4D, INIP, SLC12A8, MED13L, E VC, TEAD1, NFIA, SYN3, RPS6KA5, DHRS11, TAOX3, PRKCB, EIF4G3, A2M, SLC8A1, ANKRD6, KCNC1, GPR55, DNAJC15, SIAH3, CD38, ZNF2 57, FBXO31, PIWIL3, TRAPPC9, BCL2, MMP16, CAMTA1, SAMS1, CHF R, THADA, COL18A1, TOX3, THRB, DNAH11, ZSCAN5C, RAG1, CDC42EP 3, GRIK2, IGSF11, SNX25, UNC13B, MAPK10, NCAM1, KDM4B, GNG12, IL6R, KCNQ5, CDH8, ZBTB20, HEPHL1, SCN11A, ATP10A, SORBS2, SK AP2, HS1BP3, KCNJ6, CASP5, KCNK10, BRD4, GPR158, ZNF568, NDRG 2, GRIP1, APBA2, TLK1, ASTN2, TANC2, CSMD3, DLGAP1, RCAN1, NTN 4, JAK2, TM9SF4, BICD1, MIR17HG, ABCG8, OTUD7A, TPT2, KALRN, USH2A, NEGR1, FGF12, CACNG2, BTBD9, NFAT5, FLI1, TRHDE, ZNF53 6, EPB41L3, LAMA1, PARVB, CDH11, ZBTB7C, GRIN2A, MAST4, NRXN1, NELL2, ARID1B, IL1RAPL1, WDPCP, MAGI1, LAMA3, ADCYAP1R1, CT DP1, DPP6, GRID1, RPS6KA2, SMOC2, ZDHHC17, KCNH1, DCDC1, CACN A1C, BMF, EXOC4, WDR70, PNPLA3, ANO4, FAM83B, CTNNA1, MYO9A, N TRK2, FOXN3, OCLN, NLK, ITGBL1, NBEA, RASGEF1B, AFAP1, TIAM2, MYT1L, TMPRSS3, SRGAP2B, IQCJ- SCHIP1, SMARCA4, RNF152, CNTN1, ZNRF3, PALMD, MEOX2, TTC39B, ENPEP, PLEKHB2, GLIS3, NRG3, PTPRG, MC2R, BTBD11, ELMO1, SLC2 4A4, CABIN1, FBXL17, GAS2, GRIK3, CACNB2, PDE10A, NUMB, STXBP 4, MED15, MTPN, MTIHL1, SOX6, MECOM, TBC1D22A, PDE4DIP, STK32 B, RGS12, SHANK2, RAPGEF5, UBE2E2, KCTD8, UNC5D, ZNF567, NREP , GABRA5, DOK5, DLG5, CFDP1, SMARCA1, ZIM3, ATRNL1, CHRM3, CP E, ARHGAP24, SPRED2, IGHV10R15- 9, SLIT2, PITPNC1, MYLK3, ABCA5, ROR1, GLP2R, SLC4A4, ZNF675, CSNK2A1, DTNA, AKT3, CRB1, KMT2C, KCNE4, TRIM5, KCNS3, PSD3, A LPK2, ABCA13, HECW1, RAP1GDS1, AFF3, ERBB4, KANK1, GPHN, ATRX , DMRT1, CHST8, BID, MACF1, MNAT1, TAF4B, RAP1A, TRIO, CTNBNB1 , RAD51B, PTPRE, DUSP22, CHSY1, MYOM1, PSG8, EXT2, ZSCAN30, OR 4C46, ABL2, PSMA1, MAP3K5, NOS1, ACACA, ABCG1, RGS3, MAML2, RE RG, HTR2C, NEK4, CACNA1E, CTIF, CNTN4, TBC1D5, SAMD13, SLC40A 1, SLCO3A1, GABRR2, PIK3C3, SLC9C1, TRAF3, SND1, CHD6, FGD4, E TS2, ITGA1, TCF12, ZNF721, HIRA, CORO2B, ITGA8, GRIK4, RBM19, RUNX1, KIR3DL2, ALDH1A2, GABRG1, TSHZ2, MAPK9, ESRRG, PTGFR, IGHV10R21- 1, FAM171A1, ZNF595, CDH17, PEAK1, EYA1, MORC3, ANKS1B, P2RX6 , AKAP10, SPOCK3, FRMD6, PLS1, SPON1, ANK2, PLA2G4A, SLC1A2, Z BTB16, SUPT3H, SLIT3, GRIN2B, ZNF518A, PHC2, ROBO1, ZNF578, E GFLAM, PAK3, DGKB, GARNL3, DPH6, EBF1, TNKS, KLF12, NDFIP2, GA BRA2, MDM1, OVOL2, FCHSD2, SGMS1, ITPR2, BRINP1, MLLT3, BCL2L |

|  |  |                                                                                                                                                                                                                                                                                                                                                                                                                                                                                                                                                                                                                                                                                                                                                                                                                                                                                                                                                                                                                                                                                                                                                                                                                                                                                                                                                                                                                                                                                                                                                                                                                                                                                                                                                                                                                                                                                                                                                                                                                                                                                                                                                                                                                                                                                                                                                                                                                                                                                                                                                                                                                                                                                                                                                                                                                                                                                                                                                                                                                                                                                                                                                                                                                                                                                                                                                                                                                                                                                                                                                                                                                                                                                                                                                                                                                                                                                                                                                                                                                                                                                                                                                                                                                                 |
|--|--|---------------------------------------------------------------------------------------------------------------------------------------------------------------------------------------------------------------------------------------------------------------------------------------------------------------------------------------------------------------------------------------------------------------------------------------------------------------------------------------------------------------------------------------------------------------------------------------------------------------------------------------------------------------------------------------------------------------------------------------------------------------------------------------------------------------------------------------------------------------------------------------------------------------------------------------------------------------------------------------------------------------------------------------------------------------------------------------------------------------------------------------------------------------------------------------------------------------------------------------------------------------------------------------------------------------------------------------------------------------------------------------------------------------------------------------------------------------------------------------------------------------------------------------------------------------------------------------------------------------------------------------------------------------------------------------------------------------------------------------------------------------------------------------------------------------------------------------------------------------------------------------------------------------------------------------------------------------------------------------------------------------------------------------------------------------------------------------------------------------------------------------------------------------------------------------------------------------------------------------------------------------------------------------------------------------------------------------------------------------------------------------------------------------------------------------------------------------------------------------------------------------------------------------------------------------------------------------------------------------------------------------------------------------------------------------------------------------------------------------------------------------------------------------------------------------------------------------------------------------------------------------------------------------------------------------------------------------------------------------------------------------------------------------------------------------------------------------------------------------------------------------------------------------------------------------------------------------------------------------------------------------------------------------------------------------------------------------------------------------------------------------------------------------------------------------------------------------------------------------------------------------------------------------------------------------------------------------------------------------------------------------------------------------------------------------------------------------------------------------------------------------------------------------------------------------------------------------------------------------------------------------------------------------------------------------------------------------------------------------------------------------------------------------------------------------------------------------------------------------------------------------------------------------------------------------------------------------------------------|
|  |  | 13, LEMD3, KHDRBS2, CPQ, RNFL38, CHODL, GABPA, PRICKLE2, ITGB3BP, CACNA2D3, DGKK, TMEM67, PRKCE, GLIS1, PSG9, ARHGEF11, PRKAA2, PACRG, BBS2, IL1RAPL2, EDIL3, CDYL2, PTPRN2, HIVEP2, KCNH8, GRIK1, SOX5, DSCAM, DGKI, RIN3, ANKFN1, DNMBP, EFHB, KDM4C, ACSM2A, DCUN1D4, SDK1, SLC1A1, SLC12A1, GRM5, EPHA6, NTN1, ARAP2, NR5A2, LDB2, IGF1R, SPTB, SNX30, NLGN1, SHISA9, OR9Q1, SHROOM3, JAM2, ALX4, CORIN, CNTNAP2, MAP2, KCNIP4, CFTR, CAMK1D, FLRT2, MLLT10, NOS1AP, PTPRO, NKAIN2, CD96, RBMS3, INSR, COBL, CTNNAL1, CLEC16A, PHF20L1, ITGA9, MTRF1, CATSPER2, EGLN3, CUX1, ANK3, MORC2, GMDS, CNIH3, DOCK3, TBCD, GPC6, RELN, RASGRF2, TRPS1, ADAMTS5, STK38, AOA, FBXO32, CDH4, TNFR, ADCY9, DPP10, CELF4, DAPK1, VAV3, INPP5A, ZNF600, VRK1, ZNF678, CNTN6, CLIC6, ZNF420, APP, FBLN5, PUM1, CCDC88A, ARNT2, KCTD1, RNLS, SPOCK1, HPSE2, PLCE1, ADAM12, PAK1, ATP9B, GNAL, MITF, IGF2BP3, CACNA2D1, ADCK1, HCN1, PPP1R13B, CHRM5, NSMCE2, ZNF208, FRY, CXADR, EPS8, LRFN5, UTRN, GPC5, TENM4, PRR16, TSPAN13, GHR, DUX4, RIPK4, RASGRF1, RIN2, PRDM16, FRMD5, RNF217, USP7, RBO, OX1, MEIS2, KIR2DL4, STARD13, SCP2, KL, LRRC4C, ALCAM, PPP1R9A, AVEN, TMEM117, ADAMTS16, TASP1, MICU1, ZZEF1, LTBP1, SLAMF1, RGL1, NKAIN3, BACE2, INO80D, CLSTN2, RARB, DDO1, WDR12, TCF4, TIAM1, FOCAD, PBX1, PHACTR1, MLIP, SORCS2, PRIM2, SLC39A12, ASAP2, DISC1, FMN1, RALGPS1, ARHGAP42, ZFPM2, PIEZO2, VSTM4, SVEP1, ASAP1, PCBP3, FRMPD4, EDAR, EGF, PDGFR, FYN, FAM3B, KCND3, PRMT8, XRCC4, EPHA7, FHIT, NSG2, GRIA1, ZNF627, TRABD2B, SPIDR, NAV2, STK3, CNOT7, MSR1, PSIP1, AP2B1, USP18, S100B, NET1, TOX, PCDH15, ESR1, ARHGAP12, GABRG3, SGCZ, PLCXD3, KCNAB1, GRM1, PDE4D, ERC2, PRKACB, GNG2, PDE3A, RIMS1, POR, L3MBTL4, DOCK4, ATP6V1E1, FRMD4A, MCTP2, WWOX, PCSK2, HUNK, CNKSR2, FUT8, EPHB1, SSBP2, CREM, CTNBP2, FHOD3, EFEMP1, TNRC6B, AJAP1, ABCC9, SNAP29, GSG1L, HERC1, DOCK1, PARP15, TRPM7, FLT1, EXOT1, EFNA5, NXN, CDC14B, C14ORF39, HDAC4, ZNF717, STK36, TRPC5, AMFR, PLCB4, ATP9A, FTO, PPFIA2, SH3BP5, AKAP6, SORCS3, POU6F2, TENM3, LINGO2, MARK2, ATF2, PHACTR2, ZNF880, RBBP8, GRID2, ZNF423, LRP2, SEMA6D, ZNF573, C2, RALGPS2, NTF3, FER, SNRK, SUSD4, CAMK4, CELF2, TP53I11, NTNG1, MAPRE2, ARFGAP3, MICU2, ISX, RAD51AP1, SGCD, TMEM108, RIC8B, GABRB3, TPTE, GRM7, SLC39A8, RAPGEF2, NAV3, MX1, PLGRKT, PPA2, ZNF615, GTF2I, ATXN1, PRKCQ, GABRG2, CPS1, PRKCH, NRXN3, RHPN2, RABGAP1L, DLC1, NSG1, GABBR2, KCND2, ATP8A2, SLC24A3, UBE3A, GRIA4, IDE, APC, ZBTB25, INO80, AUTS2, TFF1, EPHB2, SCAF4, ERC1, ZNF850, PDLIM5, AGO3, C9, TMTC2, MCTP1, MOB3B, RYR3, NBAS, PRTG, NBN, ADAMTS18, RGM, CTNND2, SETD2, PACSIN2, PKP1, DOCK2, NUP214, TRIM23, SDCCAG8, FLVCR1, NRP1, CDH13, RFC3, PHACTR3, ZNF879, DACH1, TRDN, SLC2A13, ZNF397, DAB1, RFTN1, ALK, EVC2, LDLRAD4, SEMA3A, SEMA3E, MGAT5, ATP13A3, MALRD1, MYEF2, DCLK1, MAGI3, KIF16B, NRP1, CDH2, ARID5B, SIPA1L2, CCNG2, RCAN2, LRRC69, TENM2, TANC1, SERPINB7, EVI5, VPS41, SYCP1, ZNF407, ASB3, HDAC9, PIK3R3, MAP2K6, FSTL4, ARHGAP28, MTOR, STK38L, KSR1, RALGAP2, RORB, GABRB1, FBLN1, SGSM1, ST8SIAL, BLM, SH3KBP1, FHL2, CADPS, NEU3, NCAPG2, RGS7, STK32A, CD2AP, ZFP30, USP25, SPRED1, SIPA1L3, ADAM10, DRAM1, PPP2R2C, KANSL1, LRFN2, FLNB, SCAI, PAPP2, ABCB5, PTPRT, CSMD1, TRERF1, SLC24A2, GLI3, NTRK3, RXFP1, FBN1, RAB31, CTNNA3, VPS13D, ABHD17C, ZNF292, TBX15, RAPGEF4, BMPE, R, ANKRD31, ZNF521, PDE1A, TMPRSS2, ATF7IP, HMGA2, MX2, CREB5, NSUN2, DEFA3, PTPRK, SORCS1, TBC1D4, DNMT3, SYT1, APIP, SYNDIG1, ASXL3, DPFF3, NPHP4, DOCK9, PPP1R12B, SACS, PPARA, PLXNA2, PTPRD, RORA, SHISA6, SCARA5, PLCB1, LOXL2, BPTF, PRKG1, RASGRP1, ELAVL4, NLRC5, STXBP6, MXI1, TTC28, MAGI2, NELL1, STX12, PLLCL1, ABI1, TSHZ3, ASIC2, RALA, DOCK10, TRPM1, CACNG3, NECAB1, PRKD1, ATP8A1, TNFAIP8, BCL2L1, HDAC2, ETS1, MRPS27, TNN, RYR2, SEMA3D, LDLRAD3, BANP, TGFA, PRLR, TBX20, PTPRA, FAT3, OR11G2, MTMR2, KCNH5, ATF6, IL16, VCL, DEPTOR, BACH1, ATAT1, ROBO2, EWSR1, IFT81, ZMYND11, CDH23, RGS6, SRGAP3, AKAP13, WDR41, NEDD9, MYRIP, ENPP1, UNC13C, PCP4, RIMS2, STAC, SCN8A, RAB27A, EYA4, RALGAP1, L3MBTL3, DLGAP2, POMT2, HIVEP3, CLIP1, SEMA5A, CABLES1, PRDM15, OR4N2, BCL11A, AGAP1, DCC, ZNF112, CTNNA |
|--|--|---------------------------------------------------------------------------------------------------------------------------------------------------------------------------------------------------------------------------------------------------------------------------------------------------------------------------------------------------------------------------------------------------------------------------------------------------------------------------------------------------------------------------------------------------------------------------------------------------------------------------------------------------------------------------------------------------------------------------------------------------------------------------------------------------------------------------------------------------------------------------------------------------------------------------------------------------------------------------------------------------------------------------------------------------------------------------------------------------------------------------------------------------------------------------------------------------------------------------------------------------------------------------------------------------------------------------------------------------------------------------------------------------------------------------------------------------------------------------------------------------------------------------------------------------------------------------------------------------------------------------------------------------------------------------------------------------------------------------------------------------------------------------------------------------------------------------------------------------------------------------------------------------------------------------------------------------------------------------------------------------------------------------------------------------------------------------------------------------------------------------------------------------------------------------------------------------------------------------------------------------------------------------------------------------------------------------------------------------------------------------------------------------------------------------------------------------------------------------------------------------------------------------------------------------------------------------------------------------------------------------------------------------------------------------------------------------------------------------------------------------------------------------------------------------------------------------------------------------------------------------------------------------------------------------------------------------------------------------------------------------------------------------------------------------------------------------------------------------------------------------------------------------------------------------------------------------------------------------------------------------------------------------------------------------------------------------------------------------------------------------------------------------------------------------------------------------------------------------------------------------------------------------------------------------------------------------------------------------------------------------------------------------------------------------------------------------------------------------------------------------------------------------------------------------------------------------------------------------------------------------------------------------------------------------------------------------------------------------------------------------------------------------------------------------------------------------------------------------------------------------------------------------------------------------------------------------------------------------------|

|            |                                  |                        |                                                                                                                                                                                                                                                                                                                                                                                                                                                                                                                                                                                                                                                                                                                                                                                                                                                                                                                                                                                                                                                                                                                                                                                                                                                                                                                                                                                                                                                                                                                                                                                                                                                                                                                                                                                                                                                                                                                                                                                                                                                                                                                                                                                                                                                                                                                                                                                                                                                                                                                                                                |
|------------|----------------------------------|------------------------|----------------------------------------------------------------------------------------------------------------------------------------------------------------------------------------------------------------------------------------------------------------------------------------------------------------------------------------------------------------------------------------------------------------------------------------------------------------------------------------------------------------------------------------------------------------------------------------------------------------------------------------------------------------------------------------------------------------------------------------------------------------------------------------------------------------------------------------------------------------------------------------------------------------------------------------------------------------------------------------------------------------------------------------------------------------------------------------------------------------------------------------------------------------------------------------------------------------------------------------------------------------------------------------------------------------------------------------------------------------------------------------------------------------------------------------------------------------------------------------------------------------------------------------------------------------------------------------------------------------------------------------------------------------------------------------------------------------------------------------------------------------------------------------------------------------------------------------------------------------------------------------------------------------------------------------------------------------------------------------------------------------------------------------------------------------------------------------------------------------------------------------------------------------------------------------------------------------------------------------------------------------------------------------------------------------------------------------------------------------------------------------------------------------------------------------------------------------------------------------------------------------------------------------------------------------|
|            |                                  |                        | 2, PVT1, CHN1, ETV6, VPS13C, KCNJ15, PARD3, NRG1, CAST, TBC1D9, FANK1, ZNF845, ATP10B, NPAS3, PRKCA, FMN2, SEMA3C, FANCB, CSF2RB, PCNT, PAH, ST18, TOP1                                                                                                                                                                                                                                                                                                                                                                                                                                                                                                                                                                                                                                                                                                                                                                                                                                                                                                                                                                                                                                                                                                                                                                                                                                                                                                                                                                                                                                                                                                                                                                                                                                                                                                                                                                                                                                                                                                                                                                                                                                                                                                                                                                                                                                                                                                                                                                                                        |
| GO:0007409 | axonogenesis                     | 5.81453645767252e-17   | SEMA4D, RPS6KA5, BCL2, NCAM1, KALRN, LAMA1, CDH11, NRXN1, LAMA3, ZDHHC17, NTRK2, TIAM2, CNTN1, NUMB, UNC5D, SLIT2, ADAMTSL1, MACF1, TRIO, CCDC141, CNTN4, SLIT3, ROBO1, PAK3, CHODL, DSCAM, EPHA6, NTN1, IGF1R, MAP2, FLRT2, PTPRO, COBL, ANK3, RELN, CDH4, TNFR, CNTN6, APP, PAK1, LRRC4C, ALCAM, TIAM1, DISC1, FYN, EPHA7, S100B, CNTN5, EPHB1, EXT1, EFNA5, TRPC5, MARK2, SEMA6D, NTNG1, PRKCQ, NRXN3, ATP8A2, AUTS2, EPHB2, PRTG, NRP1, DAB1, SEMA3A, SEMA3E, DCLK1, CDH2, FSTL4, GLI3, PLXNA2, TNN, SEMA3D, VCL, ROBO2, SEMA5A, BCL11A, DCC, CTNNA2, CHN1, PARD3, SEMA3C                                                                                                                                                                                                                                                                                                                                                                                                                                                                                                                                                                                                                                                                                                                                                                                                                                                                                                                                                                                                                                                                                                                                                                                                                                                                                                                                                                                                                                                                                                                                                                                                                                                                                                                                                                                                                                                                                                                                                                                  |
| GO:0065008 | regulation of biological quality | 8.517457066082835e-17  | SAMD4A, KCNMA1, C10ORF90, APBB2, PARN, SEMA4D, SLC12A8, SYN3, DHRS11, PRKCB, SLC8A1, KCNC1, GPR55, SIAH3, CD38, BCL2, CHFR, THADA, THRB, RAG1, CDC42EP3, GRIK2, IGSF11, UNC13B, CDH8, ZBTB20, HEPHL1, SCN11A, ATP10A, KCNK10, GRIP1, APBA2, TANC2, JAK2, TM9SF4, ABCG8, KALRN, USH2A, NEGR1, FGF12, CACNG2, BTBD9, FLI1, TRHDE, GRIN2A, NRXN1, NELL2, IL1RAPL1, ADCYAP1R1, GRID1, RPS6KA2, KCNH1, CACNA1C, PNPLA3, ANO4, NTRK2, OCLN, NLK, NBEA, TMPRSS3, SMARCA4, TTC39B, ENPEP, SLC24A4, GRIK3, CACNB2, NUMB, STXBP4, MTPN, MT1HL1, SHANK2, GABRA5, DLG5, CHRM3, CPE, SLIT2, MYLK3, ABCA5, SLC4A4, ZNF675, AKT3, CRB1, KCNE4, RAP1GDS1, ERBB4, KANK1, GPHN, CHST8, BID, MACF1, RAP1A, EXT2, ABL2, NOS1, ACACA, ABCG1, HTR2C, CNTN4, SLC40A1, GABRR2, SLC9C1, ITGA1, CORO2B, GRIK4, ALDH1A2, GABRG1, ESRRG, PTGFR, MORC3, P2RX6, PLS1, ANK2, PLA2G4A, SLC1A2, GRIN2B, PAK3, DGKB, GABRA2, FCHSD2, ITPR2, CPQ, DGKK, PRKCE, PRKAA2, BBS2, IL1RAPL2, PTPRN2, KCNH8, GRIK1, DSCAM, DGKI, RIN3, ACSM2A, SLC1A1, SLC12A1, GRM5, NTN1, NR5A2, LDB2, IGF1R, SPTB, NLGN1, SHISA9, JAM2, CORIN, MAP2, CFTR, FLRT2, NOS1AP, PTPRO, INSR, ANK3, GPC6, RELN, RASGRF2, ADAMTS5, CDH4, TNFR, CELF4, VAV3, APP, PUM1, RNLS, PLCE1, ATP9B, IGF2BP3, CACNA2D1, ADCK1, HCN1, CXADR, EPS8, LRFN5, PRR16, GHR, RASGRF1, PRDM16, USP7, SCP2, KL, ADAMTS16, MICU1, ZEF1, BACE2, CLSTN2, SORCS2, SLC39A12, DISC1, FMN1, ARHGAP42, PIEZO2, VSTM4, FRMPD4, FYN, FAM3B, KCND3, EPHA7, GRIA1, NAV2, STK3, CNOT7, AP2B1, S100B, PCDH15, ESR1, GABRG3, SGCZ, GRM1, PDE4D, ERC2, PRKACB, PDE3A, RIMS1, POR, DOCK4, MCTP2, PCSK2, EPHB1, CTTNBP2, FHOD3, TNRC6B, ABCC9, SNAP29, GSG1L, TRPM7, EXT1, EFNA5, TRPC5, ATP9A, FTO, PPFIA2, AKAP6, SORCS3, LINGO2, ATF2, GRID2, ZNF423, SEMA6D, FER, MICU2, SGCD, TMEM108, GABRB3, SLC39A8, RAPGEF2, PPA2, PRKCQ, GABRG2, CPS1, NRXN3, NSG1, KCND2, ATP8A2, SLC24A3, UBE3A, IDE, APC, TFF1, EPHB2, ERC1, PDLIM5, AGO3, TMTC2, MCTP1, RYR3, ADAMTS18, FLVCR1, NRP1, TRDN, ALK, SEMA3A, SEMA3E, ATP13A3, MALRD1, MYEF2, CDH2, TANC1, HDAC9, MAP2K6, FSTL4, ARHGAP28, MTOR, GABRB1, FBLN1, CADPS, NCAPG2, ADAM10, LRFN2, ABCB5, CSMD1, SLC24A2, NTRK3, CTNNA3, ABHD17C, RAPGEF4, ATF7IP, NSUN2, DNM3, SYT1, SYNDIG1, NPHP4, PPARA, PTPRD, RORA, SHISA6, SCARA5, PRKG1, ELAVL4, STX12, PLCL1, TSHZ3, ASIC2, DOCK10, TRPM1, CACNG3, PRKD1, ATP8A1, BCL2L1, ETS1, RYR2, SEMA3D, PRLR, MTMR2, KCNH5, VCL, DEPTOR, ROBO2, CDH23, NEDD9, MYRIP, ENPP1, UNC13C, RIMS2, SCN8A, RAB27A, L3MBTL3, SEMA4A, BCL11A, DCC, CTNNA2, NRG1, ATP10B, PRKCA, SEMA3C, PAH |
| GO:0010646 | regulation of cell communication | 4.1293350305836235e-16 | CD44, PTPRR, SEMA4D, EVC, SYN3, TAOK3, PRKCB, SLC8A1, ANKRD6, GPR55, CD38, BCL2, CAMTA1, THRB, GRIK2, IGSF11, SNX25, UNC13B, NCAM1, IL6R, BRD4, NDRG2, APBA2, DLGAP1, RCAN1, JAK2, BICD1, OTUD7A, TPTE2, KALRN, FGF12, CACNG2, BTBD9, NFAT5, ZNF536, LAMA1, CDH11, GRIN2A, NRXN1, ADCYAP1R1, GRID1, SMOC2, ZDHHC17, CTNNA1, MYO9A, NTRK2, NLK, AFAP1, TIAM2, IQCJ-SCHIP1, SMARCA4, RNF152, ZNRF3, NRG3, SLC24A4, FBXL17, GAS2, GRIK3, CACNB2, PDE10A, STXBP4, MECOM, RGS12, SHANK2, KCTD8, NREP, DOK5, DLG5, ARHGAP24, SPRED2, SLIT2, ROR1, ZNF675, CSNK2A1, AKT3, TRIM5, PSD3, ALPK2, HECW1, RAP1GDS1, ERBB4, KANK1, DMRT1, BID, MACF1, RAP1A, TRIO, PTPRE, DUSP22, CHSY1, ABL2, MAP3K5, RGS3, HTR2C, CNTN4, TRAF3, FGD4, ITGA1, ITGA8, GRIK4, MAPK9, EYA1, ANK2, SLIT3, GRIN2B, ROBO1, PAK3, DGKB, GARNL3, TNKS, NDFIP2, OVOL2, SGMS1, MLLT3, LEMD3, PRKCE, ARHGEF11, PRKAA2                                                                                                                                                                                                                                                                                                                                                                                                                                                                                                                                                                                                                                                                                                                                                                                                                                                                                                                                                                                                                                                                                                                                                                                                                                                                                                                                                                                                                                                                                                                                                                                                                                                                                 |

|            |                         |                        |                                                                                                                                                                                                                                                                                                                                                                                                                                                                                                                                                                                                                                                                                                                                                                                                                                                                                                                                                                                                                                                                                                                                                                                                                                                                                                                                                                                                                                                                                                                                                                                                                                                                                                                                                                                                                                                                                                                                                                                            |
|------------|-------------------------|------------------------|--------------------------------------------------------------------------------------------------------------------------------------------------------------------------------------------------------------------------------------------------------------------------------------------------------------------------------------------------------------------------------------------------------------------------------------------------------------------------------------------------------------------------------------------------------------------------------------------------------------------------------------------------------------------------------------------------------------------------------------------------------------------------------------------------------------------------------------------------------------------------------------------------------------------------------------------------------------------------------------------------------------------------------------------------------------------------------------------------------------------------------------------------------------------------------------------------------------------------------------------------------------------------------------------------------------------------------------------------------------------------------------------------------------------------------------------------------------------------------------------------------------------------------------------------------------------------------------------------------------------------------------------------------------------------------------------------------------------------------------------------------------------------------------------------------------------------------------------------------------------------------------------------------------------------------------------------------------------------------------------|
|            |                         |                        | ,GRIK1,DGKI,DNMBP,EFHB,KDM4C,SLC1A1,GRM5,IGF1R,NLGN1,SHISA9,CFTR,NOS1AP,PTPRO,RBMS3,INSR,CLEC16A,ANK3,CNIH3,DOCK3,GPC6,RELN,RASGRF2,STK38,TNR,CELF4,DAPK1,VAV3,CNTN6,APP,PUM1,CCDC88A,PLCE1,PAK1,HCN1,CXADR,EPS8,GPC5,GHR,RASGRF1,PRDM16,USP7,STARD13,KL,LRRC4C,PPP1R9A,ZZEF1,LTBP1,SLAMF1,CLSTN2,TIAM1,SORCS2,DISC1,RALGPS1,ARHGAP42,EDAR,EGF,PDGFD,FYN,EPHA7,GRIA1,TRABD2B,STK3,CNOT7,USP18,S100B,NET1,ESR1,ARHGAP12,GRM1,PDE4D,ERC2,PRKACB,PDE3A,RIMS1,POR,MCTP2,WWOX,CNKSR2,EPHB1,GSG1L,FLT1,EFNA5,NXN,STK36,AMFR,PLCB4,AKAP6,SORCS3,GRID2,ZNF423,LRP2,RALGPS2,NTF3,FER,NTNG1,MAPRE2,TMEM108,RIC8B,TPTE,GRM7,RAPGEF2,PRKCQ,PRKCH,NRXN3,DLC1,NSG1,UBE3A,APC,AUTS2,EPHB2,ERC1,AGO3,MCTP1,MOB3B,CTNND2,PACSIN2,DOCK2,NRP1,CDH13,TRDN,DAB1,ALK,LDLRAD4,SEMA3A,SEMA3E,MGAT5,MAGI3,CDH2,SIPA1L2,MAP2K6,FSTL4,ARHGAP28,MTOR,KSRI,RALGAPA2,FBLN1,FHL2,NEU3,NCAPG2,RGS7,CD2AP,SPRED1,SIPA1L3,ADAM10,LRFN2,SCAI,PTPRT,SLC24A2,GLI3,NTRK3,FBN1,BMPER,SYT1,APIP,NPHP4,PPARA,PTPRD,RORA,SHISA6,PLCB1,RASGRP1,ELAVL4,NLRC5,MAGI2,PLCL1,TSHZ3,CACNG3,PRKD1,BCL2L1,HDAC2,TNN,RYR2,TGFA,PRLR,TBX20,PTPRA,MTMR2,ATF6,DEPTOR,ROBO2,IFT81,ZMYND11,RGS6,SRGAP3,AKAP13,MYRIP,ENPP1,UNC13C,RIMS2,EYA4,RALGAPA1,DLGAP2,SEMA5A,PRDM15,DCC,CHN1,NRG1,PRKCA                                                                                                                                                                                                                                                                                                                                                                                                                                                                                                                                                                                                                                                                                                                                                       |
| GO:0023051 | regulation of signaling | 1.2984168247683734e-15 | CD44,PTPRR,SEMA4D,EVC,SYN3,TAOK3,PRKCB,SLC8A1,ANKRD6,GPR55,CD38,BCL2,CAMTA1,THRB,GRIK2,IGSF11,SNX25,UNC13B,NCAM1,IL6R,BRD4,NDRG2,APBA2,DLGAP1,RCAN1,JAK2,BICD1,OTUD7A,TPTE2,KALRN,FGF12,CACNG2,BTBD9,NFAT5,ZNF536,LAMA1,CDH11,GRIN2A,NRXN1,ADCYAP1R1,GRID1,SMOC2,ZDHHC17,CTNNA1,MYO9A,NTRK2,NLK,AFAP1,TIAM2,IQCJ-SCHIP1,SMARCA4,RNF152,ZNRF3,NRG3,SLC24A4,FBXL17,GAS2,GRIK3,CACNB2,PDE10A,STXBP4,MECOM,RGS12,SHANK2,KCTD8,NREP,DOK5,DLG5,ARHGAP24,SPRED2,SLIT2,ROR1,ZNF675,CSNK2A1,AKT3,TRIM5,PSD3,ALPK2,HECW1,RAP1GDS1,ERBB4,KANK1,DMRT1,BID,MACF1,RAP1A,TRIO,PTPRE,DUSP22,CHSY1,ABL2,MAP3K5,RGS3,HTR2C,CNTN4,TRAF3,FGD4,ITGA1,ITGA8,GRIK4,MAPK9,EYA1,ANK2,SLIT3,GRIN2B,ROBO1,PAK3,DGKB,GARNL3,TNKS,NDFIP2,OVOL2,SGMS1,MLLT3,LEMD3,PRKCE,ARHGEF11,PRKAA2,GRIK1,DGKI,DNMBP,EFHB,KDM4C,SLC1A1,GRM5,IGF1R,NLGN1,SHISA9,CORIN,CFTR,NOS1AP,PTPRO,RBMS3,INSR,CLEC16A,CNIH3,DOCK3,GPC6,RELN,RASGRF2,STK38,TNR,CELF4,DAPK1,VAV3,CNTN6,APP,PUM1,CCDC88A,PLCE1,PAK1,HCN1,EPS8,GPC5,GHR,RASGRF1,PRDM16,USP7,STARD13,KL,LRRC4C,PPP1R9A,ZZEF1,LTBP1,SLAMF1,CLSTN2,TIAM1,SORCS2,DISC1,RALGPS1,ARHGAP42,EDAR,EGF,PDGFD,FYN,EPHA7,GRIA1,TRABD2B,STK3,CNOT7,USP18,S100B,NET1,ESR1,ARHGAP12,GRM1,PDE4D,ERC2,PRKACB,PDE3A,RIMS1,POR,MCTP2,WWOX,CNKSR2,EPHB1,GSG1L,FLT1,EFNA5,NXN,STK36,AMFR,PLCB4,AKAP6,SORCS3,GRID2,ZNF423,LRP2,RALGPS2,NTF3,FER,NTNG1,MAPRE2,TMEM108,RIC8B,TPTE,GRM7,RAPGEF2,PRKCQ,PRKCH,NRXN3,DLC1,NSG1,UBE3A,APC,AUTS2,EPHB2,ERC1,AGO3,MCTP1,MOB3B,CTNND2,PACSIN2,DOCK2,NRP1,CDH13,DAB1,ALK,LDLRAD4,SEMA3A,SEMA3E,MGAT5,MAGI3,KIF16B,CDH2,SIPA1L2,MAP2K6,FSTL4,ARHGAP28,MTOR,KSRI,RALGAPA2,FBLN1,FHL2,NEU3,NCAPG2,RGS7,CD2AP,SPRED1,SIPA1L3,ADAM10,LRFN2,SCAI,PTPRT,SLC24A2,GLI3,NTRK3,FBN1,BMPER,SYT1,APIP,NPHP4,PPARA,PTPRD,RORA,SHISA6,PLCB1,RASGRP1,ELAVL4,NLRC5,MAGI2,PLCL1,TSHZ3,CACNG3,PRKD1,BCL2L1,HDAC2,TNN,RYR2,TGFA,PRLR,TBX20,PTPRA,MTMR2,ATF6,DEPTOR,ROBO2,IFT81,ZMYND11,RGS6,SRGAP3,AKAP13,MYRIP,ENPP1,UNC13C,RIMS2,EYA4,RALGAPA1,DLGAP2,SEMA5A,PRDM15,DCC,CHN1,NRG1,PRKCA |
| GO:0035556 | intracellular signaling | 1.1004525050090167e-14 | CD44,APBB2,PTPRR,SEMA4D,INIP,TEAD1,RPS6KA5,TAOK3,PRKCB,SLC8A1,ANKRD6,GPR55,FBXO31,BCL2,CAMTA1,CHFR,CDC42EP3,MAPK10,IL6R,BRD4,NDRG2,GRIP1,TLK1,RCAN1,JAK2,OTUD7A,TPTE2,KALRN,FGF12,NFAT5,GRIN2A,MAST4,NRXN1,ADCYAP1R1,RPS6KA2,ZDHHC17,KCNH1,DCDC1,CACNA1C,MYO9A,NTRK2,FOXN3,NLK,RASGEF1B,TIAM2,IQCJ-                                                                                                                                                                                                                                                                                                                                                                                                                                                                                                                                                                                                                                                                                                                                                                                                                                                                                                                                                                                                                                                                                                                                                                                                                                                                                                                                                                                                                                                                                                                                                                                                                                                                                        |

|            |                               |                        |                                                                                                                                                                                                                                                                                                                                                                                                                                                                                                                                                                                                                                                                                                                                                                                                                                                                                                                                                                                                                                                                                                                                                                                                                                                                                                                                                                                                                                                                                                                                                                                                                                                                                                                                                                                                                                                                                                                                                                                                                                                                                                                                                                                                                                                                                                                                                                                                                                                                                                                                        |
|------------|-------------------------------|------------------------|----------------------------------------------------------------------------------------------------------------------------------------------------------------------------------------------------------------------------------------------------------------------------------------------------------------------------------------------------------------------------------------------------------------------------------------------------------------------------------------------------------------------------------------------------------------------------------------------------------------------------------------------------------------------------------------------------------------------------------------------------------------------------------------------------------------------------------------------------------------------------------------------------------------------------------------------------------------------------------------------------------------------------------------------------------------------------------------------------------------------------------------------------------------------------------------------------------------------------------------------------------------------------------------------------------------------------------------------------------------------------------------------------------------------------------------------------------------------------------------------------------------------------------------------------------------------------------------------------------------------------------------------------------------------------------------------------------------------------------------------------------------------------------------------------------------------------------------------------------------------------------------------------------------------------------------------------------------------------------------------------------------------------------------------------------------------------------------------------------------------------------------------------------------------------------------------------------------------------------------------------------------------------------------------------------------------------------------------------------------------------------------------------------------------------------------------------------------------------------------------------------------------------------------|
|            | transduction                  |                        | <p>SCHIP1, RNF152, NRG3, ELMO1, SLC24A4, PDE10A, MECOM, STK32B, SHANK2, RAPGEF5, DOK5, DLG5, CHRM3, ARHGAP24, SPRED2, SLIT2, ROR1, ZNF675, AKT3, TRIM5, PSD3, RAP1GDS1, ERBB4, KANK1, ATRX, DMRT1, BID, RAP1A, TRIO, DUSP22, MYOM1, ABL2, MAP3K5, NOS1, RERG, HTR2C, PIK3C3, TRAF3, FGD4, ITGA1, MAPK9, PTGFR, ANK2, GRIN2B, ROBO1, PAK3, DGKB, GARNL3, NDFIP2, SGMS1, ITPR2, LEMD3, DGKK, PRKCE, ARHGEF11, PRKAA2, DGKI, DNMBP, EFHB, GRM5, NTN1, NR5A2, IGF1R, NLGN1, NOS1AP, INSR, CTNNAL1, CLEC16A, DOCK3, RELN, RASGRF2, STK38, ADCY9, DAPK1, VAV3, INPP5A, APP, PUM1, CCDC88A, PLCE1, PAK1, PPP1R13B, EPS8, GHR, RASGRF1, RIN2, USP7, STARD13, KL, PPP1R9A, TMEM117, SLAMF1, RGL1, TIAM1, DISC1, RALGPS1, ARHGAP42, EDAR, EGF, PDGFD, FYN, EPHA7, FHIT, STK3, S100B, NET1, ESR1, ARHGAP12, GRM1, PDE4D, PRKACB, PDE3A, DOCK4, MCTP2, WWOX, HUNK, CNKSR2, EPHB1, DOCK1, FLT1, CDC14B, HDAC4, STK36, PLCB4, SH3BP5, AKAP6, MARK2, ATF2, RBBP8, LRP2, RALGPS2, NTF3, FER, SNRK, CAMK4, MAPRE2, SGCD, TPTE, RAPGEF2, PRKCQ, PRKCH, DLC1, UBE3A, APC, AUTS2, EPHB2, ERC1, AGO3, MCTP1, MOB3B, NBN, DOCK2, NRP1, CDH13, DAB1, ALK, SEMA3A, SEMA3E, DCLK1, MAGI3, CDH2, SIPA1L2, RCAN2, ASB3, PIK3R3, MAP2K6, ARHGAP28, MTOR, STK38L, KSR1, RALGAPA2, FBLN1, BLM, FHL2, RGS7, STK32A, CD2AP, SPRED1, SIPA1L3, SCAI, NTRK3, RAPGEF4, BMPER, HMGA2, NSUN2, APIP, DOCK9, PPARA, RORA, PLCB1, PRKG1, RASGRP1, NLRC5, MAGI2, PLCL1, RALA, DOCK10, PRKD1, BCL2L1, RYR2, TGFA, DEPTOR, ZMYND11, RGS6, SRGAP3, AKAP13, RALGAPA1, SEMA5A, PRDM15, CHN1, NRG1, PRKCA, FMN2</p>                                                                                                                                                                                                                                                                                                                                                                                                                                                                                                                                                                                                                                                                                                                                                                                                                                                                                                                                                                    |
| GO:0051716 | cellular response to stimulus | 1.2191171450127982e-14 | <p>CD44, APBB2, PTPRR, ERG, PDE1C, SEMA4D, INIP, ZFYVE1, EVC, TEAD1, RPS6KA5, TAOK3, PRKCB, CPNE4, SLC8A1, ANKRD6, KCNC1, GPR55, DNAJC15, CD38, FBXO31, BCL2, CAMTA1, CHFR, THRB, CDC42EP3, GRIK2, IGSF11, SNX25, UNC13B, MAPK10, NCAM1, GNG12, IL6R, ZBTB20, SORBS2, SKAP2, CASP5, KCNK10, BRD4, GPR158, NDRG2, GRIP1, TLK1, DLGAP1, RCAN1, JAK2, BICD1, ABCG8, OTUD7A, TPTE2, KALRN, FGF12, CACNG2, NFAT5, TRHDE, ZNF536, LAMA1, GRIN2A, MAST4, NRXN1, ARID1B, ILLRAPL1, WDPCP, MAGI1, LAMA3, GBP4, ADCYAP1R1, GRID1, RPS6KA2, TDP1, SMOC2, ZDHHC17, KCNH1, CDCDC1, CACNA1C, BMF, WDR70, PNPLA3, FAM83B, CTNNA1, MYO9A, NTRK2, FOXN3, NLK, ITGBL1, RASGEF1B, AFAP1, TIAM2, IQCJ-SCHIP1, SMARCA4, RNF152, CNTN1, ZNRF3, ENPEP, NRG3, PTPRG, MC2R, BTBD11, ELMO1, SLC24A4, CABIN1, FBXL17, GAS2, GRIK3, PDE10A, STXBP4, MTPN, MT1HL1, SOX6, MECOM, STK32B, RGS12, SHANK2, RAPGEF5, UBE2E2, KCTD8, CHCHD6, UNC5D, NREP, GABRA5, DOK5, DLG5, SMARCA4, ATRNL1, CHRM3, CPE, ARHGAP24, SPRED2, IGHV10R15-9, SLIT2, PITPNC1, MYLK3, ROR1, GLP2R, ZNF675, CSNK2A1, DTNA, AKT3, CRB1, TRIM5, PSD3, ALPK2, HECW1, RAP1GDS1, ERBB4, KANK1, ATRX, DMRT1, BID, MACF1, MNAT1, RAP1A, TRIO, RAD51B, PTPRE, DUSP22, CHSY1, MYOM1, PSG8, EXT2, OR4C46, ABL2, MAP3K5, NOS1, ARPP21, ACACA, ABCG1, RGS3, MAML2, RERG, HTR2C, NEK4, SLC40A1, GABRR2, PIK3C3, TRAF3, CHD6, FGD4, ITGA1, CORO2B, ITGA8, GRIK4, ALDH1A2, GABRG1, MAPK9, ESRRG, PTGFR, IGHV10R21-1, CDH17, EYA1, MORC3, ANKS1B, P2RX6, HSF2BP, AKAP10, ANK2, PLA2G4A, SLC1A2, SUPT3H, SLIT3, GRIN2B, ROBO1, PAK3, DGKB, GARNL3, TNKS, NDFIP2, GABRA2, OVOL2, SGMS1, ITPR2, BRINP1, MLLT3, LEMD3, RNF138, GABPA, PRICKLE2, ITGB3BP, DGKK, TMEM67, PRKCE, PSG9, ARHGEF11, PRKAA2, PACRG, BBS2, IL1RAPL2, PTPRN2, GRIK1, SOX5, DSCAM, DGKI, RIN3, DNMBP, EFHB, KDM4C, SLC1A1, GRM5, EPHA6, NTN1, ARAP2, NR5A2, IGF1R, NLGN1, SHISA9, OR9Q1, SHROOM3, CFTR, CAMK1D, FLRT2, NOS1AP, PTPRO, MSRA, RBMS3, INSR, CTNNAL1, CLEC16A, ITGA9, EGLN3, ANK3, MORC2, GMD5, CNIH3, DOCK3, GPC6, RELN, RASGRF2, STK38, FBXO32, TNFR, ADCY9, CELF4, DAPK1, VAV3, INPP5A, VRK1, CNTN6, ACSM2B, APP, FBLN5, PUM1, CCDC88A, PLCE1, ADAM12, PAK1, GNAL, MITF, CACNA2D1, HCN1, PPP1R13B, TOP3A, CHRM5, NSMCE2, CXADR, EPS8, GPC5, TENM4, GHR, RASGRF1, RIN2, PRDM16, USP7, KIR2DL4, STARD13, KL, ALCAM, PPP1R9A, TMEM117, MICU1, LTBP1, SLAMF1, RGL1, INO80D, RARB, DIDO1, MYH13, WDR12, TIAM1, SORCS2, SLC39A12, DISC1, RALGPS1, ARHGAP42, CHAF1A, PIEZO2, SVEP1, EDAR, EGF, PDGFD, FYN, FAM3B, XRCC4, EPHA7, F</p> |

|            |                     |                        |                                                                                                                                                                                                                                                                                                                                                                                                                                                                                                                                                                                                                                                                                                                                                                                                                                                                                                                                                                                                                                                                                                                                                                                                                                                                                                                                                                                                                                                                                                                                                                                                                                                                                                                                                                                                                                                                                                                                                                                                                                                                                                                                                                                                                                                                  |
|------------|---------------------|------------------------|------------------------------------------------------------------------------------------------------------------------------------------------------------------------------------------------------------------------------------------------------------------------------------------------------------------------------------------------------------------------------------------------------------------------------------------------------------------------------------------------------------------------------------------------------------------------------------------------------------------------------------------------------------------------------------------------------------------------------------------------------------------------------------------------------------------------------------------------------------------------------------------------------------------------------------------------------------------------------------------------------------------------------------------------------------------------------------------------------------------------------------------------------------------------------------------------------------------------------------------------------------------------------------------------------------------------------------------------------------------------------------------------------------------------------------------------------------------------------------------------------------------------------------------------------------------------------------------------------------------------------------------------------------------------------------------------------------------------------------------------------------------------------------------------------------------------------------------------------------------------------------------------------------------------------------------------------------------------------------------------------------------------------------------------------------------------------------------------------------------------------------------------------------------------------------------------------------------------------------------------------------------|
|            |                     |                        | <p>HIT, NSG2, GRIA1, TRABD2B, SPIDR, STK3, CNOT7, MSR1, USP18, S100B, NET1, ESR1, ARHGAP12, GABRG3, SEL1L2, PLCXD3, GRM1, PDE4D, PRKACB, GNG2, PDE3A, RIMS1, POR, DOCK4, MCTP2, WWOX, HUNK, CNKSR2, FUT8, EPHB1, CREM, EFEMP1, GSG1L, DOCK1, FLT1, EXT1, EFNA5, NXN, CDC14B, C14ORF39, HDAC4, STK36, AMFR, PLCB4, FTO, SH3BP5, AKAP6, SORCS3, TENM3, MARK2, ATF2, RBBP8, GRID2, ZNF423, LRP2, SEMA6D, RALGPS2, NTF3, FER, SNRK, GLDC, CAMK4, MAPRE2, RAD51AP1, SGCD, TMEM108, RIC8B, GABRB3, TPTE, GRM7, RAPGEF2, MX1, IMMP2L, PRKCQ, GABRG2, CPS1, PRKCH, NRXN3, RHPN2, DLC1, NSG1, GABBR2, KCND2, UBE3A, GRIA4, IDE, TPH2, APC, MACROD2, INO80, AUTS2, TFF1, EPHB2, ERC1, AGO3, MCTP1, MOB3B, RYR3, NBN, ADAMTS18, RGM, CTNND2, SETD2, PKP1, DOCK2, NRP1, CDH13, RFC3, DAB1, RFTN1, ALK, EVC2, LDLRAD4, SEMA3A, SEMA3E, MGAT5, MYEF2, DCLK1, MAGI3, KIF16B, NRIP1, CDH2, ARID5B, SIPA1L2, RCAN2, LRRRC69, TENM2, VPS41, SYCP1, ASB3, HDAC9, PIK3R3, MAP2K6, FSTL4, ARHGAP28, MTOR, STK38L, KSR1, RALGAP2, RORB, GABRB1, FBLN1, ST8SIAL, BLM, FHL2, NEU3, NCAPG2, RGS7, STK32A, CD2AP, USP25, SPRED1, SIPA1L3, ADAM10, FLNB, SCAI, PTPRT, TRERF1, SLC24A2, GLI3, NTRK3, RXFP1, FBN1, CHKA, RAB31, RAPGEF4, BMPER, PDE1A, HMGA2, NSUN2, DEFA3, PTPRK, SORCS1, TBC1D4, SYT1, APIP, DPF3, NPHP4, DOCK9, DLG2, PPP1R12B, PPARA, PLXNA2, PTPRD, RORA, SHISA6, SCARA5, PLCB1, PRKG1, RASGRP1, ELAVL4, NLRC5, MAGI2, PLCL1, ABI1, PXDNL, ASIC2, RALA, DOCK10, TRPM1, CACNG3, PRKD1, BCL2L1, HDAC2, TNN, RYR2, SEMA3D, TGFA, PRLR, TBX20, PTPRA, OR11G2, MTMR2, ATF6, IL16, DEPTOR, BACH1, ROBO2, IFT81, ZMYND11, RGS6, SRGAP3, AKAP13, NEDD9, ENPP1, PCP4, RIMS2, STAC, EYA4, RALGAP1, DLGAP2, SEMA5A, PRDM15, OR4N2, BCL11A, DCC, CHN1, VPS13C, PARD3, NRG1, PRKCA, FMN2, SEMA3C, FANCB, CSF2RB, PCNT, ST18</p>                                                                                                                                                                                                                                                                                                                                                                                                                                                       |
| GO:0007165 | signal transduction | 1.7585164230371407e-14 | <p>CD44, APBB2, PTPRR, ERG, PDE1C, SEMA4D, INIP, EVC, TEAD1, RPS6KA5, TAOK3, PRKCB, SLC8A1, ANKRD6, GPR55, CD38, FBXO31, BCL2, CAMTA1, CHFR, THRB, CDC42EP3, GRIK2, IGSF11, SNX25, UNC13B, MAPK10, NCAM1, GNG12, IL6R, SORBS2, SKAP2, CASP5, KCNK10, BRD4, GPR158, NDRG2, GRIP1, TLK1, DLGAP1, RCAN1, JAK2, BICD1, ABCG8, OTUD7A, TPTE2, KALRN, FGF12, CACNG2, NFAT5, TRHDE, ZNF536, LAMA1, GRIN2A, MAST4, NRXN1, IL1RAPL1, WPCP, MAGI1, LAMA3, ADCYAP1R1, GRID1, RPS6KA2, SMOC2, ZDHHC17, KCNH1, CDC1, CACNA1C, BMF, FAM83B, CTNNA1, MYO9A, NTRK2, FOXN3, NLK, ITGBL1, RASGEF1B, AFAP1, TIAM2, IQCJ-SCHIP1, SMARCA4, RNF152, CNTN1, ZNRF3, ENPEP, NRG3, PTPRG, MC2R, BTBD11, ELMO1, SLC24A4, CABIN1, FBXL17, GAS2, GRIK3, PDE10A, STXBP4, MECOM, STK32B, RGS12, SHANK2, RAPGEF5, KCTD8, UNC5D, NREP, GABRA5, DOK5, DLG5, ATRNL1, CHRM3, CPE, ARHGAP24, SPRED2, IGHV1OR15-9, SLIT2, PITPNC1, ROR1, GLP2R, ZNF675, CSNK2A1, DTNA, AKT3, TRIM5, PSD3, ALPK2, HECW1, RAPIGDS1, ERBB4, KANK1, ATRX, DMRT1, BID, MACF1, RAP1A, TRIO, PTPRE, DUSP22, CHSY1, MYOM1, PSG8, EXT2, OR4C46, ABL2, MAP3K5, NOS1, RGS3, MAML2, RERG, HTR2C, GABRR2, PIK3C3, TRAF3, FGD4, ITGA1, ITGA8, GRIK4, ALDH1A2, GABRG1, MAPK9, ESRRG, PTGFR, IGHV1OR21-1, CDH17, EYA1, ANKS1B, P2RX6, AKAP10, ANK2, SLIT3, GRIN2B, ROBO1, PAK3, DGKB, GARNL3, TNKS, NDFIP2, GABRA2, OVOL2, SGMS1, ITPR2, MLLT3, LEMD3, RNF138, PRICKLE2, ITGB3BP, DGKK, PRKCE, PSG9, ARHGEF11, PRKAA2, BBS2, IL1RAPL2, GRIK1, DSCAM, DGKI, RIN3, DNMBP, EFHB, KDM4C, SLC1A1, GRM5, EPHA6, NTN1, ARAP2, NR5A2, IGF1R, NLGN1, SHISA9, OR9Q1, FLRT2, NOS1AP, PTPRO, RBMS3, INSR, CTNNA1, CLEC16A, ITGA9, ANK3, GMDS, CNIH3, DOCK3, GPC6, RELN, RASGRF2, STK38, ADCY9, CELF4, DAPK1, VAV3, INPP5A, VRK1, CNTN6, APP, PUM1, CCDC88A, PLCE1, ADAM12, PAK1, GNAL, MITF, PPP1R13B, CHRM5, EPS8, GPC5, TENM4, GHR, RASGRF1, RIN2, PRDM16, USP7, KIR2DL4, STARD13, KL, ALCAM, PPP1R9A, TMEM117, LTBP1, SLAMF1, RGL1, RARB, DIDO1, WDR12, TIAM1, SORCS2, SLC39A12, DISC1, RALGPS1, ARHGAP42, SVEP1, EDAR, EGF, PDGFR, FYN, FAM3B, EPHA7, FHIT, NSG2, GRIA1, TRABD2B, STK3, CNOT7, USP18, S100B, NET1, ESR1, ARHGAP12, GABRG3, PLCXD3, GRM1, PDE4D, PRKACB, GNG2, PDE3A, RIMS1, POR, DOCK4, MCTP2, WWOX, HUNK, CNKSR2, FUT8, E</p> |

|            |                                  |                        |                                                                                                                                                                                                                                                                                                                                                                                                                                                                                                                                                                                                                                                                                                                                                                                                                                                                                                                                                                                                                                                                                                                                                                                                                                                                                                                                                    |
|------------|----------------------------------|------------------------|----------------------------------------------------------------------------------------------------------------------------------------------------------------------------------------------------------------------------------------------------------------------------------------------------------------------------------------------------------------------------------------------------------------------------------------------------------------------------------------------------------------------------------------------------------------------------------------------------------------------------------------------------------------------------------------------------------------------------------------------------------------------------------------------------------------------------------------------------------------------------------------------------------------------------------------------------------------------------------------------------------------------------------------------------------------------------------------------------------------------------------------------------------------------------------------------------------------------------------------------------------------------------------------------------------------------------------------------------|
|            |                                  |                        | PHB1, CREM, EFEMP1, GSG1L, DOCK1, FLT1, EXT1, EFNA5, NXN, CDC14B, HDAC4, STK36, AMFR, PLCB4, SH3BP5, AKAP6, SORCS3, TENM3, MARK2, ATF2, RBBP8, GRID2, ZNF423, LRP2, SEMA6D, RALGPS2, NTF3, FER, SNRK, CAMK4, MAPRE2, SGCD, TMEM108, RIC8B, GABRB3, TPTE, GRM7, RAPGEF2, MX1, PRKCQ, GABRG2, PRKCH, NRXN3, RHPN2, DLC1, NSG1, GABBR2, UBE3A, GRIA4, IDE, APC, AUTS2, TFF1, EPHB2, ERC1, AGO3, MCTP1, MOB3B, NBN, ADAMTS18, RGM, CTNND2, PKP1, DOCK2, NRP1, CDH13, DAB1, RFTN1, ALK, EVC2, LDLRAD4, SEMA3A, SEMA3E, MGAT5, DCLK1, MAGI3, KIF16B, CDH2, ARID5B, SIPA1L2, RCAN2, LRRC69, TENM2, ASB3, PIK3R3, MAP2K6, FSTL4, ARHGAP28, MTOR, STK38L, KSR1, RALGAPA2, RORB, GABRB1, FBLN1, BLM, FHL2, NEU3, NCAPG2, RGS7, STK32A, CD2AP, SPRED1, SIPA1L3, ADAM10, FLNB, SCARF1, PTPRT, TRERF1, SLC24A2, GLI3, NTRK3, RXFP1, FBN1, RAPGEF4, BMPER, PDE1A, HMGA2, NSUN2, DEFA3, PTPRK, SORCS1, APIP, NPHP4, DOCK9, PPP1R12B, PPARA, PLXNA2, PTPRD, RORA, SHISA6, PLCB1, PRKG1, RASGRP1, NLRC5, MAGI2, PLCL1, ABI1, ASIC2, RALA, DOCK10, TRPM1, CACNG3, PRKD1, BCL2L1, HDAC2, TNN, RYR2, SEMA3D, TGFA, PRLR, TBX20, PTPRA, OR11G2, MTMR2, ATF6, IL16, DEPTOR, ROBO2, IFT81, ZMYND11, RGS6, SRGAP3, AKAP13, NEDD9, ENPP1, PCP4, RIMS2, STAC, EYA4, RALGAPA1, DLGAP2, SEMA5A, PRDM15, OR4N2, DCC, CHN1, PARD3, NRG1, PRKCA, FMN2, SEMA3C, CSF2RB, PCNT, ST18 |
| GO:0034329 | cell junction assembly           | 3.2545595967897345e-14 | SEMA4D, BCL2, CDH8, NEGR1, EPB41L3, CDH11, NRXN1, IL1RAPL1, WDPCP, CTNNA1, MYO9A, NTRK2, OCLN, SHANK2, DLG5, ERBB4, MACF1, RAP1A, DUSP22, CORO2B, PEAK1, CDH18, ANK2, GABRA2, IL1RAPL2, DSCAM, SDK1, NTN1, NLGN1, CNTNAP2, FLRT2, PTPRO, CDH12, TBCD, GPC6, APP, LRFN5, CLSTN2, FMN1, EPHA7, CNTN5, EPHB1, EFNA5, TLN2, LINGO2, GRID2, FER, GABRB3, RAPGEF2, KIRREL3, GABRG2, PRKCH, NRXN3, DLC1, APC, EPHB2, PDLIM5, CTNND2, PKP1, NRP1, CDH2, NTRK3, PTPRK, DNMT3, SYNDIG1, NPHP4, PTPRD, CDH9, ASIC2, PTPRA, VCL, ROBO2, PARD3, NRG1, PRKCA                                                                                                                                                                                                                                                                                                                                                                                                                                                                                                                                                                                                                                                                                                                                                                                                     |
| GO:0007267 | cell-cell signaling              | 9.192089330293162e-14  | SYN3, PRKCB, ANKRD6, CD38, GRIK2, IGSF11, UNC13B, CDH8, NDRG2, APBA2, DLGAP1, JAK2, KALRN, FGF12, CACNG2, BTBD9, TRHDE, CDH11, GRIN2A, NRXN1, IL1RAPL1, GRID1, RPS6KA2, CACNA1C, AMPH, EXOC4, NTRK2, NLK, SMARCA4, ZNRF3, ENPEP, NRG3, GRIK3, CACNB2, STXBP4, SHANK2, GABRA5, CHRM3, CPE, ROR1, CSNK2A1, DTNA, CRB1, ALPK2, HECW1, KANK1, MACF1, RAP1A, NOS1, HTR2C, CACNA1E, CNTN4, GABRR2, GRIK4, GABRG1, SV2B, P2RX6, ANK2, PLA2G4A, SLC1A2, GRIN2B, DGKB, TNKS, GABRA2, FCHSD2, MLLT3, RNF138, PRICKLE2, PRKCE, PSG9, PRKAA2, PTPRN2, GRIK1, DGKI, SLC1A1, GRM5, NLGN1, SHISA9, CFTR, PTPRO, RBMS3, SV2C, GPC6, RELN, RASGRF2, TNFR, CELF4, APP, CCDC88A, MITF, CACNA2D1, HCN1, CHRM5, CXADR, GPC5, RASGRF1, LRRC4C, PPP1R9A, ZZEF1, LTBP1, CLSTN2, TIAM1, SORCS2, DISC1, EGF, FYN, FAM3B, RIMBP2, GRIA1, TRABD2B, STK3, S100B, GABRG3, GRM1, ERC2, RIMS1, MCTP2, WWOX, EPHB1, SNAP29, EXT1, EFNA5, NXN, AMFR, PLCB4, SORCS3, MARK2, GRID2, ZNF423, NTF3, NTNG1, TMEM108, GABRB3, GRM7, RAPGEF2, GABRG2, NRXN3, NSG1, GABBR2, PCND2, APC, EPHB2, ERC1, MCTP1, CTNND2, PACSIN2, NRP1, CDH2, MAP2K6, GABRB1, SH3KBP1, CADPS, ADAM10, LRFN2, SLC24A2, GLI3, RAPGEF4, HMGA2, SYT1, NPHP4, DLG2, PTPRD, SHISA6, PLCB1, ELAVL4, MAGI2, PLCL1, TSHZ3, ASIC2, CACNG3, TNN, RYR2, PTPRA, MTMR2, MYRIP, UNC13C, RIMS2, DLGAP2, SEMA5A, PRDM15, DCC, NRG1 |
| GO:0050789 | regulation of biological process | 1.4226054388158902e-13 | CD44, SAMD4A, KCNMA1, C10ORF90, PKNOX2, ZHX3, APBB2, PTPRR, SCARF8, RTN1, ERG, PARN, PDE1C, SEMA4D, INIP, MED13L, EVC, TEAD1, NFIA, SYN3, RPS6KA5, TAOK3, PRKCB, EIF4G3, A2M, SLC8A1, ANKRD6, KCNC1, GPR55, DNAJC15, SIAH3, CD38, ZNF257, FBXO31, PIWIL3, TRAPPC9, BCL2, CAMTA1, SAMSIN1, CHFR, THADA, COL18A1, TOX3, THRB, DNAH11, ZSCAN5C, RAG1, CDC42EP3, GRIK2, IGSF11, SNX25, UNC13B, MAPK10, NCAM1, KDM4B, GNG12, IL6R, KCNQ5, CDH8, ZBTB20, SCN11A, ATP10A, SORBS2, SKAP2, HS1BP3, KCNJ6, CASP5, KCNK10, BRD4, GPR158, ZNF568, NDRG2, GRIP1, APBA2, TLK1, ASTN2, TANC2, CSMD3, DLGAP1, RCAN1, NTN4, JAK2, TM9SF4, BICD1, MIR17HG, ABCG8, OTUD7A, TPTE2, KALRN, USH2A, NEGR1, FGF12, CACNG2, BTBD9, NFAT5, FLI1, TRHDE, ZNF536, EPB41L3, LAMA1, PARVB, CDH11, ZBTB7C, GRIN2A, MAST4, NRXN1, ARID1B, IL1RAPL1, WDPCP, MAGI1, LAMA3, ADCYAP1R1, CTDP1, DPP6, GRID1, RPS6KA2, SMOC2, ZDHHC                                                                                                                                                                                                                                                                                                                                                                                                                                                      |



|  |  |                                                                                                                                                                                                                                                                                                                                                                                                                                                                                                                                                                                                                                                                                                                                                                                                                                                                                                                                                                                                                                                                                                                                                                                                                                                                                                                                                                                                                                                                                                                                                                                                                                                                                                                                                                                                                                                                                                                                                                                                                                                                                                                                                                                                                                                                                                                                                                                                                                                                                                                                                                                                                                                                                                                                                                                                                                                                                                                                                                                                                                                                                                                                                                                                                                                                                                                                                                                                                                                                                                                                                                                                                                                                                                                                                                                                                                                                                                                                                                                                                                                                                                                                                |
|--|--|------------------------------------------------------------------------------------------------------------------------------------------------------------------------------------------------------------------------------------------------------------------------------------------------------------------------------------------------------------------------------------------------------------------------------------------------------------------------------------------------------------------------------------------------------------------------------------------------------------------------------------------------------------------------------------------------------------------------------------------------------------------------------------------------------------------------------------------------------------------------------------------------------------------------------------------------------------------------------------------------------------------------------------------------------------------------------------------------------------------------------------------------------------------------------------------------------------------------------------------------------------------------------------------------------------------------------------------------------------------------------------------------------------------------------------------------------------------------------------------------------------------------------------------------------------------------------------------------------------------------------------------------------------------------------------------------------------------------------------------------------------------------------------------------------------------------------------------------------------------------------------------------------------------------------------------------------------------------------------------------------------------------------------------------------------------------------------------------------------------------------------------------------------------------------------------------------------------------------------------------------------------------------------------------------------------------------------------------------------------------------------------------------------------------------------------------------------------------------------------------------------------------------------------------------------------------------------------------------------------------------------------------------------------------------------------------------------------------------------------------------------------------------------------------------------------------------------------------------------------------------------------------------------------------------------------------------------------------------------------------------------------------------------------------------------------------------------------------------------------------------------------------------------------------------------------------------------------------------------------------------------------------------------------------------------------------------------------------------------------------------------------------------------------------------------------------------------------------------------------------------------------------------------------------------------------------------------------------------------------------------------------------------------------------------------------------------------------------------------------------------------------------------------------------------------------------------------------------------------------------------------------------------------------------------------------------------------------------------------------------------------------------------------------------------------------------------------------------------------------------------------------------|
|  |  | <p>17, KCNHL1, DCDC1, CACNA1C, BMF, EXOC4, WDR70, FAM83B, CTNNA1, MYO9A, NTRK2, FOXN3, OCLN, NLK, ITGBL1, RASGEF1B, AFAP1, TIAM2, MYT1L, SRGAP2B, IQCJ-</p> <p>SCHIP1, SMARCA4, RNF152, CNTN1, ZNRF3, PALMD, MEOX2, TTC39B, ENPEP, PLEKHB2, GLIS3, NRG3, PTPRG, MC2R, BTBD11, ELMO1, SLC24A4, CABIN1, FBXL17, GAS2, GRIK3, CACNB2, PDE10A, NUMB, STXBP4, MED15, MTPN, SOX6, MECOM, PDE4DIP, STK32B, RGS12, SHANK2, RAPGEF5, UBE2E2, KCTD8, UNC5D, ZNF567, NREP, GABRA5, DOK5, DLG5, CFDP1, SMARCAD1, ZIM3, ATRNL1, CHRM3, CPE, ARHGAP24, SPRED2, IGHV1OR15-</p> <p>9, SLIT2, PITPNC1, MYLK3, ABCA5, ROR1, GLP2R, SLC4A4, ZNF675, CSNK2A1, DTNA, AKT3, KMT2C, KCNE4, TRIM5, KCNS3, PSD3, ALPK2, ABCA13, HECW1, RAP1GDS1, AFF3, ERBB4, KANK1, ATRX, DMRT1, BID, MACF1, MNAT1, TAF4B, RAP1A, TRIO, CTNBNB1, RAD51B, PTPRE, DU SP22, CHSY1, MYOM1, PSG8, EXT2, ZSCAN30, OR4C46, ABL2, PSMA1, MAP3K5, NOS1, ABCG1, RGS3, MAML2, RERG, HTR2C, NEK4, CACNA1E, CTIF, CNTN4, TBC1D5, SAMD13, SLC40A1, SLC03A1, GABRR2, PIK3C3, TRAF3, SND1, CHD6, FGD4, ETS2, ITGA1, TCF12, ZNF721, HIRA, CORO2B, ITGA8, GRIK4, RBM19, RUNX1, KIR3DL2, ALDH1A2, GABRG1, TSHZ2, MAPK9, ESRRG, PTGFR, IGHV1OR21-</p> <p>1, FAM171A1, ZNF595, CDH17, PEAK1, EYA1, MORC3, ANKS1B, P2RX6, AKAP10, SPOCK3, FRMD6, PLS1, SPON1, ANK2, PLA2G4A, SLC1A2, ZBTB16, SUPT3H, SLIT3, GRIN2B, ZNF518A, PHC2, ROBO1, ZNF578, EGLAM, PAK3, DGKB, GARNL3, DPH6, EBF1, TNKS, KLF12, NDFIP2, GABRA2, MDM1, OVOL2, FCHSD2, SGMS1, ITPR2, BRINP1, MLLT3, BCL2L13, LEMD3, KHDRBS2, RNF138, CHODL, GABPA, PRICKLE2, ITGB3BP, CACNA2D3, DGKK, TMEM67, PRKCE, GLIS1, PSG9, ARHGEF11, PRKAA2, PACRG, BBS2, IL1RAPL2, EDIL3, CDYL2, HIVEP2, KCN8, GRIK1, SOX5, DSCAM, DGKI, RIN3, ANKFN1, DNMBP, EFHB, KDM4C, DCUN1D4, SK1, SLC1A1, GRM5, EPHA6, NTN1, ARAP2, NR5A2, LDB2, IGF1R, SPTB, SNX30, NLGN1, SHISA9, OR9Q1, SHROOM3, JAM2, ALX4, CORIN, CNTNAP2, MAP2, KCNIP4, CFTR, CAMK1D, FLRT2, MLLT10, NOS1AP, PTPRO, NKAIN2, CD96, RBMS3, INSR, COBL, CTNNAL1, CLEC16A, PHF20L1, ITGA9, MTRF1, CATSPER2, EGLN3, CUX1, ANK3, MORC2, GMDS, CNH3, DOCK3, TBCD, GPC6, RELN, RASGRF2, TRPS1, ADAMTS5, STK38, AOA, FBXO32, CDH4, TNFR, ADCY9, DPP10, CELF4, DAPK1, VAV3, INPP5A, ZNF600, VRK1, ZNF678, CNTN6, CLIC6, ZNF420, APP, FBLN5, PUM1, CCDC88A, ARNT2, KCTD1, RNLS, SPOCK1, HPSE2, PLCE1, ADAM12, PAK1, GNAL, MITF, IGF2BP3, CACNA2D1, ADCK1, HCN1, PPP1R13B, CHRM5, NSMCE2, ZNF208, FRY, CXADR, EPS8, LRFN5, UTRN, GPC5, TENM4, PRR16, TSPAN13, GHR, DUX4, RIPK4, RASGRF1, RIN2, PRDM16, FRMD5, RNF217, USP7, RBFOX1, MEIS2, KIR2DL4, STARD13, SCP2, KLL, LRRC4C, ALCAM, PPP1R9A, AVEN, TMEM117, ADAMTS16, TASP1, MICU1, ZZEF1, LTBP1, SLAMF1, RGL1, NKAIN3, BACE2, INO80D, CLSTN2, RARB, DIDO1, WDR12, TCF4, TIAM1, FOCAD, PBX1, PHACTR1, MLIP, SORCS2, PRIM2, SLC39A12, DISC1, FMN1, RALGPS1, ARHGAP42, ZFPM2, SVEP1, ASAP1, PCBP3, FRMPD4, EDAR, EGF, PDGFR, FYN, FAM3B, KCND3, EPHA7, FHIT, NSG2, GRIA1, ZNF627, TRABD2B, SPIDR, STK3, CNOT7, MSR1, PSIP1, USP18, S100B, NET1, TOX, ESR1, ARHGAP12, GABRG3, PLCXD3, KCNAB1, GRM1, PDE4D, ERC2, PRKACB, GNG2, PDE3A, RIMS1, POR, L3MBTL4, DOCK4, ATP6V1E1, FRMD4A, MCTP2, WWOX, HUNK, CNKSR2, FUT8, EPHB1, SSBP2, CREM, CTTNBP2, FHOD3, EFEMP1, TNRC6B, AJAP1, ABCC9, GSG1L, HERC1, DOCK1, PARP15, FLT1, EXT1, EFNA5, NXN, CDC14B, C14ORF39, HDAC4, ZNF717, STK36, TRPC5, AMFR, PLCB4, ATP9A, FTO, PPFIA2, SH3BP5, AKAP6, SORCS3, POU6F2, TENM3, LINGO2, MARK2, ATF2, ZNF880, RBBP8, GRID2, ZNF423, LRP2, SEMA6D, ZNF573, C2, RALGPS2, NTF3, FER, SNRK, SUS4, CAMK4, CELF2, TP53I11, NTNG1, MAPRE2, ISX, RAD51AP1, SGCD, TMEM108, RIC8B, GABRB3, TPTE, GRM7, SLC39A8, RAPGEF2, NAV3, MX1, PLGRKT, ZNF615, GTF2I, ATXN1, PRKCQ, GABRG2, PRKCH, NRXN3, RHPN2, RABGAP1L, DLC1, NSG1, GABBR2, KCND2, ATP8A2, SLC24A3, UBE3A, GRIA4, IDE, APC, ZBTB25, INO80, AUTS2, TFF1, EPHB2, SCAF4, ERC1, ZNF850, PDLIM5, AGO3, C9, MCTP1, MOB3B, RYR3, NBAS, PRTG, NBN, ADAMTS18, RGM, CTNND2, SETD2, PACSIN2, PKP1, DOCK2, NUP214, SDCCAG8, FLVCR1, NRP1, CDH13, RFC3, ZNF879, DACH1, TRDN, SLC2A13, ZNF397, DAB1, RFTN1, ALK, EVC2, LDLRAD4, SEMA3A, SE</p> |
|--|--|------------------------------------------------------------------------------------------------------------------------------------------------------------------------------------------------------------------------------------------------------------------------------------------------------------------------------------------------------------------------------------------------------------------------------------------------------------------------------------------------------------------------------------------------------------------------------------------------------------------------------------------------------------------------------------------------------------------------------------------------------------------------------------------------------------------------------------------------------------------------------------------------------------------------------------------------------------------------------------------------------------------------------------------------------------------------------------------------------------------------------------------------------------------------------------------------------------------------------------------------------------------------------------------------------------------------------------------------------------------------------------------------------------------------------------------------------------------------------------------------------------------------------------------------------------------------------------------------------------------------------------------------------------------------------------------------------------------------------------------------------------------------------------------------------------------------------------------------------------------------------------------------------------------------------------------------------------------------------------------------------------------------------------------------------------------------------------------------------------------------------------------------------------------------------------------------------------------------------------------------------------------------------------------------------------------------------------------------------------------------------------------------------------------------------------------------------------------------------------------------------------------------------------------------------------------------------------------------------------------------------------------------------------------------------------------------------------------------------------------------------------------------------------------------------------------------------------------------------------------------------------------------------------------------------------------------------------------------------------------------------------------------------------------------------------------------------------------------------------------------------------------------------------------------------------------------------------------------------------------------------------------------------------------------------------------------------------------------------------------------------------------------------------------------------------------------------------------------------------------------------------------------------------------------------------------------------------------------------------------------------------------------------------------------------------------------------------------------------------------------------------------------------------------------------------------------------------------------------------------------------------------------------------------------------------------------------------------------------------------------------------------------------------------------------------------------------------------------------------------------------------------------|

|            |                      |                        |                                                                                                                                                                                                                                                                                                                                                                                                                                                                                                                                                                                                                                                                                                                                                                                                                                                                                                                                                                                                                                                                                                                                                                                                                                                                                                                                                                                                                                                                                                                                                                                                                                                                                                                                                                                                                                                                                                                                                                                                                                                                                                                                                                                                                                                                                                                                                                                                                                                                                                                                                                                                             |
|------------|----------------------|------------------------|-------------------------------------------------------------------------------------------------------------------------------------------------------------------------------------------------------------------------------------------------------------------------------------------------------------------------------------------------------------------------------------------------------------------------------------------------------------------------------------------------------------------------------------------------------------------------------------------------------------------------------------------------------------------------------------------------------------------------------------------------------------------------------------------------------------------------------------------------------------------------------------------------------------------------------------------------------------------------------------------------------------------------------------------------------------------------------------------------------------------------------------------------------------------------------------------------------------------------------------------------------------------------------------------------------------------------------------------------------------------------------------------------------------------------------------------------------------------------------------------------------------------------------------------------------------------------------------------------------------------------------------------------------------------------------------------------------------------------------------------------------------------------------------------------------------------------------------------------------------------------------------------------------------------------------------------------------------------------------------------------------------------------------------------------------------------------------------------------------------------------------------------------------------------------------------------------------------------------------------------------------------------------------------------------------------------------------------------------------------------------------------------------------------------------------------------------------------------------------------------------------------------------------------------------------------------------------------------------------------|
|            |                      |                        | MA3E, MGAT5, MALRD1, MYEF2, DCLK1, MAGI3, KIF16B, NRIP1, CDH2, ARID5B, SIPA1L2, CCNG2, RCAN2, LRRC69, TENM2, TANC1, SERPINB7, VPS41, SYCP1, ZNF407, ASB3, HDAC9, PIK3R3, MAP2K6, FSTL4, ARHGAP28, MTOR, STK38L, KSR1, RALGAPA2, RORB, GABRB1, FBLN1, ST8SIA1, BLM, SH3KBP1, FHL2, CADPS, NEU3, NCAPG2, RGS7, STK32A, CD2AP, ZFP30, USP25, SPRED1, SIPA1L3, ADAM10, DRAM1, KANSL1, LRFN2, FLNB, SCAI, PAPP2, PTPRT, TRERF1, SLC24A2, GLI3, NTRK3, RXFP1, FBN1, RAB31, CTNNA3, VPS13D, ABHD17C, ZNF292, TBX15, RAPGEF4, BMPER, ANKRD31, ZNF521, PDE1A, TMPRSS2, ATF7IP, HMGA2, MX2, CREB5, NSUN2, DEFA3, PTPRK, SORCS1, TBC1D4, DNM3, SYT1, APIP, SYNDIG1, ASXL3, DPF3, NPHP4, DOCK9, PPP1R12B, SACS, PPARA, PLXNA2, PTPRD, RORA, SHISA6, PLCB1, LOXL2, BPTF, PRKG1, RASGRP1, ELAVL4, NLRC5, STXBP6, MXI1, TTC28, MAGI2, NELL1, PLCL1, ABI1, TSHZ3, ASIC2, RALA, DOCK10, TRPM1, CACNG3, NECB1, PRKD1, ATP8A1, TNFAIP8, BCL2L1, HDAC2, ETS1, MRPS27, TNN, RYR2, SEMA3D, LDLRAD3, BANP, TGFA, PRLR, TBX20, PTPRA, FAT3, OR11G2, MTMR2, KCNH5, ATF6, IL16, VCL, DEPTOR, BACH1, ATAT1, ROBO2, EWSR1, IFT81, ZMYND11, RGS6, SRGAP3, AKAP13, WDR41, NEDD9, MYRIP, ENPP1, UNC13C, PCP4, RIMS2, STAC, SCN8A, RAB27A, EYA4, RALGAPA1, L3MBTL3, DLGAP2, POMT2, HIVEP3, CLIP1, SEMA5A, CABLES1, PRDM15, OR4N2, BCL11A, DCC, ZNF112, CTNNA2, PVT1, CHN1, ETV6, VPS13C, KCNJ15, PARD3, NRG1, CAST, FANK1, ZNF845, NPAS3, PRKCA, FMN2, SEMA3C, FANCB, CSF2RB, PCNT, ST18, TOP1                                                                                                                                                                                                                                                                                                                                                                                                                                                                                                                                                                                                                                                                                                                                                                                                                                                                                                                                                                                                                                                                                                                                              |
| GO:0050896 | response to stimulus | 2.7132269572563334e-13 | CD44, KCNMA1, APBB2, PTPRR, ERG, PDE1C, SEMA4D, INIP, ZFYVE1, EVC, TEAD1, RPS6KA5, TAOK3, PRKCB, A2M, TRPM6, CPNE4, SLC8A1, ANKRD6, KCNC1, GPR55, DNAJC15, CD38, FBXO31, BCL2, CAMTA1, SAMSN1, CHFR, RSRC1, THRB, B3GALT5, RAG1, CDC42EP3, GRIK2, IGSF11, SNX25, UNC13B, MAPK10, NCAM1, GNG12, IL6R, CDH8, ZBTB20, SCN11A, SORBS2, SKAP2, GOT2, CASP5, KCNK10, BRD4, GPR158, NDRG2, GRIP1, TLK1, DLGAP1, RCAN1, JAK2, TM9SF4, BICD1, ABCG8, OTUD7A, TPTE2, KALRN, USH2A, FGF12, CACNG2, NFAT5, TRHDE, ZNF536, LAMA1, GRIN2A, MAST4, NRXN1, ARID1B, IL1RAPL1, WDCPC, MAGI1, LAMA3, GBP4, ADCYAP1R1, CTDP1, GRID1, RPS6KA2, TDP1, SMOCC2, ZDHHC17, KCNH1, HLCS, DCDC1, CACNA1C, BMF, WDR70, PNPLA3, BBS9, FAM83B, CTNNA1, MYO9A, NTRK2, FOXN3, OCLN, NLK, ITGBL1, RASGEF1B, AFAP1, TIAM2, IQCJ-SCHIP1, SMARCA4, RNF152, CNTN1, ZNRF3, ENPEP, NRG3, PTPRG, MC2R, BTBD11, ELMO1, SLC24A4, CABIN1, FBXL17, GAS2, GRIK3, PDE10A, STXBP4, MTPN, MT1HL1, SOX6, MECOM, TRPM3, STK32B, RGS12, SHANK2, RAPGEF5, UBE2E2, KCTD8, CHCHD6, UNC5D, NREP, GABRA5, DOK5, DLG5, SMARCD1, ATRNL1, CHRM3, CPE, ARHGAP24, SPRED2, IGHV1OR15-9, SLIT2, PITPNC1, MYLK3, ROR1, GLP2R, ADAMTSL1, ZNF675, CSNK2A1, DTNA, AKT3, CRB1, TRIM5, PSD3, ALPK2, HECW1, RAP1GDS1, AFF3, ERBB4, KANK1, GPHN, ATRX, DMRT1, BID, MACF1, MNAT1, RAP1A, TRIO, RAD51B, PTPRE, MYO3B, DUSP22, CHSY1, MYOM1, PSG8, EXT2, OR4C46, ABL2, PSM1, MAP3K5, NOS1, ARPP21, ACACA, ABCG1, RGS3, MAML2, RERG, HTR2C, CCDC141, NEK4, CNTN4, TBC1D5, SLC40A1, GABRR2, PIK3C3, TRAF3, CHD6, HMCN1, FGD4, ITGA1, TCF12, CORO2B, ITGA8, GRIK4, KIR3DL2, ALDH1A2, GABRG1, MAPK9, ESRRG, PTGFR, IGHV1OR21-1, CDH17, EYA1, MORC3, ANKS1B, P2RX6, HSF2BP, AKAP10, ANK2, PLA2G4A, SLC1A2, SUPT3H, SLIT3, GRIN2B, ROBO1, PAK3, DGKB, GARNL3, TNKS, NDFIP2, GABRA2, OVOL2, SGMS1, ITPR2, BRINP1, MLLT3, LEMD3, RNF138, GABPA, PRICKLE2, ITGB3BP, DGKK, TMEM67, PRKCE, PSG9, ARHGEF11, PRKAA2, CD163, PACRG, BBS2, IL1RAPL2, PTPRN2, MYO3A, GRIK1, SOX5, DSCAM, DGKI, RIN3, REG4, ANKFN1, DNMBP, EFHB, KDM4C, SDK1, SLC1A1, GRM5, EPHA6, NTN1, ARAP2, NR5A2, IGFLR, NLGN1, SHISA9, OR9Q1, SHROOM3, CNTNAP2, CFTF, CAMK1D, FLRT2, NOS1AP, PTPRO, MSRA, CD96, RBMS3, INSR, CTNNA1, CLEC16A, ITGA9, EGLN3, ANK3, MORC2, GMDS, CNIH3, DOCK3, GPC6, RELN, RASGRF2, ADAMTS5, STK38, AOA, FBXO32, CDH4, TNFR, ADCY9, CELF4, DAPK1, VAV3, INPP5A, VRK1, CNTN6, ACSM2B, APP, FBLN5, PUM1, CCDC88A, ARNT2, RNLS, PLCE1, ADAM12, PAK1, GNAI, MITF, CACNA2D1, HCN1, PPP1R13B, TOP3A, CHRM5, NSMCE2, CXADR, EPS8, LRFN5, GPCC5, TENM4, GHR, RASGRF1, RIN2, PRDM16, USP7, MEIS2, KIR2DL4, S |

|            |                                    |                        |                                                                                                                                                                                                                                                                                                                                                                                                                                                                                                                                                                                                                                                                                                                                                                                                                                                                                                                                                                                                                                                                                                                                                                                                                                                                                                                                                                                                                                                                                                                                                                                                                                                                                                                                                                                                                                                                                                                                                                                                                                                                                                                                                                                                                                                                                                                                                                 |
|------------|------------------------------------|------------------------|-----------------------------------------------------------------------------------------------------------------------------------------------------------------------------------------------------------------------------------------------------------------------------------------------------------------------------------------------------------------------------------------------------------------------------------------------------------------------------------------------------------------------------------------------------------------------------------------------------------------------------------------------------------------------------------------------------------------------------------------------------------------------------------------------------------------------------------------------------------------------------------------------------------------------------------------------------------------------------------------------------------------------------------------------------------------------------------------------------------------------------------------------------------------------------------------------------------------------------------------------------------------------------------------------------------------------------------------------------------------------------------------------------------------------------------------------------------------------------------------------------------------------------------------------------------------------------------------------------------------------------------------------------------------------------------------------------------------------------------------------------------------------------------------------------------------------------------------------------------------------------------------------------------------------------------------------------------------------------------------------------------------------------------------------------------------------------------------------------------------------------------------------------------------------------------------------------------------------------------------------------------------------------------------------------------------------------------------------------------------|
|            |                                    |                        | <p>TARD13, KL, ALCAM, PPP1R9A, TMEM117, MICU1, LTBP1, SLAMF1, RGL1, INO80D, RARB, DIDO1, MYH13, WDR12, NAALADL2, TIAM1, MLIP, SORCS2, SLC39A12, DISC1, RALGPS1, ARHGAP42, CHAF1A, PIEZO2, SVEP1, EDAR, EGF, PDGFD, FYN, FAM3B, XRCC4, EPHA7, MAP7, FHIT, NSG2, GRIA1, TRABD2B, SPIDR, STK3, CNOT7, MSR1, PSIP1, USP18, S100B, NET1, PCDH15, ESR1, ARHGAP12, GABRG3, SEL1L2, PLCXD3, GRM1, PDE4D, CNTN5, PRKACB, GNG2, PDE3A, RIMS1, POR, DOCK4, MC TP2, WWOX, HUNK, CNKSR2, FUT8, EPHB1, CREM, EFEMP1, AJAP1, ABC C9, GSG1L, DOCK1, FLT1, EXT1, EFNA5, NXN, CDC14B, C14ORF39, HD AC4, STK36, AMFR, PLCB4, FTO, SH3BP5, AKAP6, ACSBG1, SORCS3, T ENM3, MARK2, ATF2, RBBP8, GRID2, ZNF423, LRP2, SEMA6D, C2, RAL GPS2, NTF3, FER, SNRK, GLDC, SUS4, CAMK4, MAPRE2, RAD51AP1, S GCD, TMEM108, RIC8B, GABRB3, TPTE, GRM7, RAPGEF2, MX1, PLGRKT, IMMP2L, PRKCQ, GABRG2, CPS1, PRKCH, NRXN3, RHPN2, DLC1, NSG1, GABBR2, KCND2, ATP8A2, UBE3A, GRIA4, IDE, CERS6, TPH2, APC, M ACROD2, INO80, AUTS2, TFF1, EPHB2, ERC1, AGO3, C9, MCTP1, MOB3 B, RYR3, PRTG, NBN, ADAMTS18, RGMB, CTNND2, SETD2, PKP1, DOCK2, TRIM23, NRP1, CDH13, RFC3, RPRIP1, DACH1, TRDN, DEFB116, DA B1, RFTN1, ALK, EVC2, LDLRAD4, SEMA3A, SEMA3E, MGAT5, MYEF2, D CLK1, MAGI3, KIF16B, NRIP1, CDH2, ARID5B, SIPA1L2, RCAN2, LRR C69, TENM2, TANC1, PAPP, VPS41, SYCP1, ASB3, HDAC9, PIK3R3, M AP2K6, FSTL4, ARHGAP28, MTOR, STK38L, KSR1, RALGAP2, RORB, G ABRB1, FBLN1, ST8SIA1, BLM, FHL2, PSMB2, NEU3, NCAPG2, RGS7, K YNU, STK32A, CD2AP, USP25, SPRED1, SIPA1L3, ADAM10, FLNB, WDF Y4, SCAI, PAPP2, PTPRT, CSMD1, TRERF1, SLC24A2, GLI3, NTRK3, RXFP1, FBN1, CHKA, RAB31, PRB3, RAPGEF4, BMPER, PDE1A, HMGA2, MX2, NSUN2, DEFA3, PTPRK, SORCS1, TBC1D4, SYT1, AP1P, DPF3, NP HP4, DOCK9, DLG2, PPP1R12B, PPARA, PLXNA2, PTPRD, RORA, SHISA 6, SCARA5, PLCB1, LOXL2, PRKG1, RASGRP1, ELAVL4, NLRC5, DMBT1, MAGI2, PLCL1, ABI1, PXDN, ASIC2, RALA, DOCK10, TRPM1, CACNG 3, PRKD1, BCL2L1, HDAC2, ETS1, TNN, RYR2, SEMA3D, TGFA, PRLR, T BX20, PTPRA, OR11G2, MTMR2, ATF6, EYS, IL16, VCL, DEPTOR, BACH 1, ROBO2, IFT81, OSCP1, ZMYND11, CDH23, RGS6, SRGAP3, AKAP13, WDR41, NEDD9, ENPP1, PCP4, RIMS2, SLC5A1, STAC, RAB27A, EYA4, RALGAP1, DLGAP2, SEMA5A, PRDM15, OR4N2, BCL11A, DCC, CTNNA2, CHN1, VPS13C, PARD3, NRG1, PRKCA, FMN2, SEMA3C, FANCB, CSF2R B, PCNT, BCKDHB, ST18, TOP1</p> |
| GO:0042391 | regulation of membrane potential   | 5.706491773287466e-13  | <p>KCNMA1, SLC8A1, KCNC1, BCL2, GRIK2, IGSF11, UNC13B, SCN11A, K CNK10, FGF12, CACNG2, GRIN2A, NRXN1, GRID1, KCNH1, CACNA1C, N TRK2, SLC24A4, GRIK3, CACNB2, GABRA5, SLC4A4, KCNE4, BID, GAB RR2, GRIK4, GABRG1, P2RX6, ANK2, GRIN2B, GABRA2, KCNH8, GRIK1, DGKI, GRM5, NLGN1, CFTR, NOS1AP, ANK3, RELN, CELF4, APP, CACN A2D1, HCN1, CXADR, PIEZO2, KCND3, GRIA1, GABRG3, GRM1, RIMS1, TRPC5, AKAP6, GRID2, TMEM108, GABRB3, SLC39A8, PPA2, GABRG2, KCND2, TRDN, MTOR, GABRB1, ABCB5, CTNNA3, ASIC2, BCL2L1, RYR2, MTMR2, KCNH5, RIMS2, SCN8A</p>                                                                                                                                                                                                                                                                                                                                                                                                                                                                                                                                                                                                                                                                                                                                                                                                                                                                                                                                                                                                                                                                                                                                                                                                                                                                                                                                                                                                                                                                                                                                                                                                                                                                                                                                                                                                              |
| GO:0050807 | regulation of synapse organization | 6.019442019142057e-13  | <p>SEMA4D, CDH8, TANC2, KALRN, NEGR1, NRXN1, IL1RAPL1, NTRK2, SH ANK2, DLG5, GRIN2B, PAK3, DGKB, IL1RAPL2, NTN1, NLGN1, FLRT2, PTPRO, GPC6, RELN, APP, LRFN5, CLSTN2, DISC1, FRMPD4, FYN, EPH A7, EPHB1, CTTNBP2, EFNA5, PPFIA2, LINGO2, GRID2, UBE3A, EPHB 2, PDLIM5, CDH2, TANC1, LRFN2, NTRK3, ABHD17C, DNM3, SYNDIG1, PTPRD, ASIC2, ROBO2, NEDD9, CTNNA2</p>                                                                                                                                                                                                                                                                                                                                                                                                                                                                                                                                                                                                                                                                                                                                                                                                                                                                                                                                                                                                                                                                                                                                                                                                                                                                                                                                                                                                                                                                                                                                                                                                                                                                                                                                                                                                                                                                                                                                                                                                |
| GO:0003008 | system process                     | 1.2718226522997241e-12 | <p>KCNMA1, APBB2, SLC8A1, CD38, BCL2, CAMTA1, COL18A1, THRB, DNA H11, RAG1, GRIK2, IGSF11, UNC13B, SCN11A, SORBS2, KCNK10, DLG AP1, RCAN1, JAK2, ABCG8, KALRN, USH2A, FGF12, CACNG2, BTBD9, F LI1, TRHDE, GRIN2A, NRXN1, CTDP1, RPS6KA2, KCNH1, CACNA1C, BB S9, MYO9A, NTRK2, OCLN, NCAM2, TMPRSS3, ENPEP, SLC24A4, CACNB 2, MTPN, TRPM3, SHANK2, GABRA5, CHRM3, CALD1, SLIT2, MYLK3, RO R1, SLC4A4, DTNA, CRB1, KCNE4, RAP1GDS1, MYO3B, MYOM1, EXT2, O R4C46, NOS1, SPAG16, HTR2C, SLC03A1, GABRR2, HMCN1, ITGA1, CO RO2B, ITGA8, GABRG1, EYA1, P2RX6, PLS1, ANK2, SLC1A2, GRIN2B, GABRA2, SMPX, BRINP1, ARHGEF11, BBS2, MYOM2, MYO3A, DGKI, ANK</p>                                                                                                                                                                                                                                                                                                                                                                                                                                                                                                                                                                                                                                                                                                                                                                                                                                                                                                                                                                                                                                                                                                                                                                                                                                                                                                                                                                                                                                                                                                                                                                                                                                                                                                           |

|            |                                                     |                        |                                                                                                                                                                                                                                                                                                                                                                                                                                                                                                                                                                                                                                                                                                                                                                                                                                                                                                                                                                                           |
|------------|-----------------------------------------------------|------------------------|-------------------------------------------------------------------------------------------------------------------------------------------------------------------------------------------------------------------------------------------------------------------------------------------------------------------------------------------------------------------------------------------------------------------------------------------------------------------------------------------------------------------------------------------------------------------------------------------------------------------------------------------------------------------------------------------------------------------------------------------------------------------------------------------------------------------------------------------------------------------------------------------------------------------------------------------------------------------------------------------|
|            |                                                     |                        | FN1,SLC1A1,GRM5,NLGN1,DNAH9,SHISA9,OR9Q1,JAM2,CORIN,CNTNAP2,NOS1AP,PTPRO,INSR,ANK3,LHFPL3,RELN,FBXO32,TNR,CELF4,APP,RNLS,PLCE1,GNAL,CACNA2D1,HCN1,CHRM5,CXADR,UTRN,TENM4,RASGRF1,RBFOX1,MEIS2,KL,ADAMTS16,MYH13,MLIP,ARHGAP42,PIEZO2,VSTM4,SVEP1,VTIA,FYN,KCND3,GRIA1,NAV2,S100B,PCDH15,GABRG3,SGCZ,GRM1,PDE4D,CNTN5,LRIG1,PRKACB,PDE3A,RIMS1,DOCK4,EPHB1,EFEMP1,ABCC9,HERC1,EXT1,HDAC4,AMFR,FTO,AKAP6,SORCS3,POU6F2,TUSC3,GRID2,LRP2,NTF3,CAMK4,CELF2,SGCD,TMEM108,GABRB3,GRM7,IMMP2L,ATXN1,SSPN,GABRG2,CPS1,NRXN3,RHPN2,KCND2,ATP8A2,SNTB1,SLC24A3,UBE3A,LOXHD1,TFF1,EPHB2,PDLIM5,NBN,RPGRIPI,TRDN,SLC2A13,TANC1,ASB3,MAP2K6,MTOR,RORB,GABRB1,SLC44A1,SPECC1,CSMD1,SLC24A2,SGCG,CTNNA3,PPP1R12B,PPARA,SHISA6,PLCB1,PRKG1,ELAVL4,TSHZ3,ASIC2,TRPM1,CACNG3,ATP8A1,HADC2,RYR2,TBX20,OR11G2,MTMR2,ATF6,EYS,CDH23,AKAP13,NEDD9,RIMS2,SLC5A1,STAC,SCN8A,EYA4,DLGAP2,OR4N2,CTNNA2,PARD3,PRKCA                                                                                                  |
| GO:0031346 | positive regulation of cell projection organization | 1.7073523372863418e-12 | SEMA4D,FBXO31,CDC42EP3,GRIP1,KALRN,NEGR1,NRXN1,IL1RAPL1,NTRK2,OCLN,TIAM2,CNTN1,SLIT2,ROR1,MACF1,RAP1A,ABL2,ROBO1,PAK3,CHODL,DSCAM,NTN1,IGF1R,NLGN1,CAMK1D,COBL,CUX1,RELN,CDH4,CCDC88A,PLCE1,EPS8,TIAM1,DISC1,FYN,TOX,EFNA5,HDAC4,TRPC5,TENM3,MARK2,RAPGEF2,ATP8A2,APC,AUTS2,EPHB2,NRP1,ALK,TENM2,MTOR,NTRK3,DNM3,PLXNA2,PTPRD,ELAVL4,MAGI2,RALA,PRKD1,TNN,ROBO2,NEDD9,SEMA5A,BCL11A                                                                                                                                                                                                                                                                                                                                                                                                                                                                                                                                                                                                       |
| GO:0050803 | regulation of synapse structure or activity         | 1.956242209995526e-12  | SEMA4D,CDH8,TANC2,KALRN,NEGR1,NRXN1,IL1RAPL1,NTRK2,SHANK2,DLG5,GRIN2B,PAK3,DGKB,IL1RAPL2,NTN1,NLGN1,FLRT2,PTPRO,GPC6,RELN,APP,LRFN5,CLSTN2,DISC1,FMPD4,FYN,EPHA7,EPHB1,CTTNBP2,EFNA5,PPFIA2,LINGO2,GRID2,UBE3A,EPHB2,PDLIM5,CDH2,TANC1,LRFN2,NTRK3,ABHD17C,DNM3,SYNDIG1,PTPRD,ASIC2,ROBO2,NEDD9,CTNNA2                                                                                                                                                                                                                                                                                                                                                                                                                                                                                                                                                                                                                                                                                    |
| GO:0016358 | dendrite development                                | 7.576567920984004e-12  | SEMA4D,FBXO31,GRIP1,TANC2,CSMD3,KALRN,IL1RAPL1,DLG5,HECW1,PAK3,DSCAM,SDK1,NTN1,NLGN1,MAP2,CAMK1D,COBL,CUX1,RELN,APP,PHACTR1,DISC1,ASAP1,FYN,EPHB1,KLHL1,TRPC5,PPFIA2,RAPGEF2,UBE3A,EPHB2,PDLIM5,CTNND2,NRP1,DAB1,ALK,SEMA3A,DCLK1,FSTL4,DNM3,PTPRD,PRKG1,ELAVL4,ABI1,DOCK10,HDAC2,FAT3,BCL11A,DCC,CTNNA2                                                                                                                                                                                                                                                                                                                                                                                                                                                                                                                                                                                                                                                                                  |
| GO:0050793 | regulation of developmental process                 | 1.1657216127808094e-11 | CD44,ZHX3,SEMA4D,PRKCB,SLC8A1,ANKRD6,GPR55,FBXO31,BCL2,RAG1,CDC42EP3,IL6R,ATP10A,GRIP1,TANC2,CSMD3,NTN4,JA K2,KALRN,USH2A,ZNF536,EPB41L3,LAMA1,PARVB,ZBTB7C,NRXN1,ARID1B,IL1RAPL1,WPCP,LAMA3,CTDP1,SMOC2,CTNNA1,MYO9A,NTRK2,TIAM2,SMARCA4,ZNRF3,PALMD,PLEKHB2,GAS2,NUMB,MTN,SOX6,NREP,DLG5,CFDP1,SPRED2,SLIT2,MYLK3,ABCA5,ROR1,ZNF675,AKT3,ALPK2,HECW1,ERBB4,KANK1,DMRT1,MACF1,RAP1A,TRIO,MAP3K5,ABCG1,HTR2C,CNTN4,FGD4,TCF12,RBM19,RUNX1,MAPK9,FAM171A1,EYA1,PLS1,ZBTB16,ROBO1,PAK3,OVOL2,BRINP1,MLLT3,CHODL,GABPA,PRICKLE2,GLIS1,PSG9,BBS2,SOX5,DSCAM,DNMBP,KDM4C,SDK1,GRM5,NTN1,IGF1R,NLGN1,SHROOM3,JAM2,MAP2,CFTR,CAMK1D,FLRT2,INSR,COBL,CUX1,GPC6,RELN,TRPS1,CDH4,TNR,CELF4,APP,ADAM12,PAK1,MITF,ADCK1,CXADR,EPS8,TENM4,GHR,RIN2,RBFOX1,MEIS2,KL,LRRC4C,INO80D,CLSTN2,RARB,TCF4,TIAM1,PBX1,SLC39A12,DISC1,ZFPM2,ASAP1,EGF,FYN,EPHA7,STK3,MSR1,TOX,ESR1,PDE3A,RIMS1,POR,EPHB1,EFEMP1,AJAP1,DOCK1,FLT1,EFNA5,HDAC4,TRPC5,FTO,PPFIA2,AKAP6,LINGO2,MARK2,ATF2,GRID2,LRP2,SEMA6D,NTF3,CAM |

|            |                          |                        |                                                                                                                                                                                                                                                                                                                                                                                                                                                                                                                                                                                                                                                                                                                                                                                                                                                                                                                                                                                                                                                                                                                                                                                                                                                                                                                                                                                                                                                                                                                                                                                                                                                                                                                                                                                                                                                                                                                                                                                                                                                                                                                                                                                                                                                                                     |
|------------|--------------------------|------------------------|-------------------------------------------------------------------------------------------------------------------------------------------------------------------------------------------------------------------------------------------------------------------------------------------------------------------------------------------------------------------------------------------------------------------------------------------------------------------------------------------------------------------------------------------------------------------------------------------------------------------------------------------------------------------------------------------------------------------------------------------------------------------------------------------------------------------------------------------------------------------------------------------------------------------------------------------------------------------------------------------------------------------------------------------------------------------------------------------------------------------------------------------------------------------------------------------------------------------------------------------------------------------------------------------------------------------------------------------------------------------------------------------------------------------------------------------------------------------------------------------------------------------------------------------------------------------------------------------------------------------------------------------------------------------------------------------------------------------------------------------------------------------------------------------------------------------------------------------------------------------------------------------------------------------------------------------------------------------------------------------------------------------------------------------------------------------------------------------------------------------------------------------------------------------------------------------------------------------------------------------------------------------------------------|
|            |                          |                        | K4, NTNG1, RAPGEF2, GTF2I, PRKCH, DLC1, ATP8A2, UBE3A, APC, INO80, EPHB2, PDLIM5, PRTG, FLVCR1, NRP1, DAB1, ALK, LDLRAD4, SEMA3A, SEMA3E, CDH2, HDAC9, FSTL4, MTOR, RORB, FBLN1, SH3KBP1, SPRED1, ADAM10, GLI3, NTRK3, FBN1, BMPER, HMGA2, NSUN2, DNM3, SYT1, SYNDIG1, DPF3, PPARA, PLXNA2, PTPRD, RORA, PLCB1, LOXL2, RASGRP1, ELAVL4, MAGI2, NELL1, ASIC2, RALA, PRKD1, BCL2L1, HDAC2, ETS1, TNN, SEMA3D, PRLR, TBX20, FAT3, MTMR2, VCL, ATAT1, ROBO2, NEDD9, ENPP1, PCP4, RIMS2, SEMA5A, BCL11A, DCC, CHN1, PARD3, NRG1, PRKCA, SEMA3C                                                                                                                                                                                                                                                                                                                                                                                                                                                                                                                                                                                                                                                                                                                                                                                                                                                                                                                                                                                                                                                                                                                                                                                                                                                                                                                                                                                                                                                                                                                                                                                                                                                                                                                                           |
| GO:0048513 | animal organ development | 1.9449855962781347e-11 | CD44, SEMA4D, IGSF3, EVC, TEAD1, NFIA, A2M, SLC8A1, ANKRD6, KCNC1, GPR55, TRAPPC9, BCL2, MMP16, COL18A1, THRB, DNAH11, RAG1, KDM4B, IL6R, SORBS2, CASP5, ZNF568, NDRG2, RCAN1, NTN4, JAK2, KALRN, USH2A, NEGR1, FGF12, FLI1, MEGF11, LAMA1, GRIN2A, NRXN1, ARID1B, WDPCP, LAMA3, CTDP1, ADAMTS6, RPS6KA2, CACNA1C, EXOC4, CTNNA1, NTRK2, FOXN3, AK8, SMARCA4, CNTN1, ZNRF3, MEOX2, ENPEP, NRG3, PTPRG, SLC24A4, FBXL17, GAS2, NUMB, MTPN, SOX6, MECOM, NHS, SHANK2, GABRA5, DLG5, ATRNL1, CPE, SPRED2, SLIT2, MYLK3, ROR1, KAZN, ZNF675, AKT3, CRB1, ALPK2, LCE1F, ERBB4, ATRX, DMRT1, MNAT1, MYO3B, CHSY1, EXT2, EML1, CCDC141, CNTN4, SLC40A1, TCF12, ITGA8, RUNX1, ALDH1A2, CDH17, EYA1, PLS1, ANK2, SLC1A2, ZBTB16, SLIT3, GRIN2B, ROBO1, ANKRD11, EGFLAM, MDM1, OVOL2, MLLT3, CHODL, GABPA, PRICKLE2, PSG9, BBS2, MYO3A, SOX5, DSCAM, SDK1, SLC1A1, NTN1, CA10, NR5A2, LDB2, IGF1R, WDR72, ALX4, CNTNAP2, CFTR, FLRT2, PTPRO, INSR, COBL, GPC6, RELN, TRPS1, ADAMTS5, MYO18B, TNFR, CELF4, APP, ARNT2, PLCE1, TACC2, MITF, HCN1, CXADR, UTRN, TENM4, CECR2, GHR, RBFOX1, MEIS2, KL, ADAMTS16, SLAMF1, NEBL, RARB, TIAM1, PBX1, PHACTR1, DISC1, FMN1, ZFPM2, VSTM4, EDAR, EGF, PDGFD, FYN, EPHA7, STK3, COL19A1, AP2B1, TOX, PCDH15, ESR1, SGCZ, CNTN5, LRIG1, POR, CERS3, WWOX, EPHB1, CTTNBP2, FHOD3, GREB1L, EFEMP1, AJAP1, HERC1, DOCK1, FLT1, EXT1, HDAC4, STK36, KLHL1, FTO, AKAP6, ACSBG1, TENM3, ATF2, GRID2, ZNF423, LRP2, SEMA6D, FER, SNRK, CAMK4, NTNG1, SGCD, TMEIM108, RAPGEF2, IMMP2L, ATXN1, KIRREL3, CPS1, PRKCH, KRT25, DLX1, ATP8A2, SLC24A3, UBE3A, MACROD2, TTLL5, EPHB2, PDLIM5, XYLT1, ADAMTS18, SETD2, DOCK2, FLVCR1, NRP1, MDGA2, RPRGIP1, DAB1, ALK, LDLRAD4, SEMA3A, SEMA3E, DCLK1, NRIP1, CDH2, ARID5B, SERPINB7, HDAC9, PIK3R3, MAP2K6, MTOR, RORB, FHL2, NCAPG2, RGS7, TTC39C, SPRED1, SIPA1L3, ADAM10, FLNB, PAPP2, ABCB5, CSM1, GLI3, NTRK3, RXFP1, FBN1, SGCG, HYDIN, TBX15, BMPER, HMGA2, NSUN2, SYT1, ASXL3, DPF3, SCAPER, NPHP4, PPARA, PLXNA2, RORA, MYH15, PLCB1, LOXL2, BPTF, PRKG1, RASGRP1, ELAVL4, MAGI2, NELL1, ABI1, DOCK10, FNDC3A, BCL2L1, HDAC2, ETS1, TNN, RYR2, SEMA3D, TGFA, PRLR, TBX20, FAT3, ATF6, ATAT1, ROBO2, CDH23, AKAP13, NEDD9, ENPP1, EYA4, L3MBTL3, HIVEP3, SEMA5A, FREM1, DCC, CTNNA2, ETV6, NRG1, PRKCA, SEMA3C |
| GO:0051179 | localization             | 2.183582038410327e-11  | KCNMA1, PARN, SLC12A8, ZFYVE1, SYN3, PRKCB, TRPM6, SLC8A1, KCNC1, DNAJC15, SIAH3, CD38, TRAPPC9, BCL2, THADA, RSR1, DNAH11, SLC13A4, SAMM50, GRIK2, IGSF11, SNX25, UNC13B, KCNQ5, HEPHL1, SCN11A, ATP10A, GOT2, KCNJ6, KCNK10, ZDHHC11B, GPR158, TMEM241, GRIP1, APBA2, TLK1, ASTN2, TANC2, KIF4A, JAK2, TM9SF4, BICD1, LRP1B, ABCG8, KALRN, USH2A, FGF12, CACNG2, BTBD9, SLC4A5, EPB41L3, CDS2, GRIN2A, NRXN1, IL1RAPL1, WDPCP, NIPA2, SLC14A2, ADCYAP1R1, DPP6, PRELID2, GRID1, ZDHHC17, KCNP1, CACNA1C, AMPH, EXOC4, HEATR5A, ANO4, BBS9, CTNNA1, NTRK2, ENTHD1, OCLN, ABCA6, NBEA, TMPRSS3, CNTN1, TTC39B, ELMO1, SLC24A4, SYNE1, GRIK3, CACNB2, NUMB, STXBP4, ESYT2, SYBU, TRPM3, GABRA5, DLG5, CHRM3, CPE, IGHV10R15-9, PITPNC1, CEP128, ABCA5, SLC4A4, CRB1, KCNE4, TRIM5, KCNS3, ABCA13, HECW1, RAP1GDS1, ERBB4, GPHN, ATRX, BID, MACF1, RAP1A, SLC15A5, MYOM1, EXT2, ABL2, NOS1, ABCG1, SPAG16, HTR2C, CCDC141, CACNA1E, TBC1D5, SLC40A1, SLC03A1, GABRR2, PIK3C3, SLC9C1, SNAP25-AS1, CORO2B, ITGA8, GRIK4, GABRG1, MAPK9, IGHV10R21-1, CDH17, SV2B, MORC3, ANKS1B, P2RX6, AKAP10, FRMD6, PLS1, ANK2, PLA2G4A, SLC1A2, ZBTB16, ANO2, GRIN2B, TNKS, NDFIP2, GABRA2, CSE1L, FCHSD2, ITPR2, TRAPPC10, EHBP1, CACNA2D3, PRKCE, PR                                                                                                                                                                                                                                                                                                                                                                                                                                                                                                                                                                                                                                                                                                                                                                                                                                                                                                                                                                                                                                             |

|            |                                                        |                        |                                                                                                                                                                                                                                                                                                                                                                                                                                                                                                                                                                                                                                                                                                                                                                                                                                                                                                                                                                                                                                                                                                                                                                                                                                                                                                                                                                                                                                                                                                                                                                                                                                                                                                                                                                                                                                                                                                                                                                                                                                                                                                                                                                   |
|------------|--------------------------------------------------------|------------------------|-------------------------------------------------------------------------------------------------------------------------------------------------------------------------------------------------------------------------------------------------------------------------------------------------------------------------------------------------------------------------------------------------------------------------------------------------------------------------------------------------------------------------------------------------------------------------------------------------------------------------------------------------------------------------------------------------------------------------------------------------------------------------------------------------------------------------------------------------------------------------------------------------------------------------------------------------------------------------------------------------------------------------------------------------------------------------------------------------------------------------------------------------------------------------------------------------------------------------------------------------------------------------------------------------------------------------------------------------------------------------------------------------------------------------------------------------------------------------------------------------------------------------------------------------------------------------------------------------------------------------------------------------------------------------------------------------------------------------------------------------------------------------------------------------------------------------------------------------------------------------------------------------------------------------------------------------------------------------------------------------------------------------------------------------------------------------------------------------------------------------------------------------------------------|
|            |                                                        |                        | <p>KAA2, CD163, PACRG, BBS2, PTPRN2, KCNH8, GRIK1, DGKI, RIN3, ANKFN1, EFHB, TRAPPC8, SLC1A1, SLC12A1, GRM5, NTN1, IGF1R, WDR72, SNX30, NLGN1, DNAH9, SHISA9, SHROOM3, CORIN, MON2, CNTNAP2, MAP2, KCNIP4, CFTR, CAMK1D, NOS1AP, ZDHHC14, NKAIN2, INSR, CLEC16A, CATSPER2, CUX1, ANK3, SV2C, CNIH3, GPC6, RELN, RASGRF2, MFSD9, DPP10, OCA2, DAPK1, VAV3, VRK1, CLIC6, TTC7B, APP, FBIN5, CCDC88A, PAK1, ATP9B, IGF2BP3, CACNA2D1, HCN1, CHRM5, CXADR, UTRN, GPC5, CECR2, TSPAN13, GHR, RASGRF1, RIN2, USP7, RBOOX1, SCP2, MICU1, LTBP1, SLAMF1, NKAIN3, SLC25A21, FAM126B, SORCS2, SLC39A12, DISC1, OSBPL10, PIEZO2, SLC35F1, VTI1A, EGF, FYN, FAM3B, KCND3, IFT43, XRCC4, LRBA, MAP7, NSG2, GRIA1, SPIDR, STK3, ANO10, MSR1, AP2B1, ESR1, ARHGAP12, GABRG3, KCNN3, KCNAB1, GRM1, PDE4D, ERC2, RIMS1, ATP6V1E1, FRMD4A, MCTP2, PI3K, MIPEP, ABCC9, SNAP29, GSG1L, DOCK1, FAM126A, TRPM7, EXT1, EFNA5, ABCA10, STK36, TRPC5, ATP9A, FTO, PPFIA2, AKAP6, VPS37A, MARK2, ATF2, TUSC3, CCDC91, GRID2, ZNF423, LRP2, C2, NTF3, FER, MAPRE2, ARFGAP3, MICU2, SGCD, TMEM108, GABRB3, GRM7, SLC39A8, RAPGEF2, IMMP2L, ATXN1, GABRG2, NUDCD3, PRKCH, NRXN3, RABGAP1L, NSG1, KCND2, ATP8A2, SLC24A3, UBE3A, GRIA4, APC, EPHB2, STON1, GTF2A1L, SYT16, ERC1, MCTP1, RYR3, NBAS, SETD2, PACSIN2, DOCK2, NUP214, TRIM23, FLVCR1, NRP1, CDH13, TRDN, SLC2A13, DAB1, RFTN1, EXOC6B, ATP13A3, STOML1, DCLK1, KIF16B, NRIP1, CDH2, EVI5, VPS41, SYCP1, ASB3, MAP2K6, MTOR, GABRB1, SH3KBP1, CADPS, NEU3, RGS7, CD2AP, SLC44A1, AP5M1, ADAM10, TSPAN33, ABCB5, SLC24A2, GLI3, FBN1, CHKA, RAB31, VPS13D, ABHD17C, RAPGEF4, BMPER, TMPRSS2, TMPRSS15, MX2, NSUN2, PTPRK, SORCS1, TBC1D4, DNMT3, SYT1, SYNDIG1, NPHP4, DLG2, PPARA, PLXNA2, SCFD2, SHISA6, SCARA5, LOXL2, RASGRP1, STXBP6, DMBT1, MAGI2, STX12, ASIC2, RALA, GNPTAB, TRPM1, CACNG3, PRKD1, ATP8A1, BCL2L1, MICAL3, RANBP17, RYR2, LDLRAD3, BANP, PRLR, MTMR2, KCNH5, TMEM163, IPO11, IL16, VCL, IFT81, OSCP1, CDH23, AKAP13, WDR41, NEDD9, MYRIP, SLC39A11, ENPP1, UNC13C, RIMS2, SLC5A1, STAC, SCN8A, RAB27A, AGAP1, PARD3B, VPS13C, KCNJ15, CEP112, PARD3, NRG1, SLC25A48, ATP10B, SLC35F4, FMN2, PCNT, OSBPL5</p> |
| GO:0007411 | axon guidance                                          | 2.3460480017578863e-11 | <p>SEMA4D, RPS6KA5, NCAM1, KALRN, LAMA1, NRXN1, LAMA3, CNTN1, UNC5D, SLIT2, ADAMTSL1, TRIO, CCDC141, CNTN4, SLIT3, ROBO1, DSCAM, EPHA6, NTN1, FLRT2, PTPRO, RELN, CDH4, TNF, CNTN6, APP, ALCAM, FYN, EPHA7, CNTN5, EPHB1, EXT1, EFNA5, SEMA6D, PRKCQ, NRXN3, EPHB2, PRTG, NRP1, SEMA3A, SEMA3E, GLI3, PLXNA2, SEMA3D, ROBO2, SEMA5A, DCC, CHN1, SEMA3C</p>                                                                                                                                                                                                                                                                                                                                                                                                                                                                                                                                                                                                                                                                                                                                                                                                                                                                                                                                                                                                                                                                                                                                                                                                                                                                                                                                                                                                                                                                                                                                                                                                                                                                                                                                                                                                        |
| GO:0097485 | neuron projection guidance                             | 2.7848485825461376e-11 | <p>SEMA4D, RPS6KA5, NCAM1, KALRN, LAMA1, NRXN1, LAMA3, CNTN1, UNC5D, SLIT2, ADAMTSL1, TRIO, CCDC141, CNTN4, SLIT3, ROBO1, DSCAM, EPHA6, NTN1, FLRT2, PTPRO, RELN, CDH4, TNF, CNTN6, APP, ALCAM, FYN, EPHA7, CNTN5, EPHB1, EXT1, EFNA5, SEMA6D, PRKCQ, NRXN3, EPHB2, PRTG, NRP1, SEMA3A, SEMA3E, GLI3, PLXNA2, SEMA3D, ROBO2, SEMA5A, DCC, CHN1, SEMA3C</p>                                                                                                                                                                                                                                                                                                                                                                                                                                                                                                                                                                                                                                                                                                                                                                                                                                                                                                                                                                                                                                                                                                                                                                                                                                                                                                                                                                                                                                                                                                                                                                                                                                                                                                                                                                                                        |
| GO:0051130 | positive regulation of cellular component organization | 8.516360922009528e-11  | <p>PARN, SEMA4D, FBXO31, CDC42EP3, UNC13B, ATP10A, GRIP1, BICD1, KALRN, NEGR1, NRXN1, IL1RAPL1, BMF, NTRK2, OCLN, TIAM2, CNTN1, PDE4DIP, DLG5, SLIT2, MYLK3, ROR1, ABCA13, ATRX, DMRT1, BID, MACF1, RAP1A, ABL2, TBC1D5, RUNX1, MAPK9, CDH17, ROBO1, PAK3, TNKS, FCHSD2, CHODL, PRKCE, DSCAM, NTN1, IGF1R, SNO30, NLGN1, CNTNAP2, CAMK1D, FLRT2, INSR, COBL, CUX1, MORC2, RELN, CDH4, APP, CCDC88A, PLCE1, PAK1, ADCK1, NSMCE2, EPS8, INO80D, CLSTN2, TIAM1, DISC1, FMN1, ASAP1, FRMPD4, EGF, FYN, TRABD2B, SPIDR, TOX, ESR1, EPHB1, EFNA5, HDAC4, TRPC5, TENM3, LINGO2, MARK2, GRID2, NTF3, FER, MAPRE2, RAD51AP1, RAPGEF2, NAV3, PRKCQ, ATP8A2, APC, INO80, AUTS2, EPHB2, NBN, NRP1, ALK, TENM2, MTOR, NTRK3, RAB31, VPS13D, ATF7IP, DNMT3, SYT1, SYNDIG1, NPHP4, PLXNA2, PTPRD, PLCB1, ELAVL4, MAGI2, ASIC2, RALA, PRKD1, ATP8A1, TNNI3, TGFA, ATAT1, ROBO2, NEDD9, CLIP1, SEMA5A, BCL11A, NRG1</p>                                                                                                                                                                                                                                                                                                                                                                                                                                                                                                                                                                                                                                                                                                                                                                                                                                                                                                                                                                                                                                                                                                                                                                                                                                                            |
| GO:0099173 | postsynapse                                            | 2.378084847823599e-10  | <p>TANC2, KALRN, NRXN1, IL1RAPL1, SHANK2, GPHN, GRIN2B, PAK3, DGKB, IGF1R, NLGN1, NOS1AP, INSR, RELN, FRMPD4, FYN, EPHA7, CNKSR2, EPHB1, PPFIA2, GRID2, TMEM108, UBE3A, EPHB2, PDLIM5, CTNND2, NRP1, CDH2, TANC1, ADAM10, LRFN2, NTRK3, ABHD17C, DNMT3, PT</p>                                                                                                                                                                                                                                                                                                                                                                                                                                                                                                                                                                                                                                                                                                                                                                                                                                                                                                                                                                                                                                                                                                                                                                                                                                                                                                                                                                                                                                                                                                                                                                                                                                                                                                                                                                                                                                                                                                    |

|                |                                                                     |                           |                                                                                                                                                                                                                                                                                                                                                                                                                                                                                                                                                                                                                                                                                                                                                                                                                                                                                                                                                                                                                                                                                                                                                                                                                                                                                                                                                                                                                                                                                                                                                                                                                                                                                                                                                                                                                                                                                                                                                                                                                                                                                                                                                                                                                                                                                                                                                                                                                                                                                                                                                                                                      |
|----------------|---------------------------------------------------------------------|---------------------------|------------------------------------------------------------------------------------------------------------------------------------------------------------------------------------------------------------------------------------------------------------------------------------------------------------------------------------------------------------------------------------------------------------------------------------------------------------------------------------------------------------------------------------------------------------------------------------------------------------------------------------------------------------------------------------------------------------------------------------------------------------------------------------------------------------------------------------------------------------------------------------------------------------------------------------------------------------------------------------------------------------------------------------------------------------------------------------------------------------------------------------------------------------------------------------------------------------------------------------------------------------------------------------------------------------------------------------------------------------------------------------------------------------------------------------------------------------------------------------------------------------------------------------------------------------------------------------------------------------------------------------------------------------------------------------------------------------------------------------------------------------------------------------------------------------------------------------------------------------------------------------------------------------------------------------------------------------------------------------------------------------------------------------------------------------------------------------------------------------------------------------------------------------------------------------------------------------------------------------------------------------------------------------------------------------------------------------------------------------------------------------------------------------------------------------------------------------------------------------------------------------------------------------------------------------------------------------------------------|
|                | organ<br>izati<br>on                                                |                           | PRD, SHISA6, DOCK10, MTMR2, NEDD9                                                                                                                                                                                                                                                                                                                                                                                                                                                                                                                                                                                                                                                                                                                                                                                                                                                                                                                                                                                                                                                                                                                                                                                                                                                                                                                                                                                                                                                                                                                                                                                                                                                                                                                                                                                                                                                                                                                                                                                                                                                                                                                                                                                                                                                                                                                                                                                                                                                                                                                                                                    |
| GO:00<br>50770 | regul<br>ation<br>of<br>axono<br>genes<br>is                        | 3.351998236<br>578787e-10 | SEMA4D, NTRK2, TIAM2, SLIT2, MACF1, ROBO1, PAK3, CHODL, DSCAM, NTN1, MAP2, CDH4, TNF, PAK1, LRRC4C, TIAM1, DISC1, EPHA7, EFN A5, TRPC5, MARK2, SEMA6D, EPHB2, NRP1, DAB1, SEMA3A, SEMA3E, CDH2, FSTL4, PLXNA2, SEMA3D, ROBO2, SEMA5A, BCL11A, DCC, CHN1, SEMA3C                                                                                                                                                                                                                                                                                                                                                                                                                                                                                                                                                                                                                                                                                                                                                                                                                                                                                                                                                                                                                                                                                                                                                                                                                                                                                                                                                                                                                                                                                                                                                                                                                                                                                                                                                                                                                                                                                                                                                                                                                                                                                                                                                                                                                                                                                                                                      |
| GO:00<br>07417 | centr<br>al<br>nervo<br>us<br>syste<br>m<br>devel<br>opmen<br>t     | 5.385691712<br>317555e-10 | SLC8A1, KCNC1, TRAPPC9, BCL2, KDM4B, CASP5, NDRG2, KALRN, NEG R1, CDH11, GRIN2A, NRXN1, CTNNA1, NTRK2, AK8, CNTN1, NRG3, PTP RG, NUMB, MTPN, SOX6, VCAN, SHANK2, GABRA5, DLG5, SLIT2, ROR1, AKT3, ERBB4, ATRX, CHST8, MNAT1, TRIO, EML1, CCDC141, CNTN4, I TGA8, ALDH1A2, SLC1A2, ZBTB16, GRIN2B, ROBO1, BBS2, IL1RAPL2, GRIK1, SLC1A1, CA10, IGF1R, CNTNAP2, MAP2, RELN, TNF, CNTN6, APP, ARNT2, SPOCK1, TACC2, TENM4, MEIS2, RARB, PBX1, PHACTR1, DISC1, EGF, FYN, EPHA7, NAV2, STK3, S100B, TOX, CNTN5, EPHB1, C TTNBP2, HERC1, EXT1, STK36, KLHL1, POU6F2, ATF2, GRID2, ZNF42 3, LRP2, SEMA6D, TMEM108, RAPGEF2, IMPF2L, ATXN1, KIRREL3, DL C1, UBE3A, MACROD2, EPHB2, SETD2, NRP1, MDGA2, DAB1, ALK, SEMA 3A, SEMA3E, DCLK1, CDH2, MTOR, GABRB1, RGS7, GLI3, NTRK3, HYDI N, SYT1, PLXNA2, RORA, PLCB1, BPTF, PRKG1, ELAVL4, ASIC2, HDAC 2, TBX20, ATAT1, ROBO2, SEMA5A, DCC, CTNNA2, NRG1                                                                                                                                                                                                                                                                                                                                                                                                                                                                                                                                                                                                                                                                                                                                                                                                                                                                                                                                                                                                                                                                                                                                                                                                                                                                                                                                                                                                                                                                                                                                                                                                                                                                                                       |
| GO:00<br>48523 | negat<br>ive<br>regul<br>ation<br>of<br>cellu<br>lar<br>proce<br>ss | 5.613615445<br>022996e-10 | CD44, SAMD4A, ZHX3, APBB2, PTPRR, SCAF8, RTN1, PARN, SEMA4D, I NIP, RPS6KA5, TAOK3, PRKCB, SLC8A1, ANKRD6, GPR55, DNAJC15, S IAH3, CD38, FBXO31, BCL2, SAMS1, CHFR, THADA, COL18A1, TOX3, THRB, RAG1, GRIK2, SNX25, KDM4B, ZBTB20, SKAP2, BRD4, ZNF568, NDRG2, ASTN2, RCAN1, JAK2, BICD1, OTUD7A, TPTE2, KALRN, USH2A, ZNF536, ZBTB7C, NRXN1, IL1RAPL1, ADCYAP1R1, CTDP1, RPS6KA2, CACNA1C, BMF, CTNNA1, NTRK2, FOXN3, OCLN, NLK, MYT1L, SRGAP2 B, IQCJ- SCHIP1, SMARCA4, RNF152, ZNRF3, MEOX2, GLIS3, NRG3, PTPRG, SL C24A4, GRIK3, PDE10A, NUMB, MTPN, SOX6, MECOM, RGS12, SHANK2, GABRA5, DLG5, CFDP1, ARHGAP24, SPRED2, SLIT2, ABCA5, ZNF675, CSNK2A1, AKT3, KCNE4, ALPK2, HECW1, ERBB4, KANK1, ATRX, DMRT1, BID, MNAT1, RAP1A, TRIO, PTPRE, DUSP22, ABL2, NOS1, ABCG1, RG S3, RERG, HTR2C, CNTN4, SAMD13, SLC40A1, ETS2, ITGA1, HIRA, CO RO2B, RUNX1, KIR3DL2, ALDH1A2, PTGFR, EYA1, MORC3, SPOCK3, SP ON1, ANK2, ZBTB16, SLIT3, GRIN2B, PHC2, ROBO1, TNKS, KLF12, ND FIP2, MDM1, OVOL2, ITPR2, BRINP1, MLLT3, LEMD3, GABPA, TMEM67, PRKCE, GLIS1, PRKAA2, PACRG, CDYL2, DSCAM, DGKI, RIN3, KDM4C, SLC1A1, GRM5, NTN1, LDB2, IGF1R, SPTB, NLGN1, JAM2, MAP2, CAM K1D, PTPRO, RBMS3, CLEC16A, CUX1, ANK3, TBCD, TRPS1, STK38, TN R, CELF4, DAPK1, INPP5A, APP, PUM1, KCTD1, SPOCK1, PAK1, MITF, IGF2BP3, ADCK1, HCN1, PPP1R13B, CXADR, EPS8, LRFN5, GHR, DUX4, PRDM16, FRMD5, USP7, MEIS2, KIR2DL4, STARD13, AVEN, LTBP1, S LAMF1, BACE2, RARB, PBX1, MLIP, SORCS2, ARHGAP42, ZFPM2, PCBP 3, FYN, EPHA7, FHIT, GRIA1, TRABD2B, STK3, CNOT7, USP18, ESR1, ARHGAP12, KCNAB1, PDE4D, PRKACB, PDE3A, POR, L3MBTL4, FRMD4A, WWOX, EPHB1, CREM, FHOD3, EFEMP1, TNRC6B, AJAP1, HERC1, PARP 15, FLT1, EFNA5, NXN, CDC14B, HDAC4, TRPC5, AMFR, ATP9A, FTO, S H3BP5, AKAP6, SORCS3, ATF2, RBBP8, GRID2, ZNF423, LRP2, SEMA6 D, NTF3, FER, TP53I11, TPTE, GRM7, RAPGEF2, NAV3, ATXN1, PRKCQ, PRKCH, RHPN2, DLC1, ATP8A2, UBE3A, GRIA4, APC, ZBTB25, TFF1, EPHB2, SCAF4, AGO3, MCTP1, RYR3, NBAS, PRTG, NBN, ADAMTS18, PA CSIN2, PKP1, NRP1, CDH13, DACH1, TRDN, ZNF397, DAB1, LDLRAD4, SEMA3A, SEMA3E, MGAT5, MALRD1, DCLK1, NRIP1, CDH2, ARID5B, TE NM2, HDAC9, PIK3R3, FSTL4, ARHGAP28, MTOR, RORB, FBLN1, BLM, F HL2, NEU3, NCAPG2, RGS7, CD2AP, USP25, SPRED1, ADAM10, SCAI, P TPRT, TRERF1, SLC24A2, GLI3, NTRK3, FBN1, ABHD17C, TBX15, BMP ER, ATF7IP, HMGA2, NSUN2, PTPRK, TBC1D4, DNM3, APIP, DPF3, NPH P4, SACS, PPARA, PLXNA2, PTPRD, RORA, SHISA6, PLCB1, LOXL2, BP TF, PRKG1, ELAVL4, NLRC5, STXB6, MXI1, MAGI2, NELL1, ABI1, TS HZ3, ASIC2, PRKD1, TNFAIP8, BCL2L1, HDAC2, ETS1, TNN, RYR2, SE |

|            |                   |                       |                                                                                                                                                                                                                                                                                                                                                                                                                                                                                                                                                                                                                                                                                                                                                                                                                                                                                                                                                                                                                                                                                                                                     |
|------------|-------------------|-----------------------|-------------------------------------------------------------------------------------------------------------------------------------------------------------------------------------------------------------------------------------------------------------------------------------------------------------------------------------------------------------------------------------------------------------------------------------------------------------------------------------------------------------------------------------------------------------------------------------------------------------------------------------------------------------------------------------------------------------------------------------------------------------------------------------------------------------------------------------------------------------------------------------------------------------------------------------------------------------------------------------------------------------------------------------------------------------------------------------------------------------------------------------|
|            |                   |                       | MA3D, TGFA, PRLR, TBX20, FAT3, MTMR2, VCL, DEPTOR, BACH1, ROBO2, ZMYND11, RGS6, SRGAP3, WDR41, NEDD9, ENPP1, EYA4, L3MBTL3, SEMA5A, PRDM15, BCL11A, DCC, CTNNA2, ETV6, VPS13C, PARD3, NRG1, CAST, FANK1, PRKCA, FMN2, SEMA3C, FANCB, ST18                                                                                                                                                                                                                                                                                                                                                                                                                                                                                                                                                                                                                                                                                                                                                                                                                                                                                           |
| GO:0016477 | cell migration    | 7.417027339748524e-10 | CD44, PTPRR, SEMA4D, SLC8A1, FBXO31, BCL2, CDC42BPA, IL6R, ASTN2, NTN4, JAK2, USH2A, LAMA1, WDPCP, LAMA3, SMOC2, CTNNA1, NTRK2, ITGBL1, SRGAP2B, MEOX2, ENPEP, NRG3, PTPRG, ELMO1, NUMB, VCAN, UNC5D, DLG5, ASTN1, ATRNL1, ARHGAP24, SLIT2, AKT3, ERBB4, KANK1, DMRT1, MACF1, DUSP22, ABL2, CCDC141, ITGA1, PEAK1, ROBO1, PAK3, OVOL2, PSTPIP2, PRKCE, RIN3, NTN1, LDB2, IGF1R, JAM2, CAMK1D, FLRT2, PTPRO, INSR, ITGA9, GPC6, RELN, TNF, VAV3, APP, CCDC88A, SPOCK1, PAK1, MITF, CXADR, EPS8, GPC5, RIN2, FRMD5, STARD13, SLAMF1, TIAM1, PHACTR1, DISC1, VSTM4, EGF, PDGFR, FYN, NET1, DOCK4, FUT8, EPHB1, DOCK1, FLT1, EXT1, HDAC4, MARK2, SEMA6D, NTF3, FER, NTNG1, MAPRE2, RAPGEF2, NAV3, PRKCQ, KIRREL3, DLC1, APC, AUTS2, EPHB2, MCTP1, SETD2, DOCK2, SDCCAG8, NRP1, CDH13, DACH1, DAB1, LDLRAD4, SEMA3A, SEMA3E, MGAT5, DCLK1, CDH2, ARID5B, HDAC9, PIK3R3, MTOR, FBLN1, SH3BP1, CD2AP, SPRED1, ADAM10, SCAI, PTPRT, GLI3, NTRK3, CTNNA3, BMPER, PTPRK, PLXNA2, PLCB1, LOXL2, PRKG1, MAGI2, DOCK10, PRKD1, ATP8A1, HDAC2, ETS1, TNN, SEMA3D, TBX20, FAT3, IL16, VCL, SRGAP3, NEDD9, SEMA5A, DCC, CTNNA2, NRG1, PRKCA, SEMA3C |
| GO:0007420 | brain development | 1.3120724944305458e-9 | SLC8A1, KCNC1, TRAPPC9, BCL2, KDM4B, CASP5, NDRG2, NEGR1, GRIIN2A, NRXN1, CTNNA1, NTRK2, AK8, CNTN1, NRG3, PTPRG, NUMB, MTPN, SOX6, SHANK2, GABRA5, DLG5, SLIT2, AKT3, ERBB4, ATRX, MNAT1, EML1, CCDC141, CNTN4, ITGA8, ALDH1A2, SLC1A2, GRIN2B, ROBO1, BBS2, SLC1A1, CA10, IGF1R, CNTNAP2, RELN, TNF, APP, ARNT2, TACC2, MEIS2, RARB, PBX1, PHACTR1, DISC1, EGF, FYN, EPHA7, TOX, CNTN5, EPHB1, CTTNBP2, HERC1, EXT1, STK36, KLHL1, ATF2, GRID2, ZNF423, LRP2, SEMA6D, TMEM108, RAPGEF2, IMMP2L, ATXN1, KIRREL3, DLC1, UBE3A, MACROD2, EPHB2, SETD2, NRP1, DAB1, ALK, SEMA3A, SEMA3E, DCLK1, CDH2, RGS7, GLI3, HYDIN, SYT1, PLXNA2, RORA, PLCB1, BPTF, PRKG1, ELAVL4, ATAT1, ROBO2, SEMA5A, CTNNA2, NRG1                                                                                                                                                                                                                                                                                                                                                                                                                           |
| GO:0060322 | head development  | 1.4622389763805098e-9 | SLC8A1, KCNC1, TRAPPC9, BCL2, KDM4B, CASP5, NDRG2, NEGR1, GRIIN2A, NRXN1, CTNNA1, NTRK2, AK8, CNTN1, NRG3, PTPRG, NUMB, MTPN, SOX6, SHANK2, GABRA5, DLG5, SLIT2, AKT3, ERBB4, ATRX, MNAT1, EML1, CCDC141, CNTN4, ITGA8, ALDH1A2, SLC1A2, GRIN2B, ROBO1, ANKRD11, BBS2, SLC1A1, CA10, IGF1R, CNTNAP2, RELN, TNF, APP, ARNT2, TACC2, MEIS2, RARB, PBX1, PHACTR1, DISC1, EGF, FYN, EPHA7, TOX, CNTN5, EPHB1, CTTNBP2, HERC1, EXT1, STK36, KLHL1, ATF2, GRID2, ZNF423, LRP2, SEMA6D, DDX10, TMEM108, RAPGEF2, IMMP2L, ATXN1, KIRREL3, DLC1, UBE3A, MACROD2, EPHB2, SETD2, FLVCR1, NRP1, DAB1, ALK, SEMA3A, SEMA3E, DCLK1, CDH2, ARID5B, RGS7, GLI3, HYDIN, SYT1, PLXNA2, RORA, PLCB1, BPTF, PRKG1, ELAVL4, ATAT1, ROBO2, SEMA5A, CTNNA2, NRG1                                                                                                                                                                                                                                                                                                                                                                                           |
| GO:0034220 | ion transport     | 1.5612362903597418e-9 | KCNMA1, SLC12A8, TRPM6, SLC8A1, KCNC1, BCL2, THADA, SLC13A4, GRIK2, KCNQ5, SCN11A, ATP10A, KCNJ6, KCNK10, FGF12, CACNG2, GRIN2A, NRXN1, NIPA2, ADCYAP1R1, DPP6, GRID1, ZDHHC17, KCNH1, CACNA1C, ANO4, SLC24A4, GRIK3, CACNB2, TRPM3, GABRA5, CHRM3, SLC4A4, KCNE4, KCNS3, HECW1, NOS1, HTR2C, CACNA1E, SLC40A1, GABRR2, SLC9C1, GRIK4, GABRG1, P2RX6, ANK2, SLC1A2, ANO2, GRIN2B, GABRA2, ITPR2, CACNA2D3, PRKCE, KCNH8, GRIK1, SLC1A1, SLC12A1, GRM5, NLGN1, SHISA9, KCNIP4, CFTR, NOS1, CATSPER2, ANK3, CNIH3, RELN, RASGRF2, DPP10, DAPK1, CLIC6, APP, CACNA2D1, HCN1, UTRN, TSPAN13, RASGRF1, MICU1, SLC25A21, SLC39A12, PIEZO2, FYN, KCND3, GRIA1, ANO10, GABRG3, KCNN3, KCNAB1, GRM1, PDZD4, ATP6V1E1, ABCC9, GSG1L, TRPM7, TRPC5, AKAP6, TUSC3, GRID2, LRP2, MICU2, GABRB3, SLC39A8, GABRG2, KCND2, SLC24A3, GRIA4, EPHB2, RYR3, TRDN, ATP13A3, GABRB1, RGS7, SLC24A2, SHISA6, SCARA5, ASIC2, TRPM1, CACNG3, PRKD1, ATP8A1, RYR2, KCNH5, TMEML63, SLC39A11, SLC5A1, STAC, SCN8A, KCNJ15                                                                                                                                      |
| GO:0048870 | cell motility     | 1.7955325307806966e-9 | CD44, PTPRR, SEMA4D, SLC8A1, FBXO31, BCL2, DNAH11, CDC42BPA, IL6R, ASTN2, NTN4, JAK2, TPST2, USH2A, LAMA1, WDPCP, LAMA3, SMOC2, CTNNA1, NTRK2, ITGBL1, SRGAP2B, MEOX2, ENPEP, NRG3, PTPRG, ELMO1, NUMB, VCAN, DNAH8, UNC5D, DLG5, ASTN1, ATRNL1, ARHGAP24, SLIT2, AKT3, ERBB4, KANK1, DMRT1, MACF1, DUSP22, ABL2, SP                                                                                                                                                                                                                                                                                                                                                                                                                                                                                                                                                                                                                                                                                                                                                                                                                |



|             |                                       |                        |                                                                                                                                                                                                                                                                                                                                                                                                                                                                                                                                                                                                                                                                                                                                                                                                                                                                                                                                                                                                                                                                                               |
|-------------|---------------------------------------|------------------------|-----------------------------------------------------------------------------------------------------------------------------------------------------------------------------------------------------------------------------------------------------------------------------------------------------------------------------------------------------------------------------------------------------------------------------------------------------------------------------------------------------------------------------------------------------------------------------------------------------------------------------------------------------------------------------------------------------------------------------------------------------------------------------------------------------------------------------------------------------------------------------------------------------------------------------------------------------------------------------------------------------------------------------------------------------------------------------------------------|
|             |                                       |                        | AG16,CCDC141,SLC9C1,ITGA1,PEAK1,SPOCK3,ROBO1,PAK3,OVO L2,PSTPIP2,PRKCE,BBS2,RIN3,NTN1,LDB2,IGF1R,JAM2,CAMK1 D,FLRT2,PTPRO,INSR,ITGA9,CATSPER2,GPC6,RELN,TNR,VAV3, APP,CCDC88A,SPOCK1,PAK1,MITF,CXADR,EPS8,GPC5,RIN2,FRM D5,STARD13,SLAMF1,TIAM1,PHACTR1,DISC1,VSTM4,EGF,PDGFD ,FYN,NET1,DOCK4,FUT8,EPHB1,ARMC2,DOCK1,FLT1,EXT1,HDAC 4,MARK2,SEMA6D,NTF3,FER,NTNG1,MAPRE2,TPTE,RAPGEF2,NAV 3,DNAH3,PRKCQ,KIRREL3,DLC1,APC,AUTS2,EPHB2,MCTP1,SETD 2,DOCK2,SDCCAG8,NRP1,CDH13,DACH1,DAB1,LDLRAD4,SEMA3A, SEMA3E,DNAH6,MGAT5,DCLK1,CDH2,ARID5B,HDAC9,PIK3R3,MTO R,FBLN1,SH3KBP1,CD2AP,SPRED1,ADAM10,SCAI,PTPRT,GLI3,N TRK3,CTNNA3,BMPER,PTPRK,NPHP4,PLXNA2,PLCB1,LOXL2,PRKG 1,MAGI2,DOCK10,PRKD1,ATP8A1,HDAC2,ETS1,TNN,SEMA3D,TBX 20,FAT3,IL16,VCL,IFT81,SRGAP3,NEDD9,SEMA5A,DCC,CTNNA2 ,NRG1,PRKCA,SEMA3C                                                                                                                                                                                                                                                                                        |
| GO:00 40011 | locom otion                           | 2.037971486 7941387e-9 | PTPRR,SEMA4D,RPS6KA5,SLC8A1,FBXO31,BCL2,NCAM1,IL6R,RC AN1,JAK2,KALRN,LAMA1,GRIN2A,NRXN1,WDPKP,LAMA3,SMOC2,C TNN1,SRGAP2B,CNTN1,MEOX2,NRG3,PTPRG,NUMB,UNC5D,DLG5, SLIT2,ADAMTSL1,AKT3,ERBB4,KANK1,MACF1,TRIO,DUSP22,ABL 2,CCDC141,CNTN4,ITGA1,SPOCK3,SLIT3,ROBO1,PAK3,PRKCE,B BS2,DSCAM,RIN3,GRM5,EPHA6,NTN1,LDB2,IGF1R,JAM2,CAMK1D ,FLRT2,PTPRO,INSR,ITGA9,RELN,CDH4,TNR,VAV3,CNTN6,APP, PAK1,MITF,CXADR,RIN2,FRMD5,STARD13,ALCAM,SLAMF1,TIAM1 ,PHACTR1,EGF,PDGFD,FYN,EPHA7,CNTN5,DOCK4,EPHB1,DOCK1, FLT1,EXT1,EFNA5,HDAC4,SEMA6D,NTF3,FER,NTNG1,MAPRE2,RA PGEF2,NAV3,PLGRKT,PRKCQ,NRXN3,DLC1,APC,EPHB2,MCTP1,PR TG,DOCK2,NRP1,CDH13,DACH1,LDLRAD4,SEMA3A,SEMA3E,MGAT5 ,HDAC9,PIK3R3,MTOR,FBLN1,SPRED1,ADAM10,SCAI,PTPRT,GLI 3,NTRK3,BMPER,PTPRK,PLXNA2,PLCB1,PRKG1,MAGI2,RALA,DOC K10,PRKD1,ATP8A1,HDAC2,ETS1,TNN,SEMA3D,IL16,VCL,ROBO2 ,SRGAP3,NEDD9,SEMA5A,DCC,CTNNA2,CHN1,NRG1,PRKCA,SEMA3 C                                                                                                                                                                                              |
| GO:00 55085 | trans membr ane trans port            | 3.166995046 899109e-9  | KCNMA1,SLC12A8,PRKCB,TRPM6,SLC8A1,KCNC1,DNAJC15,BCL2, THADA,SLC13A4,GRIK2,KCNQ5,SCN11A,ATP10A,KCNJ6,KCNK10, TMEM241,ABCG8,FGF12,CACNG2,SLC44A5,GRIN2A,NRXN1,NIPA2 ,SLC14A2,ADCYAP1R1,DPP6,GRID1,ZDHHC17,KCNH1,CACNA1C,A NO4,OCNL,ABCA6,SLC24A4,GRIK3,CACNB2,STXBP4,TRPM3,GABR A5,CHRM3,ABCA5,SLC4A4,KCNE4,KCNS3,ABCA13,HECW1,SLC15A 5,NOS1,ABCG1,HTR2C,CACNA1E,SLC40A1,SLC3A1,GABRR2,SLC 9C1,GRIK4,GABRG1,CDH17,SV2B,P2RX6,ANK2,SLC1A2,ANO2,GR IN2B,GABRA2,ITPR2,CACNA2D3,PRKCE,KCNH8,GRIK1,SLC1A1,S LC12A1,GRM5,NLGN1,SHISA9,KCNIP4,CFTR,NOS1AP,INSR,CATS PER2,ANK3,SV2C,CNIH3,RELN,RASGRF2,MFSD9,DPP10,OCA2,DA PK1,CLIC6,APP,CACNA2D1,HCN1,UTRN,TSPAN13,RASGRF1,MICU 1,SLC25A21,SLC39A12,PIEZO2,SLC35F1,FYN,KCND3,GRIA1,AN O10,GABRG3,KCNN3,KCNAB1,GRM1,PDE4D,ATP6V1E1,ABCC9,GS G1L,TRPM7,ABCA10,TRPC5,AKAP6,TUSC3,GRID2,LRP2,MICU2,GA BRB3,SLC39A8,GABRG2,KCND2,SLC24A3,GRIA4,EPHB2,RYR3,FL VCR1,TRDN,SLC2A13,ATP13A3,GABRB1,RGS7,SLC44A1,ABCB5,S LC24A2,SHISA6,SCARA5,ASIC2,TRPM1,CACNG3,PRKD1,ATP8A1, RYR2,KCNH5,TMEM163,OSCP1,SLC39A11,ENPP1,SLC5A1,STAC,S CN8A,KCNJ15,SLC25A48,SLC35F4 |
| GO:00 09966 | regul ation of signa l trans ducti on | 4.617157053 836016e-9  | CD44,PTPRR,SEMA4D,EVC,TAOK3,PRKCB,ANKRD6,GPR55,BCL2,C AMTA1,THRB,IGSF11,SNX25,UNC13B,NCAM1,IL6R,BRD4,NDRG2, DLGAP1,RCAN1,JAK2,BICD1,OTUD7A,TPTE2,KALRN,CACNG2,NFA T5,ZNF536,LAMA1,GRIN2A,NRXN1,ADCYAP1R1,SMOC2,ZDHHC17, CTNNA1,MYO9A,NTRK2,NLK,AFAP1,TIAM2,IQJ- SCHIP1,SMARCA4,RNF152,ZNRF3,SLC24A4,FBXL17,GAS2,PDE10 A,MECOM,RGS12,SHANK2,KCTD8,NREP,DOK5,DLG5,ARHGAP24,SP RED2,SLIT2,ROR1,ZNF675,CSNK2A1,AKT3,TRIM5,PSD3,ALPK2, HECW1,RAP1GDS1,ERBB4,KANK1,DMRT1,BID,MACF1,RAP1A,TRIO ,PTPRE,DUSP22,CHSY1,ABL2,MAP3K5,RGS3,HTR2C,TRAF3,FGD4 ,ITGA1,ITGA8,MAPK9,EYA1,SLIT3,GRIN2B,ROBO1,PAK3,GARNL 3,TNKS,NDFIP2,OVOL2,SGMS1,MLLT3,LEMD3,PRKCE,ARHGEF11, PRKAA2,DGKI,DNMBP,EFHB,KDM4C,GRM5,IGF1R,NLGN1,SHISA9, NOS1AP,PTPRO,RBMS3,INSR,CLEC16A,CNIH3,DOCK3,GPC6,RELN                                                                                                                                                                                                                                                                                                                         |

|            |                                                  |                       |                                                                                                                                                                                                                                                                                                                                                                                                                                                                                                                                                                                                                                                                                                                                                                                                                                                                                                                                                                                                                                               |
|------------|--------------------------------------------------|-----------------------|-----------------------------------------------------------------------------------------------------------------------------------------------------------------------------------------------------------------------------------------------------------------------------------------------------------------------------------------------------------------------------------------------------------------------------------------------------------------------------------------------------------------------------------------------------------------------------------------------------------------------------------------------------------------------------------------------------------------------------------------------------------------------------------------------------------------------------------------------------------------------------------------------------------------------------------------------------------------------------------------------------------------------------------------------|
|            |                                                  |                       | , RASGRF2, STK38, CELF4, DAPK1, VAV3, CNTN6, APP, PUM1, CCDC88A, PLCE1, PAK1, EPS8, GPC5, GHR, RASGRF1, PRDM16, USP7, STARD13, KL, LTBP1, SLAMF1, TIAM1, DISC1, RALGPS1, ARHGAP42, EDAR, EGF, PDGFD, FYN, EPHA7, TRABD2B, STK3, CNOT7, USP18, S100B, NET1, ESR1, ARHGAP12, GRM1, PDE4D, PRKACB, PDE3A, RIMS1, POR, WWOX, CNKSR2, EPHB1, GSG1L, FLT1, NXN, STK36, AMFR, AKAP6, ZNF423, LRP2, RALGPS2, NTF3, FER, MAPRE2, TMEM108, RIC8B, TPTE, RAPGEF2, PRKCQ, PRKCH, DLC1, UBE3A, APC, AUTS2, EPHB2, AGO3, MOB3B, CTNND2, DOCK2, NRP1, CDH13, DAB1, ALK, LDLRAD4, SEMA3A, SEMA3E, MGAT5, MAGI3, CDH2, SIPA1L2, MAP2K6, FSTL4, ARHGAP28, MTOX, KSR1, RALGAP2, FBLN1, FHL2, NEU3, NCAPG2, RGS7, CD2AP, SPRY, ED1, SIPA1L3, ADAM10, SCAI, PTPRT, GLI3, NTRK3, FBN1, BMPER, APIP, NPHP4, PPARA, PTPRD, RORA, SHISA6, PLCB1, RASGRP1, NLRC5, MAGI2, CACNG3, PRKD1, BCL2L1, HDAC2, TNN, TGFA, PRLR, TBX20, MTMR2, ATF6, DEPTOR, ROBO2, IFT81, ZMYND11, RGS6, SRGAP3, AKAP13, ENPP1, RIMS2, EYA4, RALGAP1, DLGAP2, SEMA5A, PRDM15, CHN1, NRG1, PRKCA |
| GO:0030029 | actin filament-based process                     | 5.658952952924201e-9  | BCL2, CDC42BPA, CDC42EP3, SORBS2, JAK2, FGF12, EPB41L3, PARVB, CACNA1C, CTNNA1, THSD7A, ELMO1, GAS2, CACNB2, MTPN, PGM5, CALD1, SLIT2, MYLK3, KCNE4, RAP1GDS1, KANK1, ABL2, HMCN1, FGD4, CORO2B, FAM171A1, FRMD6, PLS1, ANK2, PAK3, FCHSD2, EHBP1, SPTIP2, PRKCE, ARHGEF11, MYOM2, SPTB, SHROOM3, NOS1AP, COBL, CDC88A, PAK1, CACNA2D1, CXADR, EPS8, UTRN, FRMD5, STARD13, PPIR9A, NEBL, PHACTR1, FMN1, FRMPD4, KCND3, PCDH15, ARHGAP12, PDE4D, FHOD3, ABCC9, DIAPH3, TRPM7, EFNA5, KLHL1, PHACTR2, NTF3, FER, SGCD, RHPN2, DLC1, MPRIP, AUTS2, PDLIM5, FRMD3, PACSIN2, DOCK2, NRP1, PHACTR3, SEMA3E, ARHGAP28, MTOR, SH3KBP1, CD2AP, FLNB, SPECC1, NTRK3, CTNNA3, THSD7B, NPHP4, PRKG1, ABI1, RALA, MICAL3, RYR2, AKAP13, NEDD9, SEMA5A, CTNNA2, FMN2                                                                                                                                                                                                                                                                                        |
| GO:0022603 | regulation of anatomical structure morphogenesis | 6.0098718570856385e-9 | CD44, SEMA4D, PRKCB, ANKRD6, FBXO31, CDC42EP3, ATP10A, GRIP1, TANC2, NTN4, KALRN, EPB41L3, PARVB, IL1RAPL1, WPCP, SMOC2, MYO9A, NTRK2, TIAM2, ZNRF3, PALMD, GAS2, CFDP1, SLIT2, ROR1, AKT3, HECW1, KANK1, MACF1, FGD4, RUNX1, FAM171A1, ROBO1, PAK3, MLLT3, CHODL, PRICKLE2, DSCAM, DNMBP, NTN1, NLGN1, SHROOM3, MAP2, CUX1, GPC6, RELN, CDH4, TNFR, ADAM12, PAK1, ADCK1, EPS8, TENM4, LRRC4C, TIAM1, SLC39A12, DISC1, EGF, FYN, EPHA7, ESR1, RIMS1, AJAP1, DOCK1, FLT1, EFNA5, TRPC5, PPFIA2, MARK2, ATF2, SEMA6D, NTNG1, RAPGEF2, GTF2I, DLC1, UBE3A, EPHB2, PDLIM5, NRP1, DAB1, SEMA3A, SEMA3E, CDH2, FSTL4, FBLN1, SH3KBP1, SPRED1, BMPER, HMGA2, DNM3, SYT1, PLXNA2, PTPRD, MAGI2, RALA, PRKD1, ETAS1, TNN, SEMA3D, ROBO2, NEDD9, RIMS2, SEMA5A, BCL11A, DCC, CHN1, PRKCA, SEMA3C                                                                                                                                                                                                                                                        |
| GO:0007416 | synapse assembly                                 | 7.257092643107974e-9  | SEMA4D, NEGR1, NRXN1, IL1RAPL1, NTRK2, SHANK2, DLG5, ERBB4, GABRA2, IL1RAPL2, DSCAM, SDK1, NTN1, NLGN1, FLRT2, GPC6, APP, LRRF5, CLSTN2, EPHA7, CNTN5, EPHB1, EFNA5, LINGO2, GRID2, GABRB3, KIRREL3, GABRG2, NRXN3, EPHB2, PDLIM5, CDH2, NTRK3, DNM3, SYNDIG1, PTPRD, ASIC2, ROBO2, NRG1                                                                                                                                                                                                                                                                                                                                                                                                                                                                                                                                                                                                                                                                                                                                                      |
| GO:0007610 | behavior                                         | 1.3051792987845306e-8 | BCL2, THRB, DNAH11, RAG1, GRIK2, KCNK10, APBA2, RCAN1, KALRN, NEGR1, FGF12, BTBD9, GRIN2A, NRXN1, GRID1, NTRK2, CNTN1, SLC24A4, SHANK2, GABRA5, ASTN1, ABL2, HTR2C, ITGA8, SLC1A2, GRIN2B, BRINP1, PRKCE, BBS2, DSCAM, DGKI, ANKFN1, SDK1, SLC1A1, GRM5, NLGN1, CNTNAP2, INSR, RELN, TNFR, APP, PUM1, EPS8, RASGRF1, MEIS2, FYN, GRIA1, NAV2, S100B, PCDH15, GRM1, EXT1, HDAC4, KLHL1, AMFR, SORCS3, NTF3, CAMK4, ATXN1, KIRREL3, GABRG2, NRXN3, KCND2, ATP8A2, UBE3A, EPHB2, DACH1, DAB1, ALK, TANC1, MTOR, SPECC1, CSMD1, GLI3, NPHP4, PPARA, PLCB1, ELAVL4, ATP8A1, HDAC2, CDH23, NEDD9, NRG1                                                                                                                                                                                                                                                                                                                                                                                                                                              |
| GO:0060078 | regulation of postsynaptic membrane              | 1.838453859064167e-8  | GRIK2, IGSF11, UNC13B, GRIN2A, NRXN1, GRID1, GRIK3, GABRA5, GABRR2, GRIK4, GABRG1, P2RX6, GRIN2B, GABRA2, GRIK1, DGKI, GRM5, NLGN1, RELN, CELF4, APP, GRIA1, GABRG3, GRM1, RIMS1, GRID2, TMEM108, GABRG2, KCND2, GABRB1, MTMR2, RIMS2                                                                                                                                                                                                                                                                                                                                                                                                                                                                                                                                                                                                                                                                                                                                                                                                         |

|                |                                                                       |                           |                                                                                                                                                                                                                                                                                                                                                                                                                                                                                                                                                                                                                                                                                                                                                                                                                                                                                                                                                                                                                                                                                                                                                                                                                                                                                                                                                                                                                                                                           |
|----------------|-----------------------------------------------------------------------|---------------------------|---------------------------------------------------------------------------------------------------------------------------------------------------------------------------------------------------------------------------------------------------------------------------------------------------------------------------------------------------------------------------------------------------------------------------------------------------------------------------------------------------------------------------------------------------------------------------------------------------------------------------------------------------------------------------------------------------------------------------------------------------------------------------------------------------------------------------------------------------------------------------------------------------------------------------------------------------------------------------------------------------------------------------------------------------------------------------------------------------------------------------------------------------------------------------------------------------------------------------------------------------------------------------------------------------------------------------------------------------------------------------------------------------------------------------------------------------------------------------|
|                | ane<br>poten<br>tial                                                  |                           |                                                                                                                                                                                                                                                                                                                                                                                                                                                                                                                                                                                                                                                                                                                                                                                                                                                                                                                                                                                                                                                                                                                                                                                                                                                                                                                                                                                                                                                                           |
| GO:19<br>01888 | regul<br>ation<br>of<br>cell<br>junct<br>ion<br>assem<br>bly          | 2.534083834<br>799884e-8  | SEMA4D, NEGR1, NRXN1, IL1RAPL1, WDPCP, NTRK2, DLG5, MACF1, RAP1A, DUSP22, PEAK1, IL1RAPL2, NTN1, NLGN1, CNTNAP2, FLRT2, GPC6, APP, LRFN5, CLSTN2, FMN1, EPHA7, EPHB1, EFNA5, LINGO2, GRID2, RAPGEF2, PRKCH, DLC1, EPHB2, PDLIM5, NRP1, NTRK3, SYNDIG1, NPHP4, PTPRD, ASIC2, PTPRA, VCL, ROBO2                                                                                                                                                                                                                                                                                                                                                                                                                                                                                                                                                                                                                                                                                                                                                                                                                                                                                                                                                                                                                                                                                                                                                                             |
| GO:00<br>07264 | small<br>GTPase<br>media<br>ted<br>signa<br>l<br>trans<br>ducti<br>on | 2.676861277<br>863848e-8  | GPR55, CDC42EP3, KALRN, ADCYAP1R1, MYO9A, RASGEF1B, TIAM2, ELMO1, RAPGEF5, ARHGAP24, SLIT2, PSD3, KANK1, RAP1A, TRIO, ABL2, RERG, FGD4, ROBO1, GARNL3, ARHGEF11, DGKI, DNMBP, NTN1, CTNNA1, DOCK3, RELN, RASGRF2, VAV3, CCDC88A, PLCE1, EPS8, RASGRF1, RIN2, STARD13, RGL1, TIAM1, RALGPS1, ARHGAP42, NET1, ARHGAP12, DOCK4, DOCK1, RALGPS2, MAPRE2, RAPGEF2, DLC1, AUTS2, EPHB2, DOCK2, NRP1, CDH13, DAB1, SIPA1L2, ARHGAP28, KSR1, RALGAP2, CD2AP, SIPA1L3, SCAI, RAPGEF4, DOCK9, RASGRP1, RALA, DOCK10, PRKD1, SRGAP3, AKAP13, RALGAP1, CHN1, NRG1                                                                                                                                                                                                                                                                                                                                                                                                                                                                                                                                                                                                                                                                                                                                                                                                                                                                                                                     |
| GO:00<br>48589 | devel<br>opmen<br>tal<br>growt<br>h                                   | 2.723755653<br>8076303e-8 | SEMA4D, EVC, BCL2, SORBS2, APBA2, CTDP1, GAS2, MTPN, PTGFRN, SLIT2, ERBB4, ATRX, MACF1, RAD51B, RUNX1, PLS1, SLC1A2, SLIT3, CPQ, BBS2, DSCAM, NTN1, MAP2, INSR, COBL, CDH4, TNFR, APP, CXADR, TENM4, GHR, ALCAM, RARB, DISC1, FMN1, ZFPM2, EPHA7, STK3, PCDH15, ESR1, RIMS1, POR, EXT1, EFNA5, TRPC5, FTO, AKAP6, ATF2, SEMA6D, TMEM108, ATP8A2, UBE3A, AUTS2, PDLIM5, NBN, FLVCR1, NRP1, SEMA3A, SEMA3E, DCLK1, ARID5B, FSTL4, MTOR, NCAPG2, GLI3, SYT1, SCAPER, PPARA, PLCB1, MAGI2, TNN, SEMA3D, PRLR, TBX20, EYS, VCL, AKAP13, RIMS2, SEMA5A, BCL11A, DCC, NRG1, SEMA3C                                                                                                                                                                                                                                                                                                                                                                                                                                                                                                                                                                                                                                                                                                                                                                                                                                                                                               |
| GO:00<br>35249 | synap<br>tic<br>trans<br>missi<br>on,<br>gluta<br>mater<br>gic        | 3.107958401<br>152773e-8  | GRIK2, UNC13B, CDH8, CACNG2, GRIN2A, NRXN1, GRID1, GRIK3, GRID4, GRIN2B, GRIK1, DGKI, GRM5, NLGN1, RELN, TNFR, HCN1, DISC1, GRM1, EXT1, GRID2, GRM7, CDH2, SYT1, TSHZ3, CACNG3, UNC13C                                                                                                                                                                                                                                                                                                                                                                                                                                                                                                                                                                                                                                                                                                                                                                                                                                                                                                                                                                                                                                                                                                                                                                                                                                                                                    |
| GO:00<br>65009 | regul<br>ation<br>of<br>molec<br>ular<br>funct<br>ion                 | 3.821455395<br>3293556e-8 | CD44, PARN, SEMA4D, RPS6KA5, TAOK3, PRKCB, A2M, SLC8A1, KCNC1, GPR55, TRAPPC9, BCL2, MMP16, THADA, RAG1, MAPK10, IL6R, DLGAP1, RCAN1, JAK2, BICD1, KALRN, FGF12, CACNG2, ZBTB7C, GRIN2A, NRXN1, ADCYAP1R1, CACNA1C, MYO9A, NTRK2, RASGEF1B, TIAM2, SMARCA4, NRG3, ELMO1, SLC24A4, CABIN1, CACNB2, MTPN, TBC1D22A, RGS12, RAPGEF5, CHRM3, ARHGAP24, SPRED2, SLIT2, ROR1, ZNF675, CSNK2A1, KCNE4, TRIM5, PSD3, HECW1, RAP1GDS1, ERBB4, BID, MNAT1, RAP1A, TRIO, DUSP22, ABL2, MAP3K5, NOS1, RGS3, TBC1D5, SLCO3A1, TRAF3, FGD4, ITGA1, MAPK9, SPOCK3, SPON1, ANK2, GRIN2B, ROBO1, GARNL3, TNKS, NDFIP2, BCL2L13, PRKCE, ARHGEF11, DGKI, RIN3, DNMBP, EFHB, DCUN1D4, SLC1A1, GRM5, EPHA6, ARAP2, LDB2, IGF1R, NLGN1, SHISA9, MAP2, CFTR, CAMK1D, NOS1AP, PTPRO, INSR, EGLN3, ANK3, CNIH3, DOCK3, TBCD, RELN, RASGRF2, STK38, DAPK1, VAV3, APP, CCDC88A, SPOCK1, PLCE1, PAK1, CACNA2D1, HCN1, FRY, UTRN, GHR, RIPK4, RASGRF1, RIN2, USP7, STARD13, SLAMF1, RGL1, TIAM1, PBX1, PHACTR1, PRIM2, ASAP2, DISC1, RALGPS1, ARHGAP42, ASAP1, EGF, PDGFD, FYN, PRMT8, XRCC4, EPHA7, STK3, NET1, ESR1, ARHGAP12, KCNAB1, PDE4D, PDE3A, RIMS1, POR, DOCK4, EPHB1, ABCC9, GSG1L, HERC1, DOCK1, FLT1, EFNA5, CDC14B, C14ORF39, HDAC4, STK36, AMFR, SH3BP5, AKAP6, MARK2, ATF2, PHACTR2, RALGPS2, NTF3, FER, MAPRE2, ARFGAP3, RIC8B, GRM7, RAPGEF2, PRKCQ, PRKCH, RABGAP1L, DLC1, GABBR2, IDE, APC, EPHB2, ERC1, MOB3B, NBN, DOCK2, TRIM23, NRP1, RFC3, PHACTR3, TRDN, DAB1, ALK, MGAT5, A |

|            |                                           |                      |                                                                                                                                                                                                                                                                                                                                                                                                                                                                                                                                                                                                                                                                                                                                                                                                                                                                                                                                                                                                                                                                                                                                                        |
|------------|-------------------------------------------|----------------------|--------------------------------------------------------------------------------------------------------------------------------------------------------------------------------------------------------------------------------------------------------------------------------------------------------------------------------------------------------------------------------------------------------------------------------------------------------------------------------------------------------------------------------------------------------------------------------------------------------------------------------------------------------------------------------------------------------------------------------------------------------------------------------------------------------------------------------------------------------------------------------------------------------------------------------------------------------------------------------------------------------------------------------------------------------------------------------------------------------------------------------------------------------|
|            |                                           |                      | RID5B, SIPA1L2, CCNG2, RCAN2, SERPINB7, EVI5, HDAC9, PIK3R3, MAP2K6, ARHGAP28, MTOR, KSR1, RALGAP2, FBLN1, SGSM1, BLM, NCAPG2, RGS7, SPRED1, SIPA1L3, PPP2R2C, PTPRT, GLI3, NTRK3, RXFP1, RAPGEF4, HMGA2, TBC1D4, DOCK9, PPP1R12B, PPARA, PLXNA2, SHISA6, PLCB1, PRKG1, RASGRP1, NLRC5, MAGI2, PLCL1, ABI1, DOCK10, CACNG3, PRKD1, TNFAIP8, HDAC2, RYR2, TGFA, PRLR, DEPTOR, RGS6, SRGAP3, AKAP13, WDR41, NEDD9, ENPP1, STAC, RALGAP1, DLGAP2, AGAP1, CHN1, NRG1, CAST, TBC1D9, FANK1, ST18                                                                                                                                                                                                                                                                                                                                                                                                                                                                                                                                                                                                                                                            |
| GO:0034765 | regulation of ion transport               | 4.99755125133524e-8  | KCNMA1, SLC8A1, KCNC1, BCL2, THADA, KCNQ5, SCN11A, KCNJ6, KCN K10, FGF12, CACNG2, GRIN2A, NRXN1, ADCYAP1R1, DPP6, KCNH1, CACNA1C, CACNB2, CHRM3, KCNE4, KCNS3, HECW1, NOS1, CACNA1E, ANK2, GRIN2B, CACNA2D3, PRKCE, KCNH8, GRM5, NLGN1, SHISA9, KCNIP4, CFTR, NOS1AP, CATSPER2, ANK3, CNIH3, RELN, RASGRF2, DPP10, DAPK1, CLIC6, APP, CACNA2D1, HCN1, UTRN, TSPAN13, RASGRF1, FYN, KCND3, KCNAB1, PDE4D, ABCC9, GSG1L, AKAP6, KCND2, EPHB2, TRDN, RGS7, SHISA6, ASIC2, CACNG3, PRKD1, RYR2, KCNH5, STAC, SCN8A, KCNJ15                                                                                                                                                                                                                                                                                                                                                                                                                                                                                                                                                                                                                                 |
| GO:0009887 | animal organogenesis                      | 6.188487667660966e-8 | ANKRD6, BCL2, MMP16, COL18A1, THRB, DNAH11, NTN4, USH2A, FLI1, MEGF11, LAMA1, WPCP, LAMA3, EXOC4, CTNNA1, NTRK2, FOXN3, ZNRF3, NRG3, SLC24A4, SOX6, DLG5, ATRNL1, CPE, SLIT2, ROR1, AKT3, CRB1, ALPK2, ERBB4, MYO3B, CHSY1, EXT2, SLC40A1, ITGA8, ALDH1A2, EYA1, PLS1, SLIT3, ROBO1, ANKRD11, EGFLAM, OVOL2, MLLT3, PRICKLE2, BBS2, MYO3A, SOX5, DSCAM, SDK1, SLC1A1, NTN1, NR5A2, WDR72, ALX4, CFTR, FLRT2, INSR, GPC6, ADAMTS5, HCN1, GHR, MEIS2, ADAMTS16, RARB, TIAM1, PBX1, FMN1, ZFPM2, EDAR, PCDH15, ESR1, LRIG1, POR, WWOX, EPHB1, GREB1L, EFEMP1, AJAP1, EXT1, TENM3, ATF2, LRP2, NTNG1, DLC1, ATP8A2, EPHB2, SETD2, FLVCR1, NRP1, RPGRIP1, CDH2, ARID5B, MTOR, RORB, FHL2, TTC39C, PAPP2, CSM D1, GLI3, RXFP1, FBN1, TBX15, ASXL3, PPARA, MAGI2, HDAC2, RYR2, TGFA, TBX20, FAT3, ROBO2, CDH23, FREM1, CTNNA2, NRG1, SEMA3C                                                                                                                                                                                                                                                                                                                   |
| GO:0044093 | positive regulation of molecular function | 7.031516471036862e-8 | CD44, PARN, SEMA4D, RPS6KA5, TAOK3, PRKCB, KCNC1, GPR55, TRAPPC9, BCL2, IL6R, JAK2, KALRN, CACNG2, GRIN2A, NRXN1, ADCYAP1R1, CACNA1C, MYO9A, NTRK2, RASGEF1B, TIAM2, SMARCA4, NRG3, CACNB2, MTPN, TBC1D22A, RAPGEF5, ARHGAP24, ROR1, TRIM5, RAP1GDS1, ERBB4, BID, MNAT1, RAP1A, ABL2, MAP3K5, NOS1, TBC1D5, SLCO3A1, ITGA1, SPON1, ANK2, GRIN2B, ROBO1, GARNL3, TNKS, BCL2L13, DCUN1D4, SLC1A1, GRM5, EPHA6, ARAP2, IGF1R, CFTR, CAMK1D, NOS1AP, INSR, EGLN3, ANK3, DOCK3, RELN, RASGRF2, DAPK1, VAV3, APP, CCDC88A, PAK1, CACNA2D1, GHR, RIPK4, RASGRF1, RGL1, TIAM1, PRIM2, ASAP2, RALGPS1, ARHGAP42, ASAP1, EGF, PDGFR, FYN, XRCC4, EPHA7, STK3, NET1, ESR1, POR, EPHB1, FLT1, EFNA5, CDC14B, HADC4, STK36, AMFR, AKAP6, MARK2, ATF2, RALGPS2, NTF3, FER, MAPRE2, RAPGEF2, PRKCQ, PRKCH, RABGAP1L, DLC1, IDE, EPHB2, ERC1, MOB3B, NBN, NRP1, RFC3, TRDN, DAB1, ALK, ARID5B, SIPA1L2, EVI5, MAP2K6, MTOR, RALGAP2, FBLN1, SGSM1, RGS7, SIPA1L3, NTRK3, RXFP1, RAPGEF4, HMGA2, TBC1D4, DOCK9, RASGRP1, MAGI2, PLCL1, ABI1, DOCK10, CACNG3, PRKD1, HDAC2, RYR2, TGFA, PRLR, RGS6, AKAP13, WDR41, NEDD9, STAC, RALGAP1, CHN1, NRG1, TBC1D9, FANK1, ST18 |
| GO:0098609 | cell-cell adhesion                        | 7.965403267760546e-8 | CD44, SEMA4D, BCL2, RAG1, IGSF11, CDH8, ASTN2, JAK2, NEGR1, NFAT5, MEGF11, CDH11, NRXN1, ARID1B, IL1RAPL1, MAGI1, LAMA3, CTNNA1, NCAM2, SMARCA4, CNTN1, UNC5D, DLG5, ASTN1, CRB1, LPP, DUSP22, ABL2, CNTN4, HMCN1, ITGA1, ITGA8, RUNX1, CDH17, CDH18, ZBTB16, ROBO1, IGSF5, DSCAM, SDK1, NTN1, NLGN1, JAM2, PCDH9, ITGA9, ANK3, CDH12, GPC6, CDH4, TNF, CNTN6, CXADR, LRFN5, TENM4, PCDH7, LRRC4C, ALCAM, SLAMF1, CLSTN2, FYN, EPHA7, COL19A1, PCDH15, CNTN5, PCDH11X, IGSF21, EXT1, EFNA5, TLN2, TENM3, GRID2, FER, NTNG1, SLC39A8, PRKCQ, KIRREL3, NRXN3, PDLIM5, ADAMTS18, CTNND2, PKP1, CDH13, DAB1, CDH2, TENM2, CD2AP, PTPRT, GLI3, CTNNA3, NPHP4, DLG2, PPARA, PTPRD, PRKG1, RASGRP1, CDH9, STXB P6, FNDC3A, ETS1, FAT3, VCL, ROBO2, CDH23, DCC, CTNNA2, NRG1, PRKCA                                                                                                                                                                                                                                                                                                                                                                            |
| GO:0048583 | regulation                                | 8.847276707293356e-8 | CD44, PTPRR, SEMA4D, EVC, TAOK3, PRKCB, A2M, ANKRD6, GPR55, CD38, BCL2, CAMTA1, SAMS1, THRB, RAG1, IGSF11, SNX25, UNC13B, M                                                                                                                                                                                                                                                                                                                                                                                                                                                                                                                                                                                                                                                                                                                                                                                                                                                                                                                                                                                                                            |

|            |                                          |                       |                                                                                                                                                                                                                                                                                                                                                                                                                                                                                                                                                                                                                                                                                                                                                                                                                                                                                                                                                                                                                                                                                                                                                                                                                                                                                                                                                                                                                                                                                                                                                                                                                                                                                                                                                                                                                                                                                                                                                                                                                                                                                                                                                                                                                                                                     |
|------------|------------------------------------------|-----------------------|---------------------------------------------------------------------------------------------------------------------------------------------------------------------------------------------------------------------------------------------------------------------------------------------------------------------------------------------------------------------------------------------------------------------------------------------------------------------------------------------------------------------------------------------------------------------------------------------------------------------------------------------------------------------------------------------------------------------------------------------------------------------------------------------------------------------------------------------------------------------------------------------------------------------------------------------------------------------------------------------------------------------------------------------------------------------------------------------------------------------------------------------------------------------------------------------------------------------------------------------------------------------------------------------------------------------------------------------------------------------------------------------------------------------------------------------------------------------------------------------------------------------------------------------------------------------------------------------------------------------------------------------------------------------------------------------------------------------------------------------------------------------------------------------------------------------------------------------------------------------------------------------------------------------------------------------------------------------------------------------------------------------------------------------------------------------------------------------------------------------------------------------------------------------------------------------------------------------------------------------------------------------|
|            | of response to stimulus                  |                       | <p>APK10, NCAM1, IL6R, CASP5, BRD4, NDRG2, DLGAP1, RCAN1, JAK2, BICD1, OTUD7A, TPTE2, KALRN, CACNG2, NFAT5, ZNF536, LAMA1, GRIN2A, NRXN1, ARID1B, ADCYAP1R1, CTDLP1, SMOC2, ZDHHC17, CTNNA1, MYO9A, NTRK2, OCLN, NLK, AFAP1, TIAM2, IQCJ-SCHIP1, SMARCA4, RNF152, ZNRF3, SLC24A4, FBXL17, GAS2, PDE10A, MTPN, MECOM, RGS12, SHANK2, KCTD8, NREP, DOK5, DLG5, ARHGAP24, SPRED2, IGHV1OR15-9, SLIT2, ROR1, ZNF675, CSNK2A1, AKT3, TRIM5, PSD3, ALPK2, HECAW1, RAP1GDS1, ERBB4, KANK1, DMRT1, BID, MACF1, RAP1A, TRIO, PTPRE, DUSP22, CHSY1, ABL2, PSMA1, MAP3K5, RGS3, HTR2C, NEK4, TRAF3, FGD4, ITGA1, CORO2B, ITGA8, MAPK9, IGHV1OR21-1, EYA1, PLA2G4A, SUPT3H, SLIT3, GRIN2B, ROBO1, PAK3, GARNL3, TNKS, NDFIP2, OVOL2, SGMS1, MLLT3, LEMD3, PRKCE, PSG9, ARHGEF11, PRKAA2, BBS2, DSCAM, DGKI, RIN3, DNMBP, EFHB, KDM4C, GRM5, IGF1R, NLGN1, SHISA9, CAMK1D, NOS1AP, PTPRO, CD96, RBMS3, INSRR, CLEC16A, CNIH3, DOCK3, GPC6, RELN, RASGRF2, STK38, AOAH, FBXO32, TNFR, CELF4, DAPK1, VAV3, CNTN6, APP, FBLN5, PUM1, CCDC88A, PLCE1, PAK1, EPS8, LRFN5, GPC5, GHR, RASGRF1, PRDM16, USP7, KIR2DL4, STARD13, KL, MICU1, LTBP1, SLAMF1, INO80D, TIAM1, MLIP, DISC1, RALGPS1, ARHGAP42, EDAR, EGF, PDGFR, FYN, EPHA7, TRABD2B, SPIDR, STK3, CNOT7, USP18, S100B, NET1, ESR1, ARHGAP12, GRM1, PDE4D, PRKACB, PDE3A, RIMS1, POR, WWOX, CNKSR2, FUT8, EPHB1, AJAP1, GSG1L, FLT1, NXN, HDAC4, STK36, AMFR, AKAP6, RBBP8, GRID2, ZNF423, LRP2, SEMA6D, C2, RALGPS2, NTF3, FER, SUSL4, MAPRE2, RAD51AP1, TMEM108, RIC8B, TPTE, RAPGEF2, PRKCQ, PRKCH, DLCL1, UBE3A, APC, INO80, AUTS2, EPHB2, AGO3, C9, MCTP1, MOB3B, ADAMTS18, CTNND2, SETD2, DOCK2, NRP1, CDH13, DAB1, RFTN1, ALK, LDLRAD4, SEMA3A, SEMA3E, MGAT5, MAGI3, CDH2, SIPA1L2, MAP2K6, FSTL4, ARHGAP28, MTOR, KSR1, RALGAP2, FBLN1, FHL2, NEU3, NCAPG2, RGS7, CD2AP, USP25, SPRED1, SIPA1L3, ADAM10, SCAI, PTPRT, GLI3, NTRK3, FBN1, BMPER, HMGA2, APIP, DPF3, NPHP4, PPARA, PTPRD, RORA, SHISA6, PLCB1, PRKG1, RASGRP1, NLRC5, MAGI2, CACNG3, PRKD1, BCL2L1, HDAC2, ETS1, TNN, SEMA3D, TGFA, PRLR, TBX20, MTMR2, ATF6, IL16, DEPTOR, ROBO2, IFT81, ZMYND11, RGS6, SRGAP3, AKAP13, WDR41, NEDD9, ENPP1, RIMS2, EYA4, RALGAP1, DLGAP2, SEMA5A, PRDM15, CTNNA2, CHN1, VPS13C, NRG1, PRKCA, FMN2, SEMA3C, FANCB</p> |
| GO:0051960 | regulation of nervous system development | 1.061981341631149e-7  | <p>SEMA4D, FBXO31, KALRN, NRXN1, IL1RAPL1, CTNNA1, NTRK2, TIAM2, NUMB, DLG5, SLIT2, MACF1, ROBO1, PAK3, BRINP1, CHODL, DSCAM, GRM5, NTN1, NLGN1, JAM2, MAP2, FLRT2, CUX1, RELN, CDH4, TNFR, TENM4, CLSTN2, TIAM1, DISC1, EPHA7, EPHB1, EFNA5, TRPC5, LINGO2, GRID2, LRP2, SEMA6D, RAPGEF2, PRKCH, EPHB2, PRTG, NRP1, DAB1, SEMA3A, SEMA3E, FSTL4, MTOR, GLI3, NTRK3, SYNDIG1, PLXNA2, PTPRD, ASIC2, HDAC2, SEMA3D, MTMR2, ROBO2, SEMA5A, BCL11A, DCC, PARD3, SEMA3C</p>                                                                                                                                                                                                                                                                                                                                                                                                                                                                                                                                                                                                                                                                                                                                                                                                                                                                                                                                                                                                                                                                                                                                                                                                                                                                                                                                                                                                                                                                                                                                                                                                                                                                                                                                                                                             |
| GO:0048588 | developmental cell growth                | 1.1954714937252826e-7 | <p>SEMA4D, SORBS2, CTDLP1, SLIT2, MACF1, SLIT3, DSCAM, NTN1, MAP2, COBL, CDH4, TNFR, APP, ALCAM, DISC1, EPHA7, RIMS1, EXT1, EFNA5, TRPC5, AKAP6, SEMA6D, TMEM108, AUTS2, PDLIM5, NRP1, SEMA3A, SEMA3E, DCLK1, FSTL4, SYT1, PPARA, TNN, SEMA3D, VCL, AKAP13, RIMS2, SEMA5A, BCL11A, DCC, SEMA3C</p>                                                                                                                                                                                                                                                                                                                                                                                                                                                                                                                                                                                                                                                                                                                                                                                                                                                                                                                                                                                                                                                                                                                                                                                                                                                                                                                                                                                                                                                                                                                                                                                                                                                                                                                                                                                                                                                                                                                                                                  |
| GO:0030036 | actin cytoskeleton organization          | 1.2669084558949914e-7 | <p>BCL2, CDC42BPA, CDC42EP3, SORBS2, JAK2, EPB41L3, PARVB, CTNNA1, THSD7A, ELM01, GAS2, MTPN, PGM5, CALD1, SLIT2, MYLK3, RAP1GDS1, KANK1, ABL2, HMCN1, FGD4, CORO2B, FAM171A1, FRMD6, PLS1, PAK3, FCHSD2, EHBP1, PSTPIP2, PRKCE, ARHGEF11, MYOM2, SPTB, SHROOM3, NOS1AP, COBL, CCDC88A, PAK1, CXADR, EPS8, UTRN, FRMD5, STARD13, PPP1R9A, NEBL, PHACTR1, FMN1, FRMPD4, PCDH15, ARHGAP12, FHOD3, DIAPH3, TRPM7, EFNA5, KLHL1, PHACTR2, NTF3, FER, RHPN2, DLC1, MPRIP, AUTS2, PDLIM5, FRMD3, PACSIN2, DOCK2, NRP1, PHACTR3, SEMA3E, ARHGAP28, MTOR, SH3KBP1, CD2AP, FLNB, SPICE1, NTRK3, CTNNA3, THSD7B, NPHP4, PRKG1, ABI1, RALA, MICAL3</p>                                                                                                                                                                                                                                                                                                                                                                                                                                                                                                                                                                                                                                                                                                                                                                                                                                                                                                                                                                                                                                                                                                                                                                                                                                                                                                                                                                                                                                                                                                                                                                                                                         |

|            |                                           |                       |                                                                                                                                                                                                                                                                                                                                                                                                                                                                                                                                                                                                                                                                                                                                                                                                                                                                                                                                                                                                                                                                                                                                                                                                                                                                                                                                                                                                                                                                                                                                                                                                                                                                                                                                                                                                                                                                                                                                                                                                                                                                                                                                                                                                                                                                                                                                                                                                                                                                                                                                                                                                                                                                                                                                                                                                                                                                                                                                                                                                                                                                                                                                                                          |
|------------|-------------------------------------------|-----------------------|--------------------------------------------------------------------------------------------------------------------------------------------------------------------------------------------------------------------------------------------------------------------------------------------------------------------------------------------------------------------------------------------------------------------------------------------------------------------------------------------------------------------------------------------------------------------------------------------------------------------------------------------------------------------------------------------------------------------------------------------------------------------------------------------------------------------------------------------------------------------------------------------------------------------------------------------------------------------------------------------------------------------------------------------------------------------------------------------------------------------------------------------------------------------------------------------------------------------------------------------------------------------------------------------------------------------------------------------------------------------------------------------------------------------------------------------------------------------------------------------------------------------------------------------------------------------------------------------------------------------------------------------------------------------------------------------------------------------------------------------------------------------------------------------------------------------------------------------------------------------------------------------------------------------------------------------------------------------------------------------------------------------------------------------------------------------------------------------------------------------------------------------------------------------------------------------------------------------------------------------------------------------------------------------------------------------------------------------------------------------------------------------------------------------------------------------------------------------------------------------------------------------------------------------------------------------------------------------------------------------------------------------------------------------------------------------------------------------------------------------------------------------------------------------------------------------------------------------------------------------------------------------------------------------------------------------------------------------------------------------------------------------------------------------------------------------------------------------------------------------------------------------------------------------------|
|            |                                           |                       | , AKAP13, NEDD9, SEMA5A, CTNNA2, FMN2                                                                                                                                                                                                                                                                                                                                                                                                                                                                                                                                                                                                                                                                                                                                                                                                                                                                                                                                                                                                                                                                                                                                                                                                                                                                                                                                                                                                                                                                                                                                                                                                                                                                                                                                                                                                                                                                                                                                                                                                                                                                                                                                                                                                                                                                                                                                                                                                                                                                                                                                                                                                                                                                                                                                                                                                                                                                                                                                                                                                                                                                                                                                    |
| GO:0048522 | positive regulation of cellular processes | 1.4915470456662957e-7 | CD44, SAMD4A, KCNMA1, ZHX3, APBB2, SCAF8, ERG, PARN, SEMA4D, EVC, TEAD1, NFIA, RPS6KA5, TAOK3, PRKCB, SLC8A1, ANKRD6, KCNC1, GPR55, CD38, FBXO31, BCL2, CAMTA1, CHFR, TOX3, THRB, RAG1, CD42EP3, GRIK2, IGSF11, UNC13B, IL6R, ZBTB20, ATP10A, BRD4, GRIP1, JAK2, TM9SF4, BICD1, KALRN, NEGR1, CACNG2, NFAT5, FLI1, LAMA1, ZBTB7C, GRIN2A, NRXN1, ARID1B, IL1RAPL1, MAGI1, ADCYAP1R1, RPS6KA2, SMOC2, ZDHHC17, BMF, CTNNA1, NTRK2, OCLN, TIAM2, IQCJ-SCHIP1, SMARCA4, RNF152, CNTN1, MEOX2, GLIS3, NRG3, CACNB2, NUMB, STXBP4, MED15, MTPN, SOX6, MECOM, PDE4DIP, SHANK2, UBE2E2, DOK5, DLG5, SPRED2, IGHV1OR15-9, SLIT2, MYLK3, ROR1, GLP2R, SLC4A4, CSNK2A1, AKT3, KMT2C, TRIM5, ABCA13, ERBB4, KANK1, ATRX, DMRT1, BID, MACF1, MNAT1, TAF4B, RAP1A, CTNBNL1, RAD51B, DUSP22, CHSY1, MYOM1, ABL2, MAP3K5, NOS1, ABCG1, MAML2, HTR2C, NEK4, CTIF, TBC1D5, SLC40A1, SLCO3A1, TRAF3, CHD6, ETS2, ITGA1, TCF12, ZNF721, CORO2B, ITGA8, RUNX1, ALDH1A2, MAPK9, ESRRG, PTGFR, IGHV1OR21-1, CDH17, EYA1, MORC3, PLS1, ANK2, PLA2G4A, SLC1A2, ZBTB16, SUPT3H, GRIN2B, ROBO1, EGFLAM, PAK3, TNKS, KLF12, NDFIP2, OVOL2, FCHSD2, BRINP1, MLLT3, CHODL, GABPA, PRKCE, GLIS1, ARHGEF11, PRKAA2, EDIL3, SOX5, DSCAM, DGKI, KDM4C, SLC1A1, GRM5, EPHA6, NTN1, NR5A2, LDB2, IGF1R, SNX30, NLGN1, JAM2, ALX4, CNTNAP2, MAP2, CFTR, CAMK1D, FLRT2, MLLT10, NOS1AP, INSR, COBL, CLEC16A, CUX1, ANK3, MORC2, DOCK3, RELN, RASGRF2, CDH4, TNR, DPP10, CELF4, DAPK1, VAV3, ZNF600, VRK1, CNTN6, APP, PUM1, CCDC88A, ARNT2, HPSE2, PLCE1, PAK1, MITF, CACNA2D1, ADCK1, NSMCE2, ZNF208, EPS8, UTRN, GPC5, TENM4, PRR16, GHR, DUX4, RASGRF1, RIN2, PRDM16, FRMD5, RNF217, USP7, MEIS2, KIR2DL4, SCP2, KL, TASP1, SLAMF1, INO80D, CLSTN2, RARB, TCF4, TIAM1, PBX1, MLIP, PRIM2, DISC1, FMN1, ZFPM2, ASAP1, FRMPD4, EDAR, EGF, PDGFD, FYN, EPHA7, TRABD2B, SPIDR, STK3, CNOT7, MSR1, PSIP1, S100B, NET1, TOX, ESRR1, GRM1, PDE3A, RIMS1, POR, DOCK4, FRMD4A, WWOX, EPHB1, SSBP2, CREM, TNRC6B, DOCK1, FLT1, EFNA5, CDC14B, HDAC4, ZNF717, STK36, TRPC5, FTO, AKAP6, TENM3, LINGO2, MARK2, ATF2, RBBP8, GRID2, ZNF423, LRP2, SEMA6D, NTF3, FER, CAMK4, MAPRE2, RAD51AP1, TMMEM108, RAPGEF2, NAV3, ZNF615, GTF2I, PRKCQ, PRKCH, DLC1, NSG1, ATP8A2, UBE3A, APC, INO80, AUTS2, EPHB2, ZNF850, AGO3, MOB3, NBN, RGM, NRP1, CDH13, RFC3, TRDN, SLC2A13, DAB1, ALK, SEMA3A, SEMA3E, MGAT5, NRIP1, CDH2, ARID5B, TENM2, SERPINB7, ZNF407, HDAC9, PIK3R3, MAP2K6, MTOR, KSR1, RORB, FBLN1, ST8SIAL1, BLM, SH3KBP1, CADPS, NEU3, NCAPG2, RGS7, CD2AP, SPRED1, ADAM10, KANSL1, TRERF1, SLC24A2, GLI3, NTRK3, RAB31, VPS13D, ABHD17C, ZNF292, TBX15, BMPER, ANKRD31, ZNF521, ATF7IP, HMGA2, CREB5, DNMT3, SYT1, SYNDIG1, ASXL3, DPF3, NPHP4, PPARA, PLXNA2, PTPRD, RORA, PLCB1, LOXL2, BPTF, RASGRP1, ELAVL4, NLRC5, MAGI2, NELL1, ABI1, TSHZ3, ASIC2, RALA, CACNG3, PRKD1, ATP8A1, TNFAIP8, BCL2L1, HDAC2, ETS1, MRPS27, TNN, RYR2, SEMA3D, BANP, TGFA, PRLR, TBX20, MTMR2, ATF6, BACH1, ATAT1, ROBO2, AKAP13, NEDD9, MYRIP, PCP4, RIMS2, STAC, RAB27A, EYA4, POMT2, HIVEP3, CLIP1, SEMA5A, PRDM15, BCL11A, ZNF112, ETV6, PARD3, NRG1, FANK1, ZNF845, NPAS3, PRKCA, FMN2, SEMA3C, FANCB, CSF2RB, PCNT, ST18 |
| GO:0034762 | regulation of transmembrane transport     | 2.061207891955606e-7  | KCNMA1, PRKCB, SLC8A1, KCNC1, BCL2, THADA, KCNQ5, SCN11A, KCNJ6, KCNK10, FGF12, CACNG2, GRIN2A, NRXN1, ADCYAP1R1, DPP6, KCNH1, CACNA1C, OCLN, CACNB2, STXBP4, CHRM3, KCNE4, KCNS3, HECW1, NOS1, CACNA1E, ANK2, SLC1A2, GRIN2B, CACNA2D3, PRKCE, KCNH8, GRM5, NLGN1, SHISA9, KCNIP4, CFTR, NOS1AP, INSR, CATSPER2, ANK3, CNIH3, RELN, RASGRF2, DPP10, DAPK1, CLIC6, APP, CACNA2D1, HCN1, UTRN, TSPAN13, RASGRF1, FYN, KCND3, KCNAB1, PDE4D, ABCC9, GSG1L, AKAP6, KCND2, EPHB2, TRDN, RGS7, SHISA6, ASIC2, CACNG3, PRKD1, RYR2, KCNH5, ENPP1, STAC, SCN8A, KCNJ15                                                                                                                                                                                                                                                                                                                                                                                                                                                                                                                                                                                                                                                                                                                                                                                                                                                                                                                                                                                                                                                                                                                                                                                                                                                                                                                                                                                                                                                                                                                                                                                                                                                                                                                                                                                                                                                                                                                                                                                                                                                                                                                                                                                                                                                                                                                                                                                                                                                                                                                                                                                                          |
| GO:0007010 | cytoskeleton organization                 | 2.2894262429484163e-7 | C10ORF90, BCL2, CDC42BPA, CDC42EP3, SORBS2, KIF4A, JAK2, BICD1, EPB41L3, PARVB, MAST4, WDPCP, CCSE2, CTNNA1, OCLN, THSD7A, AFAP1, IQCJ-SCHIP1, LRRC49, ELMO1, GAS2, MTPN, PDE4DIP, DNAH8, PGM5, CALD                                                                                                                                                                                                                                                                                                                                                                                                                                                                                                                                                                                                                                                                                                                                                                                                                                                                                                                                                                                                                                                                                                                                                                                                                                                                                                                                                                                                                                                                                                                                                                                                                                                                                                                                                                                                                                                                                                                                                                                                                                                                                                                                                                                                                                                                                                                                                                                                                                                                                                                                                                                                                                                                                                                                                                                                                                                                                                                                                                     |

|            |            |                       |                                                                                                                                                                                                                                                                                                                                                                                                                                                                                                                                                                                                                                                                                                                                                                                                                                                                                                                                                                                                                                                                                                                                                                                                                                                                                                                                                                                                                                                                                                                                                                                                                                                                                                                                                                                                                                                                                                                                                                                                                                                                                                                                                                                                                                                                                                                                                                                                                                                                                      |
|------------|------------|-----------------------|--------------------------------------------------------------------------------------------------------------------------------------------------------------------------------------------------------------------------------------------------------------------------------------------------------------------------------------------------------------------------------------------------------------------------------------------------------------------------------------------------------------------------------------------------------------------------------------------------------------------------------------------------------------------------------------------------------------------------------------------------------------------------------------------------------------------------------------------------------------------------------------------------------------------------------------------------------------------------------------------------------------------------------------------------------------------------------------------------------------------------------------------------------------------------------------------------------------------------------------------------------------------------------------------------------------------------------------------------------------------------------------------------------------------------------------------------------------------------------------------------------------------------------------------------------------------------------------------------------------------------------------------------------------------------------------------------------------------------------------------------------------------------------------------------------------------------------------------------------------------------------------------------------------------------------------------------------------------------------------------------------------------------------------------------------------------------------------------------------------------------------------------------------------------------------------------------------------------------------------------------------------------------------------------------------------------------------------------------------------------------------------------------------------------------------------------------------------------------------------|
|            | ization    |                       | 1,SLIT2,MYLK3,RAP1GDS1,KANK1,ATRX,MACF1,ABL2,SPAG16,EML1,HMCN1,FGD4,CORO2B,FAM171A1,FRMD6,PLS1,ANK2,PAK3,TNKS,MDM1,FCHSD2,EHBP1,PSTPIP2,TMEM67,PRKCE,ARHGFE11,PRKAA2,BBS2,MYOM2,ANKFN1,SPTB,NLGN1,SHROOM3,MAP2,NOS1AP,COBL,ANK3,TBCD,CCDC88A,PLCE1,TACC2,PAK1,CXADR,EPS8,UTRN,CECR2,FRMD5,STARD13,PPP1R9A,TTLL11,NEBL,PHACTR1,SLC39A12,DISC1,FMN1,FRMPD4,MAP7,PCDH15,ARHGAP12,FHOD3,ARMC2,DIAPH3,TRPM7,EFNA5,CDC14B,TLN2,STK36,KLHL1,MARCK2,ATF2,PHACTR2,NTF3,FER,MAPRE2,NAV3,RHPN2,KRT25,DLC1,ATP8A2,MPRIP,APC,TTLL5,INO80,AUTS2,PDLIM5,FRMD3,SETD2,PACSIN2,PKP1,DOCK2,SDCCAG8,NRP1,PHACTR3,TRDN,SEMA3E,DCLK1,ARHGAP28,MTOR,SH3KBP1,CD2AP,SIPA1L3,FLNB,SPECC1,NTRK3,HYDIN,CTNNA3,THSD7B,NPHP4,PRKG1,ABI1,RALA,MICAL3,ATAT1,AKAP13,NEDD9,CLIP1,SEMA5A,CTNNA2,CEP44,PARD3B,PARD3,FMN2,PCNT                                                                                                                                                                                                                                                                                                                                                                                                                                                                                                                                                                                                                                                                                                                                                                                                                                                                                                                                                                                                                                                                                                                                                                                                                                                                                                                                                                                                                                                                                                                                                                                                                                                                                            |
| GO:0006810 | transport  | 2.5709771229211975e-7 | KCNMA1,SLC12A8,SYN3,PRKCB,TRPM6,SLC8A1,KCNK1,DNAJC15,SLAH3,CD38,TRAPPC9,BCL2,THADA,RSRC1,DNAH11,SLC13A4,SAHMM50,GRIK2,SNX25,UNC13B,KCNQ5,HEPH11,SCN11A,ATP10A,GOT2,KCNJ6,KCNK10,ZDHHC11B,TMEM241,GRIP1,APBA2,TLK1,ASTN2,TANC2,KIF4A,JAK2,TM9SF4,BICD1,LRP1B,ABCG8,KALRN,FGF12,CACNG2,BTBD9,SLC44A5,GRIN2A,NRXN1,IL1RAPL1,WDCP,NIPA2,SLC14A2,ADCYAP1R1,DPP6,PRELID2,GRID1,ZDHHC17,KCNH1,CACNA1C,AMPH,EXOC4,HEATR5A,ANO4,BBS9,NTRK2,ENTHD1,OCNL,ABCA6,TMPRSS3,CNTN1,TTC39B,ELMO1,SLC24A4,GRIK3,CACNB2,NUMB,STXBP4,ESYT2,SYBU,TRPM3,GABRA5,CHRM3,CPE,IGHV10R15-9,PITPNC1,ABCA5,SLC4A4,KCNE4,KCNS3,ABCA13,HECW1,RAP1GDS1,ERBB4,BID,MACF1,RAP1A,SLC15A5,MYOM1,EXT2,ABL2,NOS1,ABCG1,SPAG16,HTR2C,CACNA1E,TBC1D5,SLC40A1,SLC03A1,GABRR2,PIK3C3,SLC9C1,SNAP25-AS1,GRIK4,GABRG1,IGHV10R21-1,CDH17,SV2B,P2RX6,PLS1,ANK2,PLA2G4A,SLC1A2,ANO2,GRIN2B,TNKS,NDFIP2,GABRA2,CSE1L,FCHSD2,ITPR2,TRAPPC10,EHBP1,CACNA2D3,PRKCE,CD163,BBS2,PTPRN2,KCNH8,GRIK1,DGKI,RIN3,EFHB,TRAPPC8,SLC1A1,SLC12A1,GRM5,NTN1,IGF1R,SNX30,NLGN1,DNAH9,SHISA9,CORIN,MON2,MAP2,KCNIP4,CFTF,CAMK1D,NOS1AP,ZDHHC14,NKAIN2,INSR,CLEC16A,CATSPER2,CUX1,ANK3,SV2C,CNIH3,RELN,RASGRF2,MFSD9,DPP10,OCA2,DAPK1,VAV3,CLIC6,APP,FBLN5,CCDC88A,PAK1,ATP9B,IGF2BP3,CACNA2D1,HCN1,CHRM5,CXADR,UTRN,CECR2,TSPAN13,GHR,RASGRF1,RIN2,USP7,RBFOX1,SCP2,MICU1,SLAMF1,NKAIN3,SLC25A21,SORCS2,SLC39A12,OSBPL10,PIEZO2,SLC35F1,VTI1A,EGF,FYN,FAM3B,KCND3,IFT43,NSG2,GRIA1,STK3,ANO10,MSR1,AP2B1,ARHGAP12,GABRG3,KCNN3,KCNAB1,GRM1,PDE4D,ERC2,RIMS1,ATP6V1E1,FRMD4A,MCTP2,MIPEP,ABCC9,SNAP29,SGS1L,DOCK1,TRPM7,EXT1,EFNA5,ABCA10,STK36,TRPC5,ATP9A,PPF1A2,AKAP6,VPS37A,ATF2,TUSC3,CCDC91,GRID2,LRP2,C2,NTF3,FER,ARFGAP3,MICU2,TMEM108,GABRB3,GRM7,SLC39A8,IMMP2L,ATXN1,GABRG2,NRXN3,RABGAP1L,NSG1,KCND2,ATP8A2,SLC24A3,UBE3A,GRIA4,EPHB2,STON1-GTF2A1L,SYT16,ERC1,MCTP1,RYR3,NBAS,SETD2,PACSIN2,DOCK2,NUP214,TRIM23,FLVCR1,NRP1,CDH13,TRDN,SLC2A13,RFTN1,EXOC6B,ATP13A3,STOML1,DCLK1,KIF16B,CDH2,EVI5,VPS41,MAP2K6,GABRB1,SH3KBP1,CADPS,NEU3,RGS7,CD2AP,SLC44A1,AP5M1,ADAM10,ABCB5,SLC24A2,GLI3,CHKA,RAB31,VPS13D,RAPGEF4,TMPRSS2,TMPRSS15,MX2,NSUN2,SORCS1,TBC1D4,DNM3,SYT1,SYNDIG1,DLG2,PPARA,SCFD2,SHISA6,SCARA5,LOXL2,RASGRP1,STXBP6,DMBT1,MAGI2,STX12,ASIC2,RALA,GNPTAB,TRPM1,CACNG3,PRKD1,ATP8A1,BCL2L1,MICAL3,RANBP17,RYR2,LDLRAD3,PRLR,MTMR2,KCNH5,TMEM163,IPO11,IL16,IFT81,OSCP1,CDH23,AKAP13,WDR41,MYRIP,SLC39A11,ENPP1,UNC13C,RIMS2,SLC5A1,STAC,SCN8A,RAB27A,AGAP1,VPS13C,KCNJ15,PARD3,NRG1,SLC25A48,ATP10B,SLC35F4,FMN2,PCNT,OSBPL5 |
| GO:0051239 | regulation | 3.243606165677337e-7  | KCNMA1,PTPRR,SEMA4D,RPS6KA5,PRKCB,SLC8A1,GPR55,CD38,FBXO31,BCL2,THRB,RAG1,IGSF11,UNC13B,IL6R,ZBTB20,SCN11A,NDRG2,DLGAP1,NTN4,JAK2,ABCG8,KALRN,FGF12,LAMA1,GRIN2                                                                                                                                                                                                                                                                                                                                                                                                                                                                                                                                                                                                                                                                                                                                                                                                                                                                                                                                                                                                                                                                                                                                                                                                                                                                                                                                                                                                                                                                                                                                                                                                                                                                                                                                                                                                                                                                                                                                                                                                                                                                                                                                                                                                                                                                                                                      |

|            |                                            |                      |                                                                                                                                                                                                                                                                                                                                                                                                                                                                                                                                                                                                                                                                                                                                                                                                                                                                                                                                                                                                                                                                                                                                                                                                                                                                                                                                                                                                                                                                                                            |
|------------|--------------------------------------------|----------------------|------------------------------------------------------------------------------------------------------------------------------------------------------------------------------------------------------------------------------------------------------------------------------------------------------------------------------------------------------------------------------------------------------------------------------------------------------------------------------------------------------------------------------------------------------------------------------------------------------------------------------------------------------------------------------------------------------------------------------------------------------------------------------------------------------------------------------------------------------------------------------------------------------------------------------------------------------------------------------------------------------------------------------------------------------------------------------------------------------------------------------------------------------------------------------------------------------------------------------------------------------------------------------------------------------------------------------------------------------------------------------------------------------------------------------------------------------------------------------------------------------------|
|            | of multi cellular organismal processes     |                      | A,NRXN1,ARID1B,IL1RAPL1,WDCP,LAMA3,CTDP1,SMOC2,CACNA1C,CTNNA1,NTRK2,TIAM2,SMARCA4,MEOX2,PTPRG,SLC24A4,CACNB2,NUMB,MTPN,SOX6,DLG5,CHRM3,SPRED2,SLIT2,ZNF675,AKT3,KCNE4,ALPK2,ERBB4,DMRT1,MACF1,CHSY1,NOS1,HTR2C,TRAF3,CORO2B,RBM19,RUNX1,ESRRG,PLS1,ANK2,ZBTB16,GRIN2B,ROBO1,PAK3,OVOL2,BRINP1,CHODL,GABPA,PRKCE,PSG9,BBS2,SOX5,DSCAM,SLC1A1,GRM5,NTN1,IGF1R,NLGN1,SHISA9,JAM2,CORIN,MAP2,CFTR,FLRT2,NOS1AP,PTPRO,CD96,INSR,CUX1,RELN,TRPS1,ADAMTS5,FBXO32,CDH4,TNR,CELF4,APP,RNLS,PLCE1,ADAM12,MITF,IGF2BP3,CACNA2D1,HCN1,CXADR,TENM4,GHR,RIN2,PRDM16,MEIS2,KIR2DL4,STARD13,KL,LTBP1,SLAMF1,INO80D,CLSTN2,RARB,TIAM1,PBX1,MLIP,SLC39A12,DISC1,ARHGAP42,ZFPM2,EGF,KCND3,EPHA7,STK3,TOX,ESR1,GRM1,PDE4D,PDE3A,RIMS1,POR,DOCK4,EPHB1,EFEMP1,AJAP1,ABCC9,DOCK1,FLT1,EFNA5,HDAC4,TRPC5,FTO,AKAP6,LINGO2,ATF2,GRID2,ZNF423,LRP2,SEMA6D,CAMK4,CELF2,MAPRE2,TMEM108,RAPGEF2,NAV3,GTTF2I,PRKCQ,PRKCH,ATP8A2,APC,INO80,EPHB2,PTRG,ADAMTS18,SETD2,FLVCR1,NRP1,TRDN,DAB1,RFTN1,LDLRAD4,SEMA3A,SEMA3E,SERPINB7,ASB3,HDAC9,MAP2K6,FSTL4,MTOR,FBLN1,CD2AP,SPRED1,ADAM10,GLI3,NTRK3,FBN1,CTNNA3,BMPER,HMGA2,SYNDIG1,PPP1R12B,PPARA,PLXNA2,PTPRD,RORA,SHISA6,PLCB1,LOXL2,PRKG1,RASGRP1,NELL1,PLCL1,TSHZ3,ASIC2,PRKD1,HDAC2,ETS1,TNN,RYR2,SEMA3D,PRLR,TBX20,MTMR2,IL16,VCL,ROBO2,NEDD9,ENPP1,RIMS2,DLGAP2,SEMA5A,BCL11A,DCC,PARD3,NRG1,PRKCA,SEMA3C                                                                                                                                                                          |
| GO:0007166 | cell surface receptor signaling pathway    | 3.873429454982823e-7 | CD44,PTPRR,SEMA4D,EVC,RPS6KA5,PRKCB,ANKRD6,CD38,BCL2,GRIK2,IGSF11,SNX25,UNC13B,MAPK10,NCAM1,IL6R,SORBS2,NDRG2,JAK2,KALRN,FGF12,LAMA1,GRIN2A,NRXN1,WDCP,MAGI1,LAMA3,ADCYAP1R1,GRID1,SMOC2,ZDHHC17,FAM83B,CTNNA1,NTRK2,NLK,ITGBL1,SMARCA4,CNTN1,ZNRF3,NRG3,PTPRG,BTBD11,CABIN1,FBXL17,GAS2,GRIK3,STXBP4,UNC5D,NREP,DOK5,DLG5,CPE,SPRED2,IGHV1OR15-9,SLIT2,ROR1,GLP2R,ZNF675,CSNK2A1,TRIM5,ALPK2,HECW1,ERBB4,KANK1,DMRT1,BID,MACF1,RAP1A,TRIO,PTPRE,DUSP22,CHSY1,MAML2,TRAF3,ITGA1,ITGA8,GRIK4,MAPK9,IGHV1OR21-1,CDH17,EYA1,ANKS1B,P2RX6,SLIT3,GRIN2B,ROBO1,PAK3,TNK5,OVOL2,MLLT3,LEMD3,RNF138,PRICKLE2,PRKCE,PSG9,PRKAA2,BBS2,IL1RAPL2,GRIK1,DSCAM,DGKI,SLC1A1,GRM5,EPHA6,IGF1R,NLGN1,FLRT2,PTPRO,RBMS3,INSR,ITGA9,GMDS,GPC6,RELN,CELF4,DAPK1,VAV3,CNTN6,APP,CCDC88A,PLCE1,ADAM12,PAK1,MITF,GPC5,GHR,PRDM16,KL,LTBP1,SLAMF1,WDR12,TIAM1,DISC1,SVEP1,EGF,PDGFD,FYN,EPHA7,GRIA1,TRABD2B,STK3,CNOT7,USP18,GRM1,PDE4D,PRKACB,RIMS1,POR,WWOX,FUT8,EPHB1,EFEMP1,DOCK1,FLT1,EXT1,EFNA5,NXN,STK36,AMFR,MARK2,ATF2,GRID2,ZNF423,LRP2,SEMA6D,NTF3,FER,TMEM108,GRM7,RAPGEF2,MX1,PRKCQ,PRKCH,GRIA4,IDE,APC,EPHB2,ADAMTS18,RGMB,CTNND2,NRP1,CDH13,DAB1,RFTN1,ALK,EVC2,LDLRAD4,SEMA3A,SEMA3E,MGAT5,KIF16B,CDH2,ARID5B,PIK3R3,FSTL4,NEU3,SPRED1,ADAM10,PTPRT,GLI3,NTRK3,FBN1,BMPER,PTPRK,NPHP4,PPARA,PLXNA2,PTPRD,RORA,SHISA6,PLCB1,NLRC5,MAGI2,ABI1,TRPM1,PRKD1,BCL2L1,HDAC2,TNN,SEMA3D,TGFA,PRLR,TBX20,PTPRA,MTMR2,DEPTOR,ROBO2,IFT81,ZMYND11,NEDD9,ENPP1,RIMS2,EYA4,SEMA5A,PRDM15,DCC,CHN1,NRG1,PRKCA,SEMA3C,CSF2RB,ST18 |
| GO:0051056 | regulation of small GTPase mediated signal | 4.052060046602118e-7 | GPR55,KALRN,ADCYAP1R1,MYO9A,TIAM2,ARHGAP24,SLIT2,PSD3,KANK1,TRIO,ABL2,FGD4,ROBO1,GARNL3,ARHGEF11,DGKI,DNMBP,DOCK3,RELN,RASGRF2,VAV3,PLCE1,EPS8,RASGRF1,STARD13,TIAM1,RALGPS1,ARHGAP42,NET1,ARHGAP12,RALGPS2,MAPRE2,DLCL1,AUTS2,EPHB2,DOCK2,NRP1,SIPA1L2,ARHGAP28,RALGAP2,CD2AP,SIPA1L3,SCAI,RASGRP1,SRGAP3,AKAP13,RALGAP1,CHN1,NRG1                                                                                                                                                                                                                                                                                                                                                                                                                                                                                                                                                                                                                                                                                                                                                                                                                                                                                                                                                                                                                                                                                                                                                                        |



|            |                                                           |                          |                                                                                                                                                                                                                                                                                                                                                                                                                                    |
|------------|-----------------------------------------------------------|--------------------------|------------------------------------------------------------------------------------------------------------------------------------------------------------------------------------------------------------------------------------------------------------------------------------------------------------------------------------------------------------------------------------------------------------------------------------|
|            | transduction                                              |                          |                                                                                                                                                                                                                                                                                                                                                                                                                                    |
| GO:0051963 | regulation of synapse assembly                            | 4.825722129407593e-7     | SEMA4D, NEGR1, NRXN1, IL1RAPL1, NTRK2, DLG5, IL1RAPL2, NTN1, NLGN1, FLRT2, GPC6, APP, LRFN5, CLSTN2, EPHA7, EPHB1, EFNA5, LINGO2, GRID2, EPHB2, PDLIM5, NTRK3, SYNDIG1, PTPRD, ASIC2, ROBO2                                                                                                                                                                                                                                        |
| GO:0048813 | dendrite morphogenesis                                    | 5.365335499919316e-7     | SEMA4D, FBXO31, TANC2, KALRN, IL1RAPL1, HECW1, PAK3, DSCAM, NLGN1, MAP2, CUX1, RELN, PHACTR1, FYN, EPHB1, TRPC5, PPFIA2, RAPGEF2, UBE3A, EPHB2, PDLIM5, CTNND2, NRP1, SEMA3A, DCLK1, DNM3, PTPRD, ELAVL4, ABI1, DOCK10, CTNNA2                                                                                                                                                                                                     |
| GO:0099175 | regulation of postsynapse organization                    | 5.683185549628624e-7     | TANC2, KALRN, NRXN1, IL1RAPL1, GRIN2B, PAK3, DGKB, NLGN1, RELN, FYN, EPHA7, PPFIA2, GRID2, UBE3A, EPHB2, PDLIM5, CDH2, TANC1, LRFN2, NTRK3, ABHD17C, DNM3, PTPRD, NEDD9                                                                                                                                                                                                                                                            |
| GO:0098742 | cell-cell adhesion via plasma-membrane adhesion molecules | 7.141820748333678e-7     | IGSF11, CDH8, CDH11, NRXN1, IL1RAPL1, UNC5D, CRB1, CNTN4, HMCN1, CDH17, CDH18, ROBO1, DSCAM, SDK1, NLGN1, PCDH9, CDH12, GPC6, CDH4, CNTN6, CXADR, LRFN5, TENM4, PCDH7, LRRC4C, ALCAM, CLSTN2, PCDH15, PCDH11X, IGSF21, EFNA5, TENM3, GRID2, NTNG1, KIRREL3, CDH13, DAB1, CDH2, TENM2, PTPRT, PTPRD, CDH9, FAT3, ROBO2, CDH23, NRG1                                                                                                 |
| GO:0043087 | regulation of GTPase activity                             | 9.423298738262362e-7     | SEMA4D, KALRN, MYO9A, NTRK2, RASGEF1B, TIAM2, TBC1D22A, RAPGEF5, ARHGAP24, RAP1GDS1, RAP1A, TBC1D5, FGD4, GARNL3, DGKI, ARAP2, RASGRF2, VAV3, RASGRF1, RGL1, TIAM1, ASAP2, RALGPS1, ARHGAP42, ASAP1, NET1, ARHGAP12, EFNA5, RALGPS2, NTF3, MAPRE2, RAPGEF2, RABGAP1L, SIPA1L2, EVI5, MTOR, RALGAP2, SGSM1, RGS7, SIPA1L3, NTRK3, RAPGEF4, TBC1D4, DOCK9, PLXNA2, PRKG1, RASGRP1, DOCK10, RGS6, WDR41, NEDD9, RALGAP1, CHN1, TBC1D9 |
| GO:0043547 | positive regulation of GTPase activity                    | 0.0000010074490217916367 | SEMA4D, KALRN, MYO9A, RASGEF1B, TIAM2, TBC1D22A, RAPGEF5, ARHGAP24, RAP1GDS1, RAP1A, TBC1D5, GARNL3, ARAP2, RASGRF2, RASGRF1, RGL1, TIAM1, ASAP2, RALGPS1, ARHGAP42, ASAP1, NET1, RALGPS2, NTF3, MAPRE2, RAPGEF2, RABGAP1L, SIPA1L2, EVI5, RALGAP2, SGSM1, RGS7, SIPA1L3, NTRK3, RAPGEF4, TBC1D4, DOCK9, RASGRP1, DOCK10, RGS6, WDR41, NEDD9, RALGAP1, CHN1, TBC1D9                                                                |
| GO:0007215 | glutamate reception                                       | 0.000001351743403560851  | GRIK2, GRIN2A, GRID1, GRIK3, GRIK4, GRIN2B, GRIK1, SLC1A1, GRM5, APP, FYN, GRIA1, GRM1, GRID2, GRM7, GRIA4, PLCB1, TRPM1                                                                                                                                                                                                                                                                                                           |

|                |                                                                                          |                                  |                                                                                                                                                                                                                                                                                                                                                                                                                                                                                                                                                                                                                                                                                                                                                                                                                                                                                                                                                                                                                                                                                                                                                                                                                                                                                                                                                                                                                                                                                                                                                                                                                                                                                                                                                                                                                                                                           |
|----------------|------------------------------------------------------------------------------------------|----------------------------------|---------------------------------------------------------------------------------------------------------------------------------------------------------------------------------------------------------------------------------------------------------------------------------------------------------------------------------------------------------------------------------------------------------------------------------------------------------------------------------------------------------------------------------------------------------------------------------------------------------------------------------------------------------------------------------------------------------------------------------------------------------------------------------------------------------------------------------------------------------------------------------------------------------------------------------------------------------------------------------------------------------------------------------------------------------------------------------------------------------------------------------------------------------------------------------------------------------------------------------------------------------------------------------------------------------------------------------------------------------------------------------------------------------------------------------------------------------------------------------------------------------------------------------------------------------------------------------------------------------------------------------------------------------------------------------------------------------------------------------------------------------------------------------------------------------------------------------------------------------------------------|
|                | tor<br>signa<br>ling<br>pathw<br>ay                                                      |                                  |                                                                                                                                                                                                                                                                                                                                                                                                                                                                                                                                                                                                                                                                                                                                                                                                                                                                                                                                                                                                                                                                                                                                                                                                                                                                                                                                                                                                                                                                                                                                                                                                                                                                                                                                                                                                                                                                           |
| GO:00<br>51962 | posit<br>ive<br>regul<br>ation<br>of<br>nervo<br>us<br>syste<br>m<br>devel<br>opmen<br>t | 0.000001442<br>61640970580<br>13 | SEMA4D,FBXO31,KALRN,NRXN1,IL1RAPL1,NTRK2,TIAM2,NUMB,D<br>LG5,SLIT2,MACF1,ROBO1,PAK3,CHODL,DSCAM,GRM5,NTN1,NLGN<br>1,FLRT2,CUX1,RELN,CDH4,TENM4,CLSTN2,TIAM1,DISC1,EPHB1<br>,EFNA5,TRPC5,LINGO2,GRID2,LRP2,PRKCH,EPHB2,NRP1,MTOR,<br>GLI3,SYNDIG1,PLXNA2,PTPRD,ASIC2,HDAC2,ROBO2,SEMA5A,BC<br>L11A                                                                                                                                                                                                                                                                                                                                                                                                                                                                                                                                                                                                                                                                                                                                                                                                                                                                                                                                                                                                                                                                                                                                                                                                                                                                                                                                                                                                                                                                                                                                                                         |
| GO:00<br>98655 | catio<br>n<br>trans<br>membr<br>ane<br>trans<br>port                                     | 0.000001468<br>67825504953<br>83 | KCNMA1,SLC12A8,TRPM6,SLC8A1,KCNC1,BCL2,THADA,KCNQ5,SC<br>N11A,KCNJ6,KCNK10,FGF12,CACNG2,GRIN2A,NRXN1,NIPA2,ADC<br>YAP1R1,DPP6,ZDHHC17,KCNH1,CACNA1C,SLC24A4,CACNB2,TRPM<br>3,SLC4A4,KCNE4,KCNS3,HECW1,NOS1,HTR2C,CACNA1E,SLC40A1<br>,SLC9C1,P2RX6,ANK2,SLC1A2,GRIN2B,ITPR2,CACNA2D3,PRKCE<br>,KCNH8,SLC1A1,SLC12A1,NLGN1,SHISA9,KCNIP4,NOS1AP,CATS<br>PER2,ANK3,CNIH3,RELN,RASGRF2,DPP10,DAPK1,APP,CACNA2D1<br>,HCN1,UTRN,TSPAN13,RASGRF1,MICU1,SLC39A12,PIEZO2,FYN,<br>KCND3,ANO10,KCNN3,KCNAB1,PDE4D,ATP6V1E1,ABCC9,GSGL1,T<br>RPM7,TRPC5,AKAP6,TUSC3,MICU2,SLC39A8,KCND2,SLC24A3,EP<br>HB2,RYR3,TRDN,ATP13A3,RGS7,SLC24A2,SHISA6,SCARA5,ASIC<br>2,TRPM1,CACNG3,PRKD1,ATP8A1,RYR2,KCNH5,TMEM163,SLC39A<br>11,SLC5A1,STAC,SCN8A,KCNJ15                                                                                                                                                                                                                                                                                                                                                                                                                                                                                                                                                                                                                                                                                                                                                                                                                                                                                                                                                                                                                                                                                                                                   |
| GO:00<br>51234 | estab<br>lishm<br>ent<br>of<br>local<br>izati<br>on                                      | 0.000001488<br>48800807778<br>17 | KCNMA1,SLC12A8,SYN3,PRKCB,TRPM6,SLC8A1,KCNC1,DNAJC15,<br>SIAH3,CD38,TRAPPC9,BCL2,THADA,RSRC1,DNAH11,SLC13A4,SA<br>MM50,GRIK2,SNX25,UNC13B,KCNQ5,HEPHL1,SCN11A,ATP10A,GO<br>T2,KCNJ6,KCNK10,ZDHHC11B,TMEM241,GRIP1,APBA2,TLK1,AST<br>N2,TANC2,KIF4A,JAK2,TM9SF4,BICD1,LRP1B,ABCG8,KALRN,US<br>H2A,FGF12,CACNG2,BTBD9,SLC44A5,GRIN2A,NRXN1,IL1RAPL1,<br>WDPCP,NIPA2,SLC14A2,ADCYAP1R1,DPP6,PRELID2,GRID1,ZDHH<br>C17,KCNH1,CACNA1C,AMPH,EXOC4,HEATR5A,ANO4,BBS9,NTRK2,<br>ENTHD1,OCLN,ABCA6,TMPRSS3,CNTN1,TTC39B,ELMO1,SLC24A4,<br>GRIK3,CACNB2,NUMB,STXBP4,ESYT2,SYBU,TRPM3,GABRA5,CHRM<br>3,CPE,IGHV10R15-<br>9,PITPNC1,ABCA5,SLC4A4,KCNE4,KCNS3,ABCA13,HECW1,RAP1G<br>DS1,ERBB4,BID,MACF1,RAP1A,SLC15A5,MYOM1,EXT2,ABL2,NOS<br>1,ABCG1,SPAG16,HTR2C,CACNA1E,TBC1D5,SLC40A1,SLC03A1,G<br>ABRR2,PIK3C3,SLC9C1,SNAP25-<br>AS1,CORO2B,ITGA8,GRIK4,GABRG1,IGHV10R21-<br>1,CDH17,SV2B,P2RX6,PLS1,ANK2,PLA2G4A,SLC1A2,ANO2,GRIN<br>2B,TNKS,NDFIP2,GABRA2,CSE1L,FCHSD2,ITPR2,TRAPPC10,EHB<br>P1,CACNA2D3,PRKCE,CD163,BBS2,PTPRN2,KCNH8,GRIK1,DGKI,<br>RIN3,ANKFN1,EFHB,TRAPPC8,SLC1A1,SLC12A1,GRM5,NTN1,IGF<br>1R,SNX30,NLGN1,DNAH9,SHISA9,CORIN,MON2,MAP2,KCNIP4,CF<br>TR,CAMK1D,NOS1AP,ZDHHC14,NKAIN2,INSR,CLEC16A,CATSPER2<br>,CUX1,ANK3,SV2C,CNIH3,RELN,RASGRF2,MFSD9,DPP10,OCA2,D<br>APK1,VAV3,CLIC6,APP,FBLN5,CCDC88A,PAK1,ATP9B,IGF2BP3,<br>CACNA2D1,HCN1,CHRM5,CXADR,UTRN,CECR2,TSPAN13,GHR,RASG<br>RF1,RIN2,USP7,RBFOX1,SCP2,MICU1,SLAMF1,NKAIN3,SLC25A2<br>1,SORCS2,SLC39A12,OSBPL10,PIEZO2,SLC35F1,VTI1A,EGF,FY<br>N,FAM3B,KCND3,IFT43,NSG2,GRIA1,SPIDR,STK3,ANO10,MSR1,<br>AP2B1,ARHGAP12,GABRG3,KCNN3,KCNAB1,GRM1,PDE4D,ERC2,RI<br>MS1,ATP6V1E1,FRMD4A,MCTP2,MIPEP,ABCC9,SNAP29,GSGL1,DO<br>CK1,TRPM7,EXT1,EFNA5,ABCA10,STK36,TRPC5,ATP9A,PPF1A2,<br>AKAP6,VPS37A,ATF2,TUSC3,CCDC91,GRID2,LRP2,C2,NTF3,FER<br>,ARFGAP3,MICU2,TMEM108,GABRB3,GRM7,SLC39A8,IMMP2L,ATX |

|            |                                           |                          |                                                                                                                                                                                                                                                                                                                                                                                                                                                                                                                                                                                                                                                                                                                                                                                                                                                                                                         |
|------------|-------------------------------------------|--------------------------|---------------------------------------------------------------------------------------------------------------------------------------------------------------------------------------------------------------------------------------------------------------------------------------------------------------------------------------------------------------------------------------------------------------------------------------------------------------------------------------------------------------------------------------------------------------------------------------------------------------------------------------------------------------------------------------------------------------------------------------------------------------------------------------------------------------------------------------------------------------------------------------------------------|
|            |                                           |                          | N1 ,GABRG2 ,NRXN3 ,RABGAP1L ,NSG1 ,KCND2 ,ATP8A2 ,SLC24A3 ,UBE3A ,GRIA4 ,EPHB2 ,STON1 -GTF2A1L ,SYT16 ,ERC1 ,MCTP1 ,RZR3 ,NBAS ,SETD2 ,PACSIN2 ,DOCK2 ,NUP214 ,TRIM23 ,FLVCR1 ,NRP1 ,CDH13 ,TRDN ,SLC2A13 ,RFTN1 ,EXOC6B ,ATP13A3 ,STOML1 ,DCLK1 ,KIF16B ,CDH2 ,EVI5 ,VPS41 ,MAP2K6 ,GABRB1 ,SH3KBP1 ,CADPS ,NEU3 ,RGS7 ,CD2AP ,SLC44A1 ,AP5M1 ,ADAM10 ,ABCB5 ,SLC24A2 ,GLI3 ,CHKA ,RAB31 ,VPS13D ,RAPGEF4 ,TMPRSS2 ,TMPRSS15 ,MX2 ,NSUN2 ,SORCS1 ,TBC1D4 ,DNM3 ,SYT1 ,SYNDIG1 ,DLG2 ,PPARA ,SCFD2 ,SHISA6 ,SCARA5 ,LOXL2 ,RASGRP1 ,STXBP6 ,DMBT1 ,MAGI2 ,STX12 ,ASIC2 ,RALA ,GNPTAB ,TRPM1 ,CACNG3 ,PRKD1 ,ATP8A1 ,BCL2L1 ,MICAL3 ,RANBP17 ,RZR2 ,LDLRAD3 ,PRLR ,MTMR2 ,KCNH5 ,TMEM163 ,IPO11 ,IL16 ,IFT81 ,OSCP1 ,CDH23 ,AKAP13 ,WDR41 ,MYRIP ,SLC39A11 ,ENPP1 ,UNC13C ,RIMS2 ,SLC5A1 ,STAC ,SCN8A ,RAB27A ,AGAP1 ,PARD3B ,VPS13C ,KCNJ15 ,PARD3 ,NRG1 ,SLC25A48 ,ATP10B ,SLC35F4 ,FMN2 ,PCNT ,OSBPL5 |
| GO:0043085 | positive regulation of catalytic activity | 0.0000016688997929059044 | CD44 ,PARN ,SEMA4D ,TAOK3 ,GPR55 ,BCL2 ,IL6R ,JAK2 ,KALRN ,GRI N2A ,NRXN1 ,ADCYAP1R1 ,CACNA1C ,MYO9A ,NTRK2 ,RASGEF1B ,TIAM2 ,NRG3 ,TBC1D22A ,RAPGEF5 ,ARHGAP24 ,ROR1 ,RAP1GDS1 ,ERBB4 ,BID ,MNAT1 ,RAP1A ,ABL2 ,MAP3K5 ,NOS1 ,TBC1D5 ,ITGA1 ,GRIN2B ,ROBO1 ,GARNL3 ,TNKS ,BCL2L13 ,DCUN1D4 ,SLC1A1 ,GRM5 ,EPHA6 ,ARAP2 ,IGF1R ,NOS1AP ,INSR ,EGLN3 ,DOCK3 ,RELN ,RASGRF2 ,DAPK1 ,VAV3 ,APP ,CCDC88A ,PAK1 ,GHR ,RASGRF1 ,RGL1 ,TIAM1 ,PRIM2 ,ASAP2 ,RALGPS1 ,ARHGAP42 ,ASAP1 ,EGF ,PDGFD ,FYN ,XRCC4 ,EPHA7 ,STK3 ,NET1 ,ESR1 ,POR ,EPHB1 ,FLT1 ,EFNA5 ,CDC14B ,MARK2 ,RALGPS2 ,NTF3 ,MAPRE2 ,RAPGEF2 ,PRKCQ ,RABGAP1L ,DLC1 ,EPHB2 ,MOB3B ,NBN ,RFC3 ,DAB1 ,ALK ,SIP1L2 ,EVI5 ,MAP2K6 ,MTOR ,RALGAPA2 ,FBLN1 ,SGSM1 ,RGS7 ,SIP1L3 ,NTRK3 ,RXFP1 ,RAPGEF4 ,HMGA2 ,TBC1D4 ,DOCK9 ,RASGRP1 ,MAGI2 ,ABI1 ,DOCK10 ,PRKD1 ,TGFA ,PRLR ,RGS6 ,AKAP13 ,WDR41 ,NEDD9 ,RALGAPA1 ,CHN1 ,NRG1 ,TBC1D9 ,ST18       |
| GO:0040007 | growth                                    | 0.0000017347295885741643 | SEMA4D ,EVC ,TEAD1 ,CD38 ,BCL2 ,IGSF11 ,SORBS2 ,APBA2 ,EPB41L3 ,CTDP1 ,SMARCA4 ,NRG3 ,GAS2 ,MTPN ,PTGFRN ,SLIT2 ,CSNK2A1 ,ERBB4 ,ATRX ,MACF1 ,RAD51B ,RERG ,RUNX1 ,PLS1 ,SLC1A2 ,SLIT3 ,CPQ ,ARHGEF11 ,BBS2 ,DSCAM ,NTN1 ,MAP2 ,INSR ,COBL ,CDH4 ,TNR ,APP ,FBLN5 ,SPOCK1 ,PLCE1 ,CXADR ,TENM4 ,GHR ,ALCAM ,RAR ,DISC1 ,FMN1 ,ZFPM2 ,EPHA7 ,STK3 ,NET1 ,PCDH15 ,ESR1 ,RIMS1 ,POR ,EXT1 ,EFNA5 ,TRPC5 ,FTO ,AKAP6 ,ATF2 ,SEMA6D ,TMEM108 ,PRKCQ ,ATP8A2 ,UBE3A ,INO80 ,AUTS2 ,PDLIM5 ,NBN ,FLVCR1 ,NRP1 ,RFTN1 ,SEMA3A ,SEMA3E ,DCLK1 ,ARID5B ,FSTL4 ,MTOR ,NCAPG2 ,ADAM10 ,PPA2 ,GLI3 ,HMGA2 ,SYT1 ,SCAPER ,PPARA ,PLCB1 ,MAGI2 ,BCL2L1 ,TNN ,SEMA3D ,PRLR ,TBX20 ,EYS ,VCL ,AKAP13 ,NEDD9 ,ENPP1 ,RIMS2 ,SEMA5A ,BCL11A ,DCC ,NRG1 ,SEMA3C                                                                                                                                                             |
| GO:0030334 | regulation of cell migration              | 0.0000018629977460296157 | PTPRR ,SEMA4D ,SLC8A1 ,FBXO31 ,BCL2 ,IL6R ,JAK2 ,LAMA1 ,WDPCP ,LAMA3 ,SMOC2 ,SRGAP2B ,MEOX2 ,NRG3 ,PTPRG ,NUMB ,UNC5D ,DLG5 ,SLIT2 ,AKT3 ,ERBB4 ,KANK1 ,MACF1 ,DUSP22 ,ABL2 ,ROBO1 ,PAK3 ,PRKCE ,RIN3 ,NTN1 ,LDB2 ,IGF1R ,JAM2 ,CAMK1D ,FLRT2 ,INSR ,RELN ,TNR ,APP ,PAK1 ,MITF ,RIN2 ,FRMD5 ,STARD13 ,SLAMF1 ,TIAM1 ,PHACTR1 ,EGF ,PDGFD ,DOCK4 ,DOCK1 ,FLT1 ,HDAC4 ,SEMA6D ,NTF3 ,FER ,NTNG1 ,MAPRE2 ,RAPGEF2 ,NAV3 ,DLC1 ,APC ,EPHB2 ,MCTP1 ,NRP1 ,CDH13 ,DACH1 ,LDLRAD4 ,SEMA3A ,SEMA3E ,MGAT5 ,HDAC9 ,PIK3R3 ,MTOR ,FBLN1 ,SPRED1 ,ADAM10 ,SCAI ,PTPRT ,NTRK3 ,BMPER ,PTPRK ,PLXNA2 ,PLCB1 ,PRKG1 ,MAGI2 ,DOCK10 ,PRKD1 ,ATP8A1 ,HDAC2 ,ETS1 ,TNN ,SEMA3D ,VCL ,SRGAP3 ,NEDD9 ,SEMA5A ,CTNNA2 ,NRG1 ,PRKCA ,SEMA3C                                                                                                                                                                                 |
| GO:0050919 | negative chemotaxis                       | 0.000001933602816448607  | SEMA4D ,NRG3 ,SLIT2 ,SLIT3 ,ROBO1 ,NTN1 ,FLRT2 ,EPHA7 ,EFNA5 ,SEMA6D ,SEMA3A ,SEMA3E ,SEMA3D ,ROBO2 ,SEMA5A ,NRG1 ,SEMA3C                                                                                                                                                                                                                                                                                                                                                                                                                                                                                                                                                                                                                                                                                                                                                                               |
| GO:0040012 | regulation of locomotion                  | 0.00000261648848334992   | PTPRR ,SEMA4D ,SLC8A1 ,FBXO31 ,BCL2 ,IL6R ,JAK2 ,LAMA1 ,WDPCP ,LAMA3 ,SMOC2 ,CTNNA1 ,SRGAP2B ,MEOX2 ,NRG3 ,PTPRG ,NUMB ,UNC5D ,DLG5 ,SLIT2 ,AKT3 ,ERBB4 ,KANK1 ,MACF1 ,DUSP22 ,ABL2 ,SPOCK3 ,ROBO1 ,PAK3 ,PRKCE ,BBS2 ,DSCAM ,RIN3 ,GRM5 ,NTN1 ,LDB2 ,IGF1R ,JAM2 ,CAMK1D ,FLRT2 ,PTPRO ,INSR ,RELN ,TNR ,APP ,PAK1 ,MITF ,RIN2 ,FRMD5 ,STARD13 ,SLAMF1 ,TIAM1 ,PHACTR1 ,EGF ,PDGFD ,DOCK4 ,DOCK1 ,FLT1 ,HDAC4 ,SEMA6D ,NTF3 ,FER ,NTNG1 ,MAPRE2 ,R                                                                                                                                                                                                                                                                                                                                                                                                                                                     |

|            |                             |                          |                                                                                                                                                                                                                                                                                                                                                                                                                                                                                                                                                                                                                                                                                                                                                                                                                                                                                                                                                                                                                                                                                                                                                                                                                                                                                                                                                                              |
|------------|-----------------------------|--------------------------|------------------------------------------------------------------------------------------------------------------------------------------------------------------------------------------------------------------------------------------------------------------------------------------------------------------------------------------------------------------------------------------------------------------------------------------------------------------------------------------------------------------------------------------------------------------------------------------------------------------------------------------------------------------------------------------------------------------------------------------------------------------------------------------------------------------------------------------------------------------------------------------------------------------------------------------------------------------------------------------------------------------------------------------------------------------------------------------------------------------------------------------------------------------------------------------------------------------------------------------------------------------------------------------------------------------------------------------------------------------------------|
|            |                             |                          | APGEF2, NAV3, DLC1, APC, EPHB2, MCTP1, NRP1, CDH13, DACH1, LDLRAD4, SEMA3A, SEMA3E, MGAT5, HDAC9, PIK3R3, MTOR, FBLN1, SPRED1, ADAM10, SCAI, PTPRT, NTRK3, BMPER, PTPRK, PLXNA2, PLCB1, PRKG1, MAGI2, DOCK10, PRKD1, ATP8A1, HDAC2, ETS1, TNN, SEMA3D, IL16, VCL, ROBO2, SRGAP3, NEDD9, SEMA5A, CTNNA2, NRG1, PRKCA, SEMA3C                                                                                                                                                                                                                                                                                                                                                                                                                                                                                                                                                                                                                                                                                                                                                                                                                                                                                                                                                                                                                                                  |
| GO:0009888 | tissue development          | 0.0000029558057577097765 | CD44, SEMA4D, EVC, SLC8A1, ANKRD6, BCL2, COL18A1, THRB, IL6R, SORBS2, ASTN2, RCAN1, NTN4, JAK2, USH2A, LAMA1, WPCP, LAMA3, CTDSP1, EXOC4, MYO9A, ZNRF3, MEOX2, SLC24A4, FBXL17, MTPN, SOX6, DLG5, PGM5, ATRNL1, ARHGAP24, SPRED2, SLIT2, MYLK3, ROR1, KAZN, ALPK2, LCE1F, ERBB4, ATRX, DMRT1, RAP1A, RAD51B, CHSY1, EXT2, SLC40A1, ETS2, ITGA8, RUNX1, ALDH1A2, EYA1, FRMD6, PLS1, ZBTB16, ROBO1, EGFLAM, OVOL2, MLLT3, PRICKLE2, BBS2, SOX5, NTN1, NR5A2, LDB2, WDR72, SHROOM3, ALX4, CFTR, PTPRO, INSR, COBL, GPC6, TRPS1, MYO18B, PAK1, CXADR, TENM4, CECR2, GHR, RIPK4, RBOX1, STARD13, KL, ADAMTS16, NEBL, RARB, TIAM1, PBX1, FMN1, ZFPM2, SVEP1, EDAR, EGF, PDGFR, EPHA7, STK3, COL19A1, TOX, PCDH15, ESR1, ARHGAP12, SGCZ, PDE4D, PRKACB, POR, CERS3, EPHB1, FHOD3, GREB1L, EFEMP1, AJAP1, EXT1, HDAC4, FTO, AKAP6, ATF2, LRP2, SEMA6D, FER, NTNG1, SGCD, RAPGEF2, CPS1, PRKCH, KRT25, DLC1, SLC24A3, PDLIM5, COL22A1, SETD2, NRP1, LDLRAD4, SEMA3A, SEMA3E, KIF16B, CDH2, ARID5B, SERPINB7, HDAC9, MTOR, FHL2, SPRED1, SIPA1L3, FLNB, CSMD1, GLI3, RXFP1, SGCG, HYDIN, BMPER, HMGA2, NSUN2, PPARA, PLXNA2, MYH15, PLCB1, LOXL2, BPTF, DMBT1, MAGI2, NELL1, ABI1, RALA, FNDC3A, HDAC2, TNN, RYR2, SEMA3D, PRLR, TBX20, VCL, ROBO2, CDH23, AKAP13, ENPP1, HIVEP3, SEMA5A, NRG1, SEMA3C                                                                                 |
| GO:0032879 | regulation of localization  | 0.0000034064761865128426 | KCNMA1, PARN, PRKCB, SLC8A1, KCNC1, SIAH3, CD38, BCL2, THADA, UNC13B, KCNQ5, SCN11A, KCNJ6, KCNK10, APBA2, ASTN2, JAK2, TM9SF4, BICD1, ABCG8, KALRN, FGF12, CACNG2, BTBD9, GRIN2A, NRXN1, IL1RAPL1, WPCP, ADCYAP1R1, DPP6, KCNH1, CACNA1C, CTNNA1, OCLN, CNTN1, TTC39B, CACNB2, NUMB, STXBP4, CHRM3, ABCA5, KCNE4, TRIM5, KCNS3, ABCA13, HECW1, RAP1GDS1, ERBB4, RAP1A, MYO1, ABL2, NOS1, ABCG1, HTR2C, CACNA1E, TBC1D5, PIK3C3, CORO2B, PLS1, ANK2, PLA2G4A, SLC1A2, GRIN2B, NDFIP2, ITPR2, CACNA2D3, PRKCE, PRKAA2, KCNH8, DGKI, RIN3, EFHB, SLC1A1, GRM5, NLGN1, SHISA9, CORIN, MAP2, KCNIP4, CFTR, CAMK1D, NOS1AP, NKAIN2, INSR, CATSPER2, ANK3, CNIH3, GPC6, RELN, RASGRF2, DPP10, DAPK1, VRK1, CLIC6, APP, CDC88A, CACNA2D1, HCN1, UTRN, GPC5, TSPAN13, RASGRF1, USP7, SCP2, SLAMF1, NKAIN3, EGF, FYN, KCND3, SPIDR, MSR1, KCNAB1, PDE4D, RIMS1, FRMD4A, MCTP2, ABCC9, GSG1L, EFNA5, ATP9A, FTO, AKAP6, C2, NTF3, FER, GRM7, PRKCH, NRXN3, RABGAP1L, KCND2, ATP8A2, APC, EPHB2, MCTP1, RYR3, SETD2, PACSIN2, DOCK2, NUP214, NRP1, CDH13, TRDN, DCLK1, CDH2, SYCP1, MAP2K6, CADPS, NEU3, RGS7, CD2AP, ADAM10, GLI3, RAB31, ABHD17C, RAPGEF4, BMPER, MX2, NSUN2, TBC1D4, DNM3, SYT1, PPARA, SHISA6, STXBP6, MAGI2, ASIC2, RALA, CACNG3, PRKD1, ATP8A1, BCL2L1, RYR2, TMTR2, KCNH5, IL16, VCL, WDR41, NEDD9, MYRIP, ENPP1, RIMS2, STAC, SCN8A, RAB27A, KCNJ15, NRG1, PCNT |
| GO:0003013 | circulatory system process  | 0.000003668343439450794  | KCNMA1, SLC8A1, CD38, THRB, JAK2, FGF12, FLI1, TRHDE, RPS6KA2, CACNA1C, OCLN, ENPEP, CACNB2, CHRM3, SLIT2, MYLK3, SLC4A4, KCNE4, RAP1GDS1, EXT2, NOS1, SLC3A1, ITGA1, CORO2B, ANK2, SLC1A2, BBS2, SLC1A1, CORIN, NOS1AP, PTPRO, INSR, NRNS, CACNA2D1, HCN1, CXADR, KL, ADAMTS16, ARHGAP42, VSTM4, SVEP1, FYN, KCND3, NAV2, SGCZ, PDE4D, PDE3A, DOCK4, ABCC9, EXT1, HDAC4, LRP2, CELF2, SGCD, IMMP2L, CPS1, SLC24A3, TRDN, SLC2A13, ASB3, MAP2K6, MTOR, SLC44A1, SGCG, CTNNA3, PPARA, PRKG1, ASIC2, ATP8A1, RYR2, TBX20, AKAP13, SLC5A1                                                                                                                                                                                                                                                                                                                                                                                                                                                                                                                                                                                                                                                                                                                                                                                                                                       |
| GO:0098660 | inorganic ion transmembrane | 0.0000049332839461575835 | KCNMA1, SLC12A8, TRPM6, SLC8A1, KCNC1, BCL2, THADA, SLC13A4, KCNQ5, SCN11A, KCNJ6, KCNK10, FGF12, CACNG2, GRIN2A, NIPA2, ADCYAP1R1, DPP6, ZDHHC17, KCNH1, CACNA1C, ANO4, SLC24A4, CACNB2, TRPM3, GABRA5, SLC4A4, KCNE4, KCNS3, HECW1, NOS1, HTR2C, CACNA1E, SLC40A1, GABRR2, SLC9C1, GABRG1, ANK2, ANO2, GRIN2B, GABRA2, ITPR2, CACNA2D3, PRKCE, KCNH8, SLC1A1, SLC12A1, GRM5, KCNIP4, CFTR, NOS1AP, CATSPER2, ANK3, DPP10, CLIC6, CACNA2D1, HCN1, UTRN, TSPAN13, MICU1, SLC39A12, FYN, KCND3, ANO10, GA                                                                                                                                                                                                                                                                                                                                                                                                                                                                                                                                                                                                                                                                                                                                                                                                                                                                     |

|            |                                                                                     |                          |                                                                                                                                                                                                                                                                                                                                                                                                                                                                                                                                                                                                                                                                                                                                                                                                                                                                                                                                                                                                                                                                                                                                                                                                                                                                                                                                                            |
|------------|-------------------------------------------------------------------------------------|--------------------------|------------------------------------------------------------------------------------------------------------------------------------------------------------------------------------------------------------------------------------------------------------------------------------------------------------------------------------------------------------------------------------------------------------------------------------------------------------------------------------------------------------------------------------------------------------------------------------------------------------------------------------------------------------------------------------------------------------------------------------------------------------------------------------------------------------------------------------------------------------------------------------------------------------------------------------------------------------------------------------------------------------------------------------------------------------------------------------------------------------------------------------------------------------------------------------------------------------------------------------------------------------------------------------------------------------------------------------------------------------|
|            | trans<br>port                                                                       |                          | BRG3, KCNN3, KCNAB1, PDE4D, ATP6V1E1, ABCC9, TRPM7, TRPC5, AKAP6, TUSC3, MICU2, GABRB3, SLC39A8, GABRG2, KCND2, SLC24A3, RYR3, TRDN, GABRB1, RGS7, SLC24A2, SCARA5, ASIC2, TRPM1, CACNG3, PRKD1, RYR2, KCNH5, TMEM163, SLC39A11, SLC5A1, STAC, SCN8A, KCNJ15                                                                                                                                                                                                                                                                                                                                                                                                                                                                                                                                                                                                                                                                                                                                                                                                                                                                                                                                                                                                                                                                                               |
| GO:0006811 | ion<br>trans<br>port                                                                | 0.0000050622474593984704 | KCNMA1, SLC12A8, PRKCB, TRPM6, SLC8A1, KCNC1, BCL2, THADA, SLC13A4, GRIK2, KCNQ5, HEPHL1, SCN11A, ATP10A, KCNJ6, KCNK10, FGF12, CACNG2, SLC44A5, GRIN2A, NRXN1, NIPA2, ADCYAP1R1, DPP6, GRID1, ZDHHC17, KCNH1, CACNA1C, ANO4, NTRK2, CNTN1, SLC24A4, GRIK3, CACNB2, TRPM3, GABRA5, CHRM3, SLC4A4, KCNE4, KCNS3, HECW1, NOS1, HTR2C, CACNA1E, SLC40A1, SLCO3A1, GABRR2, SLC9C1, GRIK4, GABRG1, P2RX6, ANK2, PLA2G4A, SLC1A2, ANO2, GRIN2B, NDFIP2, GABRA2, ITPR2, CACNA2D3, PRKCE, KCNH8, GRIK1, EFHB, SLC1A1, SLC12A1, GRM5, NLGN1, SHISA9, KCNIP4, CFTR, NOS1AP, NKA1N2, CATSPER2, ANK3, CNIH3, RELN, RASGRF2, DPP10, DAPK1, CLIC6, APP, CACNA2D1, HCN1, CHRM5, UTRN, TSPAN13, RASGRF1, MICU1, NKAIN3, SLC25A21, SLC39A12, PIEZO2, EGF, FYN, KCND3, GRIA1, ANO10, GABRG3, KCNN3, KCNAB1, GRM1, PDE4D, ATP6V1E1, ABCC9, GSGL1L, TRPM7, TRPC5, AKAP6, TUSC3, GRID2, LRP2, MICU2, GABRB3, GRM7, SLC39A8, GABRG2, KCND2, SLC24A3, GRIA4, EPHB2, RYR3, FLVCR1, TRDN, ATP13A3, MAP2K6, GABRB1, RGS7, SLC44A1, SLC24A2, SYT1, SHISA6, SCARA5, ASIC2, TRPM1, CACNG3, PRKD1, ATP8A1, RYR2, KCNH5, TMEM163, IL16, CDH23, SLC39A11, ENPP1, SLC5A1, STAC, SCN8A, KCNJ15                                                                                                                                                                                               |
| GO:1902531 | regul<br>ation<br>of<br>intra<br>cellu<br>lar<br>signa<br>l<br>trans<br>ducti<br>on | 0.000006261882224898572  | CD44, PTPRR, SEMA4D, TAOK3, PRKCB, ANKRD6, GPR55, BCL2, CAMTA1, IL6R, BRD4, NDRG2, RCAN1, JAK2, OTUD7A, TPTE2, KALRN, NFAT5, NRXN1, ADCYAP1R1, ZDHHC17, MYO9A, NTRK2, TIAM2, IQCJ-SCHIP1, RNF152, SLC24A4, PDE10A, MECOM, SHANK2, DOK5, DLG5, ARHGAP24, SPRED2, SLIT2, ROR1, ZNF675, AKT3, TRIM5, PSD3, RAP1GDS1, ERBB4, KANK1, BID, RAP1A, TRIO, DUSP22, ABL2, MAP3K5, HTR2C, TRAF3, FGD4, ITGA1, ROBO1, PAK3, GARNL3, NDFIP2, SGMS1, LEMD3, PRKCE, ARHGEF11, PRKAA2, DGKI, DNMBP, EFHB, GRM5, IGF1R, NLGN1, NOS1AP, INSR, CLEC16A, DOCK3, RELN, RASGRF2, STK38, VAV3, APP, PUM1, PLCE1, PAK1, EPS8, GHR, RASGRF1, USP7, STARD13, KL, SLAMF1, TIAM1, RALGPS1, ARHGAP42, EDAR, EGF, PDGFD, FYN, EPHA7, STK3, S100B, NET1, ESR1, ARHGAP12, GRM1, PDE4D, PDE3A, EPHB1, FLT1, AKAP6, LRP2, RALGPS2, NTF3, MAPRE2, TPTE, RAPGEF2, DLC1, UBE3A, AUTS2, EPHB2, AGO3, MOB3B, DOCK2, NRP1, CDH13, ALK, SEMA3A, SEMA3E, MAGI3, CDH2, SIPA1L2, MAP2K6, ARHGAP28, MTOR, KSR1, RALGAPA2, FBLN1, FHL2, CD2AP, SPRED1, SIPA1L3, SCAI, NTRK3, BMPER, APIP, PPARA, RORA, PLCB1, RASGRP1, MAGI2, PRKD1, BCL2L1, TGFA, DEPTOR, ZMYND11, SRGAP3, AKAP13, RALGAPA1, SEMA5A, PRDM15, CHN1, NRG1, PRKCA                                                                                                                                                                          |
| GO:0048518 | posit<br>ive<br>regul<br>ation<br>of<br>biolo<br>gical<br>proces<br>s               | 0.000007321313656467029  | CD44, SAMD4A, KCNMA1, ZHX3, APBB2, SCAF8, ERG, PARN, SEMA4D, EVC, TEAD1, NFIA, RPS6KA5, TAOK3, PRKCB, A2M, SLC8A1, ANKRD6, KCNC1, GPR55, CD38, FBXO31, BCL2, CAMTA1, CHFR, TOX3, THRB, RAG1, CDC42EP3, GRIK2, IGSF11, UNC13B, IL6R, ZBTB20, ATP10A, BRD4, GRIPI1, JAK2, TM9SF4, BICD1, KALRN, NEGR1, FGF12, CACNG2, NFAT5, FLI1, LAMA1, ZBTB7C, GRIN2A, NRXN1, ARID1B, IL1RAPL1, MAGI1, ADCYAP1R1, RPS6KA2, SMOC2, ZDHHC17, BMF, CTNNA1, NTRK2, OCLN, TIAM2, IQCJ-SCHIP1, SMARCA4, RNF152, CNTN1, MEOX2, GLIS3, NRG3, SLC24A4, CACNB2, NUMB, STXBP4, MED15, MTPN, SOX6, MECOM, PDE4DIP, SHANK2, UBE2E2, DOK5, DLG5, CHRM3, SPRED2, IGHV1OR15-9, SLIT2, MYLK3, ABCA5, ROR1, GLP2R, SLC4A4, CSNK2A1, AKT3, KMT2C, TRIM5, ABCA13, HECW1, ERBB4, KANK1, ATRX, DMRT1, BID, MACF1, MNAT1, TAF4B, RAP1A, CTNBNL1, RAD51B, DUSP22, CHSY1, MYOM1, ABL2, MAP3K5, NOS1, ABCG1, MAML2, HTR2C, NEK4, CTIF, TBC1D5, SLC40A1, SLCO3A1, TRAF3, CHD6, ETS2, ITGA1, TCF12, ZNF721, CORO2B, ITGA8, RBM19, RUNX1, ALDH1A2, MAPK9, ESRRG, PTGFR, IGHV1OR21-1, CDH17, EYA1, MORC3, PLS1, SPON1, ANK2, PLA2G4A, SLC1A2, ZBTB16, SUPT3H, GRIN2B, ROBO1, EGFLAM, PAK3, TNKS, KLF12, NDFIP2, OVOL2, FCHSD2, BRINP1, MLLT3, BCL2L13, CHODL, GABPA, PRKCE, GLIS1, PSG9, ARHGEF11, PRKAA2, BBS2, EDIL3, SOX5, DSCAM, DGKI, KDM4C, DCUN1D4, SLC1A1, GRM5, EPHA6, NTN1, NR5A2, LDB2, IGF1 |

|            |                             |                         |                                                                                                                                                                                                                                                                                                                                                                                                                                                                                                                                                                                                                                                                                                                                                                                                                                                                                                                                                                                                                                                                                                                                                                                                                                                                                                                                                                                                                                                                                                                                                                                                                                                                                                                                                                                                                                                                                                                                                                                                                                                  |
|------------|-----------------------------|-------------------------|--------------------------------------------------------------------------------------------------------------------------------------------------------------------------------------------------------------------------------------------------------------------------------------------------------------------------------------------------------------------------------------------------------------------------------------------------------------------------------------------------------------------------------------------------------------------------------------------------------------------------------------------------------------------------------------------------------------------------------------------------------------------------------------------------------------------------------------------------------------------------------------------------------------------------------------------------------------------------------------------------------------------------------------------------------------------------------------------------------------------------------------------------------------------------------------------------------------------------------------------------------------------------------------------------------------------------------------------------------------------------------------------------------------------------------------------------------------------------------------------------------------------------------------------------------------------------------------------------------------------------------------------------------------------------------------------------------------------------------------------------------------------------------------------------------------------------------------------------------------------------------------------------------------------------------------------------------------------------------------------------------------------------------------------------|
|            |                             |                         | R, SNX30, NLGN1, JAM2, ALX4, CNTNAP2, MAP2, CFTR, CAMK1D, FLRT2, MLLT10, NOS1AP, RBMS3, INSR, COBL, CLEC16A, EGLN3, CUX1, ANK3, MORC2, DOCK3, RELN, RASGRF2, CDH4, TNFR, DPP10, CELF4, DAPK1, VAV3, ZNF600, VRK1, CNTN6, APP, PUM1, CCDC88A, ARNT2, HPSE2, PLCE1, ADAM12, PAK1, MITF, IGF2BP3, CACNA2D1, ADCK1, NSMCE2, ZNF208, EPS8, UTRN, GPC5, TENM4, PRR16, GHR, DUX4, RASGRF1, RIN2, PRDM16, FRMD5, RNF217, USP7, MEIS2, KIR2DL4, SCP2, KL, TASP1, SLAMF1, INO80D, CLSTN2, RARB, TCF4, TIAM1, PBX1, MLIP, PRIM2, SLC39A12, DISC1, FMN1, ZFPM2, ASAP1, FRMPD4, EDAR, EGF, PDGFD, FYN, EPHA7, TRABD2B, SPIDR, STK3, CNOT7, MSR1, PSIP1, S100B, NET1, TOX, ESR1, GRM1, PDE4D, PDE3A, RIMS1, POR, DOCK4, FRMD4A, WWOX, EPHB1, SSBP2, CREM, TNRC6B, DOCK1, FLT1, EFNA5, CDCL4B, HDAC4, ZNF717, STK36, TRPC5, FTO, AKAP6, TENM3, LINGO2, MARK2, ATF2, RBBP8, GRID2, ZNF423, LRP2, SEMA6D, C2, NTF3, FER, SUS4, CAMK4, MAPRE2, RAD51AP1, TMEM108, RAPGEF2, NAV3, PLGRKT, ZNF615, GTF2I, PRKCQ, PRKCH, DLC1, NSG1, ATP8A2, SLC24A3, UBE3A, IDE, APC, INO80, AUTS2, EPHB2, ZNF850, AGO3, C9, MOB3B, NBAS, NBN, RGM, SETD2, PKP1, DOCK2, NRP1, CDH13, RFC3, TRDN, SLC2A13, DAB1, RFTN1, ALK, SEMA3A, SEMA3E, MGAT5, NRIP1, CDH2, ARID5B, TENM2, SERPINB7, ZNF407, HDAC9, PIK3R3, MAP2K6, MTO, R, KSR1, RORB, FBLN1, ST8SIA1, BLM, SH3KBP1, CADPS, NEU3, NCAPG2, RGS7, CD2AP, SPRED1, ADAM10, KANSL1, TRERF1, SLC24A2, GLI3, NTRK3, RAB31, VPS13D, ABHD17C, ZNF292, TBX15, BMPER, ANKRD31, ZNF521, TMRSS2, ATF7IP, HMGA2, CREB5, DNMT3, SYT1, SYNDIG1, ASXL3, DPF3, NPHP4, PPARA, PLXNA2, PTPRD, RORA, PLCB1, LOXL2, BPTF, RASGRP1, ELAVL4, NLRC5, MAGI2, NELL1, ABI1, TSHZ3, ASIC2, RALA, CACNG3, PRKD1, ATP8A1, TNFAIP8, BCL2L1, HDAC2, ETS1, MRPS27, TNN, RYR2, SEMA3D, BANP, TGFA, PRLR, TBX20, MTMR2, ATF6, IL16, BACH1, ATAT1, ROBO2, AKAP13, NEDD9, MYRIP, PCP4, RIMS2, STAC, RAB27A, EYA4, POMT2, HIVEP3, CLIP1, SEMA5A, PRDM15, BCL11A, ZNF112, PVT1, ETV6, PARD3, NRG1, FANK1, ZNF845, NPAS3, PRKCA, FMN2, SEMA3C, FANCB, CSF2RB, PCNT, ST18 |
| GO:0006468 | prote in phosphorylation    | 0.000007341851893021167 | CD44, ERG, SEMA4D, RPS6KA5, TAOK3, PRKCB, TRPM6, SLC8A1, BCL2, SAMSN1, RSRC1, CDC42BPA, SNX25, MAPK10, IL6R, BRD4, TLK1, JAK2, KALRN, LAMA1, MAST4, NRXN1, RPS6KA2, NTRK2, OCLN, NLK, CNTN1, NRG3, STK32B, SPRED2, SLIT2, MYLK3, ROR1, ZNF675, CSNK2A1, AKT3, PHKB, ALPK2, ERBB4, MNAT1, TAF4B, RAP1A, TRIO, MYO3B, DUSP22, ABL2, MAP3K5, NOS1, NEK4, SLCO3A1, PIK3C3, MAPK9, PEAK1, MORC3, ROBO1, PAK3, TNKS, PRKCE, PRKAA2, MYO3A, SLC1A1, GRM5, EPHA6, IGF1R, CAMK1D, PTPRO, INSR, DOCK3, RELN, STK38, DAPK1, VRK1, APP, CCDC88A, PLCE1, PAK1, GHR, RPK4, EGF, PDGFD, FYN, EPHA7, STK3, CNOT7, PDE4D, PRKACB, HUNK, EPHB1, EFEMP1, TRPM7, FLT1, EFNA5, STK36, TRPC5, SH3BP5, MARK2, ATF2, NTF3, FER, SNRK, CAMK4, RAPGEF2, PRKCQ, PRKCH, APC, EPHB2, ERC1, MOB3B, NBN, NRP1, DAB1, ALK, LDLRAD4, DCLK1, CCNG2, PIK3R3, MAP2K6, MTO, R, STK38L, KSR1, FBLN1, BLM, NCAPG2, STK32A, SPRED1, ADAM10, PTPRT, NTRK3, CHKA, BMPER, HMGA2, PRKG1, RASGRP1, ABI1, PRKD1, HDAC2, TGFA, PRLR, PTPRA, DEPTOR, AKAP13, NEDD9, ENPP1, PARD3, NRG1, PRKCA, CSF2RB, TOP1                                                                                                                                                                                                                                                                                                                                                                                                                                                                                                                                                                                                                                                                                                                                                                                                                                                                                                                                                                                      |
| GO:2000145 | regulation of cell motility | 0.000007356448218766227 | PTPRR, SEMA4D, SLC8A1, FBXO31, BCL2, IL6R, JAK2, LAMA1, WPCP, LAMA3, SMOC2, CTNNA1, SRGAP2B, MEOX2, NRG3, PTPRG, NUMB, UNC5D, DLG5, SLIT2, AKT3, ERBB4, KANK1, MACF1, DUSP22, ABL2, SPOCK3, ROBO1, PAK3, PRKCE, BBS2, RIN3, NTN1, LDB2, IGF1R, JAM2, CAMK1D, FLRT2, INSR, RELN, TNFR, APP, PAK1, MITF, RIN2, FRMD5, STARD13, SLAMF1, TIAM1, PHACTR1, EGF, PDGFD, DOCK4, DOCK1, FLT1, HDAC4, SEMA6D, NTF3, FER, NTNG1, MAPRE2, RAPGEF2, NAV3, DLC1, APC, EPHB2, MCTP1, NRP1, CDH13, DACH1, LDLRAD4, SEMA3A, SEMA3E, MGAT5, HDAC9, PIK3R3, MTOR, FBLN1, SPRED1, ADAM10, SCAI, PTPRT, NTRK3, BMPER, PTPRK, PLXNA2, PLCB1, PRKG1, MAGI2, DOCK10, PRKD1, ATP8A1, HDAC2, ETS1, TNN, SEMA3D, VCL, SRGAP3, NEDD9, SEMA5A, CTNNA2, NRG1, PRKCA, SEMA3C                                                                                                                                                                                                                                                                                                                                                                                                                                                                                                                                                                                                                                                                                                                                                                                                                                                                                                                                                                                                                                                                                                                                                                                                                                                                                                    |
| GO:0044057 | regulation of syste         | 0.000007698443214335858 | KCNMA1, SLC8A1, CD38, THRB, IGSF11, UNC13B, SCN11A, DLGAP1, JAK2, ABCG8, FGF12, GRIN2A, NRXN1, CTDP1, CACNA1C, CACNB2, MTPN, CHRM3, KCNE4, NOS1, HTR2C, CORO2B, ANK2, GRIN2B, SLC1A1, NLGN1, SHISA9, JAM2, CORIN, NOS1AP, PTPRO, RELN, FBXO32, TNFR, CELF4, APP, RNLS, PLCE1, CACNA2D1, HCN1, CXADR, TENM4, MLIP, ARH                                                                                                                                                                                                                                                                                                                                                                                                                                                                                                                                                                                                                                                                                                                                                                                                                                                                                                                                                                                                                                                                                                                                                                                                                                                                                                                                                                                                                                                                                                                                                                                                                                                                                                                            |

|            |                                                     |                         |                                                                                                                                                                                                                                                                                                                                                                                                                                                                                                                                                                                                                                                                                                                                                                                                                                                                                                                                                                                                                                                                                                                                                                                                           |
|------------|-----------------------------------------------------|-------------------------|-----------------------------------------------------------------------------------------------------------------------------------------------------------------------------------------------------------------------------------------------------------------------------------------------------------------------------------------------------------------------------------------------------------------------------------------------------------------------------------------------------------------------------------------------------------------------------------------------------------------------------------------------------------------------------------------------------------------------------------------------------------------------------------------------------------------------------------------------------------------------------------------------------------------------------------------------------------------------------------------------------------------------------------------------------------------------------------------------------------------------------------------------------------------------------------------------------------|
|            | m<br>proce<br>ss                                    |                         | GAP42, KCND3, GRM1, PDE4D, RIMS1, DOCK4, ABCC9, HDAC4, FTO, AKAP6, CELF2, TMEM108, TRDN, ASB3, CTNNA3, PPP1R12B, PPARA, SHISA6, PRKG1, TSHZ3, ASIC2, RYR2, MTMR2, RIMS2, DLGAP2, PARD3, PRKCA                                                                                                                                                                                                                                                                                                                                                                                                                                                                                                                                                                                                                                                                                                                                                                                                                                                                                                                                                                                                             |
| GO:0044087 | regulation of cellular component biogenesis         | 0.000008776908517884329 | C10ORF90, SEMA4D, DNAJC15, CDC42EP3, UNC13B, NEGR1, NRXN1, IL1RAPL1, WDPCP, BMF, NTRK2, OCLN, MTPN, PDE4DIP, DLG5, ARHGAP24, SLIT2, KANK1, BID, MACF1, RAP1A, DUSP22, CORO2B, MAPK9, CDH17, PEAK1, PAK3, MDM1, FCHSD2, PRKCE, PRKAA2, IL1RAPL2, NTN1, LDB2, SPTB, SNX30, NLGN1, CNTNAP2, MAP2, FLRT2, COBL, MORC2, TBCD, GPC6, APP, CCDC88A, PLCE1, PAK1, EPS8, LRFN5, ADAMTS16, CLSTN2, SLC39A12, FMN1, ASAP1, EPHA7, TRABD2B, SPIDR, ESR1, EPHB1, FHOD3, EFNA5, HDAC4, LINGO2, GRID2, FER, RAPGEF2, NAV3, PRKCH, RHPN2, DLC1, APC, AUTS2, EPHB2, PDLIM5, SDCCAG8, NRP1, LDLRAD4, TENM2, VPS41, ARHGAP28, MTOR, NTRK3, ATF7IP, DNMT3, SYNDIG1, NPHP4, SACS, PTPRD, STXBP6, ASIC2, RALA, TBX20, PTPRA, VCL, ATAT1, ROBO2, CLIP1, BCL11A, NRG1, PRKCA                                                                                                                                                                                                                                                                                                                                                                                                                                                      |
| GO:0016310 | phosphorylation                                     | 0.000009088575150701139 | CD44, ERG, SEMA4D, RPS6KA5, TAOK3, PRKCB, TRPM6, SLC8A1, BCL2, SAMSN1, RSRC1, CDC42BPA, SNX25, MAPK10, IL6R, ZBTB20, BRD4, TLK1, JAK2, KALRN, LAMA1, MAST4, NRXN1, RPS6KA2, CKMT1B, NTRK2, OCLN, AK8, NLK, CNTN1, NRG3, STK32B, SPRED2, SLIT2, MYLK3, ROR1, SLC4A4, ZNF675, CSNK2A1, AKT3, PHKB, ALPK2, ERBB4, MNAT1, TAF4B, RAP1A, TRIO, MYO3B, DUSP22, ABL2, MAP3K5, NOS1, NEK4, SLC3A1, PIK3C3, MAPK9, PEAK1, MORC3, AKAP10, ROBO1, PAK3, DGKB, TNKS, SGMS1, DGKK, PRKCE, PRKAA2, MYO3A, DSCAM, DGKI, NME7, SLC1A1, GRM5, EPHA6, LDB2, IGF1R, CAMK1D, PTPRO, INSR, DOCK3, RELN, STK38, DAPK1, VAV3, VRK1, APP, CCDC88A, PLCE1, PAK1, ADCY1, GHR, RIPK4, EGF, PDGFD, FYN, EPHA7, STK3, CNOT7, PDE4D, PRKACB, HUNK, EPHB1, EFEMP1, TRPM7, FLT1, EFNA5, HDAC4, STK36, TRPC5, SH3BP5, MARK2, ATF2, NTF3, FER, SNRK, CAMK4, RAPGEF2, PRKCQ, PRKCH, APC, EPHB2, ERC1, MOB3B, NBN, NRP1, DAB1, ALK, LDLRAD4, DCLK1, CCNG2, PIK3R3, MAP2K6, MTOR, STK38L, KSR1, FBLN1, BLM, SH3KBP1, NCAPG2, STK32A, SPRED1, ADAM10, PTPRT, NTRK3, CHKA, BMPEP, HMGA2, PPARA, PRKG1, RASGRP1, NLRC5, MAGI2, ABI1, GNPTAB, PRKD1, ADK, HDAC2, TGFA, PRLR, PTPRA, DEPTOR, AKAP13, NEDD9, ENPP1, PARD3, NRG1, PRKCA, CSF2RB, TOP1 |
| GO:0006935 | chemotaxis                                          | 0.000010236456488778686 | SEMA4D, RPS6KA5, NCAM1, IL6R, KALRN, LAMA1, NRXN1, LAMA3, SMO C2, CNTN1, NRG3, UNC5D, SLIT2, ADAMTSL1, TRIO, CCDC141, CNTN4, ITGA1, SLIT3, ROBO1, DSCAM, RIN3, EPHA6, NTN1, CAMK1D, FLRT2, PTPRO, ITGA9, RELN, CDH4, TNFR, VAV3, CNTN6, APP, CXADR, ALCAM, SLAMF1, PDGFD, FYN, EPHA7, CNTN5, DOCK4, EPHB1, FLT1, EXT1, EFNA5, SEMA6D, NTF3, FER, PLGRKT, PRKCQ, NRXN3, EPHB2, PRTG, DOCK2, NRP1, CDH13, SEMA3A, SEMA3E, ADAM10, GLI3, NTRK3, PLXNA2, RALA, PRKD1, SEMA3D, IL16, ROBO2, NEDD9, SEMA5A, DCC, CHN1, NRG1, SEMA3C                                                                                                                                                                                                                                                                                                                                                                                                                                                                                                                                                                                                                                                                             |
| GO:0031345 | negative regulation of cell projection organization | 0.00001083984559169229  | SEMA4D, CD38, NRXN1, PTPRG, ARHGAP24, SLIT2, KANK1, GRIN2B, NTN1, NLGN1, MAP2, PTPRO, TNFR, SPOCK1, FYN, EPHA7, TRPC5, SEMA6D, RAPGEF2, UBE3A, EPHB2, NRP1, DAB1, SEMA3A, SEMA3E, FSTL4, DNMT3, HDAC2, SEMA3D, FAT3, SEMA5A, BCL11A, DCC, SEMA3C                                                                                                                                                                                                                                                                                                                                                                                                                                                                                                                                                                                                                                                                                                                                                                                                                                                                                                                                                          |
| GO:0042330 | taxis                                               | 0.000011772362197277484 | SEMA4D, RPS6KA5, NCAM1, IL6R, KALRN, LAMA1, NRXN1, LAMA3, SMO C2, CNTN1, NRG3, UNC5D, SLIT2, ADAMTSL1, TRIO, CCDC141, CNTN4, ITGA1, SLIT3, ROBO1, DSCAM, RIN3, EPHA6, NTN1, CAMK1D, FLRT2, PTPRO, ITGA9, RELN, CDH4, TNFR, VAV3, CNTN6, APP, CXADR, ALCAM, SLAMF1, PDGFD, FYN, EPHA7, CNTN5, DOCK4, EPHB1, FLT1, EXT1, EFNA5, SEMA6D, NTF3, FER, PLGRKT, PRKCQ, NRXN3, EPHB2, PRTG, DOCK2, NRP1, CDH13, SEMA3A, SEMA3E, ADAM10, GLI3, NTRK3, PLXNA2, RALA, PRKD1, SEMA3D, IL16, ROBO2, NEDD9, SEMA5A, DCC, CHN1, NRG1, SEMA3C                                                                                                                                                                                                                                                                                                                                                                                                                                                                                                                                                                                                                                                                             |

|            |                                                      |                         |                                                                                                                                                                                                                                                                                                                                                                                                                                                                                                                                                                                                                                                                                                                                                                                                                      |
|------------|------------------------------------------------------|-------------------------|----------------------------------------------------------------------------------------------------------------------------------------------------------------------------------------------------------------------------------------------------------------------------------------------------------------------------------------------------------------------------------------------------------------------------------------------------------------------------------------------------------------------------------------------------------------------------------------------------------------------------------------------------------------------------------------------------------------------------------------------------------------------------------------------------------------------|
| GO:0010976 | positive regulation of neuron projection development | 0.000015141595234434556 | KALRN, NEGR1, NRXN1, NTRK2, CNTN1, ROR1, RAP1A, ABL2, PAK3, IGF1R, NLGN1, CAMK1D, COBL, RELN, DISC1, FYN, TOX, TENM3, MARK2, RAPGEF2, ATP8A2, EPHB2, NRP1, ALK, NTRK3, ELAVL4, MAGI2, PRKD1, TNN, BCL11A                                                                                                                                                                                                                                                                                                                                                                                                                                                                                                                                                                                                             |
| GO:0008038 | neuron recognition                                   | 0.000016919127898235522 | NCAM2, CNTN4, ROBO1, DSCAM, CNTNAP2, CRTAC1, CNTN6, APP, NTM, EXT1, OPCML, EPHB2, NRP1, TNN, ROBO2, SEMA5A                                                                                                                                                                                                                                                                                                                                                                                                                                                                                                                                                                                                                                                                                                           |
| GO:0106027 | neuron projection organization                       | 0.000018836595321994576 | TANC2, KALRN, PLS1, GRIN2B, PAK3, IGF1R, NLGN1, INSR, RELN, APP, FYN, EPHB1, PPFIA2, UBE3A, EPHB2, PDLIM5, CTNND2, TANC1, DN M3, DOCK10, MTMR2, NEDD9                                                                                                                                                                                                                                                                                                                                                                                                                                                                                                                                                                                                                                                                |
| GO:0051345 | positive regulation of hydrolase activity            | 0.00002095448413539555  | SEMA4D, GPR55, JAK2, KALRN, GRIN2A, ADCYAP1R1, MYO9A, RASGEF1B, TIAM2, TBC1D22A, RAPGEF5, ARHGAP24, RAP1GDS1, BID, RAP1A, ABL2, MAP3K5, TBC1D5, ITGA1, GRIN2B, ROBO1, GARNL3, BCL2L13, SLC1A1, ARAP2, EGLN3, RASGRF2, DAPK1, APP, RASGRF1, RGL1, TIAM1, ASAP2, RALGPS1, ARHGAP42, ASAP1, FYN, NET1, ESR1, FLT1, RALGPS2, NTF3, MAPRE2, RAPGEF2, RABGAP1L, DLC1, SIPA1L2, EVI5, MTOR, RALGAP2, FBLN1, SGSM1, RGS7, SIPA1L3, NTRK3, RAPGEF4, TBC1D4, DOCK9, RASGRP1, MAGI2, DOCK10, PRKD1, RGS6, WDR41, NEDD9, RALGAP1, CHN1, TBC1D9, ST18                                                                                                                                                                                                                                                                             |
| GO:0072359 | circulator y system development                      | 0.000021592148119464874 | PRKCB, SLC8A1, COL18A1, DNAH11, IL6R, SORBS2, FGF12, LAMA1, NRXN1, WDPCP, CTDP1, ADAMTS6, RPS6KA2, SMOC2, CACNA1C, NTRK2, THSD7A, MEOX2, ENPEP, SOX6, CPE, CALD1, ARHGAP24, SLIT2, MYLK3, AKT3, ALPK2, ERBB4, MNAT1, RAP1A, RUNX1, ALDH1A2, EYA1, ANK2, SLIT3, ROBO1, OVOL2, SLC1A1, IGF1R, FLRT2, INSR, MYO18B, VAV3, PLCE1, ADAM12, CXADR, TENM4, RIN2, STARD13, NEBL, RARB, SLC39A12, ZFPM2, VSTM4, SVEP1, EGF, PDGFD, STK3, AP2B1, SGCZ, EPHB1, FHOD3, GREB1L, FLT1, EXT1, NXN, AKAP6, ATF2, LRP2, SGCD, RAPGEF2, IMMP2L, GTF2I, NRXN3, DLC1, EPHB2, PDLIM5, COL22A1, SETD2, FLVCR1, NRP1, CDH13, SEMA3E, CDH2, SERPINB7, HDAC9, PIK3R3, MTOR, FHL2, SPRED1, ADAM10, GLI3, NTRK3, FBN1, SGCG, BMPE R, HMGA2, PPARA, RORA, LOXL2, PRKD1, ETS1, TNN, RYR2, TGFA, TBX20, ROBO2, AKAP13, SEMA5A, NRG1, PRKCA, SEMA3C |
| GO:0010977 | negative regulation of neuron projection development | 0.000022746868505498895 | SEMA4D, CD38, PTPRG, SLIT2, KANK1, NTN1, NLGN1, MAP2, PTPRO, TNFR, SPOCK1, EPHA7, SEMA6D, UBE3A, EPHB2, NRP1, DAB1, SEMA3A, SEMA3E, FSTL4, DN M3, HDAC2, SEMA3D, FAT3, SEMA5A, BCL11A, DCC, SEMA3C                                                                                                                                                                                                                                                                                                                                                                                                                                                                                                                                                                                                                   |



|            |                                                    |                         |                                                                                                                                                                                                                                                                                                                                                                                                                                                                                                                                                                                                                                                                                                                                                                                                                                                                                                                                                                                                                                                                                                                                                                             |
|------------|----------------------------------------------------|-------------------------|-----------------------------------------------------------------------------------------------------------------------------------------------------------------------------------------------------------------------------------------------------------------------------------------------------------------------------------------------------------------------------------------------------------------------------------------------------------------------------------------------------------------------------------------------------------------------------------------------------------------------------------------------------------------------------------------------------------------------------------------------------------------------------------------------------------------------------------------------------------------------------------------------------------------------------------------------------------------------------------------------------------------------------------------------------------------------------------------------------------------------------------------------------------------------------|
| GO:0051966 | regulation of synaptic transmission, glutamatergic | 0.00002310910327113776  | GRIK2, CACNG2, GRIN2A, NRXN1, GRIK3, GRIN2B, GRIK1, DGKI, GRM5, NLGN1, RELN, TNFR, HCN1, DISC1, GRM1, GRM7, CDH2, SYT1, TSHZ3, CACNG3                                                                                                                                                                                                                                                                                                                                                                                                                                                                                                                                                                                                                                                                                                                                                                                                                                                                                                                                                                                                                                       |
| GO:0007611 | learning or memory                                 | 0.00002540901910041243  | DNAH11, RAG1, KCNK10, RCAN1, KALRN, BTBD9, GRIN2A, NRXN1, NTRK2, SHANK2, GABRA5, ITGA8, GRIN2B, BRINP1, DGKI, SLC1A1, GRM5, CNTNAP2, INSR, RELN, TNFR, APP, RASGRF1, MEIS2, FYN, GRIA1, S100B, AMFR, SORCS3, NTF3, CAMK4, ATXN1, NRXN3, UBE3A, EPHB2, TANC1, SPECC1, CSMD1, PLCB1, ELAVL4, ATP8A1, NEDD9                                                                                                                                                                                                                                                                                                                                                                                                                                                                                                                                                                                                                                                                                                                                                                                                                                                                    |
| GO:0030001 | metal ion transport                                | 0.000025518705619438668 | KCNMA1, SLC12A8, PRKCB, TRPM6, SLC8A1, KCNC1, BCL2, THADA, SLC13A4, KCNQ5, HEPHL1, SCN11A, KCNJ6, KCNK10, FGF12, CACNG2, GRIN2A, NIPA2, ADCYAP1R1, DPP6, ZDHHC17, KCNH1, CACNA1C, CNTN1, SLC24A4, CACNB2, TRPM3, SLC4A4, KCNE4, KCNS3, HECW1, NOS1, HTR2C, CACNA1E, SLC40A1, SLC9C1, ANK2, GRIN2B, NDFIP2, ITPR2, CACNA2D3, PRKCE, KCNH8, EFHB, SLC1A1, SLC12A1, KCNIP4, NOS1AP, NKAIN2, CATSPER2, ANK3, DPP10, CACNA2D1, HCN1, UTRN, TSPAN13, MICU1, NKAIN3, SLC39A12, EGF, FYN, KCND3, KCNN3, KCNAB1, PDE4D, ABCC9, TRPM7, TRPC5, AKAP6, TUSC3, LRP2, MICU2, SLC39A8, KCND2, SLC24A3, RYR3, FLVCR1, TRDN, RGS7, SLC24A2, SCARA5, ASIC2, TRPM1, CACNG3, PRKD1, RYR2, KCNH5, TMEM163, IL16, CDH23, SLC39A11, SLC5A1, STAC, SCN8A, KCNJ15                                                                                                                                                                                                                                                                                                                                                                                                                                    |
| GO:0051049 | regulation of transport                            | 0.00002652150915708233  | KCNMA1, PRKCB, SLC8A1, KCNC1, SIAH3, CD38, BCL2, THADA, UNC13B, KCNQ5, SCN11A, KCNJ6, KCNK10, APBA2, JAK2, TM9SF4, BICD1, ABCG8, KALRN, FGF12, CACNG2, BTBD9, GRIN2A, NRXN1, IL1RAPL1, ADCYAP1R1, DPP6, KCNH1, CACNA1C, OCLN, CNTN1, TTC39B, CACNB2, NUMB, STXB4, CHRM3, ABCA5, KCNE4, KCNS3, ABCA13, HECW1, RAP1GDS1, RAP1A, MYOM1, ABL2, NOS1, ABCG1, HTR2C, CACNA1E, TBC1D5, PIK3C3, ANK2, PLA2G4A, SLC1A2, GRIN2B, NDFIP2, CACNA2D3, PRKCE, KCNH8, DGKI, RIN3, EFHB, SLC1A1, GRM5, NLGN1, SHISA9, CORIN, MAP2, KCNIP4, CFTR, CAMK1D, NOS1AP, NKAIN2, INSR, CATSPER2, ANK3, CNIH3, RELN, RASGRF2, DPP10, DAPK1, CLIC6, APP, CACNA2D1, HCN1, UTRN, TSPAN13, RASGRF1, USP7, SCP2, SLAMF1, NKAIN3, EGF, FYN, KCND3, KCNAB1, PDE4D, RIMS1, FRMD4A, MCTP2, ABCC9, GSG1L, EFNA5, ATP9A, AKAP6, C2, NTF3, FER, GRM7, NRXN3, KCND2, ATP8A2, EPHB2, MCTP1, SETD2, PACSIN2, DOCK2, NUP214, NRP1, CDH13, TRDN, CDH2, MAP2K6, CADPS, NEU3, RGS7, CD2AP, GLI3, RAB31, RAPGEF4, MX2, NSUN2, TBC1D4, DNM3, SYT1, PPARA, SHISA6, STXB6, MAGI2, ASIC2, RALA, CACNG3, PRKD1, ATP8A1, BCL2L1, RYR2, MTMR2, KCNH5, IL16, WDR41, MYRIP, ENPP1, RIMS2, STAC, SCN8A, RAB27A, KCNJ15, NRG1, PCNT |
| GO:0001764 | neuron migration                                   | 0.000027188357300846656 | FBXO31, ASTN2, NTRK2, NRG3, UNC5D, ASTN1, NTN1, FLRT2, RELN, SPOCK1, PHACTR1, DISC1, FYN, MARK2, NTNG1, RAPGEF2, KIRREL3, AUTS2, SDCCAG8, NRP1, DAB1, SEMA3A, SEMA3E, DCLK1, NTRK3, PRKG1, TNN, TBX20, FAT3, DCC, CTNNA2, NRG1                                                                                                                                                                                                                                                                                                                                                                                                                                                                                                                                                                                                                                                                                                                                                                                                                                                                                                                                              |
| GO:0050767 | regulation of neurogenesis                         | 0.000027772277335050667 | SEMA4D, FBXO31, KALRN, IL1RAPL1, CTNNA1, NTRK2, TIAM2, NUMB, SLIT2, MACF1, ROBO1, PAK3, BRINP1, CHODL, DSCAM, GRM5, NTN1, MAP2, CUX1, RELN, CDH4, TNFR, TENM4, TIAM1, DISC1, EPHA7, EFNA5, TRPC5, LRP2, SEMA6D, RAPGEF2, PRKCH, EPHB2, PRTG, NRP1, DAB1, SEMA3A, SEMA3E, FSTL4, MTOR, GLI3, NTRK3, PLXNA2, PTPRD, HDAC2, SEMA3D, ROBO2, SEMA5A, BCL11A, DCC, SEMA3C                                                                                                                                                                                                                                                                                                                                                                                                                                                                                                                                                                                                                                                                                                                                                                                                         |
| GO:0006812 | cation transport                                   | 0.00003659183109543805  | KCNMA1, SLC12A8, PRKCB, TRPM6, SLC8A1, KCNC1, BCL2, THADA, SLC13A4, KCNQ5, HEPHL1, SCN11A, KCNJ6, KCNK10, FGF12, CACNG2, SLC44A5, GRIN2A, NRXN1, NIPA2, ADCYAP1R1, DPP6, ZDHHC17, KCNH1, CACNA1C, CNTN1, SLC24A4, CACNB2, TRPM3, SLC4A4, KCNE4, KCN                                                                                                                                                                                                                                                                                                                                                                                                                                                                                                                                                                                                                                                                                                                                                                                                                                                                                                                         |

|            |                                                |                         |                                                                                                                                                                                                                                                                                                                                                                                                                                                                                                                                                                                                                                                                                                                                                                                                                                                                                                                    |
|------------|------------------------------------------------|-------------------------|--------------------------------------------------------------------------------------------------------------------------------------------------------------------------------------------------------------------------------------------------------------------------------------------------------------------------------------------------------------------------------------------------------------------------------------------------------------------------------------------------------------------------------------------------------------------------------------------------------------------------------------------------------------------------------------------------------------------------------------------------------------------------------------------------------------------------------------------------------------------------------------------------------------------|
|            |                                                |                         | S3, HECW1, NOS1, HTR2C, CACNA1E, SLC40A1, SLC9C1, P2RX6, ANK2, SLC1A2, GRIN2B, NDFIP2, ITPR2, CACNA2D3, PRKCE, KCNH8, EFHB, SLC1A1, SLC12A1, NLGN1, SHISA9, KCNIP4, NOS1AP, NKAIN2, CATSPER2, ANK3, CNIH3, RELN, RASGRF2, DPP10, DAPK1, APP, CACNA2D1, HCN1, CHRM5, UTRN, TSPAN13, RASGRF1, MICU1, NKAIN3, SLC39A12, PIEZO2, EGF, FYN, KCND3, ANO10, KCNN3, KCNAB1, PDE4D, ATP6V1E1, ABCC9, GSG1L, TRPM7, TRPC5, AKAP6, TUSC3, LRP2, MICU2, SLC39A8, KCND2, SLC24A3, EPHB2, RYR3, FLVCR1, TRDN, ATP13A3, RGS7, SLC44A1, SLC24A2, SYT1, SHISA6, SCARA5, ASIC2, TRPM1, CACNG3, PRKD1, ATP8A1, RYR2, KCNH5, TMEM163, IL16, CDH23, SLC39A11, SLC5A1, STAC, SCN8A, KCNJ15                                                                                                                                                                                                                                               |
| GO:0016049 | cell growth                                    | 0.000036890012666203    | SEMA4D, TEAD1, CD38, BCL2, SORBS2, EPB41L3, CTDP1, SMARCA4, NRG3, MTPN, SLIT2, CSNK2A1, MACF1, RERG, SLIT3, ARHGEF11, DSCAM, NTN1, MAP2, COBL, CDH4, TNR, APP, FBLN5, SPOCK1, PLCE1, ALCAM, DISC1, EPHA7, NET1, RIMS1, EXT1, EFNA5, TRPC5, AKAP6, SEMA6D, TMEM108, PRKCQ, INO80, AUTS2, PDLIM5, NRP1, SEMA3A, SEMA3E, DCLK1, FSTL4, MTOR, ADAM10, PAPP2, SYT1, PPARA, TNN, SEMA3D, VCL, AKAP13, ENPP1, RIMS2, SEMA5A, BCL11A, DCC, NRG1, SEMA3C                                                                                                                                                                                                                                                                                                                                                                                                                                                                    |
| GO:0060560 | developmental growth involved in morphogenesis | 0.000037022817085677796 | SEMA4D, SLIT2, MACF1, SLIT3, DSCAM, NTN1, MAP2, COBL, CDH4, TNR, APP, ALCAM, DISC1, FMN1, EPHA7, ESR1, RIMS1, EXT1, EFNA5, TRPC5, SEMA6D, TMEM108, AUTS2, NRP1, SEMA3A, SEMA3E, DCLK1, FSTL4, SYT1, MAGI2, TNN, SEMA3D, VCL, RIMS2, SEMA5A, BCL11A, DCC, SEMA3C                                                                                                                                                                                                                                                                                                                                                                                                                                                                                                                                                                                                                                                    |
| GO:0003012 | muscle system process                          | 0.000038110048642730244 | KCNMA1, APBB2, SLC8A1, CD38, SORBS2, FGF12, CTDP1, CACNA1C, CACNB2, MTPN, CHRM3, CALD1, DTNA, KCNE4, RAP1GDS1, MYOM1, NOS1, P2RX6, ANK2, SMPX, ARHGEF11, BBS2, MYOM2, NOS1AP, FBXO32, PLCE1, CACNA2D1, UTRN, MYH13, MLIP, ARHGAP42, KCND3, PDE4D, DOCK4, ABCC9, HDAC4, AKAP6, SGCD, SSPN, ATP8A2, SNTB1, PDLIM5, TRDN, ASB3, MAP2K6, MTOR, CTNNA3, PPP1R12B, PPARA, PRKG1, HDAC2, RYR2, TBX20, AKAP13, STAC, PRKCA                                                                                                                                                                                                                                                                                                                                                                                                                                                                                                 |
| GO:0048167 | regulation of synaptic plasticity              | 0.00003885414032265373  | CD38, GRIK2, IGSF11, GRIN2A, NTRK2, SHANK2, CNTN4, GRIN2B, DGKI, SLC1A1, GRM5, SHISA9, RELN, RASGRF2, TNR, APP, RASGRF1, ZEF1, SORCS2, GRIA1, S100B, ERC2, RIMS1, SORCS3, GRID2, RAPGEF2, NSG1, EPHB2, ERC1, MCTP1, SLC24A2, SHISA6, TSHZ3, UNC13C, RIMS2                                                                                                                                                                                                                                                                                                                                                                                                                                                                                                                                                                                                                                                          |
| GO:0071495 | cellular response to endogenous stimulus       | 0.000039559490543461013 | CD44, PRKCB, SLC8A1, THRB, SNX25, JAK2, FGF12, NRXN1, ARID1B, SMOC2, PNPLA3, CTNNA1, NTRK2, NLK, SMARCA4, STXBPA, SOX6, NREP, CHRM3, SPRED2, SLIT2, GLP2R, RAP1GDS1, ERBB4, KANK1, RAP1A, PTPRE, DUSP22, EXT2, ACACA, HTR2C, ITGA8, ESRRG, PTGFR, SLC1A2, SLIT3, OVOL2, ITPR2, LEMD3, GABPA, PRKCE, PSG9, PRKAA2, BBS2, SOX5, KDM4C, SLC1A1, GRM5, NR5A2, IGF1R, CFTR, FLRT2, INSR, FBXO32, APP, PAK1, GNAL, CACNA2D1, HCN1, CHRM5, GHR, PRDM16, KL, LTBP1, RARB, PDGFR, FYN, NSG2, SPIDR, ESR1, PDE4D, GNG2, PDE3A, POR, WWOX, FUT8, EXT1, EFNA5, HDAC4, AKAP6, ATF2, ZNF423, LRP2, NTF3, FER, TMEM108, GABRB3, RAPGEF2, PRKCQ, GABRG2, CPS1, NSG1, UBE3A, IDE, APC, EPHB2, RYR3, RGM, ALK, LDLRAD4, KIF16B, HDAC9, PIK3R3, MTOR, GABRB1, BLM, SPRED1, TRERF1, NTRK3, RXFP1, FBN1, RAB31, BMPER, DEFA3, PTPRK, TBC1D4, PPARA, PLCB1, ELAVL4, MAGI2, BCL2L1, HDAC2, RYR2, PRLR, TBX20, PTPRA, ROBO2, ENPP1, BCL11A |
| GO:0043269 | regulation of ion                              | 0.00004283089119544846  | KCNMA1, SLC8A1, KCNC1, BCL2, THADA, KCNQ5, SCN11A, KCNJ6, KCN K10, FGF12, CACNG2, GRIN2A, NRXN1, ADCYAP1R1, DPP6, KCNH1, CACNA1C, CNTN1, CACNB2, CHRM3, KCNE4, KCNS3, HECW1, NOS1, CACNA1E, ANK2, PLA2G4A, GRIN2B, CACNA2D3, PRKCE, KCNH8, EFHB, GRM5, NLGN1, SHISA9, KCNIP4, CFTR, NOS1AP, NKAIN2, CATSPER2, ANK3                                                                                                                                                                                                                                                                                                                                                                                                                                                                                                                                                                                                 |

|                |                                                        |                            |                                                                                                                                                                                                                                                                                                                                                                                                                                                                                                                                                                                                                                                                                                                                                                                                                                                                                                                                                                                                                                                                                                 |
|----------------|--------------------------------------------------------|----------------------------|-------------------------------------------------------------------------------------------------------------------------------------------------------------------------------------------------------------------------------------------------------------------------------------------------------------------------------------------------------------------------------------------------------------------------------------------------------------------------------------------------------------------------------------------------------------------------------------------------------------------------------------------------------------------------------------------------------------------------------------------------------------------------------------------------------------------------------------------------------------------------------------------------------------------------------------------------------------------------------------------------------------------------------------------------------------------------------------------------|
|                | trans<br>port                                          |                            | , CNIH3, RELN, RASGRF2, DPP10, DAPK1, CLIC6, APP, CACNA2D1, HC<br>N1, UTRN, TSPAN13, RASGRF1, NKAIN3, EGF, FYN, KCND3, KCNAB1, P<br>DE4D, ABCC9, GSG1L, AKAP6, GRM7, KCND2, EPHB2, TRDN, MAP2K6, R<br>GS7, SYT1, SHISA6, ASIC2, CACNG3, PRKD1, RYR2, KCNH5, IL16, ST<br>AC, SCN8A, KCNJ15                                                                                                                                                                                                                                                                                                                                                                                                                                                                                                                                                                                                                                                                                                                                                                                                       |
| GO:00<br>09719 | respo<br>nse<br>to<br>endog<br>enous<br>stimu<br>lus   | 0.000064256<br>94000270094 | CD44, PRKCB, A2M, SLC8A1, KCNC1, CD38, BCL2, THRB, SNX25, JAK2<br>, FGF12, NRXN1, ARID1B, SMOC2, PNPLA3, CTNNA1, NTRK2, NLK, SMA<br>RCA4, SLC24A4, STXBP4, SOX6, NREP, CHRM3, SPRED2, SLIT2, GLP2<br>R, RAP1GDS1, ERBB4, KANK1, RAP1A, PTPRE, DUSP22, EXT2, NOS1, A<br>CACA, RERG, HTR2C, ITGA8, ESRRG, PTGFR, SLC1A2, SLIT3, OVOL2,<br>ITPR2, LEMD3, GABPA, PRKCE, PSG9, PRKAA2, BBS2, SOX5, KDM4C, S<br>LC1A1, GRM5, NR5A2, IGF1R, CFTR, FLRT2, INSR, FBXO32, APP, PAK<br>1, GNAL, CACNA2D1, HCN1, CHRM5, GHR, PRDM16, KL, LTBP1, RARB, P<br>DGFD, FYN, NSG2, SPIDR, ESR1, PDE4D, GNG2, PDE3A, POR, WWOX, FU<br>T8, EXT1, EFNA5, HDAC4, AKAP6, ACSBG1, ATF2, ZNF423, LRP2, C2,<br>NTF3, FER, TMEM108, GABRB3, RAPGEF2, PRKCQ, GABRG2, CPS1, NSG<br>1, UBE3A, IDE, TPH2, APC, TFF1, EPHB2, RYR3, RGMB, CDH13, ALK, L<br>DLRAD4, KIF16B, PAPPA, HDAC9, PIK3R3, MTOR, GABRB1, BLM, FHL2<br>, SPRED1, TRERF1, GLI3, NTRK3, RXFP1, FBN1, RAB31, BMPER, DEFA<br>3, PTPRK, TBC1D4, PPARA, PLCB1, ELAVL4, MAGI2, BCL2L1, HDAC2,<br>RYR2, PRLR, TBX20, PTPRA, ROBO2, ENPP1, BCL11A, VPS13C, BCKDH<br>B |
| GO:00<br>97061 | dendr<br>itic<br>spine<br>organ<br>izati<br>on         | 0.000075212<br>35173048459 | TANC2, KALRN, GRIN2B, PAK3, IGF1R, NLGN1, INSR, RELN, FYN, EPH<br>B1, PPFIA2, UBE3A, EPHB2, PDLIM5, CTNND2, TANC1, DNMT3, DOCK10<br>, MTMR2, NEDD9                                                                                                                                                                                                                                                                                                                                                                                                                                                                                                                                                                                                                                                                                                                                                                                                                                                                                                                                              |
| GO:00<br>40013 | negat<br>ive<br>regul<br>ation<br>of<br>locom<br>otion | 0.000087082<br>2631598776  | PTPRR, SEMA4D, BCL2, CTNNA1, SRGAP2B, MEOX2, NRG3, PTPRG, DLG<br>5, SLIT2, KANK1, DUSP22, SPOCK3, ROBO1, RIN3, GRM5, PTPRO, MIT<br>F, FRMD5, STARD13, SEMA6D, NAV3, DLC1, MCTP1, NRP1, DACH1, LDL<br>RAD4, SEMA3A, SEMA3E, FBLN1, SPRED1, SCAI, PTPRT, PTPRK, PLCB<br>1, PRKG1, MAGI2, HDAC2, TNN, SEMA3D, VCL, ROBO2, SRGAP3, NEDD9<br>, SEMA5A, NRG1, SEMA3C                                                                                                                                                                                                                                                                                                                                                                                                                                                                                                                                                                                                                                                                                                                                  |
| GO:00<br>18193 | pepti<br>dyl-<br>amino<br>acid<br>modif<br>icati<br>on | 0.000091070<br>84370003272 | CD44, SEMA4D, RPS6KA5, PRKCB, BCL2, SAMS1, CDC42BPA, KDM4B,<br>IL6R, BRD4, ZDHHC11B, TLK1, JAK2, MAST4, NRXN1, AGBL1, RPS6KA<br>2, ZDHHC17, NTRK2, NLK, CNTN1, STK32B, SPRED2, ROR1, CSNK2A1,<br>AKT3, KMT2C, ERBB4, STT3A, ATRX, DUSP22, ABL2, NOS1, MAPK9, PE<br>AK1, EYA1, MORC3, SPOCK3, SUPT3H, EGFLAM, DPH6, TNKS, MLLT3, P<br>RKCE, PRKAA2, KDM4C, SLC1A1, GRM5, EPHA6, IGF1R, CAMK1D, NOS1<br>AP, ZDHHC14, INSR, PHF20L1, EGLN3, DOCK3, RELN, STK38, VRK1, A<br>PP, PAK1, NSMCE2, GHR, TTLL11, EGF, PDGFD, FYN, PRMT8, EPHA7, C<br>NOT7, PDE4D, POR, FUT8, EPHB1, EFEMP1, FLT1, EFNA5, HDAC4, TRP<br>C5, SH3BP5, MARK2, ATF2, TUSC3, NTF3, FER, CAMK4, PRKCQ, PRKCH<br>, TTLL5, AUTS2, EPHB2, SETD2, NRP1, ALK, MGAT5, DCLK1, HDAC9, M<br>AP2K6, MTOR, STK38L, NCAPG2, STK32A, SPRED1, KANS1, DPY19L2<br>, NTRK3, CHKA, LOXL2, ABI1, GALNTL6, PRKD1, HDAC2, TGFA, PRLR,<br>ATAT1, NEDD9, BCL11A, PARD3, NRG1, PRKCA, DPY19L1, TOP1                                                                                                                                                      |
| GO:00<br>16043 | cellu<br>lar<br>compo<br>nent<br>organ<br>izati<br>on  | 0.000100208<br>80239026214 | CD44, KCNMA1, C10ORF90, APBB2, SCAF8, PARN, SEMA4D, SLC12A8,<br>ZFYVE1, TEAD1, NFIA, RPS6KA5, TAOK3, PRKCB, TRPM6, KCNC1, DNA<br>JC15, SIAH3, CD38, FBXO31, TRAPPC9, BCL2, MMP16, CHFR, COL18A<br>1, CDC42BPA, RAG1, SAMM50, CDC42EP3, UNC13B, NCAM1, KDM4B, CD<br>H8, ATP10A, SORBS2, SKAP2, BRD4, GRIPI1, TLK1, TANC2, KIF4A, CS<br>MD3, NTN4, JAK2, TM9SF4, BICD1, ABCG8, KALRN, NEGR1, CACNG2, B<br>TBD9, EPB41L3, LAMA1, PARVB, CDH11, CDS2, MAST4, NRXN1, ARID1<br>B, IL1RAPL1, WPCP, MAGI1, LAMA3, ADAMTS17, CTDP1, ADAMTS6, P<br>RELID2, GOLGA8J, RPS6KA2, SMOC2, ZDHHC17, CCSER2, BMF, EXOC4<br>, PNPLA3, ANO4, BBS9, CTNNA1, MYO9A, NTRK2, OCLN, THSD7A, AFAP<br>1, NCAM2, TIAM2, IQCJ-<br>SCHIP1, LRRC49, SMARCA4, CNTN1, NRG3, PTPRG, ELMO1, CABIN1, S<br>YNE1, GAS2, CACNB2, NUMB, MED15, MTPN, ESYT2, MECOM, SYBU, PDE<br>4DIP, TRPM3, DNAH8, SHANK2, PTGFRN, KCTD8, CHCHD6, UNC5D, NRE                                                                                                                                                                                           |

|            |                                |                        |                                                                                                                                                                                                                                                                                                                                                                                                                                                                                                                                                                                                                                                                                                                                                                                                                                                                                                                                                                                                                                                                                                                                                                                                                                                                                                                                                                                                                                                                                                                                                                                                                                                                                                                                                                                                                                                                                                                                                                                                                                                                                                                                                                                                                                                                                                                                                                                                                                                                                                                                                                                                                                                                                                                                                                                                                                                                                                                                                                                                                                                                                                                                                                                                                                                                                                                                                                                   |
|------------|--------------------------------|------------------------|-----------------------------------------------------------------------------------------------------------------------------------------------------------------------------------------------------------------------------------------------------------------------------------------------------------------------------------------------------------------------------------------------------------------------------------------------------------------------------------------------------------------------------------------------------------------------------------------------------------------------------------------------------------------------------------------------------------------------------------------------------------------------------------------------------------------------------------------------------------------------------------------------------------------------------------------------------------------------------------------------------------------------------------------------------------------------------------------------------------------------------------------------------------------------------------------------------------------------------------------------------------------------------------------------------------------------------------------------------------------------------------------------------------------------------------------------------------------------------------------------------------------------------------------------------------------------------------------------------------------------------------------------------------------------------------------------------------------------------------------------------------------------------------------------------------------------------------------------------------------------------------------------------------------------------------------------------------------------------------------------------------------------------------------------------------------------------------------------------------------------------------------------------------------------------------------------------------------------------------------------------------------------------------------------------------------------------------------------------------------------------------------------------------------------------------------------------------------------------------------------------------------------------------------------------------------------------------------------------------------------------------------------------------------------------------------------------------------------------------------------------------------------------------------------------------------------------------------------------------------------------------------------------------------------------------------------------------------------------------------------------------------------------------------------------------------------------------------------------------------------------------------------------------------------------------------------------------------------------------------------------------------------------------------------------------------------------------------------------------------------------------|
|            |                                |                        | <p>P, DLG5, CFDP1, PGM5, SMARCA1, CALD1, ARHGAP24, IGHV1OR15-9, SLIT2, PITPNC1, MYLK3, ABCA5, ROR1, ADAMTSL1, CSNK2A1, AKT3, CRB1, KMT2C, KCNS3, ABCA13, HECW1, RAP1GDS1, ERBB4, KANK1, GPHN, ATRX, DMRT1, BID, MACF1, MNAT1, RAP1A, TRIO, RAD51B, TRMT61B, DUSP22, ABL2, ACACA, ABCG1, SPAG16, EML1, RERG, CCDC141, CNTN4, TBC1D5, PIK3C3, SNAP25-AS1, CHD6, HMCN1, FGD4, GOLGA6D, ITGA1, HIRA, CORO2B, ITGA8, RUXN1, ALDH1A2, MAPK9, IGHV1OR21-1, FAM171A1, CDH17, PEAK1, EYA1, ADAMTSL19, CDH18, HSF2BP, FRMD6, PLS1, ANK2, SLC1A2, SLIT3, GRIN2B, ZNF518A, ROBO1, ANKRD30BL, EGFLAM, PAK3, DGKB, TNKS, GABRA2, MDM1, FCHSD2, MLLT3, TRAPPC10, LEMD3, CHODL, EHBP1, PSTPIP2, ITGB3BP, TMEM67, PRKCE, ARHGEF11, PRKAA2, BBS2, IL1RAPL2, CHCHD3, MYOM2, NUBPL, DSCAM, RIN3, ANKFN1, TRAPPC8, KDM4C, SDK1, SLC1A1, SLC12A1, GRM5, EPHA6, NTN1, IGF1R, SPTB, WDR72, SNX30, NLGN1, DNAH9, SHROOM3, CNTNAP2, MAP2, CAMK1D, FLRT2, NOS1AP, PTPRO, MATN2, INSR, COBL, MDN1, CLEC16A, MTRF1, CRTAC1, CUX1, ANK3, CDH12, MORC2, THSD4, TBCD, GPC6, RELN, ADAMTSL5, ADAMTSL3, CDH4, TNR, CELF4, VAV3, VRK1, CNTN6, APP, FBLN5, CCDC88A, KCTD1, SPOCK1, HPSE2, PLCE1, TACC2, PAK1, ATP9B, MITF, ADCK1, HCN1, TOP3A, NSMCE2, FRY, CXADR, EPS8, LRFN5, UTRN, TENM4, CECR2, PRR16, RASGRF1, PRDM16, FRMD5, USP7, STARD13, SCP2, LRRC4C, ALCAM, PPP1R9A, PDZRN3, ADAMTSL16, MICU1, SLAMF1, INO80D, CLSTN2, TLL11, NEBL, TCF4, FRYL, TIAM1, PHACTR1, SLC39A12, DISC1, FMN1, CHAF1A, SVEP1, VTI1A, ASAP1, FRMPD4, COL23A1, EGF, FYN, KCND3, PRMT8, IFT43, LRBA, EPHA7, MAP7, NSG2, TRABD2B, SPIDR, NAV2, STK3, CNOT7, COL19A1, MSR1, PSIP1, S100B, NET1, TOX, PCDH15, ESR1, ARHGAP12, SGCZ, CNTN5, ERC2, PRKACB, PDE3A, RIMS1, L3MBTL4, CNKSR2, EPHB1, CTTNBP2, FHOD3, ARMC2, IGSF21, MIPEP, SNAP29, GSG1L, HRC1, DOCK1, DIAPH3, TRPM7, EXT1, EFNA5, CDC14B, TLN2, C14ORF39, HDAC4, STK36, KLHL1, TRPC5, ATP9A, PPFIA2, AKAP6, VPS37A, TENM3, LINGO2, MARK2, ATF2, PHACTR2, GRID2, ZNF423, LRP2, SEMA6D, NTF3, FER, TTC29, CELF2, NTNG1, MAPRE2, ARFGAP3, RAD51AP1, TMEM108, GABRB3, GRM7, SLC39A8, RAPGEF2, NAV3, IMMP2L, PRKQ, KIRREL3, GABRG2, NUDCD3, PRKCH, NRXN3, RHPN2, KRT25, DLC1, NSG1, KCND2, ATP8A2, UBE3A, MPRIP, APC, TLL5, INO80, AUTS2, EPHB2, SCAF4, ERC1, PDLIM5, AGO3, C9, MCTP1, RNU1-51P, RYR3, PRTG, NBN, ADAMTSL18, CTNND2, FRMD3, COL22A1, SETD2, PACSIN2, PKP1, DOCK2, SDCCAG8, NRP1, CDH13, RFC3, PHACTR3, RGRIP1, TRDN, DAB1, RFTN1, ALK, EXOC6B, LDLRAD4, SEMA3A, SEMA3E, DCLK1, CDH2, TENM2, TANC1, VPS41, SYCP1, HDAC9, FSTL4, ARHGAP28, MTOR, STK38L, FBLN1, BLM, SH3KBP1, NEU3, NCAPG2, CD2AP, TTC39C, CLVS2, SIPA1L3, ADAM10, TSPAN33, KANS1L, LRFN2, FLNB, PAPP2, SPECC1, GLI3, NTRK3, RXFP1, HYDIN, CHKA, RAB31, CTNNA3, VPS13D, ABHD17C, ANKRD31, ATF7IP, HMGA2, THSD7B, PTPRK, TBC1D4, DNM3, SYT1, APIP, SYNDIG1, DPF3, NPHP4, SACS, PPARA, PLXNA2, PTPRD, SHISA6, SCARA5, PLCB1, LOXL2, BPTF, PRKG1, ELAVL4, CDH9, STXBP6, MAGI2, STX12, ABI1, ASIC2, RALA, DOCK10, GNPATB, TRPM1, PRKD1, ATP8A1, BCL2L1, MICAL3, HDAC2, ETS1, TNN, SEMA3D, BANP, TGFA, PRLR, TBX20, PTPRA, FAT3, MTMR2, VCL, DEPTOR, ATAT1, ROBO2, IFT81, ZMYND11, CDH23, AKAP13, NEDD9, ENPP1, UNC13C, RIMS2, RAB27A, EYA4, L3MBTL3, CLIP1, SEMA5A, BCL11A, DCC, CTNNA2, CEP44, PVT1, PARD3B, CHN1, ETV6, VPS13C, PARD3, NRG1, CAST, ATP10B, PRKCA, FMN2, SEMA3C, PCNT, OSBPL5, TOP1</p> |
| GO:0060284 | regulation of cell development | 0.00011205285157845214 | <p>SEMA4D, FBXO31, BCL2, KALRN, IL1RAPL1, CTNNA1, NTRK2, TIAM2, NUMB, SLIT2, KANK1, MACF1, ROBO1, PAK3, BRINP1, CHODL, DSCAM, GRM5, NTN1, MAP2, CUX1, RELN, CDH4, TNR, TENM4, TIAM1, DISC1, EPHA7, PDE3A, DOCK1, EFNA5, HDAC4, TRPC5, LRP2, SEMA6D, RAPGEF2, PRKCH, EPHB2, PRTG, NRP1, DAB1, SEMA3A, SEMA3E, HDAC9, FSTL4, MTOR, FBLN1, GLI3, NTRK3, FBN1, PLXNA2, PTPRD, PLCB1, HDAC2, SEMA3D, VCL, ROBO2, NEDD9, SEMA5A, BCL11A, DCC, SEMA3C</p>                                                                                                                                                                                                                                                                                                                                                                                                                                                                                                                                                                                                                                                                                                                                                                                                                                                                                                                                                                                                                                                                                                                                                                                                                                                                                                                                                                                                                                                                                                                                                                                                                                                                                                                                                                                                                                                                                                                                                                                                                                                                                                                                                                                                                                                                                                                                                                                                                                                                                                                                                                                                                                                                                                                                                                                                                                                                                                                                |
| GO:0031589 | cell-substrate                 | 0.0001256670588895394  | <p>CD44, BCL2, NTN4, JAK2, USH2A, PARVB, WPCP, ITGBL1, ATRNL1, KANK1, MACF1, DUSP22, ITGA1, CORO2B, ITGA8, PEAK1, EGFLAM, PRKCE, EDIL3, PTPRO, CD96, ITGA9, TBCD, FBLN5, SPOCK1, UTRN, RIN2, TIAM1, DISC1, FMN1, EPHB1, AJAP1, DOCK1, TRPM7, EFNA5, PPFIA</p>                                                                                                                                                                                                                                                                                                                                                                                                                                                                                                                                                                                                                                                                                                                                                                                                                                                                                                                                                                                                                                                                                                                                                                                                                                                                                                                                                                                                                                                                                                                                                                                                                                                                                                                                                                                                                                                                                                                                                                                                                                                                                                                                                                                                                                                                                                                                                                                                                                                                                                                                                                                                                                                                                                                                                                                                                                                                                                                                                                                                                                                                                                                     |

|            |                                                    |                        |                                                                                                                                                                                                                                                                                                                                                                                                                                                                                                                                                                                                                                                                                                                                                                                                                                                                                                                                 |
|------------|----------------------------------------------------|------------------------|---------------------------------------------------------------------------------------------------------------------------------------------------------------------------------------------------------------------------------------------------------------------------------------------------------------------------------------------------------------------------------------------------------------------------------------------------------------------------------------------------------------------------------------------------------------------------------------------------------------------------------------------------------------------------------------------------------------------------------------------------------------------------------------------------------------------------------------------------------------------------------------------------------------------------------|
|            | adhesion                                           |                        | 2, FER, NTNG1, DLC1, NRP1, CDH13, SEMA3E, FBLN1, PTPRK, TNN, PTPRA, VCL, NEDD9, FREM1                                                                                                                                                                                                                                                                                                                                                                                                                                                                                                                                                                                                                                                                                                                                                                                                                                           |
| GO:0007167 | enzyme-linked receptor protein signaling pathway   | 0.00013517075938737616 | PTPRR, PRKCB, SNX25, JAK2, KALRN, FGF12, NRXN1, SMOC2, ZDHHC17, FAM83B, NTRK2, NLK, NRG3, PTPRG, BTBD11, STXBP4, NREP, DOK5, SPRED2, ROR1, ERBB4, KANK1, DMRT1, TRIO, PTPRE, DUSP22, ITGA1, ITGA8, ANKS1B, ROBO1, PAK3, OVOL2, LEMD3, PSG9, EPHA6, IGF1R, FLRT2, INSR, CCDC88A, PLCE1, PAK1, GHR, PRDM16, KL, LTBP1, TIAM1, SVEP1, EGF, PDGFR, FYN, EPHA7, FUT8, EPHB1, EFEMP1, FLT1, EXT1, EFNA5, ATF2, ZNF423, LRP2, NTF3, FER, TMEM108, RAPGEF2, PRKCQ, IDE, APC, EPHB2, RGM2, NRP1, CDH13, ALK, LDLRAD4, KIF16B, ARID5B, PIK3R3, FSTL4, NEU3, SPRED1, PTPRT, NTRK3, FBN1, BMPER, PTPRK, PPARA, PTPRD, PLCB1, MAGI2, ABI1, PRKD1, HDAC2, TGFA, PRLR, TBX20, PTPRA, NEDD9, ENPP1, CHN1, NRG1                                                                                                                                                                                                                                  |
| GO:0035235 | ionotropic glutamate receptor signaling pathway    | 0.00014293095967962463 | GRIK2, GRIN2A, GRID1, GRIK3, GRIK4, GRIN2B, GRIK1, APP, GRIA1, GRID2, GRIA4                                                                                                                                                                                                                                                                                                                                                                                                                                                                                                                                                                                                                                                                                                                                                                                                                                                     |
| GO:190806  | ligand-gated ion channel signaling pathway         | 0.00014293095967962463 | GRIK2, GRIN2A, GRID1, GRIK3, GRIK4, GRIN2B, GRIK1, APP, GRIA1, GRID2, GRIA4                                                                                                                                                                                                                                                                                                                                                                                                                                                                                                                                                                                                                                                                                                                                                                                                                                                     |
| GO:0007612 | learning                                           | 0.00014742089142736023 | RAG1, KALRN, GRIN2A, NRXN1, NTRK2, SHANK2, GABRA5, DGKI, SLC1A1, GRM5, CNTNAP2, INSR, RELN, TNFR, APP, MEIS2, FYN, SORCS3, ATXN1, NRXN3, UBE3A, EPHB2, TANC1, SPECC1, CSMD1, PLCB1, ELAVL4, ATP8A1                                                                                                                                                                                                                                                                                                                                                                                                                                                                                                                                                                                                                                                                                                                              |
| GO:2000026 | regulation of multicellular organismal development | 0.00015769532661605065 | SEMA4D, PRKCB, SLC8A1, GPR55, FBXO31, RAG1, KALRN, LAMA1, NRXN1, ARID1B, IL1RAPL1, WPCP, LAMA3, CTDP1, SMOC2, CTNNA1, NTRK2, TIAM2, SMARCA4, NUMB, SOX6, DLG5, SPRED2, SLIT2, ZNF675, AKT3, ERBB4, MACF1, RBM19, RUNX1, ZBTB16, ROBO1, PAK3, OVOL2, BIRN1, CHODL, GABPA, PSG9, SOX5, DSCAM, GRM5, NTN1, NLGN1, JAM2, MAP2, CFTR, FLRT2, INSR, CUX1, RELN, TRPS1, CDH4, TNFR, ADAM12, MITF, CXADR, TENM4, MEIS2, KL, INO80D, CLSTN2, RARB, TIAM1, SLC39A12, DISC1, ZFP2, EGF, EPHA7, TOX, POR, EPHB1, EFEMP1, AJAP1, FLT1, EFNA5, TRPC5, AKAP6, LINGO2, ATF2, GRID2, LRP2, SEMA6D, CAMK4, RAPGEF2, GTF2I, PRKCH, INO80, EPHB2, PRTG, NRP1, DAB1, SEMA3A, SEMA3E, FSTL4, MTOR, SPRED1, ADAM10, GLI3, NTRK3, FBN1, BMPER, HMG2, SYNDIG1, PPARA, PLXNA2, PTPRD, PLCB1, LIXL2, RASGRP1, NELL1, ASIC2, PRKD1, HDAC2, ETS1, TNN, SEMA3D, PRLR, TBX20, MTMR2, VCL, ROBO2, NEDD9, ENPP1, SEMA5A, BCL11A, DCC, PARD3, NRG1, PRKCA, SEMA3C |
| GO:0050772 | positive regulation of axonogenesis                | 0.00021036493493207332 | SEMA4D, NTRK2, TIAM2, SLIT2, MACF1, ROBO1, CHODL, DSCAM, NTN1, CDH4, TIAM1, DISC1, EFNA5, TRPC5, NRP1, PLXNA2, ROBO2, SEMA5A, BCL11A                                                                                                                                                                                                                                                                                                                                                                                                                                                                                                                                                                                                                                                                                                                                                                                            |

|            |                                                                  |                        |                                                                                                                                                                                                                                                                                                                                                                                                                                                                                                                                                                                                                                                                                                                                                                                                                                                                                                                                                                                                                                                                                                                                                                                                                                                                                                                                                                                                                           |
|------------|------------------------------------------------------------------|------------------------|---------------------------------------------------------------------------------------------------------------------------------------------------------------------------------------------------------------------------------------------------------------------------------------------------------------------------------------------------------------------------------------------------------------------------------------------------------------------------------------------------------------------------------------------------------------------------------------------------------------------------------------------------------------------------------------------------------------------------------------------------------------------------------------------------------------------------------------------------------------------------------------------------------------------------------------------------------------------------------------------------------------------------------------------------------------------------------------------------------------------------------------------------------------------------------------------------------------------------------------------------------------------------------------------------------------------------------------------------------------------------------------------------------------------------|
|            | genes                                                            |                        |                                                                                                                                                                                                                                                                                                                                                                                                                                                                                                                                                                                                                                                                                                                                                                                                                                                                                                                                                                                                                                                                                                                                                                                                                                                                                                                                                                                                                           |
| GO:0006793 | phosphorous metabolic process                                    | 0.00022911503643373605 | CD44,PTPRR,ERG,SEMA4D,RPS6KA5,TAOK3,PRKCB,TRPM6,SLC8A1,CD38,BCL2,CAMTA1,SAMSN1,RSRC1,CDC42BPA,SNX25,DPYD,MAPK10,IL6R,ZBTB20,BRD4,TLK1,RCAN1,JAK2,TPTE2,KALRN,SLC44A5,LAMA1,CDS2,MAST4,NRXN1,ADCYAP1R1,CTDP1,RPS6KA2,CKMT1B,PNPLA3,NTRK2,OCN,AK8,NLK,CNTN1,NRG3,PTPRG,PDE10A,STK32B,SPRED2,SLIT2,MYLK3,ROR1,SLC4A4,ZNF675,CSNK2A1,AKT3,PHKB,ALPK2,ERBB4,GPHN,MNAT1,TAF4B,RAP1A,TRIO,PTPRE,MYO3B,DUSP22,ABL2,MAP3K5,NOS1,ACACA,HTR2C,NEK4,SLCO3A1,PIK3C3,ITGA1,MAPK9,FAR2,PEAK1,EYA1,MORC3,AKAP10,PLA2G4A,ROBO1,PAK3,DGKB,TNKS,SGMS1,DGKK,PRKCE,PRKAA2,PTPRN2,MYO3A,DSCAM,DGKI,NME7,ACSM2A,SLC1A1,GRM5,EPHA6,LDB2,IGF1R,FAR1,CAMK1D,PTPRO,INSR,GMD5,DOCK3,RELN,STK38,ADCY9,DAPK1,VAV3,INPP5A,VRK1,ACSM2B,TTC7B,APP,CCDC88A,PLCE1,PAK1,ADCK1,CHRM5,GHR,RIPK4,SCP2,FAM126B,LIP1,OSBPL10,EGF,PDGFD,FYN,EPHA7,FHIT,STK3,CNOT7,PDE4D,PRKACB,PIGK,HUNK,FUT8,EPHB1,EFEMP1,PIGB,FAM126A,TRPM7,FLT1,EFNA5,CDC14B,HDAC4,STK36,TRPC5,SH3BP5,ACSBG1,MARK2,ATF2,NTF3,FER,SNRK,CAMK4,TPTE,RAPGEF2,PPA2,PRKCQ,CPS1,PRKCH,DLC1,PNPLA7,APC,MOC5,EPHB2,ERC1,MOB3B,NBN,NRP1,DAB1,ALK,LDLRAD4,MGAT5,DCLK1,MAGI3,CCNG2,ELOVL7,PIK3R3,MAP2K6,MTOR,STK38L,KSR1,FBLN1,BLM,SH3KBP1,NCAPG2,KYNU,STK32A,SLC44A1,SPRED1,ADAM10,PPP2R2C,MTMR10,PTPRT,NTRK3,CHKA,BMPER,HMGA2,PTPRK,DLG2,PPARA,PTPRD,RORA,PLCB1,PRKG1,RASGRP1,NLRC5,MAGI2,ABI1,GNPTAB,PRKD1,ADK,HDAC2,TGFA,PRLR,PTPRA,MTMR2,DEPTOR,AKAP13,NEDD9,ENPP1,PARD3,NRG1,PRKCA,CSF2RB,OSBPL5,TOPI1 |
| GO:0007169 | transmembrane receptor protein tyrosine kinase signaling pathway | 0.00023593386246146305 | PTPRR,PRKCB,JAK2,KALRN,FGF12,NRXN1,SMOC2,ZDHHC17,FAM83B,NTRK2,NRG3,PTPRG,STXBPA4,DOK5,ROR1,ERBB4,KANK1,PTPRE,ITGA1,ANKS1B,ROBO1,PAK3,EPHA6,IGF1R,FLRT2,INSR,CCDC88A,PLCE1,PAK1,GHR,KL,TIAM1,SVEP1,EGF,PDGFD,FYN,EPHA7,EPHB1,EFEMP1,FLT1,EXT1,EFNA5,NTF3,FER,TMEM108,RAPGEF2,PRKCQ,IDE,APC,EPHB2,NRP1,CDH13,ALK,KIF16B,ARID5B,PIK3R3,FSTL4,NEU3,PTPRT,NTRK3,PLCB1,ABI1,PRKD1,TGFA,PRLR,PTPRA,NEDD9,ENPP1,CHN1,NRG1                                                                                                                                                                                                                                                                                                                                                                                                                                                                                                                                                                                                                                                                                                                                                                                                                                                                                                                                                                                                         |
| GO:0045595 | regulation of cell differentiation                               | 0.00026722471036145823 | ZHX3,SEMA4D,GPR55,FBXO31,BCL2,RAG1,IL6R,JAK2,KALRN,USH2A,ZNF536,LAMA1,ZBTB7C,ARID1B,ILIRAPL1,CTDP1,CTNNA1,NTRK2,TIAM2,SMARCA4,PLEKHB2,NUMB,SOX6,NREP,SPRED2,SLIT2,MYLK3,ABCA5,ZNF675,KANK1,MACF1,RAP1A,TRIO,MAP3K5,ABCG1,HTR2C,CNTN4,TCF12,RUNX1,MAPK9,EYA1,ZBTB16,ROBO1,PAK3,OVOL2,BRINP1,CHODL,GABPA,GLIS1,PSG9,SOX5,DSCAM,KDM4C,GRM5,NTN1,NLGN1,MAP2,CUX1,RELN,TRPS1,CDH4,TNR,APP,MITF,TENM4,GHR,RIN2,RBFOX1,MEIS2,RARB,TCF4,TIAM1,PBX1,DISC1,ZFPM2,EPHA7,STK3,MSR1,TOX,PDE3A,POR,EPHB1,EFEMP1,AJAP1,DOCK1,EFNA5,HDAC4,TRPC5,FTO,AKAP6,LRP2,SEMA6D,NTF3,CAMK4,RAPGEF2,PRKCH,APC,EPHB2,PRTG,NRP1,DAB1,ALK,LDLRAD4,SEMA3A,SEMA3E,HDAC9,FSTL4,MTOR,RORB,FBLN1,SPRED1,GLI3,NTRK3,FBN1,NSUN2,DPF3,PPARA,PLXNA2,PTPRD,RORA,PLCB1,LOXL2,RASGRP1,NELL1,PRKD1,HDAC2,ETS1,TNN,SEMA3D,PRLR,TBX20,VCL,ATAT1,ROBO2,NEDD9,ENPP1,PCP4,SEMA5A,BCL11A,DCC,NRG1,PRKCA,SEMA3C                                                                                                                                                                                                                                                                                                                                                                                                                                                                                                                                                             |
| GO:0006796 | phosphatoc-                                                      | 0.0002704145769230013  | CD44,PTPRR,ERG,SEMA4D,RPS6KA5,TAOK3,PRKCB,TRPM6,SLC8A1,CD38,BCL2,CAMTA1,SAMSN1,RSRC1,CDC42BPA,SNX25,DPYD,MAPK10,IL6R,ZBTB20,BRD4,TLK1,RCAN1,JAK2,TPTE2,KALRN,SLC44A5,LAMA1,CDS2,MAST4,NRXN1,ADCYAP1R1,CTDP1,RPS6KA2,                                                                                                                                                                                                                                                                                                                                                                                                                                                                                                                                                                                                                                                                                                                                                                                                                                                                                                                                                                                                                                                                                                                                                                                                      |

|            |                                                        |                        |                                                                                                                                                                                                                                                                                                                                                                                                                                                                                                                                                                                                                                                                                                                                                                                                                                                                                                                                                                                                                                                                                                                                                                                                                                                                                                                                                                                                       |
|------------|--------------------------------------------------------|------------------------|-------------------------------------------------------------------------------------------------------------------------------------------------------------------------------------------------------------------------------------------------------------------------------------------------------------------------------------------------------------------------------------------------------------------------------------------------------------------------------------------------------------------------------------------------------------------------------------------------------------------------------------------------------------------------------------------------------------------------------------------------------------------------------------------------------------------------------------------------------------------------------------------------------------------------------------------------------------------------------------------------------------------------------------------------------------------------------------------------------------------------------------------------------------------------------------------------------------------------------------------------------------------------------------------------------------------------------------------------------------------------------------------------------|
|            | ining compo und metab olic proce ss                    |                        | CKMT1B, PNPLA3, NTRK2, OCLN, AK8, NLK, CNTN1, NRG3, PTPRG, PDE10A, STK32B, SPRED2, SLIT2, MYLK3, ROR1, SLC4A4, ZNF675, CSNK2A1, AKT3, PHKB, ALPK2, ERBB4, GPHN, MNAT1, TAF4B, RAP1A, TRIO, PTPRE, MYO3B, DUSP22, ABL2, MAP3K5, NOS1, ACACA, HTR2C, NEK4, SLCO3A1, PIK3C3, ITGA1, MAPK9, FAR2, PEAK1, EYA1, MORC3, AKA P10, PLA2G4A, ROBO1, PAK3, DGKB, TNKS, SGMS1, DGKK, PRKCE, PRKAA2, PTPRN2, MYO3A, DSCAM, DGKI, NME7, ACSM2A, SLC1A1, GRM5, EPHA6, LDB2, IGF1R, FAR1, CAMK1D, PTPRO, INSR, DOCK3, RELN, STK38, ADCY9, DAPK1, VAV3, INPP5A, VRK1, ACSM2B, TTC7B, APP, CCDC88A, PLCE1, PAK1, ADCK1, CHRM5, GHR, RIPK4, SCP2, FAM126B, LIP I, OSBPL10, EGF, PDGFD, FYN, EPHA7, FHIT, STK3, CNOT7, PDE4D, P RKACB, PIGK, HUNK, EPHB1, EFEMP1, PIGB, FAM126A, TRPM7, FLT1, EFNA5, CDC14B, HDAC4, STK36, TRPC5, SH3BP5, ACSBG1, MARK2, AT F2, NTF3, FER, SNRK, CAMK4, TPTE, RAPGEF2, PPA2, PRKCQ, CPS1, P RKCH, DLC1, PNPLA7, APC, MOCS2, EPHB2, ERC1, MOB3B, NBN, NRP1, DAB1, ALK, LDLRAD4, MGAT5, DCLK1, MAGI3, CCNG2, ELOVL7, PIK3R3, MAP2K6, MTOR, STK38L, KSR1, FBLN1, BLM, SH3KBP1, NCAPG2, KY NU, STK32A, SLC44A1, SPRED1, ADAM10, PPP2R2C, MTMR10, PTPRT, NTRK3, CHKA, BMPER, HMGA2, PTPRK, DLG2, PPARA, PTPRD, RORA, PL CB1, PRKG1, RASGRP1, NLRC5, MAGI2, ABI1, GNPTAB, PRKD1, ADK, H DAC2, TGFA, PRLR, PTPRA, MTMR2, DEPTOR, AKAP13, NEDD9, ENPP1, PARD3, NRG1, PRKCA, CSF2RB, OSBPL5, TOP1 |
| GO:0048638 | regul ation of devel opmen tal growt h                 | 0.00030244994244081207 | SEMA4D, BCL2, CTDP1, ERBB4, MACF1, RUNX1, PLS1, BBS2, DSCAM, N TN1, MAP2, INSR, CDH4, TNR, APP, CXADR, GHR, DISC1, ZFPM2, EPHA7, STK3, RIMS1, EFNA5, TRPC5, FTO, AKAP6, SEMA6D, ATP8A2, FLVC R1, NRP1, SEMA3A, SEMA3E, FSTL4, SYT1, PPARA, PLCB1, SEMA3D, T BX20, RIMS2, SEMA5A, BCL11A, DCC, NRG1, SEMA3C                                                                                                                                                                                                                                                                                                                                                                                                                                                                                                                                                                                                                                                                                                                                                                                                                                                                                                                                                                                                                                                                                            |
| GO:0022604 | regul ation of cell morph ogene sis                    | 0.00032742905817638993 | CD44, SEMA4D, FBXO31, CDC42EP3, ATP10A, GRIP1, KALRN, EPB41L3, PARVB, IL1RAPL1, WDPCP, MYO9A, PALMD, GAS2, CFDP1, KANK1, M ACF1, FGD4, FAM171A1, PAK3, DNMBP, SHROOM3, CUX1, RELN, EPS8, FYN, RIMS1, DOCK1, EFNA5, MARK2, NTNG1, DLC1, EPHB2, NRP1, SEM A3E, FBLN1, SH3KBP1, SYT1, PLXNA2, PTPRD, NEDD9, RIMS2, BCL11A                                                                                                                                                                                                                                                                                                                                                                                                                                                                                                                                                                                                                                                                                                                                                                                                                                                                                                                                                                                                                                                                                |
| GO:0050771 | negat ive regul ation of axono genes is                | 0.00033019726309565264 | SEMA4D, NTN1, MAP2, TNR, EPHA7, SEMA6D, EPHB2, NRP1, DAB1, SEM A3A, SEMA3E, FSTL4, SEMA3D, SEMA5A, BCL11A, DCC, SEMA3C                                                                                                                                                                                                                                                                                                                                                                                                                                                                                                                                                                                                                                                                                                                                                                                                                                                                                                                                                                                                                                                                                                                                                                                                                                                                                |
| GO:0022898 | regul ation of trans membr ane trans porte r activ ity | 0.0003521620243626539  | KCNC1, BCL2, THADA, FGF12, CACNG2, NRXN1, CACNB2, CHRM3, KCNE4, HECW1, NOS1, ANK2, PRKCE, GRM5, NLGN1, SHISA9, CFTR, NOS1AP, ANK3, CNIH3, RELN, RASGRF2, DAPK1, APP, CACNA2D1, HCN1, UTRN, RASGRF1, KCNAB1, PDE4D, ABCC9, GSG1L, AKAP6, EPHB2, TRDN, SH ISA6, CACNG3, RYR2, STAC                                                                                                                                                                                                                                                                                                                                                                                                                                                                                                                                                                                                                                                                                                                                                                                                                                                                                                                                                                                                                                                                                                                      |
| GO:0050790 | regul ation of                                         | 0.0003569681845165647  | CD44, PARN, SEMA4D, TAOK3, A2M, SLC8A1, GPR55, BCL2, MMP16, RA G1, IL6R, RCAN1, JAK2, BICD1, KALRN, GRIN2A, NRXN1, ADCYAP1R1, CACNA1C, MYO9A, NTRK2, RASGEF1B, TIAM2, NRG3, ELMO1, CABIN1, TBC1D22A, RGS12, RAPGEF5, ARHGAP24, SPRED2, SLIT2, ROR1, ZN                                                                                                                                                                                                                                                                                                                                                                                                                                                                                                                                                                                                                                                                                                                                                                                                                                                                                                                                                                                                                                                                                                                                                |

|            |                                                      |                        |                                                                                                                                                                                                                                                                                                                                                                                                                                                                                                                                                                                                                                                                                                                                                                                                                                                                                                                                                                                                                                                                                                                                                                                                                  |
|------------|------------------------------------------------------|------------------------|------------------------------------------------------------------------------------------------------------------------------------------------------------------------------------------------------------------------------------------------------------------------------------------------------------------------------------------------------------------------------------------------------------------------------------------------------------------------------------------------------------------------------------------------------------------------------------------------------------------------------------------------------------------------------------------------------------------------------------------------------------------------------------------------------------------------------------------------------------------------------------------------------------------------------------------------------------------------------------------------------------------------------------------------------------------------------------------------------------------------------------------------------------------------------------------------------------------|
|            | catalytic activity                                   |                        | F675, CSNK2A1, PSD3, RAP1GDS1, ERBB4, BID, MNAT1, RAP1A, TRIO, DUSP22, ABL2, MAP3K5, NOS1, RGS3, TBC1D5, FGD4, ITGA1, SPOCK3, GRIN2B, ROBO1, GARNL3, TNKS, BCL2L13, PRKCE, ARHGEF11, DGKI, RIN3, DNMBP, DCUN1D4, SLC1A1, GRM5, EPHA6, ARAP2, LDB2, IGF1R, NOS1AP, PTPRO, INSR, EGLN3, DOCK3, TBCD, RELN, RASGRF2, STK38, DAPK1, VAV3, APP, CCDC88A, SPOCK1, PLCE1, PAK1, FRY, GHR, RASGRF1, RIN2, STARD13, SLAMF1, RGL1, TIAM1, PHACTR1, PRIM2, ASAP2, RALGPS1, ARHGAP42, ASAP1, EGF, PDGFD, FYN, XRCC4, EPHA7, STK3, NET1, ESR1, ARHGAP12, PDE3A, RIMS1, POR, DOCK4, EPHB1, HERC1, DOCK1, FLT1, EFNA5, CDC14B, SH3BP5, MARK2, PHACTR2, RALGPS2, NTF3, MAPRE2, ARFGAP3, RIC8B, GRM7, RAPGEF2, PRKCQ, RABGAP1L, DLC1, GABBR2, APC, EPHB2, MOB3B, NBN, DOCK2, TRIM23, NRP1, RFC3, PHACTR3, DAB1, ALK, MGAT5, SIPA1L2, CCNG2, RCAN2, SERPINB7, EVI5, HDAC9, PIK3R3, MAP2K6, ARHGAP28, MTOR, KSR1, RALGAP2, FBLN1, SGSM1, BLM, NCAPG2, RGS7, SPRED1, SIPA1L3, PP2R2C, PTPRT, NTRK3, RXFP1, RAPGEF4, HMGA2, TBC1D4, DOCK9, PP1R12B, PLXNA2, PLCB1, PRKG1, RASGRP1, NLRC5, MAGI2, ABI1, DOCK10, PRKD1, TNFAIP8, TGFA, PRLR, DEPTOR, RGS6, SRGAP3, AKAP13, WDR41, NEDD9, RALGAP1, AGAP1, CHN1, NRG1, CAST, TBC1D9, ST18 |
| GO:0032412 | regulation of ion transmembrane transporter activity | 0.00037029057967441975 | KCNC1, THADA, FGF12, CACNG2, NRXN1, CACNB2, CHRM3, KCNE4, HECW1, NOS1, ANK2, PRKCE, GRM5, NLGN1, SHISA9, CFTR, NOS1AP, ANK3, CNIH3, RELN, RASGRF2, DAPK1, APP, CACNA2D1, HCN1, UTRN, RASGRF1, KCNAB1, PDE4D, ABCC9, GSG1L, AKAP6, EPHB2, TRDN, SHISA6, CACNG3, RYR2, STAC                                                                                                                                                                                                                                                                                                                                                                                                                                                                                                                                                                                                                                                                                                                                                                                                                                                                                                                                        |
| GO:0050769 | positive regulation of neurogenesis                  | 0.0004589236698642424  | SEMA4D, FBXO31, KALRN, IL1RAPL1, NTRK2, TIAM2, NUMB, SLIT2, MACF1, ROBO1, PAK3, CHODL, DSCAM, GRM5, NTN1, CUX1, RELN, CDH4, TENM4, TIAM1, DISC1, EFNA5, TRPC5, LRP2, PRKCH, EPHB2, NRP1, MTOR, GLI3, PLXNA2, PTPRD, HDAC2, ROBO2, SEMA5A, BCL11A                                                                                                                                                                                                                                                                                                                                                                                                                                                                                                                                                                                                                                                                                                                                                                                                                                                                                                                                                                 |
| GO:0008015 | blood circulation                                    | 0.00047798471783645183 | KCNMA1, SLC8A1, CD38, THRB, JAK2, FGF12, FLI1, TRHDE, RPS6KA2, CACNA1C, OCLN, ENPEP, CACNB2, CHRM3, SLIT2, MYLK3, KCNE4, RAP1GDS1, EXT2, NOS1, ITGA1, CORO2B, ANK2, BBS2, SLC1A1, CORIN, NOS1AP, PTPRO, RNLS, CACNA2D1, HCN1, CXADR, KL, ADAMTS16, ARHGAP42, VSTM4, KCND3, NAV2, SGCZ, PDE4D, PDE3A, DOCK4, ABCC9, EXT1, HDAC4, CELF2, SGCD, IMMP2L, CPS1, TRDN, ASB3, MAP2K6, MTOR, SGCG, CTNNA3, PPARA, PRKG1, ASIC2, RYR2, TBX20                                                                                                                                                                                                                                                                                                                                                                                                                                                                                                                                                                                                                                                                                                                                                                              |
| GO:2001257 | regulation of cation channel activity                | 0.0005086319930358956  | KCNC1, FGF12, CACNG2, NRXN1, CACNB2, KCNE4, NOS1, ANK2, NLGN1, SHISA9, NOS1AP, ANK3, CNIH3, RELN, RASGRF2, DAPK1, APP, CACNA2D1, HCN1, RASGRF1, KCNAB1, PDE4D, ABCC9, GSG1L, AKAP6, EPHB2, TRDN, SHISA6, CACNG3, STAC                                                                                                                                                                                                                                                                                                                                                                                                                                                                                                                                                                                                                                                                                                                                                                                                                                                                                                                                                                                            |
| GO:1904062 | regulation of cation                                 | 0.000533798537192781   | SLC8A1, KCNC1, BCL2, THADA, FGF12, CACNG2, GRIN2A, NRXN1, ADCYAP1R1, DPP6, CACNA1C, CACNB2, KCNE4, HECW1, NOS1, ANK2, GRIN2B, PRKCE, NLGN1, SHISA9, KCNIP4, NOS1AP, ANK3, CNIH3, RELN, RASGRF2, DPP10, DAPK1, APP, CACNA2D1, HCN1, UTRN, TSPAN13, RASGRF1, FYN, KCNAB1, PDE4D, ABCC9, GSG1L, AKAP6, EPHB2, TRDN, RG                                                                                                                                                                                                                                                                                                                                                                                                                                                                                                                                                                                                                                                                                                                                                                                                                                                                                              |



|                |                                                                                                                                     |                           |                                                                                                                                                                                                                                                                                                                                                                                                                                                                                                                                                                                                                                                                                                                                                                                                                                                                           |
|----------------|-------------------------------------------------------------------------------------------------------------------------------------|---------------------------|---------------------------------------------------------------------------------------------------------------------------------------------------------------------------------------------------------------------------------------------------------------------------------------------------------------------------------------------------------------------------------------------------------------------------------------------------------------------------------------------------------------------------------------------------------------------------------------------------------------------------------------------------------------------------------------------------------------------------------------------------------------------------------------------------------------------------------------------------------------------------|
|                | n<br>trans<br>membr<br>ane<br>trans<br>port                                                                                         |                           | S7,SHISA6,CACNG3,PRKD1,RYR2,STAC                                                                                                                                                                                                                                                                                                                                                                                                                                                                                                                                                                                                                                                                                                                                                                                                                                          |
| GO:00<br>50890 | cogni<br>tion                                                                                                                       | 0.000564216<br>0406530876 | DNAH11,RAG1,KCNK10,RCAN1,KALRN,BTBD9,GRIN2A,NRXN1,NTRK2,SHANK2,GABRA5,ITGA8,GRIN2B,BRINP1,DGKI,SLC1A1,GRM5,CNTNAP2,INSR,RELN,TNR,APP,RASGRF1,MEIS2,FYN,GRIA1,S100B,AMFR,SORCS3,TUSC3,NTF3,CAMK4,ATXN1,NRXN3,UBE3A,EPHB2,TANC1,SPECC1,CSMD1,PLCB1,ELAVL4,ATP8A1,NEDD9                                                                                                                                                                                                                                                                                                                                                                                                                                                                                                                                                                                                      |
| GO:00<br>32409 | regul<br>ation<br>of<br>trans<br>porte<br>r<br>activ<br>ity                                                                         | 0.000652542<br>921089627  | KCNC1,BCL2,THADA,FGF12,CACNG2,NRXN1,CACNB2,CHRM3,KCNE4,HECW1,NOS1,ANK2,NDFIP2,PRKCE,GRM5,NLGN1,SHISA9,CFTR,NOS1AP,ANK3,CNIH3,RELN,RASGRF2,DAPK1,APP,CACNA2D1,HCN1,UTRN,RASGRF1,KCNAB1,PDE4D,ABCC9,GSG1L,AKAP6,EPHB2,TRDN,SHISA6,CACNG3,RYR2,STAC                                                                                                                                                                                                                                                                                                                                                                                                                                                                                                                                                                                                                          |
| GO:00<br>50877 | nervo<br>us<br>syste<br>m<br>proce<br>ss                                                                                            | 0.000704315<br>9352103833 | CAMTA1,COL18A1,THRB,DNAH11,RAG1,GRIK2,IGSF11,UNC13B,SCN11A,KCNK10,DLGAP1,RCAN1,KALRN,USH2A,FGF12,CACNG2,BTBD9,GRIN2A,NRXN1,RPS6KA2,KCNH1,BBS9,MYO9A,NTRK2,NCAM2,TMPRSS3,SLC24A4,CACNB2,TRPM3,SHANK2,GABRA5,ROR1,CRB1,MYO3B,OR4C46,SPAG16,HTR2C,GABRR2,HMCN1,ITGA8,GABRG1,EYA1,P2RX6,GRIN2B,GABRA2,BRINP1,BBS2,MYO3A,DGKI,ANKFN1,SLC1A1,GRM5,NLGN1,DNAH9,SHISA9,OR9Q1,JAM2,CNTNAP2,INSR,ANK3,LHFPL3,RELN,TNR,CELF4,APP,GNAL,CHRM5,TENM4,RASGRF1,RBFOX1,MEIS2,PIEZO2,VTG1A,FYN,GRIA1,NAV2,S100B,PCDH15,GABRG3,GRM1,CNTN5,LRIG1,RIMS1,EPHB1,EFEMP1,HERC1,AMFR,SORCS3,POU6F2,TUSC3,GRID2,LRP2,NTF3,CAMK4,TMEM108,GABRB3,GRM7,ATXN1,GABRG2,NRXN3,KCND2,ATP8A2,UBE3A,LOXHD1,EPHB2,NBN,RPGRIP1,TANC1,MTOR,RORB,GABRB1,SPICE1,CSMD1,SLC24A2,SHISA6,PLCB1,ELAVL4,TSHZ3,ASIC2,TRPM1,CACNG3,ATP8A1,OR11G2,MTMR2,ATF6,EYS,CDH23,NEDD9,RIMS2,STAC,SCN8A,EYA4,DLGAP2,OR4N2,CTNNA2,PARD3 |
| GO:00<br>07157 | heter<br>ophil<br>ic<br>cell-<br>cell<br>adhes<br>ion<br>via<br>plasm<br>a<br>membr<br>ane<br>cell<br>adhes<br>ion<br>molec<br>ules | 0.000768098<br>8840274947 | NRXN1,IL1RAPL1,CRB1,HMCN1,NLGN1,CDH4,CXADR,TENM4,ALCAM,IGSF21,TENM3,GRID2,CDH2,TENM2,PTPRD                                                                                                                                                                                                                                                                                                                                                                                                                                                                                                                                                                                                                                                                                                                                                                                |
| GO:00<br>90066 | regul<br>ation<br>of<br>anato<br>mical<br>struc<br>ture                                                                             | 0.000819349<br>4369769914 | KCNMA1,SEMA4D,SLC12A8,SLC8A1,CD38,CDC42EP3,MTPN,CHRM3,SLIT2,AKT3,RAP1GDS1,KANK1,MACF1,EXT2,NOS1,ITGA1,PLS1,PAK3,FCHSD2,PRKCE,BBS2,DSCAM,RIN3,SLC12A1,NTN1,SPTB,MAP2,CDH4,TNR,VAV3,EPS8,PRR16,DISC1,FMN1,ARHGAP42,VSTM4,EPHA7,DOCK4,FHOD3,EXT1,EFNA5,TRPC5,SEMA6D,FER,CPS1,NRP1,SEMA3A,SEMA3E,FSTL4,ARHGAP28,MTOR,PRKG1,ASIC2,SEMA3D,DEPTOR,SEMA5A,BCL11A,DCC,SEMA3C                                                                                                                                                                                                                                                                                                                                                                                                                                                                                                       |

|            |                                             |                       |                                                                                                                                                                                                                                                                                                                                                                                                                                                                                                                                                                                                                                                                                                                                                                                                                                                                                                                                                                                                                                                                                                                                                                                                                                                                                                                                                                                                                                                                                                                                                                                                                                                                                                                                                                                                                                                                                                                                                                                                                                                                                                                                                                                                                                                                                                                                                                                                                                                                                                                                                                                                                                                                                                                                                                                                                                                                                                                                                                                                                                                                                                |
|------------|---------------------------------------------|-----------------------|------------------------------------------------------------------------------------------------------------------------------------------------------------------------------------------------------------------------------------------------------------------------------------------------------------------------------------------------------------------------------------------------------------------------------------------------------------------------------------------------------------------------------------------------------------------------------------------------------------------------------------------------------------------------------------------------------------------------------------------------------------------------------------------------------------------------------------------------------------------------------------------------------------------------------------------------------------------------------------------------------------------------------------------------------------------------------------------------------------------------------------------------------------------------------------------------------------------------------------------------------------------------------------------------------------------------------------------------------------------------------------------------------------------------------------------------------------------------------------------------------------------------------------------------------------------------------------------------------------------------------------------------------------------------------------------------------------------------------------------------------------------------------------------------------------------------------------------------------------------------------------------------------------------------------------------------------------------------------------------------------------------------------------------------------------------------------------------------------------------------------------------------------------------------------------------------------------------------------------------------------------------------------------------------------------------------------------------------------------------------------------------------------------------------------------------------------------------------------------------------------------------------------------------------------------------------------------------------------------------------------------------------------------------------------------------------------------------------------------------------------------------------------------------------------------------------------------------------------------------------------------------------------------------------------------------------------------------------------------------------------------------------------------------------------------------------------------------------|
| GO:0048519 | negative regulation of biological processes | 0.0008636836456892352 | CD44, SAMD4A, KCNMA1, ZHX3, APBB2, PTPRR, SCAF8, RTN1, PARN, SEMA4D, INIP, RPS6KA5, TAOK3, PRKCB, A2M, SLC8A1, ANKRD6, GPR55, DNAJC15, SIAH3, CD38, FBXO31, PIWIL3, BCL2, SAMS1, CHFR, THADA, COL18A1, TOX3, THRB, RAG1, GRIK2, SNX25, KDM4B, IL6R, ZBTB20, SKAP2, BRD4, ZNF568, NDRG2, ASTN2, RCAN1, JAK2, BICD1, MIR17HG, ABCG8, OTUD7A, TPTE2, KALRN, USH2A, ZNF536, ZBTB7C, GRIN2A, NRXN1, IL1RAPL1, ADCYAP1R1, CTD1, RPS6KA2, CACNA1C, BMF, CTNNA1, NTRK2, FOXN3, OCLN, NLK, MYT1L, SRGAP2B, IQCJ-SCHIP1, SMARCA4, RNF152, ZNRF3, MEOX2, TTC39B, GLIS3, NRG3, PTPRG, SLC24A4, GRIK3, PDE10A, NUMB, MTPN, SOX6, MECOM, RGS12, SHANK2, GABRA5, DLG5, CFDP1, ARHGAP24, SPRED2, SLIT2, ABCA5, ZNF675, CSNK2A1, AKT3, KCNE4, TRIM5, ALPK2, HECW1, RAP1GDS1, ERBB4, KANK1, ATRX, DMRT1, BID, MNAT1, RAP1A, TRIO, PTPRE, DUSP22, CHSY1, ABL2, PSMA1, NOS1, ABCG1, RGS3, RERG, HTR2C, CTIF, CNTN4, SAMD13, SLC40A1, SND1, ETS2, ITGA1, HIRA, CORO2B, RUNX1, KIR3DL2, ALDH1A2, PTGFR, EYA1, MORC3, SPOCK3, SPON1, ANK2, ZBTB16, SLIT3, GRIN2B, PHC2, ROBO1, TNKS, KLF12, NDFIP2, MDM1, OVOL2, ITPR2, BRINP1, MLLT3, LEMD3, GABPA, TMEM67, PRKE, GLIS1, PSG9, PRKAA2, PACRG, BBS2, CDYL2, DSCAM, DGKI, RIN3, KDM4C, SLC1A1, GRM5, NTN1, LDB2, IGF1R, SPTB, NLGN1, JAM2, MAP2, CAMK1D, PTPRO, CD96, RBMS3, CLEC16A, CUX1, ANK3, MORC2, TBCE, TRPS1, ADAMTS5, STK38, AOA, TNF, CELF4, DAPK1, INP5A, APP, PUM1, KCTD1, RNLS, SPOCK1, PAK1, MITF, IGF2BP3, ADCK1, HCN1, PPP1R13B, FRY, CXADR, EPS8, LRFN5, GHR, DUX4, PRDM16, FRMD5, USP7, MEIS2, KIR2DL4, STARD13, AVEN, LTBP1, SLAMF1, BACE2, RARB, FOXCAD, PBX1, MLIP, SORCS2, ARHGAP42, ZFPM2, ASAP1, PCBP3, EGF, FYN, EPHA7, FHIT, GRIA1, TRABD2B, STK3, CNOT7, MSR1, USP18, ESR1, ARHGAP12, KCNAB1, PDE4D, PRKACB, PDE3A, POR, L3MBTL4, DOCK4, FRMD4A, WWOX, EPHB1, CREM, FHOD3, EFEMP1, TNRC6B, AJAP1, HRC1, PARP15, FLT1, EFNA5, NXN, CDC14B, HDAC4, TRPC5, AMFR, ATP9A, FTO, SH3BP5, AKAP6, SORCS3, ATF2, RBBP8, GRID2, ZNF423, LRPP2, SEMA6D, NTF3, FER, SUS4, TP53I11, TPTE, GRM7, RAPGEF2, NAV3, MX1, GTF2I, ATXN1, PRKCQ, PRKCH, RHPN2, DLG1, ATP8A2, SLC24A3, UBE3A, GRIA4, APC, ZBTB25, TFF1, EPHB2, SCAF4, AGO3, MCTP1, RYR3, NBAS, PRTG, NBN, ADAMTS18, PACSIN2, PKP1, NRP1, CDH13, DACH1, TRDN, ZNF397, DAB1, ALK, LDLRAD4, SEMA3A, SEMA3E, MGA5, MALRD1, MYEF2, DCLK1, NRIP1, CDH2, ARID5B, TENM2, SERPINB7, HDAC9, PIK3R3, MAP2K6, FSTL4, ARHGAP28, MTOR, RORB, FBLN1, BLM, FHL2, NEU3, NCAPG2, RGS7, CD2AP, USP25, SPRED1, ADAM10, SCAI, PTPRT, TRERF1, SLC24A2, GLI3, NTRK3, FBN1, ABHD17C, TBX15, BMPER, ATF7IP, HMGA2, NSUN2, PTPRK, TBC1D4, DNMT3, APIP, ASXL3, DPF3, NPHP4, SACS, PPARA, PLXNA2, PTPRD, RORA, SHISA6, PLCB1, LOXL2, BPTF, PRKG1, ELAVL4, NLRC5, STXB6, MXI1, MAGI2, NELL1, PLCL1, ABI1, TSHZ3, ASIC2, PRKD1, TNFAIP8, BCL2L1, HDAC2, ETS1, TNN, RYR2, SEMA3D, BANP, TGFA, PRLR, TBX20, FAT3, MTMR2, VCL, DEPTOR, BACH1, ROBO2, ZMYND11, RGS6, SRGAP3, WDR41, NEDD9, ENPP1, EYA4, L3MBTL3, SEMA5A, PRDM15, BCL11A, DCC, CTNNA2, PVT1, ETV6, VPS13C, PARD3, NRG1, CAST, FANK1, PRKCA, FMN2, SEMA3C, FANCB, ST18 |
| GO:0035637 | multicellular organismal signaling          | 0.0008792703222121363 | SLC8A1, GRIK2, SCN11A, FGF12, CACNG2, CACNA1C, NTRK2, CACNB2, KCNE4, ANK2, CORIN, CNTNAP2, ANK3, TNF, CACNA2D1, HCN1, CHRM5, CXADR, KCND3, PDE4D, ABCC9, KCND2, TRDN, MTOR, CTNNA3, CACNG3, RYR2, SCN8A                                                                                                                                                                                                                                                                                                                                                                                                                                                                                                                                                                                                                                                                                                                                                                                                                                                                                                                                                                                                                                                                                                                                                                                                                                                                                                                                                                                                                                                                                                                                                                                                                                                                                                                                                                                                                                                                                                                                                                                                                                                                                                                                                                                                                                                                                                                                                                                                                                                                                                                                                                                                                                                                                                                                                                                                                                                                                        |
| GO:0006936 | muscle contraction                          | 0.0009312059739069467 | KCNMA1, APBB2, SLC8A1, CD38, FGF12, CACNA1C, CACNB2, CHRM3, CALD1, DTNA, KCNE4, RAP1GDS1, MYOM1, NOS1, P2RX6, ANK2, SMPX, ARHGEF11, BBS2, MYOM2, NOS1AP, PLCE1, CACNA2D1, UTRN, MYH13, ARHGAP42, KCND3, PDE4D, DOCK4, ABCC9, HDAC4, SGCD, SSPN, ATP8A2, SNTB1, TRDN, ASB3, MAP2K6, MTOR, CTNNA3, PPP1R12B, PRKG1, RYR2, TBX20, STAC                                                                                                                                                                                                                                                                                                                                                                                                                                                                                                                                                                                                                                                                                                                                                                                                                                                                                                                                                                                                                                                                                                                                                                                                                                                                                                                                                                                                                                                                                                                                                                                                                                                                                                                                                                                                                                                                                                                                                                                                                                                                                                                                                                                                                                                                                                                                                                                                                                                                                                                                                                                                                                                                                                                                                            |
| GO:00      | regulation                                  | 0.000938588           | KCNMA1, SEMA4D, SLC12A8, MTPN, AKT3, MACF1, DSCAM, SLC12A1, N                                                                                                                                                                                                                                                                                                                                                                                                                                                                                                                                                                                                                                                                                                                                                                                                                                                                                                                                                                                                                                                                                                                                                                                                                                                                                                                                                                                                                                                                                                                                                                                                                                                                                                                                                                                                                                                                                                                                                                                                                                                                                                                                                                                                                                                                                                                                                                                                                                                                                                                                                                                                                                                                                                                                                                                                                                                                                                                                                                                                                                  |

|            |                                                           |                       |                                                                                                                                                                                                                                                                                                                                                                                                                                                                                                                                                                                                                                                                                                                                                                                                                                                                                                                                                                                                                                                                                                                                                                                                                                                                                                                                                                                                                                                                                                                                                                                                                                                                                                                                                                                                                                                                                                                                                                                                                                                                                                                                                                                                                                                                                                                                                                                                                                                                                                                                                                                                                                                                                                                                                                                                                                                                                                                                                                                                                                                                                                                                                                                                                                         |
|------------|-----------------------------------------------------------|-----------------------|-----------------------------------------------------------------------------------------------------------------------------------------------------------------------------------------------------------------------------------------------------------------------------------------------------------------------------------------------------------------------------------------------------------------------------------------------------------------------------------------------------------------------------------------------------------------------------------------------------------------------------------------------------------------------------------------------------------------------------------------------------------------------------------------------------------------------------------------------------------------------------------------------------------------------------------------------------------------------------------------------------------------------------------------------------------------------------------------------------------------------------------------------------------------------------------------------------------------------------------------------------------------------------------------------------------------------------------------------------------------------------------------------------------------------------------------------------------------------------------------------------------------------------------------------------------------------------------------------------------------------------------------------------------------------------------------------------------------------------------------------------------------------------------------------------------------------------------------------------------------------------------------------------------------------------------------------------------------------------------------------------------------------------------------------------------------------------------------------------------------------------------------------------------------------------------------------------------------------------------------------------------------------------------------------------------------------------------------------------------------------------------------------------------------------------------------------------------------------------------------------------------------------------------------------------------------------------------------------------------------------------------------------------------------------------------------------------------------------------------------------------------------------------------------------------------------------------------------------------------------------------------------------------------------------------------------------------------------------------------------------------------------------------------------------------------------------------------------------------------------------------------------------------------------------------------------------------------------------------------------|
| 08361      | ation<br>of<br>cell<br>size                               | 3404210717            | TN1,MAP2,CDH4,TNR,VAV3,PRR16,DISC1,EPHA7,EFNA5,TRPC5,SEMA6D,NRP1,SEMA3A,SEMA3E,FSTL4,MTOR,SEMA3D,DEPTOR,SEMA5A,BCL11A,DCC,SEMA3C                                                                                                                                                                                                                                                                                                                                                                                                                                                                                                                                                                                                                                                                                                                                                                                                                                                                                                                                                                                                                                                                                                                                                                                                                                                                                                                                                                                                                                                                                                                                                                                                                                                                                                                                                                                                                                                                                                                                                                                                                                                                                                                                                                                                                                                                                                                                                                                                                                                                                                                                                                                                                                                                                                                                                                                                                                                                                                                                                                                                                                                                                                        |
| GO:0071840 | cellular<br>component<br>organization<br>or<br>biogenesis | 0.0009479119870233036 | CD44,KCNMA1,C10ORF90,APBB2,SCAF8,PARN,SEMA4D,SLC12A8,ZFYVE1,TEAD1,NFIA,RPS6KA5,TAOK3,PRKCB,TRPM6,KCNC1,DNAJC15,SIAH3,CD38,FBXO31,TRAPPC9,BCL2,MMP16,CHFR,COL18A1,CDC42BPA,RAG1,SAMM50,CDC42EP3,UNC13B,NCAM1,KDM4B,CDH8,ATP10A,SORBS2,SKAP2,BRD4,GRIPI1,TLK1,TANC2,KIF4A,CSMD3,NTN4,JAK2,TM9SF4,BICD1,ABCG8,KALRN,NEGR1,CACNG2,BTBD9,EPB41L3,LAMA1,PARVB,CDH11,CDS2,MAST4,NRXN1,ARID1B,IL1RAPL1,WDPCP,MAGI1,LAMA3,ADAMTS17,CTDP1,ADAMTS6,PRELID2,GOLGA8J,RPS6KA2,SMOC2,ZDHHC17,CCSER2,BMF,EXOC4,PNPLA3,ANO4,BBS9,CTNNA1,MYO9A,NTRK2,OCN,THSD7A,AFAP1,NCAM2,TIAM2,IQCI-SCHIP1,LRRRC49,SMARCA4,CNTN1,NRG3,PTPRG,ELMO1,CABIN1,SYNE1,GAS2,CACNB2,NUMB,MED15,MTPN,ESYT2,MECOM,SYBU,PDE4DIP,TRPM3,DNAH8,SHANK2,PTGFRN,KCTD8,CHCHD6,UNC5D,NREP,DLG5,CFDP1,PGM5,SMARCA4,CALD1,ARHGAP24,IGHV10R15-9,SLIT2,PITPNC1,MYLK3,ABCA5,ROR1,ADAMTSL1,CSNK2A1,AKT3,CRB1,KMT2C,KCNS3,ABCA13,HECW1,RAP1GDS1,ERBB4,KANK1,GPHN,ATRX,DMRT1,BID,MACF1,MNAT1,RAP1A,TRIO,RAD51B,TRMT61B,DUSP22,URB1,ABL2,ACACA,ABCG1,SPAG16,EML1,RERG,CCDC141,CNTN4,TBC1D5,PIK3C3,SNAP25-AS1,CHD6,HMCN1,FGD4,GOLGA6D,ITGA1,HIRA,CORO2B,ITGA8,RUNX1,ALDH1A2,MAPK9,IGHV10R21-1,FAM171A1,CDH17,PEAK1,EYA1,ADAMTS19,CDH18,HSF2BP,FRMD6,PLS1,ANK2,SLC1A2,SLIT3,GRIN2B,ZNF518A,ROBO1,ANKRD30BL,EGFLAM,PAK3,DGKB,TNKS,GABRA2,MDM1,FCHSD2,MLLT3,TRAPPC10,LEMD3,CHODL,EHBP1,PSTPIP2,ITGB3BP,TMEM67,PRKCE,ARHGEF11,PRKAA2,BBS2,IL1RAPL2,CHCHD3,MYO2,NUBPL,DSCAM,RIN3,ANKFN1,TRAPPC8,KDM4C,SDK1,SLC1A1,SLC12A1,GRM5,EPHA6,NTN1,LDB2,IGF1R,SPTB,WDR72,SNX30,NLGN1,DNAH9,SHROOM3,CNTNAP2,MAP2,CAMK1D,FLRT2,NOS1AP,PTPRO,MATN2,INSR,COBL,MDN1,CLEC16A,MTRF1,CRTAC1,CUX1,ANK3,CDH12,MORC2,THSD4,TBCD,GPC6,RELN,ADAMTS5,ADAMTSL3,CDH4,TNR,CELF4,VAV3,VRK1,CNTN6,APP,FBLN5,CCDC88A,KCTD1,SPOCK1,HPSE2,PLCE1,TACC2,PAK1,ATP9B,MITF,ADCK1,HCN1,TOP3A,NSMCE2,FRY,CXADR,EPS8,LRFN5,UTRN,TENM4,CECR2,PRR16,RASGRF1,PRDM16,FRMD5,USP7,STARD13,SCP2,LRRRC4C,ALCAM,PPP1R9A,PDZRN3,ADAMTS16,MICU1,SLAMF1,INO80D,CLSTN2,TTL11,NEBL,WDR12,TCF4,FRYL,TIAM1,PHACTR1,SLC39A12,DISC1,FMN1,CHAF1A,SVEP1,VTI1A,ASAP1,FRMPD4,COL23A1,EGF,FYN,KCND3,PRMT8,IFT43,LRBA,EPHA7,MAP7,NSG2,TRABD2B,SPIDR,NAV2,STK3,CNOT7,COL19A1,MSR1,PSIP1,S100B,NET1,TOX,PCDH15,ESSR1,ARHGAP12,SGCZ,CNTN5,ERC2,PRKACB,PDE3A,RIMS1,L3MBTL4,CNKSR2,EPHB1,CTTNBP2,FHOD3,ARMC2,IGSF21,MIPEP,SNAP29,GSGL1,HERC1,DOCK1,DIAPH3,TRPM7,EXT1,EFNA5,CDC14B,TLN2,C14ORF39,HDAC4,STK36,KLHL1,TRPC5,MRM1,ATP9A,PPFIA2,AKAP6,VPS37A,TENM3,LINGO2,MARK2,ATF2,PHACTR2,GRID2,ZNF423,LRP2,SEMA6D,NTF3,FER,TTC29,CELF2,NTNG1,DDX10,MAPRE2,ARFGAP3,RAD51AP1,TMEM108,GABRB3,GRM7,SLC39A8,RAPGEF2,NAV3,IMMP2L,PRKCQ,KIRREL3,GABRG2,NUDCD3,PRKCH,NRXN3,RHPN2,KRT25,DLC1,NSG1,KCND2,ATP8A2,UBE3A,MPRIP,APC,TTL5,INO80,AUTS2,EPHB2,SCAF4,ERC1,PDLIM5,AGO3,C9,MCTP1,RNU1-51P,RYR3,PRTG,NBN,ADAMTS18,CTNND2,FRMD3,COL22A1,SETD2,PACSIN2,PKP1,DOCK2,SDCCAG8,NRP1,CDH13,RFC3,PHACTR3,RPGRIP1,TRDN,DAB1,RFTN1,ALK,EXOC6B,LDLRAD4,SEMA3A,SEMA3E,DCLK1,CDH2,TENM2,TANC1,VPS41,SYCP1,HDAC9,FSTL4,ARHGAP28,MTOR,STK38L,FBLN1,BLM,SH3KBP1,NEU3,NCAPG2,CD2AP,TTC39C,CLVS2,SIPA1L3,ADAM10,TSPAN33,KANSL1,LRFN2,FLNB,PAPPA2,SPECC1,GLI3,NTRK3,RXFP1,HYDIN,CHKA,RAB31,CTNNA3,VPS13D,ABHD17C,ANKRD31,ATF7IP,HMGA2,THSD7B,PTPRK,TBC1D4,DNM3,SYT1,APIP,SYNDIG1,DPF3,NPHP4,SACS,PPARA,P |

|            |                                                                 |                       |                                                                                                                                                                                                                                                                                                                                                                                                                                                                                                                                                                                                                                                                                                                                                                                                                                                                                                                                                                |
|------------|-----------------------------------------------------------------|-----------------------|----------------------------------------------------------------------------------------------------------------------------------------------------------------------------------------------------------------------------------------------------------------------------------------------------------------------------------------------------------------------------------------------------------------------------------------------------------------------------------------------------------------------------------------------------------------------------------------------------------------------------------------------------------------------------------------------------------------------------------------------------------------------------------------------------------------------------------------------------------------------------------------------------------------------------------------------------------------|
|            |                                                                 |                       | LXNA2, PTPRD, SHISA6, SCARA5, PLCB1, LOXL2, BPTF, PRKG1, ELAVL4, CDH9, STXBP6, MAGI2, STX12, ABI1, ASIC2, RALA, DOCK10, GNP TAB, TRPM1, PRKD1, ATP8A1, BCL2L1, MICAL3, HDAC2, ETS1, TNN, SEMA3D, BANP, TGFA, PRLR, TBX20, PTPRA, FAT3, MTMR2, VCL, DEPTOR, ATAT1, ROBO2, IFT81, ZMYND11, CDH23, AKAP13, NEDD9, ENPP1, UNC13C, RIMS2, RAB27A, EYA4, L3MBTL3, CLIP1, SEMA5A, BCL11A, DCC, CTNNA2, CEP44, PVT1, PARD3B, CHN1, ETV6, VPS13C, PARD3, NRG1, CAST, ATP10B, PRKCA, FMN2, SEMA3C, PCNT, OSBPL5, TOP1                                                                                                                                                                                                                                                                                                                                                                                                                                                    |
| GO:0098662 | inorganic cation transport                                      | 0.0009521051716197967 | KCNMA1, SLC12A8, TRPM6, SLC8A1, KCNC1, BCL2, THADA, KCNQ5, SCN11A, KCNJ6, KCNK10, FGF12, CACNG2, GRIN2A, NIPA2, ADCYAP1R1, DPP6, ZDHHC17, KCNH1, CACNA1C, SLC24A4, CACNB2, TRPM3, SLC4A4, KCNE4, KCNS3, HECW1, NOS1, HTR2C, CACNA1E, SLC40A1, SLC9C1, ANK2, GRIN2B, ITPR2, CACNA2D3, PRKCE, KCNH8, SLC1A1, SLC12A1, KCNIP4, NOS1AP, CATSPER2, ANK3, DPP10, CACNA2D1, HCN1, UTRN, TSPAN13, MICU1, SLC39A12, FYN, KCND3, KCNN3, KCNAB1, PDE4D, ATP6V1E1, ABCC9, TRPM7, TRPC5, AKAP6, TUSC3, MICU2, SLC39A8, KCND2, SLC24A3, RYR3, TRDN, RGS7, SLC24A2, SCARA5, ASIC2, TRPM1, CACNG3, PRKD1, RYR2, KCNH5, TMEM163, SLC39A11, SLC5A1, STAC, SCN8A, KCNJ15                                                                                                                                                                                                                                                                                                          |
| GO:0007156 | homophilic cell adhesion via plasma membrane adhesion molecules | 0.001287385134566112  | IGSF11, CDH8, CDH11, CNTN4, HMCN1, CDH17, CDH18, ROBO1, DSCAM, SDK1, PCDH9, CDH12, CDH4, CNTN6, PCDH7, CLSTN2, PCDH15, PCDH11X, IGSF21, TENM3, KIRREL3, CDH13, CDH2, PTPRT, CDH9, FAT3, ROBO2, CDH23                                                                                                                                                                                                                                                                                                                                                                                                                                                                                                                                                                                                                                                                                                                                                           |
| GO:0060998 | regulation of dendritic spine development                       | 0.0012916836924163884 | TANC2, KALRN, DLG5, PAK3, SDK1, NLGN1, RELN, DISC1, ASAP1, PPF1A2, UBE3A, EPHB2, FSTL4, DNM3, HDAC2                                                                                                                                                                                                                                                                                                                                                                                                                                                                                                                                                                                                                                                                                                                                                                                                                                                            |
| GO:0007626 | locomotory behavior                                             | 0.0013151586064768937 | APBA2, RCAN1, KALRN, NEGR1, FGF12, BTBD9, CNTN1, SHANK2, ASTN1, HTR2C, PRKCE, DSCAM, ANKFN1, SLC1A1, GRM5, RELN, TNFR, APP, PUM1, EPS8, NAV2, PCDH15, GRM1, KLHL1, KCND2, UBE3A, DAB1, ALK, MTOR, ELAVL4, CDH23, NRG1                                                                                                                                                                                                                                                                                                                                                                                                                                                                                                                                                                                                                                                                                                                                          |
| GO:0048585 | negative regulation of response to stimulus                     | 0.0013950934655214413 | CD44, PTPRR, SEMA4D, TAOK3, PRKCB, A2M, ANKRD6, BCL2, SAMS1, SNX25, BRD4, NDRG2, RCAN1, BICD1, OTUD7A, ZNF536, NRXN1, CTNNA1, NLK, SMARCA4, RNF152, ZNRF3, SLC24A4, PDE10A, MECOM, RGS12, SHANK2, DLG5, ARHGAP24, SPRED2, SLIT2, ZNF675, CSNK2A1, ALPK2, HECW1, KANK1, BID, PTPRE, DUSP22, ABL2, PSMA1, RGS3, ITGA1, EYA1, SLIT3, ROBO1, OVOL2, MLLT3, LEMD3, PRKAA2, BBS2, RIN3, GRM5, IGF1R, PTPRO, CD96, RBMS3, STK38, AOA1, TNFR, CELF4, LRFN5, PRDM16, KIR2DL4, LTBP1, SLAMF1, MLIP, ARHGAP42, FYN, TRABD2B, STK3, CNOT7, USP18, ESR1, ARHGAP12, PDE4D, PRKACB, PDE3A, WWOX, AJAP1, NXN, AMFR, GRID2, LRP2, SEMA6D, FER, SUS4, PRKCQ, DLC1, APC, EPHB2, MCTP1, ADAMTS18, NRP1, DAB1, LDLRAD4, SEMA3A, SEMA3E, CDH2, FSTL4, MTOR, FBLN1, FHL2, RGS7, CD2AP, USP25, SPRED1, SCAI, PTPRT, GLI3, FBN1, BMPER, HMGA2, NPHP4, PPARA, PTPRD, RORA, SHISA6, PRKG1, NLRC5, MAGI2, BCL2L1, HDAC2, TNN, SEMA3D, TBX20, MTMR2, DEPTOR, ROBO2, ZMYND11, RGS6, WDR41, E |

|            |                                                  |                       |                                                                                                                                                                                                                                                                                                                                                                                                                                                                                                                                                                                                                                                                                                                                                                                                                                                                                                                                                                                                                                                                                   |
|------------|--------------------------------------------------|-----------------------|-----------------------------------------------------------------------------------------------------------------------------------------------------------------------------------------------------------------------------------------------------------------------------------------------------------------------------------------------------------------------------------------------------------------------------------------------------------------------------------------------------------------------------------------------------------------------------------------------------------------------------------------------------------------------------------------------------------------------------------------------------------------------------------------------------------------------------------------------------------------------------------------------------------------------------------------------------------------------------------------------------------------------------------------------------------------------------------|
|            |                                                  |                       | NPP1, EYA4, SEMA5A, PRDM15, CTNNA2, VPS13C, NRG1, SEMA3C, FANCB                                                                                                                                                                                                                                                                                                                                                                                                                                                                                                                                                                                                                                                                                                                                                                                                                                                                                                                                                                                                                   |
| GO:0099601 | regulation of neurotransmitter receptor activity | 0.0015090479249697459 | DLGAP1, CACNG2, NRXN1, NLGN1, SHISA9, CNIH3, RELN, RASGRF2, DAPK1, APP, RASGRF1, GSG1L, EPHB2, SHISA6, CACNG3, DLGAP2                                                                                                                                                                                                                                                                                                                                                                                                                                                                                                                                                                                                                                                                                                                                                                                                                                                                                                                                                             |
| GO:0051965 | positive regulation of synapse assembly          | 0.0015090479249697459 | SEMA4D, NRXN1, IL1RAPL1, NTRK2, DLG5, NLGN1, FLRT2, CLSTN2, EPHB1, EFNA5, LINGO2, GRID2, EPHB2, SYNDIG1, PTPRD, ASIC2                                                                                                                                                                                                                                                                                                                                                                                                                                                                                                                                                                                                                                                                                                                                                                                                                                                                                                                                                             |
| GO:0003015 | heart process                                    | 0.0016687339656148818 | SLC8A1, THRB, JAK2, FGF12, RPS6KA2, CACNA1C, CACNB2, KCNE4, RAP1GDS1, EXT2, NOS1, ANK2, SLC1A1, CORIN, NOS1AP, RNLS, CACNA2D1, HCN1, CXADR, FYN, KCND3, SGCZ, PDE4D, ABCC9, EXT1, HDAC4, CELF2, SGCD, TRDN, ASB3, MAP2K6, MTOR, SGCG, CTNNA3, RYR2, AKAP13                                                                                                                                                                                                                                                                                                                                                                                                                                                                                                                                                                                                                                                                                                                                                                                                                        |
| GO:0016192 | vesicle-mediated transport                       | 0.0017746966838272607 | SYN3, PRKCB, TRAPPC9, UNC13B, GRIP1, APBA2, TM9SF4, BICD1, LRP1B, KALRN, CACNG2, BTBD9, NRXN1, IL1RAPL1, AMPH, EXOC4, HEATR5A, ENTHD1, TMPRSS3, ELMO1, CACNB2, NUMB, ESYT2, IGHV10R15-9, ABCA13, MACF1, RAP1A, ABL2, TBC1D5, PIK3C3, IGHV10R21-1, ANK2, FCHSD2, TRAPPC10, EHBP1, PRKCE, CD163, BBS2, DGKI, RIN3, TRAPPC8, SLC1A1, IGF1R, NLGN1, MON2, CFTR, CAMK1D, INSR, CLEC16A, CUX1, ANK3, CNIH3, VAV3, APP, PAK1, ATP9B, CECR2, GHR, RIN2, USP7, SLAMF1, VTI1A, EGF, FYN, NSG2, GRIA1, MSR1, AP2B1, ARHGAP12, ERC2, RIMS1, SNAP29, GSG1L, DOCK1, ATP9A, VPS37A, CDC91, LRP2, C2, NTF3, FER, ARFGAP3, TMEM108, NRXN3, RABGAP1L, NSG1, UBE3A, EPHB2, STON1-GTF2A1L, SYT16, ERC1, MCTP1, NBAS, PACSIN2, DOCK2, TRIM23, NRPI1, CDH13, EXOC6B, DCLK1, KIF16B, CDH2, EVI5, VPS41, SH3KBP1, CADPS, NEU3, CD2AP, AP5M1, RAB31, RAPGEF4, TMPRSS2, TMPRSS15, SORCS1, TBC1D4, DNM3, SYT1, SYNDIG1, SCFD2, SCARA5, LOXL2, RASGRP1, STXBP6, DMBT1, MAGI2, STX12, RALA, CACNG3, PRKD1, BCL2L1, MICAL3, LDLRAD3, MTMR2, WDR41, ENPP1, UNC13C, RIMS2, RAB27A, VPS13C, NRG1, FMN2, OSBPL5     |
| GO:0009987 | cellular process                                 | 0.0017960208134453813 | CD44, SAMD4A, KCNMA1, C10ORF90, PKNOX2, ZHX3, APBB2, PTPRR, SCAF8, CPXM2, RTN1, ERG, PARN, PDE1C, SEMA4D, INIP, SLC12A8, ME D13L, ZFYVE1, EVC, TEAD1, NFIA, SYN3, RPS6KA5, DHRS11, TAOK3, GADL1, PRKCB, EIF4G3, A2M, TRPM6, CPNE4, SLC8A1, ANKRD6, KCNC1, GPR55, DNAJC15, SIAH3, CD38, ZNF257, FBXO31, PIWIL3, TRAPPC9, BCL2, MMP16, CAMTA1, SAMSN1, CHFR, THADA, COL18A1, TOX3, RSR1, THRB, DNAH11, ZSCAN5C, CDC42BPA, SLC13A4, B3GALT5, RAG1, SAMM50, CDC42EP3, GRIK2, IGSF11, SNX25, DPYD, UNC13B, MAPK10, NCAM1, KDM4B, GNG12, IL6R, KCNQ5, CDH8, ZBTB20, HEPHL1, SCN11A, ATP10A, SORBS2, SKAP2, HS1BP3, GOT2, KCNJ6, CASP5, KCNK10, BRD4, ZDHHC11B, GPR158, ZNF568, NDRG2, TMEM241, GRIP1, APBA2, TTC3, TLK1, ASTN2, TANC2, KIF4A, CSMD3, DLGAP1, RCAN1, NTN4, JAK2, TM9SF4, BICD1, LRP1B, ZBTB80S, ABCG8, OTUD7A, TPTE2, KALRN, SUMF1, USH2A, NEGR1, FGF12, CACNG2, BTBD9, NFAT5, FLI1, SLC44A5, MEGF11, TRHDE, ZNF536, EPB41L3, LAMA1, PARVB, CDH11, ZBTB7C, CDS2, GRIN2A, MAST4, NRXN1, WDR26, DTWD2, NELL2, ARID1B, IL1RAPL1, WDCP, NIPA2, MAGI1, LAMA3, SLC14A2, ADAMTS |

|  |  |                                                                                                                                                                                                                                                                                                                                                                                                                                                                                                                                                                                                                                                                                                                                                                                                                                                                                                                                                                                                                                                                                                                                                                                                                                                                                                                                                                                                                                                                                                                                                                                                                                                                                                                                                                                                                                                                                                                                                                                                                                                                                                                                                                                                                                                                                                                                                                                                                                                                                                                                                                                                                                                                                                                                                                                                                                                                                                                                                                                                                                                                                                                                                                                                                                                                                                                                                                                                                                                                                                                                                                                                                                                                                                                                                                                                                                                                                                                                                                                                                                                                                                                                                                                                               |
|--|--|---------------------------------------------------------------------------------------------------------------------------------------------------------------------------------------------------------------------------------------------------------------------------------------------------------------------------------------------------------------------------------------------------------------------------------------------------------------------------------------------------------------------------------------------------------------------------------------------------------------------------------------------------------------------------------------------------------------------------------------------------------------------------------------------------------------------------------------------------------------------------------------------------------------------------------------------------------------------------------------------------------------------------------------------------------------------------------------------------------------------------------------------------------------------------------------------------------------------------------------------------------------------------------------------------------------------------------------------------------------------------------------------------------------------------------------------------------------------------------------------------------------------------------------------------------------------------------------------------------------------------------------------------------------------------------------------------------------------------------------------------------------------------------------------------------------------------------------------------------------------------------------------------------------------------------------------------------------------------------------------------------------------------------------------------------------------------------------------------------------------------------------------------------------------------------------------------------------------------------------------------------------------------------------------------------------------------------------------------------------------------------------------------------------------------------------------------------------------------------------------------------------------------------------------------------------------------------------------------------------------------------------------------------------------------------------------------------------------------------------------------------------------------------------------------------------------------------------------------------------------------------------------------------------------------------------------------------------------------------------------------------------------------------------------------------------------------------------------------------------------------------------------------------------------------------------------------------------------------------------------------------------------------------------------------------------------------------------------------------------------------------------------------------------------------------------------------------------------------------------------------------------------------------------------------------------------------------------------------------------------------------------------------------------------------------------------------------------------------------------------------------------------------------------------------------------------------------------------------------------------------------------------------------------------------------------------------------------------------------------------------------------------------------------------------------------------------------------------------------------------------------------------------------------------------------------------------------------|
|  |  | <p>17, GBP4, ADCYAP1R1, ST6GALNAC3, CTDPL1, ADAMTS6, DPP6, PRELI D2, GOLGA8J, GRID1, RPS6KA2, TDP1, SMOC2, ZDHHC17, KCNH1, HLC S, ACSS3, DCDC1, CACNA1C, CCSER2, AMPH, BMF, EXOC4, HEATR5A, W DR70, CKMT1B, PNPLA3, ANO4, BBS9, FAM83B, CTNNA1, MYO9A, NTRK 2, FOXN3, WDFY3, OCLN, AK8, NLK, ITGBL1, THSD7A, ABCA6, NBEA, R ASGEF1B, AFAP1, NCAM2, TIAM2, MYT1L, TMPRSS3, SRGAP2B, IQCJ- SCHIP1, LRRC49, SMARCA4, RNF152, CNTN1, ZNRF3, MEOX2, ENPEP, PLEKHB2, GLIS3, NRG3, PTPRG, MC2R, BTBD11, ELMO1, SLC24A4, CA BIN1, SYNE1, FBXL17, PDZD2, DNAH10, GAS2, GRIK3, CACNB2, PDE1 0A, NUMB, STXBP4, MED15, MTPN, MT1HL1, ESYT2, SOX6, MECOM, SYB U, PDE4DIP, TRPM3, STK32B, VCAN, DNAH8, NHS, CNTNAP5, RGS12, S HANK2, RAPGEF5, UBE2E2, PTGFRN, KCTD8, CHCHD6, UNC5D, EVA1A, ZNF567, NREP, GABRA5, DOK5, AGMO, DLG5, CFDP1, PGM5, SMARCAD1 , ZIM3, ASTN1, AIFM3, ATRNL1, CHRM3, CPE, CALD1, AIG1, ARHGAP2 4, SPRED2, IGHV1OR15-</p> <p>9, SLIT2, PITPNC1, MYLK3, CEP128, ABCA5, ROR1, GLP2R, SLC4A4, ADAMTSL1, KAZN, ZNF675, CSNK2A1, DTNA, AKT3, CBR1, PHKB, KMT2 C, KCNE4, TRIM5, KCNS3, CYP4B1, PSD3, ALPK2, ABCA13, HECW1, RA P1GDS1, AFF3, LCE1F, ERBB4, KANK1, STT3A, GPHN, LPP, ATRX, DMR T1, CHST8, BID, MACF1, MNAT1, TAF4B, RAP1A, TRIO, SLC15A5, CTN NBL1, RAD51B, TRMT61B, PTPRE, MYO3B, DUSP22, CHSY1, MYOM1, PS G8, EXT2, URB1, ZSCAN30, OR4C46, ABL2, PSMA1, MAP3K5, NOS1, AR PP21, ACACA, ABCG1, RGS3, MAML2, SPAG16, EML1, RERG, HTR2C, CC DC141, NEK4, CACNA1E, CTIF, CNTN4, TBC1D5, MUC16, CSTF3, SAMD 13, RNF17, SLC40A1, SLC03A1, GABRR2, PIK3C3, SLC9C1, TRAF3, S ND1, SNAP25-</p> <p>AS1, CHD6, HMCN1, FGD4, ETS2, GOLGA6D, ITGA1, TCF12, ZNF721, H IRA, CORO2B, POC5, ITGA8, GRIK4, RBM19, RUNX1, KIR3DL2, ALDH1 A2, GABRG1, TSHZ2, MAPK9, ESRRG, PTGFR, IGHV1OR21-</p> <p>1, FAR2, FAM171A1, ZNF595, CDH17, SV2B, PEAK1, EYA1, ADAMTS19 , MORC3, ANKS1B, CDH18, P2RX6, HSF2BP, AKAP10, SPOCK3, FRMD6, PLS1, SPON1, ANK2, PLA2G4A, SLC1A2, ZBTB16, ANO2, SUPT3H, SLI T3, GRIN2B, ZNF518A, PHC2, ROBO1, ZNF578, ANKRD30BL, EGFLAM, PAK3, DGKB, GARNL3, DPH6, EBF1, TNKS, KLF12, NDFIP2, AQR, GABR A2, MDM1, OVOL2, CSE1L, PRUNE2, FCHSD2, SGMS1, ITPR2, BRINP1, MLLT3, BCL2L13, IGSF5, TRAPPC10, LEMD3, KHDRBS2, CPQ, RNF138 , CHODL, EHBP1, GABPA, PRICKLE2, PSTPIP2, ITGB3BP, CACNA2D3, DGKK, TMEM67, PRKCE, CNTN3, MGAM, GLIS1, PSG9, ARHGEF11, PRKA A2, PACRG, BBS2, IL1RAPL2, CHCHD3, EDIL3, CDYL2, PTPRN2, MYOM 2, MYO3A, USP31, UBE2R2, HIVEP2, KCNH8, GRIK1, NUBPL, SOX5, KI F6, DSCAM, DGKI, RIN3, ANKFN1, NME7, DNMBP, EFHB, TRAPPC8, KDM 4C, ACSM2A, SDK1, SLC1A1, SLC12A1, GRM5, EPHA6, NTN1, CA10, AR AP2, NR5A2, LDB2, IGF1R, FAR1, SPTB, WDR72, SNX30, NLGN1, DNAH 9, SHISA9, OR9Q1, SHROOM3, JAM2, SNRPN, ALX4, CORIN, MSI2, MON 2, CNTNAP2, MAP2, KCNIP4, CFTR, CAMK1D, FLRT2, MLLT10, NOS1AP , PTPRO, ZDHHC14, MSRA, PCDH9, CD96, RBMS3, MATN2, NHSL1, INSR , COBL, MDN1, CTNNA11, CLEC16A, PHF20L1, ME3, ITGA9, MTRF1, CA TSPER2, CRTAC1, HS6ST3, EGLN3, CUX1, ANK3, CDH12, MORC2, SV2C , GMDS, CNIH3, DOCK3, THSD4, TBCD, GPC6, RELN, RASGRF2, TRPS1 , HS3ST4, MFSD9, ADAMTS5, STK38, ADAMTSL3, SNHG14, AOAH, FBXO3 2, MYO18B, CDH4, TNF, ADCY9, DPP10, OCA2, CELF4, CDKAL1, DAPK1 , VAV3, INPP5A, ZNF600, VRK1, ZNF678, CNTN6, CLIC6, ACSM2B, ZN F420, TTC7B, APP, FBLN5, PUM1, CCDC88A, ARNT2, KCTD1, SPOCK1 , HPSE2, PLCE1, TACC2, ADAM12, PAK1, ATP9B, GNAL, MITF, IGF2BP3 , CACNA2D1, ADCK1, HCN1, PPP1R13B, TOP3A, CHRM5, NSMCE2, ZNF2 08, FRY, CXADR, EPS8, LRFN5, UTRN, GPC5, TENM4, CECR2, PRR16, T SPAN13, GHR, DUX4, RIPK4, RASGRF1, RIN2, PRDM16, FRMD5, RNF21 7, USP7, RBFOX1, MEIS2, KIR2DL4, STARD13, PCDH7, SCP2, KL, LRR C4C, ALCAM, PPP1R9A, PDZRN3, AVEN, TMEM117, ADAMTS16, TASP1 , MICU1, ZZEFL1, LTBP1, SLAMF1, RGL1, BACE2, INO80D, SLC25A21, C LSTN2, MEG8, TTLL11, NEBL, RARB, DIDO1, MYH13, WDR12, TCF4, FR YL, TIAM1, PBX1, FAM126B, PHACTR1, MLIP, SORCS2, PRIM2, SLC39 A12, LIPI, DISC1, OSBPL10, FMN1, RALGPS1, ARHGAP42, CHAF1A, Z FPM2, PIEZO2, SLC35F1, VSTM4, SVEP1, NTM, VTI1A, ASAP1, PCBP3 , FRMPD4, COL23A1, EDAR, EGF, PDGFD, FYN, FAM3B, KCND3, RIMBP2 , PRMT8, IFT43, XRCC4, LRBA, EPHA7, MAP7, FHIT, NSG2, GRIA1, ZN</p> |
|--|--|---------------------------------------------------------------------------------------------------------------------------------------------------------------------------------------------------------------------------------------------------------------------------------------------------------------------------------------------------------------------------------------------------------------------------------------------------------------------------------------------------------------------------------------------------------------------------------------------------------------------------------------------------------------------------------------------------------------------------------------------------------------------------------------------------------------------------------------------------------------------------------------------------------------------------------------------------------------------------------------------------------------------------------------------------------------------------------------------------------------------------------------------------------------------------------------------------------------------------------------------------------------------------------------------------------------------------------------------------------------------------------------------------------------------------------------------------------------------------------------------------------------------------------------------------------------------------------------------------------------------------------------------------------------------------------------------------------------------------------------------------------------------------------------------------------------------------------------------------------------------------------------------------------------------------------------------------------------------------------------------------------------------------------------------------------------------------------------------------------------------------------------------------------------------------------------------------------------------------------------------------------------------------------------------------------------------------------------------------------------------------------------------------------------------------------------------------------------------------------------------------------------------------------------------------------------------------------------------------------------------------------------------------------------------------------------------------------------------------------------------------------------------------------------------------------------------------------------------------------------------------------------------------------------------------------------------------------------------------------------------------------------------------------------------------------------------------------------------------------------------------------------------------------------------------------------------------------------------------------------------------------------------------------------------------------------------------------------------------------------------------------------------------------------------------------------------------------------------------------------------------------------------------------------------------------------------------------------------------------------------------------------------------------------------------------------------------------------------------------------------------------------------------------------------------------------------------------------------------------------------------------------------------------------------------------------------------------------------------------------------------------------------------------------------------------------------------------------------------------------------------------------------------------------------------------------------------------------|

|            |                                   |                       |                                                                                                                                                                                                                                                                                                                                                                                                                                                                                                                                                                                                                                                                                                                                                                                                                                                                                                                                                                                                                                                                                                                                                                                                                                                                                                                                                                                                                                                                                                                                                                                                                                                                                                                                                                                                                                                                                                                                                                                                                                                                                                                                                                                                                                                                                                                                                                                                                                                                                                                                                                                                                                                                                                                                                                                                                                                                                                                                                                                                                                                                                                                                                                                                                                                                                                                                                                                                                                                                                                                                                                                                                                                               |
|------------|-----------------------------------|-----------------------|---------------------------------------------------------------------------------------------------------------------------------------------------------------------------------------------------------------------------------------------------------------------------------------------------------------------------------------------------------------------------------------------------------------------------------------------------------------------------------------------------------------------------------------------------------------------------------------------------------------------------------------------------------------------------------------------------------------------------------------------------------------------------------------------------------------------------------------------------------------------------------------------------------------------------------------------------------------------------------------------------------------------------------------------------------------------------------------------------------------------------------------------------------------------------------------------------------------------------------------------------------------------------------------------------------------------------------------------------------------------------------------------------------------------------------------------------------------------------------------------------------------------------------------------------------------------------------------------------------------------------------------------------------------------------------------------------------------------------------------------------------------------------------------------------------------------------------------------------------------------------------------------------------------------------------------------------------------------------------------------------------------------------------------------------------------------------------------------------------------------------------------------------------------------------------------------------------------------------------------------------------------------------------------------------------------------------------------------------------------------------------------------------------------------------------------------------------------------------------------------------------------------------------------------------------------------------------------------------------------------------------------------------------------------------------------------------------------------------------------------------------------------------------------------------------------------------------------------------------------------------------------------------------------------------------------------------------------------------------------------------------------------------------------------------------------------------------------------------------------------------------------------------------------------------------------------------------------------------------------------------------------------------------------------------------------------------------------------------------------------------------------------------------------------------------------------------------------------------------------------------------------------------------------------------------------------------------------------------------------------------------------------------------------|
|            |                                   |                       | <p>F627, TRABD2B, SPIDR, NAV2, STK3, ANO10, CNOT7, COL19A1, MSR1, PSIP1, AP2B1, USP18, S100B, NET1, TOX, PCDH15, ESR1, ARHGAP12, GABRG3, KCNN3, SGCZ, SEL1L2, PLCXD3, KCNAB1, GRM1, PDE4D, CNTN5, ERC2, PRKACB, GNG2, PDE3A, PCDH11X, RIMS1, POR, L3MBTL4, DOCK4, ATP6V1E1, FRMD4A, MCTP2, CERS3, PIGK, WWOX, PCSK2, HUNK, CNKSR2, FUT8, EPHB1, SSBP2, CREM, LSAMP, CTTNBP2, FHOD3, EFEMP1, ARMC2, TNRC6B, PIGB, AJAP1, IGSF21, MIPEP, ABCC9, SNAP29, GSG1L, HERC1, DOCK1, DIAPH3, PARP15, FAM126A, TRPM7, FLT1, EXT1, EFNA5, NXN, CDC14B, ABCA10, TLN2, C14ORF39, HDAC4, ZNF717, STK36, KLHL1, TRPC5, AMFR, PLCB4, MRM1, ATP9A, FTO, PPFIA2, SH3BP5, AKAP6, ACSBG1, SORCS3, VPS37A, POU6F2, TENM3, LINGO2, OPCML, MARK2, ATF2, TUSC3, PHACTR2, ZNF880, RBBP8, CCDC91, GRID2, ZNF423, LRP2, SEMA6D, ZNF573, C2, RALGPS2, NTF3, FER, SNRK, GLDC, TTC29, CAMK4, GALNT14, CELF2, TP53I11, PDXDC1, NTNG1, DDX10, FBXL7, MAPRE2, ARFGAP3, MICU2, ISX, RAD51AP1, SGC D, TMEM108, RIC8B, GABRB3, TPTE, GRM7, SLC39A8, RAPGEF2, NAV3, MX1, PPA2, IMMP2L, ZNF615, GTF2I, DNAH3, ATXN1, PRKCQ, SSPN, KIRREL3, GABRG2, NUDCD3, CPS1, PRKCH, NRXN3, RHPN2, RABGAP1L, KRT25, DLC1, PNPLA7, NSG1, GABBR2, KCND2, ATP8A2, SLC24A3, UBE3A, ORC4, MPRIP, GRIA4, IDE, CERS6, TPH2, APC, ZBTB25, MACROD2, TTLL5, INO80, TMTC1, MOCS2, AUTS2, TFF1, EPHB2, STON1-GTF2A1L, SCAF4, SYT16, ADARB2, ERC1, ZNF850, PDLIM5, XYLT1, AGO3, C9, TMTC2, MCTP1, RNU1-51P, MOB3B, RYR3, NBAS, PRTG, NBN, ADAMTS18, RGM B, CTNND2, FRMD3, COL22A1, SETD2, PACSIN2, PKP1, DOCK2, NUP214, TRIM23, SDC CAG8, FLVCR1, NRP1, CDH13, MDGA2, RFC3, PHACTR3, ZNF879, RPGRIP1, DACH1, TRDN, SLC2A13, ZNF397, DAB1, RFTN1, SNTG1, ALK, EXOC6B, EVC2, LDLRAD4, SEMA3A, SEMA3E, DNAH6, MGAT5, ATP13A3, CADM2, MALRD1, MYEF2, DCLK1, MAGI3, FAM135B, KIF16B, NRIP1, CDH2, ARID5B, SIPA1L2, CCNG2, RCAN2, LRRC69, TENM2, TANC1, SERPINB7, EVI5, VPS41, SYCP1, ZNF407, ASB3, HDAC9, ELOVL7, PIK3R3, MAP2K6, FSTL4, ARHGAP28, MTOR, STK38L, KSR1, RALGAPA2, RORB, GABRB1, FBLN1, ST8SIA1, BLM, SH3KBP1, FHL2, PSMB2, CADPS, NEU3, NCAPG2, RGS7, KYNU, STK32A, CD2AP, ZFP30, TTC39C, CLVS2, USP25, SLC44A1, SPRED1, AP5M1, SIPA1L3, ADAM10, GALT, MRPS22, DRAM1, TSPAN33, PPP2R2C, KANSL1, LRFN2, FLNB, WDFY4, SCAI, PAPA2, ABCB5, SPECC1, DPY19L2, MTMR10, PTPRT, TRIM9, TRERF1, SLC24A2, GLI3, NTRK3, RXFP1, FBN1, HYDIN, CHKA, RAB31, CTNNA3, VPS13D, ABHD17C, ZNF292, TBX15, RAPGEF4, BMPER, ANKRD31, ZNF521, PDE1A, ATF7IP, HMGA2, MX2, CREB5, THSD7B, NSUN2, DEFA3, PTPRK, SORCS1, TBC1D4, DNM3, SYT1, APIP, SYNDIG1, ASXL3, DPF3, NPHP4, DOCK9, DLG2, PPP1R12B, SACS, PPARA, PLXNA2, SCFD2, PTPRD, RORA, SHISA6, SCARA5, PLCB1, LOXL2, BPTF, PRKG1, RASGRP1, ELAVL4, CDH9, NLRC5, STXBP6, CYP4Z1, DMBT1, MXI1, TTC28, MAGI2, NELL1, STX12, PLCL1, ABI1, GALNTL6, PXDNL, TSHZ3, ASIC2, RALA, DOCK10, GNPTAB, TRPM1, CACNG3, CNTNAP3, FNDC3A, NECAB1, PRKD1, ATP8A1, TNFAIP8, BCL2L1, MICAL3, ADK, HDAC2, RANBP17, ETS1, MRPS27, TNN, ST6GAL2, RYR2, SEMA3D, BANP, TGFA, PRLR, TBX20, PTPRA, FAT3, OR11G2, MTMR2, KCNH5, TMEM163, ATF6, IPO11, IL16, VCL, DEPTOR, BACH1, ATAT1, ROBO2, EWSR1, IFT81, OSCP1, ZMYND11, CDH23, RGS6, SRGAP3, AKAP13, WDR41, NEDD9, MYRIP, SLC39A11, ENPP1, UNC13C, PCP4, RIMS2, SLC5A1, STAC, SCN8A, RAB27A, EYA4, RALGAPA1, L3MBTL3, DLGAP2, POMT2, HIVEP3, CLIP1, SEMA5A, CABLES1, PRDM15, OR4N2, BCL11A, AGAP1, FREM1, DCC, ZNF112, CTNNA2, ATE1, CEP44, PVT1, PARD3B, CHN1, ETV6, VPS13C, KCNJ15, PARD3, NRG1, NPL, CAST, FANK1, ZNF845, SLC25A48, ATP10B, SLC35F4, NPAS3, PRKCA, FMN2, SEMA3C, FANCB, DPY19L1, CSF2RB, PCNT, BCKDHB, PAH, ST18, FRMD4B, OSBPL5, TOP1</p> |
| GO:0018108 | peptidyl-tyrosine phosphorylation | 0.0018051860288991856 | <p>CD44, SEMA4D, SAMSN1, IL6R, JAK2, NTRK2, CNTN1, ROR1, ERBB4, DUSP22, ABL2, PEAK1, PRKCE, GRM5, EPHA6, IGF1R, INSR, DOCK3, RELN, APP, GHR, EGF, PDGFR, FYN, EPHA7, CNOT7, EPHB1, EFEMP1, FLT1, EFNA5, SH3BP5, NTF3, FER, EPHB2, NRP1, ALK, MAP2K6, MTOR, NCAPG2, NTRK3, CHKA, ABI1, HDAC2, TGFA, PRLR, NEDD9, NRG1</p>                                                                                                                                                                                                                                                                                                                                                                                                                                                                                                                                                                                                                                                                                                                                                                                                                                                                                                                                                                                                                                                                                                                                                                                                                                                                                                                                                                                                                                                                                                                                                                                                                                                                                                                                                                                                                                                                                                                                                                                                                                                                                                                                                                                                                                                                                                                                                                                                                                                                                                                                                                                                                                                                                                                                                                                                                                                                                                                                                                                                                                                                                                                                                                                                                                                                                                                                      |

|            |                                                                    |                       |                                                                                                                                                                                                                                                                                                                                                                                                                                                                                                                                                                                                                                                                             |
|------------|--------------------------------------------------------------------|-----------------------|-----------------------------------------------------------------------------------------------------------------------------------------------------------------------------------------------------------------------------------------------------------------------------------------------------------------------------------------------------------------------------------------------------------------------------------------------------------------------------------------------------------------------------------------------------------------------------------------------------------------------------------------------------------------------------|
| GO:1902284 | neuron projection extension involved in neuron projection guidance | 0.0018786473160058205 | SEMA4D,SLIT2,SLIT3,DSCAM,ALCAM,SEMA6D,NRP1,SEMA3A,SEMA3E,SEMA3D,SEMA5A,SEMA3C                                                                                                                                                                                                                                                                                                                                                                                                                                                                                                                                                                                               |
| GO:0048846 | axon extension involved in axon guidance                           | 0.0018786473160058205 | SEMA4D,SLIT2,SLIT3,DSCAM,ALCAM,SEMA6D,NRP1,SEMA3A,SEMA3E,SEMA3D,SEMA5A,SEMA3C                                                                                                                                                                                                                                                                                                                                                                                                                                                                                                                                                                                               |
| GO:0048675 | axon extension                                                     | 0.0019521746025241106 | SEMA4D,SLIT2,MACF1,SLIT3,DSCAM,NTN1,MAP2,CDH4,TNR,ALCAM,DISC1,TRPC5,SEMA6D,AUTS2,NRP1,SEMA3A,SEMA3E,DCLK1,SEMA3D,VCL,SEMA5A,BCL11A,SEMA3C                                                                                                                                                                                                                                                                                                                                                                                                                                                                                                                                   |
| GO:0018212 | peptidyl-tyrosine modification                                     | 0.0021035540860819637 | CD44,SEMA4D,SAMSN1,IL6R,JAK2,NTRK2,CNTN1,ROR1,ERBB4,DISP2,ABL2,PEAK1,PRKCE,GRM5,EPHA6,IGF1R,INSR,DOCK3,RELN,APP,GHR,EGF,PDGFR,FYN,EPHA7,CNOT7,EPHB1,EFEMP1,FLT1,EFNA5,SH3BP5,NTF3,FER,EPHB2,NRP1,ALK,MAP2K6,MTOR,NCAPG2,NTRK3,CHKA,ABI1,HDAC2,TGFA,PRLR,NEDD9,NRG1                                                                                                                                                                                                                                                                                                                                                                                                          |
| GO:0097120 | receptor localization to synapse                                   | 0.0021173751785926597 | GRIP1,CACNG2,NRXN1,GPHN,RAP1A,ANKS1B,NLGN1,GPC6,RELN,NSG1,ADAM10,DLG2,SHISA6,CACNG3,CEP112                                                                                                                                                                                                                                                                                                                                                                                                                                                                                                                                                                                  |
| GO:0048646 | anatomical structure formation involved in morphogenesis           | 0.0021552381345268045 | PRKCB,COL18A1,MEGF11,EPB41L3,NRXN1,LAMA3,SMOC2,KCNH1,EXOC4,THSD7A,CNTN1,MEOX2,ENPEP,NRG3,SLC24A4,MTPN,PTGFRN,PGM5,CALD1,ARHGAP24,SLIT2,MYLK3,AKT3,CRB1,EXT2,NOS1,SLC40A1,ETS2,ITGA8,RUNX1,ALDH1A2,EYA1,ANK2,ROBO1,OVOL2,GABPA,MYOM2,DSCAM,KDM4C,SDK1,SLC1A1,WDR72,SHROOM3,JAM2,CFTR,COBL,RELN,ADAMTS5,VAV3,ADAM12,TENM4,CECR2,STARD13,NEBL,SLC39A12,FMN1,VSTM4,EDAR,EGF,STK3,PRKACB,EPHB1,FHOD3,HERC1,FLT1,EXT1,ATF2,GRID2,LRP2,GTTF2I,NRXN3,DLC1,ATP8A2,EPHB2,COL22A1,SETD2,SDCCAG8,NRP1,CDH13,SEMA3E,KIF16B,TANC1,HDAC9,PIK3R3,FHL2,SPRED1,GLI3,BMPER,HMGA2,PPARA,PLXNA2,RORA,LOXL2,ABI1,RALA,PRKD1,HDAC2,ETS1,TNN,TGFA,TBX20,FAT3,MTMR2,ROBO2,AKAP13,SEMA5A,PRKCA,SEMA3C |
| GO:1990138 | neuron projection                                                  | 0.0023743154085618026 | SEMA4D,SLIT2,MACF1,SLIT3,DSCAM,NTN1,MAP2,CDH4,TNR,ALCAM,DISC1,RIMS1,TRPC5,SEMA6D,TMEM108,AUTS2,NRP1,SEMA3A,SEMA3E,DCLK1,SYT1,TNN,SEMA3D,VCL,RIMS2,SEMA5A,BCL11A,SEMA3C                                                                                                                                                                                                                                                                                                                                                                                                                                                                                                      |



|            |                                                        |                       |                                                                                                                                                                                                                                                                                                                                                                                                                                                                  |
|------------|--------------------------------------------------------|-----------------------|------------------------------------------------------------------------------------------------------------------------------------------------------------------------------------------------------------------------------------------------------------------------------------------------------------------------------------------------------------------------------------------------------------------------------------------------------------------|
|            | ction<br>exten<br>sion                                 |                       |                                                                                                                                                                                                                                                                                                                                                                                                                                                                  |
| GO:0061387 | regulation of extent of cell growth                    | 0.003074144639618054  | SEMA4D,MACF1,DSCAM,NTN1,MAP2,CDH4,TNR,DISC1,EPHA7,EFNA5,TRPC5,SEMA6D,NRP1,SEMA3A,SEMA3E,FSTL4,SEMA3D,SEMA5A,BCL11A,DCC,SEMA3C                                                                                                                                                                                                                                                                                                                                    |
| GO:0051129 | negative regulation of cellular component organization | 0.0030784880826445183 | SCAF8,SEMA4D,DNAJC15,CD38,NRXN1,RPS6KA2,IQCJ-SCHIP1,PTPRG,MTPN,ARHGAP24,SLIT2,KANK1,ATRX,DMRT1,MNAT1,DUSP22,CORO2B,GRIN2B,TNKS,MDM1,TMEM67,RIN3,NTN1,SPTB,NLGN1,MAP2,PTPRO,CLEC16A,TBCD,TNR,SPOCK1,ADCK1,EPS8,FYN,EPHA7,FHOD3,TRPC5,SEMA6D,RAPGEF2,NAV3,RHPN2,DLC1,UBE3A,APC,EPHB2,SCAF4,MCTP1,NBN,PACSIN2,NRP1,DAB1,LDLRAD4,SEMA3A,SEMA3E,FSTL4,ARHGAP28,NEU3,TBC1D4,DNM3,SACS,PRKD1,BCL2L1,HDAC2,SEMA3D,TBX20,FAT3,MTMR2,ROBO2,SEMA5A,BCL11A,DCC,CTNNA2,SEMA3C |
| GO:0031644 | regulation of nervous system process                   | 0.003110215284024939  | IGSF11,UNC13B,SCN11A,DLGAP1,FGF12,GRIN2A,NRXN1,HTR2C,GRIN2B,NLGN1,SHISA9,JAM2,RELN,TNR,CELF4,APP,TENM4,GRM1,RIMS1,TMEM108,SHISA6,MTMR2,RIMS2,DLGAP2,PARD3                                                                                                                                                                                                                                                                                                        |
| GO:0030900 | forebrain development                                  | 0.003142491978402117  | SLC8A1,KCNC1,TRAPPC9,NTRK2,NRG3,NUMB,SLIT2,ERBB4,ATRX,CCDC141,ALDH1A2,SLC1A2,ROBO1,BBS2,IGF1R,CNTNAP2,RELN,TNR,APP,TACC2,RARB,PHACTR1,DISC1,FYN,TOX,EXT1,LRP2,TMEM108,RAPGEF2,KIRREL3,DLC1,EPHB2,SETD2,NRP1,DAB1,ALK,SEMA3A,SEMA3E,DCLK1,CDH2,GLI3,PLCB1,PRKG1,ELAVL4,ATAT1,ROBO2,SEMA5A,NRG1                                                                                                                                                                    |
| GO:0071417 | cellular response to organonitrogen compound           | 0.0031716483837773155 | PRKCB,SLC8A1,JAK2,ARID1B,PNPLA3,CTNNA1,NTRK2,STXBP4,CHRM3,SLIT2,GLP2R,RAP1GDS1,KANK1,RAP1A,PTPRE,HTR2C,SLC1A2,ITPR2,GABPA,SLC1A1,GRM5,IGF1R,CFTR,INSR,APP,GNAL,CACNA2D1,HCN1,CHRM5,GHR,KL,PDGFD,FYN,NSG2,SPIDR,PDE4D,GNG2,PDE3A,POR,AKAP6,ATF2,FER,GABRB3,RAPGEF2,PRKCQ,GABRG2,CPS1,NSG1,IDE,APC,EPHB2,RYR3,ALK,HDAC9,PIK3R3,MTOR,GABRB1,BLM,FBN1,RAB31,TBC1D4,PLCB1,BCL2L1,HDAC2,RYR2,PTPRA,ENPP1,BCL11A                                                        |
| GO:1905114 | cell surface receptor signaling pathway                | 0.0032521953951728817 | ANKRD6,GRIK2,IGSF11,UNC13B,NDRG2,GRIN2A,NRXN1,NLK,SMAACA4,ZNRF3,CPE,ROR1,CSNK2A1,ALPK2,HECW1,KANK1,MACF1,P2RX6,GRIN2B,TNKS,MLLT3,RNF138,PRICKLE2,PRKAA2,DGKI,NLGN1,PTPRO,RBMS3,GPC6,RELN,CELF4,APP,CCDC88A,MITF,GPC5,TIAM1,DISC1,EGF,TRABD2B,STK3,RIMS1,WWOX,EXT1,NXN,AMFR,MARK2,GRID2,ZNF423,TMEM108,APC,CTNND2,CDH2,GLI3,NPH4,SHISA6,MAGI2,TNN,MTMR2,RIMS2,SEMA5A,PRDM15                                                                                       |

|            |                                              |                       |                                                                                                                                                                                                                                                                                                                                                                                                                                                                                                                                                                                                                                                                                                                            |
|------------|----------------------------------------------|-----------------------|----------------------------------------------------------------------------------------------------------------------------------------------------------------------------------------------------------------------------------------------------------------------------------------------------------------------------------------------------------------------------------------------------------------------------------------------------------------------------------------------------------------------------------------------------------------------------------------------------------------------------------------------------------------------------------------------------------------------------|
|            | involved in cell-cell signaling              |                       |                                                                                                                                                                                                                                                                                                                                                                                                                                                                                                                                                                                                                                                                                                                            |
| GO:0051094 | positive regulation of developmental process | 0.0038095220734387677 | ZHX3,SEMA4D,PRKCB,SLC8A1,FBXO31,BCL2,RAG1,IL6R,GRIP1,JAK2,KALRN,LAMA1,ZBTB7C,NRXN1,ARID1B,IL1RAPL1,SMOC2,NTRK2,TIAM2,SMARCA4,NUMB,SOX6,DLG5,SLIT2,MYLK3,AKT3,ERBB4,DMRT1,MACF1,RAP1A,MAP3K5,HTR2C,TCF12,RBM19,RUNX1,MAPK9,PLS1,ZBTB16,ROBO1,PAK3,OVOL2,BRINP1,CHODL,BBS2,SOX5,DSCAM,GRM5,NTN1,IGF1R,NLGN1,CFTR,FLRT2,INSR,COBL,CUX1,RELN,CDH4,ADAM12,TENM4,GHR,RIN2,KL,CLSTN2,TCF4,TIAM1,SLC39A12,DISC1,ZFPM2,EGF,STK3,MSR1,TOX,PDE3A,RIMS1,POR,EPHB1,DOCK1,FLT1,EFNA5,TRPC5,AKAP6,LINGO2,GRIID2,LRP2,RAPGEF2,PRKCH,ATP8A2,EPHB2,NRP1,DAB1,ALK,MTOR,GLI3,BMPER,HMGA2,SYT1,SYNDIG1,DPF3,PLXNA2,PTPRD,PLCB1,LOXL2,RASGRP1,ELAVL4,NELL1,ASIC2,RALA,PRKD1,HDAC2,ETS1,TNN,TBX20,ROBO2,NEDD9,PCP4,RIMS2,SEMA5A,BCL11A,NRG1,PRKCA |
| GO:0007043 | cell-cell junction assembly                  | 0.004577407732796014  | CDH8,EPB41L3,CDH11,CTNNA1,OCLN,DLG5,CDH18,ANK2,CNTNAP2,PTPRO,CDH12,TBCD,TLN2,FER,PRKCH,APC,EPHB2,CTNND2,PKP1,CDH2,NPHP4,CDH9,VCL,PARD3,PRKCA                                                                                                                                                                                                                                                                                                                                                                                                                                                                                                                                                                               |
| GO:0060996 | dendritic spine development                  | 0.00462495984923291   | TANC2,KALRN,DLG5,PAK3,SDK1,NLGN1,RELN,DISC1,ASAP1,EPHB1,PPFIA2,UBE3A,EPHB2,PDLIM5,CTNND2,FSTL4,DNM3,DOCK10,HDAC2                                                                                                                                                                                                                                                                                                                                                                                                                                                                                                                                                                                                           |
| GO:0040008 | regulation of growth                         | 0.004794842303496823  | SEMA4D,TEAD1,CD38,BCL2,IGSF11,EPB41L3,CTDP1,SMARCA4,NRG3,MTPN,SLIT2,CSNK2A1,ERBB4,MACF1,RERG,RUNX1,PLS1,SLIT3,ARHGEF11,BBS2,DSCAM,NTN1,MAP2,INSR,CDH4,TNR,APP,FBIN5,SPOCK1,PLCE1,CXADR,GHR,DISC1,ZFPM2,EPHA7,STK3,NET1,RIMS1,EFNA5,TRPC5,FTO,AKAP6,SEMA6D,PRKCQ,ATP8A2,INO80,FLVCR1,NRP1,RFTN1,SEMA3A,SEMA3E,FSTL4,MTOR,ADAM10,PAPPA2,HMGA2,SYT1,PPARA,PLCB1,BCL2L1,SEMA3D,TBX20,NEDD9,ENPP1,RIMS2,SEMA5A,BCL11A,DCC,NRG1,SEMA3C                                                                                                                                                                                                                                                                                           |
| GO:0007423 | sensory organ development                    | 0.004795384813977243  | BCL2,THRB,USH2A,MEGF11,LAMA1,WDCP,CACNA1C,NTRK2,SMARCA4,NHS,GABRA5,SPRED2,ROR1,CRB1,MYO3B,ITGA8,ALDH1A2,EYA1,PLS1,MDM1,MYO3A,DSCAM,SDK1,SLC1A1,NTN1,CELF4,MITF,HCN1,CECR2,MEIS2,RARB,PBX1,VSTM4,PCDH15,LRIG1,EPHB1,EFEMP1,FLT1,TENM3,ATP8A2,TTL5,EPHB2,ADAMTS18,NRP1,RPGRIP1,DCLK1,RORB,TTC39C,SPRED1,SIPA1L3,ADAM10,ABCB5,GLI3,NTRK3,FBN1,BMPER,SCAPER,NPHP4,MYH15,HDAC2,FAT3,ATF6,CDH23,EYA4                                                                                                                                                                                                                                                                                                                             |
| GO:0031290 | retinal ganglion cell axon guidance          | 0.005065093549011559  | SLIT2,PTPRO,ALCAM,EPHA7,EPHB1,EFNA5,EPHB2,NRP1,ROBO2                                                                                                                                                                                                                                                                                                                                                                                                                                                                                                                                                                                                                                                                       |
| GO:0007158 | neuron cell-                                 | 0.0053058010384715365 | ASTN2,NRXN1,NCAM2,ASTN1,CNTN4,NLGN1,TNR,NRXN3                                                                                                                                                                                                                                                                                                                                                                                                                                                                                                                                                                                                                                                                              |

|                |                                                                                         |                           |                                                                                                                                                                                                                                                                                                                                                                                                                                                                                                                                                                                                                                                                                                                                                                                                       |
|----------------|-----------------------------------------------------------------------------------------|---------------------------|-------------------------------------------------------------------------------------------------------------------------------------------------------------------------------------------------------------------------------------------------------------------------------------------------------------------------------------------------------------------------------------------------------------------------------------------------------------------------------------------------------------------------------------------------------------------------------------------------------------------------------------------------------------------------------------------------------------------------------------------------------------------------------------------------------|
|                | cell<br>adhes<br>ion                                                                    |                           |                                                                                                                                                                                                                                                                                                                                                                                                                                                                                                                                                                                                                                                                                                                                                                                                       |
| GO:00<br>50773 | regul<br>ation<br>of<br>dendr<br>ite<br>devel<br>opmen<br>t                             | 0.005656819<br>8875852705 | SEMA4D,FBXO31,CSMD3,KALRN,IL1RAPL1,HECW1,PAK3,CAMK1D,<br>COBL,CUX1,RELN,TRPC5,RAPGEF2,EPHB2,ALK,PTPRD,ELAVL4,F<br>AT3,BCL11A,DCC                                                                                                                                                                                                                                                                                                                                                                                                                                                                                                                                                                                                                                                                      |
| GO:00<br>07214 | gamma<br>-<br>amino<br>butyr<br>ic<br>acid<br>signa<br>ling<br>pathw<br>ay              | 0.005886223<br>800356885  | GABRA5,GABRR2,GABRG1,GABRA2,GABRG3,GABRB3,GABRG2,GABB<br>R2,GABRB1,PLCL1                                                                                                                                                                                                                                                                                                                                                                                                                                                                                                                                                                                                                                                                                                                              |
| GO:00<br>10469 | regul<br>ation<br>of<br>signa<br>ling<br>recep<br>tor<br>activ<br>ity                   | 0.006010968<br>8166137334 | DLGAP1,JAK2,BICD1,CACNG2,NRXN1,SLC24A4,NLGN1,SHISA9,C<br>NIH3,RELN,RASGRF2,DAPK1,APP,RASGRF1,EGF,PDE4D,GSG1L,E<br>PHB2,NRP1,NCAPG2,PPARA,SHISA6,CACNG3,HDAC2,TGFA,DLGAP<br>2                                                                                                                                                                                                                                                                                                                                                                                                                                                                                                                                                                                                                          |
| GO:00<br>44089 | posit<br>ive<br>regul<br>ation<br>of<br>cellu<br>lar<br>compo<br>nent<br>bioge<br>nesis | 0.006185105<br>945627232  | SEMA4D,CDC42EP3,UNC13B,NRXN1,IL1RAPL1,BMF,NTRK2,OCN,<br>PDE4DIP,DLG5,BID,MAPK9,CDH17,FCHSD2,PRKCE,LDB2,SNX30,<br>NLGN1,CNTNAP2,FLRT2,COBL,MORC2,CCDC88A,PLCE1,PAK1,EP<br>S8,CLSTN2,FMN1,ASAP1,TRABD2B,SPIDR,ESR1,EPHB1,EFNA5,HD<br>AC4,LINGO2,GRID2,FER,NAV3,APC,AUTS2,EPHB2,NRP1,TENM2,<br>MTOR,ATF7IP,DNM3,SYNDIG1,NPHP4,PTPRD,ASIC2,RALA,ATAT1<br>,CLIP1,NRG1,PRKCA                                                                                                                                                                                                                                                                                                                                                                                                                                |
| GO:00<br>10648 | negat<br>ive<br>regul<br>ation<br>of<br>cell<br>commu<br>nicat<br>ion                   | 0.006605001<br>455828056  | CD44,PTPRR,TAOK3,PRKCB,ANKRD6,CD38,BCL2,GRIK2,SNX25,B<br>RD4,NDRG2,RCAN1,BICD1,OTUD7A,KALRN,ZNF536,CTNNA1,NLK,<br>SMARCA4,RNF152,ZNRF3,SLC24A4,GRIK3,PDE10A,MECOM,RGS12<br>,SHANK2,DLG5,ARHGAP24,SPRED2,SLIT2,ZNF675,CSNK2A1,ALP<br>K2,HECW1,KANK1,BID,RAP1A,PTPRE,DUSP22,ABL2,RGS3,ITGA1<br>,EYA1,SLIT3,ROBO1,OVOL2,MLLT3,LEMD3,PRKAA2,DGKI,GRM5,<br>IGF1R,PTPRO,RBMS3,STK38,TNR,CELF4,HCN1,PRDM16,LTBP1,S<br>LAMF1,SORCS2,ARHGAP42,GRIA1,TRABD2B,STK3,CNOT7,USP18,<br>ESR1,ARHGAP12,PDE4D,PRKACB,PDE3A,WWOX,NXN,AMFR,SORCS3<br>,GRID2,LRP2,PRKCQ,DLC1,APC,EPHB2,NRP1,DAB1,LDLRAD4,CD<br>H2,FSTL4,MTOR,FBLN1,FHL2,RGS7,CD2AP,SPRED1,SCAI,PTPRT<br>,SLC24A2,GLI3,FBN1,BMPER,NPHP4,PPARA,PTPRD,RORA,SHISA<br>6,NLRC5,MAGI2,BCL2L1,HDAC2,TNN,TBX20,MTMR2,DEPTOR,ZMY<br>ND11,RGS6,ENPP1,EYA4,PRDM15,NRG1 |
| GO:00<br>48639 | posit<br>ive<br>regul                                                                   | 0.006768453<br>578365107  | SEMA4D,BCL2,ERBB4,MACF1,PLS1,BBS2,DSCAM,NTN1,INSR,CDH<br>4,GHR,DISC1,ZFPM2,RIMS1,EFNA5,TRPC5,AKAP6,ATP8A2,NRP1<br>,SYT1,PLCB1,TBX20,RIMS2,SEMA5A,BCL11A,NRG1                                                                                                                                                                                                                                                                                                                                                                                                                                                                                                                                                                                                                                          |

|            |                                    |                       |                                                                                                                                                                                                                                                                                                                                                                                                                                                                                                                                                                                                                                                               |
|------------|------------------------------------|-----------------------|---------------------------------------------------------------------------------------------------------------------------------------------------------------------------------------------------------------------------------------------------------------------------------------------------------------------------------------------------------------------------------------------------------------------------------------------------------------------------------------------------------------------------------------------------------------------------------------------------------------------------------------------------------------|
|            | ation of developmental growth      |                       |                                                                                                                                                                                                                                                                                                                                                                                                                                                                                                                                                                                                                                                               |
| GO:0001558 | regulation of cell growth          | 0.006928586277388833  | SEMA4D,TEAD1,CD38,BCL2,EPB41L3,CTDP1,SMARCA4,NRG3,MTPN,SLIT2,CSNK2A1,MACF1,RERG,SLIT3,ARHGEF11,DSCAM,NTN1,MAP2,CDH4,TNR,FBLN5,SPOCK1,PLCE1,DISC1,EPHA7,NET1,RIMS1,EFNA5,TRPC5,AKAP6,SEMA6D,PRKCQ,INO80,NRP1,SEMA3A,SEMA3E,FSTL4,MTOR,ADAM10,PAPPA2,SYT1,PPARA,SEMA3D,ENPP1,RIMS2,SEMA5A,BCL11A,DCC,NRG1,SEMA3C                                                                                                                                                                                                                                                                                                                                                |
| GO:0014706 | striated muscle tissue development | 0.007087327900535896  | SLC8A1,SORBS2,CTDP1,MTPN,SOX6,PGM5,MYLK3,ALPK2,ERBB4,RUNX1,ALDH1A2,EYA1,MYO18B,CXADR,TENM4,NEBL,RARB,ZFPM2,SGCZ,FHOD3,AKAP6,LRP2,SGCD,PDLIM5,MTOR,FHL2,SGCG,PPARA,RYR2,TBX20,AKAP13,NRG1,SEMA3C                                                                                                                                                                                                                                                                                                                                                                                                                                                               |
| GO:0051336 | regulation of hydrolase activity   | 0.007243706156187095  | CD44,SEMA4D,A2M,GPR55,RAG1,RCAN1,JAK2,BICD1,KALRN,GRI N2A,ADCYAP1R1,MYO9A,NTRK2,RASGEF1B,TIAM2,TBC1D22A,RAPGEF5,ARHGAP24,CSNK2A1,RAP1GDS1,BID,RAP1A,ABL2,MAP3K5,NOS1,TBC1D5,FGD4,ITGA1,SPOCK3,GRIN2B,ROBO1,GARNL3,BCL2L13,DGKI,SLC1A1,ARAP2,EGLN3,RASGRF2,DAPK1,VAV3,APP,SPOCK1,RASGRF1,RGL1,TIAM1,ASAP2,RALGPS1,ARHGAP42,ASAP1,FYN,EPHA7,NET1,ESR1,ARHGAP12,PDE3A,POR,FLT1,EFNA5,RALGPS2,NTF3,MAPRE2,RAPGEF2,RABGAP1L,DLC1,MGAT5,SIPA1L2,SERPINB7,EVI5,HDAC9,MTOR,RALGAPA2,FBLN1,SGSM1,RGS7,SIPA1L3,NTRK3,RAPGEF4,TBC1D4,DOCK9,PLXNA2,PRKG1,RASGRP1,MAGI2,DOCK10,PRKD1,TNFAIP8,RGS6,WDR41,NEDD9,RALGAPA1,CHN1,CAST,TBC1D9,ST18                               |
| GO:0090630 | activation of GTPase activity      | 0.007595968484409961  | TIAM2,TBC1D22A,ARHGAP24,TBC1D5,GARNL3,RASGRF1,TIAM1,ARHGAP42,NTF3,RABGAP1L,SIPA1L2,EVI5,RALGAPA2,SGSM1,SIPA1L3,NTRK3,TBC1D4,RASGRP1,NEDD9,RALGAPA1,TBC1D9                                                                                                                                                                                                                                                                                                                                                                                                                                                                                                     |
| GO:0045216 | cell-cell junction organization    | 0.0076943049692955266 | CDH8,EPB41L3,CDH11,CTNNA1,OCLN,NUMB,DLG5,CDH18,ANK2,CNTNAP2,PTPRO,CDH12,TBCD,CXADR,SVEP1,EXT1,TLN2,FER,PRKCH,APC,EPHB2,CTNND2,PKP1,CDH2,ADAM10,NPHP4,CDH9,VCL,PARAD3,PRKCA                                                                                                                                                                                                                                                                                                                                                                                                                                                                                    |
| GO:0023057 | negative regulation of signaling   | 0.007905638442819884  | CD44,PTPRR,TAOK3,PRKCB,ANKRD6,CD38,BCL2,GRIK2,SNX25,BRD4,NDRG2,RCAN1,BICD1,OTUD7A,KALRN,ZNF536,CTNNA1,NLK,SMARCA4,RNF152,ZNRF3,SLC24A4,GRIK3,PDE10A,MECOM,RGS12,SHANK2,DLG5,ARHGAP24,SPRED2,SLIT2,ZNF675,CSNK2A1,ALPK2,HECW1,KANK1,BID,RAP1A,PTPRE,DUSP22,ABL2,RGS3,ITGA1,EYA1,SLIT3,ROBO1,OVOL2,MLLT3,LEMD3,PRKAA2,DGKI,GRM5,IGF1R,PTPRO,RBMS3,STK38,TNR,CELF4,HCN1,PRDM16,LTBP1,S LAMF1,SORCS2,ARHGAP42,GRIA1,TRABD2B,STK3,CNOT7,USP18,ESR1,ARHGAP12,PDE4D,PRKACB,PDE3A,WWOX,NXN,AMFR,SORCS3,GRID2,LRP2,PRKCQ,DLC1,APC,EPHB2,NRP1,DAB1,LDLRAD4,CDH2,FSTL4,MTOR,FBLN1,FHL2,RGS7,CD2AP,SPRED1,SCAI,PTPRT,SLC24A2,GLI3,FBN1,BMPER,NPHP4,PPARA,PTPRD,RORA,SHISA |

|            |                                               |                      |                                                                                                                                                                                                                                                                                                                                                                                                                             |
|------------|-----------------------------------------------|----------------------|-----------------------------------------------------------------------------------------------------------------------------------------------------------------------------------------------------------------------------------------------------------------------------------------------------------------------------------------------------------------------------------------------------------------------------|
|            |                                               |                      | 6,NLRC5,MAGI2,BCL2L1,HDAC2,TNN,TBX20,MTMR2,DEPTOR,ZMYND11,RGS6,ENPP1,EYA4,PRDM15,NRG1                                                                                                                                                                                                                                                                                                                                       |
| GO:1901699 | cellular response to nitrogen compound        | 0.008130749789162919 | PRKCB,SLC8A1,JAK2,ARID1B,PNPLA3,CTNNA1,NTRK2,STXBP4,CHRM3,SLIT2,GLP2R,RAP1GDS1,KANK1,ATRX,RAP1A,PTPRE,MAP3K5,HTR2C,SLC1A2,ITPR2,GABPA,SLC1A1,GRM5,IGF1R,CFTR,INSR,APP,GNAL,CACNA2D1,HCN1,CHRM5,GHR,KL,PDGFD,FYN,NSG2,GRIA1,SPIDR,PDE4D,GNG2,PDE3A,POR,AKAP6,ATF2,FER,GABRB3,RAPGEF2,PRKCQ,GABRG2,CPS1,NSG1,IDE,APC,EPHB2,RYR3,ALK,HDAC9,PIK3R3,MTOR,GABRB1,BLM,FBN1,RAB31,TBC1D4,PLCB1,BCL2L1,HDAC2,RYR2,PTPRA,ENPP1,BCL11A |
| GO:0071805 | potassium ion transmembrane transport         | 0.008904055858258325 | KCNMA1,SLC12A8,KCNC1,KCNQ5,KCNJ6,KCNK10,DPP6,KCNH1,SLC24A4,KCNE4,KCNS3,SLC9C1,ANK2,KCNH8,SLC12A1,KCNIP4,NOSLAP,ANK3,DPP10,HCN1,KCND3,KCNN3,KCNAB1,ABCC9,AKAP6,KCND2,SLC24A3,RGS7,SLC24A2,KCNH5,KCNJ15                                                                                                                                                                                                                       |
| GO:1901890 | positive regulation of cell junction assembly | 0.00896039507637462  | SEMA4D,NRXN1,IL1RAPL1,NTRK2,DLG5,NLGN1,CNTNAP2,FLRT2,CLSTN2,FMN1,EPHB1,EFNA5,LINGO2,GRID2,EPHB2,NRP1,SYNDIG1,NPHP4,PTPRD,ASIC2                                                                                                                                                                                                                                                                                              |
| GO:0010720 | positive regulation of cell development       | 0.009674577755211168 | SEMA4D,FBXO31,BCL2,KALRN,IL1RAPL1,NTRK2,TIAM2,NUMB,SLIT2,MACF1,ROBO1,PAK3,CHODL,DSCAM,GRM5,NTN1,CUX1,RELN,CDH4,TENM4,TIAM1,DISC1,PDE3A,DOCK1,EFNA5,TRPC5,LRP2,PRKCH,EPHB2,NRP1,MTOR,GLI3,PLXNA2,PTPRD,HDAC2,ROBO2,NEDD9,SEMA5A,BCL11A                                                                                                                                                                                       |
| GO:0048640 | negative regulation of developmental growth   | 0.010400333793186617 | SEMA4D,CTDP1,BBS2,NTN1,MAP2,TNR,CXADR,EPHA7,STK3,SEMA6D,NRP1,SEMA3A,SEMA3E,FSTL4,PPARA,SEMA3D,SEMA5A,BCL11A,DCC,SEMA3C                                                                                                                                                                                                                                                                                                      |
| GO:0055013 | cardiac muscle cell development               | 0.011950251641009935 | SLC8A1,SORBS2,CTDP1,MYLK3,ALPK2,MYO18B,CXADR,NEBL,FHOD3,AKAP6,SGCD,PDLIM5,MTOR,FHL2,PPARA,AKAP13                                                                                                                                                                                                                                                                                                                            |

|            |                                                                |                      |                                                                                                                                                                                                                                                                                                                                                    |
|------------|----------------------------------------------------------------|----------------------|----------------------------------------------------------------------------------------------------------------------------------------------------------------------------------------------------------------------------------------------------------------------------------------------------------------------------------------------------|
| GO:0046545 | development of primary female sexual characteristics           | 0.012046668434437996 | A2M,BCL2,ADCYAP1R1,CTNNA1,GAS2,SLIT2,SLIT3,INSR,ZFPM2,ESR1,ACSBG1,IMMP2L,UBE3A,DACH1,NRIP1,ARID5B,CSMD1,SCAPER,BCL2L1,ROBO2                                                                                                                                                                                                                        |
| GO:0099072 | regulation of postsynaptic membrane neurotransmitter receptors | 0.012287951770181004 | GRIP1,CACNG2,NUMB,GPHN,RAP1A,GPC6,EPS8,AP2B1,GSG1L,NSG1,ADAM10,DNM3,SHISA6,CACNG3,NRG1                                                                                                                                                                                                                                                             |
| GO:0060047 | heart contraction                                              | 0.012337570873167078 | SLC8A1,THRB,JAK2,FGF12,RPS6KA2,CACNA1C,CACNB2,KCNE4,EXT2,NOS1,ANK2,SLC1A1,CORIN,NOS1AP,RNLS,CACNA2D1,HCN1,CXADR,KCND3,SGCZ,PDE4D,ABCC9,EXT1,HDAC4,CELF2,SGCD,TRDN,ASB3,MAP2K6,MTOR,SGCG,CTNNA3,RYR2                                                                                                                                                |
| GO:0002009 | morphogenesis of an epithelium                                 | 0.013161224004967062 | CD44,ANKRD6,BCL2,ASTN2,NTN4,LAMA1,WPCP,LAMA3,MYO9A,ZNRF3,DLG5,ARHGAP24,SLIT2,ROR1,ERBB4,ALDH1A2,EYA1,OVOL2,MLLT3,PRICKLE2,NTN1,SHROOM3,COBL,GPC6,PAK1,CECR2,RIPK4,STARD13,ADAMTS16,TIAM1,PBX1,FMN1,EGF,EPHA7,STK3,PCDH15,ESR1,ARHGAP12,PRKACB,GREB1L,AJAP1,EXT1,LRP2,KRT25,DLC1,SETD2,NRP1,SEMA3E,MTOR,CSMD1,GLI3,MAGI2,RALA,RYR2,TBX20,VCL,SEMA3C |
| GO:0051961 | negative regulation of nervous system development              | 0.013518450148743198 | SEMA4D,CTNNA1,BRINP1,NTN1,MAP2,TNR,EPHA7,TRPC5,SEMA6D,RAPGEF2,EPHB2,PRTG,NRP1,DAB1,SEMA3A,SEMA3E,FSTL4,NTRK3,SEMA3D,ROBO2,SEMA5A,BCL11A,DCC,SEMA3C                                                                                                                                                                                                 |
| GO:0098815 | modulation of excitatory postsynaptic transmission             | 0.014611917251826863 | IGSF11,GRIN2A,NRXN1,GRIN2B,NLGN1,RELN,CELF4,APP,RIMS1,TMEM108,MTMR2,RIMS2                                                                                                                                                                                                                                                                          |

|            |                                       |                      |                                                                                                                                                                                                                                                                                                                                                                                                                                                                                                                                                                                                                                                                                                                                                                                                                                                                                                                                                                                                                                                                                                                                                                                                                                                                                                                                                                                                                                                                                                                                                                                                                                                                                                                        |
|------------|---------------------------------------|----------------------|------------------------------------------------------------------------------------------------------------------------------------------------------------------------------------------------------------------------------------------------------------------------------------------------------------------------------------------------------------------------------------------------------------------------------------------------------------------------------------------------------------------------------------------------------------------------------------------------------------------------------------------------------------------------------------------------------------------------------------------------------------------------------------------------------------------------------------------------------------------------------------------------------------------------------------------------------------------------------------------------------------------------------------------------------------------------------------------------------------------------------------------------------------------------------------------------------------------------------------------------------------------------------------------------------------------------------------------------------------------------------------------------------------------------------------------------------------------------------------------------------------------------------------------------------------------------------------------------------------------------------------------------------------------------------------------------------------------------|
|            | ynaptic potential                     |                      |                                                                                                                                                                                                                                                                                                                                                                                                                                                                                                                                                                                                                                                                                                                                                                                                                                                                                                                                                                                                                                                                                                                                                                                                                                                                                                                                                                                                                                                                                                                                                                                                                                                                                                                        |
| GO:0032535 | regulation of cellular component size | 0.01515371281368811  | KCNMA1,SEMA4D,SLC12A8,CDC42EP3,MTPN,SLIT2,AKT3,KANK1,MACF1,PLS1,PAK3,FCHSD2,PRKCE,DSCAM,RIN3,SLC12A1,NTN1,SPTB,MAP2,CDH4,TNR,VAV3,EPS8,PRR16,DISC1,FMN1,EPHA7,FHOD3,EFNA5,TRPC5,SEMA6D,FER,NRP1,SEMA3A,SEMA3E,FSTL4,ARHGAP28,MTOR,SEMA3D,DEPTOR,SEMA5A,BCL11A,DCC,SEMA3C                                                                                                                                                                                                                                                                                                                                                                                                                                                                                                                                                                                                                                                                                                                                                                                                                                                                                                                                                                                                                                                                                                                                                                                                                                                                                                                                                                                                                                               |
| GO:0036211 | protein modification process          | 0.015158728724417944 | CD44,C10ORF90,PTPRR,ERG,SEMA4D,RPS6KA5,TAOK3,PRKCB,TRPM6,SLC8A1,SIAH3,FBXO31,BCL2,CAMTA1,SAMSN1,CHFR,RSRC1,CDC42BPA,B3GALT5,RAG1,SNX25,MAPK10,KDM4B,IL6R,RNF182,BRD4,ZDHHC11B,TTC3,TLK1,RCAN1,JAK2,OTUD7A,TPTE2,KALRN,SUMF1,LAMA1,MAST4,NRXN1,AGBL1,ST6GALNAC3,CTDP1,RPS6KA2,ZDHHC17,HLCS,WDR70,NTRK2,OCN,NLK,RNF152,CNTN1,ZNRF3,NRG3,PTPRG,FBXL17,MECOM,STK32B,UBE2E2,SMARCD1,CHRM3,CPE,SPRED2,SLIT2,MYLK3,ROR1,ZNF675,CSNK2A1,AKT3,PHKB,KMT2C,TRIM5,ALPK2,HECW1,ERBB4,STT3A,GPHN,ATRX,MNAT1,TAF4B,RAP1A,TRIO,PTPRE,MYO3B,DUSP22,EXT2,ABL2,MAP3K5,NOS1,NEK4,SLC3A1,PIK3C3,TRAF3,ITGA1,MAPK9,PEAK1,EYA1,MORC3,SPOCK3,ZBTB16,SUPT3H,ROBO1,EGFLAM,PAK3,DPH6,TNKS,NDFIP2,MLLT3,RNF138,PRKCE,PRKAA2,PTPRN2,MYO3A,USP31,UBE2R2,KDM4C,DCUN1D4,SLC1A1,GRM5,EPHA6,IGF1R,CAMK1D,NOS1AP,PTPRO,ZDHHC14,MSRA,INSR,PHF20L1,EGLN3,DOCK3,RELN,STK38,FBXO32,DAPK1,VRK1,APP,CCDC88A,PLCE1,PAK1,NSMCE2,FRY,GHR,RIPK4,PRDM16,RNF217,USP7,PDZRN3,ZZEF1,TTL1L1,EGF,PDGFD,FYN,PRMT8,EPHA7,SENP8,TRABD2B,STK3,CNOT7,USP18,PDE4D,PRKACB,POR,PIGK,HUNK,FUT8,EPHB1,PARP8,EFEMP1,PIGB,HERC1,PARP15,TRPM7,FLT1,EXT1,EFNA5,NXN,CDC14B,HDAC4,STK36,TRPC5,AMFR,SH3BP5,MARK2,ATF2,TUSC3,NTF3,FER,SNRK,CAMK4,GALNT14,FBXL7,TPTE,SLC39A8,RAPGEF2,PRKCQ,PRKCH,DLC1,UBE3A,APC,MACROD2,TTL5,TMTC1,AUTS2,EPHB2,ERC1,TMTC2,MOB3B,NBN,SETD2,TRIM23,NRP1,DAB1,ALK,LDLRAD4,MGAT5,DCLK1,CCNG2,ASB3,HDAC9,PIK3R3,MAP2K6,MTOR,STK38L,KSR1,FBLN1,ST8SIAL,BLM,NCAPG2,STK32A,USP25,SPRED1,ADAM10,PPP2R2C,KANSL1,TULP4,DPY19L2,PTPR,TRIM9,TRERF1,NTRK3,CHKA,ABHD17C,BMPER,HMGA2,PTPRK,PTPRD,LOXL2,PRKG1,RASGRP1,MAGI2,ABI1,GALNTL6,PRKD1,HDAC2,ST6GAL2,TGFA,PRLR,PTPRA,MTMR2,DEPTOR,ATAT1,AKAP13,NEDD9,ENPP1,POMT2,BCL11A,ATE1,PAR3,NRG1,PRKCA,FANCB,DY19L1,CSF2RB,TOP1 |
| GO:0010243 | response to organonitrogen compound   | 0.015423375655413013 | PRKCB,SLC8A1,KCNK1,JAK2,GRIN2A,ARID1B,HLCS,PNPLA3,CTNNA1,NTRK2,SLC24A4,STXBP4,CHRM3,SLIT2,GLP2R,RAP1GDS1,KANK1,RAP1A,PTPRE,HTR2C,PIK3C3,P2RX6,SLC1A2,ITPR2,GABPA,TMEM67,PRKCE,SDK1,SLC1A1,GRM5,IGF1R,CFTR,INSR,APP,RNLS,GNAL,CACNA2D1,HCN1,CHRM5,GHR,KL,PDGFD,FYN,NSG2,SPIDR,SEL1L2,PDE4D,GNG2,PDE3A,POR,ABCC9,EXT1,AMFR,AKAP6,ATF2,FER,GLDC,GABRB3,RAPGEF2,PRKCQ,GABR2,CPS1,NSG1,UBE3A,IDE,APC,TFF1,EPHB2,RYR3,CDH13,ALK,HDAC9,PIK3R3,MTOR,GABRB1,BLM,PSMB2,RGS7,KYNU,USP25,FBN1,RAB31,TBC1D4,PPARA,PLCB1,ELAVL4,BCL2L1,HDAC2,RYR2,PTPRA,ATF6,ENPP1,BCL11A,VPS13C,BCKDHB                                                                                                                                                                                                                                                                                                                                                                                                                                                                                                                                                                                                                                                                                                                                                                                                                                                                                                                                                                                                                                                                                                                                              |
| GO:0043408 | regulation of MAPK cascade            | 0.01553022668486957  | CD44,PTPRR,TAOK3,ANKRD6,GPR55,IL6R,NDRG2,JAK2,NRXN1,ZDHHC17,NTRK2,MECOM,DOK5,SPRED2,ZNF675,TRIM5,RAP1GDS1,ERBB4,RAP1A,DUSP22,MAP3K5,HTR2C,TRAF3,ITGA1,ROBO1,PAK3,PRKCE,GRM5,IGF1R,INSR,STK38,APP,PLCE1,PAK1,GHR,KL,SLAMF1,EDAR,EGF,PDGFD,EPHA7,STK3,GRM1,EPHB1,FLT1,NTF3,RAPGEF2,EPHB2,NRP1,ALK,SEMA3A,MAGI3,CDH2,MAP2K6,KSR1,FBLN1,SPRED1,NTRK3,BMPER,APIP,PLCB1,RASGRP1,TGFA,ZMYND11,AKAP13,PRDM15,NRG1,PRKCA                                                                                                                                                                                                                                                                                                                                                                                                                                                                                                                                                                                                                                                                                                                                                                                                                                                                                                                                                                                                                                                                                                                                                                                                                                                                                                        |

|            |                                         |                      |                                                                                                                                                                                                                                                                                                                                                                                                                                                                   |
|------------|-----------------------------------------|----------------------|-------------------------------------------------------------------------------------------------------------------------------------------------------------------------------------------------------------------------------------------------------------------------------------------------------------------------------------------------------------------------------------------------------------------------------------------------------------------|
| GO:0048729 | tissue morphogenesis                    | 0.016937367181254326 | CD44, ANKRD6, BCL2, ASTN2, NTN4, LAMA1, WDPCP, LAMA3, EXOC4, MYO9A, ZNRF3, DLG5, ARHGAP24, SLIT2, ROR1, ERBB4, EXT2, ITGA8, ALDH1A2, EYA1, ROBO1, OVOL2, MLLT3, PRICKLE2, NTN1, SHROOM3, COBL, GPC6, PAK1, CECR2, RIPK4, STARD13, ADAMTS16, TIAM1, PBX1, FMN1, ZFPM2, EGF, EPHA7, STK3, PCDH15, ESR1, ARHGAP12, PRKACB, GREB1L, AJAP1, EXT1, LRP2, KRT25, DLC1, SETD2, NRP1, SEMA3E, MTOR, CSMD1, GLI3, HMGA2, MAGI2, RALA, RYR2, TBX20, VCL, ROBO2, NRG1, SEMA3C |
| GO:0048013 | ephrin receptor signaling pathway       | 0.017193830652475404 | KALRN, ANKS1B, PAK3, EPHA6, PAK1, TIAM1, FYN, EPHA7, EPHB1, EFNA5, EPHB2, NTRK3, CHN1                                                                                                                                                                                                                                                                                                                                                                             |
| GO:0010721 | negative regulation of cell development | 0.018096964134599273 | SEMA4D, CTNNA1, KANK1, BRINP1, NTN1, MAP2, TNFR, EPHA7, EFNA5, TRPC5, SEMA6D, RAPGEF2, EPHB2, PRTG, NRP1, DAB1, SEMA3A, SEMA3E, FSTL4, FBLN1, NTRK3, FBN1, SEMA3D, SEMA5A, BCL11A, DCC, SEMA3C                                                                                                                                                                                                                                                                    |
| GO:0030517 | negative regulation of axon extension   | 0.01887134911409489  | SEMA4D, NTN1, MAP2, TNFR, SEMA6D, NRP1, SEMA3A, SEMA3E, SEMA3D, SEMA5A, BCL11A, SEMA3C                                                                                                                                                                                                                                                                                                                                                                            |
| GO:0007507 | heart development                       | 0.020035960602883093 | SLC8A1, DNAH11, SORBS2, FGF12, CTDPL1, ADAMTS6, RPS6KA2, CACNA1C, SOX6, CPE, SLIT2, MYLK3, ALPK2, ERBB4, MNAT1, RUNX1, ALDH1A2, EYA1, ANK2, SLIT3, ROBO1, OVOL2, IGF1R, FLRT2, INSR, MYO18B, PLCEL, CXADR, TENM4, NEBL, RARB, ZFPM2, STK3, AP2B1, SGCG, FHOD3, GREB1L, EXT1, AKAP6, ATF2, LRP2, SGCD, DLC1, PDLIM5, SETD2, NRP1, HDAC9, MTOR, FHL2, SPRED1, GLI3, NTRK3, FBN1, SGCG, PPARA, RYR2, TBX20, ROBO2, AKAP13, NRG1, SEMA3C                              |
| GO:0048880 | sensory system development              | 0.02004043025908226  | BCL2, THRB, MEGF11, LAMA1, WDPCP, CACNA1C, NTRK2, SMARCA4, NHR, SPRED2, CRB1, ALDH1A2, MDM1, DSCAM, SDK1, SLC1A1, CELF4, MIF, HCN1, MEIS2, RARB, PBX1, VSTM4, EPHB1, EFEMP1, FLT1, TENM3, ATP8A2, TTLL5, EPHB2, ADAMTS18, NRP1, RPGRIP1, SEMA3A, DCLK1, RORB, SPRED1, SIPA1L3, ABCB5, GLI3, FBN1, SCAPER, NPHP4, MYH15, HDAC2, FAT3, ATF6                                                                                                                         |
| GO:0001654 | eye development                         | 0.022934640327953656 | BCL2, THRB, MEGF11, LAMA1, WDPCP, CACNA1C, NTRK2, SMARCA4, NHR, SPRED2, CRB1, ALDH1A2, MDM1, DSCAM, SDK1, SLC1A1, CELF4, MIF, HCN1, MEIS2, RARB, PBX1, VSTM4, EPHB1, EFEMP1, FLT1, TENM3, ATP8A2, TTLL5, EPHB2, ADAMTS18, NRP1, RPGRIP1, DCLK1, RORB, SPRED1, SIPA1L3, ABCB5, GLI3, FBN1, SCAPER, NPHP4, MYH15, HDAC2, FAT3, ATF6                                                                                                                                 |
| GO:0050768 | negative regulation of neuro            | 0.024268363348262146 | SEMA4D, CTNNA1, BRINP1, NTN1, MAP2, TNFR, EPHA7, TRPC5, SEMA6D, RAPGEF2, EPHB2, PRTG, NRP1, DAB1, SEMA3A, SEMA3E, FSTL4, NTRK3, SEMA3D, SEMA5A, BCL11A, DCC, SEMA3C                                                                                                                                                                                                                                                                                               |



|            |                                      |                      |                                                                                                                                                                                                                                                                                                                            |
|------------|--------------------------------------|----------------------|----------------------------------------------------------------------------------------------------------------------------------------------------------------------------------------------------------------------------------------------------------------------------------------------------------------------------|
|            | genes                                |                      |                                                                                                                                                                                                                                                                                                                            |
| GO:0019932 | second-messenger-mediated signaling  | 0.024401484025134926 | SLC8A1, CAMTA1, RCAN1, NFAT5, GRIN2A, ADCYAP1R1, CACNA1C, SLC24A4, PDE10A, CHRM3, NOS1, HTR2C, PTGFR, ANK2, GRIN2B, ITPR2, EFHB, GRM5, NR5A2, NOS1AP, INPP5A, PLCE1, PPP1R9A, PDE4D, PDE3A, MCTP2, HDAC4, AKAP6, SGCD, RAPGEF2, MCTP1, CDH13, RCAN2, MTOR, KSR1, FHL2, PRKG1, RYR2, NRG1                                   |
| GO:0045927 | positive regulation of growth        | 0.024567930456201505 | SEMA4D, TEAD1, CD38, BCL2, MTPN, CSNK2A1, ERBB4, MACF1, PLS1, BBS2, DSCAM, NTN1, INSR, CDH4, GHR, DISC1, ZFPM2, RIMS1, EFNA5, TRPC5, AKAP6, ATP8A2, INO80, NRP1, RFTN1, MTOR, ADAM10, SYT1, PLCB1, TBX20, RIMS2, SEMA5A, BCL11A, NRG1                                                                                      |
| GO:2000311 | regulation of AMPA receptor activity | 0.025714911582076887 | CACNG2, NRXN1, NLGN1, SHISA9, CNIH3, RELN, GSG1L, SHISA6, CACNG3                                                                                                                                                                                                                                                           |
| GO:0007265 | Ras protein signal transduction      | 0.02588565974653477  | GPR55, CDC42EP3, RASGEF1B, ELM01, RAPGEF5, ARHGAP24, PSD3, KANK1, RAP1A, ABL2, RERG, ROBO1, ARHGEF11, DGKI, NTN1, CTNNA1, RASGRF2, PLCE1, EPS8, RASGRF1, STARD13, RGL1, TIAM1, RALGPS1, ARHGAP42, NET1, RALGPS2, MAPRE2, RAPGEF2, DLC1, AUTS2, EPHB2, NRP1, CDH13, KSR1, SCAI, RAPGEF4, RASGRP1, RALA, PRKD1, AKAP13, NRG1 |
| GO:0046660 | female sex differentiation           | 0.02598088277770804  | A2M, BCL2, ADCYAP1R1, CTNNA1, GAS2, SLIT2, SLIT3, INSR, ZFPM2, ESR1, ACSBG1, LRP2, IMMP2L, UBE3A, DACH1, NRIP1, ARID5B, CSM1, SCAPER, BCL2L1, ROBO2                                                                                                                                                                        |
| GO:0018209 | peptidyl-serine modification         | 0.02691731052097304  | CD44, RPS6KA5, PRKCB, BCL2, TLK1, MAST4, NRXN1, RPS6KA2, NTRK2, NLK, STK32B, CSNK2A1, AKT3, NOS1, MAPK9, MORC3, SPOCK3, EGF, LAM, TNKS, PRKCE, SLC1A1, CAMK1D, STK38, VRK1, APP, PAK1, PDE4D, MARK2, NTF3, CAMK4, PRKCQ, PRKCH, DCLK1, MTOR, STK38L, STK32A, NTRK3, PRKD1, PRKCA, TOP1                                     |
| GO:0018105 | peptidyl-serine phosphorylation      | 0.027487870764118433 | CD44, RPS6KA5, PRKCB, BCL2, TLK1, MAST4, NRXN1, RPS6KA2, NTRK2, NLK, STK32B, CSNK2A1, AKT3, NOS1, MAPK9, MORC3, TNKS, PRKCE, SLC1A1, CAMK1D, STK38, VRK1, APP, PAK1, PDE4D, MARK2, NTF3, CAMK4, PRKCQ, PRKCH, DCLK1, MTOR, STK38L, STK32A, NTRK3, PRKD1, PRKCA, TOP1                                                       |
| GO:0055006 | cardiac cell development             | 0.02907509169318759  | SLC8A1, SORBS2, CTDPI, MYLK3, ALPK2, MYO18B, CXADR, NEBL, FHD3, AKAP6, SGCD, PDLIM5, MTOR, FHL2, PPARA, AKAP13                                                                                                                                                                                                             |

|            |                                              |                      |                                                                                                                                                                                                                                                                                                                                  |
|------------|----------------------------------------------|----------------------|----------------------------------------------------------------------------------------------------------------------------------------------------------------------------------------------------------------------------------------------------------------------------------------------------------------------------------|
|            | opment                                       |                      |                                                                                                                                                                                                                                                                                                                                  |
| GO:0150063 | visual system development                    | 0.0297317426483145   | BCL2, THRB, MEGF11, LAMA1, WDPCP, CACNA1C, NTRK2, SMARCA4, NHR1, SPRED2, CRB1, ALDH1A2, MDM1, DSCAM, SDK1, SLC1A1, CELF4, MIF, HCN1, MEIS2, RARB, PBX1, VSTM4, EPHB1, EFEMP1, FLT1, TENM3, ATP8A2, TTL5, EPHB2, ADAMTS18, NR1, RPGRIP1, DCLK1, RORB, SPRED1, SIPA1L3, ABCB5, GLI3, FBN1, SCAPER, NPHP4, MYH15, HDAC2, FAT3, ATF6 |
| GO:0051146 | striated muscle cell differentiation         | 0.030653219848824503 | SLC8A1, BCL2, SORBS2, RCAN1, CTDP1, KCNH1, MTPN, SOX6, PTGFRN, PGM5, MYLK3, ALPK2, NOS1, MYOM2, JAM2, ADAMTS5, MYO18B, ADAM12, CXADR, NEBL, RARB, FHOD3, HDAC4, AKAP6, SGCD, PDLIM5, MYEF2, CDH2, TANC1, HDAC9, MTOR, FHL2, PPARA, AKAP13, NRG1                                                                                  |
| GO:0060537 | muscle tissue development                    | 0.03169979502461116  | SLC8A1, BCL2, SORBS2, RCAN1, CTDP1, MEOX2, MTPN, SOX6, PGM5, MYLK3, ALPK2, ERBB4, ITGA8, RUNX1, ALDH1A2, EYA1, MYO18B, CXADR, TENM4, RBFOX1, NEBL, RARB, ZFPM2, COL19A1, SGCZ, EPHB1, FHOD3, HDAC4, AKAP6, LRP2, SGCD, PDLIM5, HDAC9, MTOR, FHL2, FLNB, SGCG, PPARA, MYH15, TNN, RYR2, TBX20, AKAP13, HIVEP3, NRG1, SEMA3C       |
| GO:0006813 | potassium ion transport                      | 0.032526977140880216 | KCNMA1, SLC12A8, KCNC1, KCNQ5, KCNJ6, KCNK10, DPP6, KCNH1, SLC24A4, KCNE4, KCNS3, NOS1, SLC9C1, ANK2, KCNH8, SLC12A1, KCNP4, NOS1AP, ANK3, DPP10, HCN1, KCND3, KCNN3, KCNAB1, ABCC9, AKAP6, KCND2, SLC24A3, RGS7, SLC24A2, KCNH5, KCNJ15                                                                                         |
| GO:0099560 | synaptic membrane adhesion                   | 0.03657588480278346  | NRXN1, NLGN1, GPC6, LRFN5, LRRC4C, EFNA5, NTNG1, PTPRD, NRG1                                                                                                                                                                                                                                                                     |
| GO:0050805 | negative regulation of synaptic transmission | 0.0380308239919109   | CD38, GRIK2, GRIK3, SHANK2, RAP1A, DGKI, TNFR, CELF4, HCN1, SORCS2, GRIA1, SORCS3, GRID2, SLC24A2, MTMR2                                                                                                                                                                                                                         |
| GO:2001222 | regulation of neuron migration               | 0.03884169426198854  | FBXO31, NRG3, UNC5D, FLRT2, RELN, PHACTR1, NTNG1, RAPGEF2, SEMA3A, TNN, CTNNA2, NRG1                                                                                                                                                                                                                                             |
| GO:0055007 | cardiac muscle                               | 0.03885724162845732  | SLC8A1, SORBS2, CTDP1, SOX6, MYLK3, ALPK2, MYO18B, CXADR, NEBL, RARB, FHOD3, AKAP6, SGCD, PDLIM5, MTOR, FHL2, PPARA, AKAP13, NRG1                                                                                                                                                                                                |

|            |                                              |                      |                                                                                                                                                                                                                                                                                                                                                                                                                                                                                                                                                                                                                                                                                                                                                                                                                                                                                                                                                                                                                                                                                                                                                                                                                                                                                                                                                                                                                                                                                                                                                                                                                                                                                                                               |
|------------|----------------------------------------------|----------------------|-------------------------------------------------------------------------------------------------------------------------------------------------------------------------------------------------------------------------------------------------------------------------------------------------------------------------------------------------------------------------------------------------------------------------------------------------------------------------------------------------------------------------------------------------------------------------------------------------------------------------------------------------------------------------------------------------------------------------------------------------------------------------------------------------------------------------------------------------------------------------------------------------------------------------------------------------------------------------------------------------------------------------------------------------------------------------------------------------------------------------------------------------------------------------------------------------------------------------------------------------------------------------------------------------------------------------------------------------------------------------------------------------------------------------------------------------------------------------------------------------------------------------------------------------------------------------------------------------------------------------------------------------------------------------------------------------------------------------------|
|            | cell differentiation                         |                      |                                                                                                                                                                                                                                                                                                                                                                                                                                                                                                                                                                                                                                                                                                                                                                                                                                                                                                                                                                                                                                                                                                                                                                                                                                                                                                                                                                                                                                                                                                                                                                                                                                                                                                                               |
| GO:0050806 | positive regulation of synaptic transmission | 0.04081791249295337  | GRIK2,IGSF11,CACNG2,GRIN2A,NRXN1,NTRK2,CACNB2,SHANK2,GRIN2B,PRKCE,SLC1A1,NLGN1,RELN,RASGRF2,TNR,APP,CLSTN2,RIMS1,NSG1,EPHB2,SLC24A2,SYT1,TSHZ3,CACNG3,RIMS2                                                                                                                                                                                                                                                                                                                                                                                                                                                                                                                                                                                                                                                                                                                                                                                                                                                                                                                                                                                                                                                                                                                                                                                                                                                                                                                                                                                                                                                                                                                                                                   |
| GO:0006996 | organellar organization                      | 0.045271543990990225 | C10ORF90,PARN,ZFYVE1,PRKCB,DNAJC15,SHAH3,TRAPPC9,BCL2,CHFR,CDC42BPA,SAMM50,CDC42EP3,UNC13B,SORBS2,KIF4A,JA K2,BICD1,EPB41L3,PARVB,CDS2,MAST4,NRXN1,ARID1B,WDCPC,CTDP1,GOLGA6D,CORO2B,MAPK9,FAM171A1,HSF2BP,FRMD6,PLS1,CLN,THSD7A,AFAP1,IQCJ-SCHIP1,LRRCA4,ELMO1,SYNE1,GAS2,MTPN,ESYT2,PDE4DIP,DNAH8,SHANK2,PTGFRN,CHCHD6,PGM5,SMARCA1,CALD1,S LIT2,MYLK3,AKT3,RAP1GDS1,ERBB4,KANK1,ATRX,DMRT1,BID,MACF1,MNAT1,RAD51B,ABL2,SPAG16,EML1,PIK3C3,CHD6,HMCN1,FGD4,GOLGA6D,CORO2B,MAPK9,FAM171A1,HSF2BP,FRMD6,PLS1,ANK2,PAK3,TNKS,MDM1,FCHSD2,TRAPPC10,LEMD3,EHBP1,PSTPI P2,ITGB3BP,TMEM67,PRKCE,ARHGEF11,PRKAA2,BBS2,CHCHD3,M YOM2,NUBPL,ANKFN1,TRAPPC8,SPTB,SNX30,NLGN1,SHROOM3,MA P2,NOS1AP,INSR,COBL,MDN1,CLEC16A,ANK3,MORC2,TBCD,RELN,VAV3,VRK1,CCDC88A,PLCE1,TACC2,PAK1,ADCK1,TOP3A,NSMCE 2,CXADR,EPS8,UTRN,CECR2,FRMD5,USP7,STARD13,PPP1R9A,ADAMTS16,SLAMF1,INO80D,TTL11,NEBL,PHACTR1,SLC39A12,DIS C1,FMN1,VTI1A,ASAP1,FRMPD4,EGF,IFT43,LRBA,MAP7,NAV2,CNOT7,PCDH15,ARHGAP12,PDE3A,FHOD3,ARMC2,MIPPEP,SNAP29,D IAPH3,TRPM7,EXT1,EFNA5,CDC14B,TLN2,C14ORF39,STK36,KLH L1,VPS37A,MARK2,ATF2,PHACTR2,GRID2,ZNF423,NTF3,FER,TT C29,MAPRE2,ARFGAP3,RAD51AP1,TMEM108,NAV3,IMMP2L,PRKCQ,NUDCD3,RHPN2,KRT25,DLC1,ATP8A2,MPRIAP,APC,TTL5,INO80,AUTS2,PDLIM5,NBN,FRMD3,SETD2,PACSIN2,PKP1,DOCK2,SDCCAG8,NRP1,RFC3,PHACTR3,RPGRIP1,TRDN,SEMA3E,DCLK1,CDH2,VPS41,SYCP1,ARHGAP28,MTOR,BLM,SH3KBP1,NCAPG2,CD2AP,TT C39C,CLVS2,SIPAL13,FLNB,SPECC1,NTRK3,HYDIN,CHKA,RAB31,CTNNA3,VPS13D,ANKRD31,ATF7IP,HMGA2,THSD7B,TBC1D4,SYT1,DPF3,NPHP4,PTPRD,PLCB1,PRKG1,STXBP6,STX12,ABI1,RALA,GNPTAB,PRKD1,BCL2L1,MICAL3,ETS1,TGFA,ATAT1,IFT81,AKA P13,NEDD9,UNC13C,RAB27A,CLIP1,SEMA5A,CTNNA2,CEP44,PAR D3B,VPS13C,PARD3,ATP10B,PRKCA,FMN2,PCNT,TOP1 |
| GO:0043412 | macromolecular modification                  | 0.045787650853022915 | CD44,C10ORF90,PTPRR,ERG,PARN,SEMA4D,RPS6KA5,TAOK3,PRKCB,TRPM6,SLC8A1,SHAH3,FBXO31,BCL2,CAMTA1,SAMSN1,CHFR,THADA,RSRC1,CDC42BPA,B3GALT5,RAG1,SNX25,MAPK10,KDM4B,IL6R,RNF182,BRD4,ZDHHC11B,TTC3,TLK1,RCAN1,JAK2,OTUD7A,TPTE2,KALRN,SUMF1,LAMA1,MAST4,NRXN1,DTWD2,AGBL1,ST6GALNAC3,CTDP1,RPS6KA2,ZDHHC17,HLCS,WDR70,NTRK2,OCN,NL K,RNF152,CNTN1,ZNRF3,NRG3,PTPRG,FBXL17,MECOM,STK32B,UBE2E2,SMARCA1,CHRM3,CPE,SPRED2,SLIT2,MYLK3,ROR1,ZNF675,CSNK2A1,AKT3,PHKB,KMT2C,TRIM5,ALPK2,HECW1,ERBB4,STT3A,GPHN,ATRX,MNAT1,TAF4B,RAP1A,TRIO,TRMT61B,PTPRE,MYO3B,DUSP22,EXT2,ABL2,MAP3K5,NOS1,NEK4,SLCO3A1,PIK3C3,TRAF3,ITGA1,MAPK9,PEAK1,EYA1,MORC3,SPOCK3,ZBTB16,SUPT3H,ROBO1,EGFLAM,PAK3,DPH6,TNKS,NDFIP2,MLLT3,RNF138,PRKCE,PRKAA2,PTPRN2,MYO3A,USP31,UBE2R2,KDM4C,DCUN1D4,SLC1A1,GRM5,EPHA6,IGF1R,CAMK1D,NOS1AP,PTPRO,ZDHHC14,MSRA,INSR,PHF20L1,EGLN3,DOCK3,RELN,STK38,FBXO32,CDKAL1,DAPK1,VRK1,APP,CCDC88A,PLCE1,PAK1,NSMCE2,FRY,GHR,RIPK4                                                                                                                                                                                                                                                                                                                                                                                                                                                                                                                                                                                                                                                                                                                                                                                          |

|            |                                      |                      |                                                                                                                                                                                                                                                                                                                                                                                                                                                                                                                                                                                                                                                                                                                                                                                                                                                                                                                                                                                                 |
|------------|--------------------------------------|----------------------|-------------------------------------------------------------------------------------------------------------------------------------------------------------------------------------------------------------------------------------------------------------------------------------------------------------------------------------------------------------------------------------------------------------------------------------------------------------------------------------------------------------------------------------------------------------------------------------------------------------------------------------------------------------------------------------------------------------------------------------------------------------------------------------------------------------------------------------------------------------------------------------------------------------------------------------------------------------------------------------------------|
|            |                                      |                      | , PRDM16, RNF217, USP7, PDZRN3, ZZEF1, TTL11, EGF, PDGFD, FYN, PRMT8, EPHA7, SENP8, TRABD2B, STK3, CNOT7, USP18, TOX, PDE4D, PRKACB, POR, PIGK, HUNK, FUT8, EPHB1, PARP8, EFEMP1, PIGB, HERC1, PARP15, TRPM7, FLT1, EXT1, EFNA5, NXN, CDC14B, HDAC4, STK36, TRPC5, AMFR, MRM1, FTO, SH3BP5, MARK2, ATF2, TUSC3, NTF3, FER, SNRK, CAMK4, GALNT14, FBXL7, TPTE, SLC39A8, RAPGEF2, PRKQ, PRKCH, DLC1, UBE3A, APC, MACROD2, TTL5, TMTC1, AUTS2, EPHB2, ADARB2, ERC1, TMTC2, MOB3B, NBN, SETD2, TRIM23, NRP1, DAB1, ALK, LDLRAD4, MGAT5, DCLK1, CCNG2, ASB3, HDAC9, PIK3R3, MAP2K6, MTOR, STK38L, KSR1, FBLN1, ST8SIA1, BLM, NCAPG2, STK32A, USP25, SPRED1, ADAM10, PPP2R2C, KANSL1, TULP4, DPY19L2, PTPRT, TRIM9, TRERF1, NTRK3, CHKA, ABHD17C, BMPER, ATF7IP, HMGA2, NSUN2, PTPRK, PTPRD, LOXL2, PRKG1, RASGRP1, MAGI2, ABI1, GALNTL6, PRKD1, HDAC2, ST6GAL2, TGFA, PRLR, PTPRA, MTMR2, DEPTOR, ATAT1, AKAP13, NEDD9, ENPP1, POMT2, BCL11A, ATE1, PARD3, NRG1, PRKCA, FANCB, DPY19L1, CSF2RB, TOP1 |
| GO:0035265 | organ growth                         | 0.047090486434941216 | EVC, BCL2, SORBS2, CTDPI, ERBB4, RUNX1, CXADR, TENM4, RARB, ZFPM2, STK3, ESR1, POR, EXT1, AKAP6, ATF2, UBE3A, PDLIM5, FLVCR1, PPARA, PRLR, TBX20, AKAP13, NRG1                                                                                                                                                                                                                                                                                                                                                                                                                                                                                                                                                                                                                                                                                                                                                                                                                                  |
| GO:2000146 | negative regulation of cell motility | 0.048419503548104766 | PTPRR, BCL2, CTNNA1, SRGAP2B, MEOX2, NRG3, PTPRG, DLG5, SLIT2, KANK1, DUSP22, SPOCK3, ROBO1, RIN3, MIF, FRMD5, STARD13, SEMA6D, NAV3, DLC1, MCTP1, DACH1, LDLRAD4, FBLN1, SPRED1, SCAI, PTPRT, PTPRK, PLCB1, PRKG1, MAGI2, HDAC2, TNN, VCL, SRGAP3, NEDD9, NRG1                                                                                                                                                                                                                                                                                                                                                                                                                                                                                                                                                                                                                                                                                                                                 |

**Table S6.** GO associations with biological processes (GO Profiler) of 1307 rDNA-contacting genes associated with genes increase the number of contacts with rDNA clusters. The search was performed using g:Profiler (<https://biit.cs.ut.ee/gprofiler/gost>). Related to Figure 2B.

| GO.ID      | Description                    | padj                   | Genes                                                                                                                                                                                                                                                                                                                                                                                                                                                                                                                                                                                                                                                                                                                                                                                                                                                                                                                                                                                                                                                                                                                                                                                                                                                                                                                                                                                                            |
|------------|--------------------------------|------------------------|------------------------------------------------------------------------------------------------------------------------------------------------------------------------------------------------------------------------------------------------------------------------------------------------------------------------------------------------------------------------------------------------------------------------------------------------------------------------------------------------------------------------------------------------------------------------------------------------------------------------------------------------------------------------------------------------------------------------------------------------------------------------------------------------------------------------------------------------------------------------------------------------------------------------------------------------------------------------------------------------------------------------------------------------------------------------------------------------------------------------------------------------------------------------------------------------------------------------------------------------------------------------------------------------------------------------------------------------------------------------------------------------------------------|
| <b>BP</b>  |                                |                        |                                                                                                                                                                                                                                                                                                                                                                                                                                                                                                                                                                                                                                                                                                                                                                                                                                                                                                                                                                                                                                                                                                                                                                                                                                                                                                                                                                                                                  |
| GO:0050794 | regulation of cellular process | 2.0864298608533356e-13 | WWC1, GARNL3, MTOR, SMOC1, NSG1, LRP12, PLCB1, SPOCK1, ABCA13, ANKS1B, ZNF536, KSR1, BRINP3, SGCD, CACNA2D3, CNTN4, KCN5, ZFPM2, TENM4, RIPOR2, RP1, ERC1, ODAD2, KCNMA1, FBN1, CDH8, CDC1, RIMS1, PIK3C3, SPIRE1, TENM3, RARB, ENPEP, USH2A, MINAR1, CDC42EP3, RIMS2, ADGRE1, CDYL2, PJA2, BABAM2, ERBIN, RHPN2, CACNG2, NEGR1, MAP3K9, MYO3B, TCF4, ZNF573, NEK4, DOCK10, TSHZ2, EGFR, DENND1A, USP14, ANGPT1, CDK12, MACF1, PRKACB, NEK7, NCOR1, DOCK2, ZNF407, NEDD4, MAML2, NSMCE2, BTBD9, SOX6, PHACTR1, DKK2, DNAJC13, THRAP3, MAPKBP1, GABRB1, DGKI, C12ORF4, GRIA1, CAST, NEO1, CNTN6, SLC39A12, SLC8A3, TOM1L2, PAK1, EPHA7, CTNNA1, NCOA7, RALGPS1, SPEN, RAPGEF2, ADGRB3, RUNX2, ARSB, GABRA6, TAOK3, CPEB4, PRICKLE2, LDB2, PUM3, PATJ, RPTOR, EPB41L3, COL4A2, PPP1R12B, ADAM10, IL1R1, APBB2, KDM1B, CACNB2, KLHL13, MTUS1, STAU2, TMC1, USP18, SEMA5A, SYT1, VCL, ARHGAP44, NTF3, ACER2, PARP15, AURKA, CFDP1, PYGO1, SLC8A1, SSBP2, SRGAP2C, ANKRD31, TAF12, SRGAP2B, MAP4K4, BMPR1B, FMN2, HOMER2, RAB8B, PAK3, RFTN1, PDE1A, ZNF257, DIP2B, LARP1, ITPKB, RGS20, PDE10A, RAP1GDS1, HHAT, CLIC6, KICS2, SCP2, IFT57, INTS7, PRKCZ, BTLA, GRB10, MCPH1, CNST, RGS9, DEFA3, MBNL2, ABCA5, SENP6, EBF2, YAP1, PPM1L, RIPK4, RABGAP1L, USP25, ALCAM, PLG, PAPP, PDGFD, ZNRF3, ITGBL1, UBE2O, GFRA1, SYCP1, NIPBL, EWSR1, MICU1, CORO2B, CARD18, CHD6, STK38, HRH4, SORCS3, MYLK3, KANSL1, MBNL1, A |

|            |                       |                       |                                                                                                                                                                                                                                                                                                                                                                                                                                                                                                                                                                                                                                                                                                                                                                                                                                                                                                                                                                                                                                                                                                                                                                                                                                                                                                                                                                                                                                                                                                                                                                                                                                                                                                                                                                                                                                                                                                                                                                                                                                                                                                                                                                                                                                                                                                                                                                                                                                                                                                                                                                                                                                                                                                                                                                                                                                                                                                                                                                                                                                |
|------------|-----------------------|-----------------------|--------------------------------------------------------------------------------------------------------------------------------------------------------------------------------------------------------------------------------------------------------------------------------------------------------------------------------------------------------------------------------------------------------------------------------------------------------------------------------------------------------------------------------------------------------------------------------------------------------------------------------------------------------------------------------------------------------------------------------------------------------------------------------------------------------------------------------------------------------------------------------------------------------------------------------------------------------------------------------------------------------------------------------------------------------------------------------------------------------------------------------------------------------------------------------------------------------------------------------------------------------------------------------------------------------------------------------------------------------------------------------------------------------------------------------------------------------------------------------------------------------------------------------------------------------------------------------------------------------------------------------------------------------------------------------------------------------------------------------------------------------------------------------------------------------------------------------------------------------------------------------------------------------------------------------------------------------------------------------------------------------------------------------------------------------------------------------------------------------------------------------------------------------------------------------------------------------------------------------------------------------------------------------------------------------------------------------------------------------------------------------------------------------------------------------------------------------------------------------------------------------------------------------------------------------------------------------------------------------------------------------------------------------------------------------------------------------------------------------------------------------------------------------------------------------------------------------------------------------------------------------------------------------------------------------------------------------------------------------------------------------------------------------|
|            |                       |                       | <p>TF6,ZNF684,CCNG2,TLK1,TPM1,LRR38,BIRC6,KLF15,PPARA,SNX30,KCNS3,PPP6R3,SYNJ1,ADAMTS3,ARAP2,PTPRK,ARHGEF12,TRERF1,SEMA3C,DAPK1,SLC24A4,SEC14L1,VPS13C,STK32B,PHC3,MAGI1,ALPK2,DNAH11,JARID2,SCN2A,DNAJC15,GATAD2B,CPE,EVC2,IL34,TANC1,ZNF846,MELK,BBS2,RANBP3L,OR4F6,NGK7,USP8,PIAS1,BLK,EBF1,TNR,MXI1,OXR1,SDC2,GAS2,KCNH1,MRPS27,CREG1,DROSHA,APBB1IP,EIPR1,SLFN11,GLIS1,MORC1,MYO10,LATS2,SGS1L,ASPM,AP3B1,DENND2B,ATP11C,ZNF438,ABCB7,ZBTB16,MUSK,KIR3DL2,GNG7,SMARCA1,SETDB2,PRKCE,FOXK2,SLMAP,ZNF718,USP33,CD44,RGS12,PTPRO,PRRC1,ABCC9,STXBP6,NSMAF,LNPEP,LIMD1,PEX14,SPRED2,RPS6KA3,PTPN2,PLXNA2,MCF2L,OR4F15,ATXN3,RIC3,ARHGEF7,ALG10B,ATP8A1,AMBRA1,KDM7A,OPRM1,FANCA,SEMA3E,RPRD1B,TMEM67,ABHD17C,TMOD2,MSH2,ZNF397,RELL1,HIPK3,EPN2,CLSPN,BICRAL,MO SMO,MNAT1,TMEM116,MDFIC,ANK3,HMGA2,BCL11B,VPS41,D OCK5,STK32A,LYPLA1,PLCE1,IL17RA,CRIM1,FUT9,PRR5L,VAV1,MYT1L,ZNF160,HLA-</p> <p>B,IQSEC1,CACNA1I,PDLIM5,BLM,NRK,MAGI3,INTS8,LIN54,ADCY10,BMP2,RC3H2,ATP9A,TRAK1,GFI1B,RIN3,BMP2K,SEMA3D,NETO2,NFATC2,SH3BP5,SLC23A2,ZNF106,MYOM1,TRAF3,ANKRD26,TTC21B,ZNF875,UIMC1,LRRFIP1,RAP1GAP,I KZF2,DRAXIN,ATF1,KCNH8,CGAS,GABRR2,CNKS3,CASP5,V ENTX,WDR12,KIF15,PRDM10,CUL1,BTAF1,ZNF618,FARP1,MOB1B,BBS4,MAPK8IP1,COL5A1,CFTR,ME2,UBASH3A,AHDC1,MRPL13,KITLG,YLPM1,UTF2I,TADA2A,ZNF208,NMD3,AKAP10,PTPRE,MTMR2,ZNF608,TBX20,SP110,AFAP1,WSB1,PRKCH,TG,IL6R,ALS2,ZNF627,OR51E1,TDFP1,HEMGN,KANK4,SNX25,TOX,PTPRB,PDE6A,SCN10A,USP7,ENPP3,PLAGL1,MESD,MOK,KIR2DL4,RALB,NPAS2,VCAM1,SEL1L,ARHGAP31,ZNF169,KIF11,DTX1,ZBTB33,ADA2,FANCL,DPYSL5,ZNF44,SUPT16H,BAZ1A,CUL5,OR7A17,NEK6,HECTD1,NMU,GAST,SNAI2,I GHV3-</p> <p>74,BID,SIAH2,RXRG,SP3,ERN2,ZNF879,MBTPS2,FLNB,TRIM58,TIAL1,ELF2,ZDHC17,FYCO1,SH3GLB1,SAMHD1,IFT81,ENPP1,TP53I11,TMEM225,KCNC1,CSF1,GHRF,BCL2L1,CTDP1,ASB4,DHRS3,SMAD5,TCERG1,SLC40A1,PRAME,CIDEC,LPGAT1,MED1,CDC14B,CFH,SCML2,PRAMEF25,PTH,PRKAA2,CSF2RB,SOHLH1,PHF20L1,ABHD2,VSTM2A,PLA2G4A,CAMLG,COX7A2L,ZBTB7C,TEAD1,ANP32B,YBX3,AIMP1,FYB2,PCID2,ZNF234,CIBAR1,PBLD,FICD,CADM1,PEG10,NFT1,ELOC,ANLN,SLC1A7,VSX1,FSTL1,SVEP1,MADD,HCRTR1,PATL1,ZNF287,ZNF449,PRSS2,CREBBP,MELTF,GORAB,SIAH3,NFKBIA,ABC8,ZC3H15,RFC2,ZNF354C,ALX4,RTRAF,ZBTB21,NEDD9,OLFM4,ASS1,ADGRE3,SAR1A,PPP1R17,BTG3,ERLIN2,OTOP1,ZBTB49,EXOC1,HEPACAM,KRT6A,STOX2,AGO1,GID8,ELL2,FAM189A2,NDFIP2,NR2C1,CMTM7,GATAD1,MTPN,ABI1,ITGA4,OAZ2,ZSCAN30,POU1F1,UBE2J2,TM9SF4,OR6C75,ASB2,CEP120,ZSCAN5C,CYFIP2,HNRNPM,ASCC2,OR13C9,ARID3B,RXR A,ADGRB1,WNT7A,NDFIP1,MAP3K4,SERPINI2,FOXO6,ZNF112,ATP6V1C2,C16ORF72,MAGEL2,OR10H2,PDE2A,LRR2,SDCBP,JPT2,NSMCE1,ZNF813,MLLT1,NCK1,SCAF8,FCR,C2,IFNAR1,RNF8,CYTH4,INTS13,DNMT3L,LHX9,WNT2B,OCLN,POSTN,CD101,AKAP11,DTHD1,MVB12B,CD5L,ANKRD6,SCGN,ASCL3,FEZ2,INIP,LAMB1,ZNF66,KIRREL1,PLCZ1,FCRLA,DIDO1,GPR55,NSUN2,TNFSF11,ZNF705G,PPM1F,ARL13B,SH2D3C,TRNAU1AP,ZFYVE28,TET1,ASB3,RAD9A,RP1L1,ZNF705D,ITGA1,POR,ZNF850,ZNF235,NSG2,B9D1,PRDM15,SRGAP3,MACROH2A1,TOGARAM1,CSNK1G1,ZNF705B,ATP6VOD2,SERPINB2,ATG5,UNK,FLRT2,OR2T2,BTBD10,TMEM25,NUDT21,DDX6,PP1R13B,RFK2,PKNOX2</p> |
| GO:0065007 | biological regulation | 1.3739950414517639e-9 | <p>WWC1,GARNL3,MTOR,SMOC1,NSG1,LRP12,TMPRSS2,PLCB1,SPOCK1,ABCA13,ANKS1B,ZNF536,KSR1,BRINP3,SGCD,CACNA2D3,CNTN4,KCNH5,ZFPM2,PIEZO2,TENM4,RIPOR2,RP1,ERC1,ODAD2,KCNMA1,FBN1,F13A1,CDH8,DCDC1,RIMS1,PIK3C3,SPIRE1,TENM3,RARB,NAV2,ENPEP,USH2A,MINAR1,CDC42E</p>                                                                                                                                                                                                                                                                                                                                                                                                                                                                                                                                                                                                                                                                                                                                                                                                                                                                                                                                                                                                                                                                                                                                                                                                                                                                                                                                                                                                                                                                                                                                                                                                                                                                                                                                                                                                                                                                                                                                                                                                                                                                                                                                                                                                                                                                                                                                                                                                                                                                                                                                                                                                                                                                                                                                                                   |

|  |  |  |                                                                                                                                                                                                                                                                                                                                                                                                                                                                                                                                                                                                                                                                                                                                                                                                                                                                                                                                                                                                                                                                                                                                                                                                                                                                                                                                                                                                                                                                                                                                                                                                                                                                                                                                                                                                                                                                                                                                                                                                                                                                                                                                                                                                                                                                                                                                                                                                                                                                                                                                                                                                                                                                                                                                                                                                                                                                                                                                                                                                                                                                                                                                                                                                                                                                                                                                                                                                                                                                                                                                                                                                                                                                                                                                                                                                                                                                     |
|--|--|--|---------------------------------------------------------------------------------------------------------------------------------------------------------------------------------------------------------------------------------------------------------------------------------------------------------------------------------------------------------------------------------------------------------------------------------------------------------------------------------------------------------------------------------------------------------------------------------------------------------------------------------------------------------------------------------------------------------------------------------------------------------------------------------------------------------------------------------------------------------------------------------------------------------------------------------------------------------------------------------------------------------------------------------------------------------------------------------------------------------------------------------------------------------------------------------------------------------------------------------------------------------------------------------------------------------------------------------------------------------------------------------------------------------------------------------------------------------------------------------------------------------------------------------------------------------------------------------------------------------------------------------------------------------------------------------------------------------------------------------------------------------------------------------------------------------------------------------------------------------------------------------------------------------------------------------------------------------------------------------------------------------------------------------------------------------------------------------------------------------------------------------------------------------------------------------------------------------------------------------------------------------------------------------------------------------------------------------------------------------------------------------------------------------------------------------------------------------------------------------------------------------------------------------------------------------------------------------------------------------------------------------------------------------------------------------------------------------------------------------------------------------------------------------------------------------------------------------------------------------------------------------------------------------------------------------------------------------------------------------------------------------------------------------------------------------------------------------------------------------------------------------------------------------------------------------------------------------------------------------------------------------------------------------------------------------------------------------------------------------------------------------------------------------------------------------------------------------------------------------------------------------------------------------------------------------------------------------------------------------------------------------------------------------------------------------------------------------------------------------------------------------------------------------------------------------------------------------------------------------------------|
|  |  |  | <p> P3, RIMS2, ADGRE1, CDYL2, PJA2, BABAM2, ERBIN, RHPN2, PARVB, CACNG2, NEGR1, SUSD4, MAP3K9, MYO3B, RTN1, TCF4, ZNF573, NEK4, DOCK10, TSHZ2, EGFR, DENND1A, USP14, ANGPT1, CDK12, MACF1, PRKACB, NEK7, NCOR1, DOCK2, ZNF407, NEDD4, MML2, NSMCE2, BTBD9, SOX6, PHACTR1, DKK2, DNAJC13, THRAP3, MAPKBP1, AOA, GABRB1, DGKI, C12ORF4, GRIA1, CAST, NEO1, CNTN6, SLC39A12, SLC8A3, TOM1L2, TBC1D19, PAK1, EPHA7, CTNNA1, NCOA7, RALGPS1, SPEN, RAPGEF2, ADGRB3, RUNX2, ARSB, GABRA6, CPS1, TAOK3, LDLRAD3, CPEB4, PRICKLE2, LDB2, PPP2R2B, PUM3, PATJ, RPTOR, EPB41L3, COL4A2, PPP1R12B, ADAM10, IL1R1, APBB2, PHACTR2, KDM1B, CACNB2, KLHL13, MTUS1, STAU2, TMC1, USP18, SEMA5A, SYT1, VCL, ARHGAP44, NTF3, ACER2, PARP15, AURKA, CFDP1, PYGO1, SLC8A1, SSBP2, SRGAP2C, ANKRD31, TAF4A, SERPINA6, SRGAP2B, MAP4K4, BMPR1B, FMN2, HOMER2, RAB8B, PAK3, RFTN1, PDE1A, ZNF257, DIP2B, LARP1, ITPKB, RGS20, PDE10A, RAP1GDS1, HHAT, RNLS, CLIC6, CHST8, KICS2, SCP2, IFT57, INTS7, PRKCZ, SPO, BTLA, GRB10, MCPH1, CNST, RGS9, DEFA3, MBNL2, ABCA5, SENP6, EBF2, YAP1, PPM1L, RIPK4, RABGAP1L, USP25, ALCAM, PLG, PAPPA, PDGFD, ZNRF3, ITGBL1, UBE2O, GFRA1, SYCP1, NIPBL, EWSR1, MICU1, CORO2B, CARD18, CHD6, STK38, HRH4, SORCS3, MYLK3, KANS1, MBNL1, ATF6, ZNF684, CCNG2, TLK1, TPM1, LRRC38, CORIN, BIRC6, KLF15, PPARA, SNX30, KCNS3, PPP6R3, SYNJ1, ADAMTS3, ARAP2, PTPRK, ARHGEF12, TRERF1, SEMA3C, DAPK1, SLC24A4, SEC14L1, VPS13C, STK32B, PHC3, MAGI1, ALPK2, DNAH11, JARID2, SCN2A, TBC1D9, RAB22A, DNAJC15, GATAD2B, CPE, EVC2, IL34, TANC1, ZNF846, MELK, BBS2, SLC9C1, RANBP3L, OR4F6, NKG7, USP8, PIAS1, BLK, EBF1, TNFR, MXI1, OXR1, SDC2, GAS2, KCNH1, MRPS27, CREG1, DROSHA, APBB1IP, EIPR1, PSMF1, SLFN11, GLIS1, MORC1, MYO10, LATS2, GSG1L, ASPM, AP3B1, DENND2B, ATP11C, ZNF438, ABCB7, ZBTB16, MUSK, KIR3DL2, GNG7, SMARCA1, SETDB2, PRKCE, FOXK2, ASAP2, SLMAP, ZNF718, USP33, CD44, RGS12, PTPRO, PRRC1, ABCC9, STXB6, NSMAF, NLRP13, LNPEP, LIMD1, PEX14, SPRED2, RPS6KA3, PTPN2, PLXNA2, MCF2L, OR4F15, ATXN3, RIC3, ARHGEF7, ALG10B, ATP8A1, AMBRA1, KDM7A, OPRM1, FANCM, FANCA, SEMA3E, RPRD1B, TMM67, ALPL, ABHD17C, TMOD2, MSH2, ZNF397, LUC7L, RELL1, HIPK3, EPN2, CLSPN, BICRAL, AFG3L2, MOSMO, MNAT1, TMEM116, MDFIC, ANK3, HMG2, BCL11B, VPS41, DOCK5, F5, STK32A, LYPLA1, LINC01151, PLCE1, IL17RA, CRIM1, FUT9, PRR5L, VAV1, MYT1L, FBXO32, ZNF160, HLA-B, IQSEC1, CACNA1I, PDLIM5, BLM, NRK, MAGI3, INTS8, LIN54, ADCY10, STX12, BMP2, RC3H2, ATP9A, TRAK1, GFI1B, RIN3, BMP2K, SEMA3D, NETO2, POLR3A, NFATC2, TDRD7, SH3BP5, SLC23A2, ZNF106, MYOM1, TRAF3, ANKRD26, TTC21B, ZNF875, UIMC1, LRRFIP1, RAP1GAP, IKZF2, DRAXIN, ATF1, CCDC186, KCNH8, CGAS, GABRR2, CNKSR3, CASP5, VENTX, WDR12, KIF15, PRDM10, CUL1, BTAF1, ZNF618, FARP1, MOB1B, BBS4, MAPK8IP1, COL5A1, CFTR, ME2, TBC1D13, UBASH3A, AHDC1, MRPL13, KITLG, YLPM1, GTF2I, TADA2A, ZNF208, NMD3, AKAP10, PTPRE, TMTR2, ZNF608, SH3PXD2A, TBX20, SP110, AFAP1, WSB1, PRKCH, SLC12A1, TG, IL6R, ALS2, ZNF627, OR51E1, TFD1, DHRS11, HEMGN, KANK4, SNX25, TOX, PTPRB, PDE6A, SCN10A, USP7, ENPP3, PLAGL1, MESD, MOK, KIR2DL4, RALB, NPAS2, DENND2C, VCAM1, SEL1L, ARHGAP31, TTC37, ZNF169, KIF11, DTX1, ZBTB33, ADA2, FANCL, DPYSL5, ZNF44, SUPT16H, BAZ1A, CUL5, OR7A17, NEK6, HECTD1, SHROOM3, XRCC4, NMU, GAST, SNAI2, IGHV3-74, BID, SIAH2, RXRG, SP3, ERN2, ZNF879, MBTPS2, FLNB, TRIM58, TIAL1, ELF2, ZDHHC17, FYCO1, SH3GLB1, XKR5, SAMHD1, IFT81, ENPP1, TP53I11, TMEM225, KCNC1, CSF1, GHRH, BCL2L1, MIR3142HG, CTDP1, ASB4, DHRS3, SMAD5, TCERG1, SLC40A1, PRAME, CIDEA, LPGAT1, MED1, CDC14B, CFH, SCML2, PRAMEF2, PTH, PRKAA2, CSF2RB, SOHLH1, PHF20L1, ABHD2, VSTM2A, PLA2G4A, CAMLG, COX7A2L, ZBTB7C, TEAD1, ANP32B, YBX3, AIMP1, FYB2, PCID2, ZNF234, CIBAR1, PBLD, FICD, CADM1, PEG10, NET1, ELOC, ANLN, SLC1A7, VSX1, FSTL1, SVEP1, MADD, HCRT </p> |
|--|--|--|---------------------------------------------------------------------------------------------------------------------------------------------------------------------------------------------------------------------------------------------------------------------------------------------------------------------------------------------------------------------------------------------------------------------------------------------------------------------------------------------------------------------------------------------------------------------------------------------------------------------------------------------------------------------------------------------------------------------------------------------------------------------------------------------------------------------------------------------------------------------------------------------------------------------------------------------------------------------------------------------------------------------------------------------------------------------------------------------------------------------------------------------------------------------------------------------------------------------------------------------------------------------------------------------------------------------------------------------------------------------------------------------------------------------------------------------------------------------------------------------------------------------------------------------------------------------------------------------------------------------------------------------------------------------------------------------------------------------------------------------------------------------------------------------------------------------------------------------------------------------------------------------------------------------------------------------------------------------------------------------------------------------------------------------------------------------------------------------------------------------------------------------------------------------------------------------------------------------------------------------------------------------------------------------------------------------------------------------------------------------------------------------------------------------------------------------------------------------------------------------------------------------------------------------------------------------------------------------------------------------------------------------------------------------------------------------------------------------------------------------------------------------------------------------------------------------------------------------------------------------------------------------------------------------------------------------------------------------------------------------------------------------------------------------------------------------------------------------------------------------------------------------------------------------------------------------------------------------------------------------------------------------------------------------------------------------------------------------------------------------------------------------------------------------------------------------------------------------------------------------------------------------------------------------------------------------------------------------------------------------------------------------------------------------------------------------------------------------------------------------------------------------------------------------------------------------------------------------------------------------|

|            |                                  |                               |                                                                                                                                                                                                                                                                                                                                                                                                                                                                                                                                                                                                                                                                                                                                                                                                                                                                                                                                                                                                                                                                                                                                                                                                                                                                                                                                                                                                                                                                                                                                                                                                                                                                                                                                                                                                                                                                                                                                                                                                                                                                                                                                                                                                                                                                                                                                                                                                                                                                                                                                                                                                  |
|------------|----------------------------------|-------------------------------|--------------------------------------------------------------------------------------------------------------------------------------------------------------------------------------------------------------------------------------------------------------------------------------------------------------------------------------------------------------------------------------------------------------------------------------------------------------------------------------------------------------------------------------------------------------------------------------------------------------------------------------------------------------------------------------------------------------------------------------------------------------------------------------------------------------------------------------------------------------------------------------------------------------------------------------------------------------------------------------------------------------------------------------------------------------------------------------------------------------------------------------------------------------------------------------------------------------------------------------------------------------------------------------------------------------------------------------------------------------------------------------------------------------------------------------------------------------------------------------------------------------------------------------------------------------------------------------------------------------------------------------------------------------------------------------------------------------------------------------------------------------------------------------------------------------------------------------------------------------------------------------------------------------------------------------------------------------------------------------------------------------------------------------------------------------------------------------------------------------------------------------------------------------------------------------------------------------------------------------------------------------------------------------------------------------------------------------------------------------------------------------------------------------------------------------------------------------------------------------------------------------------------------------------------------------------------------------------------|
|            |                                  |                               | <p>R1, PATL1, ZNF287, ZNF449, PRSS2, CREBBP, MELTF, GORAB, SIAH3, TRPV5, NFKB1A, ABCC8, ZC3H15, RFC2, ZNF354C, ALX4, RTRAF, ZBTB21, NEDD9, OLFM4, ASS1, ADGRE3, SAR1A, PPP1R17, BTG3, ERLIN2, OTOP1, ZBTB49, EXOC1, HEPACAM, KRT6A, STOX2, AGO1, PDP2, GID8, ELL2, FAM189A2, NDFIP2, NR2C1, CMTM7, SLC6A11, GATAD1, MTPN, ABI1, ITGA4, OAZ2, PPME1, ZSCAN30, POU1F1, UBE2J2, TM9SF4, OR6C75, ASB2, CEP120, ZSCAN5C, CYFIP2, HNRNPM, ASCC2, OR13C9, ARID3B, RXRA, ADGRB1, WNT7A, NDFIP1, MAP3K4, TRIM43B, SERPINI2, TRIM43, FOXO6, ERI1, ZNF112, ATP6V1C2, C16ORF72, MAGEL2, OR10H2, PDE2A, LRRC2, SDCBP, DSG1, JPT2, NSMCE1, ZNF813, MLLT1, NCK1, FLVCR1, SCAF8, FGR, SNAP29, C2, IFNAR1, RNF8, CYTH4, INTS13, DNMT3L, LHX9, WNT2B, TNNT1, OCLN, POSTN, CD101, AKAP11, DTHD1, MVB12B, CD5L, ANKRD6, SCGN, ASCL3, FEZ2, INIP, LAMB1, MIR17HG, ZNF66, KIRREL1, PLCZ1, SLC9A5, FCRLA, DIDO1, GPR55, NSUN2, TNFSF11, ZNF705G, PPM1F, ARL13B, SH2D3C, PSME3IP1, TRNAU1AP, ZFYVE28, OPA3, TET1, ASB3, RAD9A, RP1L1, SPOPL, ZNF705D, IFT46, ITGA1, POR, ZNF850, ZNF235, NSG2, B9D1, PRDM15, SRGAP3, MACROH2A1, TOGARAM1, CSNK1G1, ZNF705B, ATP6V0D2, SERPINB2, ATG5, UNK, FLRT2, OR2T2, BTBD10, TMEM25, NUDT21, DDX6, PPP1R13B, RFX2, PKNOX2, SERPINB11</p>                                                                                                                                                                                                                                                                                                                                                                                                                                                                                                                                                                                                                                                                                                                                                                                                                                                                                                                                                                                                                                                                                                                                                                                                                                                                                                                                             |
| GO:0050789 | regulation of biological process | 2.2813341<br>245005094<br>e-8 | <p>WWC1, GARNL3, MTOR, SMOC1, NSG1, LRP12, TMPRSS2, PLCB1, SPOCK1, ABCA13, ANKS1B, ZNF536, KSR1, BRINP3, SGCD, CACNA2D3, CNTN4, KCNH5, ZFPM2, TENM4, RIPOR2, RP1, ERC1, ODAD2, KCNMA1, FBN1, CDH8, DDCDC1, RIMS1, PIK3C3, SPIRE1, TENM3, RARB, ENPEP, USH2A, MINAR1, CDC42EP3, RIMS2, ADGRE1, CDYL2, PJA2, BABAM2, ERBIN, RHPN2, PARVB, CACNG2, NEGR1, SUSD4, MAP3K9, MYO3B, RTN1, TCF4, ZNF573, NEK4, DOCK10, TSHZ2, EGFR, DENND1A, USP14, ANGPT1, CDK12, MACF1, PRKACB, NEK7, NCOR1, DOCK2, ZNF407, NEDD4, MAML2, NSMCE2, BTBD9, S OX6, PHACTR1, DKK2, DNAJC13, THRAP3, MAPKBP1, AOA, GABRB1, DGKI, C12ORF4, GRIA1, CAST, NEO1, CNTN6, SLC39A12, SLC8A3, TOM1L2, PAK1, EPHA7, CTNNA1, NCOA7, RALGPS1, SPEN, RAPGEF2, ADGRB3, RUNX2, ARSB, GABRA6, TAOX3, LDLRAD3, CPEB4, PRICKLE2, LDB2, PUM3, PATJ, RPTOR, EPB41L3, COL4A2, PPP1R12B, ADAM10, IL1R1, APBB2, KDM1B, CACNB2, KLHL13, MTUS1, STAU2, TMC1, USP18, SEMA5A, SYT1, VCL, ARHGAP44, NTF3, ACER2, PARP15, AURKA, CFDP1, PYGO1, SLC8A1, SSBP2, SRGAP2C, ANKRD31, TFAA2, SERPINA6, SRGAP2B, MAP4K4, BMPR1B, FMN2, HOMER2, RAB8B, PAK3, RFTN1, PDE1A, ZNF257, DIP2B, LARP1, ITPKB, RGS20, PDE10A, RAP1GDS1, HHAT, RNL, CLIC6, KICS2, SCP2, IFT57, INTS7, PRKCZ, SPOP, BTLA, GRB10, MCPH1, CNST, RGS9, DEFA3, MBNL2, ABCA5, SENP6, EBF2, YAP1, PPM1L, RIPK4, RABGAP1L, USP25, ALCAM, PLG, PAPP, PDGFD, ZNRF3, ITGBL1, UBE2O, GFRA1, SYCP1, NIPBL, EWSR1, MICU1, CORO2B, CARD18, CHD6, STK38, HRH4, SORCS3, MYL1L3, KANSL1, MBNL1, ATF6, ZNF684, CCNG2, TLK1, TPM1, LRRC38, CORIN, BIRC6, KLF15, PPARA, SNX30, KCNS3, PPP6R3, SYNJ1, ADAMTS3, ARAP2, PTPRK, ARHGEF12, TRERF1, SEMA3C, DAPK1, SLC24A4, SEC14L1, VPS13C, STK32B, PHC3, MAGI1, ALPK2, DNAH11, JARID2, SCN2A, DNAJC15, GATAD2B, CPE, EVC2, IL34, TANC1, ZNF846, MELK, BBS2, RANBP3L, OR4F6, NKX7, USP8, PIAS1, BLK, EBF1, TNFR, MXI1, OXR1, SDC2, GAS2, KCNH1, MRPS27, CREG1, DROSHA, APBB1IP, EIPR1, PSMF1, SLFN11, GLIS1, MORC1, MYO10, LATS2, GSG1L, ASPM, AP3B1, DENND2B, ATP11C, ZNF438, ABCB7, ZBTB16, MUSK, KIR3DL2, GNG7, SMARCA1, SETDB2, PRKCE, FOXK2, SLMAP, ZNF718, USP33, CD44, RGS12, PTPRO, PRRC1, ABCC9, STXBP6, NSMAF, NLRP13, LNPEP, LIMD1, PEX14, SPRED2, RPS6KA3, PTPN2, PLXNA2, MCF2L, OR4F15, ATXN3, RIC3, ARHGEF7, ALG10B, ATP8A1, AMBRA1, KDM7A, OPRM1, FANCM, FANCA, SEMA3E, RPRD1B, TMEM67, ALPL, ABHD17C, TMOD2, MSB2, ZNF397, LUC7L, RELL1, HIPK3, EPN2, CLSPN, BICRAL, AFG3L2, MOSMO, MNAT1, TMEM116, MDFIC, ANK3, HMGA2, BCL11B, VPS41, DOCK5, STK32A, LYPLA1, LINC01151, PLCE1, IL17RA, CRIM1, FUT9, PRR5L, VAV1, MYT1L, FBXO32, ZNF160, HLA-</p> |

|            |                                                      |                      |                                                                                                                                                                                                                                                                                                                                                                                                                                                                                                                                                                                                                                                                                                                                                                                                                                                                                                                                                                                                                                                                                                                                                                                                                                                                                                                                                                                                                                                                                                                                                                                                                                                                                                                                                                                                                                                                                                                                                                                                                                                                                                                                                                                                                                                                                                                                                                                                                                                                                                                                                                                              |
|------------|------------------------------------------------------|----------------------|----------------------------------------------------------------------------------------------------------------------------------------------------------------------------------------------------------------------------------------------------------------------------------------------------------------------------------------------------------------------------------------------------------------------------------------------------------------------------------------------------------------------------------------------------------------------------------------------------------------------------------------------------------------------------------------------------------------------------------------------------------------------------------------------------------------------------------------------------------------------------------------------------------------------------------------------------------------------------------------------------------------------------------------------------------------------------------------------------------------------------------------------------------------------------------------------------------------------------------------------------------------------------------------------------------------------------------------------------------------------------------------------------------------------------------------------------------------------------------------------------------------------------------------------------------------------------------------------------------------------------------------------------------------------------------------------------------------------------------------------------------------------------------------------------------------------------------------------------------------------------------------------------------------------------------------------------------------------------------------------------------------------------------------------------------------------------------------------------------------------------------------------------------------------------------------------------------------------------------------------------------------------------------------------------------------------------------------------------------------------------------------------------------------------------------------------------------------------------------------------------------------------------------------------------------------------------------------------|
|            |                                                      |                      | <p>B, IQSEC1, CACNA1I, PDLIM5, BLM, NRK, MAGI3, INTS8, LIN54, ADCY10, BMP2, RC3H2, ATP9A, TRAK1, GFI1B, RIN3, BMP2K, S EMA3D, NETO2, POLR3A, NFATC2, TDRD7, SH3BP5, SLC23A2, ZNF106, MYOM1, TRAF3, ANKRD26, TTC21B, ZNF875, UIMC1, LRRFIP1, RAP1GAP, IKZF2, DRAXIN, ATF1, KCNH8, CGAS, GABRR2, C NKSR3, CASP5, VENTX, WDR12, KIF15, PRDM10, CUL1, BTAF1, ZNF618, FARP1, MOB1B, BBS4, MAPK8IP1, COL5A1, CFTR, ME2, U BASH3A, AHDC1, MRPL13, KITLG, YLPM1, GTF2I, TADA2A, ZNF208, NMD3, AKAP10, PTPRE, MTMR2, ZNF608, TBX20, SP110, AFA P1, WSB1, PRKCH, TG, IL6R, ALS2, ZNF627, OR51E1, TFDP1, HEMGN, KANK4, SNX25, TOX, PTPRB, PDE6A, SCN10A, USP7, ENPP3, PLAGL1, MESD, MOK, KIR2DL4, RALB, NPAS2, VCAM1, SEL1L, A RHGAP31, TTC37, ZNF169, KIF11, DTX1, ZBTB33, ADA2, FANCL, DPYSL5, ZNF44, SUPT16H, BAZ1A, CUL5, OR7A17, NEK6, HECTD1, SHROOM3, NMU, GAST, SNAI2, IGHV3-74, BID, SIAH2, RXRG, SP3, ERN2, ZNF879, MBTPS2, FLNB, TRI M58, TIAL1, ELF2, ZDHHC17, FYCO1, SH3GLB1, SAMHD1, IFT81, ENPP1, TP53I11, TMEM225, KCNC1, CSF1, GHRH, BCL2L1, MIR3142HG, CTDP1, ASB4, DHRS3, SMAD5, TCERG1, SLC40A1, PRAME, CIDEC, LPGAT1, MED1, CDC14B, CFH, SCML2, PRAMEF25, PTH, PRKAA2, CSF2RB, SOHLH1, PHF20L1, ABHD2, VSTM2A, PLA2G4A, CAMLG, COX7A2L, ZBTB7C, TEAD1, ANP32B, YBX3, AIMP1, FYB2, PCID2, ZNF234, CIBAR1, PBLD, FICD, CADM1, PEG10, NET1, ELOC, ANLN, SLC1A7, VSX1, FSTL1, SVEP1, MADD, HCTR1, PATTL1, ZNF287, ZNF449, PRSS2, CREBBP, MELTF, GORAB, SIAH3, NFKBIA, ABCC8, ZC3H15, RFC2, ZNF354C, ALX4, RTRAF, ZBTB21, NEDD9, OLFM4, ASS1, ADGRE3, SAR1A, PPP1R17, BTG3, ERLIN2, OTOP1, ZBTB49, EXOC1, HEPACAM, KRT6A, STOX2, AGO1, GID8, ELL2, FAM189A2, NDFIP2, NR2C1, CMTM7, GATAD1, MTPN, ABI1, ITGA4, OAZ2, ZSCAN30, POU1F1, UBE2J2, TM9SF4, OR6C75, ASB2, CEP120, ZSCAN5C, CYFIP2, HNRNPM, ASCC2, OR13C9, ARID3B, RXRA, ADGRB1, WNT7A, NDFIP1, MAP3K4, TRIM43B, SERPINI2, TRIM43, FOXO6, ERI1, ZNF112, ATP6V1C2, C16ORF72, MAGEL2, OR10H2, PDE2A, LRRC2, SDCBP, JPT2, NSMCE1, ZNF813, MLLT1, NCK1, FLVCR1, SCAF8, FGR, C2, IFNAR1, RNF8, CYTH4, INTS13, DNMT3L, LHX9, WNT2B, TNNT1, OCLN, POSTN, CD101, AKAP11, DTHD1, MVB12B, CD5L, ANKRD6, SCGN, ASCL3, FEZ2, INIP, LAMB1, MIR17HG, ZNF66, KIRREL1, PLCZ1, FCRLA, DIDO1, GPR55, NSUN2, TNFSF11, ZNF705G, PPM1F, ARL13B, SH2D3C, PSME3IP1, TRNAU1AP, ZFYVE28, OPA3, TET1, ASB3, RAD9A, RP1L1, SPOPL, ZNF705D, ITGA1, POR, ZNF850, ZNF235, NSG2, B9D1, PRDM15, SRGAP3, MACROH2A1, TOGARAM1, CSNK1G1, ZNF705B, ATP6V0D2, SERPINB2, ATG5, UNK, FLRT2, OR2T2, BTBD10, TMEM25, NUDT21, DDX6, PPP1R13B, RFX2, PKNOX2, SERPINB11</p> |
| GO:0120036 | plasma membrane bounded cell projection organization | 9.626615646767171e-8 | <p>LRRC49, MTOR, LRP12, SPOCK1, CNTN4, RIPOR2, RP1, ODAD2, RIMS1, TENM3, SPAG16, MINAR1, CDC42EP3, RIMS2, PARVB, NEG R1, MYO3B, DOCK10, MACF1, NEDD4, ARMC2, PHACTR1, NEO1, CNTN6, SLC39A12, PAK1, EPHA7, RAPGEF2, ADGRB3, ARSB, TAOK3, LRGUK, EPB41L3, STAU2, SEMA5A, SYT1, VCL, ARHGAP44, NTF3, AURKA, SRGAP2C, MAP4K4, BMPR1B, PAK3, DIP2B, IFT57, PRKCZ, KLHL1, YAP1, ALCAM, ABLIM1, GFRA1, TPM1, SEMA3C, TANC1, BBS2, BLK, TNFR, SDC2, DNAH5, MYO10, USP33, CD44, PTPRO, PLXNA2, ARHGEF7, SEMA3E, TMEM67, ATL1, AFG3L2, CFAP61, ANK3, BCL11B, PLCE1, FUT9, IQSEC1, PDLIM5, NRK, DNAL1, SEMA3D, SLC23A2, TTC21B, B4GALT6, TSPAN2, RAP1GAP, DRAXIN, DNAH8, ATF1, DAW1, FARP1, BBS4, MTMR2, ALS2, TOX, CFAP74, DPYSL5, ZDHHC17, IFT81, FAM149B1, CDC14B, CIBAR1, ANLN, GORAB, NEDD9, ABI1, ITGA4, CEP120, CYFIP2, ADGRB1, WNT7A, FOXO6, SDCBP, NCK1, SNAP29, LHX9, OCLN, FEZ2, LAMB1, ARL13B, RP1L1, IFT46, ITGA1, B9D1, TOGARAM1, ATG5, FLRT2, RFX2, CCDC141</p>                                                                                                                                                                                                                                                                                                                                                                                                                                                                                                                                                                                                                                                                                                                                                                                                                                                                                                                                                                                                                                                                                                                                                                                                                                                                                                                                                                                                                                                                                                                                                                                                                          |
| GO:0030030 | cell projection organization                         | 1.232228669096611e-7 | <p>LRRC49, MTOR, LRP12, SPOCK1, CNTN4, RIPOR2, RP1, ODAD2, RIMS1, TENM3, SPAG16, MINAR1, CDC42EP3, RIMS2, PARVB, NEG R1, MYO3B, DOCK10, MACF1, NEDD4, ARMC2, PHACTR1, NEO1, CNTN6, SLC39A12, PAK1, EPHA7, RAPGEF2, ADGRB3, DEUP1, ARSB</p>                                                                                                                                                                                                                                                                                                                                                                                                                                                                                                                                                                                                                                                                                                                                                                                                                                                                                                                                                                                                                                                                                                                                                                                                                                                                                                                                                                                                                                                                                                                                                                                                                                                                                                                                                                                                                                                                                                                                                                                                                                                                                                                                                                                                                                                                                                                                                   |



|            |                                    |                       |                                                                                                                                                                                                                                                                                                                                                                                                                                                                                                                                                                                                                                                                                                                                                                                                                                                                                                                                                                                                                                                                                                                                                                                                                                                                                                                                                                                                                                                                                                                                                                                                                                                                                                                                                                                                                                                                                        |
|------------|------------------------------------|-----------------------|----------------------------------------------------------------------------------------------------------------------------------------------------------------------------------------------------------------------------------------------------------------------------------------------------------------------------------------------------------------------------------------------------------------------------------------------------------------------------------------------------------------------------------------------------------------------------------------------------------------------------------------------------------------------------------------------------------------------------------------------------------------------------------------------------------------------------------------------------------------------------------------------------------------------------------------------------------------------------------------------------------------------------------------------------------------------------------------------------------------------------------------------------------------------------------------------------------------------------------------------------------------------------------------------------------------------------------------------------------------------------------------------------------------------------------------------------------------------------------------------------------------------------------------------------------------------------------------------------------------------------------------------------------------------------------------------------------------------------------------------------------------------------------------------------------------------------------------------------------------------------------------|
|            | on                                 |                       | ,TAOK3,LRGUK,EPB41L3,STAU2,SEMA5A,SYT1,VCL,ARHGAP44,NTF3,AURKA,SRGAP2C,MAP4K4,BMPR1B,RAB8B,PAK3,DI P2B,IFT57,PRKCZ,KLHL1,YAP1,ALCAM,ABLM1,GFRA1,TPM1,SEMA3C,TANC1,BBS2,BLK,TNR,SDC2,DNAH5,MYO10,USP33,CD44,PTPRO,PLXNA2,ARHGEF7,SEMA3E,TMEM67,ATL1,AF G3L2,CFAP61,ANK3,BCL11B,PLCE1,FUT9,IQSEC1,PDLIM5,NRK,DNAL1,SEMA3D,SLC23A2,TTC21B,B4GALT6,TSPAN2,RA P1GAP,DRAXIN,DNAH8,ATF1,DAW1,FARP1,BBS4,MTMR2,ALS2,TOX,CFAP74,DPYSL5,ZDHHC17,IFT81,FAM149B1,CDC14B,CIBAR1,ANLN,GORAB,NEDD9,ABI1,ITGA4,CEP120,CYFIP2,ADGRB1,WNT7A,FOXO6,SDCBP,NCK1,SNAP29,LHX9,OCN,FEZ2,LAMB1,ARL13B,RP1L1,IFT46,ITGA1,B9D1,TOGARAM1,ATG5,FLRT2,RFX2,CCDC141                                                                                                                                                                                                                                                                                                                                                                                                                                                                                                                                                                                                                                                                                                                                                                                                                                                                                                                                                                                                                                                                                                                                                                                                                                                   |
| GO:0007275 | multicellular organism development | 4.2370911610607367e-7 | MTOR,SMOC1,LRP12,PLCB1,NEBL,SPOCK1,ZNF536,BRINP3,SGCD,CNTN4,ZFPM2,TENM4,RIPOR2,RP1,ODAD2,FBN1,RIMS1,TENM3,RARB,NAV2,ENPEP,USH2A,MINAR1,RIMS2,ASTN1,NEGR1,MYO3B,RTN1,TCF4,DOCK10,EGFR,ANGPT1,MACF1,PRKACB,NEDD4,CRB1,SOX6,PHACTR1,DKK2,GABRB1,NEO1,CNTN6,SLC39A12,SLC8A3,PAK1,EPHA7,SPEN,RAPGEF2,ADGRB3,RUNX2,ARSB,CPS1,TAOK3,LDB2,EPB41L3,COL4A2,ADAM10,STAU2,TMC1,SEMA5A,SYT1,VCL,ARHGAP44,NTF3,AURKA,PYGO1,SLC8A1,SRGAP2C,SRGAP2B,MAP4K4,BMPR1B,PAK3,TTLL7,DIP2B,ITPKB,CHST8,IFT57,PRKCZ,KLHL1,MCPH1,ZSWIM6,YAP1,CADM2,ALCAM,PLG,PDGFD,ZNRF3,GFRA1,NIPBL,MYLK3,MBNL1,ATF6,TPM1,ANKRD11,BIRC6,KLF15,PPARA,SYNJ1,ADAMTS3,SF3B6,SEMA3C,SLC24A4,ALPK2,DNAH11,JARID2,SCN2A,CPE,IL34,BBS2,RANBP3L,LDB3,BLK,TNR,XIRP2,SDC2,GAS2,DROSHA,TTL5,DNAH5,GALC,LATS2,ASPM,AP3B1,ATP11C,ZBTB16,MUSK,SETDB2,USP33,CD44,PTPRO,ALPK3,SPRED2,RPS6KA3,NHS,PTPN2,PLXNA2,ATXN3,ST8SIA6,ARHGEF7,AMBRA1,KDM7A,OPRM1,FANCA,SEMA3E,ALPL,TMOD2,MSH2,ATL1,EPN2,AFG3L2,MOSMO,MNAT1,ANK3,XYLT1,HMGA2,BCL11B,AK8,PLCE1,CRIM1,FUT9,MYT1L,HLA-B,IQSEC1,PDLIM5,NRK,SLC10A7,BMP2,RC3H2,TRAK1,GF11B,BMP2K,RNF38,SEMA3D,NFATC2,TDRD7,SLC23A2,TTC21B,B4GALT6,TSPAN2,RAP1GAP,DRAXIN,ATF1,CASP5,DAW1,FARP1,BBS4,COL5A1,CFTR,AHDC1,KITLG,GTTF2I,TADA2A,MTMR2,SH3PXD2A,TBX20,LGI2,PRKCH,TG,IL6R,ALS2,TOX,PTPRB,PDE6A,NPAS2,YIPF6,VCAM1,LRRIG1,DTX1,DPYSL5,HECTD1,SHROOM3,XRCC4,SNAI2,SIH2,RXRG,SP3,MBTPS2,ZDHHC17,SAMHD1,ENPP1,KCNC1,CSF1,GHRH,BCL2L1,CTDP1,ASB4,DHRS3,SMAD5,SYNJ2,SLC40A1,MED1,FAT1,PTH,TEAD1,ANP32B,YBX3,AIMP1,PCID2,CIBAR1,CADM1,VXS1,BPNT1,SVEP1,CREBBP,GORAB,SIH3,NFKBIA,ABCC8,ALX4,NEDD9,ASS1,PPP1R17,OTOP1,STOX2,AGO1,SLC6A11,MTPN,ABI1,ITGA4,POU1F1,ASB2,CEP120,CYFIP2,ST8SIA4,FXR,ADGRB1,WNT7A,NDFIP1,MAP3K4,FOXO6,PDE2A,SDCBP,NCK1,FLVCR1,FGR,RNF8,KIAA0319L,DNMT3L,LHX9,WNT2B,TNNI1,CD101,FEZ2,LAMB1,GPR55,NSUN2,TNFSF11,ARL13B,UGP2,TET1,RP1L1,ITGA1,POR,B9D1,MACROH2A1,ATG5,UNK,FLRT2,DDX6,CCDC141 |
| GO:0050896 | response to stimulus               | 4.567510757295763e-7  | WWC1,GARNL3,MTOR,NSG1,LRP12,PLCB1,ANKS1B,ZNF536,KSR1,BRINP3,SGCD,CNTN4,PIEZO2,TENM4,RIPOR2,RP1,ERC1,KCNMA1,ARPP21,FBN1,F13A1,CDH8,DCDC1,RIMS1,PIK3C3,SPIRE1,TENM3,RARB,ENPEP,USH2A,MINAR1,CDC42EP3,RIMS2,ADGRE1,PJA2,BABAM2,ERBIN,RHPN2,CACNG2,GLYAT,SUSD4,MAP3K9,MYO3B,NEK4,DOCK10,EGFR,DENND1A,USP14,ANGPT1,MACF1,PRKACB,NEK7,NCOR1,HMCN2,DOCK2,UGT3A2,NEDD4,MAML2,CRB1,NSMCE2,SOX6,PSMB2,B3GALT5,DKK2,MAPKBP1,AOAH,NAT1,GABRB1,DGKI,C12ORF4,GRIA1,NEO1,CNTN6,SLC39A12,SLC8A3,TOM1L2,PAK1,EPHA7,CTNNA1,NCOA7,GRAMD1B,RALGPS1,SPEN,RAPGEF2,ADGRB3,RUNX2,ARSB,GABRA6,CPS1,TAOK3,CPEB4,BCKDHB,PRICKLE2,PATJ,PTOR,COL4A2,PPP1R12B,ADAM10,IL1R1,APBB2,MUS1,STAU2,TMC1,USP18,SEMA5A,SYT1,VCL,ARHGAP44,NTF3,ACER2,AURKA,PYGO1,SLC8A1,TAFA2,MAP4K4,BMPR1B,FMN2,HOM                                                                                                                                                                                                                                                                                                                                                                                                                                                                                                                                                                                                                                                                                                                                                                                                                                                                                                                                                                                                                                                                                                                           |

|            |                    |                      |                                                                                                                                                                                                                                                                                                                                                                                                                                                                                                                                                                                                                                                                                                                                                                                                                                                                                                                                                                                                                                                                                                                                                                                                                                                                                                                                                                                                                                                                                                                                                                                                                                                                                                                                                                                                                                                                                                                                                                                                                                                                                                                                                                                                                                                                                                                                                                                                                                                                                                                                                                                         |
|------------|--------------------|----------------------|-----------------------------------------------------------------------------------------------------------------------------------------------------------------------------------------------------------------------------------------------------------------------------------------------------------------------------------------------------------------------------------------------------------------------------------------------------------------------------------------------------------------------------------------------------------------------------------------------------------------------------------------------------------------------------------------------------------------------------------------------------------------------------------------------------------------------------------------------------------------------------------------------------------------------------------------------------------------------------------------------------------------------------------------------------------------------------------------------------------------------------------------------------------------------------------------------------------------------------------------------------------------------------------------------------------------------------------------------------------------------------------------------------------------------------------------------------------------------------------------------------------------------------------------------------------------------------------------------------------------------------------------------------------------------------------------------------------------------------------------------------------------------------------------------------------------------------------------------------------------------------------------------------------------------------------------------------------------------------------------------------------------------------------------------------------------------------------------------------------------------------------------------------------------------------------------------------------------------------------------------------------------------------------------------------------------------------------------------------------------------------------------------------------------------------------------------------------------------------------------------------------------------------------------------------------------------------------------|
|            |                    |                      | <p>ER2,HADHB,PAK3,RFTN1,PDE1A,LARP1,ITPKB,RGS20,PDE10A,RAP1GDS1,HHAT,RNLS,KICS2,CUBN,IFT57,INTS7,SUSD6,PRKCZ,BTLA,GRB10,MCPH1,FER1L6,RGS9,DEFA3,YAP1,PPM1L,ABCD3,SGTB,USP25,ALCAM,PLG,PAPPA,PDGFD,ZNRF3,ITGBL1,UBE20,GFRA1,SYCP1,NIPBL,MICU1,CORO2B,CARD18,CHD6,STK38,HRH4,SORCS3,MYLK3,ATF6,TLK1,TPM1,BIRC6,KLF15,PPARA,SYNJ1,ADAMTS3,ARAP2,RSRC1,PTPRK,ARHGEF12,TRERF1,SEMA3C,DAPK1,SLC24A4,SEC14L1,VPS13C,STK32B,MAGI1,ALPK2,JARID2,SCN2A,DNAJC15,CPE,EVC2,IL34,TANC1,MELK,BBS2,OR4F6,NKG7,USP8,PIAS1,BLK,TNR,OXR1,GAS2,KCNH1,DROSHA,APBB1IP,SLFN11,MORC1,MYO10,LATS2,GSG1L,ASPM,AP3B1,DENND2B,MUSK,KIR3DL2,GNG7,SMARCAD1,PRKCE,FOXK2,USP33,CD44,RGS12,PTPRO,ABCC9,NSMAF,NLRP13,LNPEP,LIMD1,SPRED2,RPS6KA3,PTPN2,PLXNA2,MCF2L,OR4F15,ATXN3,ARHGEF7,AMBRA1,RFTN2,OPRM1,BIN2,FANCM,FANCA,CYBRD1,CNNM4,SEMA3E,TMEM67,ALPL,TMOD2,MSH2,IGLV2-14,RELL1,HIPK3,EPN2,CD163,CLSPN,AFG3L2,MOSMO,MNAT1,TMEM116,MDFIC,ANK3,HMGA2,BCL11B,VPS41,DOCK5,F5,STK32A,PLCE1,IL17RA,CRIM1,PRR5L,VAV1,FBXO32,HLA-B,IQSEC1,CACNA1I,BLM,NRK,MAGI3,ADCY10,BMP2,RC3H2,RIN3,BMP2K,SEMA3D,NETO2,POLR3A,NFATC2,SH3BP5,SLC23A2,ZNF106,MYOM1,TRAF3,PRG4,TTC21B,UIMC1,TSPAN2,RAP1GAP,DRAXIN,ATF1,CCDC186,CGAS,GABRR2,CNKSRR3,CASP5,WDR12,CUL1,MOB1B,BBS4,MAPK8IP1,COL5A1,CFTR,UBASH3A,KITLG,AKAP10,PTPRE,MTMR2,TBX20,AFAP1,WSB1,TRPM6,PRKCH,TG,IL6R,ALS2,OR51E1,SNX25,OSCP1,PDE6A,MAP7,USP7,ENPP3,HAAO,MESD,MOK,KIR2DL4,RALB,NPAS2,VCAM1,SEL1L,ARHGAP31,GSTA3,DTX1,ZBTB33,ADA2,FANCL,DYSL5,SLC13A5,SUPT16H,CUL5,OR7A17,NEK6,SHROOM3,XRCC4,NMU,GAST,SNAI2,IGHV3-74,BID,SIAH2,RXRG,ERN2,MBTPS2,FLNB,TRIM58,TIAL1,ZDHHC17,SH3GLB1,SAMHD1,IFT81,ENPP1,KCNC1,CSF1,GHRH,BCL2L1,CTDP1,ASB4,DHRS3,SMAD5,SLC40A1,PRAME,HADHA,MED1,IPCEF1,CDC14B,CFH,PTH,PRKAA2,CSF2RB,TRAV8-6,ABHD2,VSTM2A,PLA2G4A,REG4,CAMLG,TEAD1,YBX3,AIMP1,FYB2,PCID2,CIBAR1,PBLD,FICD,CADM1,PEG10,NET1,SLC1A7,VSX1,FSTL1,SVEP1,MADD,HCRTR1,PRSS2,CREBBP,GORAB,NFKBIA,ABCC8,MT1HL1,ZC3H15,RFC2,NEDD9,OLFM4,ASS1,ADGRE3,PPP1R17,ERLIN2,OTOP1,EXOC1,KRT6A,GID8,FAM189A2,NDFIP2,NR2C1,CMTM7,SLC6A11,MARCHF6,MTFN,ABI1,ITGA4,TOP3A,UBE2J2,TM9SF4,OR6C75,ASB2,CYFIP2,HNRNPM,ACACA,ASCC2,OR13C9,RXRA,ADGRB1,WNT7A,NDFIP1,MAP3K4,TRIM43B,TRIM43,ATP6V1C2,C16ORF72,OR10H2,PDE2A,LRRC2,SDCBP,DSG1,JPT2,NSMCE1,NCK1,FGR,C2,IFNAR1,RNF8,CYTH4,LHX9,WNT2B,TNNI1,OCNL,POSTN,CD101,AKAP11,DTHD1,MVB12B,ERP27,CD5L,ANKRD6,YEZ2,INIP,LAMB1,SCARA5,PLCZ1,FCRLA,DIDO1,GPR55,NSUN2,TNFSF11,PPM1F,ARL13B,SH2D3C,IGLV4-3,ZFYVE28,OPA3,TET1,ASB3,RAD9A,RP1L1,ITGA1,POR,NSG2,B9D1,PRDM15,SRGAP3,MACROH2A1,CSNK1G1,SERPINB2,ATG5,FLRT2,OR2T2,TMEM25,PPP1R13B,RFX2,CCDC141,MTRX</p> |
| GO:0048731 | system development | 5.943159123485349e-7 | <p>MTOR,SMOC1,LRP12,PLCB1,NEBL,SPOCK1,ZNF536,BRINP3,SGCD,CNTN4,ZFPM2,TENM4,RIPOR2,RP1,ODAD2,FBN1,RIMS1,TENM3,RARB,NAV2,ENPEP,USH2A,MINAR1,RIMS2,ASTN1,NEGR1,RTN1,TCF4,DOCK10,EGFR,ANGPT1,MACF1,PRKACB,NEDD4,CRB1,SOX6,PHACTR1,GABRB1,NEO1,CNTN6,SLC39A12,SLC8A3,PAK1,EPHA7,SPEN,RAPGEF2,ADGRB3,RUNX2,ARSB,CPS1,TAOK3,LDB2,EPB41L3,COL4A2,ADAM10,STAU2,TMC1,SEMA5A,SYT1,VCL,ARHGAP44,NTF3,AURKA,PYGO1,SLC8A1,SRGAP2C,SRGAP2B,MAP4K4,BMPR1B,PAK3,TTL7,DIP2B,CYST8,IFT57,PRKCZ,KLHL1,MCPH1,ZSWIM6,YAP1,CADM2,ALCAM,PLG,PDGFD,GFRA1,NIPBL,MYLK3,MBNL1,ATF6,TPM1,ANKRD11,KLF15,PPARA,SYNJ1,SEMA3C,SLC24A4,ALPK2,DNAH11,JARID2,SCN2A,CPE,IL34,BBS2,RANBP3L,LDB3,BLK,T</p>                                                                                                                                                                                                                                                                                                                                                                                                                                                                                                                                                                                                                                                                                                                                                                                                                                                                                                                                                                                                                                                                                                                                                                                                                                                                                                                                                                                                                                                                                                                                                                                                                                                                                                                                                                                                                                                                                                                     |

|            |                               |                      |                                                                                                                                                                                                                                                                                                                                                                                                                                                                                                                                                                                                                                                                                                                                                                                                                                                                                                                                                                                                                                                                                                                                                                                                                                                                                                                                                                                                                                                                                                                                                                                                                                                                                                                                                                                         |
|------------|-------------------------------|----------------------|-----------------------------------------------------------------------------------------------------------------------------------------------------------------------------------------------------------------------------------------------------------------------------------------------------------------------------------------------------------------------------------------------------------------------------------------------------------------------------------------------------------------------------------------------------------------------------------------------------------------------------------------------------------------------------------------------------------------------------------------------------------------------------------------------------------------------------------------------------------------------------------------------------------------------------------------------------------------------------------------------------------------------------------------------------------------------------------------------------------------------------------------------------------------------------------------------------------------------------------------------------------------------------------------------------------------------------------------------------------------------------------------------------------------------------------------------------------------------------------------------------------------------------------------------------------------------------------------------------------------------------------------------------------------------------------------------------------------------------------------------------------------------------------------|
|            |                               |                      | <p>NR,XIRP2,SDC2,GAS2,TTL5,DNAH5,GALC,ASPM,AP3B1,ZBTB16,MUSK,SETDB2,USP33,CD44,PTPRO,ALPK3,SPRED2,RPS6KA3,NHS,PLXNA2,ATXN3,ARHGEF7,AMBRA1,KDM7A,OPRM1,FANCA,SEMA3E,ALPL,TMOD2,MSH2,ATL1,EPN2,AFG3L2,MO SMO,MNAT1,ANK3,XYL1,HMGA2,BCL11B,AK8,PLCE1,CRIM1,FUT9,MYT1L,HLA-</p> <p>B,IQSEC1,PDLIM5,NRK,SLC10A7,BMP2,RC3H2,TRAK1,RNF38,SEMA3D,NFATC2,TDRD7,SLC23A2,TTC21B,B4GALT6,TSPAN2,RAP1GAP,DRAXIN,ATF1,CASP5,DAW1,FARP1,BBS4,COL5A1,KITLG,GT2I,MTMR2,TBX20,LGI2,PRKCH,TG,IL6R,ALS2,TOX,PTPRB,PDE6A,NPAS2,YIPF6,VCAM1,LRIG1,DTX1,DYSL5,HECTD1,SHROOM3,XRCC4,SNAI2,RXRG,SP3,MBTPS2,ZDHC17,SAMHD1,KCNC1,CSF1,GHRH,BCL2L1,CTDP1,ASB4,DHRS3,SMAD5,SYNJ2,SLC40A1,MED1,FAT1,PTH,ANP32B,YBX3,AIMP1,PCID2,CADM1,VSX1,BPNT1,SVEP1,GORAB,ABCC8,ALX4,ASS1,PPP1R17,AGO1,SLC6A11,MTPN,ABI1,ITGA4,POU1F1,ASB2,CEP120,CYFIP2,ST8SIA4,ADGRB1,WNT7A,NDFIP1,FOXO6,PDE2A,SDCBP,NCK1,FLVCR1,FGR,RNF8,KIAA0319L,LHX9,WNT2B,TNNI1,FEZ2,LAMB1,TNFSF11,ARL13B,UGP2,RP1L1,ITGA1,POR,B9D1,ATG5,UNK,FLRT2,DDX6,CCDC141</p>                                                                                                                                                                                                                                                                                                                                                                                                                                                                                                                                                                                                                                                                                                                                                                                         |
| GO:0030154 | cell differentiation          | 6.962333610905045e-7 | <p>MTOR,SMOC1,LRP12,PLCB1,NEBL,SPOCK1,ZNF536,BRINP3,SGCD,CNTN4,ZFPM2,TENM4,RIPOR2,RP1,FBN1,RIMS1,TENM3,RARB,NAV2,SPAG16,USH2A,MINAR1,RIMS2,ASTN1,NEGR1,RTN1,TCF4,OCA2,DOCK10,EGFR,ANGPT1,CDK12,MACF1,DOCK2,NEDD4,CRB1,SOX6,ARMC2,PHACTR1,DNAJC13,GABRB1,NEO1,CNTN6,SLC39A12,SLC8A3,PAK1,EPA7,SPEN,RAPGEF2,ADGRB3,DEUP1,RUNX2,ARSB,CPS1,TAOK3,LRGUK,EPB41L3,COL4A2,STAU2,TMC1,SEMA5A,SYT1,VCL,ARHGAP44,NTF3,AURKA,PYGO1,SLC8A1,SRGAP2C,MAP4K4,BMPR1B,FMN2,PAK3,TTL7,DIP2B,ITPKB,PRKCZ,KLHL1,ZSWIM6,ABCA5,EBF2,YAP1,ALCAM,PLG,GFRA1,SYCP1,NIPBL,RNF17,MYLK3,MBNL1,TPM1,KLF15,PPARA,SYNJ1,SEMA3C,ALPK2,JARID2,GATAD2B,IL34,TANC1,MELK,BBS2,SLC9C1,RANBP3L,LDB3,PIAS1,BLK,TNR,SDC2,KCNH1,DROSHA,GLIS1,MORC1,LATS2,ASPM,AP3B1,ATP11C,ZBTB16,MUSK,USP33,PTPRO,ALPK3,LIMD1,SPRED2,RPS6KA3,NHS,PTPN2,PLXNA2,ARHGEF7,AMBRA1,OPRM1,FANCA,SEMA3E,ALPL,TMOD2,MSH2,ATL1,BICRAL,AFG3L2,MOSMO,ANK3,HMGA2,BCL11B,DOCK5,CRIM1,FUT9,AV1,MYT1L,ZNF160,HLA-</p> <p>B,IQSEC1,PDLIM5,NRK,BMP2,RC3H2,TRAK1,GFI1B,SEMA3D,NFATC2,TDRD7,SLC23A2,ANKRD26,TTC21B,B4GALT6,TSPAN2,RAP1GAP,DRAXIN,ATF1,NHSL1,FARP1,BBS4,COL5A1,CFTR,KITLG,MTMR2,SH3PXD2A,TBX20,PRKCH,IL6R,ALS2,HEMGN,TOX,PTPRB,TBATA,YIPF6,VCAM1,DTX1,DYSL5,HECTD1,SHROOM3,SNAI2,RXRG,SP3,FLNB,TRIM58,TIAL1,ELF2,ZDHC17,SLC22A14,KRT6B,IFT81,ENPP1,CSF1,BCL2L1,SPATA48,CTDP1,ASB4,SMAD5,PRAME,CABYR,MED1,FAT1,PRAMEF25,PTH,SDF4,SOHLH1,ABHD2,VSTM2A,ZBTB7C,ANP32B,YBX3,PCID2,CADM1,PEG10,ANLN,VSX1,FSTL1,ARL11,NFKBIA,ABCC8,NEDD9,KRT6A,NR2C1,CMTM7,MTPN,ABI1,ITGA4,BCAP29,ASB2,CEP120,DHTKD1,CYFIP2,KRT85,NKRA,ADGRB1,WNT7A,NDFIP1,MAP3K4,FOXO6,PDE2A,SDCBP,NCK1,FLVCR1,FGR,SPRR2D,RNF8,KIAA0319L,DNMT3L,LHX9,WNT2B,CD101,FEZ2,LAMB1,FCRLA,GPR55,NSUN2,TNFSF11,ARL13B,TET1,RP1L1,ITGA1,POR,B9D1,MACROH2A1,ATG5,UNK,FLRT2,NUDT21,DDX6,RFX2,CCDC141</p> |
| GO:0051716 | cellular response to stimulus | 7.211684044997644e-7 | <p>WWC1,GARNL3,MTOR,NSG1,LRP12,PLCB1,ANKS1B,ZNF536,KSR1,BRINP3,SGCD,PIEZO2,TENM4,RIPOR2,RP1,ERC1,ARPP21,FBN1,DCDC1,RIMS1,PIK3C3,SPIRE1,TENM3,RARB,ENPEP,MINAR1,CDC42EP3,RIMS2,ADGRE1,PJA2,BABAM2,ERBIN,RHPN2,CACNG2,GLYAT,MAP3K9,NEK4,DOCK10,EGFR,DENND1A,USP14,ANGPT1,MACF1,PRKACB,NEK7,NCOR1,DOCK2,UGT3A2,NEDD4,MAML2,CRB1,NSMCE2,DKK2,MAPKBP1,NAT1,GABRB1,DGKI,GRI1A1,NEO1,CNTN6,SLC39A12,SLC8A3,TOM1L2,PAK1,EPA7,CTNNAL1,NCOA7,GRAMD1B,RALGPS1,SPEN,RAPG</p>                                                                                                                                                                                                                                                                                                                                                                                                                                                                                                                                                                                                                                                                                                                                                                                                                                                                                                                                                                                                                                                                                                                                                                                                                                                                                                                        |

|            |                                |                      |                                                                                                                                                                                                                                                                                                                                                                                                                                                                                                                                                                                                                                                                                                                                                                                                                                                                                                                                                                                                                                                                                                                                                                                                                                                                                                                                                                                                                                                                                                                                                                                                                                                                                                                                                                                                                                                                                                                                                                                                                                                                                                                                                                                                                                                                                                                                                                                                       |
|------------|--------------------------------|----------------------|-------------------------------------------------------------------------------------------------------------------------------------------------------------------------------------------------------------------------------------------------------------------------------------------------------------------------------------------------------------------------------------------------------------------------------------------------------------------------------------------------------------------------------------------------------------------------------------------------------------------------------------------------------------------------------------------------------------------------------------------------------------------------------------------------------------------------------------------------------------------------------------------------------------------------------------------------------------------------------------------------------------------------------------------------------------------------------------------------------------------------------------------------------------------------------------------------------------------------------------------------------------------------------------------------------------------------------------------------------------------------------------------------------------------------------------------------------------------------------------------------------------------------------------------------------------------------------------------------------------------------------------------------------------------------------------------------------------------------------------------------------------------------------------------------------------------------------------------------------------------------------------------------------------------------------------------------------------------------------------------------------------------------------------------------------------------------------------------------------------------------------------------------------------------------------------------------------------------------------------------------------------------------------------------------------------------------------------------------------------------------------------------------------|
|            |                                |                      | <p>EF2,ADGRB3,RUNX2,GABRA6,CPS1,TAOK3,CPEB4,PRICKLE2,PATJ,RPTOR,COL4A2,PPP1R12B,ADAM10,IL1R1,APBB2,MTUS1,STAU2,USP18,SEMA5A,SYT1,ARHGAP44,NTF3,ACER2,AURKA,PYGO1,SLC8A1,TAF1A,MAP4K4,BMPR1B,FMN2,HOMER2,HADHB,PAK3,RFTN1,PDE1A,LARP1,ITPKB,RGS20,PDE10A,RAP1GDS1,HHAT,KICS2,IFT57,INTS7,SUSD6,PRKCZ,BTLA,GRB10,RGS9,DEFA3,YAP1,PPM1L,SGTB,USP25,ALCAM,PAPP A,PDGFD,ZNRF3,ITGBL1,UBE2O,GFRA1,SYCP1,NIPBL,MICU1,CORO2B,CHD6,STK38,HRH4,SORCS3,MYLK3,ATF6,TLK1,TPM1,BIRC6,KLF15,PPARA,ADAMTS3,ARAP2,PTPRK,ARHGEF12,TRERF1,SEMA3C,DAPK1,SLC24A4,SEC14L1,VPS13C,STK32B,MAGI1,ALPK2,JARID2,SCN2A,DNAJC15,CPE,EVC2,IL34,MELK,BBS2,OR4F6,NKG7,USP8,PIAS1,BLK,TNR,OXR1,GAS2,KCNH1,APBB1P,SLFN11,MYO10,LATS2,GSG1L,ASPM,AP3B1,DENND2B,MUSK,GNG7,SMARCA1,PRKCE,USP33,CD44,RGS12,PTPRO,NSMAF,LNPEP,LIMD1,SPRED2,RPS6KA3,PTPN2,PLXNA2,MCF2L,OR4F15,ATXN3,ARHGEF7,AMBRA1,OPRM1,BI N2,FANCM,FANCA,SEMA3E,TMEM67,ALPL,TMOD2,MSH2,BELL1,HIPK3,EPN2,CLSPN,MOSMO,MNAT1,TMEM116,MDFIC,ANK3,HMGA2,VPS41,DOCK5,STK32A,PLCE1,IL17RA,CRIM1,PRR5L,VAV1,FBXO32,IQSEC1,CACNA1I,BLM,NRK,MAGI3,ADCY10,BMP2,RC3H2,RIN3,BMP2K,SEMA3D,NETO2,NFATC2,SH3BP5,SLC23A2,ZNF106,MYO1,TRAF3,TTC21B,UIMC1,RAP1GAP,DRAXIN,ATF1,CCDC186,CGAS,GABRR2,CNKS3,CASP5,WDR12,CUL1,MOB1B,BBS4,MAPK8IP1,CFTR,UBASH3A,KITLG,AKAP10,PTPRE,MTMR2,TBX20,AFAP1,WSB1,PRKCH,TG,IL6R,ALS2,OR51E1,SNX25,PDE6A,USP7,MESD,MOK,KIR2DL4,RALB,NPAS2,VCAM1,SEL1L,ARHGAP31,GSTA3,DTX1,ZBTB33,ADA2,FANCL,DPYSL5,SLC13A5,SUPT16H,CUL5,OR7A17,NEK6,SHROOM3,XRCC4,NMU,GAST,SNAI2,IGHV3-74,BID,SIAH2,RXRG,ERN2,MBTPS2,FLNB,TIAL1,ZDHHC17,SH3GLB1,SAMHD1,IFT81,ENPP1,KCNC1,CSF1,GHRH,BCL2L1,ASB4,DHRS3,SMAD5,SLC40A1,PRAME,MED1,IPCEF1,CD14B,PTH,PRKAA2,CSF2RB,ABHD2,PLA2G4A,CAMLG,TEAD1,YBX3,AIMP1,FYB2,PCID2,CIBAR1,PBLD,FICD,CADM1,PEG10,NET1,SLC1A7,FSTL1,SVEP1,MADD,HCTR1,CREBBP,GORAB,NFKBIA,ABCC8,MT1HL1,ZC3H15,RFC2,NEDD9,OLFM4,ASS1,ADGRE3,PPP1R17,ERLIN2,OTOP1,EXOC1,GID8,FAM189A2,NDFIP2,NR2C1,CMTM7,MARCHF6,MTPN,ABI1,ITGA4,TOP3A,UBE2J2,OR6C75,ASB2,CYFIP2,HNRNPM,ACACA,ASCC2,OR13C9,RXRA,ADGRB1,WNT7A,NDFIP1,MAP3K4,ATP6V1C2,C16ORF72,OR10H2,PDE2A,LRRC2,SDCBP,JPT2,NSMCE1,NCK1,FGR,IFNAR1,RNF8,CYTH4,WNT2B,POSTN,CD101,AKAP11,DTHD1,MVB12B,ERP27,ANKRD6,FEZ2,INIP,LAMB1,SCARA5,PLCZ1,FCRLA,DIDO1,GPR55,NSUN2,TNFSF11,PPM1F,ARL13B,SH2D3C,ZFYVE28,TET1,ASB3,RAD9A,RP1L1,ITGA1,POR,NSG2,B9D1,PRDM15,SRGAP3,CSNK1G1,ATG5,FLRT2,OR2T2,TMEM25,PPP1R13B,RFX2,MTREX</p> |
| GO:0048869 | cellular developmental process | 8.122362928924366e-7 | <p>MTOR,SMOC1,LRP12,PLCB1,NEBL,SPOCK1,ZNF536,BRINP3,SGCD,CNTN4,ZFPM2,TENM4,RIPOR2,RP1,FBN1,RIMS1,TENM3,RARB,NAV2,SPAG16,USH2A,MINAR1,RIMS2,ASTN1,NEGR1,RTN1,TCF4,OCA2,DOCK10,EGFR,ANGPT1,CDK12,MACF1,DOCK2,NEDD4,CRB1,SOX6,ARMC2,PHACTR1,DNAJC13,GABRB1,NEO1,CNTN6,SLC39A12,SLC8A3,PAK1,EPAH7,SPEN,RAPGEF2,ADGRB3,DEUP1,RUNX2,ARSB,CPS1,TAOK3,LRGUK,EPB41L3,COL4A2,STAU2,TMC1,SEMA5A,SYT1,VCL,ARHGAP44,NTF3,AURKA,PYGO1,SLC8A1,SRGAP2C,MAP4K4,BMPR1B,FMN2,PAK3,TTLL7,DIP2B,ITPKB,PRKCZ,KLHL1,ZSWIM6,ABCA5,EBF2,YAP1,ALCAM,PLG,GFRA1,SYCP1,NIPBL,RNF17,MYLK3,MBNL1,TPM1,KLF15,PPARA,SYNJ1,SEMA3C,ALPK2,JARID2,GATAD2B,IL34,TANC1,MELK,BBS2,SLC9C1,RANBP3L,LDB3,PIAS1,BLK,TNR,SDC2,KCNH1,DROSHA,GLIS1,MORC1,LATS2,ASPM,AP3B1,ATP11C,ZBTB16,MUSK,USP33,CD44,PTPRO,ALPK3,LIMD1,SPRED2,RPS6KA3,NHS,PTPN2,PLXNA2,ARHGEF7,AMBRA1,OPRM1,FANCA,SEMA3E,ALPL,TMOD2,MSH2,ATL1,BICRAL,AFG3L2,MOSMO,ANK3,HMGA2,BCL11B,DOCK5,CRIM1,F</p>                                                                                                                                                                                                                                                                                                                                                                                                                                                                                                                                                                                                                                                                                                                                                                                                                                                                                                                                                                                                                                                                                                                                                                                                                                                                                                                                                                                                                                                                             |

|            |           |                          |                                                                                                                                                                                                                                                                                                                                                                                                                                                                                                                                                                                                                                                                                                                                                                                                                                                                                                                                                                                                                                                                                                                                                                                                                                                                                                                                                                                                                                                                                                                                                                                                                                                                                                                                                                                                                                                                                                                                                                                                                                                                                                                                                                                                                                                                                                                                                                                                            |
|------------|-----------|--------------------------|------------------------------------------------------------------------------------------------------------------------------------------------------------------------------------------------------------------------------------------------------------------------------------------------------------------------------------------------------------------------------------------------------------------------------------------------------------------------------------------------------------------------------------------------------------------------------------------------------------------------------------------------------------------------------------------------------------------------------------------------------------------------------------------------------------------------------------------------------------------------------------------------------------------------------------------------------------------------------------------------------------------------------------------------------------------------------------------------------------------------------------------------------------------------------------------------------------------------------------------------------------------------------------------------------------------------------------------------------------------------------------------------------------------------------------------------------------------------------------------------------------------------------------------------------------------------------------------------------------------------------------------------------------------------------------------------------------------------------------------------------------------------------------------------------------------------------------------------------------------------------------------------------------------------------------------------------------------------------------------------------------------------------------------------------------------------------------------------------------------------------------------------------------------------------------------------------------------------------------------------------------------------------------------------------------------------------------------------------------------------------------------------------------|
|            |           |                          | <p>UT9,VAV1,MYT1L,ZNF160,HLA-B,IQSEC1,PDLIM5,NRK,BMP2,RC3H2,TRAK1,GFI1B,SEMA3D,NFATC2,TDRD7,SLC23A2,ANKRD26,TTC21B,B4GALT6,TSPA N2,RAP1GAP,DRAXIN,ATF1,NHSL1,FARP1,BBS4,COL5A1,CFTR,KITLG,MTMR2,SH3PXD2A,TBX20,PRKCH,IL6R,ALS2,HEMGN,TOX,PTPRB,TBATA,YIPF6,VCAM1,DTX1,DPYSL5,HECTD1,SHROOM3,SNAI2,RXRG,SP3,FLNB,TRIM58,TIAL1,ELF2,ZDHHC17,SLC22A14,KRT6B,IFT81,ENPP1,CSF1,BCL2L1,SPATA48,CTDP1,ASB4,SMAD5,PRAME,CABYR,MED1,FAT1,PRAMEF25,PTH,SDF4,SOHLH1,ABHD2,VSTM2A,ZBTB7C,ANP32B,YBX3,PCID2,CADM1,PEG10,ANLN,VSX1,FSTL1,ARL11,NFKBIA,ABCC8,NEDD9,KRT6A,NR2C1,CMTM7,MTPN,ABI1,ITGA4,BCAP29,ASB2,CEP120,DHTKD1,CYFIP2,KRT85,RXRA,ADGRB1,WNT7A,NDFIP1,MAP3K4,FOXO6,PDE2A,SDCBP,NCK1,FLVCR1,FGR,SPRR2D,RNF8,KIAA0319L,DNMT3L,LHX9,WNT2B,CD101,FEZ2,LAMB1,FCRLA,GPR55,NSUN2,TNFSF11,ARL13B,TET1,RP1L1,ITGA1,POR,B9D1,MACROH2A1,ATG5,UNK,FLRT2,NUDT21,DDX6,RFX2,CCDC141</p>                                                                                                                                                                                                                                                                                                                                                                                                                                                                                                                                                                                                                                                                                                                                                                                                                                                                                                                                                                                                                                                                                                                                                                                                                                                                                                                                                                                                                                                                                                                                   |
| GO:0023052 | signaling | 0.0000010747297121753465 | <p>WWC1,GARNL3,MTOR,NSG1,LRP12,PLCB1,ANKS1B,ZNF536,KSR1,SGCD,CNTN4,TENM4,RIPOR2,RP1,ERC1,FBN1,CDH8,DCDC1,RIMS1,PIK3C3,TENM3,RARB,ENPEP,MINAR1,CDC42EP3,RIMS2,ADGRE1,PJA2,BABAM2,SV2C,ERBIN,RHPN2,CACNG2,MAP3K9,DOCK10,EGFR,DENND1A,USP14,ANGPT1,MACF1,PRKACB,NCOR1,DOCK2,NEDD4,MAML2,CRB1,BTBD9,DKK2,MAPKBP1,GABRB1,DGKI,GRIA1,NEO1,CNTN6,SLC39A12,SLC8A3,TOM1L2,PAK1,EPHA7,CTNNAL1,RALGPS1,SPEN,RAPGEF2,ADGRB3,RUNX2,GABRA6,TAOK3,CPEB4,PRICKLE2,PATJ,RPTOR,COL4A2,PPP1R12B,ADAM10,IL1R1,APBB2,CACNB2,STAU2,USP18,SEMA5A,SYT1,ARHGAP44,NTF3,ACER2,AURKA,PYGO1,SLC8A1,TAF12,MAP4K4,BMPR1B,FMN2,HOMER2,RAB8B,PAK3,RFTN1,PDE1A,LARP1,ITPKB,RGS20,PDE10A,RAP1GDS1,HAT,KICS2,IFT57,INTS7,PRKCZ,BTLA,GRB10,RGS9,DEFA3,YAP1,PPM1L,ALCAM,PLG,PAPPA,PDGFD,ZNRF3,ITGBL1,UBE2O,GFRA1,STK38,HRH4,SORCS3,ATF6,TLK1,BIRC6,KLF15,PPARA,SYNJ1,ADAMTS3,ARAP2,PTPRK,ARHGEF12,TRERF1,SEMA3C,DAPK1,SLC24A4,SEC14L1,STK32B,MAGI1,ALPK2,SCN2A,AMPH,CPE,EVC2,IL34,MELK,BBS2,OR4F6,NKG7,USP8,PIAS1,BLK,TNR,GAS2,KCNH1,APBB1IP,EIPR1,MYO10,LATS2,GGG1L,ASPM,AP3B1,DENND2B,MUSK,GNNG7,PRKCE,USP33,CD44,RGS12,PTPRO,NSMAF,LNPEP,LIMD1,SPRED2,RPS6KA3,PTPN2,PLXNA2,MCF2L,OR4F15,ATXN3,RIC3,ARHGEF7,OPRM1,FANCA,SEMA3E,TMOD2,MSH2,RELL1,HIPK3,EPN2,CLSPN,MOSMO,TMEM116,MDFIC,ANK3,HMGA2,DOCK5,STK32A,PLCE1,IL17RA,CRIM1,PRR5L,VAV1,IQSEC1,CACNA1I,BLM,NRK,MAGI3,ADCY10,BMP2,RC3H2,RIN3,BMP2K,SEMA3D,NETO2,NFATC2,SH3BP5,ZNF106,MYOM1,TRAF3,TTC21B,UIMC1,RAP1GAP,DRAXIN,ATF1,CCDC186,CGAS,GABRR2,CNKSRR3,CASP5,WDR12,CUL1,FARP1,MOB1B,BBS4,MAPK8IP1,CFTR,UBASH3A,KITLG,AKAP10,PTPRE,MTMR2,TBX20,AFAP1,WSB1,PRKCH,TG,IL6R,ALS2,OR51E1,SNX25,PDE6A,SCN10A,USP7,MESD,MOK,KIR2DL4,RALB,VCAM1,SEL1L,ARHGAP31,DTX1,ZBTB33,ADA2,DPYSL5,CUL5,OR7A17,NEK6,NMU,GAST,SNAI2,IGHV3-74,BID,SIAH2,RXRG,ERN2,MBTPS2,FLNB,TIAL1,ZDHHC17,SAMHD1,IFT81,ENPP1,CSF1,GHRH,BCL2L1,ASB4,DHRS3,SMAD5,PRAME,MED1,CDC14B,FAT1,PTH,PRKAA2,CSF2RB,ABHD2,PLA2G4A,CAMLG,TEAD1,YBX3,AIMP1,FYB2,PCID2,CIBAR1,PBLD,FICD,CADM1,PEG10,NET1,SLC1A7,FSTL1,SVEP1,MADD,HCRTR1,CREBBP,GORAB,NFKBIA,ABCC8,ZC3H15,NEDD9,OLFM4,ADGRE3,PPP1R17,ERLIN2,OTOP1,EXOC1,GID8,FAM189A2,NDFIP2,NR2C1,CMTM7,ABI1,ITGA4,OR6C75,ASB2,CYFIP2,OR13C9,RXRA,ADGRB1,WNT7A,NDFIP1,MAP3K4,ATP6V1C2,C16ORF72,OR10H2,PDE2A,LRRC2,SDCBP,JPT2,NCK1,FGR,SNAP29,IFNAR1,CYTH4,WNT2B,POSTN,CD101,AKAP11,DTHD1,MVB12B,ANKRD6,SCGN,FEZ2,INIP,LAMB1,PLCZ1,FCRLA,DIDO1,GPR55,NSUN2,TNFSF11,PPM1F,ARL13B,SH2D3C</p> |

|            |                    |                          |                                                                                                                                                                                                                                                                                                                                                                                                                                                                                                                                                                                                                                                                                                                                                                                                                                                                                                                                                                                                                                                                                                                                                                                                                                                                                                                                                                                                                                                                                                                                                                                                                                                                                                                                                                                                                                                                                                                                                                                                                                                                                                                                                                                                                                                                                                                                 |
|------------|--------------------|--------------------------|---------------------------------------------------------------------------------------------------------------------------------------------------------------------------------------------------------------------------------------------------------------------------------------------------------------------------------------------------------------------------------------------------------------------------------------------------------------------------------------------------------------------------------------------------------------------------------------------------------------------------------------------------------------------------------------------------------------------------------------------------------------------------------------------------------------------------------------------------------------------------------------------------------------------------------------------------------------------------------------------------------------------------------------------------------------------------------------------------------------------------------------------------------------------------------------------------------------------------------------------------------------------------------------------------------------------------------------------------------------------------------------------------------------------------------------------------------------------------------------------------------------------------------------------------------------------------------------------------------------------------------------------------------------------------------------------------------------------------------------------------------------------------------------------------------------------------------------------------------------------------------------------------------------------------------------------------------------------------------------------------------------------------------------------------------------------------------------------------------------------------------------------------------------------------------------------------------------------------------------------------------------------------------------------------------------------------------|
|            |                    |                          | ,ZFYVE28,TET1,ASB3,RAD9A,RP1L1,ITGA1,POR,NSG2,B9D1,PRDM15,SRGAP3,CSNK1G1,FLRT2,OR2T2,TMEM25,PPP1R13B                                                                                                                                                                                                                                                                                                                                                                                                                                                                                                                                                                                                                                                                                                                                                                                                                                                                                                                                                                                                                                                                                                                                                                                                                                                                                                                                                                                                                                                                                                                                                                                                                                                                                                                                                                                                                                                                                                                                                                                                                                                                                                                                                                                                                            |
| GO:0051179 | localization       | 0.0000011936566781097806 | WWC1,MICU2,MTOR,NSG1,LRP12,SLC25A21,TMPRSS2,ABCA13,ANKS1B,SGCD,CACNA2D3,KCNH5,SLC37A1,PIEZO2,RIPOR2,ERC1,SLC44A5,KCNMA1,FBN1,COG5,RIMS1,PIK3C3,SPIR E1,EXOC6B,SPAG16,TRAPPC8,USH2A,RIMS2,SV2C,ERBIN,FCHO2,CACNG2,MYO5C,OCA2,EGFR,DENND1A,ANGPT1,MACF1,DOCK2,NEDD4,CRB1,BTBD9,TUSC3,DNAJC13,GABRB1,DGKI,C12ORF4,GRIA1,SLC39A12,SLC8A3,TOM1L2,CEP128,PAK1,GRAMD1B,RAPGEF2,ARSB,GABRA6,CPS1,LDLRAD3,AGK,RANBP17,SLC44A1,EPB41L3,KIF4A,ADAM10,SLC7A2,CACNB2,STAU2,TMC1,SYT1,VCL,ARHGAP44,NTF3,AURKA,PYGO1,SLC8A1,FMN2,HOMER2,RAB8B,RFTN1,RAP1GDS1,CLIC6,KICS2,CUBN,SCP2,IFT57,PRKCZ,SPOP,GRB10,MCPH1,CNST,ABCA5,YAP1,VPS35L,ABCD3,RABGAP1L,SGTB,TRPC7,SLC45A4,UBE2O,SYCP1,NIPBL,NIPAL2,IPO11,MICU1,CORO2B,TLK1,LRRC38,ZDHHC14,CORIN,KLF15,PPARA,SNX30,KCNS3,SYNJ1,RSRC1,PTPRK,DAPK1,SLC24A4,SEC14L1,VPS13C,DNAH11,JARID2,SCN2A,RAB22A,DNAJC15,AMPH,CPE,BBS2,SLC9C1,RANBP3L,NKG7,USP8,SLC36A1,BLK,KCNH1,FHIP1A,EIPR1,DNAH5,MYO10,PLEKHA8,LATS2,GSGL1,ASPM,AP3B1,ATP11C,ABC B7,ZBTB16,MUSK,PRKCE,SLMAP,USP33,ABCC9,STXBP6,PEX14,PTPN2,PLXNA2,ATXN3,RIC3,SLC2A3,ARHGEF7,ALG10B,ATP8A1,RFTN2,OPRM1,BIN2,CYBRD1,CNNM4,ABHD17C,MSH2,EPN2,ABCA10,CD163,AFG3L2,MDFIC,ANK3,NIPA2,COG2,VPS41,LYPLA1,PRR5L,VPS37A,VAV1,CACNA1I,BHLHE40-AS1,SLC10A7,ADCY10,STX12,BMP2,ATP9A,TRAK1,RIN3,BMP2K,SLC15A5,NETO2,AP4E1,SLC23A2,MYO11,PRG4,TTC21B,SNX8,CCDC186,KCNH8,SLC37A2,GABRR2,CNKSRR3,DAW1,BBS4,LRRC8B,MAPK8IP1,CFTR,TBC1D13,NMD3,AKAP10,REPS1,MTMR2,HEPHL1,TRPM6,PRKCH,SLC12A1,TG,ALS2,SNX25,OSCP1,TSPAN33,SCN10A,MAP7,USP7,MON2,MESD,RALB,YIPF6,SEL1L,SLC13A5,NPIP1A,CUL5,HECTD1,SHROOM3,XRCC4,IGHV3-74,BID,OSBPL10,COX5A,TRIM58,ZDHHC17,FYCO1,SH3GLB1,SLC22A14,XKR5,IFT81,ENPP1,KCNC1,GHRH,BCL2L1,SYNJ2,SLC40A1,FAM149B1,CABYR,CIDEC,MED1,IPCEF1,ATG4B,PTH,PRKAA2,VSTM2A,PLA2G4A,SLC25A52,KIFC1,CAMLG,COX7A2L,ANP32B,AIMP1,LASP1,FYB2,PCID2,PEG10,SLC1A7,MELTF,ARL11,STAH3,TRPV5,NFKBIA,ABCC8,RTRAF,NEDD9,SLC14A2,SAR1A,TRAPPC3,OTOP1,EXOC1,HEPACAM,FAM189A2,NDFIP2,SLC6A11,ITGA4,OAZ2,BCAP29,UBE2J2,TM9SF4,CEP120,STOML1,RXRA,ADGRB1,WNT7A,NDFIP1,ATP6V1C2,MAGEL2,SDCBP,JPT2,FLVCR1,FGR,SNAP29,C2,INTS13,RN7SL767P,PLEKHA3,OCN,STON1-GTF2A1L,AKAP11,MFSD9,MVB12B,CD5L,SCARA5,HEATR5A,PLCZ1,SLC9A5,NSUN2,ANO10,TNFSF11,PPM1F,ARL13B,XPO7,ODR4,TMEM63C,SLC16A9,ASB3,IFT46,SLC14A1,NSG2,B9D1,MACROH2A1,CSNK1G1,ATP6V0D2,ATG5,NUP43,DDX6,CCDC141 |
| GO:0007154 | cell communication | 0.0000013607603553342886 | WWC1,GARNL3,MTOR,NSG1,LRP12,PLCB1,ANKS1B,ZNF536,KSR1,SGCD,CNTN4,TENM4,RIPOR2,RP1,ERC1,FBN1,CDH8,DCDC1,RIMS1,PIK3C3,TENM3,RARB,ENPEP,MINAR1,CDC42EP3,RIMS2,ADGRE1,PJA2,BABAM2,SV2C,ERBIN,RHPN2,CACNG2,MAP3K9,DOCK10,EGFR,DENND1A,USP14,ANGPT1,MACF1,PRKACB,NCOR1,DOCK2,NEDD4,MAML2,CRB1,BTBD9,DDK2,MAPKBP1,GABRB1,DGKI,GRIA1,NEO1,CNTN6,SLC39A12,SLC8A3,TOM1L2,PAK1,EPHA7,CTNNAL1,RALGPS1,SPEN,RAPGEF2,ADGRB3,RUNX2,GABRA6,TAOK3,CPEB4,PRICKLE2,PATJ,RPTOR,COL4A2,PPP1R12B,ADAM10,IL1R1,APBB2,CACNB2,STAU2,USP18,SEMA5A,SYT1,ARHGAP44,NTF3,ACER2,AURKA,PYGO1,SLC8A1,TAF4A,MAP4K4,BMPR1B,FMN2,HOMER2,RAB8B,PAK3,RFTN1,PDE1A,LARP1,ITPKB,RGS20,PDE10A,RAP1GDS1,HAT,KICS2,IFT57,INTS7,PRKCZ,BTLA,GRB10,RGS9,DEFA3,YAP1,PPM1L,ALCAM,PLG,PAPPA,PDGFD,ZNRF3,ITGBL1,UB                                                                                                                                                                                                                                                                                                                                                                                                                                                                                                                                                                                                                                                                                                                                                                                                                                                                                                                                                                                                                                                                                                                                                                                                                                                                                                                                                                                                                                                                                                                                                                  |

|            |                                  |                          |                                                                                                                                                                                                                                                                                                                                                                                                                                                                                                                                                                                                                                                                                                                                                                                                                                                                                                                                                                                                                                                                                                                                                                                                                                                                                                                                                                                                                                                                                                                                                                                                                                                                                                                                                                                     |
|------------|----------------------------------|--------------------------|-------------------------------------------------------------------------------------------------------------------------------------------------------------------------------------------------------------------------------------------------------------------------------------------------------------------------------------------------------------------------------------------------------------------------------------------------------------------------------------------------------------------------------------------------------------------------------------------------------------------------------------------------------------------------------------------------------------------------------------------------------------------------------------------------------------------------------------------------------------------------------------------------------------------------------------------------------------------------------------------------------------------------------------------------------------------------------------------------------------------------------------------------------------------------------------------------------------------------------------------------------------------------------------------------------------------------------------------------------------------------------------------------------------------------------------------------------------------------------------------------------------------------------------------------------------------------------------------------------------------------------------------------------------------------------------------------------------------------------------------------------------------------------------|
|            |                                  |                          | <p>E20,GFRA1,STK38,HRH4,SORCS3,ATF6,TLK1,BIRC6,KLF15,PPARA,SYNJ1,ADAMTS3,ARAP2,PTPRK,ARHGEF12,TRERF1,SEMA3C,DAPK1,SLC24A4,SEC14L1,STK32B,MAGI1,ALPK2,SCN2A,DNAJC15,AMPH,CPE,EVC2,IL34,MELK,BBS2,OR4F6,NKG7,USP8,PIAS1,BLK,TNR,GAS2,KCNH1,APBB1IP,EIPR1,MYO10,LATS2,GSG1L,ASPM,AP3B1,DENND2B,MUSK,GNNG7,PRKCE,USP33,CD44,RGS12,PTPRO,NSMAF,LNPEP,LIMD1,SPRED2,RPS6KA3,PTPN2,PLXNA2,MCF2L,OR4F15,ATXN3,RIC3,ARHGEF7,AMBRA1,OPRM1,FANCA,SEMA3E,TMOD2,MSH2,RELL1,HIPK3,EPN2,CLSPN,MOSMO,TMEM116,MDFIC,ANK3,HMGA2,VPS41,DOCK5,STK32A,PLCE1,IL17RA,CRIM1,PRR5L,VAV1,IQSEC1,CACNA1I,BLM,NRK,MAGI3,ADCY10,BMP2,RC3H2,RIN3,BMP2K,SEMA3D,NETO2,NFATC2,SH3BP5,ZNF106,MYOM1,TRAFA3,TTC21B,UIMC1,RAP1GAP,DRAXIN,ATF1,CCDC186,CGAS,GABRR2,CNKSR3,CASP5,WDR12,CUL1,FARP1,MOB1B,BBS4,MAPK8IP1,CFTR,UBASH3A,KITLG,AKAP10,PTPRE,MTMR2,TBX20,AFAP1,WSB1,PRKCH,TG,IL6R,ALS2,OR51E1,SNX25,PDE6A,SCN10A,USP7,MESD,MOK,KIR2DL4,RALB,VCAM1,SEL1L,ARHGAP31,DTX1,ZBTB33,ADA2,DPYSL5,CUL5,OR7A17,NEK6,NMU,GAST,SNAI2,IGHV3-74,BID,SIAH2,RXRG,ERN2,MBTPS2,FLNB,TIAL1,ZDHHC17,SH3GLB1,SAMHD1,IFT81,ENPP1,CSF1,GHRH,BCL2L1,ASB4,DHRS3,SMAD5,PRAME,MED1,CDC14B,FAT1,PTH,PRKAA2,CSF2RB,ABHD2,PLA2G4A,CAMLG,TEAD1,YBX3,ATMP1,FYB2,PCID2,CIBAR1,PBLD,FICD,CADM1,PEG10,NET1,SLC1A7,FSTL1,SVEP1,MADD,HCRTR1,CREBBP,GORAB,NFKBIA,ABCC8,ZC3H15,NEDD9,OLFM4,ADGRE3,PPP1R17,ERLIN2,OTOP1,EXOC1,GID8,FAM189A2,NDFIP2,NR2C1,CMTM7,ABI1,ITGA4,OR6C75,ASB2,CYFIP2,OR13C9,RXRA,ADGRB1,WNT7A,NDFIP1,MAP3K4,ATP6V1C2,C16ORF72,OR10H2,PDE2A,LRRC2,SDCBP,JPOT2,NCK1,FGR,SNAP29,IFNAR1,CYTH4,WNT2B,POSTN,CD101,AKAP11,DTHD1,MVB12B,ANKRD6,SCGN,FEZ2,INIP,LAMB1,PLCZ1,FCRLA,DIDO1,GPR55,NSUN2,TNFSF11,PPM1F,ARL13B,SH2D3C,ZFYVE28,TET1,ASB3,RAD9A,RP1L1,ITGA1,POR,NSG2,B9D1,PRDM15,SRGAP3,CSNK1G1,ATG5,FLRT2,OR2T2,TMEM25,PPP1R13B</p> |
| GO:0007399 | nervous system development       | 0.000002745392228573166  | <p>MTOR,LRP12,PLCB1,SPOCK1,ZNF536,BRINP3,CNTN4,TENM4,RIPOR2,RP1,ODAD2,RIMS1,TENM3,RARB,NAV2,USH2A,MINAR1,RIMS2,ASTN1,NEGR1,RTN1,TCF4,DOCK10,EGFR,MACF1,PRKACB,NEDD4,CRB1,SOX6,PHACTR1,GABRB1,NEO1,CNTN6,SLC39A12,SLC8A3,PAK1,EPHA7,SPEN,RAPGEF2,ADGRB3,RUNX2,ARSB,TAOK3,LDB2,EPB41L3,STAU2,TMC1,SEMA5A,SYT1,VCL,ARHGAP44,NTF3,AURKA,SLC8A1,SRGAP2C,SRGAP2B,MAP4K4,BMPR1B,PAK3,TTL7,DIP2B,CHST8,IFT57,PRKCZ,KLHL1,MCPH1,ZSWIM6,YAP1,CADM2,ALCAM,GFRA1,NIPBL,MBNL1,KLF15,SYNJ1,SEMA3C,SLC24A4,DNAH11,JARID2,SCN2A,IL34,BBS2,BLK,TNR,SDC2,DNAH5,GALC,ASPM,ZBTB16,MUSK,USP33,PTPRO,RPS6KA3,PLXNA2,ATXN3,ARHGEF7,AMBRA1,KDM7A,OPRM1,SEMA3E,TMOD2,ATL1,AFG3L2,MOSMO,MNAT1,ANK3,BCL11B,AK8,CRIM1,FUT9,MYT1L,IQSEC1,PDLIM5,NRK,BMP2,TRAK1,SEMA3D,SLC23A2,TTC21B,B4GALT6,TSPAN2,RAP1GAP,DRAXIN,ATF1,CASP5,FARP1,BBS4,MTMR2,TBX20,LGI2,PRKCH,TG,ALS2,TOX,PTPRB,NPAS2,VCAM1,LRIIG1,DTX1,DPYSL5,HECTD1,SHROOM3,RXRG,ZDHHC17,KCNC1,CSF1,GHRH,SYNJ2,MED1,ANP32B,CADM1,VSX1,BPNT1,GORAB,ABCC8,PPP1R17,SLC6A11,MTPN,ABI1,ITGA4,POU1F1,CPEP120,CYFIP2,ST8SIA4,ADGRB1,WNT7A,FOXO6,SDCBP,NCK1,KIAA0319L,LHX9,WNT2B,FEZ2,LAMB1,ARL13B,UGP2,RP1L1,ITGA1,UNK,FLRT2,DDX6,CCDC141</p>                                                                                                                                                                                                                                                                                                                                                                                                                                                                                                                                                                                                                       |
| GO:0048856 | anatomical structure development | 0.0000033640997780029777 | <p>MTOR,SMOC1,LRP12,PLCB1,NEBL,SPOCK1,ZNF536,BRINP3,SGCD,CNTN4,ZFPM2,TENM4,RIPOR2,RP1,ODAD2,FBN1,CDH8,RIMS1,SPIRE1,TENM3,RARB,NAV2,ENPEP,SPAG16,USH2A,MINAR1,CDC42EP3,RIMS2,ASTN1,PARVB,NEGR1,MYO3B,RTN1,TCF4,OCA2,DOCK10,EGFR,ANGPT1,MACF1,PRKACB,DOCK2,NEDD4,CRB1,SOX6,ARMC2,PHACTR1,DKK2,GABRB1,NEO1,CNTN6,SLC39A12,SLC8A3,PAK1,EPHA7,SPEN,RAPGEF2,ADGR</p>                                                                                                                                                                                                                                                                                                                                                                                                                                                                                                                                                                                                                                                                                                                                                                                                                                                                                                                                                                                                                                                                                                                                                                                                                                                                                                                                                                                                                      |

|            |                     |                          |                                                                                                                                                                                                                                                                                                                                                                                                                                                                                                                                                                                                                                                                                                                                                                                                                                                                                                                                                                                                                                                                                                                                                                                                                                                                                                                                                                                                                                                                                                                                                                                                                                                                                                                                                                                                                                                                                                                                                                                                                                                                                                                                                                                                                                  |
|------------|---------------------|--------------------------|----------------------------------------------------------------------------------------------------------------------------------------------------------------------------------------------------------------------------------------------------------------------------------------------------------------------------------------------------------------------------------------------------------------------------------------------------------------------------------------------------------------------------------------------------------------------------------------------------------------------------------------------------------------------------------------------------------------------------------------------------------------------------------------------------------------------------------------------------------------------------------------------------------------------------------------------------------------------------------------------------------------------------------------------------------------------------------------------------------------------------------------------------------------------------------------------------------------------------------------------------------------------------------------------------------------------------------------------------------------------------------------------------------------------------------------------------------------------------------------------------------------------------------------------------------------------------------------------------------------------------------------------------------------------------------------------------------------------------------------------------------------------------------------------------------------------------------------------------------------------------------------------------------------------------------------------------------------------------------------------------------------------------------------------------------------------------------------------------------------------------------------------------------------------------------------------------------------------------------|
|            |                     |                          | <p>B3, DEUP1, RUNX2, ARSB, CPS1, TAOK3, PRICKLE2, LDB2, EPB41L3, COL4A2, ADAM10, STAU2, TMC1, SEMA5A, SYT1, VCL, ARHGAP44, NTF3, AURKA, CFDP1, PYGO1, SLC8A1, SRGAP2C, SRGAP2B, MAP4K4, BMPR1B, FMN2, PAK3, TTLL7, DIP2B, ITPKB, CHST8, IFT57, PRKCZ, KLHL1, MCPH1, ZSWIM6, EBF2, YAP1, RIPK4, CADM2, ALCAM, PLG, PDGFD, ZNRF3, ABLIM1, GFRA1, SYCP1, NIPBL, RNF17, MYLK3, MBNL1, ATF6, TPM1, ANKRD11, BIRC6, KLF15, PPARA, SYNJ1, ADAMTS3, SF3B6, SEMA3C, SLC24A4, ALPK2, DNAH11, JARID2, SCN2A, CPE, IL34, TANC1, MELK, BBS2, RANBP3L, LDB3, BLK, TNF, XIRP2, SDC2, GAS2, KCNH1, DROSHA, TTLL5, DNAH5, MYO10, GALC, LATS2, ASPM, AP3B1, ATP11C, ZBTB16, MUSK, SETDB2, USP33, CD44, PTPRO, ALPK3, COL5A3, LIMD1, SPRED2, RPS6KA3, NHS, PTPN2, PLXNA2, ATXN3, ST8SIA6, ARHGEF7, AMBRA1, KDM7A, OPRM1, FANCA, CNM4, SEMA3E, ALPL, TMOD2, MSH2, ATL1, LUC7L, EPN2, AFG3L2, MOSMO, MNAT1, ANK3, XYLT1, HMGA2, BCL11B, DOCK5, AK8, PLCE1, CRIM1, FUT9, VAV1, MYT1L, ZNF160, HLA-B, IQSEC1, PDLIM5, NRK, SLC10A7, BMP2, RC3H2, TRAK1, GFI1B, BMP2K, RNF38, SEMA3D, NFATC2, TDRD7, SLC23A2, TTC21B, B4GALT6, TSPAN2, RAP1GAP, DRAXIN, ATF1, CASP5, CUL1, DAW1, FARP1, BBS4, COL5A1, CFTR, AHDC1, KITLG, GTF2I, TADA2A, MTMR2, SH3PXD2A, TBX20, LGI2, PRKCH, TG, IL6R, ALS2, TFDP1, TOX, PTPRB, PDE6A, SCN10A, MESD, NPAS2, YIPF6, VCAM1, LRIG1, DTX1, DPYSL5, HECTD1, SHROOM3, XRCC4, SNAI2, SIAH2, RXRG, SP3, MBTPS2, FLNB, TRIM58, TIAL1, ZDHHC17, SLC22A14, KRT6B, XKR5, SAMHD1, IFT81, ENPP1, KCNC1, CSF1, GHRH, BCL2L1, KRT25, CTDP1, ASB4, DHRS3, SMAD5, SYNJ2, SLC40A1, CABYR, MED1, ATG4B, FAT1, SCML2, PTH, SOHLH1, ABHD2, TEAD1, ANP32B, YBX3, AIMP1, PCID2, CIBAR1, CADM1, ANLN, VSX1, FSTL1, BPNT1, SVEP1, CREBBP, ARL11, GORAB, SIAH3, NFKBIA, ABCC8, ALX4, NEDD9, ASS1, PPP1R17, OTOP1, KRT6A, STOX2, AGO1, NR2C1, CMTM7, SLC6A11, MTPN, ABI1, ITGA4, POU1F1, ASB2, CEP120, DHTKD1, CYFIP2, KRT85, ST8SIA4, RXRA, ADGRB1, WNT7A, NDFIP1, MAP3K4, FOXO6, PDE2A, SDCBP, NCK1, FLVCR1, FGR, SPRR2D, RNF8, KIAA0319L, DNMT3L, LHX9, WNT2B, TNNT1, POSTN, CD101, ANKRD6, FEZ2, LAMB1, GPR55, NSUN2, TNFSF11, ARL13B, UGP2, TET1, RP1L1, DDX10, ITGA1, POR, BDN1, MACROH2A1, ATG5, UNK, FLRT2, NUDT21, DDX6, RFX2, CCDC141</p> |
| GO:0048468 | cell development    | 0.0000034562975566551235 | <p>MTOR, LRP12, PLCB1, NEBL, SPOCK1, SGCD, CNTN4, TENM4, RIOR2, RP1, FBN1, RIMS1, TENM3, RARB, SPAG16, MINAR1, RIMS2, NEGR1, OCA2, DOCK10, ANGPT1, MACF1, DOCK2, NEDD4, CRB1, ARMC2, PHACTR1, GABRB1, NEO1, CNTN6, SLC39A12, SLC8A3, PAK1, EPHA7, SPEN, RAPGEF2, ADGRB3, RUNX2, ARSB, TAOK3, EPB41L3, STAU2, TMC1, SEMA5A, SYT1, VCL, ARHGAP44, NTF3, AURKA, PYGO1, SLC8A1, SRGAP2C, MAP4K4, BMPR1B, FMN2, PAK3, DIP2B, ITPKB, PRKCZ, KLHL1, YAP1, ALCAM, GFRA1, SYCP1, RNF17, MYLK3, TPM1, PPARA, SYNJ1, SEMA3C, ALPK2, IL34, MELK, BBS2, LDB3, BLK, TNF, SDC2, DROSHA, LATS2, ASPM, AP3B1, ATP11C, ZBTB16, USP33, PTPRO, ALPK3, LIMD1, PTPN2, PLXNA2, ARHGEF7, AMBRA1, OPRM1, FANCA, SEMA3E, TMOD2, MSH2, ATL1, AFG3L2, ANK3, BCL11B, FUT9, VAV1, MYT1L, ZNF160, HLA-B, IQSEC1, PDLIM5, NRK, BMP2, RC3H2, GFI1B, SEMA3D, NFATC2, TDRD7, SLC23A2, B4GALT6, TSPAN2, DRAXIN, ATF1, FARP1, BBS4, CFTR, KITLG, MTMR2, SH3PXD2A, TBX20, PRKCH, IL6R, ALS2, TOX, YIPF6, VCAM1, DTX1, DPYSL5, HECTD1, SHROOM3, SNAI2, SP3, FLNB, TRIM58, TIAL1, ZDHHC17, SLC22A14, IFT81, CSF1, BCL2L1, CTDP1, SMAD5, CABYR, MED1, FAT1, SOHLH1, ABHD2, YBX3, PCID2, ANLN, VSX1, ARL11, NFKBIA, ABCC8, NEDD9, CMTM7, ABI1, ITGA4, ASB2, DHTKD1, CYFIP2, ADGRB1, WNT7A, NDFIP1, FOXO6, PDE2A, NCK1, FLVCR1, RNF8, LHX9, WNT2B, CD101, FEZ2, LAMB1, GPR55, NSUN2, TNFSF11, ARL13B, RP1L1, ITGA1, ATG5, UNK, FLRT2, NUDT21, RFX2, CCDC141</p>                                                                                                                                                                                                                                                                                                                                                                                                                                                                                                                                                                                                                                                                                                                                                                                                             |
| GO:0007165 | signal transduction | 0.0000044039938387       | <p>WWC1, GARNL3, MTOR, NSG1, LRP12, PLCB1, ANKS1B, ZNF536, KSR1, SGCD, TENM4, RIOR2, RP1, ERC1, FBN1, DCDC1, RIMS1, PIK3C3, TENM3, RARB, ENPEP, MINAR1, CDC42EP3, RIMS2, ADGR</p>                                                                                                                                                                                                                                                                                                                                                                                                                                                                                                                                                                                                                                                                                                                                                                                                                                                                                                                                                                                                                                                                                                                                                                                                                                                                                                                                                                                                                                                                                                                                                                                                                                                                                                                                                                                                                                                                                                                                                                                                                                                |



|            |                                  |                        |                                                                                                                                                                                                                                                                                                                                                                                                                                                                                                                                                                                                                                                                                                                                                                                                                                                                                                                                                                                                                                                                                                                                                                                                                                                                                                                                                                                                                                                                                                                                                                                                                                                                                                                                                                                                                                                                                                                                                                                                                                                                                                                                                                                                                                                                                                                                                                                                                                                                                                                                                           |
|------------|----------------------------------|------------------------|-----------------------------------------------------------------------------------------------------------------------------------------------------------------------------------------------------------------------------------------------------------------------------------------------------------------------------------------------------------------------------------------------------------------------------------------------------------------------------------------------------------------------------------------------------------------------------------------------------------------------------------------------------------------------------------------------------------------------------------------------------------------------------------------------------------------------------------------------------------------------------------------------------------------------------------------------------------------------------------------------------------------------------------------------------------------------------------------------------------------------------------------------------------------------------------------------------------------------------------------------------------------------------------------------------------------------------------------------------------------------------------------------------------------------------------------------------------------------------------------------------------------------------------------------------------------------------------------------------------------------------------------------------------------------------------------------------------------------------------------------------------------------------------------------------------------------------------------------------------------------------------------------------------------------------------------------------------------------------------------------------------------------------------------------------------------------------------------------------------------------------------------------------------------------------------------------------------------------------------------------------------------------------------------------------------------------------------------------------------------------------------------------------------------------------------------------------------------------------------------------------------------------------------------------------------|
|            | on                               | 12315                  | <p>E1 ,PJA2 ,BABAM2 ,ERBIN ,RHPN2 ,CACNG2 ,MAP3K9 ,DOCK10 ,E GFR ,DENND1A ,ANGPT1 ,MACF1 ,PRKACB ,NCOR1 ,DOCK2 ,NEDD4 ,MAML2 ,DKK2 ,MAPKBP1 ,GABRB1 ,DGKI ,GRIA1 ,NEO1 ,CNTN6 ,SLC39A12 ,SLC8A3 ,TOM1L2 ,PAK1 ,EPHA7 ,CTNNA1 ,RALGPS1 ,SPEN ,RAPGEF2 ,ADGRB3 ,RUNX2 ,GABRA6 ,TAOK3 ,CPEB4 ,PRICKLE2 ,PATJ ,RPTOR ,COL4A2 ,PPP1R12B ,ADAM10 ,IL1R1 ,APBB2 ,USP18 ,SEMA5A ,ARHGAP44 ,NTF3 ,ACER2 ,AURKA ,PYGO1 ,SLC8A1 ,TAFA2 ,MAP4K4 ,BMPR1B ,FMN2 ,HOMER2 ,PAK3 ,RFTN1 ,PDE1A ,LARP1 ,ITPKB ,RGS20 ,PDE10A ,RAP1GDS1 ,HHAT ,KICS2 ,IFT57 ,INTS7 ,PRKCZ ,BTLA ,GRB10 ,RGS9 ,DEFA3 ,YAP1 ,PPM1L ,ALCAM ,PAPPA ,PDGFD ,ZNRF3 ,ITGBL1 ,UBE2O ,GFRA1 ,STK38 ,HRH4 ,SORCS3 ,ATF6 ,TLK1 ,BIRC6 ,KLF15 ,PPARA ,ADAMTS3 ,ARAP2 ,PTPRK ,ARHGEF12 ,TRERF1 ,SEMA3C ,DAPK1 ,SLC24A4 ,SEC14L1 ,STK32B ,MAGI1 ,ALPK2 ,SCN2A ,CPE ,EVC2 ,IL34 ,MELK ,BBS2 ,OR4F6 ,NKG7 ,USP8 ,PIAS1 ,BLK ,GAS2 ,KCNH1 ,APBB1IP ,MYO10 ,LATS2 ,GSG1L ,ASPM ,AP3B1 ,DENND2B ,MUSK ,GNG7 ,PRKCE ,USP33 ,CD44 ,RGS12 ,PTPRO ,NSMAF ,LNPEP ,LIMD1 ,SPRED2 ,RPS6KA3 ,PTPN2 ,PLXNA2 ,MCF2L ,OR4F15 ,ARHGEF7 ,OPRM1 ,FANCA ,SEMA3E ,TMOD2 ,MSH2 ,RELL1 ,HIPK3 ,EPN2 ,CLSPN ,MOSMO ,TMEM116 ,MDFIC ,ANK3 ,HMGA2 ,DOCK5 ,STK32A ,PLCE1 ,IL17RA ,CRIM1 ,PRR5L ,VAV1 ,IQSEC1 ,CACNA1I ,BLM ,NRK ,MAGI3 ,ADCY10 ,BMP2 ,RC3H2 ,RIN3 ,BMP2K ,SEMA3D ,NETO2 ,NFATC2 ,SH3BP5 ,ZNF106 ,MYOM1 ,TRAF3 ,TTC21B ,UIMC1 ,RAP1GAP ,DRAXIN ,ATF1 ,CGAS ,GABRR2 ,CNKSR3 ,CASP5 ,WDR12 ,CUL1 ,MOB1B ,BBS4 ,MAPK8IP1 ,UBASH3A ,KITLG ,AKAP10 ,PTPRE ,MTMR2 ,TBX20 ,AFAP1 ,WSB1 ,PRKCH ,TG ,IL6R ,ALS2 ,OR51E1 ,SNX25 ,PDE6A ,USP7 ,MESD ,MOK ,KIR2DL4 ,RALB ,VCAM1 ,SEL1L ,ARHGAP31 ,DTX1 ,ZBTB33 ,ADA2 ,DPYSL5 ,CUL5 ,OR7A17 ,NEK6 ,NMU ,GAST ,SNAI2 ,IGHV3-74 ,BID ,SIAH2 ,RXRG ,ERN2 ,MBTPS2 ,FLNB ,TIAL1 ,ZDHHC17 ,SAMHD1 ,IFT81 ,ENPP1 ,CSF1 ,GHRH ,BCL2L1 ,ASB4 ,DHRS3 ,SMAD5 ,PRAME ,MED1 ,CDC14B ,PTH ,PRKAA2 ,CSF2RB ,ABHD2 ,CAMLG ,TEAD1 ,YBX3 ,AIMP1 ,FYB2 ,PCID2 ,CIBAR1 ,PBLD ,FICD ,CADM1 ,PEG10 ,NET1 ,SLC1A7 ,FSTL1 ,SVEP1 ,MADD ,HCRTR1 ,CREBBP ,GORAB ,NFKBIA ,ZC3H15 ,NEDD9 ,OLFM4 ,ADGRE3 ,PPP1R17 ,ERLIN2 ,OTOP1 ,EXOC1 ,GID8 ,FAM189A2 ,NDFIP2 ,NR2C1 ,CMTM7 ,ABI1 ,ITGA4 ,OR6C75 ,ASB2 ,CYFIP2 ,OR13C9 ,RXRA ,ADGRB1 ,WNT7A ,NDFIP1 ,MAP3K4 ,ATP6V1C2 ,C16ORF72 ,OR10H2 ,PDE2A ,LRRC2 ,SDCBP ,JPT2 ,NCK1 ,FGR ,IFNAR1 ,CYTH4 ,WNT2B ,POSTN ,CD101 ,AKAP11 ,DTHD1 ,MVB12B ,ANKRD6 ,FEZ2 ,INIP ,LAMB1 ,PLCZ1 ,FCRLA ,DIDO1 ,GPR55 ,NSUN2 ,TNFSF11 ,IPM1F ,ARL13B ,SH2D3C ,ZFYVE28 ,TET1 ,ASB3 ,RAD9A ,RP1L1 ,ITGA1 ,POR ,NSG2 ,B9D1 ,PRDM15 ,SRGAP3 ,CSNK1G1 ,FLRT2 ,OR2T2 ,TMEM25 ,PPP1R13B</p> |
| GO:0032501 | multicellular organismal process | 0.00000583626014632336 | <p>WWC1 ,MTOR ,SMOC1 ,LRP12 ,PLCB1 ,NEBL ,SPOCK1 ,ZNF536 ,BRINP3 ,SGCD ,CNTN4 ,ZFPM2 ,PIEZO2 ,TENM4 ,RIPOR2 ,RP1 ,ODAD2 ,KCNMA1 ,FBN1 ,F13A1 ,RIMS1 ,SPIRE1 ,TENM3 ,RARB ,NR2V2 ,ENPEP ,SPAG16 ,USH2A ,MINAR1 ,RIMS2 ,PJA2 ,ERBIN ,RHPN2 ,ASTN1 ,CACNG2 ,NEGR1 ,MYO3B ,RTN1 ,TCF4 ,OCA2 ,DOCK10 ,E GFR ,ANGPT1 ,MACF1 ,PRKACB ,NCOR1 ,DOCK2 ,NEDD4 ,CRB1 ,BTBD9 ,SOX6 ,ARMC2 ,TUSC3 ,PHACTR1 ,DKK2 ,DNAJC13 ,MAPKBP1 ,GABRB1 ,DGKI ,C12ORF4 ,GRIA1 ,NEO1 ,CNTN6 ,SLC39A12 ,SLC8A3 ,PAK1 ,EPHA7 ,SPEN ,RAPGEF2 ,ADGRB3 ,RUNX2 ,ARSB ,GABRA6 ,CPS1 ,TAOK3 ,SLC44A1 ,LDB2 ,LRGUK ,RPTOR ,EPB41L3 ,COL4A2 ,PPP1R12B ,ADAM10 ,IL1R1 ,APBB2 ,SLC7A2 ,KDM1B ,CACNB2 ,STAU2 ,TMC1 ,SEMA5A ,SYT1 ,VCL ,ARHGAP44 ,NTF3 ,AURKA ,PYGO1 ,SLC8A1 ,SRGAP2C ,TAFA2 ,SRGAP2B ,MAP4K4 ,BMPR1B ,FMN2 ,HOMER2 ,RAB8B ,PAK3 ,RFTN1 ,TTLL7 ,DIP2B ,ITPKB ,RAP1GDS1 ,RNLS ,CHST8 ,CUBN ,IFT57 ,PRKCZ ,KLHL1 ,GRB10 ,MCPH1 ,ZSWIM6 ,RGS9 ,ABCA5 ,EBF2 ,YAP1 ,CADM2 ,ALCAM ,PLG ,PAPPA ,PDGFD ,ZNRF3 ,ABLIM1 ,GFRA1 ,SYCP1 ,NIPBL ,RNF17 ,CORO2B ,CARD18 ,SORCS3 ,MYLK3 ,MBNL1 ,ATF6 ,TPM1 ,CORIN ,ANKRD11 ,BIRC6 ,KLF15 ,PPARA ,SYNJ1 ,ADAMTS3 ,SF3B6 ,SEMA3C ,SLC24A4 ,ALPK2 ,DNAH11 ,JARID2 ,SCN2A ,CPE ,IL34 ,TANC1 ,BBS2 ,SLC9C1 ,RANBP3L ,OR4F6 ,NKG7 ,LDB3 ,BLK ,TNFR ,XIRP2 ,OXR1 ,SDC2 ,GAS2 ,KCNH1 ,DROSHA ,TTLL5 ,APBB1IP</p>                                                                                                                                                                                                                                                                                                                                                                                                                                                                                                                                                                                                                                                                                                                                                                                                                                                                                                                                                                                                                                                                                                                                                                                                                                           |

|            |                       |                        |                                                                                                                                                                                                                                                                                                                                                                                                                                                                                                                                                                                                                                                                                                                                                                                                                                                                                                                                                                                                                                                                                                                                                                                                                                                                                                                                                                                                                                                                                                                                                                                                                                                                                                                                                                                                                                                                                                                                                                                                                               |
|------------|-----------------------|------------------------|-------------------------------------------------------------------------------------------------------------------------------------------------------------------------------------------------------------------------------------------------------------------------------------------------------------------------------------------------------------------------------------------------------------------------------------------------------------------------------------------------------------------------------------------------------------------------------------------------------------------------------------------------------------------------------------------------------------------------------------------------------------------------------------------------------------------------------------------------------------------------------------------------------------------------------------------------------------------------------------------------------------------------------------------------------------------------------------------------------------------------------------------------------------------------------------------------------------------------------------------------------------------------------------------------------------------------------------------------------------------------------------------------------------------------------------------------------------------------------------------------------------------------------------------------------------------------------------------------------------------------------------------------------------------------------------------------------------------------------------------------------------------------------------------------------------------------------------------------------------------------------------------------------------------------------------------------------------------------------------------------------------------------------|
|            |                       |                        | <p>,DNAH5, GLIS1, MORC1, GALC, LATS2, ASPM, AP3B1, ATP11C, ZBTB16, MUSK, SETDB2, PRKCE, SLMAP, USP33, CD44, PTPRO, ALPK3, ABCC9, LNPEP, LIMD1, SPRED2, RPS6KA3, NHS, PTPN2, PLXNA2, OR4F15, ATXN3, ST8SIA6, SLC2A3, ARHGEF7, ATP8A1, AMBRA1, KDM7A, OPRM1, FANCA, CNNM4, SEMA3E, ALPL, TMOD2, MSH2, ATL1, LUC7L, EPN2, BICRAL, AFG3L2, MOSMO, MNAT1, ANK3, XYLT1, HMGA2, BCL11B, DOCK5, F5, AK8, PLCE1, IL17RA, CRIM1, FUT9, VAV1, MYT1L, FBXO32, HLA-B, IQSEC1, CACNA1I, PDLIM5, NRK, SLC10A7, ADCY10, BMP2, RC3H2, TRAK1, GFI1B, BMP2K, RNF38, SEMA3D, POLR3A, NFATC2, TDRD7, SLC23A2, MYOM1, TRAF3, TTC21B, B4GALT6, TSPAN2, RAP1GAP, DRAXIN, ATF1, CGAS, GABRR2, CASP5, DAW1, MYL1, FARP1, BBS4, MAPK8IP1, COL5A1, CFTR, UBASH3A, AHDC1, KITLG, GTF2I, TADA2A, MTMR2, SH3PXD2A, TBX20, LGI2, PRKCH, TGIL6R, ALS2, OR51E1, HEMGN, TOX, PTPRB, PDE6A, TBATA, SCN10A, ENPP3, MESD, KIR2DL4, NPAS2, YIPF6, VCAM1, LRIG1, DTX1, FANCL, DPYSL5, OR7A17, HECTD1, SHROOM3, XRCC4, NMU, SNAI2, IGHV3-74, BID, SIAH2, RXRG, SP3, MBTPS2, TRIM58, TIAL1, ZDHHC17, SLC22A14, KRT6B, SAMHD1, IFT81, ENPP1, KCNC1, CSF1, GHRH, BCL2L1, SPATA48, KRT25, CTDP1, ASB4, DHRS3, SMAD5, SYNJ2, SLC40A1, CABYR, MED1, FAT1, OTOG, PTH, PRKAA2, CSF2RB, SOHLH1, ABHD2, PLA2G4A, CAMLG, TEAD1, ANP32B, YBX3, AIMP1, PCID2, CIBAR1, PBLD, CADM1, SSPN, ANLN, ADAM28, SLC1A7, VSX1, FSTL1, BPNT1, SVEP1, HCRTR1, ZNF287, ZNF449, PRSS2, CREBBP, GORAB, SIAH3, TRPV5, NFKBIA, ABCC8, ALX4, NEDD9, ASS1, PPP1R17, OTOP1, KRT6A, STOX2, AGO1, CMTM7, SLC6A11, MTPN, ABI1, ITGA4, BCAP29, POU1F1, OR6C75, ASB2, CEP120, CYFIP2, ACACA, KRT85, ST8SIA4, OR13C9, RXRA, ADGRB1, WNT7A, NDFIP1, MAP3K4, FOXO6, OR10H2, PDE2A, SDCBP, DSG1, NCK1, FLVCR1, FGR, SPRR2D, RNF8, PPIP5K2, KIAA0319L, DNMT3L, LHX9, WNT2B, TNNT1, OCLN, CD101, AKAP11, FEZ2, LAMB1, KIRREL1, PLCZ1, GPR55, NSUN2, TNFSF11, PPM1F, ARL13B, TMEM63C, UGP2, OPA3, TET1, ASB3, RP1L1, ITGA1, POR, B9D1, MACROH2A1, SERPINB2, ATG5, UNK, FLRT2, OR2T2, TMEM25, DX6, RFX2, CCDC141</p> |
| GO:0032502 | developmental process | 0.00000616372889469349 | <p>WWC1, MTOR, SMOC1, LRP12, PLCB1, NEBL, SPOCK1, ZNF536, BRINP3, SGCD, CNTN4, ZFPM2, TENM4, RIPOR2, RP1, ODAD2, FBN1, CDH8, RIMS1, SPIRE1, TENM3, RARB, NAV2, ENPEP, SPAG16, USH2A, MINAR1, CDC42EP3, RIMS2, ASTN1, PARVB, NEGR1, MYO3B, RTN1, TCF4, OCA2, DOCK10, EGFR, ANGPT1, CDK12, MACF1, PRKACB, DOCK2, NEDD4, CRB1, SOX6, ARMC2, PHACTR1, DKK2, DN AJC13, GABRB1, NEO1, CNTN6, SLC39A12, SLC8A3, PAK1, EPHA7, SPEN, RAPGEF2, ADGRB3, DEUP1, RUNX2, ARSB, CPS1, TAOK3, PRICKLE2, LDB2, LRGUK, EPB41L3, COL4A2, ADAM10, STAU2, TMC1, SEMA5A, SYT1, VCL, ARHGAP44, NTF3, AURKA, CFDP1, PYGO1, SLC8A1, SRGAP2C, SRGAP2B, MAP4K4, BMPR1B, FMN2, PAK3, TTLL7, DIP2B, ITPKB, CHST8, IFT57, PRKCZ, KLHL1, MCPH1, ZSWIM6, ABCA5, EBF2, YAP1, RIPK4, CADM2, ALCAM, PLG, PDGFD, ZNRF3, ABLIM1, GFRA1, SYCP1, NIPBL, RNF17, MYLK3, MBNL1, ATF6, TPM1, ANKRD11, BIRC6, KLF15, PPARA, SYNJ1, ADAMTS3, SF3B6, SEMA3C, SLC24A4, ALPK2, DNAH11, JARID2, SCN2A, GATAD2B, CPE, IL34, TANC1, MELK, BBS2, SLC9C1, RANBP3L, LDB3, PIAS1, BLK, TNFR, XIRP2, SDC2, GAS2, KCNH1, DROSHA, TTLL5, DNAH5, GLIS1, MORC1, MYO10, GALC, LATS2, ASPM, AP3B1, ATP11C, ZBTB16, MUSK, SETDB2, USP33, CD44, PTPRO, ALPK3, COL5A3, LIMD1, SPRED2, RPS6KA3, NHS, PTPN2, PLXNA2, ATXN3, ST8SIA6, ARHGEF7, AMBRA1, KDM7A, OPRM1, FANCA, CNNM4, SEMA3E, ALPL, TMOD2, MSH2, ATL1, LUC7L, EPN2, BICRAL, AFG3L2, MOSMO, MNAT1, ANK3, XYLT1, HMGA2, BCL11B, DOCK5, AK8, PLCE1, CRIM1, FUT9, VAV1, MYT1L, ZNF160, HLA-B, IQSEC1, PDLIM5, NRK, SLC10A7, ADCY10, BMP2, RC3H2, TRAK1, GFI1B, BMP2K, RNF38, SEMA3D, NFATC2, TDRD7, SLC23A2, ANKRD26, TTC21B, B4GALT6, TSPAN2, RAP1GAP, DRAXIN, ATF1, NHSL1, CASP5, CUL1, DAW1, FARP1, BBS4, COL5A1, CFTR, AHD C1, KITLG, GTF2I, TADA2A, MTMR2, SH3PXD2A, TBX20, LGI2, P</p>                                                                                                                                                                                                                                             |

|            |                                         |                         |                                                                                                                                                                                                                                                                                                                                                                                                                                                                                                                                                                                                                                                                                                                                                                                                                                                                                                                                                                                                                                                                                                                                                                                                                                                                                                                                                                                                                                                                                                                                                                                                                                                                                                                                                                                                                                                                                                                                               |
|------------|-----------------------------------------|-------------------------|-----------------------------------------------------------------------------------------------------------------------------------------------------------------------------------------------------------------------------------------------------------------------------------------------------------------------------------------------------------------------------------------------------------------------------------------------------------------------------------------------------------------------------------------------------------------------------------------------------------------------------------------------------------------------------------------------------------------------------------------------------------------------------------------------------------------------------------------------------------------------------------------------------------------------------------------------------------------------------------------------------------------------------------------------------------------------------------------------------------------------------------------------------------------------------------------------------------------------------------------------------------------------------------------------------------------------------------------------------------------------------------------------------------------------------------------------------------------------------------------------------------------------------------------------------------------------------------------------------------------------------------------------------------------------------------------------------------------------------------------------------------------------------------------------------------------------------------------------------------------------------------------------------------------------------------------------|
|            |                                         |                         | <p>RKCH,TG,IL6R,ALS2,TFDP1,HEMGN,TOX,PTPRB,PDE6A,TBATA,SCN10A,MESD,NPAS2,YIPF6,VCAM1,LRIG1,DTX1,DPYSL5,HECTD1,SHROOM3,XRCC4,SNAI2,SIAH2,RXRG,SP3,MBTPS2,FLNB,TRIM58,TIAL1,ELF2,ZDHHC17,SLC22A14,KRT6B,XKR5,SAMHD1,IFT81,ENPP1,KCNC1,CSF1,GHRH,BCL2L1,SPATA48,KRT25,CTDP1,ASB4,DHRS3,SMAD5,SYNJ2,SLC40A1,PRAME,CABYR,MED1,ATG4B,FAT1,SCML2,PRAMEF25,PTH,SDF4,SOHLH1,ABHD2,VSTM2A,ZBTB7C,TEAD1,ANP32B,YBX3,AIMP1,PCID2,CIBAR1,CADM1,PEG10,ANLN,ADAM28,VSX1,FSTL1,BPNT1,SVEP1,ZNF449,CREBBP,ARL11,GORAB,SIAH3,NFKBIA,ABCC8,ALX4,NEDD9,ASS1,PPP1R17,OTOP1,KRT6A,STOX2,AGO1,NR2C1,CMTM7,SLC6A11,MTPN,ABI1,ITGA4,BCAP29,POU1F1,ASB2,CEP120,DHTKD1,CYFIP2,KRT85,ST8SIA4,RXRA,ADGRB1,WNT7A,NDFIP1,MAP3K4,FOXO6,PDE2A,SDCBP,NCK1,FLVCR1,FGR,SPRR2D,RNF8,KIAA0319L,DNMT3L,LHX9,WNT2B,TNNI1,POSTN,CD101,ANKRD6,FEZ2,LAMB1,FCRLA,GPR55,NSUN2,TNFSF11,ARL13B,UGP2,TET1,RP1L1,DDX10,ITGA1,POR,B9D1,MACROH2A1,ATG5,UNK,FLRT2,NUDT21,DDX6,RFX2,CCDC141</p>                                                                                                                                                                                                                                                                                                                                                                                                                                                                                                                                                                                                                                                                                                                                                                                                                                                                                                                                                                                                    |
| GO:0048523 | negative regulation of cellular process | 0.000020584420773916217 | <p>WWC1,MTOR,PLCB1,SPOCK1,ZNF536,BRINP3,CNTN4,ZFPM2,RIPOR2,FBN1,RARB,USH2A,MINAR1,CDYL2,BABAM2,ERBIN,RHPN2,EGFR,USP14,ANGPT1,CDK12,PRKACB,NCOR1,NEDD4,SOX6,DKK2,THRAP3,MAPKB1,DGKI,GRIA1,CAST,SLC8A3,TOM1L2,PAK1,EPHA7,NCOA7,SPEN,RAPGEF2,RUNX2,TAOK3,CPEB4,LDB2,RPTOR,ADAM10,APBB2,KDM1B,STAU2,USP18,SEMA5A,VCL,ARHGAP44,NTF3,ACER2,PARP15,AURKA,CFDP1,SLC8A1,SRGAP2C,SRGAP2B,MAP4K4,BMPR1B,FMN2,HOMER2,DIP2B,LARP1,ITPKB,RGS20,PDE10A,KICS2,IFT57,INTS7,PRKCZ,GRB10,MCPH1,RGS9,ABCA5,YAP1,USP25,PLG,ZNRF3,UBE20,NIPBL,CORO2B,STK38,SORCS3,ZNF684,TPM1,BIRC6,PPARA,PTPRK,TRERF1,SEMA3C,DAPK1,SLC24A4,SEC14L1,VPS13C,PHC3,ALPK2,JARID2,DNAJC15,GATAD2B,ZNF846,RANBP3L,PIAS1,BLK,TNR,MXI1,OXR1,CREG1,SLFN11,GLIS1,MORC1,LATS2,ASPM,ABC7,ZBTB16,KIR3DL2,SETDB2,PRKE,FOXK2,CD44,RGS12,PTPRO,STXBP6,LIMD1,PEX14,SPRED2,RPS6KA3,PTPN2,PLXNA2,ARHGEF7,AMBRA1,OPRM1,SEMA3E,TMEM67,ABHD17C,TMOD2,MSH2,ZNF397,HIPK3,EPN2,CLSPN,BICRAL,MOSMO,MNAT1,MDFIC,ANK3,HMGA2,BCL11B,LYPLA1,CRIM1,PRR5L,MYT1L,HLA-B,BLM,BMP2,RC3H2,ATP9A,GFI1B,RIN3,SEMA3D,NFATC2,S3BP5,SLC23A2,ANKRD26,ZNF875,UIMC1,LRRFIP1,RAP1GAP,DRAXIN,CGAS,CNKS3,BTAF1,BBS4,MAPK8IP1,COL5A1,UBASH3A,MRPL13,KITLG,PTPRE,MTMR2,ZNF608,TBX20,PRKH,TFDP1,KANK4,SNX25,PTPRB,USP7,ENPP3,PLAGL1,KIR2DL4,NPAS2,ZNF169,DTX1,ZBTB33,DPYSL5,HECTD1,SNAI2,BID,SIAH2,SP3,ERN2,TIAL1,ELF2,SAMHD1,ENPP1,TP53I11,TMEM225,CSF1,BCL2L1,CTDP1,DHRS3,SMAD5,TCERG1,SLC40A1,PRAME,MED1,CCDC14B,SCML2,PRAMEF25,PTH,PRKAA2,ABHD2,CAMLG,ZBTB7C,ANP32B,YBX3,AIMP1,PCID2,PBLD,CADM1,PEG10,FSTL1,PATL1,CREBBP,MELTF,SIAH3,NFKBIA,ABCC8,RTRAF,ZBTB21,NEDD9,ASS1,BTG3,ERLIN2,OTOP1,ZBTB49,AGO1,FAM189A2,NDFIP2,NR2C1,MTPN,ABI1,OAZ2,POU1F1,RXRA,ADGRB1,WNT7A,NDFIP1,C16ORF72,MAGEL2,PD2A,SDCBP,MLLT1,NCK1,SCAF8,FGR,RNF8,DNMT3L,LHX9,OCN,ANKRD6,ASCL3,FEZ2,INIP,KIRREL1,GPR55,NSUN2,TNFSF11,ZNF705G,PPM1F,ZFYVE28,TET1,RAD9A,ZNF705D,ITGA1,POR,PRDM15,SRGAP3,MACROH2A1,ZNF705B,SERPINB2,ATG5,UNK,BTBD10,DDX6,PPP1R13B</p> |
| GO:0022008 | neurogenesis                            | 0.000021757546731164253 | <p>MTOR,LRP12,SPOCK1,ZNF536,BRINP3,CNTN4,TENM4,RIPOR2,RP1,RIMS1,TENM3,RARB,NAV2,USH2A,MINAR1,RIMS2,ASTN1,NEGR1,RTN1,TCF4,DOCK10,MACF1,NEDD4,CRB1,SOX6,PHACTR1,GABRB1,NEO1,CNTN6,SLC39A12,SLC8A3,PAK1,EPHA7,SPEN,RAPGEF2,ADGRB3,RUNX2,ARSB,TAOK3,EPB41L3,STAU2,TMC1,SEMA5A,SYT1,VCL,ARHGAP44,NTF3,AURKA,SRGAP2C,MAP4K4,BMPR1B,PAK3,DIP2B,PRKCZ,KLHL1,ZSWIM6,YAP1,ALCAM,GFRA1,NIPBL,KLF15,SYNJ1,SEMA3C,IL34,B</p>                                                                                                                                                                                                                                                                                                                                                                                                                                                                                                                                                                                                                                                                                                                                                                                                                                                                                                                                                                                                                                                                                                                                                                                                                                                                                                                                                                                                                                                                                                                               |

|            |                                    |                                |                                                                                                                                                                                                                                                                                                                                                                                                                                                                                                                                                                                                                                                                                                                                                                                                                                                                                                                                                                                                                                                                                                                                                                                                                                                                                                                                                                                                                                                                                                                                                                                                                                                                                                                                                                                                                                                                                                |
|------------|------------------------------------|--------------------------------|------------------------------------------------------------------------------------------------------------------------------------------------------------------------------------------------------------------------------------------------------------------------------------------------------------------------------------------------------------------------------------------------------------------------------------------------------------------------------------------------------------------------------------------------------------------------------------------------------------------------------------------------------------------------------------------------------------------------------------------------------------------------------------------------------------------------------------------------------------------------------------------------------------------------------------------------------------------------------------------------------------------------------------------------------------------------------------------------------------------------------------------------------------------------------------------------------------------------------------------------------------------------------------------------------------------------------------------------------------------------------------------------------------------------------------------------------------------------------------------------------------------------------------------------------------------------------------------------------------------------------------------------------------------------------------------------------------------------------------------------------------------------------------------------------------------------------------------------------------------------------------------------|
|            |                                    |                                | LK, TNF, SDC2, ASPM, USP33, PTPRO, PLXNA2, OPRM1, SEMA3E, ATL1, AFG3L2, MOSMO, ANK3, BCL11B, FUT9, MYT1L, IQSEC1, PDLIM5, NRK, BMP2, TRAK1, SEMA3D, SLC23A2, TTC21B, B4GALT6, TSPAN2, RAP1GAP, DRAXIN, ATF1, FARP1, BBS4, MTMR2, TBX20, PRKCH, ALS2, TOX, PTPRB, VCAM1, DTX1, DPYSL5, RXRG, ZDHHC17, CSF1, MED1, VSX1, ABCC8, MTPN, ABI1, ITGA4, CEP120, CYFIP2, ADGRB1, WNT7A, FOXO6, NCK1, KIAA0319L, LHX9, WNT2B, FEZ2, LAMB1, RP1L1, ITGA1, UNK, FLRT2, DDX6, CCDC141                                                                                                                                                                                                                                                                                                                                                                                                                                                                                                                                                                                                                                                                                                                                                                                                                                                                                                                                                                                                                                                                                                                                                                                                                                                                                                                                                                                                                      |
| GO:0048583 | regulation of response to stimulus | 0.0000574<br>994398591<br>2488 | WWC1, GARNL3, MTOR, PLCB1, ZNF536, KSR1, RIPOR2, FBN1, RIMS1, SPIRE1, MINAR1, RIMS2, PJA2, BABAM2, ERBIN, CACNG2, SUSU4, NEK4, EGFR, DENND1A, USP14, ANGPT1, MACF1, PRKACB, NCOR1, DOCK2, NEDD4, DKK2, MAPKBP1, AOA, DGKI, C12ORF4, NEO1, CNTN6, SLC8A3, PAK1, EPHA7, NCOA7, RALGPS1, RAPGEF2, RUNX2, TAOK3, RPTOR, ADAM10, IL1R1, MTUS1, USP18, SEMA5A, ARHGAP44, NTF3, AURKA, MAP4K4, BMPR1B, FMN2, HOMER2, PAK3, RFTN1, ITPKB, RGS20, PDE10A, RAP1GDS1, KICS2, PRKCZ, BTLA, GRB10, MCPH1, RGS9, YAP1, USP25, PLG, PDGFD, ZNF3, UBE20, MICU1, CORO2B, STK38, HRH4, ATF6, BIRC6, KLF15, PPARA, ADAMTS3, ARHGEF12, SEMA3C, DAPK1, SLC24A4, SEC14L1, VPS13C, ALPK2, JARID2, IL34, BBS2, NKG7, USP8, BLK, TNR, OXR1, GAS2, DROSHA, LATS2, GSG1L, ASPM, AP3B1, DENND2B, GNG7, PRKCE, USP33, CD44, RGS12, PTPRO, NLRP13, L1MD1, SPRED2, RPS6KA3, PTPN2, MCF2L, ATXN3, OPRM1, FANCA, SEMA3E, TMOD2, MSH2, RELL1, HIPK3, EPN2, MOSMO, MDFIC, HMG2, PLCE1, IL17RA, CRIM1, PRR5L, VAV1, FBXO32, HLAB, IQSEC1, NRK, MAGI3, BMP2, RC3H2, RIN3, BMP2K, SEMA3D, NFKB1, NFATC2, TRAF3, TTC21B, UIMC1, RAP1GAP, DRAXIN, CGAS, CNKSR3, CASP5, BBS4, MAPK8IP1, UBASH3A, KITLG, PTPRE, MTMR2, TBX20, AFAP1, PRKCH, IL6R, ALS2, SNX25, USP7, ENPP3, KIR2DL4, RALB, NPAS2, ARHGAP31, DTX1, NEK6, SNAI2, IGHV3-74, BID, SIAH2, ERN2, MBTPS2, TIAL1, ZDHHC17, SAMHD1, IFT81, ENPP1, CSF1, GHRH, BCL2L1, CTDP1, DHRS3, PRAME, MED1, CFH, PTH, PRKAA2, PLA2G4A, YBX3, FYB2, PCID2, CIBAR1, PBLD, FICD, CADM1, PEG10, NET1, FSTL1, MADD, HCTR1, CREBBP, GORAB, NFKBIA, ABCC8, NEDD9, OTOF1, GID8, FAM189A2, NDFIP2, NR2C1, MTPN, CYFIP2, RXRA, WNT7A, NDFIP1, MAP3K4, ATP6V1C2, C16ORF72, PDE2A, SDCBP, JPT2, NSMCE1, NCK1, FGR, C2, RNF8, CYTH4, TNNT1, OCLN, POSTN, MVB12B, CD5L, ANKRD6, LAMB1, GPR55, TNFSF11, PPM1F, ZFYVE28, TET1, RAD9A, ITGA1, POR, PRDM15, SRGAP3, MACROH2A1, CSNK1G1, SERPINB2, ATG5, TMEM25 |
| GO:0030182 | neuron differentiation             | 0.0001269<br>386911549<br>6697 | LRP12, SPOCK1, ZNF536, BRINP3, CNTN4, TENM4, RIPOR2, RP1, RIMS1, TENM3, USH2A, MINAR1, RIMS2, NEGR1, RTN1, TCF4, DOCK10, MACF1, NEDD4, CRB1, PHACTR1, GABRB1, NEO1, CNTN6, SLC39A12, PAK1, EPHA7, RAPGEF2, ADGRB3, RUNX2, ARSB, TAOK3, EPB41L3, STAU2, TMC1, SEMA5A, SYT1, VCL, ARHGAP44, NTF3, AURKA, SRGAP2C, MAP4K4, BMPR1B, PAK3, DIP2B, PRKCZ, KLHL1, ZSWIM6, ALCAM, GFRA1, SEMA3C, BLK, TNF, SDC2, ASPM, USP33, PTPRO, PLXNA2, SEMA3E, ATL1, AFG3L2, MOSMO, ANK3, BCL11B, FUT9, MYT1L, IQSEC1, PDLIM5, NRK, BMP2, SEMA3D, SLC23A2, TTC21B, B4GALT6, TSPAN2, RAP1GAP, DRAXIN, ATF1, FARP1, BBS4, MTMR2, TBX20, ALS2, TOX, VCAM1, DTX1, DPYSL5, RXRG, ZDHHC17, MED1, VSX1, MTPN, ABI1, ITGA4, CYFIP2, ADGRB1, WNT7A, FOXO6, NCK1, LHX9, WNT2B, FEZ2, LAMB1, RP1L1, ITGA1, UNK, FLRT2, DDX6, CCDC141                                                                                                                                                                                                                                                                                                                                                                                                                                                                                                                                                                                                                                                                                                                                                                                                                                                                                                                                                                                                                                                                                        |
| GO:0036211 | protein modification process       | 0.0001707<br>783216545<br>2602 | MTOR, TMTC1, KSR1, ERC1, F13A1, PIK3C3, MINAR1, PJA2, BABAM2, MAP3K9, MYO3B, NEK4, EGFR, USP14, ANGPT1, CDK12, PRKACB, NEK7, NEDD4, NSMCE2, B3GALT5, TUSC3, SLC8A3, PAK1, EPHA7, NCOA7, RAPGEF2, TAOK3, RPTOR, ADAM10, KDM1B, KLHL13, USP18, NTF3, ACER2, PARP15, AURKA, SLC8A1, MAP4K4, BMPR1B, PAK3, TLL7, DIP2B, ITPKB, HHAT, PRKCZ, SPOP, MAN2A2, ST8SIA5, SENP6, GALNT14, PPM1L, RIPK4, USP25, PDGFD, ZNF3, XXYLT1, UBE20, GFRA1, NIPBL, STK38, MYLK3, KANSL1, CNG2, TLK1, ZDHHC14, BIRC6, KLF15, PPP6R3, RSRC1, PTPRK, TRERF1, PDZRN3, DAPK1, STK32B, ALPK2, GATAD2B, CPE, IL34                                                                                                                                                                                                                                                                                                                                                                                                                                                                                                                                                                                                                                                                                                                                                                                                                                                                                                                                                                                                                                                                                                                                                                                                                                                                                                          |

|            |                                     |                        |                                                                                                                                                                                                                                                                                                                                                                                                                                                                                                                                                                                                                                                                                                                                                                                                                                                                                                                                                                                                                                                                                                 |
|------------|-------------------------------------|------------------------|-------------------------------------------------------------------------------------------------------------------------------------------------------------------------------------------------------------------------------------------------------------------------------------------------------------------------------------------------------------------------------------------------------------------------------------------------------------------------------------------------------------------------------------------------------------------------------------------------------------------------------------------------------------------------------------------------------------------------------------------------------------------------------------------------------------------------------------------------------------------------------------------------------------------------------------------------------------------------------------------------------------------------------------------------------------------------------------------------|
|            |                                     |                        | ,MELK,USP8,PIAS1,UBE2R2,BLK,OXR1,TTL5,EIPR1,ATE1,LATS2,AP3B1,ZBTB16,MUSK,SMARCA1,SETDB2,PRKCE,USP33,CD44,PTPRO,ALPK3,PRRC1,LNPEP,SPRED2,RPS6KA3,PTPN2,ATXN3,ST8SIA6,ALG10B,AMBRA1,GALNT10,KDM7A,FANCM,FANCA,RPRD1B,ABHD17C,HIPK3,CLSPN,MNAT1,HMGA2,FOLH1,STK32A,LYPLA1,CWC27,PLCE1,FUT9,PRR5L,GXYLT2,FBXO32,BLM,NRK,BMP2,RC3H2,TRAK1,BMP2K,RNF38,SH3BP5,TRAF3,UIMC1,B4GALT6,CNKSR3,CUL1,DAW1,MOB1B,MAPK8IP1,KITLG,TADA2A,UBE2E1,PTPRE,MTMR2,WSB1,TRPM6,PRKCH,IL6R,ALS2,SNX25,PTPRB,USP7,MOK,RALB,DTX1,FANCL,CUL5,NEK6,HECTD1,SNAI2,SIAH2,PGAP4,ERN2,TRIM58,ZDHC17,PTAR1,ENPP1,CSF1,PPIL6,EOGT,CTDP1,ASB4,SMAD5,PRAME,KLHL7,ATG4B,CDC14B,PRKAA2,CSF2RB,RNF182,PHF20L1,CAMLG,FICD,CADM1,ELOC,MADD,CREBBP,SIAH3,RTRAF,NEDD9,PCMTD2,PDP2,NDFIP2,MARCHF6,ABI1,PPME1,UBE2J2,ASB2,ST8SIA4,ADGRB1,NDFIP1,MAP3K4,TRIM43B,TRIM43,MAGEL2,SDCBP,NSMCE1,MLLT1,NCK1,FGR,RNF8,OCN,KIRREL1,TNFSF11,DPY19L1,PPM1F,SH2D3C,ZFYVE28,STT3A,TET1,ASB3,SPOPL,ITGA1,POR,SENP8,USP49,MACROH2A1,CSNK1G1,CAMK1G,ATG5,TTL11                                                                                                 |
| GO:0050793 | regulation of developmental process | 0.0001891491531018646  | WWC1,MTOR,SMOC1,PLCB1,ZNF536,BRINP3,CNTN4,ZFPM2,TENM4,RIPOR2,FBN1,RIMS1,SPIRE1,RARB,USH2A,MINAR1,CDC42EP3,RIMS2,PARVB,TCF4,EGFR,CDK12,MACF1,NEDD4,SOX6,SLC39A12,PAK1,EPHA7,SPEN,RAPGEF2,ADGRB3,RUNX2,PRICKLE2,EPB41L3,COL4A2,ADAM10,STAU2,SEMA5A,SYT1,VCL,ARHGAP44,NTF3,AURKA,CFDP1,SLC8A1,SRGAP2C,BMPR1B,PAK3,DIP2B,ITPKB,PRKCZ,ABCA5,YAP1,ZNRF3,NIPBL,MYLK3,TPM1,PPARA,SYNJ1,SEMA3C,ALPK2,JARID2,GATAD2B,IL34,BBS2,RANBP3L,TNR,SDC2,GAS2,DROSHA,GLIS1,MYO10,LATS2,ASPM,AP3B1,ATP11C,ZBTB16,MUSK,CD44,LIMD1,SPRED2,RPS6KA3,PTPN2,PLXNA2,ARHGEF7,AMBRA1,OPRM1,FANCA,SEMA3E,MSH2,LUC7L,EPN2,BICRAL,AFG3L2,MOSMO,HMGA2,BCL11B,CRIM1,HLA-B,PDLIM5,BMP2,RC3H2,GFI1B,BMP2K,SEMA3D,NFATC2,SLC23A2,ANKRD26,RAP1GAP,DRAXIN,BBS4,COL5A1,CFTR,KITLG,GTIF2I,TADA2A,MTMR2,TBX20,PRKCH,TG,IL6R,HEMGN,TOX,DTX1,DPYSL5,SHROOM3,SNAI2,RXRG,TRIM58,ENPP1,CSF1,GHRH,BCL2L1,CTDP1,ASB4,SMAD5,PRAME,MED1,PRAMEF25,PTH,VSTM2A,ZBTB7C,ANP32B,YBX3,PCID2,NFKBIA,ABCC8,NEDD9,AGO1,MTPN,RXRA,ADGRB1,WNT7A,NDFIP1,FOXO6,SDCBP,FLVCR1,FGR,WNT2B,CD101,ANKRD6,LAMB1,GPR55,NUN2,TNFSF11,TET1,POR,MACROH2A1,FLRT2,NUDT21,DDX6 |
| GO:0048699 | generation of neurons               | 0.0002772328347334582  | LRP12,SPOCK1,ZNF536,BRINP3,CNTN4,TENM4,RIPOR2,RP1,RIMS1,TENM3,USH2A,MINAR1,RIMS2,ASTN1,NEGR1,RTN1,TCF4,DOCK10,MACF1,NEDD4,CRB1,PHACTR1,GABRB1,NEO1,CNTN6,SLC39A12,PAK1,EPHA7,RAPGEF2,ADGRB3,RUNX2,ARSB,TAOK3,EPB41L3,STAU2,TMC1,SEMA5A,SYT1,VCL,ARHGAP44,NTF3,AURKA,SRGAP2C,MAP4K4,BMPR1B,PAK3,DIP2B,PRKCZ,KLHL1,ZSWIM6,ALCAM,GFRA1,NIPBL,SEMA3C,BLK,TNR,SDC2,ASPM,USP33,PTPRO,PLXNA2,SEMA3E,ATL1,AFG3L2,MOSMO,ANK3,BCL11B,FUT9,MYT1L,IQSEC1,PDLIM5,NRK,BMP2,SEMA3D,SLC23A2,TTC21B,B4GALT6,TSPAN2,RAP1GAP,DRAXIN,ATF1,FARP1,BBS4,MTMR2,TBX20,ALS2,TOX,VCAM1,DTX1,DPYSL5,RXRG,ZDHC17,MED1,VSX1,MTPN,ABI1,ITGA4,CYFIP2,ADGRB1,WNT7A,FOXO6,NCK1,KIAA0319L,LHX9,WNT2B,FEZ2,LAMB1,RP1L1,ITGA1,UNK,FLRT2,DDX6,CCDC141                                                                                                                                                                                                                                                                                                                                                                                 |
| GO:0000902 | cell morphogenesis                  | 0.00028595336331746463 | CNTN4,RIPOR2,CDH8,RIMS1,CDC42EP3,RIMS2,PARVB,DOCK10,EGFR,MACF1,NEDD4,CRB1,PHACTR1,NEO1,CNTN6,PAK1,EPHA7,RAPGEF2,ADGRB3,TAOK3,EPB41L3,STAU2,SEMA5A,SYT1,VCL,ARHGAP44,NTF3,AURKA,CFDP1,MAP4K4,BMPR1B,PAK3,DIP2B,PRKCZ,YAP1,ALCAM,TPM1,SEMA3C,TNR,SDC2,GAS2,MYO10,LATS2,AP3B1,USP33,CD44,PTPRO,LIMD1,PLXNA2,ARHGEF7,SEMA3E,ATL1,AFG3L2,ANK3,BCL11B,PDLIM5,NRK,SEMA3D,SLC23A2,B4GALT6,DRAXIN,FARP1,ALS2,DPYSL5,SHROOM3,FLNB,ZDHC17,MED1,FAT1,ABI1,ITGA4,CYFI                                                                                                                                                                                                                                                                                                                                                                                                                                                                                                                                                                                                                                        |

|            |                                                       |                        |                                                                                                                                                                                                                                                                                                                                                                                                                                                                                                                                                                                                                                                                                                                                                                                                                                                                                                                                                                                                                                                                                                                                                                                                                                                                                                                                                     |
|------------|-------------------------------------------------------|------------------------|-----------------------------------------------------------------------------------------------------------------------------------------------------------------------------------------------------------------------------------------------------------------------------------------------------------------------------------------------------------------------------------------------------------------------------------------------------------------------------------------------------------------------------------------------------------------------------------------------------------------------------------------------------------------------------------------------------------------------------------------------------------------------------------------------------------------------------------------------------------------------------------------------------------------------------------------------------------------------------------------------------------------------------------------------------------------------------------------------------------------------------------------------------------------------------------------------------------------------------------------------------------------------------------------------------------------------------------------------------|
|            |                                                       |                        | <i>P2, ADGRB1, WNT7A, FGR, LHX9, FEZ2, ARL13B, ITGA1, UNK, FLRT2, CCDC141</i>                                                                                                                                                                                                                                                                                                                                                                                                                                                                                                                                                                                                                                                                                                                                                                                                                                                                                                                                                                                                                                                                                                                                                                                                                                                                       |
| GO:0032989 | cellular component morphogenesis                      | 0.0002937769272867346  | <i>NEBL, CNTN4, TENM4, RIMS1, RIMS2, DOCK10, MACF1, NEDD4, PHACTR1, NEO1, CNTN6, PAK1, EPHA7, RAPGEF2, ADGRB3, TAOK3, EPB41L3, STAU2, SEMA5A, SYT1, VCL, ARHGAP44, NTF3, AURKA, MAP4K4, BMPR1B, PAK3, DIP2B, PRKCZ, ALCAM, MYLK3, TPM1, SEMA3C, LDB3, TNFR, SDC2, USP33, CD44, PTPRO, PLXNA2, ARHGEF7, SEMA3E, TMOD2, ATL1, AFG3L2, ANK3, BCL11B, PDLIM5, NRK, SEMA3D, SLC23A2, B4GALT6, DRAXIN, FARP1, MTMR2, ALS2, DPYSL5, ZDHHC17, BCL2L1, ABI1, ITGA4, CYFIP2, ADGRB1, WNT7A, LHX9, FEZ2, ITGA1, FLRT2, RFX2, CCDC141</i>                                                                                                                                                                                                                                                                                                                                                                                                                                                                                                                                                                                                                                                                                                                                                                                                                       |
| GO:0009653 | anatomical structure morphogenesis                    | 0.00035584826056229393 | <i>MTOR, NEBL, SGCD, CNTN4, ZFPM2, TENM4, RIPOR2, RP1, FBN1, CDH8, RIMS1, SPIRE1, TENM3, RARB, ENPEP, USH2A, MINAR1, CDC42EP3, RIMS2, PARVB, MYO3B, DOCK10, EGFR, ANGPT1, MACF1, PRKACB, DOCK2, NEDD4, CRB1, SOX6, PHACTR1, NEO1, CNTN6, SLC39A12, PAK1, EPHA7, RAPGEF2, ADGRB3, RUNX2, TAOK3, PRICKLE2, EPB41L3, COL4A2, STAU2, SEMA5A, SYT1, VCL, ARHGAP44, NTF3, AURKA, CFDP1, MAP4K4, BMPR1B, PAK3, DIP2B, IFIT57, PRKCZ, YAP1, RIPK4, ALCAM, ZNRF3, ABLIM1, NIPBL, MYLK3, MBNL1, TPM1, ANKRD11, PPARA, SF3B6, SEMA3C, SLC24A4, ALPK2, DNAH11, CPE, TANC1, BBS2, LDB3, TNFR, XIRP2, SDC2, GAS2, KCNH1, MYO10, LATS2, AP3B1, ZBTB16, SETDB2, USP33, CD44, PTPRO, LIMD1, PLXNA2, ARHGEF7, CNNM4, SEMA3E, ALPL, TMOD2, ATL1, EPN2, AFG3L2, ANK3, HMGA2, BCL11B, DOCK5, PDLIM5, NRK, BMP2, SEMA3D, NFATC2, TDRD7, SLC23A2, TTC21B, B4GALT6, DRAXIN, CUL1, FARP1, BBS4, COL5A1, CFTR, AHDC1, GTF2I, MTMR2, SH3PXD2A, TBX20, ALS2, PTPRB, SCN10A, LRIG1, DPYSL5, HECTD1, SHROOM3, SNAI2, SP3, FLNB, ZDHHC17, CSF1, BCL2L1, KRT25, ASB4, DHRS3, SMAD5, SLC40A1, MED1, FAT1, SCML2, AIMP1, CIBAR1, VSX1, SVEP1, CREBBP, GORAB, ABCC8, ALX4, OTOP1, KRT6A, AGO1, MTPN, ABI1, ITGA4, ASB2, CYFIP2, ADGRB1, WNT7A, FLVCR1, FGR, LHX9, WNT2B, TNNT1, ANKRD6, FEZ2, LAMB1, TNFSF11, ARL13B, TET1, ITGA1, POR, B9D1, MACROH2A1, UNK, FLRT2, RFX2, CCDC141</i> |
| GO:0120039 | plasma membrane bounded cell projection morphogenesis | 0.00048082947154752314 | <i>CNTN4, RIMS1, RIMS2, DOCK10, MACF1, NEDD4, PHACTR1, NEO1, CNTN6, PAK1, EPHA7, RAPGEF2, ADGRB3, TAOK3, EPB41L3, STAU2, SEMA5A, SYT1, VCL, ARHGAP44, NTF3, AURKA, MAP4K4, BMPR1B, PAK3, DIP2B, PRKCZ, ALCAM, SEMA3C, TNFR, SDC2, USP33, CD44, PTPRO, PLXNA2, ARHGEF7, SEMA3E, ATL1, AFG3L2, ANK3, BCL11B, PDLIM5, NRK, SEMA3D, SLC23A2, B4GALT6, DRAXIN, FARP1, ALS2, DPYSL5, ZDHHC17, ABI1, ITGA4, CYFIP2, ADGRB1, WNT7A, LHX9, FEZ2, ITGA1, FLRT2, CCDC141</i>                                                                                                                                                                                                                                                                                                                                                                                                                                                                                                                                                                                                                                                                                                                                                                                                                                                                                   |
| GO:0048858 | cell projection morphogenesis                         | 0.0006261254021740971  | <i>CNTN4, RIMS1, RIMS2, DOCK10, MACF1, NEDD4, PHACTR1, NEO1, CNTN6, PAK1, EPHA7, RAPGEF2, ADGRB3, TAOK3, EPB41L3, STAU2, SEMA5A, SYT1, VCL, ARHGAP44, NTF3, AURKA, MAP4K4, BMPR1B, PAK3, DIP2B, PRKCZ, ALCAM, SEMA3C, TNFR, SDC2, USP33, CD44, PTPRO, PLXNA2, ARHGEF7, SEMA3E, ATL1, AFG3L2, ANK3, BCL11B, PDLIM5, NRK, SEMA3D, SLC23A2, B4GALT6, DRAXIN, FARP1, ALS2, DPYSL5, ZDHHC17, ABI1, ITGA4, CYFIP2, ADGRB1, WNT7A, LHX9, FEZ2, ITGA1, FLRT2, CCDC141</i>                                                                                                                                                                                                                                                                                                                                                                                                                                                                                                                                                                                                                                                                                                                                                                                                                                                                                   |
| GO:0035556 | intracellular signal transduction                     | 0.0006682023814466897  | <i>WWC1, GARNL3, MTOR, PLCB1, KSR1, SGCD, RIPOR2, RP1, ERC1, DCDC1, PIK3C3, MINAR1, CDC42EP3, PJA2, BABAM2, ERBIN, MAP3K9, DOCK10, EGFR, DENND1A, ANGPT1, PRKACB, NCOR1, DOCK2, NEDD4, MAPKBP1, DGKI, PAK1, EPHA7, CTNNA1, RALGPS1, RAPGEF2, TAOK3, PATJ, RPTOR, APBB2, SEMA5A, ARHGAP44, NTF3, ACER2, AURKA, SLC8A1, MAP4K4, FMN2, HOMER2, PAK3, LARP1, ITPKB, PDE10A, RAP1GDS1, KICS2, INTS7, PRKCZ, GRB10, RGS9, YAP1, PPM1L, PDGFD, STK38, HRH4, TLK1, PPARA, ARHGEF12, DAPK1, SLC24A4, STK32B, SCN2A, IL34, MELK, USP8, BLK, KCNH1, LATS2, DENND2B, PRKCE, CD44, LNPEP, LIMD1, SPRED2, RPS6KA3, PTPN2, MCF2L, ARHGEF7, OPRM1, SEMA3E, MSH2, REL1, HIPK3, CLSPN, MDFIC, HMGA2, DOCK5, STK32A, PLCE1, PRK5L, VAV1, IQSEC1, BLM, NRK, MAGI3, ADCY10, BMP2, RC3H2, NFATC2, SH3BP5, MYOM1, TRAF3, UIMC1, RAP1GAP, ATF1, CGAS, CNKSR3, CUL1, MOB1B, MAPK8IP1, KITLG, WSB1, PRKCH, IL6R,</i>                                                                                                                                                                                                                                                                                                                                                                                                                                                          |

|            |                           |                       |                                                                                                                                                                                                                                                                                                                                                                                                                                                                                                                                                                                                                                                                                                                                                                                                                                                                                                                                                                                                                                                                                                                                                                                                                                                                                                                                                                                                                                                                                                                                                                                                                                                                                                                                                                                                                                                                                                                                                                                                                                                                                                                                                                                                                                                              |
|------------|---------------------------|-----------------------|--------------------------------------------------------------------------------------------------------------------------------------------------------------------------------------------------------------------------------------------------------------------------------------------------------------------------------------------------------------------------------------------------------------------------------------------------------------------------------------------------------------------------------------------------------------------------------------------------------------------------------------------------------------------------------------------------------------------------------------------------------------------------------------------------------------------------------------------------------------------------------------------------------------------------------------------------------------------------------------------------------------------------------------------------------------------------------------------------------------------------------------------------------------------------------------------------------------------------------------------------------------------------------------------------------------------------------------------------------------------------------------------------------------------------------------------------------------------------------------------------------------------------------------------------------------------------------------------------------------------------------------------------------------------------------------------------------------------------------------------------------------------------------------------------------------------------------------------------------------------------------------------------------------------------------------------------------------------------------------------------------------------------------------------------------------------------------------------------------------------------------------------------------------------------------------------------------------------------------------------------------------|
|            |                           |                       | <p>ALS2, USP7, MOK, RALB, VCAM1, ARHGAP31, ZBTB33, CUL5, NEK6, SNAI2, BID, SIAH2, ERN2, TIAL1, ZDHHC17, CSF1, BCL2L1, ASB4, SMAD5, CDC14B, PTH, PRKAA2, TEAD1, YBX3, PCID2, PBLD, NET1, MADD, HCRTR1, NFKBIA, PPP1R17, EXOC1, NDFIP2, ASB2, WNT7A, NDFIP1, MAP3K4, C16ORF72, PDE2A, SDCBP, JPT2, NCK1, FGR, CYTH4, AKAP11, ANKRD6, INIP, PLCZ1, GPR55, NSUN2, TNFSF11, PPM1F, SH2D3C, ASB3, RAD9A, RP1L1, ITGA1, PRDM15, SRGAP3, PPP1R13B</p>                                                                                                                                                                                                                                                                                                                                                                                                                                                                                                                                                                                                                                                                                                                                                                                                                                                                                                                                                                                                                                                                                                                                                                                                                                                                                                                                                                                                                                                                                                                                                                                                                                                                                                                                                                                                                |
| GO:0006810 | transport                 | 0.0007440132763410945 | <p>WWC1, MICU2, NSG1, LRP12, SLC25A21, TMPRSS2, ABCA13, CACNA2D3, KCNH5, SLC37A1, PIEZO2, ERC1, SLC44A5, KCNMA1, COG5, RIMS1, PIK3C3, SPIRE1, EXOC6B, SPAG16, TRAPPC8, RIMS2, SV2C, ERBIN, FCHO2, CACNG2, MYO5C, OCA2, EGFR, DENND1A, ANGPT1, MACF1, DOCK2, NEDD4, BTBD9, TUSC3, DNAJC13, GABRB1, DGKI, C12ORF4, GRIA1, SLC39A12, SLC8A3, TOM1L2, PAK1, GRAMD1B, ARSB, GABRA6, LDLRAD3, AGK, RANBP17, SLC44A1, KIF4A, ADAM10, SLC7A2, CACNB2, STAU2, TMC1, SYT1, ARHGAP44, NTF3, SLC8A1, FMN2, HOMER2, RAB8B, RFTN1, RAP1GDS1, CLIC6, CUBN, SCP2, IFT57, PRKCZ, GRB10, CNST, ABCA5, VPS35L, ABCD3, RABGAP1L, SGTB, TRPC7, SLC45A4, UBE2O, NIPAL2, IPO11, MICU1, TLK1, LRRC38, ZDHHC14, CORIN, KLF15, PPARA, SNX30, KCNS3, SYNJ1, RSRC1, DAPK1, SLC24A4, SEC14L1, VPS13C, DNAH11, SCN2A, RAB22A, DNAJC15, AMPH, CPE, BBS2, SLC9C1, RANBP3L, NKG7, SLC36A1, BLK, KCNH1, EIPR1, DNAH5, MYO10, PLEKHA8, GSG1L, AP3B1, ATP11C, ABCB7, PRKCE, SLMAP, USP33, ABCC9, STXBP6, PEX14, SLC2A3, ARHGEF7, ALG10B, ATP8A1, RFTN2, OPRM1, BIN2, CYBRD1, CNNM4, EPN2, ABCA10, CD163, AFG3L2, MDFIC, ANK3, NIPA2, COG2, VPS41, LYPLA1, PRR5L, VPS37A, VAV1, CACNA1I, BHLHE40-AS1, SLC10A7, ADCY10, STX12, BMP2, ATP9A, TRAK1, RIN3, BMP2K, SLC15A5, NETO2, AP4E1, SLC23A2, MYO1, PRG4, TTC21B, SNX8, CCDC186, KCNH8, SLC37A2, GABRR2, CNKSR3, DAW1, BBS4, LRRC8B, MAPK8IP1, CFTR, TBC1D13, NMD3, REPS1, MTMR2, HEPHL1, TRPM6, SLC12A1, TG, ALS2, SNX25, OSCP1, SCN10A, USP7, MON2, MESD, RALB, YIPF6, SEL1L, SLC13A5, NPIPA1, CUL5, IGHV3-74, BID, OSBPL10, COX5A, TRIM58, ZDHHC17, FYCO1, SH3GLB1, SLC22A14, XKR5, IFT81, ENPP1, KCNC1, GHRH, BCL2L1, SYNJ2, SLC40A1, CABYR, CIDEA, MED1, IPCEF1, ATG4B, PTH, PLA2G4A, SLC25A52, CAMLG, COX7A2L, ANP32B, AIMP1, LASP1, PCID2, PEG10, SLC1A7, MELTF, ARL11, SIAH3, TRPV5, NFKBIA, ABC8, RTRAF, SLC14A2, SARA1, TRAPPC3, OTOP1, EXOC1, FAM189A2, NDFIP2, SLC6A11, ITGA4, OAZ2, BCAP29, UBE2J2, TM9SF4, CEP120, STOML1, RXRA, ADGRB1, WNT7A, NDFIP1, ATP6V1C2, MAGEL2, SDCBP, JPT2, FLVCR1, FGR, SNAP29, C2, RN7SL767P, PLEKHA3, OCLN, STON1-GTF2A1L, MFSD9, MVB12B, CD5L, SCARA5, HEATR5A, PLCZ1, SLC9A5, NSUN2, ANO10, TNFSF11, PPM1F, XPO7, TMEM63C, SLC16A9, IFT46, SLC14A1, NSG2, CSNK1G1, ATP6V0D2, ATG5, NUP43, DDX6</p> |
| GO:0032990 | cell part morphogenesis   | 0.0007658269034249816 | <p>CNTN4, RIMS1, RIMS2, DOCK10, MACF1, NEDD4, PHACTR1, NEO1, CNTN6, PAK1, EPHA7, RAPGEF2, ADGRB3, TAOK3, EPB41L3, STAU2, SEMA5A, SYT1, VCL, ARHGAP44, NTF3, AURKA, MAP4K4, BMPR1B, PAK3, DIP2B, PRKCZ, ALCAM, SEMA3C, TNFR, SDC2, USP33, CD44, PTPRO, PLXNA2, ARHGEF7, SEMA3E, ATL1, AFG3L2, ANK3, BCL11B, PDLIM5, NRK, SEMA3D, SLC23A2, B4GALT6, DRAXIN, FARP1, ALS2, DPYSL5, ZDHHC17, BCL2L1, ABI1, ITGA4, CYFIP2, ADGRB1, WNT7A, LHX9, FEZ2, ITGA1, FLRT2, CCDC141</p>                                                                                                                                                                                                                                                                                                                                                                                                                                                                                                                                                                                                                                                                                                                                                                                                                                                                                                                                                                                                                                                                                                                                                                                                                                                                                                                                                                                                                                                                                                                                                                                                                                                                                                                                                                                    |
| GO:0007010 | cytoskeleton organization | 0.0008827880245925006 | <p>LRRC49, MTOR, NEBL, RIPOR2, RP1, ODAD2, SPIRE1, SPAG16, CDC42EP3, ERBIN, RHPN2, PARVB, MYO3B, MYO5C, MACF1, NEK7, NCOR1, DOCK2, DIAPH3, ARMC2, PHACTR1, SLC39A12, PAK1, DEUP1, LRGUK, EPB41L3, KIF4A, PHACTR2, STAU2, SEMA5A, ARHGAP44, NTF3, AURKA, SRGAP2C, CCSER2, FMN2, PAK3, TTLL7, RAP1GDS1, PRKCZ, KLHL1, MCPH1, SENP6, ABLIM1, CORO2B, MYLK3, TPM1, BBS2, LDB3, XIRP2, GAS2, TTLL5, DNAH5, ASPM, PRKCE, USP33, LIMD1, PEX14, ATXN3, ARHGEF7, SEMA3E, TMEM67, TMOD2, ANK3, PLCE1, IQSEC1, PDLIM5, NRK, DNAL1, TUBGCP3, D</p>                                                                                                                                                                                                                                                                                                                                                                                                                                                                                                                                                                                                                                                                                                                                                                                                                                                                                                                                                                                                                                                                                                                                                                                                                                                                                                                                                                                                                                                                                                                                                                                                                                                                                                                       |

|            |                                         |                       |                                                                                                                                                                                                                                                                                                                                                                                                                                                                                                                                                                                                                                                                                                                                                                                                                                                                                                                                                                                                                                                                                                                                                                                                                                                                                                                                                                                                                                                                                                                                                                                                                                                                                                                                                                                                                                                                                                                                                                                                                                                                                                                                                                                                                                                                                                                                                                                                                                                                                       |
|------------|-----------------------------------------|-----------------------|---------------------------------------------------------------------------------------------------------------------------------------------------------------------------------------------------------------------------------------------------------------------------------------------------------------------------------------------------------------------------------------------------------------------------------------------------------------------------------------------------------------------------------------------------------------------------------------------------------------------------------------------------------------------------------------------------------------------------------------------------------------------------------------------------------------------------------------------------------------------------------------------------------------------------------------------------------------------------------------------------------------------------------------------------------------------------------------------------------------------------------------------------------------------------------------------------------------------------------------------------------------------------------------------------------------------------------------------------------------------------------------------------------------------------------------------------------------------------------------------------------------------------------------------------------------------------------------------------------------------------------------------------------------------------------------------------------------------------------------------------------------------------------------------------------------------------------------------------------------------------------------------------------------------------------------------------------------------------------------------------------------------------------------------------------------------------------------------------------------------------------------------------------------------------------------------------------------------------------------------------------------------------------------------------------------------------------------------------------------------------------------------------------------------------------------------------------------------------------------|
|            |                                         |                       | NAH8, KIF15, DAW1, FARP1, GOLGA8B, BBS4, AFAP1, KANK4, MAP7, CFAP74, KIF11, NEK6, SHROOM3, FLNB, KRT6B, KRT25, CDC14B, FAT1, PRKAA2, KIFC1, TUBB6, ANLN, SGO1, NEDD9, KRT6A, MTPN, ABI1, ASB2, CEP120, CYFIP2, KRT85, MAGEL2, SDCBP, NCK1, INTS13, OCLN, AKAP11, KIRREL1, PSTPIP2, PPM1F, RP1L1, TOGARAM1, TTLL11                                                                                                                                                                                                                                                                                                                                                                                                                                                                                                                                                                                                                                                                                                                                                                                                                                                                                                                                                                                                                                                                                                                                                                                                                                                                                                                                                                                                                                                                                                                                                                                                                                                                                                                                                                                                                                                                                                                                                                                                                                                                                                                                                                     |
| GO:0048812 | neuron projection morphogenesis         | 0.0010092436490375019 | CNTN4, RIMS1, RIMS2, DOCK10, MACF1, NEDD4, PHACTR1, NEO1, CNTN6, PAK1, EPHA7, RAPGEF2, ADGRB3, TAOK3, EPB41L3, STAU2, SEMA5A, SYT1, VCL, ARHGAP44, NTF3, AURKA, MAP4K4, BMPR1B, PAK3, DIP2B, PRKCZ, ALCAM, SEMA3C, TNFR, SDC2, USP33, PTPRO, PLXNA2, SEMA3E, ATL1, AFG3L2, ANK3, BCL11B, PDLIM5, NRK, SEMA3D, SLC23A2, B4GALT6, DRAXIN, FARP1, ALS2, DPYSL5, ZDHHC17, ABI1, ITGA4, CYFIP2, ADGRB1, WNT7A, LHX9, FEZ2, ITGA1, FLRT2, CCDC141                                                                                                                                                                                                                                                                                                                                                                                                                                                                                                                                                                                                                                                                                                                                                                                                                                                                                                                                                                                                                                                                                                                                                                                                                                                                                                                                                                                                                                                                                                                                                                                                                                                                                                                                                                                                                                                                                                                                                                                                                                           |
| GO:0048522 | positive regulation of cellular process | 0.0010387455555336998 | WWC1, MTOR, NSG1, PLCB1, ABCA13, KSR1, BRINP3, ZFPM2, TENM4, RIPOR2, RP1, KCNMA1, RIMS1, SPIRE1, TENM3, RARB, CDC42EP3, RIMS2, PJA2, BABAM2, ERBIN, CACNG2, NEGR1, MAP3K9, MYO3B, TCF4, NEK4, EGFR, ANGPT1, CDK12, MACF1, NEK7, ZNF407, NEDD4, MAML2, NSMCE2, SOX6, DKK2, THRAP3, MAPKBP1, DGKI, NEO1, CNTN6, SLC8A3, PAK1, EPHA7, NCOA7, SPEN, RAPGEF2, ADGRB3, RUNX2, ARSB, TAOK3, LDB2, RPTOR, ADAM10, IL1R1, APBB2, KDM1B, CACNB2, STAU2, SEMA5A, SYT1, NTF3, ACER2, AURKA, PYGO1, SLC8A1, SSBP2, SRGAP2C, ANKRD31, MAP4K4, BMPR1B, FMN2, RAB8B, PAK3, LARP1, ITPKB, SCP2, PRKCZ, GRB10, CNST, EBF2, YAP1, PDGFD, UBE2O, GFRA1, NIPBL, CORO2B, CHD6, MYLK3, KANSL1, ATF6, TPM1, LRRC38, BIRC6, KLF15, PPARA, SNX30, SYNJ1, ADAMTS3, TRERF1, SEMA3C, DAPK1, MAGI1, GATAD2B, IL34, MELK, RANBP3L, USP8, PIAS1, BLK, TNFR, MRPS27, APBB1IP, EIPR1, SLFN11, GLIS1, MYO10, LATS2, ASPM, AP3B1, DENND2B, ATP11C, ZNF438, ABCB7, ZBTB16, MUSK, SETDB2, PRKCE, FOXK2, CD44, PRRC1, NSMAF, SPRED2, RPS6KA3, PTPN2, PLXNA2, MCF2L, ATXN3, RIC3, ARHGEF7, ALG10B, ATP8A1, AMBRA1, KDM7A, OPRM1, SEMA3E, RPRD1B, ABHD17C, TMOD2, MSH2, RELL1, EPN2, CLSPN, BICRAL, MNAT1, MDFIC, ANK3, HMGA2, BCL11B, DOCK5, PLCE1, FUT9, PRR5L, VAV1, HLAB, IQSEC1, CACNA1I, BLM, ADCY10, BMP2, RC3H2, GFI1B, BMP2K, SEMA3D, NFATC2, SLC23A2, MYOM1, TRAF3, TTC21B, UIMC1, ATF1, CGAS, CNKSR3, VENTX, PRDM10, MOB1B, BBS4, MAPK8IP1, CFTR, KITLG, GTF2I, TADA2A, ZNF208, NMD3, MTMR2, TBX20, PRKCH, IL6R, ALS2, TFDP1, TOX, USP7, PLAGL1, MESD, KIR2DL4, RALB, NPAS2, VCAM1, DTX1, SUPT16H, BAZ1A, NEK6, HECTD1, NMU, SNAI2, IGHV3-74, BID, RXRG, SP3, ERN2, MBTPS2, TRIM58, TIAL1, ELF2, ZDHHC17, FYCO1, SH3GLB1, KCNC1, CSF1, GHRH, BCL2L1, ASB4, SMAD5, TCERG1, SLC40A1, PRAME, LPGAT1, MED1, CDC14B, PRAMEF25, PTH, PRKAA2, CSF2RB, VSTM2A, PLA2G4A, ZBTB7C, TEAD1, ANP32B, YBX3, AIMP1, PCID2, CIBAR1, CADM1, NET1, ANLN, MADD, HCRTR1, PATL1, ZNF287, PRSS2, CREBBP, MELTF, GORAB, NFKBIA, ABCC8, RFC2, ALX4, RTRAF, NEDD9, OLFM4, ASS1, SAR1A, ZBTB49, EXOC1, KRT6A, STOX2, AGO1, GID8, ELL2, NDFIP2, NR2C1, MTPN, ABI1, ITGA4, OAZ2, POU1F1, UBE2J2, TM9SF4, CEP120, CYFIP2, ARID3B, RXRA, ADGRB1, WNT7A, NDFIP1, MAP3K4, ZNF112, ATP6V1C2, MAGEL2, SDCBP, NSMCE1, NCK1, SCAF8, FGR, IFNAR1, RNF8, DNMT3L, OCLN, CD101, CD5L, ANKRD6, SCGN, ASCL3, LAMB1, KIRREL1, GPR55, TNFSF11, PPM1F, SH2D3C, TET1, RAD9A, ITGA1, POR, ZNF850, PRDM15, MACROH2A1, TOGARAM1, CSNK1G1, FLRT2, BTBD10, NUDT21, RFX2 |
| GO:0051234 | establishment of localization           | 0.0011616755523986984 | WWC1, MICU2, NSG1, LRP12, SLC25A21, TMPRSS2, ABCA13, CACNA2D3, KCNH5, SLC37A1, PIEZO2, RIPOR2, ERC1, SLC44A5, KCNMA1, COG5, RIMS1, PIK3C3, SPIRE1, EXOC6B, SPAG16, TRAPP C8, USH2A, RIMS2, SV2C, ERBIN, FCHO2, CACNG2, MYO5C, OCA2, EGFR, DENND1A, ANGPT1, MACF1, DOCK2, NEDD4, BTBD9, TUSC3, DNAJC13, GABRB1, DGKI, C12ORF4, GRIA1, SLC39A12, SLC8A3, TOM1L2, PAK1, GRAMD1B, ARSB, GABRA6, LDLRAD3, AGK, RANBP17, SLC44A1, KIF4A, ADAM10, SLC7A2, CACNB2, STAU2, TM C1, SYT1, ARHGAP44, NTF3, SLC8A1, FMN2, HOMER2, RAB8B, RF                                                                                                                                                                                                                                                                                                                                                                                                                                                                                                                                                                                                                                                                                                                                                                                                                                                                                                                                                                                                                                                                                                                                                                                                                                                                                                                                                                                                                                                                                                                                                                                                                                                                                                                                                                                                                                                                                                                                                        |



|            |                            |                       |                                                                                                                                                                                                                                                                                                                                                                                                                                                                                                                                                                                                                                                                                                                                                                                                                                                                                                                                                                                                                                                                                                                                                                                                                                                                                                                                                                                                                                                                                                                                                                                                                                                                                                                                                                                              |
|------------|----------------------------|-----------------------|----------------------------------------------------------------------------------------------------------------------------------------------------------------------------------------------------------------------------------------------------------------------------------------------------------------------------------------------------------------------------------------------------------------------------------------------------------------------------------------------------------------------------------------------------------------------------------------------------------------------------------------------------------------------------------------------------------------------------------------------------------------------------------------------------------------------------------------------------------------------------------------------------------------------------------------------------------------------------------------------------------------------------------------------------------------------------------------------------------------------------------------------------------------------------------------------------------------------------------------------------------------------------------------------------------------------------------------------------------------------------------------------------------------------------------------------------------------------------------------------------------------------------------------------------------------------------------------------------------------------------------------------------------------------------------------------------------------------------------------------------------------------------------------------|
|            |                            |                       | <p>TN1, RAP1GDS1, CLIC6, CUBN, SCP2, IFT57, PRKCZ, GRB10, MCPH1, CNST, ABCA5, VPS35L, ABCD3, RABGAP1L, SGTB, TRPC7, SLC45A4, UBE2O, NIPBL, NIPAL2, IPO11, MICU1, CORO2B, TLK1, LRRC38, ZDHHC14, CORIN, KLF15, PPARA, SNX30, KCNS3, SYNJ1, RSRC1, DAPK1, SLC24A4, SEC14L1, VPS13C, DNAH11, SCN2A, RAB22A, DNAJC15, AMPH, CPE, BBS2, SLC9C1, RANBP3L, NKG7, SLC36A1, BLK, KCNH1, EIPR1, DNAH5, MYO10, PLEKHA8, GSG1L, AP3B1, ATP11C, ABCB7, PRKCE, SLMAP, USP33, ABCC9, STXBP6, PEX14, SLC2A3, ARHGEF7, ALG10B, ATP8A1, RFTN2, OPRM1, BIN2, CYBRD1, CNNM4, EPN2, ABCA10, CD163, AFG3L2, MDFIC, ANK3, NIPA2, COG2, VPS41, LYPLA1, PRR5L, VPS37A, VAV1, CACNA1I, BHLHE40-AS1, SLC10A7, ADCY10, STX12, BMP2, ATP9A, TRAK1, RIN3, BMP2K, SLC15A5, NETO2, AP4E1, SLC23A2, MYOM1, PRG4, TTC21B, SNX8, CCDC186, KCNH8, SLC37A2, GABRR2, CNKSR3, DAW1, BBS4, LRRC8B, MAPK8IP1, CFTR, TBC1D13, NMD3, REPS1, MTMR2, HEPHL1, TRPM6, SLC12A1, TG, ALS2, SNX25, OSCP1, SCN10A, USP7, MON2, MESD, RALB, YIPF6, SEL1L, SLC13A5, NPIPA1, CUL5, IGHV3-74, BID, OSBPL10, COX5A, TRIM58, ZDHHC17, FYCO1, SH3GLB1, SLC22A14, XKR5, IFT81, ENPP1, KCNC1, GHRH, BCL2L1, SYNJ2, SLC40A1, CABYR, CIDEA, MED1, IPCEF1, ATG4B, PTH, PLA2G4A, SLC25A52, KIFC1, CAMLG, COX7A2L, ANP32B, AIMP1, LASP1, PCID2, PEG10, SLC1A7, MELTF, ARL11, SIAH3, TRPV5, NFKBIA, ABCC8, RTRAF, SLC14A2, SAR1A, TRAPPC3, OTOP1, EXOC1, FAM189A2, NDFIP2, SLC6A11, ITGA4, OAZ2, BCAP29, UBE2J2, TM9SF4, CEP120, STOML1, RXRA, ADGRB1, WNT7A, NDFIP1, ATP6V1C2, MAGEL2, SDCBP, JPT2, FLVCR1, FGR, SNAP29, C2, RN7S1, L767P, PLEKHA3, OCLN, STON1-GTF2A1L, MFSD9, MVB12B, CD5L, SCARA5, HEATR5A, PLCZ1, SLC9A5, NSUN2, ANO10, TNFSF11, PPM1F, XPO7, TMEM63C, SLC16A9, IFT46, SLC14A1, NSG2, MACROH2A1, CSNK1G1, ATP6V0D2, ATG5, NUP43, DDX6</p> |
| GO:0048666 | neuron development         | 0.0012160107975043915 | <p>LRP12, SPOCK1, CNTN4, TENM4, RIPOR2, RP1, RIMS1, TENM3, MINAR1, RIMS2, NEGR1, DOCK10, MACF1, NEDD4, CRB1, PHACTR1, GABRB1, NEO1, CNTN6, SLC39A12, PAK1, EPHA7, RAPGEF2, ADGRB3, ARSB, TAOK3, EPB41L3, STAU2, TMC1, SEMA5A, SYT1, VCL, ARHGAP44, NTF3, AURKA, SRGAP2C, MAP4K4, BMPR1B, PAK3, DIP2B, PRKCZ, KLHL1, ALCAM, GFRA1, SEMA3C, BLK, TNF, SDC2, USP33, PTPRO, PLXNA2, SEMA3E, ATL1, AFG3L2, ANK3, BCL11B, FUT9, MYT1L, IQSEC1, PDLIM5, NRK, SEMA3D, SLC23A2, B4GALT6, TSPAN2, DRAXIN, ATF1, FARP1, BBS4, MTMR2, ALS2, TOX, DPYSL5, ZDHHC17, VSX1, ABI1, ITGA4, CYFIP2, ADGRB1, WNT7A, FOXO6, NCK1, LHX9, FEZ2, LAMB1, RP1L1, ITGA1, UNK, FLRT2, CCDC141</p>                                                                                                                                                                                                                                                                                                                                                                                                                                                                                                                                                                                                                                                                                                                                                                                                                                                                                                                                                                                                                                                                                                                        |
| GO:0043412 | macromolecule modification | 0.0012580846054179367 | <p>MTOR, TMTC1, KSR1, ERC1, F13A1, PIK3C3, MINAR1, PJA2, BAM2, MAP3K9, MYO3B, NEK4, EGFR, USP14, ANGPT1, CDK12, PRKACB, NEK7, NEDD4, NSMCE2, B3GALT5, TUSC3, SLC8A3, PAK1, EPHA7, NCOA7, RAPGEF2, TAOK3, RPTOR, ADAM10, KDM1B, KLHL13, USP18, NTF3, ACER2, PARP15, AURKA, SLC8A1, DTWD2, MAP4K4, BMPR1B, PAK3, TTLL7, DIP2B, ITPKB, HHAT, PRKCZ, SPOP, MAN2A2, ST8SIA5, SENP6, GALNT14, PPM1L, RIPK4, USP25, PDGFD, ZNRF3, XXYLT1, UBE2O, GFRA1, NIPBL, STK38, MYLK3, KANS1L, CCNG2, TLK1, ZDHHC14, BIRC6, KLF15, PPP6R3, RSRC1, PTPRK, TRERF1, PDZRN3, DAPK1, STK32B, ALPK2, GATAD2B, CPE, IL34, MELK, USP8, PIAS1, UBE2R2, BLK, OXR1, TTLL5, EIPR1, ATE1, MORC1, LATS2, AP3B1, ZBTB16, MUSK, SMARCA1, SETDB2, PRKCE, USP33, CD44, PTPRO, ALPK3, PRRC1, LNPEP, SPRED2, RPS6KA3, PTPN2, ATXN3, ST8SIA6, ALG10B, AMBRA1, GALNT10, KDM7A, FANCM, FANCA, RPRD1B, ABHD17C, HIPK3, CLSPN, MNAT1, HMGA2, FOLH1, STK32A, LYPLA1, CWC27, PLCE1, FUT9, PRR5L, GXYLT2, FBXO32, BLM, NRK, BMP2, RC3H2, TRAK1, BMP2K, RNF38, SH3BP5, TRAF3, UIMC1, B4GALT6, CNKSR3, CUL1, DAW1, MOB1B, MAPK8IP1, KITLG, TADA2A, UBE2E1, PTPRE, MTMR2, WSB1, TRPM6, PRKCH, IL6R, ALS2, SNX25, TOX, PTPRB, USP7, MOK, RALB, DTX1, FANCL, CUL5, NEK6, HECTD1, SNAI2, SIAH2,</p>                                                                                                                                                                                                                                                                                                                                                                                                                                                                                                                                             |

|            |                                   |                       |                                                                                                                                                                                                                                                                                                                                                                                                                                                                                                                                                                                                                                                                                                                                                                                                                                                                                                                                                                                                                                                                                                                                                                                                                                                     |
|------------|-----------------------------------|-----------------------|-----------------------------------------------------------------------------------------------------------------------------------------------------------------------------------------------------------------------------------------------------------------------------------------------------------------------------------------------------------------------------------------------------------------------------------------------------------------------------------------------------------------------------------------------------------------------------------------------------------------------------------------------------------------------------------------------------------------------------------------------------------------------------------------------------------------------------------------------------------------------------------------------------------------------------------------------------------------------------------------------------------------------------------------------------------------------------------------------------------------------------------------------------------------------------------------------------------------------------------------------------|
|            |                                   |                       | <p>PGAP4,ERN2,TRIM58,ZDHHHC17,PTAR1,ENPP1,CSF1,PPIL6,EOGT,CTDP1,ASB4,SMAD5,PRAME,KLHL7,ATG4B,CDC14B,PRKAA2,CSF2RB,RNF182,PHF20L1,CAMLG,FICD,CADM1,ELOC,MADD,CREBBP,MRM1,SIAH3,RTRAF,NEDD9,PCMTD2,PDP2,NDP2,FIP2,MARCHF6,ABI1,PPME1,UBE2J2,ASB2,ASCC2,ST8SIA4,ADGRB1,NDP1F1,MAP3K4,TRIM43B,TRIM43,MAGEL2,SDCBP,NSMCE1,MLLT1,NCK1,FGR,RNF8,DNMT3L,OCN,KIRREL1,NUN2,TNFSF11,DPY19L1,PPM1F,SH2D3C,ZFYVE28,STT3A,TE1,ASB3,SPOPL,ITGA1,POR,SENP8,USP49,MACROH2A1,CSNK1G1,CAMK1G,ATG5,TLL11</p>                                                                                                                                                                                                                                                                                                                                                                                                                                                                                                                                                                                                                                                                                                                                                            |
| GO:0031175 | neuron projection development     | 0.001751893965180288  | <p>LRP12,SPOCK1,CNTN4,RIPOR2,RIMS1,TENM3,MINAR1,RIMS2,NEGR1,DOCK10,MACF1,NEDD4,PHACTR1,NEO1,CNTN6,SLC39A12,PAK1,EPHA7,RAPGEF2,ADGRB3,ARSB,TAOK3,EPB41L3,STAU2,SEMA5A,SYT1,VCL,ARHGAP44,NTF3,AURKA,SRGAP2C,MAP4K4,BMPR1B,PAK3,DIP2B,PRKCZ,KLHL1,ALCAM,GFRAL1,SEMA3C,BLK,TNR,SDC2,USP33,PTPRO,PLXNA2,SEMA3E,ATL1,AFG3L2,ANK3,BCL11B,FUT9,IQSEC1,PDLIM5,NRK,SEMA3D,SLC23A2,B4GALT6,TSPAN2,DRAXIN,ATF1,FARP1,BBS4,ALS2,TOX,DPYSL5,ZDHHHC17,ABI1,ITGA4,CYFIP2,ADGRB1,WNT7A,FOXO6,NCK1,LHX9,FEZ2,LAMB1,ITGA1,FLRT2,CCDC141</p>                                                                                                                                                                                                                                                                                                                                                                                                                                                                                                                                                                                                                                                                                                                            |
| GO:0009966 | regulation of signal transduction | 0.0020847681704016865 | <p>WWC1,GARNL3,MTOR,PLCB1,ZNF536,KSR1,RIPOR2,FBN1,RIMS1,MINAR1,RIMS2,PJA2,BABAM2,ERBIN,CACNG2,EGFR,DENND1A,ANGPT1,MACF1,PRKACB,NCOR1,DOCK2,NEDD4,DKK2,MAPKBP1,DGKI,NEO1,CNTN6,SLC8A3,PAK1,EPHA7,RALGPS1,RAPGEF2,RUNX2,TAOK3,RPTOR,ADAM10,IL1R1,USP18,SEMA5A,ARHGAP44,NTF3,AURKA,MAP4K4,BMPR1B,HOMER2,PAK3,ITPKB,RGS20,PDE10A,RAP1GDS1,KICS2,PRKCZ,GRB10,RGS9,YAP1,PDGFD,ZNRF3,UBE20,STK38,HRH4,ATF6,BIRC6,KLF15,PPARA,ADAMTS3,ARHGEF12,DAPK1,SLC24A4,SEC14L1,ALPK2,IL34,USP8,BLK,GAS2,LATS2,GSG1L,ASPM,DENND2B,GNG7,PRKCE,USP33,CD44,RGS12,PTPRO,LIMD1,SPRED2,PTPN2,MCF2L,OPRM1,FANCA,SEMA3E,TMOD2,RELL1,HIPK3,EPN2,MOSMO,MDFIC,PLCE1,CRIM1,PRR5L,VAV1,IQSEC1,NRK,MAGI3,BMP2,RC3H2,BMP2K,NETO2,TRAF3,TTC21B,RAP1GAP,DRAXIN,CNKSR3,MAPK8IP1,UBASH3A,KITLG,PTPRE,MTMR2,TBX20,AFAP1,PRKCH,IL6R,ALS2,SNX25,USP7,RALB,ARHGAP31,DTX1,NEK6,SNAI2,BID,SIAH2,ERN2,TIAL1,ZDHHHC17,SAMHD1,IFT81,ENPP1,CSF1,GHRH,BCL2L1,DHRS3,PRAME,MED1,PTH,PRKAA2,YBX3,PCID2,CIBAR1,PBLD,FICD,CADM1,PEG10,NET1,FSTL1,MADD,HCRTR1,CREBBP,GORAB,NFKBIA,OTOP1,GID8,FAM189A2,NDP1F2,NR2C1,CYFIP2,RXRA,WNT7A,NDP1F1,MAP3K4,ATP6V1C2,C16ORF72,PDE2A,SDCBP,JPT2,NCK1,FGR,CYTH4,POSTN,MVB12B,ANKRD6,LAMB1,GPR55,TNFSF11,ZFYVE28,TET1,RAD9A,ITGA1,POR,PRDM15,SRGAP3,CSNK1G1,TMEM25</p> |
| GO:0010646 | regulation of cell communication  | 0.002249682218135826  | <p>WWC1,GARNL3,MTOR,NSG1,PLCB1,ZNF536,KSR1,CNTN4,RIPOR2,ERC1,FBN1,RIMS1,MINAR1,RIMS2,PJA2,BABAM2,ERBIN,CACNG2,EGFR,DENND1A,ANGPT1,MACF1,PRKACB,NCOR1,DOCK2,NEDD4,BTBD9,DKK2,MAPKBP1,DGKI,GRIA1,NEO1,CNTN6,SLC8A3,PAK1,EPHA7,RALGPS1,RAPGEF2,RUNX2,TAOK3,RPTOR,ADAM10,IL1R1,CACNB2,STAU2,USP18,SEMA5A,SYT1,ARHGAP44,NTF3,AURKA,SLC8A1,MAP4K4,BMPR1B,HOMER2,RAB8B,PAK3,ITPKB,RGS20,PDE10A,RAP1GDS1,KICS2,PRKCZ,GRB10,RGS9,YAP1,PDGFD,ZNRF3,UBE20,STK38,HRH4,SOCS3,ATF6,BIRC6,KLF15,PPARA,ADAMTS3,ARHGEF12,DAPK1,SLC24A4,SEC14L1,ALPK2,IL34,USP8,BLK,TNR,GAS2,EIPR1,LATS2,GSG1L,ASPM,DENND2B,GNG7,PRKCE,USP33,CD44,RGS12,PTPRO,LIMD1,SPRED2,PTPN2,MCF2L,ARHGEF7,OPRM1,FANCA,SEMA3E,TMOD2,RELL1,HIPK3,EPN2,MOSMO,MDFIC,ANK3,PLCE1,CRIM1,PRR5L,VAV1,IQSEC1,NRK,MAGI3,BMP2,RC3H2,BMP2K,NETO2,TRAF3,TTC21B,RAP1GAP,DRAXIN,CNKSR3,MAPK8IP1,CFTR,UBASH3A,KITLG,PTPRE,MTMR2,TBX20,AFAP1,PRKCH,IL6R,ALS2,SNX25,USP7,RALB,ARHGAP31,DTX1,NEK6,NMU,SNAT2,BID,SIAH2,ERN2,TIAL1,ZDHHHC17,SAMHD1,IFT81,ENPP1,CSF1,GHRH,BCL2L1,DHRS3,PRAM</p>                                                                                                                                                                                                                         |

|            |                                           |                      |                                                                                                                                                                                                                                                                                                                                                                                                                                                                                                                                                                                                                                                                                                                                                                                                                                                                                                                                                                                                                                                                                                                                                                                                                                                                                                                                                                                                                                                                                                                                                                                                                                                                                                                                                                                                                                                    |
|------------|-------------------------------------------|----------------------|----------------------------------------------------------------------------------------------------------------------------------------------------------------------------------------------------------------------------------------------------------------------------------------------------------------------------------------------------------------------------------------------------------------------------------------------------------------------------------------------------------------------------------------------------------------------------------------------------------------------------------------------------------------------------------------------------------------------------------------------------------------------------------------------------------------------------------------------------------------------------------------------------------------------------------------------------------------------------------------------------------------------------------------------------------------------------------------------------------------------------------------------------------------------------------------------------------------------------------------------------------------------------------------------------------------------------------------------------------------------------------------------------------------------------------------------------------------------------------------------------------------------------------------------------------------------------------------------------------------------------------------------------------------------------------------------------------------------------------------------------------------------------------------------------------------------------------------------------|
|            |                                           |                      | E, MED1, PTH, PRKAA2, YBX3, AIMP1, PCID2, CIBAR1, PBLD, FICD, CADM1, PEG10, NET1, FSTL1, MADD, HCRTR1, CREBBP, GORAB, NFKBIA, ABCC8, OTOF1, GID8, FAM189A2, NDFIP2, NR2C1, CYFIP2, RXRA, ADGRB1, WNT7A, NDFIP1, MAP3K4, ATP6V1C2, C16ORF72, PDE2A, SDCBP, JPT2, NCK1, FGR, CYTH4, POSTN, MVB12B, ANKRD6, SCGN, LAMB1, GPR55, TNFSF11, ZFYVE28, TET1, RAD9A, ITGA1, POR, PRDM15, SRGAP3, CSNK1G1, TMEM25                                                                                                                                                                                                                                                                                                                                                                                                                                                                                                                                                                                                                                                                                                                                                                                                                                                                                                                                                                                                                                                                                                                                                                                                                                                                                                                                                                                                                                            |
| GO:0023051 | regulation of signaling                   | 0.004064219736681283 | WWC1, GARNL3, MTOR, NSG1, PLCB1, ZNF536, KSR1, CNTN4, RPIOR2, ERC1, FBN1, RIMS1, MINAR1, RIMS2, PJA2, BABAM2, ERBIN, CACNG2, EGFR, DENND1A, ANGPT1, MACF1, PRKACB, NCOR1, DOCK2, NEDD4, BTBD9, DKK2, MAPKBP1, DGKI, GRIA1, NEO1, CNTN6, SLC8A3, PAK1, EPHA7, RALGPS1, RAPGEF2, RUNX2, TAOK3, RPTOR, ADAM10, IL1R1, CACNB2, STAU2, USP18, SEMA5A, SYT1, ARHGAP44, NTF3, AURKA, MAP4K4, BMPR1B, HOMER2, RAB8B, PAK3, ITPKB, RGS20, PDE10A, RAP1GDS1, KICS2, PRKCZ, GRB10, RGS9, YAP1, PDGFD, ZNRF3, UBE2O, STK38, HHRF4, SORCS3, ATF6, BIRC6, KLF15, PPARA, ADAMTS3, ARHGEF12, DAPK1, SLC24A4, SEC14L1, ALPK2, IL34, USP8, BLK, TNF, GAS2, EIPR1, LATS2, GSG1L, ASPM, DENND2B, GNG7, PRKCE, USP33, CD44, RGS12, PTPRO, LIMD1, SPRED2, PTPN2, MCF2L, ARHGEF7, OPRM1, FANCA, SEMA3E, TMOD2, RELL1, HIPK3, EPN2, MOSMO, MDFIC, PLCE1, CRIM1, PRR5L, VAV1, IQSEC1, NRK, MAGI3, BMP2, RC3H2, BMP2K, NETO2, TRAF3, TTC21B, RAP1GAP, DRAXIN, CNKSR3, MAPK8IP1, CFTR, UBASH3A, KITLG, PTPRE, MTMR2, TBX20, AFAP1, PRKCH, IL6R, ALS2, SNX25, USP7, RALB, ARHGAP31, DTX1, NEK6, NMU, SNAI2, BID, SIAH2, ERN2, TIAL1, ZDHHC17, SAMHD1, IFT81, ENPP1, CSF1, GHRH, BCL2L1, DHRS3, PRAME, MED1, PTH, PRKAA2, YBX3, AIMP1, PCID2, CIBAR1, PBLD, FICD, CADM1, PEG10, NET1, FSTL1, MADD, HCRTR1, CREBBP, GORAB, NFKBIA, ABC8, OTOF1, GID8, FAM189A2, NDFIP2, NR2C1, CYFIP2, RXRA, ADGRB1, WNT7A, NDFIP1, MAP3K4, ATP6V1C2, C16ORF72, PDE2A, SDCBP, JPT2, NCK1, FGR, CYTH4, POSTN, MVB12B, ANKRD6, SCGN, LAMB1, GPR55, TNFSF11, ZFYVE28, TET1, RAD9A, ITGA1, POR, PRDM15, SRGAP3, CSNK1G1, TMEM25                                                                                                                                                                                                                                                                      |
| GO:0048518 | positive regulation of biological process | 0.004847366922259332 | WWC1, MTOR, NSG1, TMPRSS2, PLCB1, ABCA13, KSR1, BRINP3, ZFPM2, TENM4, RIPOR2, RPI1, KCNMA1, RIMS1, SPIRE1, TENM3, RARB, CDC42EP3, RIMS2, PJA2, BABAM2, ERBIN, CACNG2, NEGR1, SUSD4, MAP3K9, MYO3B, TCF4, NEK4, EGFR, ANGPT1, CDK12, MACF1, NEK7, NCOR1, DOCK2, ZNF407, NEDD4, MAML2, NSMCE2, SOX6, DKK2, THRAP3, MAPKBP1, DGKI, C12ORF4, NEO1, CNTN6, SLC39A12, SLC8A3, PAK1, EPHA7, NCOA7, SPEN, RAPGEF2, ADGRB3, RUNX2, ARSB, TAOK3, LDB2, RPTOR, ADAM10, IL1R1, APBB2, KDM1B, CACNB2, STAU2, SEMA5A, SYT1, NTF3, ACER2, AURKA, PYGO1, SLC8A1, SSBP2, SRGAP2C, ANKRD31, MAP4K4, BMPR1B, FMN2, RAB8B, PAK3, RFTN1, DIP2B, LARP1, ITPKB, SCP2, IFT57, PRKCZ, GRB10, CNST, ABCA5, EBF2, YAP1, PLG, PDGFD, UBE2O, GFRA1, NIPBL, CORO2B, CHD6, MYLK3, KANSL1, ATF6, TPM1, LRRC38, BIRC6, KLF15, PPARA, SNX30, SYNJ1, ADAMTS3, TRERF1, SEMA3C, DAPK1, SLC24A4, SEC14L1, MAGI1, GATAD2B, IL34, MELK, BBS2, RANBP3L, NKG7, USP8, PIAS1, BLK, TNF, MRPS27, DROSHA, APBB1IP, EIPR1, SLFN11, GLIS1, MYO10, LATS2, ASPM, AP3B1, DENND2B, ATP11C, ZNF438, ABCB7, ZBTB16, MUSK, SETDB2, PRKCE, FOXK2, CD44, PRRC1, NSMAF, LIMD1, SPRED2, RPS6KA3, PTPN2, PLXNA2, MCF2L, ATXN3, RIC3, ARHGEF7, ALG10B, ATP8A1, AMBRA1, KDM7A, OPRM1, FANCM, SEMA3E, RPRD1B, ALPL, ABHD17C, TMOD2, MSH2, RELL1, EPN2, CLSPN, BICRAL, MNAT1, MDFIC, ANK3, HMGA2, BCL11B, DOCK5, PLCE1, IL17RA, FUT9, PRR5L, VAV1, HLA-B, IQSEC1, CACNA1I, BLM, ADCY10, BMP2, RC3H2, GFI1B, BMP2K, SEMA3D, POLR3A, NFATC2, SLC23A2, MYOM1, TRAF3, TTC21B, UIMC1, ATF1, CGAS, CNKSR3, VENTX, PRDM10, MOB1B, BBS4, MAPK8IP1, CFTR, UBASH3A, KITLG, GTF2I, TADA2A, ZNF208, NMD3, MTMR2, TBX20, PRKCH, IL6R, ALS2, TFDP1, TOX, USP7, ENP3, PLAGL1, MESD, KIR2DL4, RALB, NPAS2, VCAM1, DTX1, SUPT16H, BAZ1A, NEK6, HECTD1, NMU, SNAI2, IGHV3-74, BID, RXRG, SP3, ERN2, MBTPS2, TRIM58, TIAL1, ELF2, ZDH |

|            |                                                            |                      |                                                                                                                                                                                                                                                                                                                                                                                                                                                                                                                                                                                                                                                                                                                                                                                                                                                                                                                                                                                                                                                                                                                                                                                                                                                                                                                                                                                                                                                                        |
|------------|------------------------------------------------------------|----------------------|------------------------------------------------------------------------------------------------------------------------------------------------------------------------------------------------------------------------------------------------------------------------------------------------------------------------------------------------------------------------------------------------------------------------------------------------------------------------------------------------------------------------------------------------------------------------------------------------------------------------------------------------------------------------------------------------------------------------------------------------------------------------------------------------------------------------------------------------------------------------------------------------------------------------------------------------------------------------------------------------------------------------------------------------------------------------------------------------------------------------------------------------------------------------------------------------------------------------------------------------------------------------------------------------------------------------------------------------------------------------------------------------------------------------------------------------------------------------|
|            |                                                            |                      | HC17, FYCO1, SH3GLB1, KCNC1, CSF1, GHRH, BCL2L1, ASB4, SMAD5, TCERG1, SLC40A1, PRAME, LPGAT1, MED1, CDC14B, CFH, PRAMEF25, PTH, PRKAA2, CSF2RB, VSTM2A, PLA2G4A, ZBTB7C, TEAD1, ANP32B, YBX3, AIMP1, FYB2, PCID2, CIBAR1, CADM1, NET1, ANLN, MADD, HCRT1, PATL1, ZNF287, PRSS2, CREBBP, MELTF, GORAB, NFKBIA, ABCC8, RFC2, ALX4, RTRAF, NEDD9, OLFML4, ASS1, SAR1A, ZBTB49, EXOC1, KRT6A, STOX2, AGO1, GID8, EL2, NDFIP2, NR2C1, MTPN, ABI1, ITGA4, OAZ2, POU1F1, UBE2J2, TM9SF4, CEP120, CYFIP2, ARID3B, RXRA, ADGRB1, WNT7A, NDFIP1, MAP3K4, FOXO6, ZNF112, ATP6V1C2, MAGEL2, PDE2A, SDCBP, NSMCE1, NCK1, SCAF8, FGR, C2, IFNAR1, RNF8, DNMT3L, WNT2B, OCLN, CD101, CD5L, ANKRD6, SCGN, ASCL3, LAMB1, KIRREL1, GPR55, TNFSF11, PPM1F, SH2D3C, TET1, RAD9A, ITGA1, POR, ZNF850, PRDM15, MACROH2A1, TOGARAM1, CSNK1G1, ATG5, FLRT2, BTBD10, NUDT21, RFX2                                                                                                                                                                                                                                                                                                                                                                                                                                                                                                                                                                                                               |
| GO:0051172 | negative regulation of nitrogen compound metabolic process | 0.011993471850971275 | WWC1, PLCB1, SPOCK1, ZNF536, ZFPM2, RARB, MINAR1, CDYL2, RTN1, EGFR, USP14, ANGPT1, NCOR1, NEDD4, SOX6, THRAP3, CAST, SLC8A3, NCOA7, SPEN, RUNX2, CPEB4, LDB2, APBB2, KDM1B, NTF3, PARP15, SLC8A1, SERPINA6, FMN2, LARP1, PRKCZ, MCPH1, YAP1, USP25, UBE2O, NIPBL, CARD18, STK38, ZNF684, BIRC6, KLF15, PPARA, PTPRK, TRERF1, DAPK1, PHC3, JARID2, GATAD2B, ZNF846, PIAS1, MXI1, OXR1, CREG1, PSMF1, SLFN11, GLIS1, MORC1, LATS2, ZBTB16, SETDB2, PRKCE, FOXK2, CD44, PTPRO, LIMD1, PEX14, SPRED2, RPS6KA3, PTPN2, MSH2, ZNF397, HIPK3, MDFIC, HMGA2, CRIM1, PRR5L, MYT1L, BLM, BMP2, RC3H2, GFI1B, NFATC2, SH3BP5, ZNF875, UIMC1, LRRFIP1, CGAS, CNKSR3, BTAFL1, MAPK8IP1, MRPL13, ZNF608, TBX20, SNX25, PTPRB, USP7, PLAGL1, ZNF169, ZBTB33, SNAI2, SIAH2, SP3, ERN2, ELF2, ENPP1, SMAD5, TCERG1, PRAME, MED1, SCML2, PRAMEF25, PRKAA2, CAMLG, YBX3, PCID2, CADM1, PATL1, CREBBP, RTRAF, ZBTB21, ZBTB49, AGO1, NR2C1, POU1F1, RXRA, ADGRB1, NDFIP1, SERPINI2, MAGEL2, PDE2A, SDCBP, MLLT1, NCK1, SCAF8, RNF8, DNMT3L, LHX9, OCLN, ASCL3, KIRREL1, NSUN2, TNFSF11, ZNF705G, PPM1F, PSME3IP1, ZFYVE28, TET1, SPOPL, ZNF705D, POR, MACROH2A1, ZNF705B, SERPINB2, ATG5, UNK, DDX6, SERPINB11                                                                                                                                                                                                                                                                             |
| GO:0065009 | regulation of molecular function                           | 0.013837459422381874 | GARNL3, MTOR, PLCB1, SPOCK1, KSR1, RIPOR2, ERC1, RIMS1, ERBIN, CACNG2, DOCK10, EGFR, DENND1A, USP14, ANGPT1, CDK12, NEK7, DOCK2, NEDD4, PHACTR1, DKK2, DGKI, CAST, SLC8A3, TBC1D19, PAK1, EPHA7, RALGPS1, RAPGEF2, ADGRB3, TAOK3, LDB2, PPP2R2B, PUM3, RPTOR, PPP1R12B, PHACTR2, CACNB2, ARHGAP44, NTF3, ACER2, AURKA, SLC8A1, SERPINA6, MAP4K4, BMPR1B, RGS20, RAP1GDS1, IFT57, PRKCZ, MCPH1, RGS9, EBF2, RIPK4, RABGAP1L, PDGFD, UBE2O, CARD18, STK38, CCNG2, TPM1, LRRC38, BIRC6, PPARA, PPP6R3, ARAP2, ARHGEF12, DAPK1, SLC24A4, TBC1D9, IL34, RANBP3L, BLK, PSMF1, LATS2, GSG1L, AP3B1, DENND2B, MUSK, PRKCE, ASAP2, SLMAP, USP33, CD44, RGS12, PTPRO, PRR1, ABCC9, NSMAF, PEX14, SPRED2, RPS6KA3, PTPN2, PLXNA2, MCF2L, ARHGEF7, ALG10B, AMBRA1, OPRM1, FANCA, MSH2, HIPK3, CLSPN, MNAT1, ANK3, HMGA2, DOCK5, PLCE1, CRIM1, VAV1, IQSEC1, BLM, BMP2, RIN3, BMP2K, NETO2, SH3BP5, TRAF3, RAP1GAP, CNKSR3, BTAFL1, ZNF618, FARP1, MOB1B, BBS4, MAPK8IP1, CFTR, TBC1D13, KITLG, NMD3, SH3PXD2A, PRKCH, IL6R, ALS2, TFDPI, PTPRB, USP7, RALB, DENND2C, ARHGAP31, XRCC4, BID, SIAH2, ERN2, MBTPS2, ENPP1, TMEM225, KCNC1, CSF1, CDC14B, PTH, ZBTB7C, ANP32B, PCID2, FICD, NET1, MADD, NFKBIA, ABCC8, ZC3H15, RFC2, RTRAF, NEDD9, PPP1R17, PDP2, NDFIP2, MTPN, ABI1, ITGA4, OAZ2, PPME1, CYFIP2, RXRA, NDFIP1, MAP3K4, SERPINI2, MLLT1, NCK1, FGR, CYTH4, DNMT3L, GPR55, TNFSF11, PPM1F, SH2D3C, PSME3IP1, ZFYVE28, ITGA1, POR, SRGAP3, MACROH2A1, SERPINB2, SERPINB11 |
| GO:1901564 | organonitrogen compound metabolic                          | 0.01433407834789898  | MTOR, NSG1, SLC25A21, TMPRSS2, TMTC1, PLCB1, SPOCK1, KSR1, ERC1, NME7, SLC44A5, F13A1, PIK3C3, ENPEP, MINAR1, PJA2, BABAM2, GLYAT, MAP3K9, MYO3B, CPA6, RTN1, NEK4, EGFR, USP14, ANGPT1, CDK12, PRKACB, NEK7, NCOR1, NEDD4, NSMCE2, BTBD9, PSMB2, B3GALT5, TUSC3, CAST, SLC8A3, PAK1, EPHA7,                                                                                                                                                                                                                                                                                                                                                                                                                                                                                                                                                                                                                                                                                                                                                                                                                                                                                                                                                                                                                                                                                                                                                                           |

|            |                          |                      |                                                                                                                                                                                                                                                                                                                                                                                                                                                                                                                                                                                                                                                                                                                                                                                                                                                                                                                                                                                                                                                                                                                                                                                                                                                                                                                                                                                                                                                                                                                                                                                                                                                                                                                                                                                                                                                                                                                                                                                                                                                                                                                                      |
|------------|--------------------------|----------------------|--------------------------------------------------------------------------------------------------------------------------------------------------------------------------------------------------------------------------------------------------------------------------------------------------------------------------------------------------------------------------------------------------------------------------------------------------------------------------------------------------------------------------------------------------------------------------------------------------------------------------------------------------------------------------------------------------------------------------------------------------------------------------------------------------------------------------------------------------------------------------------------------------------------------------------------------------------------------------------------------------------------------------------------------------------------------------------------------------------------------------------------------------------------------------------------------------------------------------------------------------------------------------------------------------------------------------------------------------------------------------------------------------------------------------------------------------------------------------------------------------------------------------------------------------------------------------------------------------------------------------------------------------------------------------------------------------------------------------------------------------------------------------------------------------------------------------------------------------------------------------------------------------------------------------------------------------------------------------------------------------------------------------------------------------------------------------------------------------------------------------------------|
|            | process                  |                      | <p>NCOA7,CHSY3,RAPGEF2,CPS1,TAOK3,LDLRAD3,CPEB4,AGK,BCKDHB,SLC44A1,PUM3,LRGUK,RPTOR,ADAM32,ADAM10,ADK,KDM1B,KLHL13,USP18,NTF3,ACER2,PARP15,AURKA,SLC8A1,SERPINA6,UPP2,MAP4K4,BMPR1B,FMN2,PAK3,TTLL7,DIP2B,LARP1,ITPKB,PDE10A,RAP1GDS1,HHAT,CHST8,CUBN,IFT57,PRKCZ,SPOP,MAN2A2,ST8SIA5,SENP6,GALNT14,PPM1L,RIPK4,SGTB,USP25,PLG,PAPPA,PDGFD,ZNRF3,XXYLT1,UBE2O,GFRA1,NIPBL,CARD18,STK38,MYLK3,KANSL1,ATF6,CCNG2,TLK1,MRPS22,ZDHHC14,CORIN,BIRC6,KLF15,PPARA,H S3ST2,PPP6R3,ADAMTS3,RSRC1,PTPRK,TRERF1,PDZRN3,DA PK1,FAR2,STK32B,ALPK2,GATAD2B,CPE,IL34,MELK,ASAH2B,USP8,PIAS1,UBE2R2,BLK,OLA1,AGPS,OXR1,MRPS27,TTLL5,EIPR1,PSMF1,ATE1,GALC,LATS2,AP3B1,ABCB7,ZBTB16,MUSK,SMARCAD1,SETDB2,PRKCE,FOXK2,USP33,CD44,PTPRO,ALPK3,PRRC1,NSMAF,LNPEP,SPRED2,RPS6KA3,PTPN2,ATXN3,ST8SIA6,ALG10B,AMBRA1,GALNT10,KDM7A,FANCM,FANCA,RPRD1B,TMEM67,ALPL,ABHD17C,HIPK3,CPXLM2,CLSPN,AFG3L2,MNAT1,XYLT1,HMGA2,FOLH1,STK32A,LYPLA1,CWC27,PLCE1,IL17RA,CRIM1,FUT9,PRR5L,GXYLT2,VPS37A,FBXO32,BLM,NRK,SLC10A7,MAGI3,ADCY10,BMP2,RC3H2,TRAK1,WDR26,BMP2K,RNF38,SH3BP5,TRAF3,UIMC1,B4GALT6,CNKSR3,CASP5,CUL1,DAW1,MOB1B,MAPK8IP1,ME2,MRPL13,KITLG,TADA2A,UBE2E1,PTPRE,MTMR2,WSB1,TRPM6,PRKCH,TG,IL6R,ALS2,SNX25,PTPRB,TSPAN33,USP7,ENPP3,HAAO,FAH,MOK,RALB,VCAM1,SEL1L,GSTA3,DTX1,ADA2,FANCL,CUL5,NEK6,HECTD1,SNAI2,BID,SIAH2,OSBPL10,PGAP4,ERN2,MBTPS2,TRIM58,ZDHHC17,PTAR1,SAMHD1,ENPP1,MOCS2,PAMR1,UCK2,CSF1,PPIL6,EOGT,CTDP1,ASB4,SMAD5,PRAME,KLHL7,LPGAT1,MED1,ATG4B,CDC14B,CFH,NPL,HGD,PTH,PRKAA2,CSF2RB,GLYATL1,RNF182,PHF20L1,PLA2G4A,CAMLG,ANP32B,YBX3,AIMP1,PCID2,CYP4F22,FICD,CADM1,ELOC,ADAM28,BPNT1,MADD,PATL1,PRSS2,CREBBP,MELTF,SIAH3,NFKBIA,ZC3H15,RTRAF,NEDD9,NOXRED1,ASS1,CNDF2,ERLIN2,PCMTD2,ZBTB49,AGO1,PDP2,GID8,NDFIP2,MARCHF6,MTPN,ABI1,OA2Z,PPME1,UBE2J2,ASB2,DHTKD1,CYFIP2,ACACA,ASC2,ST8SIA4,ADGRB1,WNT7A,NDFIP1,MAP3K4,TRIM43B,SERPINI2,TRIM43,MAGEL2,PDE2A,SDCBP,NSMCE1,MLLT1,NCK1,FLVCR1,FGR,C2,RNF8,OCLN,MVB12B,CD5L,KIRREL1,TNFSF11,DPY19L1,PPM1F,SH2D3C,PSME3IP1,TRNAU1AP,ZFYVE28,STT3A,SLC16A9,TET1,ASB3,OVCH2,SPOPL,ITGA1,POR,SENPP8,USP49,MACROH2A1,CSNK1G1,PRSS51,CAMK1G,SERPINB2,ATG5,UNK,DDX6,TTLL11,SERPINB11</p> |
| GO:0048513 | animal organ development | 0.017811301284173853 | <p>MTOR,SMOC1,PLCB1,NEBL,SGCD,CNTN4,ZFPM2,TENM4,RIPO R2,RP1,ODAD2,FBN1,TENM3,RARB,ENPEP,USH2A,NEGR1,MYO3B,EGFR,ANGPT1,CRB1,SOX6,PHACTR1,EPAH7,RAPGEF2,RUNX2,CPS1,PRICKLE2,LDB2,ADAM10,STAU2,TMC1,SEMA5A,SYT1,AURKA,PYGO1,SLC8A1,SRGAP2C,BMPR1B,IFT57,KLHL1,MCPH1,ZSWIM6,EBF2,YAP1,CADM2,PLG,PDGFD,ZNRF3,AB LIM1,GFRA1,NIPBL,MYLK3,ATF6,TPM1,ANKRD11,BIRC6,KLF15,PPARA,SYNJ1,SEMA3C,SLC24A4,ALPK2,DNAH11,JARID2,CPE,BBS2,RANBP3L,LDB3,TNR,XIRP2,GAS2,TTLL5,DNAH5,LATS2,ASPM,AP3B1,ZBTB16,SETDB2,CD44,PTPRO,ALPK3,COL5A3,SPRED2,NHS,PLXNA2,KDM7A,FANCA,CNNM4,SEMA3E,ALPL,MSH2,LUC7L,MNAT1,XYLT1,HMGA2,BCL11B,AK8,PLCE1,PDLIM5,SLC10A7,BMP2,RC3H2,BMP2K,RNF38,SEMA3D,TDRD7,TTC21B,TSPAN2,RAP1GAP,DRAXIN,CASP5,CUL1,DAW1,BBS4,COL5A1,CFTR,AHDC1,KITLG,TBX20,PRKCH,TG,IL6R,TOX,PDE6A,SCN10A,VCAM1,LRIG1,HECTD1,SNAI2,RXRG,SP3,MBTPS2,FLNB,KRT6B,ENPP1,KCNC1,CSF1,GHRH,BCL2L1,KRT25,CTDP1,DHRS3,SMAD5,SYNJ2,SLC40A1,MED1,ATG4B,FAT1,PTH,TEAD1,ANP32B,YBX3,PCID2,CADM1,VSX1,GORAB,ALX4,ASS1,OTOP1,KRT6A,STOX2,SLC6A11,MTPN,ABI1,POU1F1,ASB2,CEP120,KRT85,RXRA,ADGRB1,WNT7A,MAP3K4,PDE2A,SDCBP,FLVCR1,FGR,SPRR2D,DNMT3L,LHX9,WNT2B,TNNI1,ANKRD6,LAMB1,NSUN2,TNFSF11,ARL13B,UGP2,RP1L1,POR,B9D1,MACROH2A1,ATG5,FLRT2,CCDC141</p>                                                                                                                                                                                                                                                                                                                                                                                                                                                                                                                                                                                                                                                                                                                                                                                                                                                                                                              |

|            |                                                  |                      |                                                                                                                                                                                                                                                                                                                                                                                                                                                                                                                                                                                                                                                                                                                                                                                                                                                                                                                                                                                                                                                                                                                                                                                                                                                                                                                                                                                                                                                                                                                            |
|------------|--------------------------------------------------|----------------------|----------------------------------------------------------------------------------------------------------------------------------------------------------------------------------------------------------------------------------------------------------------------------------------------------------------------------------------------------------------------------------------------------------------------------------------------------------------------------------------------------------------------------------------------------------------------------------------------------------------------------------------------------------------------------------------------------------------------------------------------------------------------------------------------------------------------------------------------------------------------------------------------------------------------------------------------------------------------------------------------------------------------------------------------------------------------------------------------------------------------------------------------------------------------------------------------------------------------------------------------------------------------------------------------------------------------------------------------------------------------------------------------------------------------------------------------------------------------------------------------------------------------------|
| GO:0014706 | striated muscle tissue development               | 0.019204680454221103 | MTOR,NEBL,SGCD,ZFPM2,TENM4,RARB,SOX6,SLC8A1,YAP1,MYLK3,TPM1,PPARA,SEMA3C,ALPK2,JARID2,XIRP2,ALPK3,LUC7L,PDLIM5,BMP2,TBX20,CTDP1,SMAD5,MED1,MTPN,ASB2,TNNI1,ATG5                                                                                                                                                                                                                                                                                                                                                                                                                                                                                                                                                                                                                                                                                                                                                                                                                                                                                                                                                                                                                                                                                                                                                                                                                                                                                                                                                            |
| GO:0120031 | plasma membrane bounded cell projection assembly | 0.019355257515482793 | LRRC49,MTOR,RIPOR2,RP1,ODAD2,SPAG16,CDC42EP3,PARVB,MYO3B,ARMC2,RAPGEF2,LRGUK,STAU2,VCL,ARHGAP44,SRGAP2C,IFT57,YAP1,ABLIM1,BBS2,DNAH5,MYO10,PTPRO,ARHGEF7,TMEM67,PLCE1,DNAL1,TTC21B,RAP1GAP,DNAH8,DAW1,BBS4,CFAP74,IFT81,FAM149B1,CDC14B,CIBAR1,ANLN,GORAB,CEP120,SDCBP,NCK1,SNAP29,OCLN,ARL13B,RP1L1,IFT46,B9D1,TOGARAM1,ATG5,RFX2                                                                                                                                                                                                                                                                                                                                                                                                                                                                                                                                                                                                                                                                                                                                                                                                                                                                                                                                                                                                                                                                                                                                                                                         |
| GO:0007166 | cell surface receptor signaling pathway          | 0.019679105423894862 | PLCB1,ANKS1B,FBN1,RIMS1,RIMS2,ADGRE1,PJA2,ERBIN,EGFR,ANGPT1,MACF1,PRKACB,NEDD4,MAML2,DKK2,GABRB1,DKKI,GRIA1,NEO1,CNTN6,SLC8A3,PAK1,EPHA7,SPEN,RAPGEF2,ADGRB3,RUNX2,GABRA6,CPEB4,PRICKLE2,COL4A2,ADAM10,IL1R1,USP18,SEMA5A,NTF3,PYGO1,BMPR1B,HOMER2,PAK3,RFTN1,ITPKB,HHAT,IFT57,PRKCZ,BTLA,GRB10,YAP1,PPM1L,PAPPA,PDGFD,ZNRF3,ITGBL1,UBE2O,GFRA1,BIRC6,KLF15,PPARA,ADAMTS3,PTPRK,SEMA3C,DAPK1,MAGI1,ALPK2,CPE,EVC2,IL34,BBS2,USP8,PIAS1,BLK,GAS2,LATS2,ASPM,MUSK,PRKCE,CD44,PTPRO,LNPEP,LIMD1,SPRED2,PTPN2,PLXNA2,ARHGEF7,OPRM1,FANCA,SEMA3E,EPN2,MOSMO,MDF1C,PLCE1,IL17RA,CRIM1,VAV1,BMP2,RC3H2,BMP2K,SEMA3D,NFATC2,ZNF106,TRAF3,TTC21B,DRAVIN,GABRR2,WDR12,BBS4,UBASH3A,KITLG,PTPRE,MTMR2,TBX20,PRKCH,IL6R,SNX25,MESD,RALB,SEL1L,DTX1,ZBTB33,CUL5,SNAI2,IGHV3-74,BID,SIAH2,ZDHHC17,SAMHD1,IFT81,ENPP1,CSF1,GHRH,BCL2L1,SMAD5,MED1,PRKAA2,CSF2RB,CAMLG,FYB2,CIBAR1,PBLD,CADM1,PEG10,SLC1A7,FSTL1,SVEP1,MADD,CREBBP,GORAB,NFKBIA,ZC3H15,NEDD9,ADGRE3,OTOP1,GID8,FAM189A2,ABI1,ITGA4,CYFIP2,ADGRB1,WNT7A,ATP6V1C2,SDCBP,NCK1,FGR,IFNAR1,WNT2B,POSTN,CD101,MVB12B,ANKRD6,LAMB1,FCRLA,TNFSF11,ARL13B,ZFYVE28,TET1,ITGA1,POB,B9D1,PRDM15,CSNK1G1,FLRT2,TMEM25                                                                                                                                                                                                                                                                                                                                                                   |
| GO:0019538 | protein metabolic process                        | 0.023475391224244715 | MTOR,NSG1,TMPRSS2,TMTC1,PLCB1,SPOCK1,KSR1,ERC1,F13A1,PIK3C3,ENPEP,MINAR1,PJA2,BABAM2,MAP3K9,MYO3B,CPA6,RTN1,NEK4,EGFR,USP14,ANGPT1,CDK12,PRKACB,NEK7,NEDD4,NSMCE2,PSMB2,B3GALT5,TUSC3,CAST,SLC8A3,PAK1,EPHA7,NCOA7,CHSY3,RAPGEF2,TAOK3,LDLRAD3,CPEB4,PUM3,RPTOR,ADAM32,ADAM10,KDM1B,KLHL13,USP18,NTF3,ACER2,PARP15,AURKA,SLC8A1,SERPINA6,MAP4K4,BMPR1B,FMN2,PAK3,TLL7,DIP2B,LARP1,ITPKB,RAP1GDS1,HHAT,CST8,IFT57,PRKCZ,SPOP,MAN2A2,ST8SIA5,SENP6,GALNT14,PPM1L,RIPK4,SGTB,USP25,PLG,PAPPA,PDGFD,ZNRF3,XXYLT1,UBE2O,GFRA1,NIPBL,CARD18,STK38,MYLK3,KANSL1,ATF6,CCNG2,TLK1,MRPS22,ZDHHC14,CORIN,BIRC6,KLF15,PPARA,HS3ST2,PPP6R3,ADAMTS3,RSRC1,PTPRK,TRERF1,PDZRN3,DAPK1,STK32B,ALPK2,GATAD2B,CPE,IL34,MELK,USP8,PIAS1,UBE2R2,BLK,OXR1,MRPS27,TLL5,EIPR1,PSMF1,ATE1,LATS2,AP3B1,ZBTB16,MUSK,SMARCA1,SETDB2,PRKE,USP33,CD44,PTPRO,ALPK3,PRRC1,LNPEP,SPRED2,RPS6KA3,PTPN2,ATXN3,ST8SIA6,ALG10B,AMBRA1,GALNT10,KDM7A,FANCM,FANCA,RPRD1B,TMEM67,ABHD17C,HIPK3,CPXM2,CLSPN,AFG3L2,MNAT1,XLYT1,HMGA2,FOLH1,STK32A,LYPLA1,CWC27,PLCE1,IL17RA,CRIM1,FUT9,PRR5L,GXYLT2,VPS37A,FBXO32,BLM,NRK,BMP2,RC3H2,TRAK1,WDR26,BMP2K,RNF38,SH3BP5,TRAF3,UIMC1,B4GALT6,CNKSR3,CASP5,CUL1,DAAW1,MOB1B,MAPK8IP1,MRPL13,KITLG,TADA2A,UBE2E1,PTPRE,MTMR2,WSB1,TRPM6,PRKCH,IL6R,ALS2,SNX25,PTPRB,TSPAN33,USP7,MOK,RALB,SEL1L,DTX1,FANCL,CUL5,NEK6,HECTD1,SNAI2,BID,SIAH2,PGAP4,ERN2,MBTPS2,TRIM58,ZDHHC17,PTAR1,ENPP1,MOCS2,PAMR1,CSF1,PPL16,EOGT,CTDP1,ASB4,SMAD5,PRAME,KLHL7,ATG4B,CDC14B,CFH,PRKAA2,CSF2RB,RNF182,PHF20L1,CAMLG,ANP32B,YBX3,AIMP1,PC |

|            |                                               |                      |                                                                                                                                                                                                                                                                                                                                                                                                                                                                                                                                                                                                                                                                                                                                                                                                                                                                                                                                                                                                                                                                                                                                                     |
|------------|-----------------------------------------------|----------------------|-----------------------------------------------------------------------------------------------------------------------------------------------------------------------------------------------------------------------------------------------------------------------------------------------------------------------------------------------------------------------------------------------------------------------------------------------------------------------------------------------------------------------------------------------------------------------------------------------------------------------------------------------------------------------------------------------------------------------------------------------------------------------------------------------------------------------------------------------------------------------------------------------------------------------------------------------------------------------------------------------------------------------------------------------------------------------------------------------------------------------------------------------------|
|            |                                               |                      | ID2, FICD, CADM1, ELOC, ADAM28, MADD, PATL1, PRSS2, CREBBP, MELTF, SIAH3, NFKB1A, ZC3H15, RTRAF, NEDD9, CNDP2, ERLIN2, PCMTD2, AGO1, PDP2, GID8, NDFIP2, MARCHF6, MTPN, ABI1, OAZ2, PPME1, UBE2J2, ASB2, CYFIP2, ACACA, ASCC2, ST8SIA4, ADGRB1, WNT7A, NDFIP1, MAP3K4, TRIM43B, SERPINI2, TRIM43, MAGEL2, SDCBP, NSMCE1, MLLT1, NCK1, FGR, C2, RNF8, OCLN, MVB12B, CD5L, KIRREL1, TNFSF11, DPY19L1, PPM1F, SH2D3C, PSME3IP1, TRNAU1AP, ZFYVE28, STT3A, TET1, ASB3, OVC H2, SPOPL, ITGA1, POR, SENP8, USP49, MACROH2A1, CSNK1G1, PRSS51, CAMK1G, SERPINB2, ATG5, UNK, DDX6, TTLL11, SERPINB11                                                                                                                                                                                                                                                                                                                                                                                                                                                                                                                                                        |
| GO:0030031 | cell projection assembly                      | 0.032557152992683684 | LRRC49, MTOR, RIPOR2, RP1, ODAD2, SPAG16, CDC42EP3, PARVB, MYO3B, ARMC2, RAPGEF2, LRGUK, STAU2, VCL, ARHGAP44, SRGAP2C, IFT57, YAP1, ABLIM1, BBS2, DNAH5, MYO10, PTPRO, ARHGEF7, TMEM67, PLCE1, DNAL1, TTC21B, RAP1GAP, DNAH8, DAW1, BBS4, CFAP74, IFT81, FAM149B1, CDC14B, CIBAR1, ANLN, GORAB, CEP120, SDCBP, NCK1, SNAP29, OCLN, ARL13B, RP1L1, IFT46, B9D1, TOGARAM1, ATG5, RFX2                                                                                                                                                                                                                                                                                                                                                                                                                                                                                                                                                                                                                                                                                                                                                                |
| GO:0007017 | microtubule-based process                     | 0.033988872164939885 | LRRC49, RIPOR2, RP1, ODAD2, SPIRE1, SPAG16, MACF1, NEK7, NCOR1, ARMC2, SLC39A12, PAK1, DEUP1, LRGUK, KIF4A, STAU2, AURKA, SRGAP2C, CCSER2, FMN2, TTLL7, IFT57, PRKCZ, MCPH1, SENP6, DNAH14, DNAH11, BBS2, SLC9C1, TTLL5, DNAH5, ASPM, AP3B1, USP33, PEX14, ATXN3, ARHGEF7, TMEM67, CFAP61, CACNA1I, ADCY10, TRAK1, DNAL1, TUBGCP3, TTC21B, DNAH8, KIF15, DAW1, GOLGA8B, BBS4, MAP7, CFAP74, KIF11, NEK6, TRIM58, FYCO1, SLC22A14, IFT81, KIF21B, CABYR, CDC14B, PRKAA2, KIFC1, TUBB6, SGO1, CEP120, INTS13, OCLN, DNAH10, RP1L1, IFT46, TOGARAM1, TTLL11                                                                                                                                                                                                                                                                                                                                                                                                                                                                                                                                                                                            |
| GO:0051128 | regulation of cellular component organization | 0.04313465406896168  | MTOR, PLCB1, SPOCK1, ABCA13, RIPOR2, RP1, CDH8, RIMS1, SPIRE1, TENM3, MINAR1, CDC42EP3, RIMS2, RHPN2, NEGR1, MYO3B, EGFR, ANGPT1, MACF1, NEK7, NEDD4, NSMCE2, BTBD9, SLC39A12, TOM1L2, PAK1, EPHA7, RAPGEF2, ADGRB3, ARSB, RPTOR, EPB41L3, ADAM10, STAU2, SEMA5A, SYT1, VCL, ARHGAP44, NTF3, AURKA, SRGAP2C, MAP4K4, RAB8B, PAK3, DIP2B, RAP1GDS1, PRKCZ, MCPH1, SENP6, YAP1, CORO2B, MYLK3, TLK1, TPM1, PPARA, SNX30, SYNJ1, SEMA3C, VPS13C, DNAJC15, TANC1, TNR, SDC2, MYO10, GSG1L, ABCB7, MUSK, SETDB2, PRKCE, CD44, PTPRO, STXBP6, RPS6KA3, PLXNA2, ARHGEF7, ATP8A1, AMBRA1, SEMA3E, TMEM67, ABHD17C, TMOD2, MNAT1, VPS41, PLCE1, CRIM1, FUT9, IQSEC1, PDLIM5, BMP2, RIN3, BMP2K, SEMA3D, NFATC2, SLC23A2, RAP1GAP, DRAXIN, ATF1, KIF15, FARP1, BBS4, COL5A1, YLPM1, MTMR2, TBX20, AFAP1, PRKCH, KANK4, TOX, USP7, RALB, DPYSL5, BAZ1A, NEK6, SNAI2, BID, TRIM58, FYCO1, SH3GLB1, ENPP1, BCL2L1, CTDP1, PRKAA2, TEAD1, PCID2, NET1, ANLN, PRSS2, MELTF, ABCC8, NEDD9, SAR1A, MTPN, CEP120, CYFIP2, ADGRB1, WNT7A, MAP3K4, MAGEL2, PDE2A, SDCBP, NSMCE1, NCK1, SCAF8, OCLN, FEZ2, LAMB1, KIRREL1, PPM1F, TET1, MACROH2A1, TOGARAM1, ATG5, FLRT2 |
| GO:0009987 | cellular process                              | 0.04393577722998982  | WWC1, GARNL3, MICU2, LRRC49, MTOR, SMOC1, EBNA1BP2, NSG1, LRP12, SNHG14, SLC25A21, TMTC1, PLCB1, NEBL, SPOCK1, ABCA13, ANKS1B, ZNF536, KSR1, BRINP3, SGCD, CACNA2D3, CNTN4, KCNH5, SLC37A1, ZFPM2, PIEZO2, TENM4, RIPOR2, RP1, ERC1, NME7, SLC44A5, ODAD2, KCNMA1, ARPP21, FBN1, COG5, CDH8, DCDC1, PUDP, RIMS1, PIK3C3, SPIRE1, TENM3, RARB, EXOC6B, NAV2, ENPEP, SPAG16, TRAPPC8, USH2A, MINAR1, CDC42EP3, RIMS2, ADGRE1, CDYL2, PJA2, FAM135B, BABAM2, SV2C, ERBIN, RHPN2, ASTN1, FCHO2, PARVB, CACNG2, NEGR1, GLYAT, MAP3K9, MYO3B, MYO5C, RTN1, TCF4, ZNF573, OCA2, NEK4, DOCK10, TSHZ2, EGFR, DENND1A, USP14, ANGPT1, CDK12, MACF1, PRKACB, NEK7, NCOR1, HMCN2, DOCK2, DIAPH3, ZNF407, UGT3A2, NEDD4, MAML2, CRB1, NSMCE2, BTBD9, SOX6, PSMB2, ARMC2, B3GALT5, TUSC3, PHACTR1, DKK2, DNAJC13, CNTN3, THRAP3, MAPKBP1, AOAH, NAT1, GABRB1, DGKI, C12ORF4, GRIA1, CAST, NEO1, CNTN6, SLC39A12, SLC8A3, TOM1L2, CEP128, NELL2, PAK1, EPHA7, CTNNA1, NCOA7, GRAMD1B, RALGPS1, SPEN, CHSY3, RAPGEF2, ADGRB3, DEUP1, RUNX2, ARSB, GABRA6, CPS1, TAOK3, CPEB4                                                                                        |

|  |  |  |                                                                                                                                                                                                                                                                                                                                                                                                                                                                                                                                                                                                                                                                                                                                                                                                                                                                                                                                                                                                                                                                                                                                                                                                                                                                                                                                                                                                                                                                                                                                                                                                                                                                                                                                                                                                                                                                                                                                                                                                                                                                                                                                                                                                                                                                                                                                                                                                                                                                                                                                                                                                                                                                                                                                                                                                                                                                                                                                                                                                                                                                                                                                                                                                                                                                                                                                                                                                                                                                                                                                                                      |
|--|--|--|----------------------------------------------------------------------------------------------------------------------------------------------------------------------------------------------------------------------------------------------------------------------------------------------------------------------------------------------------------------------------------------------------------------------------------------------------------------------------------------------------------------------------------------------------------------------------------------------------------------------------------------------------------------------------------------------------------------------------------------------------------------------------------------------------------------------------------------------------------------------------------------------------------------------------------------------------------------------------------------------------------------------------------------------------------------------------------------------------------------------------------------------------------------------------------------------------------------------------------------------------------------------------------------------------------------------------------------------------------------------------------------------------------------------------------------------------------------------------------------------------------------------------------------------------------------------------------------------------------------------------------------------------------------------------------------------------------------------------------------------------------------------------------------------------------------------------------------------------------------------------------------------------------------------------------------------------------------------------------------------------------------------------------------------------------------------------------------------------------------------------------------------------------------------------------------------------------------------------------------------------------------------------------------------------------------------------------------------------------------------------------------------------------------------------------------------------------------------------------------------------------------------------------------------------------------------------------------------------------------------------------------------------------------------------------------------------------------------------------------------------------------------------------------------------------------------------------------------------------------------------------------------------------------------------------------------------------------------------------------------------------------------------------------------------------------------------------------------------------------------------------------------------------------------------------------------------------------------------------------------------------------------------------------------------------------------------------------------------------------------------------------------------------------------------------------------------------------------------------------------------------------------------------------------------------------------|
|  |  |  | ,AGK,BCKDHB,PRICKLE2,RANBP17,SLC44A1,LDB2,PPP2R2B<br>,PUM3,PATJ,LRGUK,RPTOR,EPB41L3,KIF4A,COL4A2,ADAM3<br>2,PPP1R12B,ADAM10,IL1R1,APBB2,PHACTR2,SLC7A2,ADK,<br>KDM1B,CACNB2,KLHL13,MTUS1,STAU2,TMC1,USP18,SEMA5A<br>,SYT1,VCL,ARHGAP44,NTF3,ACER2,PARP15,AURKA,CFDP1,<br>PYGO1,SLC8A1,SSBP2,SRGAP2C,DTWD2,ANKRD31,TAF2,UP<br>P2,CCSER2,SRGAP2B,MAP4K4,BMPR1B,FMN2,HOMER2,HADHB<br>,RAB8B,PAK3,RFTN1,PDE1A,ZNF257,TTL7,DIP2B,LARP1,<br>ITPKB,RGS20,PDE10A,RAP1GDS1,HHAT,CLIC6,CHST8,KICS<br>2,CUBN,SCP2,IFT57,INTS7,SUSD6,PRKCZ,KLHL1,SPOP,BT<br>LA,MAN2A2,GRB10,MCPH1,ZSWIM6,FER1L6,ST8SIA5,CNST,<br>RGS9,DEFA3,MBNL2,ABCA5,SENP6,GALNT14,LMNTD1,PDXDC<br>1,EBF2,YAP1,PPM1L,RIPK4,VPS35L,CADM2,ABCD3,RABGAP<br>1L,SGTB,DNAH14,TRPC7,USP25,ALCAM,PLG,PAPPA,PDGFD,<br>ZNR3F3,DNAJC21,CA5A,XXYL1,ABLIM1,ITGBL1,UBE2O,GFR<br>A1,SYCP1,NIPBL,RNF17,NIPAL2,PI4K2B,IPO11,EWSR1,MI<br>CU1,CORO2B,CARD18,CHD6,STK38,HRH4,SORCS3,MYLK3,KA<br>NSL1,MBNL1,ATF6,ZNF684,CCNG2,TLK1,TPM1,LRR38,MRP<br>S22,ZDHC14,BIRC6,KLF15,PPARA,HS3ST2,SNX30,KCNS3,<br>PPP6R3,SYNJ1,ADAMTS3,ARAP2,RSRC1,PTPRK,ARHGEF12,T<br>RERF1,SF3B6,PDZRN3,SEMA3C,DAPK1,SLC24A4,SEC14L1,F<br>AR2,VPS13C,STK32B,PHC3,MAGI1,ALPK2,DNAH11,JARID2,<br>SCN2A,RAB22A,DNAJC15,AMPH,GATAD2B,CPE,PALS2,EVC2,<br>IL34,TANC1,ZNF846,MELK,BBS2,SLC9C1,RANBP3L,OR4F6,<br>NKG7,ASAH2B,USP8,LDB3,SLC36A1,PIAS1,UBE2R2,BLK,EB<br>F1,TNR,OLA1,XIRP2,AGPS,MXI1,OXR1,SDC2,GAS2,KCNH1,<br>MRPS27,FHIP1A,CREG1,DROSHA,TLL5,APBB1IP,EIPR1,DN<br>AH5,PSMF1,ATE1,SLFN11,GLIS1,ACSS3,MORC1,LYRM4,MYO<br>10,PLEKHA8,GALC,LATS2,GSG1L,ASPM,AP3B1,DENND2B,CO<br>L6A5,ATP11C,ZNF438,ABCB7,ZBTB16,MUSK,KIR3DL2,GNG7<br>,SMARCA1,SETDB2,PRKCE,FOXK2,SLMAP,ZNF718,USP33,C<br>D44,RGS12,PTPRO,ALPK3,PRRC1,ABCC9,STXBP6,COL5A3,N<br>SMAF,LNPEP,LIMD1,PEX14,SPRED2,RPS6KA3,NHS,PTPN2,P<br>LXNA2,POC5,MCF2L,OR4F15,ATXN3,ST8SIA6,RIC3,SLC2A3<br>,ARHGEF7,ALG10B,ATP8A1,AMBRA1,GALNT10,KDM7A,OPRM1<br>,BIN2,FANCM,FANCA,CYBRD1,CNNM4,SEMA3E,RPRD1B,TMEM<br>67,RCL1,ALPL,ABHD17C,TMOD2,MSH2,COL6A6,ZNF397,ATL<br>1,LUC7L,RELL1,HIPK3,EPN2,ABCA10,CLSPN,BICRAL,AFG3<br>L2,MOSMO,MNAT1,TMEM116,MDFIC,CFAP61,ANK3,NIP2A,XY<br>LT1,HMGA2,COG2,BCL11B,VPS41,FOLH1,DOCK5,STK32A,LY<br>PLA1,AK8,LINC01151,CWC27,PLCE1,IL17RA,CRIM1,FUT9,<br>PRR5L,GXYLT2,VPS37A,VAV1,MYT1L,FBXO32,ZNF160,HLA-<br>B,IQSEC1,CACNA1I,PDLIM5,BHLHE40-<br>AS1,EXD3,BLM,NRK,SLC10A7,MAGI3,INTS8,NAP1L4,LIN54<br>,ADCY10,STX12,BMP2,RC3H2,ATP9A,TRAK1,WDR26,GFI1B,<br>RIN3,BMP2K,DNAL1,SLC15A5,SEMA3D,NETO2,POLR3A,TUBG<br>CP3,AP4E1,NFATC2,TDRD7,SH3BP5,SLC23A2,ZNF106,MYOM<br>1,TRAF3,ANKRD26,TTC21B,ZNF875,UIMC1,B4GALT6,LRRFI<br>P1,TSPAN2,PFKFB4,RAP1GAP,IKZF2,SNX8,DRAVIN,DNAH8,<br>ATF1,CCDC186,KCNH8,CGAS,NHSL1,SLC37A2,GABRR2,CNKS<br>R3,CASP5,VENTX,WDR12,KIF15,PRDM10,CUL1,BTAF1,DAW1<br>,MYL1,ZNF618,FARP1,MOB1B,GOLGA8B,BBS4,LRR8B,MAPK<br>8IP1,CLVS2,COL5A1,CFTR,ME2,TBC1D13,UBASH3A,AHDC1,<br>MRPL13,KITLG,YLPM1,GTTF2I,TADA2A,ZNF208,NMD3,AKAP1<br>0,UBE2E1,PTPRE,REPS1,MTMR2,ZNF608,SH3PXD2A,TBX20,<br>SP110,AFAP1,LGI2,HEPH1,WSB1,TRPM6,PRKCH,SLC12A1,<br>TG,IL6R,ALS2,ZNF627,OR51E1,TDFP1,HEMGN,KANK4,SNX2<br>5,OSCP1,TOX,PTPRB,PDE6A,TSPAN33,TBATA,SCN10A,RBMX<br>2,MAP7,USP7,MON2,ENPP3,PLAGL1,HAAO,FAH,MESD,MOK,K<br>IR2DL4,RALB,NPAS2,YIPF6,CFAP74,CA1,VCAM1,SEL1L,AR<br>HGAP31,TTC37,GSTA3,ZNF169,KIF11,DTX1,ZBTB33,ADA2,<br>FANCL,DYSL5,SLC13A5,ZNF44,SUPT16H,BAZ1A,NPIPA1,C<br>UL5,OR7A17,NEK6,HECTD1,SHROOM3,XRCC4,NMU,GAST,SNA<br>I2,IGHV3-<br>74,BID,SIAH2,OSBPL10,PGAP4,ZBTB80S,COX5A,RXRG,SP3<br>,ERN2,ZNF879,MBTPS2,FLNB,TRIM58,TIAL1,ELF2,ZDHC1 |
|--|--|--|----------------------------------------------------------------------------------------------------------------------------------------------------------------------------------------------------------------------------------------------------------------------------------------------------------------------------------------------------------------------------------------------------------------------------------------------------------------------------------------------------------------------------------------------------------------------------------------------------------------------------------------------------------------------------------------------------------------------------------------------------------------------------------------------------------------------------------------------------------------------------------------------------------------------------------------------------------------------------------------------------------------------------------------------------------------------------------------------------------------------------------------------------------------------------------------------------------------------------------------------------------------------------------------------------------------------------------------------------------------------------------------------------------------------------------------------------------------------------------------------------------------------------------------------------------------------------------------------------------------------------------------------------------------------------------------------------------------------------------------------------------------------------------------------------------------------------------------------------------------------------------------------------------------------------------------------------------------------------------------------------------------------------------------------------------------------------------------------------------------------------------------------------------------------------------------------------------------------------------------------------------------------------------------------------------------------------------------------------------------------------------------------------------------------------------------------------------------------------------------------------------------------------------------------------------------------------------------------------------------------------------------------------------------------------------------------------------------------------------------------------------------------------------------------------------------------------------------------------------------------------------------------------------------------------------------------------------------------------------------------------------------------------------------------------------------------------------------------------------------------------------------------------------------------------------------------------------------------------------------------------------------------------------------------------------------------------------------------------------------------------------------------------------------------------------------------------------------------------------------------------------------------------------------------------------------------|



|            |                 |                      |                                                                                                                                                                                                                                                                                                                                                                                                                                                                                                                                                                                                                                                                                                                                                                                                                                                                                                                                                                                                                                                                                                                                                                                                                                                                                                                                                                                                                                                                                                                                                                                                                                                                                                                                                                                                                                                                                                                                                                                                                                                                                                                                                                                                                                                                                                 |
|------------|-----------------|----------------------|-------------------------------------------------------------------------------------------------------------------------------------------------------------------------------------------------------------------------------------------------------------------------------------------------------------------------------------------------------------------------------------------------------------------------------------------------------------------------------------------------------------------------------------------------------------------------------------------------------------------------------------------------------------------------------------------------------------------------------------------------------------------------------------------------------------------------------------------------------------------------------------------------------------------------------------------------------------------------------------------------------------------------------------------------------------------------------------------------------------------------------------------------------------------------------------------------------------------------------------------------------------------------------------------------------------------------------------------------------------------------------------------------------------------------------------------------------------------------------------------------------------------------------------------------------------------------------------------------------------------------------------------------------------------------------------------------------------------------------------------------------------------------------------------------------------------------------------------------------------------------------------------------------------------------------------------------------------------------------------------------------------------------------------------------------------------------------------------------------------------------------------------------------------------------------------------------------------------------------------------------------------------------------------------------|
|            |                 |                      | <p>7, FYCO1, SH3GLB1, PTAR1, SLC22A14, KRT6B, XKR5, SAMHD1, IFT81, ENPP1, MOCS2, TP53I11, TMEM225, UCK2, KCNC1, CSF1, GHRH, PPIL6, EOGT, BCL2L1, SPATA48, KRT25, CTDPI1, ASB4, DHRS3, SMAD5, KIF21B, SYNJ2, TCERG1, SLC40A1, PRAME, HADHA, FAM149B1, CABYR, CIDEC, LPGAT1, MED1, IPCEF1, ATG4B, CDC14B, CFH, NPL, FAT1, HGD, SCML2, PRAMEF25, HDHD5, PTH, SDF4, PRKAA2, CSF2RB, GLYATL1, QSOX2, SOHLH1, ERO1B, PHF20L1, ABHD2, VSTM2A, PLA2G4A, SLC25A52, KIFC1, CAMLG, COX7A2L, ZBTB7C, TEAD1, ANP32B, YBX3, AIMP1, LASP1, FYB2, PCID2, ZNF234, CYP4F22, CIBAR1, PBLD, FICD, CADM1, SSPN, PEG10, NET1, TUBB6, ELOC, ANLN, RNU6-1150P, SLC1A7, VSX1, FSTL1, BPNT1, SVEP1, MADD, HCRTR1, PTL1, ZNF287, ZNF449, PRSS2, CREBBP, MELTF, MRM1, ARL11, SGO1, GORAB, SIAH3, TRPV5, NFKBIA, ABCC8, MT1HL1, ZC3H15, RFC2, ZNF354C, ALX4, RTRAF, ZBTB21, NEDD9, OLFM4, SLC14A2, ATP1A1-AS1, NOXRED1, ASS1, ADGRE3, SAR1A, PPP1R17, BTG3, ERLIN2, TRAPPC3, OTOF1, PCMTD2, ZBTB49, EXOC1, HEPACAM, KRT6A, STOX2, AGO1, PDP2, GID8, ELL2, FAM189A2, NDFIP2, NR2C1, CMTM7, SLC6A11, MARCHF6, GATAD1, MTPN, ABI1, ITGA4, TOP3A, OAZ2, BCAP29, PPME1, ZSCAN30, POU1F1, UBE2J2, TM9SF4, OR6C75, ASB2, CEP120, DHTKD1, ZSCAN5C, CYFIP2, HNRNPM, ACA, KRT85, ASCC2, ST8SIA4, OR13C9, ARID3B, RXRA, ADGRB1, WNT7A, ECHDC1, NDFIP1, MAP3K4, SERPINI2, FOXO6, ERI1, ZNF112, ATP6V1C2, C16ORF72, MAGEL2, OR10H2, PDE2A, LRRC2, SDCBP, DSG1, JPT2, NSMCE1, ZNF813, MLLT1, NCK1, FLVCR1, SCAF8, FGR, RNU6-1007P, SNAP29, C2, SPRR2D, IFNAR1, RNF8, PPIP5K2, CYTH4, INTS13, KIAA0319L, DNMT3L, KHDC4, LHX9, RN7SL767P, WNT2B, PLEKHA3, OCLN, POSTN, CD101, STON1-GTF2A1L, AKAP11, DTHD1, MFSD9, MVB12B, ERP27, CD5L, ANKR D6, SCGN, ASCL3, FEZ2, INIP, LAMB1, DNAH10, ZNF66, KIRREL1, SCARA5, HEATR5A, PSTPIP2, PLCZ1, SLC9A5, FCRLA, DDDO1, GPR55, NSUN2, ANO10, TNFSF11, DPY19L1, ZNF705G, PPM1F, ARL13B, XPO7, ODR4, TMEM63C, SH2D3C, TRNAU1AP, UGP2, ZFYVE28, STT3A, SLC16A9, TET1, ASB3, RAD9A, RP1L1, DDX10, SP OPL, ZNF705D, IFT46, ITGA1, POR, ZNF850, ZNF235, SLC14A1, USP49, NSG2, B9D1, PRDM15, SRGAP3, MACROH2A1, TOGARAM1, CSNK1G1, ZNF705B, ATP6V0D2, CAMK1G, SERPINB2, ATG5, UNK, FLRT2, NUP43, OR2T2, BTBD10, TMEM25, NUDT21, DDX6, PPP1R13B, RFX2, PKNOX2, TTLL11, PRPF18, RNU6-835P, CCDC141, MTREX</p> |
| GO:0016310 | phosphorylation | 0.044065671557724055 | <p>MTOR, KSR1, ERC1, NME7, PIK3C3, MAP3K9, MYO3B, NEK4, EGFR, ANGPT1, CDK12, PRKACB, NEK7, NCOR1, DGKI, SLC8A3, PAK1, EPHA7, RAPGEF2, TAOK3, AGK, LDB2, LRGUK, RPTOR, ADAM10, A DK, NTF3, AURKA, SLC8A1, MAP4K4, BMPR1B, PAK3, ITPKB, PRK CZ, GRB10, MCPH1, RIPK4, PDGFD, GFRA1, PI4K2B, STK38, MYL K3, CCNG2, TLK1, BIRC6, PPARA, RSR1, DAPK1, STK32B, ALPK2, IL34, MELK, BLK, AGPS, LATS2, MUSK, PRKCE, FOXK2, CD44, PTPRO, ALPK3, PRRC1, LIMD1, SPRED2, RPS6KA3, PTPN2, AMBR A1, HIPK3, CLSPN, MNAT1, HMGA2, STK32A, AK8, PLCE1, PRR5L, BLM, NRK, BMP2, BMP2K, SH3BP5, PFKFB4, CNKSR3, MOB1B, MA PK8IP1, KITLG, TADA2A, AKAP10, TRPM6, PRKCH, IL6R, ALS2, SNX25, PTPRB, MOK, RALB, NEK6, ERN2, ENPP1, UCK2, CSF1, SMAD5, PRKAA2, CSF2RB, CADM1, MADD, RTRAF, NEDD9, ABI1, PPM E1, DHTKD1, MAP3K4, SDCBP, MLLT1, NCK1, FGR, PPIP5K2, OCL N, KIRREL1, TNFSF11, PPM1F, SH2D3C, ZFYVE28, MACROH2A1, CSNK1G1, CAMK1G, BTBD10</p>                                                                                                                                                                                                                                                                                                                                                                                                                                                                                                                                                                                                                                                                                                                                                                                                                                                                                                                                                                                                                                                                                                                                                                                                                                                                                                                                                                  |

**Table S7.** GO associations with biological processes (GO Profiler) of 1200 rDNA-contacting genes associated with genes that decrease the number of contacts with rDNA clusters. The search was performed using g:Profiler (<https://biit.cs.ut.ee/gprofiler/gost>). Related to Figure 2C.

| GO.ID      | Descripti<br>on                         | padj                      | Genes                                                                                                                                                                                                                                                                                                                                                                                                                                                                                                                                                                                                                                                                                                                                                                                                                                                                                                                                                                                                                                                                                                                                                                                                                                                                                                                                                                                                                                                                                                                                                                                                                                                                                                                                                                                                                                                                                                                                                                                                                                                                                                                                                                                                                                                                                                                                                                                                                                                                                                                                                                                                                                                      |
|------------|-----------------------------------------|---------------------------|------------------------------------------------------------------------------------------------------------------------------------------------------------------------------------------------------------------------------------------------------------------------------------------------------------------------------------------------------------------------------------------------------------------------------------------------------------------------------------------------------------------------------------------------------------------------------------------------------------------------------------------------------------------------------------------------------------------------------------------------------------------------------------------------------------------------------------------------------------------------------------------------------------------------------------------------------------------------------------------------------------------------------------------------------------------------------------------------------------------------------------------------------------------------------------------------------------------------------------------------------------------------------------------------------------------------------------------------------------------------------------------------------------------------------------------------------------------------------------------------------------------------------------------------------------------------------------------------------------------------------------------------------------------------------------------------------------------------------------------------------------------------------------------------------------------------------------------------------------------------------------------------------------------------------------------------------------------------------------------------------------------------------------------------------------------------------------------------------------------------------------------------------------------------------------------------------------------------------------------------------------------------------------------------------------------------------------------------------------------------------------------------------------------------------------------------------------------------------------------------------------------------------------------------------------------------------------------------------------------------------------------------------------|
| <b>BP</b>  |                                         |                           |                                                                                                                                                                                                                                                                                                                                                                                                                                                                                                                                                                                                                                                                                                                                                                                                                                                                                                                                                                                                                                                                                                                                                                                                                                                                                                                                                                                                                                                                                                                                                                                                                                                                                                                                                                                                                                                                                                                                                                                                                                                                                                                                                                                                                                                                                                                                                                                                                                                                                                                                                                                                                                                            |
| GO:0032502 | developmen<br>tal<br>process            | 2.0167429786094<br>905e-8 | <i>FTO, BCAR3, TRAPPC9, MGA, LRRC4C, NOTCH2, IMMP2L, SCAPER, FREM1, MYO9A, TAF5, ULK2, UNC13C, SVIL, CLTCL1, NUBPL, DLC1, ZDHHC21, RDX, STXBP1, RALA, IL1RAPL2, BCL2, PRDM16, ALDH1A2, ARHGAP26, ZEB1, AKR1C3, SDCCAG8, FGD4, SPRED1, MYO1E, PLPPR1, ALK, FOXJ2, CARMIL1, PAPP2, RIN2, ANO6, MAP4, APC, ZMYM4, RBFOX3, PLPPR5, CRKL, ILDR2, SETD2, ARHGAP24, TNIK, SLC4A10, PTPRJ, MYOF, SND1, BCL11A, TMEM182, CECR2, CHSY1, FLI1, ATP2B2, RXFP1, C5, FLT1, EDAR, CABLES1, PRKD1, CHRM3, LRP2, FGF12, ONECUT1, SMYD3, HERC2, GRM7, RETREG1, LUZP1, SSBP3, TBCD, NEDD4L, ZHX3, ABCB5, DCLK1, GABRG2, HERPUD2, PTPRR, FIG4, CMIP, ABCD2, THSD7A, ARNT, TRPC5, NBN, RBM47, CALD1, SNTG2, DIP2A, MSH6, COL27A1, HECW1, PHF19, MRTFA, ESS2, FRYL, SHC4, BRINP1, ADAM22, CRISPLD2, KMT2E, NCAM1, GABPA, LCE1F, CHN1, ACSBG1, PAFAH1B1, EFEMP1, TLL1, DCAF1, ITGB8, NF2, CTNNA1, PPP1R9A, CDH7, MEIS2, MRTFB, PRTG, NR5A2, FOXJ3, PCDH11Y, AGO2, DYSF, ANK2, BRWD1, SYNE2, WNT9B, ANKS6, SMARCA4, CDH11, FABP7, CXADR, ATRX, PTPN12, HDAC4, SLC1A1, PRKAA1, CRTAC1, L3MBTL3, CAMK4, FGF10, CDHR3, TGM1, INO80D, RASGRF1, SYNE1, ZNF675, SH3GL3, NXN, FBN2, EGF, PDE3A, ADAMTS2, HTR2A, CYP4A11, DAZL, KREMEN1, MARK2, FHL2, IGF2BP3, ANKRD17, APBA2, CDKN2C, EVC, KNDC1, GFRA2, RBBP8, EMILIN2, MYOM2, CREM, MBP, TRPS1, TGFA, HIP1, NPHP4, PACSIN2, MTHFD1L, SNX3, BRCA2, CFAP97, STRN, PSG9, PTC2, MSI2, PDE6C, HMGB1, FGF9, UST, CPAMD8, MDM1, ESRP1, ETS2, PLS1, NIN, SLAMF1, ETS1, SMARCC1, SLC9A4, SMOC2, ZNF431, MAP2, LAMC1, RRBP1, TDRD5, ATF2, HIRA, UMODL1, KPNA1, MYT1, MED27, SELENON, RB1CC1, ZNF541, JPH1, RACGAP1, ACO1, DMC1, CATSPERG, ITSN2, SOX30, PTGFRN, SYBU, SEC24D, CTSB, PLEKHB2, OVOL2, NTN1, HOXC13, CRACR2A, CASZ1, YTHDF3, COLQ, HDAC11, DDHD1, ASH1L, HOXC4, UFD1, PLPP4, CD9, CARD10, DZANK1, NDRG2, BMP5, HDGFL3, INO80, CNMD, VSTM4, MYCL, TNN, PSAP, MICALL2, KDM6A, ATRN, IL33, KL, CSDE1, LMX1A, IL10, TTC39C, MAP6, VASP, ETV6, PALMD, HIPK1, CACYBP, LMX1B, TWIST1, ALKAL2, ISX, CELSR2, PCNA, UFL1, ADAMTS5, SMTN, SMPD4, ITGA6, ATP2B1, GAP43, ADCY9, EXT2, MEOX2, GRXCR1, STAT1, BRMS1L, SHROOM2, ARMC6, PRAMEF2, IMPACT, ADCYAP1R1, NCAPG2, MYOC, MEF2C, RBPMS2, S100B, PRDM13, RAB38, NECTIN1, DRC7, TOP1, LCE3D, EPHA4, EMP1, GABRA5, RSPH1, NUMB, MEGF10, IL17RD, FBXO31, PRKAB1, HS6ST1, MARK4, CDH5, NFKBID, ARHGAP12, CLDN18, CYFIP1, HOATZ, PCDH8, SEMA4D, FAT4, AKR1B1, WNT5B, AMFR, SANBR, DPY19L2, PDCL3, SPAG6, MYL12B, NLRP14, UNC45B, UHRF2, HDAC2, GON4L, TBX15, NCS1, ATP5PF, MAPK9, CRTAM, APELA, GPR137B, FAIM, NRIP1, SNRK, STK36, MB, RRAS2, CD38, VMP1, GNAS, SERPINB7, BMP7, TRAPPC6B, EHMT1</i> |
| GO:0050794 | regulation<br>of<br>cellular<br>process | 5.6208964260267<br>515e-8 | <i>FTO, BCAR3, LONP2, TRAPPC9, MGA, LRRC4C, NOTCH2, ZNF236, MYO9A, TAF5, ULK2, MX2, RFX7, NLK, UNC13C, SVIL, CLTCL1, DLC1, TNRC6B, DPP10, ZDHHC21, PTPRA, ITPR2, RDX, STXBP1, RALA, IL1RAPL2, BCL2, PRDM16, ALDH1A2, ARHGAP26, LRFN2, EPC2, ZEB1, AKR1C3, SDCCAG8, FGD4, SPRED1, MYO1E, PLPPR1, ALK, FOXJ2, CARMIL1, MCTP1, PAPP2, RIN2, ANO6, ZNF880, EGLN3, MAP4, SPON1, APC, ZNF595, HHLA2, TSHZ3, RBFOX3, PLP</i>                                                                                                                                                                                                                                                                                                                                                                                                                                                                                                                                                                                                                                                                                                                                                                                                                                                                                                                                                                                                                                                                                                                                                                                                                                                                                                                                                                                                                                                                                                                                                                                                                                                                                                                                                                                                                                                                                                                                                                                                                                                                                                                                                                                                                                      |

|  |  |  |                                                                                                                                                                                                                                                                                                                                                                                                                                                                                                                                                                                                                                                                                                                                                                                                                                                                                                                                                                                                                                                                                                                                                                                                                                                                                                                                                                                                                                                                                                                                                                                                                                                                                                                                                                                                                                                                                                                                                                                                                                                                                                                                                                                                                                                                                                                                                                                                                                                                                                                                                                                                                                                                                                                                                                                                                                                                                                                            |
|--|--|--|----------------------------------------------------------------------------------------------------------------------------------------------------------------------------------------------------------------------------------------------------------------------------------------------------------------------------------------------------------------------------------------------------------------------------------------------------------------------------------------------------------------------------------------------------------------------------------------------------------------------------------------------------------------------------------------------------------------------------------------------------------------------------------------------------------------------------------------------------------------------------------------------------------------------------------------------------------------------------------------------------------------------------------------------------------------------------------------------------------------------------------------------------------------------------------------------------------------------------------------------------------------------------------------------------------------------------------------------------------------------------------------------------------------------------------------------------------------------------------------------------------------------------------------------------------------------------------------------------------------------------------------------------------------------------------------------------------------------------------------------------------------------------------------------------------------------------------------------------------------------------------------------------------------------------------------------------------------------------------------------------------------------------------------------------------------------------------------------------------------------------------------------------------------------------------------------------------------------------------------------------------------------------------------------------------------------------------------------------------------------------------------------------------------------------------------------------------------------------------------------------------------------------------------------------------------------------------------------------------------------------------------------------------------------------------------------------------------------------------------------------------------------------------------------------------------------------------------------------------------------------------------------------------------------------|
|  |  |  | <p> PR5,CRKL,ILDR2,SETD2,ARHGAP24,TNIK,SLC4A10,PTPRJ,ZNF280B,BACH1,RGS3,MTRF1,SND1,SCAI,BCL11A,FAM83F,TMEM182,SGMS1,GRIK3,CHSY1,FLI1,RPRD1A,RXFP1,C5,ZFAND6,FLT1,ZNF648,RFC3,RABEP1,ZNF382,TASP1,INVS,EDAR,CRACD,NUP214,CABLES1,PRKD1,TPTE2,CHRM3,PELI2,LRP2,FGF12,ONECUT1,TAF44,BTBD11,CCL28,SMYD3,GRM7,SEPTIN9,RETREG1,TMEM117,THADA,SSBP3,RALGAPA1,CELF2,TBCD,NEDD4L,TRPM1,ZHX3,DCLK1,GABRG2,DOCK8,MAPRE2,ZNF600,NDUFAF2,CD2AP,ZNF723,PARN,HERPUD2,PTPRR,FIG4,KCNE4,HIVEP2,ABCD2,ARNT,KCNK10,RANBP2,TRPC5,UBE2E2,NBN,TAF15,MSH6,ARHGAP32,RAB27B,HECW1,PHF19,MRTFA,DUSP22,ZKSCAN5,SHC4,BRINP1,KCNJ1,HRH2,ADAM22,KMT2E,PCGF5,SYT10,PPP1R1C,ARHGEF17,ANKFY1,NCAM1,SLC16A1,GABPA,ZNF735,CHN1,GLP2R,LIMCH1,PAFAH1B1,EFEMP1,TM7SF3,DCAF1,ITGB8,STON2,VPS13D,NF2,CNKR2,HIVEP1,CTNNA1,PPP1R9A,MOB3B,AKAP9,MEIS2,ERMP1,MRTFB,PRTG,RGL1,NR5A2,GRM1,FOXJ3,GABRG1,PCDH11Y,PPP2R5E,PLA2R1,AGO2,RIC8B,DYSF,ANK2,BRWD1,SYNE2,WNT9B,ZNF606,DUSP16,SMARCA4,CDH11,FABP7,TNRC6C,SPG21,CXADR,ATRX,NUAK1,PTPN12,HDAC4,SLC1A1,PRKAA1,ITGB3BP,L3MBTL3,NFAT5,GUCY1A2,TOX3,CAMK4,BAZ2A,CPSF3,FGF10,ZC3HAV1,TGM1,INO80D,CLIP1,RASGRF1,ZNF675,SH3GL3,NXN,WNK2,ESRRG,FBN2,EGF,P2RX6,PDE3A,SCG5,MTMR3,TRIM5,RFC1,CLEC16A,STK38L,HTR2A,DAZL,GTTF2F2,KREMEN1,TAF3,MARK2,GCSAML,EBF3,ZNF33B,FHL2,ADGRA3,CNIH3,IGF2BP3,ANKRD17,APBA2,SLC2A13,CDKN2C,EVC,GRK3,KNDC1,SPSB4,NOS2,STK10,GFRA2,RBBP8,EMILIN2,CCND3,ZIM3,CREM,MBP,TRPS1,TGFA,HIP1,GSR,ATP6V1E1,UTP4,CAPN5,RUFY2,NPHP4,PACSIN2,SNX3,NAA35,BRCA2,ZBTB2,ASB7,STRN,OR9Q1,ZNF121,PSG9,CDC42BPB,SOGA1,PTCD2,RALGAPA2,ZC3H14,RANBP9,RESF1,TMEM161A,PDE6C,LEMD3,HMGB1,FGF9,UST,MDM1,ZNF567,ESRP1,ETS2,GEMIN5,DSTYK,PLS1,NIN,SLAMF1,ETS1,FAM83B,SMARCC1,SNX6,SMOC2,ZFYVE26,ZNF431,MAP2,LAMC1,NEK10,ATF2,HIRA,CYLD,UMODL1,PSG6,ITGA9,KPNA1,RGMB,ZZEF1,DNAJC7,MYT1,MED27,SELENON,RB1CC1,ZNF541,ZBED9,JPH1,LALBA,PKP1,RACGAP1,NLRC5,ACO1,CNOT6L,FBLN5,SLC4A4,ZFP90,COPS8,ZNF124,ITSN2,SOX30,ZNF780B,CTSB,SUMO3,SLC15A2,PLEKHB2,BZW1,OVOL2,NTN1,RRAGD,BANP,HOXC13,CRACR2A,CASZ1,BMF,YTHDF3,DEDD2,COLQ,DDHD1,SUMO2,HS1BP3,ZNF292,PDE4DIP,POGK,ASH1L,HOXC4,ABCA4,UFD1,TOM1,PLPP4,CD9,CARD10,RALGPS2,ANAPC1,NDRG2,BMP5,HDGFL3,SERPINB9,GRB14,INO80,IGHV2-70D,CLNS1A,CNMD,KCNK5,MYCL,TNN,PSAP,MICALL2,PCNT,IL33,GPRC5C,KL,RASGEF1C,CSDE1,LMX1A,ILL10,OR1L6,SFPQ,RIOK1,DIRAS2,SKA1,LARP6,ITPRIP,MAP6,VASP,ETV6,RAB12,RPS12,MORC2,SREBF2,THNSL2,HIPK1,CISD1,ZNF518A,DGKK,CD70,CENPE,LMX1B,NGDN,TWIST1,ALKAL2,RPF2,ZBTB38,ISX,PTGS1,CELSR2,PCNA,UFL1,OR2T3,BRD4,SERBP1,NRBP1,ITGA6,ATP2B1,GAP43,IGHV10R15-9,ADCY9,CNIH1,ZNF528,ZNF611,CIDEA,ARFGEF3,EXT2,MEOX2,SLC6A1,STAT1,BRMS1L,KCNJ18,PRAMEF2,IMPACT,PARK7,MED12L,ADCYAP1R1,NCAPG2,MYOCD,EFHB,MEF2C,ZNF613,RBPMS2,S100B,PRDM13,RAD51AP1,RAB38,DBF4B,NECTIN1,SPPL2B,ZBTB25,PASK,CWC22,ATP6V1B2,CXCL2,EPHA4,GABRA5,NUMB,ZBTB10,MEGF10,IL17RD,FBXO31,EXTL3,PRKAB1,MARK4,CDH5,NFKBID,ARHGAP12,CLDN18,APIP,CYFIP1,PCDH8,SEMA4D,MC2R,FAT4,IMPA2,AKR1B1,WNT5B,AM </p> |
|--|--|--|----------------------------------------------------------------------------------------------------------------------------------------------------------------------------------------------------------------------------------------------------------------------------------------------------------------------------------------------------------------------------------------------------------------------------------------------------------------------------------------------------------------------------------------------------------------------------------------------------------------------------------------------------------------------------------------------------------------------------------------------------------------------------------------------------------------------------------------------------------------------------------------------------------------------------------------------------------------------------------------------------------------------------------------------------------------------------------------------------------------------------------------------------------------------------------------------------------------------------------------------------------------------------------------------------------------------------------------------------------------------------------------------------------------------------------------------------------------------------------------------------------------------------------------------------------------------------------------------------------------------------------------------------------------------------------------------------------------------------------------------------------------------------------------------------------------------------------------------------------------------------------------------------------------------------------------------------------------------------------------------------------------------------------------------------------------------------------------------------------------------------------------------------------------------------------------------------------------------------------------------------------------------------------------------------------------------------------------------------------------------------------------------------------------------------------------------------------------------------------------------------------------------------------------------------------------------------------------------------------------------------------------------------------------------------------------------------------------------------------------------------------------------------------------------------------------------------------------------------------------------------------------------------------------------------|

|            |                                    |                       |                                                                                                                                                                                                                                                                                                                                                                                                                                                                                                                                                                                                                                                                                                                                                                                                                                                                                                                                                                                                                                                                                                                                                                                                                                                                                                                                                                                                                                                                                                                                                                                                                                                                                                                                                                                                                                                                                                                                                                                                                                                                                         |
|------------|------------------------------------|-----------------------|-----------------------------------------------------------------------------------------------------------------------------------------------------------------------------------------------------------------------------------------------------------------------------------------------------------------------------------------------------------------------------------------------------------------------------------------------------------------------------------------------------------------------------------------------------------------------------------------------------------------------------------------------------------------------------------------------------------------------------------------------------------------------------------------------------------------------------------------------------------------------------------------------------------------------------------------------------------------------------------------------------------------------------------------------------------------------------------------------------------------------------------------------------------------------------------------------------------------------------------------------------------------------------------------------------------------------------------------------------------------------------------------------------------------------------------------------------------------------------------------------------------------------------------------------------------------------------------------------------------------------------------------------------------------------------------------------------------------------------------------------------------------------------------------------------------------------------------------------------------------------------------------------------------------------------------------------------------------------------------------------------------------------------------------------------------------------------------------|
|            |                                    |                       | FR,NENF,POMT2,ZNF845,OR4L1,SAMD13,ICA1,TPTE,PDCL3,SRP9,CNKSR1,CHCHD2,CDC45,OR11G2,BUB1,SDE2,RBMS3,UHRF2,HDAC2,SLF1,GON4L,TBX15,NC S1,ALB,MAPK9,CRTAM,APELA,GPR137B,SPTB,MIDEA S,FAIM,ZNF615,RNF138,NRIP1,ZNF738,SNRK,TM9S F2,STK36,RRAS2,GNA14,CD38,VMP1,GNAS,SERPINB 7,DHX29,BMP7,TNFAIP8,RNF217,CNOT7,IL20RB,NS D1,EHMT1                                                                                                                                                                                                                                                                                                                                                                                                                                                                                                                                                                                                                                                                                                                                                                                                                                                                                                                                                                                                                                                                                                                                                                                                                                                                                                                                                                                                                                                                                                                                                                                                                                                                                                                                                              |
| GO:0048856 | anatomical structure development   | 1.1694466254793915e-7 | FTO,BCAR3,TRAPPC9,LRRC4C,NOTCH2,IMMP2L,SCAPER,FREM1,MYO9A,TAF A5,ULK2,SVIL,CLTCL1,NUBPL,DLC1,ZDHHC21,RDX,STXBP1,RALA,IL1RAPL2,BCL2,ALDH1A2,ARHGAP26,ZEB1,AKR1C3,SDCCAG8,FGD4,SPRED1,MYO1E,PLPPR1,ALK,FOXJ2,CARMIL1,PAPPA2,RIN2,ANO6,MAP4,APC,ZMYM4,RBFOX3,PLPPR5,CRKL,ILDR2,SETD2,ARHGAP24,TNIK,SLC4A10,PTPRJ,MYOF,BCL11A,TMEM182,CECR2,CHSY1,FLI1,ATP2B2,RXFP1,C5,FLT1,EDAR,CABLES1,PRKD1,CHRM3,LRP2,FGF12,ONECUT1,SMYD3,GRM7,LUZP1,SSBP3,TBCD,NEDD4L,ABCB5,DCLK1,GABRG2,PTPRR,FIG4,CMIP,ABCD2,THSD7A,ARNT,TRPC5,NBN,RBM47,CALD1,SNTG2,DIP2A,MSH6,COL27A1,HECW1,MRTFA,ESS2,FRYL,BRINP1,ADAM22,CRISPLD2,KMT2E,NCAM1,GABPA,LCE1F,CHN1,ACSBG1,PAFAH1B1,EFEMP1,TLL1,DCAF1,ITGB8,NF2,CTNNA1,PPP1R9A,CDH7,MEIS2,MRTFB,PRTG,NR5A2,AGO2,DYSF,ANK2,BRWD1,SYNE2,WNT9B,ANKS6,SMARCA4,CDH11,FABP7,CXADR,ATRX,PTPN12,HDAC4,SLC1A1,PRKAA1,CRTAC1,L3MBTL3,CAMK4,FGF10,CDHR3,TGM1,INO80D,RASGRF1,SYNE1,ZNF675,SH3GL3,NXN,FBN2,EGF,PDE3A,ADAMTS2,CYP4A11,DAZL,KREMEN1,MARK2,FHL2,IGF2BP3,ANKRD17,APBA2,CDKN2C,EVC,KNDC1,GFRA2,RBBP8,EMILIN2,MYOM2,MBP,TRPS1,TGFA,NPHP4,PACSIN2,MTHFD1L,SNX3,BRCA2,STRN,PSG9,PTCD2,MSI2,PDE6C,HMGB1,FGF9,UST,CPAMD8,MDM1,ESRP1,ETS2,PLS1,NIN,SLAMF1,ETS1,SMARCC1,SLC9A4,SMOC2,MAP2,LAMC1,TD RD5,ATF2,HIRA,UMODL1,KPNA1,MYT1,SELENON,RB1CC1,JPH1,RACGAP1,ACO1,DMC1,ITSN2,SOX30,PTGFRN,SYBU,SEC24D,CTSB,OVOL2,NTN1,HOXC13,CRACR2A,CASZ1,YTHDF3,COLQ,HDAC11,DDHD1,ASH1L,HOXC4,UFD1,PLPP4,CD9,CARD10,DZANK1,NDRG2,BMP5,HDGFL3,INO80,CNMD,VSTM4,MYCL,TNN,PSAP,MICALL2,KDM6A,ATRN,IL33,KL,CSDE1,LMX1A,IL10,TTC39C,MAP6,VASP,ETV6,PALMD,HIPK1,CACYBP,LMX1B,TWIST1,ALKAL2,ISX,CELSR2,PCNA,UFL1,ADAMTS5,SMTN,SMPD4,ITGA6,ATP2B1,GAP43,ADCY9,EXT2,MEOX2,GRXCR1,STAT1,SHROOM2,ARMC6,IMPACT,ADCYA P1R1,NCAPG2,MYOCD,MEF2C,RBPMS2,S100B,PRDM13,NECTIN1,DRC7,TOP1,LCE3D,EPHA4,EMP1,GABRA5,RSPH1,NUMB,MEGF10,IL17RD,FBXO31,PRKAB1,HS6S T1,MARK4,CDH5,NFKBID,ARHGAP12,CLDN18,CYFIP1,PCDH8,SEMA4D,FAT4,AKR1B1,WNT5B,SANBR,DPY19L2,PDCL3,SPAG6,MYL12B,UNC45B,HDAC2,GON4L,TBX15,NCS1,ATP5PF,CRTAM,APELA,GPR137B,FAIM,NRIP1,SNRK,STK36,MB,RRAS2,CD38,VMP1,GNAS,SERP INB7,BMP7,TRAPPC6B,EHMT1 |
| GO:0007275 | multicellular organism development | 2.5895630451827137e-7 | BCAR3,TRAPPC9,LRRC4C,NOTCH2,IMMP2L,SCAPER,FREM1,MYO9A,TAF A5,ULK2,DLC1,ZDHHC21,STXBP1,RALA,IL1RAPL2,BCL2,ALDH1A2,ARHGAP26,ZEB1,AKR1C3,SDCCAG8,SPRED1,MYO1E,PLPPR1,ALK,FOXJ2,PAPPA2,RIN2,ANO6,MAP4,APC,RBFOX3,PLPPR5,CRKL,SETD2,ARHGAP24,TNIK,SLC4A10,PTPRJ,BCL11A,CECR2,CHSY1,FLI1,ATP2B2,RXFP1,C5,FLT1,EDAR,CABLES1,PRKD1,CHRM3,LRP2,FGF12,ONECUT1,GRM7,LUZP1,SSBP3,TBCD,NEDD4L,ABCB5,DCLK1,GABRG2,PTPRR,FIG4,CMIP,ABCD2,THSD7A,ARNT,TRPC5,NBN,RBM47,CALD1,SNTG2,DIP2A,MSH6,COL27A1,HECW1                                                                                                                                                                                                                                                                                                                                                                                                                                                                                                                                                                                                                                                                                                                                                                                                                                                                                                                                                                                                                                                                                                                                                                                                                                                                                                                                                                                                                                                                                                                                                                                              |

|                |                           |                              |                                                                                                                                                                                                                                                                                                                                                                                                                                                                                                                                                                                                                                                                                                                                                                                                                                                                                                                                                                                                                                                                                                                                                                                                                                                                                                                                                                                                                                                                                                                                                                                                                                                                                                                                                                                                                   |
|----------------|---------------------------|------------------------------|-------------------------------------------------------------------------------------------------------------------------------------------------------------------------------------------------------------------------------------------------------------------------------------------------------------------------------------------------------------------------------------------------------------------------------------------------------------------------------------------------------------------------------------------------------------------------------------------------------------------------------------------------------------------------------------------------------------------------------------------------------------------------------------------------------------------------------------------------------------------------------------------------------------------------------------------------------------------------------------------------------------------------------------------------------------------------------------------------------------------------------------------------------------------------------------------------------------------------------------------------------------------------------------------------------------------------------------------------------------------------------------------------------------------------------------------------------------------------------------------------------------------------------------------------------------------------------------------------------------------------------------------------------------------------------------------------------------------------------------------------------------------------------------------------------------------|
|                |                           |                              | <p>,ESS2,FRYL,BRINP1,ADAM22,CRISPLD2,KMT2E,NCA<br/>M1,GABPA,CHN1,ACSBG1,PAFAH1B1,EFEMP1,TLL1,D<br/>CAF1,ITGB8,NF2,CTNNA1,PPP1R9A,MEIS2,PRTG,NR<br/>5A2,AGO2,ANK2,SYNE2,WNT9B,ANKS6,SMARCA4,CDH<br/>11,FABP7,CXADR,ATRX,HDAC4,SLC1A1,CRTAC1,L3M<br/>BTL3,CAMK4,FGF10,INO80D,RASGRF1,ZNF675,SH3G<br/>L3,NXN,FBN2,EGF,ADAMTS2,CYP4A11,KREMEN1,MAR<br/>K2,FHL2,IGF2BP3,ANKRD17,APBA2,CDKN2C,EVC,KN<br/>DC1,GFRA2,RBBP8,EMILIN2,MBP,TRPS1,TGFA,NPHP<br/>4,MTHFD1L,SNX3,BRCA2,STRN,PSG9,PTCD2,PDE6C,<br/>HMGB1,FGF9,UST,CPAMD8,MDM1,ESRP1,ETS2,PLS1,<br/>NIN,SLAMF1,ETS1,SMARCC1,SMOC2,MAP2,TDRD5,AT<br/>F2,HIRA,UMODL1,MYT1,SELENON,RB1CC1,RACGAP1,<br/>ACO1,DMC1,ITSN2,SYBU,SEC24D,OVOL2,NTN1,HOXC<br/>13,CRACR2A,CASZ1,YTHDF3,COLQ,HDAC11,ASH1L,H<br/>OXC4,UFD1,PLPP4,CD9,CARD10,DZANK1,NDRG2,BMP<br/>5,HDGFL3,INO80,CNMD,VSTM4,MYCL,TNN,PSAP,MIC<br/>ALL2,KDM6A,ATRNL,IL33,KL,CSDE1,LMX1A,IL10,TT<br/>C39C,MAP6,VASP,ETV6,HIPK1,CACYBP,LMX1B,TWIS<br/>T1,ALKAL2,ISX,CELSR2,PCNA,UFL1,SMPD4,ITGA6,<br/>ATP2B1,GAP43,ADCY9,EXT2,MEOX2,GRXCR1,STAT1,<br/>SHROOM2,ARMC6,IMPACT,ADCYAP1R1,NCAPG2,MYOCD<br/>,MEF2C,RBPMS2,S100B,PRDM13,NECTIN1,TOPI,EPH<br/>A4,GABRA5,NUMB,FBXO31,PRKAB1,HS6ST1,MARK4,C<br/>DH5,NFKBID,CLDN18,CYFIP1,PCDH8,SEMA4D,FAT4,<br/>AKR1B1,WNT5B,SANBR,PDCL3,SPAG6,UNC45B,HDAC2<br/>,GON4L,TBX15,NCS1,ATP5PF,CRTAM,APELA,GPR137<br/>B,FAIM,NRIP1,SNRK,STK36,MB,RRAS2,CD38,VMP1,<br/>GNAS,SERPINB7,BMP7,TRAPPC6B,EHMT1</p>                                                                                                                                                                                                                                                                                                                                                                         |
| GO:004<br>8731 | system<br>developmen<br>t | 0.0000017246278<br>539398789 | <p>BCAR3,TRAPPC9,LRRC4C,NOTCH2,IMMP2L,SCAPER,F<br/>REM1,MYO9A,TAF45,ULK2,DLC1,STXBP1,RALA,IL1R<br/>APL2,BCL2,ALDH1A2,ARHGAP26,ZEB1,AKR1C3,SDCC<br/>AG8,SPRED1,MYO1E,PLPPR1,ALK,FOXJ2,PAPPA2,RI<br/>N2,MAP4,APC,RBFOX3,PLPPR5,CRKL,SETD2,ARHGAP<br/>24,TNII,SLC4A10,PTPRJ,BCL11A,CECR2,CHSY1,FL<br/>I1,ATP2B2,RXFP1,C5,FLT1,EDAR,CABLES1,PRKD1,<br/>CHRM3,LRP2,FGF12,ONECUT1,GRM7,LUZP1,SSBP3,T<br/>BCD,NEDD4L,ABCB5,DCLK1,GABRG2,FIG4,ABCD2,TH<br/>SD7A,ARNT,TRPC5,NBN,RBM47,CALD1,SNTG2,DIP2A<br/>,MSH6,COL27A1,HECW1,ESS2,FRYL,BRINP1,ADAM22<br/>,CRISPLD2,KMT2E,NCAM1,GABPA,CHN1,ACSBG1,PAF<br/>AH1B1,EFEMP1,TLL1,DCAF1,ITGB8,NF2,CTNNA1,PP<br/>P1R9A,MEIS2,PRTG,AGO2,ANK2,SYNE2,WNT9B,ANKS<br/>6,SMARCA4,CDH11,FABP7,CXADR,ATRX,HDAC4,SLC1<br/>A1,CRTAC1,L3MBTL3,CAMK4,FGF10,RASGRF1,ZNF67<br/>5,SH3GL3,NXN,FBN2,EGF,ADAMTS2,CYP4A11,KREME<br/>N1,MARK2,FHL2,IGF2BP3,ANKRD17,APBA2,CDKN2C,<br/>EVC,KNDC1,GFRA2,EMILIN2,MBP,TRPS1,TGFA,NPHP<br/>4,MTHFD1L,SNX3,BRCA2,STRN,PSG9,PTCD2,PDE6C,<br/>HMGB1,FGF9,UST,CPAMD8,MDM1,ESRP1,ETS2,PLS1,<br/>NIN,SLAMF1,ETS1,SMARCC1,SMOC2,MAP2,ATF2,UMO<br/>DL1,MYT1,SELENON,RB1CC1,RACGAP1,DMC1,ITSN2,<br/>SYBU,OVOL2,NTN1,CRACR2A,CASZ1,COLQ,HDAC11,A<br/>SH1L,HOXC4,UFD1,CD9,CARD10,DZANK1,NDRG2,BMP<br/>5,HDGFL3,CNMD,VSTM4,MYCL,TNN,PSAP,MICALL2,K<br/>DM6A,ATRNL,IL33,CSDE1,LMX1A,IL10,MAP6,VASP,E<br/>TV6,HIPK1,CACYBP,LMX1B,TWIST1,ALKAL2,ISX,CE<br/>LSR2,PCNA,UFL1,ITGA6,ATP2B1,GAP43,EXT2,MEOX<br/>2,GRXCR1,STAT1,SHROOM2,ARMC6,IMPACT,NCAPG2,<br/>MYOCD,MEF2C,RBPMS2,S100B,PRDM13,NECTIN1,EPH<br/>A4,GABRA5,NUMB,FBXO31,HS6ST1,MARK4,CDH5,NFK<br/>BID,CLDN18,CYFIP1,SEMA4D,FAT4,AKR1B1,WNT5B,<br/>SANBR,PDCL3,SPAG6,UNC45B,HDAC2,GON4L,TBX15,<br/>NCS1,ATP5PF,CRTAM,APELA,GPR137B,FAIM,NRIP1,<br/>SNRK,STK36,MB,RRAS2,CD38,GNAS,SERPINB7,BMP7<br/>,TRAPPC6B</p> |

|            |                              |                         |                                                                                                                                                                                                                                                                                                                                                                                                                                                                                                                                                                                                                                                                                                                                                                                                                                                                                                                                                                                                                                                                                                                                                                                                                                                                                                                                                                                                                                                                                                                                                   |
|------------|------------------------------|-------------------------|---------------------------------------------------------------------------------------------------------------------------------------------------------------------------------------------------------------------------------------------------------------------------------------------------------------------------------------------------------------------------------------------------------------------------------------------------------------------------------------------------------------------------------------------------------------------------------------------------------------------------------------------------------------------------------------------------------------------------------------------------------------------------------------------------------------------------------------------------------------------------------------------------------------------------------------------------------------------------------------------------------------------------------------------------------------------------------------------------------------------------------------------------------------------------------------------------------------------------------------------------------------------------------------------------------------------------------------------------------------------------------------------------------------------------------------------------------------------------------------------------------------------------------------------------|
| GO:0048869 | cellular development process | 0.00001749156392819301  | FTO,TRAPPC9,MGA,LRRC4C,NOTCH2,MYO9A,ULK2,NUBPL,ZDHHC21,RDX,STXBP1,BCL2,PRDM16,ALDH1A2,ZEB1,AKR1C3,SDCCAG8,SPRED1,MYO1E,ALK,FOXJ2,CARMIL1,RIN2,MAP4,APC,PLPPR5,CRKL,ILDR2,SETD2,ARHGAP24,TNIK,SLC4A10,PTPRJ,MYOF,SND1,BCL11A,TMEM182,CECR2,CHSY1,FLI1,ATP2B2,RXFP1,FLT1,EDAR,PRKD1,LRP2,ONECUT1,SMYD3,GRM7,RETRREG1,SSBP3,TBCD,NEDD4L,ZHX3,ABCB5,DCLK1,FIG4,THSD7A,ARNT,TRPC5,RBM47,DIP2A,COL27A1,HECW1,PHF19,MRTFA,FRYL,SHC4,BRINP1,ADAM22,KMT2E,NCAM1,GABPA,LCE1F,CHN1,PAFAH1B1,EFEMP1,TLL1,DCAF1,ITGB8,NF2,CTNNA1,PPP1R9A,MEIS2,MRTFB,PRTG,NR5A2,FOXJ3,DYSF,ANK2,SYNE2,WNT9B,SMARCA4,CDH11,CXADR,ATRX,HDAC4,SLC1A1,CRTAC1,L3MBTL3,CAMK4,FGF10,TGM1,RASGRF1,SYNE1,ZNF675,SH3GL3,NXN,FBN2,PDE3A,HTR2A,DAZL,KREMEN1,MARK2,FHL2,ANKRD17,CDKN2C,KNDC1,MYOM2,CREM,MBP,TRPS1,HIP1,NPHP4,SNX3,BRCA2,STRN,PSG9,PTCD2,MSI2,PDE6C,HMGB1,FGF9,UST,ESRP1,ETS2,PLS1,NIN,SLAMF1,ETS1,SMARCC1,SLC9A4,ZNF431,MAP2,LAMC1,RRBP1,TDRD5,ATF2,HIRA,MYT1,SELENON,ZNF541,RACGAP1,DMC1,CATSPERG,ITSN2,SOX30,PTGFRN,CTSB,PLEKHB2,OVOL2,NTN1,CRACR2A,CASZ1,HDAC11,CD9,DZANK1,NDRG2,BMP5,HDGFL3,CNMD,MYCL,TNN,PSAP,MICALL2,KDM6A,ATRN,IL33,LMX1A,IL10,MAP6,VASP,ETV6,HIPK1,LMX1B,TWIST1,ALKAL2,CELSR2,PCNA,UFL1,ADAMTS5,ITGA6,GAP43,EXT2,GRXCR1,STAT1,ARMC6,PRAMEF2,IMPACT,ADCYAP1R1,NCAPG2,MYOCD,MEF2C,RBPMS2,S100B,PRDM13,RAB38,NECTIN1,DRC7,LCE3D,EPHA4,GABRA5,RSPH1,NUMB,MEGF10,IL17RD,FBXO31,HS6ST1,CDH5,NFKBID,CLDN18,CYFIP1,SEMA4D,FAT4,AKR1B1,WNT5B,DPY19L2,SPAG6,NLRP14,UNC45B,UHRF2,HDAC2,GON4L,TBX15,NCS1,MAPK9,CRTAM,APELA,GPRI37B,FAIM,SNRK,MB,RRAS2,CD38,BMP7 |
| GO:0030154 | cell differentiation         | 0.000026321432572629996 | FTO,TRAPPC9,MGA,LRRC4C,NOTCH2,MYO9A,ULK2,ZDHHC21,RDX,STXBP1,BCL2,PRDM16,ALDH1A2,ZEB1,AKR1C3,SDCCAG8,SPRED1,MYO1E,ALK,FOXJ2,CARMIL1,RIN2,MAP4,APC,PLPPR5,CRKL,ILDR2,SETD2,ARHGAP24,TNIK,SLC4A10,PTPRJ,MYOF,SND1,BCL11A,TMEM182,CECR2,CHSY1,FLI1,ATP2B2,RXFP1,FLT1,EDAR,PRKD1,LRP2,ONECUT1,SMYD3,GRM7,RETRREG1,SSBP3,TBCD,NEDD4L,ZHX3,ABCB5,DCLK1,FIG4,THSD7A,ARNT,TRPC5,RBM47,DIP2A,COL27A1,HECW1,PHF19,MRTFA,FRYL,SHC4,BRINP1,ADAM22,KMT2E,NCAM1,GABPA,LCE1F,CHN1,PAFAH1B1,EFEMP1,TLL1,DCAF1,ITGB8,NF2,CTNNA1,PPP1R9A,MEIS2,MRTFB,PRTG,NR5A2,FOXJ3,DYSF,ANK2,SYNE2,WNT9B,SMARCA4,CDH11,CXADR,ATRX,HDAC4,SLC1A1,CRTAC1,L3MBTL3,CAMK4,FGF10,TGM1,RASGRF1,SYNE1,ZNF675,SH3GL3,NXN,FBN2,PDE3A,HTR2A,DAZL,KREMEN1,MARK2,FHL2,ANKRD17,CDKN2C,KNDC1,MYOM2,CREM,MBP,TRPS1,HIP1,NPHP4,SNX3,BRCA2,STRN,PSG9,PTCD2,MSI2,PDE6C,HMGB1,FGF9,UST,ESRP1,ETS2,PLS1,NIN,SLAMF1,ETS1,SMARCC1,SLC9A4,ZNF431,MAP2,LAMC1,RRBP1,TDRD5,ATF2,HIRA,MYT1,SELENON,ZNF541,RACGAP1,DMC1,CATSPERG,ITSN2,SOX30,PTGFRN,CTSB,PLEKHB2,OVOL2,NTN1,CRACR2A,CASZ1,HDAC11,CD9,DZANK1,NDRG2,BMP5,HDGFL3,CNMD,MYCL,TNN,PSAP,MICALL2,KDM6A,ATRN,IL33,LMX1A,IL10,MAP6,VASP,ETV6,HIPK1,LMX1B,TWIST1,ALKAL2,CELSR2,PCNA,UFL1,ADAMTS5,ITGA6,GAP43,EXT2,GRXCR1,STAT1,ARMC6,PRAMEF2,IMPACT,ADCYAP1R1,NCAPG2,MYOCD,MEF2C,RBPMS2,S100B,PRDM13,RAB38,NECTIN1,DRC7,LCE3D,EPHA4,GABRA5,RSPH1,NUMB,MEGF10,IL17RD,FBXO31,HS6ST1,CDH5,NFKBID,C                                                                                                                                                            |

|            |                                    |                        |                                                                                                                                                                                                                                                                                                                                                                                                                                                                                                                                                                                                                                                                                                                                                                                                                                                                                                                                                                                                                                           |
|------------|------------------------------------|------------------------|-------------------------------------------------------------------------------------------------------------------------------------------------------------------------------------------------------------------------------------------------------------------------------------------------------------------------------------------------------------------------------------------------------------------------------------------------------------------------------------------------------------------------------------------------------------------------------------------------------------------------------------------------------------------------------------------------------------------------------------------------------------------------------------------------------------------------------------------------------------------------------------------------------------------------------------------------------------------------------------------------------------------------------------------|
|            |                                    |                        | LDN18,CYFIP1,SEMA4D,FAT4,AKR1B1,WNT5B,DPY19L2,SPAG6,NLRP14,UNC45B,UHRF2,HDAC2,GON4L,TBX15,NCS1,MAPK9,CRTAM,APELA,GPR137B,FAIM,SNRK,MB,RRAS2,CD38,BMP7                                                                                                                                                                                                                                                                                                                                                                                                                                                                                                                                                                                                                                                                                                                                                                                                                                                                                     |
| GO:0007399 | nervous system development         | 0.00011167231795449553 | TRAPPC9,LRRC4C,NOTCH2,IMMP2L,MYO9A,ULK2,DLC1,STXBP1,RALA,IL1RAPL2,BCL2,ALDH1A2,ARHGAP26,ZEB1,SDCCAG8,PLPPR1,ALK,MAP4,APC,RBFOX3,PLPPR5,CRKL,SETD2,TNIIK,SLC4A10,BCL11A,CECR2,ATP2B2,CABLES1,PRKD1,CHRM3,LRP2,FGF12,GRM7,LUZP1,SSBP3,TBCD,NEDD4L,DCLK1,GABRG2,FIG4,ABCD2,TRPC5,SNTG2,DIP2A,HECW1,ESS2,FRYL,BRINP1,ADAM22,NCAM1,CHN1,ACSBG1,PAFAH1B1,NF2,CTNNA1,PPP1R9A,MEIS2,PRTG,ANK2,SYNE2,WNT9B,SMARCA4,CDH11,FABP7,ATRX,HDAC4,SLC1A1,CRTAC1,FGF10,RASGRF1,SH3GL3,EGF,KREMEN1,MARK2,IGF2BP3,APBA2,CDKN2C,KNDC1,GFRA2,MBP,NPHP4,MTHFD1L,SNX3,BRCA2,STRN,PDE6C,HMGB1,FGF9,UST,ESRP1,PLS1,NIN,SMARCC1,MAP2,ATF2,MYT1,RACGAP1,ITSN2,SYBU,OVOL2,NTN1,CASZ1,COLQ,HDAC11,CD9,DZANK1,NDRG2,BMP5,HDGFL3,MYCL,TNN,MICALL2,KDM6A,ATRN,IL33,LMX1A,MAP6,VASP,ETV6,HIPK1,LMX1B,TWIST1,ALKAL2,ISX,CELSR2,UFL1,ITGA6,ATP2B1,GAP43,GRXCR1,SHROOM2,IMPACT,MEF2C,S100B,PRDM13,NECTIN1,EPHA4,GABRA5,NUMB,FBXO31,HS6ST1,MARK4,CYFIP1,SEMA4D,FAT4,WNT5B,SPAG6,HDAC2,NCS1,ATP5PF,FAIM,STK36,RRAS2,CD38,BMP7,TRAPPC6B                                           |
| GO:0009653 | anatomical structure morphogenesis | 0.00027158174772785534 | BCAR3,LRRC4C,NOTCH2,FREM1,MYO9A,TAF4A5,ULK2,CLTCL1,NUBPL,DLC1,RDX,STXBP1,RALA,BCL2,ALDH1A2,ZEB1,SDCCAG8,FGD4,SPRED1,MYO1E,FOXJ2,CARMIL1,PAPPA2,RIN2,ZMYM4,CRKL,SETD2,ARHGAP24,TNIIK,SLC4A10,MYOF,BCL11A,TMEM182,CECR2,CHSY1,FLI1,RXFP1,C5,FLT1,EDAR,PRKD1,LRP2,ONECUT1,LUZP1,SSBP3,TBCD,NEDD4L,DCLK1,FIG4,THSD7A,TRPC5,CALD1,DIP2A,COL27A1,HECW1,MRTFA,FRYL,CRISPLD2,NCAM1,GABPA,CHN1,PAFAH1B1,EFEMP1,ITGB8,NF2,CTNNA1,CDH7,MEIS2,PRTG,NR5A2,AGO2,ANK2,BRWD1,WNT9B,CDH11,ATRX,SLC1A1,FGF10,CDHR3,FBN2,EGF,MARK2,FHL2,IGF2BP3,KNDC1,EMIIN2,MYOM2,MBP,TGFA,PACSIN2,MTHFD1L,PTCD2,PDE6C,FGF9,UST,ETS2,PLS1,NIN,ETS1,SMARCC1,SMOC2,MAP2,LAMC1,ATF2,HIRA,ITSN2,SOX30,PTGFRN,OVOL2,NTN1,HOXC13,DDHD1,ASH1L,HOXC4,CD9,CARD10,DZANK1,BMP5,CNMD,VSTM4,TNN,MICALL2,KDM6A,ATRN,LMX1A,IL10,TTC39C,MAP6,VASP,PALMD,HIPK1,TWIST1,CELSR2,ADAMTS5,ITGA6,GAP43,EXT2,MEOX2,GRXCR1,STAT1,SHROOM2,IMPACT,MYOC,MEF2C,RBPMS2,S100B,NECTIN1,EPHA4,NUMB,FBXO31,HS6ST1,CDH5,ARHGAP12,CYFIP1,PCDH8,SEMA4D,FAT4,WNT5B,PDCL3,SPAG6,MYL12B,HDAC2,TBX15,APELA,GNAS,BMP7 |
| GO:0023051 | regulation of signaling            | 0.0008180579569025943  | BCAR3,LRRC4C,NOTCH2,MYO9A,NLK,UNC13C,DLC1,TPRA,RDX,STXBP1,BCL2,PRDM16,ARHGAP26,LRFN2,ZEB1,AKR1C3,FGD4,SPRED1,ALK,MCTP1,APC,TSHZ3,CRKL,ARHGAP24,TNIIK,SLC4A10,PTPRJ,RGS3,SCAI,SGMS1,GRIK3,CHSY1,ATP2B2,ZFAND6,FLT1,INVS,EDAR,PRKD1,TPTE2,PELI2,LRP2,FGF12,ONECUT1,TAF4A,GRM7,RALGAP1,DOCK8,MAPRE2,NDUFAF2,CD2AP,PTPRR,ARNT,ARHGAP32,HECW1,DUSP22,ARHGEF17,NCAM1,SLC16A1,CHN1,PAFAH1B1,TM7SF3,ITGB8,NF2,CNKSR2,CTNNA1,PPP1R9A,MOB3B,AKAP9,GRM1,PCDH11Y,PLA2R1,RIC8B,ANK2,DUSP16,SMARCA4,CDH11,NUAK1,PTPN12,SLC1A1,PRKAA1,NFAT5,GUCY1A2,FGF10,ZC3HAV1,RASGRF1,ZNF675,NXN,WNK2,FBN2,EGF,PDE3A,SCG5,TRIM5,CLEC16A,HTR2A,KREMEN1,GCSAML,FHL2,CNIH3,ANKRD17,APBA2,EVC,GRK3,                                                                                                                                                                                                                                                                                                                                                                      |

|             |                                   |                        |                                                                                                                                                                                                                                                                                                                                                                                                                                                                                                                                                                                                                                                                                                                                                                                                                                                                                                                                                                                                                                                                                                                                                                                                                                                                            |
|-------------|-----------------------------------|------------------------|----------------------------------------------------------------------------------------------------------------------------------------------------------------------------------------------------------------------------------------------------------------------------------------------------------------------------------------------------------------------------------------------------------------------------------------------------------------------------------------------------------------------------------------------------------------------------------------------------------------------------------------------------------------------------------------------------------------------------------------------------------------------------------------------------------------------------------------------------------------------------------------------------------------------------------------------------------------------------------------------------------------------------------------------------------------------------------------------------------------------------------------------------------------------------------------------------------------------------------------------------------------------------|
|             |                                   |                        | NOS2,CCND3,TGFA,HIP1,NPHP4,PACSIN2,SNX3,BRC A2,RALGAPA2,RANBP9,TMEM161A,LEMD3,HMGB1,FGF 9,DSTYK,SLAMF1,SNX6,SMOC2,LAMC1,NEK10,CYLD, KPNA1,ZZEF1,RB1CC1,RACGAP1,NLRC5,SOX30,SLC1 5A2,OVOL2,RRAGD,CRACR2A,YTHDF3,DEDD2,ASH1L, UFD1,RALGPS2,NDRG2,BMP5,GRB14,TNN,KL,IL10,S FPQ,ITPRIP,RPS12,SREBF2,HIPK1,TWIST1,ALKAL2 ,RPF2,UFL1,BRD4,ITGA6,ATP2B1,CIDEA,ARFGEF3, SLC6A1,STAT1,BRMS1L,PARK7,ADCYAP1R1,NCAPG2, MYOCD,EFHB,MEF2C,RBPM52,S100B,SPPL2B,PASK,E PHA4,IL17RD,CDH5,ARHGAP12,APIP,CYFIP1,SEMA4 D,WNT5B,AMFR,NENF,ICA1,TPTE,RBMS3,HDAC2,MAP K9,APELA,GPR137B,FAIM,STK36,CD38,GNAS,BMP7, CNOT7                                                                                                                                                                                                                                                                                                                                                                                                                                                                                                                                                                                                                                                                          |
| GO:001 0646 | regulation of cell communicat ion | 0.0010133185663 000787 | BCAR3,LRR4C,NOTCH2,MYO9A,NLK,UNC13C,DLC1,P TPRA,RDX,STXBP1,BCL2,PRDM16,ARHGAP26,LRFN2, ZEB1,AKR1C3,FGD4,SPRED1,ALK,MCTP1,APC,TSHZ3 ,CRKL,ARHGAP24,TNIK,SLC4A10,PTPRJ,RGS3,SCAI ,SGMS1,GRIK3,CHSY1,ZFAND6,FLT1,INVS,EDAR,PR KD1,TPTE2,PELI2,LRP2,FGF12,ONECUT1,TAF4,GR M7,RALGAPA1,DOCK8,MAPRE2,NDUFAF2,CD2AP,PTPR R,ARNT,ARHGAP32,HECW1,DUSP22,ARHGEF17,NCAM1 ,SLC16A1,CHN1,PAFAH1B1,TM7SF3,ITGB8,NF2,CNK SR2,CTNNA1,PPP1R9A,MOB3B,AKAP9,GRM1,PCDH11Y ,PLA2R1,RIC8B,ANK2,DUSP16,SMARCA4,CDH11,CXA DR,NUAK1,PTPN12,SLC1A1,PRKAA1,NFAT5,GUCY1A2 ,FGF10,ZC3HAV1,RASGRF1,ZNF675,NXN,WNK2,FBN2 ,EGF,PDE3A,SCG5,TRIM5,CLEC16A,HTR2A,KREMEN1 ,GCSAML,FHL2,CNIH3,ANKRD17,APBA2,EVC,GRK3,N OS2,CCND3,TGFA,HIP1,NPHP4,PACSIN2,SNX3,BRCA 2,RALGAPA2,RANBP9,TMEM161A,LEMD3,HMGB1,FGF9 ,DSTYK,SLAMF1,SNX6,SMOC2,LAMC1,NEK10,CYLD,K PNA1,ZZEF1,RB1CC1,RACGAP1,NLRC5,SOX30,SLC15 A2,OVOL2,RRAGD,CRACR2A,YTHDF3,DEDD2,ASH1L,U FD1,RALGPS2,NDRG2,BMP5,GRB14,TNN,KL,IL10,SF PQ,ITPRIP,RPS12,SREBF2,HIPK1,TWIST1,ALKAL2, RPF2,UFL1,BRD4,ITGA6,CIDEA,ARFGEF3,SLC6A1,S TAT1,BRMS1L,PARK7,ADCYAP1R1,NCAPG2,MYOCD,EF HB,MEF2C,RBPM52,S100B,SPPL2B,PASK,EPHA4,IL1 7RD,CDH5,ARHGAP12,APIP,CYFIP1,SEMA4D,WNT5B, AMFR,NENF,ICA1,TPTE,RBMS3,HDAC2,MAPK9,APELA ,GPR137B,FAIM,STK36,CD38,GNAS,BMP7,CNOT7 |
| GO:005 0789 | regulation of biological process  | 0.0014713848318 905335 | FTO,BCAR3,LONP2,TRAPPC9,MGA,PVT1,LRR4C,NOT CH2,ZNF236,MYO9A,TAF45,ULK2,MX2,RFX7,NLK,UN C13C,SVIL,CLTCL1,DLC1,TNRC6B,DPP10,ZDHHC21, PTPRA,ITPR2,RDX,STXBP1,RALA,IL1RAPL2,BCL2,P RDM16,ALDH1A2,ARHGAP26,LRFN2,EPC2,ZEB1,AKR1 C3,SDCCAG8,FGD4,SPRED1,MYO1E,PLPPR1,ALK,FOX J2,CARMIL1,MCTP1,PAPPA2,RIN2,ANO6,ZNF880,EG LN3,MAP4,SPON1,APC,ZMYM4,ZNF595,HHLA2,TSHZ3 ,RBFOX3,PLPPR5,CRKL,ILDR2,SETD2,ARHGAP24,TN IK,SLC4A10,PTPRJ,ZNF280B,BACH1,RGS3,MTRF1,S ND1,SCAI,BCL11A,FAM83F,TMEM182,SGMS1,GRIK3, CHSY1,FLI1,RPRD1A,ATP2B2,RXFP1,C5,ZFAND6,FL T1,ZNF648,RFC3,RABEP1,ZNF382,TASP1,INVS,EDA R,CRACD,NUP214,CABLES1,PRKD1,TPTE2,CHRM3,PE LI2,LRP2,FGF12,ONECUT1,TAF4,BTBD11,CCL28,S MYD3,GRM7,SEPTIN9,RETREG1,TMEM117,THADA,SSB P3,RALGAPA1,CELF2,TBCD,NEDD4L,TRPM1,ZHX3,DC LK1,GABRG2,DOCK8,MAPRE2,ZNF600,NDUFAF2,CD2A P,ZNF723,PARN,HERPUD2,PTPRR,FIG4,PLGRKT,KCN E4,HIVEP2,ABCD2,ARNT,KCNK10,RANBP2,TRPC5,UB E2E2,NBN,TAF15,DIP2A,MSH6,ARHGAP32,RAB27B,H ECW1,PHF19,MRTFA,DUSP22,ZKSCAN5,SHC4,BRINP1 ,KCNJ1,HRH2,ITIH5,ADAM22,KMT2E,PCGF5,SYT10, PPP1R1C,ARHGEF17,MIR663AHG,ANKFY1,NCAM1,SLC                                                                                                                                                                              |



|            |                       |                       |                                                                                                                                                                                                                                                                                                                                                                                                                                                                                                                                                                                                                                                                                                                                                                                                                                                                                                                                                                                                                                                                                                                                                                                                                                                                                                                                                                                                                                                                                                                                                                                                                                                                                                                                                                                                                                                                                                                                                                                                                                                                                                                                                                                                                                                                                                                                                                                                                                                                                                                                                                                                                                                                                              |
|------------|-----------------------|-----------------------|----------------------------------------------------------------------------------------------------------------------------------------------------------------------------------------------------------------------------------------------------------------------------------------------------------------------------------------------------------------------------------------------------------------------------------------------------------------------------------------------------------------------------------------------------------------------------------------------------------------------------------------------------------------------------------------------------------------------------------------------------------------------------------------------------------------------------------------------------------------------------------------------------------------------------------------------------------------------------------------------------------------------------------------------------------------------------------------------------------------------------------------------------------------------------------------------------------------------------------------------------------------------------------------------------------------------------------------------------------------------------------------------------------------------------------------------------------------------------------------------------------------------------------------------------------------------------------------------------------------------------------------------------------------------------------------------------------------------------------------------------------------------------------------------------------------------------------------------------------------------------------------------------------------------------------------------------------------------------------------------------------------------------------------------------------------------------------------------------------------------------------------------------------------------------------------------------------------------------------------------------------------------------------------------------------------------------------------------------------------------------------------------------------------------------------------------------------------------------------------------------------------------------------------------------------------------------------------------------------------------------------------------------------------------------------------------|
|            |                       |                       | <p>16A1,GABPA,ZNF735,CHN1,GLP2R,LIMCH1,PAFAH1B1,EFEMP1,TM7SF3,DCAF1,ITGB8,STON2,VPS13D,NF2,CNKSR2,HIVEP1,CTNNA1,PPP1R9A,MOB3B,AKAP9,MEIS2,ERMP1,MRTFB,PRTG,RGL1,NR5A2,GRM1,FOXJ3,GABRG1,PCDH11Y,PPP2R5E,PLA2R1,AGO2,RIC8B,DYSF,ANK2,BRWD1,SYNE2,WNT9B,ZNF606,CLPX,DUSP16,SMARCA4,CDH11,FABP7,TNRC6C,SPG21,CXADR,ATRX,NUAK1,PTPN12,HDAC4,SLC1A1,PRKAA1,ITGB3BP,L3MBTL3,NFAT5,GUCY1A2,TOX3,CAMK4,BAZ2A,CPSF3,FGF10,ZC3HAV1,TGM1,INO80D,CLIP1,RASGRF1,ZNF675,SH3GL3,NXN,WNK2,ESRRG,FBN2,EGF,P2RX6,PDE3A,SCG5,MTMR3,TRIM5,RFC1,CLEC16A,STK38L,HTR2A,CYP4A11,DAZL,GTTF2F2,KREMEN1,TAF3,MARK2,GCSAML,EBF3,ZNF33B,FHL2,ADGRA3,CNIH3,IGF2BP3,ANKRD17,APBA2,SLC2A13,CDKN2C,EVC,GRK3,KNDC1,SPSB4,NOS2,STK10,GFRA2,RBBP8,EMILIN2,CCND3,ZIM3,CREM,MBP,TRPS1,TGFA,HIP1,GSR,ATP6V1E1,UTP4,CAPN5,RUFY2,NPHP4,PACSIN2,SNX3,NAA35,BRCA2,ZBTB2,ASB7,STRN,OR9Q1,ZNF121,PSG9,CDC42BPB,SOGA1,PTCD2,RALGAPA2,ZC3H14,RANBP9,RESF1,TMEM161A,PDE6C,LEMD3,HMGB1,FGF9,UST,CPAMD8,MDM1,ZNF567,ESRP1,ETS2,GEMIN5,DSYK,PLS1,NIN,SLAMF1,ETS1,FAM83B,SMARCC1,SNX6,SMOC2,ZFYVE26,ZNF431,MAP2,LAMC1,NEK10,ATF2,HIRA,CYLD,UMODL1,PSG6,ITGA9,KPNA1,RGMB,ZZEF1,DNAJC7,MYT1,MED27,SELENON,RB1CC1,ZNF541,ZBED9,JPH1,LALBA,PKP1,RACGAP1,NLRC5,ACO1,CNOT6L,FBLN5,SLC4A4,ZFP90,COPS8,ZNF124,ITSN2,SOX30,ZNF780B,CTSB,SUMO3,SLC15A2,PLEKHB2,BZW1,OVOL2,NTN1,RRAGD,BANP,HOXC13,CRACR2A,CASZ1,BMF,YTHDF3,DEDD2,COLQ,DDHD1,SUMO2,HS1BP3,ZNF292,PDE4DIP,POGK,ASH1L,HOXC4,ABCA4,UFD1,TOM1,PLPP4,CD9,CARD10,RALGPS2,ANAPC1,NDRG2,BMP5,HDGFL3,SERPINB9,GRB14,INO80,IGHV2-70D,CLNS1A,CNMD,KCNK5,DCUN1D4,MYCL,TNN,PSAP,MICALL2,PCNT,KDM6A,ATRN,IL33,GPRC5C,KL,RASGEF1C,CSDE1,LMX1A,IL10,OR1L6,SFPQ,RIOK1,DIRAS2,SKA1,LARP6,ITPRIP,MAP6,VASP,ETV6,PALMD,RAB12,RPS12,MORC2,SREBF2,THNSL2,HIPK1,CISD1,ZNF518A,DGKK,CD70,CENPE,LMX1B,NGDN,TWIST1,ALKAL2,RPF2,ZBTB38,ISX,PTGS1,CELSR2,FH,PCNA,UFL1,ADAMTS5,OR2T3,BRD4,SERBP1,NRBP1,ITGA6,ATP2B1,GAP43,IGHV1OR15-9,ADCY9,CNIH1,ZNF528,ZNF611,UBAP2,CIDEA,ARFGEF3,EXT2,MEOX2,SLC6A1,STAT1,BRMS1L,KCNJ18,PRAMEF2,IMPACT,PARK7,MED12L,UBL7,ADCYAP1R1,NCAPG2,MYOCD,EFHB,MEF2C,ZNF613,RBPM2,S100B,PRDM13,RAD51AP1,RAB38,DBF4B,NECTIN1,SPPL2B,ZBTB25,PASK,CWC22,ATP6V1B2,CXCL2,TOP1,EPHA4,GABRA5,NUMB,ZBTB10,MIR548H4,MEGF10,IL17RD,FBXO31,EXTL3,PRKAB1,MARK4,CDH5,NFKBID,ARHGAP12,CLDN18,APIP,CYFIP1,PCDH8,SEMA4D,SERPINB10,MC2R,FAT4,IMPA2,AKR1B1,C9,WNT5B,AMFR,NENF,SH2D1B,POMT2,ZNF845,OR4L1,SAMD13,ICA1,MTTP,TPTTE,PDCL3,SRP9,CNKSR1,CHCHD2,CDC45,OR11G2,BUB1,MYL12B,SDE2,RBMS3,UHRF2,HDAC2,SLF1,GON4L,TBX15,NCS1,ALB,MAPK9,CRTAM,APELA,GPR137B,SPTB,MIDEAS,FAIM,ZNF615,RNF138,NRIP1,ZNF738,SNRK,TM9SF2,STK36,RRAS2,GNA14,CD38,VMP1,GNAS,SERPINB7,DHX29,BMP7,TNFAIP8,RNF217,CNOT7,IL20RB,NSD1,EHMT1</p> |
| GO:0065007 | biological regulation | 0.0015309980797171415 | <p>FTO,BCAR3,LONP2,TRAPPC9,UNC80,MGA,PVT1,LRRRC4C,NOTCH2,ZNF236,MYO9A,TAF45,ULK2,MX2,RFX7,NLK,UNC13C,SVIL,CLTCL1,DLC1,TNRC6B,DPP10,ZDHC21,PTPRA,ITPR2,RDX,STXB1P,RALA,IL1RAPL2,BCL2,PRDM16,ALDH1A2,ARHGAP26,LRFN2,EPC2,ZEB</p>                                                                                                                                                                                                                                                                                                                                                                                                                                                                                                                                                                                                                                                                                                                                                                                                                                                                                                                                                                                                                                                                                                                                                                                                                                                                                                                                                                                                                                                                                                                                                                                                                                                                                                                                                                                                                                                                                                                                                                                                                                                                                                                                                                                                                                                                                                                                                                                                                                                               |

|  |  |  |                                                                                                                                                                                                                                                                                                                                                                                                                                                                                                                                                                                                                                                                                                                                                                                                                                                                                                                                                                                                                                                                                                                                                                                                                                                                                                                                                                                                                                                                                                                                                                                                                                                                                                                                                                                                                                                                                                                                                                                                                                                                                                                                                                                                                                                                                                                                                                                                                                                                                                                                                                                                                                                                                                                                                                                                                                                                                                                                                                                                                                                                                                                                                                                                                                                                                                                                                            |
|--|--|--|------------------------------------------------------------------------------------------------------------------------------------------------------------------------------------------------------------------------------------------------------------------------------------------------------------------------------------------------------------------------------------------------------------------------------------------------------------------------------------------------------------------------------------------------------------------------------------------------------------------------------------------------------------------------------------------------------------------------------------------------------------------------------------------------------------------------------------------------------------------------------------------------------------------------------------------------------------------------------------------------------------------------------------------------------------------------------------------------------------------------------------------------------------------------------------------------------------------------------------------------------------------------------------------------------------------------------------------------------------------------------------------------------------------------------------------------------------------------------------------------------------------------------------------------------------------------------------------------------------------------------------------------------------------------------------------------------------------------------------------------------------------------------------------------------------------------------------------------------------------------------------------------------------------------------------------------------------------------------------------------------------------------------------------------------------------------------------------------------------------------------------------------------------------------------------------------------------------------------------------------------------------------------------------------------------------------------------------------------------------------------------------------------------------------------------------------------------------------------------------------------------------------------------------------------------------------------------------------------------------------------------------------------------------------------------------------------------------------------------------------------------------------------------------------------------------------------------------------------------------------------------------------------------------------------------------------------------------------------------------------------------------------------------------------------------------------------------------------------------------------------------------------------------------------------------------------------------------------------------------------------------------------------------------------------------------------------------------------------------|
|  |  |  | <p> 1, AKR1C3, SDCCAG8, FGD4, SPRED1, MYO1E, PLPPR1, ALK, FOXJ2, CARMIL1, MCTP1, PAPPA2, RIN2, ANO6, ZNF880, EGLN3, MAP4, SPON1, APC, ZMYM4, ZNF595, HHLA2, TSHZ3, RBFOX3, PLPPR5, CRKL, ILDR2, SETD2, ARHGA P24, TNIK, SLC4A10, PTPRJ, ZNF280B, BACH1, RGS3, MTRF1, SND1, SCAI, BCL11A, FAM83F, TMEM182, SGMS1, GRIK3, CHSY1, FLI1, RPRD1A, ATP2B2, RXFP1, C5, ZFAND6, CYP2C9, FLT1, ZNF648, RFC3, RABEP1, ZNF382, TASP1, INVS, EDAR, CRACD, NUP214, CABLES1, PRKD1, TPTF2, CHRM3, PELI2, LRP2, FGF12, ONECUT1, TAFA4, BTBD11, SYN2, CCL28, SMYD3, HERC2, GRM7, SEPTIN9, RETREG1, TMEM117, THADA, SSBP3, RALGAPA1, CELF2, TBCD, NEDD4L, TRPM1, ZHX3, ABCB5, DCLK1, GABRG2, DOCK8, MAPRE2, ZNF600, NDUFAF2, CD2AP, ZNF723, PARN, HERPUD2, PTPRR, FIG4, PLGRKT, KCNE4, HIVEP2, ABCD2, ARNT, KCNK10, RANBP2, TRPC5, UBE2E2, NBN, TAF15, DIP2A, MSH6, ARHGAP32, RAB27B, HECW1, PHF19, MRFA, DUSP22, ZKSCAN5, SHC4, BRINP1, KCNJ1, HRH2, ITIH5, ADAM22, KMT2E, PCGF5, SYT10, PPP1R1C, ARHGEF17, MIR663AHG, ANKFY1, NCAM1, SLC16A1, GABPA, ZNF735, CHN1, GLP2R, LIMCH1, ECT2L, PAFAH1B1, EFEMP1, TM7SF3, DCAF1, ITGB8, STON2, VPS13D, NF2, CNKSR2, HIVEP1, CTNNA1, PPP1R9A, MOB3B, AKAP9, MEIS2, ERMP1, MRTFB, PRTG, RGL1, NR5A2, GRM1, FOXJ3, GABRG1, PCDH11Y, PPP2R5E, PLA2R1, AGO2, RIC8B, DYSF, ANK2, BRWD1, SYNE2, WNT9B, ZNF606, CLPX, DUSP16, SMARCA4, CDH11, FABP7, TNRC6C, SPG21, CXADR, ATRX, NUKA1, PTPN12, HDAC4, SLC1A1, PRKAA1, ITGB3BP, L3MBTL3, DMXL2, NFAT5, GUCY1A2, TOX3, CAMK4, BAZ2A, CP SF3, FGF10, ZC3HAV1, TGM1, INO80D, CLIP1, RASGRF1, PAH, ZNF675, SH3GL3, NXN, WNK2, ESRRG, FBN2, EGF, P2RX6, PDE3A, SCG5, MTMR3, TRIM5, RFC1, CLEC16A, STK38L, HTR2A, CYP4A11, DAZL, GTF2F2, PPP2R2C, KREMEN1, TAF3, MARK2, GCSAML, EBF3, ZNF33B, FHL2, ADGRA3, CNIH3, IGF2BP3, ANKRD17, APBA2, SLC2A13, CDKN2C, EVC, GRK3, KNDCC1, SPSB4, NOS2, STK10, GFRA2, RBBP8, TMTC2, EMILIN2, CCND3, ZIM3, CREM, MBP, TRPS1, TRAPPC11, TGFA, HIP1, GSR, ATP6V1E1, UTP4, CAPN5, RUFY2, NPHP4, PACSIN2, SNX3, NAA35, BRCA2, ZBTB2, ASB7, STRN, OR9Q1, ZNF121, PSG9, CDC42BPB, SOGA1, PTCDD2, RALGAPA2, ZC3H14, RANBP9, RESF1, TMEM161A, PDE6C, LEMD3, HMGB1, FGF9, UST, CPAMD8, MDM1, ZNF567, ESRP1, ETS2, UBAP2L, GEMIN5, DSTYK, PLS1, SLC39A6, NIN, SLAMF1, ETS1, FAM83B, SMARCC1, SNX6, SLC9A4, SMOC2, ZFYVE26, ZNF431, MAP2, PEX6, LAMC1, NEK10, ATF2, HIRA, CYLD, UMODL1, PSG6, ITGA9, KPN A1, RGM B, ZZE F1, DNAJC7, MYT1, MED27, SELENON, RB1CC1, ZNF541, ZBED9, JPH1, LALBA, PKP1, RACGAP1, NLRC5, ACO1, CNOT6L, FBLN5, SLC4A4, ZFP90, COPS8, ZNF124, ITSN2, SOX30, PPA2, ZNF780B, CTSB, SUMO3, SLC15A2, PLEKHB2, BZW1, OVOL2, NTN1, RRAGD, BANP, HOXC13, CRACR2A, CASZ1, BMF, YTHDF3, DEDD2, COLQ, DDHD1, SUMO2, HS1BP3, ZNF292, PDE4DIP, POGK, ASH1L, HOXC4, ABCA4, UFD1, TOM1, PLPP4, CD9, CARD10, RALGPS2, ANAPC1, NDRG2, BMP5, HDGFL3, SERPINB9, GRB14, INO80, IGHV2-70D, CLNS1A, CNMD, KCNK5, DCUN1D4, VSTM4, MYCL, TN N, PSAP, MICALL2, PCNT, KDM6A, ATRN, IL33, GPRC5C, PPP2R2A, KL, RASGEF1C, CSDE1, LMX1A, IL10, OR1L6, SFPQ, RIOK1, DIRAS2, SKA1, LARP6, ITPRIP, MAP6, VASP, ETV6, PALMD, RAB12, RPS12, MORC2, SREBF2, THNSL2, HIPK1, CISD1, ZNF518A, DGKK, CD70, CENPE, LMX1B, NGDN, TWIST1, ALKAL2, RPF2, ZBTB38, ISX, PTGS1, CELSR2, FH, PCNA, UFL1, ADAMTS5, OR2T3, BRD4, SERBP1, NRBP1, ITGA6, ATP2B1, GAP43, IARS2, IGHV10R15- </p> |
|--|--|--|------------------------------------------------------------------------------------------------------------------------------------------------------------------------------------------------------------------------------------------------------------------------------------------------------------------------------------------------------------------------------------------------------------------------------------------------------------------------------------------------------------------------------------------------------------------------------------------------------------------------------------------------------------------------------------------------------------------------------------------------------------------------------------------------------------------------------------------------------------------------------------------------------------------------------------------------------------------------------------------------------------------------------------------------------------------------------------------------------------------------------------------------------------------------------------------------------------------------------------------------------------------------------------------------------------------------------------------------------------------------------------------------------------------------------------------------------------------------------------------------------------------------------------------------------------------------------------------------------------------------------------------------------------------------------------------------------------------------------------------------------------------------------------------------------------------------------------------------------------------------------------------------------------------------------------------------------------------------------------------------------------------------------------------------------------------------------------------------------------------------------------------------------------------------------------------------------------------------------------------------------------------------------------------------------------------------------------------------------------------------------------------------------------------------------------------------------------------------------------------------------------------------------------------------------------------------------------------------------------------------------------------------------------------------------------------------------------------------------------------------------------------------------------------------------------------------------------------------------------------------------------------------------------------------------------------------------------------------------------------------------------------------------------------------------------------------------------------------------------------------------------------------------------------------------------------------------------------------------------------------------------------------------------------------------------------------------------------------------------|

|            |                                                      |                       |                                                                                                                                                                                                                                                                                                                                                                                                                                                                                                                                                                                                                                                                                                                                                                                                                                                                                                                                                                                                                                                                                                                                                             |
|------------|------------------------------------------------------|-----------------------|-------------------------------------------------------------------------------------------------------------------------------------------------------------------------------------------------------------------------------------------------------------------------------------------------------------------------------------------------------------------------------------------------------------------------------------------------------------------------------------------------------------------------------------------------------------------------------------------------------------------------------------------------------------------------------------------------------------------------------------------------------------------------------------------------------------------------------------------------------------------------------------------------------------------------------------------------------------------------------------------------------------------------------------------------------------------------------------------------------------------------------------------------------------|
|            |                                                      |                       | 9, AGAP9, ADCY9, CNIH1, ZNF528, ZNF611, UBAP2, CIDEA, ARFGEF3, EXT2, MEOX2, SLC6A1, STAT1, BRMS1L, KCN18, PRAMEF2, IMPACT, PARK7, MED12L, UBL7, ADCYAP1R1, PLA2G12B, NCAPG2, MYOCD, EFHB, MEF2C, ZNF613, RBPMS2, S100B, PRDM13, RAD51AP1, RAB38, DBF4B, NECTIN1, SPPL2B, ZBTB25, PASK, CWC22, TRIM23, ATP6V1B2, CXCL2, TOP1, EPHA4, GABRA5, ACSM2A, NUMB, FRRS1, ZBTB10, MIR548H4, MEGF10, IL17RD, FBXO31, EXTL3, PRKAB1, MARK4, CDH5, NFKBID, ARHGAP12, CLDN18, APIP, CYFIP1, PCDH8, SEMA4D, SERPINB10, MC2R, FAT4, IMPA2, AKR1B1, C9, WNT5B, AMFR, NENF, SH2D1B, POMT2, ZNF845, OR4L1, SAMD13, ICA1, MTPP, TPTE, PDCL3, SRP9, CNKSR1, CHCHD2, HKDC1, CDC45, OR11G2, BUB1, MYL12B, SDE2, RBMS3, UHRF2, HDAC2, SLF1, GON4L, TBX15, NCS1, ALB, MAPK9, CRTAM, APELA, POTEJ, GPR137B, SPTB, MIDEAS, FAIM, ZNF615, RNF138, NRIP1, ZNF738, SNRK, ARFGAP3, TM9SF2, STK36, MB, RRAS2, GNA14, CD38, VMP1, GNAS, SERPINB7, DHX29, BMP7, TNFAIP8, RNF217, TRAPPC6B, CNOT7, IL20RB, NSD1, EMT1                                                                                                                                                                         |
| GO:0035556 | intracellular signal transduction                    | 0.0022717952454322466 | BCAR3, NOTCH2, MYO9A, NLK, DLC1, ITPR2, RDX, RALA, BCL2, ARHGAP26, AKR1C3, FGD4, SPRED1, ALK, MCTP1, RIN2, APC, CRKL, ARHGAP24, TNIK, PTPRJ, SCAI, SGMS1, ZFAND6, FLT1, EDAR, PRKD1, TPTE2, CHRM3, PELI2, LRP2, FGF12, TMEM117, RALGAP1, DCLK1, DOCK8, MAPRE2, CD2AP, PTPRR, NBN, MSH6, ARHGAP32, DUSP22, SHC4, PPP1R1C, ARHGEF17, CHN1, PAFAH1B1, NF2, CNKSR2, PPP1R9A, MOB3B, RGL1, NR5A2, GRM1, PLA2R1, ANK2, DUSP16, ATRX, NUA1, HDAC4, PRKAA1, NFAT5, GUCY1A2, CAMK4, FGF10, ZC3HAV1, RASGRF1, ZNF675, WNK2, EGF, PDE3A, TRIM5, CLEC16A, STK38L, HTR2A, MARK2, FHL2, ANKRD17, KNDC1, SPSB4, NOS2, RBBP8, MBP, TGFAR, HIP1, BRCA2, ASB7, RALGAP2, RANBP9, TMEM161A, LEMD3, HMGB1, DSTYK, SLAMF1, NEK10, ATF2, CYLD, RB1CC1, RACGAP1, NLRC5, COPS8, SLC15A2, NTN1, RRAGD, CRACR2A, DEDD2, ASH1L, UFD1, CARD10, RALGPS2, NDRG2, KL, RASGEF1C, SFPQ, RAB12, HIPK1, DGKK, TWIST1, ALKAL2, RPF2, UFL1, BRD4, NRBP1, ADCY9, ARFGEF3, STAT1, PARK7, ADCYAP1R1, EFHB, MEF2C, S100B, RAB38, PASK, EPHA4, FBXO31, MARK4, ARHGAP12, APIP, CYFIP1, SEMA4D, FAT4, NENF, TPTE, CNKSR1, CDC45, BUB1, SDE2, MAPK9, APELA, GPR137B, FAIM, SNRK, STK36, RRAS2, GNAS, BMP7 |
| GO:0120036 | plasma membrane bounded cell projection organization | 0.0023972948055687344 | LRRC4C, NOTCH2, MYO9A, ULK2, RDX, STXBP1, RALA, BCL2, SDCCAG8, FGD4, ALK, CARMIL1, ANO6, MAP4, APC, PLPPR5, CRKL, ARHGAP24, TNIK, BCL11A, CECR2, PRKD1, LRP2, ONECUT1, GRM7, SEPTIN9, NEDD4L, DCLK1, CD2AP, TTC29, FIG4, ABCD2, TRPC5, DIP2A, HECW1, FRYL, NCAM1, CHN1, PAFAH1B1, CTNNA1, PPP1R9A, PRTG, SYNE2, AIF1L, CDH11, HDAC4, CRTAC1, RASGRF1, IFT43, ABCC4, KREMEN1, MARK2, KNDC1, MBP, SNX3, STRN, HMGB1, NUDCD3, UST, PLS1, NIN, MAP2, CYLD, KIAA0753, ITSN2, NTN1, BMP5, HDGFL3, TNN, MICALL2, PCNT, LMX1A, TTC39C, MAP6, VASP, ALKAL2, CELSR2, ITGA6, GAP43, GRXCR1, IMPACT, MEF2C, S100B, NECTIN1, DRC7, EPHA4, EMP1, RSPH1, NUMB, FBXO31, MARK4, CYFIP1, HOATZ, SEMA4D, FAT4, SPAG6, HDAC2, NCS1, STK36, CD38, BMP7                                                                                                                                                                                                                                                                                                                                                                                                                           |
| GO:0031175 | neuron projection development                        | 0.0027517124780565587 | LRRC4C, NOTCH2, MYO9A, ULK2, STXBP1, BCL2, ALK, MAP4, PLPPR5, CRKL, TNIK, BCL11A, CECR2, PRKD1, LRP2, GRM7, NEDD4L, DCLK1, FIG4, TRPC5, DIP2A, HECW1, FRYL, NCAM1, CHN1, PAFAH1B1, CTNNA1, PPP1R9A, PRTG, CDH11, CRTAC1, RASGRF1, KREMEN1, MARK2, KNDC1, MBP, SNX3, STRN, HMGB1, UST, PLS1, NIN, MAP2, ITSN2, NTN1, BMP5, HDGFL3, TNN, MICALL2, LMX1A, MAP6, VASP, ALKAL2, CELSR2, ITGA6, GAP43, GRXCR1, IMPACT, M                                                                                                                                                                                                                                                                                                                                                                                                                                                                                                                                                                                                                                                                                                                                          |

|            |                                  |                       |                                                                                                                                                                                                                                                                                                                                                                                                                                                                                                                                                                                                                                                                                                                                                                                                                                                                                                                                                                                                                                                                                                                                                                                                                                                                                                                                                                                                                                                                                                                      |
|------------|----------------------------------|-----------------------|----------------------------------------------------------------------------------------------------------------------------------------------------------------------------------------------------------------------------------------------------------------------------------------------------------------------------------------------------------------------------------------------------------------------------------------------------------------------------------------------------------------------------------------------------------------------------------------------------------------------------------------------------------------------------------------------------------------------------------------------------------------------------------------------------------------------------------------------------------------------------------------------------------------------------------------------------------------------------------------------------------------------------------------------------------------------------------------------------------------------------------------------------------------------------------------------------------------------------------------------------------------------------------------------------------------------------------------------------------------------------------------------------------------------------------------------------------------------------------------------------------------------|
|            |                                  |                       | <i>EF2C, S100B, NECTIN1, EPHA4, NUMB, FBXO31, CYFIP1, SEMA4D, FAT4, SPAG6, HDAC2, NCS1, CD38, BMP7</i>                                                                                                                                                                                                                                                                                                                                                                                                                                                                                                                                                                                                                                                                                                                                                                                                                                                                                                                                                                                                                                                                                                                                                                                                                                                                                                                                                                                                               |
| GO:0022008 | neurogenesis                     | 0.0037587736091569818 | <i>TRAPPC9, LRRC4C, NOTCH2, MYO9A, ULK2, STXBP1, BCL2, ALDH1A2, ZEB1, SDCCAG8, ALK, MAP4, PLPPR5, CRKL, TNIK, SLC4A10, BCL11A, CECR2, ATP2B2, PRKD1, LRP2, GRM7, TBCD, NEDD4L, DCLK1, FIG4, TRPC5, DIP2A, HECW1, FRYL, BRINP1, ADAM22, NCAM1, CHN1, PAFAH1B1, NF2, CTNNA1, PPP1R9A, PRTG, SYNE2, WNT9B, CDH11, SLC1A1, CRTAC1, FGF10, RASGRF1, SH3GL3, KREMEN1, MARK2, CDKN2C, KNDC1, MBP, NPHP4, SNX3, STRN, PDE6C, HMGB1, UST, ESRP1, PLS1, NIN, MAP2, RACGAP1, ITSN2, NTN1, CASZ1, HDAC11, CD9, DZANK1, BMP5, HDGFL3, MYCL, TNN, MICALL2, IL33, LMX1A, MAP6, VASP, ETV6, HIPK1, LMX1B, TWIST1, ALKAL2, CELSR2, UFL1, ITGA6, GAP43, GRXCR1, IMPACT, MEF2C, S100B, PRDM13, NECTIN1, EPHA4, GABRA5, NUMB, FBXO31, HS6ST1, CYFIP1, SEMA4D, FAT4, WNT5B, SPAG6, HDAC2, NCS1, FAIM, RAS2, CD38, BMP7</i>                                                                                                                                                                                                                                                                                                                                                                                                                                                                                                                                                                                                                                                                                                                |
| GO:0030030 | cell projection organization     | 0.004532180213776525  | <i>LRRC4C, NOTCH2, MYO9A, ULK2, RDX, STXBP1, RALA, BCL2, SDCCAG8, FGD4, ALK, CARMIL1, ANO6, MAP4, APC, PLPPR5, CRKL, ARHGAP24, TNIK, BCL11A, CECR2, PRKD1, LRP2, ONECUT1, GRM7, SEPTIN9, NEDD4L, DCLK1, CD2AP, TTC29, FIG4, ABCD2, TRPC5, DIP2A, HECW1, FRYL, NCAM1, CHN1, PAFAH1B1, CTNNA1, PPP1R9A, PRTG, SYN E2, AIF1L, CDH11, HDAC4, CRTAC1, RASGRF1, IFT43, ABCC4, KREMEN1, MARK2, KNDC1, MBP, PACSIN2, SNX3, STRN, HMGB1, NUDCD3, UST, PLS1, NIN, MAP2, CYLD, KIAA0753, ITSN2, NTN1, BMP5, HDGFL3, TNN, MICALL2, PCNT, LMX1A, TTC39C, MAP6, VASP, ALKAL2, CELSR2, ITGA6, GAP43, GRXCR1, IMPACT, MEF2C, S100B, NECTIN1, DRC7, EPHA4, EMP1, RSPH1, NUMB, FBXO31, MARK4, CYFIP1, HOATZ, SEMA4D, FAT4, SPAG6, HDAC2, NCS1, STK36, CD38, BMP7</i>                                                                                                                                                                                                                                                                                                                                                                                                                                                                                                                                                                                                                                                                                                                                                                   |
| GO:0001842 | neural fold formation            | 0.005849283988301977  | <i>CECR2, LUZP1, OVOL2, BMP5, BMP7</i>                                                                                                                                                                                                                                                                                                                                                                                                                                                                                                                                                                                                                                                                                                                                                                                                                                                                                                                                                                                                                                                                                                                                                                                                                                                                                                                                                                                                                                                                               |
| GO:0032501 | multicellular organismal process | 0.006079506390014592  | <i>FTO, BCAR3, TRAPPC9, LRRC4C, NOTCH2, IMMP2L, SCAPER, FREM1, MYO9A, TAF5, ULK2, DLC1, ZDHHC21, STXB P1, RALA, IL1RAPL2, BCL2, PRDM16, ALDH1A2, ARHGAP26, ZEB1, AKR1C3, SDCCAG8, SPRED1, MYO1E, PLPPR1, ALK, FOXJ2, PAPP A2, RIN2, ANO6, MAP4, APC, HHLA2, TSHZ3, RBFOX3, PLPPR5, CRKL, ILDR2, SETD2, ARHGAP24, TNIK, SLC4A10, PTPRJ, MYOF, SND1, BCL11A, CECR2, CHSY1, FLI1, ATP2B2, RXFP1, C5, FLT1, EDAR, CRACD, CABLES1, PRKD1, CHRM3, LRP2, FGF12, ONECUT1, TAF A4, HERC2, GRM7, RETREG1, LUZP1, SSBP3, CELF2, TBCD, NEDD4L, TRPM1, ZHX3, ABCB5, DCLK1, GABRG2, MAPR E2, CD2AP, PARN, HERPUD2, PTPRR, FIG4, CMIP, LOXHD1, KCNE4, ABCD2, THSD7A, ARNT, KCNK10, TRPC5, NBN, RBM47, CALD1, SNTG2, DIP2A, MSH6, COL27A1, HECW1, PHF19, ESS2, FRYL, BRINP1, HRH2, ADAM22, CRISPLD2, KMT2E, SYT10, NCAM1, SLC16A1, GABPA, LCE1F, CHN1, ACSBG1, PAFAH1B1, EFEMP1, TLL1, DCAF1, ITGB8, NF2, CTNNA1, PPP1R9A, AKAP9, MEIS2, MRTFB, PRTG, NR5A2, GRM1, FOXJ3, GABRG1, PCDH11Y, PLA2R1, AGO2, ANK2, SYNE2, WNT9B, ANKS6, SMARCA4, CDH11, FABP7, CXADR, ATRX, HDAC4, SLC1A1, PRKAA1, CRTAC1, L3MBTL3, CAMK4, FGF10, ZC3HAV1, TGM1, INO80D, RASGRF1, SYNE1, ZNF675, SH3GL3, NXN, ESRRG, FBN2, EGF, P2RX6, PDE3A, ADAMTS2, PKHD1L1, ABCC4, HTR2A, CYP4A11, DAZL, KREMEN1, MARK2, FHL2, IGF2BP3, ANKRD17, APBA2, SLC2A13, CDKN2C, EVC, KNDC1, NOS2, GFRA2, RBBP8, EMILIN2, MYOM2, CREM, MBP, TRPS1, TGFA, NPHP4, MTHFD1L, SNX3, BRCA2, CFAP97, STRN, OR9Q1, PSG9, PTC D2, PDE6C, HMGB1, FGF9, UST, CPAMD8, MDM1, ESRP1, E</i> |

|            |                     |                      |                                                                                                                                                                                                                                                                                                                                                                                                                                                                                                                                                                                                                                                                                                                                                                                                                                                                                                                                                                                                                                                                                                                                                                                                                                                                                                                                                                               |
|------------|---------------------|----------------------|-------------------------------------------------------------------------------------------------------------------------------------------------------------------------------------------------------------------------------------------------------------------------------------------------------------------------------------------------------------------------------------------------------------------------------------------------------------------------------------------------------------------------------------------------------------------------------------------------------------------------------------------------------------------------------------------------------------------------------------------------------------------------------------------------------------------------------------------------------------------------------------------------------------------------------------------------------------------------------------------------------------------------------------------------------------------------------------------------------------------------------------------------------------------------------------------------------------------------------------------------------------------------------------------------------------------------------------------------------------------------------|
|            |                     |                      | <p>TS2,PLS1,NIN,SLAMF1,ETS1,SMARCC1,SLC9A4,SMO C2,MAP2,LAMC1,NEK10,RRBP1,TDRD5,ATF2,HIRA,C YLD,UMODL1,PSG6,MYT1,MED27,SELENON,RB1CC1,Z NF541,SMPX,RACGAP1,ACO1,DMC1,SLC4A4,CATSPER G,ITSN2,SOX30,SYBU,SEC24D,CTSB,SLC15A2,OVOL 2,NTN1,HOXC13,CRACR2A,CASZ1,YTHDF3,COLQ,HDA C11,ASH1L,HOXC4,ABCA4,UFD1,PLPP4,CD9,CARD10 ,DZANK1,NDRG2,BMP5,HDGFL3,INO80,CNMD,VSTM4, MYCL,TNN,PSAP,MICALL2,KDM6A,ATRN,IL33,KL,CS DE1,LMX1A,IL10,OR1L6,TTC39C,MAP6,VASP,ETV6, HIPK1,DGKK,CACYBP,LMX1B,TWIST1,ALKAL2,ISX,P TGS1,CELSR2,FH,PCNA,UFL1,ADAMTS5,OR2T3,SMTN ,SMPD4,ITGA6,ATP2B1,GAP43,ADCY9,CIDEA,EXT2, MEOX2,SLC6A1,GRXCR1,STAT1,BRMS1L,SHROOM2,AR MC6,IMPACT,PARK7,ADCYAP1R1,NCAPG2,MYOCD,MEF 2C,RBPMS2,S100B,PRDM13,NECTIN1,PASK,DRC7,TO P1,LCE3D,EPHA4,GABRA5,RSPH1,NUMB,IL17RD,FBX O31,PRKAB1,HS6ST1,MARK4,CDH5,APOL2,NFKBID,C LDN18,CYFIP1,HOAT2,PCDH8,SEMA4D,FAT4,AKR1B1 ,WNT5B,AMFR,SLC26A2,OR4L1,SANBR,MTTP,DPY19L 2,PDCL3,SPAG6,OR11G2,NLRP14,UNC45B,HDAC2,GO N4L,TBX15,NCS1,ATP5PF,ALB,CRTAM,APELA,POTEJ ,GPR137B,FAIM,NRIP1,SNRK,STK36,MB,RRAS2,CD3 8,VMP1,GNAS,SERPINB7,BMP7,TRAPPC6B,IL20RB,E HMT1</p>                                                                                                                                                                                                                                                                   |
| GO:0048666 | neuron developmen t | 0.006280170127881384 | <p>LRRC4C,NOTCH2,MYO9A,ULK2,STXBP1,BCL2,ALK,MA P4,PLPPR5,CRKL,TNIN,SLC4A10,BCL11A,CECR2,PR KD1,LRP2,GRM7,TBCD,NEDD4L,DCLK1,FIG4,TRPC5, DIP2A,HECW1,FRYL,NCAM1,CHN1,PAFAH1B1,CTNNA1 ,PPP1R9A,PRTG,CDH11,CRTAC1,RASGRF1,KREMEN1, MARK2,KNDC1,MBP,NPHP4,SNX3,STRN,PDE6C,HMGB1 ,UST,PLS1,NIN,MAP2,ITSN2,NTN1,DZANK1,BMP5,H DGFL3,TNN,MICALL2,LMX1A,MAP6,VASP,ALKAL2,CE LSR2,ITGA6,GAP43,GRXCR1,IMPACT,MEF2C,S100B, NECTIN1,EPHA4,GABRA5,NUMB,FBXO31,HS6ST1,CYF IP1,SEMA4D,FAT4,SPAG6,HDAC2,NCS1,CD38,BMP7</p>                                                                                                                                                                                                                                                                                                                                                                                                                                                                                                                                                                                                                                                                                                                                                                                                                                                                     |
| GO:0007154 | cell communicat ion | 0.010208411590548052 | <p>BCAR3,LRRC4C,NOTCH2,FREM1,MYO9A,TAF4A,ULK2, NLK,UNC13C,DLC1,ZDHHC21,PTPRA,ITPR2,RDX,STX BP1,RALA,IL1RAPL2,BCL2,PRDM16,ALDH1A2,ARHGA P26,LRFN2,ZEB1,AKRIC3,FGD4,SPRED1,MYO1E,PLP PR1,ALK,MCTP1,RIN2,ANO6,APC,HHLA2,TSHZ3,PLP PR5,CRKL,ILDR2,ARHGAP24,TNIN,SLC4A10,PTPRJ, RGS3,SCAI,FAM83F,SGMS1,GRIK3,CHSY1,RXFP1,C5 ,ZFAND6,FLT1,RABEP1,INVS,EDAR,PRKD1,TPTE2,C HRM3,PELI2,LRP2,FGF12,ONECUT1,TAF4A,BTBD11, SYN2,CCL28,GRM7,TMEM117,RALGAPA1,TRPM1,DCLK 1,GABRG2,DOCK8,MAPRE2,NDUFAF2,CD2AP,HERPUD2 ,PTPRR,ARNT,KCNK10,NBN,MSH6,ARHGAP32,HECW1, DUSP22,SV2B,SHC4,HRH2,SYT10,PPP1R1C,ARHGEF1 7,NCAM1,SLC16A1,CHN1,GLP2R,PAFAH1B1,EFEMP1, TM7SF3,ITGB8,NF2,CNKS2,HIVEP1,CTNNA1,PPP1R 9A,MOB3B,AKAP9,ERMP1,RGL1,NR5A2,GRM1,GABRG1 ,PCDH11Y,PPP2R5E,PLA2R1,RIC8B,ANK2,WNT9B,DU SP16,SMARCA4,CDH11,SPG21,CXADR,ATRX,NUAK1,P TPN12,HDAC4,SLC1A1,PRKAA1,ITGB3BP,RIMBP2,NF AT5,GUCY1A2,CAMK4,FGF10,ZC3HAV1,RASGRF1,ZNF 675,SH3GL3,NXN,WNK2,ESRRG,FBN2,EGF,P2RX6,PD E3A,SCG5,MTMR3,TRIM5,CLEC16A,STK38L,ABCC4,H TR2A,KREMEN1,MARK2,GCSAML,FHL2,ADGRA3,CNIH3 ,ANKRD17,APBA2,EVC,GRK3,KNDC1,SPSB4,NOS2,GF RA2,RBBP8,CCND3,CREM,MBP,TGFA,HIP1,CAPN5,NP HP4,PACSIN2,SNX3,BRCA2,ASB7,STRN,OR9Q1,PSG9 ,CDC42BPB,SOGA1,RALGAPA2,RANBP9,TMEM161A,PD E6C,LEMD3,HMGB1,FGF9,DSTYK,SLAMF1,FAM83B,SM ARCC1,SNX6,SMOC2,LAMC1,NEK10,ATF2,CYLD,PSG6 ,ITGA9,KPNA1,RGMB,ZZEF1,RB1CC1,LALBA,PKP1,R</p> |

|            |                               |                      |                                                                                                                                                                                                                                                                                                                                                                                                                                                                                                                                                                                                                                                                                                                                                                                                                                                                                                                                                                                                                                                                                                                                                                                                                                                                                                                                                                                                                                                                                                                             |
|------------|-------------------------------|----------------------|-----------------------------------------------------------------------------------------------------------------------------------------------------------------------------------------------------------------------------------------------------------------------------------------------------------------------------------------------------------------------------------------------------------------------------------------------------------------------------------------------------------------------------------------------------------------------------------------------------------------------------------------------------------------------------------------------------------------------------------------------------------------------------------------------------------------------------------------------------------------------------------------------------------------------------------------------------------------------------------------------------------------------------------------------------------------------------------------------------------------------------------------------------------------------------------------------------------------------------------------------------------------------------------------------------------------------------------------------------------------------------------------------------------------------------------------------------------------------------------------------------------------------------|
|            |                               |                      | <p>ACGAP1,NLRC5,COPS8,SOX30,SLC15A2,OVOL2,NTN1,CHKA,RRAGD,CRACR2A,BMF,YTHDF3,DEDD2,COLQ,ASH1L,ABCA4,UFD1,TOM1,PLPP4,CARD10,RALGPS2,NDRG2,BMP5,HDGFL3,GRB14,IGHV2-70D,TNN,PSAP,PCNT,IL33,GPRC5C,KL,RASGEF1C,IL10,OR1L6,SFPQ,DIRAS2,ITPRIP,RAB12,RPS12,SREBF2,THNSL2,HIPK1,DGKK,CD70,TWIST1,ALKAL2,RPF2,CELSR2,UFL1,OR2T3,BRD4,NRBP1,ITGA6,ATP2B1,GAP43,IGHV10R15-9,ADCY9,CNIH1,CIDEA,ARFGEF3,EXT2,SLC6A1,STAT1,BRMS1L,IMPACT,PARK7,ADCYAP1R1,NCAPG2,MYOCD,EHFB,MEF2C,RBPMS2,S100B,RAB38,SPPL2B,PASK,CXCL2,EPHA4,GABRA5,IL17RD,FBXO31,PRKAB1,MARK4,CDH5,NFKBID,ARHGAP12,CLDN18,APIP,CYFIP1,PCDH8,SEMA4D,MC2R,FAT4,IMPA2,WNT5B,AMFR,NENF,ZFYVE1,OR4L1,ICA1,TPTE,CNKSR1,CDC45,OR1IG2,BUB1,SDE2,RBMS3,HDAC2,ALB,MAPK9,APELA,GPR137B,FAIM,RNF138,SNRK,STK36,RRAS2,GNA14,CD38,GNAS,BMP7,CNOT7,IL20RB</p>                                                                                                                                                                                                                                                                                                                                                                                                                                                                                                                                                                                                                                                                                                                           |
| GO:0030182 | neuron differentiation        | 0.013150209196540513 | <p>TRAPPC9,LRRRC4C,NOTCH2,MYO9A,ULK2,STXBP1,BCL2,ALDH1A2,ZEB1,ALK,MAP4,PLPPR5,CRKL,TNIN,SLC4A10,BCL11A,CECR2,ATP2B2,PRKD1,LRP2,GRM7,TBCD,NEDD4L,DCLK1,FIG4,TRPC5,DIP2A,HECW1,FRYL,BRINP1,NCAM1,CHN1,PAFAH1B1,CTNNA1,PPP1R9A,PRTG,WNT9B,CDH11,CRTAC1,RASGRF1,SH3GL3,KREMEN1,MARK2,KNDC1,MBP,NPHP4,SNX3,STRN,PDE6C,HMGB1,UST,ESRP1,PLS1,NIN,MAP2,ITSN2,NTN1,CASZ1,DZANK1,BMP5,HDGFL3,MYCL,TNN,MICALL2,LMX1A,MAP6,VASP,HIPK1,LMX1B,ALKAL2,CELSR2,ITGA6,GAP43,GRXCR1,IMPACT,MEF2C,S100B,NECTIN1,EPHA4,GABRA5,NUMB,FBXO31,HS6ST1,CYFIP1,SEMA4D,FAT4,WNT5B,SPAG6,HDAC2,NCS1,CD38,BMP7</p>                                                                                                                                                                                                                                                                                                                                                                                                                                                                                                                                                                                                                                                                                                                                                                                                                                                                                                                                         |
| GO:0051716 | cellular response to stimulus | 0.013168107819126317 | <p>FTO,BCAR3,NOTCH2,IMMP2L,ZNF236,MYO9A,TAF45,ULK2,NLK,DLC1,ZDHHC21,PTPRA,ITPR2,RDX,STXBP1,RALA,IL1RAPL2,BCL2,MYO5A,PRDM16,ALDH1A2,ARHGAP26,EPC2,ZEB1,AKR1C3,FGD4,SPRED1,MYO1E,PLPPR1,ALK,MCTP1,ERCC6L2,RIN2,ANO6,EGLN3,APC,HHLA2,PLPPR5,CRKL,SETD2,ARHGAP24,TNIN,PTPRJ,BACH1,RGS3,SCAT,BCL11A,FAM83F,SGMS1,GRIK3,CHSY1,RXFP1,C5,ZFAND6,CYP2C9,FLT1,RFC3,RA-BEP1,INVS,EDAR,PRKD1,TPTE2,CHRM3,ADSS2,PELI2,LRP2,FGF12,ONECUT1,TAF44,BTBD11,CCL28,SMYD3,HERC2,GRM7,TMEM117,RALGAP1,TRPM1,DCLK1,GABRG2,DOCK8,MAPRE2,NDUFAF2,CD2AP,HERPUD2,PTPRR,ECPAS,ARNT,KCNK10,UBE2E2,NBN,MSH6,ARHGAP32,HECW1,DUSP22,SEM1,SHC4,BRINP1,HRH2,SYT10,PPP1R1C,ARHGEF17,NCAM1,SLC16A1,GABPA,CHN1,GLP2R,PAFAH1B1,EFEMP1,TM7SF3,ITGB8,NF2,CNKSR2,HIVEP1,CTNNA1,PPP1R9A,MOB3B,AKAP9,ERMP1,RGL1,NR5A2,GRM1,GABRG1,PCDH11Y,PPP2R5E,PLA2R1,ACSM2B,WDHD1,RIC8B,ANK2,WNT9B,DUSP16,SMARCA4,EFTUD2,SPG21,CXADR,ATRX,NUAK1,PTPN12,HDAC4,SLC1A1,PRKAA1,ITGB3BP,NFAT5,GUCY1A2,CAMK4,FGF10,ZC3HAV1,INO80D,RASGRF1,ZNF675,SH3GL3,NXN,WNK2,ESRRG,FBN2,EGF,P2RX6,PDE3A,SCG5,MTMR3,TRIM5,RFC1,CLEC16A,STK38L,ABCC4,HTR2A,KREMEN1,MARK2,GCSAML,FHL2,ADGRA3,CNIH3,ANKRD17,EVC,GRK3,KNDC1,SPSB4,NOS2,GFRA2,RBP8,GBP6,CCND3,CREM,MBP,TGFA,HIP1,GSR,CAPN5,NPHP4,SNX3,BRCA2,ASB7,STRN,OR9Q1,PSG9,CDC42BPB,SOGA1,RALGAP2,RANBP9,TMEM161A,PDE6C,LEMD3,HMGB1,FGF9,DSTYK,SLAMF1,FAM83B,SMARCC1,SNX6,SMOC2,ZFYVE26,LAMC1,NEK10,ATF2,CYLD,UMODL1,PSG6,ITGA9,KPNA1,RGMB,DNAJC7,CHAF1A,SELENON,RB1CC1,USP43,LALBA,PKP1,RACGAP1,NLRC5,DMC1,FBLN5,COPS8,SOX30,CTSB,SLC15A2,OVOL2</p> |

|            |                        |                      |                                                                                                                                                                                                                                                                                                                                                                                                                                                                                                                                                                                                                                                                                                                                                                                                                                                                                                                                                                                                                                                                                                                                                                                                                                                                                              |
|------------|------------------------|----------------------|----------------------------------------------------------------------------------------------------------------------------------------------------------------------------------------------------------------------------------------------------------------------------------------------------------------------------------------------------------------------------------------------------------------------------------------------------------------------------------------------------------------------------------------------------------------------------------------------------------------------------------------------------------------------------------------------------------------------------------------------------------------------------------------------------------------------------------------------------------------------------------------------------------------------------------------------------------------------------------------------------------------------------------------------------------------------------------------------------------------------------------------------------------------------------------------------------------------------------------------------------------------------------------------------|
|            |                        |                      | <p>,NTN1,CHKA,RRAGD,CRACR2A,BMF,YTHDF3,DEDD2,ASH1L,ABCA4,UFD1,TOM1,PLPP4,CD9,CARD10,RALGPS2,NDRG2,BMP5,PWWP3A,HDGFL3,SERPINB9,GRB14,INO80,IGHV2-70D,TNN,PSAP,PCNT,IL33,GPRC5C,KL,RASGEF1C,IL10,OR1L6,SFPQ,DIRAS2,ITPRIP,RAB12,RPS12,MORC2,SREBF2,THNSL2,HIPK1,DGKK,CD70,CACYBP,TWIST1,ALKAL2,RPF2,ZBTB38,PTGS1,CELSR2,FH,TDP1,PCNA,UFL1,OR2T3,BRD4,SMPD4,NRBP1,ITGA6,ATP2B1,GAP43,IGHV10R15-9,ADCY9,CNIH1,CIDEA,ARFGEF3,EXT2,STAT1,BRMS1L,SHROOM2,IMPACT,PARK7,UBL7,ADCYAP1R1,NCAPG2,MYOCD,EFHB,MEF2C,RBPMS2,S100B,RAD51AP1,RAB38,SPPL2B,PASK,CXCL2,EPHA4,GABRA5,IL17RD,FBXO31,PRKAB1,MARK4,CDH5,TPH2,NFKBID,ARHGAP12,CLDN18,APIP,CYFIP1,SEMA4D,MC2R,FAT4,IMP2,AKR1B1,WNT5B,AMFR,NENF,ZFYVE1,OR4L1,TPTE,CNKSR1,CHCHD2,CDC45,OR11G2,BUB1,SDE2,RBMS3,HDAC2,SLF1,ALB,MAPK9,APELA,GPR137B,GBP4,FAIM,FAAP24,RNF138,NRIP1,SNRK,STK36,RRAS2,GNAI4,CD38,GNAS,BMP7,CNOT7,IL20RB</p>                                                                                                                                                                                                                                                                                                                                                                                                                   |
| GO:0006996 | organelle organization | 0.015656980782319543 | <p>LONP2,TRAPPC9,NOTCH2,IMMP2L,ULK2,UNC13C,SVIL,MICAL3,NUBPL,DLC1,RDX,STXBP1,RALA,BCL2,MYO5A,ARHGAP26,SDCCAG8,FGD4,MYO1E,CEP192,MICOS10,FOXJ2,CARMIL1,MAP4,APC,ZMYM4,SETD2,TNIIK,GNPTAB,CECR2,ZFAND6,RFC3,CRACD,PRKD1,ONECUT1,SEPTIN9,RETREG1,TBCD,DCLK1,MAPRE2,NDUFAF2,CD2AP,PARN,TTC29,FIG4,FRMD3,ABCD2,THSD7A,NBN,CALD1,MRTFA,ARHGEF17,ANKFY1,SLC16A1,LIMCH1,PAFAH1B1,VPS13D,NF2,CTNNA1,PPP1R9A,AKAP9,FOXJ3,DYSF,ANK2,STAG2,BRWD1,SYNE2,AIF1L,SHOC1,SMARCA4,CXADR,ATRX,PRKAA1,ITGB3BP,BAZ2A,FGF10,UQCC1,INO80D,CLIP1,SYNE1,EGF,PDE3A,IFT43,MTMR3,RFC1,CLEC16A,ABCC4,GTTF2F2,MARK2,MYOM2,TRAPPC11,TGFA,HIP1,NPHP4,PACSIN2,SNX3,BRCA2,CDC42BPB,PTCD2,RANBP9,RESF1,LEMD3,HMGB1,NUDCD3,CDS2,MDM1,UBAP2L,PLS1,NIN,SLAMF1,ETS1,SMARCC1,ZFYVE26,MAP2,PEX6,TDRD5,ATF2,NDUFAF6,CYLD,GOLGA6B,KIAA0753,CEP44,GOLGA6D,SELENON,RB1CC1,PKP1,RACGAP1,CNOT6L,DMC1,GOLGA6C,SOX30,PTGFRN,SEC24D,CHKA,BMF,YTHDF3,DDHD1,PDE4DIP,ESYT2,ANAPC1,HDGFL3,INO80,MICALL2,PCNT,CSDE1,SFPQ,TTC39C,TOP3B,SKA1,MAP6,VASP,MORC2,SREBF2,CENPE,RPF2,CELSR2,PCNA,UFL1,MIPEP,SMTN,SERBP1,SMPD4,GAP43,GOLGA8J,ARFGEF3,SHROOM2,PARK7,NCAPG2,CHAMP1,RAD51AP1,RAB38,DRC7,TOP1,RSPH1,MARK4,CDH5,ARHGAP12,CYFIP1,HOATZ,ZFYVE1,PDCL3,CHCHD2,SPAG6,CDC45,BUB1,SLF1,MAPK9,SPTB,ARFGAP3,STK36,VMP1,DXH29,BMP7,TRAPPC6B,CNOT7,SAMM50</p> |
| GO:0023052 | signaling              | 0.016465463012106395 | <p>BCAR3,LRRRC4C,NOTCH2,MYO9A,TAF4A5,ULK2,NLK,UNC13C,DLC1,ZDHHC21,PTPRA,ITPR2,RDX,STXBP1,RALA,IL1RAPL2,BCL2,PRDM16,ALDH1A2,ARHGAP26,LRFN2,ZEB1,AKR1C3,FGD4,SPRED1,MYO1E,PLPPR1,ALK,MCTP1,RIN2,ANO6,APC,HHLA2,TSHZ3,PLPPR5,CRKL,ILDR2,ARHGAP24,TNIIK,SLC4A10,PTPRJ,RGS3,SCAI,FAM83F,SGMS1,GRIK3,CHSY1,ATP2B2,RXFP1,C5,ZFAND6,FLT1,RABEP1,INVS,EDAR,PRKD1,TPTE2,CHRM3,PELI2,LRP2,FGF12,ONECUT1,TAF4A,BTBD11,SYN2,CCL28,GRM7,TMEM117,RALGAP1,TRPM1,DCLK1,GABRG2,DOCK8,MAPRE2,NDUFAF2,CD2AP,HERPUD2,PTPRR,KCNE4,ARNT,KCNK10,NBN,MSH6,ARHGAP32,HECW1,DUSP22,SV2B,SHC4,HRH2,SYT10,PPP1R1C,ARHGEF17,NCAM1,SLC16A1,CHN1,GLP2R,PAFAH1B1,EFEMP1,TM7SF3,ITGB8,NF2,CNKSR2,HIVEP1,CTNNA1,PPP1R9A,MOB3B,AKAP9,ERMP1,RGL1,NR5A2,GRM1</p>                                                                                                                                                                                                                                                                                                                                                                                                                                                                                                                                                                    |

|            |                       |                      |                                                                                                                                                                                                                                                                                                                                                                                                                                                                                                                                                                                                                                                                                                                                                                                                                                                                                                                                                                                                                                                                                                                                                                                                                                                                                                                                                                                                        |
|------------|-----------------------|----------------------|--------------------------------------------------------------------------------------------------------------------------------------------------------------------------------------------------------------------------------------------------------------------------------------------------------------------------------------------------------------------------------------------------------------------------------------------------------------------------------------------------------------------------------------------------------------------------------------------------------------------------------------------------------------------------------------------------------------------------------------------------------------------------------------------------------------------------------------------------------------------------------------------------------------------------------------------------------------------------------------------------------------------------------------------------------------------------------------------------------------------------------------------------------------------------------------------------------------------------------------------------------------------------------------------------------------------------------------------------------------------------------------------------------|
|            |                       |                      | <p>,GABRG1,PCDH11Y,PPP2R5E,PLA2R1,RIC8B,ANK2,WNT9B,DUSP16,SMARCA4,CDH11,SPG21,CXADR,ATRX,NUAK1,PTPN12,HDAC4,SLC1A1,PRKAA1,ITGB3BP,RI MBP2,NFAT5,GUCY1A2,CAMK4,FGF10,ZC3HAV1,RASGRF1,ZNF675,SH3GL3,NXN,WNK2,ESRRG,FBN2,EGF,P2RX6,PDE3A,SCG5,TRIM5,CLEC16A,STK38L,ABCC4,HTR2A,KREMEN1,MARK2,GCSAML,FHL2,ADGRA3,CNIH3,ANKRD17,APBA2,EVC,GRK3,KNDC1,SPSB4,NOS2,GFRA2,RBBP8,CCND3,CREM,MBP,TGFA,HIP1,CAPN5,NPHP4,PACSIN2,SNX3,BRCA2,ASB7,STRN,OR9Q1,PSG9,CDC42BPB,SOGA1,RALGAPA2,RANBP9,TMEM161A,PDE6C,LEMD3,HMGB1,FGF9,DSTYK,SLAMF1,FAM83B,SMARCC1,SNX6,SMOC2,LAMC1,NEK10,ATF2,CYLD,PSG6,ITGA9,KPNA1,RGMB,ZZEF1,RB1CC1,LALBA,PKP1,RACGAP1,NLRC5,COPS8,SOX30,SLC15A2,OVOL2,NTN1,RRAGD,CRACR2A,BMF,YTHDF3,DEDD2,COLQ,ASH1L,ABCA4,UFD1,TOM1,PLPP4,CARD10,RALGPS2,NDRG2,BMP5,HDGFL3,GRB14,IGHV2-70D,TNN,PSAP,PCNT,IL33,GPRC5C,KL,RASGEF1C,IL10,OR1L6,SFPQ,DIRAS2,ITPRIP,RAB12,RPS12,SRBBF2,THNSL2,HIPK1,DGKK,CD70,TWIST1,ALKAL2,RPF2,CELSR2,UFL1,OR2T3,BRD4,NRBP1,ITGA6,ATP2B1,GAP43,IGHV10R15-9,ADCY9,CNIH1,CIDEA,ARFGEF3,EXT2,SLC6A1,STAT1,BRMS1L,PARK7,ADCYAP1R1,NCAPG2,MYOCD,EFHB,MEF2C,RBPMS2,S100B,RAB38,SPPL2B,PASK,CXCL2,EPHA4,GABRA5,IL17RD,FBXO31,PRKAB1,MARK4,CDH5,NFKBID,ARHGAP12,CLDN18,APIP,CYFIP1,PCDH8,SEMA4D,MC2R,FAT4,IMPA2,WNT5B,AMFR,NENF,OR4L1,ICA1,TPTE,CNKSR1,CDC45,OR11G2,BUB1,SDE2,RBMS3,HDAC2,MAPK9,APELA,GPR137B,FAIM,RNF138,SNRK,STK36,RRAS2,GNA14,CD38,GNAS,BMP7,CNOT7,IL20RB</p> |
| GO:0048468 | cell development      | 0.01773230544209162  | <p>LRRC4C,NOTCH2,MYO9A,ULK2,ZDHHC21,RDX,STXBP1,BCL2,ALDH1A2,MYO1E,ALK,CARMIL1,MAP4,PLPPR5,CRKL,SETD2,TNIF,SLC4A10,MYOF,BCL11A,TMEM182,CECR2,CHSY1,FLI1,PRKD1,LRP2,ONECUT1,SMYD3,GRM7,TBCD,NEDD4L,DCLK1,FIG4,TRPC5,DIP2A,COL27A1,HECW1,FRYL,BRINP1,ADAM22,NCAM1,CHN1,PAFAH1B1,NF2,CTNNA1,PPP1R9A,PRTG,DYSF,ANK2,CDH11,CXADR,ATRX,HDAC4,CRTAC1,L3MBTL3,RASGRF1,PDE3A,DAZL,KREMEN1,MARK2,FHL2,KNDC1,MYOM2,MBP,NPHP4,SNX3,BRCA2,STRN,PTCD2,MSI2,PDE6C,HMGB1,UST,PLS1,NIN,SLC9A4,MAP2,LAMC1,TDRD5,SELENON,DMC1,ITSN2,SOX30,OVOL2,NTN1,HDAC11,DZANK1,BMP5,HDGFL3,TNN,MICALL2,ATRN,IL33,LMX1A,MAP6,VASP,TWIST1,ALKAL2,CELSR2,UFL1,ITGA6,GAP43,GRXCR1,IMPACT,MEF2C,S100B,NECTIN1,DRC7,EPHA4,GABRA5,RSPH1,NUMB,MEGF10,FBXO31,HS6ST1,CDH5,CLDN18,CYFIP1,SEMA4D,FAT4,AKR1B1,WNT5B,DPY19L2,SPAG6,HDAC2,NCS1,FAIM,CD38,BMP7</p>                                                                                                                                                                                                                                                                                                                                                                                                                                                                                                                                                                                     |
| GO:0048699 | generation of neurons | 0.019351240251334764 | <p>LRAPPC9,LRRC4C,NOTCH2,MYO9A,ULK2,STXBP1,BCL2,ALDH1A2,ZEB1,SDCCAG8,ALK,MAP4,PLPPR5,CRKL,TNIF,SLC4A10,BCL11A,CECR2,ATP2B2,PRKD1,LRP2,GRM7,TBCD,NEDD4L,DCLK1,FIG4,TRPC5,DIP2A,HECW1,FRYL,BRINP1,NCAM1,CHN1,PAFAH1B1,CTNNA1,PPP1R9A,PRTG,WNT9B,CDH11,CRTAC1,RASGRF1,SH3GL3,KREMEN1,MARK2,KNDC1,MBP,NPHP4,SNX3,STRN,PDE6C,HMGB1,UST,ESRP1,PLS1,NIN,MAP2,RACGAP1,ITSN2,NTN1,CASZ1,DZANK1,BMP5,HDGFL3,MYCL,TNN,MICALL2,LMX1A,MAP6,VASP,HIPK1,LMX1B,TWIST1,ALKAL2,CELSR2,ITGA6,GAP43,GRXCR1,IMPACT,MEF2C,S100B,NECTIN1,EPHA4,GABRA5,NUMB,FBXO31,HS6ST1,CYFIP1,SEMA4D,FAT4,WNT5B,SPAG6,HDAC2,NCS1,CD38,BMP7</p>                                                                                                                                                                                                                                                                                                                                                                                                                                                                                                                                                                                                                                                                                                                                                                                              |



|            |                                                                    |                      |                                                                                                                                                                                                                                                                                                                               |
|------------|--------------------------------------------------------------------|----------------------|-------------------------------------------------------------------------------------------------------------------------------------------------------------------------------------------------------------------------------------------------------------------------------------------------------------------------------|
| GO:0007423 | sensory organ development                                          | 0.021028678741676195 | BCAR3,NOTCH2,SCAPER,BCL2,ALDH1A2,ZEB1,SPRED1,CECR2,ATP2B2,FLT1,ABCB5,DCLK1,PAFAH1B1,EMP1,NF2,MEIS2,WNT9B,SMARCA4,SLC1A1,FGF10,FBN2,NPHP4,PDE6C,FGF9,CPAMD8,MDM1,ESRP1,PLS1,NTN1,HOXC13,DZANK1,BMP5,VSTM4,MYCL,TTC39C,HIPK1,TWIST1,ATP2B1,GRXCR1,SHROOM2,NECTIN1,EPHA4,GABRA5,FAT4,WNT5B,UNC45B,HDAC2,BMP7                     |
| GO:0031344 | regulation of cell projection organization                         | 0.024869152380703946 | LRRC4C,MYO9A,ULK2,RDX,RALA,SDCCAG8,ALK,CARMIL1,MAP4,APC,PLPPR5,CRKL,ARHGAP24,TNIN,PRKD1,SEPTIN9,NEDD4L,FIG4,TRPC5,HECW1,CHN1,PAFAH1B1,SYNE2,HDAC4,KREMEN1,MARK2,KNDC1,MBP,SNX3,UST,PLS1,NIN,MAP2,CYLD,NTN1,BMP5,TNN,MAP6,ALKAL2,ITGA6,GAP43,EPHA4,FBXO31,MARK4,CYFIP1,SEMA4D,HDAC2,NCS1,CD38,BMP7                             |
| GO:0120035 | regulation of plasma membrane bounded cell projection organization | 0.026486009672339512 | LRRC4C,ULK2,RDX,RALA,SDCCAG8,ALK,CARMIL1,MAP4,APC,PLPPR5,CRKL,ARHGAP24,TNIN,PRKD1,SEPTIN9,NEDD4L,FIG4,TRPC5,HECW1,CHN1,PAFAH1B1,SYNE2,HDAC4,KREMEN1,MARK2,KNDC1,MBP,SNX3,UST,PLS1,NIN,MAP2,CYLD,NTN1,BMP5,TNN,MAP6,ALKAL2,ITGA6,GAP43,EPHA4,FBXO31,MARK4,CYFIP1,SEMA4D,HDAC2,NCS1,CD38,BMP7                                   |
| GO:0034330 | cell junction organization                                         | 0.048591796621255096 | LRRC4C,MYO9A,UNC13C,DLC1,PTPRA,RDX,IL1RAPL2,BCL2,LRFN2,APC,CRKL,PTPRJ,TBCD,GABRG2,MAPRE2,DIP2A,DUSP22,LIMCH1,PAFAH1B1,NF2,CNKSR2,CTNNA1,CDH7,ANK2,CDH11,CXADR,SLC1A1,CDHR3,NPHP4,STRN,LAMC1,PKP1,SYBU,NTN1,COLQ,CD9,MICALL2,LMX1A,IL10,HIPK1,ITGA6,GAP43,SLC6A1,MEF2C,NECTIN1,EPHA4,NUMB,CDH5,CLDN18,CYFIP1,PCDH8,SEMA4D,VMP1 |

**Table S8.** The 184 sets of co-expressed rDNA-contacting genes in differentiating K562 cells. The search was performed in <https://maayanlab.cloud/Enrichr/enrich#> for ARCHS4 TFs Coexp. The database presents the top-300 genes that are co-expressed with transcription factors. All 1485 genes specify the transcription factors and are co-expressed in different combinations.

| Term                                | Overlap | Adjusted P-value      | Genes                                                                                                                                                                                                                                                                                                                                                                                                                                                                                                                                                                                                                                                                                                                                                                                                                         |
|-------------------------------------|---------|-----------------------|-------------------------------------------------------------------------------------------------------------------------------------------------------------------------------------------------------------------------------------------------------------------------------------------------------------------------------------------------------------------------------------------------------------------------------------------------------------------------------------------------------------------------------------------------------------------------------------------------------------------------------------------------------------------------------------------------------------------------------------------------------------------------------------------------------------------------------|
| ZNF704 human tf ARCHS4 coexpression | 126/299 | 4.551107476008999E-34 | ATP8A2;CTNND2;ZBTB20;SLC4A4;SLC8A1;MYLK3;HERC2;ZNF608;HERC1;AKT3;KIF21A;DIP2C;SCAPER;MAGI1;RBFOX1;RBFOX2;TMEM178B;CACNA2D1;TMOD2;MTUS1;FRMD4A;ANK3;TANC2;PYGO1;TANC1;WDFY3;ASTN2;DGKI;ASTN1;MACF1;SHC3;IGSF3;TNKS;KMT2C;PCDH15;ILDR2;RASAL2;CACNA1C;KALRN;NPAS3;FLRT2;FUT9;PLXNA2;SRGAP3;MPDZ;PLXNA4;BPTF;AUTS2;CADM2;NEBL;PTCH1;MICAL3;MYO5A;GRIN2B;CORO2B;DCLK1;PBX1;PTPRD;CCDC88A;ARHGAP32;SDK1;DLG2;NBEA;SPIRE1;FAT3;TCF4;ROBO2;RERE;DOCK3;TENM4;MAST2;GRIK3;ROBO1;AKAP11;TRIM2;MCF2L;PSD3;TMEM108;HYDIN2;DLGAP1;NPIPA1;NEO1;ADAMTS9;ARHGEF12;DST;NAV2;SEZ6L;MPPED1;LRRC7;MPPED2;ARHGEF7;RAPGEF5;PLCB1;DSCAML1;SHANK2;PPM1L;LUZP2;NRXN3;AKAP6;MIPO1;STOX2;KIAA1328;HECTD4;CLVS2;CTNNA3;ATP9A;MAP4K4;ARNT2;ZNF462;FARP1;MYEF2;NTRK3;PCDH7;LSAMP;YLP1;KIAA1549L;PDE4DIP;SORBS2;MYO9A;TTLL7;TJP1;PDE10A;APC;ASXL3;TTC3;RGS12 |
| PLXNA4 human tf ARCHS4              | 126/299 | 4.551107476008999E-34 | ATP8A2;FRMPD4;MYT1L;ANKRD36;CTNND2;RORB;FRY;SLC8A1;HS6ST3;RIMS1;CDH4;ZNF608;DPYSL5;AKT3;TNFR;KIF21A;KIF21B;ANKS1B;SOX5;PPFIA2;ANKRD36C;RBFOX1;EPHA6;RBFOX2;KCNH5;TMEM178B;CACNA2D1;PR                                                                                                                                                                                                                                                                                                                                                                                                                                                                                                                                                                                                                                         |

|                                                  |         |                            |                                                                                                                                                                                                                                                                                                                                                                                                                                                                                                                                                                                                                                                                                                                                                                           |
|--------------------------------------------------|---------|----------------------------|---------------------------------------------------------------------------------------------------------------------------------------------------------------------------------------------------------------------------------------------------------------------------------------------------------------------------------------------------------------------------------------------------------------------------------------------------------------------------------------------------------------------------------------------------------------------------------------------------------------------------------------------------------------------------------------------------------------------------------------------------------------------------|
| coexpressi<br>on                                 |         |                            | KCE;TMOD2;FRMD4A;ANK3;TANC2;MAPK8IP1;SCN8A;HECW1;WDFY3;DGKI;ASTN1;MACF1;SHC3;CTTNBP2;STXBP1;ILDR2;KALRN;CACNA1E;NKAIN2;CTIF;DPP6;FLRT2;FUT9;ZNF704;PLXNA2;ST8SIA5;HIVEP2;SRGAP3;NDF1P1;ARPP21;SYT1;CADM2;TMEM132B;MYO5A;CORO2B;DCLK1;PBX1;SNAP91;PTPRD;CCDC88A;LRFN2;DLG2;DAB1;NBEA;SYNJ1;GNAQ;CNTN1;SPIRE1;FAT3;CCSER1;TCF4;SCN2A;SLC44A5;ROBO2;DOCK3;TENM4;PTPRO;AFF3;ROBO1;C4ORF50;GRM5;AKAP11;GRM7;TRIM2;PSD3;DLGAP1;ZNF385D;NEO1;FAM219A;SORCS3;AJAP1;CNKSR2;MPPED1;NAV3;LRRC7;ARHGEF7;PLCB1;PPM1L;NRXN3;MAPK8;HECTD4;CLVS2;NCAM1;CTNNA2;CSMD2;PAK3;CSMD1;ATP9A;OPCML;ARNT2;NTRK3;LSAMP;SYT16;KIAA1549L;TTLL7;APC;PPP2R2B;ASXL3;TTC3                                                                                                                                 |
| SOX5 human<br>tf ARCHS4<br>coexpressi<br>on      | 119/299 | 2.132125417<br>5670423E-29 | ATP8A2;MYT1L;ANKRD36;CTNND2;RORB;SLC8A1;CDH7;SRGAP2C;GRIP1;AKT3;KIF21A;DIP2C;SRGAP2B;POTEB;PPFIA2;MAGI1;EPHA6;RBFox2;KCNH5;TMEM178B;CACNA2D1;TMOD2;MAGI2;RFX3;KAZN;FRMD4A;ANK3;TANC2;TIAM2;ADGRB3;HECW1;KCNQ3;XPR1;DGKI;GRIA1;SHC3;CTTNBP2;ILDR2;NREP;KALRN;CACNA1E;FLRT2;FUT9;ZNF704;SRGAP3;MPDZ;PLXNA4;BPTF;BCL11B;SIAH3;TMEM132B;SLC4A10;MYO5A;CORO2B;DCLK1;ST18;PBX1;LRP1B;PTPRD;CCDC88A;FER;DLG2;DAB1;NBEA;SPIRE1;FAT3;TCF4;CNTN4;FGF12;LRP12;SLC44A5;ROBO2;CNTNAP2;DOCK3;TENM4;PTPRO;GRIK3;ELAVL4;GRIK2;FMN2;ROBO1;SLC22A14;NHSL1;ADAMTS3;GRM7;LRRTM4;TRIM2;TMEM108;PHACTR3;DLGAP1;ZNF385D;ERC1;NEO1;TTC37;LRRC49;MPPED1;NAV3;LRRC7;MPPED2;SLC24A2;PPM1L;NOL4;FGD4;MAPK8;NCAM1;PAK3;CSMD1;MYEF2;NTRK3;LSAMP;SYT16;KIAA1549L;PDE10A;NFIA;APC;NFIB;PPP2R2B;TTC3;SSBP2 |
| ZNF483<br>human tf<br>ARCHS4<br>coexpressi<br>on | 118/299 | 7.439628970<br>064889E-29  | ATP8A1;FRMPD4;MYT1L;DGKB;ZBTB20;RORB;SLC8A1;RIMS2;RIMS1;AKT3;SAMD12;PRKACB;ANKS1B;KCNH1;UNC13C;EPHA6;KCNH5;TMOD2;MAGI2;ANK3;SHISA9;PIAS2;GABRG1;ADGRB3;SCN8A;HECW1;WDPCP;WDFY3;ASTN2;DGKI;NECAB1;SLC1A2;KALRN;NALCN;GLB1L3;MTMR7;GRIN2A;DPP6;PDZD2;SNTG1;FUT9;DTNA;SYT1;CADM2;SLC4A10;MYO5A;GRIN2B;LRP1B;PTPRD;FAM135B;DLG2;NBEA;TMEM116;CNTN1;CPE;FAT3;SCN2A;GABRB3;SPAG16;CCDC122;DOCK3;RASGRF2;EFCAB6;RYR3;C4ORF50;UNC80;GRM5;AKAP11;LRRTM4;CA5A;TRIM2;ADAMTS13;PSD3;HYDIN2;DLGAP1;DLGAP2;SLC2A13;OPRM1;KIF6;AJAP1;CNKSR2;DNM3;LRRC7;KCNMA1;RAPGEF5;PLCB1;SLC24A2;PPM1L;RGPD6;RGPD5;AKAP6;MIPOL1;RANBP3L;KIAA1328;SV2B;CLVS2;PAK3;CSMD1;ATP9B;GPR158;ATP9A;OPCML;RIC3;PCDH9;NEGR1;NTRK3;CADPS;SYT16;KIAA1549L;TTLL7;MAPK10;AGBL4;APC;PPP2R2B;PTPN4;ASB3;TNRC6B;HCN1    |
| MYT1L<br>human tf<br>ARCHS4<br>coexpressi<br>on  | 117/299 | 2.729558005<br>106311E-28  | ATP8A2;FRMPD4;ANKRD36;CTNND2;ZBTB20;RORB;RIMS2;RPH3A;RIMS1;AKT3;SH3GL2;ANKS1B;PPFIA2;RGS7;ANKRD36C;RBFox1;RBFox2;TMEM178B;TMOD2;MAGI2;ANK3;TANC2;ADGRB3;SCN8A;HECW1;KCNQ3;ASTN1;GRIA1;RTN1;SHC3;CTTNBP2;STXBP1;NTM;SLC1A2;RASAL2;NREP;NYAP2;KALRN;NALCN;CACNA1E;GRIN2A;DPP6;PGBD5;FUT9;CAMTA1;SRGAP3;PLXNA4;PTPRN2;DTNA;SYT1;CADM2;SLC4A10;MYO5A;GRIN2B;DCLK1;SNAP91;PTPRD;CCDC88A;RALYL;DLG2;NBEA;CNTN1;FAT3;TCF4;C8ORF34;GABRB3;DPP10;DOCK3;PTPRO;CELF4;ELAVL4;GRIK2;UNC80;GRM5;GRM7;TRIM2;MCF2L;PSD3;PHACTR3;DLGAP1;DLGAP2;GARNL3;LRRC49;SYN2;PGM2L1;AJAP1;CNKSR2;DNM3;MPPED1;LRRC7;PLCB1;SLC24A2;PPM1L;NRXN3;AKAP6;STOX2;SV2B;CLVS2;NCAM1;CTNNA2;PAK3;PAK5;ATP9A;OPCML;GABBR2;ARNT2;KCNJ6;NTRK3;SYT16;KIAA1549L;ATP2B2;TTLL7;MAPK10;APC;PPP2R2C;PPP2R2B;TTC3          |

|                                                  |         |                            |                                                                                                                                                                                                                                                                                                                                                                                                                                                                                                                                                                                                                                                                                                                         |
|--------------------------------------------------|---------|----------------------------|-------------------------------------------------------------------------------------------------------------------------------------------------------------------------------------------------------------------------------------------------------------------------------------------------------------------------------------------------------------------------------------------------------------------------------------------------------------------------------------------------------------------------------------------------------------------------------------------------------------------------------------------------------------------------------------------------------------------------|
| SETBP1<br>human tf<br>ARCHS4<br>coexpressi<br>on | 112/299 | 3.716730184<br>1993506E-25 | CPNE4;MYT1L;ANKRD36;CTNND2;ZBTB20;GRIP1;ZNF608;DACH1;CDH2;DPYSL5;AKT3;KIF21A;SOX6;SRGAP2B;SOX5;PPFIA2;MAGI1;ANKRD36C;WSB1;RBFOX2;TMEM178B;CACNA2D1;MAGI2;RFX3;FRMD4A;PYGO1;IFT81;ADGRB3;DOK5;ASTN2;TOX;XPR1;ASTN1;GRIA1;TNKS;PDE1A;ILDR2;RASAL2;NREP;KALRN;NPAS3;NKAIN3;SNTG1;FUT9;ZNF704;PLXNA2;SRGAP3;LRRC4C;MPDZ;PLXNA4;AUTS2;ST8SIA1;ST8SIA2;CORO2B;DCLK1;PBX1;PTPRD;CCDC88A;LRFN5;DLG2;NBEA;RNF182;ZNF536;FAT3;TCF4;SLC44A5;ROBO2;DRAXIN;TENM4;ELAVL4;BICD1;SYNE2;ROBO1;GRM7;LRRTM4;TRIM2;RALGPS1;GARNL3;ADGRV1;KCND3;LRRC49;TCF12;LRRC7;MPPED2;NRXN3;NOL4;MIPOL1;FGD4;STOX2;GNG2;NCAM1;CTNNA2;CSMD2;PAK3;PAK5;ZNF462;FARP1;NTRK2;MBD5;MYEF2;NTRK3;LSAMP;YLPM1;MAPK10;NFIA;APC;FABP7;ASXL3;TTC3;YPEL1;SSBP2;TNRC6B |
| SORBS2<br>human tf<br>ARCHS4<br>coexpressi<br>on | 108/299 | 9.116971763<br>335655E-23  | FHOD3;MYT1L;SLC8A1;MYLK3;CDH2;DPYSL5;ZSCAN30;AKT3;LONP2;KIF21A;LARGE1;MAGI1;EPHA7;MLIP;RBFXX2;CACNA2D1;MAGI2;MTUS2;FRMD4A;ANK3;UNC5D;TANC2;TIAM2;TOM1L2;KCNQ3;SLC27A6;ALPK3;WDFY3;MXRA7;ALPK2;XPR1;DGKI;MACF1;RASAL2;CACNA1C;NREP;KALRN;LPP;ZNF704;PLXNA2;SRGAP3;MPDZ;CADM1;SPHKAP;AUTS2;NEBL;ST8SIA2;ST18;SNAP91;PTPRD;DLG2;RCAN2;PDE3A;TCF4;ROBO2;RYR2;MYOM1;TENM4;ELAVL4;PTPRM;LDB3;SIPA1L2;PTPRG;RASGEF1B;TRIM2;MYO18B;PSD3;PGM5;RALGPS1;DST;DCC;LRRC49;ENAH;LRRC7;NOS1AP;SHANK2;PRKAA2;AKAP6;STOX2;TBX20;NHS;CTNNA3;NCAM1;CSMD3;PAK3;PDLIM5;CORIN;CLVS1;ZNF462;FARP1;MYEF2;NTRK3;CADPS;SYT16;PDE4DIP;PPP2R3A;KIAA0232;CDC42BPA;MAPK10;PDE10A;NFIA;NFIB;KLHL7;ASXL3;TTC3;YPEL1;TACC2;HCN1                           |
| SATB2<br>human tf<br>ARCHS4<br>coexpressi<br>on  | 103/299 | 5.382637897<br>0828905E-20 | ZFYVE9;FRMPD4;MYT1L;ANKRD36;SLC8A1;EPS8;CDH4;KIF21A;ANKS1B;SOX5;PPFIA2;RGS7;ANKRD36C;KCNH5;TMEM178B;CACNA2D1;TMOD2;MAGI2;FRMD4A;ANK3;SHISA9;EML1;TANC2;TIAM2;GAREM1;ULK2;ASTN2;DGKI;SHC3;CTTNBP2;TNKS;RASAL2;KALRN;NKAIN2;FLRT2;FUT9;ZNF704;PLXNA2;ANKRD20A5P;ST8SIA5;PLXNA4;ARRPP21;CADM2;MYO5A;GRIN2B;CORO2B;DCLK1;PTPRD;CCDC88A;DLG2;DAB1;NBEA;SYNJ1;SPIRE1;FAT3;CCSER1;CNTN3;TCF4;SCN2A;RGL1;SLC44A5;ROBO2;SETD2;DOCK3;TENM4;PTPRO;NHSL1;GRM7;TRIM2;TMEM108;PHACTR3;HYDIN2;DLGAP1;DLGAP2;NEO1;SLC2A13;COBL;FAM126B;ARID1B;ITFG1;DNM3;MMP16;MPPED1;NAV3;LRRC7;SHANK2;LUZP2;RGPD6;ATP10B;MIPOL1;MAPK8;NCAM1;PAK5;ATP9A;NTRK3;KIAA1549L;LHFPL3;C1ORF21;TTLL7;APC;ASXL3;PTPN4;CCDC171                                   |
| PBX1 human<br>tf ARCHS4<br>coexpressi<br>on      | 103/299 | 5.382637897<br>0828905E-20 | ATP8A2;MYT1L;CTNND2;KLHL32;ZBTB20;ADARB2;RPS6KA5;ZNF608;CDH2;DPYSL5;PEG10;KIF21A;KIF21B;EPHB2;LARGE1;MAGI1;RBFOX2;TMEM178B;CACNA2D1;MAGI2;FRMD4A;ANK3;SHISA9;FOXP2;TANC2;PYGO1;WDPCP;WDFY3;ASTN2;XPR1;DGKI;IGSF3;CHRNA7;NTM;CACNA1C;NREP;KALRN;NPAS3;PGBD5;ZNF704;CAMTA1;SRGAP3;ASIC2;ZNF423;MPDZ;PLXNA4;CADM1;AUTS2;ST8SIA2;TMEM132B;NETO2;GRIN2B;DCLK1;PTPRD;CCDC88A;NBEA;GNAQ;FAT3;GABRB3;ROBO2;DRAXIN;DOCK3;TENM4;PTPRO;CELF4;ELAVL4;ROBO1;TRIM2;ADAMTSL3;ZNF385D;NEO1;LRRC49;GFRA1;NAV2;SORCS3;PGM2L1;NAALADL2;AJAP1;LRRC7;PPP1R12B;PPM1L;MIPOL1;STOX2;CECR2;GTF2IP1;KIAA1328;CTNNA2;PAK3;CSMD1;PAK5;ATP9A;ZNF462;FARP1;MBD5;KCNJ6;MYEF2;NTRK3;LSAMP;MAPK10;NEDD4;TTC3;ASB4;ADGRL2                                 |
| RORB human<br>tf ARCHS4<br>coexpressi<br>on      | 103/299 | 5.382637897<br>0828905E-20 | ATP8A2;FRMPD4;MYT1L;CTNND2;SLC8A1;RIMS2;RPH3A;RIMS1;PRKACB;SH3GL2;ANKS1B;PPFIA2;KCNH1;RGS7;UNC13C;RBFOX1;KCNH5;TMOD2;ANK3;GABRG2;GABRG1;ADGRB3;SCN8A;HECW1;DGKI;ASTN1;NECAB1;SHC3;STXBP1;SLC1A2;KALRN;NALCN;GRIN2A;DPP6;PGBD5;FUT                                                                                                                                                                                                                                                                                                                                                                                                                                                                                       |

|                                                    |         |                            |                                                                                                                                                                                                                                                                                                                                                                                                                                                                                                                                                                                                                                                                    |
|----------------------------------------------------|---------|----------------------------|--------------------------------------------------------------------------------------------------------------------------------------------------------------------------------------------------------------------------------------------------------------------------------------------------------------------------------------------------------------------------------------------------------------------------------------------------------------------------------------------------------------------------------------------------------------------------------------------------------------------------------------------------------------------|
|                                                    |         |                            | 9;ST8SIA5;CAMTA1;SRGAP3;PLXNA4;NDFIP1;DTNA;SYT1;CADM2;SLC4A10;MYO5A;GRIN2B;DCLK1;SNAP91;PTPRD;DLG2;SYNJ1;CNTN1;SCN2A;GABRB3;PTPRT;DOCK3;KCNC1;OTUD7A;UNC80;TRIM9;GRM5;AKAP11;TRIM2;PSD3;DLGAP1;DLGAP2;MYRIP;SYN2;AJAP1;CNKSR2;DNM3;MPPED1;LRRC7;RAPGEF5;PLCB1;RAPGEF4;SLC24A2;PPM1L;KIAA0513;SV2B;CLVS2;NCAM1;CTNNA2;PDE6A;PAK3;ATP9A;WASF3;OPCML;GABBR2;ARNT2;ATRN1;NTRK3;CADPS;LSAMP;SYT16;KIAA1549L;ATP2B2;TTLL7;APC;PPP2R2C;PPP2R2B;HCN1                                                                                                                                                                                                                       |
| MEIS2<br>human tf<br>ARCHS4<br>coexpressi<br>on    | 101/299 | 5.978116687<br>893467E-19  | ERO1B;MYT1L;CTNND2;ZBTB20;SLC8A1;HS6ST3;SCGN;CDH4;ZNF608;DACH1;KIF21A;KIF21B;RGS8;SOX5;MAGI1;RBFOX2;KCNH5;TMEM178B;CACNA2D1;TMOD2;MAGI2;MTUS2;FRMD4A;ANK3;SHISA9;EML1;TANC2;WDPCP;ASTN2;DGKI;CTTNBP2;RASAL2;NREP;NYAP2;KALRN;FLRT2;FUT9;ZNF704;PLXNA2;STXBP6;SRGAP3;PLXNA4;ZFX3;PTPRN2;CADM1;AUTS2;NEBL;BTBD9;GRIN2B;LRP1B;PTPRD;RALYL;PLCXD3;FGF14;NBEA;RNF182;SPIRE1;CPE;LHX9;GABRB3;ROBO2;DRAXIN;TENM4;ELAVL4;GLI3;ROBO1;UNC80;GRM7;TRIM2;MCF2L;PHACTR3;HYDIN2;ABCC8;NAV3;LRRC7;CNKSR3;MPPED2;MYO3A;RGPD5;NOL4;MIPOL1;GNG2;NCAM1;CSMD3;PAK3;MBD5;MYEF2;ANKRD30BL;NTRK3;CADPS;LSAMP;SYT16;MAPK10;MEIS1;PDE10A;APC;PPP2R2B;NEDD4;ASXL3;TTC3;ASB3                  |
| TRIM23<br>human tf<br>ARCHS4<br>coexpressi<br>on   | 101/299 | 5.978116687<br>893467E-19  | ATP8A2;ATP8A1;FRMPD4;MYT1L;DGKB;CTNND2;RPH3A;SYNPR;AKT3;KIF21A;PRKACB;SH3GL2;ANKS1B;PPFIA2;KCNH1;RBFOX1;CACNA2D1;TMOD2;CACNA2D3;SCAMP1;GABRG2;GABRG1;ADGRB3;SCN8A;FAR1;KCNQ5;WDFY3;ASTN1;NECB1;RTN1;STXBP1;SLC1A2;NALCN;GRIN2A;FUT9;NDFIP1;DTNA;SYT1;CADM2;SLC4A10;MYO5A;BTBD10;CORO2B;DCLK1;SNAP91;PTPRD;DLG2;FGF14;NBEA;SYNJ1;RCAN2;CNTN1;SCN2A;CDK14;FGF12;CPEB4;GABRB3;DPP10;RNF11;DOCK3;TRIM9;GRM5;AKAP11;TRIM2;PSD3;DLGAP1;EDIL3;KCND2;PDE4D;SYN2;PJA2;CNKS2;DNM3;RAPGEF2;RAPGEF5;PLCB1;RAPGEF4;SLC24A2;PPM1L;NRXN3;AKAP6;KIAA0513;SV2B;CLVS2;SPOCK1;NCAM1;CTNNA2;NCAM2;GPR158;ATP9A;OPCML;ARNT2;CA10;ATRN1;SYT16;KIAA1549L;ATP2B2;TTLL7;APC;PPP2R2C;PPP2R2B |
| TCF4 human<br>tf ARCHS4<br>coexpressi<br>on        | 100/299 | 1.969170425<br>3345607E-18 | MYT1L;ANKRD36;SLC8A1;SRGAP2C;ZNF608;ZSCAN30;AKT3;KIF21A;SCAPER;SRGAP2B;ANKS1B;PPFIA2;MAGI1;ANKRD36C;RBFOX2;MAGI2;RFX3;SHISA9;TIAM2;ADGRB3;DOK5;KCNQ3;ASTN2;GRIA1;CTTNBP2;NTM;PCDH15;RASAL2;NREP;NYAP2;KALRN;NPAS3;NKAIN2;FLRT2;SNTG1;FUT9;ZNF704;ST8SIA5;SRGAP3;PLXNA4;GRIA4;ST8SIA2;CORO2B;DCLK1;PTPRD;CCDC88A;FER;DLG2;NBEA;ZNF536;FAT3;CCSER1;SCN2A;ROBO2;TENM4;CHD9;PTPRO;ELAVL4;SLC35F1;AFF3;BICD1;NHSL1;GRM7;LRRTM4;TRIM2;DLGAP1;TCF12;FAM126B;ZDHC17;ARID1B;MMP16;MPPED1;NAV3;IL1RAPL2;MPPED2;VSTM2A;DSCAML1;CRB1;NRXN3;MIPOL1;STOX2;CLVS2;NCAM1;PAK5;RFTN2;ZNF462;MBD5;MYEF2;NTRK3;KIAA1549L;TTLL7;NFIA;APC;NFIB;KLHL7;ASXL3;TTC3;PTPN4;SSBP2;ASB3         |
| KIAA1549<br>human tf<br>ARCHS4<br>coexpressi<br>on | 99/299  | 5.997659546<br>927141E-18  | ATP8A2;MYT1L;CTNND2;CDH4;ZNF608;CDH2;DPYSL5;AKT3;KIF21A;RGS8;ANKS1B;PPFIA2;MAGI1;RBFOX2;TMEM178B;CACNA2D1;MAGI2;RFX3;FRMD4A;ANK3;SHISA9;TANC2;IFT81;HECW1;KCNQ3;XPR1;SHC3;IGSF3;CHRNA7;NTM;RASAL2;NREP;KALRN;CACNA1E;NPAS3;PHF21B;FUT9;ZNF704;PLXNA2;CAMTA1;SRGAP3;MPDZ;PLXNA4;AUTS2;ST8SIA2;PTCH1;NETO2;GRIN2B;DCLK1;PBX1;PTPRD;CCDC88A;DLG2;NBEA;DLG5;FAT3;TCF4;SCN2A;GABRB3;PTPRT;ROBO2;DRAXIN;TENM3;TENM4;PTPRO;CELF4;ELAVL4;GRIK2;ROBO1;GRM7;TRIM2;ADAMTSL3;TMEM108;DCC;LRRC49;HUNK;PGM2L1;NAV3;LRRC7;ARHGEF7;AKAP6;STOX2;MAPK8;GNG2;NCAM1;CSMD2;PAK3;P                                                                                                       |

|                                                   |        |                           |                                                                                                                                                                                                                                                                                                                                                                                                                                                                                                                                                                                                                                                                                                                                                            |
|---------------------------------------------------|--------|---------------------------|------------------------------------------------------------------------------------------------------------------------------------------------------------------------------------------------------------------------------------------------------------------------------------------------------------------------------------------------------------------------------------------------------------------------------------------------------------------------------------------------------------------------------------------------------------------------------------------------------------------------------------------------------------------------------------------------------------------------------------------------------------|
|                                                   |        |                           | AK5; ARNT2; ZNF462; FARP1; MBD5; MYEF2; NTRK3; LSAMP; KIAA1549L; APC; ZNF618; ASXL3                                                                                                                                                                                                                                                                                                                                                                                                                                                                                                                                                                                                                                                                        |
| SLC4A10<br>human tf<br>ARCHS4<br>coexpressi<br>on | 99/299 | 5.997659546<br>927141E-18 | ATP8A1; FRMPD4; MYT1L; DGKB; LDLRAD4; SLC8A1; HS6ST3; RPH3A; SYNPR; SAMD12; PRKACB; SH3GL2; ANKS1B; PPF1A2; KCNH1; RGS7; UNC13C; RBFOX1; PRKCE; TMOD2; GABRG2; GABRG1; PCP4; ADGRB3; SCN8A; KCNQ3; NGEF; NECAB1; SHC3; STXBP1; SLC1A2; KALRN; NALCN; GRIN2A; DPP6; PGBD5; PTPRN2; NDFIP1; SYT1; CADM2; MYO5A; GRIN2B; CORO2B; DCLK1; SNAP91; LRP1B; DLG2; SYNJ1; RCAN2; CNTN1; CPE; SCN2A; FGF12; GABRB3; DOCK3; RASGRF2; UNC80; TRIM9; GRM5; AKAP11; TRIM2; PSD3; DLGAP1; KCND3; SLC2A13; MYRIP; SYN2; PJA2; AJAP1; CNKSR2; DNM3; LRRC7; KCNMA1; RAPGEF5; PLCB1; RAPGEF4; SLC24A2; KIAA0513; SV2B; CLVS2; CTNNA2; NCAM2; GPR158; ATP9A; OPCML; GABBR2; ARNT2; CA10; ATRNL1; NTRK3; KCNIP4; SYT16; KIAA1549L; ATP2B2; TLL7; MAPK10; PPP2R2C; PPP2R2B; HCN1 |
| MACF1<br>human tf<br>ARCHS4<br>coexpressi<br>on   | 98/299 | 1.945964858<br>218302E-17 | TRIO; MAML2; ATP8A1; RORA; FRY; DOCK10; PTAR1; HERC2; HERC1; MPRIP; PIEZO2; SACS; ANKFY1; DIP2B; MAP3K5; MBNL1; FNDC3B; TANC2; TANC1; WDFY3; UTRN; NOTCH2; KMT2C; ITPR2; IQGAP1; CACNA1C; LPP; PCNX1; ATXN1; ZNF704; HIVEP2; CREBBP; LRBA; DENND4C; EXOC6B; MICAL3; MYO5A; LNPEP; DNAJC13; ARHGAP26; SMARCA2; MED13L; PTPRB; DMXL2; FAT1; CCSER2; DOCK4; DOCK9; DOCK8; RASGRF2; PTPRM; LIMD1; LYST; MYSM1; SYNE2; AKAP13; NIPBL; C16ORF72; AKAP11; ZNF407; KIF13A; RBM33; ARHGEF12; ITGA4; DST; VPS13C; ARAP2; VPS13B; URB1; ARID1B; NCOR1; PEAK1; BIRC6; PPP1R12B; DOCK2; DOCK1; KDM7A; NFAT5; WDR26; HERC2P2; BTAF1; KIAA1328; HECTD1; HECTD4; ZNF106; ARFGEF1; USP24; SPEN; MON2; TRAPPC10; MGA; ERBIN; YLPM1; ADAM32; MYO9A; MTOR; TJP1; SLMAP         |
| ASH1L<br>human tf<br>ARCHS4<br>coexpressi<br>on   | 97/299 | 5.894800713<br>503227E-17 | PATJ; TRIO; ATP8A1; ANKRD36; RORA; FRY; HERC2; HERC1; AKT3; DIP2B; TMOD2; TANC2; WDPCP; WDFY3; ASTN2; UTRN; MACF1; KMT2C; ITPR2; CACNA1C; KALRN; CACNA1E; LPP; PCNX1; PDZD2; ZNF704; TRPM7; HIVEP2; BPTF; CREBBP; LRBA; DENND4C; MICAL3; MYO5A; LNPEP; ARHGAP26; SMARCA2; PHC3; GRIN2B; MED13L; ARHGAP32; DMXL2; CDK12; SETD2; DOCK3; DOCK9; RASGRF2; LYST; MYSM1; SYNE2; UNC80; AKAP13; NIPBL; C16ORF72; AKAP11; ADAMTSL3; ZNF407; PSD3; ERC1; RBM33; ARHGEF12; KCND2; DST; VPS13C; ARAP2; VPS13B; ARID1B; NCOR1; PEAK1; BIRC6; RAPGEF5; PLCB1; NFAT5; MIPOL1; BTAF1; KIAA1328; HECTD1; HECTD4; ATP9B; ARFGEF1; USP24; SPEN; MBD5; MON2; MGA; ZNF804B; ERBIN; YLPM1; ADAM32; PDE4DIP; MYO9A; GATAD2B; TLL7; APC; KANSL1; NEDD4; SLMAP                     |
| NPAS3<br>human tf<br>ARCHS4<br>coexpressi<br>on   | 97/299 | 5.894800713<br>503227E-17 | APP; CTNND2; ZBTB20; CDH4; DACH1; CDH2; DPYSL5; PEG10; AKT3; KIF21A; SOX6; SRGAP2B; ANKS1B; MAGI1; TMEM178B; TMOD2; MAGI2; RFX3; KAZN; FRMD4A; PYGO1; IFT81; ADGRB3; TNIK; ASTN1; GRIA1; SHC3; NTM; ILDR2; NREP; DPP6; NKAIN3; CDH20; FUT9; CAMTA1; SRGAP3; MPDZ; NDFIP1; DTNA; CADM1; AUTS2; CADM2; ST8SIA1; PXDNL; NETO2; CORO2B; DCLK1; PBX1; PTPRD; CCDC88A; SDK1; CNTN1; FAT3; TCF4; SPAG16; DPP10; DRAXIN; TENM3; GRIK4; SLC35F1; FMN2; SIPA1L2; GRM3; TRIM9; GRM5; TRIM2; TMEM108; ADGRV1; KCND3; LRRC49; SEZ6L; PARD3B; NRG3; MPPED2; LUZP2; STOX2; GNG2; TMEM67; LRIG1; NCAM1; CTNNA2; PAK3; JAM2; ATP9A; ARNT2; ZNF462; NTRK2; MYEF2; NTRK3; KIAA1549L; TLL7; MAPK10; APC; PPP2R2B; FABP7; SMOC1; TTC3                                           |
| FAM171B<br>human tf<br>ARCHS4<br>coexpressi<br>on | 95/299 | 6.190821108<br>679311E-16 | GABRB3; SPAG16; ROBO2; SEMA5A; DPP10; ERO1B; FRMPD4; DGKB; SLC35F1; PTPRG; TIAL1; PCMTD2; SRGAP2C; SYNPR; TRIM9; GRM5; NHSL1; LRRTM4; TRIM2; TLK1; KIF21A; ZNF568; SAMD12; PRKACB; DLGAP2; EDIL3; SRGAP2B; ANKS1B; PCMTD1; PPF1A2; EPHA7; WSB1; SLC2A13; MAGI2; RFX3; SEZ6L; GABRG2; PJA2; CNKSR2; ADGRB3; LRRC7; MPPED2; KCNQ3; PLCB1; SLC24A2; NECAB1; NLGN1; SAR1A; CTTN                                                                                                                                                                                                                                                                                                                                                                                |

|                                     |        |                       |                                                                                                                                                                                                                                                                                                                                                                                                                                                                                                                                                                                                                    |
|-------------------------------------|--------|-----------------------|--------------------------------------------------------------------------------------------------------------------------------------------------------------------------------------------------------------------------------------------------------------------------------------------------------------------------------------------------------------------------------------------------------------------------------------------------------------------------------------------------------------------------------------------------------------------------------------------------------------------|
|                                     |        |                       | BP2;ATL1;NRXN1;BTF3L4;RAP1GDS1;EFNA5;NOL4;NALCN;SDCBP;GRIN2A;SNTG1;FUT9;NCAM2;GPR158;AKAIN1;RFTN2;MYEF2;CADM1;SYT1;CADM2;INSR;NTRK3;CADPS;SLC4A10;SYT16;CDC42BPA;OXR1;SNAP91;TTLL7;PTPRD;IGSF11;FGF14;NFIA;NBEA;APC;NFIB;PPP2R2B;TTC3;CNTN1;CPE;TCF4;ASB4;SCN2A;PTPN4;SSBP2;FGF12;CPEB4                                                                                                                                                                                                                                                                                                                            |
| PKNOX2 human tf ARCHS4 coexpression | 94/299 | 1.912843891850123E-15 | ROBO2;DOCK3;TENM4;CTNND2;PTPRO;GRIK3;RORB;ADARB2;MYLK3;ROBO1;RIMS1;RPS6KA5;ZNF608;GRM7;CA5A;TRIM2;ADAMTSL3;MCF2L;PSD3;TNR;DLGAP1;KIF21B;ZNF385D;NEO1;SOX5;PPFIA2;RBFOX1;EPHA6;RBFOX2;KCNH5;TMEM178B;CACNA2D1;TMOD2;FRMD4A;ABCC9;ANK3;SORCS3;SHISA9;KLF15;TANC2;AJAP1;MPPED1;NAV3;LRRC7;PEAK1;CNKSR3;WDPCP;DGKI;SHC3;STXBP1;ILDR2;KALRN;DPP6;KIAA1328;FLRT2;FUT9;ZNF704;HECTD4;NCAM1;SRGAP3;PAK3;CSMD1;ATP9B;PLXNA4;ATP9A;ARNT2;FARP1;ZFHX3;AUTS2;NEGR1;ANKRD30BL;TMEM132B;NTRK3;MICAL3;LSAMP;YLP1;KIAA1549L;MYO5A;GRIN2B;DCLK1;PBX1;PTPRD;CCDC88A;DLG2;DAB1;PDE10A;NBEA;APC;PPP2R2B;NEDD4;FAT3;RGS12;ASB3;FBXL7    |
| NFIA human tf ARCHS4 coexpression   | 92/299 | 1.838184372535877E-14 | ROBO2;CNTNAP2;TENM4;MYT1L;ANKRD36;CLCN3P1;PTPRO;GRIK3;ELAVL4;SLC35F1;GRIK2;EFCAB6;BICD1;SYNE2;PTPRG;CDH7;SRGAP2C;NHSL1;ADAMTS3;RASGEF1B;LRRTM4;AKT3;TMEM108;PHACTR3;KIF21A;SRGAP2B;SOX5;GARNL3;PPFIA2;RGS7;EPHA7;ZNF160;LRRC49;MAGI2;RFX3;KAZN;CDKAL1;FRMD4B;ENAH;ADGRB3;LRRC7;HECW1;MPPED2;KCNQ3;RAPGEF2;ZFPM2;ZNF234;XPR1;SHANK2;GRIA1;SLC24A2;CRB1;CTTNBP2;BTF3L4;NYAP2;NOL4;NPAS3;SNTG1;PLXNA2;SRGAP3;JAM2;PAK5;OPCML;RFTN2;ZNF462;MYEF2;BCL11B;ST8SIA1;INSR;NTRK3;SYT16;SORBS2;PPP2R3A;KIAA0232;CORO2B;NBEAP1;ST18;PTPRD;CCDC88A;DAB1;NBEA;APC;PPP2R2B;AGO1;TTC3;FAT3;CNTN3;TCF4;ASB4;FGF12;LRP12;HCN1        |
| NFAT5 human tf ARCHS4 coexpression  | 91/299 | 4.989038209990635E-14 | DIDO1;DOCK5;SETD2;TRIO;MAML2;DOCK9;KIAA1671;PTPRM;RORA;LIMD1;MYSM1;SYNE2;AKAP13;NIPBL;HERC2;C16ORF72;AKAP11;HERC1;MPRIP;SH3PXD2A;ADAMTSL3;ZNF407;KIF13A;RBM33;ARHGEF11;MBNL1;MBNL2;ARHGEF12;DST;VPS13C;FNDC3B;ARAP2;VPS13B;ARID1B;TANC2;PATL1;TANC1;NCOR1;PEAK1;WDPCP;WDFY3;BI RC6;ASTN2;UTRN;KDM7A;NOTCH2;MACF1;WDR26;KMT2C;ITPR2;IQGAP1;NLK;LPP;MIPOL1;ATXN3;PCNX1;SEC14L1;ATXN1;KIAA1328;HECTD1;HECTD4;HIVEP2;ATP9B;ARFGEF1;USP24;SPEN;FARP1;CREBBP;MON2;LRBA;TRAPPC10;DENND4C;MICAL3;ERBIN;YLP1;ADAM32;LNPEP;ARHGAP26;SMARCA2;PHC3;MYO9A;GATAD2B;MED13L;TJP1;KANSL1;NEDD4;SLMAP;AGO2;DMXL2;FAT1;CDK12          |
| AFF3 human tf ARCHS4 coexpression   | 91/299 | 4.989038209990635E-14 | PTPRT;DPP10;CCDC122;MYT1L;ANKRD36;CTNND2;DPY19L2P2;LDLRAD4;EFCAB6;FRY;SLC8A1;CEP128;UNC80;POTEKP;CCDC91;GRM7;ZSCAN30;PPIP5K2;TRIM2;ADAMTSL3;AKT3;PRKACB;ANKS1B;PPFIA2;POTEC;ANKRD36C;KCND2;PRKCB;PRKCE;TMOD2;MAGI2;VPS13B;TBC1D9;FRMD4B;SHISA9;ARID1B;GAREM1;MPPED1;BANK1;LRRC7;HECW1;KCNQ3;WDPCP;ASTN2;ZMYND11;ANKRD36B;BLK;GRIA1;AKAP6;NREP;LRP2;KALRN;MIPOL1;NPAS3;KIAA1328;GNG7;HECTD4;CLVS2;ANKRD36BP2;NCAM1;SRGAP3;ATP9B;PLXNA4;NTRK2;MBD5;CEP112;AUTS2;SYT1;CADM2;ST8SIA2;NTRK3;SETDB2;MYO5A;ADAM32;PARP15;GRIN2B;CORO2B;DCLK1;TTLL7;PTPRD;CCDC88A;DLG2;SYNJ1;TTC3;NEK10;YPEL1;TCF4;SSBP2;CDK14;ASB3;TNRC6B |
| POGZ human tf ARCHS4 coexpression   | 91/299 | 4.989038209990635E-14 | GABRB3;REFE;CNTNAP2;ANKRD36;CHD9;GADL1;AFF3;SYNE2;IGF1R;TIAL1;DTWD2;UNC80;HERC2;ZNF608;LIP1;TRIM2;ADAMTSL3;MCF2L;AKT3;TLK1;KIF21A;NPTPA1;NEO1;SRGAP2B;POTEC;MAGI1;ANKRD36C;HFM1;VPS1                                                                                                                                                                                                                                                                                                                                                                                                                               |

|                                     |        |                        |                                                                                                                                                                                                                                                                                                                                                                                                                                                                                                                                                                                                   |
|-------------------------------------|--------|------------------------|---------------------------------------------------------------------------------------------------------------------------------------------------------------------------------------------------------------------------------------------------------------------------------------------------------------------------------------------------------------------------------------------------------------------------------------------------------------------------------------------------------------------------------------------------------------------------------------------------|
| on                                  |        |                        | 3B;NAV2;SHISA9;SEZ6L;ARID1B;FOXP2;TANC2;NAV3;PEAK1;WPCP;FAM193A;ASTN2;XPR1;SHANK2;MACF1;NFAT5;TNKS;KMT2C;NRXN1;RGPD6;RGPD5;KALRN;FAM214A;MIPOL1;ATXN3;KIAA1328;ZNF704;CECR7;HECTD4;GSE1;TRPM7;MPDZ;BPTF;SPEN;ZNF462;FARP1;CREBBP;MYEF2;AUTS2;MGA;RANBP17;CADPS;MICAL3;YLPML1;ADAM32;CDC42BPA;PHC3;GATAD2B;PTPRD;MLLT10;NFIA;NBEA;KANSL1;NFIB;AGO1;DLG5;AGO2;TTC3;TCF4;ASB4;EIF4G3;ASB3;TNRC6B                                                                                                                                                                                                     |
| MBNL2 human tf ARCHS4 coexpression  | 90/299 | 1.462083056152094E-13  | RNF11;ATP8A1;FRMPD4;DOCK9;PTPRM;RORA;PTPRK;RPH3A;SYNPR;RPS6KA3;EFR3A;AKAP11;UBL3;TRIM2;KIF13A;PSD3;PRKACB;EDIL3;SH3GL2;PCMTD1;KCNH1;CAST;RBFOX1;ARHGEF12;DST;PRKCE;SLC2A13;TMOD2;MTUS1;ARAP2;COBL;MYRIP;SYN2;GABRG2;GABRG1;DNM3;TOM1L2;TANC1;KCNMA1;WDFY3;PLCB1;NGEF;RAPGEF4;SLC24A2;NECAB1;NFAT5;STXBP1;SEL1L;SLC1A2;NALCN;RAP1GAP;KIAA0513;GRIN2A;ABLM1;PDZD2;SV2B;SPOCK3;SPOCK1;CTNNA3;GPR158;ATP9A;OPCML;NDFIP2;ABCA5;CADM2;ATRNL1;SAMD4A;CRIM1;SLC4A10;SYT16;KIAA1549L;MYO5A;PDE4DIP;ATP2B2;SYNJ2;GNG12;ELL2;SNAP91;TTLL7;TJP1;ARHGAP32;PTPRB;DLG2;SYNJ1;PPP2R2C;RCAN2;CNTN1;CPE;SCN2A;CPEB4 |
| PLXNA2 human tf ARCHS4 coexpression | 89/299 | 4.2232694123581743E-13 | APP;DOCK4;TENM4;MYT1L;DOCK9;CTNND2;MAST2;GRIK3;PTPRM;ECE1;SIPA1L2;ROBO1;CDH4;MPRI;DPYSL5;PEG10;TRIM2;MCF2L;AKT3;PHACTR3;KIF21B;EPHB2;NEO1;PPFIA2;MAGI1;RBFOX1;RBFOX2;TMEM178B;CACNA2D1;TMOD2;AFAP1;KAZN;FRMD4A;FAM219A;NAV2;TANC2;MAPK8IP1;MPPED1;COL4A2;LRRC7;HECW2;SCN8A;KCNQ3;WDFY3;TNIK;XPR1;GRIA1;SHC3;IGSF3;STXBP1;NREP;KALRN;FAM171A1;CTIF;STOX2;GNG2;ZNF704;HECTD4;EPB41L3;GTF2IP4;MVB12B;NCAM1;CTNNA2;SRGAP3;PAK5;PLXNA4;ATP9A;MAP4K4;ARNT2;NDFIP1;AUTS2;SYT1;ST8SIA2;NTRK3;KIAA1549L;NETO2;CORO2B;DCLK1;SNAP91;SGSM1;PTPRD;SDK1;PTPRB;APC;NFIB;DLG5;TTC3;SPIRE1;APBA2                   |
| SOX6 human tf ARCHS4 coexpression   | 86/299 | 9.646149406694208E-12  | SLC44A5;SPAG16;ROBO2;SEMA5A;OSCP1;CCDC122;CHD9;GADL1;ZBTB20;SLC35F1;EFCAB6;RYR3;MYLK3;UNC80;SRGAP2C;NHSL1;DPYSL5;ZSCAN30;TRIM2;ADAMTSL3;SNAPC3;TNR;NOS1;DENND2C;WSB1;TMEM178B;LRRC49;TCF12;MAGI2;RFX3;FRMD4A;ABCC9;PIAS2;EPN2;MMP16;IFT81;ADGRB3;ASTN2;ZFPM2;ZNF234;ASTN1;CRB1;TNKS;LZP2;PDE1A;PCDH15;NRXN3;TPTE2P2;ILDR2;NOL4;MIPOL1;NPAS3;FGD4;GNG2;KIAA1328;SNTG1;FUT9;ANKRD36BP2;SRGAP3;JAM2;PAK5;GRIA4;GABRA2;RFTN2;SPEC1;ATF7IP;RIC3;ZNF462;MBD5;ANKRD26;SLC14A2;NTRK3;LSAMP;PDE4DIP;LHFPL3;ARHGAP28;DCLK1;MAPK10;CCDC88A;APC;KLHL7;TTC3;TCF4;ASB4;ASB3;CPEB4                               |
| ZNF236 human tf ARCHS4 coexpression | 86/299 | 9.646149406694208E-12  | RERE;DIDO1;SETD2;USP33;ZBTB21;SMG1P5;RORA;LYST;SYNE2;AKAP13;NIPBL;PTAR1;C16ORF72;AKAP11;HERC1;PIIP5K2;ADAMTSL3;ZNF407;RTTN;ERC1;POTEC;RBM33;MBNL1;USP7;DST;VPS13C;ARAP2;VPS13B;ARID1B;FAM153A;WDFY3;BIRC6;ASTN2;UTRN;KDM7A;CFAP61;MACF1;NFAT5;WDR26;ROCK1;KMT2C;RNF38;RGPD6;RGPD8;LPP;MIPOL1;FGD4;PCNX1;SCAF8;GRK3;ATXN1;KIAA1328;HECTD1;HECTD4;ADAMTSL17;ANKRD36BP2;HIVEP2;ATP9B;BPTF;LRRC37A3;ARFGEF1;SPEN;USP25;CREBBP;MBD5;MON2;LRBA;TRAPPC10;MGA;DENND4C;ERBIN;YLPML1;ADAM32;LNPEP;DNAJC13;ARHGAP26;SMARCA2;MYO9A;MED13L;ARHGAP32;TTLL5;DMXL2;APLF;CDK12;EIF4G3;TNRC6B                       |
| ST18 human tf ARCHS4 coexpression   | 85/299 | 2.4522380337575943E-11 | PCSK2;GABRB3;ROBO2;ERO1B;MYT1L;DGKB;ELAVL4;GRK2;EFCAB6;BICD1;CDH7;RIMS2;UNC80;DPYSL5;RASGEF1B;TRIM2;MCF2L;AKT3;HYDIN2;KIF21A;EDIL3;SH3GL2;ANKS1B;EPHA7;KCND3;DCC;LRRC49;MAGI2;MTUS2;EBF2;CDKAL1;SEZ6L;SHISA6;HECW1;KCNQ3;XPR1;SL                                                                                                                                                                                                                                                                                                                                                                  |

|                                                   |        |                            |                                                                                                                                                                                                                                                                                                                                                                                                                                                                                                                                                                    |
|---------------------------------------------------|--------|----------------------------|--------------------------------------------------------------------------------------------------------------------------------------------------------------------------------------------------------------------------------------------------------------------------------------------------------------------------------------------------------------------------------------------------------------------------------------------------------------------------------------------------------------------------------------------------------------------|
|                                                   |        |                            | C24A2;CRB1;PPM1L;TNKS;STXBP1;ATL1;BTF3L4;NRXN3;AKAP6;NREP;NYAP2;KALRN;NOL4;NALCN;MTMR7;DPP6;SNTG1;CLVS2;NCAM1;CTNNA2;CSMD3;SRGAP3;PAK3;MBD5;PTPRN2;MYEF2;CADM1;PCDH9;NTRK3;CADPS;SLC4A10;SYT16;KLHL3;SORBS2;SNAP91;TTLL7;PTPRD;MAPK10;CCDC88A;PLCXD3;NFIB;ASXL3;TTC3;CNTN1;CPE;APBA2;ASB3;CPEB4;HCN1                                                                                                                                                                                                                                                               |
| ZFPM2<br>human tf<br>ARCHS4<br>coexpressi<br>on   | 85/299 | 2.452238033<br>7575943E-11 | SLC44A5;OSCP1;CCDC122;CNTNAP2;MYT1L;DPY19L2P2;GADL1;GRIK2;EFCAB6;MYLK3;GPHN;RPH3A;UNC80;SYNPR;ADAMTS3;LRRTM4;TRIM2;ADAMTSL3;ZNF407;AKT3;PSD3;DPF3;DLGAP1;NOS1;ERC1;SOX6;DIP2C;SRGAP2B;SH3GL2;PPFIA2;POTEC;UNC13C;RBFox1;KCND3;CACNA2D1;TMOD2;KAZN;SHISA9;FAM126A;SYN2;CNKSR2;LRRC7;HECW1;KCNQ3;PLCB1;SHANK2;GRIA1;NECAB1;NLGN1;SHC3;STXBP1;KALRN;MIPOL1;STOX2;GRIN2A;HECTD1;SV2B;CECR7;CLVS2;RFPL3S;OPCML;SLC14A2;SPHKAP;GABRA6;SYT1;CADM2;ST8SIA1;INSR;NTRK3;KIAA1549L;ADAM32;PDE4DIP;ATP2B2;MYO9A;SNAP91;TTLL7;FER;NFIA;NFIB;NEDD4;TTC3;SPIRE1;SCN2A;LRP12;CPEB4 |
| ZNF385D<br>human tf<br>ARCHS4<br>coexpressi<br>on | 85/299 | 2.452238033<br>7575943E-11 | ROBO2;DPP10;CCDC122;ATP8A2;MYT1L;ANKRD36;C2ORF88;MAP3K7CL;CELF4;SLC8A1;MYLK3;RIMS2;UNC80;GRM5;GRM7;CA5A;TRIM2;ADAMTSL3;PHACTR3;DLGAP1;ANKS1B;SOX5;GARNL3;KCNH5;LRRC49;TMOD2;MAGI2;ABCC9;ANK3;SHISA9;AJAP1;CNKSR2;FRMD3;DNM3;LRRC7;HECW1;ASTN2;PLCB1;ZNF397;SLC24A2;PPM1L;ATL1;NTM;KALRN;CACNA1E;MIPOL1;GRIN2A;DPP6;KIAA1328;FLRT2;PGBD5;FUT9;CLVS2;CAMTA1;NCAM1;CSMD3;PAK3;ASIC2;MORC1;CSMD1;PLXNA4;GABBR2;RIC3;SYT1;NEGR1;CADM2;NTRK3;LSAMP;SLC4A10;SYT16;ADAM32;GRIN2B;DCLK1;PBX1;SNAP91;TTLL7;CCDC88A;AGBL4;GFI1B;DLG2;PDE10A;PPP2R2B;GNAQ;SCN2A;ASB3           |
| FOXG1<br>human tf<br>ARCHS4<br>coexpressi<br>on   | 84/299 | 6.576674901<br>778489E-11  | SLC44A5;ROBO2;TENM4;MYT1L;ANKRD36;CTNND2;GRIK3;ELAVL4;RORB;BICD1;GLI3;SYNE2;GLI2;TTC28;CDH4;NHSL1;CDH2;DPYSL5;LRRTM4;TRIM2;AKT3;LUC7L;KIF21A;SOX6;SOX5;PPFIA2;RGS7;ANKRD36C;RBFox2;LRRC49;MAGI2;RFX3;EML1;ENAH;C12ORF4;GAREM1;MPPED1;IFT81;LRRC7;HECW1;MPPED2;KCNQ3;AMPH;XPR1;ASTN1;GRIA1;CRB1;PHLPP1;SHC3;CTTNBP2;TNKS;NTM;NREP;KALRN;PHF21B;STOX2;FUT9;ZNF704;NCAM1;CTNNA2;SRGAP3;MPDZ;PAK5;PLXNA4;MYEF2;ST8SIA1;ST8SIA2;NTRK3;CORO2B;ST18;TTLL7;PTPRD;NELL2;CCDC88A;DLG2;DAB1;NFIA;NBEA;APC;NFIB;KLHL7;TTC3;RNF182;TCF4                                         |
| POU3F2<br>human tf<br>ARCHS4<br>coexpressi<br>on  | 83/299 | 1.736399602<br>0301883E-10 | SLC44A5;ROBO2;DRAXIN;TENM4;MYT1L;CTNND2;ELAVL4;LDLRAD3;ROBO1;GRM3;CDH4;DACH1;CDH2;DPYSL5;TRIM2;DNER;KIF21A;EPHB2;MAGI1;ANKRD36C;WSB1;ADGRV1;TMEM178B;DCC;LRRC49;TCF12;HUNK;RFX3;FRMD4A;MPPED1;ADGRB3;LRRC7;TNKS;CHRNA7;NTM;ILDR2;NREP;KALRN;NPAS3;PHF21B;STOX2;GTF2IP1;NKAIN3;GNG2;ZNF704;PLXNA2;CAMTA1;ZSWIM6;NCAM1;CTNNA2;SRGAP3;PAK3;JAM2;PAK5;PLXNA4;ATP9A;MAP4K4;ARNT2;MYEF2;ST8SIA1;ST8SIA2;PTCH1;NTRK3;NETO2;CORO2B;DCLK1;PBX1;ENOX1;TTLL7;PTPRD;MAPK10;NELL2;CCDC88A;FABP7;ASXL3;TTC3;YPEL1;RNF182;FAT3;TCF4;RGS12;APBA2;ADGRL2                            |
| CUX2 human<br>tf ARCHS4<br>coexpressi<br>on       | 82/299 | 4.037540535<br>965851E-10  | SLC44A5;RERE;DOCK3;TENM4;FRMPD4;MYT1L;ANKRD36;CTNND2;SLC8A1;RPH3A;CDH4;ZNF608;GRM7;DPYSL5;TRIM2;MCF2L;PHACTR3;KIF21A;DLGAP1;KIF21B;NEO1;PPFIA2;ANKRD36C;RBFox1;RBFox2;KCNH5;TMEM178B;CACNA2D1;TMOD2;ANK3;MYRIP;SYN2;MAPK8IP1;MPPE1;LRRC7;SCN8A;ARHGEF7;DSCAML1;NGEF;SHANK2;ASTN1;SHC3;CTTNBP2;STXBP1;KALRN;CTIF;SV2B;FUT9;ZNF704;HECTD4;PLXNA2;CLVS2;NCAM1;CTNNA2;SRGAP3;PAK5;ATP9A;GABBR2;ARNT2;AUTS2;SYT1;CADM2;NTRK3;KIAA1549L;MYO5A;ATP2B2;GRIN2B;CORO2B;DCLK                                                                                                  |



|                                                  |        |                           |                                                                                                                                                                                                                                                                                                                                                                                                                                                                                                                                                                                                                            |
|--------------------------------------------------|--------|---------------------------|----------------------------------------------------------------------------------------------------------------------------------------------------------------------------------------------------------------------------------------------------------------------------------------------------------------------------------------------------------------------------------------------------------------------------------------------------------------------------------------------------------------------------------------------------------------------------------------------------------------------------|
|                                                  |        |                           | 1; PBX1; SNAP91; PTPRD; DLG2; NBEA; APC; PPP2R2C; PPP2R2B; ASXL3; FAT3; TCF4; SCN2A; APBA2                                                                                                                                                                                                                                                                                                                                                                                                                                                                                                                                 |
| GLIS3<br>human tf<br>ARCHS4<br>coexpressi<br>on  | 82/299 | 4.037540535<br>965851E-10 | SPAG16; APP; NRP1; ERO1B; TRIO; TENM3; MAML2; TUSC3; WWC1; PTPRM; ZBTB20; ECE1; FMN2; SLC4A4; IGF1R; SCGN; C10RF127; ALCAM; CDH2; PEG10; HYDIN; TEAD1; NEO1; DST; IL1R1; ABCC8; ANXA4; FNDC3B; AFAP1; RFX3; ARID5B; FNDC3A; NAV2; STON1; GTF2A1L; TANC2; PARD3B; EVC; HEATR5A; KCNMA1; MYO3A; MXRA7; DOCK1; CD44; CHST3; RAI14; SDC2; ARHGEF28; DNAH5; SEL1L; DNAH6; RGPDP6; FSTL1; SLC7A2; THSD4; NPAS3; ERICH5; ARSJ; SNX9; TSPAN3; MPDZ; ARSB; MAP4K4; NTRK2; STARD13; VCAM1; NEK6; PXDNL; LAMB1; GNG12; CDC42BPA; ELL2; TJP1; IGSF11; MOB1B; SDK1; RCAN1; PLCXD3; TTC6; COL5A1; DLG5; STT3A; CPE                       |
| ZNF536<br>human tf<br>ARCHS4<br>coexpressi<br>on | 82/299 | 4.037540535<br>965851E-10 | MYT1L; DGKB; CTNND2; PTPRO; GRIK3; ELAVL4; GPHN; ROB1; GRM3; DPYSL5; TRIM2; DNER; PSD3; PHACTR3; KIF21A; DLGAP1; WSB1; RBFOX2; KCND3; TMEM178A; LRRC49; TMO2; RFX3; ANK3; DNM3; NRG3; ADGRB3; LRRC7; HECW1; MPPED2; AMPH; RAPGEF5; TOX; ASTN1; GRIA1; RTN1; STXB1; PDE1A; ATL1; BTF3L4; NRXN3; ILDR2; AKAP6; NREP; KALRN; NOL4; HDAC9; STOX2; MAPK8; GNG2; CLVS2; APBB2; NCAM1; CTNNA2; SRGAP3; PAK5; GRIA4; GABRA2; ATF7IP; ARNT2; ZNF462; MYEF2; AUTS2; SYT1; PCDH9; ST8SIA2; LSAMP; DCLK1; PBX1; ENOX1; TTLL7; PTPRD; MAPK10; NELL2; CDC88A; LRFN5; APC; KLHL7; TTC3; FAT3; TCF4; APBA2                                 |
| ZNF638<br>human tf<br>ARCHS4<br>coexpressi<br>on | 82/299 | 4.037540535<br>965851E-10 | GABRB1; DOCK3; ATP8A1; DOCK9; CTNND2; DPY19L2P2; OSBPL10; UNC80; PTAR1; HERC2; C16ORF72; AKAP11; HERC1; ZSCAN30; PPIP5K2; TRIM2; SACS; DIP2B; EDIL3; PPF1A2; KCNH1; UNC13C; VWFP1; ARHGEF12; DST; VPS13C; TMO2; VPS13B; WDR72; ANK3; UNC5D; ZDHHC17; ARID1B; PIAS2; DNM3; HEATR5A; HECW2; WDFY3; BIRC6; RAPGEF5; PLCB1; ASTN1; SLC24A2; MACF1; NFAT5; TNKS; KMT2C; HERC2P3; AKAP6; ZDHHC21; KALRN; MIPOL1; PCNX1; RANBP3L; KIAA1328; HECTD1; FUT9; HECTD4; SPOCK3; TRPM7; ATP9B; BPTF; MBD5; MON2; PCDH9; CADM2; ST8SIA1; ATRNL1; LRB1; MGA; NTRK3; SYT16; PHC3; MYO9A; LRP1B; TJP1; DLG2; POLR3A; APC; FAT3; PTPN4; ASB3  |
| HEHZ human<br>tf ARCHS4<br>coexpressi<br>on      | 82/299 | 4.037540535<br>965851E-10 | SETD2; USP32; DOCK8; SMG1P2; RORA; LYST; MYSM1; SYNE2; DOCK10; AKAP13; NIPBL; PTAR1; C16ORF72; HERC1; ZNF407; THSD7A; RBM33; MBNL1; PRKCH; ARHGEF12; ITGA4; DST; VPS13C; ARAP2; ADAM10; VPS13B; ARID1B; PARP8; INPP4B; WDFY3; BIRC6; PIK3C3; UTRN; DOCK2; MCTP2; KDM7A; MACF1; NFAT5; WDR26; ROCK1; KMT2C; ITPR2; LPP; RASGRP1; PCNX1; SCAF8; BTAFL1; KIAA1328; HECTD1; HECTD4; TRPM7; HIVEP2; BPTF; MAP2K6; ARFGEF1; USP24; SPEN; CREBBP; RABGAP1L; MBD5; MON2; KDM4C; ARPP21; LRBA; TRAPPC10; MGA; DENND4C; ERBIN; YLPM1; ADAM32; LNPEP; DNAJC13; SMARCA2; PHC3; MYO9A; GATAD2B; MED13L; KANS1; SLMAP; SP3; CDK12; UNC79 |
| ZMAT3<br>human tf<br>ARCHS4<br>coexpressi<br>on  | 81/299 | 1.009857816<br>8621822E-9 | SEMA5A; APP; RNF11; TRIO; ANKRD33B; PTPRM; ECE1; ANTXR1; SLC8A1; GALNT10; ADAMTSL1; TRIM9; SPRED1; AKAP11; SH3PXD2A; RPS6KA2; PSD3; SACS; TEAD1; PAMR1; EDIL3; KCNH1; ARHGEF12; DST; TMO2; FNDC3B; AFAP1; FRMD6; EVC; COL4A2; HECW2; KCNMA1; CDC42EP3; WDFY3; MXRA7; DOCK1; DGKI; CHST3; DDR2; MACF1; NFAT5; SHC3; ROCK1; TWIST2; TMTC1; NLK; FSTL1; TRHDE; LTBP1; CTIF; ATXN1; ARSJ; SNX25; MGAT5; CLVS2; SPOCK1; ATP9A; MAP4K4; NTRK2; STARD13; EGLN3; CADM2; NEK6; RFTN1; NEK7; SAMD4A; CRIM1; SYT16; MYO5A; CYBRD1; LAMB1; GNG12; DCLK1; EXT1; ARHGAP31; COL5A1; FAT1; ITGBL1; SPIRE1; RGL1; FBN1                      |
| PBRM1<br>human tf<br>ARCHS4<br>coexpressi        | 81/299 | 1.009857816<br>8621822E-9 | SLC44A5; SETD2; TENM4; ANKRD36; CHD9; ELAVL4; BICD1; SYNE2; PTPRG; ROBO1; VN1R7P; GRIP1; NIPBL; ZNF608; HERC1; ZNF407; SACS; SMARCA1; THSD7A; GTF2I; RBFOX2; DCC; LRRC49; VPS13C; VPS13B; FRMD4A; ZDHHC17; ARID1B; PARD3B; ASPM; NCOR1; MMP16; RFX7; WDFY3; BIRC6;                                                                                                                                                                                                                                                                                                                                                         |

|                                                  |        |                           |                                                                                                                                                                                                                                                                                                                                                                                                                                                                                                                     |
|--------------------------------------------------|--------|---------------------------|---------------------------------------------------------------------------------------------------------------------------------------------------------------------------------------------------------------------------------------------------------------------------------------------------------------------------------------------------------------------------------------------------------------------------------------------------------------------------------------------------------------------|
| on                                               |        |                           | PIK3C3;UTRN;XPR1;MACF1;ROCK1;STAU2;TNKS;KMT2C;IREB2;RASAL2;NREP;PHF21B;MAPK8;KIAA1328;ZNF704;ZSWIM6;NCAM1;PAK3;MAP4K4;BPTF;ARFGEF1;USP24;ATF7IP;ZNF462;MBD5;MYEF2;BCL11B;AUTS2;ST8SIA2;MGA;YLPM1;SYT14;PPP2R3A;MYO9A;PBX1;GATAD2B;MED13L;PLEKHA8;PTPRD;FER;APC;KANSL1;ASXL3;TTC3;TCF4;EIF4G3                                                                                                                                                                                                                        |
| POU3F3<br>human tf<br>ARCHS4<br>coexpressi<br>on | 80/299 | 2.431680156<br>2333346E-9 | DRAXIN;TENM4;MYT1L;CTNND2;ELAVL4;ZBTB20;ROBO1;TRIM9;CDH4;ZNF608;CDH2;DPYSL5;PEG10;TRIM2;AKT3;DNER;KIF21A;KIF21B;ERC2;PPFIA2;RBFOX2;TMEM178B;TMOD2;RFX3;KAZN;FRMD4A;ANK3;SORCS3;MPPED1;LRRC7;ADGRB1;TNIK;ASTN1;GRIA1;SHC3;STAU2;ILDR2;NREP;KALRN;NPAS3;PHF21B;FAM171A1;STOX2;GTF2IP1;GNG2;CDH20;FUT9;ZNF704;PLXNA2;CAMTA1;NCAM1;CTNNA2;SRGAP3;ZNF423;PAK5;PLXNA4;ATP9A;ARNT2;NTRK2;NDFIP1;MYEF2;AUTS2;ST8SIA2;NTRK3;GRIN2B;CORO2B;DCLK1;TTLL7;PTPRD;MAPK10;CCDC88A;DLG2;APC;SMOC1;TTC3;ZNF536;FAT3;TCF4;RGS12;APBA2  |
| NCOA1<br>human tf<br>ARCHS4<br>coexpressi<br>on  | 80/299 | 2.431680156<br>2333346E-9 | ATP8A1;CPQ;DOCK8;DYSF;RORA;FRY;LYST;RYR3;SYNE2;UNC80;SENP6;AKAP13;GLT1D1;RASSF2;AKAP11;HERC1;ADGRE3;KIF21B;DIP2B;ANKS1B;MAP3K5;RBFOX1;MBNL1;PRKCB;VPS13C;TMOD2;ARAP2;VPS13B;ANK3;FAM126B;IPCEF1;IL17RA;PARP8;CNKSR2;ITPKB;MADD;RAPGEF2;WDFY3;PLCB1;UTRN;DOCK2;MCTP2;KDM7A;SLC24A2;MACF1;MTMR3;KMT2C;AOAH;KALRN;KIAA0513;GRIN2A;PCNX1;ATXN1;HECTD4;MAPK1;HIVEP2;LYN;GABBR2;CREBBP;IQSEC1;PLCL1;ERBIN;MYO5A;PDE4DIP;LNPAP;ATP2B2;FOXN3;ARHGAP26;SMARCA2;PHC3;GRIN2B;MYO9A;MED13L;DLG2;SYNJ1;APC;GNAQ;DMXL2;FAT3;PTPN4 |
| ZMAT4<br>human tf<br>ARCHS4<br>coexpressi<br>on  | 80/299 | 2.431680156<br>2333346E-9 | GABRB3;DPP10;DOCK3;ATP8A1;FRMPD4;MYT1L;DGKB;CTNND2;OTUD7A;CELF4;ZBTB20;GRIK1;C4ORF50;GRM5;CDH2;PEG10;TRIM2;DNER;KIF21A;DLGAP1;KCNH1;POU1F1;TMEM178B;TMEM178A;KCNH8;TMOD2;PGM2L1;FOXP2;PJA2;AJAP1;ADGRB3;DOK5;SCN8A;HECW1;TNIK;DGKI;CDH18;MAGEL2;KHDRBS2;NLGN1;RTN1;SHC3;BTF3L4;RNF8;KLHL13;NREP;MTMR7;CECR2;GRIN2A;DPP6;FUT9;CLVS2;CAMTA1;DPH6;NCAM1;STXBP6;PAK3;ATP9A;GRIA4;ARNT2;ZNF462;SYT1;PCDH9;CADM2;ATRN1;TMEI132B;NTRK3;PCDH7;PBX3;LSAMP;KLHL1;ESRRG;DCLK1;TTLL7;PTPRD;IGSF11;RALYL;PPP2R2B;SCN2A;ADGRL2    |
| SMAD4<br>human tf<br>ARCHS4<br>coexpressi<br>on  | 79/299 | 5.543374746<br>019774E-9  | PATJ;TENM4;ZFYVE9;XYLT1;PTPRM;MYSM1;SYNE2;PTPRG;AKAP13;NIPBL;PTAR1;HERC2;ZNF608;C16ORF72;AKAP11;HERC1;KIF13A;SACS;DIP2B;TEAD1;NEO1;GTF2I;UNC13B;CADPS2;ARHGEF12;DST;VPS13C;ADAM10;VPS13B;ELF2;WDFY3;BIRC6;UTRN;DOCK1;KDM7A;NOTCH2;MACF1;NFAT5;WDR26;KMT2C;IREB2;ZDHHC21;LPP;CECR2;PCNX1;SCAF8;BTAF1;HECTD1;HECTD4;MPDZ;BPTF;ARFGEF1;USP24;SVIL;CREBBP;MON2;LRBA;TRAPPC10;MGA;DENND4C;ERBIN;LNPEP;DNAJC13;FOXN3;PUM1;PTPN13;MYO9A;MTOR;MED13L;PLEKHA8;TJP1;ITCH;SLMAP;AGO2;SP3;FAT1;PKN2;ADGRL2;FGF10                |
| ZNF540<br>human tf<br>ARCHS4<br>coexpressi<br>on | 79/299 | 5.543374746<br>019774E-9  | PCSK2;ZNRFP2P2;MYT1L;DGKB;ELAVL4;FRG1HP;CDH8;UNC80;SCGN;DPYSL5;TRIM2;RNF17;KIF21A;RALGPS1;ANKS1B;RGS7;ZNF287;EPA7;TANGO6;WSB1;LRRC49;TMOD2;MAGI2;RFX3;SEZ6L;GABRG2;ITFG1;PJA2;ADGRB3;LRRC7;HECW1;MAPRE2;ZNF675;CDH18;ASTN1;ZNF112;GRIA1;STX12;MAGEL2;RTN1;STOML1;STXBP1;ATL1;NRXN3;RGPD5;NREP;NYAP2;NOL4;MTMR7;RIC8B;GNG2;SNTG1;SPOCK3;CTNNA2;CSMD3;SRGAP3;PAK3;GRIA4;CCDC178;PTPRN2;CADM1;CADM2;ST8SIA2;LSAMP;SLC4A10;SYT16;SGCZ;MAPK10;AGBL4;LRFN5;APC;ASXL3;TTC3;CNTN1;PARGP1;CNTN4;SCN2A;FSIP1;SSBP2            |

|                                                   |        |                           |                                                                                                                                                                                                                                                                                                                                                                                                                                                                                                                                                                               |
|---------------------------------------------------|--------|---------------------------|-------------------------------------------------------------------------------------------------------------------------------------------------------------------------------------------------------------------------------------------------------------------------------------------------------------------------------------------------------------------------------------------------------------------------------------------------------------------------------------------------------------------------------------------------------------------------------|
| ZNF407<br>human tf<br>ARCHS4<br>coexpressi<br>on  | 79/299 | 5.543374746<br>019774E-9  | DOCK5;SETD2;ATP8A1;DOCK8;SMG1P2;SMG1P5;GRIK2;<br>FRY;BACH1;LYST;SYNE2;DOCK10;AKAP13;NIPBL;HERC<br>2;C16ORF72;PPIP5K2;DIP2B;JAK2;PCMTD1;MAP3K5;R<br>BM33;MBNL1;ITGA4;DST;VPS13C;ARAP2;VPS13B;PARP<br>8;PHF20L1;NCOR1;DPYD;RELL1;WDFY3;BIRC6;ZFPM2;<br>UTRN;DOCK2;MCTP2;KDM7A;NOTCH2;MACF1;NFAT5;MTM<br>R3;WDR26;ROCK1;KMT2C;ITPR2;IQGAP1;PCNX1;SCAF8<br>;KIAA1328;HECTD1;HECTD4;HIVEP2;ATP9B;ARFGEF1;<br>USP24;USP25;CREBBP;MON2;KDM4C;LRBA;TRAPPC10;M<br>GA;DENND4C;ERBIN;LNPEP;DNAJC13;ARHGAP26;SMARC<br>A2;MYO9A;MED13L;KANSL1;DMXL2;SP3;CCSER1;CDK12<br>;KIAA0825          |
| ZNF804A<br>human tf<br>ARCHS4<br>coexpressi<br>on | 79/299 | 5.543374746<br>019774E-9  | ROBO2;DRAXIN;PPP1R17;TENM4;MYT1L;ANKRD36;CHD9<br>;CTNND2;PTPRO;ELAVL4;CDH9;CMIP;RPH3A;CDH4;GRM<br>7;DPYSL5;ZSCAN30;TRIM2;DNER;DLGAP1;ZNF385D;PR<br>KACB;ZNF521;ANKS1B;CALN1;SOX5;PPF1A2;RBFOX2;K<br>CNH5;TMEM178B;DCC;CACNA2D1;LRRC49;TMOD2;SORCS<br>1;ANK3;UNC5D;ZDHHC17;TIAM2;LRRC7;IL1RAPL2;CDC<br>42EP3;IL1RAPL1;DSCAML1;NLGN1;AKAP6;NREP;KALRN<br>;NKAIN2;NEU3;STOX2;GRK3;MAPK8;FUT9;PLXNA2;CLV<br>S2;ZSWIM6;NCAM1;CTNNA2;SRGAP3;ZSWIM5;PAK5;PLX<br>NA4;CLVS1;NTRK3;GRIN2B;DCLK1;SNAP91;PTPRD;NEL<br>L2;CCDC88A;FER;DLG2;NFIA;APC;PPP2R2B;COL5A3;T<br>TC3;LRP12          |
| CHD9 human<br>tf ARCHS4<br>coexpressi<br>on       | 79/299 | 5.543374746<br>019774E-9  | DPP10;ANKRD36;USP33;FRG1HP;ZBTB20;EFCAB6;SYNE<br>2;SENP6;SRGAP2C;CNST;PPIP5K2;LRRTM4;TRIM2;ADA<br>MTSL3;AKT3;DLEU1;KIF21A;SOX6;SCAPER;SRGAP2B;G<br>ABPA;ANKS1B;ANKRD36C;WSB1;DST;GRID1;LRRC49;KC<br>NH8;VPS13C;MAGI2;VPS13B;ARID1B;PIAS2;PCCA;IFT<br>81;PEAK1;MPPED2;ZNF438;USP41;ASTN2;ZNF675;ANK<br>RD36B;SDCCAG8;CRB1;STXBP4;KMT2C;RGPD6;RGPD5;R<br>ASAL2;MIPOL1;FGGY;KIAA1328;SNTG1;TTC21B;ANKRD<br>36BP2;PAK3;LRRC4C;ATP9B;JAM2;BPTF;PRELID2;MBD<br>5;ATP8B4;SLC14A2;MYEF2;CDC42BPA;CCDC1;MAPK10;<br>CCDC88A;FER;APC;NEDD4;TTC3;CEP83;TCF4;SSBP2;A<br>SB3;ZNF354C;TNRC6B |
| SOX9 human<br>tf ARCHS4<br>coexpressi<br>on       | 78/299 | 1.232531226<br>5316335E-8 | APP;TENM4;CTNND2;WWC1;ZBTB20;SLC35F1;PTPRK;SL<br>C4A4;GLI3;CMIP;KIF15;SPRED2;GRM5;CDH2;TRIM2;K<br>IF21A;EPHB2;NEO1;SRGAP2B;ANKRD6;MAGI1;COL27A1<br>;ADGRV1;TMEM178B;TCF12;RFX3;SLC6A11;SEZ6L;SOR<br>CS2;PAR3B;EPN2;PYGO1;ASPM;ADGRB3;PAR3;MPPED<br>2;CHST3;CREB5;NFAT5;PHLPP1;SHC3;NTM;ILDR2;ASA<br>P2;NPAS2;NPAS3;STOX2;RELN;ZNRF3;ZNF704;LRIG1;<br>APBB2;SRGAP3;MPDZ;JAM2;MAP4K4;RFTN2;ARNT2;ZNF<br>462;FARP1;NTRK2;DTNA;MYEF2;AUTS2;SGTB;PTCH1;H<br>MGA2;BTBD9;CORO2B;PTK2;ARHGAP32;NFIA;FABP7;SM<br>OC1;DLG5;FAT1;RNF182;SPIRE1                                           |
| ZNF91<br>human tf<br>ARCHS4<br>coexpressi<br>on   | 78/299 | 1.232531226<br>5316335E-8 | SLC44A5;ROBO2;SETD2;MYT1L;ANKRD36;CHD9;PTPRO;<br>ELAVL4;ZBTB20;SMG1P5;EFCAB6;UNC80;GRM7;PPIP5K<br>2;TRIM2;AKT3;TMEM108;TLK1;KIF21A;SOX6;PCMTD1;<br>EPHA6;WSB1;DST;LRRC49;SEMA6D;TMOD2;MAGI2;RFX3<br>;ANK3;FAM126B;TANC2;PJA2;NAV3;LRRC7;ASTN2;XPR<br>1;ANKRD36B;TNKS;NRXN3;AKAP6;RASAL2;NREP;NYAP2<br>;KALRN;NOL4;MIPOL1;FGD4;MAPK8;GNG2;SNTG1;FUT9<br>;ZNF627;SRGAP3;PAK3;PLXNA4;MBD5;NTRK3;RANBP17<br>;SYT16;GRIN2B;PTPRD;MAPK10;CCDC88A;DLG2;NBEA;<br>APC;KLHL7;ASXL3;TTC3;FAT3;CCSER1;TCF4;PTPN4;S<br>SBP2;ASB3;CPEB4;TNRC6B                                              |
| ZNF25<br>human tf<br>ARCHS4<br>coexpressi<br>on   | 78/299 | 1.232531226<br>5316335E-8 | GABRB1;ATP8A1;MYT1L;CTNND2;ELAVL4;TRIM9;DPYSL<br>5;TRIM2;DNER;PSD3;DLGAP1;PRKACB;RALGPS1;PPF1A<br>2;RBFOX1;WSB1;RBFOX2;TMEM178B;TMEM178A;CACNA2<br>D1;TMOD2;FRMD4B;SYN2;GABRG2;PGM2L1;PJA2;DNM3;<br>ADGRB3;ULK2;AMPH;ZMYND11;VSTM2A;ASTN1;GRIAL;<br>R TN1;STXBP1;ATL1;NRXN3;AKAP6;NREP;PRKCZ;KALRN;<br>NALCN;DPP6;GNG2;SV2B;CDH20;FUT9;CLVS2;NCAM1;<br>CTNNA2;PAK3;ATP9A;OPCML;GABRA2;ARNT2;NDFIP1;SY                                                                                                                                                                         |

|                                     |        |                       |                                                                                                                                                                                                                                                                                                                                                                                                                                                                                                                  |
|-------------------------------------|--------|-----------------------|------------------------------------------------------------------------------------------------------------------------------------------------------------------------------------------------------------------------------------------------------------------------------------------------------------------------------------------------------------------------------------------------------------------------------------------------------------------------------------------------------------------|
|                                     |        |                       | T1;CADM2;ST8SIA2;PBX3;SLC4A10;SYT16;ATP2B2;DCLK1;SNAP91;TTLL7;MAPK10;DLG2;APC;PPP2R2B;RCAN2;TTC3;YPEL1;CNTN1;SCN2A;SSBP2;APBA2                                                                                                                                                                                                                                                                                                                                                                                   |
| ZNF532 human tf ARCHS4 coexpression | 78/299 | 1.2325312265316335E-8 | GABRB3;DRAXIN;TENM3;TENM4;CTNND2;GRIK3;ELAVL4;PSIP1;BICD1;PTPRG;GLI2;ROBO1;IGF1R;ZNF608;CDH2;DPYSL5;TRIM2;AKT3;DIP2C;LARGE1;NEO1;MAGI1;WSB1;RBFOX2;TMEM178B;DCC;CACNA2D1;RFX3;FRMD4A;NAV2;ENAH;ADGRB3;LRRC7;ASTN1;SHC3;CTTNBP2;TNKS;ILDR2;AKAP6;ADCY2;RASAL2;NREP;KALRN;NPAS3;FAM171A1;STOX2;CECR2;ZNF704;LRIG1;NCAM1;CTNNA2;SRGAP3;CSMD2;ZNF423;MPDZ;WASF3;ARNT2;ZNF462;FARP1;MYEF2;AUTS2;PTCH1;NTRK3;YLP1;PTPN13;CORO2B;DCLK1;PBX1;PTK2;GULP1;TJP1;PTPRD;KLHL7;DLG5;TTC3;FAT3;TCF4;ADGRL2                      |
| TUB human tf ARCHS4 coexpression    | 78/299 | 1.2325312265316335E-8 | GABRB3;APP;CNTNAP2;GALNT13;ATP8A2;DOCK3;MYT1L;CTNND2;RPH3A;TRIM9;GRM5;DPYSL5;TRIM2;MCF2L;AKT3;PSD3;TNR;KIF21A;DLGAP1;SH3GL2;PPFIA2;RBFOX2;TMEM178B;TMEM178A;TMOD2;KAZN;FAM219A;SEZ6L;SYN2;MAPK8IP1;LRRC7;SCN8A;DSCAML1;SHANK2;ASTN1;RTN1;SHC3;CTTNBP2;TNKS;STXBP1;NTM;NREP;KALRN;NOL4;CTIF;STOX2;SV2B;CLVS2;CAMTA1;NCAM1;CTNNA2;ATP9A;WASF3;OPCML;ARNT2;NDFIP1;MYEF2;SYT1;CADM2;NTRK3;LSAMP;KIAA1549L;ATP2B2;CORO2B;DCLK1;SNAP91;PTPRD;MAPK10;DLG2;NBEA;APC;PPP2R2C;PPP2R2B;RCAN2;TTC3;CNTN1;SCN2A;APBA2         |
| DZIP1 human tf ARCHS4 coexpression  | 78/299 | 1.2325312265316335E-8 | APP;SH3GL3;TENM3;TENM4;CPNE4;CTNND2;FMN2;SIPA1L2;PTPRG;ROBO1;ZNF608;CDH2;TRIM2;AKT3;PSD3;SACS;KIF21A;TEAD1;NEO1;MAGI1;RBFOX2;TMEM178B;DST;TMOD2;EML1;ZDHHC17;MAPK8IP1;ENAH;PYGO1;DOK5;PEAK1;MXRA7;DOCK1;RAI14;RABGAP1;SHC3;RGPD6;ILDR2;FSTL1;EHBP1;NPAS3;FAM171A1;CTIF;STOX2;FRLRT2;ZNF704;NCAM1;CTNNA2;SRGAP3;ZNF423;GPC6;MPDZ;ATP9A;WASF3;ARNT2;FARP1;MYEF2;AUTS2;NTRK3;RDX;KIAA1549L;HMG2A;PTPN13;CDC42BPA;MYO9A;CORO2B;DCLK1;PLEKHA8;TTLL7;PTPRD;CCDC88A;TTLL5;FER;SPIRE1;FAT3;EIF4G3;ADGRL2;TBATA           |
| ETV1 human tf ARCHS4 coexpression   | 77/299 | 2.556655119321648E-8  | GABRB3;PPP1R17;GALNT13;DOCK3;MTCL1;MEGF11;CTNND2;LDLRAD3;RORB;PCMTD2;RPH3A;SRGAP2C;TRIM9;TRIM2;MCF2L;DNER;PSD3;TNR;DLGAP1;SRGAP2B;SH3GL2;MAGI1;CADPS2;KCND2;KCND3;TMEM178A;DCC;SEMA6D;TCF12;TMOD2;RFX3;SEZ6L;SYN2;PIAS2;MAPK8IP1;EPN2;CNKSR2;TIAM1;ADGRB3;ADGRB1;ASTN1;NLGN1;PHLPP1;SHC3;STXBP1;BTF3L4;ILDR2;DPP6;SV2B;SNTG1;FUT9;LRIG1;CLVS2;SPOCK1;GPR158;SLC15A5;WASF3;GRIA4;BBS2;RFTN2;ARNT2;PTPRN2;DTNA;MYEF2;GABRA6;SYT1;CADM2;ATP2B2;CORO2B;SNAP91;IGSF11;MAPK10;APC;SMOC1;CNTN1;SPIRE1;APBA2             |
| NFIB human tf ARCHS4 coexpression   | 77/299 | 2.556655119321648E-8  | SLC44A5;CNTNAP3;CNTNAP2;ATP8A2;MYT1L;GRIK3;GRK2;BICD1;CDH7;SRGAP2C;NHSL1;ADAMTS3;LRRTM4;AKT3;TMEM108;PHACTR3;HYDIN2;THSD7A;SRGAP2B;SH3GL2;SOX5;GARNL3;PPFIA2;RGS7;EPHA7;ZNF160;KAZN;PRKCA;EML1;TIAM2;ADGRB3;LRRC7;MPPED2;KCNQ3;RAPGEF2;ZFPM2;ZNF234;XPR1;SHANK2;GRIA1;SLC24A2;CTTNBP2;TNKS;EFNA5;NOL4;CACNA1E;PLXNA2;ANKRD20A5P;PAK3;OPCML;CA10;MYEF2;BCL11B;ARPP21;INSR;NTRK3;SLC4A10;SORBS2;SYT14;PPP2R3A;CORO2B;ST18;SNAP91;SGSM1;CCDC88A;NELL1;DLG2;DAB1;SLCO3A1;NBEA;ASXL3;TTC3;TCF4;ASB4;FGF12;LRP12;UNC79 |
| PBX3 human tf ARCHS4 coexpression   | 77/299 | 2.556655119321648E-8  | DPP10;DRAXIN;TENM3;ATP8A1;TUSC3;GRIK1;GRIK2;BICD1;CDH8;PTPRG;ROBO1;DACH1;CDH2;DPYSL5;PEG10;TRIM2;DNER;DIRC3;ZNF521;RALGPS1;MAGI1;RBFOX2;TMEM178B;DCC;CACNA2D1;LRRC49;MAGI2;EBF1;EBF2;GFRA1;PGM2L1;FOXP2;PJA2;ADGRB3;NME7;LRRC7;DOK5;TOX;XPR1;CNTNAP5;KHDRBS2;RTN1;GREB1L;KLHL13;NREP;KALRN;STOX2;MAPK8;GNG2;ZMAT4;MVB12B;NC                                                                                                                                                                                      |

|                                                   |        |                          |                                                                                                                                                                                                                                                                                                                                                                                                                                                                                                           |
|---------------------------------------------------|--------|--------------------------|-----------------------------------------------------------------------------------------------------------------------------------------------------------------------------------------------------------------------------------------------------------------------------------------------------------------------------------------------------------------------------------------------------------------------------------------------------------------------------------------------------------|
|                                                   |        |                          | AM1;CTNNA2;CSMD3;PAK3;PAK5;ATF7IP;CA10;NDFIP1;MYEF2;CNTN5;AUTS2;ST8SIA2;KLHL1;DCLK1;ARHGAP24;ENOX1;PTPRD;MAPK10;RALYL;FER;KLHL7;ASXL3;TTC3;KIAA1958;SSBP2;APBA2                                                                                                                                                                                                                                                                                                                                           |
| ZBTB38<br>human tf<br>ARCHS4<br>coexpressi<br>on  | 77/299 | 2.556655119<br>321648E-8 | LPGAT1;TRIO;ANKRD33B;DOCK9;PTPRM;EFCAB14;PTPRK;IKZF2;LIMD1;GALNT10;EPS8;AKAP13;EFR3A;AKAP11;SH3PXD2A;KIF13A;SAMD12;TEAD1;CAST;MBNL1;MBNL2;ARHGEF12;DST;IL1R1;ANXA4;VPS13C;FNDC3B;KIAA1217;FRMD6;EVC;TRAF3;KCNMA1;CMPK1;ITGA8;MET;DDR2;MACF1;NFAT5;ARHGEF28;SEL1L;TMTC1;IQGAP1;LPP;ATXN1;IGLV2-14;ARSJ;SNX25;MGAT5;BTLA;SPOCK1;SNX9;HIVEP2;STARD13;NEK6;RFTN1;NEK7;SAMD4A;ERBIN;CRIM1;CYBRD1;CABLES1;LNPEP;DNAJC13;LAMB1;SYNJ2;GNG12;SMARCA2;ELL2;EXT1;MYO1D;MYO1E;PPFIBP1;DPY19L1;SLMAP;FAT1;ATP13A3;FBN1 |
| ZKSCAN1<br>human tf<br>ARCHS4<br>coexpressi<br>on | 77/299 | 2.556655119<br>321648E-8 | PCSK2;SPAG16;CCDC122;ERO1B;ANKRD36;TUSC3;CHD9;ELAVL4;ZBTB20;PCMTD2;UNC80;RPS6KA5;PPIP5K2;CA5A;TRIM2;ADAMTSL3;GATAD1;LONP2;LUC7L;KIF21A;SOX6;MAGI1;ANKRD36C;WSB1;TCF12;MAGI2;HUNK;RFX3;COBL;ARID1B;TANC2;EPN2;PLCB4;EVC;IFT81;PEAK1;CNKSR3;WDPCP;ASTN2;ANKRD36B;ZNF397;STXBP4;RGPD5;RASAL2;HERC2P9;NOL4;NALCN;LPP;MIPOL1;NPA S3;FGD4;KIAA1328;SRGAP3;PAK3;ZNF462;FARP1;MBD5;SLC14A2;PTPRN2;MYEF2;CADM1;CADPS;C1ORF21;SORBS2;PUM1;ST18;DCDC1;CCDC88A;TMEM116;NEDD4;TTC3;CPE;ASB4;RGS12;ASB3;XKR6;TNRC6B     |
| TBX20<br>human tf<br>ARCHS4<br>coexpressi<br>on   | 77/299 | 2.556655119<br>321648E-8 | PHOD3;COL18A1;RYR2;MYOM1;PTPRM;LDB3;SIPA1L2;SLC8A1;MYLK3;AKAP13;ARHGAP42;CDH2;KIF13A;MYO18B;DPF3;PGM5;TEAD1;ADAMTS9;PDK1;MLIP;CERS6;TPM1;MTUS2;TOM1L2;TANC1;COL4A2;COL21A1;SLC27A6;ALPK3;MXRA7;ALPK2;TLN2;PPP1R12B;DGKI;ITGA9;YAP1;FBN2;PRKAA2;TMTC1;CACNA1C;LTBP1;THSD4;ABLM1;INPP5A;MGAT5;TNNI1;CTNNA3;SLIT3;B4GALNT3;PD LIM5;MPDZ;CORIN;PLXNA4;SVIL;SPHKAP;CNTN5;NEBL;PCDH7;NEK7;EXOC6B;MICAL3;SAMD4A;FAM189A2;PDE4DIP;SORBS2;PXDNL;LAMB1;MCC;PTPN13;TJP1;PLCXD3;BMP2;COL5A1;DLC1;SLMAP;PDE3A;TACC2    |
| CAMTA1<br>human tf<br>ARCHS4<br>coexpressi<br>on  | 77/299 | 2.556655119<br>321648E-8 | GABRB3;PTPRT;ATP8A2;DOCK3;MYT1L;CTNND2;CELF4;ELAVL4;RPH3A;RIMS1;GRM5;TRIM2;PSD3;KIF21A;DLGAP1;ZNF385D;ANKS1B;PPFIA2;RBFOX1;TMEM178B;TME M178A;TMOD2;KAZN;ANK3;SYN2;GABRG2;PGM2L1;AJAP1;CNKSR2;DNM3;SCN8A;HECW1;NOS1AP;ASTN1;SLC24A2;RTN1;SHC3;STXBP1;ATL1;NTM;NRXN3;KALRN;STOX2;GRIN2A;DPP6;PGBD5;SV2B;FUT9;CLVS2;NCAM1;CTNNA2;SRGAP3;PAK3;PAK5;ATP9A;WASF3;OPCML;GABBR2;ARNT2;SYT1;CADM2;NTRK3;LSAMP;KIAA1549L;ATP2B2;DCLK1;PBX1;SNAP91;TTLL7;PTPRD;MAPK10;RALYL;DLG2;PPP2R2C;PPP2R2B;RCAN2;SCN2A        |
| AFF4 human<br>tf ARCHS4<br>coexpressi<br>on       | 77/299 | 2.556655119<br>321648E-8 | APP;TRIO;ZFYVE9;PTPRM;PTPRK;CMIP;ALCAM;AKAP11;HERC1;MPRIIP;SH3PXD2A;KIF13A;SACS;ANKFY1;DIP2B;ERC1;TEAD1;NEO1;GTF2I;UNC13B;ARHGEF11;ARHGEF12;DST;IL1R1;VPS13C;FNDC3B;AFAP1;FNDC3A;RC3H2;TANC2;TANC1;WDFY3;BIRC6;UTRN;DOCK1;YAP1;NOTCH2;MACF1;NFAT5;RABGAP1;WDR26;ABHD2;KMT2C;LPP;PCNX1;SCAF8;MAPK8;HECTD1;HECTD4;ABL1;FLNB;HIVEP2;ATP9A;MAP4K4;USP24;SPEN;CREBBP;TRAPPC10;EXOC6B;SAMD4A;ERBIN;DNAJC13;LAMB1;AP2B1;SYNJ2;PUM1;GNG12;MTOR;MED13L;PLEKHA8;EXT1;TJP1;SLMAP;DLG5;FAT1;CDK12;ATP13A3             |
| RAPGEF5<br>human tf<br>ARCHS4<br>coexpressi<br>on | 77/299 | 2.556655119<br>321648E-8 | DOCK4;DOCK3;ATP8A1;FRMPD4;DOCK9;CTNND2;RASGRF2;OTUD7A;RPH3A;SYNPR;GRM5;AKAP11;TRIM2;MCF2L;PSD3;DLGAP1;EDIL3;CALN1;KCNH1;CADPS2;RBFOX1;MBNL2;DST;PRKCE;TMOD2;MTUS1;COBL;MYRIP;SYN2;MAPK8IP1;GABRG1;AJAP1;CNKSR2;DNM3;SCN8A;WDFY3;PLCB1;NGEF;RAPGEF4;SLC24A2;NECAB1;SHC3;STXBP1;                                                                                                                                                                                                                            |

|                                     |        |                       |                                                                                                                                                                                                                                                                                                                                                                                                                                                                                                                   |
|-------------------------------------|--------|-----------------------|-------------------------------------------------------------------------------------------------------------------------------------------------------------------------------------------------------------------------------------------------------------------------------------------------------------------------------------------------------------------------------------------------------------------------------------------------------------------------------------------------------------------|
|                                     |        |                       | SLC1A2;PRKCZ;KALRN;NALCN;RAP1GAP;KIAA0513;GRIN2A;SV2B;EPB41L3;SPOCK3;CLVS2;SPOCK1;GPR158;ATP9A;OPCML;ARNT2;DTNA;SYT1;CADM2;ATRNL1;KIAA1549L;MYO5A;ATP2B2;SNAP91;LRP1B;ETNPPL;TTLL7;PTPRD;ARHGAP32;DLG2;SYNJ1;PPP2R2C;CNTN1;SCN2A                                                                                                                                                                                                                                                                                  |
| RGS7 human tf ARCHS4 coexpression   | 77/299 | 2.556655119321648E-8  | PCSK2;DOCK3;KCNC1;FRMPD4;MYT1L;CTNND2;HS6ST3;RPH3A;UNC80;SYNPR;GRM5;TRIM2;MCF2L;PSD3;DLGAP1;PRKACB;SH3GL2;PPFIA2;KCNH1;UNC13C;RBFox1;PRKCE;TMOD2;MYRIP;SEZ6L;SYN2;GABRG2;MAPK8IP1;AJAP1;CNKSR2;DNM3;MPPED1;SCN8A;KCNMA1;PLCB1;NGEF;RAPGEF4;SLC24A2;NECAB1;RTN1;SHC3;STXBP1;SLC1A2;PRKCZ;KALRN;NALCN;RAP1GAP;KIAA0513;GRIN2A;DPP6;PGBD5;SV2B;SPOCK3;CLVS2;GPR158;ATP9A;OPCML;GABBR2;ARNT2;PTPRN2;NDFIP1;SYT1;CADM2;CADPS;SLC4A10;KIAA1549L;MYO5A;ATP2B2;CORO2B;SNAP91;DLG2;SYNJ1;PPP2R2C;RCAN2;CNTN1;CPE;SCN2A     |
| DACH2 human tf ARCHS4 coexpression  | 76/299 | 5.989632969160491E-8  | GABRB3;MYT1L;PTPRO;CELF4;ELAVL4;CDH8;SYNPR;C1ORF127;GRM7;DPYSL5;TRIM2;KIF21A;ZNF385D;ANKS1B;PPFIA2;EPHA6;CACNA2D1;LRRC49;TMOD2;MAGI2;EBF1;MTUS2;SEZ6L;PGM2L1;NAV3;NRG3;IFT81;ADGRB3;LRRC7;CDH18;ASTN1;ZNF112;NECAB1;RTN1;NRXN3;ZNF66;NREP;NOL4;NALCN;CACNA1E;FGD4;STOX2;DPP6;GNG2;SUSD4;CAMTA1;SUSD6;NCAM1;CTNNA2;SRGAP3;PAK3;PAK5;CADM1;SYT1;PCDH9;CADM2;LSAMP;SLC4A10;GRIN2B;USH2A;SNAP91;DCDC1;MAPK10;NELLE2;RALYL;DLG2;FGF14;NBEA;PPP2R2B;ASXL3;TTC3;CNTN1;FAT3;GALNTL6;SCN2A;SSBP2                           |
| THRB human tf ARCHS4 coexpression   | 76/299 | 5.989632969160491E-8  | PTPRT;DOCK3;MAST4;FRMPD4;CHRM5;C12ORF42;RPH3A;UNC80;SYNPR;GRM5;ADAMTSL3;PSD3;DLGAP1;ANKS1B;KCNH1;UNC13C;RBFox1;KCNH5;ARHGEF12;KCND3;PRKCE;TMOD2;KCTD1;ANK3;ELOVL7;SYN2;CNKSR2;DNM3;SCN8A;PPARA;PLCB1;VSTM2A;NGEF;RAPGEF4;SLC24A2;STOML1;HEPACAM;STXBP1;SLC1A2;AKAP6;KALRN;NALCN;KIAA0513;GRIN2A;DPP6;PCNX2;RIC8B;PGBD5;SV2B;ST8SIA5;CAMTA1;GPC5;ATP9A;OPCML;GABBR2;ARNT2;OSBPL6;SYT1;NEGR1;CADM2;ATRNL1;SLC4A10;KIAA1549L;FBXL17;ATP2B2;SNAP91;ETNPPL;TTC39B;TTLL7;ARHGAP32;DLG2;PPP2R2C;RCAN2;SCN2A;OSBPL1A;HCN1 |
| ZFHX3 human tf ARCHS4 coexpression  | 75/299 | 1.3406515125423934E-7 | RYR2;PATJ;DOCK4;TRIO;DOCK9;CELF4;KIAA1671;PTPRM;SIPA1L3;RYR3;RPTOR;C4ORF50;UNC80;HERC2;RPS6KA5;HERC1;MPRIIP;ADAMTSL3;MCF2L;PSD3;GAST;ERC1;VWFP1;ARHGEF12;DST;ABCC9;ANK3;URB1;SHISA9;KLF15;TANC2;TANC1;NAV3;PEAK1;HECW2;WDPCP;WDFY3;BIRC6;RAPGEF5;PPARA;DGKI;NOTCH2;MACF1;NFAT5;KMT2C;CACNA1C;CACNA1E;LPP;PDZD2;KIAA1328;HECTD4;PLXNA2;GSG1L;ABL2;FLNB;NCAM1;CSMD1;ATP9B;ATP9A;ARNT2;FARP1;ANKRD30BL;NTRK3;MICAL3;NSG1;GRIN2B;MYO9A;HS3ST4;PBX1;TJP1;ARHGAP32;GNAL;PDE10A;NEDD4;FAT3                               |
| ZEB2 human tf ARCHS4 coexpression   | 75/299 | 1.3406515125423934E-7 | DOCK4;PID1;MCTP1;ANKRD36;MEGF11;DOCK8;ANKRD20A1;FRY;BACH1;LYST;SLC8A1;FAM107B;DOCK10;AKAP13;GRM5;RASSF2;HERC1;GRM7;TRIM2;TMEM108;LUC7L;KIF21B;DAPK1;GRID1;VPS13C;PDE4D;TMOD2;ARAP2;VPS13B;FAM126B;ZDHHC17;RUNX1;PHF20L1;DNM3;MPPE1;LRRC7;DPYD;KCNQ3;RAPGEF2;WDFY3;COL6A6;DOCK2;MACF1;RABGAP1;WDR26;CTTNBP2;KMT2C;AOAH;NR2C1;GNG2;NCAM1;PLXNA4;MYEF2;NTRK3;SYT16;MYO5A;RAB27A;SYT14;FOXN3;PPP2R3A;PLXDC2;ARHGAP26;SMARCA2;GRIN2B;MED13L;PTPRD;CCDC88A;PTPRE;DLG2;DAB1;APC;NFIB;DMXL2;CCSER1;TCF4                   |
| ZNF462 human tf ARCHS4 coexpression | 75/299 | 1.3406515125423934E-7 | GABRB3;ROBO2;DRAXIN;TENM4;CHD6;ZBTB20;PSIP1;BITD1;IGF1R;TTC28;RIMS2;ZNF608;CDH2;DPYSL5;TRIM2;ADAMTSL3;KIF21A;JARID2;PPFIA2;MAGI1;RBFox2;ADGRV1;LRRC49;HUNK;RFX3;ANK3;NAV2;ARID1B;NAA1ADL2;PIAS2;ENAH;PYGO1;NCOR1;IFT81;ZNF397;BTF                                                                                                                                                                                                                                                                                 |

|                                     |        |                       |                                                                                                                                                                                                                                                                                                                                                                                                                                                                                                                                                                           |
|-------------------------------------|--------|-----------------------|---------------------------------------------------------------------------------------------------------------------------------------------------------------------------------------------------------------------------------------------------------------------------------------------------------------------------------------------------------------------------------------------------------------------------------------------------------------------------------------------------------------------------------------------------------------------------|
| on                                  |        |                       | 3L4; ILDR2; RASAL2; NREP; KALRN; PHF21B; STOX2; CECR2; ZNF704; CAMTA1; APBB2; NCAM1; SRGAP3; ZNF423; MPDZ; PAK5; BPTF; FARP1; MYEF2; CADM1; AUTS2; ST8SIA2; P TCH1; YLPM1; PBX1; GULP1; TJP1; PTPRD; CCDC88A; AGO1; KLHL7; TTC3; YPEL1; ZNF536; FAT3; TCF4; RGS12; KIAA1958; ADGRL2; TNRC6B                                                                                                                                                                                                                                                                               |
| NCOA2 human tf ARCHS4 coexpressi on | 75/299 | 1.3406515125423934E-7 | RERE; DIDO1; RNF11; LPGAT1; ATP8A1; USP32; DOCK8; EFCAB14; FRY; BACH1; SIPA1L3; LYST; SYNE2; AKAP13; EFR3A; GLT1D1; NIPBL; RASSF2; C16ORF72; HERC1; ZNF407; ADGRE3; DIP2B; JAK2; IL6R; MAP3K5; RBM33; MBNL1; ARHGEF12; VPS13C; ARAP2; VPS13B; IL17RA; PARP8; DPYD; WDFY3; BIRC6; UTRN; DOCK2; MCTP2; KDM7A; NOTCH2; MACF1; NFAT5; MTMR3; WDR26; ABHD2; KMT2C; RNF38; ITPR2; CSF2RB; IQGAP1; PCNX1; SCAF8; HECTD1; HECTD4; HIVEP2; LYN; ARFGEF1; USP24; CREBBP; MGAM; IQSEC1; LRBA; TRAPPC10; DENND4C; ERBIN; LNPEP; DNAJC13; ARHGAP26; SMARCA2; MED13L; DMXL2; SP3; CDK12 |
| FOXP2 human tf ARCHS4 coexpressi on | 74/299 | 3.04000285494918E-7   | DPP10; DRAXIN; MYT1L; TUSC3; CELF4; ELAVL4; ZBTB20; GRIK1; GRIK2; EFCAB6; PTPRG; RIMS1; DACH1; ZNF280B; DNER; KIF21A; RALGPS1; ANKS1B; ZNF684; TMEM178B; DCC; LRRC49; EBF1; MTUS2; ANK3; ARID1B; PGM2L1; SHISA6; ADGRB3; DOK5; AMPH; ALG10B; CDH18; KHDRBS2; RTN1; TSHZ3; CHRNA7; TSHZ2; ZNF66; KLHL13; NREP; NYAP2; ADAM29; DPP6; PDCD6IPP2; GNG2; ZMAT4; CAMTA1; NCAM1; CTNNA2; CSMD3; PAK3; VAT1L; CLVS1; CNTN5; AUTS2; NEGR1; ST8SIA1; ST8SIA2; RANBP17; CADPS; PBX3; KLHL1; PBX1; ENOX1; PTPRD; CCDC88A; RALYL; FER; ASXL3; TTC3; ZNF74; LRP12; LHX9                 |
| MGA human tf ARCHS4 coexpressi on   | 74/299 | 3.04000285494918E-7   | LIN54; PATJ; SETD2; SMG1P2; ZBTB20; MYSM1; SYNE2; OSBPL10; IGF1R; AKAP13; NIPBL; PTAR1; HERC2; C16ORF72; HERC1; ADAMTSL3; PPP6R3; SACS; ERC1; USP8; AQR; ARHGEF12; ESCO1; DST; VPS13C; VPS13B; ARID1B; PIAS2; NCOR1; PEAK1; WDPCP; WDFY3; PIK3C3; ASTN2; UTRN; MACF1; NFAT5; RABGAP1; KMT2C; IREB2; RGPD5; ITPR2; THADA; UBR1; MIPOL1; PCNX1; SCAF8; BTAF1; KIAA1328; HECTD1; TRPM7; MPDZ; ATP9B; BPTF; SPECC1; ARFGEF1; USP24; MBD5; LRBA; DENND4C; ERBIN; ADAM32; LNPEP; PHC3; MYO9A; PTK2; MED13L; TJP1; KANSL1; AGO1; NEDD4; CDK12; ASB3; TNRC6B                      |
| MEF2C human tf ARCHS4 coexpressi on | 73/299 | 6.776943140783708E-7  | MYOM1; MYLK2; ATP8A1; MYT1L; LDB3; LRRC2; SLC8A1; GRM5; AKAP11; SGCD; HERC1; TRIM2; PEBP4; MYO18B; DLGAP1; PRKACB; SH3GL2; SGCG; RBFOX1; DSCAM; PRKCB; CACNA2D1; PRKCE; TMOD2; TRDN; DNM3; MMP16; MPPED1; MYL1; LRRRC7; SCN8A; ALPK3; KCNQ5; DGKI; PRKAA2; PPM1L; TRAK1; KALRN; GRIN2A; SV2B; FUT9; NRAP; SYNDIG1; TNNI1; XIRP2; ZNF106; CTNNA3; NCAM1; HIVEP2; PLXNA4; ATP9A; OPCML; SVIL; SYT1; CADM2; AGL; SYT16; KIAA1549L; MYO5A; PDE4DIP; ATP2B2; GRIN2B; DLC1; SNAP91; TLL7; PTPRD; DLG2; AGBL1; APC; TCF4; SCN2A; ASB2; FGF12                                     |
| ELK4 human tf ARCHS4 coexpressi on  | 73/299 | 6.776943140783708E-7  | PATJ; MAML2; DOCK9; DOCK8; CEP120; EFCAB14; RORA; LIMD1; MYSM1; SYNE2; DOCK10; AKAP13; POTE; NIPBL; PTAR1; HERC1; LRRFIP1; RBM33; CAST; MBNL1; PRKCH; ARHGEF12; ITGA4; VPS13C; ARAP2; VPS13B; TC2N; ARID1B; RUNX1; PARP8; INPP4B; PACS1; BIRC6; DOCK2; MCTP2; KDM7A; NOTCH2; MACF1; NFAT5; WDR26; DNAH8; ABHD2; KMT2C; ITPR2; IQGAP1; LPP; RASGRP1; PCNX1; KIAA1328; HECTD1; HECTD4; TRPM7; HIVEP2; PDLIM5; ARFGEF1; USP24; OR51E1; CREBBP; LRBA; TRAPPC10; DENND4C; ERBIN; LNPEP; FOXN3; SMARCA2; PHC3; PARP15; GATAD2B; MED13L; SLMAP; AGO2; SP3; CDK12                 |
| AFF1 human tf ARCHS4 coexpressi on  | 72/299 | 1.4849784821845063E-6 | RERE; DIDO1; ATP8A1; KDM1B; DOCK9; DOCK8; CHD6; KIAA1671; EFCAB14; LIMD1; SIPA1L3; MYSM1; YBX3; AKAP13; FYCO1; NIPBL; HERC1; ZNF407; KIF13A; LRRFIP1; RBM33; CAST; MBNL1; ARHGEF12; ITGA4; VPS13C; VPS13B; RUNX1; KIAA1217; BMP2K; WDFY3; BIRC6; UTRN; DOCK2; MCTP2; KDM7A; FKBP5; MACF1; NFAT5; MTMR3; WDR26; ABHD2; KM                                                                                                                                                                                                                                                  |

|                                     |        |                       |                                                                                                                                                                                                                                                                                                                                                                                                                                                                                        |
|-------------------------------------|--------|-----------------------|----------------------------------------------------------------------------------------------------------------------------------------------------------------------------------------------------------------------------------------------------------------------------------------------------------------------------------------------------------------------------------------------------------------------------------------------------------------------------------------|
|                                     |        |                       | <i>T2C;DNAH5;ITPR2;IQGAP1;AMBRA1;PCNX1;SCAF8;LARP1;HECTD1;HECTD4;FLNB;HIVEP2;ARFGF1;USP24;SPEN;CREBBP;LRBA;TRAPPC10;DENND4C;ERBIN;XPO7;LNPEP;DNAJC13;FOXN3;SMARCA2;MTOR;MED13L;DIAPH1;SP3;CDK12</i>                                                                                                                                                                                                                                                                                    |
| BDP1 human tf ARCHS4 coexpression   | 72/299 | 1.4849784821845063E-6 | <i>TCERG1;SETD2;ZFYVE9;ANKRD36;USP33;CWC27;MYSM1;SYNE2;AKAP13;NIPBL;HERC2;NHSL1;HERC1;ADAMTSL3;SACS;PPF1A2;POTEC;ANKRD36C;TTC37;ARHGEF12;ESCO1;DST;VPS13C;VPS13B;ARID1B;SUPT3H;NCOR1;LRR7;PEAK1;WDPCP;WDFY3;ZNF678;BIRC6;ASTN2;ZNF236;UTRN;ANKRD36B;MACF1;NFAT5;TBC1D19;ROCK1;KMT2C;RGP6;MIPOL1;KIAA1328;TTC21B;ANKRD20A5P;ANKRD36BP2;ATP9B;BPTF;ARFGF1;USP24;SPEN;USP25;MBD5;LRBA;MGA;ERBIN;YLPM1;ADAM32;MYO9A;CCDC88A;NBEA;APC;NEDD4;FAT3;CCSER1;TCF4;CDK12;PTPN4;TNRC6B;CCDC171</i> |
| SOX4 human tf ARCHS4 coexpression   | 71/299 | 3.0418558031735515E-6 | <i>SLC44A5;ROBO2;CNTNAP2;DRAXIN;MYT1L;CLCN3P1;PTPRO;ELAVL4;SLC35F1;GRIK2;GPHN;SRGAP2C;NHSL1;DPYSL5;LRRMT4;TMEM108;KIF21A;SOX6;SRGAP2B;MAGI1;EPHA7;WSB1;LRRC49;TCF12;ENAH;IFT81;LRRC7;MPPED2;ZNF234;XPR1;GRIA1;CRB1;RTN1;CTTNBP2;ATL1;CHRNA7;BTF3L4;NRXN3;NREP;FGD4;GNG2;SNTG1;SRGAP3;PAK3;JAM2;PAK5;GRIA4;RFTN2;ZNF462;CADM1;AUTS2;SIAH3;INSR;ST8SIA2;RANBP17;CORO2B;ST18;PBX1;MAPK10;CCDC88A;NFIA;NBEA;APC;NFIB;KLHL7;ASXL3;TTC3;ZNF536;TCF4;SSBP2;LRP12</i>                          |
| SOX11 human tf ARCHS4 coexpression  | 71/299 | 3.0418558031735515E-6 | <i>SLC44A5;DRAXIN;MYT1L;ANKRD36;PTPRO;ELAVL4;MSAINTD4;GPHN;NHSL1;CDH2;DPYSL5;TRIM2;SNAPC3;LUC7L;KIF21A;WSB1;RBF2;DCC;LRRC49;MAGI2;RFX3;ENAH;IFT81;LRRC7;MPPED2;ZNF675;XPR1;GRIA1;CRB1;RTN1;STAU2;ATL1;NTM;BTF3L4;NRXN3;AKAP6;NREP;NOL4;PHF21B;FGD4;GNG2;ZNF627;NCAM1;CTNNA2;SRGAP3;PAK3;PAK5;CLVS1;ATF7IP;RIC3;ZNF462;MON2;MYEF2;CADM1;AUTS2;ST8SIA2;ST18;MAPK10;NELL2;CCDC88A;NFIA;NFIB;AGO1;KLHL7;ASXL3;TTC3;YPEL1;ZNF536;TCF4;SSBP2;LRP12</i>                                       |
| ZNF365 human tf ARCHS4 coexpression | 71/299 | 3.0418558031735515E-6 | <i>DOCK3;KCNK1;FRMPD4;OTUD7A;RPH3A;UNC80;SYNPR;GRM5;AKAP11;MCF2L;PSD3;DLGAP1;PRKACB;SH3GL2;CALN1;KCNH1;RBF2;TMEM178A;PRKCE;TMOD2;MYRIP;SYN2;GABRG2;MAPK8IP1;GABRG1;AJAP1;CNKSR2;DNM3;MPPED1;SCN8A;KCNMA1;RAPGEF5;PLCB1;NGEF;ASTN1;RAPGEF4;SLC24A2;NECAB1;SHC3;STXB1;SLC1A2;PRKCZ;NALCN;RAP1GAP;KIAA0513;GRIN2A;CLVS2;SPOCK1;GPR158;ATP9A;OPCML;GABBR2;ARNT2;GABRA6;SYT1;CADM2;ATRNL1;SLC4A10;SYT16;KIAA1549L;MYO5A;ATP2B2;SNAP91;TLL7;DLG2;SYNJ1;PPP2R2C;RCAN2;CNTN1;SCN2A;HCN1</i>    |
| BNC2 human tf ARCHS4 coexpression   | 71/299 | 3.0418558031735515E-6 | <i>NRP1;PTPRQ;COL14A1;CHRM5;EFCAB6;GXYLT2;C12ORF42;ANTXR1;PTPRG;EPS8;ADAMTSL1;TUBB6;ARHGAP42;SGCD;HMCN2;PHACTR2;TEAD1;PRKG1;ADAMTS6;POSTN;MUSK;DST;FNDC3B;ARID5B;NAV2;EML1;FAM126A;TBC1D1;FRMD6;ELF2;EVC;HEATR5A;NAV3;PEAK1;CDH13;ALPK2;TLN2;PPP1R12B;DOCK1;VCL;DDR2;RAI14;MACF1;SAR1A;FSTL1;LPP;LTBP1;GLIS1;ARSJ;PDGFC;CHSY3;PDLIM5;STARD13;EYA4;CRIM1;CYBRD1;ARHGAP28;LAMB1;GNG12;FBXO32;CDC42BPA;TJP1;PPFIBP1;COL5A1;DLCL1;SLMAP;SSPN;ITGBL1;SNAI2;FBXL7;FBN1</i>                   |
| TOX3 human tf ARCHS4 coexpression   | 71/299 | 3.0418558031735515E-6 | <i>ROBO2;DRAXIN;TENM4;ELAVL4;SLC35F1;SRGAP2C;ZNF608;NHSL1;DACH1;CDH2;DPYSL5;TRIM2;TMEM108;KIF21A;SOX6;EPHB2;SRGAP2B;MAGI1;WSB1;TMEM178B;LRRC49;MAGI3;TCF12;MAGI2;RFX3;GAREM1;CFDP1;IFT81;MPPED2;PDZRN3;ZNF234;CRB1;CHRNA7;ILDR2;NREP;NPAS3;FGD4;STOX2;GTF2IP1;NKAIN3;ZNF3;SNTG1;ZNF704;ZNF627;SRGAP3;PAK3;JAM2;BPTF;RFTN2;FOX B1;ZNF462;FARP1;PTPRN2;MYEF2;AUTS2;PTCH1;RANBP17;LSAMP;ST18;PBX1;PTPRD;IGSF11;CCDC88A;NFIA</i>                                                           |



|                                                  |        |                           |                                                                                                                                                                                                                                                                                                                                                                                                                                                                                           |
|--------------------------------------------------|--------|---------------------------|-------------------------------------------------------------------------------------------------------------------------------------------------------------------------------------------------------------------------------------------------------------------------------------------------------------------------------------------------------------------------------------------------------------------------------------------------------------------------------------------|
|                                                  |        |                           | ;TTC3;YPEL1;FAT3;TCF4;KIAA1958;BMPR1B;TNRC6B                                                                                                                                                                                                                                                                                                                                                                                                                                              |
| NCOR1<br>human tf<br>ARCHS4<br>coexpressi<br>on  | 71/299 | 3.041855803<br>1735515E-6 | SETD2;DOCK8;DPY19L2P2;GADL1;SYNE2;TTC28;UNC80<br>7;AKAP13;NIPBL;HERC2;HERC1;CA5A;ADAMTSL3;ZNF40<br>3;WDFY3;BIRC6;ASTN2;UTRN;MACF1;NFAT5;KM<br>T2C;ITPR2;ATP10B;LPP;MIPOL1;ATXN3;PCNX1;KIAA1<br>328;HECTD4;ANKRD36BP2;ATP9B;BPTF;SPECC1;ARFGE<br>F1;USP24;SPEN;ZNF462;CREBBP;RABGAP1L;MBD5;LRB<br>A;MGA;DENND4C;YLPM1;ADAM32;LNPEP;PHC3;PARP15;<br>MYO9A;MED13L;ARHGAP32;KANS1;NEDD4;CDK12;ASB3<br>;TNRC6B                                                                                 |
| MEF2A<br>human tf<br>ARCHS4<br>coexpressi<br>on  | 70/299 | 6.151475741<br>225199E-6  | ATF1;RYR2;MYO1;DOCK4;DOCK9;EFCAB14;LDB3;FRY;<br>SLC8A1;AKAP13;FYCO1;EFR3A;ALCAM;SGCD;HERC1;PE<br>BP4;KIF13A;MYO18B;PGM5;SGCG;SH3GLB1;MBNL1;MLI<br>P;MBNL2;SFM2;VPS13C;TRDN;TOM1L2;ZNF717;MYL1<br>;KCNMA1;BMP2K;ALPK3;KCNQ5;WDFY3;ALPK2;TLN2;PP<br>P1R12B;MACF1;RABGAP1;ITPR2;CACNA1C;TRAK1;BCL2<br>L13;ABLM1;SCFD2;NRAP;TBX20;TNNT1;XIRP2;ZNF10<br>6;CTNNA3;HIVEP2;PDLIM5;SVIL;NEBL;EFL1;NEK7;SA<br>MD4A;PDE4DIP;LNPEP;LHFPL2;PLXDC2;FBXO32;SMAR<br>C2;MOB1B;ARHGAP31;ANKRD18A;RGL1;ASB2  |
| TEAD1<br>human tf<br>ARCHS4<br>coexpressi<br>on  | 70/299 | 6.151475741<br>225199E-6  | TRIO;TENM3;MAST2;PTPRM;PTPRK;ANTXR1;FYCO1;TUB<br>B6;SGCD;MPRI;SH3PXD2A;KIF13A;MYO18B;SACS;PRK<br>G1;ARHGEF12;DST;FNDC3B;AFAP1;NAV2;FRMD6;EVC;<br>COL4A2;ALPK3;MXRA7;ALPK2;DOCK1;MET;VCL;CHST3;<br>DR2;RAI14;YAP1;NOTCH2;SEMA3C;NTN4;TMTC1;FSTL1<br>;LTBP1;HECTD1;ARSL;NRAP;ABL1;TNNT1;XIRP2;ZNF1<br>06;FLNB;PDLIM5;MPDZ;CTNNA1;SVIL;NEK7;EYA4;SA<br>MD4A;CRIM1;LAMB1;AP2B1;GNG12;FBXO32;EXT1;TJP1<br>;ANLN;PPIBP1;DPY19L1;COL5A1;DLCL1;DLG5;FAT1;<br>SNAI2;FBN1                           |
| ZNF436<br>human tf<br>ARCHS4<br>coexpressi<br>on | 70/299 | 6.151475741<br>225199E-6  | SEMA5A;DRAXIN;THSD7B;SLC35F1;BICD1;PTPRG;ROBO<br>1;SRGAP2C;TRIM9;ADAMTS3;CDH2;DPYSL5;TRIM2;AKT<br>3;DNER;SACS;KIF21A;ERC1;SOX6;SRGAP2B;MAGI1;RB<br>FOX2;DST;SEMA6D;FOXP2;TANC2;PJA2;ADGRB3;COL21<br>A1;ZMYND11;VSTM2A;CHST3;EXOC1;GRIA1;MACF1;MAG<br>EL2;SHC3;IGSF3;TNKS;ZBTB49;NREP;NPAS3;GNG2;ZN<br>F704;MVB12B;APBB2;NCAM1;TSPAN3;JAM2;PAK5;VAT1<br>L;RFTN2;NDFIP1;ST8SIA2;NTRK3;SORBS2;NETO2;AP2<br>B1;CORO2B;DCLK1;PTPRD;DLG2;APC;RCAN2;TTC3;TRP<br>V5;SPIRE1;TCF4;FBXL7;LRP12       |
| ZNF248<br>human tf<br>ARCHS4<br>coexpressi<br>on | 70/299 | 6.151475741<br>225199E-6  | MYT1L;PTPRO;ELAVL4;GRM3;DPYSL5;TRIM2;AKT3;DNE<br>R;HMCN2;KIF21A;RALGPS1;ANKS1B;PPFIA2;PRMT8;WS<br>B1;RBFox2;LRRC49;TMOD2;OPRM1;SEZ6L;PJA2;ADGRB<br>3;LRRC7;PPP1R12B;MAPRE2;ANKRD36B;ASTN1;ZNF112<br>;GRIA1;KHDRBS2;RTN1;TNKS;STXBP1;NRXN3;AKAP6;<br>CACNA1C;NREP;NYAP2;CACNA1E;LPP;STOX2;MAPK8;<br>GNG2;CLVS2;NCAM1;CTNNA2;SRGAP3;PAK3;GRIA4;GABRA2<br>;CADM1;SYT1;ST8SIA2;LSAMP;DCLK1;PBX1;ENOX1;TT<br>LL7;PTPRD;MAPK10;CCDC88A;DLG2;APC;KLHL7;SLMAP<br>;TTC3;SCN2A;KIAA1958;SSBP2;APBA2 |
| ID4 human<br>tf ARCHS4<br>coexpressi<br>on       | 70/299 | 6.151475741<br>225199E-6  | TENM4;CTNND2;GRIK4;ZBTB20;FMN2;SIPIA1L2;SYNE2;<br>GRM3;TRIM9;UBL3;DACH1;CDH2;TRIM2;KIF21A;NEO1;<br>MAGI1;ADGRV1;TMEM178B;KCND3;LRRC49;RFX3;KAZN;<br>SEZ6L;PARD3B;PYGO1;ANKFN1;IFT81;ADGRB3;PARD3;<br>ZNF678;DGKI;CHST3;MAGEL2;PHLPP1;SHC3;NTM;ILDR<br>2;APCDD1;NPAS3;STOX2;GTF2IP1;ZNF704;LRIG1;GPC<br>5;NCAM1;TSPAN3;SRGAP3;SLIT2;MPDZ;JAM2;ARNT2;<br>NTRK2;MBD5;NDFIP1;DTNA;MYEF2;VCAM1;AUTS2;ST8S<br>IA1;PTCH1;PCDH7;FAM189A2;DCLK1;PBX1;PTPRD;TTC6<br>;FABP7;SMOC1;SPIRE1;FAT3        |
| BAZ2B<br>human tf<br>ARCHS4                      | 70/299 | 6.151475741<br>225199E-6  | DPP10;CCDC122;ANKRD36;CHD9;USP33;GADL1;ELAVL4<br>;FRG1HP;ZBTB20;EFCAB6;MYLK3;SYNE2;UNC80;DACH1<br>;ZSCAN30;PPIP5K2;CA5A;ADAMTSL3;GATAD1;SCAPER;<br>POTEC;MAGI1;ANKRD36C;WSB1;LRRC49;KCNH8;MAGI2;                                                                                                                                                                                                                                                                                          |

|                                                  |        |                           |                                                                                                                                                                                                                                                                                                                                                                                                                                                                      |
|--------------------------------------------------|--------|---------------------------|----------------------------------------------------------------------------------------------------------------------------------------------------------------------------------------------------------------------------------------------------------------------------------------------------------------------------------------------------------------------------------------------------------------------------------------------------------------------|
| coexpressi<br>on                                 |        |                           | RFX3;VPS13B;FAM126B;SHISA9;ARID1B;PCCA;IFT81;PEAK1;WDPCP;WDFY3;ASTN2;ANKRD36B;SDCCAG8;CRB1;KMT2C;RGPD5;MIPOL1;STK3;FGD4;FGGY;KIAA1328;SNTG1;ANKRD36BP2;CSMD3;SRGAP3;LRRC4C;ATP9B;BPTF;RFTN2;MBD5;MYEF2;RANBP17;ADAM32;ARHGAP28;ST18;CDC1;MAPK10;CCDC88A;FER;NEDD4;TTC3;ASB3;TNRC6B                                                                                                                                                                                   |
| PAX8 human<br>tf ARCHS4<br>coexpressi<br>on      | 69/299 | 1.267535215<br>3749261E-5 | COL18A1;PATJ;ATP8A1;DOCK9;CPQ;KIAA1671;PTPRM;ZBTB20;SIPA1L3;SYNE2;PTPRG;AKAP13;DEPTOR;MPRI;MECOM;ENPP3;ADAMTS9;GTF2I;CUBN;ARHGEF12;COL23A1;ARAP2;WDR72;KIAA1217;TANC1;GOLGA8B;FNDC1;WDFY3;BIRC6;UTRN;DOCK1;MET;DGKI;FKBP5;ITGA9;YAP1;NOTCH2;MACF1;NFAT5;SEMA3D;SDC2;ARHGEF28;GLIS3;LRP2;PRDM11;RAP1GAP;THSD4;PKHD1;HECTD1;FLNB;ZBTB7C;FARP1;STARD13;HOMER2;LRBA;ZBTB16;SLC12A1;ZNF804B;FAM189A2;CYBRD1;SORBS2;LAMB1;MYO9A;PTPRB;ARHGAP31;MYO5B;GGT3P;ATP13A3;ADGR L2 |
| ZFP28<br>human tf<br>ARCHS4<br>coexpressi<br>on  | 69/299 | 1.267535215<br>3749261E-5 | CYFIP2;GABRB3;SPAG16;DOCK3;FRMPD4;ANKRD36;CELF4;ZBTB20;ZNF44;UNC80;TRIM9;DACH1;DPYSL5;PEG10;AKT3;HYDIN2;BBS9;RGS7;GUSBP1;EPHA6;RBFOX2;ABCC8;PDE4D;PRKCA;ABCC9;SCAMP1;ARID1B;FOX2;PJ A2;CACNB2;LRRC7;MYO3A;AMPH;CNTNAP5;STX12;PPM1L;TNKS;NTM;NOL4;NALCN;SLC7A2;MTMR7;SDCBP;GRIN2A;FUT9;ZMAT4;NCAM1;CSMD2;ATP9A;OPCML;PTPRN2;NTRK3;LSAMP;FAM189A2;SLC4A10;MYO5A;CDC42BPA;GRIN2B;PBX1;PTK2;PTPRD;TMEM232;FER;NBEA;APC;GSTA3;RCAN2;TTC3;CPEB4                            |
| FMNL2<br>human tf<br>ARCHS4<br>coexpressi<br>on  | 69/299 | 1.267535215<br>3749261E-5 | APP;DOCK4;DOCK3;ATP8A1;CTNND2;TRIM9;SPRED1;AKAP11;MPRI;TRIM2;MCF2L;PSD3;TNR;DLGAP1;DIP2B;EDIL3;KCNH1;RBFOX1;DST;TMOD2;MTUS1;KAZN;FAM219A;SYN2;MAPK8IP1;GABRG1;DNM3;SCN8A;WDFY3;TLN2;RAPGEF5;NGEF;ASTN1;RAPGEF4;SLC24A2;SHC3;PDE1C;STXBP1;SLC1A2;FAM171A1;CTIF;SV2B;SPOCK3;CLVS2;SPOCK1;NCAM1;GPR158;ATP9A;WASF3;MAP4K4;OPCML;ARNT2;DTNA;SYT1;CADM2;EXOC6B;KIAA1549L;MYO5A;ATP2B2;CORO2B;SNAP91;ETNPPL;TTLL7;TJP1;PTPRD;DLG2;PPP2R2C;SCN2A;OSBPL1A                    |
| TCF12<br>human tf<br>ARCHS4<br>coexpressi<br>on  | 68/299 | 2.566734746<br>6297275E-5 | MAML2;LDLRAD3;SLC35F1;KIF15;ROBO1;SRGAP2C;TRIM9;CDH2;SACS;TNR;SMARCA1;SOX6;ZNF521;SRGAP2B;GTF2I;MAGI1;WSB1;ADGRV1;DST;DCC;SEMA6D;RFX3;ENAH;ASPM;IFT81;ADGRB3;TOX;ZNF112;CREB5;CRB1;STXBP4;TNKS;BTF3L4;ILDR2;KLHL13;NREP;NPAS3;STOX2;NKAIN3;SNTG1;ZNF704;LRIG1;APBB2;TSPAN3;SRGAP3;MPDZ;JAM2;SLC15A5;GRIA4;BBS2;RFTN2;ATF7IP;NTRK2;MYEF2;RANBP17;PUM1;CORO2B;ST18;PTPRD;IGSF11;MAPK10;CCDC88A;APC;FABP7;SMOC1;FAT3;TCF4;KIAA1958                                      |
| ZBTB37<br>human tf<br>ARCHS4<br>coexpressi<br>on | 68/299 | 2.566734746<br>6297275E-5 | CCDC122;ANKRD36;DOCK8;USP33;GADL1;FRY;LYST;MYSM1;MYLK3;SYNE2;AKAP13;NIPBL;PTAR1;RPS6KA5;C16ORF72;HERC1;ZSCAN30;CA5A;ADAMTSL3;LONP2;POTEC;VPS13C;VPS13B;ABCC9;SHISA9;ARID1B;PARP8;PHF20L1;PEAK1;CNKSR3;WDPCP;WDFY3;BIRC6;PIK3C3;ASTN2;UTRN;MCTP2;KDM7A;MACF1;NFAT5;KMT2C;RGPD6;RGPD5;LPP;MIPOL1;ATXN3;PCNX1;KIAA1328;ANKRD36BP2;TRPM7;ATP9B;BPTF;RABGAP1L;MBD5;INSR;MGA;ERBIN;ADAM32;LNPEP;ARHGAP28;PHC3;PARP15;KANSL1;NEDD4;DMXL2;PTPN4;ASB3;TNRC6B                  |
| ZNF292<br>human tf<br>ARCHS4<br>coexpressi<br>on | 68/299 | 2.566734746<br>6297275E-5 | SLC44A5;TCERG1;CCDC122;ANKRD36;CHD9;ELAVL4;EF CAB6;SYNE2;GRM7;ZSCAN30;PIIP5K2;TRIM2;ADAMTSL3;KIF21A;ANKRD36C;WSB1;HFM1;DCC;LRRC49;VPS13C;MAGI2;RFX3;VPS13B;FAM126B;ARID1B;IFT81;LRRC7;HECW1;MPPED2;WDPCP;PIK3C3;ASTN2;ANKRD36B;CHRNA7;KMT2C;RGPD6;RGPD5;NREP;CACNA1E;MTMR7;MIPO L1;MAPK8;GNG2;KIAA1328;SNTG1;ANKRD36BP2;SRGAP3;CSMD2;PAK3;ATP9B;PAK5;BPTF;RIC3;ZNF462;MBD5                                                                                           |

|                                      |        |                          |                                                                                                                                                                                                                                                                                                                                                                                                                                                         |
|--------------------------------------|--------|--------------------------|---------------------------------------------------------------------------------------------------------------------------------------------------------------------------------------------------------------------------------------------------------------------------------------------------------------------------------------------------------------------------------------------------------------------------------------------------------|
|                                      |        |                          | ;MYEF2;ADAM32;DCDC1;CCDC88A;NBEA;KLHL7;NEDD4;ASXL3;TTC3;TCF4;SSBP2;ASB3;TNRC6B                                                                                                                                                                                                                                                                                                                                                                          |
| PGR human tf ARCHS4 coexpression     | 67/299 | 4.809324016<br>235369E-5 | PCSK2;ERO1B;PATJ;ZBTB20;ECE1;RORB;SERPINA6;AF F3;IGF1R;POTEKP;SCGN;PPP6R3;TMED3;LONP2;PLCE1;PAMR1;ADAMTS9;VAV3;VWFP1;ARHGEF12;DST;VPS13C;MAGI2;VPS13B;TBC1D9;PRLR;CACNB2;ALDH1A2;PPP1 R12B;FREM1;DOCK1;MACF1;SEMA3C;KMT2C;PRICKLE2;LRP2;FAM214A;LPP;SLC7A2;THSD4;TTR;ZNF704;GSE1;FLNB;AKAIN1;ARFGEF1;STARD13;ABCA5;ANKRD30A;LRBA;PTCH1;LAMB1;TDRD5;CDC42BPA;ELL2;ESR1;MPP7;MED13L;MOB1B;SDK1;PLCXD3;DLG5;MYO5C;VPS41;NE K10;CPE;CNTN4                   |
| HIVEP1 human tf ARCHS4 coexpression  | 67/299 | 4.809324016<br>235369E-5 | ANKRD33B;MAML2;KDM1B;IKZF2;BACH1;MYSM1;DOCK10;AKAP13;NIPBL;RPS6KA5;C16ORF72;HERC1;ADAMTSL3;ZNF407;RNF111;STPG2;KSR1;SFMBT2;VPS13C;FNDC3B;ARAP2;VPS13B;ARID1B;TRAF3;PEAK1;WDPCP;WDFY3;BIRC6;UTRN;DOCK2;WDFY4;KDM7A;MACF1;NFAT5;MTM R3;WDR26;KMT2C;ITPR2;IQGAP1;AMBRA1;PCNX1;SCAF8;BTAF1;ATXN1;KIAA1328;NLRP4;BTLA;TRPM7;SUSD6;HIVEP2;ATP9B;LYN;USP24;SPEN;CREBBP;LRBA;TRAP PC10;MGA;LNPEP;DNAJC13;SMARCA2;PARP15;GATAD2B;MED13L;NLRP13;DMXL2;CDK12       |
| KLF12 human tf ARCHS4 coexpression   | 67/299 | 4.809324016<br>235369E-5 | CYFIP2;ABCD2;MAML2;DOCK8;CEP120;RORA;LYST;SYN E2;DOCK10;AKAP13;RASSF2;HERC1;TRIM2;SACS;UBAS H3A;KIF21B;RBM33;CD96;MBNL1;RBFox2;PRKCH;ITGA4;CACNA2D1;VPS13C;TCF12;ARAP2;RFX3;VPS13B;TC2 N;IPCEF1;ZDHHC17;PARP8;PHF20L1;ITPKB;GOLGA8B;DPYD;BIRC6;TNIK;UTRN;DOCK2;KDM7A;MACF1;TNKS;K MT2C;NREP;RASGRP1;CACNA1I;STOX2;PCNX1;GNG2;NC AM1;FYN;HIVEP2;CREBBP;BCL11B;TRAPPC10;ERBIN;M YO5A;LNPEP;DCLK1;CCDC88A;APC;KANSL1;TTC3;CCSE R2;TCF4;PTPN4               |
| ZNF510 human tf ARCHS4 coexpression  | 67/299 | 4.809324016<br>235369E-5 | DIDO1;LPGAT1;TRIO;ATP8A1;ZFYVE9;DOCK9;USP32;R ASGRF2;CEP120;ZBTB21;NIPBL;PTAR1;GRM5;HERC2;Z NF608;AKAP11;HERC1;SACS;DIP2B;GTF2I;MED1;WDHD 1;CD96;ARHGEF12;DST;PRKCE;VPS13C;TMOD2;VPS13B;WDFY3;BIRC6;TNIK;RAPGEF5;UTRN;DGK1;MACF1;MTP N;KMT2C;PCNX1;SCAF8;BTAF1;HECTD1;ZNF704;HECTD 4;GTF2IP4;HIVEP2;ATP9A;ARFGEF1;USP24;SPEN;KDM 4C;LRBA;TRAPPC10;MGA;ERBIN;MYO5A;LNPEP;DNAJC1 3;ESRRG;AP2B1;SMARCA2;MTOR;MED13L;APC;SP3;FAT 3;CDK12                    |
| ZNF827 human tf ARCHS4 coexpression  | 67/299 | 4.809324016<br>235369E-5 | DPP10;DRAXIN;MYT1L;CHD9;SYCP1;CTNND2;ZBTB20;B ICD1;PTPRG;IGF1R;ZNF608;NHSL1;DACH1;CDH2;SCN1 1A;ADAMTSL3;KIF21A;STK32A;PPFIA2;MAGI1;TMEM17 8B;CACNA2D1;LRRC49;HUNK;RFX3;FRMD4A;ZDHHC17;A RID1B;ENAH;PEAK1;ASTN2;ZNF236;ARHGEF7;TNKS;CH RNA7;ILDR2;NREP;MIPOL1;NPAS3;PHF21B;STOX2;PDC D6IPP2;SNTG1;FUT9;NCAM1;SRGAP3;JAM2;BPTF;ZNF4 62;FARP1;MYEF2;AUTS2;NTRK3;RANBP17;CADPS;SORB S2;DCLK1;PBX1;PTPRD;CCDC88A;NFIA;PPP2R2B;ASXL 3;TTC3;RNF182;TCF4;TNRC6B |
| MYSM1 human tf ARCHS4 coexpression   | 67/299 | 4.809324016<br>235369E-5 | TCERG1;DIDO1;SETD2;LPGAT1;SMG1P2;RORA;SYNE2;A KAP13;NIPBL;PTAR1;C16ORF72;HERC1;JARID2;RBM33;MBNL1;USP7;VPS13C;ARAP2;VPS13B;TC2N;ARID1B;P ARP8;MSH6;GOLGA8B;FAR1;WDFY3;BIRC6;UTRN;KDM7A;MACF1;NFAT5;WDR26;ROCK1;KMT2C;IREB2;IQGAP1;L PP;PCNX1;SCAF8;LARP1;BTAF1;HECTD1;HECTD4;TRPM 7;MDN1;BPTF;ARFGEF1;USP24;SPEN;KDM4C;LRBA;TRA PPC10;MGA;ERBIN;LNPEP;PHC3;SCAF4;MTOR;MED13L; TJP1;MLLT10;KANSL1;AGO2;DMXL2;SP3;PKN2;CDK12                              |
| GATAD2B human tf ARCHS4 coexpression | 67/299 | 4.809324016<br>235369E-5 | CYFIP2;RERE;SETD2;DOCK8;LDLRAD4;CMIP;SYNE2;IG F1R;AKAP13;NIPBL;AKAP11;HERC1;AKT3;KIF21B;ERC 1;RBM33;CAMK1D;TMEM178B;PRKCB;SFMBT2;ANK3;ARI D1B;TANC2;AJAP1;UBE2R2;RFX7;PACS1;MADD;FAM193 A;TNIK;ARHGEF7;MACF1;NFAT5;WDR26;ANP32A;KMT2C                                                                                                                                                                                                                   |

|                                     |        |                      |                                                                                                                                                                                                                                                                                                                                                                                                                                                |
|-------------------------------------|--------|----------------------|------------------------------------------------------------------------------------------------------------------------------------------------------------------------------------------------------------------------------------------------------------------------------------------------------------------------------------------------------------------------------------------------------------------------------------------------|
| on                                  |        |                      | ;ANKRD11;KALRN;KIAA1328;HECTD4;GSE1;DROSHA;TRPM7;NCAM1;HIVEP2;PAK5;BPTF;SPEN;CREBBP;KDM4B;AUTS2;IQSEC1;TRAPPC10;PTCH1;MICAL3;LSAMP;YLPML1;LNPEP;SMARCA2;SCAF4;MED13L;DLG2;NBEA;KANSL1;AGO2;CDK12;TNRC6B                                                                                                                                                                                                                                        |
| CHD7 human tf ARCHS4 coexpression   | 67/299 | 4.809324016235369E-5 | TCERG1;DRAXIN;TENM4;ELAVL4;PSIP1;GLI3;SYNE2;KIF15;PTPRG;ZNF608;NHSL1;DACH1;CDH2;DPYSL5;ADAMTSL3;SMARCA1;KIF21A;SOX6;SRGAP2B;MAGI1;WSB1;DCC;ANKRD20A11P;LRRC49;MAGI3;TCF12;RFX3;ENAH;MMP16;IFT81;CCDC150;UBE2Q2P1;CRB1;PPM1L;TNKS;BTF3L4;GREB1L;ILDR2;NREP;KALRN;PHF21B;FGD4;STOX2;CECR2;KIAA1328;SRGAP3;MPDZ;BPTF;ATF7IP;ZNF462;FARF1;MYEF2;AUTS2;ST8SIA2;RANBP17;ST18;MAPK10;CCDC88A;NFIA;KANSL1;AGO1;KLHL7;TTC3;YPEL1;TCF4;KIAA1958;ASB3     |
| CHD2 human tf ARCHS4 coexpression   | 67/299 | 4.809324016235369E-5 | RERE;SETD2;DOCK8;SMG1P2;RORA;LYST;SYNE2;DOCK10;AKAP13;NIPBL;C16ORF72;HERC1;ADAMTSL3;ZNF407;LRRFIP1;RBM33;MBNL1;PRKCH;ITGA4;VPS13C;ARAP2;VPS13B;ARID1B;PARP8;GOLGA8B;NCOR1;PEAK1;FAM153A;BIRC6;UTRN;DOCK2;MCTP2;KDM7A;MACF1;NFAT5;WDR26;KMT2C;RGPD6;RGPD5;RGPD8;PCNX1;BTAF1;KIAA1328;HECTD4;TRPM7;HIVEP2;ATP9B;BPTF;LRRC37A3;USP24;SPEN;CREBBP;MBD5;KDM4C;LRBA;TRAPPC10;MGA;YLPML1;LNPEP;ARHGAP26;SMARCA2;PHC3;PARP15;MED13L;KANSL1;DMXL2;CDK12 |
| ZFH4 human tf ARCHS4 coexpression   | 66/299 | 9.241681330475861E-5 | ROBO2;DRAXIN;PTPRO;CELF4;ELAVL4;SLC35F1;GRIK2;ZNF608;DACH1;CDH2;DPYSL5;DNER;KIF21A;ZNF521;ANKS1B;GARNL3;PPFIA2;KIRREL3;MAGI1;WSB1;TMEM178B;DCC;LRRC49;KCNH8;MAGI2;EBF1;RFX3;FRMD4A;ANK3;PGM2L1;FOXP2;IFT81;AMPH;ZNF397;CHRNA7;GREB1L;TPTE2P2;NREP;EFNA5;PHF21B;FGD4;STOX2;GTF2IP1;NCAM1;CTNNA2;SRGAP3;PAK3;ZNF423;LINGO2;ZNF462;MYEF2;AUTS2;NEGR1;ST8SIA1;ST8SIA2;NTRK3;PBX3;LSAMP;PBX1;MAPK10;CCDC88A;PPP2R2B;TTC3;FAT3;KIAA1958;LHX9         |
| KLF7 human tf ARCHS4 coexpression   | 66/299 | 9.241681330475861E-5 | ROBO2;DRAXIN;MYT1L;PTPRO;CELF4;ELAVL4;GRIK1;GRIK2;BICD1;GPHN;GRIP1;ZNF608;DPYSL5;TRIM2;AKT3;DNER;ZNF449;KIF21A;RALGPS1;PPFIA2;WSB1;RBFOX2;DCC;RC3H1;RFX3;ANK3;ZDHHC17;PGM2L1;LRRC7;ALPK3;XPR1;EXOC1;DEFB103A;GRIA1;RTN1;ATL1;RASA L2;NREP;KALRN;STOX2;GNG2;ZNF627;MYH13;TNNT1;APBB2;NCAM1;CTNNA2;SRGAP3;PAK3;PAK5;MBD5;OSBPL6;CADM1;AUTS2;ST8SIA2;MYO5A;UBE2G1;SYNJ2;DCLK1;ST18;CCDC88A;TTC3;YPEL1;TCF4;FSIP1;FBXL7                            |
| ZNF608 human tf ARCHS4 coexpression | 66/299 | 9.241681330475861E-5 | GABRB3;RERE;SH3GL3;DRAXIN;TENM3;TENM4;CTNND2;ELAVL4;ROBO1;CDH4;DACH1;CDH2;DPYSL5;PEG10;TRIM2;HYDIN2;NEO1;PPFIA2;MAGI1;WSB1;RBFOX2;TMEM178B;RFX3;FRMD4A;TNKS;GREB1L;ILDR2;NREP;KALRN;PHF21B;STOX2;CECR2;FLRT2;ZNF704;HECTD4;NCAM1;CTNNA2;SRGAP3;PAK3;ZNF423;MPDZ;PLXNA4;MAP4K4;BPTF;LRRC37A3;ZNF462;AUTS2;ST8SIA2;YLPML1;ESRRG;PTPN13;DCLK1;PBX1;PTPRD;CCDC88A;SDK1;NBEA;APC;ZNF618;ASXL3;TTC3;TCF4;KIAA1958;EIF4G3;ADGRL2;TBATA                |
| ZBTB41 human tf ARCHS4 coexpression | 66/299 | 9.241681330475861E-5 | PCSK2;ROBO2;ERO1B;TUSC3;PCMTD2;TRIM9;SCGN;ZSCAN30;TRIM2;PPP6R3;LONP2;PCMTD1;TTC37;WSB1;DST;CACNA2D1;SLC2A13;LRRC49;VPS13C;RFX3;FNDC3A;SEZ6L;PJA2;CACNB2;MMP16;MYO3A;PIGK;FICD;SAR1A;STXBP4;TNKS;BTF3L4;UBR1;NOL4;NALCN;NR2C1;TTR;TTC21B;SYNDIG1;PAK3;EVI5;MON2;PTPRN2;NDFIP1;ABCA5;CADPS;SYT16;CDC42BPA;ELL2;OXR1;ST18;MOB1B;MAPK10;ITCH;NBEA;APC;ASXL3;TTC3;VPS41;CNTN1;CPE;CNTN4;SCN2A;PTPN4;LRP12;CPEB4                                     |
| ZNF521 human tf                     | 66/299 | 9.241681330475861E-5 | ZNF573;CHRM3;DRAXIN;TENM3;WNT2B;TENM4;CTNND2;CELF4;LDLRAD3;CDH9;CDH8;TTC28;ZNF608;DACH1;CDH2;DPYSL5;PSD3;CALN1;WSB1;RBFOX2;DCC;LRRC49;T                                                                                                                                                                                                                                                                                                        |

|                                                   |        |                           |                                                                                                                                                                                                                                                                                                                                                                                                                                            |
|---------------------------------------------------|--------|---------------------------|--------------------------------------------------------------------------------------------------------------------------------------------------------------------------------------------------------------------------------------------------------------------------------------------------------------------------------------------------------------------------------------------------------------------------------------------|
| ARCHS4<br>coexpressi<br>on                        |        |                           | CF12;RFX3;EML1;PYGO1;IFT81;ST6GALNAC3;ASTN1;ZNF397;KHDRBS2;CHRNA7;GREB1L;ILDR2;NREP;HERC2P9;NPAS3;STOX2;CAMTA1;NCAM1;TSPAN3;CTNNA2;SRGAP3;SLIT2;ZNF423;MPDZ;TRPM3;JAM2;WASF3;TMEM132C;MYEF2;AUTS2;ANGPT1;PBX3;PBX1;PTPRD;MAPK10;NELL2;MEIS1;ZNF618;COL5A3;TTC3;YPEL1;KIAA1958;SSBP2;ADGRL2                                                                                                                                                 |
| HIVEP2<br>human tf<br>ARCHS4<br>coexpressi<br>on  | 65/299 | 1.761921089<br>4916884E-4 | CYFIP2;MAML2;ATP8A1;FRMPD4;DOCK9;DOCK8;RASGRF2;RORA;DOCK10;RPH3A;AKAP13;AKAP11;HERC1;MPRIIP;PSD3;DLGAP1;MAP3K5;KCNH1;ARHGEF11;RBFOX1;MBNL1;PRKCH;PRKCB;PRKCE;VPS13C;TMOD2;ARAP2;IPCEF1;SYN2;ITPKB;PACS1;MADD;KCNQ5;WDFY3;RAPGEF5;UTRN;DOCK2;NGEF;KDM7A;MACF1;NFAT5;SLC1A2;IQGAP1;RASGRP1;KIAA0513;CACNA1I;GRIN2A;PCNX1;ABLM1;ATXN1;SV2B;HECTD4;CREBBP;BCL11B;IQSEC1;ERBIN;MYO5A;PDE4DIP;LNPEP;ATP2B2;ARHGAP26;SMARCA2;GRIN2B;SYNJ1;PPP2R2C |
| ZHX1 human<br>tf ARCHS4<br>coexpressi<br>on       | 65/299 | 1.761921089<br>4916884E-4 | PCSK2;LIN54;ERO1B;ABCD3;ZFYVE9;CPQ;USP32;LAMC3;RAB22A;SCGN;EFR3A;AKAP11;TRIM2;PSD3;ANKRD31;LONP2;BCAP29;KIF21A;DIP2B;SOX6;DIP2C;SCAPER;PCMTD1;PPFIA2;MBNL2;ARHGEF12;MUSK;DST;ARL15;ZNF160;FNDC3A;ITFG1;TANC2;PJA2;CMPK1;WDFY3;ARHGEF7;MICU1;ZMYND11;STX12;ZDHHC21;SLC30A10;NOL4;SNTG2;HECTD1;FCHO2;GSE1;MAPK1;ATP9A;MON2;NDP1;ABCA5;ERBIN;SYT16;CDC42BPA;ELL2;MOB1B;ARHGAP32;SYNJ1;APC;TTC3;CNTN1;CCSER2;SPIRE1;CPE                        |
| ZKSCAN2<br>human tf<br>ARCHS4<br>coexpressi<br>on | 65/299 | 1.761921089<br>4916884E-4 | TENM4;ZFYVE9;ZBTB21;ELAVL4;PSIP1;KIF11;BICD1;TXNDC16;GLI3;PTPRG;ROBO1;ZNF608;CDH2;DPYSL5;TRIM2;AKT3;DNER;SACS;SMARCA1;KIF21A;NEO1;MAGI1;SUPT16H;WSB1;RBFOX2;CSNK2A1;DCC;CACNA2D1;RFX3;NBPF1;MSH6;ADGRB3;DOK5;MPPED2;ZNF678;ST6GALNAC3;GREB1L;NREP;EHBP1;PHF21B;STOX2;FUT9;ZNF704;CLVS2;DROSHA;NCAM1;RPRD1A;SRGAP3;MPDZ;VAT1L;BPTF;ZNF462;FARP1;MYEF2;AUTS2;ST8SIA2;YLP1;PUM1;BTBD10;PBX1;PLEKHA8;PTPRD;CCDC88A;FAT3;ADGRL2                 |
| ZFP1 human<br>tf ARCHS4<br>coexpressi<br>on       | 65/299 | 1.761921089<br>4916884E-4 | ELAVL4;GRIK2;BICD1;TPGS2;ROBO1;CDH2;DPYSL5;LRRTM4;TRIM2;DNER;PHACTR3;KIF21A;PPFIA2;RGS7;WSB1;RBFOX2;RFX3;FOXP2;PYGO1;FRMD5;IFT81;ADGRB3;DOK5;MPPED2;IL1RAPL1;XPR1;MAGEL2;NLGN1;RTN1;STAU2;TNKS;BTF3L4;NRXN3;NREP;NOL4;MAPK8;GNG2;FUT9;ZMAT4;CLVS2;CTNNA2;SRGAP3;PAK5;OPCML;CLVS1;ATF7IP;CADM2;ST8SIA2;RANBP17;PBX3;LSAMP;KLHL1;ESRRG;BTBD10;PTPRD;MAPK10;CCDC88A;NFIA;NBEA;APC;NFIB;KLHL7;TTC3;ZNF536;MDGA2                                |
| ARX human<br>tf ARCHS4<br>coexpressi<br>on        | 64/299 | 3.216606335<br>2786627E-4 | PCSK2;ROBO2;ERO1B;TUSC3;PTPRO;ELAVL4;HS6ST3;SCGN;GRM7;DPYSL5;TRIM2;ZNF846;PLCE1;SOX6;RGS7;ANKRD36C;PACRG;KCND3;LRRC49;MAGI2;HUNK;CACNB2;MMP16;MPPED2;VSTM2A;PDE1A;BTF3L4;NRXN3;RGPD5;NREP;NOL4;SLC7A2;MTMR7;NPAS3;GNG2;TTR;SNTG1;NCAM1;PAK3;CORIN;AKAIN1;PRELID2;RIC3;ANKRD26;PTPRN2;MYEF2;CADPS;POU6F2;ELL2;ST18;DCDC1;MOB1B;MAPK10;CCDC88A;KLHL7;ASXL3;TTC3;CNTN1;ZNF536;CPE;TCF4;CNTN4;FGF12;XKR5                                       |
| RFX3 human<br>tf ARCHS4<br>coexpressi<br>on       | 64/299 | 3.216606335<br>2786627E-4 | FANK1;SPAG16;OSCP1;ELAVL4;EFCAB6;TRIM9;ZNF608;DACH1;CDH2;DPYSL5;LRRTM4;TRIM2;SNAPC3;HYDIN;KIF21A;MAGI1;WSB1;ADGRV1;DCC;LRRC49;TCF12;IFT81;LRRC7;ASTN1;CFAP61;GRIA1;DNAH3;TNKS;DNAH6;GREB1L;ILDR2;AKAP6;DNAH9;NREP;NOL4;NPAS3;STOX2;GNG2;FUT9;TMEM67;TSPAN3;CTNNA2;CSMD3;SRGAP3;SLIT2;PAK3;ZNF462;NTRK2;MYEF2;AUTS2;CFAP70;VWA3B;DCLK1;PTPRD;TMEM232;MAPK10;NELL2;CCDC88A;APC;FABP7;TTC3;FAT3;SSBP2;PPIL6                                   |
| NEUROD6<br>human tf                               | 64/299 | 3.216606335<br>2786627E-4 | TCERG1;CNTNAP2;ZNRFP2P2;MYT1L;PTPRO;GRIK3;RORB;BICD1;SRGAP2C;SLC22A14;NHSL1;ADAMTS3;TRIM2;AKT3;TMEM108;PHACTR3;SOX5;RGS7;EPHA7;RBFOX2;CA                                                                                                                                                                                                                                                                                                   |

|                                                  |        |                           |                                                                                                                                                                                                                                                                                                                                                                                                                                                                 |
|--------------------------------------------------|--------|---------------------------|-----------------------------------------------------------------------------------------------------------------------------------------------------------------------------------------------------------------------------------------------------------------------------------------------------------------------------------------------------------------------------------------------------------------------------------------------------------------|
| ARCHS4<br>coexpressi<br>on                       |        |                           | MLG;KAZN;EML1;MPPE1;LRRC7;HECW1;KCNQ3;RAPGEF2;ZFPF2;XPR1;SHANK2;LINC00643;GRIA1;SLC24A2;CTTNBP2;NREP;NYAP2;NOL4;CACNA1E;AP5M1;PCBP3;PAK5;OPCML;CLVS1;OSBPL6;BCL11B;SIAH3;NTRK3;SORBS2;CORO2B;ST18;PTK2;SNAP91;NELL2;DAB1;NFIA;NBEA;APC;NFIB;PPP2R2B;TTC3;TCF4;SSBP2;LRP12                                                                                                                                                                                       |
| ETV5 human<br>tf ARCHS4<br>coexpressi<br>on      | 64/299 | 3.216606335<br>2786627E-4 | SEMA5A;GLDC;LDLRAD3;FMN1;KIF11;KIF15;PTPRG;EP<br>S8;GRM3;SRGAP2C;SPRED2;TUBB6;ARHGAP42;SPRED1;<br>NHSL1;PSMD2;NUF2;BCAP29;HMCN1;STK32A;TEAD1;SR<br>GAP2B;SUPT16H;CSNK2A1;KCND3;TCF12;FNDC3B;RC3H<br>1;MITF;SEZ6L;EPN2;ENAH;TANC1;MELK;FRMD6;DOCK1<br>;CHST3;EXOC1;RAI14;MTMR2;SHC3;ILDR2;ASAP2;C10<br>ORF90;SDCBP;MGAT5;ARNT2;STARD13;EFL1;MYO5A;HM<br>GA2;UBE2G1;NETO2;SYNJ2;GNG12;CDC42BPA;CORO2B;<br>NDC80;ANLN;PPFIBP1;DPY19L1;FABP7;SPIRE1;FBXL7           |
| FOXE1<br>human tf<br>ARCHS4<br>coexpressi<br>on  | 64/299 | 3.216606335<br>2786627E-4 | DOCK5;PATJ;ATP8A1;DOCK9;CPQ;GALNT18;KIAA1671;<br>PTPRM;SYNE2;AKAP13;MPRIIP;KIF13A;GTF2I;KRT6A;C<br>AST;ARHGEF12;COL23A1;RIPK4;ARAP2;WDR72;KIAA12<br>17;TOM1L2;TANC1;GOLGA8B;FNDC1;BIRC6;MXRA7;UTR<br>N;DOCK1;MET;DGKI;FKBP5;ITGA9;YAP1;NOTCH2;MACF<br>1;SEMA3D;SDC2;ARHGEF28;GLIS3;NTN4;LRP2;RAP1GA<br>P;THSD4;HECTD1;ABL1;FLNB;CDH26;CTNNAL1;ZBTB7C<br>;STARD13;ZBTB16;ZNF804B;FAM189A2;CYBRD1;SORBS<br>2;MYO9A;LRP1B;ARHGAP31;TG;MYO5B;GGT3P;ATP13A3<br>;FBN1 |
| ZNF300<br>human tf<br>ARCHS4<br>coexpressi<br>on | 64/299 | 3.216606335<br>2786627E-4 | SLC44A5;DRAXIN;USP33;PTPRO;ELAVL4;GRIK2;TXNDC<br>16;CDH8;TPGS2;ROBO1;GRIP1;NHSL1;CDH2;GRM7;DPY<br>SL5;PPIP5K2;TRIM2;PHACTR3;SMARCA1;KIF21A;PPF<br>IA2;WSB1;RBFOS2;ARL15;LRRC49;TCF12;MAGI2;RFX3<br>;ITFG1;PGM2L1;IFT81;LRRC7;PDZRN4;XPR1;GRIA1;R<br>TN1;STAU2;BTF3L4;NRXN3;NREP;NOL4;STOX2;MAPK8;<br>GNG2;ZNF627;NCAM1;CTNNA2;PAK5;MYEF2;CADM1;ST8<br>SIA2;ZNF804B;PBX3;LHFPL3;PTPRD;MAPK10;CCDC88A<br>;RALYL;APC;KLHL7;TTC3;CCSER1;TCF4;SSBP2                  |
| TOX human<br>tf ARCHS4<br>coexpressi<br>on       | 64/299 | 3.216606335<br>2786627E-4 | ROBO2;DRAXIN;ELAVL4;GRIK2;CDH8;DACH1;DPYSL5;T<br>RIM2;SH3GL2;GARNL3;WSB1;LRRC49;TCF12;MAGI2;RF<br>X3;ZDHHC17;IFT81;ADGRB3;MAPRE2;XPR1;ANKRD36B;<br>ASTN1;CRB1;MAGEL2;KHDRBS2;RTN1;PDE1A;BTF3L4;N<br>RXN3;NREP;NOL4;NKAIN3;PDCD6IPP2;GNG2;SNTG1;FU<br>T9;DPH6;NCAM1;TSPAN3;CTNNA2;SRGAP3;PAK3;JAM2;<br>GRIA4;GABRA2;ATF7IP;CA10;MYEF2;ST8SIA1;ST8SIA<br>2;PBX3;SLC4A10;MAPK10;NELL2;AGBL4;LRFN5;RALYL<br>;APC;KLHL7;TTC3;ZNF536;SSBP2;FGF12;LRP12                |
| DACH1<br>human tf<br>ARCHS4<br>coexpressi<br>on  | 63/299 | 5.921402795<br>91383E-4   | ROBO2;DRAXIN;TENM4;CTNND2;CELF4;ELAVL4;RIMS2;<br>GRIP1;CDH4;ZNF608;CDH2;DPYSL5;EPHB2;ZNF521;PP<br>FIA2;DCC;LRRC49;KCNH8;MAGI3;EBF2;RFX3;PGM2L1;<br>HECW1;PRR16;CNTNAP5;PPM1L;CHRNA7;TSHZ2;GREB1L<br>;NREP;KALRN;NPAS3;PHF21B;STOX2;GTF2IP1;PDCD6I<br>PP2;NCAM1;CTNNA2;SRGAP3;PAK3;ZNF423;LRRC4C;JA<br>M2;CLVS1;ZNF462;PTPRN2;MYEF2;ST8SIA1;ST8SIA2;<br>CADPS;PBX3;ST18;PBX1;PTPRD;MAPK10;CCDC88A;ZNF<br>618;AGO1;ASXL3;TTC3;KIAA1958;VSX1;LHX9                  |
| ARNT2<br>human tf<br>ARCHS4<br>coexpressi<br>on  | 63/299 | 5.921402795<br>91383E-4   | DOCK3;FRMPD4;MYT1L;CTNND2;RPH3A;TRIM9;GRM5;TR<br>IM2;MCF2L;PSD3;DLGAP1;KCNH1;RBFOS1;TMEM178A;T<br>MOD2;FAM219A;SYN2;MAPK8IP1;GABRG1;AJAP1;CNKSR<br>2;MPPE1;SCN8A;ADGRB1;RAPGEF5;NGEF;ASTN1;RAPG<br>EF4;SHC3;STXBP1;SLC1A2;KALRN;RAP1GAP;KIAA0513<br>;CTIF;GRIN2A;PGBD5;SV2B;GNG7;NCAM1;CTNNA2;GPR<br>158;ATP9A;WASF3;OPCML;GABBR2;NDFIP1;DTNA;SYT1<br>;CADM2;NTRK3;KIAA1549L;MYO5A;ATP2B2;CORO2B;DC<br>LK1;SNAP91;DLG2;PPP2R2C;RCAN2;CNTN1;SCN2A;APB<br>A2      |
| ZNF354B<br>human tf<br>ARCHS4                    | 63/299 | 5.921402795<br>91383E-4   | DIDO1;DOCK5;TRIO;DPY19L2P2;BACH1;ANTXR1;RPTOR<br>;AKAP13;POTEM;PTAR1;HERC2;C16ORF72;HERC1;ZNF4<br>07;SACS;ARHGEF12;VPS13C;PDE4D;VPS13B;URB1;PEA<br>K1;WDPCP;RELL1;WDFY3;BIRC6;UTRN;MCTP2;NOTCH2;                                                                                                                                                                                                                                                                |

|                                                  |        |                           |                                                                                                                                                                                                                                                                                                                                                                                                                         |
|--------------------------------------------------|--------|---------------------------|-------------------------------------------------------------------------------------------------------------------------------------------------------------------------------------------------------------------------------------------------------------------------------------------------------------------------------------------------------------------------------------------------------------------------|
| coexpressi<br>on                                 |        |                           | MACF1;NFAT5;NBAS;KMT2C;ITPR2;LPP;ATXN3;PCNX1;KIAA1328;HECTD1;HECTD4;TRPM7;ATP9B;USP24;ZFXH3;ST8SIA1;LRBA;TRAPPC10;MGA;MOCOS;MICAL3;ERBIN;FANCA;MTOR;MED13L;TMPRSS15;MYO1E;NEDD4;SLMAP;AGO2;DMXL2;SP3;FAT1;CDK12;KIAA0825                                                                                                                                                                                                |
| SCAPER<br>human tf<br>ARCHS4<br>coexpressi<br>on | 63/299 | 5.921402795<br>91383E-4   | PCSK2;ROBO2;DPP10;ERO1B;MYT1L;ANKRD36;CHD9;FRG1HP;EFCAB6;RIMS2;UNC80;GRM7;ZSCAN30;LRRTM4;ADAMTSL3;KIF21A;ZNF568;ANKS1B;ANKRD36C;TMEM178B;MAGI2;OPRM1;SEZ6L;ARID1B;DNM3;LRRC7;ASTN2;ANKRD36B;SDCCAG8;LUZP2;PCDH15;RGPDP6;RGPDP5;ILDR2;RASAL2;MTMR7;MIPOL1;AK9;SNTG2;TTR;SNTG1;ZNF704;ANKRD20A5P;ANKRD36BP2;NCAM1;SRGAP3;PAK3;CORIN;BPTF;RIC3;CDC1;TTLL7;MAPK10;CCDC88A;FER;NBEA;ASXL3;TTC3;TCF4;CNTN4;PTPN4;ASB3;CCDC171 |
| RARB human<br>tf ARCHS4<br>coexpressi<br>on      | 62/299 | 0.001053665<br>0874352492 | SEMA5A;RYR2;BNC2;ZFYVE9;SYCP1;PTPRM;SLC2A3;LDB2;SLC8A1;ROBO1;ARHGAP42;CDH2;RGS8;DIRC3;RNF152;TEAD1;ADAMTS9;PRKG1;KCNH1;POSTN;MUSK;TPM1;WDR72;DKK2;CNKSR2;TANC1;AGPS;ALPK2;TLN2;ST6GALNAC3;FREM1;DOCK1;KANK4;TRABD2B;DGKI;DDR2;RAI14;FBN2;FOCAD;SAR1A;SEMA3D;SEMA3E;RANBP3L;FLRT2;ERBB4;ALX4;ZNF423;RXRG;MPDZ;STARD13;CNTN5;NEBL;TXNRD2;PCDH7;LAMB1;GNG12;MCC;PTPN13;ARHGAP24;TJP1;DLC1;SNAI2                            |
| EBF3 human<br>tf ARCHS4<br>coexpressi<br>on      | 62/299 | 0.001053665<br>0874352492 | APP;DRAXIN;MYT1L;CTNND2;CELFL4;ELAVL4;XYLT1;SLC6A3;ROBO1;ZNF608;DACH1;DPYSL5;PEG10;DNER;KIF21A;KIF21B;EPHB2;NEO1;CHST8;RBFOX2;DCC;CACNA2D1;EBF1;AFAP1;EBF2;GFRA1;AJAP1;ELF2;PDZRN4;PPM1L;NTM;NREP;NYAP2;KALRN;NPAS3;PHF21B;STOX2;GTF2IP1;GNG2;NCAM1;CTNNA2;SRGAP3;ZNF423;ATP9A;MAP4K4;KCNJ6;NDFIP1;MYEF2;AUTS2;ST8SIA2;PLCL1;PBX3;LSAMP;DCLK1;PBX1;ENOX1;PTPRD;CCDC88A;ZNF618;ZNF536;FAT3;APBA2                         |
| NR3C1<br>human tf<br>ARCHS4<br>coexpressi<br>on  | 62/299 | 0.001053665<br>0874352492 | PI4K2B;TRIO;ANKRD33B;ATP8A1;SH3KBP1;DOCK8;EFCAB14;IKZF2;BACH1;LYST;FAM107B;DOCK10;AKAP13;EFR3A;HERC1;KIF13A;DIP2B;LRRFIP1;MAP3K5;CAST;CD96;MBNL1;ITGA4;PRKCB;VPS13C;ARAP2;APBB1IP;TRAF3;DPYD;AGPS;BIRC6;UTRN;DOCK2;WDFY4;KDM7A;NOTCH2;WDR26;ITPR2;IQGAP1;SAMS1;PCNX1;BTAF1;RAP1A;ATXN1;BTLA;SUSD6;HIVEP2;LYN;USP24;TRAPPC10;NEK6;RFTN1;NEK7;ERBIN;LNPEP;DNAJC13;SMARCA2;MED13L;MYO1E;ARHGAP31;SP3;ATP13A3               |
| RREB1<br>human tf<br>ARCHS4<br>coexpressi<br>on  | 62/299 | 0.001053665<br>0874352492 | DIDO1;PATJ;DOCK8;KIAA1671;LIMD1;SIPA1L3;CABIN1;RPTOR;AKAP13;HERC2;HERC1;ZNF407;LRRFIP1;MAP3K5;RBM33;NUP214;VAV3;MBNL1;ITGA4;SFM2T2;VPS13C;FNDC3B;VPS13B;URB1;ARID1B;RUNX1;NCOR1;BMP2K;WDPCP;BIRC6;PPARA;UTRN;DOCK2;WDFY4;MACF1;NFAT5;CTDP1;KMT2C;ITPR2;LPP;PCNX1;KIAA1328;HECTD1;CUX1;TRPM7;ATP9B;MDN1;USP24;SPEN;CREBBP;ATP8B4;LRBA;TRAPPC10;MGA;LNPEP;SMARCA2;PHC3;PARP15;MED13L;DIAPH1;AGO2;CDK12                    |
| ZNF81<br>human tf<br>ARCHS4<br>coexpressi<br>on  | 62/299 | 0.001053665<br>0874352492 | MCTP1;THSD7B;ATP8A1;DOCK8;USP33;LYST;MYSM1;RAB22A;AKAP13;NIPBL;RASSF2;C16ORF72;HERC1;JAK2;TRPC7;MBNL1;VPS13C;VPS13B;FAM126B;PJA2;PHF20L1;KCNQ3;WDFY3;BIRC6;UTRN;DOCK2;MCTP2;KDM7A;CNTNAP5;MACF1;NFAT5;NLGN1;KMT2C;THADA;UBR1;FGD4;PCNX1;MAPK8;BTAF1;CECR7;FCHO2;ANKRD36BP2;TRPM7;ST8SIA6;BPTF;AKAIN1;ARFGEF1;USP24;RABGAP1L;MBD5;FANCM;LRBA;MGA;PBX3;KLHL1;ERBIN;SYT16;LNPEP;SMARCA2;PHC3;DMXL2;CCDC171                 |
| ZC3H6<br>human tf<br>ARCHS4<br>coexpressi<br>on  | 62/299 | 0.001053665<br>0874352492 | CCDC122;CRYBB2P1;MYT1L;ANKRD36;DPY19L2P2;GADL1;ZBTB20;EFCAB6;MYLK3;RIMS2;UNC80;CCDC91;RPS6KA5;HERC1;ZSCAN30;CA5A;ADAMTSL3;MACROD2;NOS1;ANKS1B;PCMTD1;POTEC;USP8;ANKRD36C;MAGI2;VPS13B;ANK3;FAM126B;SHISA9;ARID1B;NCOR1;LRRC7;PEAK1;CNKSR3;WDPCP;ASTN2;ANKRD36B;SDCCAG8;RGPDP5;M                                                                                                                                         |

|                                              |        |                           |                                                                                                                                                                                                                                                                                                                                                                                                       |
|----------------------------------------------|--------|---------------------------|-------------------------------------------------------------------------------------------------------------------------------------------------------------------------------------------------------------------------------------------------------------------------------------------------------------------------------------------------------------------------------------------------------|
|                                              |        |                           | <i>IPOL1;STK3;FGD4;DPP6;KIAA1328;ANKRD36BP2;SRGAP3;ATP9B;LRRC37A3;MBD5;SLC14A2;NTRK3;ADAM32;ARRHGAP28;MYO9A;DCDC1;TTC39B;TTLL7;TMEM116;NEDD4;TTC3;ASB3;TNRC6B</i>                                                                                                                                                                                                                                     |
| RC3H2<br>human tf<br>ARCHS4<br>coexpression  | 61/299 | 0.001898866<br>1313926161 | <i>TRIO;FRY;PITPNC1;SYNE2;CEP128;C16ORF72;AKAP11;HERC1;TRIM2;PSD3;SACS;DIP2B;JAK2;ACTR2;USP7;ARHGEF12;KSR1;DST;NSUN2;VPS13C;PDE4D;FRMD4B;TANC2;HADHB;TBC1D5;FAR1;WDFY3;BIRC6;ZMYND11;DGKI;DTHD1;MACF1;MTPN;NFAT5;RABGAP1;WDR26;ASAP2;AMBRA1;FAM214A;PCNX1;MAPK8;LARP1;ATXN1;HECTD1;HIVEP2;ATP9A;ARFGEF1;USP24;LRBA;TRAPPC10;MGA;ERBIN;MYO5A;LNPEP;TRAPPC8;DNAJC13;KIAA0232;MED13L;APC;SP3;FAT1</i>    |
| ZNF781<br>human tf<br>ARCHS4<br>coexpression | 61/299 | 0.001898866<br>1313926161 | <i>SLC44A5;ROBO2;MYT1L;PTPRO;CHRM5;ELAVL4;SLC35F1;C12ORF40;EFCAB6;PTPRG;SRGAP2C;SYNPR;GRM7;TRIM2;KIF21A;SOX6;SRGAP2B;BBS4;ANKS1B;ANKRD36C;WSB1;LRRC49;TMOD2;MAGI2;SEZ6L;TIAM2;MMP16;LRRC7;VSTM2A;CRB1;ATL1;BTF3L4;NREP;NOL4;GNG2;SNTG1;SRGAP3;JAM2;PAK5;GRIA4;CLVS1;RFTN2;ATF7IP;SLAH3;ST8SIA2;RANBP17;SORBS2;NBEA;APC;NFIB;TMEM116;KLHL7;ASXL3;TTC3;YPEL1;ZNF536;TCF4;SSBP2;KIAA0825;ASB3;XKR5</i>   |
| HIF1A<br>human tf<br>ARCHS4<br>coexpression  | 60/299 | 0.003331025<br>1820726443 | <i>NRP1;DOCK5;TRIO;C2CD2;ECE1;PTPRK;BACH1;GALNT10;TUBB6;ALCAM;C16ORF72;TEAD1;ADAMTS9;CAST;IL1R1;FNDC3B;AFAP1;ADAM10;FRMD6;LATS2;DPYD;CDC42EP3;DOCK1;MET;CD44;VCL;CHST3;DDR2;RAI14;YAP1;NOTCH2;GRAMD1B;WDR26;SEMA3C;NTN4;IQGAP1;FSTL1;LTBP1;PCNX1;DRAM1;ARSJ;FAM180A;ABL2;SNX9;FLNB;CTNNA1;NEK7;CRIM1;DNAJC13;LAMB1;SYNJ2;GNG12;EXT1;MYO1E;COL5A1;FAT1;ITGBL1;SNAI2;ATP13A3;FBN1</i>                   |
| NR2C2<br>human tf<br>ARCHS4<br>coexpression  | 60/299 | 0.003331025<br>1820726443 | <i>RERE;DIDO1;TRIO;DOCK8;LIMD1;MYSM1;CABIN1;RPTOR;AKAP13;NIPBL;PTAR1;HERC2;HERC1;MPRIP;NPIPA1;DIP2B;GTF2I;RBM33;ARHGEF11;MBNL1;ARHGEF12;PRKCB;VPS13C;VPS13B;URB1;PACS1;MADD;WDFY3;BIRC6;UTRN;DOCK2;KDM7A;NOTCH2;MACF1;NFAT5;WDR26;KMT2C;HERC2P2;PCNX1;BTAF1;HECTD1;MAN2A2;HECTD4;MAPK1;HIVEP2;USP24;SPEN;CREBBP;MON2;LRBA;TRAPPC10;MICAL3;ERBIN;LNPEP;SMARCA2;MTOR;MED13L;DIAPH1;SP3;CDK12</i>        |
| POU3F4<br>human tf<br>ARCHS4<br>coexpression | 60/299 | 0.003331025<br>1820726443 | <i>DRAXIN;CHD9;CTNND2;ELAVL4;MSANTD4;DACH1;CDH2;DPYSL5;KIF21A;EPHB2;WSB1;RFXO2;ADGRV1;CAMK1D;LRRC49;KCNH8;TCF12;RFX3;KCTD1;GAB4;PCCA;ADGRB3;MPPED2;GRIA1;CHRNA7;NTM;GREB1L;NREP;NPAS3;PHF21B;STOX2;MAPK8;NKAIN3;GNG2;MVB12B;CAMTA1;NCAM1;CTNNA2;SRGAP3;ZNF423;LRRC4C;JAM2;FOXB1;ZNF462;NTRK2;MYEF2;AUTS2;ST8SIA2;PTCH1;PLCL1;PBX3;PBX1;ENOX1;PTPRD;MAPK10;CCDC88A;FABP7;TTC3;FAT3;TCF4</i>            |
| CLOCK<br>human tf<br>ARCHS4<br>coexpression  | 59/299 | 0.005378037<br>9169078    | <i>PATJ;RNF11;ZFYVE9;KDM1B;OSBPL10;SRGAP2C;EFR3A;PPP6R3;LONP2;TEAD1;UNC13C;ARHGEF12;DST;SLC2A13;FNDC3B;VPS13B;TANC2;KIAA1217;PEAK1;FEZ2;PLIN2;WDFY3;CD44;NFAT5;PRKAA2;KMT2C;RGPD6;PRICKLE2;ASAP1;RASAL2;FAM214A;LPP;AURKA;NLRP8;HECTD1;ARSJ;NLRP4;TRPM7;MAP4K3;ARFGEF1;ABCA5;MGA;DENND4C;KIAA1549L;DNAJC13;CDC42BPA;ELL2;MYO9A;PTK2;EXT1;TJP1;MOB1B;NLRP13;PPFIBP1;FGF14;SYNJ1;SLMAP;SPIRE1;CPEB4</i> |
| DMTF1<br>human tf<br>ARCHS4<br>coexpression  | 59/299 | 0.005378037<br>9169078    | <i>ANKRD36;CHD9;USP33;SMG1P5;C12ORF40;MYSM1;BICD1;RYR3;SYNE2;PCMTD2;SENP6;AKAP13;NIPBL;C16ORF72;HERC1;ZSCAN30;PIIP5K2;LUC7L;ANKRD36C;VPS13C;VPS13B;FAM126B;ARID1B;GOLGA8B;BIRC6;ASTN2;ZMYND11;MCTP2;ALG10B;CREB5;MACF1;TNKS;KMT2C;RGPD5;HERC2P9;MIPOL1;SCAF8;BTAF1;KIAA1328;ATP9B;BPTF;USP24;ATF7IP;MBD5;RANBP17;ADAM32;LNPEP;PHC3;PARP15;MLLT10;FER;APC;KANSL1;CEP83;PKN2;</i>                       |



|                                      |        |                        |                                                                                                                                                                                                                                                                                                                                                                                                        |
|--------------------------------------|--------|------------------------|--------------------------------------------------------------------------------------------------------------------------------------------------------------------------------------------------------------------------------------------------------------------------------------------------------------------------------------------------------------------------------------------------------|
|                                      |        |                        | <i>TCF4;PTPN4;ASB3;TNRC6B</i>                                                                                                                                                                                                                                                                                                                                                                          |
| EBF1 human tf ARCHS4 coexpression    | 59/299 | 0.005378037<br>9169078 | <i>DRAXIN;PTPRO;ELAVL4;BICD1;PTPRG;ROBO1;ZNF608;DACH1;DPYSL5;DNER;ANKS1B;PPF1A2;TRPC7;RBFox2;DCC;CACNA2D1;LRRC49;EBF2;UBE2E2;ANK3;ARID1B;PGM2L1;FOX2;MMP16;NAV3;HECW1;ARHGEF7;CNTNAP5;RTN1;CHRNA7;GREB1L;NREP;KALRN;PHF21B;FGD4;STOX2;NKAIN3;GNG2;NCAM1;SRGAP3;CADM1;AUTS2;PCDH9;ST8SIA2;PLCL1;PBX3;POU6F2;KLHL1;YLP1;ST18;PBX1;NEL2;CCDC88A;RALYL;TTC3;YPEL1;GALNTL6;CDK14;LHX9</i>                   |
| HEY1 human tf ARCHS4 coexpression    | 59/299 | 0.005378037<br>9169078 | <i>APP;TENM3;GALNT13;TENM4;CTNND2;GRIK4;SIP1L2;ROBO1;TRIM9;DACH1;CDH2;PEG10;AKT3;TNR;KIF21A;ADGRV1;TMEM178B;TCF12;KAZN;FAM219A;SEZ6L;MAPK8IP1;PAR3B;EPN2;COL4A2;ADGRB3;TNK1;DSCAML1;ASTN1;GRIA1;SHC3;NTM;NPAS3;FAM171A1;STOX2;CDH20;PLXNA2;LRIG1;NCAM1;FYN;TSPAN3;SRGAP3;SLIT2;MPDZ;JAM2;ATP9A;MAP4K4;ARNT2;NTRK2;NDFIP1;DTNA;MYEF2;AUTS2;LHFPL3;PXDNL;CORO2B;DCLK1;FABP7;SMOC1</i>                    |
| NR1D2 human tf ARCHS4 coexpression   | 59/299 | 0.005378037<br>9169078 | <i>MYOM1;MYLK2;RNF11;ATP8A1;ZFV9;DOCK9;RORA;LDB3;FYCO1;EFR3A;AKAP11;UBL3;SGCD;HERC1;MPRIP;PEBP4;KIF13A;MYO18B;PSD3;TEAD1;CAST;RBFox1;MBNL2;ARHGEF12;DST;CACNA2D1;VPS13C;MTUS1;TRDN;INPP4B;MYL1;ALPK3;KCNQ5;WDFY3;PRKAA2;RGPD6;ABLI1;HECTD1;NRAP;XIRP2;MAPK1;ZNF106;CTNNA3;HIVEP2;USP24;SVIL;ABCA5;AGL;NEK7;SAMD4A;ERBIN;FBXL17;PDE4DIP;LNPEP;ATP2B2;FBXO32;KCNS3;SLMAP;OSBPL1A</i>                     |
| MITF human tf ARCHS4 coexpression    | 59/299 | 0.005378037<br>9169078 | <i>MYOM1;PIGN;GADL1;PTPRM;FMN1;LDB3;LYST;EPS8;FYCO1;SPRED1;SGCD;CRTAC1;PEBP4;CHCHD6;KIF13A;MYO18B;PPP6R3;PHACTR1;PGM5;HMCN1;STK32A;TEAD1;MLIP;PDE4D;ADAM10;ANO2;TRDN;FRMD3;INPP4B;BACE2;PPP1R12B;CD44;OCA2;MTMR2;CFH;ABCB5;NPL;C10ORF90;SDCBP;CREG1;NRAP;XIRP2;ZNF106;RXRG;SVIL;PCDH7;SAMD4A;MYO5A;PDE4DIP;CABLES1;LHFPL2;GNG12;FBXO32;IGSF11;ARHGAP31;SLMAP;PDE3A;SNAI2;CCDC171</i>                   |
| ZSCAN23 human tf ARCHS4 coexpression | 59/299 | 0.005378037<br>9169078 | <i>SPAG16;ELAVL4;CWC27;PTPRG;ANKRD30BP2;CDH2;DPYSL5;TRIM2;SOX6;ZNF521;MAGI1;WDHD1;ANKRD36C;ZNF880;EPHA7;GUSBP1;WSB1;RBFox2;DCC;LRRC49;TCF12;RFX3;FAM126A;IFT81;ADGRB3;MPED2;ANKRD36B;KHDRBS2;STXBP4;TNKS;BTF3L4;GREB1L;ZNF66;NREP;NR2C1;HDAC9;GNG2;ARSJ;ZNF627;CSMD3;SRGAP3;SLIT2;MPDZ;JAM2;PAK5;RFTN2;ATF7IP;ZNF462;FANCM;ST8SIA2;RANBP17;POU6F2;PTK2;MAPK10;APC;KLHL7;TTC3;TCF4;SSBP2</i>            |
| ZNF33A human tf ARCHS4 coexpression  | 59/299 | 0.005378037<br>9169078 | <i>SPAG16;PATJ;ANKRD36;USP33;ELAVL4;RORB;BICD1;SYNE2;RIMS2;PIP5K2;LRRTM4;ADAMTS13;DNER;SCAPER;BBS4;ANKRD36C;DCC;LRRC49;KCNH8;VPS13C;VPS13B;ANK3;ZDHHC17;ARID1B;PGM2L1;PARP8;ZNF675;ANKRD36B;KDM7A;TNKS;KMT2C;NREP;NOL4;GLB1L3;MTMR7;GTF2IP1;ANKRD36BP2;PAK3;EVI5;BPTF;CLVS1;ATF7IP;RIC3;MBD5;MYEF2;ST8SIA2;PBX3;PHC3;MAPK10;CCDC88A;CLCN5;PPP2R2B;NEDD4;TTC3;CCSER1;KIAA1958;SSBP2;KIAA0825;TNRC6B</i> |
| ZNF460 human tf ARCHS4 coexpression  | 59/299 | 0.005378037<br>9169078 | <i>SMG1P2;SMG1P5;MYSM1;CDH8;C16ORF72;HERC1;CDH2;ZSCAN30;TRIM2;ZNF407;PPP6R3;SACS;WSB1;ESCO1;DST;VPS13C;PDE4D;RFX3;VPS13B;ZDHHC17;TANC2;PJA2;LRRC7;WDFY3;ZNF678;BIRC6;PIK3C3;ZNF236;UTRN;ZNF112;MACF1;NFAT5;FOCAD;TNKS;KMT2C;BTF3L4;RGPD5;RASAL2;RGPD2;FGD4;BTAF1;HECTD1;FUT9;ZNF704;ZNF627;ATP9B;GRIA4;GABRA2;MBD5;MON2;ST8SIA2;LRBA;MGA;RANBP17;LRFN5;APC;TTC3;PARGP1;TNRC6B</i>                      |
| FOXJ3                                | 59/299 | 0.005378037            | <i>REER;DIDO1;SETD2;DPY19L2P3;KDM1B;MAST2;CEP120</i>                                                                                                                                                                                                                                                                                                                                                   |

|                                                   |        |                          |                                                                                                                                                                                                                                                                                                                                                                                          |
|---------------------------------------------------|--------|--------------------------|------------------------------------------------------------------------------------------------------------------------------------------------------------------------------------------------------------------------------------------------------------------------------------------------------------------------------------------------------------------------------------------|
| human tf<br>ARCHS4<br>coexpressi<br>on            |        | 9169078                  | ,EFCAB14;MYSM1;RPS6KA3;AKAP13;NIPBL;PTAR1;HERC2;HERC1;MPRIIP;QSOX2;NEO1;RBM33;TRPC7;MBNL1;CACNA2D1;TANC2;PHF20L1;RFX7;BIRC6;PABPC1;MACF1;NFAT5;MTMR3;WDR26;KMT2C;HERC2P2;AMBRA1;MAPK8;LARP1;BTAF1;HECTD1;HECTD4;HIVEP2;USP24;SPEN;CREBBP;TRAPPC10;ERBIN;YLP1;LNPEP;AP2B1;FBXO32;SMARCA2;GATAD2B;SCAF4;MTOR;MED13L;DIAPH1;KANS1;AGO2;PKN2;CDK12                                           |
| NPAS4<br>human tf<br>ARCHS4<br>coexpressi<br>on   | 59/299 | 0.005378037<br>9169078   | PCSK2;GABRB3;PTPRT;ERO1B;DOCK3;MYT1L;TUSC3;CELF4;RIMS2;IQGJ-SCHIP1;UNC80;SCGN;HYDIN2;ERC1;RGS9;ANKS1B;ABC8;LRRC49;MAGI2;FOXP2;CACNB2;LRRC7;ZNF236;DSCAML1;LINC00643;STOML1;CTTNBP2;STXBP1;ATL1;CACNA1C;NREP;KALRN;NOL4;SLC7A2;MTMR7;DPP6;UNK;PDZD2;TTR;HECTD4;SUSD4;PAK3;ATP9A;LINGO2;ZNF462;PTPRN2;CADPS;POU6F2;SYT16;ELL2;GRIN2B;ST18;MOB1B;NELL1;MEIS1;PPP2R2B;ASXL3;CPE;CNIH3        |
| ZC3H11A<br>human tf<br>ARCHS4<br>coexpressi<br>on | 59/299 | 0.005378037<br>9169078   | DIDO1;SETD2;LPGAT1;USP32;MYSM1;RPS6KA3;AKAP13;EFR3A;NIPBL;PTAR1;C16ORF72;HERC1;KIF13A;DIP2B;GABPA;PCMTD1;GTF2I;CAST;MBNL1;USP7;ARHGEF12;VPS13C;VPS13B;WDFY3;BIRC6;UTRN;DOCK1;KDM7A;NOTCH2;MACF1;MTPN;NFAT5;MTMR3;WDR26;ROCK1;IQGAP1;PCNX1;SCAF8;ABLIM1;BTAF1;HECTD1;TRPM7;USP24;SPEN;CREBBP;EGLN3;HOMER2;LRBA;SLAH2;TRAPPC10;ERBIN;LNPEP;DNAJC13;SMARCA2;MTOR;MED13L;SLMAP;SP3;PKN2      |
| ISL1 human<br>tf ARCHS4<br>coexpressi<br>on       | 58/299 | 0.008848914<br>530534845 | PCSK2;SPAG16;ERO1B;TUSC3;SLC35F4;HS6ST3;RIMS2;SCGN;C10RF127;ACOXL;FAM3B;PLCE1;TLK1;SAMD12;SCAPER;RGS9;RGS7;ABCC8;SLC2A13;MTUS2;FNDC3A;ZDHHC14;CACNB2;CDC42EP3;MYO3A;GAS2;USP41;LINC00643;RGPD6;USH1C;RGPD5;NOL4;SLC7A2;MTMR7;TTR;SUSD4;TSPAN2;SUSD6;AKAIN1;KCNJ6;PTPRN2;ABCA5;CADPS;POU6F2;PARVB;CDC42BPA;ELL2;USH2A;ST18;MOB1B;OCLN;PLCXD3;FGF14;ASXL3;CNTN1;CPE;CNTN4;CPEB4            |
| PRRX1<br>human tf<br>ARCHS4<br>coexpressi<br>on   | 58/299 | 0.008848914<br>530534845 | NRP1;TRIO;COL14A1;CPXM2;PTPRM;ANTXR1;ADAMTSL1;FYCO1;SCGD;SH3PXD2A;RPS6KA2;KIF13A;SVEP1;TEAD1;PAMR1;PRKG1;POSTN;DST;IL1R1;FNDC3B;AFAP1;FRMD6;EVC;FNDC1;MXRA7;ALPK2;PDZRN3;DOCK1;DDR2;YAP1;NOTCH2;CEMIP;TWIST2;TMTC1;FSTL1;LTBP1;CTIF;ABL1;FAM180A;SNX9;SLIT3;SVIL;NEK7;SAMD4A;CYBRD1;PDE4DIP;DNAJC13;LAMB1;GNG12;FBXO32;EXT1;SMOC2;PPFIBP1;COL5A1;DLC1;FAT1;ITGBL1;SNAI2                  |
| RCOR3<br>human tf<br>ARCHS4<br>coexpressi<br>on   | 58/299 | 0.008848914<br>530534845 | PCSK2;SPAG16;ERO1B;LPGAT1;ATP8A1;CHD9;ZBTB20;ZNF44;EFCAB6;FRY;MYLK3;IGF1R;PCMTD2;SENP6;SCGN;CNST;HERC1;PPIP5K2;FBXO3;TLK1;PCMTD1;ABCC8;VPS13C;COMMD10;VPS13B;OPRM1;ARID1B;MYO3A;USP41;ASTN2;ZNF236;KMT2C;RGPD6;RGPD5;MGPD8;ZDHHC21;FAM214A;GRK3;TTR;ANKRD36BP2;USP24;RABGAP1L;ABCA5;PHKB;PARVB;SMARCA2;PHC3;ELL2;MOB1B;OCLN;PLCXD3;CCSER2;CPE;ASB4;ZNF354C;CPEB4;TNRC6B;CCDC171          |
| ZNF385B<br>human tf<br>ARCHS4<br>coexpressi<br>on | 58/299 | 0.008848914<br>530534845 | RERE;DOCK3;ATP8A1;CHD6;SIPA1L3;IGF1R;RPH3A;UNC80;GRM5;ZNF608;MCF2L;PSD3;DLGAP1;PPFIA2;UNC13B;CADPS2;RBF0X1;ARHGEF12;PRKCE;TMOD2;COBL;MYRIP;SYN2;KIAA1217;TOM1L2;SCN8A;ARHGEF7;RAPGEF5;UTRN;NGEF;RAPGEF4;STXBP1;DNAH5;TMPRSS2;NLK;PRKCZ;RAP1GAP;KIAA0513;SV2B;HECTD4;CLVS2;STXB6;GPR158;ATP9A;WASF3;OPCML;ZNF462;GABRA6;SYT1;HOMER2;CADM2;IQSEC1;ATP2B2;SNAP91;ARHGAP32;DLG2;PPP2R2C;HCN1 |
| ZNF84<br>human tf<br>ARCHS4<br>coexpressi         | 58/299 | 0.008848914<br>530534845 | ANKRD36;USP33;MSANTD4;GPHN;CDH2;DPYSL5;TRIM2;KIF21A;ANKS1B;PDK1;MAGI1;ANKRD36C;WSB1;HFM1;DST;LRRC49;RFX3;ITFG1;ENAH;IFT81;ADGRB3;LRRC7;ZNF234;ANKRD36B;ZNF397;CRB1;STAU2;TNKS;BTF3L4;NREP;CACNA1E;NR2C1;STOX2;GNG2;CTNNA2;SRGAP3;                                                                                                                                                        |

|                                       |        |                          |                                                                                                                                                                                                                                                                                                                                                                                                                     |
|---------------------------------------|--------|--------------------------|---------------------------------------------------------------------------------------------------------------------------------------------------------------------------------------------------------------------------------------------------------------------------------------------------------------------------------------------------------------------------------------------------------------------|
| on                                    |        |                          | PAK3;PAK5;BBS2;ZNF462;MBD5;MYEF2;ST8SIA2;TMEM132B;RANBP17;LSAMP;ENOX1;PTPRD;MAPK10;CCDC88A;NBEA;APC;KLHL7;TTC3;TCF4;PTPN4;SSBP2;CCDC171                                                                                                                                                                                                                                                                             |
| SHPRH human tf ARCHS4 coexpressi on   | 58/299 | 0.008848914<br>530534845 | CCDC122;ANKRD36;USP33;DPY19L2P2;GADL1;EFCAB6;AFF3;MYLK3;CEP128;UNC80;CCDC91;HERC1;ZSCAN30;PPIP5K2;LRRTM4;ADAMTSL3;PCMTD1;POTEC;ANKRD36C;MAGI2;VPS13B;FRMD4B;OPRM1;SHISA9;ARID1B;GAREM1;PEAK1;WDPCP;ASTN2;ZMYND11;L3MBTL4;ANKRD36B;RGPD5;ATP10B;RASAL2;GLB1L3;MIPOL1;STK3;ATXN3;KIAA1328;CECR7;ANKRD36BP2;CSMD3;ATP9B;MBD5;CEP112;SLC14A2;RANBP17;ADAM32;ARHGAP28;PARP15;CCDC88A;NEDD4;TCF4;ASB4;ASB3;TNRC6B;CCDC171 |
| YOD1 human tf ARCHS4 coexpressi on    | 58/299 | 0.008848914<br>530534845 | DOCK5;RNF11;DOCK8;SMG1P2;C12ORF42;BACH1;LYST;YBX3;AKAP13;NIPBL;PTAR1;RASSF2;CCDC91;HERC1;JAK2;RBM33;MBNL1;ITGA4;SP110;PRKCB;VPS13C;HAUS6;PARP8;ALDH1A2;DPYD;BMP2K;TRIM58;RELL1;BIRC6;UTRN;DOCK2;MCTP2;KDM7A;HEMGN;MACF1;WDR26;ROCK1;IQGAP1;PRAMENP;ADAM28;MXI1;MAPK1;RPRD1B;ASCC2;USP24;SIAH2;SETDB2;ERBIN;XPO7;LNPEP;ARHGAP26;ARHGAP24;MED13L;DIAPH1;SP3;UBE2O;CPEB4;BC L2L1                                       |
| TSC22D1 human tf ARCHS4 coexpressi on | 57/299 | 0.014210382<br>16820919  | GABRB1;MAP3K7CL;TPGS2;SYNPR;TRIM9;DPYSL5;TRIM2;MCF2L;DLGAP1;PRKACB;SH3GL2;ZNF287;WSB1;RBFOX2;TMOD2;SYN2;GABRG2;ITFG1;PJA2;FRMD3;DNM3;ADGRB3;SLC27A6;VSTM2A;MAPRE2;ASTN1;ZNF112;GRIA1;RTN1;STXBP1;PDE1A;ATL1;BTF3L4;NRXN3;NREP;PRKCZ;GNAI1;GNG2;NCAM1;TSPAN3;CTNNA2;GRIA4;GABRA2;ARNT2;NDFIP1;DTNA;SYT1;CADM2;OXR1;SNAP91;MA PK10;MEIS1;PPP2R2B;RCAN2;CNTN1;SCN2A;SSBP2                                              |
| PRDM2 human tf ARCHS4 coexpressi on   | 57/299 | 0.014210382<br>16820919  | CYFIP2;RERE;SETD2;ANKRD33B;DOCK8;AFF3;SYNE2;FAM107B;FCRLA;DOCK10;AKAP13;NIPBL;C16ORF72;AKAP11;HERC1;RBM33;MBNL1;PRKCB;VPS13C;ARAP2;VPS13B;IPCEF1;FCHSD2;BANK1;PACS1;BIRC6;UTRN;DOCK2;WDFY4;KDM7A;BLK;NFAT5;WDR26;ROCK1;KMT2C;RASGRP1;PCNX1;HECTD4;BTLA;HIVEP2;BPTF;LYN;SPEN;CREBBP;RABGAP1L;BCL11B;IQSEC1;TRAPPC10;YLP1;LNPEP;SMARCA2;PARP15;GATAD2B;SCAF4;MED13L;ARHGAP32;KANSL1                                   |
| PAX3 human tf ARCHS4 coexpressi on    | 57/299 | 0.014210382<br>16820919  | TENM3;WNT2B;DENND1A;ROBO1;ZNF608;NHSL1;DACH1;CDH2;PEG10;EPHB2;ZNF521;ANKRD6;WSB1;ADGRV1;DS T;TCF12;RFX3;PLA2G4A;PARD3B;ENAH;ANKFN1;IFT81;ADGRB3;ATF6;GRIA1;MTMR2;STXBP4;GREB1L;GLIS3;RASAL2;NR2C1;OAZ2;NPAS3;STOX2;GNG2;PLXNA2;NHS;TSPAN3;CSMD3;SRGAP3;ZNF423;LRRC4C;MPDZ;BBS2;NTRK2;MYEF2;AUTS2;ST8SIA1;RANBP17;PXDNL;PHKB;PTPN13;TMEM232;MAPK10;TTC3;FAT3;BMPR1B                                                  |
| RFX7 human tf ARCHS4 coexpressi on    | 57/299 | 0.014210382<br>16820919  | LIN54;DIDO1;SETD2;ATP8A1;PSIP1;MYSM1;NIPBL;HERC1;GNPTAB;SACS;SMARCA1;QSOX2;GTF2I;RBM33;AQ R;ITGA4;TANC2;RUNX1;FCHSD2;AGPS;GCSAML;BIRC6;PABPC1;MCTP2;MACF1;NFAT5;ANP32A;TNKS;ITPR2;SCAF8;LARP1;BTAFL1;HECTD1;FUT9;HECTD4;BPTF;USP24;SPEN;CREBBP;TRAPPC10;YLP1;XPO7;LNPEP;FOXN3;PUM1;GATAD2B;SCAF4;MED13L;PLEKHA8;MLLT10;APC;KANSL1;AGO2;SP3;CDK12;PTPN4;EIF4G3                                                       |
| SIM1 human tf ARCHS4 coexpressi on    | 57/299 | 0.014210382<br>16820919  | PCSK2;SEMA5A;MYOM1;ERO1B;PTPRQ;SLC35F4;ZBTB20;LRRC2;SCGN;FYCO1;C1ORF127;SGCD;MYO18B;SLC16A9;PCMTD1;MLIP;IL1R1;ABCC8;SLC2A13;ABCC9;TRDN;ABCA10;PLCB4;NAV3;MYO3A;GAS2;ALPK3;PRKAA2;STXBP4;GLIS3;NOL4;NALCN;SLC7A2;TTR;NRAP;SUSD4;XIRP2;TSPAN2;STXBP6;AKAIN1;PTPRN2;ABCA5;CNTN5;CADPS;PDE4DIP;PARVB;BTBD9;CDC42BPA;ELL2;MOB1B;OCLN;PLCXD3;AGBL1;ASXL3;CPE;CNTN4;CPEB4                                                  |
| MBNL3 human tf ARCHS4                 | 57/299 | 0.014210382<br>16820919  | DOCK5;RNF11;LPGAT1;DOCK8;PCSK6;SERPINA6;BACH1;LYST;SYNE2;RPS6KA3;AKAP13;NIPBL;RASSF2;HERC1;ADGRE3;JAK2;IL6R;RBM33;ABCG8;MBNL1;COL27A1;I                                                                                                                                                                                                                                                                             |

|                                                   |        |                         |                                                                                                                                                                                                                                                                                                                                                                                           |
|---------------------------------------------------|--------|-------------------------|-------------------------------------------------------------------------------------------------------------------------------------------------------------------------------------------------------------------------------------------------------------------------------------------------------------------------------------------------------------------------------------------|
| coexpressi<br>on                                  |        |                         | TGA4;VPS13C;F5;PARP8;DPYD;TRIM58;BIRC6;UTRN;DOCK2;MCTP2;KDM7A;HEMGN;MTPN;WDR26;ITPR2;IQGAP1;C2;C5;PCNX1;RELN;HECTD1;MXI1;ASCC2;A2M;LYN;USP24;RABGAP1L;STAH2;TRAPPC10;ERBIN;LNPEP;ARHGAP26;DIAPH1;SP3;SNTB1;BCL2L1                                                                                                                                                                         |
| ZCCHC11<br>human tf<br>ARCHS4<br>coexpressi<br>on | 57/299 | 0.014210382<br>16820919 | CCDC122;DRAXIN;CRYBB2P1;ANKRD36;CHD9;USP33;ELAVL4;EFCAB6;SYNE2;NIPBL;ZNF608;ZSCAN30;PPIP5K2;CA5A;ADAMTSL3;SCAPER;ZNF521;ANKRD36C;WSB1;DCC;ZNF160;LRRC49;MAGI2;RFX3;VPS13B;IFT81;NME7;WDPCP;ASTN2;ANKRD36B;ZNF397;GREB1L;TPTE2P2;RGPD5;NREP;NR2C1;MIPOL1;AK9;STK3;KIAA1328;ANKRD36BP2;SRGAP3;ATP9B;BPTF;RIC3;MBD5;ST8SIA1;MGA;ARHGAP28;CCDC88A;KANSL1;TMEM116;KLHL7;NEDD4;TTC3;ASB3;TNRC6B |
| ZC3H13<br>human tf<br>ARCHS4<br>coexpressi<br>on  | 57/299 | 0.014210382<br>16820919 | GABRB3;TCERG1;DRAXIN;TENM3;CTNND2;CELF4;ELAVL4;PSIP1;CWC27;TXNDC16;ROBO1;RIMS2;NIPBL;ZNF608;DPYSL5;ADAMTSL3;CHCHD6;LUC7L;KIF21A;ANKS1B;PPFIA2;MAGI1;RBFox2;KCNH8;FRMD4A;ANK3;PGM2L1;PEAK1;ROR1;TNIK;ANKRD36B;MTMR2;ANKRD11;CWF19L2;NREP;NPAS3;PHF21B;FAM171A1;STOX2;ZNF704;CAMTA1;CLSPN;SRGAP3;PAK3;MAP4K4;BPTF;ZNF462;MYEF2;AUTS2;YLPM1;DCLK1;PTPRD;CCDC88A;ZNF618;TTC3;KIAA1958;EIF4G3  |
| RORA human<br>tf ARCHS4<br>coexpressi<br>on       | 56/299 | 0.022025974<br>45180155 | DOCK9;DOCK8;FRY;LYST;SYNE2;DOCK10;AKAP13;HERC1;KIF13A;PCMTD1;CERS3;MBNL1;GRID2;PRKCH;MBNL2;ITGA4;VPS13C;ARAP2;VPS13B;TC2N;IPCEF1;PARP8;INPP4B;PCP4;CARD18;PRKCQ;BIRC6;ASTN2;UTRN;KDM7A;MACF1;NFAT5;RASGRP1;CACNA1I;PCNX1;ABLIM1;ATXN1;HIVEP2;KDM4C;BCL11B;ABCA5;KCNIP4;ERBIN;ADAM32;LNPEP;FOXN3;ARHGAP26;SMARCA2;PHC3;PARP15;MPP7;TTC39B;NEDD4;CCSER2;PTPN4;CEPB4                         |
| ATF2 human<br>tf ARCHS4<br>coexpressi<br>on       | 56/299 | 0.022025974<br>45180155 | GABRB3;ELAVL4;BACH1;PCMTD2;DPYSL5;TRIM2;FBXO3;KIF21A;PRKACB;PCMTD1;WSB1;DCC;VPS13C;RFX3;ZDHHC17;RUNX2;PGM2L1;PJA2;PIAS1;PYGO1;LATS2;MDFIC;LRRC7;NAA35;ZNF678;TOX;GRIA1;STX12;RTN1;STA2;TNKS;ATL1;BTF3L4;NREP;NOL4;GNAI1;MAPK8;GN2;SNTG1;CTNNA2;PAK3;CADM1;SYT1;ST8SIA2;SYT16;PUM1;OXR1;PTPRD;MAPK10;SYNJ1;APC;KLHL7;TTC3;CNTN1;TCF4;SSBP2                                                 |
| TSHZ3<br>human tf<br>ARCHS4<br>coexpressi<br>on   | 56/299 | 0.022025974<br>45180155 | NRP1;DOCK4;BNC2;PTPRO;ANTXR1;ADAMTSL1;SLC22A14;GLT1D1;SH3PXD2A;DIP2C;EPHB2;PAMR1;ARHGEF11;RBFox1;IL1R1;AFAP1;MYRIP;PGM2L1;FOX2P;TANC2;FRMD6;EVC;KCNMA1;CDC42EP3;WDFY3;MXRA7;PDZRN3;DDR2;CEMIP;TNKS;NTM;TWIST2;ASAP1;FSTL1;CACNA1E;LTBP1;CTIF;RANBP3L;FLRT2;SH3BP5;SPOCK1;CSMD2;MAP4K4;CLVS1;CA10;CADM1;STAC;STAH3;EXT1;PLCXD3;GNAL;COL5A1;ITGBL1;SNAI2;LRP12;FBN1                         |
| POU2F1<br>human tf<br>ARCHS4<br>coexpressi<br>on  | 56/299 | 0.022025974<br>45180155 | GABRB3;DRAXIN;PSIP1;MYSM1;GLI2;ZNF608;ADAMTSL3;FLVCR1;JARID2;MAGI1;WDHD1;ADGRV1;LRRC49;ARID1B;SGO1;MSH6;MSH2;ROR1;CCDC150;FAM72B;ZNF397;TNKS;IREB2;GREB1L;GLB1L3;MIPOL1;PHF21B;FGD4;ATXN3;STOX2;GTF2IP1;RIC8B;KIAA1328;CLSPN;SRGAP3;ZNF423;BPTF;ZNF462;MYEF2;AUTS2;PTCH1;MGA;YLPM1;ARHGAP28;ARID3B;PBX1;GATAD2B;GULP1;MLLT10;CCDC88A;KANSL1;NEDD4;FAT3;KIAA1958;ASB3;TNRC6B               |
| IRX1 human<br>tf ARCHS4<br>coexpressi<br>on       | 56/299 | 0.022025974<br>45180155 | APP;DRAXIN;TENM2;TENM3;CTNND2;SIPA1L2;CDH4;ZNF608;DACH1;CDH2;DPYSL5;PEG10;TRIM2;KIF21A;ANKRD20A7P;EPHB2;TMEM178B;EBF2;RFX3;KAZN;FRMD4A;FAM219A;SORCS2;CFDP1;TNIK;CHST3;GRIA1;IGSF3;GREB1L;MLLT1;NPAS3;PHF21B;STOX2;GTF2IP1;GNG2;CDH20;PLXNA2;NCAM1;SRGAP3;ZNF423;MAP4K4;TMEM132C;NTRK2;NDFIP1;MYEF2;AUTS2;PTCH1;YLPM1;PXDNL;ESRRG;NETO2;DCLK1;PTPRD;SDK1;ZNF618;TTC3                      |
| LCORL                                             | 56/299 | 0.022025974             | SPAG16;CNTNAP2;ANKRD36;USP33;ELAVL4;NHSL1;PPI                                                                                                                                                                                                                                                                                                                                             |

|                                                   |        |                         |                                                                                                                                                                                                                                                                                                                                                                      |
|---------------------------------------------------|--------|-------------------------|----------------------------------------------------------------------------------------------------------------------------------------------------------------------------------------------------------------------------------------------------------------------------------------------------------------------------------------------------------------------|
| human tf<br>ARCHS4<br>coexpressi<br>on            |        | 45180155                | P5K2;LRRTM4;TRIM2;SNAPC3;SMARCA1;KIF21A;SOX6;ANKRD36C;WSB1;LRRC49;TCF12;MAGI2;RFX3;ZDHHC17;PYGO1;IFT81;NME7;LRRC7;ZNF678;ASTN2;XPR1;ANKRD36B;STXBP4;STAU2;ATL1;BTF3L4;NREP;NOL4;MTMR7;MIPOL1;MAPK8;GNG2;ATP9B;ATF7IP;MBD5;MYEF2;RANBP17;ST18;PTPRD;CCDC88A;LRFN5;FER;NBEA;APC;KLHL7;ASXL3;TTC3;PARGP1;CNTN4;ASB3                                                     |
| LCOR human<br>tf ARCHS4<br>coexpressi<br>on       | 56/299 | 0.022025974<br>45180155 | MYT1L;ANKRD36;GALNT18;CLCN3P1;ELAVL4;FRG1HP;C12ORF40;C16ORF72;NHSL1;LRRTM4;TRIM2;PDK1;ANKRD36C;WSB1;MAGI2;RFX3;PRKCA;OPRM1;ARID1B;ENAH;FRMD5;IFT81;LRRC7;BIRC6;ASTN2;ALG10B;XPR1;ANKRD36B;MCPH1;UBE2Q2P1;CUL5;KMT2C;BTF3L4;RGPDP6;TPTE2P2;RGPDP5;NREP;NOL4;MIPOL1;NKAIN2;PAK5;MBD5;MYEF2;INSR;MGA;PHC3;KITLG;DAB1;NBEA;KLHL7;TTC3;TCF4;ASB4;ASB3;XKR5;TNRC6B         |
| ESRRG<br>human tf<br>ARCHS4<br>coexpressi<br>on   | 56/299 | 0.022025974<br>45180155 | TENM2;PID1;TENM3;FRMPD4;ANKRD36;AP4E1;GRIK1;GRIK2;MYLK3;GRM5;ZNF608;DNER;KIF21A;NP1PA1;DIP2C;RNF111;MED1;PRMT8;ARHGEF12;LMNTD1;EML1;KIF6;ZDHHC14;PIAS2;KCTD8;MPPED2;CDH18;IGSF3;STAU2;RGPDP6;RGPDP4;PAK1;NKAIN3;FLRT2;PGBD5;SNTG1;ZMAT4;DNAJC21;NCAM1;CTNNA2;PAK3;ATP9A;MBD5;SYT1;PCDH9;NEGR1;CADM2;ST8SIA2;NTRK3;BTBD11;PTPRD;CCDC88A;NEDD4;TTC3;ZNF578;SCN2A       |
| EN2 human<br>tf ARCHS4<br>coexpressi<br>on        | 56/299 | 0.022025974<br>45180155 | BTG3;TENM3;TENM4;CTNND2;PTPRO;CELF4;ELAVL4;ZBTB20;KIF15;DACH1;CDH2;DPYSL5;PEG10;PSD3;EPHB2;ERC2;TMEM178B;GRID1;TCF12;KAZN;GFRA1;FRMD4A;SHISA6;IL1RAPL2;GRIA1;NTM;NF1P9;ILDR2;NREP;ABHD17C;NPAS3;STOX2;GTF2IP1;NKAIN3;SNTG1;CAMTA1;NCAM1;SRGAP3;ZNF423;ATP9A;NTRK2;MYEF2;AUTS2;PTCH1;PLCL1;NETO2;DCLK1;PBX1;PTPRD;LRFN2;SDK1;TTL5;FABP7;RNF182;ZNF536;FAT3            |
| NEUROG2<br>human tf<br>ARCHS4<br>coexpressi<br>on | 56/299 | 0.022025974<br>45180155 | APOOP5;ELAVL4;GLI3;ZNF608;SGCD;SH3PXD2A;AKT3;KIF13A;SOX6;EPHB2;PAMR1;NEO1;PRKG1;PRMT8;RBF0X2;TTC33;ANKRD20A11P;AFAP1;ZDHHC14;MPPED1;UBE2R2;HECW2;HECW1;RELL1;ROR2;TSHZ3;SEMA3A;CDCA8;OR9Q1;TMTC1;ZNF66;CARM1P1;GLIS1;IGSF21;GTF2IP1;ARSJ;ZNF106;STXBP6;SRGAP3;EVI5;PAK5;MAP4K4;ZNF462;ANKRD26;AUTS2;EYA4;ARHGAP28;FOXN3;PUM1;MCC;CPHL1P;ST18;CCDC88A;NFIA;CCNG2;TTC3 |
| CHD1 human<br>tf ARCHS4<br>coexpressi<br>on       | 56/299 | 0.022025974<br>45180155 | TCERG1;SETD2;DOCK8;SMG1P2;BACH1;LYST;MYSM1;SYNE2;KIF15;AKAP13;NIPBL;PTAR1;C16ORF72;HERC1;PPP6R3;LRRFIP1;JARID2;ZNF367;RBM33;ANKRD36C;AQR;MBNL1;USP7;ESCO1;ITGA4;VPS13C;VPS13B;HAUS6;BAZ1A;PARP8;PHF20L1;ASPM;BIRC6;UTRN;DOCK2;KDM7A;WDR26;ROCK1;KMT2C;RGPDP8;PCNX1;SCAF8;BTAF1;BPTF;ARFGEF1;USP24;SPEN;TRAPPC10;MGA;ERBIN;MED13L;KANSL1;DMXL2;SP3;PKN2;CDK12         |
| SALL1 human<br>tf ARCHS4<br>coexpressi<br>on      | 55/299 | 0.033403945<br>42430667 | GABRB3;TENM4;GLDC;CTNND2;PSIP1;LDLRAD3;SLC35F1;KIF15;PTPRG;GLI2;ROBO1;SPRED1;CDH2;NUF2;NEO1;SRGAP2B;MAGI1;WDHD1;SUPT16H;ADGRV1;SEMA6D;TCF12;HAUS6;NAV2;SGO1;ASPM;PHLPP1;ILDR2;STOX2;CECR2;GTF2IP4;LRIG1;ZNF423;SRGAP2;MPDZ;JAM2;WASF3;ZNF462;FARP1;NTRK2;MYEF2;AUTS2;PTCH1;HMG A2;ARID3B;PTPN13;CORO2B;GULP1;TJP1;PTPRD;FABP7;KIF4A;FAT3;TCF4;ADGRL2                 |
| ATF6 human<br>tf ARCHS4<br>coexpressi<br>on       | 55/299 | 0.033403945<br>42430667 | NRP1;DOCK5;PATJ;SETD2;IDE;SRGAP2C;GABRR2;VN1R7P;LONP2;PHACTR2;DIP2B;CAST;DST;VPS13C;FNDC3B;ADAM10;ARID5B;AP3B1;FNDC3A;ENAH;HEATR5A;EOGT;PIGK;BMP2K;RELL1;WDFY3;BIRC6;IFNAR1;WDR26;SAR1A;ROCK1;ARHGEF28;SEL1L;ANKRD19P;ASAP1;IQGAP1;SLC7A2;HECTD1;FCHO2;STARD13;CADM1;MYO10;NUBPL;MGA;DENND4C;ERBIN;LNPEP;DNAJC13;GNG12;CDC42BPA;PHC3;ELL2;ITCH;GSTA3;ATP13A3         |
| MXI1 human<br>tf ARCHS4                           | 55/299 | 0.033403945<br>42430667 | DOCK5;RNF11;CTNND2;DOCK8;RORA;FRY;LYST;YBX3;SYNE2;TRIM9;AKAP13;NIPBL;CA1;RASSF2;HERC1;ADGR                                                                                                                                                                                                                                                                           |

|                                                   |        |                         |                                                                                                                                                                                                                                                                                                                                                                                                                                             |
|---------------------------------------------------|--------|-------------------------|---------------------------------------------------------------------------------------------------------------------------------------------------------------------------------------------------------------------------------------------------------------------------------------------------------------------------------------------------------------------------------------------------------------------------------------------|
| coexpressi<br>on                                  |        |                         | <i>E3; UIMC1; SOX6; JAK2; RBM33; MBNL1; ARHGEF12; TANGO2; VPS13C; ARAP2; KAZN; VPS13B; PARP8; TRIM58; WDFY3; UTRN; MCTP2; KDM7A; HEMGN; WDR26; PHLPP1; RAP1GAP; KIAA0513; MAN2A2; HECTD4; ZSWIM6; ASCC2; JAZF1; SPECC1; NDFIP1; SIAH2; SUSU1; ERBIN; XPO7; LNPEP; ARHGA P26; TTL7; UBE20; CPEB4; BCL2L1</i>                                                                                                                                 |
| JAZF1<br>human tf<br>ARCHS4<br>coexpressi<br>on   | 55/299 | 0.033403945<br>42430667 | <i>RNF11; CTNND2; CELF4; FRY; LYST; HS6ST3; SYNPR; SCGN; GLT1D1; CA1; RASSF2; ADGRE3; TANGO2; TMOD2; IPCEF1; SYN2; ZDHHC17; PGM2L1; IL17RA; PIGK; TRIM58; VSTM2A; KDM7A; HEMGN; MTMR3; WDR26; RTN1; STXBP1; ATL1; PRDM11; NALCN; KIAA0513; GNG2; MXI1; ASCC2; CTNNA2; PAK3; OPCML; LYN; PTPRN2; NDFIP1; SYT1; SIAH3; IQSEC1; SYT16; FAM135B; SYNJ1; APC; RCAN2; TRPV5; CNTN1; CPE; SCN2A; SSBP2; CPEB4</i>                                  |
| SOX1 human<br>tf ARCHS4<br>coexpressi<br>on       | 55/299 | 0.033403945<br>42430667 | <i>DRAXIN; TENM3; CTNND2; PSIP1; GLI3; GLI2; ROBO1; CDH4; ZNF608; DACH1; CDH2; DPYSL5; PEG10; TRIM2; KIF21A; ZNF521; MAGI1; WSB1; TMEM178B; RFX3; FRMD4A; CFDP1; IFT81; MPPED2; GRIA1; CRB1; SHC3; NRXN3; ILDR2; NREP; NPAS3; PHF21B; STOX2; RIC8B; GNG2; CDH20; SRGAP3; ZNF423; NTRK2; MYEF2; AUTS2; ST8SIA2; NETO2; DCLK1; PTPRD; MAPK10; SDK1; LYRM4; ZNF618; FABP7; SMOC1; TTC3; TCF4; RGS12; APBA2</i>                                 |
| ZFP37<br>human tf<br>ARCHS4<br>coexpressi<br>on   | 55/299 | 0.033403945<br>42430667 | <i>MYT1L; PTPRO; ELAVL4; CDH8; NHL1; GRM7; DPYSL5; LRR TM4; AKT3; TMEM108; PHACTR3; KIF21A; ERC1; DIP2C; RA LGPS1; WSB1; RBFOX2; LRRC49; MAGI3; HUNK; ZDHHC17; P GM2L1; LRRC7; KCNQ3; AMPH; XPR1; ANKRD36B; GRIA1; KH DRBS2; NLGN1; RTN1; ATL1; RASAL2; NREP; UBR1; NYAP2; NOL4; FGD4; GNG2; SNTG1; CTNNA2; PAK3; MPDZ; PAK5; GA BRA2; MAPK10; CCDC88A; ASAH2B; APC; PPP2R2B; KLHL7; ASXL3; TTC3; TCF4; SSBP2</i>                           |
| SALL3<br>human tf<br>ARCHS4<br>coexpressi<br>on   | 55/299 | 0.033403945<br>42430667 | <i>GABRB3; GRIK3; PSIP1; LDLRAD3; SLC35F1; KIF15; GLI2; ZNF608; NHL1; CDH2; NUF2; JARID2; ZNF521; SRGAP2B; MAGI1; WDHD1; SUPT16H; ADGRV1; SEMA6D; TCF12; NAV2; SEZ6L; SGO1; ASPM; MSH2; CNKSR3; BLM; PHLPP1; LUZP2; ILDR2; NPAS3; STOX2; CECR2; UGP2; ZNF704; CLSPN; CS MD2; ZNF423; JAM2; BPTF; BARD1; RFTN2; ZNF462; NTRK2; MYEF2; AUTS2; CCDC138; PTCH1; WNT7A; CORO2B; NDC80; GULP1; FABP7; AGO2; FAT3</i>                              |
| ZBTB20<br>human tf<br>ARCHS4<br>coexpressi<br>on  | 55/299 | 0.033403945<br>42430667 | <i>CCDC122; PATJ; MYT1L; CELF4; KLHL33; MYLK3; UNC80; R PS6KA5; CA5A; ADAMTSL3; SLC16A7; ERC2; USP8; ANKRD3 6C; MAGI2; ABCC9; SORCS3; SHISA9; ARID1B; NAALADL2; PIAS2; MYO3B; PEAK1; CNKSR3; WDPCP; ASTN2; PPARA; AN KRD36B; LINC00643; SDCCAG8; ZNF397; NMD3; LPP; MIPO L1; DPP6; PCNX2; KIAA1328; FLRT2; ZNF704; PAK3; MBD5; KCNJ6; CADM1; NEGR1; HOMER2; NUBPL; KCNJ15; BTBD9; PHC3; NEDD4; RGS12; CEACAM22P; ASB3; C8ORF34; TNRC6 B</i> |
| SMARCA1<br>human tf<br>ARCHS4<br>coexpressi<br>on | 55/299 | 0.033403945<br>42430667 | <i>PCSK2; TENM3; ABCD3; C2CD2; TUSC3; PTPRK; LDB2; PTPR G; ROBO1; IGF1R; ARHGAP42; CDH2; PEG10; TEAD1; ADAMT S9; MAGI1; RBFOX2; COL27A1; CSNK2A1; FNDC3B; F5; ENA H; FREM1; DOCK1; CHST3; RAI14; YAP1; GRAMD1B; ACSS3; SDC2; SEMA3A; FSTL1; EHBP1; RELN; UGP2; TTR; GPC6; MP DZ; MAP4K4; FARP1; MYEF2; RDX; HMGA2; LAMB1; PTPN13; CDC42BPA; PTK2; PLEKHA8; TJP1; SDK1; DLG5; FAT1; CPE ; EIF4G3; ADGRL2</i>                                 |
| EEA1 human<br>tf ARCHS4<br>coexpressi<br>on       | 55/299 | 0.033403945<br>42430667 | <i>CHD9; RORA; GXYLT2; GLI3; PCMTD2; SRGAP2C; CCDC91; N HSL1; PPIP5K2; ZNF208; PPP6R3; PHACTR2; TLK1; ERC1; METTL15; PCMTD1; HSDL2; MBNL2; DST; VPS13C; ADAM10; ENAH; MMP16; KIF16B; WDFY3; BIRC6; DGKI; DDR2; MCPH1; RABGAP1; SAR1A; CTNBP2; KMT2C; RASAL2; ERBB4; EVI 5; SEC23B; ARSB; PAK5; BPTF; OSBPL6; SIAH3; INSR; MGA ; RDX; DENND4C; SAMD4A; GNG12; TJP1; OCLN; ITCH; NBEA ; SPIRE1; CNIH3; ZNF354C</i>                            |
| CHD6 human<br>tf ARCHS4                           | 55/299 | 0.033403945<br>42430667 | <i>RERE; DIDO1; PATJ; TRIO; SIPA1L3; SYNE2; IGF1R; HERC 2; ZNF608; C16ORF72; HERC1; MPRIP; FBXO3; GTF2I; ARH</i>                                                                                                                                                                                                                                                                                                                            |

|                                             |        |                         |                                                                                                                                                                                                                                                                                                                                                   |
|---------------------------------------------|--------|-------------------------|---------------------------------------------------------------------------------------------------------------------------------------------------------------------------------------------------------------------------------------------------------------------------------------------------------------------------------------------------|
| coexpressi<br>on                            |        |                         | GEF12;VPS13C;VPS13B;ARID1B;NAALADL2;INIP;KIAA1217;PEAK1;WDFY3;BIRC6;ARHGEF7;UTRN;MACF1;NFA T5;CCDC186;KMT2C;DNAH5;KALRN;LARP1;KIAA1328;HECTD1;ZNF704;HECTD4;STK38;GSE1;FLNB;BPTF;SPEN;ZNF462;CREBBP;GLYATL2;LRBA;PTCH1;MGA;YLPM1;MED13L;TJP1;ARHGAP32;PDP2;KANS1;CDK12                                                                            |
| FBN1 human<br>tf ARCHS4<br>coexpressi<br>on | 55/299 | 0.033403945<br>42430667 | NRP1;TRIO;COL14A1;PTPRM;ANTXR1;PRSS23;GALNT10;ADAMTSL1;TUBB6;SGCD;SH3PXD2A;RPS6KA2;SVEP1;TEAD1;PAMR1;POSTN;IL1R1;FNDC3B;AFAP1;FRMD6;EVC;COL4A2;CDH13;MXRA7;ALPK2;DOCK1;VCL;DDR2;RAI14;YAP1;NOTCH2;CEMIP;SEMA3C;TWIST2;NTN4;ATP10A;LTBP1;GLIS1;CTIF;ARSJ;ABL1;FAM180A;SLIT3;CHSY3;NEK7;CRIM1;CYBRD1;LAMB1;GNG12;EXT1;COL5A1;DLC1;FAT1;ITGBL1;SNAI2 |

**Table S9.** The results of RNA-Seq data in initial and differentiating K562 cells. baseMean—mean of counts divided by the size factors for the counts for both conditions. log2FoldChange—the log2 value of the fold change. lfcSE presents the standard error of the log2FoldChange. Stat is the Wald statistic: the log2 fold change divided by lfcSE, which is compared to a standard normal distribution to generate a two-tailed *p*-value. padj—adjusted *p*-values. Excel file attached separately. Related to Figure 3A.

**Table S10.** Venn diagram showing the intersections of upregulated genes (*p*-value < 0.05) with lists of genes that reveal an increase or decrease in rDNA contacts. Related to Figure 3B.

| Names                                 | total | elements                                                                                                                                                                                                                                                                                                                                                                                                                                                                                                                                                                                                                                                                                                                                                                                                                                                                                                                                                                                                                                                                                       |
|---------------------------------------|-------|------------------------------------------------------------------------------------------------------------------------------------------------------------------------------------------------------------------------------------------------------------------------------------------------------------------------------------------------------------------------------------------------------------------------------------------------------------------------------------------------------------------------------------------------------------------------------------------------------------------------------------------------------------------------------------------------------------------------------------------------------------------------------------------------------------------------------------------------------------------------------------------------------------------------------------------------------------------------------------------------------------------------------------------------------------------------------------------------|
| 4C-increased-1309<br>upregulated-1285 | 74    | THRAP3 FOXK2 TAF2A USP14 LIMD1 DIDO1 WDR12 PHACTR1 OPA3 UIMC1 GUSBP1 TLK1 CREBBP FAM193A MIR17HG SUPT16H NIPA2 LRRFIP1 CTDP1 HECTD1 BIRC6 PHACTR2 DNAJC21 INTS13 DDX10 CLSPN PPP6R3 GUCD1 PPIP5K2 EBNA1BP2 SNX8 NSMAF GSE1 ABLIM1 UCK2 RPTOR STT3A ECHDC1 ACACA MAN2A2 CDK12 AFG3L2 CCDC138 MTOR LARP1 PSMB2 ANKRD11 SPEN NAP1L4 KANS1 CRIM1 MTREX GID8 LINC00861 CUL1 NSUN2 LINC01128 GRB10 MLLT1 SDCBP MBNL1 ABI1 MED1 HNRNPM MACROH2A1 JPT2 MSH2 BAZ1A EWSR1 ELL2 PRAME NUP43 EOGT ANP32B                                                                                                                                                                                                                                                                                                                                                                                                                                                                                                                                                                                                   |
| 4C-decreased-1200<br>upregulated-1285 | 78    | IGF2BP3 MRPL45 HERC2 ARMC6 ASH1L GOT2 BRD4 CHAF1A CHAMP1 NSD1 AGO2 KIAA0753 ANKRD17 IBA57 SREBF2 RESF1 MAPK11P1L ZC3H14 ZNF33B BRCA2 SSBP3 LCLAT1 MS4A4A SMARCA4 CWC22 ZNF121 DHX29 TM9SF3 CFAP97 ANKRD33B UBAP2 APC GEMIN5 KTN1 HMGB1 MEF2C SETD2 MRPS35 UTP4 SMARCC1 NUP214 ECPAS SFPQ URB1 STAG2 PAFAH1B1 CSE1 ZBTB2 EFTUD2 NRIP1 STON2 DNAJC7 ZC3HAV1 CPSF3 SNRPD1 SUMO3 BZW1 PCNA AQR RNF138 ZCCHC14 ADSS2 LINC00923 MGA NIN PPIL2 SPTB UBAP2L ZFYVE26 BACH1 OXNAD1 ZNF431 TBCD KCNK5 SERBP1 RANBP2 PEPD PCNT                                                                                                                                                                                                                                                                                                                                                                                                                                                                                                                                                                             |
| 4C-increased-1309                     | 1233  | FSTL1 CD44 PLCE1 SLMAP FAM219A FARP1 KCNMA1 PKNOX2 ARHGAP5-AS1 APBB2 ZNF684 KLHL13 GLT1D1 ABCB7 COX7A2L FYB2 RNF38 AHDC1 LINC02073 CUBN SLC10A7 LDB3 PAK1 SCAF8 SLC6A11 B9D1 CPXM2 RTN1 KIRREL1 LINC01467 PEBP4 PPP1R13B FGR TOP3A EPN2 LINC01491 LINC02664 INIP NSMCE2 TTC37 ZNF208 RCL1 PRSS51 SLC25A52 OAZ2 TEAD1 ZNF718 DKK2 GLRA4 OR7A17 DHRS11 PCAT19 CCDC34 TAOX3 DNAJC27-AS1 PUM3 ZNF66 LINC02563 SCYGR8 LRGUK TENM4 TRPM6 FAAHP1 LINC01479 CCDC106 SLC8A1 SMIM35 ANLN ARHGEF26-AS1 SLC1A7 LGI2 ANKRD6 KCNC1 ADGRE3 GPR55 DNAJC15 STAU2 PGAP4 SIAH3 RIPK4 TMEM63C ZNF257 TIAL1 ST8SIA4 HYDIN2 ADGRE4P IGLV3-2 USP7 CD82 KIR2DL4 FAM167B ARL13B SCP2 TMEM156 ABHD2 ALCAM DENND1A SEC14L1 ERLIN2 ATP11C PDZRN3 SF3B6 ADAM32 RSRC1 DNAH11 ASS1 ZSCAN5C NIPBL CEP120 B3GALT5 CDC42EP3 MICU1 FAM204A SNX25 MYO5C SDC2 OTX2-AS1 ATF1 SLC25A21 SLC22A14 SAMD12-AS1 RBPJP6 IL6R C12orf4 TTLL1 LINC01579 NEBL RARB CCDC18 CDH8 AGPS TRPV5 HEPHL1 PJA2 KLHL7 TCF4 ECMIP1 GACAT3 RPRD1B AURKA LINC01145 PTPN2 AP3B1 PBLD GORAB ERICH5 BCAP29 TTC21B PSMF1 SLC5A4-AS1 SH3PXD2A NEK6 SLC39A12 MOB1B |

|  |                                                                                                                                                                                                                                                                                                                                                                                                                                                                                                                                                                                                                                                                                                                                                                                                                                                                                                                                                                                                                                                                                                                                                                                                                                                                                                                                                                                                                                                                                                                                                                                                                                                                                                                                                                                                                                                                                                                                                                                                                                                                                                                                                                                                                                                                                                                                                                                                                                                                                                                                                                                                                                                                                                                                                                                                                                                                                                                                                                                                                                                                                                                                                                                                                                                                                                                                                                                                                                                                                                                                                                                                                                                                                                                                                                                                                                                                                                                                                                                                                                                                                                                                                                                                                                                                                                                                                                                                                                                                                                                                                                                                                                                                                                                                                                                                                                                                                                                                                                                                                                                                                                                                                                                                                                                                                                                                                                                                                                                                                                                                                                                                                                                                                                                                                                                                                                                                                                                                                                                                                                                                                                                                                                                                                                                                                                                                                                                                                                                                                                                                                                                                                                                                                                                                                                                                                                                                                                                                                                                                                                                                                                                                                                                                                                                                                                                                                                                                                                                                                                                                                                                                                                                                                                                                                                                                                                                                                                                                                                                                                                                                                                                                                                                                                                                                                                                                                                                                                                                                                                                                                                                                                                                                                                                                                                                                                                                                                                                                                                                                                                                                                                                                                                                                                                                                                                                                                                                                                                                                                                                                                                                                                                                                                                                 |
|--|-----------------------------------------------------------------------------------------------------------------------------------------------------------------------------------------------------------------------------------------------------------------------------------------------------------------------------------------------------------------------------------------------------------------------------------------------------------------------------------------------------------------------------------------------------------------------------------------------------------------------------------------------------------------------------------------------------------------------------------------------------------------------------------------------------------------------------------------------------------------------------------------------------------------------------------------------------------------------------------------------------------------------------------------------------------------------------------------------------------------------------------------------------------------------------------------------------------------------------------------------------------------------------------------------------------------------------------------------------------------------------------------------------------------------------------------------------------------------------------------------------------------------------------------------------------------------------------------------------------------------------------------------------------------------------------------------------------------------------------------------------------------------------------------------------------------------------------------------------------------------------------------------------------------------------------------------------------------------------------------------------------------------------------------------------------------------------------------------------------------------------------------------------------------------------------------------------------------------------------------------------------------------------------------------------------------------------------------------------------------------------------------------------------------------------------------------------------------------------------------------------------------------------------------------------------------------------------------------------------------------------------------------------------------------------------------------------------------------------------------------------------------------------------------------------------------------------------------------------------------------------------------------------------------------------------------------------------------------------------------------------------------------------------------------------------------------------------------------------------------------------------------------------------------------------------------------------------------------------------------------------------------------------------------------------------------------------------------------------------------------------------------------------------------------------------------------------------------------------------------------------------------------------------------------------------------------------------------------------------------------------------------------------------------------------------------------------------------------------------------------------------------------------------------------------------------------------------------------------------------------------------------------------------------------------------------------------------------------------------------------------------------------------------------------------------------------------------------------------------------------------------------------------------------------------------------------------------------------------------------------------------------------------------------------------------------------------------------------------------------------------------------------------------------------------------------------------------------------------------------------------------------------------------------------------------------------------------------------------------------------------------------------------------------------------------------------------------------------------------------------------------------------------------------------------------------------------------------------------------------------------------------------------------------------------------------------------------------------------------------------------------------------------------------------------------------------------------------------------------------------------------------------------------------------------------------------------------------------------------------------------------------------------------------------------------------------------------------------------------------------------------------------------------------------------------------------------------------------------------------------------------------------------------------------------------------------------------------------------------------------------------------------------------------------------------------------------------------------------------------------------------------------------------------------------------------------------------------------------------------------------------------------------------------------------------------------------------------------------------------------------------------------------------------------------------------------------------------------------------------------------------------------------------------------------------------------------------------------------------------------------------------------------------------------------------------------------------------------------------------------------------------------------------------------------------------------------------------------------------------------------------------------------------------------------------------------------------------------------------------------------------------------------------------------------------------------------------------------------------------------------------------------------------------------------------------------------------------------------------------------------------------------------------------------------------------------------------------------------------------------------------------------------------------------------------------------------------------------------------------------------------------------------------------------------------------------------------------------------------------------------------------------------------------------------------------------------------------------------------------------------------------------------------------------------------------------------------------------------------------------------------------------------------------------------------------------------------------------------------------------------------------------------------------------------------------------------------------------------------------------------------------------------------------------------------------------------------------------------------------------------------------------------------------------------------------------------------------------------------------------------------------------------------------------------------------------------------------------------------------------------------------------------------------------------------------------------------------------------------------------------------------------------------------------------------------------------------------------------------------------------------------------------------------------------------------------------------------------------------------------------------------------------------------------------------------------------------------------------------------------------------------------------------------------------------------------------------------------------------------------------------------------------------------------------------------------------------------------------------------------------------------------------------------------------------------------------------------------------------------------------------------------------------------------------------------------------------------------------------------------------------------------------------------------------------------------------------------------------------------------------------------------------------------------------------------------------------------------------------------------------------------------------------------------------------------------------------------------------------------------------------------------------------------------------------------------------------------------------------------------------------------------------------------------------------------------------------------|
|  | <p> <i>OR13C9</i> <i>ASAP2</i> <i>SEMA3F-AS1</i> <i>YIPF6</i> <i>TMEM25</i> <i>OSBPL10</i> <i>RIC3</i> <i>CASP5</i> <i>EXOC1</i> <i>RNF182</i><br/> <i>RALGPS1</i> <i>UPP2</i> <i>PHF21B</i> <i>ZFPM2</i> <i>PIEZO2</i> <i>FAM66A</i> <i>BCRP2</i> <i>SVEP1</i> <i>FANCA</i> <i>DEUP1</i> <i>ZNF354C</i><br/> <i>LINC02325</i> <i>LRRC2</i> <i>ANKRD26</i> <i>RGS20</i> <i>MIR3118-2</i> <i>PDGFD</i> <i>CNDP2</i> <i>HCRT1</i> <i>RELI1</i><br/> <i>LINC02176</i> <i>BRINP3</i> <i>LINC01237</i> <i>KIF4A</i> <i>XRCC4</i> <i>OVCH2</i> <i>COP1P1</i> <i>EPHA7</i> <i>MAP7</i> <i>TM9SF4</i><br/> <i>SENP8</i> <i>SUSD6</i> <i>NSG2</i> <i>ZBTB80S</i> <i>GRIA1</i> <i>ZNF627</i> <i>IFNAR1</i> <i>KIAA0319L</i> <i>USH2A</i> <i>LHFPL6</i> <i>OPN3</i><br/> <i>NEGR1</i> <i>NAV2</i> <i>XXYLT1</i> <i>CACNG2</i> <i>ANO10</i> <i>BTBD9</i> <i>SPATA48</i> <i>CA5A</i> <i>FAM72D</i> <i>USP18</i> <i>NET1</i><br/> <i>TTC28-AS1</i> <i>BMP2</i> <i>TOX</i> <i>KIAA0232</i> <i>LINC02011</i> <i>SRGAP2C</i> <i>TMOD2</i> <i>SLC44A5</i> <i>FAM107B</i> <i>LUZP2</i><br/> <i>BTBD10</i> <i>SH2D3C</i> <i>MELK</i> <i>RBPJP2</i> <i>LRIG1</i> <i>YPEL1</i> <i>PRKACB</i> <i>ZNF536</i> <i>RIMS1</i> <i>GXYLT2</i> <i>HIPK3</i><br/> <i>EPB41L3</i> <i>WSB1</i> <i>TMEM225</i> <i>POR</i> <i>LINC00896</i> <i>PARVB</i> <i>MORC1</i> <i>OR10H2</i> <i>ZBTB7C</i> <i>SCGB1D5P</i><br/> <i>KANK4</i> <i>GAST</i> <i>SGO1</i> <i>WDR26</i> <i>SARIA</i> <i>SLC37A1</i> <i>BCL11B</i> <i>LINC01814</i> <i>DTWD2</i> <i>LINC01213</i><br/> <i>NELL2</i> <i>TSPAN2</i> <i>MAGI1</i> <i>SLC14A2</i> <i>LINC02668</i> <i>OR52B3P</i> <i>ASAH2B</i> <i>RALB</i> <i>MOSMO</i> <i>KRTAP19-10P</i><br/> <i>BLK</i> <i>PPP1R17</i> <i>PIAS1</i> <i>PTCSC3</i> <i>LINC02180</i> <i>SSBP2</i> <i>ZNF705CP</i> <i>GALNT10</i> <i>FHIP2A</i> <i>CFAP74</i><br/> <i>ZNF846</i> <i>HAGLR</i> <i>ZNF287</i> <i>ARMC2</i> <i>FER1L6</i> <i>ALS2</i> <i>CYTH4</i> <i>COMMD8</i> <i>ZNF608</i> <i>PTGER4P2</i><br/> <i>TBATA</i> <i>ATL1</i> <i>SERPINB11</i> <i>ZDHC17</i> <i>KCNH1</i> <i>ABCC9</i> <i>SNAP29</i> <i>QSOX2</i> <i>SGSIL</i> <i>MCF2L</i><br/> <i>LINC01098</i> <i>ACSS3</i> <i>BBOX1-AS1</i> <i>ABCD3</i> <i>DCDC1</i> <i>NPAS2</i> <i>DIAPH3</i> <i>CCSER2</i> <i>INTS7</i> <i>AMPH</i> <i>ASB4</i><br/> <i>TMEM178B</i> <i>COL5A3</i> <i>COL4A2</i> <i>PARP15</i> <i>ME2</i> <i>GRAMD1B</i> <i>SIAH2</i> <i>POLR3A</i> <i>ZNF44</i> <i>LINC00536</i><br/> <i>HEATR5A</i> <i>ADA2</i> <i>PRKCZ</i> <i>BPNT1</i> <i>F13A1</i> <i>ALG10B</i> <i>CDC14B</i> <i>GIPC2</i> <i>RNU6-1007P</i> <i>KDM7A</i><br/> <i>CYP4F22</i> <i>ABCA10</i> <i>LINC01182</i> <i>KLHL1</i> <i>SP110</i> <i>LINC01566</i> <i>PRSS2</i> <i>MRM1</i> <i>ZNF705D</i> <i>ATP9A</i><br/> <i>POSTN</i> <i>OLFM4</i> <i>SAMHD1</i> <i>OCLN</i> <i>AK8</i> <i>SDF4</i> <i>ITGBL1</i> <i>TNFSF11</i> <i>SPOP</i> <i>EFHD2</i> <i>EGFR</i> <i>MYEOV</i><br/> <i>ADAM28</i> <i>MRPL13</i> <i>B4GALNT3</i> <i>AFAP1</i> <i>DPY19L2P1</i> <i>SH3BP5</i> <i>SLC49A4</i> <i>FANCM</i> <i>NEO1</i> <i>MELTF</i><br/> <i>MXRA7</i> <i>MYT1L</i> <i>SRGAP2B</i> <i>SLC37A2</i> <i>ATPIA1-AS1</i> <i>SORCS3</i> <i>PDP2</i> <i>VPS37A</i> <i>LRRC49</i> <i>ERP27</i><br/> <i>ZNRF3</i> <i>ZBTB21</i> <i>BBS4</i> <i>TENM3</i> <i>ITPKB</i> <i>ENPEP</i> <i>TUSC3</i> <i>IPCEF1</i> <i>RTRAF</i> <i>NF1P9</i> <i>OR4K6P</i> <i>BIN2</i><br/> <i>LINC00877</i> <i>TCERG1</i> <i>UBE2O</i> <i>VENTX</i> <i>DIRC3</i> <i>PLCZ1</i> <i>CPEB4</i> <i>COL6A5</i> <i>ZFYVE28</i> <i>NCOR1</i><br/> <i>LINC02213</i> <i>PRDM10</i> <i>EBF2</i> <i>C16orf72</i> <i>USP33</i> <i>ERBIN</i> <i>RNY4</i> <i>SLC24A4</i> <i>ZNF573</i> <i>MBTPS2</i><br/> <i>KHDC4</i> <i>C2</i> <i>NTF3</i> <i>OR6C75</i> <i>ZNF705G</i> <i>LINC01684</i> <i>PI4K2B</i> <i>USP41</i> <i>RBMX2</i> <i>FAM72A</i> <i>IL17RA</i><br/> <i>SOX1-OT</i> <i>SUSD4</i> <i>PTH</i> <i>GALNT14</i> <i>RAB22A</i> <i>H2ACP1</i> <i>FAM66C</i> <i>ZNF160</i> <i>LINC00466</i> <i>HADHB</i><br/> <i>NSMCE1</i> <i>DNAH10</i> <i>GAS2</i> <i>PDE10A</i> <i>CACNB2</i> <i>REPS1</i> <i>MAP3K4</i> <i>TP53I11</i> <i>PDXDC1</i> <i>MTPN</i><br/> <i>MT1HL1</i> <i>LINC02646</i> <i>GNG7</i> <i>VSTM2A</i> <i>RUNX2</i> <i>ZNF804B</i> <i>LRP12</i> <i>LRRC8B</i> <i>CSNK1G1</i> <i>ZNF169</i><br/> <i>MICU2</i> <i>SOX6</i> <i>JAZF1-AS1</i> <i>SGCD</i> <i>RC3H2</i> <i>LINC01492</i> <i>RNU6-374P</i> <i>TNNI1</i> <i>RAC1P3</i> <i>SP3</i> <i>STK32B</i><br/> <i>PLG</i> <i>ZNF106</i> <i>LINC01020</i> <i>NR2C1</i> <i>SLFN11</i> <i>ADAMTS3</i> <i>ERO1B</i> <i>DNAH8</i> <i>NHS</i> <i>LINC02505</i> <i>CABYR</i><br/> <i>LINC01476</i> <i>ANK3-DT</i> <i>RGS12</i> <i>RAPGEF2</i> <i>ZNF438</i> <i>GTF21</i> <i>NCK1</i> <i>SOHLH1</i> <i>LINC01192</i> <i>CDV3P1</i><br/> <i>C15orf32</i> <i>PUDP</i> <i>KDM1B</i> <i>SSPN</i> <i>HS3ST2</i> <i>F5</i> <i>PATJ</i> <i>FAT1</i> <i>NUP50-DT</i> <i>CPS1</i> <i>MESD</i> <i>PRKCH</i><br/> <i>TRAK1</i> <i>TET1</i> <i>FAM66B</i> <i>RHPN2</i> <i>ANKRD30A</i> <i>RABGAP1L</i> <i>KRT25</i> <i>NMU</i> <i>DENND2B</i> <i>LINC00603</i><br/> <i>HADHA</i> <i>CFDP1</i> <i>LINC00944</i> <i>SMARCA1</i> <i>MIR3118-3</i> <i>FNDC3B</i> <i>ADAMTS9-AS2</i> <i>ASTN1</i><br/> <i>GNG12-AS1</i> <i>GFRA1</i> <i>NSG1</i> <i>RMST</i> <i>ANKRD20A8P</i> <i>MAPKBP1</i> <i>CPE</i> <i>TDRD7</i> <i>RNF8</i> <i>LY86-AS1</i><br/> <i>LINC02613</i> <i>PYGO1</i> <i>LINC01723</i> <i>NFKBIA</i> <i>TEX29</i> <i>DNAL1</i> <i>TRAPPC3</i> <i>CD101</i> <i>PFKFB4</i><br/> <i>TMEM132D</i> <i>HMCN2</i> <i>FHIP1A</i> <i>EFCAB8</i> <i>LINC01204</i> <i>SPRED2</i> <i>SCN10A</i> <i>HSDL2</i> <i>MYLK3</i> <i>NCOA7</i><br/> <i>ANKRD18A</i> <i>ZNF350-AS1</i> <i>CEP128</i> <i>ZC3H15</i> <i>LINC01135</i> <i>ANKRD7</i> <i>ABCA5</i> <i>PTCSC2</i> <i>CIB4</i><br/> <i>ABCC8</i> <i>TLL5</i> <i>AKAP11</i> <i>NOXRED1</i> <i>TMTC1</i> <i>TTC33</i> <i>MOCS2</i> <i>NRK</i> <i>NAT1</i> <i>KICS2</i> <i>CYBRD1</i><br/> <i>MCPH1</i> <i>MINARI</i> <i>EIPR1</i> <i>STON1-GTF2A1L</i> <i>BMP2K</i> <i>LINC02543</i> <i>CYFIP2</i> <i>APOOP5</i> <i>CCDC126</i><br/> <i>BABAM2</i> <i>MSANTD4</i> <i>CRB1</i> <i>IL1R1</i> <i>OTOG</i> <i>HEPACAM</i> <i>USP8</i> <i>NUDT21</i> <i>XPO7</i> <i>ARSJ</i> <i>KCNS3</i><br/> <i>ENPP3</i> <i>ZNF235</i> <i>ERC1</i> <i>LINC02006</i> <i>VWA3B</i> <i>ZNF850</i> <i>ALPL</i> <i>PDLIM5</i> <i>MAP3K9</i> <i>XYLT1</i> <i>BTA1</i><br/> <i>PDCD61PP2</i> <i>ALPK2</i> <i>LINC02660</i> <i>ABCA13</i> <i>HNRNP9P</i> <i>RFX2</i> <i>MAPK8IP1</i> <i>ADGRB1</i> <i>SLC66A1L</i><br/> <i>LYPLAL1-DT</i> <i>ADGRE1</i> <i>RAP1GDS1</i> <i>FOXO1B</i> <i>TET1P1</i> <i>ST8SIA5</i> <i>TBC1D19</i> <i>ZNRF2P2</i> <i>PDE6A</i><br/> <i>CHST8</i> <i>BID</i> <i>COX5A</i> <i>MACF1</i> <i>MDFIC</i> <i>MNAT1</i> <i>PCMTD2</i> <i>MBNL2</i> <i>DNAH14</i> <i>STARD4-AS1</i> <i>ERII</i><br/> <i>TC2N</i> <i>TUBGCP3</i> <i>BTLA</i> <i>LGALS9DP</i> <i>SLC15A5</i> <i>HCP5</i> <i>AMBRA1</i> <i>CLEC20A</i> <i>NETO2</i> <i>DOCK2</i><br/> <i>SERPINA6</i> <i>ASCL3</i> <i>PTPRE</i> <i>IFT46</i> <i>FAM66D</i> <i>NUP210L</i> <i>LINC02063</i> <i>TSPAN3</i> <i>ALPK3</i> <i>LINC02465</i><br/> <i>FLVCR1</i> <i>SLC9A5</i> <i>MUSK</i> <i>EPDR1</i> <i>MYO3B</i> <i>LMNTD1</i> <i>RAB8B</i> <i>LINC00583</i> <i>MYOM1</i> <i>ZSCAN30</i><br/> <i>MTCO2P3</i> <i>LINC00469</i> <i>RNU6-835P</i> <i>RXRA</i> <i>CGAS</i> <i>ARHGEF7</i> <i>SLC23A2</i> <i>LIN54</i> <i>LINC01649</i><br/> <i>ARPP21</i> <i>ARL11</i> <i>MAML2</i> <i>SPAG16</i> <i>ADAM5</i> <i>TRIM43B</i> <i>ZNF879</i> <i>ARHGEF12</i> <i>LYPLA1</i> <i>LNPEP</i><br/> <i>DDX39BP1</i> <i>LINC02198</i> <i>UNC93B3</i> <i>RPS3AP6</i> <i>POU1F1</i> <i>ZNF397</i> <i>KIAA1958</i> <i>CARD18</i><br/> <i>LINC00623</i> <i>NEDD4</i> <i>RFTN1</i> <i>CCDC141</i> <i>NEK4</i> <i>RSU1P1</i> <i>PEX14</i> <i>CFAP61</i> <i>FYCO1</i> <i>LPGAT1</i><br/> <i>CNTN4</i> <i>FOLH1</i> <i>HRH4</i> <i>SPRR2D</i> <i>LRRC38</i> <i>EXOC6B</i> <i>EVC2</i> <i>CNKS3</i> <i>USP49</i> <i>DRAXIN</i> <i>SEMA3E</i><br/> <i>CSF1</i> <i>CEACAM22P</i> <i>LINC02109</i> <i>LINC00511</i> <i>SLC8A3</i> <i>TRNAU1AP</i> <i>LINC02145</i> <i>RNF17</i> <i>HAS2-AS1</i><br/> <i>KIF11</i> <i>LINC02400</i> <i>SLC2A3</i> <i>FAM72B</i> <i>PRAMEF26</i> <i>SLC40A1</i> <i>PHC3</i> <i>STOML1</i> <i>CADM2</i><br/> <i>SDR42E1</i> <i>LINC01581</i> <i>FANCL</i> <i>SH3GLB1</i> <i>GABRR2</i> <i>RAP1GAP</i> <i>PIK3C3</i> <i>OTULINL</i> <i>RAD9A</i><br/> <i>SLC9C1</i> <i>SCML2</i> <i>SPOPL</i> <i>MAGI3</i> <i>LINC00701</i> <i>TRAF3</i> <i>MPPED1</i> <i>CCDC122</i> <i>CHD6</i> <i>FAM135B</i><br/> <i>TMEM273</i> <i>MORN1</i> <i>CCDC186</i> <i>CFH</i> <i>PAXIP1-AS2</i> <i>LINC01695</i> <i>PTPRB</i> <i>INTS8</i> <i>LINC01412</i><br/> <i>ITGA1</i> <i>VNIR7P</i> <i>MARCHF6</i> <i>CCNG2</i> <i>ATG4B</i> <i>CIBAR1</i> <i>ODR4</i> <i>GAGE13</i> <i>TANC1</i> <i>CORO2B</i> <i>PAPPA</i><br/> <i>DHX40</i> <i>KIFC1</i> <i>POC5</i> <i>IGHVII-65-1</i> <i>TRPC7</i> <i>SYCP1</i> <i>VPS41</i> <i>DTX1</i> <i>MYO10</i> <i>GF11B</i> <i>ZNF407</i><br/> <i>MIR3118-4</i> <i>ASB3</i> <i>TENM3-AS1</i> <i>KIR3DL2</i> <i>GAGE12J</i> <i>TRIM43</i> <i>FOXO6</i> <i>TSHZ2</i> <i>C1orf21</i> <i>TOM1L2</i><br/> <i>STOX2</i> <i>FAR2</i> <i>BICRAL</i> <i>PLAGL1</i> <i>NEK7</i> <i>NKG7</i> <i>CNN2P12</i> <i>NLRP13</i> <i>COG2</i> <i>RPL5P35</i> <i>ERN2</i><br/> <i>CYP2C58P</i> <i>TLNRD1</i> <i>SERPINB2</i> <i>KSRI</i> <i>AOX3P</i> <i>LINC01322</i> <i>GABRB1</i> <i>ANKS1B</i> <i>RP1</i> <i>LUC7L</i><br/> <i>AKAP10</i> <i>TTL7</i> <i>EFCAB14</i> <i>SLC16A9</i> <i>WWC1</i> <i>PLEKHA3</i> <i>RSRP1</i> <i>BLM</i> <i>PLA2G4A</i> <i>SENP6</i> </p> |
|--|-----------------------------------------------------------------------------------------------------------------------------------------------------------------------------------------------------------------------------------------------------------------------------------------------------------------------------------------------------------------------------------------------------------------------------------------------------------------------------------------------------------------------------------------------------------------------------------------------------------------------------------------------------------------------------------------------------------------------------------------------------------------------------------------------------------------------------------------------------------------------------------------------------------------------------------------------------------------------------------------------------------------------------------------------------------------------------------------------------------------------------------------------------------------------------------------------------------------------------------------------------------------------------------------------------------------------------------------------------------------------------------------------------------------------------------------------------------------------------------------------------------------------------------------------------------------------------------------------------------------------------------------------------------------------------------------------------------------------------------------------------------------------------------------------------------------------------------------------------------------------------------------------------------------------------------------------------------------------------------------------------------------------------------------------------------------------------------------------------------------------------------------------------------------------------------------------------------------------------------------------------------------------------------------------------------------------------------------------------------------------------------------------------------------------------------------------------------------------------------------------------------------------------------------------------------------------------------------------------------------------------------------------------------------------------------------------------------------------------------------------------------------------------------------------------------------------------------------------------------------------------------------------------------------------------------------------------------------------------------------------------------------------------------------------------------------------------------------------------------------------------------------------------------------------------------------------------------------------------------------------------------------------------------------------------------------------------------------------------------------------------------------------------------------------------------------------------------------------------------------------------------------------------------------------------------------------------------------------------------------------------------------------------------------------------------------------------------------------------------------------------------------------------------------------------------------------------------------------------------------------------------------------------------------------------------------------------------------------------------------------------------------------------------------------------------------------------------------------------------------------------------------------------------------------------------------------------------------------------------------------------------------------------------------------------------------------------------------------------------------------------------------------------------------------------------------------------------------------------------------------------------------------------------------------------------------------------------------------------------------------------------------------------------------------------------------------------------------------------------------------------------------------------------------------------------------------------------------------------------------------------------------------------------------------------------------------------------------------------------------------------------------------------------------------------------------------------------------------------------------------------------------------------------------------------------------------------------------------------------------------------------------------------------------------------------------------------------------------------------------------------------------------------------------------------------------------------------------------------------------------------------------------------------------------------------------------------------------------------------------------------------------------------------------------------------------------------------------------------------------------------------------------------------------------------------------------------------------------------------------------------------------------------------------------------------------------------------------------------------------------------------------------------------------------------------------------------------------------------------------------------------------------------------------------------------------------------------------------------------------------------------------------------------------------------------------------------------------------------------------------------------------------------------------------------------------------------------------------------------------------------------------------------------------------------------------------------------------------------------------------------------------------------------------------------------------------------------------------------------------------------------------------------------------------------------------------------------------------------------------------------------------------------------------------------------------------------------------------------------------------------------------------------------------------------------------------------------------------------------------------------------------------------------------------------------------------------------------------------------------------------------------------------------------------------------------------------------------------------------------------------------------------------------------------------------------------------------------------------------------------------------------------------------------------------------------------------------------------------------------------------------------------------------------------------------------------------------------------------------------------------------------------------------------------------------------------------------------------------------------------------------------------------------------------------------------------------------------------------------------------------------------------------------------------------------------------------------------------------------------------------------------------------------------------------------------------------------------------------------------------------------------------------------------------------------------------------------------------------------------------------------------------------------------------------------------------------------------------------------------------------------------------------------------------------------------------------------------------------------------------------------------------------------------------------------------------------------------------------------------------------------------------------------------------------------------------------------------------------------------------------------------------------------------------------------------------------------------------------------------------------------------------------------------------------------------------------------------------------------------------------------------------------------------------------------------------------------------------------------------------------------------------------------------------------------------------------------------------------------------------------------------------------------------------------------------------------------------------------------------------------------------------------------------------------------------------------------------------------------------------------------------------------------------------------------------------------------------|



|                   |      |                                                                                                                                                                                                                                                                                                                                                                                                                                                                                                                                                                                                                                                                                                                                                                                                                                                                                                                                                                                                                                                                                                                                                                                                                                                                                                                                                                                                                                                                                                                                                                                                                                                                                                                                                                                                                                                                                                                                                                                                                                                                                                                                                                                                                                                                                                                                                                                                                                                                                                                                                                                                                                                                                                                                                                                                                                                                                                                                                                                                                                                                                                                                                                                                                                                                                                                                                             |
|-------------------|------|-------------------------------------------------------------------------------------------------------------------------------------------------------------------------------------------------------------------------------------------------------------------------------------------------------------------------------------------------------------------------------------------------------------------------------------------------------------------------------------------------------------------------------------------------------------------------------------------------------------------------------------------------------------------------------------------------------------------------------------------------------------------------------------------------------------------------------------------------------------------------------------------------------------------------------------------------------------------------------------------------------------------------------------------------------------------------------------------------------------------------------------------------------------------------------------------------------------------------------------------------------------------------------------------------------------------------------------------------------------------------------------------------------------------------------------------------------------------------------------------------------------------------------------------------------------------------------------------------------------------------------------------------------------------------------------------------------------------------------------------------------------------------------------------------------------------------------------------------------------------------------------------------------------------------------------------------------------------------------------------------------------------------------------------------------------------------------------------------------------------------------------------------------------------------------------------------------------------------------------------------------------------------------------------------------------------------------------------------------------------------------------------------------------------------------------------------------------------------------------------------------------------------------------------------------------------------------------------------------------------------------------------------------------------------------------------------------------------------------------------------------------------------------------------------------------------------------------------------------------------------------------------------------------------------------------------------------------------------------------------------------------------------------------------------------------------------------------------------------------------------------------------------------------------------------------------------------------------------------------------------------------------------------------------------------------------------------------------------------------|
|                   |      | <p> GATAD1 ZBTB16 DDX39AP1 UNK B4GALT6 ATG5 LINC01938 SGTB TRIM60P19 ZNF875<br/> XKR5 SCGN SYNJ2 STK32A ARSB IL34 ZNF234 CLVS2 DIO2-AS1 SIGLEC29P DPYSL5<br/> CWC27 AGK USP25 ASCC2 SLC44A1 CNM4 ADAM10 ATXN3 GALC MRPS22 TMC1 PLD5<br/> OXR1 PAK3 CAMLG TSPAN33 GARNL3 RNU6-1150P NPIPA1 TPM1 CES1P2 CIDEC EBF1<br/> DHTKD1 OB11-AS1 FLNB OR2T2 MADD PCID2 LINC00667 NDFIP2 DUX4L45 ZSWIM6<br/> MYL1 ANKRD36BP2 CAMK1G DSG1 C1orf87 LINC02327 FAM30A PDZPH1P ERICH3<br/> TRERF1 CENPBD1P1 TADA2A RPL15P2 LRRC9 LINC00158 FBN1 NIPAL2 MTUS1 GABRA6<br/> PTPRVP DHRS3 PRRC1 PANTR1 LASP1 VPS35L ABHD17C KRT6A C21orf91-OT1 GGT4P<br/> DROSHA ZNF813 ANKRD31 PALS2 ADCY10 FAM149B1 PDE1A TMPRSS2 LINC02165<br/> PTAR1 PRICKLE2 CMAHP ANGPT1 TRIM58 HMGA2 HHAT KLHL32 CHASERR PSTPIP2<br/> MVB12B C4orf50 LINC02253 UBASH3A CACNA2D3 SEL1L ELOC SLC7A2 TMEM67 BTF3L4<br/> MIR3936HG ZNF618 ITGA4 CPA6 AGO1 PRKCE DEFA3 GLYATL1 RBPJP5 PTPRK<br/> MIR3142HG CNTN3 GLIS1 ODAD2 ARHGAP31 RXRG ETNPPL KIR2DS4 PRKAA2 CD163<br/> ARMC3 BBS2 SYT1 OR4F15 LATS2 IKZF2 PPP1R12B APCDD1L-DT PDE2A DNMT3L ASPM<br/> RFC2 PPARA PLXNA2 KLHL33 DENND2C LINC01602 TBC1D13 CDYL2 SCARAS PRG4<br/> SCGB1D1 RANBP3L MARK2P12 TG ADGRB3 HGD SLC36A1 PLCB1 UBE2R2 KCNH8<br/> ATP6V0CP3 LAMB1 ANKRD19P RPS10P7 CUL5 HOMER2 DGKI RIN3 LINC01221 REG4<br/> LINC01151 DIP2B CD5L LINC01524 TBC1D30 IGLV2-14 NME7 STXBP6 TFDPI FAM66E<br/> ZBTB33 MX11 ZNF876P PPME1 TRAPPC8 OR4R3P STX12 LINC02291 FUT9 MOK GARS1-<br/> DT CREG1 LINC02488 SLC12A1 SCN2A MAPKAPK5P1 WNT7A TUBB6 ZNF449 DOCK10<br/> FAM27C PAMR1 DDX6 SPIRE1 TMEM71 COG5 AIMP1 UBE2E1 ARAP2 LDB2 LINC02149<br/> SNX30 ATP8A1 BCL2L1 IQSEC1 LINC02008 JARID2 LINC02236 SHROOM3 ADK PRR5L<br/> ALX4 CORIN FAM241A LINC00838 RANBP17 WNT2B MRPS27 PPM1L CPHL1P LRRC37A3<br/> TRIM43CP PRPF18 SMOC1 GSTA3 EXD3 SETDB2 FAH MON2 OR51E1 TMEM116<br/> TOGARAM1 SLC45A4 ZNF705B ELF2 SEMA3D LDLRAD3 GLYAT KIF15 CFTR VSX1 TBX20<br/> FLRT2 NFATC2 NALCN-AS1 PRAMEF25 KRTAP20-4 ARHGAP44 MTMR2 ZNF970P KCNH5<br/> FAM189A2 CADM1 KLHL29 PTPRO ARID3B OPRM1 ACER2 ZDHHC14 RGS9 YLPM1 ATF6<br/> ITFG1 IPO11 VCL SLC13A5 GLB1L3 ABCA9-AS1 DOCK5 VCAM1 C7orf31 LINC02511<br/> LINC01818 ATP6V1C2 MAGEL2 IFT81 NHSL1 OSCP1 PLEKHA8 SGO1-AS1 DTHD1<br/> SRGAP3 IGHV13-1 HAAO CTNNAL1 CIBAR1-DT CYP2A7P1 ATP6V0D2 SYNJ1 PHF20L1<br/> HLA-B KLF15 PPP2R2B NEDD9 HDHD5 IL12A-AS1 ANKRD66 ENPP1 SDR42E2 LYRM4<br/> CCDC150 DNMI1P47 LINC02099 HEMGN RIMS2 UGP2 RP1L1 PPM1F OR4K8P EFCAB6-<br/> AS1 CHSY3 YBX3 YAP1 ARL15 ANK3 BMPR1B LINC01173 FCRLA LINC01937 SEMA5A<br/> C1orf127 PRDM15 KITLG KRT6B SV2C DAW1 COL5A1 IGHV3-74 IFT57 LINC01426<br/> RIPOR2 MAP4K4 LINC02899 ZNF112 FICD KIF21B FEZ2 ATE1 PEG10 INHBA-AS1<br/> HSPD1P3 NMD3 OLA1 GATAD2B VPS13C ANKRD55 XIRP2 KRT85 SLC14A1 CA1 C5orf52<br/> FAM72C MFSB9 SERPINI2 STK38 APBB1P NPL CAST TBC1D9 FBXO32 AOA8 SNHG14<br/> TSBP1-AS1 SMG1P4 SNAI2 ZBTB49 FAM90A28P PHF2P2 AP4E1 DLEU1 NDFIP1 TNF<br/> FAM180A LHX9 LINC02074 OCA2 ST8SIA6 DAPK1 MSANTD2 FCHO2 RFTN2 TRAV8-6<br/> COL6A6 RN7SL767P DNAH5 CNTN6 CLIC6 LINC02406 FMN2 BHLHE40-AS1 SEMA3C<br/> VAV1 LINC00895 CACNA1I BTG3 DPY19L1 CSF2RB CMTM7 RPS6KA3 SMAD5 DNAJC13<br/> BCKDHB PPIL6 IGLV3-30 CNST PATL1 UBE2J2 ASB2 OTOPI PSME3IP1 OR4F6 GHRH<br/> UGT3A2 GOLGA8B RNLS IGLV4-3 SPOCK1 LINC02315 NF1P6 </p> |
| 4C-decreased-1200 | 1122 | <p> LRRC37A5P CCDC116 ZHX3 APOL2 RPS4XP6 PDCL3 PTPRR HERPUD2 CRTAM SLC52A1<br/> UBE2G1 PELI2 TPI1P1 NOS2 MIR548H4 ZEB1 LINC01708 FAT4 PARN SEMA4D SLC15A2<br/> RN7SL483P WSCD1 MIR4435-2HG KNDC1 LINC02355 ZFYVE1 EVC HERC2P2 LINC00670<br/> DMC1 CXADR SPPL2B C9orf43 DIP2A NBPF21P OR7E19P RIOK1 GGT2 UNC45B LUZP1<br/> LINC01346 BVES-AS1 ZNF723 LINC01138 CECR2 LINC01782 SMYD3 GNAS DYSF NPM1P2<br/> CD38 SERPINB9 LINC01876 PGBD5 LAIR1 MSH6 RASGRF1 HECTD2 FBXO31 C12orf40<br/> LINC01163 GMPR RIN2 PRDM16 FRRS1 PDE6C RNF217 TRAPPC9 LINC00323 MEIS2<br/> CARMIL1 PCDH7 BCL2 KL LRRC4C LINC02558 RACGAP1 MIR3667HG THADA NUP37<br/> PPP1R9A SAA3P TMEM117 KCNK15-AS1 TOX3 TDRD5 TASP1 SNX6 POTE6 GOLGA6L3<br/> SAMM50 ZZE1 FRA10AC1 HHLA2 NCF4-AS1 C3orf52 SLAMF1 UQC1 RGL1 ATP5BP3<br/> SHOC1 LINC00841 FAAP24 INO80D KDM6A MED27 NCAM1 PDYN-AS1 GDAP1L1<br/> LINC02096 LINC01358 UFL1 EPHA4 LINC01967 PLA2R1 LYSMD2 NGDN H1-9P ADAMTS2<br/> GTSF1L WARS2-AS1 CCDC172 FRYL LINC01828 GPRC5C COLCA1 CPAMD8 RNU6-929P<br/> GPR1-AS UBL7 LINC02675 CALM1P2 RBM6 MEGF10 IGHV2-70D HS1BP3 LIPI LINC01445<br/> RAB38 DZANK1 CLTCL1 NUA1 PCAT1 KCNK10 ZNF738 BLOC1S5-TXNDC5 SLC16A1-<br/> AS1 VMP1 NENF HRH2 VSTM4 ATP6AP1L RNU2-47P RDX SNTG2 CTSB SVIL NDRG2<br/> APBA2 TTC3 COL23A1 NEDD4L EDAR C5 EGF LINC00960 ATP2B2 HDGFL3 RPL37P3<br/> CCNYL3 ABCC12 PARK7 DSTYK RIMBP2 ZNF271P IFT43 ADAMTS19-AS1 SNRPC<br/> C2orf69P4 DRC7 DSE POTEJ LINC01427 MYCL LINC02256 TPTE2 SPAG6 BMP7<br/> PDE4DIP1 GALNT2 FGF12 EPHX4 CYP2C9 CNOT7 CASC9 IMPACT ITGA6 HHIPL1<br/> NOTCH2 IMPA2 ZFP90 S100B ARHGAP12 USP43 KCNN3 FKBP5 NFAT5 FLI1 ANAPC1 </p>                                                                                                                                                                                                                                                                                                                                                                                                                                                                                                                                                                                                                                                                                                                                                                                                                                                                                                                                                                                                                                                                                                                                                                                                                                                                                                                                                                                                                                                                                                                                                                                                                                                                                                          |

|  |  |                                                                                                                                                                                                                                                                                                                                                                                                                                                                                                                                                                                                                                                                                                                                                                                                                                                                                                                                                                                                                                                                                                                                                                                                                                                                                                                                                                                                                                                                                                                                                                                                                                                                                                                                                                                                                                                                                                                                                                                                                                                                                                                                                                                                                                                                                                                                                                                                                                                                                                                                                                                                                                                                                                                                                                                                                                                                                                                                                                                                                                                                                                                                                                                                                                                                                                                                                                                                                                                                                                                                                                                                                                                                                                                                                                                                                                                                                                                                                                                                                                                                                                                                                                                                                                                                                                                                                                                                                                                                                                                                                                                                                                                                                                                                                                                                                                                                                                                                                                               |
|--|--|-------------------------------------------------------------------------------------------------------------------------------------------------------------------------------------------------------------------------------------------------------------------------------------------------------------------------------------------------------------------------------------------------------------------------------------------------------------------------------------------------------------------------------------------------------------------------------------------------------------------------------------------------------------------------------------------------------------------------------------------------------------------------------------------------------------------------------------------------------------------------------------------------------------------------------------------------------------------------------------------------------------------------------------------------------------------------------------------------------------------------------------------------------------------------------------------------------------------------------------------------------------------------------------------------------------------------------------------------------------------------------------------------------------------------------------------------------------------------------------------------------------------------------------------------------------------------------------------------------------------------------------------------------------------------------------------------------------------------------------------------------------------------------------------------------------------------------------------------------------------------------------------------------------------------------------------------------------------------------------------------------------------------------------------------------------------------------------------------------------------------------------------------------------------------------------------------------------------------------------------------------------------------------------------------------------------------------------------------------------------------------------------------------------------------------------------------------------------------------------------------------------------------------------------------------------------------------------------------------------------------------------------------------------------------------------------------------------------------------------------------------------------------------------------------------------------------------------------------------------------------------------------------------------------------------------------------------------------------------------------------------------------------------------------------------------------------------------------------------------------------------------------------------------------------------------------------------------------------------------------------------------------------------------------------------------------------------------------------------------------------------------------------------------------------------------------------------------------------------------------------------------------------------------------------------------------------------------------------------------------------------------------------------------------------------------------------------------------------------------------------------------------------------------------------------------------------------------------------------------------------------------------------------------------------------------------------------------------------------------------------------------------------------------------------------------------------------------------------------------------------------------------------------------------------------------------------------------------------------------------------------------------------------------------------------------------------------------------------------------------------------------------------------------------------------------------------------------------------------------------------------------------------------------------------------------------------------------------------------------------------------------------------------------------------------------------------------------------------------------------------------------------------------------------------------------------------------------------------------------------------------------------------------------------------------------------------------------------------------|
|  |  | <p> GRM1 LINC02147 ARHGAP26 ITGB8 GAP43 LINC02422 OR4K3 PRDM13 PDE3A PTPN4<br/> BCAR3 MAP6 APOL1 CDH11 SETBP1 AIF1L CDS2 ZNF780B LINC01900 ATP6V1E1<br/> LINC01993 LMX1A AGBL1 RSPH3 DEFT1P2 LINC02439 ZFAND6 GBP4 CNKSR2 PSMA5<br/> DPH6-DT GFRA2 NEK10 ADCYAP1R1 SNX29 MAGI2-AS3 ZNF611 STAT1 SAMD5 MROH5<br/> SLC44A3-AS1 MYOCD CREM GOLGA8J XKR3 UBE2QL1 PLPPR5 TDP1 AVL9 EFEMP1<br/> TNRC6B WBP2P1 LINC02542 SYN2 PTC2 MYO1E SMOC2 MIPEP NCSTNP1 HDAC2-AS2<br/> HLCS FH RWDD2B PLPP4 STK10 PWRN4 CCDC102B SDS GSR CCDC162P LINC01571<br/> FIG4 SOGA1 ARHGAP32 BMF NECTIN1 FLT1 RB1CC1 ZNF528 LINC01222 LALBA NXN<br/> LINC00375 FOXJ3 CENPE CKMT1B MYL12B RSPH14 IL17RD ANKMY1 HCG22 APELA<br/> UBN1 PLA2G12B FAM83B HDAC4 CTNNA1 STK36 GNAI2P1 FAM102A NCOR1P1 TRPC5<br/> MYO9A TMEM182 IL10 LINC02305 AMFR LIFR-AS1 C19orf18 FTO SLC6A1 EPC2 DMXL2<br/> SEMI SEMA6A-AS2 MOGAT3 TMEM236 NLK THSD7A CXCL2 GOLGA6B LINC00334<br/> CARD10 ACSBG1 GCSAML DNPEP TRAPPC11 HOXC4 IGHV3-62 NECTIN4 CNMD<br/> LINC01309 UFD1 LINC00299 BAZ2B HERC2P3 CRACD NGF-AS1 AGL PALMD HS6ST1<br/> MARK2 MEOX2 SF11 ZBED9 CTSE ATF2 PLEKHB2 FAIM ZNF72P RPRD1A ZNF880<br/> PPP2R2A ESS2 PHAF1 ZNF541 RBBP8 AK6P2 CKMT1A RFC1 NSUN6 LINC02174 CDC45<br/> MC2R AKR1B1 BTBD11 LRP2 LINC02087 HERC2P9 SYNE1 MTHFD1L RALGPS2 HOATZ<br/> SNRK ABCD1P4 EXTL3 EHMT1 TTC29 FBXO47 KRT89P ZNF735 ZBTB10 PKHD1L1<br/> SLC9B1P4 PLPPR1 CEP192 SLC26A2 CAMK4 GUSBP11 CLPX OR7H1P ROCR<br/> ANKRD20A9P HDAC11 SLC9A4 ANKRD20A17P GRIK3 GRXCR1 NUMB STPG2 MIDEAS<br/> TM9SF2 CD70 CELF2 SH2D1B ZNF606 ESYT2 HEATR6 ARFGAP3 MAPRE2 FGF10 TAPT1-<br/> AS1 KRT18P59 ISX RAD51AP1 POTEM SYBU SMTN LINC01035 PDE4DIP SCG3 ESRP1<br/> RIC8B TAF3 ZMYM4 TPTE FRG1JP MED12L GRM7 ZDHHC21 BRMS1L DDHD1 ICA1<br/> PLEKHD1 CDH7 EMILIN2 TLDC2 CYCSP39 HORMAD2-AS1 VASP PLGRKT UBE2E2<br/> UNC80 SDE2 PTGFRN PPA2 ILDR2 IMP2L ZNF615 SPSB4 SPSB1 GABRG2 ZNF567 ITCH<br/> NUDCD3 MBP S100BP TANGO6 GABRA5 CELSR2 CDKN2C STXBP1 SLC46A3 PTPRJ<br/> DLC1 PNPLA7 SELENON RPS3AP4 CNIH1 FRG1BP C2orf69P3 LINC00114 ZIM3 MANBA<br/> DUX4L2 CHRM3 ECT2L UST MIR663AHG CALD1 LINC01543 AIG1 ERICH1 DEDD2 TYW1<br/> TAF15 ALB ARHGAP24 JPH1 ANKRD20A3P EFR3A HTR2A TPH2 N4BP2L1 IGHV1OR15-9<br/> TPTE2P6 EIF4BP3 LOXHD1 MDS2 GOLGA8G LINC01622 GALNT1 MARCHF1 OR4L1<br/> ZBTB25 INO80 RBM15-AS1 HSD17B14 KRT16P6 COL27A1 GLP2R CHCHD2 BMP5 SLC4A4<br/> ZNF675 LINC02366 GOLGA6L17P SYT16 CRYBG1 TWIST1 HACD2 LINC02653 LINC02061<br/> RPL15P3 TRIM77BP ERCC6L2 PASK PHKB RUFY2 SLC16A1 RANBP9 FAM245A MRTFB<br/> LINC01344 KCNE4 TRIM5 LINC02228 KRTAP21-3 LINC01801 LINC01320 LYPLAL1<br/> THNSL2 BRWD1 COLQ TMEM54 PPIP5K1 C9 TMTC2 HECW1 MCTP1 RNU1-51P MOB3B<br/> ACTR3C LCE1F ARPC3P2 MAP4 TSPAN11 MTND1P17 HIVEP1 ATRX TNIK KRT18P55<br/> OR1L6 NBN PRTG OR2T7 SLC17A1 SEC24D RGM B KMT2E WNK2 FRMD3 RBFOX3<br/> SDAD1P2 PWWP3A ITIH5 PACSIN2 TRGJ1 HOXC13 PKP1 SYNE2 GTF2IP6 MIR181A1HG<br/> TRMT61B TRIM23 FABP7 SDCCAG8 GK LINC00355 DUSP22 KCNJ18 CHSY1 RFC3<br/> MAB21L3 SMPD4 EXT2 PTPN12 GPR137B ZYG11A LINC00434 LINC02424 TOP3B MPPE1<br/> RGS3 UBA6-DT ANKRD26P1 CMIP DEFB116 SLC2A13 FBN2 YTHDF3 SPATA17 SYT10<br/> ZBTB38 LINC02380 CYFIP1 ALK DOCK8 GON4L GREB1 ARNT LINC01340 LINC00929<br/> CSTF3 ZNF648 LINC02058 SAMD13 DNAH6 ARFGEF3 TMC05A UHRF2 EPCAM-DT<br/> DCLK1 DEFT1P RNF215 ANKRD28 GRK3 SND1 IFNG-AS1 SNAP25-AS1 ZFAND4<br/> LINC01664 FGD4 ETS2 LINC00649 ZNF382 NDUFAF6 GOLGA6D ERMP1 CATSPERG<br/> ARL4C ITSN2 LINC01917 KTN1-AS1 HIRA OSER1-DT SERPINB7 ANKS6 TMEM74 PRKAA1<br/> RASGEF1C TAF4A ALDH1A2 GABRG1 MTTP POGK CROT MAPK9 ESRRG FBXW2<br/> LINC02458 LINC02652 LINC01229 FOXJ2 AGAP9 ABCC4 MYT1 FRG1HP ABCD2 ZNF595<br/> EMP1 TMEM171 LNCAROD RRAS2 SV2B FAM110A NRBP1 SEC14L3 STK38L GTF2F2<br/> RALGAP2 FAM245B ADAMTS19 ZNF236 RAB27B SOX30 LINC01337 MYOF P2RX6 PLS1<br/> UNC79 RSPH1 SPON1 ANK2 SH3GL3 CFHR4 INVS FHL2 NCAPG2 LPCAT2 LNP1 TPTE2P5<br/> PHF19 ADAMTS14 ZNF518A LINC02191 IGLV3-31 KYNU DCAF1 ZCCHC7 CD2AP TTC39C<br/> LINC02680 ZNF124 EBF3 TAF4A NFKBID SPRED1 MYO5A CIDEA LINC01924 PPP2R2C<br/> PWRN1 LINGO1 LINC01706 SEPTIN9 SMPDL3A LRFN2 ACO1 WDFY4 SCA1 PAPP2 LTN1<br/> TINAG NCOR1P3 DIRAS2 ABCB5 HEATR4 SLC5A9 KLHL4 DPY19L2 MDM1 RRBP1 SMPX<br/> OVOL2 CD9 MTMR10 EIF3F CDHR3 CSE1L NEK2P2 TOM1 FAM118A PRUNE2 SGMS1<br/> ANKRD24 COL25A1 RBPMS2 ITPR2 CYP4A11 BRINP1 IGLV2-34 MTND2P8 RPL23AP7<br/> GRB14 LARP6 RXFP1 IGSF5 LONP2 CCDC192 LEMD3 PEX6 CHKA BUB1 INTS4P1<br/> VPS13D KRTAP21-2 ZNF292 SPIN1 TBX15 PRB3 TTC3P1 KPNA1 SKA1 CCND3 LAMC1<br/> SRP9 SCGB2B2 GABPA SMIM11B DSG1-AS1 PCNX1 DUXAP10 LINC02091 NAA35 ATP5PF<br/> RPF2 UBAP1L MX2 AGGF1P10 MTCO1P1 ITGB3BP ZNF831 PRAMEF2 ENTPD5 DGKK<br/> SLC4A10 LINC00844 TSSC2 LIX1-AS1 TGM1 AGAP14P MGAM FTLP13 ZDHHC18<br/> LINC01310 PSG9 FAM183A UHRF1BP1L IL1RAPL2 AP1P MUC19 SCAPER IKBIP NPHP4<br/> LINC02141 OR8B9P CBLIF ATP6V1B2 KCNJ1 LRRTM4 CLCA4 PSAP LINC01877 MYOM2 </p> |
|--|--|-------------------------------------------------------------------------------------------------------------------------------------------------------------------------------------------------------------------------------------------------------------------------------------------------------------------------------------------------------------------------------------------------------------------------------------------------------------------------------------------------------------------------------------------------------------------------------------------------------------------------------------------------------------------------------------------------------------------------------------------------------------------------------------------------------------------------------------------------------------------------------------------------------------------------------------------------------------------------------------------------------------------------------------------------------------------------------------------------------------------------------------------------------------------------------------------------------------------------------------------------------------------------------------------------------------------------------------------------------------------------------------------------------------------------------------------------------------------------------------------------------------------------------------------------------------------------------------------------------------------------------------------------------------------------------------------------------------------------------------------------------------------------------------------------------------------------------------------------------------------------------------------------------------------------------------------------------------------------------------------------------------------------------------------------------------------------------------------------------------------------------------------------------------------------------------------------------------------------------------------------------------------------------------------------------------------------------------------------------------------------------------------------------------------------------------------------------------------------------------------------------------------------------------------------------------------------------------------------------------------------------------------------------------------------------------------------------------------------------------------------------------------------------------------------------------------------------------------------------------------------------------------------------------------------------------------------------------------------------------------------------------------------------------------------------------------------------------------------------------------------------------------------------------------------------------------------------------------------------------------------------------------------------------------------------------------------------------------------------------------------------------------------------------------------------------------------------------------------------------------------------------------------------------------------------------------------------------------------------------------------------------------------------------------------------------------------------------------------------------------------------------------------------------------------------------------------------------------------------------------------------------------------------------------------------------------------------------------------------------------------------------------------------------------------------------------------------------------------------------------------------------------------------------------------------------------------------------------------------------------------------------------------------------------------------------------------------------------------------------------------------------------------------------------------------------------------------------------------------------------------------------------------------------------------------------------------------------------------------------------------------------------------------------------------------------------------------------------------------------------------------------------------------------------------------------------------------------------------------------------------------------------------------------------------------------------------------------------------------|

|                  |      |                                                                                                                                                                                                                                                                                                                                                                                                                                                                                                                                                                                                                                                                                                                                                                                                                                                                                                                                                                                                                                                                                                                                                                                                                                                                                                                                                                                                                                                                                                                                                                                                                                                                                                                                                                                                                                                                                                                                                                                                                                                                                                                                                                                                                                                                                                                                                                                                                                                                                                                                                                                                                                     |
|------------------|------|-------------------------------------------------------------------------------------------------------------------------------------------------------------------------------------------------------------------------------------------------------------------------------------------------------------------------------------------------------------------------------------------------------------------------------------------------------------------------------------------------------------------------------------------------------------------------------------------------------------------------------------------------------------------------------------------------------------------------------------------------------------------------------------------------------------------------------------------------------------------------------------------------------------------------------------------------------------------------------------------------------------------------------------------------------------------------------------------------------------------------------------------------------------------------------------------------------------------------------------------------------------------------------------------------------------------------------------------------------------------------------------------------------------------------------------------------------------------------------------------------------------------------------------------------------------------------------------------------------------------------------------------------------------------------------------------------------------------------------------------------------------------------------------------------------------------------------------------------------------------------------------------------------------------------------------------------------------------------------------------------------------------------------------------------------------------------------------------------------------------------------------------------------------------------------------------------------------------------------------------------------------------------------------------------------------------------------------------------------------------------------------------------------------------------------------------------------------------------------------------------------------------------------------------------------------------------------------------------------------------------------------|
|                  |      | <p>SLC5A12 NCS1 ONECUT1 PCDH11Y METAP1D USP31 HIVEP2 SUMO2 OR5AQ1P MICOS10 XPNPEP1 GLYATL3 NUBPL PCGF5 FGF7P1 NLRC5 TUBBP9 LINC00363 NDUFAF2 GUCY1A2 KREMEN1 UMODL1 LINC01189 MB LINC00383 WDR25 SOD1P2 CYP4Z1 LCE3D TNPO3 EFHB ACSM2A FGF9 DCUN1D4 DAZL RPL23AP53 SLC1A1 HPCAL1 SPG21 ANKFY1 LIMCH1 ZKSCAN5 CCDC195 TSHZ3 TMCO4 LINC02098 RALA GMDS-DT BAZ2A MIR548A1HG RPS12 GNPTAB TRPM1 NTN1 COPS8 SACM1L AKAP9 C1QTNF3-AMACR AP4S1 NR5A2 PRKD1 TRAV8-1 TNFAIP8 RBM47 TMEM260 GBP6 SANBR DBF4B OR9Q1 CCL28 FBXO41 MICAL3 SNRPN HDAC2 MSI2 MRTFA LRRC7 LINC00221 ETS1 TNN CASZ1 PCDH8 LINC01673 WDHD1 MIR155HG MAMDC2-AS1 RABEP1 ST6GAL2 LINC00930 NUTM2HP SLX4IP PTCHD4 BANP ALKAL2 MAP2 YME1L1P1 TGFA SNX3 LINC01422 ZNF280B PTPRA CEACAM7 TNRC6C TMEM161A CYLD DEFB108B OR11G2 LINC02451 WSCD2 UBE3D GLIDR ZNF402P CAPN5 CERS3-AS1 RPL23AP87 GOLGA6C ABCA4 ZFAND3 LINC01718 THUMP2D C6orf118 FAM83F CNKSRI RAB12 TMEM163 PCDH9 LINC02235 DIPK1A SLF1 EXOC1L RBMS3 POTEH GNA14 INMT-MINDY4 LINC01992 SRFBP1 COPB1 MATN2 TM7SF3 IL33 EFCAB2 MARK4 CRACR2A CLEC16A LINC01901 OR2T3 SERPINB10 PROX1-AS1 ACTN1-DT ARHGEF17 ME3 PSG6 CACYBP ITGA9 PPP1R1C ULK2 IARS2 UNC13C CDC42BPB HNRNPH3P1 TMEM44-AS1 LINC00298 FAM217B MTRF1 FAM25G SHROOM2 OVCH1 CISD1 C16orf95 CRTAC1 EGLN3 PRKAB1 RALGAPA1 LMX1B LINC01748 L3MBTL3 RRAGD IGKV2OR22-3 POMT2 MICALL2 ST13 LINC02245 CLIP1 MARCHF8 SHC4 C2orf42 CABLES1 MORC2 ZNF613 TLL1 DEFA8P FRMD6-AS2 DUSP16 BCL11A AKR1C3 PPP2R5E ASB7 FREM1 IL20RB ADAM22 RABL2A PTGS1 LINC02582 LINC01811 CNIH3 RPF1 TRIT1 CEPT1 WNT5B CEP44 HKDC1 CLNS1A EPS15L1 HIP1 PVT1 CHN1 ETV6 WNT9B RFX7 TRPS1 SKINT1L IGKV3OR22-2 ADAMTSS NF2 STRN CRISPLD2 NPM1P1 ANTXRPL1 MTMR3 ZNF845 RN7SL250P FAM25C CRKL ITPRIP H2BC15 ADGRA3 SCG5 CLDN18 LINC00581 ADCY9 DPP10 TUBB2BP1 GALNT16 CDH5 ANO6 ZNF600 HIPK1 A2MP1 PGPEP1 ACSM2B TTC7B ATP2B1 IF144 RETREG1 NLRP14 NPHP3-AS1 PAH FAM138E ATRN FBLN5 CNOT6L TRAPPC6B TOP1 ZNHIT6 SLC39A6 WDSUB1 ANKRD20A7P</p>                                                                                                                                                                                                                                                                                                                                                                                                                                                                                                                                                                                                                                                |
| upregulated-1285 | 1133 | <p>TFIP11 UTP20 ERAL1 H2AZ2 TKT LRRC41 SLC25A3 IRAK1 G3BP1 NUP155 DDB1 RNU6-322P DAZAP1 EP300 MITF DDX5 IMP4 CLUH ZNF131 HROB MSH3 NOSTRIN LYAR SPN ARF6 IPO9 MED13L MRPL1 NOC4L MNS1 NAT10 FADS1 PCYT2 FAHD1 ARHGAP21 ACTR8 ENSG00000261770 STK25 SLK BSN NASP NOL8 BAZ1B GRPEL1 LMNB2 SDAD1 SLC25A46 INTS6 CLTA CEP350 RBM10 BCLAF1 TRA2B RAD23B STK17A CHRAC1 NEFH CCNY SSU72 TRUB2 IP6K1 SRSF6 ZNF598 POLE3 HSPD1 DUS3L BOP1 POLR1E C1orf216 CCAR1 EP400 GPN2 UBR3 TUBB KIAA0100 HNRNPR GCLM HBZ ZNF75A AD11 ZNF239 SAMSN1 SON PTP4A2 TRAM1 PSMD3 RHEB RAB35 OTUD6B NPM1 TSR3 XRN2 FUS CELF1 ABRAXAS2 SEC23IP CNOT1 RCSD1 DDX18 PPP2R5A CCT8 EIF3M SRP72 ZNF24 DDX49 CAPN1 TRIP12 BTF3 ATAD3B IKZF3 PRXL2C SETMAR EZR DYNC1H1 TMEM33 ABCF2 WDR6 ITFG2 DHX16 MIS18BP1 KIF2A HGH1 HSPA8 MRPL15 KCNQ5 DHX15 NEU1 WASHC5 SPRY2 LTBR NOP58 TBC1D9B SF3A3 FUBP1 HCFC1 AHNAK TRMT6 DHFR EIF4A3 ATP6V1C1 PRPF3 ALYREF UBE2N FAM83H ENSG00000286122 LINC02393 PPM1H NFYC SRRP1 STRIP1 ASXL2 CCDC6 MTHFD1 CYP3A5 FTH1 IER3 PITX1 IL17D GRWD1 JUND PHB2 LIN28B TNF MRT04 ERMAP DDX39A C1QBP TIMM17A ASAP1 PDSS1 HNRNPA0 AMMECR1 TCP1 BRCC3 TRAM2 KLHL21 EIF3D ZNF586 SET NAB2 FAM120A AURKAIP1 POLR1A TAF9 CRCP BICD1 CORO1C FTH1P16 JRK RANBP1 FDFT1 SQLE EIF5A WBP11 ZNF614 MCM10 TMEM69 TMEM185B GABRE HNRNPK ELF1 ICE1 SAFB2 BEGAIN OXA1L TRIM35 USP11 PRKDC PSIP1 EXOSC3 ADD1 NOL11 E2F4 IPO5 ACLY IK SURF4 NACA GPX4 CDK4 PRMT1 TEX10 CEBPZ MCM5 CLN6 CSNK2A2 SRRT RBM3 RABGGTB CUL3 NFATC3 KMT2B TSPYL5 MIX23 FASTKD2 HRAS RABL6 NR2F2-AS1 DHCR7 NUTM2B-AS1 SLC19A1 AHCTF1 VAT1 APEX1 CAVIN2 MRPL11 MYC UBE2L3 NAA15 ENSG00000279348 TOMM22 MUS81 ARID1B YES1 VCP ABT1 ARID2 SMG1 RAVER1 RCC1 SRSF3 CALM2 ENSG00000287905 WDR82 FUT8 ZNF74 RBMXL1 STMN1 NRROS ENSG00000282386 CWC25 MT-RNR1 NR2F2 PES1 MS4A3 ENSG00000288271 TRIM24 PTDS1 ENSG00000253853 CHTOP ENSG00000276742 ZFX HMGCR URB2 YBX1 STK24 NCOA5 H2BC12 BUB3 CTR9 CDC27 MCCC1 VPS35 VAC14 HNRNPH1 OR10Z1 CITED2 KPNA4 PFAS NUCKS1 HNRNPD U2AF2 YWHAG TRMT1 KMT2D ZMYND19 EIF5B WDR70 UTP25 LMNB1 MAF1 MT-RNR2 TFAM PUM2 PIK3C2B HHEX SRSF7 GTF2H1 VKORC1L1 ELOA PPP5C RNASEH2C PCLAF ACP5 WDR33 PRMT5 MAPK1 MPHOSPH10 CHD7 HNRNPA2B1 RNF126 UTP18 SBF1 API5 POLR1B PPP3R1 RBM45 FAM117A SH3YL1 RBM14 SF3A1 CAPNS1 EIF3A DANCER SEC24B LHX4 LINS1 CYB5B TNPO1 EEFD1 RRP1 TFAP4 SNX9 ANKRD36C WDR74 MCM7 POLDIP2 R1OK2 STAG1 DHX38 BTBD1 ABCF1 CDT1 CFL1 LRP8 MCOLN3 TGFBAP1 GPATCH3 PSMG1 TMEM43 EML4 PRPF8 SSB SKI TIMM23 ENSG00000289474 CTPS1 NUDC EIF3J EMP3 SYNCRIP DNAJC8 STAR JADE2 FARSA TRNT1 TXNRD1 TRMO STIP1 SART1 MTDH SPTA1 HSP90AB1 CCT3 MVK NOP14</p> |

|  |                                                                                                                                                                                                                                                                                                                                                                                                                                                                                                                                                                                                                                                                                                                                                                                                                                                                                                                                                                                                                                                                                                                                                                                                                                                                                                                                                                                                                                                                                                                                                                                                                                                                                                                                                                                                                                                                                                                                                                                                                                                                                                                                                                                                                                                                                                                                                                                                                                                                                                                                                                                                                                                                                                                                                                                                                                                                                                                                                                                                                                                                                                                                                                                                                                                                                                                                                                                                                                                                                                                                                                                                                                                                                                                                                                                                                                                                                                                                                                                                                                                                                                                                                                                                                                                                                                                                                                                                                                                                                                                                                                                                                                                                                                                                                                                                                                                                                                                                                                      |
|--|----------------------------------------------------------------------------------------------------------------------------------------------------------------------------------------------------------------------------------------------------------------------------------------------------------------------------------------------------------------------------------------------------------------------------------------------------------------------------------------------------------------------------------------------------------------------------------------------------------------------------------------------------------------------------------------------------------------------------------------------------------------------------------------------------------------------------------------------------------------------------------------------------------------------------------------------------------------------------------------------------------------------------------------------------------------------------------------------------------------------------------------------------------------------------------------------------------------------------------------------------------------------------------------------------------------------------------------------------------------------------------------------------------------------------------------------------------------------------------------------------------------------------------------------------------------------------------------------------------------------------------------------------------------------------------------------------------------------------------------------------------------------------------------------------------------------------------------------------------------------------------------------------------------------------------------------------------------------------------------------------------------------------------------------------------------------------------------------------------------------------------------------------------------------------------------------------------------------------------------------------------------------------------------------------------------------------------------------------------------------------------------------------------------------------------------------------------------------------------------------------------------------------------------------------------------------------------------------------------------------------------------------------------------------------------------------------------------------------------------------------------------------------------------------------------------------------------------------------------------------------------------------------------------------------------------------------------------------------------------------------------------------------------------------------------------------------------------------------------------------------------------------------------------------------------------------------------------------------------------------------------------------------------------------------------------------------------------------------------------------------------------------------------------------------------------------------------------------------------------------------------------------------------------------------------------------------------------------------------------------------------------------------------------------------------------------------------------------------------------------------------------------------------------------------------------------------------------------------------------------------------------------------------------------------------------------------------------------------------------------------------------------------------------------------------------------------------------------------------------------------------------------------------------------------------------------------------------------------------------------------------------------------------------------------------------------------------------------------------------------------------------------------------------------------------------------------------------------------------------------------------------------------------------------------------------------------------------------------------------------------------------------------------------------------------------------------------------------------------------------------------------------------------------------------------------------------------------------------------------------------------------------------------------------------------------------------------------------|
|  | <p> NCL GVINP1 GSPT1 CDK7 COPS3 HCG18 TMEM97 MCM2 MCM4 DCAF13 ARPC4<br/> TOMM70 ENSG00000286680 TARDBP TRIM28 DDX21 FKBP15 PWP1 COA7 METAP2 PAN3<br/> ALG8 RIOX1 MED15 SETD1B CDC37 PPP2CA POLR2A ODC1 ZNF26 PPRC1 HAT1 POLE<br/> DNTTIP2 ENO1 SBDS DDX1 AZIN1 HAND2-AS1 RNPS1 KIF1A NOL7 BCL7B PPP6C<br/> TOMM5 PSMC5 CBX3 ANKRD13A SETD1A SYPL1 FAM71F2 SLC39A10 ENSG00000227706<br/> ZNF512B ATP6V0A1 KIAA1586 BRD2 SLC7A1 TIRAP USP36 NONO ZC3H4 MAGOH<br/> ELAVL1 AGPAT5 CSTB SNHG6 VPS72 TCF20 SRM PPM1G AKAP8 XRCC5 CERT1 CUTALP<br/> NFKB1 FOSB H3-3B PCBP2 DUS1L MFAP1 ZNF789 TOMM40 VGF ADNP IGF2R RBM15B<br/> ENSG00000268362 POM121C LARP4 ZMPSTE24 HMGCS1 SNRNP200 RAB10 TOP2B PKP3<br/> DNM1L ZNF252P EXOC7 DEK PSPC1 UPF2 ALMS1 CERS6 BEND3 UBTF GYG1 PHB<br/> R3HDM1 RSF1 P2RY11 KCTD3 GAPDH IFRD2 RRP15 RSL1D1 SBNO1 ADNP2 RBM25<br/> B4GALT5 TPR BICRA MCMBP NAA11 WDR3 PROSER2-AS1 TNPO2 MTCH2 BACH2<br/> PPARGC1B ACTG1 PTDSS2 FAM13B CCDC78 HNRNPU SCAP NEMP1 DDX56 SRRM2<br/> PEBP1 HNRNPA1 ATXN1-AS1 DDX20 KAT7 UTP15 MYBBP1A CCT6A TCOF1 SF3B3 PIM2<br/> CPNE7 BAIAP2 INSIG1 GPR75 TEX15 ARID1A MBD1 RBM48 ARL8B STARD7 TRMT61A<br/> ZBTB40 NCLN CHST3 MT-TL1 RYBP MAEA NCR3LG1 C8orf82 SAFB S1PR3 TRMT2A RTL10<br/> LBR CBFA2T3 RNASEH1 IQGAP2 MYB CDC25A XRCC2 MMS19 PTGER3<br/> ENSG00000271971 KIF26B NBAS EIF4EBP2 DHCR24 LINC01963 ATP6V0D1 TAF4B AFF1<br/> MTA2 SLTM TBC1D14 AXIN1 MALT1 POLR1C ENSG00000288884 ENSG00000285730<br/> TFDP2 NDST1 NOSIP SNHG4 GOLM1 PELP1 LINC00645 KCTD15 C22orf46 EIF3B<br/> SMARCD1 TPP2 MED29 FASN METTL8 PCBP1-AS1 PSMA3 ASCC3 MECBP2 H4C8 CLDN11<br/> TMEM18 VPS26A FUBP3 CLCN6 SQSTM1 TMEM127 RALY ZNF274 ZNF581 DAP3 H2AW<br/> PHF3 DCBLD2 DVL2 BTG1 PSMC2 CAMSAP1-DT PCYT1A UBQLN4 RAP1GAP2 EZH2<br/> ATP11A TMEM223 SLC25A5 ENSG00000271781 PI4KA PRPF19 LSM14A TRIR C19orf25<br/> PQBP1 SMARCB1 CHEK1 LRRC58 WDR43 ATP13A3 KIF5B CCT2 NUP153 MACO1<br/> CLPTM1 XRCC6 DHDDS AGPAT3 ABO KCNH2 LETM1 DHX33 CHD3 TEX261 LINC00958<br/> SNRPA GATAD2A ARHGEF2 CASP8 N4BP2 DHX30 ENSG00000177788 CPSF7 PRDX1<br/> CASC3 SNU13 FBRSL1 BAG1 DSG2 HSPA4 ENSG00000266976 MMAB RRP9 SMC1A PSMG2<br/> GNB1L C11orf58 RBM19 RUNX1 CASD1 FADS2 MT-CYB MYO16 EGR1 SLC12A2 PDCD7<br/> GRSF1 EXOSC9 ZFP36L2 PBRM1 FTL VAPA TMPO PPP1CC PAXIP1 YY1 SLBP OXCT1<br/> LEPR AASDHPPT MCM3 ANAPC7 DELE1 DDX42 FES YJU2 PITHD1 RPUSD1 FAF1 CDK6<br/> RRP36 CSK MRRF RAPGEF1 SUB1 PRPF6 NAA20 ZNF587B SMARCA5 TIMM10B SF3A2<br/> ARPP19 RIF1 COPS2 H4C5 NAA50 MRFAP1L1 LMO2 RBBP4 PDPR CSNK1G2 DOLPP1<br/> RPL22 SCD SLC38A2 WDR36 CCDC86 MYH10 SPIN4 THOC1 STXBP5 ENSG00000176349<br/> DNAJA1 NOP16 PCNX4 GFM1 RAD51C AP5M1 ENSG00000272341 ADO DPYS TGFBR1<br/> GBP2 LRPPRC RRS1 TICRR TULP4 PRRC2C HNRNPUL1 ECSIT QRFP DCAF7 CLCN7<br/> POLR3E SLC12A9 TXNL1 THG1L SPECC1 PPIA PPP1R10 VDAC1 TJP1 MED6 TPRN<br/> DHX37 ARFGAP2 AATF PRMT6 CENPN TAF4 RETREG2 NXF1 RRP1B DKC1 GART<br/> SLC24A2 THOP1 TFRD DNAJB6 DHX34 DDX46 AK2 ZNF787 PRPF38B KAT6A EPRS1 ILF3<br/> MLLT3 PLK4 KEAP1 MED16 POLR3C NUP50 DRG1 BEX4 MRPS30 GAB2 MT-ND1<br/> SLITRK6 CTCF ATAD3A TRIP13 CLTC ZNF521 RPRD2 SRSF8 PTBP1 USP37 RAN MCCC2<br/> HEATR1 UFC1 NSDHL KDM3B POLR2D LSS ETF1 GAR1 EIF4G1 HNRNPC ZC3H18 SF1<br/> HSP90AA1 CASP3 FTH1P7 LRRC47 RANBP3 PPAN YWHAB DHX9 BAG6 EIF4B OR2AT4<br/> KIFC3 STX3 PHF5A NCAPH WDR81 ZNF45 AP5Z1 PTMA NAPA SNHG3 GNL3L UHRF1BP1<br/> SGPP2 BRD9 PRKAR2B ST3GAL2 PGAM5 EEF2 RPIA CHCHD3 RBM12 RFWD3<br/> ENSG00000234160 NUP98 SNHG20 NIP7 RNF220 PRPF4 ENSG00000255099 ZC3H7B<br/> UROD COMMD4 SACS NT5C3A NIFK WDR46 CAPZA1 DNAJA2 ZNF512 CSTF2 LYN ZFP91<br/> AHSA1 TFB2M FRMD8 NUP188 NOP56 RAI1 MT-TF BPTF TASOR2 DENR TXK DNMT1<br/> ENSG00000284024 FAM136A FOXRED2 ENSG00000261342 AIFM2 CYP20A1 AAMP<br/> CAPRIN1 NLN HNRNPF RREB1 NQO1 HSPA9 SRSF10 RBM42 UTP3 ENSG00000279669<br/> NUP160 HNRNPDL DOK3 FOS EMD CMPK1 PUS7 ZNF451-AS1 XPO1 GNAQ LINC02434<br/> PDZD8 PABPC4 ACAT2 SRSF1 IDI1 GLUL DIAPH1 ZDHHC5 RRM2 ELOVL6 C19orf48<br/> HNRNPAB SLC20A1 SLC30A10 FEN1 PPIF IPO7 PCM1 NOB1 STRBP GTF3C4 NAV1 PATZ1<br/> LINC00342 ABCF3 ELOF1 NCBP1 PLAGL2 PDCL3P4 CTSL SNHG17 SMG5 ANK1 EDC4<br/> GLYR1 PPP4R3A UBE4B TRIM44 CTDSP1 TRRAP LRWD1 AP3D1 ATP6V1G1 LRRC59<br/> KHSRP LYL1 DDX54 MED28 BAP1 KMT2A ZEB2 GDI2 HIF1AN WTAP ACSF3 TMEM201<br/> JMJD1C STK35 CCNH SURF6 MLLT10 RRM1 PA2G4 RRP12 MRPS2 NSRP1 RILP HSPH1<br/> THUMPDI ACTB MSRA UBA2 CMBL SRSF2 DDX51 TCF3 SERPINE1 WDR5 NVL RANBP10<br/> PSMD1 TIMM44 PRPF38A SPART-AS1 RNF40 NOL9 SLC29A2 RBMX CDC123 CIZ1 MDN1<br/> BCCIP DYRK1A SLC9A3-AS1 SLC38A1 ARHGAP6 PAICS DNAJB12 PDSSA CRK NCAPH2<br/> TCF7L2 PKM DDX23 ARHGDI1A RBM8A CDV3 ZFR HNRNPA3 QSER1 NOLC1 CANX<br/> CUL4A ENSG00000286064 MCM6 PABPC1 TMX2 SNRPD3 TSR1 ENSG00000247934 CCT5<br/> MCRIP2 FBXO45 RPUSD4 SNRPB ULK3 ENC1 PNO1 SS18L1 CNPPD1 GTF3C6 SREK1<br/> SF3B4 PSMC3 UBP1 SAE1 ZNF282 CERS2 HDGF SUPT6H SETX WWP2 ZNF326 PAF1 </p> |
|--|----------------------------------------------------------------------------------------------------------------------------------------------------------------------------------------------------------------------------------------------------------------------------------------------------------------------------------------------------------------------------------------------------------------------------------------------------------------------------------------------------------------------------------------------------------------------------------------------------------------------------------------------------------------------------------------------------------------------------------------------------------------------------------------------------------------------------------------------------------------------------------------------------------------------------------------------------------------------------------------------------------------------------------------------------------------------------------------------------------------------------------------------------------------------------------------------------------------------------------------------------------------------------------------------------------------------------------------------------------------------------------------------------------------------------------------------------------------------------------------------------------------------------------------------------------------------------------------------------------------------------------------------------------------------------------------------------------------------------------------------------------------------------------------------------------------------------------------------------------------------------------------------------------------------------------------------------------------------------------------------------------------------------------------------------------------------------------------------------------------------------------------------------------------------------------------------------------------------------------------------------------------------------------------------------------------------------------------------------------------------------------------------------------------------------------------------------------------------------------------------------------------------------------------------------------------------------------------------------------------------------------------------------------------------------------------------------------------------------------------------------------------------------------------------------------------------------------------------------------------------------------------------------------------------------------------------------------------------------------------------------------------------------------------------------------------------------------------------------------------------------------------------------------------------------------------------------------------------------------------------------------------------------------------------------------------------------------------------------------------------------------------------------------------------------------------------------------------------------------------------------------------------------------------------------------------------------------------------------------------------------------------------------------------------------------------------------------------------------------------------------------------------------------------------------------------------------------------------------------------------------------------------------------------------------------------------------------------------------------------------------------------------------------------------------------------------------------------------------------------------------------------------------------------------------------------------------------------------------------------------------------------------------------------------------------------------------------------------------------------------------------------------------------------------------------------------------------------------------------------------------------------------------------------------------------------------------------------------------------------------------------------------------------------------------------------------------------------------------------------------------------------------------------------------------------------------------------------------------------------------------------------------------------------------------------------------------------------------|

|  |  |                                                                                                                                                                                                                                                                                                                                                 |
|--|--|-------------------------------------------------------------------------------------------------------------------------------------------------------------------------------------------------------------------------------------------------------------------------------------------------------------------------------------------------|
|  |  | TRMT10C GMPS EIF4G2 DLAT CDC5L KPNB1 KHDRBS1 NORAD NFILZ PSME3 RELN ST7<br>METTL3 HMGA1 SUPT7L PARD3 ATP2A2 POM121 PNN DDX3X NUP62 HNRNPL PGD<br>UBE2Q1 SMG9 CUTA NDC1 WAC CEROX1 EIF3G AMD1 PRMT7 MAD2L2 MAT2A URM1<br>PAK2 RBL1 CENPF IGF2BP1 ZNRF1 GNL2 SNX17 DCLRE1C UBC <b>HBG1 HBA2</b> PUM1<br>RAB7A ZNF622 ATP5MC3 MTCYBP18 <b>HBA1</b> |
|--|--|-------------------------------------------------------------------------------------------------------------------------------------------------------------------------------------------------------------------------------------------------------------------------------------------------------------------------------------------------|

**Table S11.** Venn diagram showing the intersections of downregulated genes ( $p$ -value < 0.05) with lists of genes that reveal an increase or decrease in rDNA contacts. Related to Figure 3D.

| Names                                           | total | elements                                                                                                                                                                                                                                                                                                                                                                                                                                                                                                                                                                                                                                                                                                                                                                                                                                                                                                                                                                                                                                                                                                                                                                                                                                                                                                                                                                                                                                                                                                                                                                                                                                                                                                                                                                                                                                                                                                                                                                                                                                                                                                                                                                                                                                                                                                                                                                                                                                                                                                                                                                                                                                                                           |
|-------------------------------------------------|-------|------------------------------------------------------------------------------------------------------------------------------------------------------------------------------------------------------------------------------------------------------------------------------------------------------------------------------------------------------------------------------------------------------------------------------------------------------------------------------------------------------------------------------------------------------------------------------------------------------------------------------------------------------------------------------------------------------------------------------------------------------------------------------------------------------------------------------------------------------------------------------------------------------------------------------------------------------------------------------------------------------------------------------------------------------------------------------------------------------------------------------------------------------------------------------------------------------------------------------------------------------------------------------------------------------------------------------------------------------------------------------------------------------------------------------------------------------------------------------------------------------------------------------------------------------------------------------------------------------------------------------------------------------------------------------------------------------------------------------------------------------------------------------------------------------------------------------------------------------------------------------------------------------------------------------------------------------------------------------------------------------------------------------------------------------------------------------------------------------------------------------------------------------------------------------------------------------------------------------------------------------------------------------------------------------------------------------------------------------------------------------------------------------------------------------------------------------------------------------------------------------------------------------------------------------------------------------------------------------------------------------------------------------------------------------------|
| 4C-increased-1307<br>downregulated-1147<br>0,05 | 62    | TTC37 TEAD1 TIAL1 ASS1 IL6R ASAP2 SUSU6 USP18 TMOD2 YPEL1 WSB1 WDR26<br>MAG11 GALNT10 ZNF608 BPNT1 KDM7A BBS4 CPEB4 COL6A5 ZFYVE28 GAS2<br>TP53111 GNG7 ERO1B RAPGEF2 FNDC3B PFKFB4 MYLK3 NCOA7 AKAP11 TTC33<br>MAP3K9 MBNL2 DNAH14 ERI1 ARHGEF12 LYPLA1 ZNF397 SEMA3E TMEM273 CFH<br>INTS8 PAPP A CNN2P12 KSRI LUC7L TTLL7 TSPAN33 GARNL3 DHTKD1 FLNB PRRC1<br>PTAR1 LAMB1 GARS1-DT TMEM116 ATF6 PLEKHA8 HLA-B KIF21B CMTM7                                                                                                                                                                                                                                                                                                                                                                                                                                                                                                                                                                                                                                                                                                                                                                                                                                                                                                                                                                                                                                                                                                                                                                                                                                                                                                                                                                                                                                                                                                                                                                                                                                                                                                                                                                                                                                                                                                                                                                                                                                                                                                                                                                                                                                                       |
| 4C-decreased-1200<br>downregulated-1147<br>0,05 | 54    | SPPL2B DIP2A SMYD3 DYSF FRRS1 RNF217 FRA10AC1 UFL1 VSTM4 CTSB NDRG2<br>HDGFL3 DSTYK IMPA2 APOL1 AIF1L RSPH3 STK10 CCDC162P BMF FLT1 RB1CC1<br>AMFR DMXL2 CELF2 SYBU SMTN PDE4DIP SCG3 EMILIN2 CELSR2 PTPRJ<br>SELENON AIG1 PHKB TMEM54 SEC24D EXT2 P2RX6 ADAMTS14 KYNU ITPR2 RXFP1<br>VPS13D CCND3 PSAP HIVEP2 CYLD CAPN5 DIPK1A COPB1 EGLN3 PTGS1 HIP1                                                                                                                                                                                                                                                                                                                                                                                                                                                                                                                                                                                                                                                                                                                                                                                                                                                                                                                                                                                                                                                                                                                                                                                                                                                                                                                                                                                                                                                                                                                                                                                                                                                                                                                                                                                                                                                                                                                                                                                                                                                                                                                                                                                                                                                                                                                            |
| 4C-increased-1307                               | 1245  | FSTL1 CD44 PLCE1 SLMAP FAM219A FARP1 KCNMA1 PKNOX2 ARHGAP5-AS1<br>APBB2 ZNF684 KLHL13 GLT1D1 ABCB7 COX7A2L FYB2 RNF38 AHDC1 LINC02073<br>CUBN SLC10A7 LDB3 PAK1 SCAF8 SLC6A11 B9D1 CPXM2 RTN1 KIRREL1 LINC01467<br>PEBP4 PPP1R13B FGR TOP3A EPN2 LINC01491 LINC02664 THRAP3 INIP NSMCE2<br>ZNF208 RCL1 PRSS51 SLC25A52 OAZ2 ZNF718 DKK2 GLRA4 OR7A17 DHRS11<br>PCAT19 CCDC34 TAOX3 DNAJC27-AS1 PUM3 ZNF66 LINC02563 SCYGR8 LRUGK<br>TENM4 TRPM6 FAAHP1 LINC01479 FOXK2 CCDC106 SLC8A1 SMIM35 ANLN<br>ARHGEF26-AS1 SLC1A7 LGI2 ANKRD6 KCNC1 ADGRE3 GPR55 DNAJC15 Tafa2<br>STAU2 PGAP4 SIAH3 RIPK4 TMEM63C ZNF257 USP14 ST8SIA4 HYDIN2 ADGRE4P<br>IGLV3-2 USP7 CD82 KIR2DL4 FAM167B ARL13B SCP2 TMEM156 ABHD2 ALCAM<br>DENND1A SEC14L1 ERLIN2 ATP11C PDZRN3 SF3B6 LIMD1 ADAM32 RSRIC1 DNAH11<br>ZSCAN5C NIPBL CEP120 B3GALT5 CDC42EP3 MICU1 FAM204A SNX25 MYO5C SDC2<br>OTX2-AS1 ATF1 SLC25A21 SLC22A14 SAMD12-AS1 RBPJP6 C12orf4 TTLL11<br>LINC01579 NEBL DIDO1 RARB CCDC18 CDH8 AGPS TRPV5 HEPHL1 WDR12 PJA2<br>KLHL7 TCF4 ECM1P1 GACAT3 RPRD1B AURKA LINC01145 PTPN2 AP3B1 PBLD<br>GORAB ERICH5 BCAP29 PHACTR1 TTC21B PSMF1 SLC5A4-AS1 SH3PXD2A NEK6<br>OPA3 SLC39A12 MOB1B ORI3C9 UIMC1 SEMA3F-AS1 YIPF6 TMEM25 OSBPL10 RIC3<br>CASP5 EXOC1 RNF182 RALGPS1 UPP2 PHF21B GUSBP1 ZFPM2 PIEZO2 FAM66A<br>BCRP2 SVEP1 FANCA DEUP1 ZNF354C LINC02325 LRRIC2 ANKRD26 RGS20<br>MIR3118-2 PDGFD CNDP2 HCRTR1 TLK1 CREBBP RELL1 LINC02176 BRINP3<br>LINC01237 KIF4A XRCC4 OVCH2 FAM193A COP1P1 EPHA7 MAP7 TM9SF4 SENP8<br>NSG2 ZBTB80S MIR17HG GRIA1 ZNF627 IFNAR1 KIAA0319L USH2A LHFPL6 OPN3<br>NEGR1 NAV2 XXYLT1 CACNG2 ANO10 BTBD9 SPATA48 CA5A FAM72D NET1 TTC28-<br>AS1 BMP2 TOX KIAA0232 LINC02011 SRGAP2C SLC44A5 FAM107B LUZP2 BTBD10<br>SH2D3C MELK RBPJP2 LRIG1 PRKACB ZNF536 RIMS1 GXYLT2 HIPK3 EPB41L3<br>TMEM225 POR LINC00896 PARVB MORC1 ORI0H2 ZBTB7C SCGB1D5P KANK4 GAST<br>SGO1 SAR1A SLC37A1 SUPT16H BCL11B LINC01814 DTWD2 LINC01213 NELL2<br>TSPAN2 NIPA2 SLC14A2 LINC02668 OR52B3P ASAH2B RALB MOSMO KRTAP19-10P<br>BLK PPP1R17 PIAS1 PTCSC3 LRRFIP1 LINC02180 CTDPI SSBP2 ZNF705CP FHIP2A<br>CFAP74 ZNF846 HAGLR ZNF287 ARMC2 FER1L6 ALS2 CYTH4 COMMD8 PTGER4P2<br>TBATA ATL1 SERPINB11 ZDHHC17 KCNH1 ABCC9 SNAP29 SQSOX2 GSG1L MCF2L<br>LINC01098 ACS53 BBOX1-AS1 ABCD3 DCDC1 NPAS2 DIAPH3 CCSER2 INTS7 AMPH<br>ASB4 TMEM178B COL5A3 COL4A2 PARP15 ME2 GRAMD1B SIAH2 POLR3A ZNF44<br>LINC00536 HEATR5A ADA2 PRKCZ F13A1 ALG10B CDC14B GIPC2 RNU6-1007P<br>HECTD1 CYP4F22 ABCA10 LINC01182 KLHL1 SP110 LINC01566 PRSS2 MRM1<br>ZNF705D ATP9A POSTN BIRC6 OLFM4 SAMHD1 OCLN AK8 SDF4 ITGBL1 TNFSF11<br>SPOP EFHD2 EGFR MYEOV ADAM28 MRPL13 B4GALNT3 AFAP1 DPY19L2P1 |

|  |                                                                                                                                                                                                                                                                                                                                                                                                                                                                                                                                                                                                                                                                                                                                                                                                                                                                                                                                                                                                                                                                                                                                                                                                                                                                                                                                                                                                                                                                                                                                                                                                                                                                                                                                                                                                                                                                                                                                                                                                                                                                                                                                                                                                                                                                                                                                                                                                                                                                                                                                                                                                                                                                                                                                                                                                                                                                                                                                                                                                                                                                                                                                                                                                                                                                                                                                                                                                                                                                                                                                                                                                                                                                                                                                                                                                                                                                                                                                                                                                                                                                                                                                                                                                                                                                                                                                                                                  |
|--|----------------------------------------------------------------------------------------------------------------------------------------------------------------------------------------------------------------------------------------------------------------------------------------------------------------------------------------------------------------------------------------------------------------------------------------------------------------------------------------------------------------------------------------------------------------------------------------------------------------------------------------------------------------------------------------------------------------------------------------------------------------------------------------------------------------------------------------------------------------------------------------------------------------------------------------------------------------------------------------------------------------------------------------------------------------------------------------------------------------------------------------------------------------------------------------------------------------------------------------------------------------------------------------------------------------------------------------------------------------------------------------------------------------------------------------------------------------------------------------------------------------------------------------------------------------------------------------------------------------------------------------------------------------------------------------------------------------------------------------------------------------------------------------------------------------------------------------------------------------------------------------------------------------------------------------------------------------------------------------------------------------------------------------------------------------------------------------------------------------------------------------------------------------------------------------------------------------------------------------------------------------------------------------------------------------------------------------------------------------------------------------------------------------------------------------------------------------------------------------------------------------------------------------------------------------------------------------------------------------------------------------------------------------------------------------------------------------------------------------------------------------------------------------------------------------------------------------------------------------------------------------------------------------------------------------------------------------------------------------------------------------------------------------------------------------------------------------------------------------------------------------------------------------------------------------------------------------------------------------------------------------------------------------------------------------------------------------------------------------------------------------------------------------------------------------------------------------------------------------------------------------------------------------------------------------------------------------------------------------------------------------------------------------------------------------------------------------------------------------------------------------------------------------------------------------------------------------------------------------------------------------------------------------------------------------------------------------------------------------------------------------------------------------------------------------------------------------------------------------------------------------------------------------------------------------------------------------------------------------------------------------------------------------------------------------------------------------------------------------------------------|
|  | <p> SH3BP5 SLC49A4 FANCM NEO1 MELTF MXRA7 MYT1L SRGAP2B SLC37A2 ATP1A1-AS1 SORCS3 PDP2 VPS37A LRRC49 ERP27 ZNRF3 ZBTB21 TENM3 ITPKB ENPEP TUSC3 IPCEF1 RTRAF NF1P9 OR4K6P BIN2 LINC00877 TCERG1 PHACTR2 UBE2O VENTX DIRC3 PLCZ1 NCOR1 LINC02213 PRDM10 EBF2 DNAJC21 C16orf72 USP33 ERBIN RNY4 SLC24A4 ZNF573 MBTPS2 KHDC4 C2 NTF3 OR6C75 ZNF705G LINC01684 PI4K2B USP41 RBMX2 FAM72A IL17RA SOX1-OT SUSD4 PTH GALNT14 RAB22A H2ACP1 FAM66C ZNF160 LINC00466 HADHB NSMCE1 DNAH10 PDE10A CACNB2 REPS1 MAP3K4 PDXDC1 MTPN MT1HL1 LINC02646 INTS13 VSTM2A RUNX2 DDX10 ZNF804B LRP12 LRRC8B CSNK1G1 ZNF169 MICU2 SOX6 JAZF1-AS1 SGCD RC3H2 LINC01492 RNU6-374P TNNI1 RAC1P3 SP3 STK32B PLG ZNF106 LINC01020 NR2C1 SLFN11 ADAMTS3 DNAH8 NHS LINC02505 CABYR LINC01476 ANK3-DT CLSPN RGS12 PPP6R3 ZNF438 GUCD1 PPIP5K2 GTF2I NCK1 SOHLH1 LINC01192 CDV3P1 C15orf32 PUDP KDM1B SSPN HS3ST2 F5 PATJ FAT1 NUP50-DT CPS1 MESD PRKCH EBNA1BP2 TRAK1 TET1 FAM66B RHPN2 ANKRD30A RABGAP1L KRT25 NMU DENND2B LINC00603 SNX8 HADHA CFDP1 LINC00944 SMARCAD1 MIR3118-3 ADAMTS9-AS2 ASTN1 GNG12-AS1 GFRA1 NSG1 RMST ANKRD20A8P MAPKBP1 CPE TDRD7 RNF8 LY86-AS1 LINC02613 NSMAF PYGO1 LINC01723 NFKBIA TEX29 DNAL1 TRAPPC3 CD101 TMEM132D GSE1 HMCN2 FHIPIA EFCAB8 LINC01204 SPRED2 SCN10A HSDL2 ANKRD18A ZNF350-AS1 CEP128 ZC3H15 LINC01135 ANKRD7 ABCA5 PTCSC2 CIB4 ABCC8 TTLL5 NOXRED1 TMTC1 MOCS2 NRK NAT1 KICS2 CYBRD1 MCPH1 MINAR1 EIPR1 STON1-GTF2A1L BMP2K LINC02543 CYFIP2 APOOP5 CCDC126 BABAM2 MSANTD4 CRB1 ILIR1 OTOG HEPACAM USP8 NUDT21 XPO7 ARSJ KCNS3 ENPP3 ZNF235 ERC1 LINC02006 VWA3B ZNF850 ALPL PDLIM5 ABLIM1 XYLT1 BTAF1 PDCCD61PP2 ALPK2 LINC02660 ABCA13 HNRNPCP9 RFX2 MAPK8IP1 ADGRB1 SLC66A1L LYPLAL1-DT ADGREI UCK2 RAP1GDS1 FOXO1B TET1P1 ST8SIA5 TBC1D19 RPTOR ZNRF2P2 STT3A PDE6A CHST8 BID COX5A MACF1 MDFIC MNAT1 PCMTD2 STAR4-AS1 TC2N TUBGCP3 BTLA LGALS9DP SLC15A5 ECHDC1 HCP5 AMBRA1 CLEC20A NETO2 DOCK2 SERPINA6 ASCL3 PTPRE IFT46 FAM66D NUP210L LINC02063 TSPAN3 ALPK3 LINC02465 FLVCR1 SLC9A5 MUSK EPDR1 MYO3B LMNTD1 RAB8B LINC00583 MYOM1 ZSCAN30 MTCO2P3 LINC00469 RNU6-835P RXRA CGAS ARHGEF7 SLC23A2 LIN54 LINC01649 ARPP21 ACACA ARL11 MAML2 SPAG16 ADAM5 TRIM43B ZNF879 MAN2A2 LNPEP DDX39BP1 LINC02198 UNC93B3 RPS3AP6 CDK12 POU1F1 KIAA1958 CARD18 LINC00623 NEDD4 RFTN1 CCDC141 NEK4 RSU1P1 PEX14 CFAP61 FYCO1 LPGAT1 CNTN4 FOLH1 HRH4 SPRR2D LRRC38 EXOC6B EVC2 AFG3L2 CNKSR3 USP49 DRAXIN CSF1 CEACAM22P LINC02109 LINC00511 SLC8A3 TRNAU1AP LINC02145 RNF17 HAS2-AS1 KIF11 LINC02400 SLC2A3 FAM72B PRAMEF26 SLC40A1 PHC3 STOML1 CADM2 SDR42E1 LINC01581 FANCL SH3GLB1 GABRR2 RAPIGAP PIK3C3 OTULINL RAD9A SLC9C1 SCML2 SPOPL MAGI3 LINC00701 TRAF3 MPPED1 CCDC122 CHD6 FAM135B MORN1 CCDC186 PAXIP1-AS2 LINC01695 PTPRB LINC01412 ITGA1 VN1R7P MARCHF6 CCNG2 ATG4B CIBAR1 ODR4 GAGE13 TANC1 CORO2B DHX40 KIFC1 POC5 IGHV11-65-1 TRPC7 SYCP1 VPS41 DTX1 MYO10 GF11B ZNF407 MIR3118-4 ASB3 TENM3-AS1 KIR3DL2 GAGE12J TRIM43 FOXO6 TSHZ2 C1orf21 TOM1L2 STOX2 FAR2 BICRAL PLAGL1 NEK7 NKG7 NLRP13 COG2 CCDC138 MTOR RPL5P35 ERN2 CYP2C58P TLNDR1 SERPINB2 AOX3P LINC01322 GABRB1 ANKS1B RPI AKAP10 EFCAB14 SLC16A9 WWC1 PLEKHA3 RSRP1 BLM PLA2G4A SENP6 LARP1 GATAD1 ZBTB16 PSMB2 DDX39AP1 UNK B4GALT6 ATG5 LINC01938 SGTB TRIM60P19 ZNF875 XKR5 SCGN SYNJ2 STK32A ARSB IL34 ZNF234 CLVS2 DIO2-AS1 SIGLEC29P DPYSL5 CWC27 AGK USP25 ANKRD11 ASCC2 SLC44A1 CNM4 ADAM10 ATXN3 SPEN GALC NAP1L4 MRPS22 TMC1 PLD5 OXR1 PAK3 CAMLG KANSL1 RNU6-1150P NP1A1 TPM1 CES1P2 CIDEA EBF1 CRIM1 OBI1-AS1 OR2T2 MADD PCID2 LINC00667 NDFIP2 DUX4L45 ZSWIM6 MYL1 ANKRD36BP2 MTREX CAMK1G DSG1 C1orf87 LINC02327 FAM30A PDZPH1P ERICH3 TRERF1 CENPBD1P1 GID8 TADA2A RPL15P2 LRRC9 LINC00158 FBN1 NIPAL2 MTUS1 GABRA6 PTPRVP DHRS3 PANTR1 LASP1 VPS35L ABHD17C KRT6A C21orf91-OT1 GGT4P DROSHA ZNF813 ANKRD31 PALS2 ADCY10 FAM149B1 PDE1A TMPRSS2 LINC02165 PRICKLE2 CMAHP ANGPT1 TRIM58 HMGA2 HHAT KLHL32 CHASERR PSTPIP2 LINC00861 MVB12B C4orf50 LINC02253 UBASH3A CACNA2D3 SEL1L ELOC CUL1 SLC7A2 TMEM67 BTF3L4 MIR3936HG ZNF618 ITGA4 CPA6 AGO1 NSUN2 PRKCE DEFA3 GLYATL1 RBPJP5 PTPRK MIR3142HG CNTN3 GLIS1 ODAD2 ARHGAP31 RXRG ETNPPL KIR2DS4 PRKAA2 CD163 ARMC3 BBS2 SYT1 LINC01128 GRB10 OR4F15 LATS2 IKZF2 PPP1R12B APCDD1L-DT PDE2A DNMT3L ASPM RFC2 PPARA PLXNA2 KLHL33 DENND2C LINC01602 TBC1D13 CDYL2 SCARA5 PRG4 SCGB1D1 MLLT1 RANBP3L MARK2P12 </p> |
|--|----------------------------------------------------------------------------------------------------------------------------------------------------------------------------------------------------------------------------------------------------------------------------------------------------------------------------------------------------------------------------------------------------------------------------------------------------------------------------------------------------------------------------------------------------------------------------------------------------------------------------------------------------------------------------------------------------------------------------------------------------------------------------------------------------------------------------------------------------------------------------------------------------------------------------------------------------------------------------------------------------------------------------------------------------------------------------------------------------------------------------------------------------------------------------------------------------------------------------------------------------------------------------------------------------------------------------------------------------------------------------------------------------------------------------------------------------------------------------------------------------------------------------------------------------------------------------------------------------------------------------------------------------------------------------------------------------------------------------------------------------------------------------------------------------------------------------------------------------------------------------------------------------------------------------------------------------------------------------------------------------------------------------------------------------------------------------------------------------------------------------------------------------------------------------------------------------------------------------------------------------------------------------------------------------------------------------------------------------------------------------------------------------------------------------------------------------------------------------------------------------------------------------------------------------------------------------------------------------------------------------------------------------------------------------------------------------------------------------------------------------------------------------------------------------------------------------------------------------------------------------------------------------------------------------------------------------------------------------------------------------------------------------------------------------------------------------------------------------------------------------------------------------------------------------------------------------------------------------------------------------------------------------------------------------------------------------------------------------------------------------------------------------------------------------------------------------------------------------------------------------------------------------------------------------------------------------------------------------------------------------------------------------------------------------------------------------------------------------------------------------------------------------------------------------------------------------------------------------------------------------------------------------------------------------------------------------------------------------------------------------------------------------------------------------------------------------------------------------------------------------------------------------------------------------------------------------------------------------------------------------------------------------------------------------------------------------------------------------------------------------------|

|                   |      |                                                                                                                                                                                                                                                                                                                                                                                                                                                                                                                                                                                                                                                                                                                                                                                                                                                                                                                                                                                                                                                                                                                                                                                                                                                                                                                                                                                                                                                                                                                                                                                                                                                                                                                                                                                                                                                                                                                                                                                                                                                                                                                                                                                                                                                                                                                                                                                                                                                                                                                |
|-------------------|------|----------------------------------------------------------------------------------------------------------------------------------------------------------------------------------------------------------------------------------------------------------------------------------------------------------------------------------------------------------------------------------------------------------------------------------------------------------------------------------------------------------------------------------------------------------------------------------------------------------------------------------------------------------------------------------------------------------------------------------------------------------------------------------------------------------------------------------------------------------------------------------------------------------------------------------------------------------------------------------------------------------------------------------------------------------------------------------------------------------------------------------------------------------------------------------------------------------------------------------------------------------------------------------------------------------------------------------------------------------------------------------------------------------------------------------------------------------------------------------------------------------------------------------------------------------------------------------------------------------------------------------------------------------------------------------------------------------------------------------------------------------------------------------------------------------------------------------------------------------------------------------------------------------------------------------------------------------------------------------------------------------------------------------------------------------------------------------------------------------------------------------------------------------------------------------------------------------------------------------------------------------------------------------------------------------------------------------------------------------------------------------------------------------------------------------------------------------------------------------------------------------------|
|                   |      | <p> TG ADGRB3 HGD SLC36A1 PLCB1 UBE2R2 KCNH8 ATP6V0CP3 SDCBP ANKRD19P<br/> RPS10P7 CUL5 HOMER2 DGKI RIN3 LINC01221 REG4 LINC01151 DIP2B CD5L<br/> LINC01524 TBC1D30 IGLV2-14 NME7 STXBP6 TFDPI1 FAM66E ZBTB33 MXII<br/> ZNF876P PPME1 TRAPPC8 OR4R3P MBNL1 STX12 ABII LINC02291 FUT9 MOK<br/> CREG1 LINC02488 SLC12A1 SCN2A MAPKAPK5P1 WNT7A TUBB6 ZNF449 DOCK10<br/> FAM27C MED1 PAMR1 DDX6 HNRNPM SPIRE1 TMEM71 COG5 AIMP1 UBE2E1<br/> ARAP2 LDB2 LINC02149 SNX30 ATP8A1 BCL2L1 IQSEC1 LINC02008 JARID2<br/> LINC02236 SHROOM3 ADK PRR5L ALX4 CORIN MACROH2A1 FAM241A LINC00838<br/> RANBP17 WNT2B MRPS27 PPM1L CPHL1P LRRC37A3 TRIM43CP PRPF18 SMOC1<br/> GSTA3 EXD3 SETDB2 FAH MON2 OR51E1 TOGARAM1 SLC45A4 ZNF705B ELF2<br/> SEMA3D LDLRAD3 GLYAT KIF15 JPT2 CFTR VSX1 TBX20 FLRT2 NFATC2 MSH2<br/> NALCN-AS1 PRAMEF25 KRTAP20-4 ARHGAP44 MTMR2 ZNF970P KCNH5 FAM189A2<br/> BAZ1A CADM1 KLHL29 PTPRO ARID3B OPRM1 ACER2 ZDHHC14 RGS9 YLPM1<br/> ITFG1 IPO11 VCL SLC13A5 GLB1L3 ABCA9-AS1 DOCK5 VCAM1 C7orf31 LINC02511<br/> LINC01818 ATP6V1C2 EWSR1 MAGEL2 IFT81 NHSL1 OSCP1 SGO1-AS1 DTHD1<br/> SRGAP3 IGHV8II-13-1 HAAO CTNNAL1 CIBAR1-DT CYP2A7P1 ATP6V0D2 SYNJ1<br/> PHF20L1 KLF15 PPP2R2B NEDD9 HDHD5 IL12A-AS1 ANKRD66 ENPP1 SDR42E2<br/> LYRM4 CCDC150 DNM1P47 LINC02099 HEMGN RIMS2 UGP2 RP1L1 PPM1F OR4K8P<br/> EFCAB6-AS1 CHSY3 YBX3 YAP1 ARL15 ANK3 BMPR1B LINC01173 FCRLA LINC01937<br/> SEMA5A C1orf127 PRDM15 KITLG KRT6B SV2C ELL2 DAW1 ALE5A1 IGHV3-74 IFT57<br/> LINC01426 RIPOR2 MAP4K4 LINC02899 ZNF112 FICD FEZ2 COLE1 PEG10 INHBA-AS1<br/> PRAME HSPD1P3 NUP43 NMD3 OLA1 GATAD2B VPS13C ANKRD55 XIRP2 KRT85<br/> SLC14A1 CA1 C5orf52 FAM72C MFSD9 EOGT SERPINI2 STK38 APBB1IP NPL CAST<br/> TBC1D9 FBXO32 AOA1 SNHG14 TSBP1-AS1 SMG1P4 SNAI2 ZBTB49 ANP32B<br/> FAM90A28P PHF2P2 AP4E1 DLEU1 NDFIP1 TNR FAM180A LHX9 LINC02074 OCA2<br/> ST8SIA6 DAPK1 MSANTD2 FCHO2 RFTN2 TRAV8-6 COL6A6 RN7SL767P DNAH5<br/> CNTN6 CLIC6 LINC02406 FMN2 BHLHE40-AS1 SEMA3C VAV1 LINC00895 CACNA1I<br/> BTG3 DPY19L1 CSF2RB RPS6KA3 SMAD5 DNAJC13 BCKDHB PPIL6 IGLV3-30 CNST<br/> PATL1 UBE2J2 ASB2 OTOP1 PSME3IP1 OR4F6 GHRH UGT3A2 GOLGA8B RNLS<br/> IGLV4-3 SPOCK1 LINC02315 NF1P6 </p>                                                                                                                                                                                                                                                                                                         |
| 4C-decreased-1200 | 1146 | <p> LRRC37A5P CCDC116 ZHX3 APOL2 RPS4XP6 PDCL3 PTPRR HERPUD2 CRTAM<br/> SLC52A1 UBE2G1 PELI2 TPI1P1 NOS2 IGF2BP3 MIR548H4 ZEB1 LINC01708 FAT4<br/> PARN SEMA4D SLC15A2 MRPL45 RN7SL483P WSCD1 MIR4435-2HG KNDC1<br/> LINC02355 ZFYVE1 EVC HERC2P2 LINC00670 DMC1 CXADR C9orf43 NBPF21P<br/> OR7E19P RIOK1 HERC2 GGT2 UNC45B LUZP1 LINC01346 BVES-AS1 ZNF723<br/> LINC01138 CECR2 LINC01782 GNAS NPM1P2 CD38 SERPINB9 LINC01876 PGBD5<br/> LAIR1 MSH6 RASGRF1 HECTD2 FBXO31 C12orf40 LINC01163 GMPR RIN2 PRDM16<br/> PDE6C TRAPPC9 LINC00323 MEIS2 CARMIL1 PCDH7 BCL2 KL LRRC4C LINC02558<br/> RACGAP1 MIR3667HG THADA NUP37 PPP1R9A SAA3P TMEM117 KCNK15-AS1 TOX3<br/> TDRD5 TASP1 SNX6 POTE6 GOLGA6L3 SAMM50 ZZEF1 HHLA2 NCF4-AS1 C3orf52<br/> SLAMF1 UQCC1 RGL1 ATP5PBP3 SHOC1 LINC00841 FAAP24 INO80D KDM6A<br/> MED27 NCAM1 PDYN-AS1 GDAP1L1 LINC02096 LINC01358 EPHA4 LINC01967<br/> PLA2R1 LYSMD2 NGDN H1-9P ADAMTS2 GTSF1L WARS2-AS1 CCDC172 FRYL<br/> LINC01828 GPRC5C COLCA1 CPAMD8 RNU6-929P GPR1-AS UBL7 ARMC6<br/> LINC02675 ASH1L CALM1P2 RBM6 MEGF10 IGHV2-70D HS1BP3 LIPI LINC01445<br/> GOT2 RAB38 DZANK1 CLTCL1 NUA1 PCAT1 KCNK10 ZNF738 BLOC1S5-TXNDC5<br/> BRD4 SLC16A1-AS1 VMP1 CHAF1A NENF HRH2 ATP6AP1L RNU2-47P RDX SNTG2<br/> SVIL APBA2 TTC3 CHAMP1 COL23A1 NSD1 NEDD4L EDAR C5 EGF LINC00960<br/> ATP2B2 RPL37P3 CCNYL3 AGO2 ABCC12 PARK7 RIMBP2 ZNF271P IFT43<br/> ADAMTS19-AS1 SNRPC C2orf69P4 DRC7 DSE POTEJ LINC01427 MYCL LINC02256<br/> TPTE2 SPAG6 BMP7 PDE4DIPP1 GALNT2 KIAA0753 FGF12 ANKRD17 EPHX4<br/> CYP2C9 CNOT7 CASC9 IMPACT ITGA6 HHIPL1 NOTCH2 ZFP90 S100B ARHGAP12<br/> USP43 KCNN3 FKBP5 NFAT5 FLI1 ANAPC1 GRM1 IBA57 LINC02147 ARHGAP26<br/> ITGB8 GAP43 LINC02422 OR4K3 PRDM13 PDE3A PTPN4 BCAR3 MAP6 SREBF2<br/> CDH11 SETBP1 CDS2 ZNF780B LINC01900 ATP6V1E1 LINC01993 LMX1A AGBL1<br/> DEFT1P2 LINC02439 ZFAND6 GBP4 CNKSR2 PSMA5 RESF1 MAPK11P1L DPH6-DT<br/> GFRA2 NEK10 ADCYAP1R1 SNX29 MAGI2-AS3 ZNF611 STAT1 SAMD5 ZC3H14<br/> MROH5 SLC44A3-AS1 MYOCD CREM GOLGA8J XKR3 UBE2QL1 PLPPR5 TDP1 AVL9<br/> EFEMP1 TNRC6B WBP2P1 ZNF33B LINC02542 SYN2 PTCD2 MYO1E SMOC2 MIPEP<br/> NCSTNP1 HDAC2-AS2 HLCS FH RWDD2B PLPP4 PWRN4 CCDC102B SDS GSR<br/> LINC01571 FIG4 SOGA1 ARHGAP32 NECTIN1 ZNF528 LINC01222 LALBA NXN<br/> LINC00375 FOXJ3 CENPE CKMT1B MYL12B RSPH14 IL17RD BRCA2 ANKMY1 HCG22<br/> APELA UBN1 SSBP3 PLA2G12B FAM83B HDAC4 CTNNA1 STK36 GNAI2P1 FAM102A<br/> NCORIP1 TRPC5 MYO9A TMEM182 IL10 LINC02305 LCLAT1 LIFR-AS1 C19orf18 FTO </p> |



|  |                                                                                                                                                                                                                                                                                                                                                                                                                                                                                                                                                                                                                                                                                                                                                                                                                                                                                                                                                                                                                                                                                                                                                                                                                                                                                                                                                                                                                                                                                                                                                                                                                                                                                                                                                                                                                                                                                                                                                                                                                                                                                                                                                                                                                                                                                                                                                                                                                                                                                                                                                                                                                                                                                                                                                                                                                                                                                                                                                                                                                                                                                                                                                                                                                                                                                                                                                                                                                                                                                                                                                                                                                                                                                                                                                                                                                                                                                                                                                                                                                                                                                                                                                                                                                                                                                                                                                                                                                                                                                                                                                                                                                                                                                                                                                                    |
|--|--------------------------------------------------------------------------------------------------------------------------------------------------------------------------------------------------------------------------------------------------------------------------------------------------------------------------------------------------------------------------------------------------------------------------------------------------------------------------------------------------------------------------------------------------------------------------------------------------------------------------------------------------------------------------------------------------------------------------------------------------------------------------------------------------------------------------------------------------------------------------------------------------------------------------------------------------------------------------------------------------------------------------------------------------------------------------------------------------------------------------------------------------------------------------------------------------------------------------------------------------------------------------------------------------------------------------------------------------------------------------------------------------------------------------------------------------------------------------------------------------------------------------------------------------------------------------------------------------------------------------------------------------------------------------------------------------------------------------------------------------------------------------------------------------------------------------------------------------------------------------------------------------------------------------------------------------------------------------------------------------------------------------------------------------------------------------------------------------------------------------------------------------------------------------------------------------------------------------------------------------------------------------------------------------------------------------------------------------------------------------------------------------------------------------------------------------------------------------------------------------------------------------------------------------------------------------------------------------------------------------------------------------------------------------------------------------------------------------------------------------------------------------------------------------------------------------------------------------------------------------------------------------------------------------------------------------------------------------------------------------------------------------------------------------------------------------------------------------------------------------------------------------------------------------------------------------------------------------------------------------------------------------------------------------------------------------------------------------------------------------------------------------------------------------------------------------------------------------------------------------------------------------------------------------------------------------------------------------------------------------------------------------------------------------------------------------------------------------------------------------------------------------------------------------------------------------------------------------------------------------------------------------------------------------------------------------------------------------------------------------------------------------------------------------------------------------------------------------------------------------------------------------------------------------------------------------------------------------------------------------------------------------------------------------------------------------------------------------------------------------------------------------------------------------------------------------------------------------------------------------------------------------------------------------------------------------------------------------------------------------------------------------------------------------------------------------------------------------------------------------------------------|
|  | <p> SLC6A1 EPC2 SEM1 SEMA6A-AS2 MOGAT3 MS4A4A TMEM236 NLK THSD7A CXCL2<br/> GOLGA6B LINC00334 CARD10 ACSBG1 GCSAML DNPEP TRAPPC11 HOXC4 IGHV3-<br/> 62 NECTIN4 CNMD LINC01309 UFD1 SMARCA4 LINC00299 BAZ2B HERC2P3 CRACD<br/> NGF-AS1 AGL PALMD HS6ST1 MARK2 MEOX2 SF11 ZBED9 CTSE ATF2 PLEKHB2<br/> FAIM ZNF72P RPRD1A ZNF880 PPP2R2A ESS2 PHAF1 ZNF541 RBBP8 AK6P2<br/> CKMT1A RFC1 NSUN6 LINC02174 CDC45 MC2R AKR1B1 BTBD11 CWC22 LRP2<br/> LINC02087 ZNF121 HERC2P9 SYNE1 MTHFD1L RALGPS2 HOATZ SNRK ABCD1P4<br/> EXTL3 EHMT1 TTC29 FBXO47 KRT89P ZNF735 ZBTB10 PKHD1L1 SLC9B1P4 PLPPR1<br/> CEP192 SLC26A2 CAMK4 GUSBP11 CLPX OR7H1P ROCR ANKRD20A9P HDAC11<br/> SLC9A4 DHX29 ANKRD20A17P GRIK3 GRXCR1 NUMB STPG2 MIDEAS TM9SF2 CD70<br/> SH2D1B ZNF606 ESYT2 HEATR6 ARFGAP3 MAPRE2 FGF10 TAPT1-AS1 KRT18P59 ISX<br/> RAD51AP1 POTEM LINC01035 ESRP1 RIC8B TAF3 ZMYM4 TPTE FRG1JP MED12L<br/> GRM7 ZDHHC21 BRMS1L TM9SF3 DDHD1 ICA1 PLEKHD1 CDH7 TLDC2 CYCSP39<br/> HORMAD2-AS1 VASP PLGRKT UBE2E2 UNC80 SDE2 PTGFRN PPA2 ILDR2 IMMP2L<br/> ZNF615 SPSB4 SPSB1 GABRG2 ZNF567 ITCH NUDCD3 MBP S100BPB TANGO6<br/> GABRA5 CDKN2C CFAP97 STXBP1 SLC46A3 DLC1 ANKRD33B PNPLA7 RPS3AP4<br/> CNIH1 FRG1BP C2orf69P3 LINC00114 ZIM3 MANBA DUX4L2 CHRM3 ECT2L UST<br/> MIR663AHG CALD1 LINC01543 ERICH1 DEDD2 TYW1 TAF15 ALB ARHGAP24 JPH1<br/> ANKRD20A3P EFR3A HTR2A UBAP2 TPH2 N4BP2L1 IGHV1OR15-9 TPTE2P6 EIF4BP3<br/> LOXHD1 APC MDS2 GOLGA8G LINC01622 GALNT1 MARCHF1 OR4L1 ZBTB25 INO80<br/> RBM15-AS1 HSD17B14 KRT16P6 COL27A1 GLP2R CHCHD2 BMP5 SLC4A4 ZNF675<br/> LINC02366 GOLGA6L17P SYT16 CRYBG1 TWIST1 HACD2 LINC02653 LINC02061<br/> GEMIN5 RPL15P3 TRIM77BP KTN1 ERCC6L2 PASK RUFY2 SLC16A1 RANBP9<br/> FAM245A MRTFB LINC01344 KCNE4 TRIM5 LINC02228 KRTAP21-3 LINC01801<br/> LINC01320 LYPLAL1 THNSL2 BRWD1 COLQ PPIP5K1 C9 TMTC2 HECW1 HMGB1<br/> MEF2C MCTP1 RNU1-51P MOB3B ACTR3C LCE1F ARPC3P2 MAP4 TSPAN11<br/> MTND1P17 HIVEP1 ATRX TNIK KRT18P55 OR1L6 NBN PRTG OR2T7 SLC17A1 RGM<br/> B KMT2E WNK2 FRMD3 SETD2 RBFOX3 MRPS35 SDAD1P2 PWWP3A ITIH5 UTP4<br/> PACSIN2 TRGJ1 HOXC13 PKP1 SMARCC1 SYNE2 GTF2IP6 MIR181A1HG TRMT61B<br/> NUP214 TRIM23 FABP7 SDCCAG8 GK LINC00355 DUSP22 KCNJ18 ECPAS CHSY1<br/> RFC3 MAB21L3 SFPQ SMPD4 URB1 PTPN12 GPR137B ZYG11A LINC00434<br/> LINC02424 TOP3B MPPE1 STAG2 RGS3 UBA6-DT ANKRD26P1 CMIP DEFB116<br/> SLC2A13 FBN2 YTHDF3 SPATA17 SYT10 ZBTB38 PAFAH1B1 LINC02380 CYFIP1 ALK<br/> DOCK8 GON4L GREB1 ARNT LINC01340 LINC00929 CSTF3 ZNF648 LINC02058<br/> SAMD13 DNAH6 ARFGEF3 TMC05A UHRF2 EPCAM-DT CSDE1 DLC1 DEFT1P<br/> RNF215 ANKRD28 GRK3 ZBTB2 SND1 IFNG-AS1 SNAP25-AS1 ZFAND4 LINC01664<br/> FGD4 EFTUD2 NRIP1 ETS2 LINC00649 ZNF382 NDUFAF6 GOLGA6D ERMP1<br/> CATSPERG ARL4C ITS2 LINC01917 KTN1-AS1 HIRA OSER1-DT SERPINB7 ANKS6<br/> TMEM74 PRKAA1 RASGEF1C TFAA4 ALDH1A2 GABRG1 MTTT POGK CROT MAPK9<br/> ESRRG FBXW2 STON2 LINC02458 LINC02652 LINC01229 FOXJ2 AGAP9 ABCC4 MYT1<br/> FRG1HP ABCD2 DNAJC7 ZNF595 EMP1 TMEM171 ZC3HAV1 LNCAROD RRAS2 SV2B<br/> FAM110A NRBP1 SEC14L3 STK38L GTF2F2 RALGAPA2 FAM245B ADAMTS19 ZNF236<br/> RAB27B SOX30 LINC01337 MYOF CPSF3 PLS1 UNC79 RSPH1 SPON1 ANK2 SH3GL3<br/> CFHR4 INVS FHL2 SNRPD1 NCPAG2 LPCAT2 SUMO3 LNP1 BZW1 PCNA TPTE2P5<br/> PHF19 ZNF518A LINC02191 IGLV3-31 DCAF1 ZCCHC7 CD2AP TTC39C LINC02680<br/> ZNF124 EBF3 TFAA5 NFKBID SPRED1 MYO5A CIDEA LINC01924 PPP2R2C PWRN1<br/> LINGO1 LINC01706 SEPTIN9 SMPDL3A LRFN2 ACO1 WDFY4 SCAI PAPP2 LTN1<br/> TINAG NCOR1P3 DIRAS2 AQR ABCB5 HEATR4 SLC5A9 KLHL4 DPY19L2 MDM1<br/> RRBP1 SMPX OVOL2 CD9 MTMR10 EIF3F CDHR3 CSE1L NEK2P2 TOM1 FAM118A<br/> PRUNE2 SGMS1 ANKRD24 COL25A1 RBPMS2 CYP4A11 BRINP1 IGLV2-34 MTND2P8<br/> RPL23AP7 GRB14 LARP6 IGSF5 LONP2 CCDC192 LEMD3 PEX6 CHKA BUB1 RNF138<br/> INTS4P1 KRTAP21-2 ZNF292 SPIN1 TBX15 PRB3 TTC3P1 KPNA1 SKA1 LAMC1 SRP9<br/> SCGB2B2 GABPA SMIM11B DSG1-AS1 PCNX1 DUXAP10 LINC02091 NAA35 ATP5PF<br/> RPF2 UBAP1L ZCCHC14 MX2 AGGF1P10 MTCO1P1 ITGB3BP ZNF831 PRAMEF2<br/> ENTPD5 DGKK SLC4A10 LINC00844 TSSC2 LIX1-AS1 TGM1 AGAP14P MGAM FTLP13<br/> ZDHHC18 LINC01310 PSG9 FAM183A UHRF1BP1L IL1RAPL2 APIP MUC19 SCAPER<br/> ADSS2 IKBIP NPHP4 LINC02141 OR8B9P CBLIF ATP6V1B2 KCNJ1 LRRTM4 CLCA4<br/> LINC01877 MYOM2 SLC5A12 NCS1 ONECUT1 PCDH11Y LINC00923 METAP1D USP31<br/> SUMO2 OR5AQ1P MICOS10 XPNPEP1 GLYATL3 NUBPL PCGF5 FGF7P1 NLRC5<br/> TUBBP9 LINC00363 NDUFAF2 GUCY1A2 KREMEN1 UMODL1 LINC01189 MB<br/> LINC00383 WDR25 SOD1P2 CYP4Z1 MGA LCE3D TNPO3 EFHB ACSM2A FGF9<br/> DCUN1D4 DAZL NIN RPL23AP53 SLC1A1 HPCAL1 SPG21 ANKFY1 LIMCH1 ZKSCAN5<br/> CCDC195 TSHZ3 TMC04 LINC02098 RALA GMDS-DT BAZ2A MIR548A1HG RPS12<br/> GNPTAB TRPM1 NTN1 COPS8 SACM1L AKAP9 C1QTNF3-AMACR PPIL2 AP4S1 </p> |
|--|--------------------------------------------------------------------------------------------------------------------------------------------------------------------------------------------------------------------------------------------------------------------------------------------------------------------------------------------------------------------------------------------------------------------------------------------------------------------------------------------------------------------------------------------------------------------------------------------------------------------------------------------------------------------------------------------------------------------------------------------------------------------------------------------------------------------------------------------------------------------------------------------------------------------------------------------------------------------------------------------------------------------------------------------------------------------------------------------------------------------------------------------------------------------------------------------------------------------------------------------------------------------------------------------------------------------------------------------------------------------------------------------------------------------------------------------------------------------------------------------------------------------------------------------------------------------------------------------------------------------------------------------------------------------------------------------------------------------------------------------------------------------------------------------------------------------------------------------------------------------------------------------------------------------------------------------------------------------------------------------------------------------------------------------------------------------------------------------------------------------------------------------------------------------------------------------------------------------------------------------------------------------------------------------------------------------------------------------------------------------------------------------------------------------------------------------------------------------------------------------------------------------------------------------------------------------------------------------------------------------------------------------------------------------------------------------------------------------------------------------------------------------------------------------------------------------------------------------------------------------------------------------------------------------------------------------------------------------------------------------------------------------------------------------------------------------------------------------------------------------------------------------------------------------------------------------------------------------------------------------------------------------------------------------------------------------------------------------------------------------------------------------------------------------------------------------------------------------------------------------------------------------------------------------------------------------------------------------------------------------------------------------------------------------------------------------------------------------------------------------------------------------------------------------------------------------------------------------------------------------------------------------------------------------------------------------------------------------------------------------------------------------------------------------------------------------------------------------------------------------------------------------------------------------------------------------------------------------------------------------------------------------------------------------------------------------------------------------------------------------------------------------------------------------------------------------------------------------------------------------------------------------------------------------------------------------------------------------------------------------------------------------------------------------------------------------------------------------------------------------------------------------|



|                        |      |                                                                                                                                                                                                                                                                                                                                                                                                                                                                                                                                                                                                                                                                                                                                                                                                                                                                                                                                                                                                                                                                                                                                                                                                                                                                                                                                                                                                                                                                                                                                                                                                                                                                                                                                                                                                                                                                                                                                                                                                                                                                                                                                                                                                                                                                                                                                                                                                                                                                                                                                                                                                                                                                                                                                                                                                                           |
|------------------------|------|---------------------------------------------------------------------------------------------------------------------------------------------------------------------------------------------------------------------------------------------------------------------------------------------------------------------------------------------------------------------------------------------------------------------------------------------------------------------------------------------------------------------------------------------------------------------------------------------------------------------------------------------------------------------------------------------------------------------------------------------------------------------------------------------------------------------------------------------------------------------------------------------------------------------------------------------------------------------------------------------------------------------------------------------------------------------------------------------------------------------------------------------------------------------------------------------------------------------------------------------------------------------------------------------------------------------------------------------------------------------------------------------------------------------------------------------------------------------------------------------------------------------------------------------------------------------------------------------------------------------------------------------------------------------------------------------------------------------------------------------------------------------------------------------------------------------------------------------------------------------------------------------------------------------------------------------------------------------------------------------------------------------------------------------------------------------------------------------------------------------------------------------------------------------------------------------------------------------------------------------------------------------------------------------------------------------------------------------------------------------------------------------------------------------------------------------------------------------------------------------------------------------------------------------------------------------------------------------------------------------------------------------------------------------------------------------------------------------------------------------------------------------------------------------------------------------------|
|                        |      | <p>NR5A2 PRKD1 SPTB TRAV8-1 TNFAIP8 RBM47 TMEM260 GBP6 SANBR DBF4B OR9Q1 CCL28 FBXO41 MICAL3 SNRPN HDAC2 MSI2 MRTFA LRRC7 LINC00221 ETS1 TNN UBAP2L CASZ1 PCDH8 LINC01673 WDHD1 MIR155HG MAMDC2-AS1 RABEP1 ST6GAL2 LINC00930 NUTM2HP SLX4IP PTCHD4 BANP ALKAL2 MAP2 YME1L1P1 TGFA ZFYVE26 SNX3 LINC01422 ZNF280B PTPRA CEACAM7 TNRC6C TMEM161A DEFB108B OR11G2 LINC02451 WSCD2 UBE3D GLIDR ZNF402P CERS3-AS1 RPL23AP87 GOLGA6C ABCA4 ZFAND3 LINC01718 THUMP2 C6orf118 FAM83F CNKSR1 RAB12 TMEM163 PCDH9 LINC02235 SLF1 EXOC1L BACH1 RBMS3 POTEH GNA14 OXNAD1 INMT-MINDY4 LINC01992 SRFBP1 MATN2 TM7SF3 IL33 EFCAB2 MARK4 CRACR2A CLEC16A LINC01901 OR2T3 SERPINB10 PROX1-AS1 ACTN1-DT ARHGEF17 ME3 PSG6 ZNF431 CACYBP ITGA9 PPP1R1C ULK2 IARS2 UNC13C CDC42BPB HNRNPH3P1 TMEM44-AS1 LINC00298 FAM217B MTRF1 FAM25G SHROOM2 OVCH1 CISD1 C16orf95 CRTAC1 PRKAB1 RALGAP1 LMX1B LINC01748 L3MBTL3 RRAGD IGKV2OR22-3 POMT2 MICALL2 ST13 LINC02245 CLIP1 MARCHF8 SHC4 C2orf42 CABLES1 MORC2 ZNF613 TLL1 DEFA8P FRMD6-AS2 DUSP16 BCL11A AKR1C3 PPP2R5E ASB7 FREM1 IL20RB ADAM22 RABL2A LINC02582 LINC01811 CNIH3 RPF1 TRIT1 TBCD CEPT1 WNT5B KCNK5 CEP44 HKDC1 CLNS1A EPS15L1 PVT1 CHN1 ETV6 WNT9B RFX7 TRPS1 SERBP1 SKINT1L IGKV3OR22-2 RANBP2 ADAMTS5 NF2 STRN CRISPLD2 NPM1P1 ANTXRPL1 MTMR3 ZNF845 RN7SL250P FAM25C CRKL ITPRIP H2BC15 ADGRA3 SCG5 CLDN18 LINC00581 ADCY9 DPP10 TUBB2BP1 GALNT16 CDH5 ANO6 ZNF600 HIPK1 A2MP1 PGPEP1 ACSM2B TTC7B PEPD ATP2B1 IFI44 RETREG1 NLRP14 PCNT NPHP3-AS1 PAH FAM138E ATRN FBLN5 CNOT6L TRAPPC6B TOP1 ZNHIT6 SLC39A6 WDSUB1 ANKRD20A7P</p>                                                                                                                                                                                                                                                                                                                                                                                                                                                                                                                                                                                                                                                                                                                                                                                                                                                                                                                                                                                                                                                                                                                                                                                                                                           |
| downregulated-11470,05 | 1031 | <p>GRAP2 ITGA5 BTG2 CYP26A1 RTKN2 IGF1 LMAN1 NTRK1 UBAC1 GDF15 ASNSP1 TRIB3 REEP6 CCDC88B LINC02864 STK16 XK HEPH BBC3 CASTOR2 PCOLCE TSC22D1 LHFPL2 EPS8 ITM2B UTRN TRIQK ACSBG2 SNX16 GPC5 GTPBP1 PDIA3 CA11 ALDOC NECTIN2 ZNF83 SEL1L3 ZCRB1 GDPD5 ENSG00000213963 OXLD1 DDB2 ANO5 LINC02267 LTBP4 TSPAN13 STARD5 MT-ND4L VWA5A NAT8L TNFRSF9 ENSG00000224271 GTF3C3 DMTN AP3M2 LINC00656 CORO2A APOE C3 KLHL36 BTN3A1 DNM1 HYOU1 SLC16A5 KBTBD3 SORT1 LLGL2 NFKB2 PGGHG MYO15B IFT140 GMPPA MLF1 SLC6A6 DUSP5 ID1 COL18A1 ELAPOR2 A4GALT BCAM PCK2 ADAM19 THRB MMP15 ZBTB11 EXOC2 GUCA1B LSM4 POMT1 NUCB1 TLCD2 DDHD2 RYR1 NUDT12 ZNF467 MAN2B1 FGFR3 HES7 EPHA1-AS1 TKTL1 TM6SF1 TFAP2B AKNA NBR1 PKHD1 INPP5J FAM234A SELENOP UBE2L6 TMED9 MYORG TDRKH TLE2 LONRF2 GIPR AHCYL1 STON1 YIPF2 FN1 RBPM5 PTPRH SHFL GGA1 DGKD SERTAD2 CYSTM1 IGSF8 ZNF275 ACAD11 GAA ENTR1 ACSF2 BTK TJP3 CLCA1 AURKB HID1 ZC3H6 GABBR1 PAX8-AS1 DEF8 MANF PLA2G6 CCDC113 PRR36 CEBPD GPR158 CALR4P WARS1 ADCY3 TMEM241 PHYKPL GRHL1 LARGE2 WDR91 HAGH TMED7 YPEL5 ITGB1 PI15 TAB2 CPD BRSK1 PECR KRT8 SYDE2 UCA1 SVIP PCAT14 TMRSS4 GABPB1-AS1 ACADVL ISCU GLI1 HBP1 PHGDH MCFD2 EPS15 IL13RA1 SH3BGL2 ENO2 B2M ADAMTSL4 EHD2 MAP1A AGER SAT2 SNTA1 TCFL5 CLIP2 WNK4 VPS16 C1GALT1 CD93 KDM6B RRAS PCDH15 PCED1A PPDPF TMEM106C BAIAP3 IL15RA H1-10 SCFD1 ZKSCAN1 RABAC1 ADGRE2 ESRRB EPSTI1 BSDC1 POFUT2 RASGEF1A CTCFL XYLT2 TMEM263 BCL6 TPD52L1 PROS1 FGFR4 CRAT NYAP1 VEGFA PIK3CD DMBX1 TGFB1 ABHD18 PSEN2 CHST2 SNHG32 NTS ULBP1 PIGK ZDHHC8P1 PLOD2 KLF9 RPL27 LAMA3 SLC30A2 KIF1B GPD1L B4GALT4 PSRC1 ALAS1 PDK4 SMIM1 ENSG00000286403 CPZ PTTG1 LINC02416 ZSWIM4 TARBP1 BLVRB GTPBP2 ATP2A3 SMARCA1 PLXND1 SMURF2 ACER3 UCP2 ARHGAP8 RFK DNAJB11 CACNA2D2 SLC22A5 DOCK6 SLC25A42 FMNL1 PTPRC EEF1A2 FAM83A HEXD GPR155 RAB24 SPEG IQGAP3 SHC2 INPPL1 TMCO6 MAP3K14-AS1 GSEC RTCA-AS1 DCTN4 HNRNPCP4 CNN2 DBP PPP1R13L LRRC63 GFPT1 FCGR2A MC4R MAN1A1 STARD8 FNDC4 PCED1B OCEL1 MKNK2 BATF2 SLC29A4 NIBAN2 UXT-AS1 LINC02432 PALM PARP12 SLC22A23 C6orf89 LDLRAP1 TUBB2B SLC31A1 AFDN-DT IRAK2 MFGE8 SH3BP2 SH3TC2 AGRN RTN2 TSKU RHOT1P2 APBB3 GPSM1 GADD45A TMEM70 LRP1 SH3PXD2B MMP14 SERPINI1 PPP2R5B PTPRF NIPSNAP2 NDRG1 CPXM1 MRPL23-AS1 ERFE ABCB9 TRAK2 ENSG00000249631 LGALS3 PDLIM4 CLSTN3 NFE2L3 STAT5B ENSG00000253154 ENSG00000286488 SLC22A31 ARL6IP5 TMEM50B DBNDD1 C11orf80 SCN1B ACVR1 PLEKHH1 GOLGA2 F2R LPCAT4 THBS1 ACSL1 ASMTL CMAS AFDN UBE2H SLC6A8 PDE7A NFE2L1 GEMIN2 PAAF1 C2CD2L GSDMB GAL3ST4 FUCA1 MACC1 SOCS1 BHLHE40 KIAA0895 ROBO3 SLC17A6-DT LRSAM1 PLXNB2 INHBE NUP107 SLC25A36 RAB11FIP1 SDC3 NR2F6 ZNF396 CAMTA2 HIP1R PLEKHA2 ENO3 ZNF204P ENSG00000271382 STX10 TSPAN18 MCF2 MAN1B1 P4HA1 TMEM243 FECH LRRC20 ANKRD20A11P IL10RA VCAN PCYOX1L ARG2 FBXL16 GDE1 MAP4K2 LAMB2 PDIA6</p> |

|  |                                                                                                                                                                                                                                                                                                                                                                                                                                                                                                                                                                                                                                                                                                                                                                                                                                                                                                                                                                                                                                                                                                                                                                                                                                                                                                                                                                                                                                                                                                                                                                                                                                                                                                                                                                                                                                                                                                                                                                                                                                                                                                                                                                                                                                                                                                                                                                                                                                                                                                                                                                                                                                                                                                                                                                                                                                                                                                                                                                                                                                                                                                                                                                                                                                                                                                                                                                                                                                                                                                                                                                                                                                                                                                                                                                                                                                                                                                                                                                                                                                                                                                                                                                                                                                                                                                                                                                                                                                                                                                                                                                                                                                                                                                           |
|--|-----------------------------------------------------------------------------------------------------------------------------------------------------------------------------------------------------------------------------------------------------------------------------------------------------------------------------------------------------------------------------------------------------------------------------------------------------------------------------------------------------------------------------------------------------------------------------------------------------------------------------------------------------------------------------------------------------------------------------------------------------------------------------------------------------------------------------------------------------------------------------------------------------------------------------------------------------------------------------------------------------------------------------------------------------------------------------------------------------------------------------------------------------------------------------------------------------------------------------------------------------------------------------------------------------------------------------------------------------------------------------------------------------------------------------------------------------------------------------------------------------------------------------------------------------------------------------------------------------------------------------------------------------------------------------------------------------------------------------------------------------------------------------------------------------------------------------------------------------------------------------------------------------------------------------------------------------------------------------------------------------------------------------------------------------------------------------------------------------------------------------------------------------------------------------------------------------------------------------------------------------------------------------------------------------------------------------------------------------------------------------------------------------------------------------------------------------------------------------------------------------------------------------------------------------------------------------------------------------------------------------------------------------------------------------------------------------------------------------------------------------------------------------------------------------------------------------------------------------------------------------------------------------------------------------------------------------------------------------------------------------------------------------------------------------------------------------------------------------------------------------------------------------------------------------------------------------------------------------------------------------------------------------------------------------------------------------------------------------------------------------------------------------------------------------------------------------------------------------------------------------------------------------------------------------------------------------------------------------------------------------------------------------------------------------------------------------------------------------------------------------------------------------------------------------------------------------------------------------------------------------------------------------------------------------------------------------------------------------------------------------------------------------------------------------------------------------------------------------------------------------------------------------------------------------------------------------------------------------------------------------------------------------------------------------------------------------------------------------------------------------------------------------------------------------------------------------------------------------------------------------------------------------------------------------------------------------------------------------------------------------------------------------------------------------------------------------------|
|  | <p> TGFBF3 ZMYM2 DYNC2LI1 CDKN1A IL32 RPS6KA1 CUL7 FAM214B ERMN CCDC71L<br/> HRC LRG1 ENSG00000236393 GUK1 MAF ENSG00000229191 HOOK1 GTF2E2<br/> MAPK8IP3 CRYL1 PRKACA IFIH1 MVB12A IDH1 ZKSCAN8P1 ANO8 NUDT4 MICAL1<br/> SWI5 SEMA3F HAX1 NEK9 NHLH1 PIDD1 CD200R1 INPP4A PTPRU ATP8B3 ST6GAL1<br/> SIAE SKIL ALAS2 ST3GAL5 SDF2L1 KLF13 RNF11 DLK1 COL11A1 LTK YARS1 RAB18<br/> RPL29P14 AMPD2 PITPNC1 SEMA6B PLP1 MLLT11 LINC00663 ENGASE PYCR2<br/> KCNJ11 SEC24A IFITM1 GAS6 KRBA1 THUMPD3-AS1 MT2A MYO1D SFXN5 FLT4<br/> SESTD1 UBR5-DT RHOBTB1 LINC02384 CHPF SMAP2 CALCOCO1 MAP7D1 DEPP1<br/> COL1A2 DTNA AMIGO2 RELL2 PROCR ZNF697 EHHADH LAPTM4B ITGB5 C4orf46<br/> REEP2 ARFGAP1 SMAD6 RHBDD1 FAM171A2 PVR ZBED5 TMEM63A FNBP1<br/> PITPNM1 ANKZF1 DUSP8 MLXIP KHNYN RCN3 PRCP YIF1B WASL NFE2 ADD3<br/> PTEN MAST2 ANXA1 GTF2A1 ARVCF DENND11 ID3 NBEAL1 TIA1 HLTf POLI<br/> FAM234B GPR180 POLG2 PTK2B UNC5B LINC01419 MFSD6 CHID1 PTPDC1 USP20<br/> PPM1J CALB1 B4GALNT4 MDGA2 PKD1 CCDC50 RGS16 CRYZL1 SMIM3 TGM2<br/> TCAF1 LYRM1 NFATC4 FHIP2B PDLIM7 STX2 SLC44A2 COG6 CD55 ACAT1 AARS1<br/> SMAD3 ATF3 TRDN CARD11 APOL6 RTN4R SEPTIN6 OSTF1 CAMSAP3 TEX19 CTIF<br/> TBC1D5 SOCS2-AS1 LINC00173 THOC2 LGALS1 COL15A1 CASP10 NPAS1 DACT3<br/> MINK1 HLA-E BTN3A2 SYT5 SEMA3A R3HDM4 TRIM3 MGAT5 RTN3 ULK1 ZNF175<br/> TMEM143 MRAP2 MYO5B COPG1 CD36 ZNF117 CENPH TTYH3 ZNF692 IDH2 EFHD1<br/> COX6A1P2 PAX9 GALNT5 NIPSNAP1 TNNI3 RNF145 GDI1 TSC22D3 CCM2 ARID5B<br/> FLNC TMCC2 HACE1 NOTUM SPTAN1 ATP7A COLGALT2 ENSG00000283125 PAN2<br/> RAB26 DCLRE1B NDUFB4 BCL9L MAPT HSPA4L TTBK2 RNF103 CXCL8 KHK HDAC9<br/> WIPF3 LITAF NLGN2 DLG3 MSI1 CC2D1A ZCCHC24 PIM1 PCLO THBD SERINC2<br/> ADGRL1 HECW2 IARS1 TENM1 BNIP3 PRR14L CCNL2 CDC42SE1 CBLB MIIP AP2M1<br/> OAS3 ANXA6 TSPYL2 VBP1 MORF4L2 NEMP2 PRKAB2 MAP3K8 DLG4 STOM GSN<br/> ENSG00000264112 MAPRE3 RIMS3 ENSG00000286750 RHBDD2 LMOD1 PDGFB<br/> CALR RGL3 ITGAV RTN4RL2 ITPKA ANGEL1 BTBD2 RHAG PTK7 PHKA1 HELZ2<br/> ENSG00000255347 RAB6B DENND4B SLC25A29 ENSG00000204745 ENSG00000258274<br/> ROBO1 APAF1 TRPT1 TNK2 TBC1D20 KIF5A CCSAP ENSG00000287737 LINC01033<br/> RNF187 MRC2 AGPAT4 SFMBT2 ACVR1C SETD5 GALNT12 SALL2 ENSG00000279164<br/> SH3GLB2 SNX2 ABI3BP ATP1B2 SEMA7A GABARAPL1 ATM ODF2L KLF12 GTF2H4<br/> ARRB1 ITM2C NSD3 USP45 AHS2P LINC02863 MAN2A1 OBSCN PP1B RBL2 CD46<br/> ENSG00000286980 C4orf33 HJV RPH3AL GOS2 SLC447 PLEKHH2 SEC2B2 TTC7A<br/> SLC17A7 ENSG00000273901 MEIS3 MUC4 BRPF3-AS1 SLC35F3 ARRDC4 RAB31<br/> ENSG00000257086 ZBED8 ANKRD9 AZU1 LAMA5 SPATS2 KPNA5 KMT5C EHBP1<br/> ENSG00000257337 TXNIP NIM1K TMEM41B CXorf38 CORO6 EPHX2 LPAR2<br/> MARCHF2 FBXO44 FAM131A PSME1 CHAC1 MAST1 ZMYM1 MTATP6P1 ADGRA2<br/> LINC02772 ARHGEF40 ZNF558 TRPM4 ZP3 RNF213 ACSS2 PDIA5 KIAA0040 KCTD20<br/> FLNC-AS1 ACE CLDN12 TPD52 EML2 TUBE1 WDR31 SLC37A4 CREB3L2 WBP1L<br/> IVNSIABP OGT ABCG2 RHPN1 P4HA2 FUT1 SERGEF PTPRS COTL1 TMEM9 PEX2<br/> SESN3 WDR11 DAB2 MARCKS RBCK1 SERPINH1 SH2D3A ZDHHC8 VWDE CD59<br/> IL2RA CD24 NFASC DDIT4 BST2 ATP1A2 OPTN HERPUD1 SCPEP1<br/> ENSG00000285108 KLF7 DMKN DNASE2 LGMN MSH5 MYRF PYGL SNPH STARD10<br/> EPB41L2 SOX5 GOLM2 ETFDH PCSK4 ENSG00000225528 KCNAB2 CCDC18-AS1<br/> GALK2 MTURN TSPO RAB3B SEMA6C ERBB3 SERPINB1 TCAF2 GGT7 TUT7 CALU<br/> HSPA5 WIP1 DENND3 PAFAH2 TP53INP1 LDAF1 FADS3 VPS28 ULBP2 ANAPC16<br/> EPHX1 NCBP2 GPSM3 ENSG00000259953 ADGRL3 SIL1 MICAL2 CPNE3 CAPRN2<br/> TNFRSF1B LGALS9 RBM22 STK4 HMGCL FGFR1OP2 TRIM38 ENSG00000272941 CA2<br/> CTBS DCP2 FGD1 PIGS HSP90B1 ANKRD29 GTDC1 MXD3 NIT1 TNFRSF10B TCIRG1<br/> PAPSS1 SIDT2 GRN ACAD10 LINC01278 SMIM14 EDEM1 SEMA4G METTL25B<br/> RIPOR3 DZIP3 TTLL3 ERP44 ITM2A ETAA1 MTCL1 NRIP3 GPC2 PAIP2B ACBD4<br/> CDKN1C NIPA1 CLYBL CYP26B1 PRSS16 GNB5 C3orf18 EIF2AK1 RAVR2 SOCS2<br/> PLPPR2 BRWD3 CR2 IFNGR1 MIR223HG PLEKHH3 TMOD1 NT5C2 PDK1 PPP1R16B<br/> ALS2CL SLC45A3 MEG3 REEP4 AMOTL1 DRAP1 PLCD3 TMEM30A OGA MORN4<br/> SMPDL3B FAM227A SETD7 GSTO1 ACSL6 CORO7 RGS10 ZMIZ1 TKFC CCND2<br/> QSOX1 ANKIB1 ABCA7 PLD3 CUEDC1 ENSG00000237643 PLEKHA4 STARD9 HEMK1<br/> FDXR PAPLN NES CDCP1 RAB27A TXNRD3 CITED4 CUX1 UNC119 MALAT1 LRP4<br/> MLXIPL ELPI BCL3 HIVEP3 ITGB3 RUSC1-AS1 MIF4GD PPP1R14C YIPF5 CERCAM<br/> F11R TDO2 GIPC1 FAM193B CEMIP2 MIR22HG SPARC FASTKD1 PPFIA4 CTSZ<br/> LMNA NDUFA10 CCDC92 KLF10 PPP1R18 PANK4 SLC2A1-DT C18orf54 MAGED2<br/> PDIA4 RFLNB ADAM15 LNCNRLR SLC4A11 PGM3 SESN2 TENT5A ZNF133 CISH<br/> CYP4F29P PXX WHRN NCOA4 RPS6KC1 SELENBP1 TMED4 MROH1 SUSP1 ICAM5<br/> TUBB4A MBOAT2 MYBPHL GPAT3 TUBB1 NPTXR MNX1 PHF21A LINC01630 HDAC6<br/> CYP2R1 TNNT1 MISP3 DCAF8 CTSC </p> |
|--|-----------------------------------------------------------------------------------------------------------------------------------------------------------------------------------------------------------------------------------------------------------------------------------------------------------------------------------------------------------------------------------------------------------------------------------------------------------------------------------------------------------------------------------------------------------------------------------------------------------------------------------------------------------------------------------------------------------------------------------------------------------------------------------------------------------------------------------------------------------------------------------------------------------------------------------------------------------------------------------------------------------------------------------------------------------------------------------------------------------------------------------------------------------------------------------------------------------------------------------------------------------------------------------------------------------------------------------------------------------------------------------------------------------------------------------------------------------------------------------------------------------------------------------------------------------------------------------------------------------------------------------------------------------------------------------------------------------------------------------------------------------------------------------------------------------------------------------------------------------------------------------------------------------------------------------------------------------------------------------------------------------------------------------------------------------------------------------------------------------------------------------------------------------------------------------------------------------------------------------------------------------------------------------------------------------------------------------------------------------------------------------------------------------------------------------------------------------------------------------------------------------------------------------------------------------------------------------------------------------------------------------------------------------------------------------------------------------------------------------------------------------------------------------------------------------------------------------------------------------------------------------------------------------------------------------------------------------------------------------------------------------------------------------------------------------------------------------------------------------------------------------------------------------------------------------------------------------------------------------------------------------------------------------------------------------------------------------------------------------------------------------------------------------------------------------------------------------------------------------------------------------------------------------------------------------------------------------------------------------------------------------------------------------------------------------------------------------------------------------------------------------------------------------------------------------------------------------------------------------------------------------------------------------------------------------------------------------------------------------------------------------------------------------------------------------------------------------------------------------------------------------------------------------------------------------------------------------------------------------------------------------------------------------------------------------------------------------------------------------------------------------------------------------------------------------------------------------------------------------------------------------------------------------------------------------------------------------------------------------------------------------------------------------------------------------------------------------|

**Table S12.** Top-20 GO associations with molecular function (MF), biological process (BP), or cellular component (CC) of 1285 upregulated genes. The search was performed in GO Profiler (<https://biit.cs.ut.ee/gprofiler/gost>)

| GO.ID      | Description          | padj                  | Genes                                                                                                                                                                                                                                                                                                                                                                                                                                                                                                                                                                                                                                                                                                                                                                                                                                                                                                                                                                                                                                                                                                                                                                                                                                                                                                                                                                                                                                                                                                                                                                                                                                                                                                                                                                                                                                                                                                                                                                                                                                                                                                                                                                                                                                                                                                                                                                                                                                                                                                                                                                                                                                         |
|------------|----------------------|-----------------------|-----------------------------------------------------------------------------------------------------------------------------------------------------------------------------------------------------------------------------------------------------------------------------------------------------------------------------------------------------------------------------------------------------------------------------------------------------------------------------------------------------------------------------------------------------------------------------------------------------------------------------------------------------------------------------------------------------------------------------------------------------------------------------------------------------------------------------------------------------------------------------------------------------------------------------------------------------------------------------------------------------------------------------------------------------------------------------------------------------------------------------------------------------------------------------------------------------------------------------------------------------------------------------------------------------------------------------------------------------------------------------------------------------------------------------------------------------------------------------------------------------------------------------------------------------------------------------------------------------------------------------------------------------------------------------------------------------------------------------------------------------------------------------------------------------------------------------------------------------------------------------------------------------------------------------------------------------------------------------------------------------------------------------------------------------------------------------------------------------------------------------------------------------------------------------------------------------------------------------------------------------------------------------------------------------------------------------------------------------------------------------------------------------------------------------------------------------------------------------------------------------------------------------------------------------------------------------------------------------------------------------------------------|
| <b>MF</b>  |                      |                       |                                                                                                                                                                                                                                                                                                                                                                                                                                                                                                                                                                                                                                                                                                                                                                                                                                                                                                                                                                                                                                                                                                                                                                                                                                                                                                                                                                                                                                                                                                                                                                                                                                                                                                                                                                                                                                                                                                                                                                                                                                                                                                                                                                                                                                                                                                                                                                                                                                                                                                                                                                                                                                               |
| GO:0003676 | nucleic acid binding | 4.044611317588401e-59 | NOP14, SNRPB, MITF, JMJD1C, MIS18BP1, DAP3, RBM48, PPAN, MSH3, CHTOP, ERAL1, ZNF274, SEC23IP, PRPF38B, KMT2B, RNASEH1, SREK1, MACROH2A1, BRD9, FBRS1, MUS81, NOL11, MTA2, RAD51C, UTP3, CWC22, MTRX, PHF5A, NACA, POLR1C, MED6, SRP72, METTL3, EZH2, TCF20, DCLRE1C, NOC4L, MFAP1, LRRFIP1, GPATC3, H4C5, SMG5, BRD4, RRP9, MRPL1, ZNF581, ZNF74, MRPL11, AHCTF1, RPUSD4, DENR, HROB, MRPS30, MED1, NVL, HNRNPL, WDR46, MCM10, EFTUD2, CHRC1, KMT2D, TAF4B, PQBP1, AIFM2, PSCP1, CEP350, POLDIP2, ZBTB40, DHX38, ADNP2, NOP16, ARID2, DDX23, PATZ1, TRNT1, RNPS1, LHX4, ZNF512B, RBL1, RPUSD1, RBM45, NOSIP, HNRNPH1, ZNF512, DNMT1, LYL1, PPP5C, BAP1, JRK, SUB1, DHX16, TOP2B, LYAR, LRWD1, EIF4EBP2, CCT6A, KAT7, CLTC, EEF2, FUBP3, IMP4, BCCIP, FAM120A, RNF40, NONO, MEF2C, TCF3, MAF1, CLSPN, NOL9, PRPF6, ZC3H4, PEBP1, ZNF26, ZNF24, GSPT1, GRSF1, NXF1, ZC3HAV1, HNRNPA3, MAPK1, EEF1D, POLR1E, ABT1, R3HDM1, CERS2, DHX33, NCOA5, DHX15, UIMC1, PUM1, MTOR, DHX30, UTP18, IKZF3, CPSF3, SPEN, GOT2, SMARCA5, SF3A2, H2AW, EIF3D, ZNF45, TFAP4, NIFK, HNRNPA0, ZNF131, SBN01, ZNF431, NAP1L4, DHFR, MTDH, HSPA9, TCF7L2, ZNF239, SRRM2, MRPL15, ASCC3, UBE2L3, THOC1, SETMAR, RPTOR, PPP1R10, MRPS35, TMEM18, CSTF2, TNF, RAVR1, EIF4B, SAMS1, WDR33, NIP7, IGF2BP3, NOL7, ELL2, PUM2, H2AZ2, WDR3, MT-<br>TL1, SSBP3, SNRPA, ZNF586, BACH1, DDX10, RBM10, SETX, NFILZ, TRMT2A, APEX1, BPTF, NAA15, ARID1A, PP1CC, ZC3H14, SRSF10, AKAP8, SBDS, RCC1, C1QBP, VPS72, ZNF587B, SRSF8, PRPF4, KTN1, PRMT5, PCBP2, ADD1, TRMT6, RBMX, BAZ1A, MLLT3, RAD23B, TAF4, RBM14, RBM8A, KDM3B, BOP1, ZNF326, API5, FEN1, ZNF282, TFDP2, GTF3C6, SLBP, NUCKS1, UTP25, TMPO, PRPF38A, SSB, GNL3L, DNTTIP2, IBA57, RNU6-322P, NSRP1, MT-<br>TF, TFIP11, STRBP, EIF3G, DHX29, BRCA2, EIF3M, RBM42, ZFX, ZC3H7B, SNRPD1, PAN3, ZC3H18, FASTKD2, TCOF1, XRCC2, ZNF75A, SMARCB1, TRIR, CREBBP, EXOSC3, WBP11, EPRS1, LSM14A, NUP98, HNRNPUL1, CNOT1, ASH1L, LRRC59, GEMIN5, PLAGL2, BTF3, POLR1B, DX42, ELOF1, WDR6, NFYC, SF1, PELP1, ZCCHC14, XRN2, EZR, TRUB2, DDX20, DDX51, ELOA, TAF9, YWHAG, ELAVL1, UTP15, VCP, RYBP, SAFB2, DHX34, PSIP1, CSTB, DCAF13, RBM12, STIP1, PNO1, POLR3C, THG1L, RBM25, SETD1A, RRP12, SMC1A, AGO2, E2F4, G3BP1, GNL2, RRP36, MCM6, AQR, CLCN6, DDX18, ADNP, NFKB1, UBTX, ZNF622, CHD7, RBM15B, HNRNPA1, GAR1, RRS1, PPARGC1B, MAGOH, PBRM1, CTCF, HHEX, ANKRD17, HNRNPR, ELF1, ZNF614, NSD1, RSL1D1, CCT3, H3-3B, RNF138, SETD1B, PKM, FOXK2, HMGB1, BZW1, CANX, YY1, NOL8, MLLT10, PUS7, NAT10, TRMT10C, METAP2, SNU13, SRSF6, EP400, SART1, CEBPZ, MECP2, CSDE1, MBNL1, SKI, DDX54, TARDBP, LARP4, XRCC6, PNN, RP |

|            |                 |                            |                                                                                                                                                                                                                                                                                                                                                                                                                                                                                                                                                                                                                                                                                                                                                                                                                                                                                                                                                                                                                                                                                                                                                                                                                                                                                                                                                                                                                                                                                                                                                                                                                                                                            |
|------------|-----------------|----------------------------|----------------------------------------------------------------------------------------------------------------------------------------------------------------------------------------------------------------------------------------------------------------------------------------------------------------------------------------------------------------------------------------------------------------------------------------------------------------------------------------------------------------------------------------------------------------------------------------------------------------------------------------------------------------------------------------------------------------------------------------------------------------------------------------------------------------------------------------------------------------------------------------------------------------------------------------------------------------------------------------------------------------------------------------------------------------------------------------------------------------------------------------------------------------------------------------------------------------------------------------------------------------------------------------------------------------------------------------------------------------------------------------------------------------------------------------------------------------------------------------------------------------------------------------------------------------------------------------------------------------------------------------------------------------------------|
|            |                 |                            | <p>L22, PCNA, MBD1, UPF2, DIAPH1, DDX3X, LBR, HDGF, ZNF789, EIF4G2, MCM2, JUND, AATF, ZMPSTE24, UBAP2, SLC25A5, SLTM, URB1, DNAJC21, UBP1, POLE, EXOSC9, POLR2A, CCDC86, DYNC1H1, TSR1, RBM19, XPO1, PPIA, PRPF3, TPR, SRSF7, UTP20, ZFP36L2, SF3B4, PPRC1, EBNA1BP2, ZFR, TFB2M, UBE2N, NRIP1, MRT04, GFM1, MYBBP1A, DDB1, BACH2, PITX1, GTF3C4, LRRC47, ASXL2, TCP1, RALY, ENO1, CCT5, FUBP1, POLE3, CDC5L, CHD3, NUP153, RAN, BEND3, UBC, ZNF787, TFAM, MSB2, ZBTB2, DDO1, GLYR1, KMT2A, MCM3, NOSTRIN, GRWD1, H4C8, CERS6, PRDX1, TNPO1, GATAD2A, DKC1, DDY1, H2BC12, THUMP1, EWSR1, DDX49, CASC3, SSRP1, ARID1B, KPNB1, CPSF7, RRP1, ZNF33B, HNRNPAB, KAT6A, USP36, RBBP4, SAFB, NCBP1, HEATR1, HSP90AB1, EIF3B, DUS3L, PA2G4, HNRNPK, SMG1, DHX37, SMARCA4, EIF3J, PRKDC, ZNF121, TRA2B, PRMT1, HNRNPC, SF3A3, SUPT16H, HMGA1, FARSA, CELF1, RBMXL1, XRCC5, DDX5, UTP4, DEK, LMNB1, DDX46, EIF4A3, SURF6, DDY39A, DDX56, CIZ1, CDT1, UBAP2L, NOP56, HNRNPDL, KHDRBS1, HNRNPD, LRPPRC, EIF5A, SUPT6H, RANBP2, DNABJ6, NOLC1, SNRNP200, SREBF2, ABCF1, MGA, NSUN2, HSPD1, YBX1, LIN28B, EIF5B, RBM3, SF3A1, MPHOSPH10, GDI2, PES1, MYH10, IPO5, RREB1, EP300, DAZAP1, ALYREF, RRP1B, CLUH, FOSB, SRRT, PABPC1, PRRC2C, SERBP1, AHNK, PRPF8, SF3B3, THRAP3, HNRNPF, NPM1, ETF1, SON, WDR43, TFRC, RUNX1, NQO1, EIF4G1, TRIM28, U2AF2, NR2F2, BCLAF1, SRSF2, HSP90AA1, NFATC3, ZNF521, CAPRIN1, TRMT1, MCM4, TRIM24, NOP58, HNRNPA2B1, LARP1, PTBP1, CCAR1, DDX21, SFPQ, PABPC4, HNRNPM, POLR1A, KCNH2, SRSF3, EIF3A, MCM7, SMARCC1, MYC, SET, IGF2BP1, FOS, MYB, KHSRP, ZEB2, FUS, ILF3, FASN, ACTB, DHX9, HNRNPU, MCM5, NCL, EGR1, HSPA8</p>                           |
| GO:0005515 | protein binding | 2.866947137<br>1796823e-55 | <p>HRAS, NOP14, CENPN, TXK, ACSF3, DSG2, SNRBP, TMEM127, MTF, C10RF216, PPP6C, JMJD1C, MIS18BP1, DA3, RBM48, MSH3, TRIP13, CHTOP, ERAL1, ZNF274, SEC23IP, ABRAXAS2, DNAJA2, GYG1, KMT2B, AFF1, MMAB, RNASEH1, SUPT7L, SREK1, MACROH2A1, BRD9, MED16, FADS2, MUS81, NOL11, CCDC138, BICRA, KCNK5, MTA2, TIRAP, RAD51C, NRROS, AAMP, UTP3, CWC22, CPNE7, BEGAIN, UBE2Q1, NEU1, DCAF7, MTREX, OTUD6B, RIOX1, PHF5A, QRF, NACA, POLR1C, MED6, SRP72, TRIM35, CBX3, PHB, METTL3, EZH2, SNX17, TOMM70, TCF20, FES, RAB10, DCLRE1C, NOC4L, RWD3, MFAP1, ULK3, DNML, PAXIP1, LRRFIP1, GPATCH3, RHEB, ASAP1, INTS6, PPP6R3, H4C5, FUT8, NCAPH2, SMG5, IFRD2, BRD4, STT3A, DHDDS, VKORC1L1, RRP9, MRPL1, ZNF581, SPIN4, SH3YL1, MRPL11, RPUSD4, CHCHD3, DENR, RNASEH2C, HROB, ANKRD13A, CTDP1, NUP155, MED1, NVL, POM121C, KIF26B, SRM, HNRNPL, MYO16, PWP1, ATP11A, WDR46, MCM10, OXA1L, EFTUD2, CHAC1, EML4, CRCP, GPN2, RANBP3, FRMD8, KMT2D, STAG2, CASP8, TAF4B, PSMA3, PQBP1, PSMD3, AIFM2, PSCP1, CEP350, MAD2L2, MRRF, POLDIP2, PSMC3, ZBTB40, NAA11, TIMM44, DHX38, ADNP2, NT5C3A, MS4A4A, FBXO45, ARID2, DDX23, PATZ1, TRIM44, TRNT1, MNS1, RNPS1, MTCH2, ALMS1, LHX4, ZNF512B, RBL1, PPP3R1, TPRN, SLC25A46, SYPL1, HIF1AN, USP11, RPUSD1, SS18L1, RBM45, MED9, NOSIP, PAFAH1B1, STAG1, HNRNPH1, USP14, RAB7A, LIMD1, ZNF512, DNMT1, LYL1, NAA20, BICD1, PPP5C, BAP1, JRK, DUS1L, ANAPC7, SUB1, GTF2H1, DHX16, BUB3, GAB2, TOP2B, LYAR, LRWD1, THOP1, CCNH, NAB2, EXOC7, EIF4EBP2, CCT6A, KAT7, TPP2, CLTC, EEF2, AFG3L2, MSRA, AURKAIP1, WDR5, CCT8, KIF5B, TMEM43, RTL10, FUBP3, IMP4, BCCIP, SPRY2, DLAT, NOB1, RN40, CUL3, ARPP19, CMPK1, NONO, MEF2C, TCF3, NUP1</p> |

|  |  |  |                                                                                                                                                                                                                                                                                                                                                                                                                                                                                                                                                                                                                                                                                                                                                                                                                                                                                                                                                                                                                                                                                                                                                                                                                                                                                                                                                                                                                                                                                                                                                                                                                                                                                                                                                                                                                                                                                                                                                                                                                                                                                                                                                                                                                                                                                                                                                                                                                                                                                                                                                                                                                                                                                                                                                                                                                                                                        |
|--|--|--|------------------------------------------------------------------------------------------------------------------------------------------------------------------------------------------------------------------------------------------------------------------------------------------------------------------------------------------------------------------------------------------------------------------------------------------------------------------------------------------------------------------------------------------------------------------------------------------------------------------------------------------------------------------------------------------------------------------------------------------------------------------------------------------------------------------------------------------------------------------------------------------------------------------------------------------------------------------------------------------------------------------------------------------------------------------------------------------------------------------------------------------------------------------------------------------------------------------------------------------------------------------------------------------------------------------------------------------------------------------------------------------------------------------------------------------------------------------------------------------------------------------------------------------------------------------------------------------------------------------------------------------------------------------------------------------------------------------------------------------------------------------------------------------------------------------------------------------------------------------------------------------------------------------------------------------------------------------------------------------------------------------------------------------------------------------------------------------------------------------------------------------------------------------------------------------------------------------------------------------------------------------------------------------------------------------------------------------------------------------------------------------------------------------------------------------------------------------------------------------------------------------------------------------------------------------------------------------------------------------------------------------------------------------------------------------------------------------------------------------------------------------------------------------------------------------------------------------------------------------------|
|  |  |  | <p> 60,MAF1,GID8,CLSPN,NOL9,MVK,NBAS,PLK4,CCNY,CRIM1,SLK,ZFYVE26,PRPF6,ZC3H4,TMEM33,PEBP1,ZNF26,ZNF24,GSPT1,CLPTM1,PEPD,GRSF1,NXF1,UBQLN4,ACTR8,FAHD1,PSMC5,AGPAT3,STK35,TIMM23,ZC3HAV1,CAPZA1,HNRNPA3,MAPK1,STAR,ZNRF1,EEF1D,CASP3,POLR1E,ANKRD36C,ATP2A2,IPO9,PKP3,ABCF3,ABT1,TULP4,SURF4,PCLAF,WDR36,R3HDM1,HBG1,PDSS1,CERS2,DHX33,STRIP1,PGAM5,NSMAF,LETM1,CTR9,NCOA5,TBCD,DHX15,UIMC1,PUM1,NEMP1,MTOR,DHX30,UHRF1BP1,RPRD2,UTP18,IKZF3,KANSL1,CPSF3,SPEN,LCLAT1,VDAC1,SMG9,SMARCA5,SNX8,CWC25,SF3A2,H2AW,EIF3D,RSF1,TFA P4,NAA50,KCTD3,PTP4A2,CLDN11,DELE1,PRMT6,TSPYL5,KPNA4,NIFK,TBC1D9B,FAF1,HNRNPA0,BAG6,EMD,ZNF131,PCYT1A,SBN01,TASOR2,FKBP15,NAP1L4,DHFR,MTDH,BAIAP2,COMMD4,HSPA9,MCCC1,TCF7L2,ZNF239,SRRM2,NSDHL,MRPL15,PRAME,PCNX4,ASCC3,UROD,UBE2L3,THOC1,PSMC2,MCMBP,SETMAR,RPTOR,PPIL2,PPP1R10,HECTD1,TMEM18,CSTF2,TNF,RAVER1,GRPEL1,RABGGTB,EIF4B,SAMSN1,WDR33,NIP7,PPP2R5A,TRMT61A,IGF2BP3,NOL7,ANKRD33B,MED28,ELL2,FAM71F2,PUM2,H2AZ2,HAT1,MRFAP1L1,MCRIP2,CLTA,WDR3,SSBP3,GUCD1,SNRPA,BACH1,PDZD8,RBM10,CERT1,TRAM2,SETX,TRMT2A,AP3D1,NAPA,PSMG2,STK24,APEX1,BPTF,ATP6V1G1,UFC1,EDC4,ICE1,RIOK2,NAA15,ARID1A,NUP43,AMECCR1,TRAM1,SPECC1,ADO,PPP1CC,KCNQ5,CAVIN2,ZC3H14,CDC27,HERC2,RAB35,SRSF10,CTSL,AKAP8,SBDS,RCC1,C1QBP,VPS72,PPM1H,CRK,TICRR,ME D15,EOGT,STK25,CAPNS1,SRSF8,WDR74,PAK2,ZMYND19,ARHGAP21,PRPF4,KTN1,PRMT5,SNX9,PCBP2,GNB1L,ADD1,TRMT6,RBMX,RNF126,BAZ1A,DYFS,GPX4,YJU2,WDR70,MCCC2,SLC25A3,MLLT3,ALG8,RAD23B,VAT1,TAF4,RBM14,RBM8A,ARHGAP6,BOP1,GOLM1,LRP8,LRR58,SETD2,ZNF326,API5,INTS13,RP1A,UCK2,BTBD1,OXNAD1,TUBB,FEN1,CHAF1A,TRMO,DYRK1A,TFDP2,WDR12,FAM193A,GTFC6,SLBP,CUL4A,DNAJC8,JADE2,NUCKS1,SDCBP,PSMD1,UTP25,AMD1,TMPO,NUP50,PRPF38A,SSB,CDC37,ECHDC1,AGPAT5,GNL3L,DNTTIP2,CYB5B,IBA57,RILP,NSRP1,TFIP11,KCTD15,STRBP,PSMB2,WAC,EIF3G,ADI1,BSN,DHX29,ARHGEF2,IL17D,BRCA2,RANBP1,POLR2D,ZDHHC5,EIF3M,WTAP,COPS2,NIN,BCL7B,RBM42,ZC3H7B,ACLY,SNRPD1,PAN3,PAF1,ZC3H18,BIRC6,ERMAP,FASTKD2,RABL6,PHB2,TCOF1,LRR41,TOMM22,RAP1GAP2,GRB10,XRCC2,PDS5A,BRCC3,ZNF75A,SMARCB1,TRIR,CREBBP,EXOSC3,WBP11,KIFC3,AHSA1,EPRS1,COPS3,UBE4B,INSIG1,LSM14A,ABLIM1,TMX2,NUP98,HNRNPUL1,CNOT1,CUTA,LYN,ASH1L,LRR59,GEMIN5,PHACTR2,PLAGL2,APC,BTF3,POLR1B,JPT2,DDX42,CAPN1,ELOF1,WDR6,NFYC,SF1,PELP1,ZCCHC14,SLC12A2,XRN2,TMEM201,EZR,DDX20,URM1,MMS19,ELOA,TAF9,ACAT2,YWHAG,ELAVL1,UTP15,VCP,DNAJB12,WASHC5,RYBP,SAFB2,GBP2,MAPK1IP1L,KIAA0100,DHX34,TMEM69,PSIP1,CSTB,CNK1G2,DCAF13,BEX4,RBM12,STIP1,CDK4,DVL2,PNO1,POLR3C,THG1L,RBM25,SETD1A,SCAP,WDR82,SMC1A,AGO2,E2F4,DCBLD2,TJP1,VPS26A,FOXRED2,G3BP1,PCM1,RNF220,TBC1D14,SAE1,MCM6,AQR,DHCR7,ARL8B,DDX18,IER3,IGF2R,ATP6V0D1,ADNP,UBA2,NFKB1,UBTF,ZNF622,ARHGDIA,BRD2,CHD7,RBM15B,DOK3,USP37,HNRNPA1,GAR1,RRS1,PPARGC1B,MAGOH,PBRM1,CTCF,RANBP10,HHEX,ANKRD17,HNRNPR,RRM2,RRM1,PI4KA,SEC24B,ELF1,ZNF614,NSD1,RSL1D1,CCT3,CDK7,H3-3B,RNF138,SETD1B,PPIF,PKM,FOKK2,KIF2A,HMGB </p> |
|--|--|--|------------------------------------------------------------------------------------------------------------------------------------------------------------------------------------------------------------------------------------------------------------------------------------------------------------------------------------------------------------------------------------------------------------------------------------------------------------------------------------------------------------------------------------------------------------------------------------------------------------------------------------------------------------------------------------------------------------------------------------------------------------------------------------------------------------------------------------------------------------------------------------------------------------------------------------------------------------------------------------------------------------------------------------------------------------------------------------------------------------------------------------------------------------------------------------------------------------------------------------------------------------------------------------------------------------------------------------------------------------------------------------------------------------------------------------------------------------------------------------------------------------------------------------------------------------------------------------------------------------------------------------------------------------------------------------------------------------------------------------------------------------------------------------------------------------------------------------------------------------------------------------------------------------------------------------------------------------------------------------------------------------------------------------------------------------------------------------------------------------------------------------------------------------------------------------------------------------------------------------------------------------------------------------------------------------------------------------------------------------------------------------------------------------------------------------------------------------------------------------------------------------------------------------------------------------------------------------------------------------------------------------------------------------------------------------------------------------------------------------------------------------------------------------------------------------------------------------------------------------------------|

|            |             |                        |                                                                                                                                                                                                                                                                                                                                                                                                                                                                                                                                                                                                                                                                                                                                                                                                                                                                                                                                                                                                                                                                                                                                                                                                                                                                                                                                                                                                                                                                                                                                                                                                                                                                                                                                                                                                                                                                                                                                                                                                                                                                                                                                                                                                                                                                                                                                                                                                                                                                                                                                                                                              |
|------------|-------------|------------------------|----------------------------------------------------------------------------------------------------------------------------------------------------------------------------------------------------------------------------------------------------------------------------------------------------------------------------------------------------------------------------------------------------------------------------------------------------------------------------------------------------------------------------------------------------------------------------------------------------------------------------------------------------------------------------------------------------------------------------------------------------------------------------------------------------------------------------------------------------------------------------------------------------------------------------------------------------------------------------------------------------------------------------------------------------------------------------------------------------------------------------------------------------------------------------------------------------------------------------------------------------------------------------------------------------------------------------------------------------------------------------------------------------------------------------------------------------------------------------------------------------------------------------------------------------------------------------------------------------------------------------------------------------------------------------------------------------------------------------------------------------------------------------------------------------------------------------------------------------------------------------------------------------------------------------------------------------------------------------------------------------------------------------------------------------------------------------------------------------------------------------------------------------------------------------------------------------------------------------------------------------------------------------------------------------------------------------------------------------------------------------------------------------------------------------------------------------------------------------------------------------------------------------------------------------------------------------------------------|
|            |             |                        | <p>1,MAEA,BZW1,SMARCD1,GNAQ,CANX,YY1,NOL8,MLLT10,IRAK1,PUS7,C19ORF25,PIK3C2B,IP6K1,NAT10,TRMT10C,METAP2,SNU13,SRSF6,EP400,AASDHPT,MTHFD1,ADSS2,SART1,LEPR,MECP2,CSDE1,PARD3,MBNL1,SKI,PRKAR2B,TKT,DDX54,AZIN1,CCDC6,NCR3LG1,N4BP2,TARDBP,LARP4,XRCC6,PNN,RPL22,ABI1,KLHL21,PCNA,CDC25A,MBD1,CSNK2A2,UPF2,DIAPH1,DDX3X,KIAA0753,IQGAP2,IDI1,TNPO2,SACS,LBR,HDGF,NCAPH,ZNF789,VPS35,ATP5MC3,EIF4G2,MCM2,JUND,CFL1,HCFC1,CHEK1,AATF,CLN6,ECSIT,ZMPSTE24,UBAP2,PRMT7,OXCT1,RETREG2,SLC25A5,ARPC4,SLTM,CYP3A5,S1PR3,VAC14,POM121,CHAMP1,DNAJC21,UBP1,POLE,TRRAP,PIIP5K2,NUDC,EXOSC9,CSK,CCDC86,DNAJC7,DNAJA1,SUMO3,NUP62,DYNC1H1,TSR1,SLC19A1,XPO1,PPIA,PRPF3,IK,CLCN7,PHACTR1,SERPINE1,TPR,ENC1,SRSF7,UTP20,TGFBRAP1,ZFP36L2,SF3B4,SLC38A2,EBNA1BP2,ZFR,KEAP1,UBE2N,BAZ1B,NRIP1,MACO1,MRTO4,VAPA,TLK1,TEX10,GFM1,MYBBP1A,DDDB1,BACH2,PSMG1,PITX1,GTFC3C4,LRRC47,NASP,ASXL2,TCP1,SLITRK6,EMP3,CENPF,YWHAB,RALY,ENO1,FAM83H,CCT5,FUBP1,POLE3,CDK6,CDC5L,CHD3,ST3GAL2,NUP153,RAN,BEND3,UBC,WDR81,TFAM,HSPA4,AK2,PPP2CA,SSU72,MSH2,CDK12,ZBTB2,GLYR1,KMT2A,MCM3,NOSTRIN,GRWD1,TOMM40,PAICS,H4C8,SLC30A10,CERS6,ARMC6,PRDX1,TNPO1,GATAD2A,DKC1,DDX1,H2BC12,STX3,CUL1,LTBR,THUMPD1,CTPS1,EWSR1,DDX49,CASC3,SSRP1,ARID1B,KPNB1,CPSF7,RRP1,SPTB,TXNRD1,ZNF33B,ATP6V0A1,HNRNPAB,KAT6A,ATAD3A,ARF6,USP36,RBBP4,CNPPD1,SAFB,NCBP1,HEATR1,CCT2,HSP90AB1,EIF3B,RCSD1,DUS3L,PA2G4,HNRNPK,SMG1,DHX37,FDFT1,PRPF19,SMARCA4,EIF3J,PRKDC,YES1,ZNF121,TRA2B,PRMT1,HNRNPC,MALT1,WWP2,SF3A3,SUPT16H,HMGA1,FARSA,CELF1,NCLN,XRCC5,DDX5,PSME3,TMEM97,ANK1,UTP4,DEK,LMO2,LMNB1,DDX46,LSS,EIF4A3,NDS1,NUP214,TRIP12,IPO7,ACTG1,SURF6,DDX39A,DDX56,SLC38A1,CIZ1,CDT1,UBAP2L,NOP56,HNRNPDL,CORO1C,KHDRBS1,HNRNPD,RAPGEF1,LRPPRC,EIF5A,FAM136A,CTDSP1,SLC7A1,SUPT6H,RANBP2,DNAJB6,NOLC1,GSE1,SNRNP200,SREBF2,CBFA2T3,STXBP5,ABCF1,ACACA,TAF1A,MGA,AP5Z1,HSPD1,PIM2,GAPDH,YBX1,LIN28B,EIF5B,PCYT2,ATP6V1C1,RBM3,STAR7,SF3A1,LMNB2,AXIN1,MS4A3,MPHOSPH10,GDI2,PES1,ANP32B,MYH10,IPO5,HSPH1,EP300,TGFBRL,DAZAP1,PCNT,STMN1,RRP1B,FOSB,PPM1G,STON2,SRRT,PABPC1,PRRC2C,SERBP1,ST7,AHNAK,PRPF8,COA7,SF3B3,PTMA,FTL,THRAP3,MLLT1,ELOVL6,HNRNPF,MT-</p> <p>ND1,NPM1,RIF1,CITED2,ETF1,SON,WDR43,TFRC,RUNX1,NQO1,EIF4G1,TRIM28,NEFH,U2AF2,NR2F2,BCLAF1,ECPAS,SRSF2,HSP90AA1,MDN1,NFATC3,ZNF521,CAPRIN1,TRMT1,SOLE,MCM4,TRIM24,NOP58,RESF1,HNRNPA2B1,KIF1A,SPN,BAG1,LARP1,SQSTM1,HBZ,PTBP1,CCAR1,MAT2A,DDX21,HMGCS1,SFPQ,SCD,PABPC4,HNRNPM,POLR1A,KCNH2,SRSF3,ANKRD11,EIF3A,MCM7,SMARCC1,MYC,SET,VGF,BTG1,IGF2BP1,FOS,GCLM,HMGCR,SPTA1,MYB,ODC1,KHSRP,ZEB2,RELN,FUS,ILF3,FASN,GLUL,ACTB,DHX9,HNRNPU,MCM5,NCL,EGR1,DHCR24,HSPA8,FTH1</p> |
| GO:0003723 | RNA binding | 3.0604824045501514e-55 | <p>NOP14,SNRPB,DAP3,RBM48,PPAN,CHTOP,ERAL1,SEC23IP,PRPF38B,RNASEH1,SREK1,FBRSL1,NOL11,UTP3,CWC22,MTRRX,PHF5A,SRP72,METTL3,EZH2,TCF20,NOC4L,MFAP1,LRRFIP1,H4C5,SMG5,RRP9,MRPL1,ZNF74,MRPL11,RPUSD4,DENR,MRPS30,NVL,HNRNPL,WDR46,EFTUD2,PSPC1,DHX38,NOP16,DDX23,T</p>                                                                                                                                                                                                                                                                                                                                                                                                                                                                                                                                                                                                                                                                                                                                                                                                                                                                                                                                                                                                                                                                                                                                                                                                                                                                                                                                                                                                                                                                                                                                                                                                                                                                                                                                                                                                                                                                                                                                                                                                                                                                                                                                                                                                                                                                                                                          |

|            |                               |                       |                                                                                                                                                                                                                                                                                                                                                                                                                                                                                                                                                                                                                                                                                                                                                                                                                                                                                                                                                                                                                                                                                                                                                                                                                                                                                                                                                                                                                                                                                                                                                                                                                                                                                                                                                                                                                                                                                                                                                                                                                                                                                                                                                                                                                                                                                           |
|------------|-------------------------------|-----------------------|-------------------------------------------------------------------------------------------------------------------------------------------------------------------------------------------------------------------------------------------------------------------------------------------------------------------------------------------------------------------------------------------------------------------------------------------------------------------------------------------------------------------------------------------------------------------------------------------------------------------------------------------------------------------------------------------------------------------------------------------------------------------------------------------------------------------------------------------------------------------------------------------------------------------------------------------------------------------------------------------------------------------------------------------------------------------------------------------------------------------------------------------------------------------------------------------------------------------------------------------------------------------------------------------------------------------------------------------------------------------------------------------------------------------------------------------------------------------------------------------------------------------------------------------------------------------------------------------------------------------------------------------------------------------------------------------------------------------------------------------------------------------------------------------------------------------------------------------------------------------------------------------------------------------------------------------------------------------------------------------------------------------------------------------------------------------------------------------------------------------------------------------------------------------------------------------------------------------------------------------------------------------------------------------|
|            |                               |                       | <p>RNT1,RNPS1,RPUSD1,RBM45,NOSIP,HNRNPH1,DNMT1,PPP5C,JRK,SUB1,DHX16,LYAR,CCT6A,CLTC,EEF2,FUBP3,IMP4,BCCIP,FAM120A,RNF40,NONO,NOL9,PRPF6,ZC3H4,PEBP1,GSPT1,GRSF1,NXF1,ZC3HAV1,HNRNPA3,ABT1,R3HDM1,DHX33,NCOA5,DHX15,PU M1,DHX30,UTP18,CPSF3,SPEN,GOT2,SF3A2,EIF3D,NIFK,HNRNPA0,NAP1L4,DHFR,MTDH,HSPA9,ZNF239,SRRM2,MRPL15,ASCC3,UBE2L3,THOC1,PPP1R10,MRPS35,CSTF2,RAVER1,EIF4B,SAMSN1,WDR33,NIP7,IGF2BP3,NOL7,PUM2,WDR3,MT-TL1,SNRPA,DDX10,RBM10,SETX,TRMT2A,APEX1,NA A15,PPP1CC,ZC3H14,SRSF10,AKAP8,SBDS,C1QBP,SRSF8,PRPF4,KTN1,PCBP2,ADD1,TRMT6,RBMX,RBM14,RBM8A,BOP1,ZNF326,API5,SLBP,NUCKS1,UTP25,PRPF38A,SSB,GNL3L,DNTTIP2,IBA57,RNU6-322P,NSRP1,MT-TF,STRBP,EIF3G,DHX29,RBM42,ZC3H7B,SNRPD1,P AN3,ZC3H18,FASTKD2,TCOF1,TRIR,EXOSC3,WBP11,EPRS1,LSM14A,NUP98,HNRNPUL1,CNOT1,LRRCS9,GEMIN5,BTF3,DDX42,WDR6,SF1,PELP1,XRN2,EZR,TRUB2,DDX20,DDX51,YWHAG,ELAVL1,UTP15,VCP,S AFB2,DHX34,PSIP1,CSTB,DCAF13,RBM12,STIP1,P NO1,THG1L,RBM25,SETD1A,RRP12,SMC1A,AGO2,G3 BP1,GNL2,RRP36,AQR,CLCN6,DDX18,UBTF,ZNF622,RBM15B,HNRNPA1,GAR1,RRS1,PPARGC1B,MAGOH,A NKRD17,HNRNPR,RSL1D1,CCT3,SETD1B,PKM,HMGB1,BZW1,CANX,YY1,NOL8,PUS7,NAT10,TRMT10C,MET AP2,SNU13,SRSF6,SART1,CEBPZ,MECP2,CSDE1,MB NL1,DDX54,TARDBP,LARP4,XRCC6,PNN,RPL22,UPF2,DIAPH1,DDX3X,LBR,HDGF,EIF4G2,AATF,UBAP2,SLC25A5,SLTM,URB1,DNAJC21,EXOSC9,CCDC86,DY NC1H1,TSR1,RBM19,XPO1,PPIA,PRPF3,TPR,SRSF7,UTP20,ZFP36L2,SF3B4,PPRC1,EBNA1BP2,ZFR,TF B2M,UBE2N,MRT04,GFM1,MYBBP1A,LRRC47,TCP1,R ALY,ENO1,CCT5,FUBP1,CDC5L,CHD3,RAN,UBC,TFA M,DIDO1,GRWD1,H4C8,PRDX1,TNPO1,DKC1,DDX1,T HUMPD1,EWSR1,DDX49,CASC3,SSRP1,KPNB1,CPSF7,RRP1,HNRNPAB,USP36,SAFB,NCBP1,HEATR1,HSP90AB1,EIF3B,DUS3L,PA2G4,HNRNPK,SMG1,DHX37,S MARCA4,PRKDC,TRA2B,PRMT1,HNRNPC,SF3A3,SUPT16H,HMGA1,FARSA,CELF1,RBMXL1,XRCC5,DDX5,UT P4,DEK,DDX46,EIF4A3,SURF6,DDX39A,DDX56,UBA P2L,NOP56,HNRNPDL,KHDRBS1,HNRNPD,LRPPRC,EI F5A,SUPT6H,RANBP2,NOLC1,SNRNP200,ABCF1,NSU N2,HSPD1,YBX1,LIN28B,EIF5B,RBM3,SF3A1,MPHO SPH10,GDI2,PES1,MYH10,IPO5,EP300,DAZAP1,AL YREF,RRP1B,CLUH,SRRT,PABPC1,PRRC2C,SERBP1,AHNAK,PRPF8,SF3B3,THRAP3,HNRNPF,NPM1,ETF1,SON,WDR43,TFRC,NQO1,EIF4G1,TRIM28,U2AF2,BC LAF1,SRSF2,HSP90AA1,CAPRIN1,TRMT1,NOP58,HN RNPA2B1,LARP1,PTBP1,CCAR1,DDX21,SFPQ,PABPC4,HNRNPM,SRSF3,EIF3A,MYC,IGF2BP1,KHSRP,FUS,ILF3,FASN,DHX9,HNRNPU,NCL,HSPA8</p> |
| GO:1901363 | heterocyclic compound binding | 3.820583544160709e-54 | <p>HRAS,NOP14,TXK,ACSF3,SNRPB,MITF,JMJD1C,MIS18BP1,DAP3,RBM48,PPAN,MSH3,TRIP13,CHTOP,ER AL1,ZNF274,SEC23IP,DNAJA2,PRPF38B,KMT2B,MM AB,RNASEH1,SREK1,MACROH2A1,BRD9,FBRSL1,MUS81,NOL11,MTA2,RAD51C,UTP3,CWC22,UBE2Q1,MTR EX,PHF5A,NACA,POLR1C,MED6,SRP72,METTL3,EZH2,TCF20,FES,RAB10,DCLRE1C,NOC4L,MFAP1,ULK3,DNM1L,LRRFIP1,GPATCH3,RHEB,H4C5,SMG5,BRD4,RRP9,MRPL1,ZNF581,ZNF74,MRPL11,AHCTF1,RPU SD4,DENR,HROB,MRPS30,MED1,NVL,KIF26B,HNRNP L,MYO16,ATP11A,WDR46,MCM10,EFTUD2,CHRA1,C RCP,GPN2,KMT2D,TAF4B,PQBP1,AIFM2,PSPC1,CEP350,POLDIP2,PSMC3,ZBTB40,TIMM44,DHX38,ADNP</p>                                                                                                                                                                                                                                                                                                                                                                                                                                                                                                                                                                                                                                                                                                                                                                                                                                                                                                                                                                                                                                                                                                                                                                                                                                                                                                                                                                                                                                                                                                                                                                                                                                                                                                            |

|  |  |  |                                                                                                                                                                                                                                                                                                                                                                                                                                                                                                                                                                                                                                                                                                                                                                                                                                                                                                                                                                                                                                                                                                                                                                                                                                                                                                                                                                                                                                                                                                                                                                                                                                                                                                                                                                                                                                                                                                                                                                                                                                                                                                                                                                                                                                                                                                                                                                                                                                                                                                                                                                                                                                                                                                                                                                                                                                                                                                                                                                                                                                                                                                                                                                                                                                                                                                                               |
|--|--|--|-------------------------------------------------------------------------------------------------------------------------------------------------------------------------------------------------------------------------------------------------------------------------------------------------------------------------------------------------------------------------------------------------------------------------------------------------------------------------------------------------------------------------------------------------------------------------------------------------------------------------------------------------------------------------------------------------------------------------------------------------------------------------------------------------------------------------------------------------------------------------------------------------------------------------------------------------------------------------------------------------------------------------------------------------------------------------------------------------------------------------------------------------------------------------------------------------------------------------------------------------------------------------------------------------------------------------------------------------------------------------------------------------------------------------------------------------------------------------------------------------------------------------------------------------------------------------------------------------------------------------------------------------------------------------------------------------------------------------------------------------------------------------------------------------------------------------------------------------------------------------------------------------------------------------------------------------------------------------------------------------------------------------------------------------------------------------------------------------------------------------------------------------------------------------------------------------------------------------------------------------------------------------------------------------------------------------------------------------------------------------------------------------------------------------------------------------------------------------------------------------------------------------------------------------------------------------------------------------------------------------------------------------------------------------------------------------------------------------------------------------------------------------------------------------------------------------------------------------------------------------------------------------------------------------------------------------------------------------------------------------------------------------------------------------------------------------------------------------------------------------------------------------------------------------------------------------------------------------------------------------------------------------------------------------------------------------------|
|  |  |  | <p> 2, GART, NT5C3A, NOP16, ARID2, DDX23, PATZ1, TRNT1, RNPS1, LHX4, ZNF512B, RBL1, RPUSD1, RBM45, NOSIP, HNRNPH1, RAB7A, ZNF512, DNMT1, LYL1, PPP5C, BAP1, JRK, DUS1L, SUB1, DHX16, TOP2B, LYAR, LRWD1, EIF4EBP2, CCT6A, KAT7, CLTC, EEF2, AFG3L2, CCT8, KIF5B, FUBP3, IMP4, BCCIP, FAM120A, RNF40, CMPK1, NONO, MEF2C, TCF3, MAF1, CLSPN, NOL9, MVK, PLK4, SLK, PRPF6, ZC3H4, PEBP1, ZNF26, ZNF24, GSPT1, GRSF1, NXF1, ACTR8, PSMC5, STK35, ZC3HAV1, HNRNPA3, MAPK1, EEF1D, POLR1E, ATP2A2, ABCF3, ABT1, R3HDM1, HBG1, CERS2, DHX33, NCOA5, DHX15, UIMC1, PUM1, MTOR, DHX30, UTP18, IKZF3, CPSF3, SPEN, GOT2, SMARCA5, SF3A2, H2AW, EIF3D, ZNF45, TFAP4, NIFK, HNRNPA0, ZNF131, SBNO1, ZNF431, NAP1L4, DHFR, MTDH, HSPA9, MCCC1, TCF7L2, ZNF239, SRRM2, MRPL15, GMPS, ASCC3, UBE2L3, THOC1, PSMC2, SETMAR, RPTOR, PPIR10, MRPS35, TMEM18, CSTF2, TNF, RAVER1, GRPEL1, EIF4B, SAMS1, WDR33, NIP7, IGF2BP3, NOL7, EL2, PUM2, H2AZ2, WDR3, MT-<br/> TL1, SSBP3, SNRPA, ZNF586, BACH1, DDX10, RBM10, SETX, NFILZ, TRMT2A, STK24, APEX1, BPTF, RIOK2, NAA15, ARID1A, PPP1CC, ZC3H14, RAB35, SRSF10, AKAP8, SBDS, RCC1, C1QBP, VPS72, ZNF587B, STK25, SRSF8, PAK2, PRPF4, KTN1, PRMT5, PCBP2, ADD1, TRMT6, RBMX, BAZ1A, MCCC2, MLLT3, RAD23B, TAF4, RBM14, RBM8A, KDM3B, BOP1, ZNF326, API5, UCK2, TUBB, FEN1, ZNF282, DYRK1A, TFDP2, GTF3C6, SLBP, NUCKS1, UTP25, TMPO, PRPF38A, SSB, GNL3L, DNTTIP2, CYB5B, IB57, RNU6-322P, NSRP1, MT-<br/> TF, TFIP11, STRBP, EIF3G, DHX29, BRCA2, POLR2D, EIF3M, NIN, RBM42, ZFX, ZC3H7B, ACLY, SNRPD1, PAN3, ZC3H18, FASTKD2, RABL6, TCOF1, XRCC2, ZNF75A, SMARCB1, TRIR, CREBBP, EXOSC3, WBP11, KIFC3, EPRS1, LSM14A, NUP98, HNRNPUL1, CNOT1, LYN, ASH1L, LRC59, GEMIN5, PLAGL2, BTF3, POLR1B, DDX42, ELOF1, WDR6, NFYC, SF1, PELP1, ZCCHC14, XRN2, EZR, TRUB2, DDX20, DDX51, ELOA, TAF9, YWHAG, ELAVL1, UTP15, VCP, RYBP, SAFB2, GBP2, DHX34, PSIP1, CSTB, CSNK1G2, DCAF13, RBM12, STIP1, CDK4, PNO1, POLR3C, THG1L, RBM25, SETD1A, RRP12, SMC1A, AGO2, E2F4, FOXRED2, G3BP1, GNL2, RRP36, MCM6, AQR, DHCR7, CLCN6, ARL8B, DDX18, ADNP, UBA2, NFKB1, UBTf, ZNF622, CHD7, RBM15B, HNRNPA1, GAR1, RRS1, PPARGC1B, MAGOH, PBRM1, CTCF, HHEX, ANKRD17, HNRNPR, RRM1, PI4KA, ELF1, ZNF614, NSD1, RSL1D1, CCT3, CDK7, H3-3B, RNF138, SETD1B, PKM, FOXK2, KIF2A, HMGB1, ATA3B, BZW1, GNAQ, CANX, YY1, NOL8, MLLT10, IRAK1, PIUS7, PIK3C2B, IP6K1, NAT10, TRMT10C, METAP2, SNU13, SRSF6, EP400, MTHFD1, ADSS2, SART1, CEBPZ, MCP2, CSDE1, MBNL1, SKI, PRKAR2B, TKT, DDX54, N4BP2, TARDBP, LARP4, XRCC6, PNN, RPL22, PCNA, MBD1, CSNK2A2, UPF2, DIAPH1, DDX3X, LBR, HDGF, ZNF789, EIF4G2, MCM2, JUND, PFAS, CHEK1, AATF, ZMPSTE24, UBAP2, SLC25A5, SLTM, CYP3A5, URB1, DNAJC21, UBP1, POLE, PPIP5K2, EXOSC9, CSK, POLR2A, CCDC86, DNAJA1, DYNC1H1, TSR1, RBM19, SLC19A1, XPO1, PPIA, PRPF3, CLCN7, TPR, SRSF7, UTP20, ZFP36L2, SF3B4, STK17A, PPRC1, EBNA1BP2, ZFR, TFB2M, UBE2N, BAZ1B, NRIP1, MRT04, TLK1, GFM1, MYBBP1A, DDB1, BACH2, PITX1, GTF3C4, LRRC47, ASXL2, TCP1, RALY, ENO1, CCT5, FUBP1, POLE3, CDK6, CDC5L, CHD3, NUP153, RAN, BEND3, UBC, ZNF787, TFAM, HSPA4, AK2, MSH2, CDK12, ZBTB2, DDO1, GLYR1, KMT2A, MCM3, NOSTRIN, GRW1, PAICS, H4C8, CERS6, PRDX1, TNPO1, GATAD2A, DKC1, DDX1, H2BC12, THUMP1, CTSP1, EWSR1, DDX49, CASC3, SSRP1, ARID1B, KPNB1, CPSF7, RRP1, TXNRD1, </p> |
|--|--|--|-------------------------------------------------------------------------------------------------------------------------------------------------------------------------------------------------------------------------------------------------------------------------------------------------------------------------------------------------------------------------------------------------------------------------------------------------------------------------------------------------------------------------------------------------------------------------------------------------------------------------------------------------------------------------------------------------------------------------------------------------------------------------------------------------------------------------------------------------------------------------------------------------------------------------------------------------------------------------------------------------------------------------------------------------------------------------------------------------------------------------------------------------------------------------------------------------------------------------------------------------------------------------------------------------------------------------------------------------------------------------------------------------------------------------------------------------------------------------------------------------------------------------------------------------------------------------------------------------------------------------------------------------------------------------------------------------------------------------------------------------------------------------------------------------------------------------------------------------------------------------------------------------------------------------------------------------------------------------------------------------------------------------------------------------------------------------------------------------------------------------------------------------------------------------------------------------------------------------------------------------------------------------------------------------------------------------------------------------------------------------------------------------------------------------------------------------------------------------------------------------------------------------------------------------------------------------------------------------------------------------------------------------------------------------------------------------------------------------------------------------------------------------------------------------------------------------------------------------------------------------------------------------------------------------------------------------------------------------------------------------------------------------------------------------------------------------------------------------------------------------------------------------------------------------------------------------------------------------------------------------------------------------------------------------------------------------------|



|            |                                 |                       |                                                                                                                                                                                                                                                                                                                                                                                                                                                                                                                                                                                                                                                                                                                                                                                                                                                                                                                                                                                                                                                                                                                                                                                                                                                                                                                                                                                                                                                                                                                                                                                                                                                                                                                                                                                                                                                        |
|------------|---------------------------------|-----------------------|--------------------------------------------------------------------------------------------------------------------------------------------------------------------------------------------------------------------------------------------------------------------------------------------------------------------------------------------------------------------------------------------------------------------------------------------------------------------------------------------------------------------------------------------------------------------------------------------------------------------------------------------------------------------------------------------------------------------------------------------------------------------------------------------------------------------------------------------------------------------------------------------------------------------------------------------------------------------------------------------------------------------------------------------------------------------------------------------------------------------------------------------------------------------------------------------------------------------------------------------------------------------------------------------------------------------------------------------------------------------------------------------------------------------------------------------------------------------------------------------------------------------------------------------------------------------------------------------------------------------------------------------------------------------------------------------------------------------------------------------------------------------------------------------------------------------------------------------------------|
|            |                                 |                       | <p>ZNF33B,HNRNPAB,KAT6A,ATAD3A,ARF6,USP36,RBBP4,SAFB,NCBP1,HEATR1,CCT2,HSP90AB1,EIF3B,DIUS3L,PA2G4,HNRNPK,SMG1,DHX37,SMARCA4,CYP20A1,EIF3J,PRKDC,YES1,ZNF121,TRA2B,PRMT1,HNRNPC,SF3A3,SUPT16H,HMGA1,FARSA,CELF1,RBML1,XRCC5,DDX5,UTP4,DEK,LMNB1,DDX46,EIF4A3,ACTG1,SURF6,DDX39A,DDX56,CIZ1,CDT1,UBAP2L,NOP56,HNRNPDL,KHDRBS1,HNRNPD,LRPPRC,EIF5A,SUPT6H,RANBP2,DNAJB6,NOLC1,SNRNP200,SREBF2,ABCF1,ACACA,MGA,NSUN2,HSPD1,PIM2,GAPDH,YBX1,LIN28B,EIF5B,RBM3,PGD,SF3A1,MPHOSPH10,GDI2,PES1,MYH10,IPO5,RREB1,HSPH1,EP300,TGFBF1,DAZAP1,ALYREF,RRP1B,CLUH,FOSB,SRRT,PABPC1,PRRC2C,SERBP1,ATP13A3,AHNAK,PRPF8,SF3B3,THRAPP3,HNRNPF,NPM1,ETF1,SON,WDR43,TFR3,RUNX1,NQO1,EIF4G1,TRIM28,U2AF2,NR2F2,BCLAF1,SRSF2,HSP90AA1,MDN1,NFATC3,ZNF521,CAPRIN1,TRMT1,SQLE,MCM4,TRIM24,NOP58,HNRNPA2B1,KIF1A,BAG1,LARP1,HBZ,PTBP1,CCAR1,MAT2A,DDX21,SFPQ,PABPC4,HNRNPM,POLR1A,KCNH2,SRSF3,EIF3A,MCM7,SMARCC1,MYC,SET,IGF2BP1,FOS,HMGC,MYB,KHSRP,ZEB2,FUS,ILF3,FASN,GLUL,ACTB,DHX9,HNRNPU,MCM5,NCL,EGR1,DHCR24,HSPA8</p>                                                                                                                                                                                                                                                                                                                                                                                                                                                                                                                                                                                                                                                                                                                                                                                                                                                    |
| GO:0097159 | organic cyclic compound binding | 6.396976601369362e-54 | <p>HRAS,NOP14,TKX,ACSF3,SNRBP,MITF,JMJD1C,MIS18BP1,DAP3,RBM48,PPAN,MSH3,TRIP13,CHTOP,ERAL1,ZNF274,SEC23IP,DNAJA2,PRPF38B,KMT2B,MMAB,RNASEH1,SREK1,MACROH2A1,BRD9,FBRSL1,MUS81,NOL11,MTA2,RAD51C,UTP3,CWC22,UBE2Q1,MTRX,PHF5A,NACA,POLR1C,MED6,SRP72,METTL3,EZH2,TCF20,FES,RAB10,DCLRE1C,NOC4L,MFAP1,ULK3,DNM1L,LRRFIP1,GPATCH3,RHEB,H4C5,SMG5,BRD4,RRP9,MRPL1,ZNF581,ZNF74,MRPL11,AHCTF1,RPUSD4,DENR,HROB,MRPS30,MED1,NVL,KIF26B,HNRNPL,MYO16,ATP11A,WDR46,MCM10,EFTUD2,CHRA1,CRCP,GNP2,KMT2D,TAF4B,PQBP1,AIFM2,PSPC1,CEP350,POLDIP2,PSMC3,ZBTB40,TIMM44,DHX38,ADNP2,GART,NT5C3A,NOP16,ARID2,DDX23,PATZ1,TRNT1,RNPS1,LHX4,ZNF512B,RBL1,RPUSD1,RBM45,NOSIP,HNRNPH1,RAB7A,ZNF512,DNMT1,LYL1,PPP5C,BAP1,JRK,DUS1L,SUB1,DHX16,TP2B,LYAR,LWRD1,EIF4EBP2,CCT6A,KAT7,CLTC,EEF2,AFG3L2,CCT8,KIF5B,FUBP3,IMP4,BCCIP,FAM120A,RNF40,CMPK1,NONO,MEF2C,TCF3,MAF1,CLSPN,NOL9,MVK,PLK4,SLK,PRPF6,ZC3H4,PEBP1,ZNF26,ZNF24,GSPT1,GRSF1,NXF1,ACTR8,PSMC5,STK35,ZC3HAV1,HNRNPA3,MAPK1,STAR,EEF1D,POLR1E,ATP2A2,ABCF3,ABT1,R3HDM1,HBG1,CERS2,DHX33,NCOA5,DHX15,UIMC1,PUM1,MTOR,DHX30,UTP18,IKZF3,CPSF3,SPEN,GOAT2,VDAC1,SMARCA5,SF3A2,H2AW,EIF3D,ZNF45,TFAP4,NIFK,HNRNPA0,ZNF131,SBNO1,ZNF431,NAP1L4,DHFR,MTDH,HSPA9,MCCC1,TCF7L2,ZNF239,SRRM2,MRPL15,GMPS,ASCC3,UBE2L3,THOC1,PSMC2,SETMAR,RPTOR,PPP1R10,MRPS35,TMEM18,CSTF2,TNF,RAVER1,GRPEL1,EIF4B,SAMSN1,WDR33,NIP7,IGF2BP3,NOL7,ELL2,PUM2,H2AZ2,WDR3,MT-TL1,SSBP3,SNRPA,ZNF586,BACH1,DDX10,RBM10,SETX,NFILZ,TRMT2A,STK24,APEX1,BPTF,RIOK2,NAA15,ARID1A,PPP1CC,ZC3H14,RAB35,SRSF10,AKAP8,SBDS,RCC1,C1QBP,VPS72,ZNF587B,STK25,SRSF8,PAK2,PRPF4,KTN1,PRMT5,PCBP2,ADD1,TRMT6,RBMX,BAZ1A,MCCC2,MLLT3,RAD23B,TAF4,RBM14,RBM8A,KDM3B,BOP1,ZNF326,API5,UCK2,TUBB,FEN1,ZNF282,DYRK1A,TFDP2,GTFC6,SLBP,NUCKS1,UTP25,TMPO,PRPF38A,SSB,GNL3L,DNTTIP2,CYB5B,IBA57,RNU6-322P,NSRP1,MT-TF,TFIP11,STRBP,EIF3G,DHX29,BRCA2,POLR2D,E</p> |

|            |              |                       |                                                                                                                                                                                                                                                                                                                                                                                                                                                                                                                                                                                                                                                                                                                                                                                                                                                                                                                                                                                                                                                                                                                                                                                                                                                                                                                                                                                                                                                                                                                                                                                                                                                                                                                                                                                                                                                                                                                                                                                                                                                                                                                                                                                                                                                                                                                                                                                                                                                                                                                                                                                             |
|------------|--------------|-----------------------|---------------------------------------------------------------------------------------------------------------------------------------------------------------------------------------------------------------------------------------------------------------------------------------------------------------------------------------------------------------------------------------------------------------------------------------------------------------------------------------------------------------------------------------------------------------------------------------------------------------------------------------------------------------------------------------------------------------------------------------------------------------------------------------------------------------------------------------------------------------------------------------------------------------------------------------------------------------------------------------------------------------------------------------------------------------------------------------------------------------------------------------------------------------------------------------------------------------------------------------------------------------------------------------------------------------------------------------------------------------------------------------------------------------------------------------------------------------------------------------------------------------------------------------------------------------------------------------------------------------------------------------------------------------------------------------------------------------------------------------------------------------------------------------------------------------------------------------------------------------------------------------------------------------------------------------------------------------------------------------------------------------------------------------------------------------------------------------------------------------------------------------------------------------------------------------------------------------------------------------------------------------------------------------------------------------------------------------------------------------------------------------------------------------------------------------------------------------------------------------------------------------------------------------------------------------------------------------------|
|            |              |                       | <p>IF3M,NIN,RBM42,ZFX,ZC3H7B,ACLY,SNRPD1,PAN3,ZC3H18,FASTKD2,RABL6,TCOF1,XRCC2,ZNF75A,S MARCB1,TRIR,CREBBP,EXOSC3,WBP11,KIFC3,EPRS1,INSIG1,LSM14A,NUP98,HNRNPUL1,CNOT1,LYN,ASH1L,LRRCS59,GEMIN5,PLAGL2,BTF3,POLR1B,DDX42,ELOF1,WDR6,NFYC,SF1,PELP1,ZCCHC14,XRN2,EZR,TRUB2,DDX20,DDX51,ELOA,TAF9,YWHAG,ELAVL1,UTP15,VCP,RYBP,SAFB2,GBP2,DHX34,PSIP1,CS TB,CSNK1G2,DCAF13,RBM12,STIP1,CDK4,PNO1,PO LR3C,THG1L,RBM25,SETD1A,RRP12,SCAP,SMC1A,AGO2,E2F4,FOXRED2,G3BP1,GNL2,RRP36,MCM6,AQR,DHCR7,CLCN6,ARL8B,DDX18,ADNP,UBA2,NFKB1,UBTF,ZNF622,CHD7,RBM15B,HNRNPA1,GAR1,RRS1,PARGC1B,MAGOH,PBRM1,CTCF,HHEX,ANKRD17,HNRNPR,RRM1,PI4KA,ELF1,ZNF614,NSD1,RSL1D1,CCT3,CDK7,H3-3B,RNF138,SETD1B,PKM,FOKK2,KIF2A,HMGB1,ATAD3B,BZW1,GNAQ,CANX,YY1,NOL8,MLLT10,IRAK1,PUS7,PIK3C2B,IP6K1,NAT10,TRMT10C,METAP2,SNU13,SRSF6,EP400,MTHFD1,ADSS2,SART1,CEBPZ,MECP2,CSDE1,MBNL1,SKI,PRKAR2B,TKT,DDX54,N4BP2,TARDBP,LARP4,XRCC6,PNN,RPL22,PCNA,MBD1,C SNK2A2,UPF2,DIAPH1,DDX3X,LBR,HDGF,ZNF789,EIF4G2,MCM2,JUND,PFAS,CHEK1,AATF,ZMPSTE24,UBAP2,SLC25A5,SLTM,CYP3A5,URB1,DNAJC21,UBP1,POLE,PIIP5K2,EXOSC9,CSK,POLR2A,CCDC86,DNAJA1,DYNC1H1,TSR1,RBM19,SLC19A1,XPO1,PPIA,PRPF3,CLCN7,TPR,SRSF7,UTP20,ZFP36L2,SF3B4,STK17A,PPRC1,EBNA1BP2,ZFR,TFB2M,UBE2N,BAZ1B,NRIP1,MRT04,TLK1,GFM1,MYBBP1A,DDDB1,BACH2,PITX1,GTFC3C4,LRRC47,ASXL2,TCP1,RALY,ENO1,CCT5,FUBP1,POLE3,CDK6,CDC5L,CHD3,NUP153,RAN,BEND3,UBC,ZNF787,TFAM,HSPA4,AK2,MSH2,CDK12,ZBTB2,DIDO1,GLYR1,KMT2A,MCM3,NOSTRIN,GRWD1,PAICS,H4C8,CERS6,PRDX1,TNPO1,GATAD2A,DKC1,DDX1,H2BC12,THUMP1,CTPS1,EWSR1,DDX49,CASC3,SSRP1,ARID1B,KPNB1,CPSF7,RRP1,TXNRD1,ZNF33B,HNRNPAB,KAT6A,ATAD3A,ARF6,USP36,RBBP4,SAFB,NCBP1,HEATR1,CCT2,HSP90AB1,EIF3B,DUS3L,PA2G4,HNRNPK,SMG1,DHX37,SMARCA4,CYP20A1,EIF3J,PRKDC,YES1,ZNF121,TRA2B,PRMT1,HNRNPC,SF3A3,SUPT16H,HMGA1,FARSA,CELF1,RBMXL1,XRCC5,DDX5,UTP4,DEK,LMNB1,DDX46,EIF4A3,ACTG1,SURF6,DDX39A,DDX56,CIZ1,CDT1,UBAP2L,NOP56,HNRNPDL,KHDRBS1,HNRNPD,LRRPRC,EIF5A,SUPT6H,RANBP2,DNAJB6,NOLC1,SNRNP200,SREBF2,ABCF1,ACACA,MGA,NSUN2,HSPD1,PIM2,GAPDH,YBX1,LIN28B,EIF5B,RBM3,PGD,SF3A1,MPHOSPH10,GDI2,PES1,MYH10,IPO5,RREB1,HSPH1,EP300,TGFBR1,DAZAP1,ALYREF,RRP1B,CLUH,FOSB,SRRT,PABPC1,PRRC2C,SERBP1,ATP13A3,AHNAK,PRPF8,SF3B3,THRAPP3,HNRNPFP,NPM1,ETF1,SON,WDR43,TFRC,RUNX1,NQO1,EIF4G1,TRIM28,U2AF2,NR2F2,BCLAF1,SRSF2,HSP90AA1,MDN1,NFATC3,ZNF521,CAPRIN1,TRMT1,SQLE,MCM4,TRIM24,NOP58,HNRNPA2B1,KIF1A,BAG1,LARP1,HBZ,PTBP1,CCAR1,MAT2A,DDX21,SFPQ,PABPC4,HNRNPM,POLR1A,KCNH2,SRSF3,EIF3A,MCM7,SMARCC1,MYC,SET,IGF2BP1,FOS,HMGCR,MYB,KHSRP,ZEB2,FUS,ILF3,FASN,GLUL,ACTB,DHX9,HNRNPU,MCM5,NCL,EGR1,DHCR24,HSPA8</p> |
| GO:0003729 | mRNA binding | 7.544244813888879e-34 | <p>CHTOP,METTL3,DENR,HNRNPPL,RNPS1,JRK,FUBP3,RNF40,GRSF1,NXF1,HNRNPA3,DHX33,PUM1,SPEN,EIF3D,HNRNPA0,DHFR,SRRM2,CSTF2,RAVER1,IGF2BP3,PUM2,MT-TL1,C1QBP,PCBP2,RBMX,RBM14,RBM8A,SLBP,SSB,NSRP1,MT-</p>                                                                                                                                                                                                                                                                                                                                                                                                                                                                                                                                                                                                                                                                                                                                                                                                                                                                                                                                                                                                                                                                                                                                                                                                                                                                                                                                                                                                                                                                                                                                                                                                                                                                                                                                                                                                                                                                                                                                                                                                                                                                                                                                                                                                                                                                                                                                                                                         |

|            |                   |                       |                                                                                                                                                                                                                                                                                                                                                                                                                                                                                                                                                                                                                                                                                                                                                                                                                                                                                                                                                                                                                                                                                                                                                                                                                                                                                                                                                                                                                                                                                                                                                                                                                                                                                                                                                                                                                                                                                                                                                                                                            |
|------------|-------------------|-----------------------|------------------------------------------------------------------------------------------------------------------------------------------------------------------------------------------------------------------------------------------------------------------------------------------------------------------------------------------------------------------------------------------------------------------------------------------------------------------------------------------------------------------------------------------------------------------------------------------------------------------------------------------------------------------------------------------------------------------------------------------------------------------------------------------------------------------------------------------------------------------------------------------------------------------------------------------------------------------------------------------------------------------------------------------------------------------------------------------------------------------------------------------------------------------------------------------------------------------------------------------------------------------------------------------------------------------------------------------------------------------------------------------------------------------------------------------------------------------------------------------------------------------------------------------------------------------------------------------------------------------------------------------------------------------------------------------------------------------------------------------------------------------------------------------------------------------------------------------------------------------------------------------------------------------------------------------------------------------------------------------------------------|
|            |                   |                       | <p>TF, LSM14A, NUP98, GEMIN5, SF1, ELAVL1, RBM25, AGO2, G3BP1, AQR, CLCN6, RBM15B, HNRNPA1, HNRNPR, RSL1D1, PKM, SRSF6, MECP2, TARDBP, LARP4, DDX3X, EIF4G2, EXOSC9, TPR, ZFP36L2, CCT5, FUBP1, CASC3, CPSF7, HNRNPAB, NCBP1, HNRNPK, TRA2B, HNRNPC, CELF1, DDX5, EIF4A3, KHDRBS1, HNRNPD, LRPPRC, YBX1, LIN28B, RBM3, MYH10, DAZAP1, CLUH, PABPC1, SERBP1, ETF1, EIF4G1, BCLAF1, HNRNPA2B1, LARP1, PTBP1, PABPC4, HNRNPM, EIF3A, MYC, IGF2BP1, KHSRP, FUS, ILF3, DHX9, HNRNPU, NCL</p>                                                                                                                                                                                                                                                                                                                                                                                                                                                                                                                                                                                                                                                                                                                                                                                                                                                                                                                                                                                                                                                                                                                                                                                                                                                                                                                                                                                                                                                                                                                    |
| GO:0003682 | chromatin binding | 5.204156114683076e-26 | <p>MITF, JMJD1C, ZNF274, MACROH2A1, MTA2, CBX3, EZH2, NCAPH2, BRD4, MED1, STAG2, PATZ1, RBL1, STAG1, DNMT1, BAP1, GTF2H1, TOP2B, LRWD1, NONO, ZC3H4, PCLAF, NCOA5, DHX30, IKZF3, SMARCA5, PRMT6, TSPYL5, SBNO1, ZNF431, NAP1L4, MCMBP, APEX1, ARID1A, RCC1, TICRR, RBMX, MLLT3, KDM3B, CHAF1A, NUCKS1, WAC, ZFX, PAF1, SMARCB1, CREBBP, NUP98, ASH1L, PELP1, WDR82, SMC1A, E2F4, ADNP, NFKB1, UBTf, BRD2, CHD7, PBRM1, CTCF, ANKRD17, NSD1, H3-3B, SMARCD1, YY1, MLLT10, EP400, MECP2, PCNA, NCA PH, HCFC1, POLE, NUP62, TPR, ASXL2, CENPF, POLE3, CHD3, RAN, TFAM, MSH2, GLYR1, KMT2A, GRWD1, DDX1, SSRP1, ARID1B, RBBP4, SAFB, SMARCA4, HNRNPC, SUP T16H, HMGA1, DDX5, CDT1, HNRNPD, SUPT6H, YBX1, EP300, NPM1, CITED2, TRIM28, TRIM24, SFPQ, POLR1A, SMARCC1, SET, FOS, FUS, ACTB, DHX9, HNRNPU, EGR1</p>                                                                                                                                                                                                                                                                                                                                                                                                                                                                                                                                                                                                                                                                                                                                                                                                                                                                                                                                                                                                                                                                                                                                                                                               |
| GO:0003677 | DNA binding       | 2.244036499431702e-23 | <p>MITF, JMJD1C, MIS18BP1, MSH3, CHTOP, ZNF274, KMT2B, MACROH2A1, MUS81, MTA2, RAD51C, PHF5A, NACA, POLR1C, MED6, EZH2, TCF20, DCLRE1C, LRRFIP1, H4C5, SMG5, BRD4, ZNF581, ZNF74, AHCTF1, HROB, MED1, HNRNPL, MCM10, CHRA1, KMT2D, TAF4B, PQBP1, AIFM2, CEP350, POLDIP2, ZBTB40, ADNP2, ARID2, PATZ1, LHX4, ZNF512B, RBL1, ZNF512, DNMT1, LYL1, BAP1, JRK, SUB1, TOP2B, LYAR, LRWD1, KAT7, FUBP3, NONO, MEFC2, TCF3, MAF1, CLSPN, ZNF26, ZNF24, MAPK1, EEFD1, POLR1E, ABT1, CERS2, DHX33, UIMC1, MTOR, IKZF3, SPEN, SMARCA5, H2AW, ZNF45, TFAP4, ZNF131, SBN O1, ZNF431, TCF7L2, ZNF239, THOC1, SETMAR, RPTOR, PPP1R10, TMEM18, TNF, ELL2, H2AZ2, SSBP3, SNRPA, ZNF586, BACH1, SETX, NFILZ, APEX1, BPTF, ARID1A, AKAP8, RCC1, VPS72, ZNF587B, PRMT5, PCBP2, RBMX, BAZ1A, MLLT3, RAD23B, TAF4, KDM3B, ZNF326, FEN1, ZNF282, TFDP2, GTF3C6, NUCKS1, TMPO, SSB, STRBP, BRCA2, ZFX, XRCC2, ZNF75A, SMARCB1, CREBBP, WBP11, LSM14A, ASH1L, PLAGL2, POLR1B, NFYC, XRN2, DD X20, TAF9, RYBP, SAFB2, PSIP1, POLR3C, SMC1A, AGO2, E2F4, G3BP1, MCM6, ADNP, NFKB1, UBTf, CHD7, HNRNPA1, PBRM1, CTCF, HHEX, ELF1, ZNF614, NSD1, H3-3B, RNF138, FOXK2, HMGB1, YY1, MLLT10, EP400, MEC P2, SKI, TARDBP, XRCC6, PNN, PCNA, MBD1, UPF2, DDX3X, LBR, HDGF, ZNF789, MCM2, JUND, ZMPSTE24, SLTM, UBP1, POLE, POLR2A, ZFR, NRIP1, MYBBP1A, DDB1, BACH2, PITX1, GTF3C4, ASXL2, ENO1, FUBP1, POLE3, CDC5L, CHD3, NUP153, BEND3, ZNF787, TFAM, MSH2, ZBTB2, GLYR1, KMT2A, MCM3, NOSTRIN, GRWD1, H4C8, CERS6, GATAD2A, DDX1, H2BC12, SSRP1, ARID1B, ZNF33B, HNRNPAB, KAT6A, RBBP4, SAFB, HNRNPK, SMG1, SMARCA4, PRKDC, ZNF121, PRMT1, HNRNPC, HMGA1, XRCC5, DEK, LMNB1, SURF6, CDT1, HNRNPD, KHDRBS1, HNRNPD, LRPPRC, SUPT6H, DNABJ6, SREBF2, MGA, HSPD1, YBX1, LIN28B, RREB1, EP300, FOSB, SRRT, THRAP3, NPM1, SON, RUNX1, TRIM28, NR2F2, BCLAF1, NFATC3, ZNF521, MCM4, TRIM24, HNRNPA2B1, PTBP1, CCAR1, SFPQ, POLR1A, KCNH2, MCM7, SMARCC1, MYC, SET, FOS, MYB, KHSRP, ZEB2, FUS, ILF3, ACTB, DHX9, HNRNPU, MCM5, NCL, EGR1</p> |

|            |                                              |                        |                                                                                                                                                                                                                                                                                                                                                                                                                                                                                                                                                                                                                                                                                                                         |
|------------|----------------------------------------------|------------------------|-------------------------------------------------------------------------------------------------------------------------------------------------------------------------------------------------------------------------------------------------------------------------------------------------------------------------------------------------------------------------------------------------------------------------------------------------------------------------------------------------------------------------------------------------------------------------------------------------------------------------------------------------------------------------------------------------------------------------|
| GO:0140640 | catalytic activity, acting on a nucleic acid | 3.729442806839756e-18  | MSH3, RNASEH1, MUS81, RAD51C, MTREX, POLR1C, METTL3, DCLRE1C, CHRA1, CRCP, DHX38, NT5C3A, DDX23, TRNT1, DNMT1, DUS1L, SUB1, DHX16, TOP2B, TSR3, NOB1, DHX33, DHX15, DHX30, CPSF3, SMARCA5, RSF1, ASSC3, SETMAR, TRMT61A, DDX10, SETX, TRMT2A, METTL8, APEX1, BPTF, FEN1, TRMO, DHX29, PAN3, XRCC2, EXOSC3, EPRS1, CNOT1, POLR1B, DDX42, XRN2, DDX20, DDX51, DHX34, POLR3C, THG1L, AGO2, G3BP1, MCM6, AQR, DDX18, CHD7, CDK7, TRMT10C, EP400, DDX54, NBP2, XRCC6, PCNA, DDX3X, MCM2, POLE, EXOSC9, POLR2A, TFB2M, LRR47, POLE3, CHD3, MSH2, MCM3, DKC1, DX1, DDX49, RBBP4, DUS3L, DHX37, SMARCA4, HMGA1, FARSA, XRCC5, DDX5, DDX46, EIF4A3, DDX39A, DDX56, SNRNP200, NSUN2, TRMT1, MCM4, DDX21, POLR1A, MCM7, DHX9, MCM5 |
| GO:0140657 | ATP-dependent activity                       | 3.762752166632928e-18  | ACSF3, MSH3, TRIP13, RAD51C, MTREX, NVL, KIF26B, ATP11A, PSMC3, DHX38, DDX23, SUB1, DHX16, TOP2B, CCT6A, AFG3L2, CCT8, KIF5B, PSMC5, ATP2A2, DHX33, DHX15, DHX30, SMARCA5, RSF1, HSPA9, ASSC3, PSMC2, DDX10, SETX, BPTF, ATP6V1G1, DHX29, XRCC2, KIFC3, DDX42, DDX20, DDX51, VCP, DHX34, SMC1A, G3BP1, SAE1, MCM6, AQR, DDX18, ATP6V0D1, UBA2, CHD7, CCT3, CDK7, KIF2A, ATAD3B, EP400, DDX54, XRCC6, DDX3X, MCM2, DYNC1H1, TCP1, CCT5, CHD3, HSPA4, MSH2, MCM3, DDX1, DDX49, ATP6V0A1, ATAD3A, RBBP4, CCT2, HSP90AB1, DHX37, SMARCA4, XRCC5, DDX5, DDX46, EIF4A3, DDX39A, DDX56, SNRNP200, HSPD1, ATP6V1C1, MYH10, HSPH1, ATP13A3, HSP90AA1, MDN1, MCM4, KIF1A, DDX21, MCM7, DHX9, MCM5, HSPA8                          |
| GO:0016887 | ATP hydrolysis activity                      | 2.0089993144624836e-17 | TRIP13, MTREX, NVL, ATP11A, PSMC3, DHX38, DDX23, DHX16, CCT6A, AFG3L2, CCT8, KIF5B, PSMC5, ATP2A2, DHX33, DHX15, DHX30, SMARCA5, HSPA9, ASSC3, PSMC2, DDX10, ATP6V1G1, DHX29, DDX42, DDX20, DDX51, VCP, DHX34, SMC1A, G3BP1, MCM6, AQR, DDX18, CHD7, CCT3, KIF2A, ATAD3B, DDX54, DDX3X, TCP1, CCT5, CHD3, MSH2, MCM3, DDX1, DDX49, ATAD3A, CCT2, HSP90AB1, DHX37, SMARCA4, DDX5, DDX46, EIF4A3, DDX39A, DDX56, SNRNP200, HSPD1, ATP13A3, HSP90AA1, MDN1, MCM4, KIF1A, DDX21, MCM7, DHX9, MCM5, HSPA8                                                                                                                                                                                                                    |
| GO:0004386 | helicase activity                            | 1.6301182781795197e-16 | MTREX, DHX38, DDX23, SUB1, DHX16, DHX33, DHX15, DHX30, SMARCA5, ASSC3, DDX10, SETX, DHX29, DDX42, DDX20, DDX51, DHX34, G3BP1, MCM6, AQR, DDX18, CHD7, EP400, DDX54, XRCC6, DDX3X, MCM2, CHD3, MCM3, DX1, DDX49, DHX37, SMARCA4, XRCC5, DDX5, DDX46, EIF4A3, DDX39A, DDX56, SNRNP200, MCM4, DDX21, MCM7, DHX9, MCM5                                                                                                                                                                                                                                                                                                                                                                                                      |
| GO:0008134 | transcription factor binding                 | 3.0595870923560274e-16 | JMJD1C, MED16, MTA2, MED6, CBX3, EZH2, CTDP1, MED1, TAF4B, MAD2L2, HIF1AN, USP11, SUB1, GTF2H1, LYAR, MEF2C, TCF3, PRPF6, PSMC5, EEF1D, POLR1E, DHX33, MTOR, SPEN, FAF1, MTDH, BAIAP2, TCF7L2, PRAME, RPTOR, APEX1, ARID1A, AKAP8, C1QBP, ADD1, RAD23B, TAF4, TFDP2, NUCKS1, PHB2, SMARCB1, CREBBP, CNOT1, DDX20, MMS19, TAF9, PSIP1, DCAF13, SETD1A, PARGC1B, CTCF, HHEX, NSD1, HMGB1, YY1, SKI, DDX54, PCNA, DDX3X, HDGF, JUND, HCFC1, EXOSC9, DNAJA1, KEAP1, NRIP1, MYBBP1A, PITX1, CENPF, ENO1, TFAM, KAT6A, SMARCA4, PRKDC, WWP2, HMGA1, DDX5, LMO2, TRIP12, NOLC1, EP300, PTMA, THRAP3, HNRNPF, NPM1, CITED2, TRIM24, NOP58, MYC, FOS, ACTB, DHX9, HNRNPU, NCL                                                    |
| GO:0003712 | transcription coregulator activity           | 1.2164672374882798e-15 | JMJD1C, TRIP13, SUPT7L, MED16, MTA2, NACA, MED6, PHB, EZH2, BRD4, MED1, KMT2D, PQBP1, SS18L1, MED29, LIMD1, SUB1, NAB2, KAT7, PRPF6, ABT1, NCOA5, SPEN, RSF1, MTDH, UBE2L3, SSBP3, APEX1, ARID1A, C1QBP, MED15, PRMT5, RBM14, KDM3B, DYRK1A, NUCKS1, COPS2, MED13L, SMARCB1, CREBBP, NUP98, SF1, MMS19                                                                                                                                                                                                                                                                                                                                                                                                                  |

|            |                              |                       |                                                                                                                                                                                                                                                                                                                                                                                                                                                                                                                                                                                                                                                                                                                                                                                                                                                                                                                                                                                                                                                                                                                                                                                                                                                                                                                                                                    |
|------------|------------------------------|-----------------------|--------------------------------------------------------------------------------------------------------------------------------------------------------------------------------------------------------------------------------------------------------------------------------------------------------------------------------------------------------------------------------------------------------------------------------------------------------------------------------------------------------------------------------------------------------------------------------------------------------------------------------------------------------------------------------------------------------------------------------------------------------------------------------------------------------------------------------------------------------------------------------------------------------------------------------------------------------------------------------------------------------------------------------------------------------------------------------------------------------------------------------------------------------------------------------------------------------------------------------------------------------------------------------------------------------------------------------------------------------------------|
|            |                              |                       | ,TAF9,RYBP,PSIP1,PPARGC1B,NSD1,HMGB1,SMARCD1,CEBPZ,MECP2,DDX54,HDGF,HCFC1,TRRAP,PPRC1,TFB2M,NRIP1,MYBBP1A,RALY,ENO1,DDX1,EWSR1,ARID1B,KAT6A,PA2G4,SMARCA4,HMGA1,LMO2,CBFA2T3,EP300,RRP1B,THRAP3,NPM1,CITED2,TRIM28,BCLAF1,SRSF2,TRIM24,CCAR1,SMARCC1,BTG1,FUS,DHX9,HNRNPU                                                                                                                                                                                                                                                                                                                                                                                                                                                                                                                                                                                                                                                                                                                                                                                                                                                                                                                                                                                                                                                                                          |
| GO:0000166 | nucleotide binding           | 3.127047203682427e-15 | HRAS,TXK,ACSF3,DAP3,MSH3,TRIP13,CHTOP,ERAL1,DNAJA2,MMAB,RAD51C,UBE2Q1,MTREX,FES,RAB10,ULK3,DNM1L,RHEB,NVL,KIF26B,MYO16,ATP11A,EFTUD2,CRCP,GNP2,AIFM2,PSMC3,TIMM44,DHX38,GART,NT5C3A,DDX23,TRNT1,LHX4,RAB7A,DNMT1,PP5C,DUS1L,DHX16,TOP2B,LRWD1,CCT6A,EEF2,AFG3L2,CCT8,KIF5B,CMPK1,NOL9,MVK,PLK4,SLK,PEBP1,GSPT1,ACTR8,PSMC5,STK35,MAPK1,ATP2A2,ABCF3,DHX33,DHX15,MTOR,DHX30,SMARCA5,DHFR,HSPA9,MCCC1,GMPS,ASCC3,UBE2L3,PSMC2,GRPEL1,DDX10,SETX,STK24,RIOK2,RAB35,STK25,PAK2,PRMT5,MCCC2,UCK2,TUBB,DYRK1A,GNL3L,DHX29,POLR2D,NIN,ACLY,PAN3,RABL6,XRCC2,KIFC3,EPRS1,LYN,DDX42,DDX20,DDX51,VCP,GBP2,DHX34,CSNK1G2,CDK4,THG1L,SMC1A,FOXRED2,G3BP1,GNL2,MCM6,AQR,DHCR7,CLCN6,ARL8B,DDX18,UBA2,CHD7,RRM1,PI4KA,CCT3,CDK7,PKM,KIF2A,ATAD3B,GNAQ,IRAK1,PIK3C2B,IP6K1,NAT10,EP400,MTHFD1,ADSS2,MECP2,PRKAR2B,DDX54,N4BP2,XRCC6,MBD1,CSNK2A2,DDX3X,LBR,HDGF,MCM2,PFAS,CHEK1,POLE,PIIP5K2,CSK,DNAJA1,DYNC1H1,TSR1,SLC19A1,CLCN7,STK17A,UBE2N,BAZ1B,TLK1,GFM1,TCP1,CCT5,CDK6,CHD3,RAN,HSPA4,AK2,MSH2,CDK12,GLYR1,MCM3,PAICS,DDX1,CTPS1,DDX49,TXNRD1,ATAD3A,ARF6,CCT2,HSP90AB1,DUS3L,SMG1,DHX37,SMARCA4,PRKDC,YES1,PRMT1,FARSA,XRCC5,DDX5,DDX46,EIF4A3,ACTG1,DDX39A,DDX56,NOLC1,SNRNP200,ABCF1,ACACA,HSPD1,PIM2,GAPDH,EIF5B,PGD,MYH10,HSPH1,TGFBR1,ATP13A3,THRAP3,RUNX1,EIF4G1,HSP90AA1,MDN1,SQLE,MCM4,KIF1A,BAG1,MAT2A,DDX21,MCM7,HMGCR,GLUL,ACTB,DHX9,HNRNPU,MCM5,DHCR24,HSPA8 |
| GO:1901265 | nucleoside phosphate binding | 3.302441829774877e-15 | HRAS,TXK,ACSF3,DAP3,MSH3,TRIP13,CHTOP,ERAL1,DNAJA2,MMAB,RAD51C,UBE2Q1,MTREX,FES,RAB10,ULK3,DNM1L,RHEB,NVL,KIF26B,MYO16,ATP11A,EFTUD2,CRCP,GNP2,AIFM2,PSMC3,TIMM44,DHX38,GART,NT5C3A,DDX23,TRNT1,LHX4,RAB7A,DNMT1,PP5C,DUS1L,DHX16,TOP2B,LRWD1,CCT6A,EEF2,AFG3L2,CCT8,KIF5B,CMPK1,NOL9,MVK,PLK4,SLK,PEBP1,GSPT1,ACTR8,PSMC5,STK35,MAPK1,ATP2A2,ABCF3,DHX33,DHX15,MTOR,DHX30,SMARCA5,DHFR,HSPA9,MCCC1,GMPS,ASCC3,UBE2L3,PSMC2,GRPEL1,DDX10,SETX,STK24,RIOK2,RAB35,STK25,PAK2,PRMT5,MCCC2,UCK2,TUBB,DYRK1A,GNL3L,DHX29,POLR2D,NIN,ACLY,PAN3,RABL6,XRCC2,KIFC3,EPRS1,LYN,DDX42,DDX20,DDX51,VCP,GBP2,DHX34,CSNK1G2,CDK4,THG1L,SMC1A,FOXRED2,G3BP1,GNL2,MCM6,AQR,DHCR7,CLCN6,ARL8B,DDX18,UBA2,CHD7,RRM1,PI4KA,CCT3,CDK7,PKM,KIF2A,ATAD3B,GNAQ,IRAK1,PIK3C2B,IP6K1,NAT10,EP400,MTHFD1,ADSS2,MECP2,PRKAR2B,DDX54,N4BP2,XRCC6,MBD1,CSNK2A2,DDX3X,LBR,HDGF,MCM2,PFAS,CHEK1,POLE,PIIP5K2,CSK,DNAJA1,DYNC1H1,TSR1,SLC19A1,CLCN7,STK17A,UBE2N,BAZ1B,TLK1,GFM1,TCP1,CCT5,CDK6,CHD3,RAN,HSPA4,AK2,MSH2,CDK12,GLYR1,MCM3,PAICS,DDX1,CTPS1,DDX49,TXNRD1,ATAD3A,ARF6,CCT2,HSP90AB1,DUS3L,SMG1,DHX37,SMARCA4,PRKDC,YES1,PRMT1,FARSA,XRCC5,DDX5,DDX46,EIF4A3,ACTG1,DDX39A,DDX56,NOLC1,SNRNP200,AB                                                                                                                                                                                      |

|            |                                   |                        |                                                                                                                                                                                                                                                                                                                                                                                                                                                                                                                                                                                                                                                                                                                                                                                                                                                                                                                                                                                                                                                                                                                                                                                                                                                                                                                                                                                                                                                                                                                                                                   |
|------------|-----------------------------------|------------------------|-------------------------------------------------------------------------------------------------------------------------------------------------------------------------------------------------------------------------------------------------------------------------------------------------------------------------------------------------------------------------------------------------------------------------------------------------------------------------------------------------------------------------------------------------------------------------------------------------------------------------------------------------------------------------------------------------------------------------------------------------------------------------------------------------------------------------------------------------------------------------------------------------------------------------------------------------------------------------------------------------------------------------------------------------------------------------------------------------------------------------------------------------------------------------------------------------------------------------------------------------------------------------------------------------------------------------------------------------------------------------------------------------------------------------------------------------------------------------------------------------------------------------------------------------------------------|
|            |                                   |                        | CF1, ACACA, HSPD1, PIM2, GAPDH, EIF5B, PGD, MYH10, HSPH1, TGFB1, ATP13A3, THRAP3, RUNX1, EIF4G1, HSP90AA1, MDN1, SQLE, MCM4, KIF1A, BAG1, MAT2A, DDX21, MCM7, HMGCR, GLUL, ACTB, DHX9, HNRNP, MCM5, DHCR24, HSPA8                                                                                                                                                                                                                                                                                                                                                                                                                                                                                                                                                                                                                                                                                                                                                                                                                                                                                                                                                                                                                                                                                                                                                                                                                                                                                                                                                 |
| GO:0043021 | ribonucleoprotein complex binding | 1.4257583737685725e-14 | SNRPB, ERF1, SRP72, EZH2, NVL, OXA1L, PQBP1, MRRF, EEF2, PRPF6, DHX33, LETM1, MTOR, BAG6, EIF4B, SNRPA, NAA15, SBDS, C1QBP, PRMT5, TMEM223, BOP1, WDR12, DHX29, SNRPD1, GEMIN5, ZNF622, DDX3X, PRMT7, NCLN, DDX5, EIF4A3, EIF5A, NOLC1, ABCF1, RBM3, PES1, SERBP1, NPM1, ETF1, LARP1, DHX9, HNRNP                                                                                                                                                                                                                                                                                                                                                                                                                                                                                                                                                                                                                                                                                                                                                                                                                                                                                                                                                                                                                                                                                                                                                                                                                                                                 |
| GO:0019899 | enzyme binding                    | 2.1855488246916012e-14 | NOP14, TMEM127, MSH3, MACROH2A1, MTA2, TIRAP, CBX3, PHB, DNMT1, RHEB, PPP6R3, SMG5, BRD4, SH3YL1, CHCHD3, MYO16, MCM10, RANBP3, CASP8, PSMA3, MAD2L2, PATZ1, PPP3R1, TPRN, PAFAH1B1, RAB7A, BICD1, ANAPC7, GAB2, TOP2B, CLTC, EEF2, SPRY2, RNF40, CUL3, ARPP19, MEF2C, TCF3, MAF1, CCNY, ZFYVE26, PEBP1, MAPK1, CASP3, ATP2A2, IPO9, PKP3, STRIP1, CTR9, UHRF1BP1, RPRD2, IKZF3, KANSL1, VDACL1, TFAP4, FAF1, HNRNPA0, BAG6, HSPA9, TCF7L2, UBE2L3, SETMAR, RPTOR, PPP1R10, TNF, RABGGTB, PPP2R5A, CLTA, ATP6V1G1, PPP1CC, CAVIN2, CDC27, HERC2, AKAP8, RCC1, C1QBP, CRK, PAK2, SNX9, PCBP2, WDR70, ARHGAP6, ZNF326, TUBB, CUL4A, PSMD1, CDC37, RILP, WAC, ARHGEF2, BRCA2, RANBP1, NIN, PAF1, EPRS1, UBE4B, HNRNPUL1, CUTA, LYN, APC, ELOF1, PELP1, SLC12A2, EZR, DDX20, MMS19, TAF9, YWHAG, ELAVL1, VCP, CSTB, BEX4, DVL2, AGO2, TBC1D14, SAE1, IGF2R, UBA2, USP37, RNF138, HMGB1, IRAK1, PUS7, NAT10, SNU13, SKI, PRKAR2B, PCNA, CDC25A, DIAPH1, IQGAP2, TNPO2, MCM2, JUND, AATF, SLC25A5, ARPC4, CSK, DNAJA1, SUMO3, XPO1, PHACTR1, SERPINE1, TPR, UBE2N, NRIP1, TCP1, YWHAB, ENO1, FAM83H, UBC, MSH2, CDK12, TNPO1, CUL1, LTBR, CASC3, KPNB1, ATP6V0A1, ARF6, RBBP4, CNPPD1, CCT2, HSP90AB1, PA2G4, SMARCA4, PRKDC, YES1, PRMT1, MALT1, HMGA1, XRCC5, ANK1, LMNB1, IPO7, ACTG1, CDT1, NOP56, CORO1C, KHDRBS1, HNRNPD, LRPPRC, RANBP2, HSPD1, YBX1, AXIN1, GDI2, ANP32B, IPO5, NPM1, CITED2, WDR43, TERC, TRIM28, NEFH, U2AF2, SRSF2, HSP90AA1, NOP58, RESF1, BAG1, SQSTM1, SFPQ, KCNH2, SRSF3, EIF3A, BTG1, GCLM, ACTB, DHX9, HNRNP, NCL, EGR1, DHCR24, HSPA8 |
| GO:0003724 | RNA helicase activity             | 4.95583457347062e-14   | MTREX, DHX38, DDX23, DHX16, DHX33, DHX15, DHX30, DDX10, DHX29, DDX42, DDX20, DDX51, DHX34, G3BP1, AQR, DDX18, DDX54, DDX3X, DDX1, DDX49, DHX37, DDX5, DDX46, EIF4A3, DDX39A, DDX56, SNRNP200, DDX21, DHX9                                                                                                                                                                                                                                                                                                                                                                                                                                                                                                                                                                                                                                                                                                                                                                                                                                                                                                                                                                                                                                                                                                                                                                                                                                                                                                                                                         |
| GO:0005524 | ATP binding                       | 7.582381189180597e-14  | TXK, ACSF3, MSH3, TRIP13, DNAJA2, MMAB, RAD51C, UBE2Q1, MTREX, FES, ULK3, NVL, KIF26B, MYO16, ATP11A, PSMC3, TIMM44, DHX38, GART, DDX23, TRNT1, PPP5C, DHX16, TOP2B, CCT6A, AFG3L2, CCT8, KIF5B, CMPK1, NOL9, MVK, PLK4, SLK, PEBP1, ACTR8, PSMC5, STK35, MAPK1, ATP2A2, ABCF3, DHX33, DHX15, MTOR, DHX30, SMARCA5, HSPA9, MCCC1, GMPS, ASCC3, UBE2L3, PSMC2, DDX10, SETX, STK24, RIOK2, STK25, PAK2, MCC2, UCK2, DYRK1A, DHX29, ACLY, PAN3, XRCC2, KIFC3, EPRS1, LYN, DDX42, DDX20, DDX51, VCP, DHX34, CSNK1G2, CDK4, THG1L, SMC1A, G3BP1, MCM6, AQR, CLCN6, DDX18, UBA2, CHD7, RRM1, PI4KA, CCT3, CDK7, PKM, KIF2A, ATAD3B, IRAK1, PIK3C2B, IP6K1, NAT10, EP400, MTHFD1, DDX54, N4BP2, XRCC6, CSNK2A2, DDX3X, MCM2, PFAS, CHEK1, PPIP5K2, CSK, DNAJA1, DYNC1H1, CLCN7, STK17A, UBE2N, BAZ1B, TLK1, TCP1, CCT5, CDK6, CHD3, HSPA4, AK2, MSH2, CDK12, MCM3, PAICS, DDX1, CTSP1, DDX49, ATAD3A, CCT2, HSP90AB1, SMG1, DHX37, SMARCA4, PRKDC, YES1, FARS, XRCC5, DDX5,                                                                                                                                                                                                                                                                                                                                                                                                                                                                                                                                                                                              |

|            |                                           |                        |                                                                                                                                                                                                                                                                                                                                                                                                                                                                                                                                                                                                                                                                                                                                                                                                                                                                                                                                                                                                                                                                                                                                                                                                                                                                                                                                                                                                                                                                                                                                                                                                                                                                                                                                                                                                                                                                                                                                                                                                                                                                                                                                                                                                                                                                                                                                                                                                                                                                                                                                                                                                                                                                                                                                                                                                                                                                                                                                                                  |
|------------|-------------------------------------------|------------------------|------------------------------------------------------------------------------------------------------------------------------------------------------------------------------------------------------------------------------------------------------------------------------------------------------------------------------------------------------------------------------------------------------------------------------------------------------------------------------------------------------------------------------------------------------------------------------------------------------------------------------------------------------------------------------------------------------------------------------------------------------------------------------------------------------------------------------------------------------------------------------------------------------------------------------------------------------------------------------------------------------------------------------------------------------------------------------------------------------------------------------------------------------------------------------------------------------------------------------------------------------------------------------------------------------------------------------------------------------------------------------------------------------------------------------------------------------------------------------------------------------------------------------------------------------------------------------------------------------------------------------------------------------------------------------------------------------------------------------------------------------------------------------------------------------------------------------------------------------------------------------------------------------------------------------------------------------------------------------------------------------------------------------------------------------------------------------------------------------------------------------------------------------------------------------------------------------------------------------------------------------------------------------------------------------------------------------------------------------------------------------------------------------------------------------------------------------------------------------------------------------------------------------------------------------------------------------------------------------------------------------------------------------------------------------------------------------------------------------------------------------------------------------------------------------------------------------------------------------------------------------------------------------------------------------------------------------------------|
|            |                                           |                        | DDX46, EIF4A3, ACTG1, DDX39A, DDX56, NOLC1, SNRN P200, ABCF1, ACACA, HSPD1, PIM2, MYH10, HSPH1, TG FBR1, ATP13A3, THRAP3, RUNX1, EIF4G1, HSP90AA1, MDN1, MCM4, KIF1A, MAT2A, DDX21, MCM7, GLUL, ACTB, DHX9, HNRNPU, MCM5, HSPA8                                                                                                                                                                                                                                                                                                                                                                                                                                                                                                                                                                                                                                                                                                                                                                                                                                                                                                                                                                                                                                                                                                                                                                                                                                                                                                                                                                                                                                                                                                                                                                                                                                                                                                                                                                                                                                                                                                                                                                                                                                                                                                                                                                                                                                                                                                                                                                                                                                                                                                                                                                                                                                                                                                                                  |
| <b>BP</b>  |                                           |                        |                                                                                                                                                                                                                                                                                                                                                                                                                                                                                                                                                                                                                                                                                                                                                                                                                                                                                                                                                                                                                                                                                                                                                                                                                                                                                                                                                                                                                                                                                                                                                                                                                                                                                                                                                                                                                                                                                                                                                                                                                                                                                                                                                                                                                                                                                                                                                                                                                                                                                                                                                                                                                                                                                                                                                                                                                                                                                                                                                                  |
| GO:0044260 | cellular macromole cule metabolic process | 8.282456461 504237e-57 | SNRPB, DAP3, MSH3, TRIP13, CHTOP, ZNF274, GYG1, K MT2B, RNASEH1, SUPT7L, MACROH2A1, MUS81, MTA2, T IRAP, RAD51C, MTREX, OTUD6B, NACA, PHB, METTL3, E ZH2, DCLRE1C, RFWD3, PAXIP1, PPP6R3, FUT8, SMG5, BRD4, STT3A, DHDDS, MRPL1, MRPL11, RPUSD4, DENR, CDC123, RNASEH2C, HROB, MRPS30, NVL, HNRNPL, PWP 1, DOLPP1, MCM10, CHRAC1, KMT2D, PSMA3, PSMD3, MA D2L2, MRRF, POLDIP2, PSMC3, FBXO45, ARID2, RNPS1, USP11, USP14, DNMT1, PPP5C, BAP1, ANAPC7, SUB1, GTF2H1, TOP2B, LRWD1, EIF4EBP2, CCT6A, KAT7, EEF 2, AURKAIP1, WDR5, CCT8, BCCIP, RNF40, CUL3, NONO, UBR3, TCF3, TEX15, GID8, CLSPN, NBAS, ZFYVE26, Z C3H4, GSPT1, GRSF1, UBQLN4, ACTR8, PSMC5, ZC3HAV 1, MAPK1, ZNRF1, EEF1D, PKP3, PCLAF, CERS2, DHX33, CTR9, UIMC1, PUM1, MTOR, KANSL1, SMG9, SMARCA5, H2AW, EIF3D, PRMT6, FAF1, HNRNPA0, BAG6, DHFR, TC F7L2, MRPL15, PRAME, ASCC3, UBE2L3, THOC1, PSMC2, MCMBP, SETMAR, PPP1R10, MRPS35, HECTD1, TNF, EI F4B, WDR33, TRMT6 1A, IGF2BP3, PUM2, MT- TL1, BACH1, RBM10, SETX, TRMT2A, METTL8, APEX1, E DC4, ARID1A, PPP1CC, ZC3H14, B4GALT5, CDC27, HER C2, CTSL, C1QBP, VPS72, TICRR, EOGT, PRMT5, PCBP2, ADD1, TRMT6, RNF126, BAZ1A, WDR70, ALG8, RAD23B, TAF4, RBM8A, SETD2, FEN1, CHAF1A, TRMO, SLBP, CU L4A, JADE2, NUCKS1, SDCBP, PSMD1, SSB, GNL3L, MT- TF, TFIP11, PSMB2, WAC, EIF3G, DHX29, BRCA2, POLR 2D, ZDHHC5, EIF3M, WTAP, BCL7B, SNRPD1, PAN3, PAF 1, ZC3H18, FASTKD2, TCOF1, XRCC2, PDS5A, BRCC3, S MARCB1, TRIR, CREBBP, EXOSC3, EPRS1, COPS3, UBE4 B, LSM14A, CNOT1, ASH1L, GEMIN5, APC, CAPN1, ELOF 1, WDR6, NFYC, XRN2, TRUB2, MMS19, ELOA, TAF9, ELA VL1, VCP, DNAJB12, RYBP, DHX34, MRPS2, SETD1A, WD R82, SMC1A, AGO2, FOXRED2, MCM6, IER3, RBM15B, US P37, HNRNPA1, GAR1, MAGOH, PBRM1, CTCF, ANKRD17, RRM2, RRM1, NSD1, CCT3, CDK7, RNF138, SETD1B, PKM, HMGB1, MAEA, BZW1, SMARCD1, CANX, YY1, MLLT10, P US7, NAT10, TRMT10C, EP400, LEPR, MECP2, CSDE1, N 4BP2, TARDDBP, LARP4, XRCC6, RPL22, PCNA, CSNK2A2, UPF2, DDX3X, EIF4G2, MCM2, HCF1, CHEK1, AATF, C LN6, ZMPSTE24, PRMT7, POLE, TRRAP, EXOSC9, XPO1, TPR, ENC1, ZFP36L2, KEAP1, TFB2M, UBE2N, MRT04, G FM1, DDB1, LRRC47, NASP, CHST3, TCP1, CENPF, CCT5, POLE3, CDC5L, ST3GAL2, RAN, BEND3, UBC, WDR81, P PP2CA, MSH2, MAN2A2, KMT2A, MCM3, GRWD1, ZNF598, GATAD2A, DKC1, DDX1, CUL1, DDX49, CASC3, SSRP1, A RID1B, HNRNPAB, USP36, RBBP4, NCBP1, CCT2, HSP90 AB1, EIF3B, DUS3L, PA2G4, SMG1, PRPF19, SMARCA4, EIF3J, PRKDC, PRMT1, HNRNPC, WWP2, SUPT16H, HMGA 1, FARSA, CELF1, XRCC5, DDX5, DEK, EIF4A3, NDST1, TRIP12, CIZ1, CDT1, KHDRBS1, HNRNPD, LRPPRC, EIF 5A, SUPT6H, NOLC1, CBFA2T3, ABCF1, NSUN2, AP5Z1, HSPD1, GAPDH, YBX1, LIN28B, EIF5B, RBM3, AXIN1, P ABPC1, SERBP1, SF3B3, THRAP3, NPM1, RIF1, ETF1, T FRC, EIF4G1, TRIM28, BCLAF1, ECPAS, HSP90AA1, CA PRIN1, TRMT1, MCM4, HNRNPA2B1, LARP1, SQSTM1, SF PQ, PABPC4, HNRNPM, EIF3A, MCM7, SMARCC1, MYC, SE T, BTG1, IGF2BP1, FOS, MYB, KHSRP, FUS, ILF3, GLUL, ACTB, DHX9, HNRNPU, MCM5, NCL |

|            |                                                                |                        |                                                                                                                                                                                                                                                                                                                                                                                                                                                                                                                                                                                                                                                                                                                                                                                                                                                                                                                                                                                                                                                                                                                                                                                                                                                                                                                                                                                                                                                                                                                                                                                                                                                                                                                                                                                                                                                                                                                                                                                                                                                                                                                                                                                                                                                                                                                                                                                                                                                                                                                                                                                                                                                                                                                                                                                                                                                                                                                                                                                                                                                                                                                                                                                                                                                                          |
|------------|----------------------------------------------------------------|------------------------|--------------------------------------------------------------------------------------------------------------------------------------------------------------------------------------------------------------------------------------------------------------------------------------------------------------------------------------------------------------------------------------------------------------------------------------------------------------------------------------------------------------------------------------------------------------------------------------------------------------------------------------------------------------------------------------------------------------------------------------------------------------------------------------------------------------------------------------------------------------------------------------------------------------------------------------------------------------------------------------------------------------------------------------------------------------------------------------------------------------------------------------------------------------------------------------------------------------------------------------------------------------------------------------------------------------------------------------------------------------------------------------------------------------------------------------------------------------------------------------------------------------------------------------------------------------------------------------------------------------------------------------------------------------------------------------------------------------------------------------------------------------------------------------------------------------------------------------------------------------------------------------------------------------------------------------------------------------------------------------------------------------------------------------------------------------------------------------------------------------------------------------------------------------------------------------------------------------------------------------------------------------------------------------------------------------------------------------------------------------------------------------------------------------------------------------------------------------------------------------------------------------------------------------------------------------------------------------------------------------------------------------------------------------------------------------------------------------------------------------------------------------------------------------------------------------------------------------------------------------------------------------------------------------------------------------------------------------------------------------------------------------------------------------------------------------------------------------------------------------------------------------------------------------------------------------------------------------------------------------------------------------------------|
| GO:0019219 | regulation of nucleobase-containing compound metabolic process | 1.3663776749014435e-50 | <p> <i>HRAS, TXK, MTF, JMJD1C, MSH3, ZNF274, KMT2B, SUP T7L, MACROH2A1, BRD9, MED16, NOL11, BICRA, MTA2, TIRAP, CWC22, RIOX1, PHF5A, NACA, MED6, PRXL2C, CBX3, PHB, METTL3, EZH2, TCF20, DNMT1L, PAXIP1, LRR FIP1, GPATCH3, INTS6, SMG5, BRD4, ZNF581, SPIN4, ZNF74, CTDP1, MED1, NVL, HNRNP1, PWP1, CHAC1, KM T2D, TAF4B, PQBP1, PSCP1, CEP350, MAD2L2, PSMC3, ZBTB40, ADNP2, ARID2, PATZ1, TRIM44, RNPS1, LHX4, ZNF512B, RBL1, PPP3R1, HIF1AN, SS18L1, MED29, HNRNP1, USP14, LIMD1, DNMT1, LYL1, BAP1, SUB1, GT F2H1, TOP2B, LYAR, CCNH, NAB2, CCT6A, KAT7, WDR5, CCT8, FUBP3, CUL3, NONO, MEF2C, TCF3, TEX15, MAF1, NBAS, PRPF6, ZC3H4, ZNF26, ZNF24, GRSF1, UBQLN4, ACTR8, PSMC5, ZC3H4V1, MAPK1, PKP3, ABT1, DHX33, CTR9, NCOA5, FADS1, ZFP91, UIMC1, PUM1, MTOR, IKZF3, KANSL1, SPEN, SMARCA5, ZNF45, RSF1, TFAP4, PRMT6, FAF1, HNRNPA0, ZNF131, SBNO1, ZNF431, MTDH, TCF7L2, ZNF239, PRAME, UBE2L3, THOC1, SETMAR, RPTOR, PPP1R10, TNF, RAVR1, IGF2BP3, MED28, ELL2, PUM2, SSBP3, SNRPA, ZNF586, BACH1, RBM10, SETX, NFILZ, AP3D1, APEX1, BPTF, ICE1, RIOK2, NAA15, ARID1A, PITHD1, ZC3H14, SRSF10, C1QBP, VPS72, ZNF587B, CRK, TICRR, MED15, PRMT5, PCBP2, RBM3, BAZ1A, WDR70, MLLT3, TAF4, RBM14, RBM8A, KDM3B, LRP8, SETD2, ZNF326, INTS13, ZNF282, DYRK1A, TFDP2, CUL4A, JADE2, NUCKS1, SDCBP, GNL3L, NSRP1, TFIP11, WAC, ARHGEF2, BRCA2, POLR2D, WTAP, COPS2, BCL7B, RBM42, ZFX, PAN3, MED13L, PAF1, ZC3H18, FASTKD2, PHB2, PDS5A, BRCC3, ZNF75A, SMARCB1, CREBBP, EXOSC3, NUP98, CNOT1, ASH1L, PLAGL2, NFYC, SF1, PELP1, EZR, DDX20, MMS19, ELOA, TAF9, ELAVL1, UTP15, VCP, RYBP, SAFB2, DHX34, PSIP1, RBM12, CDK4, DVL2, POLR3C, RBM25, WDR82, AGO2, E2F4, RNF220, MCM6, IER3, ADNP, NFKB1, UBT, BRD2, CHD7, RBM15B, USP37, HNRNPA1, PPARGC1B, MAGOH, PBRM1, CTCF, HHEX, ANKRD17, ELF1, ZNF614, NSD1, CCT3, CDK7, FOXK2, HMGB1, SMARCD1, YY1, MLLT10, IRAK1, NAT10, SRSF6, EP400, CEBPZ, MECP2, CSDE1, MBNL1, SKI, DDX54, TARDBP, XRCC6, PCNA, MBD1, DDX3X, HDGF, ZNF789, EIF4G2, MCM2, JUND, HCFC1, CHEK1, AATF, ZMPSTE24, SLTM, UBP1, TRRAP, EXOSC9, NUP62, PPIA, TPR, SRSF7, TGFBRAP1, ZFP36L2, SF3B4, PPRC1, SLC38A2, KEAP1, TFB2M, UBE2N, BAZ1B, NRIP1, MYBBP1A, BACH2, PITX1, ASXL2, TCP1, CENPF, RALY, ENO1, CCT5, FUBP1, POLE3, CDK6, CDC5L, CHD3, BEND3, ZNF787, TFAM, PPP2CA, SSU72, MSH2, CDK12, ZBTB2, GLYR1, KMT2A, MCM3, NOSTRIN, GATAD2A, DKC1, EWSR1, DDX49, CASC3, ARID1B, CPSF7, ZNF33B, HNRNPAB, KAT6A, USP36, RBBP4, SAFB, NCBP1, HEATR1, CCT2, HSP90AB1, PA2G4, HNRNP, SMG1, PRPF19, SMARCA4, PRKDC, YES1, ZNF121, TRA2B, HNRNPC, MALT1, WWP2, SUPT16H, HMGA1, CELF1, RBMXL1, XRCC5, DDX5, UTP4, DEK, LMO2, EIF4A3, TRIP12, CIZ1, CDT1, KHDRBS1, HNRNPD, LRPPRC, EIF5A, CTDSP1, SUPT6H, DNAJB6, NOLC1, SREBF2, CBFA2T3, MGA, NSUN2, PIM2, YBX1, LIN28B, RBM3, AXIN1, RREB1, EP300, TGFBR1, DAZAP1, RRP1B, FOSB, SRRT, PABPC1, SERBP1, AHNAK, SF3B3, PTMA, THRAP3, MLLT1, HNRNP, NPM1, RIF1, CTED2, SON, WDR43, TFR, RUNX1, TRIM28, U2AF2, NR2F2, BCLAF1, SRSF2, HSP90AA1, NFATC3, ZNF521, MCM4, TRIM24, RESF1, HNRNPA2B1, LARP1, SQSTM1, PTBP1, CCAR1, DDX21, SFPQ, PABPC4, HNRNPM, KCNH2, SRSF3, MCM7, SMARCC1, MYC, SET, BTG1, IGF2BP1, FOS, MYB, KHSRP, ZEB2, RELN, FUS, ILF3, ACTB, DHX9, HNRNPU, MCM5, NCL, EGR1, HSPA8</i> </p> |
| GO:0051171 | regulation of                                                  | 3.645982953            | <p> <i>HRAS, TXK, MTF, JMJD1C, MSH3, CHTOP, ZNF274, KMT2B, SUPT7L, MACROH2A1, BRD9, MED16, NOL11, BICRA</i> </p>                                                                                                                                                                                                                                                                                                                                                                                                                                                                                                                                                                                                                                                                                                                                                                                                                                                                                                                                                                                                                                                                                                                                                                                                                                                                                                                                                                                                                                                                                                                                                                                                                                                                                                                                                                                                                                                                                                                                                                                                                                                                                                                                                                                                                                                                                                                                                                                                                                                                                                                                                                                                                                                                                                                                                                                                                                                                                                                                                                                                                                                                                                                                                         |



|  |                                                      |            |                                                                                                                                                                                                                                                                                                                                                                                                                                                                                                                                                                                                                                                                                                                                                                                                                                                                                                                                                                                                                                                                                                                                                                                                                                                                                                                                                                                                                                                                                                                                                                                                                                                                                                                                                                                                                                                                                                                                                                                                                                                                                                                                                                                                                                                                                                                                                                                                                                                                                                                                                                                                                                                                                                                                                                                                                                                                                                                                                                                                                                                                                                                                                       |
|--|------------------------------------------------------|------------|-------------------------------------------------------------------------------------------------------------------------------------------------------------------------------------------------------------------------------------------------------------------------------------------------------------------------------------------------------------------------------------------------------------------------------------------------------------------------------------------------------------------------------------------------------------------------------------------------------------------------------------------------------------------------------------------------------------------------------------------------------------------------------------------------------------------------------------------------------------------------------------------------------------------------------------------------------------------------------------------------------------------------------------------------------------------------------------------------------------------------------------------------------------------------------------------------------------------------------------------------------------------------------------------------------------------------------------------------------------------------------------------------------------------------------------------------------------------------------------------------------------------------------------------------------------------------------------------------------------------------------------------------------------------------------------------------------------------------------------------------------------------------------------------------------------------------------------------------------------------------------------------------------------------------------------------------------------------------------------------------------------------------------------------------------------------------------------------------------------------------------------------------------------------------------------------------------------------------------------------------------------------------------------------------------------------------------------------------------------------------------------------------------------------------------------------------------------------------------------------------------------------------------------------------------------------------------------------------------------------------------------------------------------------------------------------------------------------------------------------------------------------------------------------------------------------------------------------------------------------------------------------------------------------------------------------------------------------------------------------------------------------------------------------------------------------------------------------------------------------------------------------------------|
|  | n of<br>nitrogen<br>compound<br>metabolic<br>process | 961369e-48 | ,MTA2,TIRAP,CWC22,OTUD6B,RIOX1,PHF5A,NACA,<br>MED6,PRXL2C,CBX3,PHB,METTL3,EZH2,TCF20,DNM<br>1L,PAXIP1,LRRFIP1,GPATCH3,INTS6,PPP6R3,SMG<br>5,BRD4,ZNF581,SPIN4,ZNF74,RPUSD4,CD123,CT<br>DP1,MED1,NVL,HNRNPL,PWP1,CHRA1,KMT2D,CASP<br>8,TAF4B,PSMA3,PQBP1,PSMD3,PSPC1,CEP350,MAD<br>2L2,PSMC3,ZBTB40,ADNP2,ARID2,PATZ1,TRIM44,<br>RNPS1,LHX4,ZNF512B,RBL1,PPP3R1,HIF1AN,SS18<br>L1,MED29,HNRNPH1,USP14,RAB7A,LIMD1,DNMT1,L<br>YL1,BAP1,SUB1,GTTF2H1,BUB3,TP2B,LYAR,SLC39<br>A10,CCNH,NAB2,EIF4EBP2,CCT6A,KAT7,CLTC,EEF<br>2,AURKAIP1,WDR5,CCT8,FUBP3,BCCIP,SPRY2,RNF<br>40,CUL3,ARPP19,NONO,MEF2C,UBR3,TCF3,TEX15,<br>MAF1,CLSPN,NBAS,CCNY,CRIM1,PRPF6,ZC3H4,PEB<br>P1,ZNF26,ZNF24,GSPT1,GRSF1,UBQLN4,ACTR8,PS<br>MC5,ZC3HAV1,MAPK1,CASP3,PKP3,ABT1,DHX33,CT<br>R9,NCOA5,FADS1,ZFP91,UIMC1,PUM1,MTOR,IKZF3<br>,KANSL1,SPEN,SMARCA5,EIF3D,ZNF45,RSF1,TFAP<br>4,DELE1,PRMT6,TSPYL5,FAF1,HNRNPA0,BAG6,ZNF<br>131,SBNO1,ZNF431,DHFR,MTDH,TCF7L2,ZNF239,P<br>RAME,UBE2L3,THOC1,PSMC2,SETMAR,RPTOR,PPP1R<br>10,HECTD1,TNF,RAVER1,EIF4B,SAMSN1,PPP2R5A,<br>IGF2BP3,MED28,ELL2,PUM2,SSBP3,SNRPA,ZNF586<br>,BACH1,RBM10,SETX,NFILZ,AP3D1,METTL8,APEX1<br>,BPTF,ICE1,RIOK2,NAA15,ARID1A,PITHD1,ZC3H1<br>4,SRSF10,AKAP8,C1QBP,VPS72,ZNF587B,CRK,TIC<br>RR,MED15,PAK2,PRMT5,SNX9,PCBP2,RBMX,BAZ1A,<br>WDR70,MLLT3,RAD23B,TAF4,RBM14,RBM8A,KDM3B,<br>LRP8,SETD2,ZNF326,INTS13,ZNF282,DYRK1A,TFD<br>P2,CUL4A,JADE2,NUCKS1,SDCBP,PSMD1,CDC37,GN<br>L3L,RILP,NSRP1,TFIP11,WAC,DHX29,ARHGEF2,IL<br>17D,BCRA2,POLR2D,WTAP,COPS2,BCL7B,RBM42,ZF<br>X,PAN3,MED13L,PAF1,ZC3H18,BIRC6,FASTKD2,PH<br>B2,TCOF1,PDS5A,BRCC3,ZNF75A,SMARCB1,CREBBP<br>,EXOSC3,EPRS1,COPS3,LSM14A,NUP98,CNOT1,LYN<br>,ASH1L,GEMIN5,PLAGL2,APC,NFYC,SF1,BELP1,EZ<br>R,TRUB2,DDX20,MMS19,ELOA,TAF9,YWHAG,ELAVL1<br>,UTP15,VCP,RYBP,SAFB2,DHX34,PSIP1,CSTB,BEX<br>4,RBM12,CDK4,DVL2,POLR3C,RBM25,WDR82,AGO2,<br>E2F4,RNF220,SAE1,MCM6,IER3,ADNP,UBA2,NFKB1<br>,UBTF,BRD2,CHD7,RBM15B,USP37,HNRNPA1,PPARG<br>C1B,MAGOH,PBRM1,CTCF,HHEX,ANKRD17,ELF1,ZNF<br>614,NSD1,CCT3,CDK7,PKM,FOXK2,HMGB1,BZW1,SM<br>ARCD1,GNAQ,YY1,MLLT10,IRAK1,PUS7,NAT10,TRM<br>T10C,SRSF6,EP400,CEBPZ,LEPR,MECP2,CSDE1,PA<br>RD3,MBNL1,SKI,PRKAR2B,DDX54,AZIN1,TARDBP,L<br>ARP4,XRCC6,ABI1,PCNA,CDC25A,MBD1,CSNK2A2,D<br>DX3X,HDGF,ZNF789,VPS35,EIF4G2,MCM2,JUND,HC<br>FC1,CHEK1,AATF,CLN6,ZMPSTE24,SLTM,UBP1,TRR<br>AP,EXOSC9,CSK,DNAJA1,NUP62,XPO1,PPIA,SERPI<br>NE1,TPR,ENC1,SRSF7,TGFBAP1,ZFP36L2,SF3B4,<br>PPRC1,SLC38A2,KEAP1,TFB2M,UBE2N,BAZ1B,NRIP<br>1,MYBBP1A,DDB1,BACH2,PITX1,ASXL2,TCP1,CENP<br>F,YWHAB,RALY,ENO1,CCT5,FUBP1,POLE3,CDK6,CD<br>C5L,CHD3,BEND3,ZNF787,TFAM,PPP2CA,SSU72,MS<br>H2,CDK12,ZBTB2,GLYR1,KMT2A,MCM3,NOSTRIN,GA<br>TAD2A,DKC1,DDX1,EWSR1,DDX49,CASC3,ARID1B,C<br>PSF7,ZNF33B,HNRNPAB,KAT6A,USP36,RBBP4,CNPP<br>D1,SAFB,NCBP1,HEATR1,CCT2,HSP90AB1,EIF3B,D<br>US3L,PA2G4,HNRNPK,SMG1,PRPF19,SMARCA4,PRKD<br>C,YES1,ZNF121,TRA2B,PRMT1,HNRNPC,MALT1,WWP<br>2,SUPT16H,HMGA1,CELF1,RBMXL1,XRCC5,DDX5,PS<br>ME3,UTP4,DEK,LMO2,EIF4A3,TRIP12,IPO7,CIZ1,<br>CDT1,CORO1C,KHDRBS1,HNRNPD,LRRPRC,EIF5A,CT<br>DSP1,SUPT6H,DNAJB6,NOLC1,SREBF2,CBFA2T3,AB<br>CF1,MGA,NSUN2,HSPD1,PIM2,GAPDH,YBX1,LIN28B |
|--|------------------------------------------------------|------------|-------------------------------------------------------------------------------------------------------------------------------------------------------------------------------------------------------------------------------------------------------------------------------------------------------------------------------------------------------------------------------------------------------------------------------------------------------------------------------------------------------------------------------------------------------------------------------------------------------------------------------------------------------------------------------------------------------------------------------------------------------------------------------------------------------------------------------------------------------------------------------------------------------------------------------------------------------------------------------------------------------------------------------------------------------------------------------------------------------------------------------------------------------------------------------------------------------------------------------------------------------------------------------------------------------------------------------------------------------------------------------------------------------------------------------------------------------------------------------------------------------------------------------------------------------------------------------------------------------------------------------------------------------------------------------------------------------------------------------------------------------------------------------------------------------------------------------------------------------------------------------------------------------------------------------------------------------------------------------------------------------------------------------------------------------------------------------------------------------------------------------------------------------------------------------------------------------------------------------------------------------------------------------------------------------------------------------------------------------------------------------------------------------------------------------------------------------------------------------------------------------------------------------------------------------------------------------------------------------------------------------------------------------------------------------------------------------------------------------------------------------------------------------------------------------------------------------------------------------------------------------------------------------------------------------------------------------------------------------------------------------------------------------------------------------------------------------------------------------------------------------------------------------|

|            |                                          |                        |                                                                                                                                                                                                                                                                                                                                                                                                                                                                                                                                                                                                                                                                                                                                                                                                                                                                                                                                                                                                                                                                                                                                                                                                                                                                                                                                                                                                                                                                                                                                                                                                                                                                                                                                                                                                                                                                                                                                                                                                                                                                                                                                                                                                                                                                                                                                                                                                                                                                                                                                                                                                                                                                                                                                                                                                     |
|------------|------------------------------------------|------------------------|-----------------------------------------------------------------------------------------------------------------------------------------------------------------------------------------------------------------------------------------------------------------------------------------------------------------------------------------------------------------------------------------------------------------------------------------------------------------------------------------------------------------------------------------------------------------------------------------------------------------------------------------------------------------------------------------------------------------------------------------------------------------------------------------------------------------------------------------------------------------------------------------------------------------------------------------------------------------------------------------------------------------------------------------------------------------------------------------------------------------------------------------------------------------------------------------------------------------------------------------------------------------------------------------------------------------------------------------------------------------------------------------------------------------------------------------------------------------------------------------------------------------------------------------------------------------------------------------------------------------------------------------------------------------------------------------------------------------------------------------------------------------------------------------------------------------------------------------------------------------------------------------------------------------------------------------------------------------------------------------------------------------------------------------------------------------------------------------------------------------------------------------------------------------------------------------------------------------------------------------------------------------------------------------------------------------------------------------------------------------------------------------------------------------------------------------------------------------------------------------------------------------------------------------------------------------------------------------------------------------------------------------------------------------------------------------------------------------------------------------------------------------------------------------------------|
|            |                                          |                        | ,EIF5B,RBM3,AXIN1,ANP32B,IPO5,RREB1,EP300,TGFBR1,DAZAP1,RRP1B,FOSB,SRRT,PABPC1,SERBP1,AHNAK,SF3B3,PTMA,THRAP3,MLLT1,HNRNPF,NPM1,RIF1,CITED2,ETF1,SON,WDR43,TFRC,RUNX1,NQO1,EIF4G1,TRIM28,ACP5,U2AF2,NR2F2,BCLAF1,RSF2,HSP90AA1,NFATC3,ZNF521,CAPRIN1,MCM4,TRIM24,RESF1,HNRNPA2B1,LARP1,SQSTM1,PTBP1,CAR1,DDX21,SFPQ,PABPC4,HNRNPM,KCNH2,SRSF3,MCM7,SMARCC1,MYC,SET,BTG1,IGF2BP1,FOS,HMGC R,MYB,ODC1,KHSRP,ZEB2,RELN,FUS,ILF3,ACTB,DHX9,HNRNPU,MCM5,NCL,EGR1,DHCR24,HSPA8                                                                                                                                                                                                                                                                                                                                                                                                                                                                                                                                                                                                                                                                                                                                                                                                                                                                                                                                                                                                                                                                                                                                                                                                                                                                                                                                                                                                                                                                                                                                                                                                                                                                                                                                                                                                                                                                                                                                                                                                                                                                                                                                                                                                                                                                                                                            |
| GO:0031323 | regulation of cellular metabolic process | 1.3828894735545929e-47 | HRAS, TXK, MTF, JMJD1C, MSH3, CHTOP, ZNF274, KMT2B, SUPT7L, MACROH2A1, BRD9, MED16, NOL11, BICRA, MTA2, TIRAP, CWC22, OTUD6B, RIOX1, PHF5A, NACA, MED6, PRXL2C, CBX3, PHB, METTL3, EZH2, TCF20, DNMT1, PAXIP1, LRRFIP1, GPATCH3, RHEB, INTS6, PPP6R3, SMG5, BRD4, ZNF581, SPIN4, ZNF74, RPUSD4, CDC123, CTDP1, MED1, NVL, HNRNPL, NLN, PWP1, CHRAC1, KMT2D, TAF4B, PQBP1, PSPC1, CEP350, MAD2L2, POLDI P2, PSMC3, ZBTB40, ADNP2, ARID2, PATZ1, TRIM44, RNPS1, LHX4, ZNF512B, RBL1, PPP3R1, HIF1AN, SS18L1, MED29, HNRNPH1, USP14, LIMD1, DNMT1, LYL1, BAP1, SUB1, GTF2H1, TOP2B, LYAR, SLC39A10, CCNH, NAB2, EXOC7, EIF4EBP2, CCT6A, KAT7, EEF2, WDR5, CCT8, FUBP3, BCCIP, SPRY2, CUL3, ARPP19, NONO, MEF2C, TCF3, TEX15, MAF1, CLSPN, NBAS, CCNY, PRPF6, ZC3H4, ZNF26, ZNF24, GSPT1, GRSF1, UBQLN4, ACTR8, PSMC5, ZC3HAV1, MAPK1, STAR, CASP3, PKP3, ABT1, DHX33, CTR9, NCOA5, FADS1, ZFP91, UIMC1, PUM1, MTOR, IKZF3, KANSL1, SPEN, VDAC1, SMARCA5, EIF3D, ZNF45, RSF1, TFAP4, PRMT6, FAF1, HNRNPA0, BAG6, ZNF131, SBNO1, ZNF431, DHFR, MTDH, TCF7L2, ZNF239, PRAME, UBE2L3, THOC1, SETMAR, RPTOR, PPP1R10, HECTD1, TNF, RAVR1, EIF4B, SAMSN1, PPP2R5A, IGF2BP3, MED28, ELL2, PUM2, SSBP3, SNRPA, ZNF586, BACH1, RBM10, SETX, NFILZ, AP3D1, METTL8, APEX1, BPTF, ATP6V1G1, ICE1, RIOK2, NAA15, ARID1A, PITHD1, ZC3H14, SRSF10, C1QBP, VPS72, ZNF587B, CRK, TICRR, MED15, CAPNS1, PAK2, PRMT5, SNX9, PCBP2, RBMX, BAZ1A, WDR70, MLLT3, RAD23B, TAF4, RBM14, RBM8A, KDM3B, LRP8, SETD2, ZNF326, INTS13, ZNF282, DYRK1A, TFDP2, CUL4A, JADE2, NUCKS1, SDCBP, CDC37, GNLSL, NSRP1, TFIP11, WAC, DHX29, ARHGEF2, BRCA2, POLR2D, WTAP, COPS2, BCL7B, RBM42, ZFX, PAN3, MED13L, PAF1, ZC3H18, FASTKD2, PHB2, TCOF1, GRB10, PDS5A, BRCC3, ZNF75A, SMARCB1, CREBBP, EXOSC3, EPRS1, INSIG1, LSM14A, NUP98, CNOT1, LYN, ASH1L, GEMIN5, PLAGL2, APC, CAPN1, WDR6, NFYC, SF1, PELP1, EZR, TRIB2, DDX20, MMS19, ELOA, TAF9, YWHAG, ELAVL1, UTP15, VCP, RYBP, SAFB2, DHX34, PSIP1, RBM12, CDK4, DVL2, POLR3C, RBM25, SCAP, WDR82, AGO2, E2F4, VPS26A, RNF220, TBC1D14, MCM6, IER3, ATP6V0D1, ADNP, NFKB1, UBTX, ZNF622, BRD2, CHD7, RBM15B, USP37, HNRNPA1, PPARGC1B, MAGOH, PBRM1, CTCF, HHEX, ANKRD17, ELF1, ZNF614, NSD1, RSL1D1, CCT3, CDK7, PPIF, PKM, FOXK2, HMGB1, BZW1, SMARCD1, GNAQ, YY1, MLLT10, IRAK1, PUS7, NAT10, TRMT10C, SRSF6, EP400, CEBPZ, LEPR, MECP2, CSDE1, PARD3, MBNL1, SKI, PRKAR2B, DDX54, TARDBP, LARP4, XRCC6, ABI1, PCNA, CDC25A, MBD1, CSNK2A2, DDX3X, HDGF, ZNF789, VPS35, EIF4G2, MCM2, JUND, HCFC1, CHEK1, AATF, ZMPSTE24, SLC25A5, SLTM, VAC14, UBP1, TRRAP, EXOSC9, CSK, DNAJA1, NUP62, XPO1, PPIA, TPR, ENC1, SRSF7, TGFBRAP1, ZFP36L2, SF3B4, STK17A, PPRC1, SLC38A2, KEAP1, TFB2M, UBE2N, BAZ1B, NRIP1, MYBBP1A, DDB1, BACH2, PITX1, ASXL2, TCP1, CENPF, YWHAB, RALY, ENO1 |

|            |                                                      |                           |                                                                                                                                                                                                                                                                                                                                                                                                                                                                                                                                                                                                                                                                                                                                                                                                                                                                                                                                                                                                                                                                                                                                                                                                                                                                                                                                                                                                                                                                                                                                                                                                                                                                                                                                                                                                                                                                                                                                                                                                                                                                                                                                                                   |
|------------|------------------------------------------------------|---------------------------|-------------------------------------------------------------------------------------------------------------------------------------------------------------------------------------------------------------------------------------------------------------------------------------------------------------------------------------------------------------------------------------------------------------------------------------------------------------------------------------------------------------------------------------------------------------------------------------------------------------------------------------------------------------------------------------------------------------------------------------------------------------------------------------------------------------------------------------------------------------------------------------------------------------------------------------------------------------------------------------------------------------------------------------------------------------------------------------------------------------------------------------------------------------------------------------------------------------------------------------------------------------------------------------------------------------------------------------------------------------------------------------------------------------------------------------------------------------------------------------------------------------------------------------------------------------------------------------------------------------------------------------------------------------------------------------------------------------------------------------------------------------------------------------------------------------------------------------------------------------------------------------------------------------------------------------------------------------------------------------------------------------------------------------------------------------------------------------------------------------------------------------------------------------------|
|            |                                                      |                           | , CCT5, FUBP1, POLE3, CDK6, CDC5L, CHD3, BEND3, WD R81, ZNF787, TFAM, PPP2CA, SSU72, MSH2, CDK12, ZB TB2, GLYR1, KMT2A, MCM3, NOSTRIN, SLC30A10, GATA D2A, DKC1, DDX1, EWSR1, DDX49, CASC3, ARID1B, CPS F7, ZNF33B, ATP6V0A1, HNRNPAB, KAT6A, USP36, RBB P4, CNPPD1, SAFB, NCBP1, HEATR1, CCT2, HSP90AB1, EIF3B, DUS3L, PA2G4, HNRNPK, SMG1, PRPF19, SMARC A4, PRKDC, YES1, ZNF121, TRA2B, PRMT1, HNRNPC, MA LT1, WWP2, SUPT16H, HMGA1, CELF1, RBMXL1, XRCC5, DDX5, UTP4, DEK, LMO2, EIF4A3, TRIP12, IPO7, CIZ1, CDT1, CORO1C, KHDRBS1, HNRNPD, LRPPRC, EIF5A, C TDSP1, SUPT6H, RANBP2, DNAJB6, NOLC1, SREBF2, C FA2T3, ABCF1, MGA, NSUN2, PIM2, GAPDH, YBX1, LIN2 8B, EIF5B, ATP6V1C1, RBM3, AXIN1, IPO5, RREB1, EP 300, TGFBR1, DAZAP1, RRP1B, FOSB, SRRT, PABPC1, S ERBP1, AHNAK, SF3B3, PTMA, THRAP3, MLLT1, HNRNPF, NPM1, RIF1, CITED2, ETF1, SON, WDR43, TFRC, RUNX 1, EIF4G1, TRIM28, ACP5, U2AF2, NR2F2, BCLAF1, SR SF2, HSP90AA1, NFATC3, ZNF521, CAPRIN1, MCM4, TR IM24, RESF1, HNRNPA2B1, LARP1, SQSTM1, PTBP1, CC AR1, DDX21, SFPQ, PABPC4, HNRNPM, KCNH2, SRSF3, M CM7, SMARCC1, MYC, SET, BTG1, IGF2BP1, FOS, HMCCR, MYB, KHSRP, ZEB2, RELN, FUS, ILF3, ACTB, DHX9, HN RNPU, MCM5, NCL, EGR1, HSPA8                                                                                                                                                                                                                                                                                                                                                                                                                                                                                                                                                                                                                                                                                                                                                                                                                                                                                                                                                 |
| GO:0080090 | regulatio<br>n of<br>primary<br>metabolic<br>process | 2.662849153<br>270026e-47 | HRAS, TXK, MTF, JMJD1C, MSH3, CHTOP, ZNF274, KMT 2B, SUPT7L, MACROH2A1, BRD9, MED16, NOL11, BICRA, MTA2, TIRAP, CWC22, OTUD6B, RIOX1, PHF5A, NACA, MED6, PRXL2C, CBX3, PHB, METTL3, EZH2, TCF20, DNM 1L, PAXIP1, LRRFIP1, GPATCH3, INTS6, PPP6R3, SMG 5, BRD4, ZNF581, SPIN4, ZNF74, RPUSD4, CDC123, CT DP1, MED1, NVL, HNRNPL, NLN, PWP1, CHAC1, KMT2D, CASP8, TAF4B, PSMA3, PQBP1, PSMD3, PSCP1, CEP350, MAD2L2, PSMC3, ZBTB40, ADNP2, ARID2, PATZ1, TRI M44, RNPS1, LHX4, ZNF512B, RBL1, PPP3R1, HIF1AN, SS18L1, MED29, HNRNPH1, USP14, RAB7A, LIMD1, DNM T1, LYL1, BAP1, SUB1, GTF2H1, BUB3, TOP2B, LYAR, S LC39A10, CCNH, NAB2, EIF4EBP2, CCT6A, KAT7, CLTC, EEF2, AURKAIP1, WDR5, CCT8, FUBP3, BCCIP, SPRY2, RNF40, CUL3, ARPP19, NONO, MEF2C, UBR3, TCF3, TE X15, MAF1, CLSPN, NBAS, CCNY, CRIM1, PRPF6, ZC3H4, PEBP1, ZNF26, ZNF24, GSPT1, GRSF1, UBQLN4, ACTR 8, PSMC5, ZC3HAV1, MAPK1, STAR, CASP3, PKP3, ABT1, CERS2, DHX33, CTR9, NCOA5, FADS1, ZFP91, UIMC1, PUM1, MTOR, IKZF3, KANSL1, SPEN, SMARCA5, EIF3D, ZNF45, RSF1, TFAP4, DELE1, PRMT6, TSPYL5, FAF1, H NRNPA0, BAG6, ZNF131, SBNO1, ZNF431, DHFR, MTDH, TCF7L2, ZNF239, PRAME, UBE2L3, THOC1, PSMC2, SET MAR, RPTOR, PPP1R10, HECTD1, TNF, RAVER1, EIF4B, SAMSN1, PPP2R5A, IGF2BP3, MED28, ELL2, PUM2, SSB P3, SNRPA, ZNF586, BACH1, RBM10, SETX, NFILZ, AP3 D1, METTL8, APEX1, BPTF, ICE1, RIOK2, NAA15, ARID 1A, PITHD1, ZC3H14, SRSF10, AKAP8, C1QBP, VPS72, ZNF587B, CRK, TICRR, MED15, PAK2, PRMT5, SNX9, PC BP2, RBMX, BAZ1A, WDR70, MLLT3, OPA3, RAD23B, TAF 4, RBM14, RBM8A, KDM3B, GOLM1, LRP8, SETD2, ZNF32 6, INTS13, ZNF282, DYRK1A, TFDP2, CUL4A, JADE2, N UCKS1, SDCBP, PSMD1, CDC37, GNL3L, RILP, NSRP1, T FIP11, WAC, DHX29, ARHGEF2, IL17D, BRCA2, POLR2D, WTAP, COPS2, BCL7B, RBM42, ZFX, PAN3, MED13L, PA F1, ZC3H18, BIRC6, FASTKD2, PHB2, TCOF1, PDS5A, B RCC3, ZNF75A, SMARCB1, CREBBP, EXOSC3, EPRS1, CO PS3, INSIG1, LSM14A, NUP98, CNOT1, LYN, ASH1L, GE MIN5, PLAGL2, APC, NFYC, SF1, PELP1, EZR, TRUB2, D DX20, MMS19, ELOA, TAF9, YWHAG, ELAVL1, UTP15, VC P, RYBP, SAFB2, DHX34, PSIP1, CSTB, BEX4, RBM12, C DK4, DVL2, POLR3C, RBM25, SCAP, WDR82, AGO2, E2F4 |

|            |                         |                        |                                                                                                                                                                                                                                                                                                                                                                                                                                                                                                                                                                                                                                                                                                                                                                                                                                                                                                                                                                                                                                                                                                                                                                                                                                                                                                                                                                                                                                                                                                                                                                                                                                                                                               |
|------------|-------------------------|------------------------|-----------------------------------------------------------------------------------------------------------------------------------------------------------------------------------------------------------------------------------------------------------------------------------------------------------------------------------------------------------------------------------------------------------------------------------------------------------------------------------------------------------------------------------------------------------------------------------------------------------------------------------------------------------------------------------------------------------------------------------------------------------------------------------------------------------------------------------------------------------------------------------------------------------------------------------------------------------------------------------------------------------------------------------------------------------------------------------------------------------------------------------------------------------------------------------------------------------------------------------------------------------------------------------------------------------------------------------------------------------------------------------------------------------------------------------------------------------------------------------------------------------------------------------------------------------------------------------------------------------------------------------------------------------------------------------------------|
|            |                         |                        | ,RNF220,SAE1,MCM6,DHCR7,IER3,ADNP,UBA2,NFKB1,UBTF,BRD2,CHD7,RBM15B,USP37,HNRNPA1,PPARGC1B,MAGOH,PBRM1,CTCF,HHEX,ANKRD17,ELF1,ZNF614,NSD1,CCT3,CDK7,PKM,FO XK2,HMGB1,BZW1,SMARCD1,GNAQ,YY1,MLLT10,IRAK1,PUS7,NAT10,T RMT10C,SRSF6,EP400,CEBPZ,LEPR,MECP2,CSDE1, PARD3,MBNL1,SKI,PRKAR2B,DDX54,AZIN1,TARDBP ,LARP4,XRCC6,ABI1,PCNA,CDC25A,MBD1,CSNK2A2 ,DDX3X,HDGF,ZNF789,VPS35,EIF4G2,MCM2,JUND, HCFC1,CHEK1,AATF,CLN6,ZMPSTE24,SLTM,UBP1,T RRAP,EXOSC9,CSK,DNAJA1,NUP62,XPO1,PPIA,SER PINE1,TPR,ENC1,SRSF7,TGFBRAP1,ZFP36L2,SF3B 4,PPRC1,SLC38A2,KEAP1,TFB2M,UBE2N,BAZ1B,NR IP1,MYBBP1A,DDDB1,BACH2,PITX1,ASXL2,TCP1,CE NPF,YWHAB,RALY,ENO1,CCT5,FUBP1,POLE3,CDK6, CDC5L,CHD3,BEND3,ZNF787,TFAM,PPP2CA,SSU72, MSH2,CDK12,ZBTB2,GLYR1,KMT2A,MCM3,NOSTRIN, GATAD2A,DKC1,DDX1,EWSR1,DDX49,CASC3,ARID1B ,CPSF7,ZNF33B,HNRNPAB,KAT6A,USP36,RBBP4,CN PPD1,SAFB,NCBP1,HEATR1,CCT2,HSP90AB1,EIF3B ,DUS3L,PA2G4,HNRNPK,SMG1,PRPF19,SMARCA4,PR KDC,YES1,ZNF121,TRA2B,PRMT1,HNRNPC,MALT1,W WP2,SUPT16H,HMGA1,CELF1,RBMXL1,XRCC5,DDX5, PSME3,UTP4,DEK,LMO2,EIF4A3,TRIP12,IPO7,CIZ 1,CDT1,CORO1C,KHDRBS1,HNRNPD,LRPPRC,EIF5A, CTDSP1,SUPT6H,RANBP2,DNAJB6,NOLC1,SREBF2,C BFA2T3,ABCF1,MGA,NSUN2,HSPD1,PIM2,GAPDH,YB X1,LIN28B,EIF5B,RBM3,AXIN1,ANP32B,IPO5,RRE B1,EP300,TGFBR1,DAZAP1,RRP1B,FOSB,SRRT,PAB PC1,SERBP1,AHNAK,SF3B3,PTMA,THRAP3,MLLT1,H NRNPF,NPM1,RIF1,CITED2,ETF1,SON,WDR43,TFRC ,RUNX1,NQO1,EIF4G1,TRIM28,U2AF2,NR2F2,BCLA F1,SRSF2,HSP90AA1,NFATC3,ZNF521,CAPRIN1,MC M4,TRIM24,RESF1,HNRNPA2B1,LARP1,SQSTM1,PTB P1,CCAR1,DDX21,SFPQ,PABPC4,HNRNPM,KCNH2,SR SF3,MCM7,SMARCC1,MYC,SET,BTG1,IGF2BP1,FOS, HMGC,MYB,ODC1,KHSRP,ZEB2,RELN,FUS,ILF3,AC TB,DHX9,HNRNPU,MCM5,NCL,EGR1,DHCR24,HSPA8 |
| GO:0034660 | ncRNA metabolic process | 3.9518264366669384e-47 | HRAS,NOP14,PPAN,MACROH2A1,NOL11,UTP3,MTREX ,METTL3,NOC4L,INTS6,RRP9,MRPL1,RPUSD4,NUP1 55,NVL,PWP1,WDR46,TRNT1,ZNF512B,RPUSD1,DUS 1L,LYAR,TSR3,IMP4,NOB1,NOL9,ZC3H4,GRSF1,PO LR1E,ABT1,WDR36,PUM1,MTOR,UTP18,NIFK,TNF,T RMT61A,ELL2,PUM2,WDR3,DDX10,TRMT2A,METTL8, ICE1,RIOK2,SBDS,WDR74,TRMT6,BOP1,INTS13,TR MO,WDR12,GTF3C6,UTP25,SSB,ZC3H7B,TCOF1,SM A RCB1,TRIR,EXOSC3,WBP11,EPRS1,POLR1B,WDR6,P ELP1,XRN2,TRUB2,URM1,DDX51,UTP15,DCAF13,TH G1L,RRP12,WDR82,AGO2,RRP36,DDX18,NFKB1,CHD 7,GAR1,RRS1,RSL1D1,CDK7,YY1,NOL8,PUS7,NAT1 0,TRMT10C,SNU13,SART1,RRP15,DDX54,DDX3X,ZM PSTE24,URB1,EXOSC9,TSR1,UTP20,EBNA1BP2,TFB 2M,MRT04,GTF3C4,LRRC47,DKC1,DDX1,THUMPD1,D DX49,RRP1,USP36,NCBP1,HEATR1,DUS3L,PA2G4,D HX37,SMARCA4,PRKDC,FARSA,DDX5,UTP4,EIF4A3, DDX56,NOP56,NOLC1,SREBF2,NSUN2,LIN28B,MPHO SPH10,PES1,RRP1B,SRRT,WDR43,MDN1,NFATC3,TR MT1,NOP58,HNRNPA2B1,DDX21,SRSF3,MYC,FOS,MY B,KHSRP,NCL,EGR1                                                                                                                                                                                                                                                                                                                                                                                                                                                                                                                                                                                                                                                                                                                                                                                 |
| GO:0042254 | ribosome biogenesis     | 4.738824971283475e-47  | NOP14,PPAN,ERAL1,NOL11,UTP3,MTREX,NOC4L,RR P9,MRPL1,RPUSD4,NVL,PWP1,WDR46,NOP16,RPUSD 1,LYAR,TSR3,IMP4,NOB1,NOL9,ABT1,WDR36,SDAD 1,DHX30,UTP18,NIFK,NIP7,WDR3,DDX10,RIOK2,S BDS,C1QBP,WDR74,BOP1,WDR12,URB2,CUL4A,UTP2 5,GNL3L,DHX29,FASTKD2,EXOSC3,WBP11,PELP1,X RN2,DDX51,UTP15,DCAF13,MRPS2,RRP12,GNL2,RR                                                                                                                                                                                                                                                                                                                                                                                                                                                                                                                                                                                                                                                                                                                                                                                                                                                                                                                                                                                                                                                                                                                                                                                                                                                                                                                                                                                  |

|            |                                                 |                      |                                                                                                                                                                                                                                                                                                                                                                                                                                                                                                                                                                                                                                                                                                                                                                                                                                                                                                                                                                                                                                                                                                                                                                                                                                                                                                                                                                                                                                                                                                                                                                                                                                                                                                                                                                                                                                                                                                                                                                                                                                                                                                                                                                                                                                                                                                                                                                                                                                                                                                                              |
|------------|-------------------------------------------------|----------------------|------------------------------------------------------------------------------------------------------------------------------------------------------------------------------------------------------------------------------------------------------------------------------------------------------------------------------------------------------------------------------------------------------------------------------------------------------------------------------------------------------------------------------------------------------------------------------------------------------------------------------------------------------------------------------------------------------------------------------------------------------------------------------------------------------------------------------------------------------------------------------------------------------------------------------------------------------------------------------------------------------------------------------------------------------------------------------------------------------------------------------------------------------------------------------------------------------------------------------------------------------------------------------------------------------------------------------------------------------------------------------------------------------------------------------------------------------------------------------------------------------------------------------------------------------------------------------------------------------------------------------------------------------------------------------------------------------------------------------------------------------------------------------------------------------------------------------------------------------------------------------------------------------------------------------------------------------------------------------------------------------------------------------------------------------------------------------------------------------------------------------------------------------------------------------------------------------------------------------------------------------------------------------------------------------------------------------------------------------------------------------------------------------------------------------------------------------------------------------------------------------------------------------|
|            |                                                 |                      | <p>P36,DDX18,ZNF622,CHD7,GAR1,RRS1,RSL1D1,NOL8,NAT10,SNU13,SART1,RRP15,DDX54,DDX3X,AATF,URB1,EXOSC9,TSR1,XPO1,UTP20,EBNA1BP2,TFB2M,MRT04,MYBBP1A,RAN,GRWD1,DKC1,DDX49,RRP1,USP36,HEATR1,PA2G4,DHX37,PRKDC,XRCC5,UTP4,EIF4A3,SURF6,DDX56,NOP56,NOLC1,MPHOSPH10,PES1,RRP1B,NPM1,WDR43,MDN1,NOP58,DDX21,GLUL</p>                                                                                                                                                                                                                                                                                                                                                                                                                                                                                                                                                                                                                                                                                                                                                                                                                                                                                                                                                                                                                                                                                                                                                                                                                                                                                                                                                                                                                                                                                                                                                                                                                                                                                                                                                                                                                                                                                                                                                                                                                                                                                                                                                                                                                |
| GO:0044271 | cellular nitrogen compound biosynthetic process | 7.22575707518893e-47 | <p>HRAS,TXX,ACSF3,MITF,JMJD1C,DAP3,TRIP13,ZNF274,KMT2B,SUPT7L,MACROH2A1,BRD9,MED16,NOL11,BICRA,MTA2,TIRAP,POLR3E,OTUD6B,RIOX1,PHF5A,NACA,POLR1C,MED6,CBX3,PHB,METTL3,EZH2,TCF20,PAXIP1,LRRFIP1,GPATCH3,INTS6,SMG5,BRD4,PTDSS2,MRPL1,ZNF581,SPIN4,ZNF74,MRPL11,RPUSD4,DENR,CDC123,HROB,MRPS30,CTDP1,MED1,NVL,SRM,HNRNPL,PWP1,CHRA1,CRCP,KMT2D,TAF4B,PQBP1,PSPC1,CEP350,MAD2L2,MRRF,POLDIP2,PSMC3,ZBTB40,ADNP2,GART,ARID2,PATZ1,TRIM44,RNPS1,LHX4,ZNF512B,RBL1,PPP3R1,HIF1AN,SS18L1,MED29,USP14,LIMD1,DNMT1,LYL1,PPP5C,BAP1,SUB1,GTTF2H1,TOP2B,LYAR,CCNH,NAB2,EIF4EBP2,CCT6A,KAT7,EEF2,AURKAIP1,WDR5,CCT8,FUBP3,DLAT,CUL3,CMPK1,NONO,MEF2C,TCF3,MAF1,PRPF6,ZC3H4,ZNF26,ZNF24,GSPT1,ACTR8,PSMC5,MAPK1,EEF1D,POLR1E,ABT1,PCLAF,CERS2,DHX33,CTR9,NCOA5,FADS1,ZFP91,UIMC1,PUM1,MTOR,IKZF3,KANSL1,SPEN,SMARCA5,EIF3D,ZNF45,RSF1,TFAP4,PRMT6,NIFK,FAF1,ZNF131,SBNO1,ZNF431,DHFR,MTDH,TCF7L2,ZNF239,MRPL15,PRAME,GMPS,ASCC3,UROD,UBE2L3,THOC1,RPTOR,MRPS35,TNF,EIF4B,IGF2BP3,MED28,ELL2,PUM2,MT-TL1,SSBP3,ZNF586,BACH1,RBM10,SETX,NFILZ,AP3D1,METTL8,APEX1,BPTF,ICE1,NAA15,ARID1A,PI3D1,B4GALT5,SRSF10,C1QBP,VPS72,ZNF587B,CRK,MED15,PRMT5,PCBP2,RBMX,BAZ1A,MLLT3,TAF4,RBM14,RBM8A,KDM3B,LRP8,SETD2,ZNF326,INTS13,UCK2,ZNF282,DYRK1A,PHF3,TFDP2,GTFC3C6,SLBP,JADE2,NUCKS1,SDCBP,AMD1,GNL3L,CYB5B,IBA57,MT-TF,WAC,EIF3G,DHX29,ARHGEF2,BRCA2,POLR2D,EIF3M,COPS2,BCL7B,ZFX,ACLY,PAN3,MED13L,PAF1,FASTKD2,PHB2,TCOF1,ZNF75A,SMARCB1,CREBBP,EXOSC3,EPRS1,LSM14A,NUP98,CNOT1,ASH1L,GEMIN5,PLAGL2,POLR1B,ELOF1,NFYC,SF1,PELP1,XRN2,EZR,TRUB2,DDX20,MMS19,ELOA,TAF9,ELAVL1,UTP15,VCP,RYBP,SAFB2,PSIP1,CDK4,DVL2,POLR3C,MRPS2,WDR82,AGO2,E2F4,RNF220,ADNP,NFKB1,UBTF,BRD2,CHD7,HNRNPA1,GAR1,PPARGC1B,MAGOH,PBRM1,CTCF,HHEX,RRM2,RRM1,ELF1,ZNF614,NSD1,CT3,CDK7,PKM,FOXK2,HMGB1,BZW1,SMARCD1,YY1,MLLT10,IRAK1,PUS7,NAT10,TRMT10C,EP400,MTHFD1,ADSS2,CEBPZ,MECP2,CSDE1,SKI,DDX54,AZIN1,TARDBP,LARP4,XRCC6,RPL22,PCNA,MBD1,DDX3X,HDGF,ZNF789,VPS35,ATP5MC3,EIF4G2,JUND,PFAS,HCFC1,CHEK1,AATF,ZMPSTE24,SLTM,UBP1,POLE,TRRAP,EXOSC9,POLR2A,NUP62,PPIA,TPR,ENC1,TGFBRAP1,ZFP36L2,PPRC1,KEAP1,TFB2M,UBE2N,BAZ1B,NRIP1,VAPA,GFM1,MYBBP1A,BACH2,PITX1,CTF3C4,LRRC47,ASXL2,TCF1,CENPF,RALY,ENO1,CCT5,FUBP1,POLE3,CDK6,CDC5L,CHD3,ST3GAL2,BEND3,ZNF787,TFAM,AK2,PPP2CA,SSU72,CDK12,ZBTB2,DIDO1,GLYR1,KMT2A,NOSTRIN,PAICS,ZNF598,CERS6,GATAD2A,DKC1,DDX1,CTPS1,EWSR1,CASC3,ARID1B,ZNF33B,HNRNPAB,KAT6A,RBBP4,SAFB,NCBP1,HEATR1,CCT2,HSP90AB1,EIF3B,DUS3L,PA2G4,HNRNPK,SMARCA4,EIF3J,PRKDC,YES1,ZNF121,HNRNPC,MALT1,WWP2,SUPT16H,HMGA1,FARSA,CELF1,XRCC</p> |

|            |                                        |                        |                                                                                                                                                                                                                                                                                                                                                                                                                                                                                                                                                                                                                                                                                                                                                                                                                                                                                                                                                                                                                                                                                                                                                                                                                                                                                                                                                                                                                                                                                                                                                                                                                                                                                                                                                                                                                                                                                                                                                                                                                                                                                                                                                                                                                             |
|------------|----------------------------------------|------------------------|-----------------------------------------------------------------------------------------------------------------------------------------------------------------------------------------------------------------------------------------------------------------------------------------------------------------------------------------------------------------------------------------------------------------------------------------------------------------------------------------------------------------------------------------------------------------------------------------------------------------------------------------------------------------------------------------------------------------------------------------------------------------------------------------------------------------------------------------------------------------------------------------------------------------------------------------------------------------------------------------------------------------------------------------------------------------------------------------------------------------------------------------------------------------------------------------------------------------------------------------------------------------------------------------------------------------------------------------------------------------------------------------------------------------------------------------------------------------------------------------------------------------------------------------------------------------------------------------------------------------------------------------------------------------------------------------------------------------------------------------------------------------------------------------------------------------------------------------------------------------------------------------------------------------------------------------------------------------------------------------------------------------------------------------------------------------------------------------------------------------------------------------------------------------------------------------------------------------------------|
|            |                                        |                        | <p>5,DDX5,UTP4,DEK,LMO2,EIF4A3,DDX56,KHDRBS1,HNRNPD,LRP1,EIF5A,CTDSP1,SUPT6H,DNAJB6,NOLC1,SREBF2,CBFA2T3,ABCF1,ACACA,MGA,PIM2,GAPDH,YBX1,EIF5B,RBM3,AXIN1,RREB1,EP300,TGFBF1,RRP1B,FOSB,SRRT,PABPC1,SF3B3,PTMA,THRAP3,MLLT1,ELOVL6,MT-ND1,NPM1,RIF1,CITED2,ETF1,WDR43,TFRC,RUNX1,NQO1,EIF4G1,TRIM28,ACP5,NR2F2,BCLAF1,SRSF2,HSP90AA1,NFATC3,ZNF521,CAPRIN1,TRIM24,RESF1,HNRNPA2B1,LARP1,SQSTM1,CCAR1,DDX21,SFPQ,PABPC4,POLR1A,KCNH2,EIF3A,SMARCC1,MYC,SET,BTG1,IGF2BP1,FOS,GCLM,SPTA1,MYB,ODC1,KHSRP,ZEB2,RELN,FUS,ILF3,ACTB,DHX9,HNRNPU,NCL,EGR1,HSPA8</p>                                                                                                                                                                                                                                                                                                                                                                                                                                                                                                                                                                                                                                                                                                                                                                                                                                                                                                                                                                                                                                                                                                                                                                                                                                                                                                                                                                                                                                                                                                                                                                                                                                                                 |
| GO:1901576 | organic substance biosynthetic process | 2.0323421997065126e-44 | <p>HRAS,TKK,ACSF3,MITF,JMJD1C,DAP3,TRIP13,ZNF274,GYG1,KMT2B,SUPT7L,MACROH2A1,BRD9,MED16,FADS2,NOL11,BICRA,MTA2,TIRAP,POLR3E,OTUD6B,RIOX1,PHF5A,NACA,POLR1C,MED6,CBX3,PHB,TTL3,EZH2,TCF20,PAXIP1,LRRFIP1,GPATCH3,INTS6,FUT8,SMG5,BRD4,STT3A,PTDSS2,DHDDS,MRPL1,ZNF581,SPIN4,ZNF74,SH3YL1,MRPL11,RPUSD4,DENR,CDC123,HROB,MRPS30,CTDP1,MED1,NVL,SRM,HNRNPL,NLN,PWP1,DOLPP1,CHRA1,CRCP,KMT2D,TAF4B,PQBP1,PSPC1,CEP350,MAD2L2,MRRF,POLDIP2,PSMC3,ZBTB40,ADNP2,GART,ARID2,PATZ1,TRIM44,RNPS1,LHX4,ZNF512B,RBL1,PPP3R1,HIF1AN,SS18L1,MED29,USP14,LIMD1,DNMT1,LYL1,PPP5C,BAP1,SUB1,GT2F2H1,TP2B,LYAR,CCNH,NAB2,EIF4EBP2,CCT6A,KAT7,CLTC,EEF2,AURKAIP1,WDR5,CCT8,FUBP3,DLAT,CUL3,ARPP19,CMPK1,NONO,MEF2C,TCF3,MAF1,MVK,PRPF6,ZC3H4,ZNF26,ZNF24,GSPT1,ACTR8,PSMC5,AGPAT3,MAPK1,STAR,EEF1D,POLR1E,ABT1,PCLAF,PDSS1,CERS2,DHX33,CTR9,NCOA5,FADS1,ZFP91,UIMC1,PUM1,MTOR,IKZF3,KANSL1,SPEN,LCLAT1,GOT2,SMARCA5,EIF3D,ZNF45,RSF1,TFAP4,PRMT6,NIFK,FAF1,ZNF131,PCYT1A,SBNO1,ZNF431,DHFR,MTDH,TCF7L2,ZNF239,NSDHL,MRPL15,PRAME,GMPS,ASCC3,UROD,UBE2L3,THOC1,RPTOR,MRPS35,TNF,EIF4B,IGF2BP3,MED28,ELL2,PUM2,MT-TL1,SSBP3,ZNF586,BACH1,RBM10,SETX,NFILZ,AP3D1,METTL8,APEX1,BPTF,ICE1,NAA15,ARID1A,PI3K,THD1,B4GALT5,SRSF10,C1QBP,VPS72,ZNF587B,CRK,MED15,EOGT,PRMT5,PCBP2,PTDSS1,RBMX,BAZ1A,GPX4,MLLT3,ALG8,TAF4,RBM14,RBM8A,KDM3B,LRP8,SETD2,ZNF326,INTS13,UCK2,ZNF282,DYRK1A,PHF3,TFDP2,GT2F3C6,SLBP,JADE2,NUCKS1,SDCBP,AMD1,AGPAT5,GNL3L,IBA57,MT-TF,WAC,EIF3G,ADI1,DHX29,ARHGEF2,BRCA2,POLR2D,ZDHHC5,EIF3M,COPS2,BCL7B,ZFX,ACLY,PAN3,MED13L,PAF1,FASTKD2,PHB2,TCOF1,ZNF75A,SMARCB1,CREBBP,EXOSC3,EPRS1,INSIG1,LSM14A,NUP98,CNOT1,ASH1L,GEMIN5,PLAGL2,POLR1B,ELOF1,NFYC,SF1,PELP1,XRN2,EZR,TRUB2,DDX20,MMS19,SGPP2,ELOA,TAF9,ELAVL1,UTP15,VCP,RYBP,SAFB2,PSIP1,CSNK1G2,CDK4,DVL2,POLR3C,MRPS2,SCAP,WDR82,AGO2,E2F4,RNF220,DHCR7,ADNP,NFKB1,UBTF,BRD2,CHD7,HNRNPA1,GAR1,PPARGC1B,MAGOH,PBRM1,CTCF,HHEX,RRM2,RRM1,PI4KA,ELF1,ZNF614,NSD1,CCT3,CDK7,PKM,FOXK2,HMGB1,BZW1,SMARCD1,YY1,MLLT10,IRAK1,PUS7,PIK3C2B,IP6K1,NAAT10,TRMT10C,EP400,AASDHPPT,MTHFD1,ADSS2,CEBPZ,LEPR,MECP2,CSDE1,SKI,TKT,DDX54,AZIN1,TARDBP,LARP4,XRCC6,RPL22,PCNA,MBD1,DDX3X,IDI1,LBR,HDGF,ZNF789,VPS35,ATP5MC3,EIF4G2,JUND,PFAS,HCFC1,CHEK1,AATF,ZMPSTE24,SLTM,VAC</p> |

|            |                      |                        |                                                                                                                                                                                                                                                                                                                                                                                                                                                                                                                                                                                                                                                                                                                                                                                                                                                                                                                                                                                                                                                                                                                                                                                                                                                                                                                                                                                                                                                                                                                                                                                  |
|------------|----------------------|------------------------|----------------------------------------------------------------------------------------------------------------------------------------------------------------------------------------------------------------------------------------------------------------------------------------------------------------------------------------------------------------------------------------------------------------------------------------------------------------------------------------------------------------------------------------------------------------------------------------------------------------------------------------------------------------------------------------------------------------------------------------------------------------------------------------------------------------------------------------------------------------------------------------------------------------------------------------------------------------------------------------------------------------------------------------------------------------------------------------------------------------------------------------------------------------------------------------------------------------------------------------------------------------------------------------------------------------------------------------------------------------------------------------------------------------------------------------------------------------------------------------------------------------------------------------------------------------------------------|
|            |                      |                        | <p>14,UBP1,POLE,TRRAP,PIIP5K2,EXOSC9,POLR2A,NUP62,PPIA,TPR,ENC1,TGFBAP1,ZFP36L2,PPRC1,KEAP1,TFB2M,UBE2N,BAZ1B,NRIP1,VAPA,GFM1,MYBBP1A,DDB1,BACH2,PITX1,UTF3C4,LRRC47,ASXL2,CHST3,TCP1,CENPF,RALY,ENO1,CCT5,FUBP1,POL E3,CDK6,CDC5L,CHD3,ST3GAL2,BEND3,ZNF787,TFAM,AK2,PPP2CA,SSU72,CDK12,ZBTB2,DID01,GLYR1,MAN2A2,KMT2A,NOSTRIN,PAICS,ZNF598,CERS6,GATAD2A,DKC1,DDX1,CTPS1,EWSR1,CASC3,ARID1B,ZNF33B,HNRNPAB,KAT6A,RBBP4,SAFB,NCBP1,HEATR1,CCT2,HSP90AB1,EIF3B,DUS3L,PA2G4,HNRNPK,SMG1,FDFT1,PRPF19,SMARCA4,EIF3J,PRKDC,YES1,ZNF121,PRMT1,HNRNPC,MALT1,WWP2,SUPT16H,HMGA1,FARSA,CELF1,XRCC5,DDX5,UTP4,DEK,LMO2,LSS,EIF4A3,NDST1,DDX56,SLC38A1,KHDRBS1,HNRNPD,LRPPRC,EIF5A,CTDSP1,SUPT6H,RANBP2,DNAJB6,NOLC1,SREBF2,CBFA2T3,ABCF1,ACACA,MGA,PI M2,GAPDH,YBX1,EIF5B,PCYT2,RBM3,PGD,AXIN1,RREB1,HSPH1,EP300,TGFBP1,RRP1B,FOSB,SRRT,PA BPC1,SF3B3,PTMA,THRAP3,MLLT1,ELOVL6,MT-ND1,NPM1,RIF1,CITED2,ETF1,WDR43,TFRC,RUNX1,EIF4G1,TRIM28,NR2F2,BCLAF1,SRSF2,HSP90AA1,NFATC3,ZNF521,CAPRIN1,SQLE,TRIM24,RESF1,HNRNPA2B1,LARP1,SQSTM1,CCAR1,MAT2A,DDX21,HMGCS1,SFPQ,SCD,PABPC4,POLR1A,KCNH2,EIF3A,SMARCC1,MYC,SET,BTG1,IGF2BP1,FOS,GCLM,HMGCR,SPTA1,MYB,ODC1,KHSRP,ZEB2,RELN,FUS,ILF3,FASN,GLUL,ACTB,DHX9,HNRNPU,NCL,EGR1,DHCR24,HSPA8</p>                                                                                                                                                                                                                                                                                                                                               |
| GO:0009058 | biosynthetic process | 3.2624366353004245e-44 | <p>HRAS,TXK,ACSF3,MITF,JMJD1C,DAP3,TRIP13,ZNF274,GYG1,KMT2B,SUPT7L,MACROH2A1,BRD9,MED16,FADS2,NOL11,BICRA,MTA2,TIRAP,POLR3E,OTUD6B,RIOX1,PHF5A,NACA,POLR1C,MED6,CBX3,PHB,ME TTL3,EZH2,TCF20,PAXIP1,LRRFIP1,GPATCH3,INTS6,FUT8,SMG5,BRD4,STT3A,PTDSS2,DHDDS,MRPL1,ZNF581,SPIN4,ZNF74,SH3YL1,MRPL11,RPUSD4,DENR,CDC123,HROB,MRPS30,CTDP1,MED1,NVL,SRM,HNRNPL,NLN,PWP1,DOLPP1,CHRA1,CRCP,KMT2D,TAFA4B,PQBP1,PSPC1,CEP350,MAD2L2,MRRF,POLDIP2,PSMC3,ZBTB40,ADNP2,GART,ARID2,PATZ1,TRIM44,RNPS1,LHX4,ZNF512B,RBL1,PPP3R1,HIF1AN,SS18L1,MED29,USP14,LIMD1,DNMT1,LYL1,PPP5C,BAP1,SUB1,UTF2H1,TOP2B,LYAR,CCNH,NAB2,EIF4EBP2,CCT6A,KAT7,CLTC,EEF2,AURKAIP1,WDR5,CCT8,FUBP3,DLAT,CUL3,ARPP19,CMPK1,NONO,MEF2C,TCF3,MAF1,MVK,PRPF6,ZC3H4,ZNF26,ZNF24,GSPT1,ACTR8,PSMC5,AGPAT3,MAPK1,STAR,EEF1D,POLR1E,ABT1,PCLAF,PDSS1,CERS2,DHX33,CTR9,NCOA5,FADS1,ZFP91,UIMC1,PUM1,MTOR,IKZF3,KANSL1,SPEN,LCLAT1,GOT2,SMARCA5,EIF3D,ZNF45,RSF1,TFAP4,PRMT6,NIFK,FAF1,ZNF131,PCYT1A,SBNO1,ZNF431,DHFR,MTDH,TCF7L2,ZNF239,NSDHL,MRPL15,PRAME,GMPS,ASCC3,UROD,UBE2L3,THOC1,RPRTOR,MRPS35,TNF,EIF4B,IGF2BP3,MED28,ELL2,PUM2,MT-TL1,SSBP3,ZNF586,BACH1,RBM10,TRAM2,SETX,NFILZ,AP3D1,METTL8,APEX1,BPTF,ICE1,NAA15,ARID1A,PITHD1,B4GALT5,SRSF10,C1QBP,VPS72,ZNF587B,CRK,MED15,EOGT,PRMT5,PCBP2,PTDSS1,RBMX,BAZ1A,GPX4,MLLT3,ALG8,TAF4,RBM14,RBM8A,KDM3B,LRP8,SETD2,ZNF326,INTS13,UCK2,ZNF282,DYRK1A,PHF3,TFDP2,UTF3C6,SLBP,JADE2,NUCKS1,SDCBP,AMD1,AGPAT5,GNL3L,CYB5B,IBA57,MT-TF,WAC,EIF3G,ADI1,DHX29,ARHGEF2,BCA2,POLR2D,ZDHHC5,EIF3M,COPS2,BCL7B,ZFX,ACLY,PAN3,MED13L,PAF1,FASTKD2,PHB2,TCOF1,ZNF75A,SMAR</p> |

|            |                               |                       |                                                                                                                                                                                                                                                                                                                                                                                                                                                                                                                                                                                                                                                                                                                                                                                                                                                                                                                                                                                                                                                                                                                                                                                                                                                                                                                                                                                                                                                                                                                                                                                                                                                                                                                                                                                                                                                                                                                                                                                                                                                                                                                                                                                                                                 |
|------------|-------------------------------|-----------------------|---------------------------------------------------------------------------------------------------------------------------------------------------------------------------------------------------------------------------------------------------------------------------------------------------------------------------------------------------------------------------------------------------------------------------------------------------------------------------------------------------------------------------------------------------------------------------------------------------------------------------------------------------------------------------------------------------------------------------------------------------------------------------------------------------------------------------------------------------------------------------------------------------------------------------------------------------------------------------------------------------------------------------------------------------------------------------------------------------------------------------------------------------------------------------------------------------------------------------------------------------------------------------------------------------------------------------------------------------------------------------------------------------------------------------------------------------------------------------------------------------------------------------------------------------------------------------------------------------------------------------------------------------------------------------------------------------------------------------------------------------------------------------------------------------------------------------------------------------------------------------------------------------------------------------------------------------------------------------------------------------------------------------------------------------------------------------------------------------------------------------------------------------------------------------------------------------------------------------------|
|            |                               |                       | <p> <i>CB1, CREBBP, EXOSC3, EPRS1, INSIG1, LSM14A, NUP98, CNOT1, ASH1L, GEMIN5, PLAGL2, POLR1B, ELOF1, NFYC, SF1, PELP1, XRN2, EZR, TRUB2, DDX20, MMS19, SGPP2, ELOA, TAF9, ELAVL1, UTP15, VCP, RYBP, SAFB2, PSIP1, CSNK1G2, CDK4, DVL2, POLR3C, MRPS2, SCAP, WDR82, AGO2, E2F4, RNF220, DHCR7, ADNP, NFKB1, UBT, BRD2, CHD7, HNRNPA1, GAR1, PPARGC1B, MAGOH, PBRM1, CTCF, HHEX, RRM2, RRM1, PI4KA, ELF1, ZNF614, NSD1, CCT3, CDK7, PKM, FOXK2, HMGB1, BZW1, SMARCD1, YY1, MLLT10, IRAK1, PUS7, PIK3C2B, IP6K1, NAT10, TRMT10C, EP400, AASDHPPT, MTHFD1, ADSS2, CEBPZ, LEPR, MECP2, CSDE1, SKI, TKT, DDX54, AZIN1, TARDBP, LARP4, XRCC6, RPL22, PCNA, MBD1, DDX3X, IDI1, LBR, HDGF, ZNF789, VPS35, ATP5MC3, EIF4G2, JUND, PFAS, HCFC1, CHEK1, AATF, ZMPSTE24, SLTM, VAC14, UBP1, POLE, TRRAP, PPIP5K2, EXOSC9, POLR2A, NUP62, PPIA, TPR, ENC1, TGFBRAP1, ZFP36L2, PPRC1, KEAP1, TFB2M, UBE2N, BAZ1B, NRIP1, VAPA, GFM1, MYBBP1A, DDB1, BACH2, PITX1, GTF3C4, LRRC47, ASXL2, CHST3, TCP1, CENPF, RALY, ENO1, CCT5, FUBP1, POL E3, CDK6, CDC5L, CHD3, ST3GAL2, BEND3, ZNF787, TFAM, AK2, PPP2CA, SSU72, CDK12, ZBTB2, DIDO1, GLYR1, MAN2A2, KMT2A, NOSTRIN, PAICS, ZNF598, SLC30A10, CERS6, GATAD2A, DKC1, DDX1, CTPS1, EWSR1, CAS C3, ARID1B, ZNF33B, HNRNPAB, KAT6A, RBBP4, SAFB, NCBP1, HEATR1, CCT2, HSP90AB1, EIF3B, DUS3L, PA2G4, HNRNPK, SMG1, FDF1, PRPF19, SMARCA4, EIF3J, PRKDC, YES1, ZNF121, PRMT1, HNRNPC, MALT1, WWP2, SUPT16H, HMGA1, FARSA, CELF1, XRCC5, DDX5, UTP4, DEK, LMO2, LSS, EIF4A3, NDST1, DDX56, SLC38A1, KHDRBS1, HNRNPD, LRPPRC, EIF5A, CTDSP1, SUPT6H, RANBP2, DNAJB6, NOLC1, SREBF2, CBFA2T3, ABCF1, AACA, MGA, PIM2, GAPDH, YBX1, EIF5B, PCYT2, RBM3, PGD, AXIN1, RREB1, HSPH1, EP300, TGFB1, RRP1B, FOSB, SRRT, PABPC1, SF3B3, PTMA, THRAP3, MLLT1, ELOVL6, MTND1, NPM1, RIF1, CITED2, ETF1, WDR43, TFRC, RUNX1, NQO1, EIF4G1, TRIM28, ACP5, NR2F2, BCLAF1, SRSF2, HSP90AA1, NFATC3, ZNF521, CAPRIN1, SQLE, TRIM24, RESF1, HNRNPA2B1, LARP1, SQSTM1, CCAR1, MAT2A, DDX21, HMGCS1, SFPQ, SCD, PABPC4, POLR1A, KCNH2, EIF3A, SMARCC1, MYC, SET, BTG1, IGF2BP1, FOS, GCLM, HMGCR, SPTA1, MYB, ODC1, KHSRP, ZEB2, RELN, FUS, ILF3, FASN, GLUL, ACTB, DHX9, HNRNPU, NCL, EGR1, DHCR24, HSPA8</i> </p> |
| GO:0044249 | cellular biosynthetic process | 7.774314040210125e-43 | <p> <i>HRAS, TXK, ACSF3, MITF, JMJD1C, DAP3, TRIP13, ZNF274, GYG1, KMT2B, SUPT7L, MACROH2A1, BRD9, MED16, FADS2, NOL11, BICRA, MTA2, TIRAP, POLR3E, OTUD6B, RIOX1, PHF5A, NACA, POLR1C, MED6, CBX3, PHB, ME TTL3, EZH2, TCF20, PAXIP1, LRRFIP1, GPATCH3, INT S6, FUT8, SMG5, BRD4, STT3A, PTDSS2, DHDDS, MRPL1, ZNF581, SPIN4, ZNF74, SH3YL1, MRPL11, RPUSD4, DENR, CDC123, HROB, MRPS30, CTDPI, MED1, NVL, SRM, HNRNPL, PWP1, DOLPP1, CHRA1, CRCP, KMT2D, TAF4B, PQBP1, PSPC1, CEP350, MAD2L2, MRRF, POLDIP2, PS MC3, ZBTB40, ADNP2, GART, ARID2, PATZ1, TRIM44, RNPS1, LHX4, ZNF512B, RBL1, PPP3R1, HIF1AN, SS18L1, MED29, USP14, LIMD1, DNMT1, LYL1, PPP5C, BAP1, SUB1, GTF2H1, TOP2B, LYAR, CCNH, NAB2, EIF4EBP2, CCT6A, KAT7, EE2, AURKAIP1, WDR5, CCT8, FUBP3, D LAT, CUL3, ARPP19, CMPK1, NONO, MEF2C, TCF3, MAF1, MVK, PRPF6, ZC3H4, ZNF26, ZNF24, GSPT1, ACTR8, P SMC5, AGPAT3, MAPK1, STAR, EE1D, POLR1E, ABT1, P CLAF, PDSS1, CERS2, DHX33, CTR9, NCOA5, FADS1, ZF P91, UIMC1, PUM1, MTOR, IKZF3, KANSL1, SPEN, LCLA T1, GOT2, SMARCA5, EIF3D, ZNF45, RSF1, TFAP4, PRM</i> </p>                                                                                                                                                                                                                                                                                                                                                                                                                                                                                                                                                                                                                                                                                                                                                                                                                                                                                                                                                                                                                                                                                                                                      |



|            |                                     |                       |                                                                                                                                                                                                                                                                                                                                                                                                                                                                                                                                                                                                                                                                                                                                                                                                                                                                                                                                                                                                                                                                                                                                                                                                                                                                                                                                                                                                                                                                                                                                                                                                                                                                                                                                                                                                                                                                                                                                                                                                                                                                                                                                                                                                                                                                                                                                                                                                                                                                                     |
|------------|-------------------------------------|-----------------------|-------------------------------------------------------------------------------------------------------------------------------------------------------------------------------------------------------------------------------------------------------------------------------------------------------------------------------------------------------------------------------------------------------------------------------------------------------------------------------------------------------------------------------------------------------------------------------------------------------------------------------------------------------------------------------------------------------------------------------------------------------------------------------------------------------------------------------------------------------------------------------------------------------------------------------------------------------------------------------------------------------------------------------------------------------------------------------------------------------------------------------------------------------------------------------------------------------------------------------------------------------------------------------------------------------------------------------------------------------------------------------------------------------------------------------------------------------------------------------------------------------------------------------------------------------------------------------------------------------------------------------------------------------------------------------------------------------------------------------------------------------------------------------------------------------------------------------------------------------------------------------------------------------------------------------------------------------------------------------------------------------------------------------------------------------------------------------------------------------------------------------------------------------------------------------------------------------------------------------------------------------------------------------------------------------------------------------------------------------------------------------------------------------------------------------------------------------------------------------------|
|            |                                     |                       | <p>T6,NIFK,FAF1,ZNF131,PCYT1A,SBNO1,ZNF431,DHFR,MTDH,TCF7L2,ZNF239,MRPL15,PRAME,GMPS,ASCC3,UROD,UBE2L3,THOC1,RPTOR,MRPS35,TNF,EIF4B,IGF2BP3,MED28,ELL2,PUM2,MT-<br/>TL1,SSBP3,ZNF586,BACH1,RBM10,SETX,NFILZ,AP3D1,METTL8,APEX1,BPTF,ICE1,NAA15,ARID1A,PI3D1,B4GALT5,SRSF10,C1QBP,VPS72,ZNF587B,CRK,MED15,EOGT,PRMT5,PCBP2,PTDSS1,RBMX,BAZ1A,GPX4,MLLT3,ALG8,TAF4,RBM14,RBM8A,KDM3B,LRP8,SETD2,ZNF326,INTS13,UCK2,ZNF282,DYRK1A,PHF3,TFDP2,GTFC6,SLBP,JADE2,NUCKS1,SDCBP,AMD1,AGPAT5,GNL3L,CYB5B,IBA57,MT-<br/>TF,WAC,EIF3G,ADI1,DHX29,ARHGEF2,BRCA2,POLR2D,ZDHHC5,EIF3M,COPS2,BCL7B,ZFX,ACLY,PAN3,MED13L,PAF1,FASTKD2,PHB2,TCOF1,ZNF75A,SMARCB1,CREBBP,EXOSC3,EPRS1,INSTG1,LSM14A,NUP98,CNOT1,ASH1L,GEMIN5,PLAGL2,POLR1B,ELOF1,NFYC,SF1,PELP1,XRN2,EZR,TRUB2,DDX20,MMS19,SGPP2,ELOA,TAF9,ELAVL1,UTP15,VCP,RYBP,SAFB2,PSIP1,CSNK1G2,CDK4,DVL2,POLR3C,MRPS2,SCAP,WDR82,AGO2,E2F4,RNF220,ADNP,NFKB1,UBTF,BRD2,CHD7,HNRNPA1,GAR1,PPARGC1B,MAGOH,PBRM1,CTCF,HHEX,RRM2,RRM1,PI4KA,ELF1,ZNF614,NSD1,CCT3,CDK7,PKM,FOXK2,HMGB1,BZW1,SMARCD1,YY1,MLLT10,IRAK1,PUS7,PIK3C2B,IP6K1,NAT10,TRMT10C,EP400,AASDHPPT,MTHFD1,ADSS2,CEBPZ,LEPR,MECP2,CSDE1,SKI,TKT,DDX54,AZIN1,TARDBP,LARP4,XRCC6,RPL22,PCNA,MBD1,DDX3X,IDI1,HDGF,ZNF789,VPS35,ATP5MC3,EIF4G2,JUND,PFAS,HCFC1,CHEK1,AATF,ZMPSTE24,SLTM,VAC14,UBP1,POLE,TRRAP,EXOSC9,POLR2A,NUP62,PPIA,TPR,ENC1,TGFBRAP1,ZFP36L2,PPRC1,KEAP1,TFB2M,UBE2N,BAZ1B,NRIP1,VAPA,GFM1,MYBBP1A,DDDB1,BACH2,PIRX1,GTFC3C4,LRRC47,ASXL2,CHST3,TCP1,CENPF,RALY,ENO1,CCT5,FUBP1,POLE3,CDK6,CDC5L,CHD3,ST3GAL2,BEND3,ZNF787,TFAM,AK2,PPP2CA,SSU72,CDK12,ZBTB2,DIDO1,GLYR1,MAN2A2,KMT2A,NOSTRIN,PAICS,ZNF598,CERS6,GATAD2A,DKC1,DDX1,CTPS1,EWSR1,CASC3,ARID1B,ZNF33B,HNRNPAB,KAT6A,RBBP4,SAFB,NCBP1,HEATR1,CCT2,HSP90AB1,EIF3B,DUS3L,PA2G4,HNRNPK,SMG1,SMARCA4,EIF3J,PRKDC,YES1,ZNF121,PRMT1,HNRNPC,MALT1,WWP2,SUPT16H,HMGA1,FARSA,CELF1,XRCC5,DDX5,UTP4,DEK,LMO2,LSS,EIF4A3,NDST1,DDX56,SLC38A1,KHDRBS1,HNRNPD,LRRPRC,EIF5A,CTDSP1,SUPT6H,DNAJB6,NOLC1,SREBF2,CBFA2T3,ABCF1,ACACA,MGA,PIM2,GAPDH,YBX1,EIF5B,PCYT2,RBM3,AXIN1,RRB1,EP300,TGFBR1,RRP1B,FOSB,SRRT,PABPC1,SF3B3,PTMA,THRAP3,MLLT1,ELOVL6,MT-<br/>ND1,NPM1,RIF1,CITED2,ETF1,WDR43,TFRC,RUNX1,NQO1,EIF4G1,TRIM28,ACP5,NR2F2,BCLAF1,SRSF2,HSP90AA1,NFATC3,ZNF521,CAPRIN1,TRIM24,RESF1,HNRNPA2B1,LARP1,SQSTM1,CCAR1,MAT2A,DDX21,HMGCS1,SFPQ,SCD,PABPC4,POLR1A,KCNH2,EIF3A,SMARCC1,MYC,SET,BTG1,IGF2BP1,FOS,GCLM,HMGCR,SPTA1,MYB,ODC1,KHSRP,ZEB2,RELN,FUS,ILF3,FASN,GLUL,ACTB,DHX9,HNRNPU,NCL,EGR1,HSPA8</p> |
| GO:0051252 | regulation of RNA metabolic process | 1.048050740301161e-41 | <p>HRAS,TXK,MITF,JMJD1C,ZNF274,KMT2B,SUPT7L,MACROH2A1,BRD9,MED16,NOL11,BICRA,MTA2,TIRAP,CWC22,RIOX1,PHF5A,NACA,MED6,CBX3,PHB,METTL3,EZH2,TCF20,PAXIP1,LRRFIP1,GPATCH3,INTS6,BRD4,ZNF581,SPIN4,ZNF74,CTDP1,MED1,HNRNPL,PWP1,KMT2D,TAF4B,PQBP1,PSPC1,CEP350,MAD2L2,PSMC3,ZBTB40,ADNP2,ARID2,PATZ1,TRIM44,RNPS1,LHX4,ZNF512B,RBL1,PPP3R1,HIF1AN,SS18L1</p>                                                                                                                                                                                                                                                                                                                                                                                                                                                                                                                                                                                                                                                                                                                                                                                                                                                                                                                                                                                                                                                                                                                                                                                                                                                                                                                                                                                                                                                                                                                                                                                                                                                                                                                                                                                                                                                                                                                                                                                                                                                                                                                             |

|            |                                     |                        |                                                                                                                                                                                                                                                                                                                                                                                                                                                                                                                                                                                                                                                                                                                                                                                                                                                                                                                                                                                                                                                                                                                                                                                                                                                                                                                                                                                                                                                                                                                                                                                                                                                                                                                                                                                                                                                                                                                                                                                                                                                                                                                                                                                            |
|------------|-------------------------------------|------------------------|--------------------------------------------------------------------------------------------------------------------------------------------------------------------------------------------------------------------------------------------------------------------------------------------------------------------------------------------------------------------------------------------------------------------------------------------------------------------------------------------------------------------------------------------------------------------------------------------------------------------------------------------------------------------------------------------------------------------------------------------------------------------------------------------------------------------------------------------------------------------------------------------------------------------------------------------------------------------------------------------------------------------------------------------------------------------------------------------------------------------------------------------------------------------------------------------------------------------------------------------------------------------------------------------------------------------------------------------------------------------------------------------------------------------------------------------------------------------------------------------------------------------------------------------------------------------------------------------------------------------------------------------------------------------------------------------------------------------------------------------------------------------------------------------------------------------------------------------------------------------------------------------------------------------------------------------------------------------------------------------------------------------------------------------------------------------------------------------------------------------------------------------------------------------------------------------|
|            |                                     |                        | <p>,MED29,HNRNPH1,USP14,LIMD1,DNMT1,LYL1,BAP1,SUB1,GTTF2H1,TOP2B,LYAR,CCNH,NAB2,KAT7,WDR5,FUBP3,CUL3,NONO,MEF2C,TCF3,MAF1,NBAS,PRPF6,ZC3H4,ZNF26,ZNF24,GRSF1,ACTR8,PSMC5,ZC3HAV1,PKP3,ABT1,DHX33,CTR9,NCOA5,FADS1,ZFP91,UIMC1,PUM1,MTOR,IKZF3,KANSL1,SPEN,SMARCA5,ZNF45,RSF1,TFAP4,PRMT6,FAF1,HNRNPA0,ZNF131,SBNO1,ZNF431,MTDH,TCF7L2,ZNF239,PRAME,UBE2L3,THOC1,RPTOR,TNF,RAVER1,IGF2BP3,MED28,ELL2,PUM2,SSBP3,SNRPA,ZNF586,BACH1,RBM10,SETX,NFILZ,AP3D1,APEX1,BPTF,ICE1,RIOK2,NAA15,ARID1A,PITHD1,ZC3H14,SRSF10,C1QBP,VPS72,ZNF587B,CRK,MED15,PRMT5,PCBP2,RBMX,BAZ1A,MLLT3,TAF4,RBM14,RBM8A,KDM3B,LRP8,SETD2,ZNF326,INTS13,ZNF282,DYRK1A,TFDP2,JADE2,NUCKS1,SDCBP,NSRP1,WAC,ARHGEF2,BRCA2,POLR2D,WTAP,COPS2,BCL7B,RBM42,ZFX,PAN3,MED13L,PAF1,ZC3H18,FASTKD2,PHB2,ZNF75A,SMARCB1,CREBBP,EXOSC3,NUP98,CNOT1,ASH1L,PLAGL2,NFYC,SF1,PELP1,EZR,DDX20,MMS19,ELOA,TAF9,ELAVL1,UTP15,RYBP,SAFB2,DHX34,PSIP1,RBM12,CDK4,DVL2,POLR3C,RBM25,WDR82,AGO2,E2F4,RNF220,ADNP,NFKB1,UBTF,BRD2,CHD7,RBM15B,HNRNPA1,PPARGC1B,MAGOH,PBRM1,CTCF,HHEX,ELF1,ZNF614,NSD1,CDK7,FOXK2,HMGB1,SMARCD1,YY1,MLLT10,IRAK1,SRSF6,EP400,CEBPZ,MECP2,CSDE1,MBNL1,SKI,DDX54,TARDBP,XRCC6,PCNA,MBD1,DDX3X,HDGF,ZNF789,EIF4G2,JUND,HCFC1,CHEK1,AATF,ZMPSTE24,SLTM,UBP1,TRRAP,EXOSC9,NUP62,PPIA,TPR,SRSF7,TGFBRAP1,ZFP36L2,SF3B4,PPRC1,SLC38A2,KEAP1,TFB2M,UBE2N,BAZ1B,NRIP1,MYBBP1A,BACH2,PITX1,ASXL2,CENPF,RALY,ENO1,FUBP1,CDK6,CDC5L,CHD3,BEND3,ZNF787,TFAM,PPP2CA,SSU72,CDK12,ZBTB2,GLYR1,KMT2A,NOSTRIN,GATAD2A,DKC1,EWSR1,DDX49,CASC3,ARID1B,CPSF7,ZNF33B,HNRNPAB,KAT6A,USP36,RBBP4,SAFB,NCBP1,HEATR1,PA2G4,HNRNPK,PRPF19,SMARCA4,PRKDC,YES1,ZNF121,TRA2B,HNRNPC,MALT1,WWP2,SUPT16H,HMGA1,CELF1,RBMXL1,XRCC5,DDX5,UTP4,DEK,LMO2,EIF4A3,KHDRBS1,HNRNPD,LRPPRC,EIF5A,CTDSP1,SUPT6H,DNAJB6,NOLC1,SREBF2,CBFA2T3,MGA,NSUN2,PIM2,YBX1,LIN28B,RBM3,AXIN1,RREB1,EP300,TGFBP1,DAZAP1,RRP1B,FOSB,SRRT,PABPC1,SERBP1,AHNAK,SF3B3,PTMA,THRAP3,MLLT1,HNRNPF,NPM1,RIF1,CITED2,SON,WDR43,TFRC,RUNX1,TRIM28,U2AF2,NR2F2,BCLAF1,SRSF2,NFATC3,ZNF521,TRIM24,RESF1,HNRNPA2B1,LARP1,SQSTM1,PTBP1,CCAR1,DDX21,SFPQ,PABPC4,HNRNPM,KCNH2,SRSF3,SMARCC1,MYC,SET,BTG1,IGF2BP1,FOS,MYB,KHSRP,ZEB2,RELN,FUS,ILF3,ACTB,DHX9,HNRNPU,NCL,EGR1,HSPA8</p> |
| GO:0009059 | macromolecular biosynthetic process | 1.8891374905976274e-41 | <p>HRAS,TXK,MITF,JMJD1C,DAP3,TRIP13,ZNF274,GYG1,KMT2B,SUPT7L,MACROH2A1,BRD9,MED16,NOL11,BICRA,MTA2,TIRAP,POLR3E,OTUD6B,RIOX1,PHF5A,NACA,POLR1C,MED6,CBX3,PHB,METTL3,EZH2,TCF20,PAXIP1,LRRFIP1,GPATCH3,INTS6,FUT8,SMG5,BRD4,STT3A,DHDDS,MRPL1,ZNF581,SPIN4,ZNF74,MRPL11,RPUSD4,DENR,CDC123,HROB,MRPS30,CTDP1,MED1,NVL,HNRNPL,PWP1,DOLPP1,CHRA1,CRCP,KMT2D,TAF4B,PQBP1,PSPC1,CEP350,MAD2L2,MRRF,POLDIP2,PSMC3,ZBTB40,ADNP2,ARID2,PATZ1,TRIM44,RNPS1,LHX4,ZNF512B,RBL1,PPP3R1,HIF1AN,SS18L1,MED29,USP14,LIMD1,DNMT1,LYL1,PPP5C,BAP1,SUB1,GTTF2H1,TOP2B,LYAR,CCNH,NAB2,EIF4EBP2,CCT6A,KAT7,CLTC,EEF2,AURKAIP1,WDR5,CCT8,FUBP3,CUL3,NONO,MEF2C,TCF3,MAF1,PRPF6,ZC3H4,ZNF26,ZNF24,GSPT1,ACTR8,PSMC5,MAPK1</p>                                                                                                                                                                                                                                                                                                                                                                                                                                                                                                                                                                                                                                                                                                                                                                                                                                                                                                                                                                                                                                                                                                                                                                                                                                                                                                                                                                                                                                                                                    |

|            |                                              |                       |                                                                                                                                                                                                                                                                                                                                                                                                                                                                                                                                                                                                                                                                                                                                                                                                                                                                                                                                                                                                                                                                                                                                                                                                                                                                                                                                                                                                                                                                                                                                                                                                                                                                                                                                                                                                                                                                                                                                                                                                                                                                                                                                                                                                                                                                                |
|------------|----------------------------------------------|-----------------------|--------------------------------------------------------------------------------------------------------------------------------------------------------------------------------------------------------------------------------------------------------------------------------------------------------------------------------------------------------------------------------------------------------------------------------------------------------------------------------------------------------------------------------------------------------------------------------------------------------------------------------------------------------------------------------------------------------------------------------------------------------------------------------------------------------------------------------------------------------------------------------------------------------------------------------------------------------------------------------------------------------------------------------------------------------------------------------------------------------------------------------------------------------------------------------------------------------------------------------------------------------------------------------------------------------------------------------------------------------------------------------------------------------------------------------------------------------------------------------------------------------------------------------------------------------------------------------------------------------------------------------------------------------------------------------------------------------------------------------------------------------------------------------------------------------------------------------------------------------------------------------------------------------------------------------------------------------------------------------------------------------------------------------------------------------------------------------------------------------------------------------------------------------------------------------------------------------------------------------------------------------------------------------|
|            |                                              |                       | <p>,EEF1D,POLR1E,ABT1,PCLAF,CERS2,DHX33,CTR9,NCOA5,FADS1,ZFP91,UIMC1,PUM1,MTOR,IKZF3,KANSL1,SPEN,SMARCA5,EIF3D,ZNF45,RSF1,TFAP4,PRMT6,NIFK,FAF1,ZNF131,SBNO1,ZNF431,DHFR,MTDH,TCF7L2,ZNF239,MRPL15,PRAME,ASCC3,UBE2L3,THOC1,RPTOR,MRPS35,TNF,EIF4B,IGF2BP3,MED28,ELL2,PUM2,MT-TL1,SSBP3,ZNF586,BACH1,RBM10,SETX,NFILZ,AP3D1,METT18,APEX1,BPTF,ICE1,NAA15,ARID1A,PI3D1,B4GALT5,SRSF10,C1QBP,VPS72,ZNF587B,CRK,MED15,EOGT,PRMT5,PCBP2,RBMX,BAZ1A,MLLT3,ALG8,TAF4,RBM14,RBM8A,KDM3B,LRP8,SETD2,ZNF326,INTS13,ZNF282,DYRK1A,PHF3,TFDP2,GTF3C6,SLBP,JADE2,NUCKS1,SDCBP,GNL3L,MT-TF,WAC,EIF3G,DHX29,ARHGEF2,BRCA2,POLR2D,ZDHHC5,EIF3M,COPS2,BCL7B,ZFX,PAN3,MED13L,PAF1,FASTKD2,PHB2,TCOF1,ZNF75A,SMARCB1,CREBBP,EXOSC3,EPRS1,LSM14A,NUP98,CNOT1,ASH1L,GEMIN5,PLAGL2,POLR1B,ELOF1,NFYC,SF1,PELP1,XRN2,EZR,TRUB2,DDX20,MMS19,ELOA,TAF9,ELAVL1,UTP15,VCP,RYBP,SAFB2,PSIP1,CDK4,DVL2,POLR3C,MRPS2,WDR82,AGO2,E2F4,RNF220,ADNP,NFKB1,UBTF,BRD2,CHD7,HNRNPA1,GAR1,PPARGC1B,MAGOH,PBRM1,CTCF,HHEX,RRM1,ELF1,ZNF614,NSD1,CCT3,CDK7,PKM,FOXK2,HMGB1,BZW1,SMARCD1,YY1,MLLT10,IRAK1,PUS7,NAT10,TRMT10C,EP400,CEBPZ,MED12,CSDE1,SKI,DDX54,TARDBP,LARP4,XRCC6,RP112,PCNA,MBD1,DDX3X,HDGF,ZNF789,EIF4G2,JUNB,HCF1,CHEK1,AATF,ZMPSTE24,SLTM,UBP1,POLE,TRRAP,EXOSC9,POLR2A,NUP62,PPIA,TPR,ENC1,TGFBP1,ZFP36L2,PPRC1,KEAP1,TFB2M,UBE2N,BAZ1B,NRIP1,GFM1,MYBBP1A,BACH2,PITX1,GTF3C4,LRRRC47,ASXL2,CHST3,TCP1,CENPF,RALY,ENO1,CCIT5,FUBP1,POLE3,CDK6,CDC5L,CHD3,ST3GAL2,BEND3,ZNF787,TFAM,PPP2CA,SSU72,CDK12,ZBTB2,DI101,GLYR1,MAN2A2,KMT2A,NOSTRIN,ZNF598,GATA2A,DKC1,DDX1,EWSR1,CASC3,ARID1B,ZNF33B,HNRNPAB,KAT6A,RBBP4,SAFB,NCBP1,HEATR1,CCT2,HSP90AB1,EIF3B,DUS3L,PA2G4,HNRNPK,SMARCA4,EIF3J,PRKDC,YES1,ZNF121,PRMT1,HNRNPC,MALT1,WWP2,SUPT16H,HMGA1,FARSA,CELF1,XRCC5,DDX5,UTP4,DEK,LMO2,EIF4A3,NDST1,DDX56,KHDRBS1,HNRNPD,LRRPRC,EIF5A,CTDSP1,SUPT6H,DNAJB6,NOLC1,SREBF2,CBFA2T3,ABCF1,MGA,PIM2,GAPDH,YBX1,EIF5B,RBM3,AXIN1,RREB1,HSPH1,EP300,TGFBP1,RRP1B,FOSB,SRRT,PABPC1,SF3B3,PTMA,THRAP3,MLLT1,NPM1,RIF1,CITED2,ETF1,WDR43,TFRC,RUNX1,EIF4G1,TRIM28,NR2F2,BCLAF1,SRSF2,HSP90AA1,NFATC3,ZNF521,CAPRIN1,TRIM24,RESF1,HNRNPAB2B1,LARP1,SQSTM1,CCAR1,DDX21,SFPQ,PABPC4,POLR1A,KCNH2,EIF3A,SMARCC1,MYC,SET,BTG1,IGF2BP1,FOS,MYB,KHSRP,ZEB2,RELN,FUS,ILF3,GLUL,ACTB,DHX9,HNRNPU,NCL,EGR1,HSPA8</p> |
| GO:0034641 | cellular nitrogen compound metabolic process | 3.112118402543911e-41 | <p>HRAS,NOP14,TKX,ACSF3,SNRBP,MITF,JMJD1C,DAP3,PPAN,MSH3,TRIP13,ZNF274,PRPF38B,KMT2B,RNASEH1,SUPT7L,SREK1,MACROH2A1,BRD9,MED16,MUS81,NOL11,BICRA,MTA2,SNHG6,TIRAP,RAD51C,UTP3,CWC22,POLR3E,MTREX,OTUD6B,RIOX1,PHF5A,NACA,POLR1C,MED6,PRXL2C,CBX3,PHB,METT13,EZH2,TCF20,DCLRE1C,NOC4L,RWD3,MFAP1,DNM1L,PAXIP1,LRRFIP1,GPATCH3,INTS6,FUT8,SMG5,BRD4,PTDSS2,RRP9,MRPL1,ZNF581,SPIN4,ZNF74,MRPL11,RPUSD4,DENR,CDC123,RNASEH2C,HROB,MRPS30,CTDP1,NUP155,MED1,NVL,SRM,HNRNPL,PWP1,WDR46,MCM10,EFTUD2,CHAC1,CRCP,KMT2D,TAF4B,PQB1,PSPC1,CEP350,MAD2L2,MRRF,POLDIP2,PSMC3,</p>                                                                                                                                                                                                                                                                                                                                                                                                                                                                                                                                                                                                                                                                                                                                                                                                                                                                                                                                                                                                                                                                                                                                                                                                                                                                                                                                                                                                                                                                                                                                                                                                                                                                                                         |

|  |  |  |                                                                                                                                                                                                                                                                                                                                                                                                                                                                                                                                                                                                                                                                                                                                                                                                                                                                                                                                                                                                                                                                                                                                                                                                                                                                                                                                                                                                                                                                                                                                                                                                                                                                                                                                                                                                                                                                                                                                                                                                                                                                                                                                                                                                                                                                                                                                                                                                                                                                                                                                                                                                                                                                                                                                                                                                                                                                                                                                                                                                                                                                                                                                                                                                                                                                                                                                     |
|--|--|--|-------------------------------------------------------------------------------------------------------------------------------------------------------------------------------------------------------------------------------------------------------------------------------------------------------------------------------------------------------------------------------------------------------------------------------------------------------------------------------------------------------------------------------------------------------------------------------------------------------------------------------------------------------------------------------------------------------------------------------------------------------------------------------------------------------------------------------------------------------------------------------------------------------------------------------------------------------------------------------------------------------------------------------------------------------------------------------------------------------------------------------------------------------------------------------------------------------------------------------------------------------------------------------------------------------------------------------------------------------------------------------------------------------------------------------------------------------------------------------------------------------------------------------------------------------------------------------------------------------------------------------------------------------------------------------------------------------------------------------------------------------------------------------------------------------------------------------------------------------------------------------------------------------------------------------------------------------------------------------------------------------------------------------------------------------------------------------------------------------------------------------------------------------------------------------------------------------------------------------------------------------------------------------------------------------------------------------------------------------------------------------------------------------------------------------------------------------------------------------------------------------------------------------------------------------------------------------------------------------------------------------------------------------------------------------------------------------------------------------------------------------------------------------------------------------------------------------------------------------------------------------------------------------------------------------------------------------------------------------------------------------------------------------------------------------------------------------------------------------------------------------------------------------------------------------------------------------------------------------------------------------------------------------------------------------------------------------------|
|  |  |  | <p>ZBTB40, DHX38, ADNP2, GART, NT5C3A, ARID2, DDX23, PATZ1, TRIM44, TRNT1, RNPS1, LHX4, ZNF512B, RBL1, PPP3R1, HIF1AN, RPUSD1, SS18L1, MED29, HNRNPH1, USP14, LIMD1, DNMT1, LYL1, BICD1, PPP5C, BAP1, DUS1L, SUB1, GTF2H1, DHX16, TOP2B, LYAR, LRWD1, CNH, NAB2, EIF4EBP2, CCT6A, KAT7, TSR3, EEF2, AURKAIP1, SNHG20, WDR5, CCT8, FUBP3, IMP4, SNHG17, BCCIP, DLAT, NOB1, CUL3, CMPK1, NONO, MEF2C, TCF3, TEX15, MAF1, CLSPN, NOL9, MVK, NBAS, ZFYVE26, PRPF6, ZC3H4, ZNF26, ZNF24, GSPT1, GRSF1, UBQLN4, ACTR8, PSMC5, ZC3HAV1, HNRNPA3, MAPK1, EEF1D, POLR1E, PKP3, ABT1, PCLAF, WDR36, CERS2, DHX33, CTR9, NCOA5, FADS1, ZFP91, DHX15, UIMC1, PUM1, MTOR, RPRD2, UTP18, IKZF3, KANSL1, CPSF3, SPEN, SMG9, SMARCA5, CWC25, SF3A2, H2AW, EIF3D, ZNF45, RSF1, TFAP4, PRMT6, NIFK, FAF1, HNRNPA0, ZNF131, SBN01, ZNF431, DHFR, MTDH, TCF7L2, ZNF239, SRRM2, MRPL15, PRAME, GMPS, ASCC3, UROD, UBE2L3, THOC1, MCMBP, SETMAR, RPTOR, PPP1R10, MRPS35, CSTF2, TNF, RAVER1, EIF4B, WDR33, TRMT61A, IGF2BP3, PDCD7, MED28, ELL2, PUM2, WDR3, MT-<br/>TL1, SSBP3, SNRPA, ZNF586, BACH1, DDX10, RBM10, SETX, NFILZ, TRMT2A, AP3D1, METTL8, APEX1, BPTF, EDC4, ICE1, RIOK2, NAA15, ARID1A, PITHD1, ZC3H14, B4GALT5, HERC2, SRSF10, SBDS, C1QBP, VPS72, ZNF587B, CRK, TICRR, MED15, SRSF8, WDR74, PRPF4, PRMT5, PCBP2, TRMT6, RBMX, BAZ1A, DPYS, YJU2, WDR70, MCCC2, MLLT3, RAD23B, TAF4, RBM14, RBM8A, KDM3B, BOP1, LRP8, SETD2, ZNF326, INTS13, RPIA, UCK2, FEN1, CHAF1A, TRMO, ZNF282, DYRK1A, PHF3, TFDP2, WDR12, GTF3C6, SLBP, CUL4A, JADE2, NUCKS1, SDCBP, UTP25, AMD1, PRPF38A, SSB, GNL3L, DNMT1P2, CYB5B, IBA57, RNU6-322P, NSRP1, MT-<br/>TF, TFIP11, WAC, EIF3G, DHX29, ARHGEF2, BRCA2, POLR2D, EIF3M, WTAP, COPS2, BCL7B, RBM42, ZFX, ZC3H7B, ACLY, SNRPD1, PAN3, MED13L, PAF1, ZC3H18, FAS TKD2, PHB2, TCOF1, XRCC2, PDS5A, BRCC3, ZNF75A, SMARCB1, TRIR, CREBBP, EXOSC3, WBP11, EPRS1, LSM14A, NUP98, HNRNPUL1, CNOT1, ASH1L, GEMIN5, PLAGL2, POLR1B, ELOF1, WDR6, NFYC, SF1, PELP1, XRN2, EZR, TRUB2, DDX20, URM1, DDX51, MMS19, ELOA, TAF9, ELAVL1, UTP15, VCP, RYBP, SAFB2, DHX34, PSIP1, DCAF13, RBM12, CDK4, DVL2, POLR3C, THG1L, MRPS2, RBM25, RRP12, WDR82, SMC1A, AGO2, E2F4, G3BP1, RNF220, RRP36, MCM6, AQR, DDX18, IER3, ADNP, NFKB1, UBT1, BRD2, CHD7, RBM15B, USP37, HNRNPA1, GAR1, RRS1, PPARGC1B, MAGOH, PBRM1, CTCF, HHEX, ANKRD17, HNRNPR, RRM2, RRM1, ELF1, ZNF614, NSD1, RSL1D1, CCT3, CDK7, RNF138, PKM, FOXK2, HMGB1, BZW1, SMARCD1, YY1, NOL8, MLLT10, IRAK1, PUS7, NAT10, TRMT10C, SNU13, SRSF6, EP400, AASDHPPT, MTHFD1, ADSS2, SART1, CEBPZ, MECP2, CSDE1, MBNL1, SKI, TKT, RRP15, DDX54, AZIN1, N4BP2, TARDDB, LARP4, XRCC6, PNN, RPL22, PCNA, MBD1, UPF2, DDX3X, HDGF, ZNF789, VPS35, ATP5MC3, EIF4G2, MCM2, JUND, PFAS, HCFC1, CHEK1, AATF, ZMPSTE24, PRMT7, SLTM, CYP3A5, URB1, UBP1, POLE, TRRAP, EXOSC9, POLR2A, NUP62, TSR1, RBM19, PPIA, PRPF3, IK, TPR, ENC1, SRSF7, UTP20, TGFBRAPI, ZFP36L2, SF3B4, PPRC1, SLC38A2, EBNA1BP2, KEAP1, TFB2M, UBE2N, BAZ1B, NRIP1, MRT04, VAPA, GFMI1, MYBBP1A, DDB1, BACH2, PITX1, GTF3C4, LRRC47, NASP, ASXL2, TCP1, CENPF, RALY, ENO1, CCT5, FUBP1, POLE3, CDK6, CDC5L, CHD3, ST3GAL2, RAN, BEND3, C19ORF48, ZNF787, TFAM, AK2, PPP2CA, SSU72, MSH2, CDK12, ZBTB2, DIDO1, GLYR1, KMT2A, MCM3, NOSTRIN, GRWD1, PAICS, ZNF598, CERS6, SNHG3, GATAD2A, DK</p> |
|--|--|--|-------------------------------------------------------------------------------------------------------------------------------------------------------------------------------------------------------------------------------------------------------------------------------------------------------------------------------------------------------------------------------------------------------------------------------------------------------------------------------------------------------------------------------------------------------------------------------------------------------------------------------------------------------------------------------------------------------------------------------------------------------------------------------------------------------------------------------------------------------------------------------------------------------------------------------------------------------------------------------------------------------------------------------------------------------------------------------------------------------------------------------------------------------------------------------------------------------------------------------------------------------------------------------------------------------------------------------------------------------------------------------------------------------------------------------------------------------------------------------------------------------------------------------------------------------------------------------------------------------------------------------------------------------------------------------------------------------------------------------------------------------------------------------------------------------------------------------------------------------------------------------------------------------------------------------------------------------------------------------------------------------------------------------------------------------------------------------------------------------------------------------------------------------------------------------------------------------------------------------------------------------------------------------------------------------------------------------------------------------------------------------------------------------------------------------------------------------------------------------------------------------------------------------------------------------------------------------------------------------------------------------------------------------------------------------------------------------------------------------------------------------------------------------------------------------------------------------------------------------------------------------------------------------------------------------------------------------------------------------------------------------------------------------------------------------------------------------------------------------------------------------------------------------------------------------------------------------------------------------------------------------------------------------------------------------------------------------------|

|            |                            |                        |                                                                                                                                                                                                                                                                                                                                                                                                                                                                                                                                                                                                                                                                                                                                                                                                                                                                                                                                                                                                                                                                                         |
|------------|----------------------------|------------------------|-----------------------------------------------------------------------------------------------------------------------------------------------------------------------------------------------------------------------------------------------------------------------------------------------------------------------------------------------------------------------------------------------------------------------------------------------------------------------------------------------------------------------------------------------------------------------------------------------------------------------------------------------------------------------------------------------------------------------------------------------------------------------------------------------------------------------------------------------------------------------------------------------------------------------------------------------------------------------------------------------------------------------------------------------------------------------------------------|
|            |                            |                        | <p>C1,DDX1,THUMPD1,CTPS1,EWSR1,DDX49,CASC3,SSRP1,ARID1B,CPSF7,RRP1,ZNF33B,HNRNPAB,KAT6A,USP36,RBBP4,SAFB,NCBP1,HEATR1,CCT2,HSP90A,B1,EIF3B,DUS3L,PA2G4,HNRNPK,SMG1,DHX37,PRPF19,SMARCA4,EIF3J,PRKDC,YES1,ZNF121,TRA2B,PRMT1,HNRNPC,MALT1,WWP2,SF3A3,SUPT16H,HMGA1,FARSA,CELF1,RBMXL1,XRCC5,DDX5,UTP4,DEK,LMO2,DDX46,EIF4A3,TRIP12,DDX39A,DDX56,CIZ1,CDT1,NOP56,HNRNPDL,KHDRBS1,HNRNPD,LRPPRC,EIF5A,CTDSP1,SUPT6H,DNAJB6,NOLC1,SNRNP200,SREBF2,CBFA2T3,ABCF1,DANCR,ACACA,MGA,NSUN2,AP5Z1,HSPD1,PIM2,GAPDH,YBX1,LIN28B,EIF5B,PCYT2,RBM3,PGD,SF3A1,AXIN1,MPHOSPH10,PES1,REB1,EP300,TGFBR1,DAZAP1,ALYREF,RRP1B,FOSB,SRRT,PABPC1,SERBP1,AHNAK,PRPF8,SF3B3,PTMA,THRAP3,MLLT1,ELOVL6,HNRNPF,MT-ND1,NPM1,RIF1,CITED2,ETF1,SON,WDR43,TFRC,RUNX1,NQO1,EIF4G1,TRIM28,ACP5,U2AF2,NR2F2,BCLAF1,SRSF2,HSP90AA1,MDN1,NFATC3,ZNF521,CAPRIN1,TRMT1,MCM4,TRIM24,NOP58,RESF1,HNRNPA2B1,LARP1,SQSTM1,PTBP1,CCAR1,DDX21,HMGCS1,SFPQ,PABPC4,HNRNPM,POLR1A,KCNH2,SRSF3,EIF3A,MCM7,SMARCC1,MYC,SET,BTG1,IGF2BP1,FOS,GC1M,HMGCR,SPTA1,MYB,ODC1,KHSRP,ZEB2,RELN,FUS,ILF3,ACTB,DHX9,HNRNPU,MCM5,NCL,EGR1,HSPA8</p> |
| GO:0016072 | rRNA metabolic process     | 4.659727176400823e-41  | <p>NOP14,PPAN,MACROH2A1,NOL11,UTP3,MTREX,NOC4L,RRP9,MRPL1,RPUSD4,NVL,PWP1,WDR46,RPUSD1,LYAR,TSR3,IMP4,NOB1,NOL9,POLR1E,ABT1,WDR36,MTOR,UTP18,NIFK,WDR3,DDX10,RIOK2,SBDS,WDR74,BOP1,WDR12,GTF3C6,UTP25,TCOF1,SMARCB1,TRIR,EXOSC3,WBP11,POLR1B,PELP1,XRN2,DDX51,UTP15,DCAF13,RRP12,RRP36,DDX18,CHD7,GAR1,RRS1,RSL1D1,NOL8,NAT10,SNU13,SART1,RRP15,DDX54,URB1,EXOSC9,TSR1,UTP20,EBNA1BP2,TFB2M,MTO4,GTF3C4,DKC1,DDX49,RRP1,USP36,HEATR1,PA2G4,DHX37,SMARCA4,PRKDC,UTP4,EIF4A3,DDX56,NOP56,NOLC1,MPHOSPH10,PES1,RRP1B,WDR43,MDN1,NOP58,DDX21,NCL</p>                                                                                                                                                                                                                                                                                                                                                                                                                                                                                                                                        |
| GO:0034470 | ncRNA processing           | 3.0324239187311426e-40 | <p>NOP14,PPAN,NOL11,UTP3,MTREX,METTL3,NOC4L,INTS6,RRP9,MRPL1,RPUSD4,NUP155,NVL,PWP1,WDR46,TRNT1,RPUSD1,DUS1L,LYAR,TSR3,IMP4,NOB1,NOL9,GRSF1,ABT1,WDR36,PUM1,UTP18,NIFK,TNF,TRMT61A,PUM2,WDR3,DDX10,TRMT2A,METTL8,RIOK2,SBDS,WDR74,TRMT6,BOP1,INTS13,TRMO,WDR12,UTP25,SSB,ZC3H7B,EXOSC3,WBP11,WDR6,PELP1,XRN2,TRUB2,URM1,DDX51,UTP15,DCAF13,THG1L,RRP12,AGO2,RRP36,DDX18,CHD7,GAR1,RRS1,RSL1D1,NOL8,PUS7,NAT10,TRMT10C,SNU13,SART1,RRP15,DDX54,DDX3X,ZMPSTE24,URB1,EXOSC9,TSR1,UTP20,EBNA1BP2,TFB2M,MTO4,DKC1,DDX1,THUMPD1,DDX49,RRP1,USP36,NCBP1,HEATR1,DUS3L,PA2G4,DHX37,PRKDC,DDX5,UTP4,EIF4A3,DDX56,NOP56,NOLC1,NSUN2,LIN28B,MPHOSPH10,PES1,RRP1B,SRR1,WDR43,MDN1,TRMT1,NOP58,HNRNPA2B1,DDX21,SRSF3</p>                                                                                                                                                                                                                                                                                                                                                                              |
| GO:0044237 | cellular metabolic process | 6.044757627314364e-39  | <p>HRAS,NOP14,TXK,ACSF3,SNRPB,MITF,PPP6C,JMJD1C,DAP3,PPAN,MSH3,TRIP13,CHTOP,ZNF274,GYG1,PRPF38B,KMT2B,MMAB,RNASEH1,SUPT7L,SREK1,MACROH2A1,BRD9,MED16,FADS2,MUS81,NOL11,BICRA,MTA2,SNHG6,TIRAP,RAD51C,NRROS,UTP3,CWC22,BEGAIN,POLR3E,NEU1,MTREX,OTUD6B,RIOX1,PHF5A,NACA,POLR1C,MED6,PRXL2C,CBX3,PHB,METTL3,EZH2,TCF20,FES,DCLRE1C,NOC4L,RFW3,MFAP1,ULK3,DNM1L,PAXIP1,LRRFIP1,GPATCH3,RHEB,INTS6,PPP6R3,FUT8,SMG5,BRD4,STT3A,PTDSS2,DHDD</p>                                                                                                                                                                                                                                                                                                                                                                                                                                                                                                                                                                                                                                              |

|  |  |  |                                                                                                                                                                                                                                                                                                                                                                                                                                                                                                                                                                                                                                                                                                                                                                                                                                                                                                                                                                                                                                                                                                                                                                                                                                                                                                                                                                                                                                                                                                                                                                                                                                                                                                                                                                                                                                                                                                                                                                                                                                                                                                                                                                                                                                                                                                                                                                                                                                                                                                                                                                                                                                                                                                                                                                                                                                                                                                                                                                                                                                                                                                                                                                                                  |
|--|--|--|--------------------------------------------------------------------------------------------------------------------------------------------------------------------------------------------------------------------------------------------------------------------------------------------------------------------------------------------------------------------------------------------------------------------------------------------------------------------------------------------------------------------------------------------------------------------------------------------------------------------------------------------------------------------------------------------------------------------------------------------------------------------------------------------------------------------------------------------------------------------------------------------------------------------------------------------------------------------------------------------------------------------------------------------------------------------------------------------------------------------------------------------------------------------------------------------------------------------------------------------------------------------------------------------------------------------------------------------------------------------------------------------------------------------------------------------------------------------------------------------------------------------------------------------------------------------------------------------------------------------------------------------------------------------------------------------------------------------------------------------------------------------------------------------------------------------------------------------------------------------------------------------------------------------------------------------------------------------------------------------------------------------------------------------------------------------------------------------------------------------------------------------------------------------------------------------------------------------------------------------------------------------------------------------------------------------------------------------------------------------------------------------------------------------------------------------------------------------------------------------------------------------------------------------------------------------------------------------------------------------------------------------------------------------------------------------------------------------------------------------------------------------------------------------------------------------------------------------------------------------------------------------------------------------------------------------------------------------------------------------------------------------------------------------------------------------------------------------------------------------------------------------------------------------------------------------------|
|  |  |  | <p> <i>S,VKORC1L1,RRP9,MRPL1,ZNF581,SPIN4,ZNF74,S<br/>H3YL1,MRPL11,RPUSD4,CMBL,DENR,CDC123,RNASE<br/>H2C,HROB,MRPS30,CTDP1,NUP155,MED1,NVL,SRM,<br/>HNRNPL,NLN,PWP1,DOLPP1,WDR46,MCM10,OXA1L,E<br/>FTUD2,CHRA1,CRCP,KMT2D,TAF4B,PSMA3,PQBP1,<br/>PSMD3,AIFM2,PSPC1,CEP350,MAD2L2,MRRF,POLDI<br/>P2,PSMC3,ZBTB40,DHX38,ADNP2,GART,NT5C3A,FB<br/>XO45,ARID2,DDX23,PATZ1,TRIM44,TRNT1,RNPS1,<br/>LHX4,ZNF512B,RBL1,PPP3R1,SLC25A46,HIF1AN,U<br/>SP11,RPUSD1,SS18L1,MED29,PAFAH1B1,HNRNPH1,<br/>USP14,RAB7A,LIMD1,DNMT1,LYL1,BICD1,PPP5C,B<br/>AP1,DUS1L,ANAPC7,SUB1,UTF2H1,DHX16,TOP2B,L<br/>YAR,LRWD1,SLC39A10,CCNH,NAB2,EXOC7,EIF4EBP<br/>2,CCT6A,KAT7,CLTC,TSR3,EEF2,MSRA,AURKAIP1,<br/>SNHG20,WDR5,CCT8,FUBP3,IMP4,SNHG17,BCCIP,S<br/>PRY2,DLAT,NOB1,SBF1,RNF40,CUL3,ARPP19,CMK<br/>1,NONO,MEF2C,UBR3,TCF3,TEX15,MAF1,GID8,CLS<br/>PN,NOL9,MVK,NBAS,PLK4,CCNY,SLK,ZFYVE26,PRP<br/>F6,ZC3H4,ZNF26,ZNF24,GSPT1,PEPD,GRSF1,UBQL<br/>N4,ACTR8,PSMC5,AGPAT3,STK35,ZC3HAV1,HNRNPA<br/>3,MAPK1,STAR,ZNRF1,EEF1D,CASP3,POLR1E,ATP2<br/>A2,PKP3,ABT1,PCLAF,WDR36,HBG1,PDSS1,CERS2,<br/>DHX33,PGAM5,NSMAF,CTR9,NCOA5,FADS1,ZFP91,D<br/>HX15,UIMC1,PUM1,MTOR,PDPR,RPRD2,UTP18,IKZF<br/>3,KANSL1,CPSF3,SPEN,LCLAT1,GOT2,VDAC1,SMG9<br/>,SMARCA5,CWC25,SF3A2,H2AW,EIF3D,ZNF45,RSF1<br/>,TFAP4,PTP4A2,PRMT6,NIFK,FAF1,HNRNPA0,BAG6<br/>,ZNF131,PCYT1A,SBNO1,ZNF431,DHFR,MTDH,HSPA<br/>9,MCCC1,TCF7L2,ZNF239,SRRM2,MRPL15,PRAME,G<br/>MPS,ASCC3,UROD,UBE2L3,THOC1,PSMC2,MCMBP,SE<br/>TMAR,RPTOR,PPP1R10,MRPS35,HECTD1,CSTF2,TNF<br/>,RAVER1,RABGGTB,EIF4B,PPP4R3A,SAMSN1,WDR33<br/>,PPP2R5A,TRMT61A,IGF2BP3,PDCC7,MED28,ELL2,<br/>PUM2,WDR3,MT-<br/>TL1,SSBP3,SNRPA,ZNF586,BACH1,DDX10,RBM10,C<br/>ERT1,SETX,NFILZ,TRMT2A,AP3D1,STK24,METTL8,<br/>APEX1,BPTF,ATP6V1G1,UFC1,EDC4,ICE1,RIOK2,N<br/>AA15,ARID1A,PITHD1,PPP1CC,ZC3H14,B4GALT5,C<br/>DC27,HERC2,SRSF10,CTSL,SBDS,C1QBP,VPS72,PP<br/>M1H,ZNF587B,CRK,TICRR,MED15,EOGT,STK25,CAP<br/>NS1,SRSF8,WDR74,PAK2,PRPF4,PRMT5,SNX9,PCBP<br/>2,PTDSS1,ADD1,TRMT6,RBMX,RNF126,BAZ1A,DPYS<br/>,GPX4,YJU2,WDR70,MCCC2,MLLT3,ALG8,RAD23B,T<br/>AF4,RBM14,RBM8A,KDM3B,BOP1,LRP8,SETD2,ZNF3<br/>26,INTS13,RPIA,UCK2,FEN1,CHAF1A,TRMO,ZNF28<br/>2,DYRK1A,PHF3,TFDP2,WDR12,UTF3C6,SLBP,CUL4<br/>A,JADE2,NUCKS1,SDCBP,PSMD1,UTP25,AMD1,PRPF<br/>38A,SSB,CDC37,ECHDC1,AGPAT5,GNL3L,DNTTIP2,<br/>CYB5B,IBA57,RNU6-322P,NSRP1,MT-<br/>TF,TFIP11,PSMB2,WAC,EIF3G,ADI1,DHX29,ARHGE<br/>F2,BRCA2,POLR2D,ZDHHC5,EIF3M,WTAP,COPS2,BC<br/>L7B,RBM42,ZFX,ZC3H7B,ACLY,SNRPD1,PAN3,MED1<br/>3L,PAF1,ZC3H18,BIRC6,FASTKD2,PHB2,TCOF1,GR<br/>B10,XRCC2,PDS5A,BRCC3,ZNF75A,SMARCB1,TRIR,<br/>CREBBP,EXOSC3,WBP11,EPRS1,COPS3,UBE4B,INSI<br/>G1,LSM14A,NUP98,HNRNPUL1,CNOT1,LYN,ASH1L,G<br/>EMIN5,PLAGL2,APC,POLR1B,CAPN1,ELOF1,WDR6,N<br/>FYC,SF1,PELP1,XRN2,EZR,TRUB2,DDX20,URM1,DD<br/>X51,MMS19,SGPP2,ELOA,TAF9,ACAT2,YWHAG,ELAV<br/>L1,UTP15,VCP,DNAJB12,RYBP,SAFB2,DHX34,PSIP<br/>1,CSNK1G2,DCAF13,RBM12,CDK4,DVL2,POLR3C,TH<br/>G1L,MRPS2,RBM25,SETD1A,RRP12,SCAP,WDR82,SM<br/>C1A,AGO2,E2F4,VPS26A,FOXRED2,G3BP1,RNF220,<br/>TBC1D14,RRP36,MCM6,AQR,ARL8B,DDX18,IER3,AT<br/>P6V0D1,ADNP,NFKB1,UBTF,ZNF622,BRD2,CHD7,RB<br/>M15B,USP37,HNRNPA1,GAR1,RRS1,PPARGC1B,MAGO </i> </p> |
|--|--|--|--------------------------------------------------------------------------------------------------------------------------------------------------------------------------------------------------------------------------------------------------------------------------------------------------------------------------------------------------------------------------------------------------------------------------------------------------------------------------------------------------------------------------------------------------------------------------------------------------------------------------------------------------------------------------------------------------------------------------------------------------------------------------------------------------------------------------------------------------------------------------------------------------------------------------------------------------------------------------------------------------------------------------------------------------------------------------------------------------------------------------------------------------------------------------------------------------------------------------------------------------------------------------------------------------------------------------------------------------------------------------------------------------------------------------------------------------------------------------------------------------------------------------------------------------------------------------------------------------------------------------------------------------------------------------------------------------------------------------------------------------------------------------------------------------------------------------------------------------------------------------------------------------------------------------------------------------------------------------------------------------------------------------------------------------------------------------------------------------------------------------------------------------------------------------------------------------------------------------------------------------------------------------------------------------------------------------------------------------------------------------------------------------------------------------------------------------------------------------------------------------------------------------------------------------------------------------------------------------------------------------------------------------------------------------------------------------------------------------------------------------------------------------------------------------------------------------------------------------------------------------------------------------------------------------------------------------------------------------------------------------------------------------------------------------------------------------------------------------------------------------------------------------------------------------------------------------|

|            |                                                                         |                        |                                                                                                                                                                                                                                                                                                                                                                                                                                                                                                                                                                                                                                                                                                                                                                                                                                                                                                                                                                                                                                                                                                                                                                                                                                                                                                                                                                                                                                                                                                                                                                                                                                                                                                                                                                                                                                                                                                                                                                                                                                                                                                                                                                                                                                                                                                                                                                                                                                                                                                                                                                                                                                                                                                       |
|------------|-------------------------------------------------------------------------|------------------------|-------------------------------------------------------------------------------------------------------------------------------------------------------------------------------------------------------------------------------------------------------------------------------------------------------------------------------------------------------------------------------------------------------------------------------------------------------------------------------------------------------------------------------------------------------------------------------------------------------------------------------------------------------------------------------------------------------------------------------------------------------------------------------------------------------------------------------------------------------------------------------------------------------------------------------------------------------------------------------------------------------------------------------------------------------------------------------------------------------------------------------------------------------------------------------------------------------------------------------------------------------------------------------------------------------------------------------------------------------------------------------------------------------------------------------------------------------------------------------------------------------------------------------------------------------------------------------------------------------------------------------------------------------------------------------------------------------------------------------------------------------------------------------------------------------------------------------------------------------------------------------------------------------------------------------------------------------------------------------------------------------------------------------------------------------------------------------------------------------------------------------------------------------------------------------------------------------------------------------------------------------------------------------------------------------------------------------------------------------------------------------------------------------------------------------------------------------------------------------------------------------------------------------------------------------------------------------------------------------------------------------------------------------------------------------------------------------|
|            |                                                                         |                        | <p> <i>H, PBRM1, CTCF, HHEX, ANKRD17, HNRNPR, RRM2, RRM1, PI4KA, ELF1, ZNF614, NSD1, RSL1D1, CCT3, CDK7, RNF138, SETD1B, PPIF, PKM, FOXK2, HMGB1, MAEA, BZW1, SMARCD1, GNAQ, CANX, YY1, NOL8, MLLT10, IRAK1, PUS7, PIK3C2B, IP6K1, NAT10, TRMT10C, SNU13, SRSF6, EP400, AASDHPPT, MTHFD1, ADSS2, SART1, CEBPZ, LEPR, MECP2, CSDE1, PARD3, MBNL1, SKI, PRKAR2B, TKT, RRP15, DDX54, AZIN1, N4BP2, TARDBP, LARP4, XRCC6, PNN, RPL22, ABI1, PCNA, CDC25A, MBD1, CSNK2A2, UPF2, DDX3X, IDI1, HDGF, ZNF789, VPS35, ATP5MC3, EIF4G2, MCM2, JUND, PFAS, HCFC1, CHEK1, AATF, CLN6, ZMPSTE24, PRMT7, OXCT1, RETREG2, SLC25A5, SLTM, CYP3A5, URB1, VAC14, UBP1, POLE, TRRAP, PIP5K2, EXOSC9, CSK, POLR2A, DNAJA1, NUP62, TSR1, RBM19, SLC19A1, XPO1, PPIA, PRPF3, IK, SERPINE1, TPR, ENC1, SRSF7, UTP20, TGFBRA1, ZFP36L2, SF3B4, STK17A, PPRC1, SLC38A2, EBNA1BP2, KEAP1, TFB2M, UBE2N, BAZ1B, NRIP1, MRT04, VAPA, TLK1, GFM1, MYBBP1A, DDB1, BACH2, PITX1, GTF3C4, LRRC47, NASP, ASXL2, CHST3, TCP1, CENPF, YWHAB, RALY, ENO1, CCT5, FUBP1, POLE3, CDK6, CDC5L, CHD3, ST3GAL2, RAN, BEND3, C19ORF48, UBC, WDR81, ZNF787, TFAM, AK2, PP2CA, SSU72, MSH2, CDK12, ZBTB2, DIDO1, GLYR1, MAN2A2, KMT2A, MCM3, NOSTRIN, GRWD1, PAICS, ZNF598, SLC30A10, CERS6, PRDX1, SNHG3, GATAD2A, DKC1, DDX1, CUL1, THUMP1, CTPS1, EWSR1, DDX49, CASC3, SSRP1, ARID1B, CPSF7, RRP1, ZNF33B, ATP6V0A1, HNRNPAB, KAT6A, USP36, RBBP4, CNPPD1, SAFB, NCBP1, HEATR1, CCT2, HSP90AB1, EIF3B, DUS3L, PA2G4, HNRNPK, SMG1, DHX37, FDF1, PRPF19, SMARCA4, EIF3J, PRKDC, YES1, ZNF121, TRA2B, PRMT1, HNRNPC, MALT1, WWP2, SF3A3, SUPT16H, HMGA1, FARSA, CELF1, RBMXL1, XRCC5, DDX5, UTP4, DEK, LMO2, DDX46, LSS, EIF4A3, NDST1, TRIP12, IPO7, DDX39A, DDX56, SLC38A1, CIZ1, CDT1, NOP56, HNRNPDL, CORO1C, KHDRBS1, HNRNP, LRPPRC, EIF5A, CTDSP1, SUPT6H, RANBP2, DNAB6, NOLC1, SNRNP200, SREBF2, CBFA2T3, ABCF1, DANCR, ACACA, MGA, NSUN2, AP5Z1, HSPD1, PIM2, GAPDH, YBX1, LIN28B, EIF5B, PCYT2, ATP6V1C1, RBM3, PGD, SF3A1, AXIN1, MPHOSPH10, PES1, IPO5, RREB1, EP300, TGFB1, DAZAP1, ALYREF, RRP1B, FOSB, PPM1G, SRRP, PABPC1, SERBP1, AHNK, PRPF8, SF3B3, PTMA, THRAP3, MLLT1, ELOVL6, HNRNPF, MTND1, NPM1, RIF1, CITED2, ETF1, SON, WDR43, TFRC, RNX1, NQO1, EIF4G1, TRIM28, ACP5, U2AF2, NR2F2, BCLAF1, ECPAS, SRSF2, HSP90AA1, MDN1, NFATC3, ZNF521, CAPRIN1, TRMT1, SQLE, MCM4, TRIM24, NOP58, RESF1, HNRNPA2B1, LARP1, SQSTM1, HBZ, PTBP1, CCAR1, MAT2A, DDX21, HMGCS1, SFPQ, SCD, PABPC4, HNRNPM, POLR1A, KCNH2, SRSF3, EIF3A, MCM7, SMARCC1, MYC, SET, VGF, BTG1, MT-CYB, IGF2BP1, FOS, GCLM, HMGCR, SPTA1, MYB, ODC1, KHSRP, ZEB2, RELN, FUS, ILF3, FASN, GLUL, ACTB, DHX9, HNRNPU, SLC20A1, MCM5, NCL, EGR1, HSPA8</i> </p> |
| GO:0045935 | positive regulation of nucleobase-containing compound metabolic process | 1.9429071964258657e-38 | <p> <i>HRAS, TXK, MTF, KMT2B, SUPT7L, MED16, NOL11, BICRA, MTA2, PHF5A, NACA, MED6, PRXL2C, PHB, METTL3, TCF20, PAXIP1, GPATCH3, BRD4, MED1, NVL, PWP1, KMT2D, TAF4B, PQBP1, MAD2L2, PSMC3, ARID2, PATZ1, TRIM44, LHX4, PPP3R1, SS18L1, MED29, LYL1, SUB1, GTF2H1, TOP2B, LYAR, CCT6A, KAT7, WDR5, CCT8, FUBP3, MEF2C, TCF3, PRPF6, ZNF24, GRSF1, ACTR8, PSMC5, ZC3HAV1, MAPK1, ABT1, DHX33, UIMC1, PUM1, MTOR, IKZF3, KANSL1, SMARCA5, RSF1, TFAP4, FAF1, ZNF113, MTDH, TCF7L2, UBE2L3, THOC1, SETMAR, RPTOR, PPIR10, TNF, MED28, ELL2, SSBP3, BACH1, SETX, AP3D1, APEX1, BPTF, ICE1, RIOK2, NAA15, ARID1A, PITHD</i> </p>                                                                                                                                                                                                                                                                                                                                                                                                                                                                                                                                                                                                                                                                                                                                                                                                                                                                                                                                                                                                                                                                                                                                                                                                                                                                                                                                                                                                                                                                                                                                                                                                                                                                                                                                                                                                                                                                                                                                                                                                                                                                           |

|            |                                                  |                        |                                                                                                                                                                                                                                                                                                                                                                                                                                                                                                                                                                                                                                                                                                                                                                                                                                                                                                                                                                                                                                                                                                                                                                                                                                                                                                                                                                                                                                                                                                                                                                                                                                                                                                                                                                                                                                                                                                                                                                                                                                               |
|------------|--------------------------------------------------|------------------------|-----------------------------------------------------------------------------------------------------------------------------------------------------------------------------------------------------------------------------------------------------------------------------------------------------------------------------------------------------------------------------------------------------------------------------------------------------------------------------------------------------------------------------------------------------------------------------------------------------------------------------------------------------------------------------------------------------------------------------------------------------------------------------------------------------------------------------------------------------------------------------------------------------------------------------------------------------------------------------------------------------------------------------------------------------------------------------------------------------------------------------------------------------------------------------------------------------------------------------------------------------------------------------------------------------------------------------------------------------------------------------------------------------------------------------------------------------------------------------------------------------------------------------------------------------------------------------------------------------------------------------------------------------------------------------------------------------------------------------------------------------------------------------------------------------------------------------------------------------------------------------------------------------------------------------------------------------------------------------------------------------------------------------------------------|
|            |                                                  |                        | <p>1,VPS72,MED15,PRMT5,PCBP2,RBMX,BAZ1A,MLLT3,TAF4,RBM14,DYRK1A,TFDP2,NUCKS1,WAC,ARHGEF2,BRCA2,POLR2D,BCL7B,ZFX,PAN3,PAF1,ZC3H18,BRCC3,SMARCB1,CREBBP,EXOSC3,NUP98,CNOT1,ASH1L,PLAGL2,NFYC,PELP1,MMS19,TAF9,UTP15,VCP,RYBP,PSIP1,DVL2,AGO2,E2F4,NFKB1,UBTF,CHD7,HNRNPA1,PPARGC1B,PBRM1,CTCF,HHEX,ELF1,NSD1,CCT3,CDK7,FOXK2,HMGB1,SMARCD1,YY1,MLLT10,EP400,CEBPZ,MECP2,CSDE1,SKI,TARDBP,XRCC6,PCNA,DDX3X,HDGF,JUND,HCFC1,AATF,UBP1,TRRAP,EXOSC9,NUP62,ZFP36L2,SF3B4,PPRC1,SLC38A2,UBE2N,BAZ1B,NRIP1,MYBBP1A,PITX1,ASXL2,TCP1,ENO1,CCT5,CDC5L,CHD3,BEND3,TFAM,MSH2,CDK12,GLYR1,KMT2A,GATAD2A,DKC1,ARID1B,ZNF33B,HNRNPAB,KAT6A,RBBP4,NCBP1,HEATR1,CCT2,HSP90AB1,HNRNPK,PRPF19,SMARCA4,PRKDC,YES1,TRA2B,WWP2,SUPT16H,HMGA1,CELF1,RBMXL1,XRCC5,DDX5,DEK,LMO2,CIZ1,CDT1,HNRNPD,EIF5A,SUPT6H,NOLC1,SREBF2,MGA,PIM2,YBX1,LIN28B,RBM3,AXIN1,RREB1,EP300,TGFBR1,DAZAP1,RRP1B,FOSB,PABPC1,SF3B3,PTMA,THRAP3,NPM1,RIF1,CITED2,WDR43,TFRC,RUNX1,TRIM28,U2AF2,NR2F2,BCLAF1,HP90AA1,NFATC3,ZNF521,TRIM24,HNRNPA2B1,SQSTM1,CCAR1,DDX21,SFPQ,KCNH2,SMARCC1,MYC,IGF2BP1,FOS,MYB,KHSRP,ZEB2,FUS,ILF3,ACTB,DHX9,HNRNPU,NCL,EGR1,HSPA8</p>                                                                                                                                                                                                                                                                                                                                                                                                                                                                                                                                                                                                                                                                                                                                                                                                                                                                                                                         |
| GO:0010556 | regulation of macromolecule biosynthetic process | 3.9651577078188344e-38 | <p>HRAS, TXK, MITF, JMJD1C, ZNF274, KMT2B, SUPT7L, MACROH2A1, BRD9, MED16, NOL11, BICRA, MTA2, TIRAP, OTUD6B, RIOX1, PHF5A, NACA, MED6, CBX3, PHB, METTL3, EZH2, TCF20, PAXIP1, LRRFIP1, GPATCH3, INTS6, SMG5, BRD4, ZNF581, SPIN4, ZNF74, RPUSD4, CDC123, CTDP1, MED1, NVL, HNRNPL, PWP1, KMT2D, TAF4B, PQBP1, PSCP1, CEP350, MAD2L2, PSMC3, ZBTB40, ADNP2, ARID2, PATZ1, TRIM44, LHX4, ZNF512B, RBL1, PP3R1, HIF1AN, SS18L1, MED29, USP14, LIMD1, DNMT1, LYL1, BAP1, SUB1, GTF2H1, TOP2B, LYAR, CCNH, NAB2, EIF4EBP2, CCT6A, KAT7, CLTC, EE2, WDR5, CCT8, FUBP3, CUL3, NONO, MEF2C, TCF3, MAF1, PRPF6, ZC3H4, ZNF26, ZNF24, GSPT1, ACTR8, PSMC5, MAPK1, ABT1, DHX33, CTR9, NCOA5, FADS1, ZFP91, UIMC1, PUM1, MATOR, IKZF3, KANSL1, SPEN, SMARCA5, EIF3D, ZNF45, RSF1, TFAP4, PRMT6, FAF1, ZNF131, SBN1, ZNF431, DHFR, MTDH, TCF7L2, ZNF239, PRAME, UBE2L3, THOC1, RPTOR, TNF, EIF4B, IGF2BP3, MED28, ELL2, PUM2, SSBP3, ZNF586, BACH1, RBM10, SETX, NFILZ, AP3D1, METTL8, APEX1, BPTF, ICE1, NAA15, ARID1A, PITHD1, SRSF10, C1QBP, VPS72, ZNF587B, CRK, MED15, PRMT5, PCBP2, RBMX, BAZ1A, MLLT3, TAF4, RBM14, RBM8A, KDM3B, LRP8, SETD2, ZNF326, INTS13, ZNF282, DYRK1A, TFDP2, JADE2, NUCKS1, SDCBP, GNL3L, WAC, DHX29, ARHGEF2, BRCA2, POLR2D, COPS2, BCL7B, ZFX, PAN3, MED13L, PAF1, FASTKD2, PHB2, TCOF1, ZNF75A, SMARCB1, CREBBP, EXOSC3, EPRS1, LSM14A, NUP98, CNOT1, ASH1L, GEMIN5, PLAGL2, NFYC, SF1, PELP1, EZR, TRUB2, DDX20, MMS19, ELOA, TAF9, ELAVL1, UTP15, RYBP, SAFB2, PSIP1, CDK4, DVL2, POLR3C, WDR82, AGO2, E2F4, RNF220, ADNP, NFKB1, UBTF, BRD2, CHD7, HNRNPA1, PPARGC1B, MAGOH, PBRM1, CTCF, HHEX, ELF1, ZNF614, NSD1, CCT3, CDK7, PKM, FOXK2, HMGB1, BZW1, SMARCD1, YY1, MLLT10, IRAK1, PUS7, NAT10, TRMT10C, EP400, CEBPZ, MECP2, CSDE1, SKI, DDX54, TARDBP, LARP4, XRCC6, PCNA, MBD1, DDX3X, HDGF, ZNF789, EIF4G2, JUND, HCFC1, CHEK1, AATF, ZMPSTE24, SLTM, UB1, TRRAP, EXOSC9, NUP62, PPIA, TPR, ENC1, TGFBRAP1, ZFP36L2, PPRC1, KEAP1, TFB2M, UBE2N, BAZ1B, NRIP1, MYBBP1A, BACH2, PITX1, ASXL2, TCP1, CENP</p> |



|            |                                                |                            |                                                                                                                                                                                                                                                                                                                                                                                                                                                                                                                                                                                                                                                                                                                                                                                                                                                                                                                                                                                                                                                                                                                                                                                                                                                                                                                                                                                                                                                                                                                                                                                                           |
|------------|------------------------------------------------|----------------------------|-----------------------------------------------------------------------------------------------------------------------------------------------------------------------------------------------------------------------------------------------------------------------------------------------------------------------------------------------------------------------------------------------------------------------------------------------------------------------------------------------------------------------------------------------------------------------------------------------------------------------------------------------------------------------------------------------------------------------------------------------------------------------------------------------------------------------------------------------------------------------------------------------------------------------------------------------------------------------------------------------------------------------------------------------------------------------------------------------------------------------------------------------------------------------------------------------------------------------------------------------------------------------------------------------------------------------------------------------------------------------------------------------------------------------------------------------------------------------------------------------------------------------------------------------------------------------------------------------------------|
|            |                                                |                            | <p>F, RALY, ENO1, CCT5, FUBP1, CDK6, CDC5L, CHD3, BEN D3, ZNF787, TFAM, PPP2CA, SSU72, CDK12, ZBTB2, GL YR1, KMT2A, NOSTRIN, GATAD2A, DKC1, DDX1, EWSR1, CASC3, ARID1B, ZNF33B, HNRNPAB, KAT6A, RBBP4, SA FB, NCBP1, HEATR1, CCT2, HSP90AB1, EIF3B, DUS3L, PA2G4, HNRNPK, SMARCA4, PRKDC, YES1, ZNF121, PRM T1, HNRNPC, MALT1, WWP2, SUPT16H, HMGA1, CELF1, X RCC5, DDX5, UTP4, DEK, LMO2, EIF4A3, KHDRBS1, HNR NPD, LRPPRC, EIF5A, CTDSP1, SUPT6H, DNAJB6, NOLC 1, SREBF2, CBFA2T3, ABCF1, MGA, PIM2, GAPDH, YBX1, EIF5B, RBM3, AXIN1, RREB1, HSPH1, EP300, TGFBR1, RRP1B, FOSB, SRRT, PABPC1, SF3B3, PTMA, THRAP3, MLLT1, NPM1, RIF1, CTED2, ETF1, WDR43, TFR3, RUN X1, EIF4G1, TRIM28, NR2F2, BCLAF1, SRSF2, HSP90A A1, NFATC3, ZNF521, CAPRIN1, TRIM24, RESF1, HNRN PA2B1, LARP1, SQSTM1, CCAR1, DDX21, SFPQ, KCNH2, SMARCC1, MYC, SET, BTG1, IGF2BP1, FOS, MYB, KHSRP, ZEB2, RELN, FUS, ILF3, ACTB, DHX9, HNRNPU, NCL, E GR1, HSPA8</p>                                                                                                                                                                                                                                                                                                                                                                                                                                                                                                                                                                                                                                                              |
| GO:1903311 | regulatio<br>n of mRNA<br>metabolic<br>process | 9.149991572<br>233825e-38  | <p>TIRAP, CWC22, METTL3, HNRNPL, RNPS1, NBAS, ZC3HA V1, PKP3, PUM1, HNRNPA0, RAVR1, IGF2BP3, PUM2, S NRPA, RBM10, APEX1, ZC3H14, SRSF10, C1QBP, PRMT5, RBMX, RBM8A, DYRK1A, NSRP1, POLR2D, WTAP, RBM42, PAN3, PAF1, FASTKD2, EXOSC3, NUP98, CNOT1, SF1, ELAVL1, SAFB2, DHX34, RBM25, AGO2, RBM15B, HNRNP A1, MAGOH, SRSF6, CSDE1, MBNL1, TARDBP, SLTM, EXO SC9, SRSF7, ZFP36L2, SF3B4, CASC3, CPSF7, HNRNPA B, SAFB, NCBP1, HNRNPK, PRPF19, TRA2B, HNRNPC, CE LF1, RBMXL1, DDX5, EIF4A3, KHDRBS1, HNRNPD, SUPT 6H, YBX1, RBM3, DAZAP1, PABPC1, SERBP1, THRAP3, N PM1, SON, U2AF2, SRSF2, HNRNPA2B1, LARP1, PTBP1, PABPC4, HNRNPM, SRSF3, IGF2BP1, KHSRP, FUS, DHX9, HNRNPU, NCL, HSPA8</p>                                                                                                                                                                                                                                                                                                                                                                                                                                                                                                                                                                                                                                                                                                                                                                                                                                                                                                                |
| CC         |                                                |                            |                                                                                                                                                                                                                                                                                                                                                                                                                                                                                                                                                                                                                                                                                                                                                                                                                                                                                                                                                                                                                                                                                                                                                                                                                                                                                                                                                                                                                                                                                                                                                                                                           |
| GO:0005654 | nucleopla<br>sm                                | 8.600361741<br>950438e-141 | <p>HRAS, NOP14, CENPN, ACSF3, SNRBP, MITF, PPP6C, JM JD1C, MIS18BP1, DAP3, RBM48, MSH3, CHTOP, KMT2B, AFF1, SUPT7L, SREK1, MACROH2A1, BRD9, MED16, MUS 81, NOL11, ITFG2, MTA2, RAD51C, UTP3, CWC22, POLR 3E, DCAF7, MTREX, RIOX1, PHF5A, POLR1C, MED6, CBX 3, PHB, METTL3, EZH2, TCF20, DCLRE1C, NOC4L, RFW D3, MFAP1, PAXIP1, GPATCH3, INTS6, PPP6R3, H4C5, N CAPH2, BRD4, TIMM17A, RRP9, SPIN4, ZNF74, AHCTF1, RPUSD4, CTD1P1, MED1, NVL, POM121C, HNRNPL, MYO1 6, WDR46, MCM10, EFTUD2, CRCP, RANBP3, FRMD8, KMT 2D, STAG2, CASP8, TAF4B, PSMA3, PQBP1, PSMD3, PSP C1, MAD2L2, PSMC3, NAA11, DHX38, NT5C3A, NOP16, A RID2, DDX23, PATZ1, TRNT1, RNPS1, ZNF512B, RBL1, PPP3R1, HIF1AN, USP11, SS18L1, RBM45, MED29, NOS IP, STAG1, HNRNPH1, LIMD1, DNMT1, LYL1, PPP5C, BA P1, ANAPC7, SUB1, GTF2H1, DHX16, BUB3, TOP2B, LYA R, LRWD1, CCNH, NAB2, KAT7, TPP2, MSRA, AURKAIP1, WDR5, CCT8, FUBP3, IMP4, BCCIP, NOB1, SBF1, RNF40, CUL3, ARPP19, CMPK1, NONO, MEF2C, TCF3, MAF1, GI D8, CLSPN, NOL9, PRPF6, ZC3H4, ZNF24, GRSF1, NXF1, UBQLN4, ACTR8, FAHD1, PSMC5, STK35, HNRNPA3, MA PK1, EEF1D, CASP3, POLR1E, PKP3, PCLAF, DHX33, CT R9, NCOA5, ZFP91, SDAD1, DHX15, UIMC1, PUM1, MTOR, RPRD2, UTP18, IKZF3, KANSL1, CPSF3, SPEN, SMARC A5, CWC25, SF3A2, ZNF45, RSF1, TFAP4, PRMT6, KPNA 4, NIFK, FAF1, HNRNPA0, BAG6, EMD, ZNF131, TASOR2, MTDH, BAIAP2, TCF7L2, SRRM2, PRAME, ASCC3, UROD, UBE2L3, THOC1, PSMC2, MCMBP, RPTOR, PPIL2, PPP1 R10, HECTD1, CSTF2, GRPEL1, PPP4R3A, WDR33, NIP7, TRMT61A, PDCD7, MED28, ELL2, HAT1, WDR3, SNRPA, BACH1, RBM10, CERT1, SETX, STK24, APEX1, BPTF, ED</p> |

|            |               |                         |                                                                                                                                                                                                                                                                                                                                                                                                                                                                                                                                                                                                                                                                                                                                                                                                                                                                                                                                                                                                                                                                                                                                                                                                                                                                                                                                                                                                                                                                                                                                                                                                                                                                                                                                                                                                                                                                                                                                                                                                                                                                                                                                                                                                                                                                                                                                                                                                                                                                                                                                                                                                                                                                                                                                                                                                                                        |
|------------|---------------|-------------------------|----------------------------------------------------------------------------------------------------------------------------------------------------------------------------------------------------------------------------------------------------------------------------------------------------------------------------------------------------------------------------------------------------------------------------------------------------------------------------------------------------------------------------------------------------------------------------------------------------------------------------------------------------------------------------------------------------------------------------------------------------------------------------------------------------------------------------------------------------------------------------------------------------------------------------------------------------------------------------------------------------------------------------------------------------------------------------------------------------------------------------------------------------------------------------------------------------------------------------------------------------------------------------------------------------------------------------------------------------------------------------------------------------------------------------------------------------------------------------------------------------------------------------------------------------------------------------------------------------------------------------------------------------------------------------------------------------------------------------------------------------------------------------------------------------------------------------------------------------------------------------------------------------------------------------------------------------------------------------------------------------------------------------------------------------------------------------------------------------------------------------------------------------------------------------------------------------------------------------------------------------------------------------------------------------------------------------------------------------------------------------------------------------------------------------------------------------------------------------------------------------------------------------------------------------------------------------------------------------------------------------------------------------------------------------------------------------------------------------------------------------------------------------------------------------------------------------------------|
|            |               |                         | <p> <i>C4, ICE1, RIOK2, NAA15, ARID1A, NUP43, AMMECR1, SPECC1, PPP1CC, CAVIN2, ZC3H14, CDC27, HERC2, SRSF10, AKAP8, SBDS, RCC1, VPS72, PPM1H, TICRR, MED15, SRSF8, WDR74, PRPF4, PRMT5, PCBP2, ADD1, TRMT6, RBMX, RNF126, MLLT3, RAD23B, TAF4, RBM14, RBM8A, KDM3B, BOP1, SETD2, ZNF326, API5, INTS13, BTBD1, FEN1, DYRK1A, TFDP2, WDR12, GTF3C6, SLBP, CUL4A, DNAJC8, JADE2, NUCKS1, SDCBP, PSMD1, UTP25, NUP50, PRPF38A, GNL3L, DNTTIP2, NSRP1, TFIP11, PSMB2, WAC, BRCA2, POLR2D, WTAP, COPS2, NIN, RBM42, ZFX, ACLY, SNRPD1, PAF1, ZC3H18, TCOF1, XRCC2, PDS5A, BRCC3, SMARCB1, CREBBP, EXOSC3, WBP11, COPS3, NUP98, HNRNPUL1, ASH1L, GEMIN5, APC, POLR1B, DDX42, ELOF1, NFYC, SF1, PELP1, XRN2, DDX20, MMS19, ELOA, TAF9, ELAVL1, UTP15, VCP, WASHC5, RYBP, SAFB2, GBP2, PSIP1, DCAF13, BEX4, RBM12, CDK4, DVL2, PNO1, POLR3C, RBM25, SETD1A, WDR82, SMC1A, AGO2, E2F4, PCM1, TBC1D14, SAE1, RRP36, MCM6, AQR, UBA2, NFKB1, UBTf, ZNF622, BRD2, CHD7, RBM15B, USP37, HNRNPA1, GAR1, RRS1, PPARGC1B, MAGOH, PBRM1, CTCF, ANKRD17, HNRNPR, ELF1, NSD1, CDK7, H3-3B, SETD1B, FOXK2, KIF2A, HMGB1, MAEA, SMARCD1, YY1, MLLT10, IRAK1, PIK3C2B, IP6K1, NAT10, TRMT10C, SNU13, SRSF6, EP400, SART1, MECP2, MBNL1, SKI, TKT, DDX54, TARDBP, XRCC6, PNN, PCNA, CDC25A, MBD1, CSNK2A2, DDX3X, HDGF, NCAPH, ZNF789, MCM2, JUND, HCFC1, CHEK1, AATF, ECSIT, PRMT7, SLTM, POM121, CHAMP1, UBP1, POLE, TRRAP, NUDC, EXOSC9, CCDC86, DNAJC7, SUMO3, NUP62, TSR1, RBM19, XPO1, PRPF3, IK, TPR, ENC1, SRSF7, UTP20, SF3B4, STK17A, PPRC1, KEAP1, UBE2N, BAZ1B, NRIP1, TLK1, TEX10, MYBBP1A, DDB1, BACH2, PSMG1, GTF3C4, NASP, ASXL2, CENPF, FUBP1, POLE3, CDK6, CDC5L, CHD3, NUP153, RAN, BENND3, UBC, SSU72, MSH2, CDK12, ZBTB2, GLYR1, KMT2A, MCM3, GRWD1, H4C8, GATAD2A, DKC1, DDX1, H2BC12, CUL1, THUMPD1, EWSR1, DDX49, CASC3, SSRP1, ARID1B, KPNB1, CPSF7, TXNRD1, ATP6V0A1, HNRNPAB, KAT6A, USP36, RBBP4, SAFB, NCBP1, HEATR1, HSP90AB1, HNRNPK, SMG1, DHX37, PRPF19, SMARCA4, PRKDC, TRA2B, PRMT1, HNRNPC, SF3A3, SUPT16H, HMGA1, CELF1, XRCC5, DDX5, PSME3, UTP4, DEK, LMO2, LMNB1, DDX46, EIF4A3, NUP214, TRIP12, IPO7, SURF6, DDX39A, CIZ1, CDT1, NOP56, HNRNPDL, KHDRBS1, HNRNPD, LRPPRC, CTDSP1, SUPT6H, RANBP2, DNAJB6, NOLC1, SNRNP200, SREBF2, CBFA2T3, ABCF1, MGA, NSUN2, AP5Z1, YBX1, LIN28B, RBM3, SF3A1, MPHOSPH10, PES1, ANP32B, RREB1, HSPH1, EP300, DAZAP1, ALYREF, RRP1B, FOSB, PPM1G, SRRT, PRPF8, COA7, SF3B3, PTMA, THRAP3, MLLT1, HNRNPF, NPM1, RIF1, CITED2, SON, WDR43, RUNX1, TRIM28, U2AF2, NR2F2, BCLAF1, ECPAS, SRSF2, HSP90AA1, MDN1, NFATC3, ZNF521, TRMT1, MCM4, TRIM24, NOP58, HNRNPA2B1, SPN, BAG1, SQSTM1, PTBP1, CAR1, DDX21, SFPQ, HNRNPM, POLR1A, SRSF3, ANKRD11, EIF3A, MCM7, SMARCC1, MYC, SET, BTG1, IGF2BP1, FOS, MYB, KHSRP, ZEB2, FUS, ILF3, ACTB, DHX9, HNRNPU, MCM5, NCL, EGR1, HSPA8</i> </p> |
| GO:0031981 | nuclear lumen | 1.5924688755699682e-113 | <p> <i>HRAS, NOP14, CENPN, ACSF3, SNRPB, MITF, PPP6C, JMD1C, MIS18BP1, DAP3, RBM48, PPAN, MSH3, CHTOP, ZNF274, KMT2B, AFF1, SUPT7L, SREK1, MACROH2A1, BRD9, MED16, MUS81, NOL11, ITFG2, MTA2, SNHG6, RAD51C, UTP3, CWC22, POLR3E, DCAF7, MTREX, RIOX1, PHF5A, POLR1C, MED6, CBX3, PHB, METTL3, EZH2, TCF20, DCLRE1C, NOC4L, RFWD3, MFAP1, PAXIP1, GPATCH3, INTS6, PPP6R3, H4C5, NCAPH2, BRD4, TIMM17A, RRP9, SPIN4, ZNF74, AHCTF1, RPUSD4, CTDP1, MED1, NVL, POM121C, HNRNPL, MYO16, PWP1, WDR46, MCM10, EFTUD</i> </p>                                                                                                                                                                                                                                                                                                                                                                                                                                                                                                                                                                                                                                                                                                                                                                                                                                                                                                                                                                                                                                                                                                                                                                                                                                                                                                                                                                                                                                                                                                                                                                                                                                                                                                                                                                                                                                                                                                                                                                                                                                                                                                                                                                                                                                                                                                                |

|  |  |  |                                                                                                                                                                                                                                                                                                                                                                                                                                                                                                                                                                                                                                                                                                                                                                                                                                                                                                                                                                                                                                                                                                                                                                                                                                                                                                                                                                                                                                                                                                                                                                                                                                                                                                                                                                                                                                                                                                                                                                                                                                                                                                                                                                                                                                                                                                                                                                                                                                                                                                                                                                                                                                                                                                                                                                                                                                                                                                                                                                                                                                                                                                                                                                                                                                                                                                                                                                       |
|--|--|--|-----------------------------------------------------------------------------------------------------------------------------------------------------------------------------------------------------------------------------------------------------------------------------------------------------------------------------------------------------------------------------------------------------------------------------------------------------------------------------------------------------------------------------------------------------------------------------------------------------------------------------------------------------------------------------------------------------------------------------------------------------------------------------------------------------------------------------------------------------------------------------------------------------------------------------------------------------------------------------------------------------------------------------------------------------------------------------------------------------------------------------------------------------------------------------------------------------------------------------------------------------------------------------------------------------------------------------------------------------------------------------------------------------------------------------------------------------------------------------------------------------------------------------------------------------------------------------------------------------------------------------------------------------------------------------------------------------------------------------------------------------------------------------------------------------------------------------------------------------------------------------------------------------------------------------------------------------------------------------------------------------------------------------------------------------------------------------------------------------------------------------------------------------------------------------------------------------------------------------------------------------------------------------------------------------------------------------------------------------------------------------------------------------------------------------------------------------------------------------------------------------------------------------------------------------------------------------------------------------------------------------------------------------------------------------------------------------------------------------------------------------------------------------------------------------------------------------------------------------------------------------------------------------------------------------------------------------------------------------------------------------------------------------------------------------------------------------------------------------------------------------------------------------------------------------------------------------------------------------------------------------------------------------------------------------------------------------------------------------------------------|
|  |  |  | <p> 2, CHAC1, CRCP, RANBP3, FRMD8, KMT2D, STAG2, CASP8, TAF4B, PSMA3, PQBP1, PSMD3, PSCP1, MAD2L2, PS MC3, NAA11, TIMM44, DHX38, NT5C3A, NOP16, ARID2, DDX23, PATZ1, TRNT1, RNPS1, ZNF512B, RBL1, PPP3R1, HIF1AN, USP11, SS18L1, RBM45, MED29, NOSIP, STAG1, HNRNPH1, LIMD1, DNMT1, LYL1, PPP5C, BAP1, ANAPC7, SUB1, GTF2H1, DHX16, BUB3, TOP2B, LYAR, LRWD1, CCNH, NAB2, KAT7, TPP2, MSRA, AURKAIP1, SNHG20, WDR5, CCT8, FUBP3, IMP4, SNHG17, BCCIP, NOB1, SBF1, RNF40, CUL3, ARPP19, CMPK1, NONO, MEF2C, TCF3, MAF1, GID8, CLSPN, NOL9, PLK4, PRPF6, ZC3H4, ZNF24, GRSF1, NXF1, UBQLN4, ACTR8, FAHD1, PSMC5, STK35, HNRNPA3, MAPK1, EEF1D, CASP3, POLR1E, PKP3, ABT1, PCLAF, WDR36, DHX33, CTR9, NCOA5, ZFP91, SDAD1, DHX15, UIMC1, PUM1, MTOR, RPRD2, UTP18, IKZF3, KANSL1, CPSF3, SPEN, SMARCA5, CWC25, SF3A2, ZNF45, RSF1, TFAP4, NAA50, PRMT6, KPNA4, NIFK, FAF1, HNRNPA0, BAG6, EMD, ZNF131, TASOR2, MTDH, BAIAP2, HSPA9, TCF7L2, SRRM2, PRAME, ASCC3, UROD, SLC29A2, UBE2L3, THOC1, PSMC2, MCMBP, SETMAR, RPTOR, PPIL2, PPP1R10, HECTD1, CSTF2, GRPEL1, PPP4R3A, WDR33, NIP7, TRMT61A, NOL7, PDCD7, MED28, ELL2, HAT1, WDR3, SNRPA, BACH1, RBM10, CERT1, SETX, STK24, APEX1, BPTF, EDC4, ICE1, RIOK2, NAA15, ARID1A, NUP43, AMMECR1, SPECC1, PPP1CC, CAVIN2, ZC3H14, CDC27, HERC2, SRSF10, AKAP8, SBDS, RCC1, C1QBP, VPS72, PPM1H, TICRR, MED15, SRSF8, WDR74, PRPF4, PRMT5, PCBP2, ADD1, TRMT6, RBMX, RNF126, BAZ1A, MLT3, RAD23B, TAF4, RBM14, RBM8A, KDM3B, BOP1, SETD2, ZNF326, API5, INTS13, BTBD1, FEN1, DYRK1A, TFDP2, WDR12, URB2, GTF3C6, SLBP, CUL4A, DNAJC8, JADE2, NUCKS1, SDCBP, PSMD1, UTP25, NUP50, PRPF38A, AGPAT5, GNL3L, DNTTIP2, NSRP1, TFIP11, PSMB2, WAC, BRCA2, POLR2D, WTAP, COPS2, NIN, RBM42, ZFX, ACLY, SNRPD1, PAF1, ZC3H18, PHB2, TCOF1, XRCC2, PDSSA, BRCC3, SMARCB1, CREBBP, EXOSC3, WBP11, COPS3, NUP98, HNRNPUL1, ASH1L, GEMIN5, APC, POLR1B, DX42, ELOF1, NFYC, SF1, PELP1, XRN2, EZR, DDX20, DX51, MMS19, ELOA, TAF9, ELAVL1, UTP15, VCP, WASHC5, RYBP, SAFB2, GBP2, PSIP1, CSTB, DCAF13, BEX4, RBM12, CDK4, DVL2, PNO1, POLR3C, RBM25, SETD1A, RRP12, WDR82, SMC1A, AGO2, E2F4, PCM1, RNF220, TBC1D14, GNL2, SAE1, RRP36, MCM6, AQR, DDX18, UBA2, NFKB1, UBTF, ZNF622, BRD2, CHD7, RBM15B, USP37, HNRNPA1, GAR1, RRS1, PPARGC1B, MAGOH, PBRM1, CTCF, ANKRD17, HNRNPR, ELF1, NSD1, RSL1D1, CDK7, H3-3B, SETD1B, FOXK2, KIF2A, HMGB1, MAEA, SMARCD1, YY1, NOL8, MLLT10, IRAK1, PIK3C2B, IP6K1, NAT10, TRMT10C, SNU13, SRSF6, EP400, SART1, MECP2, MBNL1, SKI, TKT, DDX54, TARDBP, XRCC6, PNN, PCNA, CDC25A, MBD1, CSNK2A2, DDX3X, HDGF, NCAPH, ZNF789, MCM2, JUND, CFL1, HCF1, CHEK1, AATF, CLN6, ECSIT, PRMT7, SLTM, URB1, POM121, CHAMP1, DNAJC21, UBP1, POLE, TRRAP, NUDC, EXOSC9, POLR2A, CCDC86, DNAJC7, SUMO3, NUP62, TSR1, RBM19, XPO1, PRPF3, IK, TPR, ENC1, SRSF7, UTP20, SF3B4, STK17A, PPRC1, EBNA1BP2, KEAP1, UBE2N, BAZ1B, NRIP1, MRT04, TLK1, TEX10, MYBBP1A, DDB1, BACH2, PSMG1, GTF3C4, NASP, ASXL2, TPC1, CENPF, FUBP1, POLE3, CDK6, CDC5L, CHD3, NUP153, RAN, BEND3, C19ORF48, UBC, SSU72, MSH2, CDK12, ZBTB2, GLYR1, KMT2A, MCM3, GRWD1, H4C8, SNHG3, GATAD2A, DKC1, DDX1, H2BC12, CUL1, THUMP1, EWSR1, DDX49, CASC3, SSRP1, ARID1B, KPNB1, CPSF7, RRP1, TXNRD1, ATP6V0A1, HNRNPAB, KAT6A, USP36, RBBP4, SAFB, NCBP1, HEATR1, HSP90AB1, PA2G4, HNRNPK, SMG1, DHX37, PRPF19, SMARCA4, PRKDC, TRA2B, P </p> |
|--|--|--|-----------------------------------------------------------------------------------------------------------------------------------------------------------------------------------------------------------------------------------------------------------------------------------------------------------------------------------------------------------------------------------------------------------------------------------------------------------------------------------------------------------------------------------------------------------------------------------------------------------------------------------------------------------------------------------------------------------------------------------------------------------------------------------------------------------------------------------------------------------------------------------------------------------------------------------------------------------------------------------------------------------------------------------------------------------------------------------------------------------------------------------------------------------------------------------------------------------------------------------------------------------------------------------------------------------------------------------------------------------------------------------------------------------------------------------------------------------------------------------------------------------------------------------------------------------------------------------------------------------------------------------------------------------------------------------------------------------------------------------------------------------------------------------------------------------------------------------------------------------------------------------------------------------------------------------------------------------------------------------------------------------------------------------------------------------------------------------------------------------------------------------------------------------------------------------------------------------------------------------------------------------------------------------------------------------------------------------------------------------------------------------------------------------------------------------------------------------------------------------------------------------------------------------------------------------------------------------------------------------------------------------------------------------------------------------------------------------------------------------------------------------------------------------------------------------------------------------------------------------------------------------------------------------------------------------------------------------------------------------------------------------------------------------------------------------------------------------------------------------------------------------------------------------------------------------------------------------------------------------------------------------------------------------------------------------------------------------------------------------------------|

|            |                         |                        |                                                                                                                                                                                                                                                                                                                                                                                                                                                                                                                                                                                                                                                                                                                                                                                                                                                                                                                                                                                                                                                                                                                                                                                                                                                                                                                                                                                                                                                                                                                                                                                                                                                                                                                                                                                                                                                                                                                                                                                                                                                                                                                                                                                                                                                                                                                                                                                                                                                    |
|------------|-------------------------|------------------------|----------------------------------------------------------------------------------------------------------------------------------------------------------------------------------------------------------------------------------------------------------------------------------------------------------------------------------------------------------------------------------------------------------------------------------------------------------------------------------------------------------------------------------------------------------------------------------------------------------------------------------------------------------------------------------------------------------------------------------------------------------------------------------------------------------------------------------------------------------------------------------------------------------------------------------------------------------------------------------------------------------------------------------------------------------------------------------------------------------------------------------------------------------------------------------------------------------------------------------------------------------------------------------------------------------------------------------------------------------------------------------------------------------------------------------------------------------------------------------------------------------------------------------------------------------------------------------------------------------------------------------------------------------------------------------------------------------------------------------------------------------------------------------------------------------------------------------------------------------------------------------------------------------------------------------------------------------------------------------------------------------------------------------------------------------------------------------------------------------------------------------------------------------------------------------------------------------------------------------------------------------------------------------------------------------------------------------------------------------------------------------------------------------------------------------------------------|
|            |                         |                        | <p>RMT1, HNRNPC, MALT1, SF3A3, SUPT16H, HMGAI1, CELF1, XRCC5, DDX5, PSME3, UTP4, DEK, LMO2, LMNB1, DDX46, EIF4A3, NUP214, TRIP12, IPO7, SURF6, DDX39A, DDX56, CIZ1, CDT1, NOP56, HNRNPDL, KHDRBS1, HNRNPD, LRPPRC, CTDSP1, SUPT6H, RANBP2, DNAJB6, NOLC1, SNRNP200, SREBF2, CBFA2T3, ABCF1, DANCR, ACACA, MGA, NSUN2, AP5Z1, YBX1, LIN28B, RBM3, SF3A1, LMNB2, MPHOSPH10, PES1, ANP32B, IPO5, RREB1, HSPH1, EP300, DAZAP1, ALYREF, RRP1B, FOSB, PPM1G, STON2, SRRT, PRPF8, COA7, SF3B3, PTMA, THRAP3, MLLT1, HNRNPF, NPM1, RIF1, CITED2, SON, WDR43, RUNX1, TRIM28, U2AF2, NR2F2, BCLAF1, ECPAS, SRSF2, HSP90AA1, MDN1, NFATC3, ZNF521, TRMT1, MCM4, TRIM24, NOP58, HNRNPA2B1, SPN, BAG1, SQSTM1, PTBP1, CCAR1, DDX21, SFPQ, SCD, HNRNPM, POLR1A, SRSF3, ANKRD11, EIF3A, MCM7, SMARCC1, MYC, SET, BTG1, IGF2BP1, FOS, MYB, KHSRP, ZEB2, FUS, ILF3, ACTB, DHX9, HNRNPU, MCM5, NCL, EGR1, HSPA8</p>                                                                                                                                                                                                                                                                                                                                                                                                                                                                                                                                                                                                                                                                                                                                                                                                                                                                                                                                                                                                                                                                                                                                                                                                                                                                                                                                                                                                                                                                                                                                                  |
| GO:0031974 | membrane-enclosed lumen | 1.514657470535515e-106 | <p>HRAS, NOP14, CENPN, ACSF3, SNRNP, MITF, PPP6C, JMD1C, MIS18BP1, DAP3, RBM48, PPAN, MSH3, CHTOP, ERAL1, ZNF274, GYG1, KMT2B, AFF1, MMAB, SUPT7L, SREK1, MACROH2A1, BRD9, MED16, MUS81, NOL11, ITFG2, MTA2, SNHG6, RAD51C, MIX23, UTP3, CWC22, POLR3E, NEU1, DCAF7, MTREX, RIOX1, PHF5A, POLR1C, MED6, CBX3, PHB, METTL3, EZH2, TCF20, DCLRE1C, NOC4L, RFWD3, MFAP1, PAXIP1, GPATCH3, INTS6, PPP6R3, H4C5, NCAPH2, BRD4, TIMM17A, RRP9, MRPL1, SPIN4, ZNF74, MRPL11, AHCTF1, RPUSD4, MRPS30, CTDP1, MED1, NVL, POM121C, HNRNPL, NLN, MYO16, PWP1, WDR46, MC10, OXA1L, EFTUD2, CHRA1, CRCP, RANBP3, FRMD8, KMT2D, STAG2, CASP8, TAF4B, PSMA3, PQBP1, PSMD3, PSPC1, MAD2L2, MRRF, POLDIP2, PSMC3, NAA11, TIMM44, DHX38, NT5C3A, NOP16, ARID2, DDX23, PATZ1, TRNT1, RNPS1, ZNF512B, RBL1, PPP3R1, HIF1AN, USP11, SS18L1, RBM45, MED29, NOSIP, STAG1, HNRNPH1, LMD1, DNMT1, LYL1, PPP5C, BAP1, ANAPC7, SUB1, GTF2H1, DHX16, BUB3, TOP2B, LYAR, LRWD1, THOP1, CCNH, NAB2, KAT7, TPP2, EEF2, MSRA, AURKAIP1, SNHG20, WDR5, CCT8, TMEM43, FUBP3, IMP4, SNHG17, BCCIP, DLAT, NOB1, SBF1, RNF40, CUL3, ARPP19, CMPK1, NONO, MEF2C, TCF3, MAF1, GID8, CLSPN, NOL9, PLK4, PRPF6, ZC3H4, ZNF24, GRSF1, NXF1, UBQLN4, ACTR8, FAHD1, PSMC5, STK35, TIMM23, HNRNPA3, MAPK1, STAR, EEF1D, CASP3, POLR1E, PKP3, ABT1, PCLAF, WDR36, PDSS1, DHX33, CTR9, NCOA5, ZFP91, SDAD1, DHX15, UIMC1, PUM1, MTOR, DHX30, PDPR, RPRD2, UTP18, IKZF3, KANSL1, CPSF3, SPEN, GOT2, VDAC1, SMARCA5, CWC25, SF3A2, ZNF45, RSF1, TFAP4, NAA50, PRMT6, KPNA4, NIFK, FAF1, HNRNPA0, BAG6, EMD, ZNF131, TASOR2, MTDH, BAIAP2, HSPA9, MCCC1, TCF7L2, SRRM2, MRPL15, PRAME, ASCC3, UROD, SLC29A2, UBE2L3, THOC1, PSMC2, MCMBP, SETMAR, RPTOR, PPIL2, PPP1R10, MRPS35, HECTD1, CSTF2, GRPEL1, PPP4R3A, WDR33, NIP7, TRMT61A, NOL7, PDCD7, MED28, ELL2, HAT1, WDR3, SNRPA, BACH1, RBM10, CERT1, SETX, STK24, APEX1, BPTF, ED C4, ICE1, RIOK2, NAA15, ARID1A, NUP43, AMMECR1, SPECC1, PPP1CC, CAVIN2, ZC3H14, CDC27, HERC2, SRSF10, CTSL, AKAP8, SBDS, RCC1, C1QBP, VPS72, PPM1H, TICRR, MED15, EOGT, SRSF8, WDR74, PRPF4, KTN1, PRMT5, PCBP2, ADD1, TRMT6, RBMX, RNF126, BAZ1A, MCC2, MLLT3, RAD23B, VAT1, TAF4, RBM14, RBM8A, KDM3B, BOP1, GOLM1, SETD2, ZNF326, API5, INTS13, BTBD1, TUBB, FEN1, DYRK1A, TFDP2, WDR12, URB2, GTF3C6, SLBP, CUL4A, DNAJC8, JADE2, NUCKS1, SDCBP, PSM D1, UTP25, NUP50, PRPF38A, AGPAT5, GNL3L, DNTTIP2, IBA57, NSRP1, TFIP11, PSMB2, WAC, BRCA2, POLR2</p> |

|            |                               |                        |                                                                                                                                                                                                                                                                                                                                                                                                                                                                                                                                                                                                                                                                                                                                                                                                                                                                                                                                                                                                                                                                                                                                                                                                                                                                                                                                                                                                                                                                                                                                                                                                                                                                                                                                                                                                                                                                                                                                                                                                                                                                                                                                                                                                                                                                                                                                                             |
|------------|-------------------------------|------------------------|-------------------------------------------------------------------------------------------------------------------------------------------------------------------------------------------------------------------------------------------------------------------------------------------------------------------------------------------------------------------------------------------------------------------------------------------------------------------------------------------------------------------------------------------------------------------------------------------------------------------------------------------------------------------------------------------------------------------------------------------------------------------------------------------------------------------------------------------------------------------------------------------------------------------------------------------------------------------------------------------------------------------------------------------------------------------------------------------------------------------------------------------------------------------------------------------------------------------------------------------------------------------------------------------------------------------------------------------------------------------------------------------------------------------------------------------------------------------------------------------------------------------------------------------------------------------------------------------------------------------------------------------------------------------------------------------------------------------------------------------------------------------------------------------------------------------------------------------------------------------------------------------------------------------------------------------------------------------------------------------------------------------------------------------------------------------------------------------------------------------------------------------------------------------------------------------------------------------------------------------------------------------------------------------------------------------------------------------------------------|
|            |                               |                        | <p>D,WTAP,COPS2,NIN,RBM42,ZFX,ACLY,SNRPD1,PAF1,ZC3H18,FASTKD2,PHB2,TCOF1,XRCC2,PDS5A,BRCC3,SMARCB1,CREBBP,EXOSC3,WBP11,COPS3,NUP98,HNRNPUL1,LYN,ASH1L,LRRRC59,GEMIN5,APC,POLR1B,DDX42,CAPN1,ELOF1,NFYC,SF1,PELP1,XRN2,EZR,TRUB2,DDX20,DDX51,MMS19,ELOA,TAF9,ELAVL1,UTP15,VCP,WASHC5,RYBP,SAFB2,GBP2,PSIP1,CSTB,DCAF13,BEX4,RBM12,CDK4,DVL2,PNO1,POLR3C,MRPS2,RBM25,SETD1A,RRP12,WDR82,SMC1A,AGO2,E2F4,FOXRED2,PCM1,RNF220,TBC1D14,GNL2,SAE1,RRP36,MCM6,AQR,DDX18,IGF2R,UBA2,NFKB1,UBTF,ZNF622,BRD2,CHD7,RBM15B,USP37,HNRNPA1,GAR1,RRS1,PPARGC1B,MAGOH,PBRM1,CTCF,ANKRD17,HNRNPR,ELF1,NSD1,RSL1D1,CDK7,H3-3B,SETD1B,PPIF,PKM,FOKK2,KIF2A,HMGB1,MAEA,SMARCD1,CANX,YY1,NOL8,MLLT10,IRAK1,PIK3C2B,IP6K1,NAT10,TRMT10C,SNU13,SRSF6,EP400,SART1,MECP2,MBNL1,SKI,TKT,DDX54,TARDBP,XRCC6,PNN,PCNA,CDC25A,MBD1,CSNK2A2,DDX3X,HDGF,NCAPH,ZNF789,MCM2,JUND,CFL1,HCFC1,CHEK1,AATF,CLN6,ECSIT,PRMT7,OXCT1,SLC25A5,SLTM,URB1,POM121,CHAMP1,DNAJC21,UBP1,POLE,TRRAP,NUDC,EXOSC9,POLR2A,CCDC86,DNAJC7,SUMO3,NUP62,DYNC1H1,TSR1,RBM19,XPO1,PPIA,PRPF3,IK,SERPINI1,TPR,ENC1,SRSF7,UTP20,SF3B4,STK17A,PPRC1,EBNA1BP2,KEAP1,TFB2M,UBE2N,BAZ1B,NRIP1,MRT04,TLK1,TEX10,GFM1,MYBBP1A,DDB1,BACH2,PSMG1,GTFC34,NASP,ASXL2,TCP1,CENPF,FUBP1,POLR3,CDK6,CDC5L,CHD3,NUP153,RAN,BEND3,C19ORF48,UBC,TFAM,AK2,SSU72,MSH2,CDK12,ZBTB2,GLYR1,KMT2A,MCM3,GRWD1,H4C8,SNHG3,GATAD2A,DKC1,DDX1,H2BC12,CUL1,THUMPD1,EWSR1,DDX49,CASC3,SSRP1,ARID1B,KPNB1,CPSF7,RRP1,TXNRD1,ATP6V0A1,HNRNPAB,KAT6A,ATAD3A,USP36,RBBP4,SAFB,NCBP1,HEATR1,CCT2,HSP90AB1,PA2G4,HNRNPK,SMG1,DHX37,PRPF19,SMARCA4,PRKDC,TRA2B,PRMT1,HNRNPC,MALT1,SF3A3,SUPT16H,HMGA1,CELF1,XRCC5,DDX5,PSME3,UTP4,DEK,LMO2,LMNB1,DDX46,EIF4A3,NUP214,TRIP12,IPO7,SURF6,DDX39A,DDX56,CIZ1,CDT1,NOP56,HNRNPD,LKHDRBS1,HNRNPD,LRP,CTDSP1,SUPT6H,RANBP2,DNAJB6,NOLC1,SNRNP200,SREBF2,CBFA2T3,ABCF1,DANCR,ACACA,MGA,NSUN2,AP5Z1,HSPD1,YBX1,LIN28B,RBM3,SF3A1,LMNB2,MPHOSPH10,GDI2,PES1,ANP32B,IPO5,REB1,HSPH1,EP300,DAZAP1,ALYREF,RRP1B,FOSB,PPM1G,STON2,SRRT,PRPF8,COA7,SF3B3,PTMA,FTL,THRAP3,MLLT1,HNRNPF,NPM1,RIF1,CITED2,SON,WDR43,RUNX1,TRIM28,U2AF2,NR2F2,BCLAF1,ECPAS,SRSF2,HSP90AA1,MDN1,NFATC3,ZNF521,TRMT1,MCM4,TRIM24,NOP58,HNRNPA2B1,SPN,BAG1,SQSTM1,PTBP1,CCAR1,DDX21,SFPQ,SCD,HNRNPM,POLR1A,SRSF3,ANKRD11,EIF3A,MCM7,SMARCC1,MYC,SET,VGF,BTG1,IGF2BP1,FOS,MYB,KHSRP,ZEB2,FUS,ILF3,ACTB,DHX9,HNRNPU,MCM5,NCL,EGR1,HSPA8,FTH1</p> |
| GO:0070013 | intracellular organelle lumen | 1.514657470535515e-106 | <p>HRAS,NOP14,CENPN,ACSF3,SNRPB,MITF,PPP6C,JMJD1C,MIS18BP1,DAP3,RBM48,PPAN,MSH3,CHTOP,ERL1,ZNF274,GYG1,KMT2B,AFF1,MMAB,SUPT7L,SEK1,MACROH2A1,BRD9,MED16,MUS81,NOL11,ITFG2,MTA2,SNHG6,RAD51C,MIX23,UTP3,CWC22,POLR3E,NEU1,DCAF7,MTREX,RIOX1,PHF5A,POLR1C,MED6,CBX3,PHB,METTL3,EZH2,TCF20,DCLRE1C,NOC4L,RWD3,MFAP1,PAXIP1,GPATCH3,INTS6,PPP6R3,H4C5,NCAPH2,BRD4,TIMM17A,RRP9,MRPL1,SPIN4,ZNF74,MRPL11,AHCTF1,RPUSD4,MRPS30,CTDP1,MED1,NVL,POM121C,HNRNPL,NLN,MYO16,PWP1,WDR46,MC</p>                                                                                                                                                                                                                                                                                                                                                                                                                                                                                                                                                                                                                                                                                                                                                                                                                                                                                                                                                                                                                                                                                                                                                                                                                                                                                                                                                                                                                                                                                                                                                                                                                                                                                                                                                                                                                                                                          |

|  |  |  |                                                                                                                                                                                                                                                                                                                                                                                                                                                                                                                                                                                                                                                                                                                                                                                                                                                                                                                                                                                                                                                                                                                                                                                                                                                                                                                                                                                                                                                                                                                                                                                                                                                                                                                                                                                                                                                                                                                                                                                                                                                                                                                                                                                                                                                                                                                                                                                                                                                                                                                                                                                                                                                                                                                                                                                                                                                                                                                                                                                                                                                                                                                                                                                                                                                                                                                                                                  |
|--|--|--|------------------------------------------------------------------------------------------------------------------------------------------------------------------------------------------------------------------------------------------------------------------------------------------------------------------------------------------------------------------------------------------------------------------------------------------------------------------------------------------------------------------------------------------------------------------------------------------------------------------------------------------------------------------------------------------------------------------------------------------------------------------------------------------------------------------------------------------------------------------------------------------------------------------------------------------------------------------------------------------------------------------------------------------------------------------------------------------------------------------------------------------------------------------------------------------------------------------------------------------------------------------------------------------------------------------------------------------------------------------------------------------------------------------------------------------------------------------------------------------------------------------------------------------------------------------------------------------------------------------------------------------------------------------------------------------------------------------------------------------------------------------------------------------------------------------------------------------------------------------------------------------------------------------------------------------------------------------------------------------------------------------------------------------------------------------------------------------------------------------------------------------------------------------------------------------------------------------------------------------------------------------------------------------------------------------------------------------------------------------------------------------------------------------------------------------------------------------------------------------------------------------------------------------------------------------------------------------------------------------------------------------------------------------------------------------------------------------------------------------------------------------------------------------------------------------------------------------------------------------------------------------------------------------------------------------------------------------------------------------------------------------------------------------------------------------------------------------------------------------------------------------------------------------------------------------------------------------------------------------------------------------------------------------------------------------------------------------------------------------|
|  |  |  | <p> M10, OXA1L, EFTUD2, CHAC1, CRCP, RANBP3, FRMD8, KMT2D, STAG2, CASP8, TAF4B, PSMA3, PQBP1, PSMD3, PSFC1, MAD2L2, MRRF, POLDIP2, PSMC3, NAA11, TIMM44, DHX38, NT5C3A, NOP16, ARID2, DDX23, PATZ1, TRNT1, RNPS1, ZNF512B, RBL1, PPP3R1, HIF1AN, USP11, SS18L1, RBM45, MED29, NOSIP, STAG1, HNRNP1, LMD1, DNMT1, LYL1, PPP5C, BAP1, ANAPC7, SUB1, GTF2H1, DHX16, BUB3, TOP2B, LYAR, LRWD1, THOP1, CCNH, NAB2, KAT7, TPP2, EEF2, MSRA, AURKAIP1, SNHG20, WDR5, CCT8, TMEM43, FUBP3, IMP4, SNHG17, BCCIP, DLAT, NOB1, SBF1, RNF40, CUL3, ARPP19, CMPK1, NONO, MEF2C, TCF3, MAF1, GID8, CLSPN, NOL9, PLK4, PRPF6, ZC3H4, ZNF24, GRSF1, NXF1, UBQLN4, ACTR8, FAHD1, PSMC5, STK35, TIMM23, HNRNPA3, MAPK1, STAR, EEF1D, CASP3, POLR1E, PKP3, ABT1, PCLAF, WDR36, PDSS1, DHX33, CTR9, NCOA5, ZFP91, SDAD1, DHX15, UIMC1, PUM1, MTOR, DHX30, PDPR, RPRD2, UTP18, IKZF3, KANSL1, CPSF3, SPEN, GOT2, VDAC1, SMARCA5, CWC25, SF3A2, ZNF45, RSF1, TFAP4, NAA50, PRMT6, KPNAA4, NIFK, FAF1, HNRNPA0, BAG6, EMD, ZNF131, TASOR2, MTDH, BAIAP2, HSPA9, MCCC1, TCF7L2, SRRM2, MRPL15, PRAME, ASCC3, UROD, SLC29A2, UBE2L3, THOC1, PSMC2, MCMBP, SETMAR, RPTOR, PPIL2, PPP1R10, MRPS35, HECTD1, CSTF2, GRPEL1, PPP4R3A, WDR33, NIP7, TRMT61A, NOL7, PDCD7, MED28, ELL2, HAT1, WDR3, SNRPA, BACH1, RBM10, CERT1, SETX, STK24, APEX1, BPTF, EDC4, ICE1, RIOK2, NAA15, ARID1A, NUP43, AMMECR1, SPECC1, PPP1CC, CAVIN2, ZC3H14, CDC27, HERC2, SRSF10, CTSL, AKAP8, SBDS, RCC1, C1QBP, VPS72, PPM1H, TICRR, MED15, EOGT, SRSF8, WDR74, PRPF4, KTN1, PRMT5, PCBP2, ADD1, TRMT6, RBMX, RNF126, BAZ1A, MCC2, MLLT3, RAD23B, VAT1, TAF4, RBM14, RBM8A, KDM3B, BOP1, GOLM1, SETD2, ZNF326, API5, INTS13, BTBD1, TUBB, FEN1, DYRK1A, TFDP2, WDR12, URB2, GTF3C6, SLBP, CUL4A, DNAJC8, JADE2, NUCKS1, SDCBP, PSM1, UTP25, NUP50, PRPF38A, AGPAT5, GNL3L, DNTTIP2, IBA57, NSRP1, TFIP11, PSMB2, WAC, BRCA2, POLR2D, WTAP, COPS2, NIN, RBM42, ZFX, ACLY, SNRPD1, PAF1, ZC3H18, FASTKD2, PHB2, TCOF1, XRCC2, PDS5A, BRCC3, SMARCB1, CREBBP, EXOSC3, WBP11, COPS3, NUP98, HNRNPUL1, LYN, ASH1L, LRRC59, GEMIN5, APC, POLR1B, DDX42, CAPN1, ELOF1, NFYC, SF1, PELP1, XRN2, EZR, TRUB2, DDX20, DDX51, MMS19, ELOA, TAF9, ELAVL1, UTP15, VCP, WASHC5, RYBP, SAFB2, GBP2, PSIP1, CSTB, DCAF13, BEX4, RBM12, CDK4, DVL2, PNO1, POLR3C, MRPS2, RBM25, SETD1A, RRP12, WDR82, SMC1A, AGO2, E2F4, FOXRED2, PCM1, RNF220, TBC1D14, GNL2, SAE1, RRP36, MCM6, AQR, DDX18, IGF2R, UBA2, NFKB1, UBTf, ZNF622, BRD2, CHD7, RBM15B, USP37, HNRNPA1, GAR1, RRS1, PPARGC1B, MAGOH, PBRM1, CTCF, ANKRD17, HNRNPR, ELF1, NSD1, RSL1D1, CDK7, H3-3B, SETD1B, PPIF, PKM, FOXK2, KIF2A, HMGB1, MAEA, SMARCD1, CANX, YY1, NOL8, MLLT10, IRAK1, PIK3C2B, IP6K1, NAT10, TRMT10C, SNU13, SRSF6, EP400, SART1, MECF2, MBNL1, SKI, TKT, DDX54, TARDBP, XRCC6, PNN, PCNA, CDC25A, MBD1, CSNK2A2, DDX3X, HDGF, NCAPH, ZNF789, MCM2, JUND, CFL1, HCFC1, CHEK1, AATF, CLN6, ECSIT, PRMT7, OXCT1, SLC25A5, SLTM, URB1, POM121, CHAMP1, DNAJC21, UBP1, POLE, TRRAP, NUDC, EXOSC9, POLR2A, CCDC86, DNAJC7, SUMO3, NUP62, DYNC1H1, TSR1, RBM19, XPO1, PPIA, PRPF3, IK, SERPINE1, TPR, ENC1, SRSF7, UTP20, SF3B4, STK17A, PPRC1, EBNA1BP2, KEAP1, TFB2M, UBE2N, BAZ1B, NRIP1, MTO4, TLK1, TEX10, GFM1, MYBBP1A, DDB1, BACH2, PSMG1, GTF3C4, NASP, ASXL2, TCP1, CENPF, FUBP1, POLR3, CDK6, CDC5L, CHD3, NUP153, RAN, BEND3, C19ORF </p> |
|--|--|--|------------------------------------------------------------------------------------------------------------------------------------------------------------------------------------------------------------------------------------------------------------------------------------------------------------------------------------------------------------------------------------------------------------------------------------------------------------------------------------------------------------------------------------------------------------------------------------------------------------------------------------------------------------------------------------------------------------------------------------------------------------------------------------------------------------------------------------------------------------------------------------------------------------------------------------------------------------------------------------------------------------------------------------------------------------------------------------------------------------------------------------------------------------------------------------------------------------------------------------------------------------------------------------------------------------------------------------------------------------------------------------------------------------------------------------------------------------------------------------------------------------------------------------------------------------------------------------------------------------------------------------------------------------------------------------------------------------------------------------------------------------------------------------------------------------------------------------------------------------------------------------------------------------------------------------------------------------------------------------------------------------------------------------------------------------------------------------------------------------------------------------------------------------------------------------------------------------------------------------------------------------------------------------------------------------------------------------------------------------------------------------------------------------------------------------------------------------------------------------------------------------------------------------------------------------------------------------------------------------------------------------------------------------------------------------------------------------------------------------------------------------------------------------------------------------------------------------------------------------------------------------------------------------------------------------------------------------------------------------------------------------------------------------------------------------------------------------------------------------------------------------------------------------------------------------------------------------------------------------------------------------------------------------------------------------------------------------------------------------------|

|            |                 |                        |                                                                                                                                                                                                                                                                                                                                                                                                                                                                                                                                                                                                                                                                                                                                                                                                                                                                                                                                                                                                                                                                                                                                                                                                                                                                                                                                                                                                                                                                                                                                                                                                                                                                                                                                                         |
|------------|-----------------|------------------------|---------------------------------------------------------------------------------------------------------------------------------------------------------------------------------------------------------------------------------------------------------------------------------------------------------------------------------------------------------------------------------------------------------------------------------------------------------------------------------------------------------------------------------------------------------------------------------------------------------------------------------------------------------------------------------------------------------------------------------------------------------------------------------------------------------------------------------------------------------------------------------------------------------------------------------------------------------------------------------------------------------------------------------------------------------------------------------------------------------------------------------------------------------------------------------------------------------------------------------------------------------------------------------------------------------------------------------------------------------------------------------------------------------------------------------------------------------------------------------------------------------------------------------------------------------------------------------------------------------------------------------------------------------------------------------------------------------------------------------------------------------|
|            |                 |                        | <p>48,UBC,TFAM,AK2,SSU72,MSH2,CDK12,ZBTB2,GLYR1,KMT2A,MCM3,GRWD1,H4C8,SNHG3,GATAD2A,DKC1,DDX1,H2BC12,CUL1,THUMPDI,EWSR1,DDX49,CASC3,SSRP1,ARID1B,KPNB1,CPSF7,RRP1,TXNRD1,ATP6V0A1,HNRNPAB,KAT6A,ATAD3A,USP36,RBBP4,SAFB,NCBP1,HEATR1,CCT2,HSP90AB1,PA2G4,HNRNPK,SMG1,DHX37,PRPF19,SMARCA4,PRKDC,TRA2B,PRMT1,HNRNPC,MALT1,SF3A3,SUPT16H,HMGA1,CELF1,XRCC5,DDX5,PSME3,UTP4,DEK,LMO2,LMNB1,DDX46,EIF4A3,NUP214,TRIP12,IPO7,SURF6,DDX39A,DDX56,CIZ1,CDT1,NOP56,HNRNPDL,KHDRBS1,HNRNPD,LRPPTC,CTDSP1,SUPT6H,RANBP2,DNAJB6,NOLC1,SNRNP200,SREBF2,CBFA2T3,ABCF1,DANCR,ACACA,MGA,NSUN2,AP5Z1,HSPD1,YBX1,LIN28B,RBM3,SF3A1,LMNB2,MPHOSPH10,GDI2,PES1,ANP32B,IPO5,REB1,HSPH1,EP300,DAZAP1,ALYREF,RRP1B,FOSB,PPM1G,STON2,SRRT,PRPF8,COA7,SF3B3,PTMA,FTL,THRAP3,MLLT1,HNRNPF,NPM1,RIF1,CITED2,SON,WDR43,RUNX1,TRIM28,U2AF2,NR2F2,BCLAF1,ECPAS,SRSF2,HSP90AA1,MDN1,NFATC3,ZNF521,TRMT1,MCM4,TRIM24,NOP58,HNRNPA2B1,SPN,BAG1,SQSTM1,PTBP1,CCAR1,DDX21,SFPQ,SCD,HNRNPM,POLR1A,SRSF3,ANKRD11,EIF3A,MCM7,SMARCC1,MYC,SET,VGF,BTG1,IGF2BP1,FOS,MYB,KHSRP,ZEB2,FUS,ILF3,ACTB,DHX9,HNRNPU,MCM5,NCL,EGR1,HSPA8,FTH1</p>                                                                                                                                                                                                                                                                                                                                                                                                                                                                                                                                                                                                                                                      |
| GO:0043233 | organelle lumen | 1.514657470535515e-106 | <p>HRAS,NOP14,CENPN,ACSF3,SNRBP,MITF,PPP6C,JMJD1C,MIS18BP1,DAP3,RBM48,PPAN,MSH3,CHTOP,EAL1,ZNF274,GYG1,KMT2B,AFF1,MMAB,SUPT7L,SREK1,MACROH2A1,BRD9,MED16,MUS81,NOL11,ITFG2,MTA2,SNHG6,RAD51C,MIX23,UTP3,CWC22,POLR3E,NEU1,DCAF7,MTREX,RIOX1,PHF5A,POLR1C,MED6,CBX3,PHB,METTL3,EZH2,TCF20,DCLRE1C,NOC4L,RFWD3,MFAP1,PAXIP1,GPATCH3,INTS6,PPP6R3,H4C5,NCAPH2,BRD4,TIMM17A,RRP9,MRPL1,SPIN4,ZNF74,MRPL11,AHCTF1,RPUSD4,MRPS30,CTDP1,MED1,NVL,POM121C,HNRNPL,NLN,MYO16,PWP1,WDR46,MC M10,OXA1L,EFTUD2,CHRA1,CRCP,RANBP3,FRMD8,KMT2D,STAG2,CASP8,TAF4B,PSMA3,PQBP1,PSMD3,PSPC1,MAD2L2,MRRF,POLDIP2,PSMC3,NAA11,TIMM44,DHX38,NT5C3A,NOP16,ARID2,DDX23,PATZ1,TRNT1,RNPS1,ZNF512B,RBL1,PPP3R1,HIF1AN,USP11,SS18L1,RBM45,MED29,NOSIP,STAG1,HNRNPH1,LIMD1,DNMT1,LYL1,PPP5C,BAP1,ANAPC7,SUB1,GTTF2H1,DHX16,BUB3,TOP2B,LYAR,LRWD1,THOP1,CCNH,NAB2,KAT7,TPP2,EEF2,MSRA,AURKAIP1,SNHG20,WDR5,CCT8,TMEM43,FUBP3,IMP4,SNHG17,BCCIP,DLAT,NOB1,SBF1,RNF40,CUL3,ARPP19,CMPK1,NONO,MEF2C,TCF3,MAF1,GID8,CLSPN,NOL9,PLK4,PRPF6,ZC3H4,ZNF24,GRSF1,NXF1,UBQLN4,ACTR8,FAHD1,PSMC5,STK35,TIMM23,HNRNPA3,MAPK1,STAR,EEF1D,CASP3,POLR1E,PKP3,ABT1,PCLAF,WDR36,PDSS1,DHX33,CTR9,NCOA5,ZFP91,SDAD1,DHX15,UIMC1,PUM1,MTOR,DHX30,PDPR,RPRD2,UTP18,IKZF3,KANSL1,CPSF3,SPEN,GOT2,VDAC1,SMARCA5,CWC25,SF3A2,ZNF45,RSF1,TFAP4,NAA50,PRMT6,KPNA4,NIFK,FAF1,HNRNPA0,BAG6,EMD,ZNF131,TASOR2,MTDH,BAIAP2,HSPA9,MCCC1,TCF7L2,SRRM2,MRPL15,PRAME,ASCC3,UROD,SLC29A2,UBE2L3,THOC1,PSMC2,MCMBP,SETMAR,RPTOR,PPIL2,PPP1R10,MRPS35,HECTD1,CSTF2,GRPEL1,PPP4R3A,WDR33,NIP7,TRMT61A,NOL7,PDCC7,MED28,ELL2,HAT1,WDR3,SNRPA,BACH1,RBM10,CERT1,SETX,STK24,APEX1,BPTF,EDC4,ICE1,RIOK2,NAA15,ARID1A,NUP43,ANMECR1,SPGCC1,PPP1CC,CAVIN2,ZC3H14,CDC27,HERC2,SRSF10,CTSL,AKAP8,SBDS,RCC1,C1QBP,VPS72,PPM1H</p> |

|            |         |                           |                                                                                                                                                                                                                                                                                                                                                                                                                                                                                                                                                                                                                                                                                                                                                                                                                                                                                                                                                                                                                                                                                                                                                                                                                                                                                                                                                                                                                                                                                                                                                                                                                                                                                                                                                                                                                                                                                                                                                                                                                                                                                                                                                                                                                                                                                                                                                                                                                                                                                                                                                                                                                                                                                                                                                                             |
|------------|---------|---------------------------|-----------------------------------------------------------------------------------------------------------------------------------------------------------------------------------------------------------------------------------------------------------------------------------------------------------------------------------------------------------------------------------------------------------------------------------------------------------------------------------------------------------------------------------------------------------------------------------------------------------------------------------------------------------------------------------------------------------------------------------------------------------------------------------------------------------------------------------------------------------------------------------------------------------------------------------------------------------------------------------------------------------------------------------------------------------------------------------------------------------------------------------------------------------------------------------------------------------------------------------------------------------------------------------------------------------------------------------------------------------------------------------------------------------------------------------------------------------------------------------------------------------------------------------------------------------------------------------------------------------------------------------------------------------------------------------------------------------------------------------------------------------------------------------------------------------------------------------------------------------------------------------------------------------------------------------------------------------------------------------------------------------------------------------------------------------------------------------------------------------------------------------------------------------------------------------------------------------------------------------------------------------------------------------------------------------------------------------------------------------------------------------------------------------------------------------------------------------------------------------------------------------------------------------------------------------------------------------------------------------------------------------------------------------------------------------------------------------------------------------------------------------------------------|
|            |         |                           | <p>,TICRR,MED15,EOGT,SRSF8,WDR74,PRPF4,KTN1,PRMT5,PCBP2,ADD1,TRMT6,RBMX,RNF126,BAZ1A,MC CC2,MLLT3,RAD23B,VAT1,TAF4,RBM14,RBM8A,KDM 3B,BOP1,GOLM1,SETD2,ZNF326,API5,INTS13,BTB D1,TUBB,FEN1,DYRK1A,TFDP2,WDR12,URB2,ETF3C 6,SLBP,CUL4A,DNAJC8,JADE2,NUCKS1,SDCBP,PSM D1,UTP25,NUP50,PRPF38A,AGPAT5,GNL3L,DNTTIP 2,IBA57,NSRP1,TFIP11,PSMB2,WAC,BRCA2,POLR2 D,WTAP,COPS2,NIN,RBM42,ZFX,ACLY,SNRPD1,PAF 1,ZC3H18,FASTKD2,PHB2,TCOF1,XRCC2,PDS5A,BR CC3,SMARCB1,CREBBP,EXOSC3,WBP11,COPS3,NUP9 8,HNRNPUL1,LYN,ASH1L,LRR59,GEMIN5,APC,POL R1B,DDX42,CAPN1,ELOF1,NFYC,SF1,PELP1,XRN2, EZR,TRUB2,DDX20,DDX51,MMS19,ELOA,TAF9,ELAV L1,UTP15,VCP,WASHC5,RYBP,SAFB2,GBP2,PSIP1, CSTB,DCAF13,BEX4,RBM12,CDK4,DVL2,PNO1,POLR 3C,MRPS2,RBM25,SETD1A,RRP12,WDR82,SMC1A,AG O2,E2F4,FOXRED2,PCM1,RNF220,TBC1D14,GNL2,S AE1,RRP36,MCM6,AQR,DDX18,IGF2R,UBA2,NFKB1, UBTf,ZNF622,BRD2,CHD7,RBM15B,USP37,HNRNPA1 ,GAR1,RRS1,PPARGC1B,MAGOH,PBRM1,CTCF,ANKRD 17,HNRNPR,ELF1,NSD1,RSL1D1,CDK7,H3- 3B,SETD1B,PPIF,PKM,FOXK2,KIF2A,HMGB1,MAEA, SMARCD1,CANX,YY1,NOL8,MLLT10,IRAK1,PIK3C2B ,IP6K1,NAT10,TRMT10C,SNU13,SRSF6,EP400,SAR T1,MECP2,MBNL1,SKI,TKT,DDX54,TARDBP,XRCC6, PNN,PCNA,CDC25A,MBD1,CSNK2A2,DDX3X,HDGF,NC APH,ZNF789,MCM2,JUND,CFL1,HCFC1,CHEK1,AATF ,CLN6,ECSIT,PRMT7,OXCT1,SLC25A5,SLTM,URB1, POM121,CHAMP1,DNAJC21,UBP1,POLE,TRRAP,NUDC ,EXOSC9,POLR2A,CCDC86,DNAJC7,SUMO3,NUP62,D YNC1H1,TSR1,RBM19,XPO1,PPIA,PRPF3,IK,SERPI NE1,TPR,ENC1,SRSF7,UTP20,SF3B4,STK17A,PPRC 1,EBNA1BP2,KEAP1,TFB2M,UBE2N,BAZ1B,NRIP1,M RTO4,TLK1,TEX10,GFM1,MYBBP1A,DDB1,BACH2,PS MG1,ETF3C4,NASP,ASXL2,TCP1,CENPF,FUBP1,POL E3,CDK6,CDC5L,CHD3,NUP153,RAN,BEND3,C19ORF 48,UBC,TFAM,AK2,SSU72,MSH2,CDK12,ZBTB2,GLY R1,KMT2A,MCM3,GRWD1,H4C8,SNHG3,GATAD2A,DKC 1,DDX1,H2BC12,CUL1,THUMPDI,EWSR1,DDX49,CAS C3,SSRP1,ARID1B,KPNB1,CPSF7,RRP1,TXNRD1,AT P6V0A1,HNRNPAB,KAT6A,ATAD3A,USP36,RBBP4,SA FB,NCBP1,HEATR1,CCT2,HSP90AB1,PA2G4,HNRNPK ,SMG1,DHX37,PRPF19,SMARCA4,PRKDC,TRA2B,PRM T1,HNRNPC,MALT1,SF3A3,SUPT16H,HMGA1,CELFL1, XRCC5,DDX5,PSME3,UTP4,DEK,LMO2,LMNB1,DDX46 ,EIF4A3,NUP214,TRIP12,IPO7,SURF6,DDX39A,DD X56,CIZ1,CDT1,NOP56,HNRNPDL,KHDRBS1,HNRNPD ,LRPPRC,CTDSP1,SUPT6H,RANBP2,DNAJB6,NOLC1, SNRNP200,SREBF2,CBFA2T3,ABCF1,DANCR,ACACA, MGA,NSUN2,AP5Z1,HSPD1,YBX1,LIN28B,RBM3,SF3 A1,LMNB2,MPHOSPH10,GDI2,PES1,ANP32B,IPO5,R REB1,HSPH1,EP300,DAZAP1,ALYREF,RRP1B,FOSB, PPM1G,STON2,SRRT,PRPF8,COA7,SF3B3,PTMA,FTL ,THRAP3,MLLT1,HNRNPF,NPM1,RIF1,CITED2,SON, WDR43,RUNX1,TRIM28,U2AF2,NR2F2,BCLAF1,ECPA S,SRSF2,HSP90AA1,MDN1,NFATC3,ZNF521,TRMT1, MCM4,TRIM24,NOP58,HNRNPA2B1,SPN,BAG1,SQSTM 1,PTBP1,CCAR1,DDX21,SFPQ,SCD,HNRNPM,POLR1A ,SRSF3,ANKRD11,EIF3A,MCM7,SMARCC1,MYC,SET, VGF,BTG1,IGF2BP1,FOS,MYB,KHSRP,ZEB2,FUS,IL F3,ACTB,DHX9,HNRNPU,MCM5,NCL,EGR1,HSPA8,FT H1</p> |
| GO:0005634 | nucleus | 3.816971580<br>108217e-70 | <p>HRAS,NOP14,CENPN,TXK,ACSF3,SNRPB,MTTF,PPP6 C,JMJD1C,MIS18BP1,DAP3,RBM48,PPAN,MSH3,TRI P13,CHTOP,ZNF274,ABRAXAS2,PRPF38B,KMT2B,AF</p>                                                                                                                                                                                                                                                                                                                                                                                                                                                                                                                                                                                                                                                                                                                                                                                                                                                                                                                                                                                                                                                                                                                                                                                                                                                                                                                                                                                                                                                                                                                                                                                                                                                                                                                                                                                                                                                                                                                                                                                                                                                                                                                                                                                                                                                                                                                                                                                                                                                                                                                                                                                                                                     |



|  |  |  |                                                                                                                                                                                                                                                                                                                                                                                                                                                                                                                                                                                                                                                                                                                                                                                                                                                                                                                                                                                                                                                                                                                                                                                                                                                                                                                                                                                                                                                                                                                                                                                                                                                                                                                                                                                                                                                                                                                                                                                                                                                                                                                                                                                                                                                                                                                                                                                                                                                                                                                                                                                                                                                                                                                                                                                                                                                                                 |
|--|--|--|---------------------------------------------------------------------------------------------------------------------------------------------------------------------------------------------------------------------------------------------------------------------------------------------------------------------------------------------------------------------------------------------------------------------------------------------------------------------------------------------------------------------------------------------------------------------------------------------------------------------------------------------------------------------------------------------------------------------------------------------------------------------------------------------------------------------------------------------------------------------------------------------------------------------------------------------------------------------------------------------------------------------------------------------------------------------------------------------------------------------------------------------------------------------------------------------------------------------------------------------------------------------------------------------------------------------------------------------------------------------------------------------------------------------------------------------------------------------------------------------------------------------------------------------------------------------------------------------------------------------------------------------------------------------------------------------------------------------------------------------------------------------------------------------------------------------------------------------------------------------------------------------------------------------------------------------------------------------------------------------------------------------------------------------------------------------------------------------------------------------------------------------------------------------------------------------------------------------------------------------------------------------------------------------------------------------------------------------------------------------------------------------------------------------------------------------------------------------------------------------------------------------------------------------------------------------------------------------------------------------------------------------------------------------------------------------------------------------------------------------------------------------------------------------------------------------------------------------------------------------------------|
|  |  |  | <p> F1,SUPT7L,SREK1,MACROH2A1,BRD9,MED16,MUS81,NOL11,ITFG2,BICRA,MTA2,SNHG6,RAD51C,UTP3,CWC22,CPNE7,POLR3E,UBE2Q1,DCAF7,MTREX,RIOX1,PHF5A,NACA,POLR1C,MED6,TRIM35,CBX3,PHB,METTL3,EZH2,TCF20,DCLRE1C,NOC4L,RFWD3,MFAP1,PAXIP1,LRRFIP1,GPATCH3,RHEB,INTS6,PPP6R3,H4C5,NCAPH2,SMG5,IFRD2,BRD4,TIMM17A,RRP9,ZNF581,SPIN4,ZNF74,AHCTF1,RPUSD4,CHCHD3,RNASEH2C,HROB,CTDP1,NUP155,MED1,NVL,POM121C,HNRNPL,MYO16,PWP1,WDR46,MCM10,EFTUD2,CHAC1,CRCP,RANBP3,FRMD8,KMT2D,STAG2,CASP8,TAF4B,PSMA3,PQBP1,PSMD3,AIFM2,PSPC1,CEP350,MAD2L2,POLDIP2,PSMC3,ZBTB40,NAA11,TIMM44,DHX38,ADNP2,NT5C3A,NOP16,ARID2,DDX23,PATZ1,TRNT1,MNS1,RNPS1,MTCH2,LHX4,ZNF512B,RBL1,PPP3R1,HIF1AN,USP11,SS18L1,RBM45,MED29,NOSIP,PAFAH1B1,STAG1,HNRNPH1,LIMD1,ZNF512,DNMT1,LYL1,NAA20,PPP5C,BAP1,JRK,ANAPC7,SUB1,GTTF2H1,DHX16,BUB3,TOP2B,LYAR,LRWD1,CCNH,NAB2,KAT7,TPP2,EEF2,MSRA,AURKAIP1,SNHG20,WDR5,CCT8,TMEM43,FUBP3,IMP4,SNHG17,BCCIP,SPRY2,FAM120A,NOB1,SBF1,RNF40,CUL3,ARPP19,CMPK1,NONO,MEF2C,TCF3,NUP160,TEX15,MAF1,GID8,CLSPN,NOL9,PLK4,CCNY,PRPF6,ZC3H4,TMEM33,PEBP1,ZNF26,ZNF24,GRSF1,NXF1,UBQLN4,ACTR8,FAHD1,PSMC5,AGPAT3,STK35,ZC3HAV1,HNRNPA3,MAPK1,EEF1D,CASP3,POLR1E,IPO9,PKP3,ABT1,SURF4,PCLAF,WDR36,CERS2,DHX33,STRIP1,CTR9,NCOA5,ZFP91,SDAD1,DHX15,UIMC1,PUM1,NEMP1,MTOR,RPRD2,UTP18,IKZF3,KANSL1,CPSF3,SPEN,VDAC1,SMARCA5,CWC25,SF3A2,H2AW,ZNF45,RSF1,TFAP4,NAA50,PTP4A2,PRMT6,TSPYL5,KPNA4,NIFK,FAF1,HNRNPA0,BAG6,EMD,ZNF131,PCYT1A,SBNO1,TASOR2,ZNF431,NAP1L4,MTDH,BAIAP2,COMMD4,HSPA9,TCF7L2,ZNF239,SRRM2,PRAME,ASCC3,UROD,SLC29A2,UBE2L3,THOC1,PSMC2,MCMBP,SETMAR,RPTOR,PPLI2,PPP1R10,HECTD1,TMEM18,CSTF2,RAVER1,GRPEL1,PPP4R3A,SAMSN1,WDR33,NIP7,PPP2R5A,TRMT61A,IGF2BP3,NOL7,PDCD7,MED28,ELL2,PUM2,H2AZ2,HAT1,MCRIP2,WDR3,SSBP3,SNRPA,ZNF586,BACH1,DDX10,RBM10,CERT1,SETX,NFILZ,PSMG2,STK24,METTL8,APEX1,BPTF,EDC4,ICE1,RIOK2,NAA15,ARID1A,NUP43,AMMECR1,PITHD1,SPECC1,PPP1CC,CAVIN2,ZC3H14,CDC27,HERC2,SRSF10,CTSL,AKAP8,SBDS,RCC1,C1QBP,VPS72,PPM1H,ZNF587B,CRK,TICRR,MED15,SRSF8,WDR74,PAK2,PRPF4,PRMT5,PCBP2,ADD1,TRMT6,RBMX,RNF126,BAZ1A,GPX4,YJU2,WDR70,MLLT3,RAD23B,TAF4,RBM14,RBM8A,KDM3B,BOP1,SETD2,ZNF326,API5,INTS13,BTBD1,TUBB,FEN1,CHAF1A,ZNF282,DYRK1A,PHF3,TFDP2,WDR12,URB2,GTTF3C6,SLBP,CUL4A,DNAJC8,JADE2,NUCKS1,SDCBP,PSMD1,UTP25,TMPO,NUP188,NUP50,PRPF38A,SSB,AGPAT5,GNL3L,DNTTIP2,RNU6-322P,NSRP1,TFIP11,KCTD15,STRBP,PSMB2,WAC,ADI1,BSN,BRCA2,RANBP1,POLR2D,WTAP,COPS2,NIN,BCL7B,RBM42,ZFX,ZC3H7B,ACLY,SNRPD1,MED13L,PAF1,ZC3H18,BIRC6,RABL6,PHB2,TCOF1,LRRC41,RAP1GAP2,XRCC2,PDS5A,BRCC3,ZNF75A,SMARCB1,CREBBP,EXOSC3,WBP11,COPS3,UBE4B,NUP98,HNRNPUL1,CNOT1,LYN,ASH1L,LRRC59,GEMIN5,PLAGL2,APC,BTF3,POLR1B,JPT2,DDX42,ELOF1,WDR6,NFYC,SF1,PELP1,XRN2,TMEM201,EZR,DDX20,URM1,DDX51,MMS19,ELOA,TAF9,ELAVL1,UTP15,VCP,DNAJB12,WASHC5,RYBP,SAFB2,GBP2,PSIP1,CSTB,CSNK1G2,DCAF13,BEX4,RBM12,STIP1,CDK4,DVL2,PNO1,POLR3C,RBM25,SETD1A,RRP12,WDR82,SMC1A,AGO2 </p> |
|--|--|--|---------------------------------------------------------------------------------------------------------------------------------------------------------------------------------------------------------------------------------------------------------------------------------------------------------------------------------------------------------------------------------------------------------------------------------------------------------------------------------------------------------------------------------------------------------------------------------------------------------------------------------------------------------------------------------------------------------------------------------------------------------------------------------------------------------------------------------------------------------------------------------------------------------------------------------------------------------------------------------------------------------------------------------------------------------------------------------------------------------------------------------------------------------------------------------------------------------------------------------------------------------------------------------------------------------------------------------------------------------------------------------------------------------------------------------------------------------------------------------------------------------------------------------------------------------------------------------------------------------------------------------------------------------------------------------------------------------------------------------------------------------------------------------------------------------------------------------------------------------------------------------------------------------------------------------------------------------------------------------------------------------------------------------------------------------------------------------------------------------------------------------------------------------------------------------------------------------------------------------------------------------------------------------------------------------------------------------------------------------------------------------------------------------------------------------------------------------------------------------------------------------------------------------------------------------------------------------------------------------------------------------------------------------------------------------------------------------------------------------------------------------------------------------------------------------------------------------------------------------------------------------|

|            |                                          |                        |                                                                                                                                                                                                                                                                                                                                                                                                                                                                                                                                                                                                                                                                                                                                                                                                                                                                                                                                                                                                                                                                                                                                                                                                                                                                                                                                                                                                                                                                                                                                                                                                                                                                                                                                                                                                                                                                                                                                                                                                                                                                                                                                                                                                                                                                                                                           |
|------------|------------------------------------------|------------------------|---------------------------------------------------------------------------------------------------------------------------------------------------------------------------------------------------------------------------------------------------------------------------------------------------------------------------------------------------------------------------------------------------------------------------------------------------------------------------------------------------------------------------------------------------------------------------------------------------------------------------------------------------------------------------------------------------------------------------------------------------------------------------------------------------------------------------------------------------------------------------------------------------------------------------------------------------------------------------------------------------------------------------------------------------------------------------------------------------------------------------------------------------------------------------------------------------------------------------------------------------------------------------------------------------------------------------------------------------------------------------------------------------------------------------------------------------------------------------------------------------------------------------------------------------------------------------------------------------------------------------------------------------------------------------------------------------------------------------------------------------------------------------------------------------------------------------------------------------------------------------------------------------------------------------------------------------------------------------------------------------------------------------------------------------------------------------------------------------------------------------------------------------------------------------------------------------------------------------------------------------------------------------------------------------------------------------|
|            |                                          |                        | <p>,E2F4,TJP1,G3BP1,PCM1,RNF220,TBC1D14,GNL2,SAE1,RRP36,MCM6,AQR,DHCR7,DDX18,IER3,IGF2R,ADNP,UBA2,NFKB1,UBTF,ZNF622,ARHGDIA,BRD2,CHD7,RBM15B,USP37,HNRNPA1,GAR1,RRS1,PPARGC1B,MAGOH,PBRM1,CTCF,RANBP10,HHEX,ANKRD17,HNRNPR,RRM2,ELF1,ZNF614,NSD1,RSL1D1,CDK7,H3 -</p> <p>3B,RNF138,SETD1B,PKM,FOXK2,KIF2A,HMGB1,MAEA,SMARCD1,GNAQ,YY1,NOL8,MLLT10,IRAK1,PUS7,PIK3C2B,IP6K1,NAT10,TRMT10C,SNU13,SRSF6,EP400,SART1,CEBPZ,MECP2,MBNL1,SKI,TKT,DDX54,AZIN1,TARDBP,XRCC6,PNN,RPL22,ABI1,PCNA,CDC25A,MBD1,CSNK2A2,UPF2,DIAPH1,DDX3X,TNPO2,SACS,LBR,HDGF,NDC1,NCAPH,ZNF789,MCM2,JUND,CFL1,HCFC1,CHEK1,AATF,CLN6,ECSIT,ZMPSTE24,UBAP2,PRMT7,SLC25A5,ARPC4,SLTM,URB1,POM121,CHAMP1,DNAJC21,UBP1,POLE,TRRAP,NUDC,EXOSC9,POLR2A,CCDC86,DNAJC7,DNAJA1,SUMO3,NUP62,TSR1,RBM19,XPO1,PPIA,PRPF3,IK,PHACTR1,TPR,ENC1,SRSF7,UTP20,ZFP36L2,SF3B4,STK17A,PPRC1,EBNA1BP2,ZFR,KEAP1,UBE2N,BAZ1B,NRIP1,MACO1,MRT04,VAPA,TLK1,TEX10,MYBBP1A,DDBI,BACH2,PSMG1,PITX1,GTFC34,NASP,ASXL2,TCP1,CENPF,RALY,ENO1,FUBP1,POLE3,CDK6,CDC5L,CHD3,NUP153,RAN,BEND3,C19ORF48,UBC,ZNF787,TFAM,HSPA4,PPP2CA,SSU72,MSH2,CDK12,ZBTB2,DIDO1,GLYR1,KMT2A,MCM3,NOSTRIN,GRWD1,H4C8,PRDX1,TNPO1,SNHG3,GATAD2A,DKC1,DDX1,H2BC12,STX3,CUL1,THUMPDI,EWSR1,DDX49,CASC3,SSRP1,ARID1B,KNB1,CPSF7,RRP1,TXNRD1,ZNF33B,ATP6V0A1,HNRNPAB,KAT6A,USP36,RBBP4,CNPPD1,SAFB,NCBP1,HEATR1,HSP90AB1,PA2G4,HNRNPK,SMG1,TXNL1,DHX37,PRPF19,SMARCA4,PRKDC,ZNF121,TRA2B,PRMT1,HNRNPC,MALT1,WWP2,SF3A3,SUPT16H,HMGA1,CELF1,RBMXL1,XRCC5,DDX5,PSME3,TMEM97,UTP4,DEK,LMO2,LMNB1,DDX46,EIF4A3,NUP214,TRIP12,IPO7,ACTG1,SURF6,DDX39A,DDX56,CIZ1,CDT1,UBAP2L,NOP56,HNRNPDL,KHDRBS1,HNRNPD,LRPPRC,EIF5A,CTDSP1,SUPT6H,RANBP2,DNAJB6,NOLC1,SNRNP200,SREBF2,CBFA2T3,ABCF1,DANCR,ACACA,TAF22,MGA,NSUN2,AP5Z1,GAPDH,YBX1,LIN28B,RBM3,PGD,SF3A1,LMNB2,AXIN1,MPHOSPH10,PES1,ANP32B,MYH10,IPO5,RREB1,HSPH1,EP300,TGFBR1,DAZAP1,ALYREF,RRP1B,FOSB,PPM1G,STON2,SRRT,PABPC1,SERBP1,AHNAK,PRPF8,COA7,SF3B3,PTMA,THRAP3,MLLT1,HNRNPF,NPM1,RIF1,CITED2,SON,WDR43,TFRC,RUNX1,EIF4G1,TRIM28,U2AF2,NR2F2,BCLAF1,ECPAS,SRSF2,HSP90AA1,MDN1,NFATC3,ZNF521,TRMT1,MCM4,TRIM24,NOP58,RESF1,HNRNPA2B1,SPN,BAG1,SQSTM1,PTBP1,CCAR1,DDX21,SFPQ,PTGER3,SCD,PABPC4,HNRNPM,POLR1A,SRSF3,ANKRD11,EIF3A,MCM7,SMARCC1,MYC,SET,BTG1,IGF2BP1,FOS,MYB,KHSRP,ZEB2,FUS,ILF3,GLUL,ACTB,DHX9,HNRNPU,MCM5,NCL,EGR1,DHCR24,HSPA8,FTH1</p> |
| GO:0043231 | intracellular membrane-bounded organelle | 2.1156696610029647e-60 | <p>HRAS,NOP14,CENPN,TXK,ACSF3,DSG2,SNRPB,TMEM127,MITF,PPP6C,JMJD1C,MIS18BP1,DAP3,RBM48,TOMM5,PPAN,MSH3,TRIP13,CHTOP,ERAL1,ZNF274,SEC23IP,ABRAXAS2,GYG1,PRPF38B,KMT2B,AFF1,MAB,SUPT7L,AP5M1,SREK1,MACROH2A1,BRD9,MED16,FADS2,MUS81,NOL11,ITFG2,BICRA,MTA2,SNHG6,TIRAP,RAD51C,NRROS,MIX23,UTP3,CWC22,CPNE7,POLR3E,UBE2Q1,NEU1,DCAF7,MTREX,RIOX1,PHF5A,NACA,POLR1C,MED6,SRP72,TRIM35,CBX3,PHB,MEETL3,EZH2,SNX17,TOMM70,TCF20,FES,CCDC78,RAB10,DCLRE1C,NOC4L,RFWD3,MFAP1,ULK3,DNM1L,PAXIP1,LRRFIP1,GPATCH3,RHEB,INTS6,PPP6R3,H</p>                                                                                                                                                                                                                                                                                                                                                                                                                                                                                                                                                                                                                                                                                                                                                                                                                                                                                                                                                                                                                                                                                                                                                                                                                                                                                                                                                                                                                                                                                                                                                                                                                                                                                                                                                                                            |

|  |  |  |                                                                                                                                                                                                                                                                                                                                                                                                                                                                                                                                                                                                                                                                                                                                                                                                                                                                                                                                                                                                                                                                                                                                                                                                                                                                                                                                                                                                                                                                                                                                                                                                                                                                                                                                                                                                                                                                                                                                                                                                                                                                                                                                                                                                                                                                                                                                                                                                                                                                                                                                                                                                                                                                                                                                                                                                                                                                                                                                                                                                                                                                                                                                                                                                                                                                                                                                                                                                                                                                                                                                                                                                                                                                                                                          |
|--|--|--|--------------------------------------------------------------------------------------------------------------------------------------------------------------------------------------------------------------------------------------------------------------------------------------------------------------------------------------------------------------------------------------------------------------------------------------------------------------------------------------------------------------------------------------------------------------------------------------------------------------------------------------------------------------------------------------------------------------------------------------------------------------------------------------------------------------------------------------------------------------------------------------------------------------------------------------------------------------------------------------------------------------------------------------------------------------------------------------------------------------------------------------------------------------------------------------------------------------------------------------------------------------------------------------------------------------------------------------------------------------------------------------------------------------------------------------------------------------------------------------------------------------------------------------------------------------------------------------------------------------------------------------------------------------------------------------------------------------------------------------------------------------------------------------------------------------------------------------------------------------------------------------------------------------------------------------------------------------------------------------------------------------------------------------------------------------------------------------------------------------------------------------------------------------------------------------------------------------------------------------------------------------------------------------------------------------------------------------------------------------------------------------------------------------------------------------------------------------------------------------------------------------------------------------------------------------------------------------------------------------------------------------------------------------------------------------------------------------------------------------------------------------------------------------------------------------------------------------------------------------------------------------------------------------------------------------------------------------------------------------------------------------------------------------------------------------------------------------------------------------------------------------------------------------------------------------------------------------------------------------------------------------------------------------------------------------------------------------------------------------------------------------------------------------------------------------------------------------------------------------------------------------------------------------------------------------------------------------------------------------------------------------------------------------------------------------------------------------------------|
|  |  |  | <p> 4C5, FUT8, NCAPH2, SMG5, IFRD2, BRD4, STT3A, PTDS<br/> S2, DHDDS, VKORC1L1, TIMM17A, RRP9, MRPL1, ZNF58<br/> 1, SPIN4, ZNF74, MRPL11, AHCTF1, RPUSD4, CHCHD3,<br/> RNASEH2C, HROB, ANKRD13A, MRPS30, CTDP1, NUP155<br/> , MED1, NVL, POM121C, HNRNPL, NLN, MYO16, PWP1, AT<br/> P11A, DOLPP1, WDR46, MCM10, OXA1L, EFTUD2, CHRAC<br/> 1, CRCP, RANBP3, FRMD8, KMT2D, STAG2, CASP8, TAF4<br/> B, PSMA3, PQBP1, PSMD3, AIFM2, PSPC1, CEP350, MAD<br/> 2L2, MRRF, POLDIP2, PSMC3, ZBTB40, NAA11, TIMM44<br/> , DHX38, ADNP2, NT5C3A, MS4A4A, NOP16, ARID2, DDX<br/> 23, PATZ1, TRNT1, MNS1, RNPS1, MTCH2, LHX4, ZNF51<br/> 2B, RBL1, PPP3R1, SLC25A46, SYPL1, HIF1AN, USP11<br/> , SS18L1, RBM45, MED29, NOSIP, PAFAH1B1, STAG1, H<br/> NRNPH1, USP14, RAB7A, LIMD1, ZNF512, DNMT1, LYL1<br/> , NAA20, BICD1, PPP5C, BAP1, JRK, ANAPC7, SUB1, GT<br/> F2H1, DHX16, BUB3, TOP2B, LYAR, LRWD1, THOP1, CCN<br/> H, NAB2, KAT7, TPP2, CLTC, EEF2, AFG3L2, MSRA, AUR<br/> KAIP1, SNHG20, NIPA2, WDR5, CCT8, KIF5B, TMEM43,<br/> RTL10, FUBP3, IMP4, SNHG17, BCCIP, SPRY2, DLAT, F<br/> AM120A, NOB1, SBF1, RNF40, CUL3, ARPP19, CMPK1, N<br/> ONO, MEF2C, TCF3, NUP160, TEX15, MAF1, GID8, CLSP<br/> N, NOL9, MVK, NBAS, PLK4, CCNY, ZFYVE26, PRPF6, ZC<br/> 3H4, TMEM33, PEBP1, ZNF26, ZNF24, GRSF1, NXF1, UB<br/> QLN4, ACTR8, FAHD1, PSMC5, AGPAT3, STK35, TIMM23<br/> , ZC3HAV1, HNRNPA3, MAPK1, STAR, ZNRF1, EEF1D, CA<br/> SP3, POLR1E, ATP2A2, IPO9, PKP3, ABT1, SURF4, PCL<br/> AF, WDR36, PDSS1, CERS2, DHX33, STRIP1, PGAM5, LE<br/> TM1, CTR9, NCOA5, FADS1, ZFP91, SDAD1, DHX15, UIM<br/> C1, PUM1, NEMP1, MTOR, DHX30, PDPR, RPRD2, UTP18,<br/> IKZF3, KANSL1, CPSF3, SPEN, LCLAT1, GOT2, VDAC1,<br/> SMARCA5, SNX8, CWC25, SF3A2, H2AW, ZNF45, RSF1, T<br/> FAP4, NAA50, PTP4A2, DELE1, PRMT6, TSPYL5, KPNA4<br/> , NIFK, FAF1, HNRNPA0, BAG6, EMD, ZNF131, PCYT1A,<br/> SBNO1, TASOR2, ZNF431, FKBP15, NAP1L4, DHFR, MTD<br/> H, MCOLN3, BAIAP2, COMMD4, HSPA9, MCCC1, TCF7L2,<br/> ZNF239, SRRM2, NSDHL, MRPL15, PRAME, ASCC3, UROD<br/> , SLC29A2, UBE2L3, THOC1, PSMC2, MCMBP, SETMAR, R<br/> PTOR, MRPL45, PPIL2, PPP1R10, MRPS35, HECTD1, TM<br/> EM18, CSTF2, TNF, RAVER1, GRPEL1, PPP4R3A, SAMS<br/> N1, WDR33, NIP7, PPP2R5A, TRMT61A, IGF2BP3, NOL7,<br/> PDCD7, MED28, ELL2, FAM71F2, PUM2, H2AZ2, HAT1, M<br/> CRIP2, CLTA, WDR3, SSBP3, SNRPA, ZNF586, BACH1, D<br/> DX10, PDZD8, RBM10, CERT1, SETX, NFILZ, AP3D1, PS<br/> MG2, STK24, METTL8, APEX1, BPTF, ATP6V1G1, EDC4,<br/> ICE1, RIOK2, NAA15, ARID1A, NUP43, AMMECR1, TRAM<br/> 1, PITHD1, SPECC1, PPP1CC, CAVIN2, ZC3H14, B4GAL<br/> T5, CDC27, HERC2, RAB35, SRSF10, CTSL, AKAP5, SBD<br/> S, RCC1, C1QBP, VPS72, PPM1H, ZNF587B, CRK, TICRR<br/> , MED15, EOGT, STK25, SRSF8, WDR74, PAK2, ARHGAP2<br/> 1, PRPF4, KTN1, PRMT5, SNX9, PCBP2, PTDSS1, ADD1,<br/> TRMT6, RBMX, RNF126, TMEM223, BAZ1A, GPX4, YJU2,<br/> WDR70, MCCC2, SLC25A3, MLLT3, OPA3, ALG8, RAD23B<br/> , VAT1, TAF4, RBM14, RBM8A, KDM3B, BOP1, GOLM1, SE<br/> TD2, ZNF326, API5, INTS13, RPIA, BTBD1, TUBB, FEN<br/> 1, CHAF1A, ZNF282, DYRK1A, PHF3, TFDP2, CASD1, WD<br/> R12, URB2, GTF3C6, SLBP, CUL4A, DNAJC8, JADE2, NU<br/> CKS1, SDCBP, PSMD1, UTP25, TMPO, NUP188, NUP50, P<br/> RPF38A, SSB, AGPAT5, GNL3L, DNTTIP2, CYB5B, IBA5<br/> 7, RILP, RNU6-<br/> 322P, NSRP1, TFIP11, KCTD15, STRBP, PSMB2, WAC, A<br/> DI1, BSN, ARHGEF2, BRCA2, RANBP1, POLR2D, ZDHHC5<br/> , WTAP, COPS2, NIN, BCL7B, RBM42, ZFX, ZC3H7B, ACL<br/> Y, SNRPD1, MED13L, PAF1, ZC3H18, BIRC6, ERMAP, FA<br/> STKD2, RABL6, PHB2, TCOF1, LRRC41, TOMM22, RAP1G<br/> AP2, XRCC2, PDS5A, BRCC3, ZNF75A, SMARCB1, CREBB<br/> P, EXOSC3, WBP11, KIFC3, AHS1, COPS3, UBE4B, INS </p> |
|--|--|--|--------------------------------------------------------------------------------------------------------------------------------------------------------------------------------------------------------------------------------------------------------------------------------------------------------------------------------------------------------------------------------------------------------------------------------------------------------------------------------------------------------------------------------------------------------------------------------------------------------------------------------------------------------------------------------------------------------------------------------------------------------------------------------------------------------------------------------------------------------------------------------------------------------------------------------------------------------------------------------------------------------------------------------------------------------------------------------------------------------------------------------------------------------------------------------------------------------------------------------------------------------------------------------------------------------------------------------------------------------------------------------------------------------------------------------------------------------------------------------------------------------------------------------------------------------------------------------------------------------------------------------------------------------------------------------------------------------------------------------------------------------------------------------------------------------------------------------------------------------------------------------------------------------------------------------------------------------------------------------------------------------------------------------------------------------------------------------------------------------------------------------------------------------------------------------------------------------------------------------------------------------------------------------------------------------------------------------------------------------------------------------------------------------------------------------------------------------------------------------------------------------------------------------------------------------------------------------------------------------------------------------------------------------------------------------------------------------------------------------------------------------------------------------------------------------------------------------------------------------------------------------------------------------------------------------------------------------------------------------------------------------------------------------------------------------------------------------------------------------------------------------------------------------------------------------------------------------------------------------------------------------------------------------------------------------------------------------------------------------------------------------------------------------------------------------------------------------------------------------------------------------------------------------------------------------------------------------------------------------------------------------------------------------------------------------------------------------------------------|

|  |  |  |                                                                                                                                                                                                                                                                                                                                                                                                                                                                                                                                                                                                                                                                                                                                                                                                                                                                                                                                                                                                                                                                                                                                                                                                                                                                                                                                                                                                                                                                                                                                                                                                                                                                                                                                                                                                                                                                                                                                                                                                                                                                                                                                                                                                                                                                                                                                                                                                                                                                                                                                                                                                                                                                                                                                                                                                                                                                                                                                                                                                                                                                                                                                                                                                                                                                                                                                                                                                                                                                                                                                                                                                                                                                                                            |
|--|--|--|------------------------------------------------------------------------------------------------------------------------------------------------------------------------------------------------------------------------------------------------------------------------------------------------------------------------------------------------------------------------------------------------------------------------------------------------------------------------------------------------------------------------------------------------------------------------------------------------------------------------------------------------------------------------------------------------------------------------------------------------------------------------------------------------------------------------------------------------------------------------------------------------------------------------------------------------------------------------------------------------------------------------------------------------------------------------------------------------------------------------------------------------------------------------------------------------------------------------------------------------------------------------------------------------------------------------------------------------------------------------------------------------------------------------------------------------------------------------------------------------------------------------------------------------------------------------------------------------------------------------------------------------------------------------------------------------------------------------------------------------------------------------------------------------------------------------------------------------------------------------------------------------------------------------------------------------------------------------------------------------------------------------------------------------------------------------------------------------------------------------------------------------------------------------------------------------------------------------------------------------------------------------------------------------------------------------------------------------------------------------------------------------------------------------------------------------------------------------------------------------------------------------------------------------------------------------------------------------------------------------------------------------------------------------------------------------------------------------------------------------------------------------------------------------------------------------------------------------------------------------------------------------------------------------------------------------------------------------------------------------------------------------------------------------------------------------------------------------------------------------------------------------------------------------------------------------------------------------------------------------------------------------------------------------------------------------------------------------------------------------------------------------------------------------------------------------------------------------------------------------------------------------------------------------------------------------------------------------------------------------------------------------------------------------------------------------------------|
|  |  |  | <p> IG1, TMX2, NUP98, HNRNPUL1, CNOT1, LYN, ASH1L, LR<br/> RC59, GEMIN5, PHACTR2, PLAGL2, APC, BTF3, POLR1B<br/> , JPT2, DDX42, CAPN1, ELOF1, WDR6, NFYC, SF1, PELP<br/> 1, SLC12A2, XRN2, TMEM201, EZR, TRUB2, DDX20, URM<br/> 1, DDX51, MMS19, SGPP2, ELOA, TAF9, ACAT2, ELAVL1<br/> , UTP15, VCP, DNAJB12, WASHC5, RYBP, SAFB2, GBP2,<br/> PSIP1, CSTB, CSNK1G2, DCAF13, BEX4, RBM12, STIP1<br/> , CDK4, DVL2, PNO1, POLR3C, THG1L, MRPS2, RBM25, S<br/> ETD1A, RRP12, SCAP, WDR82, SMC1A, AGO2, E2F4, TJP<br/> 1, VPS26A, FOXRED2, G3BP1, PCM1, RNF220, TBC1D14<br/> , GNL2, SAE1, RRP36, MCM6, AQR, DHCR7, CLCN6, ARL8<br/> B, DDX18, IER3, IGF2R, ATP6V0D1, ADNP, UBA2, NFKB<br/> 1, UBTB, ZNF622, ARHGDIA, BRD2, CHD7, RBM15B, DOK<br/> 3, USP37, HNRNPA1, GAR1, RRS1, PPARGC1B, MAGOH, P<br/> BRM1, CTCF, RANBP10, HHEX, ANKRD17, HNRNPR, RRM2<br/> , RRM1, PI4KA, SEC24B, ELF1, ZNF614, NSD1, RSL1D1<br/> , CDK7, H3-<br/> 3B, RNF138, SETD1B, PPIF, PKM, FOXK2, KIF2A, HMGB<br/> 1, ATAD3B, MAEA, SMARCD1, GNAQ, CANX, YY1, NOL8, M<br/> LLT10, IRAK1, PUS7, PIK3C2B, IP6K1, NAT10, TRMT1<br/> OC, SNU13, SRSF6, EP400, MTHFD1, ADSS2, SART1, CE<br/> BPZ, MECPP2, CSDE1, MBNL1, SKI, TKT, DDX54, AZIN1,<br/> TARDBP, XRCC6, PNN, RPL22, ABI1, PCNA, CDC25A, MB<br/> D1, CSNK2A2, UPF2, DIAPH1, DDX3X, IQGAP2, IDI1, T<br/> NPO2, SACS, LBR, HDGF, NDC1, NCAPH, ZNF789, VPS35<br/> , ATP5MC3, MCM2, JUND, CFL1, HCFC1, CHEK1, AATF, C<br/> LN6, ECSIT, ZMPSTE24, UBAP2, PRMT7, OXCT1, RETRE<br/> G2, SLC25A5, ARPC4, SLTM, CYP3A5, URB1, VAC14, PO<br/> M121, CHAMP1, DNAJC21, UBP1, POLE, TRRAP, NUDC, E<br/> XOSC9, POLR2A, CCDC86, DNAJC7, DNAJA1, TEX261, S<br/> UMO3, NUP62, DYNC1H1, TSR1, RBM19, XPO1, PPIA, PR<br/> PF3, IK, CLCN7, PHACTR1, SERPINE1, TPR, ENC1, SRS<br/> F7, UTP20, TGFBRAP1, ZFP36L2, SF3B4, STK17A, PPR<br/> C1, EBNA1BP2, ZFR, ARFGAP2, KEAP1, TFB2M, UBE2N,<br/> BAZ1B, NRIP1, MACO1, MRTO4, VAPA, TLK1, TEX10, GF<br/> M1, MYBBP1A, DDB1, BACH2, PSMG1, PITX1, GTF3C4, N<br/> ASP, ASXL2, CHST3, TCP1, CENPF, YWHAB, RALY, ENO1<br/> , FUBP1, POLE3, CDK6, CDC5L, CHD3, ST3GAL2, NUP15<br/> 3, RAN, BEND3, C19ORF48, UBC, WDR81, ZNF787, TFAM<br/> , HSPA4, AK2, PPP2CA, SSU72, MSH2, CDK12, ZBTB2, D<br/> IDO1, GLYR1, MAN2A2, KMT2A, MCM3, NOSTRIN, GRWD1<br/> , TOMM40, H4C8, SLC30A10, CERS6, PRDX1, TNPO1, SN<br/> HG3, GATAD2A, DKC1, DDX1, H2BC12, STX3, CUL1, LTB<br/> R, THUMPD1, EWSR1, DDX49, CASC3, SSRP1, ARID1B, K<br/> PNB1, CPSF7, RRP1, TXNRD1, ZNF33B, ATP6V0A1, HNR<br/> NPAB, KAT6A, ATAD3A, ARF6, USP36, RBBP4, CNPPD1,<br/> SAFB, NCBP1, HEATR1, CCT2, HSP90AB1, PA2G4, HNRN<br/> PK, SMG1, TXNL1, DHX37, FDFT1, PRPF19, SMARCA4, P<br/> RKDC, YES1, ZNF121, TRA2B, PRMT1, HNRNPC, MALT1,<br/> WWP2, SF3A3, SUPT16H, HMGA1, CELF1, NCLN, RBMXL1<br/> , XRCC5, DDX5, PSME3, TMEM97, ANK1, UTP4, DEK, LMO<br/> 2, LMNB1, DDX46, LSS, EIF4A3, NDST1, NUP214, TRIP<br/> 12, IPO7, ACTG1, SURF6, DDX39A, DDX56, CIZ1, CDT1<br/> , UBAP2L, NOP56, HNRNPDL, CORO1C, KHDRBS1, HNRNP<br/> D, RAPGEF1, LRPPRC, EIF5A, CTDSP1, SUPT6H, RANBP<br/> 2, DNAJB6, NOLC1, SNRNP200, SREBF2, CBFA2T3, STX<br/> BP5, ABCF1, DANCER, ACACA, TAF42, MGA, NSUN2, AP5Z<br/> 1, HSPD1, GAPDH, YBX1, LIN28B, EIF5B, PCYT2, ATP6<br/> V1C1, RBM3, STARD7, PGD, SF3A1, LMNB2, AXIN1, MS4<br/> A3, MPHOSPH10, GDI2, PES1, ANP32B, MYH10, IPO5, R<br/> REB1, HSPH1, EP300, TGFBR1, DAZAP1, ALYREF, RRP1<br/> B, FOSB, PPM1G, STON2, SRRT, PABPC1, SERBP1, ATP1<br/> 3A3, AHNK, PRPF8, COA7, SF3B3, PTMA, FTL, THRAP3<br/> , MLLT1, ELOVL6, HNRNPF, MT-<br/> ND1, NPM1, RIF1, CITED2, SON, WDR43, TFRC, RUNX1,<br/> EIF4G1, TRIM28, ACP5, U2AF2, NR2F2, BCLAF1, ECPA </p> |
|--|--|--|------------------------------------------------------------------------------------------------------------------------------------------------------------------------------------------------------------------------------------------------------------------------------------------------------------------------------------------------------------------------------------------------------------------------------------------------------------------------------------------------------------------------------------------------------------------------------------------------------------------------------------------------------------------------------------------------------------------------------------------------------------------------------------------------------------------------------------------------------------------------------------------------------------------------------------------------------------------------------------------------------------------------------------------------------------------------------------------------------------------------------------------------------------------------------------------------------------------------------------------------------------------------------------------------------------------------------------------------------------------------------------------------------------------------------------------------------------------------------------------------------------------------------------------------------------------------------------------------------------------------------------------------------------------------------------------------------------------------------------------------------------------------------------------------------------------------------------------------------------------------------------------------------------------------------------------------------------------------------------------------------------------------------------------------------------------------------------------------------------------------------------------------------------------------------------------------------------------------------------------------------------------------------------------------------------------------------------------------------------------------------------------------------------------------------------------------------------------------------------------------------------------------------------------------------------------------------------------------------------------------------------------------------------------------------------------------------------------------------------------------------------------------------------------------------------------------------------------------------------------------------------------------------------------------------------------------------------------------------------------------------------------------------------------------------------------------------------------------------------------------------------------------------------------------------------------------------------------------------------------------------------------------------------------------------------------------------------------------------------------------------------------------------------------------------------------------------------------------------------------------------------------------------------------------------------------------------------------------------------------------------------------------------------------------------------------------------------|

|            |                                    |                       |                                                                                                                                                                                                                                                                                                                                                                                                                                                                                                                                                                                                                                                                                                                                                                                                                                                                                                                                                                                                                                                                                                                                                                                                                                                                                                                                                                                                                                                                                                                                                                                                                                                                                                                                                                                                                                                                                                                                                                                                                                                                                                                                                                                                                                                                                                                                                                                                                                                                                                                                                                                                                                                                                                                                                                                                                                                                                                          |
|------------|------------------------------------|-----------------------|----------------------------------------------------------------------------------------------------------------------------------------------------------------------------------------------------------------------------------------------------------------------------------------------------------------------------------------------------------------------------------------------------------------------------------------------------------------------------------------------------------------------------------------------------------------------------------------------------------------------------------------------------------------------------------------------------------------------------------------------------------------------------------------------------------------------------------------------------------------------------------------------------------------------------------------------------------------------------------------------------------------------------------------------------------------------------------------------------------------------------------------------------------------------------------------------------------------------------------------------------------------------------------------------------------------------------------------------------------------------------------------------------------------------------------------------------------------------------------------------------------------------------------------------------------------------------------------------------------------------------------------------------------------------------------------------------------------------------------------------------------------------------------------------------------------------------------------------------------------------------------------------------------------------------------------------------------------------------------------------------------------------------------------------------------------------------------------------------------------------------------------------------------------------------------------------------------------------------------------------------------------------------------------------------------------------------------------------------------------------------------------------------------------------------------------------------------------------------------------------------------------------------------------------------------------------------------------------------------------------------------------------------------------------------------------------------------------------------------------------------------------------------------------------------------------------------------------------------------------------------------------------------------|
|            |                                    |                       | <p>S, SRSF2, HSP90AA1, MDN1, NFATC3, ZNF521, TRMT1, SQLE, MCM4, TRIM24, NOP58, RESF1, HNRNPA2B1, KIF1A, SPN, BAG1, SQSTM1, PTBP1, CCAR1, DDX21, SFPQ, PTGER3, SCD, PABPC4, HNRNPM, POLR1A, SRSF3, ANKRD11, EIF3A, MCM7, SMARCC1, MYC, SET, VGF, BTG1, MT-CYB, IGF2BP1, FOS, HMGCR, MYB, KHSRP, ZEB2, FUS, ILF3, FASN, GLUL, ACTB, DHX9, HNRNPU, MCM5, NCL, EGR1, DHCR24, HSPA8, FTH1</p>                                                                                                                                                                                                                                                                                                                                                                                                                                                                                                                                                                                                                                                                                                                                                                                                                                                                                                                                                                                                                                                                                                                                                                                                                                                                                                                                                                                                                                                                                                                                                                                                                                                                                                                                                                                                                                                                                                                                                                                                                                                                                                                                                                                                                                                                                                                                                                                                                                                                                                                 |
| GO:0005622 | intracellular anatomical structure | 2.728636610854794e-54 | <p>HRAS, NOP14, CENPN, TXK, ACSF3, DSG2, SNRPB, TMEM127, MITF, PPP6C, JMJD1C, MIS18BP1, DAP3, RBM48, TOMM5, PPAN, MSH3, TRIP13, CHTOP, ERL1, ZNF274, SEC23IP, ABRAXAS2, DNAAJA2, GYG1, PRPF38B, KMT2B, AFF1, MMAB, RNASEH1, SUPT7L, AP5M1, SREK1, MACROH2A1, BRD9, MED16, FADS2, MUS81, NOL11, ITFG2, BITCRA, MTA2, SNHG6, TIRAP, RAD51C, NRROS, AAMP, MIX23, UTP3, CWC22, CPNE7, BEGAIN, POLR3E, UBE2Q1, NEU1, DCAF7, MTREX, OTUD6B, RIOX1, PHF5A, NACA, POLR1C, MED6, SRP72, TRIM35, CBX3, PHB, METTL3, EZH2, SNX17, TOMM70, TCF20, FES, CCDC78, RAB10, DCLRE1C, NOC4L, RFWD3, MFAP1, ULK3, DNMT1L, PAXIP1, LRRFIP1, GPATCH3, RHEB, ASAP1, INTS6, PPP6R3, H4C5, FUT8, NCAPH2, SMG5, IFRD2, BRD4, STT3A, PTDSS2, DHDDS, VKORC1L1, TIMM17A, RRP9, MRPL1, ZNF581, SPIN4, ZNF74, MRPL11, AHCTF1, RPUSD4, CMBL, CHCHD3, CDC123, RNASEH2C, HROB, ANKRD13A, MRPS30, CTDP1, NUP155, MED1, NVL, POM121C, KIF26B, SRM, HNRNPL, NLN, MYO16, PWP1, ATP11A, DOLPP1, WDR46, MCM10, OXA1L, EFTUD2, CHAC1, EML4, CRCP, RANBP3, FRMD8, KMT2D, STAG2, CASP8, TAF4B, PSMA3, PQBP1, PSMD3, AIFM2, PSPC1, CEP350, MAD2L2, MRRF, POLDIP2, PSMC3, ZBTB40, NAA11, TIMM44, DHX38, ADNP2, GART, NT5C3A, MS4A4A, NOP16, FBXO45, ARID2, DDX23, PATZ1, TRIM44, TRNT1, MNS1, RNPS1, MTCH2, ALMS1, LHX4, ZNF512B, RBL1, PPP3R1, SLC25A46, SYPL1, HIF1AN, USP11, SS18L1, RBM45, MED29, NOSIP, PAFAH1B1, STAG1, HNRNPH1, USP14, RAB7A, LIMD1, ZNF512, DNMT1, LYL1, NAA20, BICD1, PPP5C, BAP1, JRK, ANAPC7, SUB1, GTF2H1, DHX16, BUB3, GAB2, TOP2B, LYAR, LRWD1, THOP1, CCNH, NAB2, EXOC7, EIF4EBP2, CCT6A, KAT7, TPP2, CLTC, TSR3, EEF2, AFG3L2, MSRA, AURKAIPI, SNHG20, NIPA2, WDR5, CCT8, KIF5B, FAM13B, TMEM43, RTL10, FUBP3, IMP4, SNHG17, BCCIP, SPRY2, DLAT, FAM120A, NOB1, SBF1, RNF40, CUL3, ARPP19, CMPIK1, NONO, MEF2C, UBR3, TCF3, NUP160, TEX15, MAF1, GID8, CLSPN, NOL9, MVK, NBAS, PLK4, CCNY, SLK, ZFYVE26, PRPF6, ZC3H4, TMEM33, PEBP1, ZNF26, ZNF24, GSPT1, GRSF1, NXF1, UBQLN4, ACTR8, FAHD1, PSMC5, AGPAT3, STK35, TIMM23, ZC3HAV1, CAPZA1, HNRNPA3, MAPK1, STAR, ZNRF1, EEF1D, CASP3, POLR1E, ATP2A2, IPO9, PKP3, ABT1, TULP4, SURF4, PCLAF, WDR36, HBG1, PDSS1, CERS2, DHX33, STRIP1, PGAM5, NSMAF, LETM1, CTR9, NCOA5, FADS1, ZFP91, SDAD1, TBCD, DHX15, UIMC1, PUM1, NEMP1, MTOR, DHX30, PDPR, RPRD2, UTP18, IKZF3, KANSL1, CPSF3, SPEN, LCLAT1, GOT2, VDAC1, SMG9, SMARCA5, SNX8, CWC25, SF3A2, H2AW, EIF3D, ZNF45, RSF1, TFAP4, NAA50, PTP4A2, CLDN11, DELE1, PRMT6, TSPYL5, KPNA4, NIFK, FAF1, HNRNPA0, BAG6, EMD, ZNF131, PCYT1A, SBNO1, TASOR2, ZNF431, FKBP15, NAP1L4, DHFR, MTDH, MCOLN3, BAIAP2, COMMD4, HSPA9, MCCC1, TCF7L2, ZNF239, SRRM2, NSDHL, MRPL15, PRAME, GMPS, ASCC3, UROD, SLC29A2, UBE2L3, THOC1, PSMC2, MCMBP, SETMAR, RPTOR, MRPL45, PPII2, PPP1R10, MRPS35, HECTD1, TMEM18, CSTF2, TNF, RAVER1, GRPEL1, RABGGTB, EIF4B, PPP4R3A, SAMSN1, WDR33, NIP7, PPP2R5A, TRMT61A, IGF2BP3, NOL</p> |

|  |  |  |                                                                                                                                                                                                                                                                                                                                                                                                                                                                                                                                                                                                                                                                                                                                                                                                                                                                                                                                                                                                                                                                                                                                                                                                                                                                                                                                                                                                                                                                                                                                                                                                                                                                                                                                                                                                                                                                                                                                                                                                                                                                                                                                                                                                                                                                                                                                                                                                                                                                                                                                                                                                                                                                                                                                                                                                                                                                                                                                                                                                                                                                                                                                                                                                                                                                                                                      |
|--|--|--|----------------------------------------------------------------------------------------------------------------------------------------------------------------------------------------------------------------------------------------------------------------------------------------------------------------------------------------------------------------------------------------------------------------------------------------------------------------------------------------------------------------------------------------------------------------------------------------------------------------------------------------------------------------------------------------------------------------------------------------------------------------------------------------------------------------------------------------------------------------------------------------------------------------------------------------------------------------------------------------------------------------------------------------------------------------------------------------------------------------------------------------------------------------------------------------------------------------------------------------------------------------------------------------------------------------------------------------------------------------------------------------------------------------------------------------------------------------------------------------------------------------------------------------------------------------------------------------------------------------------------------------------------------------------------------------------------------------------------------------------------------------------------------------------------------------------------------------------------------------------------------------------------------------------------------------------------------------------------------------------------------------------------------------------------------------------------------------------------------------------------------------------------------------------------------------------------------------------------------------------------------------------------------------------------------------------------------------------------------------------------------------------------------------------------------------------------------------------------------------------------------------------------------------------------------------------------------------------------------------------------------------------------------------------------------------------------------------------------------------------------------------------------------------------------------------------------------------------------------------------------------------------------------------------------------------------------------------------------------------------------------------------------------------------------------------------------------------------------------------------------------------------------------------------------------------------------------------------------------------------------------------------------------------------------------------------|
|  |  |  | <p> 7, PDCD7, MED28, ELL2, FAM71F2, PUM2, H2AZ2, HAT1, MCRIP2, CLTA, WDR3, SSBP3, SNRPA, ZNF586, BACH1, DDX10, PDZD8, RBM10, CERT1, SETX, NFILZ, TRMT2A, AP3D1, NAPA, PSMG2, STK24, METTL8, APEX1, BPTF, ATP6V1G1, EDC4, ICE1, RIOK2, NAA15, ARID1A, NUP43, AMMECR1, TRAM1, PITHD1, SPECC1, ADO, PPP1CC, KCNQ5, CAVIN2, ZC3H14, B4GALT5, CDC27, HERC2, RAB35, SRSF10, CTSL, AKAP8, SBDS, RCC1, C1QBP, VPS72, PPM1H, ZNF587B, CRK, TICRR, MED15, EOGT, STK25, CAPNS1, SRSF8, WDR74, PAK2, ZMYND19, ARHGAP21, PRPF4, KTN1, PRMT5, SNX9, PCBP2, PTDSS1, ADD1, TRMT6, RBMX, RNF126, TMEM223, BAZ1A, DPYS, GPX4, YJU2, WDR70, MCCC2, SLC25A3, MLLT3, OPA3, ALG8, RAD23B, VAT1, TAF4, RBM14, RBM8A, ARHGAP6, KDM3B, BOP1, GOLM1, LRP8, SETD2, ZNF326, API5, INTS13, RPIA, UCK2, BTBD1, TUBB, FEN1, CHAF1A, ZNF282, DYRK1A, PHF3, TFDP2, CASD1, WDR12, URB2, GTF3C6, SLBP, CUL4A, DNAJC8, JADE2, NUCKS1, SDCBP, PSMD1, UTP25, AMD1, TMPO, NUP188, NUP50, PRPF38A, SSB, CDC37, ECHDC1, AGPAT5, GNL3L, DNTTIP2, CYB5B, IBA57, RILP, RNU6-322P, NSRP1, TFIP11, KCTD15, STRBP, PSMB2, WAC, EIF3G, ADI1, BSN, DHX29, ARHGEF2, BRCA2, RANBP1, POLR2D, ZDHHC5, EIF3M, WTAP, COPS2, NIN, BCL7B, RBM42, ZFX, ZC3H7B, ACLY, SNRPD1, PAN3, MED13L, PAF1, ZC3H18, BIRC6, ERMAPP, FASTKD2, RABL6, PHB2, TCOF1, LRRC41, TOMM22, RAP1GAP2, GRB10, XRCC2, PDS5A, BRCC3, ZNF75A, SMARCB1, CREBBP, EXOSC3, WBP11, KIFC3, AHS1, EPRS1, COPS3, UBE4B, INSIG1, LSM14A, ABLIM1, TMX2, NUP98, HNRNPUL1, CNOT1, LYN, ASH1L, LRRC59, GEMIN5, PHACTR2, PLAGL2, APC, BTF3, POLR1B, JPT2, DDX42, CAPN1, ELOF1, WDR6, NFYC, SF1, PELP1, SLC12A2, XRN2, TMEM201, EZR, TRUB2, DD X20, URM1, DDX51, MMS19, SGPP2, ELOA, TAF9, ACAT2, YWHAG, ELAVL1, UTP15, VCP, DNAJB12, WASHC5, RYBP, SAFB2, GBP2, PSIP1, CSTB, CSNK1G2, DCAF13, BEX4, RBM12, STIP1, CDK4, DVL2, PNO1, POLR3C, THG1L, MRPS2, RBM25, SETD1A, RRP12, SCAP, WDR82, SMC1A, AGO2, E2F4, TJP1, VPS26A, FOXRED2, G3BP1, PCM1, RNF220, TBC1D14, GNL2, SAE1, RRP36, MCM6, AQR, DHCR7, CLCN6, ARL8B, DDX18, IER3, QSER1, IGFBP2, ATP6V0D1, ADNP, UBA2, NFKB1, UBTB, ZNF622, ARHGDI1, B RD2, CHD7, RBM15B, DOK3, USP37, HNRNPA1, GAR1, RSS1, PPARGC1B, MAGOH, PBRM1, CTCF, RANBP10, HHEX, ANKRD17, HNRNPR, RRM2, RRM1, PI4KA, SEC24B, ELF1, ZNF614, NSD1, RSL1D1, CCT3, CDK7, H3-3B, RNF138, SETD1B, PPIF, PKM, FOXK2, KIF2A, HMGB1, ATAD3B, MAEA, BZW1, SMARCD1, GNAQ, CANX, YY1, NOL8, MLLT10, IRAK1, PUS7, PIK3C2B, IP6K1, NAT10, TRMT10C, METAP2, SNU13, SRSF6, EP400, AASDHPPT, MTHFD1, ADSS2, SART1, CEBPZ, MECP2, CSDE1, PARD3, MBNL1, SKI, PRKAR2B, TKT, DDX54, AZIN1, CCDC6, N4BP2, TARDBP, LARP4, XRCC6, PNN, RPL22, ABI1, KLHL21, PCNA, CDC25A, MBD1, CSNK2A2, UPF2, DIAPH1, DX3X, KIAA0753, IQGAP2, IDI1, TNPO2, SACS, LBR, HDGF, NDC1, NCAPH, ZNF789, VPS35, ATP5MC3, EIF4G2, MCM2, JUND, CFL1, PFAS, HCFC1, CHEK1, AATF, CLN6, ECSIT, ZMPSTE24, UBAP2, PRMT7, OXCT1, RETREG2, SLC25A5, ARPC4, SLTM, CYP3A5, URB1, S1PR3, VAC14, POM121, CHAMP1, DNAJC21, UBP1, POLE, TRRAP, PPI5K2, NUDC, EXOSC9, CSK, POLR2A, CCDC86, DNAJC7, DNAJA1, TEX261, SUMO3, NUP62, DYNC1H1, TSR1, RBM19, XPO1, PPIA, PRPF3, IK, CLCN7, PHACTR1, SERPIN E1, TPR, ENC1, SRSF7, UTP20, TGFBAP1, ZFP36L2, SF3B4, STK17A, PPRC1, SLC38A2, EBNA1BP2, ZFR, ARFGAP2, KEAP1, TFB2M, UBE2N, BAZ1B, NRIP1, MACO1, M </p> |
|--|--|--|----------------------------------------------------------------------------------------------------------------------------------------------------------------------------------------------------------------------------------------------------------------------------------------------------------------------------------------------------------------------------------------------------------------------------------------------------------------------------------------------------------------------------------------------------------------------------------------------------------------------------------------------------------------------------------------------------------------------------------------------------------------------------------------------------------------------------------------------------------------------------------------------------------------------------------------------------------------------------------------------------------------------------------------------------------------------------------------------------------------------------------------------------------------------------------------------------------------------------------------------------------------------------------------------------------------------------------------------------------------------------------------------------------------------------------------------------------------------------------------------------------------------------------------------------------------------------------------------------------------------------------------------------------------------------------------------------------------------------------------------------------------------------------------------------------------------------------------------------------------------------------------------------------------------------------------------------------------------------------------------------------------------------------------------------------------------------------------------------------------------------------------------------------------------------------------------------------------------------------------------------------------------------------------------------------------------------------------------------------------------------------------------------------------------------------------------------------------------------------------------------------------------------------------------------------------------------------------------------------------------------------------------------------------------------------------------------------------------------------------------------------------------------------------------------------------------------------------------------------------------------------------------------------------------------------------------------------------------------------------------------------------------------------------------------------------------------------------------------------------------------------------------------------------------------------------------------------------------------------------------------------------------------------------------------------------------|

|            |                                   |                           |                                                                                                                                                                                                                                                                                                                                                                                                                                                                                                                                                                                                                                                                                                                                                                                                                                                                                                                                                                                                                                                                                                                                                                                                                                                                                                                                                                                                                                                                                                                                                                                                                                                                                                                                                                                                                                                                                                                                                                                                                                                                                                                                                                                  |
|------------|-----------------------------------|---------------------------|----------------------------------------------------------------------------------------------------------------------------------------------------------------------------------------------------------------------------------------------------------------------------------------------------------------------------------------------------------------------------------------------------------------------------------------------------------------------------------------------------------------------------------------------------------------------------------------------------------------------------------------------------------------------------------------------------------------------------------------------------------------------------------------------------------------------------------------------------------------------------------------------------------------------------------------------------------------------------------------------------------------------------------------------------------------------------------------------------------------------------------------------------------------------------------------------------------------------------------------------------------------------------------------------------------------------------------------------------------------------------------------------------------------------------------------------------------------------------------------------------------------------------------------------------------------------------------------------------------------------------------------------------------------------------------------------------------------------------------------------------------------------------------------------------------------------------------------------------------------------------------------------------------------------------------------------------------------------------------------------------------------------------------------------------------------------------------------------------------------------------------------------------------------------------------|
|            |                                   |                           | <p> RT04,VAPA,TLK1,TEX10,GFM1,MYBBP1A,DDB1,BAC<br/> H2,PSMG1,PITX1,GTF3C4,NASP,ASXL2,CHST3,TCP<br/> 1,CENPF,YWHAB,RALY,ENO1,FAM83H,CCT5,FUBP1,<br/> POLE3,CDK6,CDC5L,CHD3,ST3GAL2,NUP153,RAN,B<br/> END3,C19ORF48,UBC,WDR81,ZNF787,TFAM,HSPA4,<br/> AK2,PPP2CA,SSU72,MSH2,CDK12,ZBTB2,DIDO1,GL<br/> YR1,MAN2A2,KMT2A,MCM3,NOSTRIN,GRWD1,TOMM40<br/> ,PAICS,H4C8,SLC30A10,CERS6,ARMC6,PRDX1,TNP<br/> O1,SNHG3,GATAD2A,DKC1,DDX1,H2BC12,STX3,CUL<br/> 1,LTBR,THUMPD1,CTPS1,EWSR1,DDX49,CASC3,SSR<br/> P1,ARID1B,KPNB1,CPSF7,RRP1,SPTB,TXNRD1,ZNF<br/> 33B,ATP6V0A1,HNRNPAB,KAT6A,ATAD3A,ARF6,USP<br/> 36,RBBP4,MT-<br/> RNR2,CNPPD1,SAFB,NCBP1,HEATR1,CCT2,HSP90AB<br/> 1,EIF3B,RCS1,PA2G4,HNRNPK,SMG1,TXNL1,DHX3<br/> 7,FDFT1,PRPF19,SMARCA4,EIF3J,PRKDC,YES1,ZN<br/> F121,TRA2B,PRMT1,HNRNPC,MALT1,WWP2,SF3A3,S<br/> UPT16H,HMGA1,FARSA,CELF1,NCLN,RBMXL1,XRCC5<br/> ,DDX5,PSME3,TMEM97,ANK1,UTP4,DEK,LMO2,LMNB<br/> 1,DDX46,LSS,EIF4A3,NDST1,NUP214,TRIP12,IPO<br/> 7,ACTG1,SURF6,DDX39A,DDX56,CIZ1,CDT1,UBAP2<br/> L,NOP56,HNRNPD,LCOR1C,KHDRBS1,HNRNPD,RAPG<br/> EF1,LRRP1,EIF5A,FAM136A,CTDSP1,SUPT6H,RAN<br/> BP2,DNAJB6,NOLC1,SNRNP200,SREBF2,CBFA2T3,S<br/> TXBP5,ABCF1,DANCR,ACACA,TAF12,MGA,NSUN2,AP<br/> 5Z1,HSPD1,PIM2,GAPDH,YBX1,LIN28B,EIF5B,PCY<br/> T2,ATP6V1C1,RBM3,STARD7,PGD,SF3A1,LMNB2,AX<br/> IN1,MS4A3,MPHOSPH10,GDI2,PES1,ANP32B,MYH10<br/> ,IPO5,RREB1,HSPH1,EP300,TGFB1,DAZAP1,ALYR<br/> EF,PCNT,STMN1,RRP1B,CLUH,FOSB,PPM1G,STON2,<br/> SRRT,PABPC1,PRRC2C,SERBP1,ATP13A3,AHNAK,PR<br/> PF8,COA7,SF3B3,PTMA,FTL,THRAP3,MLLT1,ELOVL<br/> 6,HNRNPF,MT-<br/> ND1,NPM1,RIF1,CITED2,ETF1,SON,CDV3,WDR43,T<br/> FRC,RUNX1,NQO1,EIF4G1,TRIM28,ACP5,NEFH,U2A<br/> F2,NR2F2,BCLAF1,ECPAS,SRSF2,HSP90AA1,MDN1,<br/> NFATC3,ZNF521,CAPRIN1,TRMT1,SQLE,MCM4,TRIM<br/> 24,NOP58,RESF1,HNRNPA2B1,KIF1A,SPN,BAG1,LA<br/> RP1,SQSTM1,HBZ,PTBP1,CCAR1,MAT2A,DDX21,HMG<br/> CS1,SFPQ,PTGER3,SCD,PABPC4,HNRNPM,NAV1,POL<br/> R1A,KCNH2,SRSF3,ANKRD11,EIF3A,MCM7,SMARCC1<br/> ,MYC,SET,VGF,BTG1,MT-<br/> CYB,IGF2BP1,FOS,GCLM,HMGC,SPTA1,MYB,ODC1,<br/> KHSRP,ZEB2,RELN,FUS,ILF3,FASN,GLUL,ACTB,DH<br/> X9,MT-<br/> RNR1,HNRNPU,MCM5,NCL,EGR1,DHCR24,HSPA8,FTH<br/> 1 </p> |
| GO:0043227 | membrane-<br>bounded<br>organelle | 6.633879674<br>865536e-52 | <p> HRAS,NOP14,CENPN,TKX,ACSF3,DSG2,SNRBP,TMEM<br/> 127,MITF,PPP6C,JMJD1C,MIS18BP1,DAP3,RBM48,<br/> TOMM5,PPAN,MSH3,TRIP13,CHTOP,ERAL1,ZNF274,<br/> SEC23IP,ABRAXAS2,DNAJA2,GYG1,PRPF38B,KMT2B<br/> ,AFF1,MMAB,SUPT7L,AP5M1,SREK1,MACROH2A1,BR<br/> D9,MED16,FADS2,MUS81,NOL11,ITFG2,BICRA,MTA<br/> 2,SNHG6,TIRAP,RAD51C,NRROS,MIX23,UTP3,CWC2<br/> 2,CPNE7,POLR3E,UBE2Q1,NEU1,DCAF7,MTREX,RIO<br/> X1,PHF5A,NACA,POLR1C,MED6,SRP72,TRIM35,CBX<br/> 3,PHB,METTL3,EZH2,SNX17,TOMM70,TCF20,FES,C<br/> CDC78,RAB10,DCLRE1C,NOC4L,RFWD3,MFAP1,ULK3<br/> ,DMN1L,PAXIP1,LRRFIP1,GPATCH3,RHEB,INTS6,P<br/> PP6R3,H4C5,FUT8,NCAPH2,SMG5,IFRD2,BRD4,STT<br/> 3A,PTDSS2,DHDDS,VKORC1L1,TIMM17A,RRP9,MRPL<br/> 1,ZNF581,SPIN4,ZNF74,MRPL11,AHCTF1,RPUSD4,<br/> CMBL,CHCHD3,RNASEH2C,HROB,ANKRD13A,MRPS30,<br/> CTDP1,NUP155,MED1,NVL,POM121C,HNRNPL,NLN,M<br/> YO16,PWP1,ATP11A,DOLPP1,WDR46,MCM10,OXA1L,<br/> EFTUD2,CHAC1,CRCP,RANBP3,FRMD8,KMT2D,STAG </p>                                                                                                                                                                                                                                                                                                                                                                                                                                                                                                                                                                                                                                                                                                                                                                                                                                                                                                                                                                                                                                                                                                                                                                                                                               |

|  |  |  |                                                                                                                                                                                                                                                                                                                                                                                                                                                                                                                                                                                                                                                                                                                                                                                                                                                                                                                                                                                                                                                                                                                                                                                                                                                                                                                                                                                                                                                                                                                                                                                                                                                                                                                                                                                                                                                                                                                                                                                                                                                                                                                                                                                                                                                                                                                                                                                                                                                                                                                                                                                                                                                                                                                                                                                                                                                          |
|--|--|--|----------------------------------------------------------------------------------------------------------------------------------------------------------------------------------------------------------------------------------------------------------------------------------------------------------------------------------------------------------------------------------------------------------------------------------------------------------------------------------------------------------------------------------------------------------------------------------------------------------------------------------------------------------------------------------------------------------------------------------------------------------------------------------------------------------------------------------------------------------------------------------------------------------------------------------------------------------------------------------------------------------------------------------------------------------------------------------------------------------------------------------------------------------------------------------------------------------------------------------------------------------------------------------------------------------------------------------------------------------------------------------------------------------------------------------------------------------------------------------------------------------------------------------------------------------------------------------------------------------------------------------------------------------------------------------------------------------------------------------------------------------------------------------------------------------------------------------------------------------------------------------------------------------------------------------------------------------------------------------------------------------------------------------------------------------------------------------------------------------------------------------------------------------------------------------------------------------------------------------------------------------------------------------------------------------------------------------------------------------------------------------------------------------------------------------------------------------------------------------------------------------------------------------------------------------------------------------------------------------------------------------------------------------------------------------------------------------------------------------------------------------------------------------------------------------------------------------------------------------|
|  |  |  | <p> 2,CASP8,TAF4B,PSMA3,PQBP1,PSMD3,AIFM2,PSPC1,CEP350,MAD2L2,MRRF,POLDIP2,PSMC3,ZBTB40,NAA11,TIMM44,DHX38,ADNP2,GART,NT5C3A,MS4A4A,NOP16,ARID2,DDX23,PATZ1,TRNT1,MNS1,RNPS1,MTCH2,ALMS1,LHX4,ZNF512B,RBL1,PPP3R1,SLC25A46,SYPL1,HIF1AN,USP11,SS18L1,RBM45,MED29,NOSIP,PAFAH1B1,STAG1,HNRNPH1,USP14,RAB7A,LIMD1,ZNF512,DNMT1,LYL1,NAA20,BICD1,PPP5C,BAP1,JRK,ANAPC7,SUB1,GTTF2H1,DHX16,BUB3,TOP2B,LYAR,LRWD1,THOP1,CCNH,NAB2,CCT6A,KAT7,TPP2,CLTC,EEF2,AFG3L2,MSRA,AURKAIP1,SNHG20,NIPA2,WDR5,CCT8,KIF5B,TMEM43,RTL10,FUBP3,IMP4,SNHG17,BCCIP,SPRY2,DLAT,FAM120A,NOB1,SBF1,RNF40,CUL3,ARPP19,CMPK1,NONO,MEF2C,TCF3,NUP160,TEX15,MAF1,GID8,CLSPN,NOL9,MVK,NBAS,PLK4,CCNY,SLK,ZFYVE26,PRPF6,ZC3H4,TMEM33,PEBP1,ZNF26,ZNF24,PEPD,GRSF1,NXF1,UBQLN4,ACTR8,FAHD1,PSMC5,AGPAT3,STK35,TIMM23,ZC3HAV1,CAPZA1,HNRNPA3,MAPK1,STAR,ZNRF1,EEF1D,CASP3,POLR1E,ATP2A2,IPO9,PKP3,ABT1,SURF4,PCLAF,WDR36,PDSS1,CERS2,DHX33,STRIP1,PGAM5,LETM1,CTR9,NCOA5,FADS1,ZFP91,SDAD1,DHX15,UIMC1,PUM1,NEMP1,MTOR,DHX30,PDPR,RPRD2,UTP18,IKZF3,KANSL1,CPSF3,SPEN,LCLAT1,GOT2,VDAC1,SMARCA5,SNX8,CWC25,SF3A2,H2AW,ZNF45,RSF1,TFAP4,NAA50,PTP4A2,DELE1,PRMT6,TSPYL5,KPNA4,NIFK,FAF1,HNRNPA0,BAG6,EMD,ZNF131,PCYT1A,SBNO1,TASOR2,ZNF431,FKBP15,NAP1L4,DHFR,MTDH,MCOLN3,BAIAP2,COMMD4,HSPA9,MCCC1,TCF7L2,ZNF239,SRRM2,NSDHL,MRPL15,PRAME,ASCC3,UROD,SLC29A2,UBE2L3,THOC1,PSMC2,MCMBP,SETMAR,RPTOR,MRPL45,PPIL2,PPP1R10,MRPS35,HECTD1,TMEM18,CSTF2,TNF,RAVER1,GRPEL1,PPP4R3A,SAMSN1,WDR33,NIP7,PPP2R5A,TRMT61A,IGF2BP3,NO17,PDZD7,MED28,ELL2,FAM71F2,PUM2,H2AZ2,HAT1,MCRIP2,CLTA,WDR3,SSBP3,SNRPA,ZNF586,BACH1,DDX10,PDZD8,RBM10,CERT1,SETX,NFILZ,AP3D1,NAPA,PSMG2,STK24,METT18,APEX1,BPTF,ATP6V1G1,UFC1,EDC4,ICE1,RIOK2,NAA15,ARID1A,NUP43,AMMECR1,TRAM1,PITHD1,SPECC1,PPP1CC,CAVIN2,ZC3H14,B4GALT5,CDC27,HERC2,RAB35,SRSF10,C1TSL,AKAP8,SBDS,RCC1,C1QBP,VPS72,PPM1H,ZNF587B,CRK,TICRR,MED15,EOGT,STK25,CAPNS1,SRSF8,WDR74,PAK2,ARHGAP21,PRPF4,KTN1,PRMT5,SNX9,PCBP2,PTDSS1,ADD1,TRMT6,RBMX,RNF126,TMEM223,BAZ1A,DPYS,GPX4,YJU2,WDR70,MCCC2,SLC25A3,MLLT3,OPA3,ALG8,RAD23B,VAT1,TAFA4,RBM14,RBM8A,KDM3B,BOP1,GOLM1,SETD2,ZNF326,API5,INTS13,RPIA,BTBD1,TUBB,FEN1,CHAF1A,ZNF282,DYRK1A,PHF3,TFDP2,CASD1,WDR12,URB2,GTTF3C6,SLBP,CUL4A,DNAJC8,JADE2,NUCKS1,SDCBP,PSMD1,UTP25,TMPO,NUP188,NUP50,PRPF38A,SSB,CDC37,AGPAT5,GNL3L,DNTTIP2,CYB5B,IBA57,RILP,RNU6-322P,NSRP1,TFIP11,KCTD15,STRBP,PSMB2,WAC,ADI1,BSN,ARHGEF2,BRCA2,RANBP1,POLR2D,ZDHHC5,WTAP,COPS2,NIN,BCL7B,RBM42,ZFX,ZC3H7B,ACLY,SNRPD1,SLC12A9,MED13L,PAF1,ZC3H18,BIRC6,ERMAP,FASTKD2,RABL6,PHB2,TCOF1,LRRC41,TOMM22,RAP1GAP2,XRCC2,PDS5A,BRCC3,ZNF75A,SMARCB1,CREBBP,EXOSC3,WBP11,KIFC3,AHSA1,COPS3,UBE4B,INSIG1,TMX2,NUP98,HNRNPUL1,CNOT1,CUTA,LYN,ASH1L,LRRC59,GEMIN5,PHACTR2,PLAGL2,APC,BTF3,POLR1B,JPT2,DDX42,CAPN1,ELOF1,WDR6,NFYC,SF1,PELP1,SLC12A2,XRN2,TMEM201,EZR,TRUB2,DDX20,URM1,DDX51,MMS19,SGPP2,ELOA,TAF9 </p> |
|--|--|--|----------------------------------------------------------------------------------------------------------------------------------------------------------------------------------------------------------------------------------------------------------------------------------------------------------------------------------------------------------------------------------------------------------------------------------------------------------------------------------------------------------------------------------------------------------------------------------------------------------------------------------------------------------------------------------------------------------------------------------------------------------------------------------------------------------------------------------------------------------------------------------------------------------------------------------------------------------------------------------------------------------------------------------------------------------------------------------------------------------------------------------------------------------------------------------------------------------------------------------------------------------------------------------------------------------------------------------------------------------------------------------------------------------------------------------------------------------------------------------------------------------------------------------------------------------------------------------------------------------------------------------------------------------------------------------------------------------------------------------------------------------------------------------------------------------------------------------------------------------------------------------------------------------------------------------------------------------------------------------------------------------------------------------------------------------------------------------------------------------------------------------------------------------------------------------------------------------------------------------------------------------------------------------------------------------------------------------------------------------------------------------------------------------------------------------------------------------------------------------------------------------------------------------------------------------------------------------------------------------------------------------------------------------------------------------------------------------------------------------------------------------------------------------------------------------------------------------------------------------|



|  |  |  |                                                                                                                                                                                                                                                                                                                                                                                                                                                                                                                                                                                                                                                                                                                                                                                                                                                                                                                                                                                                                                                                                                                                                                                                                                                                                                                                                                                                                                                                                                                                                                                                                                                                                                                                                                                                                                                                                                                                                                                                                                                                                                                                                                                                                                                                                                                                                                                                                                                                                                                                                                                                                                                                                                                                                                                                                                                                                                                                                                                                                                                                                                                                                                                                                                                                                                                                                                                                                                                                                                                                                                                            |
|--|--|--|--------------------------------------------------------------------------------------------------------------------------------------------------------------------------------------------------------------------------------------------------------------------------------------------------------------------------------------------------------------------------------------------------------------------------------------------------------------------------------------------------------------------------------------------------------------------------------------------------------------------------------------------------------------------------------------------------------------------------------------------------------------------------------------------------------------------------------------------------------------------------------------------------------------------------------------------------------------------------------------------------------------------------------------------------------------------------------------------------------------------------------------------------------------------------------------------------------------------------------------------------------------------------------------------------------------------------------------------------------------------------------------------------------------------------------------------------------------------------------------------------------------------------------------------------------------------------------------------------------------------------------------------------------------------------------------------------------------------------------------------------------------------------------------------------------------------------------------------------------------------------------------------------------------------------------------------------------------------------------------------------------------------------------------------------------------------------------------------------------------------------------------------------------------------------------------------------------------------------------------------------------------------------------------------------------------------------------------------------------------------------------------------------------------------------------------------------------------------------------------------------------------------------------------------------------------------------------------------------------------------------------------------------------------------------------------------------------------------------------------------------------------------------------------------------------------------------------------------------------------------------------------------------------------------------------------------------------------------------------------------------------------------------------------------------------------------------------------------------------------------------------------------------------------------------------------------------------------------------------------------------------------------------------------------------------------------------------------------------------------------------------------------------------------------------------------------------------------------------------------------------------------------------------------------------------------------------------------------|
|  |  |  | , ACAT2, YWHAG, ELAVL1, UTP15, VCP, DNAJB12, WASH<br>C5, RYBP, SAFB2, GBP2, PSIP1, CSTB, CSNK1G2, DCAF<br>13, BEX4, RBM12, STIP1, CDK4, DVL2, PNO1, POLR3C,<br>THG1L, MRPS2, RBM25, SETD1A, RRP12, SCAP, WDR82,<br>SMC1A, AGO2, E2F4, TJP1, VPS26A, FOXRED2, G3BP1,<br>PCM1, RNF220, TBC1D14, GNL2, SAE1, RRP36, MCM6, A<br>QR, DHCR7, CLCN6, ARL8B, DDX18, IER3, IGF2R, ATP6<br>V0D1, ADNP, UBA2, NFKB1, UBTf, ZNF622, ARHGDI A, B<br>RD2, CHD7, RBM15B, DOK3, USP37, HNRNPA1, GAR1, RR<br>S1, PPARGC1B, MAGOH, PBRM1, CTCF, RANBP10, HHEX,<br>ANKRD17, HNRNPR, RRM2, RRM1, PI4KA, SEC24B, ELF1<br>, ZNF614, NSD1, RSL1D1, CCT3, CDK7, H3-<br>3B, RNF138, SETD1B, PPIF, PKM, FOXK2, KIF2A, HMGB<br>1, ATAD3B, MAEA, SMARCD1, GNAQ, CANX, YY1, NOL8, M<br>LLT10, IRAK1, PUS7, PIK3C2B, IP6K1, NAT10, TRMT1<br>0C, SNU13, SRSF6, EP400, AASDHPT, MTHFD1, ADSS2<br>, SART1, CEBPZ, MECP2, CSDE1, MBNL1, SKI, PRKAR2B<br>, TKT, DDX54, AZIN1, TARDBP, XRCC6, PNN, RPL22, AB<br>I1, PCNA, CDC25A, MBD1, CSNK2A2, UPF2, DIAPH1, DD<br>X3X, IQGAP2, IDI1, TNPO2, SACS, LBR, HDGF, NDC1, N<br>CAPH, ZNF789, VPS35, ATP5MC3, MCM2, JUND, CFL1, P<br>FAS, HCFC1, CHEK1, AATF, CLN6, ECSIT, ZMPSTE24, U<br>BAP2, PRMT7, OXCT1, RETREG2, SLC25A5, ARPC4, SLT<br>M, CYP3A5, URB1, VAC14, POM121, CHAMP1, DNAJC21,<br>UBP1, POLE, TRRAP, NUDC, EXOSC9, CSK, POLR2A, CCD<br>C86, DNAJC7, DNAJA1, TEX261, SUMO3, NUP62, DYNC1<br>H1, TSR1, RBM19, XPO1, PPIA, PRPF3, IK, CLCN7, PHA<br>CTR1, SERPINE1, TPR, ENC1, SRSF7, UTP20, TGFBRAP<br>1, ZFP36L2, SF3B4, STK17A, PPRC1, EBNA1BP2, ZFR,<br>ARFGAP2, KEAP1, TFB2M, UBE2N, BAZ1B, NR1P1, MACO<br>1, MRTO4, VAPA, TLK1, TEX10, GFM1, MYBBP1A, DDB1,<br>BACH2, PSMG1, PITX1, GTF3C4, NASP, ASXL2, CHST3,<br>TCP1, CENPF, YWHAB, RALY, ENO1, CCT5, FUBP1, POLE<br>3, CDK6, CDC5L, CHD3, ST3GAL2, NUP153, RAN, BEND3<br>, C19ORF48, UBC, WDR81, ZNF787, TFAM, HSPA4, AK2,<br>PPP2CA, SSU72, MSH2, CDK12, ZBTB2, DIDO1, GLYR1,<br>MAN2A2, KMT2A, MCM3, NOSTRIN, GRWD1, TOMM40, PAI<br>CS, H4C8, SLC30A10, CERS6, PRDX1, TNPO1, SNHG3, G<br>ATAD2A, DKC1, DDX1, H2BC12, STX3, CUL1, LTBR, THU<br>MPD1, EWSR1, DDX49, CASC3, SSRP1, ARID1B, KPNB1,<br>CPSF7, RRP1, TXNRD1, ZNF33B, ATP6V0A1, HNRNPAB,<br>KAT6A, ATAD3A, ARF6, USP36, RBBP4, CNPPD1, SAFB,<br>NCBP1, HEATR1, CCT2, HSP90AB1, EIF3B, PA2G4, HNR<br>NPK, SMG1, TXNL1, DHX37, FDFT1, PRPF19, SMARCA4,<br>PRKDC, YES1, ZNF121, TRA2B, PRMT1, HNRNPC, MALT1<br>, WWP2, SF3A3, SUPT16H, HMGA1, CELF1, NCLN, RBMXL<br>1, XRCC5, DDX5, PSME3, TMEM97, ANK1, UTP4, DEK, LM<br>O2, LMNB1, DDX46, LSS, EIF4A3, NDST1, NUP214, TRI<br>P12, IPO7, ACTG1, SURF6, DDX39A, DDX56, SLC38A1,<br>CI21, CDT1, UBAP2L, NOP56, HNRNPDL, CORO1C, KHDR<br>BS1, HNRNPD, RAPGEF1, LRPPRC, EIF5A, CTDSP1, SUP<br>T6H, RANBP2, DNAJB6, NOLC1, SNRNP200, SREBF2, CB<br>FA2T3, STXBP5, ABCF1, DANC, ACACA, TFAA2, MGA, N<br>SUN2, AP5Z1, HSPD1, GAPDH, YBX1, LIN28B, EIF5B, P<br>CYT2, ATP6V1C1, RBM3, STARD7, PGD, SF3A1, LMNB2,<br>AXIN1, MS4A3, MPHOSPH10, GDI2, PES1, ANP32B, MYH<br>10, IPO5, RREB1, HSPH1, EP300, TGFB1, DAZAP1, AL<br>YREF, STMN1, RRP1B, FOSB, PPM1G, STON2, SRRT, PAB<br>PC1, SERBP1, ATP13A3, AHNK, PRPF8, COA7, SF3B3,<br>PTMA, FTL, THRAP3, MLLT1, ELOVL6, HNRNPF, MT-<br>ND1, NPM1, RIF1, CITED2, SON, WDR43, TFRC, RUNX1,<br>EIF4G1, TRIM28, ACP5, U2AF2, NR2F2, BCLAF1, ECPA<br>S, SRSF2, HSP90AA1, MDN1, NFATC3, ZNF521, TRMT1,<br>SQLE, MCM4, TRIM24, NOP58, RESF1, HNRNPA2B1, KIF<br>1A, SPN, BAG1, SQSTM1, HBZ, PTBP1, CCAR1, DDX21, S<br>FPQ, PTGER3, SCD, PABPC4, HNRNPM, POLR1A, SRSF3, |
|--|--|--|--------------------------------------------------------------------------------------------------------------------------------------------------------------------------------------------------------------------------------------------------------------------------------------------------------------------------------------------------------------------------------------------------------------------------------------------------------------------------------------------------------------------------------------------------------------------------------------------------------------------------------------------------------------------------------------------------------------------------------------------------------------------------------------------------------------------------------------------------------------------------------------------------------------------------------------------------------------------------------------------------------------------------------------------------------------------------------------------------------------------------------------------------------------------------------------------------------------------------------------------------------------------------------------------------------------------------------------------------------------------------------------------------------------------------------------------------------------------------------------------------------------------------------------------------------------------------------------------------------------------------------------------------------------------------------------------------------------------------------------------------------------------------------------------------------------------------------------------------------------------------------------------------------------------------------------------------------------------------------------------------------------------------------------------------------------------------------------------------------------------------------------------------------------------------------------------------------------------------------------------------------------------------------------------------------------------------------------------------------------------------------------------------------------------------------------------------------------------------------------------------------------------------------------------------------------------------------------------------------------------------------------------------------------------------------------------------------------------------------------------------------------------------------------------------------------------------------------------------------------------------------------------------------------------------------------------------------------------------------------------------------------------------------------------------------------------------------------------------------------------------------------------------------------------------------------------------------------------------------------------------------------------------------------------------------------------------------------------------------------------------------------------------------------------------------------------------------------------------------------------------------------------------------------------------------------------------------------------|

|            |                         |                        |                                                                                                                                                                                                                                                                                                                                                                                                                                                                                                                                                                                                                                                                                                                                                                                                                                                                                                                                                                                                                                                                                                                                                                                                                                                                                                                                                                                                                                                                                                                                                                                                                                                                                                                                                                                                                                                                                                                                                                                                                                                                                                                                                                                                                                                                                                                                                                                                                                                                                                                                                                                                                                                                                                                                                                                                                                                                                                                                                                                                                                                                                                           |
|------------|-------------------------|------------------------|-----------------------------------------------------------------------------------------------------------------------------------------------------------------------------------------------------------------------------------------------------------------------------------------------------------------------------------------------------------------------------------------------------------------------------------------------------------------------------------------------------------------------------------------------------------------------------------------------------------------------------------------------------------------------------------------------------------------------------------------------------------------------------------------------------------------------------------------------------------------------------------------------------------------------------------------------------------------------------------------------------------------------------------------------------------------------------------------------------------------------------------------------------------------------------------------------------------------------------------------------------------------------------------------------------------------------------------------------------------------------------------------------------------------------------------------------------------------------------------------------------------------------------------------------------------------------------------------------------------------------------------------------------------------------------------------------------------------------------------------------------------------------------------------------------------------------------------------------------------------------------------------------------------------------------------------------------------------------------------------------------------------------------------------------------------------------------------------------------------------------------------------------------------------------------------------------------------------------------------------------------------------------------------------------------------------------------------------------------------------------------------------------------------------------------------------------------------------------------------------------------------------------------------------------------------------------------------------------------------------------------------------------------------------------------------------------------------------------------------------------------------------------------------------------------------------------------------------------------------------------------------------------------------------------------------------------------------------------------------------------------------------------------------------------------------------------------------------------------------|
|            |                         |                        | ANKRD11, EIF3A, MCM7, SMARCC1, MYC, SET, VGF, BTG1, MT-CYB, IGF2BP1, FOS, HMGCR, MYB, KHSRP, ZEB2, FUS, ILF3, FASN, GLUL, ACTB, DHX9, HNRNPU, MCM5, NCL, EGR1, DHCR24, HSPA8, FTH1                                                                                                                                                                                                                                                                                                                                                                                                                                                                                                                                                                                                                                                                                                                                                                                                                                                                                                                                                                                                                                                                                                                                                                                                                                                                                                                                                                                                                                                                                                                                                                                                                                                                                                                                                                                                                                                                                                                                                                                                                                                                                                                                                                                                                                                                                                                                                                                                                                                                                                                                                                                                                                                                                                                                                                                                                                                                                                                        |
| GO:0043229 | intracellular organelle | 1.4110597771612032e-51 | HRAS, NOP14, CENPN, TXK, ACSF3, DSG2, SNRNPB, TMEM127, MITF, PPP6C, JMJD1C, MIS18BP1, DAP3, RBM48, TOMM5, PPAN, MSH3, TRIP13, CHTOP, ERAL1, ZNF274, SEC23IP, ABRAXAS2, GYG1, PRPF38B, KMT2B, AFF1, MMAB, SUPT7L, AP5M1, SREK1, MACROH2A1, BRD9, MED16, FADS2, MUS81, NOL11, ITFG2, BICRA, MTA2, SNHG6, TIRAP, RAD51C, NRROS, AAMP, MIX23, UTP3, CWC22, CPNE7, POLR3E, UBE2Q1, NEU1, DCAF7, MTREX, RIOX1, PHF5A, NACA, POLR1C, MED6, SRP72, TRIM35, CBX3, PHB, METTL3, EZH2, SNX17, TOMM70, TCF20, FES, CCD C78, RAB10, DCLRE1C, NOC4L, RFW3, MFAP1, ULK3, DNM1L, PAXIP1, LRRFIP1, GPATCH3, RHEB, ASAP1, INTS6, PPP6R3, H4C5, FUT8, NCAPH2, SMG5, IFRD2, BRD4, STT3A, PTDSS2, DHDDS, VKORC1L1, TIMM17A, RRP9, MRPL1, ZNF581, SPIN4, ZNF74, MRPL11, AHCTF1, RPU SD4, CHCHD3, RNASEH2C, HROB, ANKRD13A, MRPS30, C TDP1, NUP155, MED1, NVL, POM121C, KIF26B, HNRNPL, NLN, MYO16, PWP1, ATP11A, DOLPP1, WDR46, MCM10, OXA1L, EFTUD2, CHAC1, EML4, CRCP, RANBP3, FRMD8, KMT2D, STAG2, CASP8, TAF4B, PSMA3, PQBP1, PSMD3, AIFM2, PSPC1, CEP350, MAD2L2, MRRF, POLDIP2, PS MC3, ZBTB40, NAA11, TIMM44, DHX38, ADNP2, NT5C3A, MS4A4A, NOP16, ARID2, DDX23, PATZ1, TRNT1, MNS1, RNPS1, MTCH2, ALMS1, LHX4, ZNF512B, RBL1, PPP3R1, SLC25A46, SYPL1, HIF1AN, USP11, SS18L1, RBM45, MED29, NOSIP, PAFAH1B1, STAG1, HNRNPH1, USP14, RAB7A, LIMD1, ZNF512, DNMT1, LYL1, NAA20, BICD1, PPP5C, BAP1, JNK, ANAPC7, SUB1, GTF2H1, DHX16, BUB3, TOP2B, LYAR, LRWD1, THOP1, CCNH, NAB2, EXOC7, CCT6A, KAT7, TPP2, CLTC, EEF2, AFG3L2, MSRA, AURK AIP1, SNHG20, NIPA2, WDR5, CCT8, KIF5B, TMEM43, R TL10, FUBP3, IMP4, SNHG17, BCCIP, SPRY2, DLAT, FAM120A, NOB1, SBF1, RNF40, CUL3, ARPP19, CMPK1, NO NO, MEF2C, TCF3, NUP160, TEX15, MAF1, GID8, CLSPN, NOL9, MVK, NBAS, PLK4, CCNY, ZFYVE26, PRPF6, ZC3H4, TMEM33, PEBP1, ZNF26, ZNF24, GRSF1, NXF1, UBQLN4, ACTR8, FAHD1, PSMC5, AGPAT3, STK35, TIMM23, ZC3HAV1, CAPZA1, HNRNPA3, MAPK1, STAR, ZNRF1, EEF1D, CASP3, POLR1E, ATP2A2, IPO9, PKP3, ABT1, SURF4, PCLAF, WDR36, PDSS1, CERS2, DHX33, STRIP1, PGAM5, LETM1, CTR9, NCOA5, FADS1, ZFP91, SDAD1, TBCD, DHX15, UIMC1, PUM1, NEMP1, MTOR, DHX30, PDPR, RPRD2, UTP18, IKZF3, KANSL1, CPSF3, SPEN, LCLAT1, GOT2, VDAC1, SMARCA5, SNX8, CWC25, SF3A2, H2AW, ZNF45, RSF1, TFAP4, NAA50, PTP4A2, CLDN11, DELE1, PRMT6, TSPYL5, KPNA4, NIFK, FAF1, HNRNPA0, BAG6, EMD, ZNF131, PCYT1A, SBNO1, TASOR2, ZNF431, FKBP15, NAP1L4, DHFR, MTDH, MCOLN3, BAIAP2, COMMD4, HSPA9, MCCC1, TCF7L2, ZNF239, SRRM2, NSDHL, MRPL15, PRAME, ASCC3, UROD, SLC29A2, UBE2L3, THOC1, PS MC2, MCMBP, SETMAR, RPTOR, MRPL45, PPIL2, PPP1R10, MRPS35, HECTD1, TMEM18, CSTF2, TNF, RAVER1, GRPEL1, PPP4R3A, SAMSN1, WDR33, NIP7, PPP2R5A, TRMT61A, IGF2BP3, NOL7, PDCD7, MED28, ELL2, FAM71F2, PUM2, H2AZ2, HAT1, MCRIP2, CLTA, WDR3, SSBP3, SNRPA, ZNF586, BACH1, DDX10, PDZD8, RBM10, CERT1, SETX, NFILZ, AP3D1, PSMG2, STK24, METTL8, APEX1, BPTF, ATP6V1G1, EDC4, ICE1, RIOK2, NAA15, ARID1A, NUP43, AMMECR1, TRAM1, PITHD1, SPECC1, PPP1CC, CAVIN2, ZC3H14, B4GALT5, CDC27, HERC2, RAB35, SRSF10, CTSL, AKAP8, SBDS, RCC1, C1QBP, VPS72, PPM1H |

|  |  |  |                                                                                                                                                                                                                                                                                                                                                                                                                                                                                                                                                                                                                                                                                                                                                                                                                                                                                                                                                                                                                                                                                                                                                                                                                                                                                                                                                                                                                                                                                                                                                                                                                                                                                                                                                                                                                                                                                                                                                                                                                                                                                                                                                                                                                                                                                                                                                                                                                                                                                                                                                                                                                                                                                                                                                                                                                                  |
|--|--|--|----------------------------------------------------------------------------------------------------------------------------------------------------------------------------------------------------------------------------------------------------------------------------------------------------------------------------------------------------------------------------------------------------------------------------------------------------------------------------------------------------------------------------------------------------------------------------------------------------------------------------------------------------------------------------------------------------------------------------------------------------------------------------------------------------------------------------------------------------------------------------------------------------------------------------------------------------------------------------------------------------------------------------------------------------------------------------------------------------------------------------------------------------------------------------------------------------------------------------------------------------------------------------------------------------------------------------------------------------------------------------------------------------------------------------------------------------------------------------------------------------------------------------------------------------------------------------------------------------------------------------------------------------------------------------------------------------------------------------------------------------------------------------------------------------------------------------------------------------------------------------------------------------------------------------------------------------------------------------------------------------------------------------------------------------------------------------------------------------------------------------------------------------------------------------------------------------------------------------------------------------------------------------------------------------------------------------------------------------------------------------------------------------------------------------------------------------------------------------------------------------------------------------------------------------------------------------------------------------------------------------------------------------------------------------------------------------------------------------------------------------------------------------------------------------------------------------------|
|  |  |  | <p>,ZNF587B,CRK,TICRR,MED15,EOGT,STK25,SRSF8,WDR74,PAK2,ARHGAP21,PRPF4,KTN1,PRMT5,SNX9,PCBP2,PTDSS1,ADD1,TRMT6,RBMX,RNF126,TMEM223,BAZ1A,GPX4,YJU2,WDR70,MCCC2,SLC25A3,MLLT3,OPA3,ALG8,RAD23B,VAT1,TAF4,RBM14,RBM8A,ARHGAP6,KDM3B,BOP1,GOLM1,LRP8,SETD2,ZNF326,API5,INTS13,RPIA,BTBD1,TUBB,FEN1,CHAF1A,ZNF282,DYRK1A,PHF3,TFDP2,CASD1,WDR12,URB2,GTFC6,SLBP,CUL4A,DNAJC8,JADE2,NUCKS1,SDCBP,PSMD1,UTP25,TMPO,NUP188,NUP50,PRPF38A,SSB,AGPAT5,GNL3L,DNTTIP2,CYB5B,IBA57,RILP,RNU6-</p> <p>322P,NSRP1,TFIP11,KCTD15,STRBP,PSMB2,WAC,A</p> <p>DI1,BSN,DHX29,ARHGEF2,BRCA2,RANBP1,POLR2D,ZDHHC5,WTAP,COPS2,NIN,BCL7B,RBM42,ZFX,ZC3H7B,ACLY,SNRPD1,PAN3,MED13L,PAF1,ZC3H18,BIRC6,ERMAP,FASTKD2,RABL6,PHB2,TCOF1,LRRC41,TOMM22,RAP1GAP2,XRCC2,PDS5A,BRCC3,ZNF75A,SMARCB1,CREBBP,EXOSC3,WBP11,KIFC3,AHSA1,COPS3,UBE4B,INSIG1,LSM14A,ABLIM1,TMX2,NUP98,HNRNPUL1,CNOT1,LYN,ASH1L,LRRC59,GEMIN5,PHACTR2,PLAGL2,APC,BTF3,POLR1B,JPT2,DDX42,CAPN1,ELOF1,WDR6,NFYC,SF1,PELP1,SLC12A2,XRN2,TMEM201,EZR,TRUB2,DDX20,URM1,DDX51,MMS19,SGP2,ELOA,TAF9,ACAT2,ELAVL1,UTP15,VCP,DNAJB12,WASHC5,RYPB,SAFB2,GBP2,PSIP1,CSTB,CSNK1G2,DCAF13,BEX4,RBM12,STIP1,CDK4,DVL2,PNO1,POLR3C,THG1L,MRPS2,RBM25,SETD1A,RRP12,SCAP,WDR82,SMC1A,AGO2,E2F4,TJP1,VPS26A,FOXRED2,G3BP1,PCMI,RNF220,TBC1D14,GNL2,SAE1,RRP36,MCM6,AQR,DHCR7,CLCN6,ARL8B,DDX18,IER3,QSER1,IGF2R,ATP6V0D1,ADNP,UBA2,NFKB1,UBTF,ZNF622,ARHGDIA,BRD2,CHD7,RBM15B,DOK3,USP37,HNRNPA1,GAR1,RRS1,PPARGC1B,MAGOH,PBRM1,CTCF,RANBP10,HHEX,ANKRD17,HNRNPR,RRM2,RRM1,PI4KA,SEC24B,ELF1,ZNF614,NSD1,RSLL1D1,CCT3,CDK7,H3-</p> <p>3B,RNF138,SETD1B,PPIF,PKM,FOKK2,KIF2A,HMGB1,ATAD3B,MAEA,SMARCD1,GNAQ,CANX,YY1,NOL8,MLLT10,IRAK1,PUS7,PIK3C2B,IP6K1,NAT10,TRMT10C,SNU13,SRSF6,EP400,MTHFD1,ADSS2,SART1,CBPPZ,MECP2,CSDE1,PARD3,MBNL1,SKI,PRKAR2B,TKT,DDX54,AZIN1,CCDC6,TARDBP,LARP4,XRCC6,PNN,RPL22,ABI1,KLHL21,PCNA,CDC25A,MBD1,CSNK2A2,UPF2,DIAPH1,DDX3X,KIAA0753,IQGAP2,IDI1,TNPO2,SACS,LBR,HDGF,NDC1,NCAPH,ZNF789,VPS35,ATP5MC3,MCM2,JUND,CFL1,HCF1,CHEK1,AATF,CLN6,ECSIT,ZMPSTE24,UBAP2,PRMT7,OXCT1,RETRG2,SLC25A5,ARPC4,SLTM,CYP3A5,URB1,VAC14,POM121,CHAMP1,DNAJC21,UBP1,POLE,TRRAP,NUDC,EXOSC9,POLR2A,CCDC86,DNAJC7,DNAJA1,TEX261,SUMO3,NUP62,DYNC1H1,TSR1,RBM19,XPO1,PPIA,PRPF3,IK,CLCN7,PHACTR1,SERPINE1,TPR,ENC1,SRSF7,UTP20,TGFBRAP1,ZFP36L2,SF3B4,STK17A,PPRC1,EBNA1BP2,ZFR,ARFGAP2,KEAP1,TFB2M,UBE2N,BAZ1B,NRIP1,MACO1,MRT04,VAPA,TLK1,TEX10,GFMI1,MYBBP1A,DDB1,BACH2,PSMG1,PITX1,GTFC4,NASP,ASXL2,CHST3,TCP1,CENPF,YWHAB,RALY,ENO1,FAM83H,CCT5,FUBP1,POLE3,CDK6,CDC5L,CHD3,ST3GAL2,NUP153,RAN,BEND3,C19ORF48,UBC,WDR81,ZNF787,TFAM,HSPA4,AK2,PPP2CA,SSU72,MSH2,CDK12,ZBTB2,DIDO1,GLYR1,MAN2A2,KMT2A,MCM3,NOSTRIN,GRWD1,TOMM40,H4C8,SLC30A10,CERS6,PRDX1,TNPO1,SNHG3,GATAD2A,DKC1,DDX1,H2BC12,STX3,CUL1,LTBR,THUMPDI,EWSR1,DDX49,CASC3,SSRP1,ARID1B,KPNB1,CPSF7,RRP1,SPTB,TXNRD1,ZN</p> |
|--|--|--|----------------------------------------------------------------------------------------------------------------------------------------------------------------------------------------------------------------------------------------------------------------------------------------------------------------------------------------------------------------------------------------------------------------------------------------------------------------------------------------------------------------------------------------------------------------------------------------------------------------------------------------------------------------------------------------------------------------------------------------------------------------------------------------------------------------------------------------------------------------------------------------------------------------------------------------------------------------------------------------------------------------------------------------------------------------------------------------------------------------------------------------------------------------------------------------------------------------------------------------------------------------------------------------------------------------------------------------------------------------------------------------------------------------------------------------------------------------------------------------------------------------------------------------------------------------------------------------------------------------------------------------------------------------------------------------------------------------------------------------------------------------------------------------------------------------------------------------------------------------------------------------------------------------------------------------------------------------------------------------------------------------------------------------------------------------------------------------------------------------------------------------------------------------------------------------------------------------------------------------------------------------------------------------------------------------------------------------------------------------------------------------------------------------------------------------------------------------------------------------------------------------------------------------------------------------------------------------------------------------------------------------------------------------------------------------------------------------------------------------------------------------------------------------------------------------------------------|

|            |                   |                        |                                                                                                                                                                                                                                                                                                                                                                                                                                                                                                                                                                                                                                                                                                                                                                                                                                                                                                                                                                                                                                                                                                                                                                                                                                                                                                                                                                                                                                                  |
|------------|-------------------|------------------------|--------------------------------------------------------------------------------------------------------------------------------------------------------------------------------------------------------------------------------------------------------------------------------------------------------------------------------------------------------------------------------------------------------------------------------------------------------------------------------------------------------------------------------------------------------------------------------------------------------------------------------------------------------------------------------------------------------------------------------------------------------------------------------------------------------------------------------------------------------------------------------------------------------------------------------------------------------------------------------------------------------------------------------------------------------------------------------------------------------------------------------------------------------------------------------------------------------------------------------------------------------------------------------------------------------------------------------------------------------------------------------------------------------------------------------------------------|
|            |                   |                        | <p>F33B,ATP6V0A1,HNRNPAB,KAT6A,ATAD3A,ARF6,USP36,RBBP4,MT-RNR2,CNPPD1,SAFB,NCBP1,HEATR1,CCT2,HSP90AB1,EIF3B,RCSD1,PA2G4,HNRNPK,SMG1,TXNL1,DHX37,FDFT1,PRPF19,SMARCA4,PRKDC,YES1,ZNF121,TRA2B,PRMT1,HNRNPC,MALT1,WWP2,SF3A3,SUPT16H,HMGA1,CELF1,NCLN,RBMXL1,XRCC5,DDX5,PSME3,TMEM97,ANK1,UTP4,DEK,LMO2,LMNB1,DDX46,LSS,EIF4A3,NDST1,NUP214,TRIP12,IPO7,ACTG1,SURF6,DDX39A,DDX56,CIZ1,CDT1,UBAP2L,NOP56,HNRNPDL,CORO1C,KHDRBS1,HNRNPD,RAPGEF1,LRPPRC,EIF5A,CTDSP1,SUPT6H,RANBP2,DNAJB6,NOLC1,SNRNP200,SREBF2,CBFA2T3,STXBP5,ABCF1,DANCR,ACACA,TAF2,MGA,NSUN2,AP5Z1,HSPD1,GAPDH,YBX1,LIN28B,EIF5B,PCYT2,ATP6V1C1,RBM3,STARD7,PGD,SF3A1,LMNB2,AXIN1,MS4A3,MPHOSPH10,GDI2,PES1,ANP32B,MYH10,IPO5,RREB1,HSPH1,EP300,TGFB1,DAZAP1,ALYREF,PCNT,STMN1,RRP1B,FOSB,PPM1G,STON2,SRRT,PABPC1,PRRC2C,SERBP1,ATP13A3,AHNAK,PRPF8,COA7,SF3B3,PTMA,FTL,THRAP3,MLLT1,ELOVL6,HNRNPF,MT-ND1,NPM1,RIF1,CITED2,SON,WDR43,TFRC,RUNX1,EIF4G1,TRIM28,ACP5,NEFH,U2AF2,NR2F2,BCLAF1,ECPAS,SRSF2,HSP90AA1,MDN1,NFATC3,ZNF521,CAPRIN1,TRMT1,SQLE,MCM4,TRIM24,NOP58,RESF1,HNRNPA2B1,KIF1A,SPN,BAG1,LARP1,SQSTM1,PTBP1,CCAR1,DDX21,SFPQ,PTGER3,SCD,PABPC4,HNRNPM,NAV1,POLR1A,SRSF3,ANKRD11,EIF3A,MCM7,SMA RCC1,MYC,SET,VGF,BTG1,MT-CYB,IGF2BP1,FOS,HMGCR,SPTA1,MYB,KHSRP,ZEB2,FUS,ILF3,FASN,GLUL,ACTB,DHX9,MT-RNR1,HNRNPU,MCM5,NCL,EGR1,DHCR24,HSPA8,FTH1</p>                                                                                                                   |
| GO:1902494 | catalytic complex | 4.1848905931753614e-47 | <p>HRAS,SNRPB,JMJD1C,KMT2B,SUPT7L,BRD9,MUS81,BICRA,MTA2,RAD51C,CWC22,POLR3E,DCAF7,MTREX,POLR1C,METTL3,EZH2,DCLRE1C,PAXIP1,SMG5,STT3A,DHDDS,RNASEH2C,NVL,EFTUD2,CHRA1,CRCP,KMT2D,CASP8,TAF4B,PSMA3,PSMD3,MAD2L2,PSMC3,NAA11,DHX38,FBXO45,ARID2,DDX23,PPP3R1,SS18L1,PAFAH1B1,HNRNPH1,USP14,NAA20,ANAPC7,GT F2H1,CCNH,KAT7,AFG3L2,WDR5,BCCIP,DLAT,RNF40,CUL3,UBR3,GID8,CCNY,PRPF6,UBQLN4,ACTR8,PSMC5,HNRNPA3,POLR1E,PDSS1,CTR9,PDPR,RPRD2,KANSL1,SMARCA5,CWC25,SF3A2,RSF1,NAA50,MCCC1,SRRM2,PRAME,ASCC3,UBE2L3,PSMC2,PPIL2,PPP1R10,RABGGTB,PPP4R3A,PPP2R5A,TRMT61A,BPTF,ATP6V1G1,NAA15,ARID1A,PPP1CC,CDC27,VPS72,CAPNS1,WDR74,PRMT5,TRMT6,RBMX,BAZ1A,YJU2,MCC2,MLLT3,RAD23B,TAF4,RBM8A,KDM3B,CUL4A,JADE2,PSMD1,GNL3L,CYB5B,TFIP11,PSMB2,BRCA2,POLR2D,WTAP,BCL7B,SNRPD1,PAF1,BRCC3,SMARCB1,CREBBP,EXOSC3,EPRS1,UBE4B,ASH1L,APC,POLR1B,PELP1,MMS19,TAF9,VCP,DCAF13,CDK4,POLR3C,THG1L,SETD1A,WDR82,AGO2,SAE1,AQR,ATP6V0D1,UBA2,RBM15B,HNRNPA1,GAR1,MAGOH,PBRM1,RANBP10,HNRNPR,RRM2,RRM1,CDK7,SETD1B,PPIF,MAEA,SMARCD1,GNAQ,YY1,PIK3C2B,NAT10,TRMT10C,EP400,SART1,PARD3,PRKAR2B,XRCC6,PNN,KLHL21,PCNA,CSNK2A2,ATP5MC3,HCFC1,VAC14,POLE,TRRAP,EXOSC9,POLR2A,DYNC1H1,TPR,ENC1,KEAP1,UBE2N,BAZ1B,NRIP1,TEX10,MYBBP1A,DDB1,RALY,ENO1,POLE3,CDK6,CDC5L,CHD3,PPP2CA,CDK12,KMT2A,MCM3,GATAD2A,DKC1,DDX1,CUL1,CASC3,ARID1B,ATP6V0A1,HNRNPAB,KAT6A,RBBP4,CNPPD1,HNRNPK,TXNL1,PRPF19,SMARCA4,PRKDC,PRMT1,HNRNPC,WWP2,SF3A3,FARSA,XRCC5,DDX5,PSME3,DEK,EIF4A3,</p> |

|            |           |                         |                                                                                                                                                                                                                                                                                                                                                                                                                                                                                                                                                                                                                                                                                                                                                                                                                                                                                                                                                                                                                                                                                                                                                                                                                                                                                                                                                                                                                                                                                                                                                                                                                                                                                                                                                                                                                                                                                                                                                                                                                                                                                                                                                                                                                                                                                                                                                                                                                                                                                                                                                                                                                                                                                                                                                                                                                                                                          |
|------------|-----------|-------------------------|--------------------------------------------------------------------------------------------------------------------------------------------------------------------------------------------------------------------------------------------------------------------------------------------------------------------------------------------------------------------------------------------------------------------------------------------------------------------------------------------------------------------------------------------------------------------------------------------------------------------------------------------------------------------------------------------------------------------------------------------------------------------------------------------------------------------------------------------------------------------------------------------------------------------------------------------------------------------------------------------------------------------------------------------------------------------------------------------------------------------------------------------------------------------------------------------------------------------------------------------------------------------------------------------------------------------------------------------------------------------------------------------------------------------------------------------------------------------------------------------------------------------------------------------------------------------------------------------------------------------------------------------------------------------------------------------------------------------------------------------------------------------------------------------------------------------------------------------------------------------------------------------------------------------------------------------------------------------------------------------------------------------------------------------------------------------------------------------------------------------------------------------------------------------------------------------------------------------------------------------------------------------------------------------------------------------------------------------------------------------------------------------------------------------------------------------------------------------------------------------------------------------------------------------------------------------------------------------------------------------------------------------------------------------------------------------------------------------------------------------------------------------------------------------------------------------------------------------------------------------------|
|            |           |                         | RANBP2,NOLC1,SNRNP200,MGA,ATP6V1C1,SF3A1,A<br>XIN1,EP300,TGFBR1,PABPC1,PRPF8,SF3B3,MLLT1<br>,ELOVL6,HNRNPF,MT-<br>ND1,ECPAS,HNRNPA2B1,MAT2A,DDX21,HNRNPM,POL<br>R1A,SMARCC1,MT-<br>CYB,GCLM,KHSRP,ACTB,DHX9,HNRNPU                                                                                                                                                                                                                                                                                                                                                                                                                                                                                                                                                                                                                                                                                                                                                                                                                                                                                                                                                                                                                                                                                                                                                                                                                                                                                                                                                                                                                                                                                                                                                                                                                                                                                                                                                                                                                                                                                                                                                                                                                                                                                                                                                                                                                                                                                                                                                                                                                                                                                                                                                                                                                                                       |
| GO:0043226 | organelle | 6.247655918<br>1553e-47 | HRAS,NOP14,CENPN,TXK,ACSF3,DSG2,SNRNPB,TMEM<br>127,MITF,PPP6C,JMJD1C,MIS18BP1,DAP3,RBM48,<br>TOMM5,PPAN,MSH3,TRIP13,CHTOP,ERAL1,ZNF274,<br>SEC23IP,ABRAXAS2,DNAJA2,GYG1,PRPF38B,KMT2B<br>,AFF1,MMAB,SUPT7L,AP5M1,SREK1,MACROH2A1,BR<br>D9,MED16,FADS2,MUS81,NOL11,ITFG2,BICRA,MTA<br>2,SNHG6,TIRAP,RAD51C,NRROS,AAMP,MIX23,UTP3<br>,CWC22,CPNE7,POLR3E,UBE2Q1,NEU1,DCAF7,MTR<br>E X,RIOX1,PHF5A,NACA,POLR1C,MED6,SRP72,TRIM3<br>5,CBX3,PHB,METTTL3,EZH2,SNX17,TOMM70,TCF20,<br>FES,CCDC78,RAB10,DCLRE1C,NOC4L,RFWD3,MFAP1<br>,ULK3,DNM1L,PAXIP1,LRRFIP1,GPATCH3,RHEB,AS<br>AP1,INTS6,PPP6R3,H4C5,FUT8,NCAPH2,SMG5,IFR<br>D2,BRD4,STT3A,PTDSS2,DHDDS,VKORC1L1,TIMM17<br>A,RRP9,MRPL1,ZNF581,SPIN4,ZNF74,MRPL11,AHC<br>TF1,RPUSD4,CMBL,CHCHD3,RNASEH2C,HROB,ANKRD<br>13A,MRPS30,CTDP1,NUP155,MED1,NVL,POM121C,K<br>IF26B,HNRNPL,NLN,MYO16,PWP1,ATP11A,DOLPP1,<br>WDR46,MCM10,OXA1L,EFTUD2,CHRA1,EML4,CRCP,<br>RANBP3,FRMD8,KMT2D,STAG2,CASP8,TAF4B,PSMA3<br>,PQBP1,PSMD3,AIFM2,PSPC1,CEP350,MAD2L2,MRR<br>F,POLDIP2,PSMC3,ZBTB40,NAA11,TIMM44,DHX38,<br>ADNP2,GART,NT5C3A,MS4A4A,NOP16,FBXO45,ARID<br>2,DDX23,PATZ1,TRNT1,MNS1,RNPS1,MTCH2,ALMS1<br>,LHX4,ZNF512B,RBL1,PPP3R1,TPRN,SLC25A46,SY<br>PL1,HIF1AN,USP11,SS18L1,RBM45,MED29,NOSIP,<br>PAFAH1B1,STAG1,HNRNPH1,USP14,RAB7A,LIMD1,Z<br>NF512,DNMT1,LYL1,NAA20,BICD1,PPP5C,BAP1,JR<br>K,ANAPC7,SUB1,GTTF2H1,DHX16,BUB3,TOP2B,LYAR<br>,LRWD1,THOP1,CCNH,NAB2,EXOC7,CCT6A,KAT7,TP<br>P2,CLTC,EEF2,AFG3L2,MSRA,AURKAIP1,SNHG20,N<br>IPA2,WDR5,CCT8,KIF5B,TMEM43,RTL10,FUBP3,IM<br>P4,SNHG17,BCCIP,SPRY2,DLAT,FAM120A,NOB1,SB<br>F1,RNF40,CUL3,ARPP19,CMPK1,NONO,MEF2C,TCF3<br>,NUP160,TEX15,MAF1,GID8,CLSPN,NOL9,MVK,NBA<br>S,PLK4,CCNY,SLK,ZFYVE26,PRPF6,ZC3H4,TMEM33<br>,PEBP1,ZNF26,ZNF24,PEPD,GRSF1,NXF1,UBQLN4,<br>ACTR8,FAHD1,PSMC5,AGPAT3,STK35,TIMM23,ZC3H<br>AV1,CAPZA1,HNRNPA3,MAPK1,STAR,ZNRF1,EEF1D,<br>CASP3,POLR1E,ATP2A2,IPO9,PKP3,ABT1,SURF4,P<br>CLAF,WDR36,PDSS1,CERS2,DHX33,STRIP1,PGAM5,<br>LETM1,CTR9,NCOA5,FADS1,ZFP91,SDAD1,TBCD,DH<br>X15,UIMC1,PUM1,NEMP1,MTOR,DHX30,PDPR,RPRD2<br>,UTP18,IKZF3,KANSL1,CPSF3,SPEN,LCLAT1,GOT2<br>,VDAC1,SMARCA5,SNX8,CWC25,SF3A2,H2AW,ZNF45<br>,RSF1,TFAP4,NAA50,PTP4A2,CLDN11,DELE1,PRMT<br>6,TSPYL5,KPNA4,NIFK,FAF1,HNRNPA0,BAG6,EMD,<br>ZNF131,PCYT1A,SBNO1,TASOR2,ZNF431,FKBP15,N<br>AP1L4,DHFR,MTDH,MCOLN3,BAIAP2,COMMD4,HSPA9<br>,MCCC1,TCF7L2,ZNF239,SRRM2,NSDHL,MRPL15,PR<br>AME,ASCC3,UROD,SLC29A2,UBE2L3,THOC1,PSMC2,<br>MCMBP,SETMAR,RPTOR,MRPL45,PPIL2,PPP1R10,MR<br>PS35,HECTD1,TMEM18,CSTF2,TNF,RAVER1,GRPEL1<br>,PPP4R3A,SAMSN1,WDR33,NIP7,PPP2R5A,TRMT61A<br>,IGF2BP3,NOL7,PDZD7,MED28,ELL2,FAM71F2,PUM<br>2,H2AZ2,HAT1,MCRIP2,CLTA,WDR3,SSBP3,SNRPA,<br>ZNF586,BACH1,DDX10,PDZD8,RBM10,CERT1,SETX,<br>NFILZ,AP3D1,NAPA,PSMG2,STK24,METTTL8,APEX1,<br>BPTF,ATP6V1G1,UFC1,EDC4,ICE1,RIOK2,NAA15,A<br>RID1A,NUP43,AMMECR1,TRAM1,PITHD1,SPECC1,PP |

|  |  |  |                                                                                                                                                                                                                                                                                                                                                                                                                                                                                                                                                                                                                                                                                                                                                                                                                                                                                                                                                                                                                                                                                                                                                                                                                                                                                                                                                                                                                                                                                                                                                                                                                                                                                                                                                                                                                                                                                                                                                                                                                                                                                                                                                                                                                                                                                                                                                                                                                                                                                                                                                                                                                                                                                                                                                                                                                                                               |
|--|--|--|---------------------------------------------------------------------------------------------------------------------------------------------------------------------------------------------------------------------------------------------------------------------------------------------------------------------------------------------------------------------------------------------------------------------------------------------------------------------------------------------------------------------------------------------------------------------------------------------------------------------------------------------------------------------------------------------------------------------------------------------------------------------------------------------------------------------------------------------------------------------------------------------------------------------------------------------------------------------------------------------------------------------------------------------------------------------------------------------------------------------------------------------------------------------------------------------------------------------------------------------------------------------------------------------------------------------------------------------------------------------------------------------------------------------------------------------------------------------------------------------------------------------------------------------------------------------------------------------------------------------------------------------------------------------------------------------------------------------------------------------------------------------------------------------------------------------------------------------------------------------------------------------------------------------------------------------------------------------------------------------------------------------------------------------------------------------------------------------------------------------------------------------------------------------------------------------------------------------------------------------------------------------------------------------------------------------------------------------------------------------------------------------------------------------------------------------------------------------------------------------------------------------------------------------------------------------------------------------------------------------------------------------------------------------------------------------------------------------------------------------------------------------------------------------------------------------------------------------------------------|
|  |  |  | <p> P1CC,CAVIN2,ZC3H14,B4GALT5,CDC27,HERC2,RAB35,SRSF10,CTSL,AKAP8,SBDS,RCC1,C1QBP,VPS72,PPM1H,ZNF587B,CRK,TICRR,MED15,EOGT,STK25,CAPNS1,SRSF8,WDR74,PAK2,ARHGAP21,PRPF4,KTN1,PRMT5,SNX9,PCBP2,PTDSS1,ADD1,TRMT6,RBMX,RNF126,TMEM223,BAZ1A,DPYS,GPX4,YJU2,WDR70,MCCC2,SLC25A3,MLLT3,OPA3,ALG8,RAD23B,VAT1,TAF4,RBM14,RBM8A,ARHGAP6,KDM3B,BOP1,GOLM1,LRP8,SETD2,ZNF326,API5,INTS13,RPIA,BTBD1,TUBB,FEN1,CHAF1A,ZNF282,DYRK1A,PHF3,TFDP2,CASD1,WDR12,URB2,UTF3C6,SLBP,CUL4A,DNAJC8,JADE2,NUCKS1,SDCBP,PSMD1,UTP25,TPPO,NUP188,NUP50,PRPF38A,SSB,CDC37,AGPAT5,GNL3L,DNTTI P2,CYB5B,IBA57,RILP,RNU6-322P,NSRP1,TFIP11,KCTD15,STRBP,PSMB2,WAC,A DI1,BSN,DHX29,ARHGEF2,BRCA2,RANBP1,POLR2D,ZDHHC5,WTAP,COPS2,NIN,BCL7B,RBM42,ZFX,ZC3H7B,ACLY,SNRPD1,SLC12A9,PAN3,MED13L,PAF1,ZC3H18,BIRC6,ERMAP,FASTKD2,RABL6,PHB2,TCOF1,LRRC41,TOMM22,RAP1GAP2,XRCC2,PDS5A,BRCC3,ZNF75A,SMARCB1,CREBBP,EXOSC3,WBP11,KIFC3,ASHA1,COPS3,UBE4B,INSIG1,LSM14A,ABLIM1,TMX2,NUP98,HNRNPUL1,CNOT1,CUTA,LYN,ASH1L,LRRC59,GEMIN5,PHACTR2,PLAGL2,APC,BTF3,POLR1B,JPT2,DDX42,CAPN1,ELOF1,WDR6,NFYC,SF1,PELP1,SLC12A2,XRN2,TMEM201,EZR,TRUB2,DDX20,URM1,DDX51,MMS19,SGPP2,ELOA,TAF9,ACAT2,YWHAG,ELAVL1,UTP15,VCP,DNAJB12,WASHC5,RYBP,SAFB2,GBP2,PSIP1,CSTB,CSNK1G2,DCAF13,BEX4,RBM12,STIP1,CDK4,DVL2,PNO1,POLR3C,THG1L,MRPS2,RBM25,SETD1A,RRP12,SCAP,WDR82,SMC1A,AGO2,E2F4,TJP1,VPS26A,FOXRED2,G3BP1,PCM1,RNF220,TBC1D14,GNL2,SAE1,RRP36,MCM6,AQR,DHCR7,CLCN6,ARL8B,DDX18,IER3,QSER1,IGF2R,ATP6V0D1,ADNP,UBA2,NFKB1,UBTF,ZNF622,ARHGDIA,BRD2,CHD7,RBM15B,DOK3,USP37,HNRNPA1,GAR1,RRS1,PPARGC1B,MAGOH,PBRM1,CTCF,RANBP10,HHEX,ANKRD17,HNRNPR,RRM2,RRM1,PI4KA,SEC24B,ELF1,ZNF614,NSD1,RSL1D1,CCT3,CDK7,H3-3B,RNF138,SETD1B,PPIF,PKM,FOXK2,KIF2A,HMGB1,ATAD3B,MAEA,SMARCD1,GNAQ,CANX,YY1,NOL8,MLLT10,IRAK1,PUS7,PIK3C2B,IP6K1,NAT10,TRMT10C,SNU13,SRSF6,EP400,AASDHPPT,MTHFD1,ADSS2,SART1,CEBPZ,MECP2,CSDE1,PARD3,MBNL1,SKI,PRKAR2B,TKT,DDX54,AZIN1,CCDC6,TARDBP,LARP4,XRCC6,PNN,RPL22,ABI1,KLHL21,PCNA,CDC25A,MBD1,CSNK2A2,UPF2,DIAPH1,DDX3X,KIAA0753,IQGA P2,IDI1,TNPO2,SACS,LBR,HDGF,NDC1,NCAPH,ZNF789,VPS35,ATP5MC3,MCM2,JUND,CFL1,PFAS,HCFC1,CHEK1,AATF,CLN6,ECSIT,ZMPSTE24,UBAP2,PRMT7,OXCT1,RETREG2,SLC25A5,ARPC4,SLTM,CYP3A5,URB1,VAC14,POM121,CHAMP1,DNAJC21,UBP1,POL E,TRRAP,NUDC,EXOSC9,CSK,POLR2A,CCDC86,DNAJ C7,DNAJA1,TEX261,SUMO3,NUP62,DYNC1H1,TSR1,RBM19,XPO1,PPIA,PRPF3,IK,CLCN7,PHACTR1,SER PINE1,TPR,ENC1,SRSF7,UTP20,TGFBFAP1,ZFP36L2,SF3B4,STK17A,PPRC1,EBNA1BP2,ZFR,ARFGAP2,KEAP1,TFB2M,UBE2N,BAZ1B,NRIP1,MACO1,MRT04,VAPA,TLK1,TEX10,GFM1,MYBBP1A,DDB1,BACH2,PSMG1,PITX1,UTF3C4,NASP,ASXL2,CHST3,TCP1,CENPF,YWHAB,RALY,ENO1,FAM83H,CCT5,FUBP1,POLE3,CDK6,CDC5L,CHD3,ST3GAL2,NUP153,RAN,BEND3,C19ORF48,UBC,WDR81,ZNF787,TFAM,HSPA4,AK2,PP2CA,SSU72,MSH2,CDK12,ZBTB2,DIDO1,GLYR1,MAN2A2,KMT2A,MCM3,NOSTRIN,GRWD1,TOMM40,PAICS,H4C8,SLC30A10,CERS6,PRDX1,TNPO1,SNHG3,GA </p> |
|--|--|--|---------------------------------------------------------------------------------------------------------------------------------------------------------------------------------------------------------------------------------------------------------------------------------------------------------------------------------------------------------------------------------------------------------------------------------------------------------------------------------------------------------------------------------------------------------------------------------------------------------------------------------------------------------------------------------------------------------------------------------------------------------------------------------------------------------------------------------------------------------------------------------------------------------------------------------------------------------------------------------------------------------------------------------------------------------------------------------------------------------------------------------------------------------------------------------------------------------------------------------------------------------------------------------------------------------------------------------------------------------------------------------------------------------------------------------------------------------------------------------------------------------------------------------------------------------------------------------------------------------------------------------------------------------------------------------------------------------------------------------------------------------------------------------------------------------------------------------------------------------------------------------------------------------------------------------------------------------------------------------------------------------------------------------------------------------------------------------------------------------------------------------------------------------------------------------------------------------------------------------------------------------------------------------------------------------------------------------------------------------------------------------------------------------------------------------------------------------------------------------------------------------------------------------------------------------------------------------------------------------------------------------------------------------------------------------------------------------------------------------------------------------------------------------------------------------------------------------------------------------------|

|            |                                              |                      |                                                                                                                                                                                                                                                                                                                                                                                                                                                                                                                                                                                                                                                                                                                                                                                                                                                                                                                                                                                                                                                                                                                                                                                                                                                                                                                                                                                                                                                          |
|------------|----------------------------------------------|----------------------|----------------------------------------------------------------------------------------------------------------------------------------------------------------------------------------------------------------------------------------------------------------------------------------------------------------------------------------------------------------------------------------------------------------------------------------------------------------------------------------------------------------------------------------------------------------------------------------------------------------------------------------------------------------------------------------------------------------------------------------------------------------------------------------------------------------------------------------------------------------------------------------------------------------------------------------------------------------------------------------------------------------------------------------------------------------------------------------------------------------------------------------------------------------------------------------------------------------------------------------------------------------------------------------------------------------------------------------------------------------------------------------------------------------------------------------------------------|
|            |                                              |                      | <p>TAD2A,DKC1,DDX1,H2BC12,STX3,CUL1,LTBR,THUMPD1,EWSR1,DDX49,CASC3,SSRP1,ARID1B,KPNB1,CPSF7,RRP1,SPTB,TXNRD1,ZNF33B,ATP6V0A1,HNRNPAB,KAT6A,ATAD3A,ARF6,USP36,RBBP4,MT-RNR2,CNPPD1,SAFB,NCBP1,HEATR1,CCT2,HSP90AB1,EIF3B,RCSD1,PA2G4,HNRNPK,SMG1,TXNL1,DHX37,FDFT1,PRPF19,SMARCA4,PRKDC,YES1,ZNF121,TRA2B,PRMT1,HNRNPC,MALT1,WWP2,SF3A3,SUPT16H,HMGA1,CELF1,NCLN,RBMXL1,XRCC5,DDX5,PSME3,TMEM97,ANK1,UTP4,DEK,LMO2,LMNB1,DDX46,LSS,EIF4A3,NDST1,NUP214,TRIP12,IPO7,ACTG1,SURF6,DDX39A,DDX56,SLC38A1,CIZ1,CDT1,UBAP2L,NOP56,HNRNPDL,CORO1C,KHDRBS1,HNRNPD,RAPGEF1,LRPPRC,EIF5A,CTDSP1,SUPT6H,RANBP2,DNAJB6,NOLC1,SNRNP200,SREBF2,CBFA2T3,STXBP5,ABCF1,DANCR,ACACA,TAF4A2,MGA,NSUN2,AP5Z1,HSPD1,GAPDH,YBX1,LIN28B,EIF5B,PCYT2,ATP6V1C1,RBM3,STARD7,PGD,SF3A1,LMNB2,AXIN1,MS4A3,MPHOSPH10,GDI2,PES1,ANP32B,MYH10,IPO5,RREB1,HSPH1,EP300,TGFBR1,DAZAP1,ALYREF,PCNT,STMN1,RRP1B,FOSB,PPM1G,STON2,SRRT,PABPC1,PRRC2C,SERBP1,ATP13A3,AHNAK,PRPF8,COA7,SF3B3,PTMA,FTL,THRAP3,MLLT1,ELOVL6,HNRNPF,MT-ND1,NPM1,RIF1,CITED2,SON,WDR43,TFRC,RUNX1,EIF4G1,TRIM28,ACP5,NEFH,U2AF2,NR2F2,BCLAF1,ECPAS,SRSF2,HSP90AA1,MDN1,NFATC3,ZNF521,CAPRIN1,TRMT1,SQLE,MCM4,TRIM24,NOP58,RESF1,HNRNPA2B1,KIF1A,SPN,BAG1,LARP1,SQSTM1,HBZ,PTBP1,CCAR1,DDX21,SFPQ,PTGER3,SCD,PABPC4,HNRNPM,NAV1,POLR1A,SRSF3,ANKRD11,EIF3A,MCM7,SMARCC1,MYC,SET,VGF,BTG1,MT-CYB,IGF2BP1,FOS,HMGCR,SPTA1,MYB,KHSRP,ZEB2,FUS,ILF3,FASN,GLUL,ACTB,DHX9,MT-RNR1,HNRNPU,MCM5,NCL,EGR1,DHCR24,HSPA8,FTH1</p> |
| GO:0043232 | intracellular non-membrane-bounded organelle | 7.63361257448226e-47 | <p>NOP14,CENPN,MITF,JMJD1C,MIS18BP1,DAP3,PPAN,TRIP13,CHTOP,ZNF274,ABRAXAS2,SUPT7L,MACROH2A1,BRD9,MUS81,NOL11,BICRA,MTA2,SNHG6,RAD51C,AAMP,UTP3,MTREX,RIOX1,POLR1C,CBX3,EZH2,FES,CCDC78,RAB10,NOC4L,RFWD3,MFAP1,DNM1L,PAXIP1,LRRFIP1,ASAP1,INTS6,H4C5,NCAPH2,BRD4,RRP9,MRPL1,ZNF74,MRPL11,AHCTF1,RPUSD4,HR23B,MRPS30,CTDP1,MED1,NVL,KIF26B,HNRNPL,MYO16,PWP1,WDR46,MCM10,CHAC1,EML4,FRMD8,STAG2,CASP8,TAF4B,PQBP1,AIFM2,PSPC1,CEP350,MAD2L2,POLDIP2,PSMC3,NAA11,TIMM44,ADNP2,NOP16,ARID2,DDX23,MNS1,ALMS1,LHX4,RBL1,USP11,SS18L1,PAFAH1B1,STAG1,RAB7A,LIMD1,DNMT1,LYL1,BICD1,ANAPC7,SUB1,BUB3,TOP2B,LYAR,LWRD1,EXOC7,CCT6A,KAT7,CLTC,MSRA,AURKAIP1,SNHG20,WDR5,CCT8,KIF5B,FUBP3,IMP4,SNHG17,BCCIP,SPRY2,RNF40,CUL3,CMPK1,NONO,MEF2C,TCF3,NUP160,MAF1,NOL9,PLK4,ZFYVE26,ZC3H4,GRSF1,NXF1,UBQLN4,ACTR8,STK35,CAPZA1,HNRNPA3,MAPK1,EEF1D,POLR1E,ABT1,PCLAF,WDR36,DHX33,CTR9,NCOA5,ZFP91,SDAD1,TBCD,DHX15,PUM1,DHX30,UTP18,KANSL1,VDAC1,SMARCA5,H2AW,RSF1,TFAP4,NAA50,CLDN11,PRMT6,TSPYL5,NIFK,EMD,ZNF131,FKBP15,NAP1L4,MTDH,BAIAP2,HSPA9,TCF7L2,NSDHL,MRPL15,PRAME,SLC29A2,THOC1,PSMC2,SETMAR,RPTOR,PPP1R10,MRPS35,PPP4R3A,WDR33,NIP7,PPP2R5A,IGF2BP3,NOL7,MED28,PUM2,H2AZ2,HAT1,MCRI2,CLTA,WDR3,BACH1,SETX,STK24,APEX1,BPTF,EDC4,ICE1,ARID1A,NUP43,SPECC1,PPP1CC,ZC3H14,CDC27,HERC2,AKAP8,SBDS,RCC1,C1QBP,VPS72,CRK,WDR74,ARHGAP21,PRMT5,SNX9,ADD1,RBMX,BAZ</p>                                                                                             |

|            |                                           |                           |                                                                                                                                                                                                                                                                                                                                                                                                                                                                                                                                                                                                                                                                                                                                                                                                                                                                                                                                                                                                                                                                                                                                                                                                                                                                                                                                                                                                                                                                                                                                                                                                                                                                                                                                                                                                                                                                                                                                                                                                                                                                                                                                                                                                                                                                                                                                                                                                                                                                                                                                                                                                   |
|------------|-------------------------------------------|---------------------------|---------------------------------------------------------------------------------------------------------------------------------------------------------------------------------------------------------------------------------------------------------------------------------------------------------------------------------------------------------------------------------------------------------------------------------------------------------------------------------------------------------------------------------------------------------------------------------------------------------------------------------------------------------------------------------------------------------------------------------------------------------------------------------------------------------------------------------------------------------------------------------------------------------------------------------------------------------------------------------------------------------------------------------------------------------------------------------------------------------------------------------------------------------------------------------------------------------------------------------------------------------------------------------------------------------------------------------------------------------------------------------------------------------------------------------------------------------------------------------------------------------------------------------------------------------------------------------------------------------------------------------------------------------------------------------------------------------------------------------------------------------------------------------------------------------------------------------------------------------------------------------------------------------------------------------------------------------------------------------------------------------------------------------------------------------------------------------------------------------------------------------------------------------------------------------------------------------------------------------------------------------------------------------------------------------------------------------------------------------------------------------------------------------------------------------------------------------------------------------------------------------------------------------------------------------------------------------------------------|
|            |                                           |                           | <p>1A,WDR70,MLLT3,TAF4,RBM14,ARHGAP6,KDM3B,BO<br/>P1,LRP8,SETD2,BTBD1,TUBB,FEN1,CHAF1A,DYRK1<br/>A,TFDP2,WDR12,URB2,SLBP,JADE2,NUCKS1,SDCBP<br/>,PSMD1,UTP25,TMPO,SSB,AGPAT5,GNL3L,DNTTIP2<br/>,RILP,TFIP11,STRBP,BSN,DHX29,ARHGEF2,BRCA2<br/>,RANBP1,POLR2D,NIN,BCL7B,ZFX,PAN3,BIRC6,FA<br/>STKD2,RABL6,PHB2,TCOF1,RAP1GAP2,XRCC2,PDS5<br/>A,BRCC3,SMARCB1,CREBBP,EXOSC3,KIFC3,LSM14A<br/>,ABLIM1,NUP98,CNOT1,LYN,ASH1L,LRR59,APC,B<br/>TF3,POLR1B,NFYC,SF1,PELP1,XRN2,TMEM201,EZR<br/>,TRUB2,DDX20,DDX51,MMS19,ELOA,TAF9,ELAVL1,<br/>UTP15,VCP,PSIP1,CSTB,DCAF13,BEX4,STIP1,CDK<br/>4,PNO1,MRPS2,SETD1A,RRP12,WDR82,SMC1A,AGO2<br/>,E2F4,TJP1,G3BP1,PCM1,GNL2,RRP36,MCM6,ARL8<br/>B,DDX18,QSER1,ATP6V0D1,ADNP,NFKB1,UBTF,ZNF<br/>622,ARHGDIA,BRD2,CHD7,HNRNPA1,GAR1,RRS1,PB<br/>RM1,CTCF,HHEX,ANKRD17,ELF1,NSD1,RSL1D1,CCT<br/>3,CDK7,H3-<br/>3B,RNF138,SETD1B,FOXK2,KIF2A,HMGB1,MAEA,SM<br/>ARCD1,CANX,YY1,NOL8,IRAK1,IP6K1,NAT10,TRMT<br/>10C,SNU13,EP400,MECP2,CSDE1,PARD3,MBNL1,SK<br/>I,PRKAR2B,DDX54,CCDC6,TARDBP,LARP4,XRCC6,P<br/>NN,RPL22,ABI1,KLHL21,PCNA,MBD1,CSNK2A2,UPF<br/>2,DIAPH1,DDX3X,KIAA0753,IQGAP2,NDC1,NCAPH,<br/>MCM2,JUND,CFL1,HCFC1,CHEK1,AATF,CLN6,UBAP2<br/>,PRMT7,SLC25A5,ARPC4,URB1,CHAMP1,DNAJC21,U<br/>BP1,POLE,TRRAP,NUDC,EXOSC9,POLR2A,CCDC86,D<br/>NAJC7,DNAJA1,SUMO3,NUP62,DYNC1H1,TSR1,RBM1<br/>9,XPO1,IK,TPR,ENC1,UTP20,EBNA1BP2,ZFR,KEAP<br/>1,TFB2M,UBE2N,BAZ1B,NRIP1,MRT04,VAPA,TEX10<br/>,MYBBP1A,DDB1,BACH2,PITX1,NASP,TCP1,CENPF,<br/>ENO1,FAM83H,CCT5,POLE3,CDK6,CDC5L,CHD3,NUP<br/>153,RAN,BEND3,C19ORF48,TFAM,PPP2CA,MSH2,DI<br/>DO1,GLYR1,MCM3,NOSTRIN,GRWD1,H4C8,SNHG3,GA<br/>TAD2A,DKC1,DDX1,H2BC12,EWSR1,CASC3,SSRP1,A<br/>RID1B,KPNB1,RRP1,SPTB,TXNRD1,HNRNPAB,KAT6A<br/>,ATAD3A,USP36,RBBP4,MT-<br/>RNR2,HEATR1,CCT2,HSP90AB1,EIF3B,RCS1D1,PA2G<br/>4,HNRNPK,SMG1,DHX37,PRPF19,SMARCA4,PRKDC,Y<br/>ES1,HNRNPC,MALT1,SUPT16H,HMGA1,CELF1,XRCC5<br/>,DDX5,ANK1,UTP4,DEK,LMNB1,DDX46,LSS,EIF4A3<br/>,ACTG1,SURF6,DDX56,CDT1,UBAP2L,NOP56,COR01<br/>C,LRPPRC,DNAJB6,NOLC1,SREBF2,CBFA2T3,ABCF1<br/>,DANCR,ACACA,MGA,NSUN2,GAPDH,YBX1,LIN28B,R<br/>BM3,LMNB2,AXIN1,MPHOSPH10,PES1,ANP32B,MYH1<br/>0,IPO5,RREB1,HSPH1,EP300,PCNT,STMN1,RRP1B,<br/>FOSB,STON2,PABPC1,PRRC2C,AHNAK,SF3B3,MLLT1<br/>,NPM1,RIF1,CITED2,WDR43,RUNX1,EIF4G1,TRIM2<br/>8,NEFH,ECPAS,SRSF2,MDN1,NFATC3,CAPRIN1,MCM<br/>4,TRIM24,NOP58,RESF1,HNRNPA2B1,KIF1A,LARP1<br/>,SQSTM1,PTBP1,DDX21,SFPQ,SCD,PABPC4,HNRNPM<br/>,NAV1,POLR1A,EIF3A,MCM7,SMARCC1,MYC,SET,IG<br/>F2BP1,FOS,SPTA1,KHSRP,ZEB2,FUS,ILF3,ACTB,D<br/>HX9,MT-<br/>RNR1,HNRNPU,MCM5,NCL,EGR1,DHCR24,HSPA8</p> |
| GO:0043228 | non-<br>membrane-<br>bounded<br>organelle | 8.063434871<br>350523e-47 | <p>NOP14,CENPN,MITF,JMJD1C,MIS18BP1,DAP3,PPAN<br/>,TRIP13,CHTOP,ZNF274,ABRAXAS2,SUPT7L,MACRO<br/>H2A1,BRD9,MUS81,NOL11,BICRA,MTA2,SNHG6,RAD<br/>51C,AAMP,UTP3,MTRX,RIOX1,POLR1C,CBX3,EZH2<br/>,FES,CCDC78,RAB10,NOC4L,RFWD3,MFAP1,DNM1L,<br/>PAXIP1,LRRFIP1,ASAP1,INTS6,H4C5,NCAPH2,BRD<br/>4,RRP9,MRPL1,ZNF74,MRPL11,AHCTF1,RPUSD4,HR<br/>OB,MRPS30,CTDP1,MED1,NVL,KIF26B,HNRNPL,MYO<br/>16,PWP1,WDR46,MCM10,CHRA1,EML4,FRMD8,STAG<br/>2,CASP8,TAF4B,PQBP1,AIFM2,PSPC1,CEP350,MAD<br/>2L2,POLDIP2,PSMC3,NAA11,TIMM44,ADNP2,NOP16</p>                                                                                                                                                                                                                                                                                                                                                                                                                                                                                                                                                                                                                                                                                                                                                                                                                                                                                                                                                                                                                                                                                                                                                                                                                                                                                                                                                                                                                                                                                                                                                                                                                                                                                                                                                                                                                                                                                                                                                                                                                                                             |



|  |  |  |                                                                                                                                                                                                                                                                                                                                                                                                                                                                                                                                                                                                                                                                                                                                                                                                                                                                                                                                                                                                                                                                                                                                                                                                                                                                                                                                                                                                                                                                                                                                                                                                                                                                                                                                                                                                                                                                                                                                                                                                                                                                                                                                                                                                                                                                                                                                                                                                                                                                                                                                                                                                                                                                                                                                                                                                                                                                                                                                                                                                                                                                                                                                                                                                                                                                                                                    |
|--|--|--|--------------------------------------------------------------------------------------------------------------------------------------------------------------------------------------------------------------------------------------------------------------------------------------------------------------------------------------------------------------------------------------------------------------------------------------------------------------------------------------------------------------------------------------------------------------------------------------------------------------------------------------------------------------------------------------------------------------------------------------------------------------------------------------------------------------------------------------------------------------------------------------------------------------------------------------------------------------------------------------------------------------------------------------------------------------------------------------------------------------------------------------------------------------------------------------------------------------------------------------------------------------------------------------------------------------------------------------------------------------------------------------------------------------------------------------------------------------------------------------------------------------------------------------------------------------------------------------------------------------------------------------------------------------------------------------------------------------------------------------------------------------------------------------------------------------------------------------------------------------------------------------------------------------------------------------------------------------------------------------------------------------------------------------------------------------------------------------------------------------------------------------------------------------------------------------------------------------------------------------------------------------------------------------------------------------------------------------------------------------------------------------------------------------------------------------------------------------------------------------------------------------------------------------------------------------------------------------------------------------------------------------------------------------------------------------------------------------------------------------------------------------------------------------------------------------------------------------------------------------------------------------------------------------------------------------------------------------------------------------------------------------------------------------------------------------------------------------------------------------------------------------------------------------------------------------------------------------------------------------------------------------------------------------------------------------------|
|  |  |  | <p>, ARID2, DDX23, MNS1, ALMS1, LHX4, RBL1, USP11, SS18L1, PAFAH1B1, STAG1, RAB7A, LIMD1, DNMT1, LYL1, BICD1, ANAPC7, SUB1, BUB3, TOP2B, LYAR, LRWD1, EXOC7, CCT6A, KAT7, CLTC, MSRA, AURKAIP1, SNHG20, WDR5, CCT8, KIF5B, FUBP3, IMP4, SNHG17, BCCIP, SPRY2, RNF40, CUL3, CMPK1, NONO, MEF2C, TCF3, NUP160, MAF1, NOL9, PLK4, ZFYVE26, ZC3H4, GRSF1, NXF1, UBQLN4, ACTR8, STK35, CAPZA1, HNRNPA3, MAPK1, EEF1D, POLR1E, ABT1, PCLAF, WDR36, DHX33, CTR9, NCOA5, ZFP91, SDAD1, TBCD, DHX15, PUM1, DHX30, UTP18, KANSL1, VDAC1, SMARCA5, H2AW, RSF1, TFAP4, NAA50, CLDN11, PRMT6, TSPYL5, NIFK, EMD, ZNF131, FKBP15, NAP1L4, MTDH, BAIAP2, HSPA9, TCF7L2, NSDHL, MRPL15, PRAME, SLC29A2, THOC1, PSMC2, SETMAR, RPTOR, PPP1R10, MRPS35, PPP4R3A, WDR33, NIP7, PPP2R5A, IGF2BP3, NOL7, MED28, PUM2, H2AZ2, HAT1, MCRI P2, CLTA, WDR3, BACH1, SETX, STK24, APEX1, BPTF, EDC4, ICE1, ARID1A, NUP43, SPECC1, PPP1CC, ZC3H14, CDC27, HERC2, AKAP8, SBDS, RCC1, C1QBP, VPS72, CRK, WDR74, ARHGAP21, PRMT5, SNX9, ADD1, RBMX, BAZ1A, WDR70, MLLT3, TAF4, RBM14, ARHGAP6, KDM3B, BOP1, LRP8, SETD2, BTBD1, TUBB, FEN1, CHAF1A, DYRK1A, TFDP2, WDR12, URB2, SLBP, JADE2, NUCKS1, SDCBP, PSMD1, UTP25, TMPO, SSB, AGPAT5, GNL3L, DNTTIP2, RILP, TFIP11, STRBP, BSN, DHX29, ARHGEF2, BRCA2, RANBP1, POLR2D, NIN, BCL7B, ZFX, PAN3, BIRC6, FASTKD2, RABL6, PHB2, TCOF1, RAP1GAP2, XRCC2, PDS5A, BRCC3, SMARCB1, CREBBP, EXOSC3, KIFC3, LSM14A, ABLIM1, NUP98, CNOT1, LYN, ASH1L, LRRC59, APC, BTF3, POLR1B, NFYC, SF1, PELP1, XRN2, TMEM201, EZR, TRUB2, DDX20, DDX51, MMS19, ELOA, TAF9, ELAVL1, UTP15, VCP, PSIP1, CSTB, DCAF13, BEX4, STIP1, CDK4, PNO1, MRPS2, SETD1A, RRP12, WDR82, SMC1A, AGO2, E2F4, TJP1, G3BP1, PCM1, GNL2, RRP36, MCM6, ARL8B, DDX18, QSER1, ATP6V0D1, ADNP, NFKB1, UBTf, ZNF622, ARHGDIA, BRD2, CHD7, HNRNPA1, GAR1, RRS1, PB RM1, CTCF, HHEX, ANKRD17, ELF1, NSD1, RSL1D1, CCT3, CDK7, H3-3B, RNF138, SETD1B, FOXK2, KIF2A, HMGB1, MAEA, SMARCD1, CANX, YY1, NOL8, IRAK1, IP6K1, NAT10, TRMT10C, SNU13, EP400, MECP2, CSDE1, PARD3, MBNL1, SKI, PRKAR2B, DDX54, CCDC6, TARDBP, LARP4, XRCC6, PNN, RPL22, ABI1, KLHL21, PCNA, MBD1, CSNK2A2, UPF2, DIAPH1, DDX3X, KIAA0753, IQGAP2, NDC1, NCAPH, MCM2, JUND, CFL1, HCFC1, CHEK1, AATF, CLN6, UBAP2, PRMT7, SLC25A5, ARPC4, URB1, CHAMP1, DNAJC21, UBP1, POLE, TRRAP, NUDC, EXOSC9, POLR2A, CCDC86, DNAJC7, DNAJA1, SUMO3, NUP62, DYNC1H1, TSR1, RBM19, XPO1, IK, TPR, ENC1, UTP20, EBNA1BP2, ZFR, KEAP1, TFB2M, UBE2N, BAZ1B, NRIP1, MRT04, VAPA, TEX10, MYBBP1A, DDB1, BACH2, PITX1, NASP, TCP1, CENPF, ENO1, FAM83H, CCT5, POLE3, CDK6, CDC5L, CHD3, NUP153, RAN, BEND3, C19ORF48, TFAM, PPP2CA, MSH2, DI DO1, GLYR1, MCM3, NOSTRIN, GRWD1, H4C8, SNHG3, GATAD2A, DKC1, DDX1, H2BC12, EWSR1, CASC3, SSRP1, ARID1B, KPNB1, RRP1, SPTB, TXNRD1, HNRNPAB, KAT6A, ATAD3A, USP36, RBBP4, MT-RNR2, HEATR1, CCT2, HSP90AB1, EIF3B, RCSD1, PA2G4, HNRNPK, SMG1, DHX37, PRPF19, SMARCA4, PRKDC, YES1, HNRNPC, MALT1, SUPT16H, HMGA1, CELF1, XRCC5, DDX5, ANK1, UTP4, DEK, LMNB1, DDX46, LSS, EIF4A3, ACTG1, SURF6, DDX56, CDT1, UBAP2L, NOP56, CORO1C, LRPPRC, DNAJB6, NOLC1, SREBF2, CBFA2T3, ABCF1, DANCER, ACACA, MGA, NSUN2, GAPDH, YBX1, LIN28B, RBM3, LMNB2, AXIN1, MPHOSPH10, PES1, ANP32B, MYH10, IPO5, RREB1, HSPH1, EP300, PCNT, STMN1, RRP1B,</p> |
|--|--|--|--------------------------------------------------------------------------------------------------------------------------------------------------------------------------------------------------------------------------------------------------------------------------------------------------------------------------------------------------------------------------------------------------------------------------------------------------------------------------------------------------------------------------------------------------------------------------------------------------------------------------------------------------------------------------------------------------------------------------------------------------------------------------------------------------------------------------------------------------------------------------------------------------------------------------------------------------------------------------------------------------------------------------------------------------------------------------------------------------------------------------------------------------------------------------------------------------------------------------------------------------------------------------------------------------------------------------------------------------------------------------------------------------------------------------------------------------------------------------------------------------------------------------------------------------------------------------------------------------------------------------------------------------------------------------------------------------------------------------------------------------------------------------------------------------------------------------------------------------------------------------------------------------------------------------------------------------------------------------------------------------------------------------------------------------------------------------------------------------------------------------------------------------------------------------------------------------------------------------------------------------------------------------------------------------------------------------------------------------------------------------------------------------------------------------------------------------------------------------------------------------------------------------------------------------------------------------------------------------------------------------------------------------------------------------------------------------------------------------------------------------------------------------------------------------------------------------------------------------------------------------------------------------------------------------------------------------------------------------------------------------------------------------------------------------------------------------------------------------------------------------------------------------------------------------------------------------------------------------------------------------------------------------------------------------------------------|

|            |         |                           |                                                                                                                                                                                                                                                                                                                                                                                                                                                                                                                                                                                                                                                                                                                                                                                                                                                                                                                                                                                                                                                                                                                                                                                                                                                                                                                                                                                                                                                                                                                                                                                                                                                                                                                                                                                                                                                                                                                                                                                                                                                                                                                                                                                                                                                                                                                                                                                                                                                                                          |
|------------|---------|---------------------------|------------------------------------------------------------------------------------------------------------------------------------------------------------------------------------------------------------------------------------------------------------------------------------------------------------------------------------------------------------------------------------------------------------------------------------------------------------------------------------------------------------------------------------------------------------------------------------------------------------------------------------------------------------------------------------------------------------------------------------------------------------------------------------------------------------------------------------------------------------------------------------------------------------------------------------------------------------------------------------------------------------------------------------------------------------------------------------------------------------------------------------------------------------------------------------------------------------------------------------------------------------------------------------------------------------------------------------------------------------------------------------------------------------------------------------------------------------------------------------------------------------------------------------------------------------------------------------------------------------------------------------------------------------------------------------------------------------------------------------------------------------------------------------------------------------------------------------------------------------------------------------------------------------------------------------------------------------------------------------------------------------------------------------------------------------------------------------------------------------------------------------------------------------------------------------------------------------------------------------------------------------------------------------------------------------------------------------------------------------------------------------------------------------------------------------------------------------------------------------------|
|            |         |                           | <p>FOSB,STON2,PABPC1,PRRC2C,AHNAK,SF3B3,MLLT1,NPM1,RIF1,CITED2,WDR43,RUNX1,EIF4G1,TRIM28,NEFH,ECPAS,SRSF2,MDN1,NFATC3,CAPRIN1,MCM4,TRIM24,NOP58,RESF1,HNRNPA2B1,KIF1A,LARP1,SQSTM1,PTBP1,DDX21,SFPQ,SCD,PABPC4,HNRNPM,NAV1,POLR1A,EIF3A,MCM7,SMARCC1,MYC,SET,IGF2BP1,FOS,SPTA1,KHSRP,ZEB2,FUS,ILF3,ACTB,DHX9,MT-RNR1,HNRNPU,MCM5,NCL,EGR1,DHCR24,HSPA8</p>                                                                                                                                                                                                                                                                                                                                                                                                                                                                                                                                                                                                                                                                                                                                                                                                                                                                                                                                                                                                                                                                                                                                                                                                                                                                                                                                                                                                                                                                                                                                                                                                                                                                                                                                                                                                                                                                                                                                                                                                                                                                                                                               |
| GO:0005829 | cytosol | 6.849257879<br>661888e-42 | <p>HRAS,CENPN,SNRPB,PPP6C,ERAL1,SEC23IP,ABRAXAS2,DNAJA2,GYG1,AP5M1,ITFG2,TIRAP,RAD51C,AMP,CWC22,POLR3E,UBE2Q1,DCAF7,POLR1C,SRP72,SNX17,FES,RAB10,DNM1L,LRRFIP1,GPATCH3,RHEB,ASAP1,PPP6R3,SMG5,MRPL1,SPIN4,AHCTF1,CMBL,NUP155,SRM,HNRNPL,NLN,MYO16,EFTUD2,EML4,CRCP,FRMD8,STAG2,CASP8,PSMA3,PSMD3,AIFM2,AD2L2,PSMC3,NAA11,GART,NT5C3A,FBXO45,RNPS1,ALMS1,PPP3R1,HIF1AN,USP11,SS18L1,NOSIP,FAH1B1,STAG1,HNRNPH1,USP14,RAB7A,LIMD1,NAA20,BICD1,PPP5C,BAP1,ANAPC7,BUB3,GAB2,TOP2B,THOP1,EXOC7,CCT6A,KAT7,TPP2,CLTC,TSR3,EEF2,MSRA,CCT8,KIF5B,FAM13B,BCCIP,SPRY2,FAM120A,NOB1,SBF1,RNF40,CUL3,CMPK1,MEF2C,NUP160,MAF1,GID8,MVK,NBAS,PLK4,SLK,ZC3H4,PEBP1,GSP1,NXF1,UBQLN4,FAHD1,PSMC5,ZC3HAV1,CAPZA1,MAPK1,ZNRF1,EEF1D,CASP3,IPO9,TULP4,SURF4,HBG1,DHX33,STRIP1,NSMAF,PUM1,MTOR,DHX30,IKZF3,LCLAT1,SMG9,SNX8,EIF3D,NAA50,PTP4A2,ELE1,KPNA4,FAF1,BAG6,EMD,PCYT1A,TASOR2,DHFR,BAIAP2,COMMD4,MCCC1,GMPS,ASCC3,UROD,UBE2L3,PSMC2,MCMBP,RPTOR,RABGGTB,EIF4B,PPP4R3A,SAMSN1,NIP7,PPP2R5A,IGF2BP3,PUM2,CLTA,BACH1,CERT1,TRMT2A,NAPA,PSMG2,STK24,ATP6V1G1,EDC4,RIOK2,NAA15,NUP43,SPECC1,ADO,PPP1CC,CAVIN2,CDC27,HERC2,RAB35,SRSF10,SBDS,C1QBP,CRK,TICRR,CAPNS1,SRSF8,PAK2,ARHGAP21,PRMT5,SNX9,PCBP2,ADD1,RNF126,DPYS,GPX4,MCCC2,MLLT3,RAD23B,TAF4,RBM8A,ARHGAP6,RPIA,UCK2,BTBD1,TUBB,SLBP,DNAJC8,SDCBP,PSMD1,AMD1,NUP188,CDC37,ECHDC1,GNL3L,RILP,PSMB2,EIF3G,ADI1,DHX29,ARHGEF2,BRCA2,RANBP1,POLR2D,EIF3M,COPS2,ACLY,SNRPD1,PAN3,BIRC6,ERMAP,RABL6,TCOF1,LRRC41,RAP1GAP2,GRB10,PDS5A,BRCC3,CREBBP,EXOSC3,WBP11,AHSA1,EPRS1,COPS3,LSM14A,NUP98,CNOT1,LYN,GEMIN5,APC,BTF3,POLR1B,JPT2,DDX42,CAPN1,WDR6,SLC12A2,EZR,DDX20,URM1,MMS19,ACAT2,YWHAG,ELAVL1,VCP,WASHC5,GBP2,PSIP1,CSTB,CSNK1G2,DCAF13,BEX4,STIP1,CDK4,DVL2,PNO1,POLR3C,THG1L,RRP12,SMC1A,AGO2,TJP1,VPS26A,G3BP1,PCM1,TBC1D14,ARL8B,IER3,NFKB1,ZNF622,ARHGDIA,USP37,PPARGC1B,MAGOH,RANBP10,RRM2,RRM1,PI4KA,SEC24B,CCT3,CDK7,PKM,KIF2A,MLLT10,IRAK1,PIK3C2B,IP6K1,METAP2,ASDHPPT,MTHFD1,ADSS2,SART1,MECP2,CSDE1,PARD3,MBNL1,PRKAR2B,TKT,AZIN1,CCDC6,N4BP2,LARP4,XRCC6,RPL22,ABI1,KLHL21,CDC25A,CSNK2A2,UPF2,DIAPH1,DDX3X,KIAA0753,IQGAP2,IDI1,NCAPH,VPS35,EIF4G2,CFL1,PFAS,CHEK1,ECSIT,PRMT7,ARPC4,VAC14,DNAJC21,UBP1,PIP5K2,NUDC,EXOSC9,CSK,DNAJC7,DNAJA1,DYNC1H1,TSR1,XPO1,PP1A,PRPF3,PHACTR1,ARFGAP2,KEAP1,UBE2N,NRIP1,VAPA,BACH2,PSMG1,TCP1,CENPF,YWHAB,ENO1,CCIT5,CDK6,NUP153,RAN,UBC,WDR81,TFAM,HSPA4,PP2CA,SSU72,GLYR1,KMT2A,GRWD1,TOMM40,PAICS,ARMC6,PRDX1,TNPO1,DDX1,H2BC12,CUL1,CTPS1,ASC3,ARID1B,KPNB1,SPTB,TXNRD1,ATP6V0A1,KAT</p> |

|            |                                    |                           |                                                                                                                                                                                                                                                                                                                                                                                                                                                                                                                                                                                                                                                                                                                                                                                                                                                                                                                                                                                                                                                                                                                                                                                                                                                                                                                                                                                                                                                                                                                                                                                                                                                                                                                                                                                                                                                                                                                                                                                                                                                                                                                                                                                                                                                                                                                                                                                                             |
|------------|------------------------------------|---------------------------|-------------------------------------------------------------------------------------------------------------------------------------------------------------------------------------------------------------------------------------------------------------------------------------------------------------------------------------------------------------------------------------------------------------------------------------------------------------------------------------------------------------------------------------------------------------------------------------------------------------------------------------------------------------------------------------------------------------------------------------------------------------------------------------------------------------------------------------------------------------------------------------------------------------------------------------------------------------------------------------------------------------------------------------------------------------------------------------------------------------------------------------------------------------------------------------------------------------------------------------------------------------------------------------------------------------------------------------------------------------------------------------------------------------------------------------------------------------------------------------------------------------------------------------------------------------------------------------------------------------------------------------------------------------------------------------------------------------------------------------------------------------------------------------------------------------------------------------------------------------------------------------------------------------------------------------------------------------------------------------------------------------------------------------------------------------------------------------------------------------------------------------------------------------------------------------------------------------------------------------------------------------------------------------------------------------------------------------------------------------------------------------------------------------|
|            |                                    |                           | <p>6A,ARF6,USP36,RBBP4,NCBP1,CCT2,HSP90AB1,EI<br/>F3B,SMG1,TXNL1,EIF3J,PRKDC,YES1,PRMT1,HNRN<br/>PC,MALT1,WWP2,HMGA1,FARSA,XRCC5,DDX5,PSME3<br/>,ANK1,EIF4A3,NUP214,TRIP12,IPO7,ACTG1,DDX5<br/>6,HNRNPDL,KHDRBS1,HNRNPD,RAPGEF1,EIF5A,RAN<br/>BP2,DNAJB6,SREBF2,STXBP5,ABCF1,ACACA,HSPD1<br/>,GAPDH,YBX1,LIN28B,EIF5B,ATP6V1C1,PGD,AXIN<br/>1,GDI2,PES1,MYH10,HSPH1,EP300,DAZAP1,PCNT,<br/>STMN1,RRP1B,STON2,PABPC1,PRRC2C,SERBP1,AHN<br/>AK,PTMA,FTL,MLLT1,HNRNPF,NPM1,ETF1,CDV3,NQ<br/>O1,EIF4G1,ACP5,NR2F2,SRSF2,HSP90AA1,MDN1,N<br/>FATC3,CAPRIN1,TRIM24,NOP58,BAG1,LARP1,SQST<br/>M1,HBZ,MAT2A,DDX21,HMGCS1,SFPQ,PABPC4,ANKR<br/>D11,EIF3A,MCM7,SET,IGF2BP1,FOS,GCLM,SPTA1,<br/>MYB,ODC1,KHSRP,ZEB2,FASN,GLUL,ACTB,DHX9,HN<br/>RNPU,MCM5,DHCR24,HSPA8,FTH1</p>                                                                                                                                                                                                                                                                                                                                                                                                                                                                                                                                                                                                                                                                                                                                                                                                                                                                                                                                                                                                                                                                                                                                                                                                                                                                                                                                                                                                                                                                                                                                                                                                                                         |
| GO:0032991 | protein-<br>containin<br>g complex | 5.635927156<br>769828e-41 | <p>HRAS,NOP14,SNRPB,MITF,JMJD1C,DAP3,TOMM5,PP<br/>AN,MSH3,CHTOP,ABRAXAS2,PRPF38B,KMT2B,AFF1,<br/>SUPT7L,AP5M1,SREK1,MACROH2A1,BRD9,MED16,MU<br/>S81,NOL11,ITFG2,BICRA,MTA2,RAD51C,UTP3,CWC<br/>22,POLR3E,DCAF7,MTREX,OTUD6B,PHF5A,NACA,PO<br/>LR1C,MED6,SRP72,CBX3,PHB,METTL3,EZH2,SNX17<br/>,TOMM70,RAB10,DCLRE1C,NOC4L,MFAP1,DNM1L,PA<br/>XIP1,RHEB,INTS6,H4C5,NCAPH2,SMG5,STT3A,DHD<br/>DS,TIMM17A,RRP9,MRPL1,MRPL11,AHCTF1,CHCHD3<br/>,RNASEH2C,MRPS30,CTDP1,NUP155,MED1,NVL,POM<br/>121C,KIF26B,HNRNPL,MYO16,ATP11A,WDR46,MCM1<br/>0,OXA1L,EFTUD2,CHRA1,CRCP,RANBP3,KMT2D,ST<br/>AG2,CASP8,TAF4B,PSMA3,PSMD3,MAD2L2,PSMC3,N<br/>AA11,TIMM44,DHX38,FBXO45,ARID2,DDX23,RNPS1<br/>,RBL1,PPP3R1,SS18L1,RBM45,MED29,PAFAH1B1,S<br/>TAG1,HNRNPH1,USP14,RAB7A,LIMD1,LYL1,NAA20,<br/>PPP5C,BAP1,JRK,ANAPC7,SUB1,GTTF2H1,DHX16,BU<br/>B3,TOP2B,LWRD1,CCNH,EXOC7,CCT6A,KAT7,CLTC,<br/>EEF2,AFG3L2,AURKAIP1,WDR5,CCT8,KIF5B,FUBP3<br/>,IMP4,BCCIP,DLAT,NOB1,RNF40,CUL3,NONO,MEF2<br/>C,UBR3,TCF3,NUP160,GID8,NBAS,PLK4,CCNY,PRP<br/>F6,GSPT1,GRSF1,NXF1,UBQLN4,MIR17HG,ACTR8,P<br/>SMC5,TIMM23,CAPZA1,HNRNPA3,EEF1D,CASP3,POL<br/>R1E,ATP2A2,PKP3,ABT1,WDR36,HBG1,PDSS1,DHX3<br/>3,CTR9,DHX15,UIMC1,MTOR,PDPR,RPRD2,UTP18,K<br/>ANSL1,CPSF3,SPEN,VDAC1,SMARCA5,SNX8,CWC25,<br/>SF3A2,H2AW,EIF3D,RSF1,TFAP4,NAA50,KPNA4,FA<br/>F1,HNRNPA0,BAG6,HSPA9,MCCC1,TCF7L2,SRRM2,M<br/>RPL15,PRAME,ASCC3,UBE2L3,THOC1,PSMC2,MCMBP<br/>,RPTOR,PPIL2,PPP1R10,MRPS35,CSTF2,GRPEL1,R<br/>ABGGTB,EIF4B,PPP4R3A,WDR33,NIP7,PPP2R5A,TR<br/>MT61A,PDCD7,MED28,ELL2,H2AZ2,HAT1,CLTA,WDR<br/>3,SSBP3,SNRPA,BACH1,RBM10,CERT1,AP3D1,NAPA<br/>,PSMG2,APEX1,BPTF,ATP6V1G1,ICE1,RIOK2,NAA1<br/>5,ARID1A,NUP43,SPECC1,PPP1CC,KCNQ5,ZC3H14,<br/>CDC27,RCC1,VPS72,CRK,MED15,CAPNS1,WDR74,PR<br/>PF4,PRMT5,PCBP2,ADD1,TRMT6,RBMX,BAZ1A,GPX4<br/>,YJU2,MCCC2,MLLT3,RAD23B,TAF4,RBM14,RBM8A,<br/>KDM3B,BOP1,LRP8,ZNF326,API5,INTS13,BTBD1,T<br/>UBB,FEN1,CHAF1A,DYRK1A,TFDP2,WDR12,GTFF3C6,<br/>SLBP,CUL4A,JADE2,SDCBP,PSMD1,UTP25,NUP188,<br/>NUP50,PRPF38A,SSB,CDC37,GNL3L,CYB5B,RILP,R<br/>NU6-<br/>322P,NSRP1,TFIP11,PSMB2,WAC,EIF3G,DHX29,AR<br/>HGEF2,BRCA2,RANBP1,POLR2D,EIF3M,WTAP,COPS2<br/>,NIN,BCL7B,RBM42,SNRPD1,PAN3,MED13L,PAF1,Z<br/>C3H18,PHB2,TOMM22,GRB10,XRCC2,BRCC3,SMARCB<br/>1,CREBBP,EXOSC3,WBP11,KIFC3,EPRS1,COPS3,UB<br/>E4B,INSIG1,LSM14A,NUP98,HNRNPUL1,CNOT1,LYN<br/>,ASH1L,GEMIN5,APC,BTF3,POLR1B,ELOF1,WDR6,N</p> |

|            |            |                        |                                                                                                                                                                                                                                                                                                                                                                                                                                                                                                                                                                                                                                                                                                                                                                                                                                                                                                                                                                                                                                                                                                                                                                                                                                                                                                                                                                                                                                                                                                                                                                                                                                                                                                                                                                                                                                                                                                                                                                                                                                                                                                                                                                                                                                                                                                         |
|------------|------------|------------------------|---------------------------------------------------------------------------------------------------------------------------------------------------------------------------------------------------------------------------------------------------------------------------------------------------------------------------------------------------------------------------------------------------------------------------------------------------------------------------------------------------------------------------------------------------------------------------------------------------------------------------------------------------------------------------------------------------------------------------------------------------------------------------------------------------------------------------------------------------------------------------------------------------------------------------------------------------------------------------------------------------------------------------------------------------------------------------------------------------------------------------------------------------------------------------------------------------------------------------------------------------------------------------------------------------------------------------------------------------------------------------------------------------------------------------------------------------------------------------------------------------------------------------------------------------------------------------------------------------------------------------------------------------------------------------------------------------------------------------------------------------------------------------------------------------------------------------------------------------------------------------------------------------------------------------------------------------------------------------------------------------------------------------------------------------------------------------------------------------------------------------------------------------------------------------------------------------------------------------------------------------------------------------------------------------------|
|            |            |                        | <p> FYC, SF1, PELP1, EZR, DDX20, MMS19, ELOA, TAF9, ELAVL1, VCP, WASHC5, RYBP, DCAF13, RBM12, STIP1, CDK4, POLR3C, THG1L, MRPS2, SETD1A, SCAP, WDR82, SMC1A, AGO2, E2F4, TJP1, VPS26A, G3BP1, PCM1, RNF220, SAE1, RRP36, MCM6, AQR, IGF2R, ATP6V0D1, ADNP, UBA2, NFKB1, ZNF622, RBM15B, HNRNPA1, GAR1, RRS1, PPARGC1B, MAGOH, PBRM1, RANBP10, HHEX, HNRNPR, RRM2, RRM1, SEC24B, RSL1D1, CCT3, CDK7, H3-3B, SETD1B, PPIF, KIF2A, HMGB1, MAEA, SMARCD1, GNAQ, CANX, YY1, MLLT10, IRAK1, PIK3C2B, NAT10, TRMT10C, SNU13, EP400, SART1, CEBPZ, LEPR, CSDE1, PAR3, SKI, PRKAR2B, RRP15, LARP4, XRCC6, PNN, RPL22, ABI1, KLHL21, PCNA, CSNK2A2, UPF2, DDX3X, HDGF, NDC1, NCAPH, VPS35, ATP5MC3, EIF4G2, MCM2, JUND, HCFC1, CHEK1, AATF, ZMPSTE24, SLC25A5, ARPC4, VAC14, POM121, POLE, TRRAP, EXOSC9, POLR2A, NUP62, DYNC1H1, TSR1, XPO1, PPIA, PRPF3, IK, CLCN7, SERPINE1, TPR, ENC1, UTP20, TGFBRA1, ZFP36L2, SF3B4, GABRE, EBNA1BP2, KEAP1, UBE2N, BAZ1B, NRIP1, MTO4, TEX10, MYBBP1A, DDB1, BACH2, PSMG1, PITX1, GTF3C4, NASP, ASXL2, TCP1, CENPF, RALY, ENO1, CCT5, POLE3, CDK6, CDC5L, CHD3, NUP153, RAN, TFAM, PP2CA, SSU72, MSH2, CDK12, GLYR1, KMT2A, MCM3, GRW1, TOMM40, H4C8, GATAD2A, DKC1, DDX1, H2BC12, STX3, CUL1, CASC3, SSRP1, ARID1B, KPNB1, CPSF7, RRP1, SPTB, ATP6V0A1, HNRNPAB, KAT6A, RBBP4, CNPPD1, NCBP1, HEATR1, CCT2, HSP90AB1, EIF3B, PA2G4, HNRNPK, SMG1, TXNL1, PRPF19, SMARCA4, EIF3J, PRKDC, TRA2B, PRMT1, HNRNPC, MALT1, WWP2, SF3A3, SUPT16H, HMGA1, FARS1, CELF1, NCLN, RBMXL1, XRCC5, DDX5, PSME3, UTP4, DEK, LMO2, DDX46, EIF4A3, NUP214, IPO7, ACTG1, UBAP2L, NOP56, HNRNPDL, CORO1C, KHDRBS1, HNRNPD, RAPGEF1, LRPPRC, EIF5A, SLC7A1, SUPT6H, RANBP2, NOLC1, SNRNP200, SREBF2, STXBP5, ABCF1, MGA, AP5Z1, HSPD1, GAPDH, YBX1, ATP6V1C1, RBM3, SF3A1, AXIN1, MPHOSPH10, PES1, MYH10, IPO5, HSPH1, EP300, TGFB1, DAZAP1, RRP1B, SRRT, PABPC1, AHNK, PRPF8, SF3B3, FTL, THRAP3, MLLT1, ELOVL6, HNRNPF, MT-ND1, NPM1, CITED2, ETF1, TFRC, RUNX1, EIF4G1, TRIM28, U2AF2, BCLAF1, ECPAS, SRSF2, HSP90AA1, MDN1, NFATC3, MCM4, NOP58, RESF1, HNRNPA2B1, KIF1A, LARP1, HBZ, MAT2A, DDX21, SFPQ, PABPC4, HNRNPM, POLR1A, KCNH2, EIF3A, MCM7, SMARCC1, MYC, SET, MT-CYB, IGF2BP1, FOS, GCLM, SPTA1, MYB, KHSRP, RELN, ILF3, GLUL, ACTB, DHX9, HNRNPU, MCM5, NCL, HSPA8, FTH1 </p> |
| GO:0005694 | chromosome | 1.1434197020245962e-38 | <p> CENPN, MITF, JMJD1C, MIS18BP1, TRIP13, SUPT7L, MACROH2A1, BRD9, MUS81, BICRA, MTA2, RAD51C, CBX3, EZH2, RFW23, PAXIP1, H4C5, NCAPH2, BRD4, AHCTF1, HROB, HNRNPL, PWP1, MCM10, CHAC1, STAG2, MAD2L2, ADNP2, ARID2, DDX23, LHX4, RBL1, USP11, SS18L1, PAFAH1B1, STAG1, DNMT1, LYL1, ANAPC7, BUB3, TOP2B, LRWD1, KAT7, WDR5, RNF40, NONO, MEF2C, TCF3, NUP160, PLK4, ZC3H4, UBQLN4, ACTR8, CTR9, KANSL1, SMARCA5, H2AW, RSF1, TFAP4, TSPYL5, NIFK, NAP1L4, TCF7L2, PRAME, THOC1, SETMAR, PPP1R10, PPP2R5A, NOL7, H2AZ2, HAT1, BACH1, SETX, APEX1, BPTF, ICE1, ARID1A, NUP43, PPP1CC, AKAP8, RCC1, VPS72, PRMT5, RBMX, BAZ1A, WDR70, MLLT3, TAF4, KDM3B, BOP1, SETD2, FEN1, CHAF1A, TFD2, JADE2, NUCKS1, TMPO, SSB, DNTTIP2, TFIP11, BRCA2, BCL7B, ZFX, XRCC2, PDS5A, SMARCB1, CREBBP, EXOSC3, NUP98, ASH1L, APC, POLR1B, NFYC, PELP1, ELOA, TAF9, VCP, PSIP1, CDK4, SETD1A, WDR82, SMC1A, E2F4, MCM6, DDX18, QSER1, ADNP, NFKB1, BRD2, CHD7, GAR1, RRS1, PBRM1, CTCF </p>                                                                                                                                                                                                                                                                                                                                                                                                                                                                                                                                                                                                                                                                                                                                                                                                                                                                                                                                                                                                                                                                                                                                                                                                                                                                                                                              |

|            |                      |                        |                                                                                                                                                                                                                                                                                                                                                                                                                                                                                                                                                                                                                                                                                                                                                                                                                                                                                                                                                                                                                                                                                                                                                                                                                                                                                                                                                                                                                                                                                                                                                                                                                                                              |
|------------|----------------------|------------------------|--------------------------------------------------------------------------------------------------------------------------------------------------------------------------------------------------------------------------------------------------------------------------------------------------------------------------------------------------------------------------------------------------------------------------------------------------------------------------------------------------------------------------------------------------------------------------------------------------------------------------------------------------------------------------------------------------------------------------------------------------------------------------------------------------------------------------------------------------------------------------------------------------------------------------------------------------------------------------------------------------------------------------------------------------------------------------------------------------------------------------------------------------------------------------------------------------------------------------------------------------------------------------------------------------------------------------------------------------------------------------------------------------------------------------------------------------------------------------------------------------------------------------------------------------------------------------------------------------------------------------------------------------------------|
|            |                      |                        | ,HHEX,ANKRD17,ELF1,NSD1,RSLLD1,H3-3B,RNF138,SETD1B,FOXK2,HMGB1,SMARCD1,YY1,NOL8,NAT10,EP400,MECP2,XRCC6,PCNA,MBD1,CSNK2A2,NCAPH,MCM2,JUND,HCFC1,CHEK1,ARPC4,CHAMP1,UBP1,POLE,TRRAP,EXOSC9,POLR2A,CCDC86,SUMO3,RBM19,XPO1,IK,TPR,ENC1,EBNA1BP2,ZFR,BAZ1B,NRIP1,MYBBP1A,DDB1,BACH2,PITX1,NASP,TCP1,CENPF,POLE3,CDC5L,CHD3,RAN,BEND3,PPP2CA,MSH2,GLYR1,MCM3,GRWD1,H4C8,GATAD2A,H2BC12,SSRP1,ARID1B,RRP1,KAT6A,RBBP4,HNRNPK,PRPF19,SMARCA4,PRKDC,HNRNPC,SUPT16H,HMGA1,XRCC5,UTP4,DEK,SURF6,CDT1,LRPPIRC,SREBF2,MGA,MPHOSPH10,PES1,EP300,RRP1B,FOSB,SF3B3,MLLT1,RIF1,CITED2,WDR43,RUNX1,TRIM28,SRSF2,NFATC3,MCM4,TRIM24,HNRNPA2B1,DDX21,SFPQ,POLR1A,MCM7,SMARCC1,MYC,SET,FOS,ZEB2,ACTB,DHX9,HNRNPU,MCM5,NCL,EGR1                                                                                                                                                                                                                                                                                                                                                                                                                                                                                                                                                                                                                                                                                                                                                                                                                                                                                                                                                  |
| GO:0005681 | spliceosomal complex | 1.4482077991152633e-37 | SNRPB,PRPF38B,SREK1,CWC22,MTRRX,PHF5A,MFAP1,RHEB,EFTUD2,DHX38,DDX23,HNRNPH1,DHX16,PRPF6,HNRNPA3,DHX15,CWC25,SF3A2,SRRM2,PPIL2,PDCD7,SNRPA,PRPF4,RBMX,YJU2,RBM8A,API5,PRPF38A,TFIP11,WAC,SNRPD1,WBP11,SF1,AQR,HNRNPA1,MAGOH,HNRNPR,SNU13,SART1,PNN,PRPF3,IK,SF3B4,RALY,CDC5L,CASC3,HNRNPK,PRPF19,TRA2B,HNRNPC,SF3A3,RBMXL1,DDX5,DDX46,EIF4A3,HNRNPDL,SNRNP200,YBX1,RBM3,SF3A1,PABPC1,PRPF8,SF3B3,HNRNPF,U2AF2,SRSF2,HNRNPA2B1,HNRNPM,HNRNPU,NCL,HSPA8                                                                                                                                                                                                                                                                                                                                                                                                                                                                                                                                                                                                                                                                                                                                                                                                                                                                                                                                                                                                                                                                                                                                                                                                         |
| GO:0005737 | cytoplasm            | 2.1817181438564374e-32 | HRAS,CENPN,TXK,ACSF3,SNRPB,TMEM127,MITF,PP6C,DAP3,TOMM5,CHTOP,ERAL1,ZNF274,SEC23IP,ABRAXAS2,DNAJA2,GYG1,MMAB,RNASEH1,AP5M1,FADS2,ITFG2,TIRAP,RAD51C,NRROS,AAMP,MIX23,CWC22,CPNE7,BEGAIN,POLR3E,UBE2Q1,NEU1,DCAF7,OTUD6B,NACA,POLR1C,SRP72,TRIM35,PHB,METTL3,EZH2,SNX17,TOMM70,FES,CCDC78,RAB10,DCLRE1C,RFWD3,ULK3,DNM1L,LRRFIP1,GPATCH3,RHEB,ASAP1,PPP6R3,FUT8,SMG5,STT3A,PTDSS2,DHDDS,VKORC1L1,TIMM17A,MRPL1,SPIN4,MRPL11,AHCTF1,RPUSD4,CMBL,CHCHD3,CDC123,ANKRD13A,MRPS30,CCTDP1,NUP155,POM121C,KIF26B,SRM,HNRNPL,NLN,MYO16,PWP1,ATP11A,DOLPP1,OXAL1,EFTUD2,EML4,CRCP,RANBP3,FRMD8,STAG2,CASP8,TAF4B,PSMA3,PQBP1,PSMD3,AIFM2,PSPC1,CEP350,MAD2L2,MRRF,POLDIP2,PSMC3,NAA11,TIMM44,GART,NT5C3A,MS4A4A,FBXO45,TRIM44,TRNT1,MNS1,RNPS1,MTCH2,ALMS1,PPP3R1,SLC25A46,SYPL1,HIF1AN,USP11,SS18L1,RBM45,NOSIP,PAFAH1B1,STAG1,HNRNPH1,USP14,RAB7A,LIMD1,LYL1,NAA20,BICD1,PPP5C,BAP1,JRK,ANAPC7,BUB3,GAB2,TOP2B,LYAR,LRWD1,THOP1,EXOC7,EIF4EBP2,CCT6A,KAT7,TPP2,CLTC,TSR3,EEF2,AFG3L2,MSRA,AURKAIP1,NIPA2,CCT8,KIF5B,FAM13B,TMEM43,RTL10,FUBP3,BCCIP,SPRY2,DLAT,FAM120A,NOB1,SBF1,RNF40,CUL3,ARPP19,CMPK1,MEF2C,UBR3,TCF3,NUP160,TEX15,MAF1,GID8,CLSPN,MVK,NBAS,PLK4,CCNY,SLK,ZFYVE26,ZC3H4,TMEM33,PEBP1,GSPT1,GRSF1,NXF1,UBQLN4,FAHD1,PSMC5,AGPAT3,STK35,TIMM23,ZC3HAV1,CAPIA1,HNRNPA3,MAPK1,STAR,ZNRF1,EEF1D,CASP3,ATP2A2,IPO9,PKP3,TULP4,SURF4,PCLAF,HGB1,PDSS1,CERS2,DHX33,STRIP1,PGAM5,NSMAF,LETM1,FADS1,TBCD,PUM1,MTOR,DHX30,PDPR,IKZF3,LCLAT1,GOT2,VDAC1,SMG9,SNX8,EIF3D,TFAP4,NAA50,PTP4A2,CLDN11,DELE1,KPNA4,NIFK,FAF1,BAG6,EMD,PCYT1A,TASOR2,FKBP15,NAP1L4,DHFR,MTDH,MCOLN3,BAIAP2,COMMD4,HSPA9,MCCC1,NSDHL,MRPL15,PRAME,GMPS,ASCC3,UROD,UBE2L3,THOC1,PSMC2 |

|  |  |  |                                                                                                                                                                                                                                                                                                                                                                                                                                                                                                                                                                                                                                                                                                                                                                                                                                                                                                                                                                                                                                                                                                                                                                                                                                                                                                                                                                                                                                                                                                                                                                                                                                                                                                                                                                                                                                                                                                                                                                                                                                                                                                                                                                                                                                                                                                                                                                                                                                                                                                                                                                                                                                                                                                                                                                                                                                                                                                       |
|--|--|--|-------------------------------------------------------------------------------------------------------------------------------------------------------------------------------------------------------------------------------------------------------------------------------------------------------------------------------------------------------------------------------------------------------------------------------------------------------------------------------------------------------------------------------------------------------------------------------------------------------------------------------------------------------------------------------------------------------------------------------------------------------------------------------------------------------------------------------------------------------------------------------------------------------------------------------------------------------------------------------------------------------------------------------------------------------------------------------------------------------------------------------------------------------------------------------------------------------------------------------------------------------------------------------------------------------------------------------------------------------------------------------------------------------------------------------------------------------------------------------------------------------------------------------------------------------------------------------------------------------------------------------------------------------------------------------------------------------------------------------------------------------------------------------------------------------------------------------------------------------------------------------------------------------------------------------------------------------------------------------------------------------------------------------------------------------------------------------------------------------------------------------------------------------------------------------------------------------------------------------------------------------------------------------------------------------------------------------------------------------------------------------------------------------------------------------------------------------------------------------------------------------------------------------------------------------------------------------------------------------------------------------------------------------------------------------------------------------------------------------------------------------------------------------------------------------------------------------------------------------------------------------------------------------|
|  |  |  | <p>,MCMBP,RPTOR,MRPL45,PPIL2,PPP1R10,MRPS35,TMEM18,TNF,RAVER1,GRPEL1,RABGGTB,EIF4B,PPP4R3A,SAMSN1,NIP7,PPP2R5A,IGF2BP3,NOL7,MED28,FAM71F2,PUM2,HAT1,MCRIP2,CLTA,BACH1,PDZD8,CERT1,SETX,TRMT2A,AP3D1,NAPA,PSMG2,STK24,METTL8,APEX1,BPTF,ATP6V1G1,EDC4,RIOK2,NAA15,NUP43,AMMECR1,TRAM1,PITHD1,SPECC1,ADO,PP1CC,KCNQ5,CAVIN2,ZC3H14,B4GALT5,CDC27,HERC2,RAB35,SRSF10,CTSL,AKAP8,SBDS,RCC1,C1QBP,PPM1H,CRK,TICRR,MED15,EOGT,STK25,CAPNS1,SRSF8,PAK2,ZMYND19,ARHGAP21,KTN1,PRMT5,SNX9,PCBP2,PTDSS1,ADD1,RNF126,TMEM223,DPYS,GPX4,MCCC2,SLC25A3,MLLT3,OPA3,ALG8,RAD23B,VAT1,TAF4,RBM14,RBM8A,ARHGAP6,GOLM1,API5,INTS13,RPIA,UCK2,BTBD1,TUBB,FEN1,DYRK1A,CASD1,SLBP,DNAJC8,NUCKS1,SDCBP,PSMD1,AMD1,TMPO,NUP188,SSB,CDC37,ECHDC1,AGPAT5,GNL3L,CYB5B,IBA57,RILP,TFIP11,STRBP,PSMB2,EIF3G,ADI1,B SN,DHX29,ARHGEF2,BRCA2,RANBP1,POLR2D,ZDHHC5,EIF3M,WTAP,COPS2,NIN,RBM42,ACLY,SNRPD1,PAN3,PAF1,BIRC6,ERMAP,FASTKD2,RABL6,PHB2,TCOF1,LRRC41,TOMM22,RAP1GAP2,GRB10,XRCC2,PDS5A,BRCC3,CREBBP,EXOSC3,WBP11,KIFC3,AHSA1,EPRS1,COPS3,UBE4B,INSIG1,LSM14A,ABLIM1,TMX2,NUP98,CNOT1,LYN,ASH1L,LRRC59,GEMIN5,PHACTR2,APC,BTF3,POLR1B,JPT2,DDX42,CAPN1,WDR6,P ELP1,SLC12A2,TMEM201,EZR,TRUB2,DDX20,URM1,MMS19,SGPP2,ACAT2,YWHAG,ELAVL1,UTP15,VCP,DNAJB12,WASHC5,RYBP,SAFB2,GBP2,PSIP1,CSTB,C SNK1G2,DCAF13,BEX4,STIP1,CDK4,DVL2,PNO1,POLR3C,THG1L,MRPS2,RBM25,RRP12,SCAP,WDR82,SMC1A,AGO2,E2F4,TJP1,VPS26A,FOXRED2,G3BP1,PC M1,RNF220,TBC1D14,SAE1,DHCR7,CLCN6,ARL8B,I ER3,IGF2R,ATP6V0D1,ADNP,UBA2,NFKB1,ZNF622,ARHGDI1,BRD2,DOK3,USP37,HNRNPA1,RRS1,PPARGC1B,MAGOH,RANBP10,HHEX,ANKRD17,HNRNPR,RRM2,RRM1,PI4KA,SEC24B,CCT3,CDK7,PPIF,PKM,FOXK2,KIF2A,HMGB1,ATAD3B,MAEA,BZW1,GNAQ,CANX,Y Y1,MLLT10,IRAK1,PIK3C2B,IP6K1,TRMT10C,METAP2,AASDHPPT,MTHFD1,ADSS2,SART1,MECP2,CSDE1,PARD3,MBNL1,SKI,PRKAR2B,TKT,DDX54,AZIN1,C CDC6,N4BP2,TARDBP,LARP4,XRCC6,RPL22,ABI1,K LHL21,CDC25A,CSNK2A2,UPF2,DIAPH1,DDX3X,KIAA0753,IQGAP2,IDI1,TNPO2,SACS,LBR,HDBGF,NDC1,NCAPH,VPS35,ATP5MC3,EIF4G2,MCM2,CFL1,PFAS,HCFC1,CHEK1,AATF,CLN6,ECSIT,ZMPSTE24,UBAP2,PRMT7,OXCT1,RETREG2,SLC25A5,ARPC4,CYP3A5,S1PR3,VAC14,POM121,CHAMP1,DNAJC21,UBP1,TRRAP,PIIP5K2,NUDC,EXOSC9,CSK,DNAJC7,DNAJA1,TEX261,SUMO3,NUP62,DYNC1H1,TSR1,RBM19,XPO1,PPIA,PRPF3,IK,CLCN7,PHACTR1,SERPINE1,TPR,ENC1,SRSF7,UTP20,TGFBRAP1,ZFP36L2,SLC38A2,ZFR,ARFGAP2,KEAP1,TFB2M,UBE2N,NRIP1,MACO1,MRT04,VAPA,TEX10,GFM1,MYBBP1A,DDDB1,BACH2,PSMG1,PITX1,GTF3C4,NASP,CHST3,TCP1,CENPF,YWHAB,ENO1,FAM83H,CCT5,FUBP1,CDK6,CDC5L,CHD3,ST3GAL2,NUP153,RAN,UBC,WDR81,TFAM,HSPA4,A K2,PPP2CA,SSU72,DIDO1,GLYR1,MAN2A2,KMT2A,MCM3,NOSTRIN,GRWD1,TOMM40,PAICS,SLC30A10,CERS6,ARMC6,PRDX1,TNPO1,DKC1,DDX1,H2BC12,STX3,CUL1,LTBR,CTPS1,EWSR1,CASC3,ARID1B,KPNB1,CPSF7,SPTB,TXNRD1,ATP6V0A1,HNRNPAB,KAT6A,ATAD3A,ARF6,USP36,RBBP4,NCBP1,HEATR1,CCT2,HSP90AB1,EIF3B,PA2G4,HNRNPK,SMG1,TXNL1,DHX37,FDFT1,PRPF19,EIF3J,PRKDC,YES1,PRMT1,HNRNPC,MALT1,WWP2,HMGA1,FARSA,CELF1,NCLN,XRCC</p> |
|--|--|--|-------------------------------------------------------------------------------------------------------------------------------------------------------------------------------------------------------------------------------------------------------------------------------------------------------------------------------------------------------------------------------------------------------------------------------------------------------------------------------------------------------------------------------------------------------------------------------------------------------------------------------------------------------------------------------------------------------------------------------------------------------------------------------------------------------------------------------------------------------------------------------------------------------------------------------------------------------------------------------------------------------------------------------------------------------------------------------------------------------------------------------------------------------------------------------------------------------------------------------------------------------------------------------------------------------------------------------------------------------------------------------------------------------------------------------------------------------------------------------------------------------------------------------------------------------------------------------------------------------------------------------------------------------------------------------------------------------------------------------------------------------------------------------------------------------------------------------------------------------------------------------------------------------------------------------------------------------------------------------------------------------------------------------------------------------------------------------------------------------------------------------------------------------------------------------------------------------------------------------------------------------------------------------------------------------------------------------------------------------------------------------------------------------------------------------------------------------------------------------------------------------------------------------------------------------------------------------------------------------------------------------------------------------------------------------------------------------------------------------------------------------------------------------------------------------------------------------------------------------------------------------------------------------|

|            |              |                        |                                                                                                                                                                                                                                                                                                                                                                                                                                                                                                                                                                                                                                                                                                                                                                                                                                                                                                                                                                                                                                                              |
|------------|--------------|------------------------|--------------------------------------------------------------------------------------------------------------------------------------------------------------------------------------------------------------------------------------------------------------------------------------------------------------------------------------------------------------------------------------------------------------------------------------------------------------------------------------------------------------------------------------------------------------------------------------------------------------------------------------------------------------------------------------------------------------------------------------------------------------------------------------------------------------------------------------------------------------------------------------------------------------------------------------------------------------------------------------------------------------------------------------------------------------|
|            |              |                        | 5, DDX5, PSME3, TMEM97, ANK1, DEK, LSS, EIF4A3, NDST1, NUP214, TRIP12, IPO7, ACTG1, DDX39A, DDX56, UBAP2L, NOP56, HNRNPDL, CORO1C, KHDRBS1, HNRNPD, RAPGEF1, LRPPRC, EIF5A, FAM136A, RANBP2, DNAJB6, NOLC1, SREBF2, CBFA2T3, STXBP5, ABCF1, ACACA, TAF12, NSUN2, AP5Z1, HSPD1, PIM2, GAPDH, YBX1, LIN28B, EIF5B, PCYT2, ATP6V1C1, RBM3, STARD7, PGD, AXIN1, MS4A3, GDI2, PES1, ANP32B, MYH10, IPO5, RREB1, HSPH1, EP300, TGFBR1, DAZAP1, PCNT, STMN1, RRP1B, CLUH, PPM1G, STON2, SRRT, PABPC1, PRRC2C, SERBP1, ATP13A3, AHNAK, COA7, PTMA, FTL, MLLT1, ELOVL6, HNRNPF, MTND1, NPM1, RIF1, ETF1, CDV3, TFRC, NQO1, EIF4G1, ACP5, NEFH, NR2F2, BCLAF1, ECPAS, SRSF2, HSP90AA1, MDN1, NFATC3, CAPRIN1, SQLE, TRIM24, NOP58, HNRNPA2B1, KIF1A, BAG1, LARP1, SQSTM1, HBZ, CCAR1, MAT2A, DDX21, HMGCS1, SFPQ, SCD, PABPC4, HNRNPM, NAV1, KCNH2, SRSF3, ANKRD11, EIF3A, MCM7, SMARCC1, MYC, SET, VGF, BTG1, MT-CYB, IGF2BP1, FOS, GCLM, HMGC2, SPTA1, MYB, ODC1, KHSRP, ZEB2, RELN, FUS, ILF3, FASN, GLUL, ACTB, DHX9, HNRNPU, MCM5, NCL, EGR1, DHCR24, HSPA8, FTH1 |
| GO:0016604 | nuclear body | 3.6926907951841867e-28 | CHTOP, SREK1, CWC22, DCAF7, MTREX, PHF5A, METTL3, TCF20, RFWF3, EFTUD2, PQBP1, PSPC1, NT5C3A, RNP S1, STAG1, TPP2, SBF1, NONO, MEF2C, PRPF6, NXF1, STK35, CTR9, DHX15, UIMC1, MTOR, CWC25, SF3A2, MTDH, TCF7L2, SRRM2, ASCC3, THOC1, PPP1R10, HECTD1, CSTF2, PPP4R3A, RBM10, SETX, APEX1, ICE1, NAA15, NUP43, PPP1CC, ZC3H14, SRSF10, VPS72, SRSF8, PRPF4, ADD1, RBM14, RBM8A, API5, INTS13, DYRK1A, GTF3C6, NSRP1, TFIP11, WAC, POLR2D, WTAP, ZC3H18, CREBBP, NUP98, GEMIN5, DDX42, SF1, DDX20, SAFB2, DVL2, RBM25, SETD1A, BRD2, RBM15B, GAR1, MAGOH, SETD1B, KIF2A, SRSF6, EP400, SART1, SKI, TKT, PNN, PCNA, MBD1, SLTM, CHAMP1, SUMO3, RBM19, XPO1, PRPF3, IK, SRSF7, STK17A, NRIP1, CDC5L, CHD3, CDK12, GATAD2A, DKC1, DDX1, EWSR1, CASC3, ATP6V0A1, KAT6A, USP36, PRPF19, SF3A3, DDX5, DDX46, EIF4A3, TRIP12, DDX39A, CDT1, NOLC1, AP5Z1, SF3A1, RREB1, ALYREF, SRRT, PRPF8, THRAP3, NPM1, RIF1, SON, U2AF2, BCLAF1, SRSF2, NOP58, HNRNPA2B1, SPN, SQSTM1, SFPQ, HNRNPM, SRSF3, DHX9, HNRNPU                                                          |

**Table S13.** Top-20 GO associations with molecular function (MF), biological process (BP), or cellular component (CC) of 1147 downregulated genes. The search was performed in GO Profiler (<https://biit.cs.ut.ee/gprofiler/gost>)

| GO.ID      | Description     | padj                  | Genes                                                                                                                                                                                                                                                                                                                                                                                                                                                                                                                                               |
|------------|-----------------|-----------------------|-----------------------------------------------------------------------------------------------------------------------------------------------------------------------------------------------------------------------------------------------------------------------------------------------------------------------------------------------------------------------------------------------------------------------------------------------------------------------------------------------------------------------------------------------------|
| GO:0005515 | protein binding | 2.655052739633818e-19 | HSPA5, FN1, TXNIP, LAMA3, ARDC4, CISH, KSR1, HECW2, ADAMTSL4, FCGR2A, DDIT4, PTK2B, GDF15, PIM1, ELAPOR2, FLNC, ANXA1, CA2, LTBP4, HSP90B1, KIF21B, CARD11, ANKRD29, CAPRIN2, PLD3, ST6GAL1, NFASC, AIG1, UNC5B, REEP6, MAF, LAMB1, CLSTN3, LAPTM4B, KLF10, SCG3, IL10RA, WSB1, HDAC9, LRP1, EEF1A2, CCNL2, TSC22D1, RGS10, GAD45A, TGFB1, EPHX2, ANXA6, ABI3BP, ATM, ARG2, PLEKHH2, IVNS1ABP, F11R, NIPSNAP1, RAB6B, UBE2L6, FLNB, EPB41L2, ASS1, EML2, TGM2, COL6A5, MKNK2, HERPUD1, PPP1R13L, CD36, AIF1L, PTGS1, TMCC2, DYSF, APOL1, AKAP11, MA |

|  |  |  |                                                                                                                                                                                                                                                                                                                                                                                                                                                                                                                                                                                                                                                                                                                                                                                                                                                                                                                                                                                                                                                                                                                                                                                                                                                                                                                                                                                                                                                                                                                                                                                                                                                                                                                                                                                                                                                                                                                                                                                                                                                                                                                                                                                                                                                                                                                                                                                                                                                                                                                                                                                                                                                                                                                                                                                                                                                                                                                                                                                                                                                                                                                                                                                                                                                                                                                                                                                                                                                                                                                                                                                                                                                                                                                                                                                                                                                                                                                                                                                                       |
|--|--|--|-------------------------------------------------------------------------------------------------------------------------------------------------------------------------------------------------------------------------------------------------------------------------------------------------------------------------------------------------------------------------------------------------------------------------------------------------------------------------------------------------------------------------------------------------------------------------------------------------------------------------------------------------------------------------------------------------------------------------------------------------------------------------------------------------------------------------------------------------------------------------------------------------------------------------------------------------------------------------------------------------------------------------------------------------------------------------------------------------------------------------------------------------------------------------------------------------------------------------------------------------------------------------------------------------------------------------------------------------------------------------------------------------------------------------------------------------------------------------------------------------------------------------------------------------------------------------------------------------------------------------------------------------------------------------------------------------------------------------------------------------------------------------------------------------------------------------------------------------------------------------------------------------------------------------------------------------------------------------------------------------------------------------------------------------------------------------------------------------------------------------------------------------------------------------------------------------------------------------------------------------------------------------------------------------------------------------------------------------------------------------------------------------------------------------------------------------------------------------------------------------------------------------------------------------------------------------------------------------------------------------------------------------------------------------------------------------------------------------------------------------------------------------------------------------------------------------------------------------------------------------------------------------------------------------------------------------------------------------------------------------------------------------------------------------------------------------------------------------------------------------------------------------------------------------------------------------------------------------------------------------------------------------------------------------------------------------------------------------------------------------------------------------------------------------------------------------------------------------------------------------------------------------------------------------------------------------------------------------------------------------------------------------------------------------------------------------------------------------------------------------------------------------------------------------------------------------------------------------------------------------------------------------------------------------------------------------------------------------------------------------------|
|  |  |  | <p> RCKS, ANKZF1, ZNF692, PAPP, CHAC1, MCFD2, VEGFA, GMP<br/> PA, ERBB3, OPTN, PTK7, USP20, ITGAV, DMBX1, MRC2, TNFR<br/> SF9, CTSZ, TEAD1, GTPBP2, ID3, ADD3, ATP2A3, FAM193B,<br/> CALB1, ERMN, ZMYM2, SERPINH1, LMAN1, KIAA0040, BTG2,<br/> TMOD1, SEMA6B, KDM6B, RIPOR3, IL2RA, BLVRB, RYR1, ADA<br/> M19, SEC24D, REEP2, HYOU1, CD46, BCL6, NHLH1, TTL7, S<br/> TARD9, FAM83A, F2R, RIMS3, SEPTIN6, RAB11FIP1, SOCS2<br/> , MLXIP, MICAL2, MYO1D, LGALS1, APOE, LAMA5, P4HA1, PT<br/> PDC1, GOLGA2, BHLHE40, HRC, ULBP1, FBNP1, ITGA5, PDIA<br/> 4, TP53INP1, LLGL2, TRDN, ATF3, PYCR2, MFGE8, CALU, IL<br/> 15RA, CD24, RFK, RHOTB1, PALM, MLXIPL, MMP15, BST2, G<br/> RAP2, ABCG2, ALAS1, KRT8, SESN3, APOL6, RAB3B, NFATC4<br/> , GIPR, ID1, CTCFL, CPZ, RAB27A, RHPN1, IGF1, PYGL, UBE<br/> 2H, TLE2, NUDT4, HELZ2, ICAM5, MAPRE3, MIIP, ITGB1, MA<br/> GI1, PITPNM1, NLGN2, CTSC, FGFR3, SMIM3, TFAP2B, G0S2<br/> , NTS, WHRN, INHBE, MICAL1, USP45, NECTIN2, MUC4, PLEK<br/> HA4, BRSK1, TM6SF1, SMAD3, AP2M1, EDEM1, POLI, B2M, PS<br/> ME1, LYPLA1, MYRF, PROS1, PRKAB2, SVIP, HDAC6, ARHGEF<br/> 12, SDC3, ULBP2, SEMA7A, ATF6, TMEM70, GDI1, PCK2, NUD<br/> T12, TMEM63A, RBL2, GPC2, ROBO1, CDKN1A, ACE, UBAC1, T<br/> MEM241, TBC1D5, ACVR1C, PCLO, EXT2, ZNF397, AFDN, SDF<br/> 2L1, MFSD6, CNN2, DMTN, CYP26B1, PKX, AMOTL1, CXCL8, C<br/> DKN1C, SEMA3F, LARGE2, CDC42SE1, TRPM4, BAIAP3, BCAM<br/> , TNNT1, KCNAB2, ZMYM1, ACSF2, PTPRU, PTPRH, SKIL, POM<br/> T1, GPD5, PAN2, KDM7A, PEPR, BTN3A1, TMEM106C, SPEG,<br/> COLGALT2, PLXND1, DOCK6, NDRG2, HES7, PCED1B, PRKACA<br/> , EIF2AK1, MYBPHL, PSRC1, ADCY3, MIF4GD, GABBR1, AGRN<br/> , HLTF, PTPRS, FASTKD1, WIPI1, ATP7A, MT2A, NDRG1, TEX<br/> 19, YPEL5, SESTD1, SHC2, NSD3, CAMTA2, DNAH14, MSI1, S<br/> TAT5B, SH2D3A, NUP107, PROCR, CYP2R1, IFIH1, TGFBR3,<br/> FBXL16, SMARCA1, ULK1, GLI1, PTEN, TDO2, LRSAM1, CYST<br/> M1, ITM2C, MTURN, RAB18, PDLIM7, TMPRSS4, KHNYN, KMT5<br/> C, ZNF275, CUL7, GSN, PKHD1, ZNF697, NFE2, ALAS2, DRAP<br/> 1, PPP1R18, BTK, CTIF, ADGRL1, COL18A1, CDCP1, SMIM14<br/> , GABARAPL1, XK, ALS2CL, TIA1, SH3PX2B, THOC2, LRP4,<br/> TTC37, SELENBP1, INTS8, EPSTI1, LUC7L, ANKRD9, RGS16<br/> , IFNGR1, RNF217, CMTM7, TDRKH, LGALS9, CAMSAP3, MINK<br/> 1, RNF103, DMKN, SH3GLB2, NFE2L1, ETFDH, COTL1, SLC31<br/> A1, SEMA3A, SLC22A5, HACE1, ALDOC, SPPL2B, PITPNC1, P<br/> 4HA2, SLC25A42, DDHD2, CALR, BTBD2, RHBDD1, AMFR, ITM<br/> 2A, TSPO, AURKB, FLT1, AMPD2, TMED9, MAGED2, PTPRJ, IG<br/> SF8, PTPRF, PDIA6, LRRC20, MORF4L2, SYBU, ARL6IP5, NE<br/> K9, MACC1, PAPSS1, YIF1B, TJP3, NES, AGPAT4, INPPL1, B<br/> CL3, TRIM38, HID1, OBSCN, ARHGAP8, KYNU, MARCHF2, CXO<br/> RF38, LSM4, ITGB5, CORO7, DLG4, STK10, ESRRB, UCP2, DH<br/> TKD1, CCDC113, MSH5, SLC22A23, C4ORF46, CEBPD, RCN3,<br/> NR2F6, LDAF1, MLLT11, PDLIM4, ACBD4, IFITM1, TMOD2, W<br/> NK4, COPB1, CYLD, SYT5, TCIRG1, HLA-<br/> E, SIL1, GUK1, RBM22, AHCYL1, RHAG, ANKIB1, NCOA7, ADG<br/> RA2, MROH1, TUBB2B, SUSDB, HIP1, ERFE, KIF1B, SPARC, L<br/> ONRF2, FGFR10P2, CC2D1A, PLA2G6, THBS1, CCND2, IL32,<br/> RRAS, TMEM9, CTSB, NFKB2, SH3TC2, TRPT1, CALCOCO1, SM<br/> AP2, DACT3, TRIM3, ZBTB11, PDE4DIP, DMXL2, IFT140, SE<br/> C22B, WDR26, PDK4, COPG1, MAP3K9, LMOD1, PIDD1, ZNF17<br/> 5, TKFC, PPIB, TCAF1, SERPINB1, LRG1, CLDN12, CASTOR2<br/> , KLF13, PAAF1, GPC5, MANF, PHF21A, SPTAN1, TPD52L1, D<br/> ENND3, EPHX1, CORO6, VWA5A, FNDC4, MAN2A1, RTN3, NPAS<br/> 1, PAIP2B, ENO2, NCBP2, CASP10, TUBB4A, RNF187, HAX1,<br/> PDIA5, SOCS1, MBNL2, CFH, HIVEP3, TMEM30A, ITPKA, SEL<br/> ENON, ACVR1, PLEKHA2, CCDC92, ITGB3, SMIM1, SNX16, CO<br/> RO2A, MEIS3, MVB12A, NUCB1, NCOA4, MYO15B, PCSK4, BRW<br/> D3, PTTG1, FAM214B, AGER, NIPSNAP2, MAP3K8, DGKD, SOR<br/> T1, SAT2, ACADVL, LITAF, AZU1, PTPRC, DAB2, TMC06, IDH<br/> 1, GGA1, NBEAL1, IL6R, TMEM243, DIP2A, EHB1, NT5C2, P<br/> SAP, VWDE, SEMA6C, NFE2L3, POLG2, SLC4A11, ASAP2, PHK<br/> A1, H1- </p> |
|--|--|--|-------------------------------------------------------------------------------------------------------------------------------------------------------------------------------------------------------------------------------------------------------------------------------------------------------------------------------------------------------------------------------------------------------------------------------------------------------------------------------------------------------------------------------------------------------------------------------------------------------------------------------------------------------------------------------------------------------------------------------------------------------------------------------------------------------------------------------------------------------------------------------------------------------------------------------------------------------------------------------------------------------------------------------------------------------------------------------------------------------------------------------------------------------------------------------------------------------------------------------------------------------------------------------------------------------------------------------------------------------------------------------------------------------------------------------------------------------------------------------------------------------------------------------------------------------------------------------------------------------------------------------------------------------------------------------------------------------------------------------------------------------------------------------------------------------------------------------------------------------------------------------------------------------------------------------------------------------------------------------------------------------------------------------------------------------------------------------------------------------------------------------------------------------------------------------------------------------------------------------------------------------------------------------------------------------------------------------------------------------------------------------------------------------------------------------------------------------------------------------------------------------------------------------------------------------------------------------------------------------------------------------------------------------------------------------------------------------------------------------------------------------------------------------------------------------------------------------------------------------------------------------------------------------------------------------------------------------------------------------------------------------------------------------------------------------------------------------------------------------------------------------------------------------------------------------------------------------------------------------------------------------------------------------------------------------------------------------------------------------------------------------------------------------------------------------------------------------------------------------------------------------------------------------------------------------------------------------------------------------------------------------------------------------------------------------------------------------------------------------------------------------------------------------------------------------------------------------------------------------------------------------------------------------------------------------------------------------------------------------------------------------|



|            |                              |                         |                                                                                                                                                                                                                                                                                                                                                                                                                                                                                                                                                                                                                                                                                                                                                                                                                                                                                                                                                                                                                                                                                                                                                                                                                                                                                                                                                                                                                                                                                                                                                                                                                                                                                                                                                                                                                                                                                                                                                                                                                                                                                                                                                                                                                                                                                                                                                                                                    |
|------------|------------------------------|-------------------------|----------------------------------------------------------------------------------------------------------------------------------------------------------------------------------------------------------------------------------------------------------------------------------------------------------------------------------------------------------------------------------------------------------------------------------------------------------------------------------------------------------------------------------------------------------------------------------------------------------------------------------------------------------------------------------------------------------------------------------------------------------------------------------------------------------------------------------------------------------------------------------------------------------------------------------------------------------------------------------------------------------------------------------------------------------------------------------------------------------------------------------------------------------------------------------------------------------------------------------------------------------------------------------------------------------------------------------------------------------------------------------------------------------------------------------------------------------------------------------------------------------------------------------------------------------------------------------------------------------------------------------------------------------------------------------------------------------------------------------------------------------------------------------------------------------------------------------------------------------------------------------------------------------------------------------------------------------------------------------------------------------------------------------------------------------------------------------------------------------------------------------------------------------------------------------------------------------------------------------------------------------------------------------------------------------------------------------------------------------------------------------------------------|
|            |                              |                         | <p>10, CERCAM, CCND3, PIK3CD, OAS3, EXOC2, RPS6KC1, DYNC2LI1, TSC22D3, REEP4, TSPYL2, SMYD3, AP3M2, HIP1R, ITPR2, ARFGAP1, SETD5, ASMTL, ARRB1, TNFRSF10B, TMEM50B, C4ORF33, BATF2, FECH, SMPDL3B, FBXO44, OSTF1, COG6, LRR63, CD200R1, HJV, LTK, MMP14, OGT, MAP1A, TRIB3, PLP1, CLIP2, CHID1, GAS6, MYO5B, ADGRL3, PPFIA4, NTRK1, VCAN, RXFP1, LPAR2, GNG7, LGALS3, TAB2, WARS1, PHKB, CRYL1, LMNA, CCDC50, IARS1, BSDC1, GDE1, PLXNB2, IL13RA1, FNDC3B, STX10, CEMIP2, VSTM4, CD55, PPM1J, YIPF5, REL2, ZNF558, ITM2B, ABCB9, GTF2E2, LDLRAP1, NBR1, RGL3, CENPH, IQGAP3, MRAP2, TIAL1, ARVCF, PDIA3, KIF5A, GGT7, PIGS, AMIGO2, KCNJ11, RBCK1, HAGH, DNMI, EGLN3, DLK1, ADGRE2, PDGFB, MAST2, NIBAN2, PCOLCE, HDGFL3, KPNA5, GSTO1, STK16, DBP, CPEB4, GTF2H4, BBS4, ELP1, SOX5, STX2, LAMB2, SFXN5, ERP44, EMILIN2, DCLRE1B, GPSM3, PPP2R5B, AKNA, ERI1, VPS28, DIPK1A, OGA, ISCU, SESN2, ATP1A2, C6ORF89, BMF, YIPF2, TSKU, SMTN, SMURF2, TNMI3, NRIP3, TUT7, CPNE3, GAS2, ZFYVE28, HEMK1, FLT4, MCF2, BTN3A2, KLF12, RBPMS, WIPF3, MTCL1, C3, ANO5, DCAF8, TMEM143, ZCRB1, RAB26, SLC4A7, FRA10AC1, PLPPR2, PFKFB4, TSPAN33, HOOK1, DZIP3, CCM2, RABAC1, RTN4RL2, YARS1, SCN1B, NAT8L, UNC119, ZMIZ1, RPH3AL, TTC33, SNPH, ANGEL1, MAST1, GUCA1B, ROBO3, COL1A2, STARD10, INPP5J, SALL2, BNIP3, KHK, PIGK, HLA-B, ETAA1, ACSL6, ZNF396, PHYKPL, KLHL36, GNB5, WASL, STOM, TCAF2, TCFL5, PEX2, SNTA1, THRB, SFMBT2, FGD1, FGFR4, MAPK8IP3, SEMA4G, SHFL, GIPC1, MLF1, GTF2A1, ARID5B, ZP3, PKD1, C1GALT1, HBP1, MAPT, SNX2, TBC1D20, GEMIN2, MC4R, FMNL1, SMAD6, MORN4, APAF1, GRN, EHD2, WBP1L, CCDC88B, APBB3, RAB24, DUSP5, NOTUM, SEMA3E, SLC30A2, TMEM41B, MDGA2, ZKSCAN1, TENM1, EPS8, RNF11, WDR91, WDR31, ACAT1, WDR11, LGMN, DNAJB11, EHHADH, ERO1B, CBLB, BBC3, PCED1A, SCFD1, PDK1, BCL9L, PRRC1, DLG3, ZNF133, DTNA, ZNF83, TPD52, RHBDD2, SEC24A, C2CD2L, PRCP, GTPBP1, TENT5A, RTN4R, SH3BGR2, NIPA1, RFLNB, TMEM54, SETD7, RAB31, STK4, TRAK2, PVR, UTRN, STON1, RPL27, IMPA2, FADS3, CD93, B4GALT4, GALNT10, RTN2, ZBED8, SERGEF, SLC16A5, TNFRSF1B, CR2, UFL1, GRHL1, RB1CC1, PAX9, ACAD11, TTC7A, RAPGEF2, FUCA1, INPP4A, C18ORF54, ZNF467, CUEDC1, TNK2, GPSM1, DCP2, PPP1R16B, EPS15, ATP1B2, LHFPL2, DEF8, RPS6KA1, GTF3C3, MAP4K2, VPS16, DCTN4, GPD1L, KBTBD3, THBD, SH3BP2, VBP1, CCSAP, ENTP1, SERTAD2, DDB2, NYAP1, TTBK2, MXD3, USP18, ANAPC16, IRAK2, ADAM15</p> |
| GO:0008092 | cytoskeletal protein binding | 3.02506949085435e-7     | <p>FLNC, KIF21B, CLSTN3, ANXA6, PLEKHH2, RAB6B, FLNB, EPB41L2, EML2, AIF1L, MARCKS, ADD3, ERMN, TMOD1, REEP2, TTLL7, STARD9, MICAL2, MYO1D, APOE, GOLGA2, LLGL2, RAB3B, RAB27A, MAPRE3, ITGB1, MAGI1, MICAL1, BRSK1, HDAC6, AFDN, CNN2, DMTN, PKX, TNNT1, PSRC1, NDRG1, GLI1, PDLIM7, GSN, PPP1R18, GABARAPL1, CAMSAP3, COTL1, ALDOC, SYBU, INPPL1, OBSCN, CORO7, DLG4, PDLIM4, TMOD2, RHAG, HIP1, KIF1B, LMOD1, SPTAN1, CORO6, CORO2A, MYO15B, PTPRC, REEP4, HIP1R, MAP1A, CLIP2, MYO5B, IQGAP3, KIF5A, KCNJ11, DNMI, MAST2, HDGFL3, BBS4, SMTN, TNMI3, GAS2, WIPF3, MTCL1, HOOK1, RPH3AL, MAST1, WASL, SNTA1, MAPK8IP3, GIPC1, MAPT, FMNL1, CCDC88B, EPS8, LGMN, RFLNB, TRAK2, UTRN, VPS16, VBP1, CCSAP, TTBK2</p>                                                                                                                                                                                                                                                                                                                                                                                                                                                                                                                                                                                                                                                                                                                                                                                                                                                                                                                                                                                                                                                                                                                                                                                                                                                                                                                                                                                                                                                                                                                                                                                                                                                                               |
| GO:0003824 | catalytic activity           | 0.000008073409883835456 | <p>HSPA5, KSR1, HECW2, ADAMTS14, CPXM1, PTK2B, PIM1, AARS1, RNF213, CA2, LTBP4, HSP90B1, KIF21B, CARD11, PLD3, GFPT1, ST6GAL1, AIG1, WSB1, HDAC9, EEF1A2, RGS10, EPHX2, ATM, ARG2, RAB6B, UBE2L6, ASS1, TGM2, MKNK2, CRAT, PTGS1, PAPP, CHAC1, FUT1, GMPPA, ERBB3, GALNT12, PTK7, USP20, CTSZ, GTPBP2, ATP2A3, KDM6B, BLVRB, ADAM19, TKTL1, TTLL7, SEPTIN6, CMAS, MICAL2, P4HA1, PTPDC1, DSTYK, PDIA4, ENO3, PYCR2, RFK, RHOBTB1, MMP15, PTAR1, B4GALNT4, ALAS1, LPCAT4, SESN3, IDH2, RAB3B, CPZ, RA</p>                                                                                                                                                                                                                                                                                                                                                                                                                                                                                                                                                                                                                                                                                                                                                                                                                                                                                                                                                                                                                                                                                                                                                                                                                                                                                                                                                                                                                                                                                                                                                                                                                                                                                                                                                                                                                                                                                           |

|            |                                      |                         |                                                                                                                                                                                                                                                                                                                                                                                                                                                                                                                                                                                                                                                                                                                                                                                                                                                                                                                                                                                                                                                                                                                                                                                                                                                                                                                                                                                                                                                                                                                                                                                                                                                                                                                                                                                                                                                                                                                                                                                                                                                                                                                                                                                                                                          |
|------------|--------------------------------------|-------------------------|------------------------------------------------------------------------------------------------------------------------------------------------------------------------------------------------------------------------------------------------------------------------------------------------------------------------------------------------------------------------------------------------------------------------------------------------------------------------------------------------------------------------------------------------------------------------------------------------------------------------------------------------------------------------------------------------------------------------------------------------------------------------------------------------------------------------------------------------------------------------------------------------------------------------------------------------------------------------------------------------------------------------------------------------------------------------------------------------------------------------------------------------------------------------------------------------------------------------------------------------------------------------------------------------------------------------------------------------------------------------------------------------------------------------------------------------------------------------------------------------------------------------------------------------------------------------------------------------------------------------------------------------------------------------------------------------------------------------------------------------------------------------------------------------------------------------------------------------------------------------------------------------------------------------------------------------------------------------------------------------------------------------------------------------------------------------------------------------------------------------------------------------------------------------------------------------------------------------------------------|
|            |                                      |                         | <p>B27A, PYGL, UBE2H, NUDT4, HELZ2, CTSC, FGFR3, MICAL1, USP45, GAA, MBOAT2, BRSK1, PLOD2, EDEM1, POLI, LYPLA1, MYRF, PRKAB2, HDAC6, PGGHG, PCK2, NUDT12, CDKN1A, ACE, ATP8B3, ACVR1C, EXT2, CYP26B1, PXK, LARGE2, MYLK3, ABCA7, ACAD10, KCNAB2, ACSF2, PTPRU, PTPRH, POMT1, GPD5, PAN2, KDM7A, PECR, SPEG, HMGCL, PGM3, COLGALT2, CPD, CRYZL1, PCED1B, PRKACA, EIF2AK1, ADCY3, HLTFF, PTPRS, ATP7A, NSD3, DNAH14, DUSP8, DNASE2, CYP2R1, IFIH1, TGFBR3, SMARCA1, ULK1, PTEN, TDO2, LRSAM1, RAB18, TMPRSS4, KHNYN, KMT5C, ALAS2, BTK, SELENBP1, RGS16, RNF217, MINK1, RNF103, ETFDH, NDUFA10, HACE1, ALDOC, QSOX1, CLYBL, SPPL2B, P4HA2, SLC25A42, DDHD2, RHBDD1, AMFR, AURKB, FLT1, AMPD2, PTPRJ, PTPRF, PDIA6, PRSS16, NEK9, PAPSS1, METTL25B, AGPAT4, INPPL1, TRIM38, OBSCN, POFUT2, CHST2, KYNU, MARCHF2, STK10, DHTKD1, MSH5, CYP26A1, WNK4, CYLD, GUK1, AHCYL1, ANKIB1, TUBB2B, KIF1B, LONRF2, PLA2G6, RRAS, CTSB, TRPT1, TRIM3, PDK4, MAP3K9, PIDD1, NDUFB4, TKFC, PPIB, XYLT2, EPHX1, NIT1, MAN2A1, ENO2, HEXD, CASP10, TUBB4A, RNF187, PDIA5, ITPKA, SELENON, ACSS2, ACVR1, TARBP1, ITGB3, CA11, PCSK4, MAP3K8, DGKD, ACER3, SAT2, ACADVL, AZU1, PAPLN, PTPRC, IDH1, GTDC1, DIP2A, NT5C2, POLG2, PHKA1, CCND3, PIK3CD, OAS3, GALNT5, RPS6KC1, SMYD3, SETD5, ASMTL, MAN1B1, FECH, SMPDL3B, ENGASE, FBXO44, HJV, LTK, MMP14, OGTT, MAN2B1, TRIB3, ZDHHC8, NTRK1, CHPF, WARS1, CRYL1, IARS1, GDE1, CEMIP2, PPM1J, CAPN5, FDXR, PCYOX1L, PDIA3, KIF5A, PAFAH2, SCPEP1, GGT7, RBCK1, HAGH, DNM1, EGLN3, MAST2, GSTO1, STK16, GALK2, ERP44, FRRS1, DCLRE1B, ERI1, OGA, SESN2, ATP1A2, SIAE, SMURF2, NRIP3, TUT7, CLCA1, CPNE3, HEMK1, FLT4, PANK4, PHGDH, RAB26, FRA10AC1, PLPPR2, ACSL1, PFKFB4, DZIP3, MAN1A1, YARS1, PLCD3, NAT8L, ANGEL1, MAST1, INPP5J, KHK, PIGK, ACSL6, PHYKPL, GNB5, CTBS, FGFR4, GPAT3, C1GALT1, GAL3ST4, A4GALT, PARP12, EHD2, RAB24, DUSP5, NOTUM, RNF11, ACAT1, LGMN, EHHADH, ERO1B, ST3GAL5, RNF145, CBLB, PCED1A, PDK1, MGAT5, PDE7A, MTND4L, RHBDD2, PRCP, GTPBP1, TENT5A, TUBB1, SETD7, RAB31, STK4, IMPA2, FADS3, B4GALT4, TTLL3, GALNT10, SERGEF, BPNT1, UFL1, ACAD11, FUCA1, INPP4A, TNK2, ACSBG2, DCP2, MYORG, NIM1K, RPS6KA1, MAP4K2, GPD1L, DDB2, TTBK2, USP18, IRAK2, TXNRD3, HEPH, ADAM15</p> |
| GO:0044877 | protein - containing complex binding | 0.000021090283502000077 | <p>HSPA5, FN1, LAMA3, FCGR2A, PTK2B, PIM1, FLNC, LTBP4, LAMB1, LRP1, TGFB1, ANXA6, ABI3BP, ATM, F11R, FLNB, EPB41L2, CD36, AIF1L, MARCKS, ITGAV, MRC2, ADD3, ERMN, SERPINH1, TMOD1, MYO1D, APOE, LAMA5, ITGA5, MFGE8, KRT8, ID1, IGF1, ICAM5, ITGB1, MICAL1, SMAD3, B2M, HDAC6, SEMA7A, TMEM70, CDKN1A, TBC1D5, AFDN, DMTN, CDKN1C, IFIH1, TGFBR3, SMARCA1, ULK1, PTEN, GSN, CAMSAP3, COTL1, CALR, AMFR, PTPRF, NES, SIDT2, ITGB5, CORO7, DLG4, P2RX6, HLA-E, HIP1, SPARC, THBS1, RRAS, CTSB, PPIB, SPTAN1, CORO6, ENO2, ACVR1, ITGB3, CORO2A, AGER, SORT1, PTPRC, H110, HIP1R, MMP14, PLP1, MYO5B, LGALS3, RELB, LDLRAP1, IQGAP3, PDGFB, PCOLCE, CPEB4, LAMB2, DCLRE1B, ERI1, VPS28, SESN2, TNNT3, GAS2, SALL2, SHFL, MAPT, SNX2, FMNL1, SCFD1, RTN4R, UTRN, CD93, VPS16, DDB2, ADAM15</p>                                                                                                                                                                                                                                                                                                                                                                                                                                                                                                                                                                                                                                                                                                                                                                                                                                                                                                                                                                                                                                                                                                                                                                                                                                                                                                                                                                                                                                              |
| GO:0003779 | actin binding                        | 0.00002824821369260495  | <p>FLNC, ANXA6, PLEKHH2, FLNB, EPB41L2, AIF1L, MARCKS, ADD3, ERMN, TMOD1, MICAL2, MYO1D, ITGB1, MICAL1, HDAC6, AFDN, CNN2, DMTN, PXK, PDLIM7, GSN, PPP1R18, CAMSAP3, COTL1, INPPL1, CORO7, PDLIM4, TMOD2, HIP1, LMOD1, SPTAN1, CORO6, CORO2A, MYO15B, HIP1R, MAP1A, MYO5B, IQGAP3, SMTN, TNNT3, GAS2, WIPF3, HOOK1, WASL, SNTA1, GIPC1, MAPT, FMNL1, EPS8, UTRN, VPS16</p>                                                                                                                                                                                                                                                                                                                                                                                                                                                                                                                                                                                                                                                                                                                                                                                                                                                                                                                                                                                                                                                                                                                                                                                                                                                                                                                                                                                                                                                                                                                                                                                                                                                                                                                                                                                                                                                               |
| GO:0043168 | anion binding                        | 0.0000476523896214494   | <p>HSPA5, KSR1, PTK2B, PIM1, AARS1, RNF213, HSP90B1, KIF21B, EFF1A2, ANXA6, ATM, RAB6B, UBE2L6, ASS1, TGM2, MKNK2, ERBB3, PTK7, GTPBP2, ATP2A3, RYR1, HYOU1, TKTL1,</p>                                                                                                                                                                                                                                                                                                                                                                                                                                                                                                                                                                                                                                                                                                                                                                                                                                                                                                                                                                                                                                                                                                                                                                                                                                                                                                                                                                                                                                                                                                                                                                                                                                                                                                                                                                                                                                                                                                                                                                                                                                                                  |

|            |             |                        |                                                                                                                                                                                                                                                                                                                                                                                                                                                                                                                                                                                                                                                                                                                                                                                                                                                                                                                                                                                                                                                                                                                                                                                                                                                                                                                                                                                                                                                                                                                                                                                                                                                                                                                                                                                                                                                                                                                                                                                                                                                                                                                                                                  |
|------------|-------------|------------------------|------------------------------------------------------------------------------------------------------------------------------------------------------------------------------------------------------------------------------------------------------------------------------------------------------------------------------------------------------------------------------------------------------------------------------------------------------------------------------------------------------------------------------------------------------------------------------------------------------------------------------------------------------------------------------------------------------------------------------------------------------------------------------------------------------------------------------------------------------------------------------------------------------------------------------------------------------------------------------------------------------------------------------------------------------------------------------------------------------------------------------------------------------------------------------------------------------------------------------------------------------------------------------------------------------------------------------------------------------------------------------------------------------------------------------------------------------------------------------------------------------------------------------------------------------------------------------------------------------------------------------------------------------------------------------------------------------------------------------------------------------------------------------------------------------------------------------------------------------------------------------------------------------------------------------------------------------------------------------------------------------------------------------------------------------------------------------------------------------------------------------------------------------------------|
|            |             |                        | <p>TTLL7,STARD9,SEPTIN6,MICAL2,MYO1D,P4HA1,DSTYK,RFK,RHOBTB1,ABCG2,ALAS1,RAB3B,RAB27A,PYGL,UBE2H,HELZ2,MAGI1,PITPNM1,CTSC,FGFR3,MICAL1,PLEKHA4,BRSK1,PLOD2,PCK2,ACE,ATP8B3,ACVR1C,CYP26B1,PXK,TRPM4,MYLK3,ABCA7,ACAD10,ACSF2,SPEG,PRKACA,EIF2AK1,ADCY3,AGRN,HLTF,WIPI1,ATP7A,SESTD1,DNAH14,IFIH1,SMARCA1,ULK1,ITM2C,RAB18,GSN,ALAS2,BTK,SH3PXD2B,MINK1,ETFDH,SLC22A5,QSOX1,PITPNC1,P4HA2,AURKB,FLT1,PLEKHA8,NEK9,PAPSS1,OBSCN,KYNU,STK10,DHTKD1,MSH5,CYP26A1,P2RX6,WNK4,SYT5,GUK1,TUBB2B,HIP1,KIF1B,RRAS,PDK4,MAP3K9,TKFC,TUBB4A,ITPKA,ACSS2,ACVR1,PLEKHA2,MYO15B,MAP3K8,DGKD,ACADVL,NT5C2,PSAP,PIK3CD,OAS3,RPS6KC1,GSDMB,HIP1R,ITPR2,LTK,OGT,TRIB3,MYO5B,NTRK1,WARS1,CRYL1,IARS1,ITM2B,ABCB9,LDLRAP1,KIF5A,KCNJ11,DNM1,EGLN3,MAST2,STK16,GALK2,ATP1A2,FLT4,PANK4,RAB26,ACSL1,PFKFB4,HSPA4L,YARS1,MAST1,TUBE1,KHK,ACSL6,PHYKPL,FGFR4,STARD5,GAL3ST4,APAF1,EHD2,RAB24,ACAT1,EHHADH,ERO1B,PDK1,GTPBP1,RTN4R,TUBB1,RAB31,STK4,TTLL3,ACAD11,RAPGEF2,TNK2,ACSBG2,NIM1K,RPS6KA1,MAP4K2,TTBK2,IRAK2,TXNRD3</p>                                                                                                                                                                                                                                                                                                                                                                                                                                                                                                                                                                                                                                                                                                                                                                                                                                                                                                                                                                                                                                                                                                                                                          |
| GO:0043167 | ion binding | 0.00005235368824438149 | <p>HSPA5,KSR1,ADAMTS14,CPXM1,PTK2B,PIM1,AARS1,ANXA1,RNF213,CA2,LTBP4,HSP90B1,KIF21B,CAPRIN2,CLSTN3,KLFL10,HDAC9,LRP1,EEF1A2,EPHX2,ANXA6,ATM,ARG2,RAB6B,UBE2L6,ASS1,TGM2,MKNK2,AIF1L,PTGS1,DYSLF,ANKZF1,ZNF692,PAPPA,MCFD2,EFHD1,ERBB3,GALNT12,OPTN,PTK7,USP20,ITGAV,GTPBP2,ATP2A3,CALB1,ZMYM2,LMAN1,KDM6B,RYR1,ADAM19,SEC24D,HYOU1,TKTL1,BCL6,TTLL7,STARD9,SEPTIN6,MICAL2,CELSR2,MYO1D,APOE,P4HA1,HRC,DSTYK,ITGA5,ENO3,CALU,RFK,RHOBTB1,MMP15,ABCG2,ALAS1,IDH2,COL11A1,RAB3B,CTCF,LCPZ,RAB27A,PYGL,UBE2H,NUDT4,HELZ2,ITGB1,MAGI1,PITPNM1,CTSC,FGFR3,MICAL1,USP45,PLEKHA4,BRSK1,PLOD2,SMAD3,EDEM1,POL1,PROS1,HDAC6,PCK2,NUDT12,CDKN1A,ACE,ATP8B3,ACVR1C,PCLO,EXT2,ZNF397,CYP26B1,PXK,LARGE2,TRPM4,BAIAP3,MYLK3,ABCA7,ACAD10,ZMYM1,ACSF2,POMT1,PAN2,KDM7A,SPEG,HMGCL,PGM3,CPD,PRKACA,EIF2AK1,ADCY3,AGRN,ZSWIM4,HLTF,WIPI1,ATP7A,MT2A,YPEL5,SESTD1,NSD3,DNAH14,CYP2R1,IFIH1,SMARCA1,ULK1,GLI1,TDO2,LRSAM1,NPTXR,ITM2C,RAB18,PDLIM7,KMT5C,ZNF275,GSN,ZNF697,ALAS2,BTK,COL18A1,SH3PXD2B,LRP4,ZC3H6,KLF9,RNF217,MINK1,RNF103,ETFDH,SLC22A5,QSOX1,CLYBL,PITPNC1,P4HA2,DDHD2,CALR,AMFR,AURKB,FLT1,AMPD2,PLEKHA8,NEK9,PAPSS1,TRIM38,OBSCN,KYNU,MARCHF2,STK10,PCDH15,ESRRB,DHTKD1,MSH5,RCN3,NR2F6,PDLIM4,CYP26A1,P2RX6,WNK4,CYLD,SYT5,GUK1,RBM22,ANKIB1,ZBED5,TUBB2B,HIP1,KIF1B,SPARC,LONRF2,THBS1,RRAS,CAALCOCO1,SMAP2,TRIM3,KLF7,ZBTB11,PDK4,SUSD1,MAP3K9,ZNF175,TKFC,KLF13,PHF21A,SPTAN1,XYLT2,MAN2A1,ENO2,TUBB4A,RNF187,MBNL2,HIVEP3,ITPKA,SELENON,ACSS2,ACVR1,PLEKHA2,CA11,NUCB1,MYO15B,ZCCHC24,MAP3K8,DGKD,ACER3,SAT2,ACADVL,LITAF,IDH1,NT5C2,PSAP,VWDE,ASAP2,PIK3CD,OAS3,GALNT5,RPS6KC1,GSDMB,SMYD3,HIP1R,ITPR2,ARFGAP1,MAN1B1,FECH,SMPLD3B,LTK,MMP14,OGT,MAN2B1,TRIB3,GAS6,MYO5B,ADGRL3,NTRK1,VCAN,CHPF,RXFP1,TAB2,WARS1,CRYL1,IARS1,GDE1,CEMIP2,ZNF558,ITM2B,ABCB9,LDLRAP1,NBR1,KIF5A,KCNJ11,RBCK1,HAGH,DNM1,EGLN3,DLK1,ADGRE2,MAST2,STK16,GALK2,CPEB4,FRRS1,ERI1,ISCU,ATP1A2,TNNI3,TUT7,CLCA1,CPNE3,ZFYVE28,FLT4,PANK4,KLF12,ZCRB1,RAB26,ACSL1,PFKFB4,ZNF608,DZIP3,MAN1A1,HSPA4L,YARS1,PLCD3,ZMIZ1,RPH3AL,HIVEP2,MAST1,GUCA1B,COL1A2,SALL2,TUBE1,KHK,ACSL6,ZNF396,PHYKPL,PEX2,THRB,FGD1,FGFR4,STARD5,ZNF117,C1GALT1,GAL3ST4,PARP12,SMAD6,APAF1,EHD2,RAB24,ZK</p> |

|            |                                                     |                        |                                                                                                                                                                                                                                                                                                                                                                                                                                                                                                                                                                                                                                                                                                                                                                                                                                                                                                                                                                                                                                                                                                                                                                                                                                                            |
|------------|-----------------------------------------------------|------------------------|------------------------------------------------------------------------------------------------------------------------------------------------------------------------------------------------------------------------------------------------------------------------------------------------------------------------------------------------------------------------------------------------------------------------------------------------------------------------------------------------------------------------------------------------------------------------------------------------------------------------------------------------------------------------------------------------------------------------------------------------------------------------------------------------------------------------------------------------------------------------------------------------------------------------------------------------------------------------------------------------------------------------------------------------------------------------------------------------------------------------------------------------------------------------------------------------------------------------------------------------------------|
|            |                                                     |                        | SCAN1, RNF11, ACAT1, YPEL1, EHHADH, ERO1B, RNF145, CBLB, CACNA2D2, PDK1, MGAT5, PDE7A, ZNF133, DTNA, ZNF83, TPD52, SEC24A, GTPBP1, RTN4R, TUBB1, RAB31, STK4, UTRN, IMPA2, CD93, B4GALT4, TTLL3, GALNT10, BPNT1, ACAD11, RAPGEF2, ZNF467, TNK2, ACSBG2, DCP2, EPS15, DEF8, NIM1K, RPS6KA1, MAP4K2, THBD, TTBK2, IRAK2, TXNRD3, HEPH, ADAM15                                                                                                                                                                                                                                                                                                                                                                                                                                                                                                                                                                                                                                                                                                                                                                                                                                                                                                                |
| GO:0140096 | catalytic activity, acting on a protein             | 0.000101233925112449   | KSR1, HECW2, ADAMTS14, CPXM1, PTK2B, PIM1, RNF213, LTBP4, WSB1, HDAC9, ATM, UBE2L6, TGM2, MKNK2, PAPP, ERBB3, GALNT12, PTK7, USP20, CTSZ, KDM6B, ADAM19, TTLL7, P4HA1, PTPDC1, DSTYK, PDIA4, MMP15, PTAR1, B4GALNT4, CPZ, UBE2H, CTSC, FGFR3, USP45, BRSK1, PLOD2, LYPLA1, MYRF, PRKAB2, HDAC6, PGGHG, CDKN1A, ACE, ACVR1C, PXX, MYLK3, PTPRU, PTPRH, POMT1, KDM7A, SPEG, COLGALT2, CPD, PRKACA, EIF2AK1, HLTF, PTPRS, NSD3, DUSP8, TGFB3, ULK1, PTEN, LRSAM1, TMPRSS4, KMT5C, BTK, RNF217, MINK1, RNF103, HACE1, QSOX1, SPPL2B, P4HA2, RHBDD1, AMFR, AURKB, FLT1, PTPRJ, PTPRF, PDIA6, PRSS16, NEK9, TRIM38, OBSCN, POFUT2, MARCHF2, STK10, WNK4, CYLD, ANKIB1, LONRF2, CTSB, TRIM3, PDK4, MAP3K9, PIDD1, PPIB, XYLT2, CASP10, RNF187, PDIA5, ITPKA, ACVR1, ITGB3, PCSK4, MAP3K8, AZU1, PAPLN, PTPRC, PHKA1, CCND3, GALNT5, RPS6KC1, SMYD3, SETD5, FBXO44, HJV, LTK, MMP14, OGT, TRIB3, ZDHHC8, NTRK1, PPM1J, CAPN5, PDIA3, SCPEP1, GGT7, RBCK1, EGLN3, MAST2, STK16, ERP44, SMURF2, NRIP3, CLCA1, CPNE3, HEMK1, FLT4, DZIP3, MAST1, PIGK, FGFR4, C1GALT1, PARP12, DUSP5, RNF11, LGMN, ERO1B, RNF145, CBLB, PDK1, MGAT5, RHBDD2, PRCP, SETD7, STK4, TTLL3, GALNT10, SERGEF, UFL1, TNK2, NIM1K, RPS6KA1, MAP4K2, DDB2, TTBK2, USP18, IRAK2, TXNRD3, ADAM15 |
| GO:0042802 | identical protein binding                           | 0.0001689906771428019  | FN1, ADAMTSL4, GDF15, ST6GAL1, MAF, GADD45A, TGFB1, EPHX2, ANXA6, ATM, F11R, FLNB, ASS1, PPP1R13L, MARCKS, VEGFA, ERBB3, OPTN, DMBX1, GTPBP2, BCL6, FAM83A, APOE, P4HA1, GOLGA2, BHLHE40, FNBP1, ATF3, BST2, ABCG2, ALAS1, ID1, PYGL, MAPRE3, NLGN2, CTSC, FGFR3, SMIM3, TFA, P2B, WHRN, NECTIN2, PLEKHA4, SMAD3, B2M, MYRF, SDC3, ATF6, ROBO1, ZNF397, AMOTL1, EIF2AK1, MIF4GD, MSI1, STAT5B, CYP2R1, IFIH1, ULK1, PTEN, TDO2, NFE2, DRAP1, BTK, ALS2CL, LRP4, LUC7L, SH3GLB2, NFE2L1, SLC31A1, SPP, L2B, AMFR, AMPD2, PAPSS1, TRIM38, KYNU, STK10, CEBPD, PDLIM4, SIL1, AHCYL1, HIP1, ERFE, FGFR1OP2, PLA2G6, THBS1, DACT3, TRIM3, MAP3K9, CLDN12, CASTOR2, TPD52L1, MAN2A1, ENO2, CFH, ACVR1, CCDC92, ITGB3, SMIM1, SNX16, AGER, DGKD, SAT2, ACADVL, LITAF, IDH1, IL6R, NT5C2, PSAP, POLG2, CERCAM, HIP1R, FECH, NTRK1, WARS1, CRYL1, LMNA, ABCB9, MRAP2, PDIA3, RBCK1, DNM1, PDGFB, STX2, DCLRE1B, OGA, ISCU, SMURF2, FLT4, RBPMS, MTCL1, HOOK1, RABAC1, COL1A2, BNIP3, ACSL6, ZNF396, PHYKPL, STOM, SHFL, GIPC1, ZP3, MAPT, SNX2, SMAD6, APAF1, EHD2, SLC30A2, TENM1, ACAT1, TPD52, STK4, IMPA2, CR2, GRHL1, TNK2, GPD1L, IRAK2                                                                                                                       |
| GO:0016773 | phosphotransferase activity, alcohol group acceptor | 0.00037991011324081344 | KSR1, PTK2B, PIM1, LTBP4, ATM, MKNK2, ERBB3, PTK7, DSTYK, RFK, FGFR3, BRSK1, PRKAB2, CDKN1A, ACVR1C, PXX, MYLK3, SPEG, PRKACA, EIF2AK1, TGFB3, ULK1, BTK, MINK1, AURKB, FLT1, NEK9, PAPSS1, OBSCN, STK10, WNK4, TRPT1, PDK4, MAP3K9, TKFC, ITPKA, ACVR1, MAP3K8, DGKD, NT5C2, PHKA1, CCND3, PIK3CD, RPS6KC1, HJV, LTK, TRIB3, NTRK1, MAST2, STK16, GALK2, CPNE3, FLT4, PANK4, PFKFB4, MAST1, KHK, FGFR4, PDK1, STK4, TNK2, NIM1K, RPS6KA1, MAP4K2, TTBK2, IRAK2                                                                                                                                                                                                                                                                                                                                                                                                                                                                                                                                                                                                                                                                                                                                                                                            |
| BP         |                                                     |                        |                                                                                                                                                                                                                                                                                                                                                                                                                                                                                                                                                                                                                                                                                                                                                                                                                                                                                                                                                                                                                                                                                                                                                                                                                                                            |
| GO:0050794 | regulation of                                       | 3.949424296615564e-19  | HSPA5, FN1, TXNIP, LAMA3, CISH, KSR1, HECW2, ADAMTSL4, FCGR2A, DDIT4, PTK2B, GDF15, PIM1, ELAPOR2, AARS1, A                                                                                                                                                                                                                                                                                                                                                                                                                                                                                                                                                                                                                                                                                                                                                                                                                                                                                                                                                                                                                                                                                                                                                |

|                  |                                                                                                                                                                                                                                                                                                                                                                                                                                                                                                                                                                                                                                                                                                                                                                                                                                                                                                                                                                                                                                                                                                                                                                                                                                                                                                                                                                                                                                                                                                                                                                                                                                                                                                                                                                                                                                                                                                                                                                                                                                                                                                                                                                                                                                                                                                                                                                                                                                                                                                                                                                                                                                                                                                                                                                                                                                                                                                                                                                                                                                                                                                                                                                                                                                                                                                                                                                                                                                                                                                                                                                                                                                                                                                                                                                                                                                                                                                                                                                                                                                                                                                                                                                                                                                                                                                                                                                                                                                                                                                                                                                                                                                                                                             |
|------------------|---------------------------------------------------------------------------------------------------------------------------------------------------------------------------------------------------------------------------------------------------------------------------------------------------------------------------------------------------------------------------------------------------------------------------------------------------------------------------------------------------------------------------------------------------------------------------------------------------------------------------------------------------------------------------------------------------------------------------------------------------------------------------------------------------------------------------------------------------------------------------------------------------------------------------------------------------------------------------------------------------------------------------------------------------------------------------------------------------------------------------------------------------------------------------------------------------------------------------------------------------------------------------------------------------------------------------------------------------------------------------------------------------------------------------------------------------------------------------------------------------------------------------------------------------------------------------------------------------------------------------------------------------------------------------------------------------------------------------------------------------------------------------------------------------------------------------------------------------------------------------------------------------------------------------------------------------------------------------------------------------------------------------------------------------------------------------------------------------------------------------------------------------------------------------------------------------------------------------------------------------------------------------------------------------------------------------------------------------------------------------------------------------------------------------------------------------------------------------------------------------------------------------------------------------------------------------------------------------------------------------------------------------------------------------------------------------------------------------------------------------------------------------------------------------------------------------------------------------------------------------------------------------------------------------------------------------------------------------------------------------------------------------------------------------------------------------------------------------------------------------------------------------------------------------------------------------------------------------------------------------------------------------------------------------------------------------------------------------------------------------------------------------------------------------------------------------------------------------------------------------------------------------------------------------------------------------------------------------------------------------------------------------------------------------------------------------------------------------------------------------------------------------------------------------------------------------------------------------------------------------------------------------------------------------------------------------------------------------------------------------------------------------------------------------------------------------------------------------------------------------------------------------------------------------------------------------------------------------------------------------------------------------------------------------------------------------------------------------------------------------------------------------------------------------------------------------------------------------------------------------------------------------------------------------------------------------------------------------------------------------------------------------------------------------------------------|
| cellular process | <p>           NXA1 ,RNF213 ,CA2 ,LTBP4 ,HSP90B1 ,TSPAN13 ,CARD11 ,CA<br/>           APRIN2 ,MEG3 ,ST6GAL1 ,UNC5B ,REEP6 ,MAF ,LAMB1 ,CLST<br/>           N3 ,LAPTM4B ,KLF10 ,IL10RA ,WSB1 ,HDAC9 ,LRP1 ,EEF1A2<br/>           ,CCNL2 ,TSC22D1 ,RGS10 ,GADD45A ,TGFB1 ,ANXA6 ,ABI3B<br/>           P ,SLC6A6 ,ATM ,ARG2 ,PLEKHH2 ,IVNS1ABP ,F11R ,FLNB ,E<br/>           PB41L2 ,ASS1 ,EML2 ,TGM2 ,MKNK2 ,HERPUD1 ,PPP1R13L ,C<br/>           D36 ,PTGS1 ,DYSF ,AKAP11 ,ZNF692 ,PAPPA ,CHAC1 ,VEGFA<br/>           ,FUT1 ,EFHD1 ,ERBB3 ,OPTN ,PTK7 ,USP20 ,ITGAV ,DMBX1 ,<br/>           TNFRSF9 ,CTSZ ,TEAD1 ,ID3 ,ADD3 ,ATP2A3 ,CALB1 ,ERMN ,<br/>           ZMYM2 ,LMAN1 ,BTG2 ,TMOD1 ,SEMA6B ,KDM6B ,IL2RA ,RYR1<br/>           ,ADAM19 ,REEP2 ,HYOU1 ,CD46 ,BCL6 ,NHLH1 ,FAM83A ,F2R<br/>           ,RIMS3 ,RAB11FIP1 ,SOCS2 ,MLXIP ,MICAL2 ,CELSR2 ,LGA<br/>           LS1 ,APOE ,LAMA5 ,PTPDC1 ,GOLGA2 ,BHLHE40 ,HRC ,DSTYK<br/>           ,FNBP1 ,ITGA5 ,DEPP1 ,TP53INP1 ,LLGL2 ,TRDN ,ATF3 ,MF<br/>           GE8 ,IL15RA ,CD24 ,RASGEF1A ,RHOBTB1 ,PLEKHH3 ,PALM ,<br/>           MLXIPL ,BST2 ,STARD8 ,GRAP2 ,GPR155 ,KRT8 ,SESN3 ,RAB<br/>           3B ,NFATC4 ,GIPR ,ID1 ,CTCF ,CPZ ,RAB27A ,RHPN1 ,IGF1<br/>           ,TLE2 ,NUDT4 ,HELZ2 ,MAPRE3 ,MIIP ,ITGB1 ,MAGI1 ,PITP<br/>           NM1 ,MALAT1 ,NLGN2 ,CTSC ,FGFR3 ,VPS13D ,TFAP2B ,PPP1<br/>           R14C ,GOS2 ,NTS ,INHBE ,MICAL1 ,NECTIN2 ,MUC4 ,PLEKHA<br/>           4 ,CREB3L2 ,MBOAT2 ,BRSK1 ,SMAD3 ,AP2M1 ,EDEM1 ,B2M ,P<br/>           SME1 ,LYPLA1 ,MYRF ,PRKAB2 ,SVIP ,HDAC6 ,ARHGEF12 ,SE<br/>           MA7A ,ATF6 ,GDI1 ,PCK2 ,RBL2 ,GPC2 ,ROBO1 ,CDKN1A ,ACE<br/>           ,TBC1D5 ,ACVR1C ,PCLO ,EXT2 ,ZNF397 ,AFDN ,SDF2L1 ,CN<br/>           N2 ,DMTN ,CYP26B1 ,PXX ,AMOTL1 ,CXCL8 ,CDKN1C ,SEMA3F<br/>           ,CDC42SE1 ,TRPM4 ,BAIAP3 ,MYLK3 ,ABCA7 ,BCAM ,KCNA2<br/>           ,PTPRU ,SLC44A2 ,PTPRH ,SKIL ,POMT1 ,GDPD5 ,PAN2 ,KDM<br/>           7A ,BTN3A1 ,SPEG ,PLXND1 ,DOCK6 ,NDRG2 ,HES7 ,PRKACA<br/>           ,EIF2AK1 ,PSRC1 ,ADCY3 ,MIF4GD ,GABBR1 ,AGRN ,HLTF ,PT<br/>           PRS ,FASTKD1 ,WIPI1 ,SERPINI1 ,ATP7A ,NDRG1 ,TEX19 ,S<br/>           ESTD1 ,SHC2 ,NSD3 ,CAMTA2 ,MSI1 ,STAT5B ,SH2D3A ,DUSP<br/>           8 ,NUP107 ,IFIH1 ,TGFB3 ,SMARCA1 ,ULK1 ,GLI1 ,PTEN ,L<br/>           RSAM1 ,NPTXR ,ITM2C ,MTURN ,RAB18 ,PDLIM7 ,KMT5C ,ZNF<br/>           275 ,CUL7 ,GSN ,PKHD1 ,ZNF697 ,NFE2 ,DRAP1 ,BTK ,CTIF<br/>           ,ADGRL1 ,COL18A1 ,XK ,TIA1 ,LRP4 ,INTS8 ,ZC3H6 ,KRBA1<br/>           ,RGS16 ,KLF9 ,IFNGR1 ,RNF217 ,CMTM7 ,LGALS9 ,CAMSAP3<br/>           ,MINK1 ,NFE2L1 ,COTL1 ,SEMA3A ,HACE1 ,QSOX1 ,CLYBL ,SP<br/>           PL2B ,PITPNC1 ,DDHD2 ,CALR ,RHBDD1 ,AMFR ,ITM2A ,TSPO<br/>           ,AURKB ,FLT1 ,TMED9 ,GPR180 ,MAGED2 ,PTPRJ ,PTPRF ,MO<br/>           RF4L2 ,ARL6IP5 ,MACC1 ,NES ,INPPL1 ,BCL3 ,TRIM38 ,OBS<br/>           CN ,POFUT2 ,SIDT2 ,ARHGAP8 ,CHST2 ,MNX1 ,ITGB5 ,CORO7<br/>           ,DLG4 ,STK10 ,ESRRB ,UCP2 ,CEBPD ,RCN3 ,NR2F6 ,MLLT1<br/>           1 ,IFITM1 ,TMOD2 ,CYP26A1 ,P2RX6 ,WNK4 ,CYLD ,SYT5 ,TCI<br/>           RG1 ,HLA-<br/>           E ,RBM22 ,AHCYL1 ,ANKIB1 ,NCOA7 ,ADGRA2 ,TUBB2B ,HIP1<br/>           ,ERFE ,SPARC ,CC2D1A ,PLA2G6 ,SLC17A7 ,THBS1 ,CCND2 ,<br/>           IL32 ,RRAS ,TMEM9 ,CTSB ,NFKB2 ,SH3TC2 ,TRPT1 ,CALCOC<br/>           O1 ,DACT3 ,KLF7 ,ZBTB11 ,PDE4DIP ,IFT140 ,SEC22B ,PDK<br/>           4 ,MAP3K9 ,LMOD1 ,PIDD1 ,ZNF175 ,TKFC ,TCAF1 ,LRG1 ,CA<br/>           STOR2 ,KLF13 ,CCDC71L ,GPC5 ,MANF ,PHF21A ,SPTAN1 ,TP<br/>           D52L1 ,DENND3 ,MAN2A1 ,NPAS1 ,PAIP2B ,ENO2 ,NCBP2 ,CA<br/>           SP10 ,TUBB4A ,RNF187 ,HAX1 ,SOCS1 ,MBNL2 ,CFH ,DBNDD1<br/>           ,HIVEP3 ,TMEM30A ,ITPKA ,SELENON ,ACVR1 ,TARBP1 ,ITG<br/>           B3 ,CORO2A ,MEIS3 ,MVB12A ,NUCB1 ,NCOA4 ,BRWD3 ,PTTG1<br/>           ,AGER ,NIPSNAP2 ,MAP3K8 ,DGKD ,ACER3 ,SORT1 ,ACADVL<br/>           ,LITAF ,AZU1 ,PTPRC ,DAB2 ,DENND4B ,IDH1 ,IL6R ,PSAP ,S<br/>           EMA6C ,NFE2L3 ,POLG2 ,SLC4A11 ,H1-<br/>           10 ,CCND3 ,PIK3CD ,OAS3 ,RPS6KC1 ,DYNC2LI1 ,TSC22D3 ,<br/>           TSPYL2 ,SMYD3 ,HIP1R ,ITPR2 ,ARFGAP1 ,SETD5 ,ARRB1 ,T<br/>           NFRSF10B ,BATF2 ,FECH ,RAVER2 ,SMPDL3B ,OSTF1 ,CD200<br/>           R1 ,HJV ,LTK ,MMP14 ,OGT ,MAP1A ,TRIB3 ,PLP1 ,GAS6 ,ZDH<br/>           HC8 ,ADGRL3 ,NTRK1 ,RXFP1 ,GPR158 ,LPAR2 ,GNG7 ,LGALS<br/>           3 ,TAB2 ,TMEM116 ,WARS1 ,LMNA ,PLXNB2 ,IL13RA1 ,STX10<br/>           ,CD55 ,YIPF5 ,RELL2 ,ZNF558 ,CAPN5 ,ITM2B ,LDLRAP1 ,N<br/>           BR1 ,RGL3 ,IQGAP3 ,MRAP2 ,TIAL1 ,PDIA3 ,AMIGO2 ,KCNJ1<br/>           1 ,RBCK1 ,DNM1 ,EGLN3 ,DLK1 ,ADGRE2 ,PDGFB ,MAST2 ,NIB         </p> |
|------------------|---------------------------------------------------------------------------------------------------------------------------------------------------------------------------------------------------------------------------------------------------------------------------------------------------------------------------------------------------------------------------------------------------------------------------------------------------------------------------------------------------------------------------------------------------------------------------------------------------------------------------------------------------------------------------------------------------------------------------------------------------------------------------------------------------------------------------------------------------------------------------------------------------------------------------------------------------------------------------------------------------------------------------------------------------------------------------------------------------------------------------------------------------------------------------------------------------------------------------------------------------------------------------------------------------------------------------------------------------------------------------------------------------------------------------------------------------------------------------------------------------------------------------------------------------------------------------------------------------------------------------------------------------------------------------------------------------------------------------------------------------------------------------------------------------------------------------------------------------------------------------------------------------------------------------------------------------------------------------------------------------------------------------------------------------------------------------------------------------------------------------------------------------------------------------------------------------------------------------------------------------------------------------------------------------------------------------------------------------------------------------------------------------------------------------------------------------------------------------------------------------------------------------------------------------------------------------------------------------------------------------------------------------------------------------------------------------------------------------------------------------------------------------------------------------------------------------------------------------------------------------------------------------------------------------------------------------------------------------------------------------------------------------------------------------------------------------------------------------------------------------------------------------------------------------------------------------------------------------------------------------------------------------------------------------------------------------------------------------------------------------------------------------------------------------------------------------------------------------------------------------------------------------------------------------------------------------------------------------------------------------------------------------------------------------------------------------------------------------------------------------------------------------------------------------------------------------------------------------------------------------------------------------------------------------------------------------------------------------------------------------------------------------------------------------------------------------------------------------------------------------------------------------------------------------------------------------------------------------------------------------------------------------------------------------------------------------------------------------------------------------------------------------------------------------------------------------------------------------------------------------------------------------------------------------------------------------------------------------------------------------------------------------------------------------------------------|

|            |                                  |                       |                                                                                                                                                                                                                                                                                                                                                                                                                                                                                                                                                                                                                                                                                                                                                                                                                                                                                                                                                                                                                                                                                                                                                                                                                                                                                                                                                                                                                                                                                                                                                                                                                                                                                                                                                                                                                                                                                                                                                                                                                                                                                                                                                                                                                                                        |
|------------|----------------------------------|-----------------------|--------------------------------------------------------------------------------------------------------------------------------------------------------------------------------------------------------------------------------------------------------------------------------------------------------------------------------------------------------------------------------------------------------------------------------------------------------------------------------------------------------------------------------------------------------------------------------------------------------------------------------------------------------------------------------------------------------------------------------------------------------------------------------------------------------------------------------------------------------------------------------------------------------------------------------------------------------------------------------------------------------------------------------------------------------------------------------------------------------------------------------------------------------------------------------------------------------------------------------------------------------------------------------------------------------------------------------------------------------------------------------------------------------------------------------------------------------------------------------------------------------------------------------------------------------------------------------------------------------------------------------------------------------------------------------------------------------------------------------------------------------------------------------------------------------------------------------------------------------------------------------------------------------------------------------------------------------------------------------------------------------------------------------------------------------------------------------------------------------------------------------------------------------------------------------------------------------------------------------------------------------|
|            |                                  |                       | <p>AN2, HDGFL3, GSTO1, STK16, DBP, CPEB4, GTF2H4, BBS4, ELP1, SOX5, STX2, LAMB2, EMILIN2, GPSM3, PPP2R5B, AKNA, VPS28, CELF2, ISCU, SESN2, ATP1A2, C6ORF89, BMF, TSKU, SMURF2, TNNT1, TUT7, CPNE3, GAS2, ZFYVE28, FLT4, MCF2, BTN3A2, KLF12, RBPM5, MTCL1, C3, GARNL3, RAB26, PLPPR2, ACSL1, TMED4, ODF2L, ZNF608, CCM2, RTN4RL2, SCN1B, PLCD3, UNC119, ZMIZ1, RPH3AL, HIVEP2, MAST1, GUCA1B, KCTD20, COL1A2, INPP5J, SALL2, ARHGEF40, BNIP3, KHK, HLA-</p> <p>B, ETAA1, ZNF396, GNB5, WASL, STOM, TCAF2, TCFL5, PEX2, SNTA1, THRB, SFMBT2, FGD1, FGFR4, MAPK8IP3, SEMA4G, SHFL, GIPC1, MLF1, RTKN2, GTF2A1, ARID5B, ZNF117, ZP3, GPAT3, PKD1, HBP1, CUX1, MAPT, TBC1D20, CITED4, MC4R, SMAD6, SLC45A3, APAF1, GRN, EHD2, WBP1L, CCDC88B, APBB3, DUSP5, NOTUM, SEMA3E, SLC30A2, ZKSCAN1, TENM1, EPS8, WDR91, WDR11, LGMN, DNAJB11, CBLB, BBC3, TP53I11, CACNA2D2, SCFD1, PDK1, BCL9L, PRRC1, MGAT5, PDE7A, DLG3, ZNF133, DTNA, ZNF83, RHBDD2, SEC24A, C2CD2L, PRCP, GTPBP1, TENT5A, RTN4R, RFLNB, SETD7, RAB31, STK4, PVR, UTRN, STON1, COL15A1, IMPA2, RTN2, SERGEF, TNFRSF1B, CR2, SYDE2, UFL1, GRHL1, RB1CC1, PAX9, RAPGEF2, INPP4A, C18ORF54, ZNF467, TNK2, GPSM1, DCP2, PPP1R16B, MYORG, ATP1B2, DEF8, NIM1K, RPS6KA1, MAP4K2, VPS16, GPD1L, THBD, SH3BP2, VBP1, CCSAP, ENTR1, SERTAD2, NYAP1, TTBK2, MXD3, USP18, ANAPC16, IRAK2, ADAM15</p>                                                                                                                                                                                                                                                                                                                                                                                                                                                                                                                                                                                                                                                                                                                                                                                                                                                                                                     |
| GO:0048856 | anatomical structure development | 8.853877170428204e-18 | <p>HSPA5, FN1, TXNIP, LAMA3, HECW2, ADAMTSL4, DDIT4, PTK2B, GDF15, PIM1, ELAPOR2, AARS1, FLNC, ANXA1, RNF213, CA2, CARD11, CAPRIN2, PLD3, NFASC, UNC5B, MAF, LAMB1, CLSTN3, KLF10, HDAC9, LRP1, GADD45A, TGFB1, ANXA6, ABI3BP, ATM, ARG2, F11R, RAB6B, FLNB, ASS1, TGM2, MKNK2, PPP1R13L, CD36, DYSF, MARCKS, CHAC1, VEGFA, FUT1, EFHD1, ERBB3, PTK7, ITGAV, DMBX1, TNFRSF9, CTSZ, TEAD1, ID3, CALB1, ERMN, SERPINH1, BTG2, TMOD1, SEMA6B, KDM6B, IL2RA, RYR1, ADAM19, SEC24D, CD46, BCL6, NHLH1, TTLL7, F2R, SOCS2, MICAL2, CELSR2, LGALS1, APOE, LAMA5, BHLHE40, ITGA5, ATF3, ENO3, MFGE8, IL15RA, CD24, RHOBTB1, PALM, MLXIPL, MMP15, ALAS1, KRT8, COL11A1, NFATC4, GIPR, ID1, IGF1, TLE2, ITGB1, PITPNM1, NLGN2, CTSC, FGFR3, TFAP2B, WHRN, USP45, NECTIN2, GAA, PLEKHA4, CREB3L2, MBOAT2, BRSK1, SMAD3, B2M, MYRF, HDAC6, SEMA7A, ATF6, GDI1, PCK2, GPC2, ROBO1, CDKN1A, ACE, ACVR1C, PCLLO, EXT2, AFDN, CNN2, DMTN, CYP26B1, AMOTL1, CXCL8, CDKN1C, SEMA3F, CDC42SE1, TRPM4, MYLK3, TNNT1, PTPRU, SKIL, GPD5, KDM7A, SPEG, PGM3, PLXND1, NDRG2, HES7, PRKACA, EIF2AK1, MYBPHL, AGRN, HLTF, PTPRS, SERPINI1, ATP7A, NDRG1, TEX19, MSI1, STAT5B, NUP107, DNASE2, TGFB3, SMARCA1, ULK1, GLI1, PTEN, ITM2C, MTURN, RAB18, PDLIM7, KMT5C, CUL7, GSN, PKHD1, ALAS2, BTK, ADGRL1, COL18A1, SMIM14, XK, SH3PXD2B, THOC2, LRP4, LUC7L, IFNGR1, CMTM7, TDRKH, LGALS9, CAMSAP3, MINK1, RNF103, NFE2L1, SEMA3A, ALDOC, DDHD2, CALR, BTBD2, ITM2A, TSPO, AURKB, FLT1, PTPRJ, IGSF8, PTPRF, SELENOP, SYBU, PAPSS1, TJP3, NES, INPPL1, BCL3, OBSCN, POFUT2, SIRT2, MNX1, ITGB5, DLG4, PCDH15, ESRRB, UCP2, DHTKD1, SLC37A4, CEBPD, RCN3, NR2F6, PDLIM4, TMOD2, CYP26A1, WNK4, TCIRG1, HLA-</p> <p>E, RHAG, ADGRA2, TUBB2B, SPARC, SLC17A7, THBS1, RRAS, CTSB, NFKB2, SH3TC2, DACT3, TRIM3, KLF7, IFT140, LMOD1, PPIB, LRG1, KLF13, MANF, MAN2A1, RTN3, NPAS1, HAX1, SOCS1, HIVEP3, TMEM30A, ITPKA, SELENON, ACVR1, ITGB3, MEIS3, NCOA4, PCSK4, BRWD3, AGER, ACER3, SORT1, ACADVL, AZU1, PTPRC, DAB2, IDH1, IL6R, DIP2A, PSAP, VWDE, SEMA6C, POLG2, PIK3CD, DYNC2LI1, SMYD3, HIP1R, SETD5, BATF2, FECH, LTK, MMP14, OGT, MAP1A, PLP1, GAS6, ADGRL3, NTRK1, VCAN, RXFP1, LGALS3, TAB2, WARS1, LMNA, PLXNB2, CEMIP2, VSTM4, ITM2B, NBR1, IQGAP3, TIAL1, KIF5A,</p> |

|            |                       |                      |                                                                                                                                                                                                                                                                                                                                                                                                                                                                                                                                                                                                                                                                                                                                                                                                                                                                                                                                                                                                                                                                                                                                                                                                                                                                                                                                                                                                                                                                                                                                                                                                                                                                                                                                                                                                                                                                                                                                                                                                                                                                                                                                                                                                                                                                                                                                                                                                                                                                                                                                                                                                                                                                                                                                                                                                                  |
|------------|-----------------------|----------------------|------------------------------------------------------------------------------------------------------------------------------------------------------------------------------------------------------------------------------------------------------------------------------------------------------------------------------------------------------------------------------------------------------------------------------------------------------------------------------------------------------------------------------------------------------------------------------------------------------------------------------------------------------------------------------------------------------------------------------------------------------------------------------------------------------------------------------------------------------------------------------------------------------------------------------------------------------------------------------------------------------------------------------------------------------------------------------------------------------------------------------------------------------------------------------------------------------------------------------------------------------------------------------------------------------------------------------------------------------------------------------------------------------------------------------------------------------------------------------------------------------------------------------------------------------------------------------------------------------------------------------------------------------------------------------------------------------------------------------------------------------------------------------------------------------------------------------------------------------------------------------------------------------------------------------------------------------------------------------------------------------------------------------------------------------------------------------------------------------------------------------------------------------------------------------------------------------------------------------------------------------------------------------------------------------------------------------------------------------------------------------------------------------------------------------------------------------------------------------------------------------------------------------------------------------------------------------------------------------------------------------------------------------------------------------------------------------------------------------------------------------------------------------------------------------------------|
|            |                       |                      | <p>AMIGO2, PDGFB, NIBAN2, HDGFL3, BBS4, SOX5, STX2, LAMB2, EMILIN2, PPP2R5B, AKNA, ATP1A2, TSKU, SMTN, SMURF2, TNNI3, TUT7, GAS2, FLT4, MCF2, C3, PHGDH, RAB26, SLC4A7, HOOK1, CCM2, RTN4RL2, SCN1B, PLCD3, UNC119, ZMIZ1, SNPH, MAST1, ROBO3, COL1A2, INPP5J, SALL2, BNIP3, HLA-</p> <p>B, ACSL6, WASL, THRB, FGD1, MAPK8IP3, SEMA4G, MLF1, RTKN2, ARID5B, ZP3, PKD1, C1GALT1, CUX1, MAPT, SNX2, TBC1D20, FMNL1, SMAD6, SLC45A3, APAF1, GRN, EHD2, WBP1L, DUSP5, NOTUM, SEMA3E, TMEM41B, MDGA2, TENM1, EPS8, ACAT1, WDR11, DNAJB11, CBLB, SCFD1, PDPDF, BCL9L, DLG3, TPD52, PRCP, TENT5A, RTN4R, RFLNB, STK4, TRAK2, UTRN, COL15A1, BPNT1, TNFRSF1B, CR2, UFL1, GRHL1, RB1CC1, PAX9, TTC7A, RAPGEF2, GPSM1, PPP1R16B, MYORG, ATP1B2, LHFPL2, RPS6KA1, CCSAP, NYAP1, TTBK2, ADAM15</p>                                                                                                                                                                                                                                                                                                                                                                                                                                                                                                                                                                                                                                                                                                                                                                                                                                                                                                                                                                                                                                                                                                                                                                                                                                                                                                                                                                                                                                                                                                                                                                                                                                                                                                                                                                                                                                                                                                                                                                                                                           |
| GO:0032502 | developmental process | 2.91406480888199e-16 | <p>HSPA5, FN1, TXNIP, LAMA3, HECW2, ADAMTSL4, DDIT4, PTK2B, GDF15, PIM1, ELAPOR2, AARS1, FLNC, ANXA1, RNF213, CA2, CARD11, CAPRIN2, PLD3, NFASC, UNC5B, MAF, LAMB1, CLSTN3, KLF10, HDAC9, LRP1, GADD45A, TGFB1, ANXA6, ABI3BP, SLC6A6, ATM, ARG2, F11R, RAB6B, FLNB, ASS1, TGM2, MKNK2, PPP1R13L, CD36, DYSF, MARCKS, CHAC1, VEGFA, FUT1, EFHD1, ERBB3, PTK7, ITGAV, DMBX1, MRC2, TNFRSF9, CTSZ, TEAD1, ID3, CALB1, ERMN, SERPINH1, BTG2, TMOD1, SEMA6B, KDM6B, IL2RA, RYR1, ADAM19, SEC24D, CD46, BCL6, NHLH1, TTLL7, F2R, SEPTIN6, SOCS2, MICAL2, CELSR2, LGALS1, APOE, LAMA5, BHLHE40, ITGA5, TP53INP1, ATF3, ENO3, MFGE8, IL15RA, CD24, RHOBTB1, PALM, MLXIPL, MMP15, ALAS1, KRT8, COL11A1, NFATC4, GIPR, ID1, RAB27A, IGF1, TLE2, ITGB1, PITPNM1, NLGN2, CTSC, FGFR3, TFAP2B, WHRN, USP45, NECTIN2, GAA, PLEKHA4, CREB3L2, MBOAT2, BRSK1, SMAD3, B2M, MYRF, HDAC6, SEMA7A, ATF6, GDI1, PCK2, RBL2, GPC2, ROBO1, CDKN1A, ACE, ACVR1C, PCLO, EXT2, AFDN, CNN2, DMTN, CYP26B1, AMOTL1, CXCL8, CDKN1C, SEMA3F, CDC42SE1, TRPM4, BAIAP3, MYLK3, TNNT1, PTPRU, SKIL, GDPD5, KDM7A, SPEG, PGM3, PLXND1, NDRG2, HES7, PRKACA, EIF2AK1, MYBPHL, GABBR1, AGRN, HLTFF, PTPRS, SERPINI1, ATP7A, NDRG1, TEX19, MSI1, STAT5B, NUP107, DNASE2, TGFBR3, SMARCA1, ULK1, GLI1, PTEN, ITM2C, MTURN, RAB18, PDLIM7, KMT5C, CUL7, GSN, PKHD1, ALAS2, BTK, ADGRL1, COL18A1, SMIM14, XK, SH3PXD2B, THOC2, LRP4, LUC7L, IFNGR1, CMTM7, TDRKH, LGALS9, CAMSAP3, MINK1, RNFI103, NFE2L1, SEMA3A, ALDOC, DDHD2, CALR, BTBD2, RHBD1, AMFR, ITM2A, TSPO, AURKB, FLT1, PTPRJ, IGSF8, PTPRF, SELENOP, SYBU, PAPSS1, TJP3, NES, INPPL1, BCL3, OBSN, POFUT2, SIDT2, MNX1, ITGB5, DLG4, PCDH15, ESRRB, UCP2, DHTKD1, SLC37A4, CEBPD, RCN3, NR2F6, PDLIM4, IFITM1, TMOD2, CYP26A1, WNK4, TCIRG1, HLA-</p> <p>E, RHAG, ADGRA2, TUBB2B, HIP1, SPARC, SLC17A7, THBS1, RRAS, CTSB, NFKB2, SH3TC2, DACT3, TRIM3, KLF7, IFT140, LMOD1, PPIB, LRG1, KLF13, CCDC71L, MANF, MAN2A1, RTN3, NPAS1, HAX1, SOCS1, HIVEP3, TMEM30A, ITPKA, SELENO N, ACVR1, ITGB3, MEIS3, NCOA4, PCSK4, BRWD3, PTTG1, AGER, ACER3, SORT1, ACADVL, AZU1, PTPRC, DAB2, IDH1, IL6R, DIP2A, PSAP, VWDE, SEMA6C, POLG2, SLC4A11, PIK3CD, DYNC2LI1, SMYD3, HIP1R, SETD5, BATF2, FECH, LTK, MMP14, OGT, MAP1A, TRIB3, PLP1, GAS6, ADGRL3, NTRK1, VCAN, RXFP1, LGALS3, TAB2, WARS1, LMNA, IARS1, PLXNB2, CEMI2, VSTM4, ITM2B, NBR1, IQGAP3, TIAL1, KIF5A, AMIGO2, DLK1, PDGFB, MAST2, NIBAN2, HDGFL3, BBS4, SOX5, STX2, LAMB2, EMILIN2, PPP2R5B, AKNA, ATP1A2, TSKU, SMTN, SMURF2, TNNI3, TUT7, GAS2, FLT4, MCF2, WIPF3, C3, PHGDH, RAB26, SLC4A7, HOOK1, CCM2, RTN4RL2, SCN1B, PLCD3, UNC119, ZMIZ1, SNPH, MAST1, ROBO3, COL1A2, INPP5J, SALL2, BNIP3, HLA-</p> <p>B, ACSL6, WASL, TCFL5, THRB, FGD1, MAPK8IP3, SEMA4G, MLF1, RTKN2, ARID5B, ZP3, PKD1, C1GALT1, CUX1, MAPT, SN</p> |

|            |                                  |                        |                                                                                                                                                                                                                                                                                                                                                                                                                                                                                                                                                                                                                                                                                                                                                                                                                                                                                                                                                                                                                                                                                                                                                                                                                                                                                                                                                                                                                                                                                                                                                                                                                                                                                                                                                                                                                                                                                                                                                                                                                  |
|------------|----------------------------------|------------------------|------------------------------------------------------------------------------------------------------------------------------------------------------------------------------------------------------------------------------------------------------------------------------------------------------------------------------------------------------------------------------------------------------------------------------------------------------------------------------------------------------------------------------------------------------------------------------------------------------------------------------------------------------------------------------------------------------------------------------------------------------------------------------------------------------------------------------------------------------------------------------------------------------------------------------------------------------------------------------------------------------------------------------------------------------------------------------------------------------------------------------------------------------------------------------------------------------------------------------------------------------------------------------------------------------------------------------------------------------------------------------------------------------------------------------------------------------------------------------------------------------------------------------------------------------------------------------------------------------------------------------------------------------------------------------------------------------------------------------------------------------------------------------------------------------------------------------------------------------------------------------------------------------------------------------------------------------------------------------------------------------------------|
|            |                                  |                        | <p>X2,TBC1D20,FMNL1,SMAD6,SLC45A3,APAF1,GRN,EHD2,WBP1L,DUSP5,NOTUM,SEMA3E,TMEM41B,MDGA2,TENM1,EPS8,ACAT1,WDR11,LGMN,DNAJB11,CBLB,SCFD1,PPDPF,BCL9L,DLG3,TPD52,PRCP,TENT5A,RTN4R,RFLNB,STK4,TRAK2,UTRN,COL15A1,BPNT1,TNFRSF1B,CR2,UFL1,GRHL1,RB1CC1,PAX9,TTC7A,RAPGEF2,TNK2,GPSM1,ACSBG2,PPP1R16B,MYORG,ATP1B2,LHFPL2,RPS6KA1,CCSAP,NYAP1,TTBK2,TXNRD3,ADAM15</p>                                                                                                                                                                                                                                                                                                                                                                                                                                                                                                                                                                                                                                                                                                                                                                                                                                                                                                                                                                                                                                                                                                                                                                                                                                                                                                                                                                                                                                                                                                                                                                                                                                                 |
| GO:0048869 | cellular developmental process   | 1.4567302385469244e-15 | <p>HSPA5,FN1,TXNIP,LAMA3,HECW2,ADAMTSL4,DDIT4,PTK2B,GDF15,PIM1,FLNC,ANXA1,CARD11,CAPRIN2,PLD3,NFASC,UNC5B,MAF,LAMB1,KLF10,HDAC9,LRP1,TGFB1,ANXA6,ABI3BP,SLC6A6,ATM,F11R,RAB6B,FLNB,TGM2,MKNK2,PPP1R13L,CD36,DYSF,MARCKS,CHAC1,VEGFA,EFHD1,ERBB3,PTK7,ITGAV,MRC2,TNFRSF9,ID3,SERPINH1,BTG2,TMOD1,SEMA6B,KDM6B,IL2RA,RYR1,CD46,BCL6,NHLH1,TTL7,SEPTIN6,SOCS2,CELSR2,LGALS1,APOE,LAMA5,BHLHE40,ITGA5,TP53INP1,ATF3,IL15RA,CD24,MMP15,ALAS1,KRT8,COL11A1,NFATC4,ID1,RAB27A,IGF1,ITGB1,NLGN2,FGFR3,TFAP2B,WHRN,NECTIN2,CREB3L2,MBD2,BRSK1,SMAD3,B2M,MYRF,HDAC6,SEMA7A,GDI1,PCSK2,RBL2,GPC2,ROBO1,ACE,ACVR1C,EXT2,AFDN,CNN2,DMTN,CYP26B1,CDKN1C,SEMA3F,TRPM4,MYLK3,TNNT1,PTPRU,SKIL,GDPD5,SPEG,PGM3,PLXND1,NDRG2,HES7,PRKACA,EIF2AK1,GABBR1,AGRN,HLTF,PTPRS,SERPINI1,ATP7A,NDRG1,TEX19,MSI1,STAT5B,DNASE2,TGFBR3,SMARCA1,ULK1,GLI1,PTEN,ITM2C,MTURN,PDLIM7,CUL7,PKHD1,ALAS2,BTK,COL18A1,XK,SH3PXD2B,THOC2,LRP4,IFNGR1,CMTM7,TDRKH,LGALS9,CAMSAP3,MINK1,SEMA3A,ALDOC,CALR,BTBD2,RHBDD1,ITM2A,TSP0,FLT1,PTPRJ,PTPRF,TJP3,NES,BCL3,OBSCN,POFUT2,SIDT2,MNX1,ITGB5,DLG4,PCDH15,ESRRB,DHTKD1,SLC37A4,CEBPD,NR2F6,IFITM1,TMOD2,TCIRG1,RHAG,ADGRA2,TUBB2B,HIP1,RRAS,CTSB,NFKB2,SH3TC2,DACT3,KLF7,IFT140,LMOD1,LRG1,KLF13,CCDC71L,MANF,MAN2A1,RTN3,HAX1,SOCS1,HIVEP3,TMEM30A,ITPKA,SELENON,ACVR1,ITGB3,PCSK4,AGER,SORT1,ACADVL,AZU1,PTPRC,DAB2,IL6R,DIP2A,PSAP,SEMA6C,POLG2,SLC4A11,PIK3CD,SMYD3,BATF2,FECH,LTK,MMP14,OGT,MAP1A,TRIB3,PLP1,GAS6,ADGR L3,NTRK1,VCAN,RXFP1,LGALS3,LMNA,IARS1,PLXNB2,NBR1,TIAL1,KIF5A,DLK1,PDGFB,MAST2,NIBAN2,HDGFL3,BBS4,SOX5,STX2,LAMB2,PPP2R5B,AKNA,TSKU,TNNT3,TUT7,FLT4,MCF2,WIPF3,C3,PHGDH,SLC4A7,HOOK1,CCM2,RTN4RL2,SCN1B,ZMIZ1,SNPH,ROBO3,INPP5J,BNIP3,HLA-B,ACSL6,WASL,TCFL5,THRB,MAPK8IP3,SEMA4G,MLF1,RTKN2,ARID5B,ZP3,C1GALT1,CUX1,MAPT,SNX2,TBC1D20,SMAD6,SLC45A3,APAF1,GRN,EHD2,WBP1L,SEMA3E,MDGA2,TENM1,DNAJB11,PPDPF,BCL9L,TPD52,TENT5A,RTN4R,RFLNB,STK4,TRAK2,COL15A1,TNFRSF1B,CR2,UFL1,GRHL1,TTC7A,RAPGEF2,TNK2,GPSM1,ACSBG2,PPP1R16B,MYORG,ATP1B2,RPS6KA1,NYAP1,TXNRD3,ADAM15</p> |
| GO:0050789 | regulation of biological process | 1.762785007925035e-15  | <p>HSPA5,FN1,TXNIP,LAMA3,ARRDC4,CISH,KSR1,HECW2,ADAMTSL4,FCGR2A,DDIT4,PTK2B,GDF15,PIM1,ELAPOR2,AARS1,ANXA1,RNF213,CA2,LTBP4,HSP90B1,TSPAN13,CARD11,CAPRIN2,PLD3,MEG3,GFPT1,ST6GAL1,UNC5B,REEP6,MAF,LAMB1,CLSTN3,LAPTM4B,KLF10,IL10RA,WSB1,HDAC9,LRP1,EEF1A2,CCNL2,TSC22D1,RGS10,GADD45A,TGFB1,EPHX2,ANXA6,ABI3BP,SLC6A6,ATM,ARG2,PLEKHH2,IVNS1ABP,F11R,FLNB,EPB41L2,ASS1,EML2,TGM2,MKNK2,HERPUD1,PPP1R13L,CD36,PTGS1,DYSF,AKAP11,ZNF692,PAPPA,CHAC1,VEGFA,FUT1,EFHD1,ERBB3,OPTN,PTK7,USP20,ITGAV,DMBX1,TNFRSF9,CTSZ,TEAD1,ID3,ADD3,ATP2A3,CALB1,ERMN,ZMYM2,SERPINH1,LMAN1,BTG2,TMOD1,SEMA6B,KDM6B,IL2RA,RYR1,ADAM19,REEP2,HYOU1,CD46,BCL6,NHLH1,FAM83A,F2R,RIMS3,RAB11FIP1,SOCS2,MLXIP,MICAL2,CELSR2,LGALS1,APOE,LAMA</p>                                                                                                                                                                                                                                                                                                                                                                                                                                                                                                                                                                                                                                                                                                                                                                                                                                                                                                                                                                                                                                                                                                                                                                                                                                                                                        |



|  |  |  |                                                                                                                                                                                                                                                                                                                                                                                                                                                                                                                                                                                                                                                                                                                                                                                                                                                                                                                                                                                                                                                                                                                                                                                                                                                                                                                                                                                                                                                                                                                                                                                                                                                                                                                                                                                                                                                                                                                                                                                                                                                                                                                                                                                                                                                                                                                                                                                                                                                                                                                                                                                                                                                                                                                                                                                                                                                                                                                                                                                                                                                                                                                             |
|--|--|--|-----------------------------------------------------------------------------------------------------------------------------------------------------------------------------------------------------------------------------------------------------------------------------------------------------------------------------------------------------------------------------------------------------------------------------------------------------------------------------------------------------------------------------------------------------------------------------------------------------------------------------------------------------------------------------------------------------------------------------------------------------------------------------------------------------------------------------------------------------------------------------------------------------------------------------------------------------------------------------------------------------------------------------------------------------------------------------------------------------------------------------------------------------------------------------------------------------------------------------------------------------------------------------------------------------------------------------------------------------------------------------------------------------------------------------------------------------------------------------------------------------------------------------------------------------------------------------------------------------------------------------------------------------------------------------------------------------------------------------------------------------------------------------------------------------------------------------------------------------------------------------------------------------------------------------------------------------------------------------------------------------------------------------------------------------------------------------------------------------------------------------------------------------------------------------------------------------------------------------------------------------------------------------------------------------------------------------------------------------------------------------------------------------------------------------------------------------------------------------------------------------------------------------------------------------------------------------------------------------------------------------------------------------------------------------------------------------------------------------------------------------------------------------------------------------------------------------------------------------------------------------------------------------------------------------------------------------------------------------------------------------------------------------------------------------------------------------------------------------------------------------|
|  |  |  | <p>5,PTPDC1,GOLGA2,BHLHE40,HRC,DSTYK,FNBP1,ITGA5,DEPP1,TP53INP1,LLGL2,TRDN,ATF3,MFGE8,IL15RA,CD24,RASGEF1A,RHOBTB1,PLEKHH3,PALM,MLXIPL,BST2,STARD8,GRAP2,GPR155,KRT8,SESN3,RAB3B,NFATC4,GIPR,ID1,CTCFL,CPZ,RAB27A,RHPN1,IGF1,TLE2,NUDT4,H ELZ2,MAPRE3,MIIP,ITGB1,MAGI1,PITPNM1,MALAT1,NLGN2,CTSC,FGFR3,VPS13D,TFAP2B,PPP1R14C,GOS2,NTS,WHRN,INHBE,MICAL1,NECTIN2,MUC4,GAA,PLEKHA4,CREB3L2,MBOAT2,BRSK1,SMAD3,AP2M1,EDEM1,B2M,PSME1,LYPLA1,MYRF,PROS1,PRKAB2,SVIP,HDAC6,ARHGEF12,SEMA7A,UCA1,ATF6,GDI1,PCK2,NUDT12,RBL2,GPC2,ROBO1,CDKN1A,ACE,TBC1D5,ACVR1C,PCLO,EXT2,ZNF397,AFDN,SDF2L1,CNN2,DMTN,CYP26B1,PXK,AMOTL1,CXCL8,CDKN1C,SEMA3F,CDC42SE1,TRPM4,BAIAP3,MYLK3,ABCA7,BCAM,TNNT1,KCNAB2,PTPRU,SLC44A2,PTPRH,SKIL,POMT1,GDPD5,PAN2,KDM7A,BTN3A1,SPEG,PLXND1,DOCK6,NDRG2,HES7,PRKACA,EIF2AK1,PSRC1,ADCY3,MIF4GD,GABBR1,AGRN,HLTF,PTPRS,FASTKD1,WIPI1,SERPINI1,ATP7A,MT2A,NDRG1,TEX19,SESTD1,SHC2,NSD3,CAMTA2,MSI1,STAT5B,SH2D3A,DUSP8,NUP107,PROCR,DNASE2,IFIH1,TGFB3,SMARCA1,ULK1,GLI1,PTEN,LRSAM1,NPTXR,ITM2C,MTURN,RAB18,PDLIM7,TMPRSS4,KMT5C,ZNF275,CUL7,GSN,PKHD1,ZNF697,NFE2,DRAP1,BTK,CTIF,ADGRL1,COL18A1,XK,TIA1,LRP4,TTC37,INTS8,ZC3H6,KRBA1,LUC7L,RGS16,KLF9,IFNGR1,RNF217,CMTM7,TDRKH,LGALS9,CAMSAP3,MINK1,NFE2L1,COTL1,SEMA3A,SLC22A5,HACE1,QSOX1,CLYBL,SPPL2B,PITPNC1,DDHD2,CALR,RHBDD1,AMFR,ITM2A,TSP0,AURKB,FLT1,TMED9,GPR180,MAGED2,PTPRJ,PTPRF,SELENOP,MORF4L2,ARL6IP5,MACC1,NES,INPPL1,BCL3,TRIM38,OBSCN,POFUT2,SIDT2,ARHGAP8,CHST2,MARCHF2,LSM4,MNX1,ITGB5,CORO7,DLG4,STK10,ESRRB,UCP2,SLC37A4,CEBPD,RCN3,NR2F6,MLLT11,IFITM1,TMOD2,CYP26A1,P2RX6,WNK4,CYLD,SYT5,TCIRG1,HLA-E,RBM22,AHCYL1,ANKIB1,NCOA7,ADGRA2,TUBB2B,HIP1,ERFE,SPARC,CC2D1A,PLA2G6,SLC17A7,THBS1,CCND2,IL32,RRAS,TMEM9,CTSB,NFKB2,SH3TC2,TRPT1,CALCOCO1,DACT3,KLF7,ZBTB11,PDE4DIP,IFT140,SEC22B,PDK4,MAP3K9,LMOD1,PIDD1,ZNF175,TKFC,PIIB,TCAF1,SERPINB1,LRG1,CASTOR2,KLF13,CCDC71L,GPC5,MANF,PHF21A,SPTAN1,TPD52L1,DENND3,FNDC4,MAN2A1,RTN3,NPAS1,PAIP2B,ENO2,NCBP2,CASP10,TUBB4A,RNF187,HAX1,SOCS1,MBNL2,CFH,DBNDD1,HIVEP3,TMEM30A,ITPKA,SELENON,ACVR1,CCDC92,TARBP1,ITGB3,CORO2A,MEIS3,MVB12A,NUCB1,NCOA4,BRWD3,PTTG1,AGER,NIPSNAP2,MAP3K8,DGKD,ACER3,SORT1,ACADVL,LITAF,AZU1,PAPLN,PTPRC,DAB2,DENND4B,IDH1,GGA1,IL6R,DIP2A,PSAP,SEMA6C,NFE2L3,POLG2,SLC4A11,H1-10,CCND3,PIK3CD,OAS3,EXOC2,RPS6KC1,DYNC2LI1,TS C22D3,TSPYL2,SMYD3,HIP1R,ITPR2,ARFGAP1,SETD5,ARRB1,TNFRSF10B,BATF2,FECH,RAVER2,SMPDL3B,OSTF1,CD200R1,HJV,LTK,MMP14,OGT,MAP1A,TRIB3,PLP1,CHID1,GAS6,ZDHHC8,ADGRL3,NTRK1,RXFP1,GPR158,LPAR2,GNG7,LGALS3,TAB2,TMEM116,WARS1,LMNA,PLXNB2,IL13RA1,STX10,CEMIP2,CD55,YIPF5,RELL2,ZNF558,CAPN5,ITM2B,LDLRAP1,NBR1,RGL3,IQGAP3,MRAP2,TIAL1,PDIA3,GGT7,AMIGO2,KCNJ11,RBCK1,DNM1,EGLN3,DLK1,ADGRE2,PDGFB,MAST2,NIBAN2,PCOLCE,HDGFL3,GSTO1,STK16,DBP,CPEB4,GTf2H4,BBS4,ELP1,SOX5,STX2,LAMB2,PI15,EMILIN2,GPSM3,PPP2R5B,AKNA,ERI1,VPS28,CELF2,ISCU,SESN2,ATP1A2,C6ORF89,BMF,TSKU,SIAE,SMURF2,TNNI3,TUT7,CPNE3,GAS2,ZFYVE28,FLT4,MC F2,BTN3A2,KLF12,RBPMS,MTCL1,C3,PHGDH,GARNL3,RAB26,PLPPR2,ACSL1,TMED4,ODF2L,ZNF608,CCM2,RTN4RL2,SCN1B,PLCD3,UNC119,ZMIZ1,RPH3AL,HIVEP2,MAST1,GUCA1B,KCTD20,COL1A2,INPP5J,SALL2,ARHGEF40,B</p> |
|--|--|--|-----------------------------------------------------------------------------------------------------------------------------------------------------------------------------------------------------------------------------------------------------------------------------------------------------------------------------------------------------------------------------------------------------------------------------------------------------------------------------------------------------------------------------------------------------------------------------------------------------------------------------------------------------------------------------------------------------------------------------------------------------------------------------------------------------------------------------------------------------------------------------------------------------------------------------------------------------------------------------------------------------------------------------------------------------------------------------------------------------------------------------------------------------------------------------------------------------------------------------------------------------------------------------------------------------------------------------------------------------------------------------------------------------------------------------------------------------------------------------------------------------------------------------------------------------------------------------------------------------------------------------------------------------------------------------------------------------------------------------------------------------------------------------------------------------------------------------------------------------------------------------------------------------------------------------------------------------------------------------------------------------------------------------------------------------------------------------------------------------------------------------------------------------------------------------------------------------------------------------------------------------------------------------------------------------------------------------------------------------------------------------------------------------------------------------------------------------------------------------------------------------------------------------------------------------------------------------------------------------------------------------------------------------------------------------------------------------------------------------------------------------------------------------------------------------------------------------------------------------------------------------------------------------------------------------------------------------------------------------------------------------------------------------------------------------------------------------------------------------------------------------|

|            |                      |                        |                                                                                                                                                                                                                                                                                                                                                                                                                                                                                                                                                                                                                                                                                                                                                                                                                                                                                                                                                                                                                                                                                                                                                                                                                                                                                                                                                                                                                                                                                                                                                                                                                                                                                                                                                                                                                                                                                                                                                                                                                                                                                                                                                                                                                                                                                    |
|------------|----------------------|------------------------|------------------------------------------------------------------------------------------------------------------------------------------------------------------------------------------------------------------------------------------------------------------------------------------------------------------------------------------------------------------------------------------------------------------------------------------------------------------------------------------------------------------------------------------------------------------------------------------------------------------------------------------------------------------------------------------------------------------------------------------------------------------------------------------------------------------------------------------------------------------------------------------------------------------------------------------------------------------------------------------------------------------------------------------------------------------------------------------------------------------------------------------------------------------------------------------------------------------------------------------------------------------------------------------------------------------------------------------------------------------------------------------------------------------------------------------------------------------------------------------------------------------------------------------------------------------------------------------------------------------------------------------------------------------------------------------------------------------------------------------------------------------------------------------------------------------------------------------------------------------------------------------------------------------------------------------------------------------------------------------------------------------------------------------------------------------------------------------------------------------------------------------------------------------------------------------------------------------------------------------------------------------------------------|
|            |                      |                        | <p>NIP3,KHK,HLA-B,ETA A1,ZNF396,GNB5,WASL,STOM,TCAF2,TCFL5,PEX2,SNTA1,THRB,SFMBT2,FGD1,FGFR4,MAPK8IP3,SEMA4G,SHFL,GIPC1,MLF1,RTKN2,UTF2A1,ARID5B,ZNF117,ZP3,GPAT3,PKD1,HBP1,CUX1,MAPT,TBC1D20,CITED4,MC4R,FMNL1,SMAD6,SLC45A3,APAF1,GRN,EHD2,WBP1L,CCDC88B,APBB3,DUSP5,NOTUM,SEMA3E,SLC30A2,ZKSCAN1,TENM1,EPS8,WDR91,WDR11,LGMN,DNAJB11,CBLB,BBC3,TP53I11,CACNA2D2,SCFD1,PDK1,BCL9L,PRRC1,MGAT5,PDE7A,DLG3,ZNF133,DTNA,ZNF83,RHBDD2,SEC24A,C2CD2L,PRCP,GTPBP1,TENT5A,RTN4R,RFLNB,SETD7,RAB31,STK4,PVR,UTRN,STON1,COL15A1,IMPA2,RTN2,SERGEF,TNFRSF1B,CR2,SYDE2,UFL1,GRHL1,RB1CC1,PAX9,RAPGEF2,INPP4A,C18ORF54,ZNF467,TNK2,GPSM1,DCP2,PPP1R16B,MYORG,ATP1B2,LHFPL2,DEF8,NIM1K,RPS6KA1,MAP4K2,VPS16,GPD1L,THBD,SH3BP2,VBP1,CCSAP,ENTR1,SERTAD2,NYAP1,TTBK2,MXD3,USP18,ANAPC16,IRAK2,ADAM15</p>                                                                                                                                                                                                                                                                                                                                                                                                                                                                                                                                                                                                                                                                                                                                                                                                                                                                                                                                                                                                                                                                                                                                                                                                                                                                                                                                                                                                                                                                                        |
| GO:0050896 | response to stimulus | 2.0023684986661803e-15 | <p>HSPA5,FN1,TXNIP,LAMA3,CISH,KSR1,FCGR2A,DDIT4,PTK2B,GDF15,PIM1,ELAPOR2,ANXA1,RNF213,CA2,LTBP4,HSP90B1,CARD11,CAPRIN2,PLD3,ST6GAL1,NFASC,UNC5B,REEF6,MAF,LAMB1,KLF10,IL10RA,WSB1,HDAC9,LRP1,RGS10,GADD45A,TGFB1,EPHX2,ANXA6,ABI3BP,ATM,ARG2,IVNS1ABP,F11R,FLNB,ASS1,TGM2,MKNK2,HERPUD1,CD36,PTGS1,DYSF,APOL1,AKAP11,MARCKS,ANKZF1,PAIPA,CHAC1,VEGFA,EFHD1,ERBB3,OPTN,PTK7,USP20,ITGAV,TEAD1,ID3,ATP2A3,CALB1,SERPINH1,LMAN1,BTG2,SEMA6B,KDM6B,IL2RA,RYR1,HYOU1,CD46,BCL6,FAM83A,F2R,SOC2,CELSR2,LGALS1,APOE,LAMA5,PTPDC1,BHLHE40,HRC,DSTYK,ULBP1,FNBP1,ITGA5,PDIA4,TP53INP1,LLGL2,TRDN,ATF3,PYCR2,IL15RA,CD24,RASGEF1A,RHOBTB1,PLEKHH3,PALM,MLXIPL,MMP15,BST2,STARD8,GRAP2,ABCG2,ALAS1,GPR155,KRT8,SESN3,COL11A1,NFATC4,GIPR,ID1,CPZ,RAB27A,RHPN1,IGF1,PYGL,TLE2,NUDT4,ITGB1,MAGI1,PITPNM1,NLGN2,CTSC,FGFR3,TFA P2B,GOS2,NTS,WHRN,INHBE,MICAL1,USP45,NECTIN2,MUC4,PLEKHA4,CREB3L2,BRSK1,PLOD2,SMAD3,EDEM1,POLI,B2M,PROS1,PRKAB2,SVIP,HDAC6,ARHGEF12,ULBP2,SEMA7A,ATF6,GDI1,PCK2,GPC2,ROBO1,CDKN1A,ACE,TB C1D5,ACVR1C,PCLO,EXT2,AFDN,SDF2L1,CNN2,DMTN,CYP26B1,PXK,AMOTL1,CXCL8,CDKN1C,SEMA3F,CD42SE1,TRPM4,BAIAP3,MYLK3,ABCA7,BCAM,TNNT1,PTPRU,SLC44A2,SKIL,BTN3A1,PLXND1,DOCK6,NDRG2,HES7,PRKACA,EIF2AK1,ADCY3,GABBR1,AGRN,HLTF,PTPRS,WIPI1,ATP7A,MT2A,NDRG1,SHC2,CAMTA2,MSI1,STAT5B,SH2D3A,DUSP8,PROCR,DNASE2,CYP2R1,IFIH1,TGFBR3,ULK1,GLI1,PTEN,TDO2,LRSAM1,NPTXR,ITM2C,MTURN,RAB18,TMPRSS4,KMT5C,GSN,PKHD1,NFE2,ALAS2,BTK,ADGRL1,GABARAPL1,LRP4,RGS16,KLF9,IFNGR1,CMTM7,LGALS9,MINK1,RNF103,NFE2L1,ETFDH,COTL1,SEMA3A,SLC22A5,HACE1,SPPL2B,PITPNC1,DDHD2,CALR,RHBDD1,AMFR,ITM2A,TSPO,AURKB,FLT1,GPR180,PTPRJ,PTPRF,SELENOP,PDIA6,MORF4L2,ARL6IP5,MACC1,INPPL1,BCL3,TRIM38,OBSCN,SIDT2,ARHGAP8,CHST2,KYNU,MARCHF2,ITGB5,CORO7,DLG4,PCDH15,ESRRB,UCP2,SLC37A4,MSH5,CEBPD,RCN3,NR2F6,MLLT11,IFTM1,TMOD2,CYP26A1,P2RX6,WNK4,CYLD,SYT5,TCIRG1,HLA-E,GUK1,RBM22,AHCYL1,NCOA7,ADGRA2,TUBB2B,SUSD6,HIP1,ERFE,FGFR10P2,CC2D1A,PLA2G6,THBS1,CCND2,IL32,RRAS,TMEM9,CTSB,NFKB2,SH3TC2,SWI5,CALCOCO1,DACT3,KLF7,IFT140,PDK4,MAP3K9,PIDD1,ZNF175,NDUFB4,TKFC,PIIB,LRG1,CASTOR2,GPC5,MANF,TPD52L1,DENND3,EPHX1,FNDC4,NPAS1,ENO2,CASP10,RNF187,HAX1,SOC1,CFH,ITPKA,SELENON,ACVR1,CCDC92,ITGB3,CORO2A,MEIS3,MVB12A,NUCB1,NCOA4,PTTG1,AGER,MAP3K8,DGKD,ACER3,SORT1,ACADVL,LITAF,AZU1,PTPRC,D</p> |

|           |                       |                       |                                                                                                                                                                                                                                                                                                                                                                                                                                                                                                                                                                                                                                                                                                                                                                                                                                                                                                                                                                                                                                                                                                                                                                                                                                                                                                                                                                                                                                                                                                                                                                                                                                                                                                                                                                                                                                                                                                                                                                                                                                                                                                                     |
|-----------|-----------------------|-----------------------|---------------------------------------------------------------------------------------------------------------------------------------------------------------------------------------------------------------------------------------------------------------------------------------------------------------------------------------------------------------------------------------------------------------------------------------------------------------------------------------------------------------------------------------------------------------------------------------------------------------------------------------------------------------------------------------------------------------------------------------------------------------------------------------------------------------------------------------------------------------------------------------------------------------------------------------------------------------------------------------------------------------------------------------------------------------------------------------------------------------------------------------------------------------------------------------------------------------------------------------------------------------------------------------------------------------------------------------------------------------------------------------------------------------------------------------------------------------------------------------------------------------------------------------------------------------------------------------------------------------------------------------------------------------------------------------------------------------------------------------------------------------------------------------------------------------------------------------------------------------------------------------------------------------------------------------------------------------------------------------------------------------------------------------------------------------------------------------------------------------------|
|           |                       |                       | <p>AB2, DENND4B, IDH1, IL6R, PSAP, SEMA6C, NFE2L3, POLG2, SLC4A11, CCND3, PIK3CD, OAS3, RPS6KC1, GSDMB, TSC22D3, TSPYL2, SMYD3, HIP1R, ITPR2, ARFGAP1, ARRB1, TNFRSF10B, BATF2, MAN1B1, FECH, SMPDL3B, FBXO44, OSTF1, CD200R1, HJV, LTK, MMP14, OGT, TRIB3, PLP1, CHID1, GAS6, ADGRL3, NTRK1, RXFP1, GPR158, LPAR2, GNG7, LGALS3, TAB2, TMEM116, LMNA, PLXNB2, IL13RA1, CD55, REL2, CAPN5, LDLRAP1, NBR1, RGL3, IQGAP3, MRAP2, TIAL1, PDIA3, KIF5A, PAFAH2, GGT7, KCNJ11, RBCK1, EGLN3, DLK1, ADGRE2, PDGFB, MAST2, NIBAN2, HDGFL3, GSTO1, STK16, CPEB4, GTF2H4, BBS4, SOX5, STX2, LAMB2, ERP44, EMILIN2, DCLRE1B, GPSM3, PPP2R5B, AKNA, SESN2, ATP1A2, C6ORF89, BMF, TSKU, SMURF2, TNNT1, CLCA1, CPNE3, GAS2, ZFYVE28, FLT4, MCF2, BTN3A2, RBPMS, C3, GARNL3, SLC4A7, PLPPR2, ACSL1, TMED4, CCM2, MAN1A1, HSPA4L, RTN4RL2, SCN1B, PLCD3, UNC119, ZMIZ1, RPH3AL, MAST1, GUCA1B, ROBO3, COL1A2, ARHGEF40, BNIP3, KHK, HLAB, ETAA1, GNB5, WASL, THRB, FGD1, FGFR4, MAPK8IP3, SEMA4G, SHFL, GIPC1, MLF1, RTKN2, ARID5B, ZP3, GPAT3, PKD1, HBP1, MAPT, CITED4, MC4R, SMAD6, MORN4, APAF1, GRN, WBP1L, CCDC88B, DUSP5, NOTUM, SEMA3E, SLC30A2, TENM1, EPS8, ACAT1, WDR11, LGMN, CBLB, BBC3, SCFD1, PDK1, BCL9L, MGAT5, PDE7A, DTNA, RHBDD2, C2CD2L, PRCP, GTPBP1, TENT5A, RTN4R, SETD7, RAB31, STK4, PVR, STON1, COL15A1, RPL27, IMPA2, SERGEF, TNFRSF1B, CR2, SYDE2, UFL1, RB1CC1, PAX9, RAPGEF2, INPP4A, TNK2, PPP1R16B, MYORG, NIM1K, RPS6KA1, MAP4K2, GPD1L, THBD, SH3BP2, DDB2, NYAP1, TTBK2, USP18, IRAK2, TXNRD3, ADAM15</p>                                                                                                                                                                                                                                                                                                                                                                                                                                                                                                                                                                                      |
| GO:006507 | biological regulation | 3.117291731752886e-15 | <p>HSPA5, FN1, TXNIP, LAMA3, ARRDC4, CISH, KSR1, HECW2, ADAMTSL4, FCGR2A, DDIT4, PTK2B, GDF15, PIM1, ELAPOR2, AARS1, ANXA1, RNF213, CA2, LTBP4, HSP90B1, TSPAN13, CARD11, CAPRIN2, PLD3, MEG3, GFPT1, ST6GAL1, UNC5B, REEP6, MAF, LAMB1, CLSTN3, LAPTM4B, KLF10, IL10RA, WSB1, HDAC9, LRP1, EEF1A2, CCNL2, TSC22D1, RGS10, GADD45A, TGFB1, EPHX2, ANXA6, ABI3BP, SLC6A6, ATM, ARG2, PLEKHH2, IVNS1ABP, F11R, FLNB, EPB41L2, ASS1, EML2, TGM2, MKNK2, HERPUD1, PPP1R13L, CD36, PTGS1, DYSF, AKAP11, ZNF692, PAPP, CHAC1, VEGFA, FUT1, EFHD1, ERBB3, OPTN, PTK7, USP20, ITGAV, DMBX1, TNFRSF9, CTSZ, TEAD1, ID3, ADD3, ATP2A3, CALB1, ERMN, ZMYM2, SERPINH1, LMAN1, BTG2, TMOD1, SEMA6B, KDM6B, IL2RA, RYR1, ADAM19, REEP2, HYOU1, CD46, BCL6, NHLH1, FAM83A, F2R, RIMS3, RAB11FIP1, SOCS2, MLXIP, MICAL2, CELSR2, LGALS1, APOE, LAMA5, PTPDC1, GOLGA2, BHLHE40, SLC29A4, HRC, DSTYK, FNBP1, ITGA5, DEPP1, TP53INP1, LLGL2, TRDN, ATF3, MFGE8, IL15RA, CD24, RASGEF1A, RFK, RHOTB1, PLEKHH3, PALM, LIXIP, MMP15, BST2, STARD8, GRAP2, GPR155, KRT8, SESN3, RAB3B, NFATC4, GIPR, ID1, CTCFL, CPZ, RAB27A, RHPN1, IGF1, TLE2, NUDT4, HELZ2, MAPRE3, MIIP, ITGB1, MAGI1, PITPNM1, MALAT1, NLGN2, CTSC, FGFR3, VPS13D, TFAP2B, PPP1R14C, GOS2, NTS, WHRN, INHBE, MICAL1, NECTIN2, MUC4, GAA, PLEKHA4, CREB3L2, MBOAT2, BRSK1, SMAD3, AP2M1, EDEM1, B2M, PSME1, LYPLA1, MYRF, PROS1, PRKAB2, SVIP, HDAC6, ARHGEF12, SEMA7A, UCA1, ATF6, GDI1, PCK2, NUDT12, RBL2, GPC2, ROBO1, CDKN1A, ACE, ATP8B3, TBC1D5, ACVR1C, PCLO, EXT2, ZNF397, AFDN, SDF2L1, CNN2, DMTN, CYP26B1, PXX, AMOTL1, CXCL8, CDKN1C, SEMA3F, CDC42SE1, TRPM4, BAIAP3, MYLK3, ABCA7, BCAM, TNNT1, KCNAB2, PTPRU, SLC44A2, PTPRH, SKIL, POMT1, GDDP5, PAN2, KDM7A, BTN3A1, SPEG, PLXND1, DOCK6, NDRG2, HES7, PRKACA, EIF2AK1, PSRC1, ADCY3, MIF4GD, GABBR1, AGRN, HLTFF, PTPRS, FASTKD1, WIPI1, SERPINI1, ATP7A, MT2A, NDRG1, TEX19, SESTD1, SHC2, NSD3, CAMTA2, MSI1, STAT5B, SH2D3A, DUSP8, NUP107, PROCR, DNASE2, IFIH1, TGFB3, SMARCA1, ULK1, GLI1, PTEN, LRSAM1, NPTXR, ITM2C, MTURN, RAB18, PDLIM7, TMPRSS4, KMT5C, ZNF275, CUL7, GSN, PKHD1, ZN</p> |

|          |      |              |                                                                                                                                                                                                                                                                                                                                                                                                                                                                                                                                                                                                                                                                                                                                                                                                                                                                                                                                                                                                                                                                                                                                                                                                                                                                                                                                                                                                                                                                                                                                                                                                                                                                                                                                                                                                                                                                                                                                                                                                                                                                                                                                                                                                                                                                                                                                                                                                                                                                                                                                                                                                                                                                                                                                                                                                                                                                                                                                                           |
|----------|------|--------------|-----------------------------------------------------------------------------------------------------------------------------------------------------------------------------------------------------------------------------------------------------------------------------------------------------------------------------------------------------------------------------------------------------------------------------------------------------------------------------------------------------------------------------------------------------------------------------------------------------------------------------------------------------------------------------------------------------------------------------------------------------------------------------------------------------------------------------------------------------------------------------------------------------------------------------------------------------------------------------------------------------------------------------------------------------------------------------------------------------------------------------------------------------------------------------------------------------------------------------------------------------------------------------------------------------------------------------------------------------------------------------------------------------------------------------------------------------------------------------------------------------------------------------------------------------------------------------------------------------------------------------------------------------------------------------------------------------------------------------------------------------------------------------------------------------------------------------------------------------------------------------------------------------------------------------------------------------------------------------------------------------------------------------------------------------------------------------------------------------------------------------------------------------------------------------------------------------------------------------------------------------------------------------------------------------------------------------------------------------------------------------------------------------------------------------------------------------------------------------------------------------------------------------------------------------------------------------------------------------------------------------------------------------------------------------------------------------------------------------------------------------------------------------------------------------------------------------------------------------------------------------------------------------------------------------------------------------------|
|          |      |              | <p>F697,NFE2,DRAP1,BTK,CTIF,ADGRL1,COL18A1,XK,ALS2CL,TIA1,SH3PXD2B,LRP4,TTC37,INTS8,ZC3H6,KRBA1,LUC7L,RGS16,KLF9,IFNGR1,RNF217,CMTM7,TDRKH,LGALS9,CAMSAP3,MINK1,NFE2L1,COTL1,SEMA3A,SLC22A5,HACE1,QSOX1,CLYBL,SPPL2B,PITPNC1,DDHD2,CALR,RHBDD1,AMFR,ITM2A,TSPO,AURKB,FLT1,TMED9,GPR180,MAGED2,PTPRJ,PTPRF,SELENOP,MORF4L2,ARL6IP5,MACC1,TJP3,NES,INPPL1,BCL3,TRIM38,OBSCN,POFUT2,SIPT2,ARHGAP8,CHST2,MARCHF2,LSM4,MNX1,ITGB5,CORO7,DLG4,STK10,ESRRB,UCP2,SLC37A4,CEBPD,RCN3,NR2F6,MLLT11,IFITM1,TMOD2,CYP26A1,P2RX6,WNK4,CYLD,SYT5,TCIRG1,HLA-E,RBM22,AHCYL1,ANKIB1,NCOA7,ADGRA2,TUBB2B,HIP1,ERFE,SPARC,CC2D1A,PLA2G6,SLC17A7,THBS1,CCND2,IL32,RRAS,TMEM9,CTSB,NFKB2,SH3TC2,TRPT1,CALCOCO1,SMAP2,DACT3,KLF7,ZBTB11,PDE4DIP,DMXL2,IFT140,SEC22B,PDK4,MAP3K9,LMOD1,PIDD1,ZNF175,TKFC,PPIB,TCAF1,SERPINB1,LRG1,CASTOR2,KLF13,CCDC71L,GPC5,MANF,PHF21A,SPTAN1,TPD52L1,DENND3,FNDC4,MAN2A1,RTN3,NPAS1,PAIP2B,ENO2,NCBP2,CASP10,TUBB4A,RNF187,HAX1,SOC1,MBNL2,CFH,DENDD1,HIVEP3,TMEM30A,ITPKA,SELENON,ACVR1,CCDC92,TARBP1,ITGB3,CORO2A,MEIS3,MVB12A,NUCB1,NCOA4,PCSK4,BRWD3,PTTG1,AGER,NIPSNAP2,MAP3K8,DGKD,ACER3,SORT1,ACADVL,LITAF,AZU1,PAPLN,PTPRC,DAB2,DENND4B,IDH1,GA1,IL6R,DIP2A,PSAP,SEMA6C,NFE2L3,POLG2,SLC4A11,ASAP2,H1-10,CCND3,PIK3CD,OAS3,EXOC2,RPS6KC1,DYNC2LI1,TS22D3,TSPYL2,SMYD3,HIP1R,ITPR2,ARFGAP1,SETD5,ARRB1,TNFRSF10B,BATF2,FECH,RAVER2,SMPDL3B,OSTF1,CD200R1,HJV,LTK,MMP14,OGT,MAP1A,TRIB3,PLP1,CHID1,GAS6,ZDHHC8,MYO5B,ADGRL3,NTRK1,RXFP1,GPR158,DENND11,LPAR2,GNG7,LGALS3,TAB2,TMEM116,WARS1,LMNA,IARS1,PLXNB2,IL13RA1,STX10,CEMIP2,VSTM4,CD55,YIPF5,RELL2,ZNF558,CAPN5,ITM2B,LDLRAP1,NBR1,RGL3,IQGAP3,MRAP2,TIAL1,PDIA3,PAFAH2,SCPEP1,GGT7,AMIGO2,KCNJ11,RBCK1,DNM1,EGLN3,DLK1,ADGRE2,PDGFB,MAST2,NIBAN2,PCOLCE,HDGFL3,GSTO1,STK16,DBP,CPEB4,GT2H4,BBS4,ELP1,SOX5,STX2,LAMB2,PI15,EMILIN2,GPSM3,PPP2R5B,AKNA,ERI1,VPS28,CELF2,SLC25A36,ISCU,SESN2,ATP1A2,C6ORF89,BMF,TSKU,SIAE,SMURF2,TNNI3,TUT7,CPNE3,GAS2,ZFYVE28,FLT4,MCF2,BTN3A2,KLF12,RBPMS,MTCL1,C3,PHGDH,GARNL3,RAB26,SLC4A7,PLPPR2,ACSL1,TMED4,ODF2L,ZNF608,CCM2,RTN4RL2,SCN1B,PLCD3,UNC119,ZMIZ1,RPH3AL,HIVEP2,SNPH,MAST1,GUCA1B,KCTD20,COL1A2,INPP5J,SALL2,ARHGEF40,BNIP3,KHK,HLA-B,ETAA1,ZNF396,GNB5,WASL,STOM,TCAF2,TCFL5,PEX2,SNTA1,THRB,SFMBT2,FGD1,FGFR4,MAPK8IP3,SEMA4G,SHFL,GIPC1,MLF1,RTKN2,GT2A1,ARID5B,ZNF117,ZP3,GPAT3,PKD1,HBP1,CUX1,MAPT,TBC1D20,CITED4,GEMIN2,MC4R,FMN1,SMAD6,SLC45A3,APAF1,GRN,EHD2,WBP1L,CCDC88B,APBB3,DUSP5,NOTUM,SEMA3E,SLC30A2,TMEM41B,ZKSCAN1,TENM1,EP8,WDR91,WDR11,LGMN,DNAJB11,CBLB,BBC3,TP53I11,CACNA2D2,SCFD1,PDK1,BCL9L,PRRC1,MGAT5,PDE7A,DLG3,ZNF133,DTNA,ZNF83,RHBD2,SEC24A,C2CD2L,PRCP,GTPBP1,TENT5A,RTN4R,RFLNB,SETD7,RAB31,STK4,PVR,UTRN,STON1,COL15A1,TLCD2,IMPA2,RTN2,SERGEF,TNFRSF1B,CR2,SYDE2,UFL1,GRL1,RB1CC1,PAX9,RAPGEF2,INPP4A,C18ORF54,ZNF467,TNK2,GPSM1,DCP2,PPP1R16B,MYORG,ATP1B2,LHFPL2,DEF8,NIM1K,RPS6KA1,MAP4K2,VPS16,GPD1L,THBD,SH3BP2,VBP1,CCSAP,ENTR1,SERTAD2,NYAP1,TTBK2,MXD3,USP18,ANAPC16,IRAK2,ADAM15</p> |
| GO:00301 | cell | 4.1124090924 | <p>HSPA5,FN1,TXNIP,LAMA3,HECW2,ADAMTSL4,DDIT4,PTK2B,GDF15,PIM1,FLNC,ANXA1,CARD11,CAPRIN2,PLD3,N</p>                                                                                                                                                                                                                                                                                                                                                                                                                                                                                                                                                                                                                                                                                                                                                                                                                                                                                                                                                                                                                                                                                                                                                                                                                                                                                                                                                                                                                                                                                                                                                                                                                                                                                                                                                                                                                                                                                                                                                                                                                                                                                                                                                                                                                                                                                                                                                                                                                                                                                                                                                                                                                                                                                                                                                                                                                                                       |

|            |                    |                        |                                                                                                                                                                                                                                                                                                                                                                                                                                                                                                                                                                                                                                                                                                                                                                                                                                                                                                                                                                                                                                                                                                                                                                                                                                                                                                                                                                                                                                                                                                                                                                                                                                                                                                                                                                                                                                                                                                     |
|------------|--------------------|------------------------|-----------------------------------------------------------------------------------------------------------------------------------------------------------------------------------------------------------------------------------------------------------------------------------------------------------------------------------------------------------------------------------------------------------------------------------------------------------------------------------------------------------------------------------------------------------------------------------------------------------------------------------------------------------------------------------------------------------------------------------------------------------------------------------------------------------------------------------------------------------------------------------------------------------------------------------------------------------------------------------------------------------------------------------------------------------------------------------------------------------------------------------------------------------------------------------------------------------------------------------------------------------------------------------------------------------------------------------------------------------------------------------------------------------------------------------------------------------------------------------------------------------------------------------------------------------------------------------------------------------------------------------------------------------------------------------------------------------------------------------------------------------------------------------------------------------------------------------------------------------------------------------------------------|
| 54         | differentiation    | 03464e-15              | <p>FASC,UNC5B,MAF,LAMB1,KLF10,HDAC9,LRP1,TGFB1,ANXA6,ABI3BP,SLC6A6,ATM,F11R,RAB6B,FLNB,TGM2,MKNK2,PPP1R13L,CD36,DYSF,MARCKS,CHAC1,VEGFA,EFHD1,ERBB3,PTK7,ITGAV,MRC2,TNFRSF9,ID3,SERPINH1,BTG2,TMOD1,SEMA6B,KDM6B,IL2RA,RYR1,CD46,BCL6,NHLH1,TTL7,SEPTIN6,SOC2,CELSR2,LGALS1,APOE,LAMA5,BHLHE40,ITGA5,TP53INP1,ATF3,IL15RA,CD24,MMP15,ALAS1,KRT8,COL11A1,NFATC4,ID1,RAB27A,IGF1,ITGB1,NLGN2,FGFR3,TFAP2B,WHRN,NECTIN2,CREB3L2,MBD2,BRSK1,SMAD3,B2M,MYRF,HDAC6,SEMA7A,GDI1,PCSK2,RBL2,GPC2,ROBO1,ACE,ACVR1C,EXT2,AFDN,CNN2,DMTN,CYP26B1,CDKN1C,SEMA3F,TRPM4,MYLK3,TNNT1,PTPRU,SKIL,GDPD5,SPEG,PGM3,PLXND1,NDRG2,HES7,PRKACA,EIF2AK1,GABBR1,AGRN,HLTF,PTPRS,SERPINI1,ATP7A,NDRG1,TEX19,MSI1,STAT5B,DNASE2,TGFBR3,SMARCA1,ULK1,GLI1,PTEN,ITM2C,MTURN,PDLIM7,CUL7,PKHD1,ALAS2,BTK,COL18A1,XK,SH3PXD2B,THOC2,LRP4,IFNGR1,CMTM7,TDRKH,LGALS9,CAMSAP3,MINK1,SEMA3A,ALDOC,CALR,BTBD2,RHBDD1,ITM2A,TSPO,FLT1,PTPRJ,PTPRF,TJP3,BCL3,OBSCN,POFUT2,SIDT2,MNX1,ITGB5,DLG4,PCDH15,ESRRB,DHTKD1,SLC37A4,CEBPD,NR2F6,IFITM1,TMOD2,TCIRG1,RHAG,ADGRA2,TUBB2B,HIP1,RRAS,CTSB,NFKB2,SH3TC2,DACT3,KLF7,IFT140,LMOD1,LRG1,KLF13,CCDC71L,MANF,MAN2A1,RTN3,HAX1,SOC2,HIVEP3,TMEM30A,ITPKA,SELENON,ACVR1,ITGB3,PCSK4,AGER,Sort1,ACADVL,AZU1,PTPRC,DAB2,IL6R,DIP2A,PSAP,SEMA6C,SLC4A11,PIK3CD,SMYD3,BATF2,FECH,LTKE,MMP14,OGT,MAP1A,TRIB3,PLP1,GAS6,ADGRL3,NTRK1,VCAN,RXFP1,LGALS3,LMNA,IARS1,PLXNB2,NBR1,TIAL1,KIF5A,DLK1,PDGFB,MAST2,NIBAN2,HDGFL3,BBS4,SOX5,STX2,LAMB2,PPP2R5B,AKNA,TSKU,TNNI3,TUT7,FLT4,MCF2,WIPF3,C3,PHGDH,SLC4A7,HOOK1,CCM2,RTN4RL2,SCN1B,ZMIZ1,SNPH,ROBO3,INPP5J,BNIP3,HLA-B,ACSL6,WASL,TCFL5,THRB,MAPK8IP3,SEMA4G,MLF1,RTKN2,ARID5B,ZP3,C1GALT1,CUX1,MAPT,TBC1D20,SMAD6,SLC45A3,APAF1,GRN,EHD2,WBP1L,SEMA3E,MDGA2,TENM1,DNAJB11,PPDPF,BCL9L,TPD52,TENT5A,RTN4R,RFLNB,STK4,TRAK2,COL15A1,TNFRSF1B,CR2,UFL1,GRHL1,TTC7A,RAPGEF2,TNK2,GPSM1,ACSBG2,PPP1R16B,MYORG,ATP1B2,RPS6KA1,NYAP1,TXNRD3,ADAM15</p> |
| GO:0048731 | system development | 1.3099091970582402e-14 | <p>HSPA5,FN1,LAMA3,HECW2,DDIT4,PTK2B,PIM1,ELAPOR2,AARS1,ANXA1,RNF213,CAPRIN2,NFASC,UNC5B,MAF,LAMB1,CLSTN3,HDAC9,LRP1,GADD45A,TGFB1,ANXA6,ABI3BP,ATM,ARG2,RAB6B,ASS1,TGM2,PPP1R13L,MARCKS,CHAC1,VEGFA,FUT1,EFHD1,ERBB3,PTK7,ITGAV,DMBX1,CTSZ,ID3,CALB1,SERPINH1,BTG2,TMOD1,SEMA6B,KDM6B,IL2RA,RYR1,BCL6,NHLH1,TTL7,SOC2,MICAL2,CELSR2,APOE,LAMA5,BHLHE40,ITGA5,ENO3,MFGE8,CD24,PALM,COL11A1,NFATC4,GIPR,ID1,IGF1,ITGB1,PITPNM1,NLGN2,CTSC,FGFR3,TFAP2B,WHRN,USP45,GAA,CREB3L2,MBOAT2,BRSK1,SMAD3,B2M,MYRF,HDAC6,SEMA7A,ATF6,GDI1,PCK2,GPC2,ROBO1,CDKN1A,ACE,ACVR1C,PCLO,EXT2,CYP26B1,AMOTL1,CXCL8,CDKN1C,SEMA3F,MYLK3,SKIL,GDPD5,KDM7A,PLXND1,NDRG2,HES7,PRKACA,AGRN,HLTF,PTPRS,SERPINI1,ATP7A,NDRG1,TEX19,MSI1,STAT5B,NUP107,TGFBR3,SMARCA1,ULK1,GLI1,PTEN,ITM2C,RAB18,PDLIM7,KMT5C,CUL7,GSN,PKHD1,ADGRL1,COL18A1,XK,SH3PXD2B,THOC2,LRP4,IFNGR1,LGALS9,CAMSAP3,MINK1,RNF103,SEMA3A,CALR,BTBD2,TSPO,FLT1,IGSF8,PTPRF,SELENOP,SYBU,PAPSS1,NES,INPPL1,BCL3,SIDT2,MNX1,DLG4,PCDH15,UCP2,RCN3,NR2F6,PDLIM4,TMOD2,CYP26A1,WNK4,TCIRG1,HLA-E,ADGRA2,TUBB2B,SPARC,SLC17A7,THBS1,RRAS,NFKB2,SH3TC2,TRIM3,KLF7,IFT140,PPIB,LRG1,MANF,MAN2A1,RTN3,NPAS1,TMEM30A,ITPKA,SELENON,ACVR1,ITGB3,MEIS3,NCOA4,AGER,ACER3,AZU1,PTPRC,DAB2,IDH1,I</p>                                                                                                                                                                                                                                                                                                                                                                                                                                                                                                                                                                                                                                                                    |

|            |                                           |                       |                                                                                                                                                                                                                                                                                                                                                                                                                                                                                                                                                                                                                                                                                                                                                                                                                                                                                                                                                                                                                                                                                                                                                                                                                                                                                                                                                                                                                                                                                                                                                                                                                                                                                                                                                                                                                                                                                                                                                                                                                                                                                                                                                                                                                                                                                                                                                                                                        |
|------------|-------------------------------------------|-----------------------|--------------------------------------------------------------------------------------------------------------------------------------------------------------------------------------------------------------------------------------------------------------------------------------------------------------------------------------------------------------------------------------------------------------------------------------------------------------------------------------------------------------------------------------------------------------------------------------------------------------------------------------------------------------------------------------------------------------------------------------------------------------------------------------------------------------------------------------------------------------------------------------------------------------------------------------------------------------------------------------------------------------------------------------------------------------------------------------------------------------------------------------------------------------------------------------------------------------------------------------------------------------------------------------------------------------------------------------------------------------------------------------------------------------------------------------------------------------------------------------------------------------------------------------------------------------------------------------------------------------------------------------------------------------------------------------------------------------------------------------------------------------------------------------------------------------------------------------------------------------------------------------------------------------------------------------------------------------------------------------------------------------------------------------------------------------------------------------------------------------------------------------------------------------------------------------------------------------------------------------------------------------------------------------------------------------------------------------------------------------------------------------------------------|
|            |                                           |                       | <p>L6R,DIP2A,PSAP,SEMA6C,PIK3CD,HIP1R,SETD5,LTK,MMP14,MAP1A,PLP1,GAS6,ADGRL3,NTRK1,VCAN,RXFP1,TAB2,WARS1,LMNA,PLXNB2,CEMIP2,VSTM4,ITM2B,KIF5A,AMIGO2,PDGFB,NIBAN2,HDGFL3,BBS4,SOX5,LAMB2,EMILIN2,PPP2R5B,AKNA,ATP1A2,TSKU,TNNI3,GAS2,FLT4,MCF2,C3,PHGDH,RAB26,SLC4A7,CCM2,RTN4RL2,SCN1B,PLCD3,UNC119,ZMIZ1,SNPH,MAST1,ROBO3,COL1A2,INPP5J,SALL2,BNIP3,HLA-B,ACSL6,WASL,THRB,MAPK8IP3,SEMA4G,ARID5B,ZP3,PKD1,C1GALT1,CUX1,MAPT,TBC1D20,SMAD6,SLC45A3,APAF1,GRN,NOTUM,SEMA3E,TMEM41B,MDGA2,TENM1,ACAT1,WDR11,DNAJB11,CBLB,PRCP,RTN4R,RFLNB,STK4,TRAK2,COL15A1,BPNT1,TNFRSF1B,UFL1,RB1CC1,RAPGEF2,GPSM1,PPP1R16B,ATP1B2,RPS6KA1,NYAP1,TTBK2,ADAM15</p>                                                                                                                                                                                                                                                                                                                                                                                                                                                                                                                                                                                                                                                                                                                                                                                                                                                                                                                                                                                                                                                                                                                                                                                                                                                                                                                                                                                                                                                                                                                                                                                                                                                                                                                                                    |
| GO:0048518 | positive regulation of biological process | 3.137304948029567e-14 | <p>HSPA5,FN1,TXNIP,ARRDC4,KSR1,ADAMTSL4,DDIT4,PTK2B,GDF15,PIM1,ELAPOR2,ANXA1,CA2,CARD11,CAPRIN2,ST6GAL1,UNC5B,MAF,LAMB1,CLSTN3,KLF10,IL10RA,HDAC9,LRP1,EEF1A2,TSC22D1,GADD45A,TGFB1,EPHX2,ABI3BP,SLC6A6,ATM,ARG2,F11R,EPB41L2,ASS1,TGM2,HERPUD1,PPP1R13L,CD36,VEGFA,FUT1,ERBB3,OPTN,PTK7,ITGAV,TEAD1,ID3,ATP2A3,CALB1,LMAN1,BTG2,SEMA6B,KDM6B,IL2RA,ADAM19,CD46,BCL6,NHLH1,F2R,RIMS3,SOC2,MLXIP,MICAL2,LGALS1,APOE,GOLGA2,HRC,DSYK,ITGA5,TP53INP1,TRDN,ATF3,MFGE8,IL15RA,CD24,RASGEF1A,PALM,MLXIPL,BST2,SESN3,RAB3B,NFATC4,GIPR,ID1,CTCF, RAB27A,IGF1,HELZ2,MAPRE3,ITGB1,MAGI1,MALAT1,NLGN2,CTSC,FGFR3,VPS13D,TFAP2B,G0S2,NTS,WHRN,INHBE,NECTIN2,PLEKHA4,CREB3L2,SMAD3,AP2M1,EDEM1,B2M,PSME1,MYRF,PRKAB2,SVIP,HDAC6,SEMA7A,ATF6,GDI1,PCK2,GPC2,ROBO1,CDKN1A,ACE,TBC1D5,ACVR1C,AFDN,CNN2,DMTN,CYP26B1,CXCL8,CDKN1C,SEMA3F,TRPM4,BAIAP3,MYLK3,ABCA7,PTPRU,SLC44A2,SKIL,POMT1,GDPD5,PAN2,KDM7A,BTN3A1,PLXND1,PRKACA,PSRC1,MIF4GD,GABBR1,AGRN,HLTF,PTPRS,WIPI1,SERPINI1,ATP7A,SHC2,NSD3,CAMTA2,STAT5B,SH2D3A,IFIH1,TGFBR3,SMARCA1,ULK1,GLI1,PTEN,LRSAM1,ITM2C,MTURN,PDLIM7,TMPRSS4,KMT5C,CUL7,GSN,PKHD1,NFE2,DRAP1,BTK,CTIF,ADGRL1,LRP4,IFNGR1,RNF217,LGALS9,MINK1,SEMA3A,SLC22A5,CLYBL,DDHD2,CALR,RHBD1,TSPO,AURKB,FLT1,TMED9,PTPRJ,MORF4L2,ARL6IP5,MACC1,NES,BCL3,TRIM38,POFUT2,ARHGAP8,CHST2,MARCHF2,CORO7,DLG4,ESRRB,UCP2,CEBPD,RCN3,MLLT11,IFITM1,TMOD2,WNK4,CYLD,TCIRG1,HLA-E,RBM22,AHCYL1,ANKIB1,NCOA7,ADGRA2,TUBB2B,HIP1,ERFE,SPARC,CC2D1A,PLA2G6,THBS1,CCND2,RRAS,TME M9,NFKB2,CALCOCO1,KLF7,PDE4DIP,SEC22B,MAP3K9,LMOD1,PIDD1,ZNF175,TKFC,PIIB,TCAF1,LRG1,KLF13,CDC71L,GPC5,TPD52L1,MAN2A1,NCBP2,CASP10,RNF187,HAX1,SOC1,CFH,HIVEP3,TMEM30A,ITPKA,SELENON,ACVR1,ITGB3,MEIS3,NCOA4,AGER,NIPSNAP2,MAP3K8,DGKD,ACER3,LITAF,AZU1,PTPRC,DAB2,GGA1,IL6R,DIP2A,SEMA6C,POLG2,CCND3,PIK3CD,OAS3,SMYD3,HIP1R,ARRB1,TNFRSF10B,SMPDL3B,HJV,LTK,MMP14,OGT,MAP1A,TRIB3,PLP1,GAS6,ZDHHC8,NTRK1,LPAR2,LGALS3,TAB2,WARS1,LMNA,PLXNB2,IL13RA1,CD55,RELL2,LDLRAP1,IQGAP3,MRAP2,TIAL1,PDIA3,AMIGO2,RBCK1,EGLN3,ADGRE2,PDGFB,NIBAN2,PCOLCE,GSTO1,STK16,DBP,BBS4,SOX5,LAMB2,EMILIN2,GPSM3,PPP2R5B,AKNA,VPS28,ISCU,SESN2,ATP1A2,C6ORF89,BMF,TSKU,SMURF2,TUT7,C PNE3,FLT4,BTN3A2,KLF12,RBPMS,MTCL1,C3,ACSL1,TMED4,SCN1B,UNC119,ZMIZ1,RPH3AL,GUCA1B,KCTD20,SALL2,BNIP3,HLA-B,ETAA1,WASL,STOM,TCAF2,THRB,FGFR4,MAPK8IP3,SEMA4G,GIPC1,RTKN2,GTf2A1,ARID5B,ZP3,PKD1,CUX1,MAPT,TBC1D20,CITED4,MC4R,SMAD6,SLC45A3,APAF1,GR</p> |

|            |                          |                      |                                                                                                                                                                                                                                                                                                                                                                                                                                                                                                                                                                                                                                                                                                                                                                                                                                                                                                                                                                                                                                                                                                                                                                                                                                                                                                                                                                                                                                                                                                                                                                                                                                                                                                                                                                                                                                                                                                                                                                                                                                                                                                                                                                                                                                                                                                                                                                                                                                                                                                                                                                                                                                                                                                                                                                                                                                                                                                                                                             |
|------------|--------------------------|----------------------|-------------------------------------------------------------------------------------------------------------------------------------------------------------------------------------------------------------------------------------------------------------------------------------------------------------------------------------------------------------------------------------------------------------------------------------------------------------------------------------------------------------------------------------------------------------------------------------------------------------------------------------------------------------------------------------------------------------------------------------------------------------------------------------------------------------------------------------------------------------------------------------------------------------------------------------------------------------------------------------------------------------------------------------------------------------------------------------------------------------------------------------------------------------------------------------------------------------------------------------------------------------------------------------------------------------------------------------------------------------------------------------------------------------------------------------------------------------------------------------------------------------------------------------------------------------------------------------------------------------------------------------------------------------------------------------------------------------------------------------------------------------------------------------------------------------------------------------------------------------------------------------------------------------------------------------------------------------------------------------------------------------------------------------------------------------------------------------------------------------------------------------------------------------------------------------------------------------------------------------------------------------------------------------------------------------------------------------------------------------------------------------------------------------------------------------------------------------------------------------------------------------------------------------------------------------------------------------------------------------------------------------------------------------------------------------------------------------------------------------------------------------------------------------------------------------------------------------------------------------------------------------------------------------------------------------------------------------|
|            |                          |                      | <i>N, EHD2, WBP1L, CCDC88B, APBB3, SEMA3E, SLC30A2, TENM1, EPS8, LGMN, CBLB, BBC3, BCL9L, PRRC1, MGAT5, DLG3, SEC24A, C2CD2L, GTPBP1, TENT5A, RTN4R, RAB31, STK4, PV R, UTRN, TNFRSF1B, CR2, UFL1, GRHL1, RB1CC1, PAX9, RAPGEF2, TNK2, GPSM1, DCP2, PPP1R16B, MYORG, ATP1B2, LHFPL2, DEF8, RPS6KA1, MAP4K2, GPD1L, THBD, ENTR1, SERTA D2, IRAK2</i>                                                                                                                                                                                                                                                                                                                                                                                                                                                                                                                                                                                                                                                                                                                                                                                                                                                                                                                                                                                                                                                                                                                                                                                                                                                                                                                                                                                                                                                                                                                                                                                                                                                                                                                                                                                                                                                                                                                                                                                                                                                                                                                                                                                                                                                                                                                                                                                                                                                                                                                                                                                                         |
| GO:0050920 | regulation of chemotaxis | 0.048599062309295976 | <i>PTK2B, ST6GAL1, VEGFA, SEMA6B, SMAD3, HDAC6, SEMA7A, ROBO1, CXCL8, SEMA3F, LGALS9, SEMA3A, CALR, ADGRA2, TUBB2B, THBS1, AGER, AZU1, IL6R, SEMA6C, GAS6, PDGFB, GPSM3, SEMA4G, SEMA3E, LGMN</i>                                                                                                                                                                                                                                                                                                                                                                                                                                                                                                                                                                                                                                                                                                                                                                                                                                                                                                                                                                                                                                                                                                                                                                                                                                                                                                                                                                                                                                                                                                                                                                                                                                                                                                                                                                                                                                                                                                                                                                                                                                                                                                                                                                                                                                                                                                                                                                                                                                                                                                                                                                                                                                                                                                                                                           |
| <b>CC</b>  |                          |                      |                                                                                                                                                                                                                                                                                                                                                                                                                                                                                                                                                                                                                                                                                                                                                                                                                                                                                                                                                                                                                                                                                                                                                                                                                                                                                                                                                                                                                                                                                                                                                                                                                                                                                                                                                                                                                                                                                                                                                                                                                                                                                                                                                                                                                                                                                                                                                                                                                                                                                                                                                                                                                                                                                                                                                                                                                                                                                                                                                             |
| GO:0005737 | cytoplasm                | 9.52511254351904e-51 | <i>HSPA5, FN1, TXNIP, LAMA3, ARRDC4, CISH, KSR1, HECW2, ADAMTSL4, FCGR2A, DDIT4, PTK2B, GDF15, PIM1, AARS1, FLNC, ANXA1, RNF213, CA2, HSP90B1, KIF21B, CARD11, CAPRIN2, PLD3, GFPT1, ST6GAL1, NFASC, REEP6, MAF, LAMB1, CLSTN3, LAPTM4B, SCG3, IL10RA, WSB1, HDAC9, LRP1, EEF1A2, TSC22D1, RGS10, GADD45A, TGFB1, EPHX2, ANXA6, ATM, ARG2, PLEKHH2, IVNS1ABP, NIPSNAP1, RAB6B, UBE2L6, FLNB, EPB41L2, ASS1, EML2, TGM2, MKNK2, HERPUD1, PPP1R13L, CD36, AIF1L, CRAT, PTGS1, TMCC2, DYSF, APOL1, AKAP11, MARCKS, ANKZF1, CHAC1, MCFD2, VEGFA, FUT1, EFHD1, GMPPA, GALNT12, OPTN, USP20, ITGAV, CTSZ, GTPBP2, ID3, ADD3, ATP2A3, FAM193B, CALB1, ERMN, ZMYM2, SERPINH1, LMAN1, BTG2, TMOD1, BLVRB, RYR1, ADAM19, SEC24D, REEP2, HYOU1, TKTL1, CD46, BCL6, TTLL7, STARD9, FAM83A, F2R, RIMS3, SEPTIN6, RAB11FIP1, SOCS2, MLXIP, MICAL2, CELSR2, MYO1D, LGALS1, APOE, P4HA1, PTPDC1, GOLGA2, BHLHE40, HRC, DSTYK, ULBP1, FBNP1, ITGA5, DEPP1, MAP7D1, PDIA4, TP53INP1, LLGL2, TRDN, ENO3, PYCR2, MFGE8, CALU, IL15RA, RASGEF1A, RFK, RHOTB1, PALM, MLXIPL, PTAR1, BST2, B4GALNT4, GRAP2, ABCG2, ALAS1, LPCAT4, KR T8, SESN3, IDH2, APOL6, COL11A1, RAB3B, NFATC4, ID1, CTCFL, RAB27A, RHPN1, IGF1, PYGL, UBE2H, NUDT4, HELZ2, MAPRE3, ITGB1, MAGI1, PITPNM1, NLGN2, CTSC, FGFR3, PP P1R14C, G0S2, NTS, WHRN, MICAL1, USP45, MUC4, GAA, PLEKHA4, CREB3L2, MBOAT2, BRSK1, PLOD2, TM6SF1, SMAD3, A P2M1, EDEM1, POLI, B2M, PSME1, LYPLA1, MYRF, PROS1, PR KAB2, SVIP, HDAC6, PGHG, ARHGEF12, SDC3, ULBP2, ATF6, TMEM70, GDI1, PCK2, NUDT12, TMEM63A, RBL2, GPC2, ROBO1, CDKN1A, ACE, ATP8B3, UBAC1, TMEM241, TBC1D5, PCLO, EXT2, ZNF397, AFDN, SDF2L1, CNN2, DMTN, CYP26B1, PXX, AMOTL1, CDKN1C, LARGE2, CDC42SE1, TRPM4, BAIAP3, MYLK3, ABCA7, ACAD10, TNNT1, KCNAB2, ACSF2, SLC44A2, PTPRH, SKIL, POMT1, GDDP5, PAN2, PEGR, TMEM106C, HMGCL, PGM3, COLGALT2, DOCK6, CRYZL1, NDRG2, PRKACA, EIF2AK1, MYBPHL, PSRC1, ADCY3, MIF4GD, GABBR1, AGRN, HLTFF, PTPRS, FASTKD1, WIPI1, SERPINI1, ATP7A, MT2A, NDRG1, TEX19, YPEL5, SHC2, DNAH14, MSI1, STAT5B, DUSP8, NUP107, PROCR, DNASE2, CYP2R1, IFIH1, TGFB3, FBXL16, ULK1, GLI1, PTEN, TDO2, LRSAM1, CYSTM1, ITM2C, MTURN, RAB18, PDLIM7, TMPRSS4, KHNYN, CUL7, GSN, PKHD1, NFE2, ALAS2, PPP1R18, BTK, CTIF, COL18A1, SMIM14, GABARAPL1, XK, ALS2CL, TIA1, SH3PXD2B, TTC37, SELENBP1, ANKRD9, RGS16, KLF9, RNF217, TDRKH, LGALS9, CAMSAP3, MINK1, RN F103, SH3GLB2, NFE2L1, ETFDH, COTL1, SLC31A1, NDUFA10, SLC22A5, HACE1, ALDOC, QSOX1, CLYBL, SPPL2B, PITPN C1, P4HA2, SLC25A42, DDHD2, CALR, BTBD2, RHBDD1, AMFR, ITM2A, TSPO, AURKB, FLT1, AMPD2, TMED9, MAGED2, PTPR J, SELENOP, PDIA6, PRSS16, PLEKHA8, SYBU, ARL6IP5, NE K9, MACC1, PAPSS1, YIF1B, NES, AGPAT4, INPPL1, BCL3, T RIM38, HID1, OBSCN, POFUT2, SIDT2, ARHGAP8, CHST2, KY NU, MARCHF2, LSM4, MNX1, ITGB5, CORO7, DLG4, STK10, PC DH15, ESRRB, UCP2, DHTKD1, CCDC113, SLC37A4, C4ORF46, RCN3, LDAF1, MLLT11, PDLIM4, ACBD4, IFITM1, TMOD2, C</i> |

|            |                     |                       |                                                                                                                                                                                                                                                                                                                                                                                                                                                                                                                                                                                                                                                                                                                                                                                                                                                                                                                                                                                                                                                                                                                                                                                                                                                                                                                                                                                                                                                                                                                                                                                                                                                                                                                                                                                                                                                                                                                                                                                                                                                                                                                                                                                                                                                                                                                                                                                                                                                                                                                                                                                                                                                                                            |
|------------|---------------------|-----------------------|--------------------------------------------------------------------------------------------------------------------------------------------------------------------------------------------------------------------------------------------------------------------------------------------------------------------------------------------------------------------------------------------------------------------------------------------------------------------------------------------------------------------------------------------------------------------------------------------------------------------------------------------------------------------------------------------------------------------------------------------------------------------------------------------------------------------------------------------------------------------------------------------------------------------------------------------------------------------------------------------------------------------------------------------------------------------------------------------------------------------------------------------------------------------------------------------------------------------------------------------------------------------------------------------------------------------------------------------------------------------------------------------------------------------------------------------------------------------------------------------------------------------------------------------------------------------------------------------------------------------------------------------------------------------------------------------------------------------------------------------------------------------------------------------------------------------------------------------------------------------------------------------------------------------------------------------------------------------------------------------------------------------------------------------------------------------------------------------------------------------------------------------------------------------------------------------------------------------------------------------------------------------------------------------------------------------------------------------------------------------------------------------------------------------------------------------------------------------------------------------------------------------------------------------------------------------------------------------------------------------------------------------------------------------------------------------|
|            |                     |                       | <p>YP26A1,SLC25A29,P2RX6,WNK4,COPB1,CYLD,SYT5,TCIRG1,HLA-E,SIL1,GUK1,RBM22,AHCYL1,ANKIB1,MROH1,TUBB2B,HIP1,KIF1B,SPARC,LONRF2,FGFR10P2,CC2D1A,PLA2G6,SLC17A7,THBS1,CCND2,IL32,TMEM9,CTSB,NFKB2,SH3TC2,CALCOCO1,SMAP2,DACT3,TRIM3,KLF7,PDE4DIP,DMXL2,IFT140,SEC22B,WDR26,PKD4,COPG1,LMOD1,PIDD1,ZNF175,NDUFB4,TKFC,PPIB,SERPINB1,LRG1,CASTOR2,GPC5,MANF,SPTAN1,XYL2,TPD52L1,DENND3,EPHX1,FNDC4,NIT1,MAN2A1,RTN3,PAIP2B,ENO2,NCBP2,HEXD,CASP10,TUBB4A,RNF187,HAX1,PDIA5,SOCS1,MBNL2,DBND1,HIVEP3,TMEM30A,ITPKA,SELENON,ACSS2,CCDC92,ITGB3,SNX16,MVB12A,NUCB1,NCOA4,MYO15B,PCSK4,PTTG1,NIPSNAP2,MAP3K8,DGKD,ACER3,SORT1,SAT2,ACADVL,LITAF,AZU1,PTPRC,DAB2,DENND4B,IDH1,GGA1,NBEAL1,DIP2A,EHBP1,NT5C2,PSAP,SEMA6C,POLG2,ASAP2,PHKA1,CERCAM,CCND3,PIK3CD,OAS3,EXOC2,GALNT5,RPS6KC1,GSDMB,DYNC2LI1,TSC22D3,REEP4,TSPYL2,SMYD3,AP3M2,OCEL1,HIP1R,ITPR2,ARFGAP1,ASMTL,ARRB1,TMEM50B,MAN1B1,FECH,TRIQK,RAVER2,ENGASE,FBXO44,OSTF1,COG6,MMP14,OGT,MAP1A,MAN2B1,TRIB3,CLIP2,CHID1,GAS6,ZDHHC8,MYO5B,PPFIA4,NTRK1,VCAN,CHPF,DENND11,LPAR2,LGALS3,TAB2,WARS1,PHKB,CRYL1,LMNA,CCDC50,IARS1,BSDC1,GDE1,STX10,CEMIP2,CD55,YIPF5,CAPN5,ITM2B,ABCB9,UTF2E2,FDXR,LDLRAP1,NBR1,RLG3,CENPH,IQGA3,MRAP2,PCYOX1L,TIAL1,ARVCF,PDIA3,KIF5A,PAFAH2,SCPEP1,PIGS,SPATS2,RBCK1,HAGH,DNM1,EGLN3,DLK1,PDGFB,MAST2,NIBAN2,HDGFL3,KPNA5,GSTO1,STK16,GALK2,CPEB4,FAM234B,BBS4,ELP1,STX2,LAMB2,SFXN5,ERP44,DCLRE1B,GPSM3,PPP2R5B,AKNA,ERI1,VPS28,DIPK1A,OGA,CELF2,SLC25A36,ISCU,SESN2,ATP1A2,C6ORF89,TMED7,BMF,YIPF2,SIAE,SMTN,SMURF2,TNNI3,TUT7,CLCA1,CPNE3,GAS2,ZFYVE28,HBMK1,FLT4,PANK4,MCF2,KLF12,RBPMS,WIPF3,MTCL1,C3,ANO5,PHGDH,DCAF8,TMEM143,GARNL3,ZCRB1,RAB26,ACSL1,PFKFB4,TSPAN33,HOKK1,TMED4,ODF2L,DZIP3,CCM2,RABAC1,MAN1A1,HSPA4L,YARS1,PLCD3,NAT8L,UNC119,ZMIZ1,RPH3AL,SNPH,ANGEL1,MAST1,KCTD20,COL1A2,STARD10,INPP5J,TUBE1,ARHGEF40,BNIP3,KHK,PIGB,ETAAL,ACSL6,ZNF396,PHYKPL,GNB5,WASL,STOM,GOLM2,PEX2,SNTA1,CTBS,SFMBT2,FGD1,FGFR4,MAPK8IP3,SHFL,STARD5,GIPC1,MLF1,RTKN2,UTF2A1,GPAT3,PKD1,C1GALT1,GAL3ST4,A4GALT,CUX1,MAPT,SNX2,TBC1D20,CITED4,GEMIN2,MC4R,FMNL1,SMAD6,MORN4,APAF1,GRN,EHD2,CCDC88B,APBB3,RAB24,DUSP5,NOTUM,SLC30A2,TMEM41B,TENM1,EPS8,RNF11,WDR91,ACAT1,WDR11,LGMN,DNAJB11,EHHADH,ERO1B,ST3GAL5,RNF145,CBLB,BBC3,SCFD1,PKD1,PRRC1,MGAT5,PDE7A,DLG3,MTND4L,DTNA,TPD52,RHBDD2,SEC24A,C2CD2L,PRCP,GTPBP1,TENT5A,RTN4R,NIPA1,RFLNB,TUBB1,RAB31,STK4,TRAK2,PVR,UTRN,STON1,COL15A1,RPL27,IMPA2,FADS3,CD93,B4GALT4,TTL3,GALNT10,RTN2,SERGEF,BPNT1,TNFRSF1B,SYDE2,UFL1,RB1CC1,ACAD11,TTC7A,RAPGEF2,FUCA1,INPP4A,ANO8,TNK2,GPSM1,ACSBG2,DCP2,PPP1R16B,EPS15,MYORG,ATP1B2,LHFPL2,RPS6KA1,MAP4K2,VPS16,DCTN4,GPD1L,THBD,VBP1,CCSAP,ENTR1,SERTAD2,TTBK2,USP18,ANAPC16,IRAK2,TXNRD3,HEPH,RSPH3,ADAM15</p> |
| GO:0012505 | endomembrane system | 1.749245117720525e-33 | <p>HSPA5,FN1,LAMA3,ARRDC4,KSR1,ADAMTSL4,FCGR2A,GDF15,ANXA1,HSP90B1,PLD3,ST6GAL1,NFASC,AIG1,REEP6,LAMB1,CLSTN3,LAPTM4B,SCG3,LRP1,TGFB1,ANXA6,RAB6B,ASS1,TGM2,HERPUD1,CD36,CRAF,PTGS1,TMCC2,DYSF,APOL1,CHAC1,MCFD2,VEGFA,FUT1,GALNT12,OPTN,ITGAV,CTSZ,GTPBP2,ATP2A3,SERPINH1,LMAN1,RYR1,ADAM19,SEC24D,REEP2,HYOU1,CD46,BCL6,F2R,SEPTIN6</p>                                                                                                                                                                                                                                                                                                                                                                                                                                                                                                                                                                                                                                                                                                                                                                                                                                                                                                                                                                                                                                                                                                                                                                                                                                                                                                                                                                                                                                                                                                                                                                                                                                                                                                                                                                                                                                                                                                                                                                                                                                                                                                                                                                                                                                                                                                                                                  |



|            |         |                       |                                                                                                                                                                                                                                                                                                                                                                                                                                                                                                                                                                                                                                                                                                                                                                                                                                                                                                                                                                                                                                                                                                                                                                                                                                                                                                                                                                                                                                                                                                                                                                                                                                                                                                                                                                                                                                                                                                                                                                                                                                                                                                                                                                                                                                  |
|------------|---------|-----------------------|----------------------------------------------------------------------------------------------------------------------------------------------------------------------------------------------------------------------------------------------------------------------------------------------------------------------------------------------------------------------------------------------------------------------------------------------------------------------------------------------------------------------------------------------------------------------------------------------------------------------------------------------------------------------------------------------------------------------------------------------------------------------------------------------------------------------------------------------------------------------------------------------------------------------------------------------------------------------------------------------------------------------------------------------------------------------------------------------------------------------------------------------------------------------------------------------------------------------------------------------------------------------------------------------------------------------------------------------------------------------------------------------------------------------------------------------------------------------------------------------------------------------------------------------------------------------------------------------------------------------------------------------------------------------------------------------------------------------------------------------------------------------------------------------------------------------------------------------------------------------------------------------------------------------------------------------------------------------------------------------------------------------------------------------------------------------------------------------------------------------------------------------------------------------------------------------------------------------------------|
|            |         |                       | <p>,RAB11FIP1,MYO1D,LGALS1,APOE,P4HA1,GOLGA2,HRC,ULBP1,FNBP1,ITGA5,PDIA4,TRDN,MFGE8,CALU,IL15RA,RHOBTB1,BST2,B4GALNT4,GRAP2,LPCAT4,COL11A1,RA B3B,ID1,RAB27A,IGF1,PYGL,ITGB1,PITPNM1,CTSC,FGFR3,NTS,MUC4,GAA,CREB3L2,MBOAT2,BRSK1,PLOD2,SMAD3,AP2M1,EDEM1,B2M,LYPLA1,MYRF,PROS1,SVIP,HDAC6,SDC3,ULBP2,ATF6,GDI1,TMEM63A,GPC2,ACE,ATP8B3,UBAC1,TMEM241,TBC1D5,EXT2,SDF2L1,CNN2,DMTN,CYP26B1,LARGE2,TRPM4,BAIAP3,ABCA7,KCNAB2,SLC44A2,SKIL,POMT1,GDPD5,TMEM106C,COLGALT2,NDRG2,PRKACA,ADCY3,MIF4GD,GABBR1,AGRN,PTPRS,WIPI1,SERPINI1,ATP7A,NDRG1,YPEL5,NUP107,CYP2R1,ULK1,CYSTM1,ITM2C,RAB18,TMPRSS4,CUL7,GSN,PKHD1,COL18A1,S MIM14,GABARAPL1,XK,MINK1,RNF103,NFE2L1,COTL1,SLC31A1,HACE1,ALDOC,QSOX1,SPPL2B,P4HA2,DDHD2,CALR,RHBDD1,AMFR,ITM2A,TSPO,FLT1,TMED9,MAGED2,PTPRJ,SELENOP,PDIA6,PRSS16,PLEKHA8,SYBU,ARL6IP5,YIF1B,AGPAT4,INPPL1,HID1,POFUT2,CHST2,MARCHF2,CORO7,DLG4,STK10,SLC37A4,RCN3,LDAF1,PDLIM4,CYP26A1,COPB1,SYT5,TCIRG1,HLA-E,SIL1,AHCYL1,HIP1,KIF1B,SPARC,SLC17A7,THBS1,CND2,TMEM9,CTSB,SH3TC2,TRIM3,PDE4DIP,DMXL2,SEC22B,COPG1,PIDD1,PPIB,SERPINB1,LRG1,GPC5,MANF,SP TAN1,XYL2,EPHX1,FNDC4,MAN2A1,RTN3,HAX1,PDIA5,TMEM30A,SELENON,ITGB3,SNX16,MVB12A,NUCB1,PCSK4,DGKD,ACER3,SORT1,LITAF,AZU1,PTPRC,DAB2,DENND4B,IDH1,GGA1,EHBP1,PSAP,ASAP2,CERCAM,GALNT5,RP S6KC1,DYNC2LI1,REEP4,AP3M2,HIP1R,ITPR2,ARFGAP1,ARRB1,TMEM50B,MAN1B1,TRIQK,OSTF1,COG6,MMP14,M AN2B1,CHID1,GAS6,ZDHHC8,MYO5B,NTRK1,VCAN,CHPF, LGALS3,TAB2,LMNA,STX10,CD55,YIPF5,ITM2B,ABC9,LDLRAP1,NBR1,MRAP2,PCYOX1L,PDIA3,PAFAH2,PIGS,P DGFB,STK16,CPEB4,FAM234B,STX2,LAMB2,ERP44,VPS28,DIPK1A,ATP1A2,C6ORF89,TMED7,BMF,YIPF2,CLCA1,CPNE3,ZFYVE28,NEMP2,C3,ANO5,RAB26,ACSL1,TSPAN33,TMED4,RABAC1,MAN1A1,NAT8L,RPH3AL,ANGEL1,COL1A2,BNIP3,PIGK,HLA-B,ACSL6,STOM,GOLM2,FGD1,FGFR4,MAPK8IP3,GIPC1,G PAT3,PKD1,C1GALT1,GAL3ST4,A4GALT,CUX1,SNX2,TBC1D20,SMAD6,APAF1,GRN,EHD2,CCDC88B,RAB24,NOTUM,SLC30A2,TMEM41B,TENM1,RNF11,WDR91,WDR11,LGMN,D NAJB11,ERO1B,ST3GAL5,RNF145,BBC3,SCFD1,PRRC1,M GAT5,TPD52,RHBDD2,SEC24A,C2CD2L,PRCP,RTN4R,SH3 BGRL2,NIPA1,RAB31,TRAK2,STON1,COL15A1,RPL27,FA DS3,CD93,B4GALT4,GALNT10,RTN2,TNFRSF1B,UFL1,RB1CC1,RAPGEF2,FUCA1,INPP4A,ANO8,TNK2,GPSM1,EPS15,MYORG,LHFPL2,GTFC3,MAP4K2,VPS16,ENTR1,IRAK2,TXNRD3,ADAM15</p> |
| GO:0031982 | vesicle | 1.445498078836667e-28 | <p>HSPA5,FN1,LAMA3,ARRDC4,FCGR2A,GDF15,AARS1,ANXA1,CA2,HSP90B1,KIF21B,CARD11,PLD3,GFPT1,NFASC,REEP6,LAMB1,LAPTM4B,SCG3,LRP1,TGFB1,EPHX2,ANXA6,ATM,F11R,RAB6B,FLNB,EPB41L2,ASS1,TGM2,CD36,AIF1L,PTGS1,DYSF,MARCKS,MCFD2,VEGFA,GMPPA,OPTN,ITGAV,CTSZ,GTPBP2,CALB1,ERMN,LMAN1,BTG2,BLVRB,RYR1,SEC24D,HYOU1,CD46,F2R,SEPTIN6,RAB11FIP1,MYO1D,LGALS1,APOE,LAMA5,GOLGA2,FNBP1,ITGA5,PDIA4,TP53INP1,ENO3,MFGE8,CALU,IL15RA,RHOBTB1,PALM,BST2,GRAP2,GPR155,KRT8,IDH2,RAB3B,RAB27A,IGF1,PYGL,ITGB1,CTSC,FGFR3,VPS13D,NTS,NECTIN2,MUC4,GAA,BRSK1,PLOD2,AP2M1,B2M,PSME1,LYPLA1,PROS1,SVIP,HDAC6,ARHGEF12,TMEM63A,RBL2,ACE,ATP8B3,UBAC1,TBC1D5,PCLO,EXT2,CNN2,DMTN,AMOTL1,BAIAP3,ABCA7,BCAM,KCNAB2,SLC44A2,SKIL,POMT1,CPD,NDRG2,PRKACA,GABBR1,AGRN,PTPRS,WIPI1,SERPINI1,ATP7A,NDRG1,YPEL5,PROCR,DNASE2,TGFBR3,ULK1,SERINC2,CYSTM1,ITM2C,RAB18,TMPRSS4,GSN,PKHD1,BTK,COL18A1</p>                                                                                                                                                                                                                                                                                                                                                                                                                                                                                                                                                                                                                                                                                                                                                                                                                                                                                                                                                                                                                                                                                                                                                                                                                                                                                                                                                              |

|            |                       |                        |                                                                                                                                                                                                                                                                                                                                                                                                                                                                                                                                                                                                                                                                                                                                                                                                                                                                                                                                                                                                                                                                                                                                                                                                                                                                                                                                                                                                                                                                                       |
|------------|-----------------------|------------------------|---------------------------------------------------------------------------------------------------------------------------------------------------------------------------------------------------------------------------------------------------------------------------------------------------------------------------------------------------------------------------------------------------------------------------------------------------------------------------------------------------------------------------------------------------------------------------------------------------------------------------------------------------------------------------------------------------------------------------------------------------------------------------------------------------------------------------------------------------------------------------------------------------------------------------------------------------------------------------------------------------------------------------------------------------------------------------------------------------------------------------------------------------------------------------------------------------------------------------------------------------------------------------------------------------------------------------------------------------------------------------------------------------------------------------------------------------------------------------------------|
|            |                       |                        | ,GABARAPL1,ALS2CL,SELENBP1,ANKRD9,MINK1,COTL1,SLC31A1,SLC22A5,ALDOC,QSOX1,SPPL2B,DDHD2,CALR,TSPO,FLT1,TMED9,MAGED2,PTPRJ,IGSF8,PTPRF,SELENO P,PDIA6,PRSS16,SYBU,YIF1B,HID1,MARCHF2,ITGB5,CORO7,DLG4,STK10,PDLIM4,COPB1,SYT5,TCIRG1,HLA-E,AHCYL1,TTYH3,HIP1,KIF1B,SPARC,CC2D1A,SLC17A7,THBS1,RRAS,TMEM9,CTSB,SH3TC2,TRIM3,DMXL2,SEC22B,COPG1,TKFC,PIIB,SERPINB1,LRG1,SPTAN1,DENND3,MAN2A1,ENO2,HEXD,TUBB4A,HAX1,SOCS1,CFH,TMEM30A,FAM234A,ITGB3,SNX16,MVB12A,NUCB1,PCSK4,DGKD, SORT1,SAT2,LITAF,AZU1,PTPRC,DAB2,DENND4B,IDH1, GGA1,EHBP1,PSAP,SLC4A11,RPS6KC1,AP3M2,OCEL1,HIP1R,ITPR2,ARRB1,MAN1B1,SMPDL3B,OSTF1,MMP14,MAN2B1,CHID1,GAS6,MYO5B,NTRK1,LPAR2,GNG7,LGALS3,TAB2,WARS1,CRYL1,IARS1,GDE1,PLXNB2,STX10,CEMIP2,CD55,YIPF5,CAPN5,ITM2B,LDLRAP1,NBR1,PCYOX1L,PDIA3,SCPEP1,DNM1,PDGFB,NIBAN2,PCOLCE,GSTO1,STK16,STX2,LAMB2,PI15,ERP44,VPS28,ATP1A2,TMED7,BMF,YIPF2,SIAE,CLCA1,CPNE3,ZFYVE28,C3,ANO5,PHGDH,RAB26,TMED4,RABAC1,MAN1A1,RTN4RL2,RPH3AL,COL1A2,KHK,HLA-B,WASL,STOM,FGFR4,MAPK8IP3,GIPC1,PKD1,GAL3ST4,SNX2,FMNL1,APAF1,GRN,EHD2,RAB24,SLC30A2,EPS8,RNF11,WDR91,ACAT1,WDR11,LGMN,SCFD1,MGAT5,SEC24A,PRCP,RTN4R,NIPA1,TUBB1,RAB31,TRAK2,UTRN,STON1,COL15A1,RPL27,CD93,TNFRSF1B,CR2,RAPGEF2,FUCA1,INPP4A,TNK2,EPS15,LHFPL2,VPS16,GPD1L,ENTR1,IRAK2,ADAM15                                                                                                                                                                                                                  |
| GO:0031410 | cytoplasmic vesicle   | 2.243832165765238e-24  | HSPA5,FN1,ARRDC4,FCGR2A,ANXA1,HSP90B1,KIF21B,PLD3,NFASC,REEP6,LAPTM4B,SCG3,LRP1,TGFB1,ANXA6,ATM,RAB6B,FLNB,CD36,DYSF,MCFD2,VEGFA,OPTN,ITGAV,CTSZ,GTPBP2,LMAN1,RYR1,SEC24D,HYOU1,CD46,F2R,SEPTIN6,RAB11FIP1,MYO1D,APOE,GOLGA2,FNBP1,ITGA5,PDIA4,TP53INP1,MFGE8,CALU,IL15RA,RHOBTB1,PA LM,BST2,GRAP2,RAB3B,RAB27A,IGF1,PYGL,ITGB1,CTSC,FGFR3,NTS,GAA,BRSK1,AP2M1,B2M,PROS1,SVIP,HDAC6,TMEM63A,ACE,ATP8B3,TBC1D5,CNN2,DMTN,AMOTL1,BAIAP3,ABCA7,KCNAB2,SLC44A2,SKIL,POMT1,PRKACA,GABBR1,PTPRS,WIPI1,SERPINI1,ATP7A,NDRG1,YPEL5,ULK1,CYSTM1,RAB18,TMPRSS4,GSN,BTK,GABARAPL1,ALS2CL,ANKRD9,COTL1,SLC31A1,ALDOC,QSOX1,SPPL2B,DDHD2,CALR,FLT1,TMED9,MAGED2,PTPRJ,SELENO P,PDIA6,PRSS16,SYBU,YIF1B,MARCHF2,ITGB5,CORO7,DLG4,STK10,PDLIM4,COPB1,SYT5,TCIRG1,HLA-E,HIP1,KIF1B,SPARC,SLC17A7,THBS1,TMEM9,CTSB,SH3TC2,TRIM3,DMXL2,SEC22B,COPG1,PIIB,SERPINB1,LRG1,SPTAN1,DENND3,HAX1,SOCS1,TMEM30A,ITGB3,SNX16,MVB12A,PCSK4,DGKD, SORT1,LITAF,AZU1,PTPRC,DAB2,DENND4B,IDH1, GGA1,EHBP1,PSAP,RPS6KC1,AP3M2,OCEL1,HIP1R,ITPR2,ARRB1,MAN1B1,OSTF1,MMP14,MAN2B1,CHID1,GAS6,MYO5B,NTRK1,LPAR2,LGALS3,TAB2,GDE1,CD55,YIPF5,ITM2B,LDLRAP1,NBR1,PCYOX1L,PDIA3,PDGFB,STK16,STX2,ERP44,VPS28,ATP1A2,TMED7,BMF,YIPF2,CLCA1,CPNE3,ZFYVE28,C3,RAB26,TMED4,RABAC1,MAN1A1,RPH3AL,HLA-B,WASL,STOM,FGFR4,MAPK8IP3,GIPC1,PKD1,SNX2,FMNL1,APAF1,GRN,EHD2,RAB24,SLC30A2,RNF11,WDR91,WDR11,LGMN,SCFD1,SEC24A,PRCP,NIPA1,RAB31,TRAK2,STON1,CD93,TNFRSF1B,RAPGEF2,FUCA1,INPP4A,TNK2,EPS15,LHFPL2,VPS16,ENTR1,IRAK2,ADAM15 |
| GO:0097708 | intracellular vesicle | 2.5181111169437426e-24 | HSPA5,FN1,ARRDC4,FCGR2A,ANXA1,HSP90B1,KIF21B,PLD3,NFASC,REEP6,LAPTM4B,SCG3,LRP1,TGFB1,ANXA6,ATM,RAB6B,FLNB,CD36,DYSF,MCFD2,VEGFA,OPTN,ITGAV,CTSZ,GTPBP2,LMAN1,RYR1,SEC24D,HYOU1,CD46,F2R,SEPTIN6,RAB11FIP1,MYO1D,APOE,GOLGA2,FNBP1,ITGA5,PDIA4,TP53INP1,MFGE8,CALU,IL15RA,RHOBTB1,PA                                                                                                                                                                                                                                                                                                                                                                                                                                                                                                                                                                                                                                                                                                                                                                                                                                                                                                                                                                                                                                                                                                                                                                                                  |

|            |          |                       |                                                                                                                                                                                                                                                                                                                                                                                                                                                                                                                                                                                                                                                                                                                                                                                                                                                                                                                                                                                                                                                                                                                                                                                                                                                                                                                                                                                                                                                                                                                                                                                                                                                                                                                                                                                                                                                                                                                                                      |
|------------|----------|-----------------------|------------------------------------------------------------------------------------------------------------------------------------------------------------------------------------------------------------------------------------------------------------------------------------------------------------------------------------------------------------------------------------------------------------------------------------------------------------------------------------------------------------------------------------------------------------------------------------------------------------------------------------------------------------------------------------------------------------------------------------------------------------------------------------------------------------------------------------------------------------------------------------------------------------------------------------------------------------------------------------------------------------------------------------------------------------------------------------------------------------------------------------------------------------------------------------------------------------------------------------------------------------------------------------------------------------------------------------------------------------------------------------------------------------------------------------------------------------------------------------------------------------------------------------------------------------------------------------------------------------------------------------------------------------------------------------------------------------------------------------------------------------------------------------------------------------------------------------------------------------------------------------------------------------------------------------------------------|
|            |          |                       | <p>LM,BST2,GRAP2,RAB3B,RAB27A,IGF1,PYGL,ITGB1,CTSC,FGFR3,NTS,GAA,BRSK1,AP2M1,B2M,PROS1,SVIP,HDA C6,TMEM63A,ACE,ATP8B3,TBC1D5,CNN2,DMTN,AMOTL1,BAIAP3,ABCA7,KCNAB2,SLC44A2,SKIL,POMT1,PRKACA,GABBR1,PTPRS,WIPI1,SERPINI1,ATP7A,NDRG1,YPEL5,ULK1,CYSTM1,RAB18,TMPRSS4,GSN,BTK,GABARAPL1,ALS2CL,ANKRD9,COTL1,SLC31A1,ALDOC,QSOX1,SPPL2B,D DHD2,CALR,FLT1,TMED9,MAGED2,PTPRJ,SELENOP,PDIA 6,PRSS16,SYBU,YIF1B,MARCHF2,ITGB5,CORO7,DLG4,STK10,PDLIM4,COPB1,SYT5,TCIRG1,HLA-E,HIP1,KIF1B,SPARC,SLC17A7,THBS1,TMEM9,CTSB,SH 3TC2,TRIM3,DMXL2,SEC22B,COPG1,PIIB,SERPINB1,LRG1,SPTAN1,DENND3,HAX1,SOCs1,TMEM30A,ITGB3,SNX1 6,MVB12A,PCSK4,DGKD,SORT1,LITAF,AZU1,PTPRC,DAB 2,DENND4B,IDH1,GGA1,EHBP1,PSAP,RPS6KC1,AP3M2,OC EL1,HIP1R,ITPR2,ARRB1,MAN1B1,OSTF1,MMP14,MAN2 B1,CHID1,GAS6,MYO5B,NTRK1,LPAR2,LGALS3,TAB2,GD E1,CD55,YIPF5,ITM2B,LDLRAP1,NBR1,PCYOX1L,PDIA3 ,PDGFB,STK16,STX2,ERP44,VPS28,ATP1A2,TMED7,BMF ,YIPF2,CLCA1,CPNE3,ZFYVE28,C3,RAB26,TMED4,RABA C1,MAN1A1,RPH3AL,HLA-B,WASL,STOM,FGFR4,MAPK8IP3,GIPC1,PKD1,SNX2,FMN L1,APAF1,GRN,EHD2,RAB24,SLC30A2,RNF11,WDR91,WD R11,LGMN,SCFD1,SEC24A,PRCP,NIPAL,RAB31,TRAK2,ST ON1,CD93,TNFRSF1B,RAPGEF2,FUCA1,INPP4A,TNK2,EP S15,LHFPL2,VPS16,ENTR1,IRAK2,ADAM15</p>                                                                                                                                                                                                                                                                                                                                                                                                                                                                                                                                                                                                                                                                                                                                 |
| GO:0016020 | membrane | 4.354142577657899e-24 | <p>HSPA5,FN1,LAMA3,ARRDC4,CISH,KSRI,FCGR2A,PTK2B,PIM1,ELAPOR2,AARS1,FLNC,ANXA1,RNF213,CA2,HSP90 B1,TSPAN13,CARD11,ANKRD29,CAPRIN2,PLD3,ST6GAL1,NFASC,AIG1,UNC5B,REEP6,LAMB1,CLSTN3,LAPTM4B,SCG3,IL10RA,TMEM273,LRP1,EEF1A2,RGS10,ANXA6,SLC 6A6,PLEKHH2,F11R,NIPSNAP1,RAB6B,FLNB,EPB41L2,ASS1,EML2,TGM2,HERPUD1,CD36,AIF1L,CRAT,PTGS1,TM CC2,DYSF,AKAP11,MARCKS,ANKZF1,MCFD2,VEGFA,FUT1 ,EFHD1,ERBB3,GALNT12,OPTN,PTK7,ITGAV,MRC2,TNFR SF9,CTSZ,ADD3,ATP2A3,SERPINH1,LMAN1,KIAA0040,T MOD1,SEMA6B,IL2RA,BLVRB,RYR1,ADAM19,SEC24D,REE P2,HYOU1,CD46,F2R,RIMS3,SEPTIN6,RAB11FIP1,SOCs 2,MLXIP,CMAS,CELSR2,MYO1D,APOE,P4HA1,GOLGA2,SL C29A4,HRC,DSTYK,ULBP1,FNBP1,ITGA5,LLGL2,TRDN,E NO3,MFGE8,CALU,IL15RA,CD24,RASGEF1A,RHOBTB1,TS PAN18,PALM,MMP15,BST2,B4GALNT4,GRAP2,ABCG2,ALA S1,LPCAT4,GPR155,KRT8,APOL6,RAB3B,GIPR,TMEM263 ,RAB27A,IGF1,HELZ2,ICAM5,ITGB1,MAGI1,PITPNM1,N LGN2,CTSC,FGFR3,SMIM3,VPS13D,PPP1R14C,WHRN,MIC AL1,NECTIN2,MUC4,GAA,PLEKHA4,CREB3L2,MBOAT2,PL OD2,TM6SF1,SMAD3,AP2M1,EDEM1,B2M,LYPLA1,MYRF,PROS1,SVIP,HDAC6,ARHGEF12,SDC3,ULBP2,SEMA7A,ATF 6,TMEM70,TMEM63A,GPC2,ROBO1,ACE,ATP8B3,UBAC1,T MEM241,TBC1D5,ACVR1C,PCLO,EXT2,ZNF397,AFDN,SDF 2L1,MFSD6,CNN2,DMTN,CYP26B1,PXK,AMOTL1,LARGE2,CDC42SE1,TRPM4,BAIAP3,ABCA7,BCAM,KCNAB2,PTPRH,SLC44A2,PTPRH,POMT1,GDPD5,PECR,BTN3A1,TMEM106C ,CPD,PLXND1,NDRG2,PRKACA,ADCY3,GABBR1,AGRN,HLT F,PTPRS,WIPI1,ATP7A,NDRG1,SEL1L3,SESTD1,SHC2,N UP107,PROCR,CYP2R1,TGFBR3,ULK1,SERINC2,PTEN,LRSAM1,CYSTM1,NPTXR,ITM2C,RAB18,TMPRSS4,GSN,PKHD 1,ALAS2,BTK,ADGRL1,CDCP1,SMIM14,GABARAPL1,XK,LRP4,SELENBP1,RGS16,KLF9,IFNGR1,RNF217,CMTM7,TD RKH,RNF103,SH3GLB2,NFE2L1,ETFDH,COTL1,SLC31A1,NDUFA10,SLC22A5,HACE1,QSOX1,CLYBL,SPPL2B,SLC25 A42,DDHD2,CALR,RHBDD1,AMFR,ITM2A,TSP0,FLT1,TME D9,GPR180,MAGED2,PTPRJ,IGSF8,PTPRF,SELENOP,PDIA 6,PRSS16,PLEKHA8,MORF4L2,SYBU,ARL6IP5,YIF1B,M ETTL25B,TJP3,AGPAT4,INPPL1,BCL3,HID1,OBSCN,POF UT2,SIDT2,CHST2,MARCHF2,LSM4,ITGB5,CORO7,DLG4,</p> |

|            |                    |                       |                                                                                                                                                                                                                                                                                                                                                                                                                                                                                                                                                                                                                                                                                                                                                                                                                                                                                                                                                                                                                                                                                                                                                                                                                                                                                                                                                                                                                                                                                                                                                                                                                                                                                                                                                                                                                                                                                                                                                                                                                                                                                                                                                                                          |
|------------|--------------------|-----------------------|------------------------------------------------------------------------------------------------------------------------------------------------------------------------------------------------------------------------------------------------------------------------------------------------------------------------------------------------------------------------------------------------------------------------------------------------------------------------------------------------------------------------------------------------------------------------------------------------------------------------------------------------------------------------------------------------------------------------------------------------------------------------------------------------------------------------------------------------------------------------------------------------------------------------------------------------------------------------------------------------------------------------------------------------------------------------------------------------------------------------------------------------------------------------------------------------------------------------------------------------------------------------------------------------------------------------------------------------------------------------------------------------------------------------------------------------------------------------------------------------------------------------------------------------------------------------------------------------------------------------------------------------------------------------------------------------------------------------------------------------------------------------------------------------------------------------------------------------------------------------------------------------------------------------------------------------------------------------------------------------------------------------------------------------------------------------------------------------------------------------------------------------------------------------------------------|
|            |                    |                       | <p>STK10,PCDH15,UCP2,SLC37A4,SLC22A23,SLC35F3,LDAF1,PDLIM4,ACBD4,IFITM1,CYP26A1,SLC25A29,P2RX6,WNK4,COPB1,CYLD,SYT5,TCIRG1,HLA-E,AHCYL1,RHAG,TTYH3,ADGRA2,SUSD6,HIP1,KIF1B,SPARC,CC2D1A,PLA2G6,SLC17A7,THBS1,CCND2,IL32,RRAS,TMEM9,CTSB,SH3TC2,DMXL2,SEC22B,COPG1,SUSD1,LMOD1,NDUFB4,PPIB,TCAF1,SERPINB1,LRG1,CLDN12,FAM171A2,PAAF1,GPC5,SPTAN1,XYLT2,EPHX1,FNDC4,MAN2A1,RTN3,ENO2,CASP10,SLC22A31,HAX1,PDIA5,SOCS1,TMEM30A,SELENON,FAM234A,ACVR1,ITGB3,SMIM1,CA11,SNX16,MVB12A,NUCB1,PCSK4,AGER,NIPSNAP2,DGKD,ACER3,SORT1,ACADVL,LITAF,AZU1,PTPRC,DAB2,TMCO6,GGA1,NBEAL1,IL6R,TMEM243,DIP2A,EHBP1,PSAP,SEMA6C,SLC4A11,ASAP2,PHKA1,CERCAM,PIK3CD,OAS3,EXOC2,GALNT5,RPS6KC1,GSDMB,REEP4,AP3M2,OCEL1,HIP1R,ITPR2,ARFGAP1,ARRB1,TNFRSF10B,TMEM50B,MAN1B1,FECH,TRIQK,SMPDL3B,COG6,LRR63,CD200R1,HJV,LT,K,MMP14,OGT,TRIB3,PLP1,CHID1,ZDHHC8,MYO5B,ADGR,L3,NTRK1,VCAN,CHPF,RXFP1,GPR158,LPAR2,GNNG7,LGLS3,TAB2,TMEM116,PHKB,LMNA,IARS1,GDE1,PLXNB2,ILL13RA1,FNDC3B,STX10,CEMIP2,VSTM4,CD55,YIPF5,RELL2,ITM2B,ABCB9,FDXR,LDLRAP1,NBR1,RGL3,IQGAP3,MRAP2,PCYOX1L,ARVCF,PDIA3,KIF5A,PAFAH2,GGT7,PIGS,AMIGO2,KCNJ11,DNM1,DLK1,ADGRE2,PDGFB,MAST2,NIBAN2,STK16,FAM234B,BBS4,STX2,SFXN5,ERP44,FRRS1,GPSM3,AKNA,VPS28,DIPK1A,OGA,SLC25A36,SLC6A8,ATP1A2,C6ORF89,TMED7,BMF,YIPF2,SMURF2,CLCA1,C3,PNE3,GAS2,ZFYVE28,FLT4,NEMP2,MCF2,BTN3A2,MTCL1,ANO5,TMEM143,RAB26,SLC4A7,PLPPR2,ACSL1,TSPAN3,HOOK1,TMED4,RABAC1,MAN1A1,RTN4RL2,SCN1B,PLCD3,NAT8L,RPH3AL,SNPH,MAST1,GUCA1B,KCTD20,ROBO3,STARD10,INPP5J,ARHGEF40,BNIP3,PIGK,HLA-B,ACSL6,GNB5,WASL,STOM,GOLM2,TCAF2,PEX2,SNTA1,FGFR4,MAPK8IP3,SEMA4G,GIPC1,RTKN2,ZP3,GPAT3,PKD1,C1GALT1,GAL3ST4,A4GALT,CUX1,MAPT,SNX2,TBC1D20,MC4R,FMNL1,SLC45A3,GRN,EHD2,WBP1L,CCDC88B,APBB3,RAB24,SLC30A2,TMEM41B,MDGA2,TENM1,EPS8,WDR91,WDR11,DNAJB11,ERO1B,ST3GAL5,RNF145,CBLB,BBC3,TP53I11,CACNA2D2,SCFD1,MGAT5,DLG3,MTND4L,C3ORF18,DTNA,RHBDD2,SEC24A,C2CD2L,PRCP,GTBPB1,RTN4R,SH3BGLR2,NIPA1,TMEM54,RAB31,TRAK2,PVR,UTRN,STON1,TLCD2,RPL27,FADS3,CD93,B4GALT4,GALNT10,RTN2,SLC16A5,TNFRSF1B,CR2,SYDE2,UFL1,RB1CC1,ACAD11,TTC7A,RAPGEF2,INPP4A,ANO8,TNK2,GPSM1,ACSBG2,PPP1R16B,EPS15,MYORG,ATP1B2,LHFPL2,GT3C3,MAP4K2,VPS16,GPD1L,THBD,ENTR1,IRAK2,HEPH,ADAM15</p> |
| GO:0031090 | organelle membrane | 1.040554824358374e-18 | <p>HSPA5,KSR1,FCGR2A,ANXA1,HSP90B1,PLD3,ST6GAL1,NFASC,REEP6,CLSTN3,LAPTM4B,SCG3,LRP1,EEF1A2,ANXA6,RAB6B,ASS1,HERPUD1,CD36,CBAT,PTGS1,TMCC2,DYSF,MCFD2,FUT1,EFHD1,GALNT12,OPTN,ITGAV,CTS2,ATP2A3,LMAN1,RYR1,SEC24D,REEP2,CD46,RAB11FIP1,MLXIP,APOE,GOLGA2,HRC,TRDN,MFGE8,CALU,IL15RA,RHOBTB1,BST2,B4GALNT4,ABCG2,ALAS1,LPCAT4,RAB27A,ITGB1,PITPNM1,CTSC,GAA,CREB3L2,MBOAT2,PLOD2,TM6SF1,SMAD3,AP2M1,EDEM1,B2M,LYPLA1,MYRF,PROS1,SVIP,ATF6,TMEM70,TMEM63A,ROBO1,ATP8B3,TBC1D5,EXT2,DMTN,CYP26B1,LARGE2,BAIAP3,ABCA7,KCNAB2,SLC4A2,POMT1,PECR,TMEM106C,ADCY3,GABBR1,PTPRS,WIP1,ATP7A,NDRG1,NUP107,CYP2R1,ULK1,CYSTM1,ITM2C,RAB18,ALAS2,SMIM14,GABARAPL1,XK,RNF103,NFE2L1,ETFDH,NDUFA10,HACE1,QSOX1,SPPL2B,SLC25A42,CALR,RHBDD1,AMFR,TSPO,TMED9,PTPRJ,PDIA6,PLEKHA8,SYBU,ARL6IP5,YIF1B,AGPAT4,HID1,POFUT2,SIDT2,CHST2,MARCHF2,CORO7,DLG4,STK10,UCP2,SLC37A4,LDAF1,PDLIM4,IFITM1,CYP26A1,SLC25A29,COPB1,SYT5,TCI</p>                                                                                                                                                                                                                                                                                                                                                                                                                                                                                                                                                                                                                                                                                                                                                                                                                                                                                                                                                                                                                                                                                                                                                                                                                                                                          |

|            |                                                  |                           |                                                                                                                                                                                                                                                                                                                                                                                                                                                                                                                                                                                                                                                                                                                                                                                                                                                                                                                                                                                                                                                                                                                                                                                                                                              |
|------------|--------------------------------------------------|---------------------------|----------------------------------------------------------------------------------------------------------------------------------------------------------------------------------------------------------------------------------------------------------------------------------------------------------------------------------------------------------------------------------------------------------------------------------------------------------------------------------------------------------------------------------------------------------------------------------------------------------------------------------------------------------------------------------------------------------------------------------------------------------------------------------------------------------------------------------------------------------------------------------------------------------------------------------------------------------------------------------------------------------------------------------------------------------------------------------------------------------------------------------------------------------------------------------------------------------------------------------------------|
|            |                                                  |                           | <p>RG1,HLA-E,AHCYL1,HIP1,KIF1B,SPARC,SLC17A7,CCND2,TMEM9,DMXL2,SEC22B,COPG1,NDUFB4,XYLT2,EPHX1,MAN2A1,RTN3,HAX1,PDIA5,TMEM30A,SELENON,ITGB3,SNX16,MVB12A,PCSK4,NIPSNAP2,ACER3,SORT1,ACADVL,LITAF,AZU1,PTPRC,DAB2,GGA1,PSAP,SLC4A11,ASAP2,GALNT5,REEP4,AP3M2,HIP1R,ITPR2,ARFGAP1,ARRB1,TMEM50B,MAN1B1,FECH,TRIQK,COG6,OGT,ZDHHC8,MYO5B,NTRK1,CHPF,LGALS3,TAB2,LMNA,GDE1,STX10,CD55,YIPF5,ITM2B,ABCB9,FDXR,LDLRAP1,NBR1,MRAP2,PDIA3,PAFAH2,PIGS,PDGFB,BBS4,SFXN5,ERP44,VPS28,DIPK1A,SLC25A36,ATP1A2,C6ORF89,TMED7,BMF,YIPF2,CLCA1,CPNE3,ZFYVE28,NEMP2,ANO5,RAB26,ACSL1,TMED4,MAN1A1,NAT8L,RPH3AL,GUCA1B,BNIP3,PIGK,HLA-B,ACSL6,WASL,STOM,PEX2,MAPK8IP3,GIPC1,GPAT3,PKD1,C1GALT1,GAL3ST4,A4GALT,CUX1,SNX2,TBC1D20,GRN,EHD2,RAB24,SLC30A2,TMEM41B,WDR91,WDR11,ERO1B,ST3GAL5,RNF145,BBC3,SCFD1,MGAT5,MTND4L,RHBDD2,SEC24A,C2CD2L,PRCP,SH3BGRL2,RAB31,RPL27,FADS3,CD93,B4GALT4,GALNT10,RTN2,TNFRSF1B,UFL1,RB1CC1,ACAD11,INPP4A,TNK2,GPSM1,EPS15,MYORG,LHFPL2,GTFC3,MAP4K2,VPS16,THBD,IRAK2</p>                                                                                                                                                                                                                                                     |
| GO:0098588 | boundin<br>g<br>membran<br>e of<br>organel<br>le | 1.0958060239<br>26822e-17 | <p>FCGR2A,ANXA1,PLD3,ST6GAL1,NFASC,REEP6,CLSTN3,LAPT4B,SCG3,LRP1,EEF1A2,ANXA6,RAB6B,ASS1,CD36,MCFD2,FUT1,GALNT12,OPTN,ITGAV,CTSZ,ATP2A3,LMAN1,RYR1,SEC24D,CD46,RAB11FIP1,MLXIP,APOE,GOLGA2,HRC,TRDN,MFGE8,IL15RA,RHOBTB1,BST2,RAB27A,ITGB1,CTSC,GAA,PLOD2,TM6SF1,AP2M1,B2M,PROS1,SVIP,ATF6,TMEM63A,ROBO1,ATP8B3,TBC1D5,EXT2,DMTN,LARGE2,BAIAP3,ABCA7,KCNAB2,SLC44A2,PECR,ADCY3,PTPRS,WIPI1,ATP7A,NDRG1,ULK1,CYSTM1,ITM2C,RAB18,GABARAPL1,HACE1,QSOX1,SPPL2B,CALR,TSPO,TMED9,PTPRJ,PLEKHA8,SYBU,YIF1B,AGPAT4,HID1,SIDT2,CHST2,MARCHF2,CORO7,DLG4,STK10,PDLIM4,IFITM1,COPB1,SYT5,TCIRG1,HLA-E,HIP1,SPARC,SLC17A7,TMEM9,DMXL2,SEC22B,COPG1,XYLT2,MAN2A1,RTN3,HAX1,TMEM30A,ITGB3,SNX16,MVB12A,PCSK4,NIPSNAP2,ACER3,SORT1,LITAF,AZU1,PTPRC,DAB2,GGA1,PSAP,GALNT5,HIP1R,ITPR2,ARFGAP1,ARRB1,TMEM50B,COG6,ZDHHC8,NTRK1,CHPF,LGALS3,TAB2,STX10,CD55,ITM2B,ABCB9,LDLRAP1,NBR1,PDIA3,PDGFB,BBS4,VPS28,C6ORF89,TMED7,BMF,YIPF2,CLCA1,CPNE3,ZFYVE28,RAB26,ACSL1,MAN1A1,RPH3AL,BNIP3,HLA-B,ACSL6,WASL,STOM,PEX2,MAPK8IP3,PKD1,C1GALT1,A4GALT,CUX1,SNX2,TBC1D20,GRN,EHD2,RAB24,SLC30A2,WDR91,WDR11,ST3GAL5,BBC3,SCFD1,MGAT5,RHBDD2,SEC24A,PRCP,RAB31,RPL27,CD93,B4GALT4,GALNT10,RTN2,TNFRSF1B,RB1CC1,INPP4A,GPSM1,EPS15,LHFPL2,MAP4K2,VPS16,THBD,IRAK2</p> |
| GO:1903561 | extracel<br>lular<br>vesicle                     | 5.6129326592<br>94167e-16 | <p>HSPA5,FN1,LAMA3,ARRDC4,GDF15,AARS1,ANXA1,CA2,HSP90B1,CARD11,PLD3,GFPT1,LAMB1,EPHX2,ANXA6,F11R,FLNB,EPB41L2,ASS1,TGM2,AIF1L,PTGS1,DYSF1,MARCKS,GMPPA,ITGAV,CTSZ,CALB1,ERMN,LMAN1,BTG2,BLVRB,RYR1,HYOU1,CD46,MYO1D,LGALS1,APOE,LAMA5,ENO3,MFGE8,BST2,GPR155,KRT8,IDH2,RAB3B,RAB27A,PYGL,ITGB1,CTSC,VPS13D,NECTIN2,MUC4,GAA,PLOD2,AP2M1,B2M,PSME1,LYPLA1,PROS1,SVIP,ARHGEF12,TMEM63A,RBL2,ACE,UBAC1,PCLO,EXT2,BCAM,SLC44A2,CPD,NDRG2,PRKACA,AGRN,PTPRS,SERPINI1,NDRG1,PROCR,DNAE2,TGFBR3,SERINC2,CYSTM1,ITM2C,GSN,PKHD1,COL18A1,SELENBP1,MINK1,COTL1,SLC22A5,ALDOC,QSOX1,CALLR,TSPO,TMED9,PTPRJ,IGSF8,PTPRF,SELENOP,PDIA6,HID1,ITGB5,STK10,HLA-E,AHCYL1,TTYH3,CC2D1A,THBS1,RRAS,CTSB,TKFC,PPIB,SERPINB1,LRG1,SPTAN1,MAN2A1,ENO2,HEXD,TUBB4A</p>                                                                                                                                                                                                                                                                                                                                                                                                                                                                                              |

|            |                                          |                       |                                                                                                                                                                                                                                                                                                                                                                                                                                                                                                                                                                                                                                                                                                                                                                                                                                                                                                                                                                                                                                                                                                                                                                                              |
|------------|------------------------------------------|-----------------------|----------------------------------------------------------------------------------------------------------------------------------------------------------------------------------------------------------------------------------------------------------------------------------------------------------------------------------------------------------------------------------------------------------------------------------------------------------------------------------------------------------------------------------------------------------------------------------------------------------------------------------------------------------------------------------------------------------------------------------------------------------------------------------------------------------------------------------------------------------------------------------------------------------------------------------------------------------------------------------------------------------------------------------------------------------------------------------------------------------------------------------------------------------------------------------------------|
|            |                                          |                       | ,CFH,FAM234A,ITGB3,MVB12A,NUCB1,SAT2,AZU1,PTPR C,IDH1,PSAP,MAN1B1,SMPDL3B,MAN2B1,CHID1,GAS6,M YO5B,GNG7,LGALS3,WARS1,CRYL1,IARS1,PLXNB2,CEMI P2,CD55,CAPN5,ITM2B,PDIA3,SCPEP1,DNM1,NIBAN2,P COLCE,GSTO1,LAMB2,PI15,ERP44,VPS28,ATP1A2,SIAE ,CPNE3,C3,PHGDH,MAN1A1,RTN4RL2,COL1A2,KHK,HLA- B,WASL,STOM,GIPC1,PKD1,GAL3ST4,FMNL1,APAF1,GRN ,EHD2,EPS8,RNF11,ACAT1,LGMN,MGAT5,PRCP,RTN4R,T UBB1,UTRN,COL15A1,RPL27,CR2,FUCA1,GPD1L,ADAM15                                                                                                                                                                                                                                                                                                                                                                                                                                                                                                                                                                                                                                                                                                                                                       |
| GO:0065010 | extracellular membrane-bounded organelle | 5.901196968151801e-16 | HSPA5,FN1,LAMA3,ARRDC4,GDF15,AARS1,ANXA1,CA2,H SP90B1,CARD11,PLD3,GFPT1,LAMB1,EPHX2,ANXA6,F11 R,FLNB,EPB41L2,ASS1,TGM2,AIF1L,PTGS1,DYSF,MARC KS,GMPPA,ITGAV,CTSZ,CALB1,ERMN,LMAN1,BTG2,BLVR B,RYR1,HYOU1,CD46,MYO1D,LGALS1,APOE,LAMA5,ENO3 ,MFGE8,BST2,GPR155,KRT8,IDH2,RAB3B,RAB27A,PYGL ,ITGB1,CTSC,VPS13D,NECTIN2,MUC4,GAA,PLOD2,AP2M 1,B2M,PSME1,LYPLA1,PROS1,SVIP,ARHGEF12,TMEM63A ,RBL2,ACE,UBAC1,PCLO,EXT2,BCAM,SLC44A2,CPD,NDR G2,PRKACA,AGRN,PTPRS,SERPINI1,NDRG1,PROC,DNAS E2,TGFBR3,SERINC2,CYSTM1,ITM2C,GSN,PKHD1,COL18 A1,SELENBP1,MINK1,COTL1,SLC22A5,ALDOC,QSOX1,CA LR,TSP0,TMED9,PTPRJ,IGSF8,PTPRF,SELENOP,PDIA6 ,HID1,ITGB5,STK10,HLA- E,AHCYL1,TTYH3,CC2D1A,THBS1,RRAS,CTSB,TKFC,PPI B,SERPINB1,LRG1,SPTAN1,MAN2A1,ENO2,HEXD,TUBB4A ,CFH,FAM234A,ITGB3,MVB12A,NUCB1,SAT2,AZU1,PTPR C,IDH1,PSAP,MAN1B1,SMPDL3B,MAN2B1,CHID1,GAS6,M YO5B,GNG7,LGALS3,WARS1,CRYL1,IARS1,PLXNB2,CEMI P2,CD55,CAPN5,ITM2B,PDIA3,SCPEP1,DNM1,NIBAN2,P COLCE,GSTO1,LAMB2,PI15,ERP44,VPS28,ATP1A2,SIAE ,CPNE3,C3,PHGDH,MAN1A1,RTN4RL2,COL1A2,KHK,HLA- B,WASL,STOM,GIPC1,PKD1,GAL3ST4,FMNL1,APAF1,GRN ,EHD2,EPS8,RNF11,ACAT1,LGMN,MGAT5,PRCP,RTN4R,T UBB1,UTRN,COL15A1,RPL27,CR2,FUCA1,GPD1L,ADAM15 |

**Table S14.** Venn diagram showing the intersections of upregulated genes with lists of genes that reveal an increase or decrease in rDNA contacts. Related to Figure 3B.

| Names                              | total | elements                                                                                                                                                                                                                                                                                                                                                                                                                                                                                                                                                                              |
|------------------------------------|-------|---------------------------------------------------------------------------------------------------------------------------------------------------------------------------------------------------------------------------------------------------------------------------------------------------------------------------------------------------------------------------------------------------------------------------------------------------------------------------------------------------------------------------------------------------------------------------------------|
| 4C-increased-1309 upregulated-1285 | 74    | THRAP3 FOXK2 TAF2 USP14 LIMD1 DDO1 WDR12 PHACTR1 OPA3 UIMC1 GUSBP1 TLK1 CREBBP FAM193A MIR17HG SUPT16H NIPA2 LRRFIP1 CTDPI1 HECTD1 BIRC6 PHACTR2 DNAJC21 INTS13 DDX10 CLSPN PPP6R3 GUCD1 PPIP5K2 EBNA1BP2 SNX8 NSMAF GSE1 ABLIM1 UCK2 RPTOR STT3A ECHDC1 ACACA MAN2A2 CDK12 AFG3L2 CCDC138 MTOR LARP1 PSMB2 ANKRD11 SPEN NAP1L4 KANSL1 CRIM1 MTREX GID8 LINC00861 CUL1 NSUN2 LINC01128 GRB10 MLLT1 SDCBP MBNL1 ABI1 MED1 HNRNPM MACROH2A1 JPT2 MSH2 BAZ1A EWSR1 ELL2 PRAME NUP43 EOGT ANP32B                                                                                          |
| 4C-decreased-1200 upregulated-1285 | 78    | IGF2BP3 MRPL45 HERC2 ARMC6 ASH1L GOT2 BRD4 CHAF1A CHAMP1 NSD1 AGO2 KIAA0753 ANKRD17 IBA57 SREBF2 RESF1 MAPK1IP1L ZC3H14 ZNF33B BRCA2 SSBP3 LCLAT1 MS4A4A SMARCA4 CWC22 ZNF121 DHX29 TM9SF3 CFAP97 ANKRD33B UBAP2 APC GEMIN5 KTN1 HMGB1 MEF2C SETD2 MRPS35 UTP4 SMARCC1 NUP214 ECPAS SFPQ URB1 STAG2 PAFAH1B1 CSDE1 ZBTB2 EFTUD2 NRIP1 STON2 DNAJC7 ZC3HAV1 CPSF3 SNRPD1 SUMO3 BZW1 PCNA AQR RNF138 ZCCHC14 ADSS2 LINC00923 MGA NIN PPIL2 SPTB UBAP2L ZFYVE26 BACH1 OXNAD1 ZNF431 TBCD KCNK5 SERBP1 RANBP2 PEPD PCNT                                                                   |
| 4C-increased-1309                  | 1233  | FSTL1 CD44 PLCE1 SLMAP FAM219A FARP1 KCNMA1 PKNOX2 ARHGAP5-AS1 APBB2 ZNF684 KLHL13 GLT1D1 ABCB7 COX7A2L FYB2 RNF38 AHDC1 LINC02073 CUBN SLC10A7 LDB3 PAK1 SCAF8 SLC6A11 B9D1 CPXM2 RTN1 KIRREL1 LINC01467 BEBP4 PPP1R13B FGR TOP3A EPN2 LINC01491 LINC02664 INIP NSMCE2 TTC3 ZNF208 RCL1 PRSS51 SLC25A52 OAZ2 TEAD1 ZNF718 DKK2 GLRA4 OR7A17 DHRS11 PCAT19 CCDC34 TAOK3 DNAJC27-AS1 PUM3 ZNF66 LINC02563 SCYGR8 LRGUK TENM4 TRPM6 FAAHP1 LINC01479 CCDC106 SLC8A1 SMIM35 ANLN ARHGEF26-AS1 SLC1A7 LGI2 ANKRD6 KCNC1 ADGRE3 GPR55 DNAJC15 STAU2 PGAP4 SIAH3 RIPK4 TMEM63C ZNF257 TIAL1 |

|  |                                                                                                                                                                                                                                                                                                                                                                                                                                                                                                                                                                                                                                                                                                                                                                                                                                                                                                                                                                                                                                                                                                                                                                                                                                                                                                                                                                                                                                                                                                                                                                                                                                                                                                                                                                                                                                                                                                                                                                                                                                                                                                                                                                                                                                                                                                                                                                                                                                                                                                                                                                                                                                                                                                                                                                                                                                                                                                                                                                                                                                                                                                                                                                                                                                                                                                                                                                                                                                                                                                                                                                                                                                                                                                                                                                                                                                                                                                                                                                                                                                                                                                                                                                                                                                                                                                                                                                                                                                                                                                                                                                                                                                                                                                                                                                                                                                                                                                                                                                                                       |
|--|-------------------------------------------------------------------------------------------------------------------------------------------------------------------------------------------------------------------------------------------------------------------------------------------------------------------------------------------------------------------------------------------------------------------------------------------------------------------------------------------------------------------------------------------------------------------------------------------------------------------------------------------------------------------------------------------------------------------------------------------------------------------------------------------------------------------------------------------------------------------------------------------------------------------------------------------------------------------------------------------------------------------------------------------------------------------------------------------------------------------------------------------------------------------------------------------------------------------------------------------------------------------------------------------------------------------------------------------------------------------------------------------------------------------------------------------------------------------------------------------------------------------------------------------------------------------------------------------------------------------------------------------------------------------------------------------------------------------------------------------------------------------------------------------------------------------------------------------------------------------------------------------------------------------------------------------------------------------------------------------------------------------------------------------------------------------------------------------------------------------------------------------------------------------------------------------------------------------------------------------------------------------------------------------------------------------------------------------------------------------------------------------------------------------------------------------------------------------------------------------------------------------------------------------------------------------------------------------------------------------------------------------------------------------------------------------------------------------------------------------------------------------------------------------------------------------------------------------------------------------------------------------------------------------------------------------------------------------------------------------------------------------------------------------------------------------------------------------------------------------------------------------------------------------------------------------------------------------------------------------------------------------------------------------------------------------------------------------------------------------------------------------------------------------------------------------------------------------------------------------------------------------------------------------------------------------------------------------------------------------------------------------------------------------------------------------------------------------------------------------------------------------------------------------------------------------------------------------------------------------------------------------------------------------------------------------------------------------------------------------------------------------------------------------------------------------------------------------------------------------------------------------------------------------------------------------------------------------------------------------------------------------------------------------------------------------------------------------------------------------------------------------------------------------------------------------------------------------------------------------------------------------------------------------------------------------------------------------------------------------------------------------------------------------------------------------------------------------------------------------------------------------------------------------------------------------------------------------------------------------------------------------------------------------------------------------------------------------------------------------------------|
|  | <p> ST8SIA4 HYDIN2 ADGRE4P IGLV3-2 USP7 CD82 KIR2DL4 FAM167B ARL13B SCP2<br/> TMEM156 ABHD2 ALCAM DENND1A SEC14L1 ERLIN2 ATP11C PDZRN3 SF3B6 ADAM32<br/> RSRC1 DNAH11 ASS1 ZSCAN5C NIPBL CEP120 B3GALT5 CDC42EP3 MICU1 FAM204A<br/> SNX25 MYO5C SDC2 OTX2-AS1 ATF1 SLC25A21 SLC22A14 SAMD12-AS1 RBPJP6 IL6R<br/> C12orf4 TTLL11 LINC01579 NEBL RARB CCDC18 CDH8 AGPS TRPV5 HEPHL1 PJA2<br/> KLHL7 TCF4 ECM1P1 GACAT3 RPRD1B AURKA LINC01145 PTPN2 AP3B1 PBLD GORAB<br/> ERICH5 BCAP29 TTC21B PSMF1 SLC5A4-AS1 SH3PXD2A NEK6 SLC39A12 MOB1B<br/> OR13C9 ASAP2 SEMA3F-AS1 YIPF6 TMEM25 OSBPL10 RIC3 CASP5 EXOC1 RNF182<br/> RALGPS1 UPP2 PHF21B ZFPM2 PIEZO2 FAM66A BCRP2 SVEP1 FANCA DEUP1 ZNF354C<br/> LINC02325 LRRC2 ANKRD26 RGS20 MIR3118-2 PDGFD CNDP2 HCRT1 RELL1<br/> LINC02176 BRINP3 LINC01237 KIF4A XRCC4 OVCH2 COP1P1 EPHA7 MAP7 TM9SF4<br/> SENP8 SUSD6 NSG2 ZBTB80S GRIA1 ZNF627 IFNAR1 KIAA0319L USH2A LHFPL6 OPN3<br/> NEGR1 NAV2 XXYLTI CACNG2 ANO10 BTBD9 SPATA48 CA5A FAM72D USP18 NET1<br/> TTC28-AS1 BMP2 TOX KIAA0232 LINC02011 SRGAP2C TMOD2 SLC44A5 FAM107B LUZP2<br/> BTBD10 SH2D3C MELK RBPJP2 LRIG1 YPEL1 PRKACB ZNF536 RIMS1 GXYLT2 HIPK3<br/> EPB41L3 WSB1 TMEM225 POR LINC00896 PARVB MORC1 OR10H2 ZBTB7C SCGB1D5P<br/> KANK4 GAST SGO1 WDR26 SARIA SLC37A1 BCL11B LINC01814 DTWD2 LINC01213<br/> NELL2 TSPAN2 MAG11 SLC14A2 LINC02668 OR52B3P ASAH2B RALB MOSMO KRTAP19-<br/> 10P BLK PPP1R17 PIAS1 PTCSC3 LINC02180 SSBP2 ZNF705CP GALNT10 FHIP2A CFAP74<br/> ZNF846 HAGLR ZNF287 ARMC2 FER1L6 ALS2 CYTH4 COMMD8 ZNF608 PTGER4P2<br/> TBATA ATL1 SERPINB11 ZDHHHC17 KCNH1 ABCC9 SNAP29 QSOX2 GSG1L MCF2L<br/> LINC01098 ACSS3 BBOX1-AS1 ABCD3 DCDC1 NPAS2 DIAPH3 CCSER2 INTS7 AMPH ASB4<br/> TMEM178B COL5A3 COL4A2 PARP15 ME2 GRAMD1B SIAH2 POLR3A ZNF44 LINC00536<br/> HEATR5A ADA2 PRKCZ BPNT1 F13A1 ALG10B CDC14B GIPC2 RNU6-1007P KDM7A<br/> CYP4F22 ABCA10 LINC01182 KLHL1 SP110 LINC01566 PRSS2 MRM1 ZNF705D ATP9A<br/> POSTN OLFM4 SAMHD1 OCLN AK8 SDF4 ITGBL1 TNFSF11 SPOP EFHD2 EGFR MYEOV<br/> ADAM28 MRPL13 B4GALNT3 AFAP1 DPY19L2P1 SH3BP5 SLC49A4 FANCM NEO1 MELTF<br/> MXRA7 MYT1L SRGAP2B SLC37A2 ATP1A1-AS1 SORCS3 PDP2 VPS37A LRRC49 ERP27<br/> ZNRF3 ZBTB21 BBS4 TENM3 ITPKB ENPEP TUSC3 IPCEF1 RTRAF NF1P9 OR4K6P BIN2<br/> LINC00877 TCERG1 UBE2O VENTX DIRC3 PLCZ1 CPEB4 COL6A5 ZFYVE28 NCOR1<br/> LINC02213 PRDM10 EBF2 C16orf72 USP33 ERBIN RNY4 SLC24A4 ZNF573 MBTPS2<br/> KHDC4 C2 NTF3 OR6C75 ZNF705G LINC01684 PI4K2B USP41 RBMX2 FAM72A IL17RA<br/> SOX1-OT SUSD4 PTH GALNT14 RAB22A H2ACP1 FAM66C ZNF160 LINC00466 HADHB<br/> NSMCE1 DNAH10 GAS2 PDE10A CACNB2 REPS1 MAP3K4 TP53I11 PDXDC1 MTPN<br/> MT1HL1 LINC02646 GNG7 VSTM2A RUNX2 ZNF804B LRP12 LRRC8B CSNK1G1 ZNF169<br/> MICU2 SOX6 JAZF1-AS1 SGCD RC3H2 LINC01492 RNU6-374P TNNI1 RAC1P3 SP3 STK32B<br/> PLG ZNF106 LINC01020 NR2C1 SLFN11 ADAMTS3 ERO1B DNAH8 NHS LINC02505 CABYR<br/> LINC01476 ANK3-DT RGS12 RAPGEF2 ZNF438 GTF21 NCK1 SOHLH1 LINC01192 CDV3P1<br/> C15orf32 PUDP KDM1B SSPN HS3ST2 F5 PATJ FAT1 NUP50-DT CPS1 MESD PRKCH<br/> TRAK1 TET1 FAM66B RHPN2 ANKRD30A RABGAP1L KRT25 NMU DENND2B LINC00603<br/> HADHA CFDP1 LINC00944 SMARCA1 MIR3118-3 FNDC3B ADAMTS9-AS2 ASTN1<br/> GNG12-AS1 GFRA1 NSG1 RMST ANKRD20A8P MAPKBP1 CPE TDRD7 RNF8 LY86-AS1<br/> LINC02613 PYGO1 LINC01723 NFKBIA TEX29 DNAL1 TRAPPC3 CD101 PFKFB4<br/> TMEM132D HMCN2 FHIP1A EFCAB8 LINC01204 SPRED2 SCN10A HSDL2 MYLK3 NCOA7<br/> ANKRD18A ZNF350-AS1 CEP128 ZC3H15 LINC01135 ANKRD7 ABCA5 PTCSC2 CIB4<br/> ABCC8 TTLL5 AKAP11 NOXRED1 TMTC1 TTC33 MOCS2 NRK NAT1 KICS2 CYBRD1<br/> MCPH1 MINARI EIPR1 STON1-GTF2A1L BMP2K LINC02543 CYFIP2 APOOP5 CCDC126<br/> BABAM2 MSANTD4 CRB1 IL1R1 OTOG HEPACAM USP8 NUDT21 XPO7 ARSJ KCNS3<br/> ENPP3 ZNF235 ERC1 LINC02006 VWA3B ZNF850 ALPL PDLIM5 MAP3K9 XYLT1 BTAFI<br/> PDCD6IPP2 ALPK2 LINC02660 ABCA13 HNRNCP9 RFX2 MAPK8IP1 ADGRB1 SLC66A1L<br/> LYPLAL1-DT ADGRE1 RAP1GDS1 FOXO1B TET1P1 ST8SIA5 TBC1D19 ZNRF2P2 PDE6A<br/> CHST8 BID COX5A MACF1 MDFIC MNAT1 PCMTD2 MBNL2 DNAH14 STARD4-AS1 ERI1<br/> TC2N TUBGCP3 BTLA LGALS9DP SLC15A5 HCP5 AMBRA1 CLEC20A NETO2 DOCK2<br/> SERPINA6 ASCL3 PTPRE IFT46 FAM66D NUP210L LINC02063 TSPAN3 ALPK3 LINC02465<br/> FLVCR1 SLC9A5 MUSK EPDR1 MYO3B LMNTD1 RAB8B LINC00583 MYOM1 ZSCAN30<br/> MTCO2P3 LINC00469 RNU6-835P RXRA CGAS ARHGEF7 SLC23A2 LIN54 LINC01649<br/> ARPP21 ARL11 MAML2 SPAG16 ADAM5 TRIM43B ZNF879 ARHGEF12 LYPLA1 LNPEP<br/> DDX39BP1 LINC02198 UNC93B3 RPS3AP6 POU1F1 ZNF397 KIAA1958 CARD18<br/> LINC00623 NEDD4 RFTN1 CCDC141 NEK4 RSU1P1 PEX14 CFAP61 FYCO1 LPGAT1<br/> CNTN4 FOLH1 HRH4 SPRR2D LRRC38 EXOC6B EVC2 CNKSR3 USP49 DRAXIN SEMA3E<br/> CSF1 CEACAM22P LINC02109 LINC00511 SLC8A3 TRNAU1AP LINC02145 RNF17 HAS2-<br/> AS1 KIF11 LINC02400 SLC2A3 FAM72B PRAMEF26 SLC40A1 PHC3 STOML1 CADM2<br/> SDR42E1 LINC01581 FANCL SH3GLB1 GABRR2 RAP1GAP PIK3C3 OTULINL RAD9A<br/> SLC9C1 SCML2 SPOPL MAG13 LINC00701 TRAF3 MPPED1 CCDC122 CHD6 FAM135B </p> |
|--|-------------------------------------------------------------------------------------------------------------------------------------------------------------------------------------------------------------------------------------------------------------------------------------------------------------------------------------------------------------------------------------------------------------------------------------------------------------------------------------------------------------------------------------------------------------------------------------------------------------------------------------------------------------------------------------------------------------------------------------------------------------------------------------------------------------------------------------------------------------------------------------------------------------------------------------------------------------------------------------------------------------------------------------------------------------------------------------------------------------------------------------------------------------------------------------------------------------------------------------------------------------------------------------------------------------------------------------------------------------------------------------------------------------------------------------------------------------------------------------------------------------------------------------------------------------------------------------------------------------------------------------------------------------------------------------------------------------------------------------------------------------------------------------------------------------------------------------------------------------------------------------------------------------------------------------------------------------------------------------------------------------------------------------------------------------------------------------------------------------------------------------------------------------------------------------------------------------------------------------------------------------------------------------------------------------------------------------------------------------------------------------------------------------------------------------------------------------------------------------------------------------------------------------------------------------------------------------------------------------------------------------------------------------------------------------------------------------------------------------------------------------------------------------------------------------------------------------------------------------------------------------------------------------------------------------------------------------------------------------------------------------------------------------------------------------------------------------------------------------------------------------------------------------------------------------------------------------------------------------------------------------------------------------------------------------------------------------------------------------------------------------------------------------------------------------------------------------------------------------------------------------------------------------------------------------------------------------------------------------------------------------------------------------------------------------------------------------------------------------------------------------------------------------------------------------------------------------------------------------------------------------------------------------------------------------------------------------------------------------------------------------------------------------------------------------------------------------------------------------------------------------------------------------------------------------------------------------------------------------------------------------------------------------------------------------------------------------------------------------------------------------------------------------------------------------------------------------------------------------------------------------------------------------------------------------------------------------------------------------------------------------------------------------------------------------------------------------------------------------------------------------------------------------------------------------------------------------------------------------------------------------------------------------------------------------------------------------------------------------------------------|

|                   |      |                                                                                                                                                                                                                                                                                                                                                                                                                                                                                                                                                                                                                                                                                                                                                                                                                                                                                                                                                                                                                                                                                                                                                                                                                                                                                                                                                                                                                                                                                                                                                                                                                                                                                                                                                                                                                                                                                                                                                                                                                                                                                                                                                                                                                                                                                                                                                                                                                                                                                                                                                                                                                                                                                                                                                                                                                                                                                                                                                                                                                                                                                                                                                                                                                                                                                                                                                                                                                                                                                                                                                                                                                                                              |
|-------------------|------|--------------------------------------------------------------------------------------------------------------------------------------------------------------------------------------------------------------------------------------------------------------------------------------------------------------------------------------------------------------------------------------------------------------------------------------------------------------------------------------------------------------------------------------------------------------------------------------------------------------------------------------------------------------------------------------------------------------------------------------------------------------------------------------------------------------------------------------------------------------------------------------------------------------------------------------------------------------------------------------------------------------------------------------------------------------------------------------------------------------------------------------------------------------------------------------------------------------------------------------------------------------------------------------------------------------------------------------------------------------------------------------------------------------------------------------------------------------------------------------------------------------------------------------------------------------------------------------------------------------------------------------------------------------------------------------------------------------------------------------------------------------------------------------------------------------------------------------------------------------------------------------------------------------------------------------------------------------------------------------------------------------------------------------------------------------------------------------------------------------------------------------------------------------------------------------------------------------------------------------------------------------------------------------------------------------------------------------------------------------------------------------------------------------------------------------------------------------------------------------------------------------------------------------------------------------------------------------------------------------------------------------------------------------------------------------------------------------------------------------------------------------------------------------------------------------------------------------------------------------------------------------------------------------------------------------------------------------------------------------------------------------------------------------------------------------------------------------------------------------------------------------------------------------------------------------------------------------------------------------------------------------------------------------------------------------------------------------------------------------------------------------------------------------------------------------------------------------------------------------------------------------------------------------------------------------------------------------------------------------------------------------------------------------|
|                   |      | <p> <i>TMEM273 MORN1 CCDC186 CFH PAXIP1-AS2 LINC01695 PTPRB INTS8 LINC01412 ITGA1 VN1R7P MARCHF6 CCNG2 ATG4B CIBAR1 ODR4 GAGE13 TANC1 CORO2B PAPPA DHX40 KIFC1 POC5 IGHV11-65-1 TRPC7 SYCP1 VPS41 DTX1 MYO10 GF11B ZNF407 MIR3118-4 ASB3 TENM3-AS1 KIR3DL2 GAGE12J TRIM43 FOXO6 TSHZ2 C1orf21 TOM1L2 STOX2 FAR2 BICRAL PLAGL1 NEK7 NKG7 CNN2P12 NLRP13 COG2 RPL5P35 ERN2 CYP2C58P TLNRD1 SERPINB2 KSR1 AOX3P LINC01322 GABRB1 ANKS1B RP1 LUC7L AKAP10 TTLL7 EFCAB14 SLC16A9 WWC1 PLEKHA3 RSRP1 BLM PLA2G4A SENP6 GATAD1 ZBTB16 DDX39AP1 UNK B4GALT6 ATG5 LINC01938 SGTB TRIM60P19 ZNF875 XKR5 SCGN SYNJ2 STK32A ARSB IL34 ZNF234 CLVS2 DIO2-AS1 SIGLEC29P DPYSL5 CWC27 AGK USP25 ASCC2 SLC44A1 CNM4 ADAM10 ATXN3 GALT MRPS22 TMC1 PLD5 OXR1 PAK3 CAMLG TSPAN33 GARNL3 RNU6-1150P NPIPA1 TPM1 CES1P2 CIDEC EBF1 DHTKD1 OB11-AS1 FLNB OR2T2 MADD PCID2 LINC00667 NDFIP2 DUX4L45 ZSWIM6 MYL1 ANKRD36BP2 CAMK1G DSG1 C1orf87 LINC02327 FAM30A PDZPH1P ERICH3 TRERF1 CENPBD1P1 TADA2A RPL15P2 LRRC9 LINC00158 FBN1 NIPAL2 MTUS1 GABRA6 PTPRVP DHRS3 PRRC1 PANTR1 LASP1 VPS35L ABHD17C KRT6A C21orf91-OT1 GGT4P DROSHA ZNF813 ANKRD31 PALS2 ADCY10 FAM149B1 PDE1A TMPRSS2 LINC02165 PTAR1 PRICKLE2 CMAHP ANGPT1 TRIM58 HMGA2 HHAT KLHL32 CHASERR PSTPIP2 MVB12B C4orf50 LINC02253 UBASH3A CACNA2D3 SEL1L ELOC SLC7A2 TMEM67 BTF3L4 MIR3936HG ZNF618 ITGA4 CPA6 AGO1 PRKCE DEFA3 GLYATL1 RBPJP5 PTPRK MIR3142HG CNTN3 GLIS1 ODAD2 ARHGAP31 RXRG ETNPPL KIR2DS4 PRKAA2 CD163 ARMC3 BBS2 SYT1 OR4F15 LATS2 IKZF2 PPP1R12B APCDD1L-DT PDE2A DNMT3L ASPM RFC2 PPARA PLXNA2 KLHL33 DENND2C LINC01602 TBC1D13 CDYL2 SCARA5 PRG4 SCGB1D1 RANBP3L MARK2P12 TG ADGRB3 HGD SLC36A1 PLCB1 UBE2R2 KCNH8 ATP6V0CP3 LAMB1 ANKRD19P RPS10P7 CUL5 HOMER2 DGK1 RIN3 LINC01221 REG4 LINC01151 DIP2B CD5L LINC01524 TBC1D30 IGLV2-14 NME7 STXBP6 TFDPI FAM66E ZBTB33 MX11 ZNF876P PPME1 TRAPPC8 OR4R3P STX12 LINC02291 FUT9 MOK GARS1-DT CREG1 LINC02488 SLC12A1 SCN2A MAPKAPK5P1 WNT7A TUBB6 ZNF449 DOCK10 FAM27C PAMR1 DDX6 SPIRE1 TMEM71 COG5 AIMP1 UBE2E1 ARAP2 LDB2 LINC02149 SNX30 ATP8A1 BCL2L1 IQSEC1 LINC02008 JARID2 LINC02236 SHROOM3 ADK PRR5L ALX4 CORIN FAM241A LINC00838 RANBP17 WNT2B MRPS27 PPM1L CPHL1P LRRC37A3 TRIM43CP PRPF18 SMOC1 GSTA3 EXD3 SETDB2 FAH MON2 OR51E1 TMEM116 TOGARAM1 SLC45A4 ZNF705B ELF2 SEMA3D LDLRAD3 GLYAT KIF15 CFTR VSX1 TBX20 FLRT2 NFATC2 NALCN-AS1 PRAMEF25 KRTAP20-4 ARHGAP44 MTMR2 ZNF970P KCNH5 FAM189A2 CADM1 KLHL29 PTPRO ARID3B OPRM1 ACER2 ZDHHC14 RGS9 YLPM1 ATF6 ITFG1 IPO11 VCL SLC13A5 GLB1L3 ABCA9-AS1 DOCK5 VCAM1 C7orf31 LINC02511 LINC01818 ATP6V1C2 MAGEL2 IFT81 NHSL1 OSCP1 PLEKHA8 SGO1-AS1 DTHD1 SRGAP3 IGHV11-13-1 HAAO CTNNAL1 CIBAR1-DT CYP2A7P1 ATP6V0D2 SYNJ1 PHF20L1 HLA-B KLF15 PPP2R2B NEDD9 HDHD5 IL12A-AS1 ANKRD66 ENPP1 SDR42E2 LYRM4 CCDC150 DNMI1P47 LINC02099 HEMGN RIMS2 UGP2 RP1L1 PPM1F OR4K8P EFCAB6-AS1 CHSY3 YBX3 YAP1 ARL15 ANK3 BMPR1B LINC01173 FCRLA LINC01937 SEMA5A C1orf127 PRDM15 KITLG KRT6B SV2C DAW1 COL5A1 IGHV3-74 IFT57 LINC01426 RIPOR2 MAP4K4 LINC02899 ZNF112 FICD KIF21B FEZ2 ATE1 PEG10 INHBA-AS1 HSPD1P3 NMD3 OLA1 GATAD2B VPS13C ANKRD55 XIRP2 KRT85 SLC14A1 CA1 C5orf52 FAM72C MFSN9 SERPINI2 STK38 APBB1IP NPL CAST TBC1D9 FBXO32 AOA1 SNHG14 TSBP1-AS1 SMG1P4 SNAI2 ZBTB49 FAM90A28P PHF2P2 AP4E1 DLEU1 NDFIP1 TNF FAM180A LHX9 LINC02074 OCA2 ST8SIA6 DAPK1 MSANTD2 FCHO2 RFTN2 TRAV8-6 COL6A6 RN7SL767P DNAH5 CNTN6 CLIC6 LINC02406 FMN2 BHLHE40-AS1 SEMA3C VAV1 LINC00895 CACNA11 BTG3 DPY19L1 CSF2RB CMTM7 RPS6KA3 SMAD5 DNAJC13 BCKDHB PPIL6 IGLV3-30 CNST PATL1 UBE2J2 ASB2 OTOF1 PSME3IP1 OR4F6 GHRH UGT3A2 GOLGA8B RNLS IGLV4-3 SPOCK1 LINC02315 NF1P6</i> </p> |
| 4C-decreased-1200 | 1122 | <p> <i>LRRC37A5P CCDC116 ZHX3 APOL2 RPS4XP6 PDCL3 PTPRR HERPUD2 CRTAM SLC52A1 UBE2G1 PELI2 TPI1P1 NOS2 MIR548H4 ZEB1 LINC01708 FAT4 PARN SEMA4D SLC15A2 RN7SL483P WSCD1 MIR4435-2HG KND1 LINC02355 ZFYVE1 EVC HERC2P2 LINC00670 DMC1 CXADR SPPL2B C9orf43 DIP2A NBP21P OR7E19P RIOK1 GGT2 UNC45B LUZP1 LINC01346 BVES-AS1 ZNF723 LINC01138 CECR2 LINC01782 SMYD3 GNAS DYSF NPM1P2 CD38 SERPINB9 LINC01876 PGBD5 LAIR1 MSH6 RASGRF1 HECTD2 FBXO31 C12orf40 LINC01163 GMPR RIN2 PRDM16 FRRS1 PDE6C RNF217 TRAPPC9 LINC00323 MEIS2 CARMIL1 PCDH7 BCL2 KL LRRC4C LINC02558 RACGAP1 MIR3667HG THADA NUP37 PPP1R9A SAA3P TMEM117 KCNK15-AS1 TOX3 TDRD5 TASP1 SNX6 POTE GOLGA6L3 SAMM50 ZZEF1 FRA10AC1 HHLA2 NCF4-AS1 C3orf52 SLAMF1 UQC1 RGL1 ATP5PBP3 SHOC1 LINC00841 FAAP24 INO80D KDM6A MED27 NCAM1 PDYN-AS1 GDAP1L1 LINC02096 LINC01358 UFL1 EPHA4 LINC01967 PLA2R1 LYSD2 NGDN H1-9P ADAMTS2 GTSF1L WARS2-AS1 CCDC172 FRYL LINC01828 GPRC5C COLCA1 CPAMD8 RNU6-929P GPR1-AS UBL7 LINC02675 CALM1P2 RBM6 MEGF10 IGHV2-70D HS1BP3 LIPI LINC01445</i> </p>                                                                                                                                                                                                                                                                                                                                                                                                                                                                                                                                                                                                                                                                                                                                                                                                                                                                                                                                                                                                                                                                                                                                                                                                                                                                                                                                                                                                                                                                                                                                                                                                                                                                                                                                                                                                                                                                                                                                                                                                                                                                                                                                                                                                                                                                                                                                                                                                                                                                                                                                                                                                        |



|  |                                                                                                                                                                                                                                                                                                                                                                                                                                                                                                                                                                                                                                                                                                                                                                                                                                                                                                                                                                                                                                                                                                                                                                                                                                                                                                                                                                                                                                                                                                                                                                                                                                                                                                                                                                                                                                                                                                                                                                                                                                                                                                                                                                                                                                                                                                                                                                                                                                                                                                                                                                                                                                                                                                                                                                                                                                                                                                                                                                                                                                                                                                                                                                                                                                                                                                                                                                                                                                                                                                                                                                                                                                                                                                                                                                                                                                                                                                                                                                                                                                                                                                                                                                                                                                                                                                                                                                                                                                                                                                                                                                                                                                                                                                                                                                                                                                                                                                                                                                   |
|--|-------------------------------------------------------------------------------------------------------------------------------------------------------------------------------------------------------------------------------------------------------------------------------------------------------------------------------------------------------------------------------------------------------------------------------------------------------------------------------------------------------------------------------------------------------------------------------------------------------------------------------------------------------------------------------------------------------------------------------------------------------------------------------------------------------------------------------------------------------------------------------------------------------------------------------------------------------------------------------------------------------------------------------------------------------------------------------------------------------------------------------------------------------------------------------------------------------------------------------------------------------------------------------------------------------------------------------------------------------------------------------------------------------------------------------------------------------------------------------------------------------------------------------------------------------------------------------------------------------------------------------------------------------------------------------------------------------------------------------------------------------------------------------------------------------------------------------------------------------------------------------------------------------------------------------------------------------------------------------------------------------------------------------------------------------------------------------------------------------------------------------------------------------------------------------------------------------------------------------------------------------------------------------------------------------------------------------------------------------------------------------------------------------------------------------------------------------------------------------------------------------------------------------------------------------------------------------------------------------------------------------------------------------------------------------------------------------------------------------------------------------------------------------------------------------------------------------------------------------------------------------------------------------------------------------------------------------------------------------------------------------------------------------------------------------------------------------------------------------------------------------------------------------------------------------------------------------------------------------------------------------------------------------------------------------------------------------------------------------------------------------------------------------------------------------------------------------------------------------------------------------------------------------------------------------------------------------------------------------------------------------------------------------------------------------------------------------------------------------------------------------------------------------------------------------------------------------------------------------------------------------------------------------------------------------------------------------------------------------------------------------------------------------------------------------------------------------------------------------------------------------------------------------------------------------------------------------------------------------------------------------------------------------------------------------------------------------------------------------------------------------------------------------------------------------------------------------------------------------------------------------------------------------------------------------------------------------------------------------------------------------------------------------------------------------------------------------------------------------------------------------------------------------------------------------------------------------------------------------------------------------------------------------------------------------------------------------------------|
|  | <p> RAB38 DZANK1 CLTCL1 NUA1 PCAT1 KCNK10 ZNF738 BLOC1S5-TXNDC5 SLC16A1-<br/> AS1 VMP1 NENF HRH2 VSTM4 ATP6AP1L RNU2-47P RDX SNTG2 CTSB SVIL NDRG2<br/> APBA2 TTC3 COL23A1 NEDD4L EDAR C5 EGF LINC00960 ATP2B2 HDGFL3 RPL37P3<br/> CCNYL3 ABCC12 PARK7 DSTYK RIMBP2 ZNF271P IFT43 ADAMTS19-AS1 SNRPC<br/> C2orf69P4 DRC7 DSE POTEJ LINC01427 MYCL LINC02256 TPTE2 SPAG6 BMP7<br/> PDE4DIPP1 GALNT2 FGF12 EPHX4 CYP2C9 CNOT7 CASC9 IMPACT ITGA6 HHIPL1<br/> NOTCH2 IMPA2 ZFP90 S100B ARHGAP12 USP43 KCNN3 FKBP5 NFAT5 FLI1 ANAPC1<br/> GRM1 LINC02147 ARHGAP26 ITGB8 GAP43 LINC02422 OR4K3 PRDM13 PDE3A PTPN4<br/> BCAR3 MAP6 APOL1 CDH11 SETBP1 AIF1L CDS2 ZNF780B LINC01900 ATP6V1E1<br/> LINC01993 LMX1A AGBL1 RSPH3 DEFT1P2 LINC02439 ZFAND6 GBP4 CNKSR2 PSMA5<br/> DPH6-DT GFRA2 NEK10 ADCYAP1R1 SNX29 MAGI2-AS3 ZNF611 STAT1 SAMD5 MROH5<br/> SLC44A3-AS1 MYOCD CREM GOLGA8J XKR3 UBE2QL1 PLPPR5 TDP1 AVL9 EFEMP1<br/> TNRC6B WBP2P1 LINC02542 SYN2 PTC2 MYO1E SMOC2 MIPEP NCSTNP1 HDAC2-AS2<br/> HLCS FH RWDD2B PLPP4 STK10 PWRN4 CCDC102B SDS GSR CCDC162P LINC01571<br/> FIG4 SOGA1 ARHGAP32 BMF NECTIN1 FLT1 RB1CC1 ZNF528 LINC01222 LALBA NXN<br/> LINC00375 FOXJ3 CENPE CKMT1B MYL12B RSPH14 IL17RD ANKMY1 HCG22 APELA<br/> UBN1 PLA2G12B FAM83B HDAC4 CTNNA1 STK36 GNAI2P1 FAM102A NCOR1P1 TRPC5<br/> MYO9A TMEM182 IL10 LINC02305 AMFR LIFR-AS1 C19orf18 FTO SLC6A1 EPC2 DMXL2<br/> SEM1 SEMA6A-AS2 MOGAT3 TMEM236 NLK THSD7A CXCL2 GOLGA6B LINC00334<br/> CARD10 ACSBG1 GCSAML DNPEP TRAPPC11 HOXC4 IGHV3-62 NECTIN4 CNMD<br/> LINC01309 UFD1 LINC00299 BAZ2B HERC2P3 CRACD NGF-AS1 AGL PALMD HS6ST1<br/> MARK2 MEOX2 SF11 ZBED9 CTSE ATF2 PLEKHB2 FAIM ZNF72P RPRD1A ZNF880<br/> PPP2R2A ESS2 PHAF1 ZNF541 RBBP8 AK6P2 CKMT1A RFC1 NSUN6 LINC02174 CDC45<br/> MC2R AKR1B1 BTBD11 LRP2 LINC02087 HERC2P9 SYNE1 MTHFD1L RALGPS2 HOATZ<br/> SNRK ABCD1P4 EXTL3 EHMT1 TTC29 FBXO47 KRT89P ZNF735 ZBTB10 PKHD1L1<br/> SLC9B1P4 PLPPR1 CEP192 SLC26A2 CAMK4 GUSBP11 CLPX OR7H1P ROCR<br/> ANKRD20A9P HDAC11 SLC9A4 ANKRD20A17P GRIK3 GRXCR1 NUMB STPG2 MIDEAS<br/> TM9SF2 CD70 CELF2 SH2D1B ZNF606 ESYT2 HEATR6 ARFGAP3 MAPRE2 FGF10 TAPT1-<br/> AS1 KRT18P59 ISX RAD51AP1 POTE SYBU SMTN LINC01035 PDE4DIP SCG3 ESRP1<br/> RIC8B TAF3 ZMYM4 TPTE FRG1JP MED12L GRM7 ZDHHC21 BRMS1L DDHD1 ICA1<br/> PLEKHD1 CDH7 EMILIN2 TLDC2 CYCSP39 HORMAD2-AS1 VASP PLGRKT UBE2E2<br/> UNC80 SDE2 PTGFRN PPA2 ILDR2 IMPP2L ZNF615 SPSB4 SPSB1 GABRG2 ZNF567 ITCH<br/> NUDCD3 MBP S100BP TANGO6 GABRA5 CELSR2 CDKN2C STXBP1 SLC46A3 PTPRJ<br/> DLC1 PNPLA7 SELENON RPS3AP4 CNIH1 FRG1BP C2orf69P3 LINC00114 ZIM3 MANBA<br/> DUX4L2 CHRM3 ECT2L UST MIR663AHG CALD1 LINC01543 AIG1 ERICH1 DEDD2 TYW1<br/> TAF15 ALB ARHGAP24 JPH1 ANKRD20A3P EFR3A HTR2A TPH2 N4BP2L1 IGHV1OR15-9<br/> TPTE2P6 EIF4BP3 LOXHD1 MDS2 GOLGA8G LINC01622 GALNT1 MARCHF1 OR4L1<br/> ZBTB25 INO80 RBM15-AS1 HSD17B14 KRT16P6 COL27A1 GLP2R CHCHD2 BMP5 SLC4A4<br/> ZNF675 LINC02366 GOLGA6L17P SYT16 CRYBG1 TWIST1 HACD2 LINC02653 LINC02061<br/> RPL15P3 TRIM77BP ERCC6L2 PASK PHKB RUFY2 SLC16A1 RANBP9 FAM245A MRTFB<br/> LINC01344 KCNE4 TRIM5 LINC02228 KRTAP21-3 LINC01801 LINC01320 LYPLAL1<br/> THNSL2 BRWD1 COLQ TMEM54 PPIP5K1 C9 TMTC2 HECW1 MCTP1 RNU1-51P MOB3B<br/> ACTR3C LCE1F ARPC3P2 MAP4 TSPAN11 MTND1P17 HIVEP1 ATRX TNIK KRT18P55<br/> OR1L6 NBN PRTG OR2T7 SLC17A1 SEC24D RGM B KMT2E WNK2 FRMD3 RBFOX3<br/> SDAD1P2 PWWP3A ITIH5 PACSIN2 TRGJ1 HOXC13 PKP1 SYNE2 GTF2IP6 MIR181A1HG<br/> TRMT61B TRIM23 FABP7 SDCCAG8 GK LINC00355 DUSP22 CNJ18 CHSY1 RFC3<br/> MAB21L3 SMPD4 EXT2 PTPN12 GPR137B ZYG11A LINC00434 LINC02424 TOP3B MPPE1<br/> RGS3 UBA6-DT ANKRD26P1 CMIP DEFB116 SLC2A13 FBN2 YTHDF3 SPATA17 SYT10<br/> ZBTB38 LINC02380 CYFIP1 ALK DOCK8 GON4L GREB1 ARNT LINC01340 LINC00929<br/> CSTF3 ZNF648 LINC02058 SAMD13 DNAH6 ARFGEF3 TMC05A UHRF2 EPCAM-DT<br/> DCLK1 DEFT1P RNF215 ANKRD28 GRK3 SND1 IFNG-AS1 SNAP25-AS1 ZFAND4<br/> LINC01664 FGD4 ETS2 LINC00649 ZNF382 NDUFAF6 GOLGA6D ERMP1 CATSPERG<br/> ARL4C ITS2 LINC01917 KTN1-AS1 HIRA OSER1-DT SERPINB7 ANKS6 TMEM74 PRKAA1<br/> RASGEF1C TAF4A ALDH1A2 GABRG1 MTTP POGK CROT MAPK9 ESSRG FBXW2<br/> LINC02458 LINC02652 LINC01229 FOXJ2 AGAP9 ABCC4 MYT1 FRG1HP ABCD2 ZNF595<br/> EMP1 TMEM171 LNCAROD RRAS2 SV2B FAM110A NRBP1 SEC14L3 STK38L GTF2F2<br/> RALGAP2 FAM245B ADAMTS19 ZNF236 RAB27B SOX30 LINC01337 MYOF P2RX6 PLS1<br/> UNC79 RSPH1 SPON1 ANK2 SH3GL3 CFHR4 INVS FHL2 NCAPG2 LPCAT2 LNP1 TPTE2P5<br/> PHF19 ADAMTS14 ZNF518A LINC02191 IGLV3-31 KYNU DCAF1 ZCCHC7 CD2AP TTC39C<br/> LINC02680 ZNF124 EBF3 TAF4A NFKBID SPRED1 MYO5A CIDEA LINC01924 PPP2R2C<br/> PWRN1 LINGO1 LINC01706 SEPTIN9 SMPDL3A LRFN2 ACO1 WDFY4 SCA1 PAPP2 LTNI<br/> TINAG NCOR1P3 DIRAS2 ABCB5 HEATR4 SLC5A9 KLHL4 DPY19L2 MDM1 RRBP1 SMPX<br/> OVOL2 CD9 MTMR10 EIF3F CDHR3 CSE1L NEK2P2 TOM1 FAM118A PRUNE2 SGMS1<br/> ANKRD24 COL25A1 RBPMS2 ITPR2 CYP4A11 BRINP1 IGLV2-34 MTND2P8 RPL23AP7 </p> |
|--|-------------------------------------------------------------------------------------------------------------------------------------------------------------------------------------------------------------------------------------------------------------------------------------------------------------------------------------------------------------------------------------------------------------------------------------------------------------------------------------------------------------------------------------------------------------------------------------------------------------------------------------------------------------------------------------------------------------------------------------------------------------------------------------------------------------------------------------------------------------------------------------------------------------------------------------------------------------------------------------------------------------------------------------------------------------------------------------------------------------------------------------------------------------------------------------------------------------------------------------------------------------------------------------------------------------------------------------------------------------------------------------------------------------------------------------------------------------------------------------------------------------------------------------------------------------------------------------------------------------------------------------------------------------------------------------------------------------------------------------------------------------------------------------------------------------------------------------------------------------------------------------------------------------------------------------------------------------------------------------------------------------------------------------------------------------------------------------------------------------------------------------------------------------------------------------------------------------------------------------------------------------------------------------------------------------------------------------------------------------------------------------------------------------------------------------------------------------------------------------------------------------------------------------------------------------------------------------------------------------------------------------------------------------------------------------------------------------------------------------------------------------------------------------------------------------------------------------------------------------------------------------------------------------------------------------------------------------------------------------------------------------------------------------------------------------------------------------------------------------------------------------------------------------------------------------------------------------------------------------------------------------------------------------------------------------------------------------------------------------------------------------------------------------------------------------------------------------------------------------------------------------------------------------------------------------------------------------------------------------------------------------------------------------------------------------------------------------------------------------------------------------------------------------------------------------------------------------------------------------------------------------------------------------------------------------------------------------------------------------------------------------------------------------------------------------------------------------------------------------------------------------------------------------------------------------------------------------------------------------------------------------------------------------------------------------------------------------------------------------------------------------------------------------------------------------------------------------------------------------------------------------------------------------------------------------------------------------------------------------------------------------------------------------------------------------------------------------------------------------------------------------------------------------------------------------------------------------------------------------------------------------------------------------------------------------------------------------------|

|                  |      |                                                                                                                                                                                                                                                                                                                                                                                                                                                                                                                                                                                                                                                                                                                                                                                                                                                                                                                                                                                                                                                                                                                                                                                                                                                                                                                                                                                                                                                                                                                                                                                                                                                                                                                                                                                                                                                                                                                                                                                                                                                                                                                                                                                                                                                                                                                                                                                                                                                                                            |
|------------------|------|--------------------------------------------------------------------------------------------------------------------------------------------------------------------------------------------------------------------------------------------------------------------------------------------------------------------------------------------------------------------------------------------------------------------------------------------------------------------------------------------------------------------------------------------------------------------------------------------------------------------------------------------------------------------------------------------------------------------------------------------------------------------------------------------------------------------------------------------------------------------------------------------------------------------------------------------------------------------------------------------------------------------------------------------------------------------------------------------------------------------------------------------------------------------------------------------------------------------------------------------------------------------------------------------------------------------------------------------------------------------------------------------------------------------------------------------------------------------------------------------------------------------------------------------------------------------------------------------------------------------------------------------------------------------------------------------------------------------------------------------------------------------------------------------------------------------------------------------------------------------------------------------------------------------------------------------------------------------------------------------------------------------------------------------------------------------------------------------------------------------------------------------------------------------------------------------------------------------------------------------------------------------------------------------------------------------------------------------------------------------------------------------------------------------------------------------------------------------------------------------|
|                  |      | <p>GRB14 LARP6 RXFP1 IGSF5 LONP2 CCDC192 LEMD3 PEX6 CHKA BUB1 INTS4P1 VPS13D KRTAP21-2 ZNF292 SPIN1 TBX15 PRB3 TTC3P1 KPNA1 SKA1 CCND3 LAMC1 SRP9 SCGB2B2 GABPA SMIM11B DSG1-AS1 PCNX1 DUXAP10 LINC02091 NAA35 ATP5PF RPF2 UBAP1L MX2 AGGF1P10 MTCO1P1 ITGB3BP ZNF831 PRAMEF2 ENTPD5 DGKK SLC4A10 LINC00844 TSSC2 LIX1-AS1 TGM1 AGAP14P MGAM FTL13 ZDHH18 LINC01310 PSG9 FAM183A UHRF1BP1L IL1RAPL2 APIP MUC19 SCAPER IKBIP NPHP4 LINC02141 OR8B9P CBLIF ATP6V1B2 KCNJ1 LRRTM4 CLCA4 PSAP LINC01877 MYOM2 SLC5A12 NCS1 ONECUT1 PCDH11Y METAP1D USP31 HIVEP2 SUMO2 OR5A91P MICOS10 XPNPEP1 GLYATL3 NUBPL PCGF5 FGF7P1 NLRC5 TUBBP9 LINC00363 NDUFAF2 GUCY1A2 KREMEN1 UMODL1 LINC01189 MB LINC00383 WDR25 SOD1P2 CYP4Z1 LCE3D TNPO3 EFHB ACSM2A FGF9 DCUN1D4 DAZL RPL23AP53 SLC1A1 HPCAL1 SPG21 ANKFY1 LIMCH1 ZKSCAN5 CCDC195 TSHZ3 TMCO4 LINC02098 RALA GMDS-DT BAZ2A MIR548A1HG RPS12 GNPTAB TRPM1 NTN1 COPS8 SACM1L AKAP9 C1QTNF3-AMACR AP4S1 NR5A2 PRKD1 TRAV8-1 TNFAIP8 RBM47 TMEM260 GBP6 SANBR DBF4B OR9Q1 CCL28 FBXO41 MICAL3 SNRPN HDAC2 MSI2 MRTFA LRRC7 LINC00221 ETS1 TNN CASZ1 PCDH8 LINC01673 WDHD1 MIR155HG MAMDC2-AS1 RABEP1 ST6GAL2 LINC00930 NUTM2HP SLX4IP PTCHD4 BANP ALKAL2 MAP2 YME1L1P1 TGFA SNX3 LINC01422 ZNF280B PTPRA CEACAM7 TNRC6C TMEM161A CYLD DEFB108B OR11G2 LINC02451 WSCD2 UBE3D GLIDR ZNF402P CAPN5 CERS3-AS1 RPL23AP87 GOLGA6C ABCA4 ZFAND3 LINC01718 THUMP2 C6orf118 FAM83F CNKSR1 RAB12 TMEM163 PCDH9 LINC02235 DIPK1A SLF1 EXOC1L RBMS3 POTEH GNA14 INMT-MINDY4 LINC01992 SRFBP1 COPB1 MATN2 TM7SF3 IL33 EFCAB2 MARK4 CRACR2A CLEC16A LINC01901 OR2T3 SERPINB10 PROX1-AS1 ACTN1-DT ARHGEF17 ME3 PSG6 CACYBP ITGA9 PPP1R1C ULK2 IARS2 UNC13C CDC42BPB HNRNPH3P1 TMEM44-AS1 LINC00298 FAM217B MTRF1 FAM25G SHROOM2 OVCH1 CISD1 C16orf95 CRTAC1 EGLN3 PRKAB1 RALGAPA1 LMX1B LINC01748 L3MBTL3 RRAGD IGKV2OR22-3 POMT2 MICALL2 ST13 LINC02245 CLIP1 MARCHF8 SHC4 C2orf42 CABLES1 MORC2 ZNF613 TLL1 DEFA8P FRMD6-AS2 DUSP16 BCL11A AKR1C3 PPP2R5E ASB7 FREM1 IL20RB ADAM22 RABL2A PTGS1 LINC02582 LINC01811 CNIH3 RPF1 TRIT1 CEPT1 WNT5B CEP44 HKDC1 CLNS1A EPS15L1 HIP1 PVT1 CHN1 ETV6 WNT9B RFX7 TRPS1 SKINT1L IGKV3OR22-2 ADAMTS5 NF2 STRN CRISPLD2 NPM1P1 ANTXRPL1 MTMR3 ZNF845 RN7SL250P FAM25C CRKL ITPRIP H2BC15 ADGRA3 SCG5 CLDN18 LINC00581 ADCY9 DPP10 TUBB2BP1 GALNT16 CDH5 ANO6 ZNF600 HIPK1 A2MP1 PGPEP1 ACSM2B TTC7B ATP2B1 IFI44 RETREG1 NLRP14 NPHP3-AS1 PAH FAM138E ATRN FBLN5 CNOT6L TRAPPC6B TOP1 ZNHIT6 SLC39A6 WDSUB1 ANKRD20A7P</p> |
| upregulated-1285 | 1133 | <p>TFIP11 UTP20 ERAL1 H2AZ2 TKT LRRC41 SLC25A3 IRAK1 G3BP1 NUP155 DDB1 RNU6-322P DAZAP1 EP300 MITF DDX5 IMP4 CLUH ZNF131 HROB MSH3 NOSTRIN LYAR SPN ARF6 IPO9 MED13L MRPL1 NOC4L MNS1 NAT10 FADS1 PCYT2 FAHD1 ARHGAP21 ACTR8 ENSG00000261770 STK25 SLK BSN NASP NOL8 BAZ1B GRPEL1 LMNB2 SDAD1 SLC25A46 INTS6 CLTA CEP350 RBM10 BCLAF1 TRA2B RAD23B STK17A CHRAC1 NEFH CCNY SSU72 TRUB2 IP6K1 SRSF6 ZNF598 POLE3 HSPD1 DUS3L BOP1 POLR1E C1orf216 CCAR1 EP400 GPN2 UBR3 TUBB KIAA0100 HNRNPR GCLM HBZ ZNF75A ADI1 ZNF239 SAMSN1 SON PTP4A2 TRAM1 PSMD3 RHEB RAB35 OTUD6B NPM1 TSR3 XRN2 FUS CELF1 ABRAXAS2 SEC23IP CNOT1 RCSD1 DDX18 PPP2R5A CCT8 EIF3M SRP72 ZNF24 DDX49 CAPN1 TRIP12 BTF3 ATAD3B IKZF3 PRXL2C SETMAR EZR DYNC1H1 TMEM33 ABCF2 WDR6 ITFG2 DHX16 MIS18BP1 KIF2A HGH1 HSPA8 MRPL15 KCNQ5 DHX15 NEU1 WASHC5 SPRY2 LTBR NOP58 TBC1D9B SF3A3 FUBP1 HCFC1 AHNAK TRMT6 DHFR EIF4A3 ATP6V1C1 PRPF3 ALYREF UBE2N FAM83H ENSG00000286122 LINC02393 PPM1H NFYC SSRP1 STRIP1 ASXL2 CCDC6 MTHFD1 CYP3A5 FTH1 IER3 PITX1 IL17D GRWD1 JUND PHB2 LIN28B TNF MRT04 ERMAP DDX39A C1QBP TIMM17A ASAP1 PDSS1 HNRNPA0 AMMECR1 TCP1 BRCC3 TRAM2 KLHL21 EIF3D ZNF586 SET NAB2 FAM120A AURKAIP1 POLR1A TAF9 CRCP BICD1 CORO1C FTH1P16 JRK RANBP1 FDFIT1 SQLE EIF5A WBP11 ZNF614 MCM10 TMEM69 TMEM185B GABRE HNRNPK ELF1 ICE1 SAFB2 BEGAIN OXAIL TRIM35 USP11 PRKDC PSIP1 EXOSC3 ADD1 NOL11 E2F4 IPO5 ACLY IK SURF4 NACA GPX4 CDK4 PRMT1 TEX10 CEBPZ MCM5 CLN6 CSNK2A2 SRRT RBM3 RABGGTB CUL3 NFATC3 KMT2B TSPYL5 MIX23 FASTKD2 HRAS RABL6 NR2F2-AS1 DHCR7 NUTM2B-AS1 SLC19A1 AHCTF1 VAT1 APEX1 CAVIN2 MRPL11 MYC UBE2L3 NAA15 ENSG00000279348 TOMM22 MUS81 ARID1B YES1 VCP ABT1 ARID2 SMG1 RAVER1 RCC1 SRSF3 CALM2 ENSG00000287905 WDR82 FUT8 ZNF74 RBMXL1 STMN1 NRROS ENSG00000282386 CWC25 MT-RNR1 NR2F2 PES1 MS4A3 ENSG00000288271 LINC24 PTDSS1 ENSG00000253853 CHTOP ENSG00000276742 ZFX HMGCR URB2 YBX1 STK24 NCOA5 H2BC12 BUB3 CTR9 CDC27 MCCC1 VPS35 VAC14 HNRNPH1 OR10Z1 CITED2 KPNA4 PFAS NUCKS1 HNRNPD U2AF2 YWHAG TRMT1 KMT2D ZMYND19 EIF5B WDR70 UTP25 LMNB1 MAF1 MT-RNR2 TFAM PUM2 PIK3C2B HHEX SRSF7 GTF2H1 VKORC1L1</p>                                                                                                                                                                                                                                                                                                                                                            |

|  |                                                                                                                                                                                                                                                                                                                                                                                                                                                                                                                                                                                                                                                                                                                                                                                                                                                                                                                                                                                                                                                                                                                                                                                                                                                                                                                                                                                                                                                                                                                                                                                                                                                                                                                                                                                                                                                                                                                                                                                                                                                                                                                                                                                                                                                                                                                                                                                                                                                                                                                                                                                                                                                                                                                                                                                                                                                                                                                                                                                                                                                                                                                                                                                                                                                                                                                                                                                                                                                                                                                                                                                                                                                                                                                                                                                                                                                                                                                                                                                                                                                                                                                                                                                                                                                                                                                                                                                                                                                                                                                                                                                                                                                                                                                                                                                                                                                                                                                                                               |
|--|---------------------------------------------------------------------------------------------------------------------------------------------------------------------------------------------------------------------------------------------------------------------------------------------------------------------------------------------------------------------------------------------------------------------------------------------------------------------------------------------------------------------------------------------------------------------------------------------------------------------------------------------------------------------------------------------------------------------------------------------------------------------------------------------------------------------------------------------------------------------------------------------------------------------------------------------------------------------------------------------------------------------------------------------------------------------------------------------------------------------------------------------------------------------------------------------------------------------------------------------------------------------------------------------------------------------------------------------------------------------------------------------------------------------------------------------------------------------------------------------------------------------------------------------------------------------------------------------------------------------------------------------------------------------------------------------------------------------------------------------------------------------------------------------------------------------------------------------------------------------------------------------------------------------------------------------------------------------------------------------------------------------------------------------------------------------------------------------------------------------------------------------------------------------------------------------------------------------------------------------------------------------------------------------------------------------------------------------------------------------------------------------------------------------------------------------------------------------------------------------------------------------------------------------------------------------------------------------------------------------------------------------------------------------------------------------------------------------------------------------------------------------------------------------------------------------------------------------------------------------------------------------------------------------------------------------------------------------------------------------------------------------------------------------------------------------------------------------------------------------------------------------------------------------------------------------------------------------------------------------------------------------------------------------------------------------------------------------------------------------------------------------------------------------------------------------------------------------------------------------------------------------------------------------------------------------------------------------------------------------------------------------------------------------------------------------------------------------------------------------------------------------------------------------------------------------------------------------------------------------------------------------------------------------------------------------------------------------------------------------------------------------------------------------------------------------------------------------------------------------------------------------------------------------------------------------------------------------------------------------------------------------------------------------------------------------------------------------------------------------------------------------------------------------------------------------------------------------------------------------------------------------------------------------------------------------------------------------------------------------------------------------------------------------------------------------------------------------------------------------------------------------------------------------------------------------------------------------------------------------------------------------------------------------------------------------------------------|
|  | <p> ELOA PPP5C RNASEH2C PCLAF ACP5 WDR33 PRMT5 MAPK1 MPHOSPH10 CHD7<br/> HNRNPA2B1 RNF126 UTP18 SBF1 API5 POLR1B PPP3R1 RBM45 FAM117A SH3YL1<br/> RBM14 SF3A1 CAPNS1 EIF3A DANCER SEC24B LHX4 LINS1 CYB5B TNPO1 EEF1D RRP1<br/> TFAP4 SNX9 ANKRD36C WDR74 MCM7 POLDIP2 R1OK2 STAG1 DHX38 BTBD1 ABCF1<br/> CDT1 CFL1 LRP8 MCOLN3 TGFBRAP1 GPATCH3 PSMG1 TMEM43 EML4 PRPF8 SSB SKI<br/> TIMM23 ENSG00000289474 CTPS1 NUDC EIF3J EMP3 SYNCRIP DNAJC8 STAR JADE2<br/> FARSA TRNT1 TXNRD1 TRMO STIP1 SART1 MTDH SPTA1 HSP90AB1 CCT3 MVK NOP14<br/> NCL GVINP1 GSPT1 CDK7 COPS3 HCG18 TMEM97 MCM2 MCM4 DCAF13 ARPC4<br/> TOMM70 ENSG00000286680 TARDBP TRIM28 DDX21 FKBP15 PWP1 COA7 METAP2 PAN3<br/> ALG8 RIOX1 MED15 SETD1B CDC37 PPP2CA POLR2A ODC1 ZNF26 PPRC1 HAT1 POLE<br/> DNTTIP2 ENO1 SBDS DDX1 AZIN1 HAND2-AS1 RNPS1 KIF1A NOL7 BCL7B PPP6C<br/> TOMM5 PSMC5 CBX3 ANKRD13A SETD1A SYPL1 FAM71F2 SLC39A10 ENSG00000227706<br/> ZNF512B ATP6V0A1 KIAA1586 BRD2 SLC7A1 TIRAP USP36 NONO ZC3H4 MAGOH<br/> ELAVL1 AGPAT5 CSTB SNHG6 VPS72 TCF20 SRM PPM1G AKAP8 XRCC5 CERT1 CUTALP<br/> NFKB1 FOSB H3-3B PCBP2 DUS1L MFAP1 ZNF789 TOMM40 VGF ADNP IGF2R RBM15B<br/> ENSG00000268362 POM121C LARP4 ZMPSTE24 HMGCS1 SNRNP200 RAB10 TOP2B PKP3<br/> DNM1L ZNF252P EXOC7 DEK PSPC1 UPF2 ALMS1 CERS6 BEND3 UBTF GYG1 PHB<br/> R3HDM1 RSF1 P2RY11 KCTD3 GAPDH IFRD2 RRP15 RSL1D1 SBNO1 ADNP2 RBM25<br/> B4GALT5 TPR BICRA MCMBP NAA11 WDR3 PROSER2-AS1 TNPO2 MTCH2 BACH2<br/> PPARGC1B ACTG1 PTDSS2 FAM13B CCDC78 HNRNPU SCAP NEMP1 DDX56 SRRM2<br/> PEBP1 HNRNPA1 ATXN1-AS1 DDX20 KAT7 UTP15 MYBBP1A CCT6A TCOF1 SF3B3 PIM2<br/> CPNE7 BAIAP2 INSIG1 GPR75 TEX15 ARID1A MBD1 RBM48 ARL8B STARD7 TRMT61A<br/> ZBTB40 NCLN CHST3 MT-TL1 RYBP MAEA NCR3LG1 C8orf82 SAFB S1PR3 TRMT2A RTL10<br/> LBR CBFA2T3 RNASEH1 IQGAP2 MYB CDC25A XRCC2 MMS19 PTGER3<br/> ENSG00000271971 KIF26B NBAS EIF4EBP2 DHCR24 LINC01963 ATP6V0D1 TAF4B AFF1<br/> MTA2 SLTM TBC1D14 AXIN1 MALT1 POLR1C ENSG00000288884 ENSG00000285730<br/> TFDP2 NDST1 NOSIP SNHG4 GOLM1 PELP1 LINC00645 KCTD15 C22orf46 EIF3B<br/> SMARCD1 TPP2 MED29 FASN METTL8 PCBP1-AS1 PSMA3 ASCC3 MECP2 H4C8 CLDN11<br/> TMEM18 VPS26A FUBP3 CLCN6 SQSTM1 TMEM127 RALY ZNF274 ZNF581 DAP3 H2AW<br/> PHF3 DCBLD2 DVL2 BTG1 PSMC2 CAMSAP1-DT PCYT1A UBQLN4 RAP1GAP2 EZH2<br/> ATP11A TMEM223 SLC25A5 ENSG00000271781 PI4KA PRPF19 LSM14A TRIR C19orf25<br/> PQBP1 SMARCB1 CHEK1 LRRC58 WDR43 ATP13A3 KIF5B CCT2 NUP153 MACO1<br/> CLPTM1 XRCC6 DHDDS AGPAT3 ABO KCNH2 LETM1 DHX33 CHD3 TEX261 LINC00958<br/> SNRPA GATAD2A ARHGEF2 CASP8 N4BP2 DHX30 ENSG00000177788 CPSF7 PRDX1<br/> CASC3 SNU13 FBRSL1 BAG1 DSG2 HSPA4 ENSG00000266976 MMAB RRP9 SMC1A PSMG2<br/> GNBIL C11orf58 RBM19 RUNX1 CASD1 FADS2 MT-CYB MYO16 EGR1 SLC12A2 PDCD7<br/> GRSF1 EXOSC9 ZFP36L2 PBRM1 FTL VAPA TMPO PPP1CC PAXIP1 YY1 SLBP OXCT1<br/> LEPR AASDHPT MCM3 ANAPC7 DELE1 DDX42 FES YJU2 PITHD1 RPUSD1 FAF1 CDK6<br/> RRP36 CSK MRRF RAPGEF1 SUB1 PRPF6 NAA20 ZNF587B SMARCA5 TIMM10B SF3A2<br/> ARPP19 RIF1 COPS2 H4C5 NAA50 MRFAP1L1 LMO2 RBBP4 PDPR CSNK1G2 DOLPP1<br/> RPL22 SCD SLC38A2 WDR36 CCDC86 MYH10 SPIN4 THOC1 STXBP5 ENSG00000176349<br/> DNAJA1 NOP16 PCNX4 GFM1 RAD51C AP5M1 ENSG00000272341 ADO DPYS TGFBR1<br/> GBP2 LRPPRC RRS1 TICRR TULP4 PRRC2C HNRNPUL1 ECSIT QRFP DCAF7 CLCN7<br/> POLR3E SLC12A9 TXNL1 THG1L SPECC1 PPIA PPP1R10 VDAC1 TJP1 MED6 TPRN<br/> DHX37 ARFGAP2 AATF PRMT6 CENPN TAF4 RETREG2 NXF1 RRP1B DKC1 GART<br/> SLC24A2 THOP1 TFR3 DNAJB6 DHX34 DDX46 AK2 ZNF787 PRPF38B KAT6A EPRS1 ILF3<br/> MLLT3 PLK4 KEAP1 MED16 POLR3C NUP50 DRG1 BEX4 MRPS30 GAB2 MT-ND1<br/> SLITRK6 CTCF ATAD3A TRIP13 CLTC ZNF521 RPRD2 SRSF8 PTBP1 USP37 RAN MCCC2<br/> HEATR1 UFC1 NSDHL KDM3B POLR2D LSS ETF1 GAR1 EIF4G1 HNRNPC ZC3H18 SF1<br/> HSP90AA1 CASP3 FTH1P7 LRRC47 RANBP3 PPAN YWHAB DHX9 BAG6 EIF4B OR2AT4<br/> KIFC3 STX3 PHF5A NCAPH WDR81 ZNF45 AP5Z1 PTMA NAPA SNHG3 GNL3L UHRF1BP1<br/> SGPP2 BRD9 PRKAR2B ST3GAL2 PGAM5 EEF2 RPIA CHCHD3 RBM12 RFWD3<br/> ENSG00000234160 NUP98 SNHG20 NIP7 RNF220 PRPF4 ENSG00000255099 ZC3H7B<br/> UROD COMMD4 SACS NT5C3A NIFK WDR46 CAPZA1 DNAJA2 ZNF512 CSTF2 LYN ZFP91<br/> AHS1 TFB2M FRMD8 NUP188 NOP56 RAI1 MT-TF BPTF TASOR2 DENR TXK DNMT1<br/> ENSG00000284024 FAM136A FOXRED2 ENSG00000261342 AIFM2 CYP20A1 AAMP<br/> CAPRIN1 NLN HNRNPF RREB1 NQO1 HSPA9 SRSF10 RBM42 UTP3 ENSG00000279669<br/> NUP160 HNRNPDL DOK3 FOS EMD CMPK1 PUS7 ZNF451-AS1 XPO1 GNAQ LINC02434<br/> PDZD8 PABPC4 ACAT2 SRSF1 IDI1 GLUL DIAPH1 ZDHC5 RRM2 ELOVL6 C19orf48<br/> HNRNPAB SLC20A1 SLC30A10 FEN1 PPIF IPO7 PCM1 NOB1 STRBP GTF3C4 NAV1 PATZ1<br/> LINC00342 ABCF3 ELOF1 NCBP1 PLAGL2 PDCL3P4 CTS1 SNHG17 SMG5 ANK1 EDC4<br/> GLYR1 PPP4R3A UBE4B TRIM44 CTDSP1 TRRAP LRWD1 AP3D1 ATP6V1G1 LRRC59<br/> KHSRP LYL1 DDX54 MED28 BAP1 KMT2A ZEB2 GDI2 HIF1AN WTAP ACSF3 TMEM201<br/> JMJD1C STK35 CCNH SURF6 MLLT10 RRM1 PA2G4 RRP12 MRPS2 NSRP1 RILP HSPH1 </p> |
|--|---------------------------------------------------------------------------------------------------------------------------------------------------------------------------------------------------------------------------------------------------------------------------------------------------------------------------------------------------------------------------------------------------------------------------------------------------------------------------------------------------------------------------------------------------------------------------------------------------------------------------------------------------------------------------------------------------------------------------------------------------------------------------------------------------------------------------------------------------------------------------------------------------------------------------------------------------------------------------------------------------------------------------------------------------------------------------------------------------------------------------------------------------------------------------------------------------------------------------------------------------------------------------------------------------------------------------------------------------------------------------------------------------------------------------------------------------------------------------------------------------------------------------------------------------------------------------------------------------------------------------------------------------------------------------------------------------------------------------------------------------------------------------------------------------------------------------------------------------------------------------------------------------------------------------------------------------------------------------------------------------------------------------------------------------------------------------------------------------------------------------------------------------------------------------------------------------------------------------------------------------------------------------------------------------------------------------------------------------------------------------------------------------------------------------------------------------------------------------------------------------------------------------------------------------------------------------------------------------------------------------------------------------------------------------------------------------------------------------------------------------------------------------------------------------------------------------------------------------------------------------------------------------------------------------------------------------------------------------------------------------------------------------------------------------------------------------------------------------------------------------------------------------------------------------------------------------------------------------------------------------------------------------------------------------------------------------------------------------------------------------------------------------------------------------------------------------------------------------------------------------------------------------------------------------------------------------------------------------------------------------------------------------------------------------------------------------------------------------------------------------------------------------------------------------------------------------------------------------------------------------------------------------------------------------------------------------------------------------------------------------------------------------------------------------------------------------------------------------------------------------------------------------------------------------------------------------------------------------------------------------------------------------------------------------------------------------------------------------------------------------------------------------------------------------------------------------------------------------------------------------------------------------------------------------------------------------------------------------------------------------------------------------------------------------------------------------------------------------------------------------------------------------------------------------------------------------------------------------------------------------------------------------------------------------------------------------------------|

|  |  |                                                                                                                                                                                                                                                                                                                                                                                                                                                                                                                                                                                                                                                                                                                                                                                                                                                                                                                       |
|--|--|-----------------------------------------------------------------------------------------------------------------------------------------------------------------------------------------------------------------------------------------------------------------------------------------------------------------------------------------------------------------------------------------------------------------------------------------------------------------------------------------------------------------------------------------------------------------------------------------------------------------------------------------------------------------------------------------------------------------------------------------------------------------------------------------------------------------------------------------------------------------------------------------------------------------------|
|  |  | <p> <i>THUMPDI ACTB MSRA UBA2 CMBL SRSF2 DDX51 TCF3 SERPINE1 WDR5 NVL RANBP10<br/> PSMD1 TIMM44 PRPF38A SPART-AS1 RNF40 NOL9 SLC29A2 RBMX CDC123 CIZ1 MDN1<br/> BCCIP DYRK1A SLC9A3-AS1 SLC38A1 ARHGAP6 PAICS DNAJB12 PDS5A CRK NCAPH2<br/> TCF7L2 PKM DDX23 ARHGDIA RBM8A CDV3 ZFR HNRNPA3 QSER1 NOLC1 CANX<br/> CUL4A ENSG00000286064 MCM6 PABPC1 TMX2 SNRPD3 TSR1 ENSG00000247934 CCT5<br/> MCRIIP2 FBXO45 RPUSD4 SNRPB ULK3 ENC1 PNO1 SS18L1 CNPPD1 GTF3C6 SREK1<br/> SF3B4 PSMC3 UBP1 SAE1 ZNF282 CERS2 HDGF SUPT6H SETX WWP2 ZNF326 PAF1<br/> TRMT10C GMP5 EIF4G2 DLAT CDC5L KPNB1 KHDRBS1 NORAD NFILZ PSME3 RELN ST7<br/> METTL3 HMGA1 SUPT7L PARD3 ATP2A2 POM121 PNN DDX3X NUP62 HNRNPL PGD<br/> UBE2Q1 SMG9 CUTA NDC1 WAC CEROX1 EIF3G AMD1 PRMT7 MAD2L2 MAT2A URM1<br/> PAK2 RBL1 CENPF IGF2BP1 ZNRF1 GNL2 SNX17 DCLRE1C UBC <b>HBG1 HBA2</b> PUM1<br/> RAB7A ZNF622 ATP5MC3 MTCYBP18 <b>HBA1</b> </i> </p> |
|--|--|-----------------------------------------------------------------------------------------------------------------------------------------------------------------------------------------------------------------------------------------------------------------------------------------------------------------------------------------------------------------------------------------------------------------------------------------------------------------------------------------------------------------------------------------------------------------------------------------------------------------------------------------------------------------------------------------------------------------------------------------------------------------------------------------------------------------------------------------------------------------------------------------------------------------------|

**Table S15.** Venn diagram showing the intersections of downregulated genes with lists of genes that reveal an increase or decrease in rDNA contacts. Related to Figure 3D.

| Names                                           | total | elements                                                                                                                                                                                                                                                                                                                                                                                                                                                                                                                                                                                                                                                                                                                                                                                                                                                                                                                                                                                                                                                                                                                                                                                                                                                                                                                                                                                                                                                                                                                                                                                                                                                                                                                                                                                                                                                                                                                                                                                                                                                                                                                                                                                                                                               |
|-------------------------------------------------|-------|--------------------------------------------------------------------------------------------------------------------------------------------------------------------------------------------------------------------------------------------------------------------------------------------------------------------------------------------------------------------------------------------------------------------------------------------------------------------------------------------------------------------------------------------------------------------------------------------------------------------------------------------------------------------------------------------------------------------------------------------------------------------------------------------------------------------------------------------------------------------------------------------------------------------------------------------------------------------------------------------------------------------------------------------------------------------------------------------------------------------------------------------------------------------------------------------------------------------------------------------------------------------------------------------------------------------------------------------------------------------------------------------------------------------------------------------------------------------------------------------------------------------------------------------------------------------------------------------------------------------------------------------------------------------------------------------------------------------------------------------------------------------------------------------------------------------------------------------------------------------------------------------------------------------------------------------------------------------------------------------------------------------------------------------------------------------------------------------------------------------------------------------------------------------------------------------------------------------------------------------------------|
| 4C-increased-1307<br>downregulated-1147<br>0,05 | 62    | <p> <i>TTC37 TEAD1 TIAL1 ASS1 IL6R ASAP2 SUSD6 USP18 TMOD2 YPEL1 WSB1 WDR26<br/> MAG11 GALNT10 ZNF608 BPNT1 KDM7A BBS4 CPEB4 COL6A5 ZFYVE28 GAS2<br/> TP53I11 GNG7 ERO1B RAPGEF2 FNDC3B PFKFB4 MYLK3 NCOA7 AKAP11 TTC33<br/> MAP3K9 MBNL2 DNAH14 ERI1 ARHGEF12 LYPLA1 ZNF397 SEMA3E TMEM273 CFH<br/> INTS8 PAPP A CNN2P12 KSR1 LUC7L TTLL7 TSPAN33 GARNL3 DHTKD1 FLNB PRRC1<br/> PTAR1 LAMB1 GARS1-DT TMEM116 ATF6 PLEKHA8 HLA-B KIF21B CMTM7 </i> </p>                                                                                                                                                                                                                                                                                                                                                                                                                                                                                                                                                                                                                                                                                                                                                                                                                                                                                                                                                                                                                                                                                                                                                                                                                                                                                                                                                                                                                                                                                                                                                                                                                                                                                                                                                                                                |
| 4C-decreased-1200<br>downregulated-1147<br>0,05 | 54    | <p> <i>SPPL2B DIP2A SMYD3 DYSF FRRS1 RNF217 FRA10AC1 UFL1 VSTM4 CTSB NDRG2<br/> HDGFL3 DSTYK IMPA2 APOL1 AIF1L RSPH3 STK10 CCDC162P BMF FLT1 RB1CC1<br/> AMFR DMXL2 CELF2 SYBU SMTN PDE4DIP SCG3 EMILIN2 CELSR2 PTPRJ<br/> SELENON AIG1 PHKB TMEM54 SEC24D EXT2 P2RX6 ADAMTS14 KYNU ITPR2 RXFP1<br/> VPS13D CCND3 PSAP HIVEP2 CYLD CAPN5 DIPK1A COPB1 EGLN3 PTGS1 HIP1 </i> </p>                                                                                                                                                                                                                                                                                                                                                                                                                                                                                                                                                                                                                                                                                                                                                                                                                                                                                                                                                                                                                                                                                                                                                                                                                                                                                                                                                                                                                                                                                                                                                                                                                                                                                                                                                                                                                                                                       |
| 4C-increased-1307                               | 1245  | <p> <i>FSTL1 CD44 PLCE1 SLMAP FAM219A FARP1 KCNMA1 PKNOX2 ARHGAP5-AS1<br/> APBB2 ZNF684 KLHL13 GLT1D1 ABCB7 COX7A2L FYB2 RNF38 AHDC1 LINC02073<br/> CUBN SLC10A7 LDB3 PAK1 SCAF8 SLC6A11 B9D1 CPXM2 RTN1 KIRREL1 LINC01467<br/> PEBP4 PPP1R13B FGR TOP3A EPN2 LINC01491 LINC02664 THRAP3 INIP NSMCE2<br/> ZNF208 RCL1 PRSS51 SLC25A52 OAZ2 ZNF718 DKK2 GLRA4 OR7A17 DHRS11<br/> PCAT19 CCDC34 TAOK3 DNAJC27-AS1 PUM3 ZNF66 LINC02563 SCYGR8 LRUGK<br/> TENM4 TRPM6 FAAHP1 LINC01479 FOXK2 CCDC106 SLC8A1 SMIM35 ANLN<br/> ARHGEF26-AS1 SLC1A7 LGI2 ANKRD6 KCNC1 ADGRE3 GPR55 DNAJC15 Tafa2<br/> STAU2 PGAP4 SIAH3 RIPK4 TMEM63C ZNF257 USP14 ST8SIA4 HYDIN2 ADGRE4P<br/> IGLV3-2 USP7 CD82 KIR2DL4 FAM167B ARL13B SCP2 TMEM156 ABHD2 ALCAM<br/> DENND1A SEC14L1 ERLIN2 ATP11C PDZRN3 SF3B6 LIMD1 ADAM32 RSR1 DNAH11<br/> ZSCAN5C NIPBL CEP120 B3GALT5 CDC42EP3 MICU1 FAM204A SNX25 MYO5C SDC2<br/> OTX2-AS1 ATF1 SLC25A21 SLC22A14 SAMD12-AS1 RBPJP6 C12orf4 TTLL11<br/> LINC01579 NEBL DIDO1 RARB CCDC18 CDH8 AGPS TRPV5 HEPHL1 WDR12 PJA2<br/> KLHL7 TCF4 ECM1P1 GACAT3 RPRD1B AURKA LINC01145 PTPN2 AP3B1 PBLD<br/> GORAB ERICH5 BCAP29 PHACTR1 TTC21B PSMF1 SLC5A4-AS1 SH3PXD2A NEK6<br/> OPA3 SLC39A12 MOB1B OR13C9 UIMC1 SEMA3F-AS1 YIPF6 TMEM25 OSBPL10 RIC3<br/> CASP5 EXOC1 RNF182 RALGPS1 UPP2 PHF21B GUSBP1 ZFPM2 PIEZO2 FAM66A<br/> BCRP2 SVEP1 FANCA DEUP1 ZNF354C LINC02325 LRRC2 ANKRD26 RGS20<br/> MIR3118-2 PDGFD CNDP2 HCRTR1 TLK1 CREBBP RELL1 LINC02176 BRINP3<br/> LINC01237 KIF4A XRCC4 OVCH2 FAM193A COP1P1 EPHA7 MAP7 TM9SF4 SENP8<br/> NSG2 ZBTB80S MIR17HG GRIA1 ZNF627 IFNAR1 KIAA0319L USH2A LHFPL6 OPN3<br/> NEGR1 NAV2 XXYL1 CACNG2 ANO10 BTBD9 SPATA48 CA5A FAM72D NET1 TTC28-<br/> AS1 BMP2 TOX KIAA0232 LINC02011 SRGAP2C SLC44A5 FAM107B LUZP2 BTBD10<br/> SH2D3C MELK RBPJP2 LRIG1 PRKACB ZNF536 RIMS1 GXYLT2 HIPK3 EPB41L3<br/> TMEM225 POR LINC00896 PARVB MORC1 OR10H2 ZBTB7C SCGB1D5P KANK4 GAST<br/> SGO1 SAR1A SLC37A1 SUPT16H BCL11B LINC01814 DTWD2 LINC01213 NELL2<br/> TSPAN2 NIPA2 SLC14A2 LINC02668 OR52B3P ASAH2B RALB MOSMO KRTAP19-10P<br/> BLK PPP1R17 PIAS1 PTCSC3 LRRFIP1 LINC02180 CTDPI SSBP2 ZNF705CP FHIP2A<br/> CFAP74 ZNF846 HAGLR ZNF287 ARMC2 FER1L6 ALS2 CYTH4 COMMD8 PTGER4P2 </i> </p> |

|  |                                                                                                                                                                                                                                                                                                                                                                                                                                                                                                                                                                                                                                                                                                                                                                                                                                                                                                                                                                                                                                                                                                                                                                                                                                                                                                                                                                                                                                                                                                                                                                                                                                                                                                                                                                                                                                                                                                                                                                                                                                                                                                                                                                                                                                                                                                                                                                                                                                                                                                                                                                                                                                                                                                                                                                                                                                                                                                                                                                                                                                                                                                                                                                                                                                                                                                                                                                                                                                                                                                                                                                                                                                                                                                                                                                                                                                                                                                                                                                                                                                                                                                                                                                                                                                                                                                                                                                                                                                                                                                                                                                                                                                                                                                               |
|--|---------------------------------------------------------------------------------------------------------------------------------------------------------------------------------------------------------------------------------------------------------------------------------------------------------------------------------------------------------------------------------------------------------------------------------------------------------------------------------------------------------------------------------------------------------------------------------------------------------------------------------------------------------------------------------------------------------------------------------------------------------------------------------------------------------------------------------------------------------------------------------------------------------------------------------------------------------------------------------------------------------------------------------------------------------------------------------------------------------------------------------------------------------------------------------------------------------------------------------------------------------------------------------------------------------------------------------------------------------------------------------------------------------------------------------------------------------------------------------------------------------------------------------------------------------------------------------------------------------------------------------------------------------------------------------------------------------------------------------------------------------------------------------------------------------------------------------------------------------------------------------------------------------------------------------------------------------------------------------------------------------------------------------------------------------------------------------------------------------------------------------------------------------------------------------------------------------------------------------------------------------------------------------------------------------------------------------------------------------------------------------------------------------------------------------------------------------------------------------------------------------------------------------------------------------------------------------------------------------------------------------------------------------------------------------------------------------------------------------------------------------------------------------------------------------------------------------------------------------------------------------------------------------------------------------------------------------------------------------------------------------------------------------------------------------------------------------------------------------------------------------------------------------------------------------------------------------------------------------------------------------------------------------------------------------------------------------------------------------------------------------------------------------------------------------------------------------------------------------------------------------------------------------------------------------------------------------------------------------------------------------------------------------------------------------------------------------------------------------------------------------------------------------------------------------------------------------------------------------------------------------------------------------------------------------------------------------------------------------------------------------------------------------------------------------------------------------------------------------------------------------------------------------------------------------------------------------------------------------------------------------------------------------------------------------------------------------------------------------------------------------------------------------------------------------------------------------------------------------------------------------------------------------------------------------------------------------------------------------------------------------------------------------------------------------------------------------------|
|  | <p> TBATA ATL1 SERPINB11 ZDHHC17 KCNH1 ABCC9 SNAP29 QSOX2 GSG1L MCF2L<br/> LINC01098 ACSS3 BBOX1-AS1 ABCD3 DCDC1 NPAS2 DIAPH3 CCSER2 INTS7 AMPH<br/> ASB4 TMEM178B COL5A3 COL4A2 PARP15 ME2 GRAMD1B SIAH2 POLR3A ZNF44<br/> LINC00536 HEATR5A ADA2 PRKCZ F13A1 ALG10B CDC14B GIPC2 RNU6-1007P<br/> HECTD1 CYP4F22 ABCA10 LINC01182 KLHL1 SP110 LINC01566 PRSS2 MRM1<br/> ZNF705D ATP9A POSTN BIRC6 OLFM4 SAMHD1 OCLN AK8 SDF4 ITGBL1 TNFSF11<br/> SPOP EFHD2 EGFR MYEOV ADAM28 MRPL13 B4GALNT3 AFAP1 DPY19L2P1<br/> SH3BP5 SLC49A4 FANCM NEO1 MELTF MXRA7 MYT1L SRGAP2B SLC37A2 ATP1A1-<br/> AS1 SORCS3 PDP2 VPS37A LRRC49 ERP27 ZNRF3 ZBTB21 TENM3 ITPKB ENPEP<br/> TUSC3 IPCEF1 RTRAF NF1P9 OR4K6P BIN2 LINC00877 TCERG1 PHACTR2 UBE2O<br/> VENTX DIRC3 PLCZ1 NCOR1 LINC02213 PRDM10 EBF2 DNAJC21 C16orf72 USP33<br/> ERBIN RNY4 SLC24A4 ZNF573 MBTPS2 KHDC4 C2 NTF3 OR6C75 ZNF705G<br/> LINC01684 PI4K2B USP41 RBMX2 FAM72A IL17RA SOX1-OT SUS4 PTH GALNT14<br/> RAB22A H2ACPI FAM66C ZNF160 LINC00466 HADHB NSMCE1 DNAH10 PDE10A<br/> CACNB2 REPS1 MAP3K4 PDXDC1 MTPN MT1HL1 LINC02646 INTS13 VSTM2A<br/> RUNX2 DDX10 ZNF804B LRP12 LRRC8B CSNK1G1 ZNF169 MICU2 SOX6 JAZF1-AS1<br/> SGCD RC3H2 LINC01492 RNU6-374P TNNI1 RAC1P3 SP3 STK32B PLG ZNF106<br/> LINC01020 NR2C1 SLFN11 ADAMTS3 DNAH8 NHS LINC02505 CABYR LINC01476<br/> ANK3-DT CLSPN RGS12 PPP6R3 ZNF438 GUCD1 PPIP5K2 GTF21 NCK1 SOHLH1<br/> LINC01192 CDV3P1 C15orf32 PUDP KDM1B SSPN HS3ST2 F5 PATJ FAT1 NUP50-DT<br/> CPS1 MESD PRKCH EBNA1BP2 TRAK1 TET1 FAM66B RHPN2 ANKRD30A RABGAP1L<br/> KRT25 NMU DENND2B LINC00603 SNX8 HADHA CFDP1 LINC00944 SMARCA1<br/> MIR3118-3 ADAMTS9-AS2 ASTN1 GNG12-AS1 GFRA1 NSG1 RMST ANKRD20A8P<br/> MAPKBPI CPE TDRD7 RNF8 LY86-AS1 LINC02613 NSMAF PYGO1 LINC01723<br/> NFKBIA TEX29 DNAL1 TRAPPC3 CD101 TMEM132D GSE1 HMCN2 FHIP1A EFCAB8<br/> LINC01204 SPRED2 SCN10A HSDL2 ANKRD18A ZNF350-AS1 CEP128 ZC3H15<br/> LINC01135 ANKRD7 ABCA5 PTCSC2 CIB4 ABCC8 TTLL5 NOXR21 TMTCT1 MOCS2<br/> NRK NAT1 KICS2 CYBRD1 MCPH1 MINAR1 EIPR1 STON1-GTF2A1L BMP2K<br/> LINC02543 CYFIP2 APOOP5 CCDC126 BABAM2 MSANTD4 CRB1 ILIR1 OTOG<br/> HEPACAM USP8 NUDT21 XPO7 ARSJ KCNS3 ENPP3 ZNF235 ERC1 LINC02006<br/> VWA3B ZNF850 ALPL PDLIM5 ABLIM1 XYLT1 BTA1 PDCCD6IPP2 ALPK2 LINC02660<br/> ABCA13 HNRNPCP9 RFX2 MAPK8IP1 ADGRB1 SLC66A1L LYPLAL1-DT ADGRE1<br/> UCK2 RAP1GDS1 FOXO1B TET1P1 ST8SIA5 TBC1D19 RPTOR ZNRF2P2 STT3A<br/> PDE6A CHST8 BID COX5A MACF1 MDFIC MNAT1 PCMTD2 STARD4-AS1 TC2N<br/> TUBGCP3 BTLA LGALS9DP SLC15A5 ECHDC1 HCP5 AMBRA1 CLEC20A NETO2<br/> DOCK2 SERPINA6 ASCL3 PTPRE IFT46 FAM66D NUP210L LINC02063 TSPAN3<br/> ALPK3 LINC02465 FLVCR1 SLC9A5 MUSK EPDR1 MYO3B LMNTD1 RAB8B<br/> LINC00583 MYOM1 ZSCAN30 MTCO2P3 LINC00469 RNU6-835P RXRA CGAS<br/> ARHGEF7 SLC23A2 LIN54 LINC01649 ARPP21 ACACA ARL11 MAMLI6<br/> ADAM5 TRIM43B ZNF879 MAN2A2 LNPEP DDX39BP1 LINC02198 UNC93B3 RPS3AP6<br/> CDK12 POU1F1 KIAA1958 CARD18 LINC00623 NEDD4 RFTN1 CCDC141 NEK4<br/> RSU1P1 PEX14 CFAP61 FYCO1 LPGAT1 CNTN4 FOLH1 HRH4 SPRR2D LRRC38<br/> EXOC6B EVC2 AFG3L2 CNKSR3 USP49 DRAXIN CSF1 CEACAM22P LINC02109<br/> LINC00511 SLC8A3 TRNAU1AP LINC02145 RNF17 HAS2-AS1 KIF11 LINC02400<br/> SLC2A3 FAM72B PRAMEF26 SLC40A1 PHC3 STOML1 CADM2 SDR42E1 LINC01581<br/> FANCL SH3GLB1 GABRR2 RAP1GAP PIK3C3 OTULINL RAD9A SLC9C1 SCML2<br/> SPOPL MAGI3 LINC00701 TRAF3 MPPED1 CCDC122 CHD6 FAM135B MORN1<br/> CCDC186 PAXIP1-AS2 LINC01695 PTPRB LINC01412 ITGA1 VN1R7P MARCHF6<br/> CCNG2 ATG4B CIBAR1 ODR4 GAGE13 TANC1 CORO2B DHX40 KIFC1 POC5 IGHVII-<br/> 65-1 TRPC7 SYCP1 VPS41 DTX1 MYO10 GF11B ZNF407 MIR3118-4 ASB3 TENM3-AS1<br/> KIR3DL2 GAGE12J TRIM43 FOXO6 TSHZ2 C1orf21 TOM1L2 STOX2 FAR2 BICRAL<br/> PLAGL1 NEK7 NKG7 NLRP13 COG2 CCDC138 MTOR RPL5P35 ERN2 CYP2C58P<br/> TLNRD1 SERPINB2 AOX3P LINC01322 GABRB1 ANKS1B RP1 AKAP10 EFCAB14<br/> SLC16A9 WWC1 PLEKHA3 RSRP1 BLM PLA2G4A SENP6 LARP1 GATAD1 ZBTB16<br/> PSMB2 DDX39AP1 UNK B4GALT6 ATG5 LINC01938 SGTB TRIM60P19 ZNF875 XKR5<br/> SCGN SYNJ2 STK32A ARSB IL34 ZNF234 CLVS2 DIO2-AS1 SIGLEC29P DPYSL5<br/> CWC27 AGK USP25 ANKRD11 ASCC2 SLC44A1 CNM4 ADAM10 ATXN3 SPEN GALT<br/> NAP1L4 MRPS22 TMC1 PLD5 OXR1 PAK3 CAMLG KANSL1 RNU6-1150P NP1PA1<br/> TPM1 CES1P2 CIDEA EBF1 CRIM1 OB11-AS1 OR2T2 MADD PCID2 LINC00667<br/> NDFIP2 DUX4L45 ZSWIM6 MYL1 ANKRD36BP2 MTREX CAMK1G DSG1 C1orf87<br/> LINC02327 FAM30A PDZPH1P ERICH3 TRERF1 CENPBD1P1 GID8 TADA2A RPL15P2<br/> LRRC9 LINC00158 FBN1 NIPAL2 MTUS1 GABRA6 PTPRVP DHRS3 PANTR1 LASP1<br/> VPS35L ABHD17C KRT6A C21orf91-OT1 GGT4P DROSHA ZNF813 ANKRD31 PALS2<br/> ADCY10 FAM149B1 PDE1A TMPRSS2 LINC02165 PRICKLE2 CMAHP ANGPT1 TRIM58 </p> |
|--|---------------------------------------------------------------------------------------------------------------------------------------------------------------------------------------------------------------------------------------------------------------------------------------------------------------------------------------------------------------------------------------------------------------------------------------------------------------------------------------------------------------------------------------------------------------------------------------------------------------------------------------------------------------------------------------------------------------------------------------------------------------------------------------------------------------------------------------------------------------------------------------------------------------------------------------------------------------------------------------------------------------------------------------------------------------------------------------------------------------------------------------------------------------------------------------------------------------------------------------------------------------------------------------------------------------------------------------------------------------------------------------------------------------------------------------------------------------------------------------------------------------------------------------------------------------------------------------------------------------------------------------------------------------------------------------------------------------------------------------------------------------------------------------------------------------------------------------------------------------------------------------------------------------------------------------------------------------------------------------------------------------------------------------------------------------------------------------------------------------------------------------------------------------------------------------------------------------------------------------------------------------------------------------------------------------------------------------------------------------------------------------------------------------------------------------------------------------------------------------------------------------------------------------------------------------------------------------------------------------------------------------------------------------------------------------------------------------------------------------------------------------------------------------------------------------------------------------------------------------------------------------------------------------------------------------------------------------------------------------------------------------------------------------------------------------------------------------------------------------------------------------------------------------------------------------------------------------------------------------------------------------------------------------------------------------------------------------------------------------------------------------------------------------------------------------------------------------------------------------------------------------------------------------------------------------------------------------------------------------------------------------------------------------------------------------------------------------------------------------------------------------------------------------------------------------------------------------------------------------------------------------------------------------------------------------------------------------------------------------------------------------------------------------------------------------------------------------------------------------------------------------------------------------------------------------------------------------------------------------------------------------------------------------------------------------------------------------------------------------------------------------------------------------------------------------------------------------------------------------------------------------------------------------------------------------------------------------------------------------------------------------------------------------------------------------------------------------|

|                   |      |                                                                                                                                                                                                                                                                                                                                                                                                                                                                                                                                                                                                                                                                                                                                                                                                                                                                                                                                                                                                                                                                                                                                                                                                                                                                                                                                                                                                                                                                                                                                                                                                                                                                                                                                                                                                                                                                                                                                                                                                                                                                                                                                                                                                                                                                                                                                                                                                                                                                                                                                  |
|-------------------|------|----------------------------------------------------------------------------------------------------------------------------------------------------------------------------------------------------------------------------------------------------------------------------------------------------------------------------------------------------------------------------------------------------------------------------------------------------------------------------------------------------------------------------------------------------------------------------------------------------------------------------------------------------------------------------------------------------------------------------------------------------------------------------------------------------------------------------------------------------------------------------------------------------------------------------------------------------------------------------------------------------------------------------------------------------------------------------------------------------------------------------------------------------------------------------------------------------------------------------------------------------------------------------------------------------------------------------------------------------------------------------------------------------------------------------------------------------------------------------------------------------------------------------------------------------------------------------------------------------------------------------------------------------------------------------------------------------------------------------------------------------------------------------------------------------------------------------------------------------------------------------------------------------------------------------------------------------------------------------------------------------------------------------------------------------------------------------------------------------------------------------------------------------------------------------------------------------------------------------------------------------------------------------------------------------------------------------------------------------------------------------------------------------------------------------------------------------------------------------------------------------------------------------------|
|                   |      | <p> <i>HMGA2 HHAT KLHL32 CHASERR PSTPIP2 LINC00861 MVB12B C4orf50 LINC02253 UBASH3A CACNA2D3 SEL1L ELOC CUL1 SLC7A2 TMEM67 BTF3L4 MIR3936HG ZNF618 ITGA4 CPA6 AGO1 NSUN2 PRKCE DEFA3 GLYATL1 RBPJP5 PTPRK MIR3142HG CNTN3 GLIS1 ODAD2 ARHGAP31 RXRG ETNPPL KIR2DS4 PRKAA2 CD163 ARMC3 BBS2 SYT1 LINC01128 GRB10 OR4F15 LATS2 IKZF2 PPP1R12B APCDD1L-DT PDE2A DNMT3L ASPM RFC2 PPARA PLXNA2 KLHL33 DENND2C LINC01602 TBC1D13 CDYL2 SCARA5 PRG4 SCGB1D1 MLLT1 RANBP3L MARK2P12 TG ADGRB3 HGD SLC36A1 PLCB1 UBE2R2 KCNH8 ATP6V0CP3 SDCBP ANKRD19P RPS10P7 CUL5 HOMER2 DGKI RIN3 LINC01221 REG4 LINC01151 DIP2B CD5L LINC01524 TBC1D30 IGLV2-14 NME7 STXBP6 TFDPI FAM66E ZBTB33 MXII ZNF876P PPME1 TRAPPC8 OR4R3P MBNL1 STX12 ABI1 LINC02291 FUT9 MOK CREG1 LINC02488 SLC12A1 SCN2A MAPKAPK5P1 WNT7A TUBB6 ZNF449 DOCK10 FAM27C MED1 PAMR1 DDX6 HNRNPM SPIRE1 TMEM71 COG5 AIMP1 UBE2E1 ARAP2 LDB2 LINC02149 SNX30 ATP8A1 BCL2L1 IQSEC1 LINC02008 JARID2 LINC02236 SHROOM3 ADK PRR5L ALX4 CORIN MACROH2A1 FAM241A LINC00838 RANBP17 WNT2B MRPS27 PPM1L CPHL1P LRRC37A3 TRIM43CP PRPF18 SMOC1 GSTA3 EXD3 SETDB2 FAH MON2 OR51E1 TOGARAM1 SLC45A4 ZNF705B ELF2 SEMA3D LDLRAD3 GLYAT KIF15 JPT2 CFTR VSX1 TBX20 FLRT2 NFATC2 MSH2 NALCN-AS1 PRAMEF25 KRTAP20-4 ARHGAP44 MTMR2 ZNF970P KCNH5 FAM189A2 BAZ1A CADM1 KLHL29 PTPRO ARID3B OPRM1 ACER2 ZDHHC14 RGS9 YLPM1 ITFG1 IPO11 VCL SLC13A5 GLB1L3 ABCA9-AS1 DOCK5 VCAM1 C7orf31 LINC02511 LINC01818 ATP6V1C2 EWSR1 MAGEL2 IFT81 NLSL1 OSCP1 SGO1-AS1 DTHD1 SRGAP3 IGHV8-13-1 HAAO CTNNAL1 CIBAR1-DT CYP2A7P1 ATP6V0D2 SYNJ1 PHF20L1 KLF15 PPP2R2B NEDD9 HDHD5 IL12A-AS1 ANKRD66 ENPP1 SDR42E2 LYRM4 CCDC150 DNMT1P47 LINC02099 HEMGN RIMS2 UGP2 RP1L1 PPM1F OR4K8P EFCAB6-AS1 CHSY3 YBX3 YAP1 ARL15 ANK3 BMPR1B LINC01173 FCRLA LINC01937 SEMA5A C1orf127 PRDM15 KITLG KRT6B SV2C ELL2 DAW1 COL5A1 IGHV3-74 IFT57 LINC01426 RIPOR2 MAP4K4 LINC02899 ZNF112 FICD FEZ2 ATE1 PEG10 INHBA-AS1 PRAME HSPD1P3 NUP43 NMD3 OLA1 GATAD2B VPS13C ANKRD55 XIRP2 KRT85 SLC14A1 CA1 C5orf52 FAM72C MFSD9 EOGT SERPINI2 STK38 APBB1IP NPL CAST TBC1D9 FBXO32 AOA4 SNHG14 TSBP1-AS1 SMG1P4 SNAI2 ZBTB49 ANP32B FAM90A28P PHF2P2 AP4E1 DLEU1 NDFIP1 TNFR FAM180A LHX9 LINC02074 OCA2 ST8SIA6 DAPK1 MSANTD2 FCHO2 RFTN2 TRAV8-6 COL6A6 RN7SL767P DNAH5 CNTN6 CLIC6 LINC02406 FMN2 BHLHE40-AS1 SEMA3C VAV1 LINC00895 CACNA1I BTG3 DPY19L1 CSF2RB RPS6KA3 SMAD5 DNAJC13 BCKDHB PPIL6 IGLV3-30 CNST PATL1 UBE2J2 ASB2 OTOX1 PSME3IP1 OR4F6 GHRH UGT3A2 GOLGA8B RNLS IGLV4-3 SPOCK1 LINC02315 NF1P6</i> </p> |
| 4C-decreased-1200 | 1146 | <p> <i>LRRC37A5P CCDC116 ZHX3 APOL2 RPS4XP6 PDCL3 PTPRR HERPUD2 CRTAM SLC52A1 UBE2G1 PELI2 TPI1P1 NOS2 IGF2BP3 MIR548H4 ZEB1 LINC01708 FAT4 PARN SEMA4D SLC15A2 MRPL45 RN7SL483P WSCD1 MIR4435-2HG KNDC1 LINC02355 ZFYVE1 EVC HERC2P2 LINC00670 DMC1 CXADR C9orf43 NBPF21P OR7E19P RIOK1 HERC2 GGT2 UNC45B LUZP1 LINC01346 BVES-AS1 ZNF723 LINC01138 CECR2 LINC01782 GNAS NPM1P2 CD38 SERPINB9 LINC01876 PGBD5 LAIR1 MSH6 RASGRF1 HECTD2 FBXO31 C12orf40 LINC01163 GMPR RIN2 PRDM16 PDE6C TRAPPC9 LINC00323 MEIS2 CARMIL1 PCDH7 BCL2 KL LRRC4C LINC02558 RACGAP1 MIR3667HG THADA NUP37 PPP1R9A SAA3P TMEM117 KCNK15-AS1 TOX3 TDRD5 TASP1 SNX6 POTE1 GOLGA6L3 SAMM50 ZZEF1 HHLA2 NCF4-AS1 C3orf52 SLAMF1 UQCC1 RGL1 ATP5PBP3 SHOC1 LINC00841 FAAP24 INO80D KDM6A MED27 NCAM1 PDYN-AS1 GDAP1L1 LINC02096 LINC01358 EPHA4 LINC01967 PLA2R1 LYSMD2 NGDN H1-9P ADAMTS2 GTSF1L WARS2-AS1 CCDC172 FRYL LINC01828 GPRC5C COLCA1 CPAMD8 RNU6-929P GPR1-AS UBL7 ARMC6 LINC02675 ASH1L CALM1P2 RBM6 MEGF10 IGHV2-70D HS1BP3 LIPI LINC01445 GOT2 RAB38 DZANK1 CLTCL1 NUA1 PCAT1 KCNK10 ZNF738 BLOC1S5-TXNDC5 BRD4 SLC16A1-AS1 VMP1 CHAF1A NENF HRH2 ATP6AP1L RNU2-47P RDX SNTG2 SVIL APBA2 TTC3 CHAMP1 COL23A1 NSD1 NEDD4L EDAR C5 EGF LINC00960 ATP2B2 RPL37P3 CCNYL3 AGO2 ABCC12 PARK7 RIMBP2 ZNF271P IFT43 ADAMTS19-AS1 SNRPC C2orf69P4 DRC7 DSE POTE1 LINC01427 MYCL LINC02256 TPTE2 SPAG6 BMP7 PDE4DIPP1 GALNT2 KIAA0753 FGF12 ANKRD17 EPHX4 CYP2C9 CNOT7 CASC9 IMPACT ITGA6 HHIPL1 NOTCH2 ZFP90 S100B ARHGAP12 USP43 KCNN3 FKBP5 NFAT5 FLI1 ANAPC1 GRM1 IBA57 LINC02147 ARHGAP26 ITGB8 GAP43 LINC02422 OR4K3 PRDM13 PDE3A PTPN4 BCAR3 MAP6 SREBF2 CDH11 SETBP1 CDS2 ZNF780B LINC01900 ATP6V1E1 LINC01993 LMX1A AGBL1 DEFT1P2 LINC02439 ZFAND6 GBP4 CNKSR2 PSMA5 RESF1 MAPK11P1L DPH6-DT GFRA2 NEK10 ADCYAP1R1 SNX29 MAGI2-AS3 ZNF611 STAT1 SAMD5 ZC3H14</i> </p>                                                                                                                                                                                                                                                                                                                                                                                                                                                                                                                                                                                                                                                                       |

|  |                                                                                                                                                                                                                                                                                                                                                                                                                                                                                                                                                                                                                                                                                                                                                                                                                                                                                                                                                                                                                                                                                                                                                                                                                                                                                                                                                                                                                                                                                                                                                                                                                                                                                                                                                                                                                                                                                                                                                                                                                                                                                                                                                                                                                                                                                                                                                                                                                                                                                                                                                                                                                                                                                                                                                                                                                                                                                                                                                                                                                                                                                                                                                                                                                                                                                                                                                                                                                                                                                                                                                                                                                                                                                                                                                                                                                                                                                                                                                                                                                                                                                                                                                                                                                                                                                                                                                                                                                                                                                                                                                                                                                                                                                                                                                                                  |
|--|----------------------------------------------------------------------------------------------------------------------------------------------------------------------------------------------------------------------------------------------------------------------------------------------------------------------------------------------------------------------------------------------------------------------------------------------------------------------------------------------------------------------------------------------------------------------------------------------------------------------------------------------------------------------------------------------------------------------------------------------------------------------------------------------------------------------------------------------------------------------------------------------------------------------------------------------------------------------------------------------------------------------------------------------------------------------------------------------------------------------------------------------------------------------------------------------------------------------------------------------------------------------------------------------------------------------------------------------------------------------------------------------------------------------------------------------------------------------------------------------------------------------------------------------------------------------------------------------------------------------------------------------------------------------------------------------------------------------------------------------------------------------------------------------------------------------------------------------------------------------------------------------------------------------------------------------------------------------------------------------------------------------------------------------------------------------------------------------------------------------------------------------------------------------------------------------------------------------------------------------------------------------------------------------------------------------------------------------------------------------------------------------------------------------------------------------------------------------------------------------------------------------------------------------------------------------------------------------------------------------------------------------------------------------------------------------------------------------------------------------------------------------------------------------------------------------------------------------------------------------------------------------------------------------------------------------------------------------------------------------------------------------------------------------------------------------------------------------------------------------------------------------------------------------------------------------------------------------------------------------------------------------------------------------------------------------------------------------------------------------------------------------------------------------------------------------------------------------------------------------------------------------------------------------------------------------------------------------------------------------------------------------------------------------------------------------------------------------------------------------------------------------------------------------------------------------------------------------------------------------------------------------------------------------------------------------------------------------------------------------------------------------------------------------------------------------------------------------------------------------------------------------------------------------------------------------------------------------------------------------------------------------------------------------------------------------------------------------------------------------------------------------------------------------------------------------------------------------------------------------------------------------------------------------------------------------------------------------------------------------------------------------------------------------------------------------------------------------------------------------------------------------------------|
|  | <p> MROH5 SLC44A3-AS1 MYOCD CREM GOLGA8J XKR3 UBE2QL1 PLPPR5 TDP1 AVL9<br/> EFEMP1 TNRC6B WBP2P1 ZNF33B LINC02542 SYN2 PTC2D MYO1E SMOC2 MIPPEP<br/> NCSTNP1 HDAC2-AS2 HLCS FH RWDD2B PLPP4 PWRN4 CCDC102B SDS GSR<br/> LINC01571 FIG4 SOGA1 ARHGAP32 NECTIN1 ZNF528 LINC01222 LALBA NXN<br/> LINC00375 FOXJ3 CENPE CKMT1B MYL12B RSPH14 IL17RD BRCA2 ANKMY1 HCG22<br/> APELA UBN1 SSBP3 PLA2G12B FAM83B HDAC4 CTNNA1 STK36 GNAI2P1 FAM102A<br/> NCOR1P1 TRPC5 MYO9A TMEM182 IL10 LINC02305 LCLAT1 LIFR-AS1 C19orf18 FTO<br/> SLC6A1 EPC2 SEM1 SEMA6A-AS2 MOGAT3 MS4A4A TMEM236 NLK THSD7A CXCL2<br/> GOLGA6B LINC00334 CARD10 ACSBG1 GCSAML DNPEP TRAPPC11 HOXC4 IGHV3-<br/> 62 NECTIN4 CNMD LINC01309 UFD1 SMARCA4 LINC00299 BAZ2B HERC2P3 CRACD<br/> NGF-AS1 AGL PALMD HS6ST1 MARK2 MEOX2 SF11 ZBED9 CTSE ATF2 PLEKHB2<br/> FAIM ZNF72P RPRD1A ZNF880 PPP2R2A ESS2 PHAF1 ZNF541 RBBP8 AK6P2<br/> CKMT1A RFC1 NSUN6 LINC02174 CDC45 MC2R AKR1B1 BTBD11 CWC22 LRP2<br/> LINC02087 ZNF121 HERC2P9 SYNE1 MTHFD1L RALGPS2 HOATZ SNRK ABCD1P4<br/> EXTL3 EHMT1 TTC29 FBXO47 KRT89P ZNF735 ZBTB10 PKHD1L1 SLC9B1P4 PLPPR1<br/> CEP192 SLC26A2 CAMK4 GUSBP11 CLPX OR7H1P ROCR ANKRD20A9P HDAC11<br/> SLC9A4 DHX29 ANKRD20A17P GRIK3 GRXCR1 NUMB STPG2 MIDEAS TM9SF2 CD70<br/> SH2D1B ZNF606 ESYT2 HEATR6 ARFGAP3 MAPRE2 FGF10 TAPT1-AS1 KRT18P59 ISX<br/> RAD51AP1 POTEM LINC01035 ESRP1 RIC8B TAF3 ZMYM4 TPTE FRG1JP MED12L<br/> GRM7 ZDHHC21 BRMS1L TM9SF3 DDHD1 ICA1 PLEKHD1 CDH7 TLDC2 CYCSP39<br/> HORMAD2-AS1 VASP PLGRKT UBE2E2 UNC80 SDE2 PTGFRN PPA2 ILDR2 IMMP2L<br/> ZNF615 SPSB4 SPSB1 GABRG2 ZNF567 ITCH NUDCD3 MBP S100BP TANGO6<br/> GABRA5 CDKN2C CFAP97 STXBP1 SLC46A3 DLC1 ANKRD33B PNPLA7 RPS3AP4<br/> CNIH1 FRG1BP C2orf69P3 LINC00114 ZIM3 MANBA DUX4L2 CHRM3 ECT2L UST<br/> MIR663AHG CALD1 LINC01543 ERICH1 DEDD2 TYW1 TAF15 ALB ARHGAP24 JPH1<br/> ANKRD20A3P EFR3A HTR2A UBAP2 TPH2 N4BP2L1 IGHV10R15-9 TPTE2P6 EIF4BP3<br/> LOXHD1 APC MDS2 GOLGA8G LINC01622 GALNT1 MARCF1 OR4L1 ZBTB25 INO80<br/> RBM15-AS1 HSD17B14 KRT16P6 COL27A1 GLP2R CHCHD2 BMP5 SLC4A4 ZNF675<br/> LINC02366 GOLGA6L17P SYT16 CRYBG1 TWIST1 HACD2 LINC02653 LINC02061<br/> GEMIN5 RPL15P3 TRIM77BP KTN1 ERCC6L2 PASK RUFY2 SLC16A1 RANBP9<br/> FAM245A MRTFB LINC01344 KCNE4 TRIM5 LINC02228 KRTAP21-3 LINC01801<br/> LINC01320 LYPLAL1 THNSL2 BRWD1 COLQ PPIP5K1 C9 TMTC2 HECW1 HMGB1<br/> MEF2C MCTP1 RNU1-51P MOB3B ACTR3C LCE1F ARPC3P2 MAP4 TSPAN11<br/> MTND1P17 HIVEP1 ATRX TNIK KRT18P55 OR1L6 NBN PRTG OR2T7 SLC17A1 RGMB<br/> KMT2E WNK2 FRMD3 SETD2 RBFOX3 MRPS35 SDAD1P2 PWWP3A ITIH5 UTP4<br/> PACSIN2 TRGJ1 HOXC13 PKP1 SMARCC1 SYNE2 GTF2IP6 MIR181A1HG TRMT61B<br/> NUP214 TRIM23 FABP7 SDCCAG8 GK LINC00355 DUSP22 KCNJ18 ECPAS CHSY1<br/> RFC3 MAB21L3 SFPQ SMPD4 URB1 PTPN12 GPR137B ZYG11A LINC00434<br/> LINC02424 TOP3B MPPE1 STAG2 RGS3 UBA6-DT ANKRD26P1 CMIP DEFB116<br/> SLC2A13 FBN2 YTHDF3 SPATA17 SYT10 ZBTB38 PAFAH1B1 LINC02380 CYFIP1 ALK<br/> DOCK8 GON4L GREB1 ARNT LINC01340 LINC00929 CSTF3 ZNF648 LINC02058<br/> SAMD13 DNAH6 ARFGEF3 TMCO5A UHRF2 EPCAM-DT CSDE1 DLC1 DEFT1P<br/> RNF215 ANKRD28 GRK3 ZBTB2 SND1 IFNG-AS1 SNAP25-AS1 ZFAND4 LINC01664<br/> FGD4 EFTUD2 NRIP1 ETS2 LINC00649 ZNF382 NDUFAF6 GOLGA6D ERMP1<br/> CATSPERG ARL4C ITS2 LINC01917 KTN1-AS1 HIRA OSER1-DT SERPINB7 ANKS6<br/> TMEM74 PRKAA1 RASGEF1C TAF4A ALDH1A2 GABRG1 MTTP POGK CROT MAPK9<br/> ESRRG FBXW2 STON2 LINC02458 LINC02652 LINC01229 FOXJ2 AGAP9 ABCC4 MYT1<br/> FRG1HP ABCD2 DNAJC7 ZNF595 EMP1 TMEM171 ZC3HAV1 LNCAROD RRAS2 SV2B<br/> FAM110A NRBP1 SEC14L3 STK38L GTF2F2 RALGAPA2 FAM245B ADAMTS19 ZNF236<br/> RAB27B SOX30 LINC01337 MYOF CPSF3 PLS1 UNC79 RSPH1 SPON1 ANK2 SH3GL3<br/> CFHR4 INVS FHL2 SNRPD1 NCAPG2 LPCAT2 SUMO3 LNP1 BZW1 PCNA TPTE2P5<br/> PHF19 ZNF518A LINC02191 IGLV3-31 DCAF1 ZCCHC7 CD2AP TTC39C LINC2680<br/> ZNF124 EBF3 TAF4A5 NFKBID SPRED1 MYO5A CIDEA LINC01924 PPP2R2C PWRN1<br/> LINGO1 LINC01706 SEPTIN9 SMPDL3A LRFN2 ACO1 WDFY4 SCAI PAPP2 LTN1<br/> TINAG NCOR1P3 DIRAS2 AQR ABCB5 HEATR4 SLC5A9 KLHL4 DPY19L2 MDM1<br/> RRBP1 SMPX OVOL2 CD9 MTMR10 EIF3F CDHR3 CSE1L NEK2P2 TOM1 FAM118A<br/> PRUNE2 SGMS1 ANKRD24 COL25A1 RBPMS2 CYP4A11 BRINP1 IGLV2-34 MTND2P8<br/> RPL23AP7 GRB14 LARP6 IGSF5 LONP2 CCDC192 LEMD3 PEX6 CHKA BUB1 RNF138<br/> INTS4P1 KRTAP21-2 ZNF292 SPIN1 TBX15 PRB3 TTC3P1 KPNA1 SKA1 LAMC1 SRP9<br/> SCGB2B2 GABPA SMIM11B DSG1-AS1 PCNX1 DUXAP10 LINC02091 NAA35 ATP5PF<br/> RPF2 UBAP1L ZCCHC14 MX2 AGGF1P10 MTCO1P1 ITGB3BP ZNF831 PRAMEF2<br/> ENTPD5 DGKK SLC4A10 LINC00844 TSSC2 LIX1-AS1 TGM1 AGAP14P MGAM FTL1P3<br/> ZDHHC18 LINC01310 PSG9 FAM183A UHRF1BP1L ILIRAPL2 AP1P MUC19 SCAPER<br/> ADSS2 IKBIP NPHP4 LINC02141 OR8B9P CBLIF ATP6V1B2 KCNJ1 LRR1M4 CLCA4 </p> |
|--|----------------------------------------------------------------------------------------------------------------------------------------------------------------------------------------------------------------------------------------------------------------------------------------------------------------------------------------------------------------------------------------------------------------------------------------------------------------------------------------------------------------------------------------------------------------------------------------------------------------------------------------------------------------------------------------------------------------------------------------------------------------------------------------------------------------------------------------------------------------------------------------------------------------------------------------------------------------------------------------------------------------------------------------------------------------------------------------------------------------------------------------------------------------------------------------------------------------------------------------------------------------------------------------------------------------------------------------------------------------------------------------------------------------------------------------------------------------------------------------------------------------------------------------------------------------------------------------------------------------------------------------------------------------------------------------------------------------------------------------------------------------------------------------------------------------------------------------------------------------------------------------------------------------------------------------------------------------------------------------------------------------------------------------------------------------------------------------------------------------------------------------------------------------------------------------------------------------------------------------------------------------------------------------------------------------------------------------------------------------------------------------------------------------------------------------------------------------------------------------------------------------------------------------------------------------------------------------------------------------------------------------------------------------------------------------------------------------------------------------------------------------------------------------------------------------------------------------------------------------------------------------------------------------------------------------------------------------------------------------------------------------------------------------------------------------------------------------------------------------------------------------------------------------------------------------------------------------------------------------------------------------------------------------------------------------------------------------------------------------------------------------------------------------------------------------------------------------------------------------------------------------------------------------------------------------------------------------------------------------------------------------------------------------------------------------------------------------------------------------------------------------------------------------------------------------------------------------------------------------------------------------------------------------------------------------------------------------------------------------------------------------------------------------------------------------------------------------------------------------------------------------------------------------------------------------------------------------------------------------------------------------------------------------------------------------------------------------------------------------------------------------------------------------------------------------------------------------------------------------------------------------------------------------------------------------------------------------------------------------------------------------------------------------------------------------------------------------------------------------------------------------------------------|



|                        |      |                                                                                                                                                                                                                                                                                                                                                                                                                                                                                                                                                                                                                                                                                                                                                                                                                                                                                                                                                                                                                                                                                                                                                                                                                                                                                                                                                                                                                                                                                                                                                                                                                                                                                                                                                                                                                                                                                                                                                                                                                                                                                                                                                                                                                                                                                                                                                 |
|------------------------|------|-------------------------------------------------------------------------------------------------------------------------------------------------------------------------------------------------------------------------------------------------------------------------------------------------------------------------------------------------------------------------------------------------------------------------------------------------------------------------------------------------------------------------------------------------------------------------------------------------------------------------------------------------------------------------------------------------------------------------------------------------------------------------------------------------------------------------------------------------------------------------------------------------------------------------------------------------------------------------------------------------------------------------------------------------------------------------------------------------------------------------------------------------------------------------------------------------------------------------------------------------------------------------------------------------------------------------------------------------------------------------------------------------------------------------------------------------------------------------------------------------------------------------------------------------------------------------------------------------------------------------------------------------------------------------------------------------------------------------------------------------------------------------------------------------------------------------------------------------------------------------------------------------------------------------------------------------------------------------------------------------------------------------------------------------------------------------------------------------------------------------------------------------------------------------------------------------------------------------------------------------------------------------------------------------------------------------------------------------|
|                        |      | <p> <i>LINC01877 MYOM2 SLC5A12 NCS1 ONECUT1 PCDH11Y LINC00923 METAP1D USP31 SUMO2 OR5AQ1P MICOS10 XPNPEP1 GLYATL3 NUBPL PCGF5 FGF7P1 NLRC5 TUBBP9 LINC00363 NDUFAF2 GUCY1A2 KREMEN1 UMODL1 LINC01189 MB LINC00383 WDR25 SOD1P2 CYP4Z1 MGA LCE3D TNPO3 EFHB ACSM2A FGF9 DCUN1D4 DAZL NIN RPL23AP53 SLC1A1 HPCAL1 SPG21 ANKFY1 LIMCH1 ZKSCAN5 CCDC195 TSHZ3 TMCO4 LINC02098 RALA GMD5-DT BAZ2A MIR548A1HG RPS12 GNPTAB TRPM1 NTN1 COPS8 SACM1L AKAP9 C1QTNF3-AMACR PPIL2 AP4S1 NR5A2 PRKD1 SPTB TRAV8-1 TNFAIP8 RBM47 TMEM260 GBP6 SANBR DBF4B OR9Q1 CCL28 FBXO41 MICAL3 SNRPN HDAC2 MSI2 MRTFA LRRC7 LINC00221 ETS1 TNN UBAP2L CASZ1 PCDH8 LINC01673 WDHD1 MIR155HG MAMDC2-AS1 RABEP1 ST6GAL2 LINC00930 NUTM2HP SLX4IP PTCHD4 BANP ALKAL2 MAP2 YME1L1P1 TGFA ZFYVE26 SNX3 LINC01422 ZNF280B PTPRA CEACAM7 TNRC6C TMEM161A DEFB108B OR11G2 LINC02451 WSCD2 UBE3D GLIDR ZNF402P CERS3-AS1 RPL23AP87 GOLGA6C ABCA4 ZFAND3 LINC01718 THUMP2 C6orf118 FAM83F CNKSR1 RAB12 TMEM163 PCDH9 LINC02235 SLF1 EXOC1L BACH1 RBMS3 POTEH GNA14 OXNAD1 INMT-MINDY4 LINC01992 SRFBP1 MATN2 TM7SF3 IL33 EFCAB2 MARK4 CRACK2A CLEC16A LINC01901 OR2T3 SERPINB10 PROX1-AS1 ACTN1-DT ARHGEF17 ME3 PSG6 ZNF431 CACYBP ITGA9 PPP1R1C ULK2 IARS2 UNC13C CDC42BPB HNRNPH3P1 TMEM44-AS1 LINC00298 FAM217B MTRF1 FAM25G SHROOM2 OVCH1 CISD1 C16orf95 CRTAC1 PRKAB1 RALGAP1 LMX1B LINC01748 L3MBTL3 RRAGD IGKV2OR22-3 POMT2 MICALL2 ST13 LINC02245 CLIP1 MARCHF8 SHC4 C2orf42 CABLES1 MORC2 ZNF613 TLL1 DEFA8P FRMD6-AS2 DUSP16 BCL11A AKR1C3 PPP2R5E ASB7 FREM1 IL20RB ADAM22 RABL2A LINC02582 LINC01811 CNIH3 RPF1 TRIT1 TBCD CEPT1 WNT5B KCNK5 CEP44 HKDC1 CLNS1A EPS15L1 PVT1 CHN1 ETV6 WNT9B RFX7 TRPS1 SERBP1 SKINT1L IGKV3OR22-2 RANBP2 ADAMTS5 NF2 STRN CRISPLD2 NPM1P1 ANTXR1P1 MTMR3 ZNF845 RN7SL250P FAM25C CRKL ITPRIP H2BC15 ADGRA3 SCG5 CLDN18 LINC00581 ADCY9 DPP10 TUBB2BP1 GALNT16 CDH5 ANO6 ZNF600 HIPK1 A2MP1 PGPEP1 ACSM2B TTC7B PEPD ATP2B1 IFI44 RETREG1 NLRP14 PCNT NPHP3-AS1 PAH FAM138E ATRN FBLN5 CNOT6L TRAPPC6B TOP1 ZNHIT6 SLC39A6 WDSUB1 ANKRD20A7P</i> </p>                                                                                                                                                                                                                                                                                  |
| downregulated-11470,05 | 1031 | <p> <i>GRAP2 ITGA5 BTG2 CYP26A1 RTKN2 IGF1 LMAN1 NTRK1 UBAC1 GDF15 ASNSP1 TRIB3 REEP6 CCDC88B LINC02864 STK16 XK HEPH BBC3 CASTOR2 PCOLCE TSC22D1 LHFPL2 EPS8 ITM2B UTRN TRIQK ACSBG2 SNX16 GPC5 GTPBP1 PDIA3 CA11 ALDOC NECTIN2 ZNF83 SEL1L3 ZCRB1 GDPD5 ENSG00000213963 OXLD1 DDB2 ANO5 LINC02267 LTBP4 TSPAN13 STARD5 MT-ND4L VWA5A NAT8L TNFRSF9 ENSG00000224271 GTF3C3 DMTN AP3M2 LINC00656 CORO2A APOE C3 KLHL36 BTN3A1 DNMI1 HYOU1 SLC16A5 KBTBD3 SORT1 LLGL2 NFKB2 PGGHG MYO15B IFT140 GMPPA MLF1 SLC6A6 DUSP5 ID1 COL18A1 ELAPOR2 A4GALT BCAM PCK2 ADAM19 THRB MMP15 ZBTB11 EXOC2 GUCA1B LSM4 POMT1 NUCB1 TLCD2 DDHD2 RYR1 NUDT12 ZNF467 MAN2B1 FGFR3 HES7 EPHA1-AS1 TKTL1 TM6SF1 TFAP2B AKNA NBR1 PKHD1 INPP5J FAM234A SELENOP UBE2L6 TMED9 MYORG TDRKH TLE2 LONRF2 GIPR AHCYL1 STON1 YIPF2 FN1 RBPMS PTPRH SHFL GGA1 DGKD SERTAD2 CYSTM1 IGSF8 ZNF275 ACAD11 GAA ENTR1 ACSF2 BTK TJP3 CLCA1 AURKB HID1 ZC3H6 GABBR1 PAX8-AS1 DEF8 MANF PLA2G6 CCDC113 PRR36 CEBPD GPR158 CALR4P WARS1 ADCY3 TMEM241 PHYKPL GRHL1 LARGE2 WDR91 HAGH TMED7 YPEL5 ITGB1 PI15 TAB2 CPD BRSK1 PECR KRT8 SYDE2 UCA1 SVIP PCAT14 TMRSS4 GABPB1-AS1 ACADVL ISCU GLI1 HBP1 PHGDH MCFD2 EPS15 IL13RA1 SH3BGR12 ENO2 B2M ADAMTSL4 EHD2 MAP1A AGER SAT2 SNTA1 TCFL5 CLIP2 WNK4 VPS16 C1GALT1 CD93 KDM6B RRAS PCDH15 PCED1A PPDPF TMEM106C BAIAP3 IL15RA H1-10 SCFD1 ZKSCAN1 RABAC1 ADGRE2 ESRRB EPSTI1 BSDC1 POFUT2 RASGEF1A CTCFL XYLT2 TMEM263 BCL6 TPD52L1 PROS1 FGFR4 CRAT NYAP1 VEGFA PIK3CD DMBX1 TGFB1 ABHD18 PSEN2 CHST2 SNHG32 NTS ULBP1 PIGK ZDHHC8P1 PLOD2 KLF9 RPL27 LAMA3 SLC30A2 KIF1B GPD1L B4GALT4 PSRC1 ALAS1 PDK4 SMIM1 ENSG00000286403 CPZ PTTG1 LINC02416 ZSWIM4 TARBP1 BLVRB GTPBP2 ATP2A3 SMARCA1 PLXND1 SMURF2 ACER3 UCP2 ARHGAP8 RFK DNAJB11 CACNA2D2 SLC22A5 DOCK6 SLC25A42 FMNL1 PTPRC EEFA12 FAM83A HEXD GPR155 RAB24 SPEG IQGAP3 SHC2 INPPL1 TMCO6 MAP3K14-AS1 GSEC RTCA-AS1 DCTN4 HNRNCP4 CNN2 DBP PPP1R13L LRRC63 GFPT1 FCGR2A MC4R MAN1A1 STARD8 FNDC4 PCED1B OCELI1 MKNK2 BATF2 SLC29A4 NIBAN2 UXT-AS1 LINC02432 PALM PARP12 SLC22A23 C6orf89 LDLRAP1 TUBB2B SLC31A1 AFDN-DT IRAK2 MFGE8 SH3BP2 SH3TC2 AGRN RTN2 TSKU RHOT1P2 APBB3 GPSM1 GADD45A TMEM70 LRP1 SH3PXD2B MMP14 SERPIN11 PPP2R5B PTPRF NIPSNAP2 NDRG1 CPXM1 MRPL23-AS1 ERFE ABCB9 TRAK2 ENSG00000249631 LGALS3 PDLIM4 CLSTN3 NFE2L3 STAT5B ENSG00000253154</i> </p> |



|  |                                                                                                                                                                                                                                                                                                                                                                                                                                                                                                                                                                                                                                                                                                                                                                                                                                                                                                                                                                                                                                                                                                                                                                                                                                                                                                                                                                                                                                                                                                                                                                                                                                                                                                                                                                                                                                                                                                                                                                                                                                                                                                                                                                                                                                                                                                                                                                                                                                                                                                                                                                                                                                                                                                                                                                                                                                                                                                                                                                                                                                                                                                                                                                                                                                                                                                                                                                                                                                                                                                                                                                                                                                                                                                                                                                                                                                                                                                                                                                                                                                                                                                                                                                                                                                                                                                                                                                                                                                  |
|--|----------------------------------------------------------------------------------------------------------------------------------------------------------------------------------------------------------------------------------------------------------------------------------------------------------------------------------------------------------------------------------------------------------------------------------------------------------------------------------------------------------------------------------------------------------------------------------------------------------------------------------------------------------------------------------------------------------------------------------------------------------------------------------------------------------------------------------------------------------------------------------------------------------------------------------------------------------------------------------------------------------------------------------------------------------------------------------------------------------------------------------------------------------------------------------------------------------------------------------------------------------------------------------------------------------------------------------------------------------------------------------------------------------------------------------------------------------------------------------------------------------------------------------------------------------------------------------------------------------------------------------------------------------------------------------------------------------------------------------------------------------------------------------------------------------------------------------------------------------------------------------------------------------------------------------------------------------------------------------------------------------------------------------------------------------------------------------------------------------------------------------------------------------------------------------------------------------------------------------------------------------------------------------------------------------------------------------------------------------------------------------------------------------------------------------------------------------------------------------------------------------------------------------------------------------------------------------------------------------------------------------------------------------------------------------------------------------------------------------------------------------------------------------------------------------------------------------------------------------------------------------------------------------------------------------------------------------------------------------------------------------------------------------------------------------------------------------------------------------------------------------------------------------------------------------------------------------------------------------------------------------------------------------------------------------------------------------------------------------------------------------------------------------------------------------------------------------------------------------------------------------------------------------------------------------------------------------------------------------------------------------------------------------------------------------------------------------------------------------------------------------------------------------------------------------------------------------------------------------------------------------------------------------------------------------------------------------------------------------------------------------------------------------------------------------------------------------------------------------------------------------------------------------------------------------------------------------------------------------------------------------------------------------------------------------------------------------------------------------------------------------------------------------------------------------|
|  | <p> <i>ENSG00000286488 SLC22A31 ARL6IP5 TMEM50B DBNDD1 C11orf80 SCN1B ACVR1 PLEKHH1 GOLGA2 F2R LPCAT4 THBS1 ACSL1 ASMTL CMAS AFDN UBE2H SLC6A8 PDE7A NFE2L1 GEMIN2 PAAF1 C2CD2L GSDMB GAL3ST4 FUCA1 MACC1 SOCS1 BHLHE40 KIAA0895 ROBO3 SLC17A6-DT LRSAM1 PLXNB2 INHBE NUP107 SLC25A36 RAB11FIP1 SDC3 NR2F6 ZNF396 CAMTA2 HIP1R PLEKHA2 ENO3 ZNF204P ENSG00000271382 STX10 TSPAN18 MCF2 MAN1B1 P4HA1 TMEM243 FECH LRRC20 ANKRD20A11P IL10RA VCAN PCYOX1L ARG2 FBXL16 GDE1 MAP4K2 LAMB2 PDIA6 TGFBR3 ZMYM2 DYNC2LI1 CDKN1A IL32 RPS6KA1 CUL7 FAM214B ERMN CCDC71L HRC LRG1 ENSG00000236393 GUK1 MAF ENSG00000229191 HOOK1 GTF2E2 MAPK8IP3 CRYL1 PRKACA IFIH1 MVB12A IDH1 ZKSCAN8P1 ANO8 NUDT4 MICAL1 SWI5 SEMA3F HAX1 NEK9 NHLH1 PID1 CD200R1 INPP4A PTPRU ATP8B3 ST6GAL1 SIAE SKIL ALAS2 ST3GAL5 SDF2L1 KLF13 RNF11 DLK1 COL11A1 LTK YARS1 RAB18 RPL29P14 AMPD2 PITPNC1 SEMA6B PLP1 MLLT11 LINC00663 ENGASE PYCR2 KCNJ11 SEC24A IFITM1 GAS6 KRBA1 THUMPD3-AS1 MT2A MYO1D SFXN5 FLT4 SESTD1 UBR5-DT RHOTB1 LINC02384 CHPF SMAP2 CALCOCO1 MAP7D1 DEPP1 COL1A2 DTNA AMIGO2 RELL2 PROCR ZNF697 EHHADH LAPTM4B ITGB5 C4orf46 REEP2 ARFGAP1 SMAD6 RHBDD1 FAM171A2 PVR ZBED5 TMEM63A FNBPI PITPNM1 ANKZF1 DUSP8 MLXIP KHNYN RCN3 PRCP YIF1B WASL NFE2 ADD3 PTEN MAST2 ANXA1 GTF2A1 ARVCF DENND11 ID3 NBEAL1 TIA1 HLTFL POLI FAM234B GPR180 POLG2 PTK2B UNC5B LINC01419 MFSDF CHID1 PTPDC1 USP20 PPM1J CALB1 B4GALNT4 MDGA2 PKD1 CCDC50 RGS16 CRYZL1 SMIM3 TGM2 TCAF1 LYRM1 NFATC4 FHIP2B PDLIM7 STX2 SLC44A2 COG6 CD55 ACAT1 AARS1 SMAD3 ATF3 TRDN CARD11 APOL6 RTN4R SEPTIN6 OSTF1 CAMSAP3 TEX19 CTIF TBC1D5 SOCS2-AS1 LINC00173 THOC2 LGALS1 COL15A1 CASP10 NPAS1 DACT3 MINK1 HLA-E BTN3A2 SYT5 SEMA3A R3HDM4 TRIM3 MGAT5 RTN3 ULK1 ZNF175 TMEM143 MRAP2 MYO5B COPG1 CD36 ZNF117 CENPH TTYH3 ZNF692 IDH2 EFHD1 COX6A1P2 PAX9 GALNT5 NIPSNAP1 TNNI3 RNF145 GDI1 TSC22D3 CCM2 ARID5B FLNC TMCC2 HACE1 NOTUM SPTAN1 ATP7A COLGALT2 ENSG00000283125 PAN2 RAB26 DCLRE1B NDUFB4 BCL9L MAPT HSPA4L TTBK2 RNF103 CXCL8 KHK HDAC9 WIPF3 LITAF NLGN2 DLG3 MSI1 CC2D1A ZCCHC24 PIM1 PCLO THBD SERINC2 ADGRL1 HECW2 IARS1 TENM1 BNIP3 PRR14L CCNL2 CDC42SE1 CBLB MIIP AP2M1 OAS3 ANXA6 TSPYL2 VBP1 MORF4L2 NEMP2 PRKAB2 MAP3K8 LMG4 STOM GSN ENSG00000264112 MAPRE3 RIMS3 ENSG00000286750 RHBDD2 LMOD1 PDGFB CALR RGL3 ITGAV RTN4RL2 ITPKA ANGEL1 BTBD2 RHAG PTK7 PHKA1 HELZ2 ENSG00000255347 RAB6B DENND4B SLC25A29 ENSG00000204745 ENSG00000258274 ROBO1 APAF1 TRPT1 TNK2 TBC1D20 KIF5A CCSAP ENSG00000287737 LINC01033 RNF187 MRC2 AGPAT4 SFMBT2 ACVR1C SETD5 GALNT12 SALL2 ENSG00000279164 SH3GLB2 SNX2 ABI3BP ATP1B2 SEMA7A GABARAPL1 ATM ODF2L KLF12 GTF2H4 ARRB1 ITM2C NSD3 USP45 AHSA2P LINC02863 MAN2A1 OBSCN PPIB RBL2 CD46 ENSG00000286980 C4orf33 HJV RPH3AL G0S2 SLC4A7 PLEKHH2 SEC22B TTC7A SLC17A7 ENSG00000273901 MEIS3 MUC4 BRPF3-AS1 SLC35F3 ARRDC4 RAB31 ENSG00000257086 ZBED8 ANKRD9 AZU1 LAMA5 SPATS2 KPNA5 KMT5C EHBP1 ENSG00000257337 TXNIP NIM1K TMEM41B CXorf38 CORO6 EPHX2 LPAR2 MARCHF2 FBXO44 FAM131A PSME1 CHAC1 MAST1 ZMYM1 MTATP6P1 ADGRA2 LINC02772 ARHGEF40 ZNF558 TRPM4 ZP3 RNF213 ACSS2 PDIA5 KIAA0040 KCTD20 FLNC-AS1 ACE CLDN12 TPD52 EML2 TUBE1 WDR31 SLC37A4 CREB3L2 WBP1L IVNSIABP OGT ABCG2 RHPN1 P4HA2 FUT1 SERGEF PTPRS COTL1 TMEM9 PEX2 SESN3 WDR11 DAB2 MARCKS RBCK1 SERPINH1 SH2D3A ZDHHC8 VWDE CD59 IL2RA CD24 NFASC DDIT4 BST2 ATP1A2 OPTN HERPUD1 SCPEP1 ENSG00000285108 KLF7 DMKN DNASE2 LGMN MSH5 MYRF PYGL SNPH STARD10 EPB41L2 SOX5 GOLM2 ETFDH PCSK4 ENSG00000225528 KCNAB2 CCDC18-AS1 GALK2 MTURN TSPO RAB3B SEMA6C ERBB3 SERPINB1 TCAF2 GGT7 TUT7 CALU HSPA5 WIP1 DENND3 PAFAH2 TP53INP1 LDAF1 FADS3 VPS28 ULBP2 ANAPC16 EPHX1 NCBP2 GPSM3 ENSG00000259953 ADGRL3 SIL1 MICAL2 CPNE3 CAPRIN2 TNFRSF1B LGALS9 RBM22 STK4 HMGCL FGFR1OP2 TRIM38 ENSG00000272941 CA2 CTBS DCP2 FGD1 PIGS HSP90B1 ANKRD29 GTDC1 MXD3 NIT1 TNFRSF10B TCIRG1 PAPSS1 SIDT2 GRN ACAD10 LINC01278 SMIM14 EDEM1 SEMA4G METTL25B RIPOR3 DZIP3 TTLL3 ERP44 ITM2A ETAA1 MTCL1 NRIP3 GPC2 PAIP2B ACBD4 CDKN1C NIPA1 CLYBL CYP26B1 PRSS16 GNB5 C3orf18 EIF2AK1 RAVR2 SOCS2 PLPPR2 BRWD3 CR2 IFNGR1 MIR223HG PLEKHH3 TMOD1 NT5C2 PDK1 PPP1R16B ALS2CL SLC45A3 MEG3 REEP4 AMOTL1 DRAP1 PLCD3 TMEM30A OGA MORN4 SMPDL3B FAM227A SETD7 GSTO1 ACSL6 CORO7 RGS10 ZMIZ1 TKFC CCND2 QSOX1 ANKIB1 ABCA7 PLD3 CUEDC1 ENSG00000237643 PLEKHA4 STARD9 HEMK1 FDXR PAPLN NES CDCP1 RAB27A TXNRD3 CITED4 CUX1 UNC119 MALAT1 LRP4</i> </p> |
|--|----------------------------------------------------------------------------------------------------------------------------------------------------------------------------------------------------------------------------------------------------------------------------------------------------------------------------------------------------------------------------------------------------------------------------------------------------------------------------------------------------------------------------------------------------------------------------------------------------------------------------------------------------------------------------------------------------------------------------------------------------------------------------------------------------------------------------------------------------------------------------------------------------------------------------------------------------------------------------------------------------------------------------------------------------------------------------------------------------------------------------------------------------------------------------------------------------------------------------------------------------------------------------------------------------------------------------------------------------------------------------------------------------------------------------------------------------------------------------------------------------------------------------------------------------------------------------------------------------------------------------------------------------------------------------------------------------------------------------------------------------------------------------------------------------------------------------------------------------------------------------------------------------------------------------------------------------------------------------------------------------------------------------------------------------------------------------------------------------------------------------------------------------------------------------------------------------------------------------------------------------------------------------------------------------------------------------------------------------------------------------------------------------------------------------------------------------------------------------------------------------------------------------------------------------------------------------------------------------------------------------------------------------------------------------------------------------------------------------------------------------------------------------------------------------------------------------------------------------------------------------------------------------------------------------------------------------------------------------------------------------------------------------------------------------------------------------------------------------------------------------------------------------------------------------------------------------------------------------------------------------------------------------------------------------------------------------------------------------------------------------------------------------------------------------------------------------------------------------------------------------------------------------------------------------------------------------------------------------------------------------------------------------------------------------------------------------------------------------------------------------------------------------------------------------------------------------------------------------------------------------------------------------------------------------------------------------------------------------------------------------------------------------------------------------------------------------------------------------------------------------------------------------------------------------------------------------------------------------------------------------------------------------------------------------------------------------------------------------------------------------------------------------------------------------------|

|  |                                                                                                                                                                                                                                                                                                                                                                                                                                                  |
|--|--------------------------------------------------------------------------------------------------------------------------------------------------------------------------------------------------------------------------------------------------------------------------------------------------------------------------------------------------------------------------------------------------------------------------------------------------|
|  | <i>MLXIPL ELP1 BCL3 HIVEP3 ITGB3 RUSC1-AS1 MIF4GD PPP1R14C YIPF5 CERCAM F11R TDO2 GIPC1 FAM193B CEMIP2 MIR22HG SPARC FASTKD1 PPFA4 CTSZ LMNA NDUFA10 CCDC92 KLF10 PPP1R18 PANK4 SLC2A1-DT C18orf54 MAGED2 PDIA4 RFLNB ADAM15 LNCsRLR SLC4A11 PGM3 SESN2 TENT5A ZNF133 CISH CYP4F29P PXX WHRN NCOA4 RPS6KC1 SELENBP1 TMED4 MROH1 SUSP1 ICAM5 TUBB4A MBOAT2 MYBPHL GPAT3 TUBB1 NPTXR MNX1 PHF21A LINC01630 HDAC6 CYP2R1 TNNT1 MISP3 DCAF8 CTSC</i> |
|--|--------------------------------------------------------------------------------------------------------------------------------------------------------------------------------------------------------------------------------------------------------------------------------------------------------------------------------------------------------------------------------------------------------------------------------------------------|

**Table S16.** Expression levels (TPMs) of genes possessing the most frequent DSBs in HEK293T cells (mapped in hg9). Excel file attached separately. Related to Figure 6.

**Figure S1**

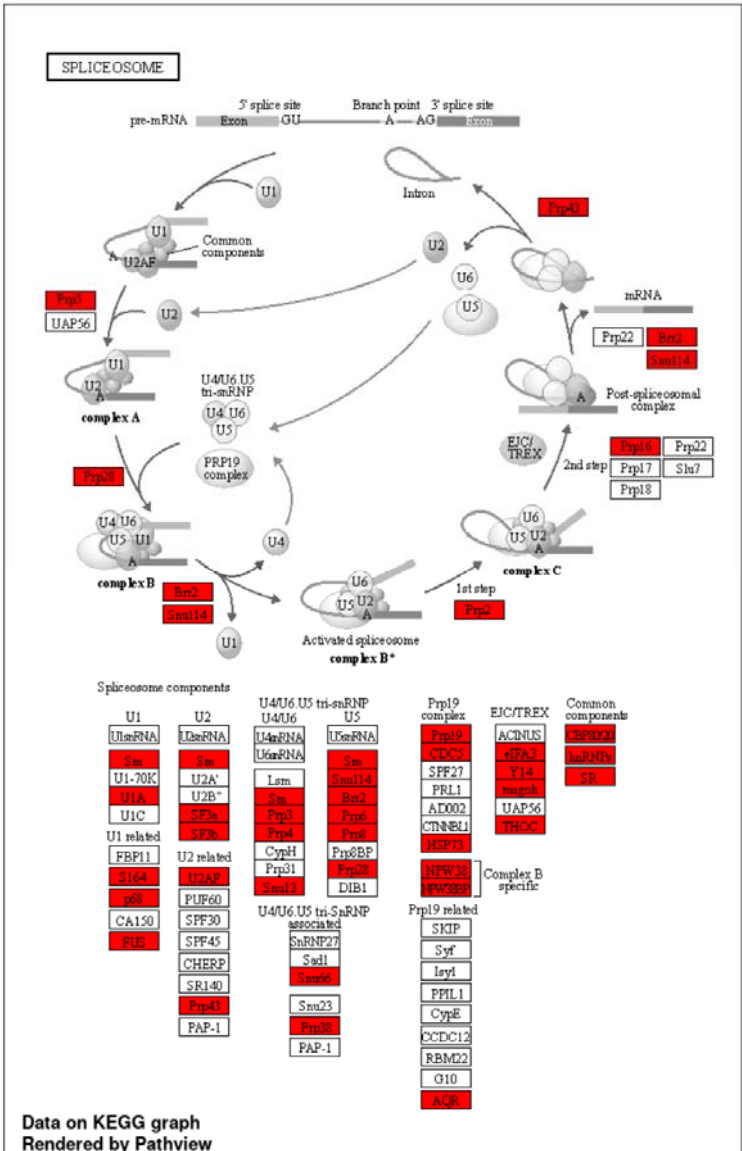

**Figure S1.** Analysis of 1285 upregulated genes in the course of hemin-induced differentiation genes in the KEGG database. The search was performed in the ShinyGO 0.77 database (<http://bioinformatics.sdstate.edu/go/>). Genes presented in red correspond to upregulated genes.
